# Supplementary material for: Gene Gangs of the Chloroviruses: Conserved Clusters of Collinear Monocistronic Genes
Source: MDPI journal article supplement (doi:10.3390/v10100576), 2018-10-20

**A** Conservation of Pairwise Distance: All Genomes

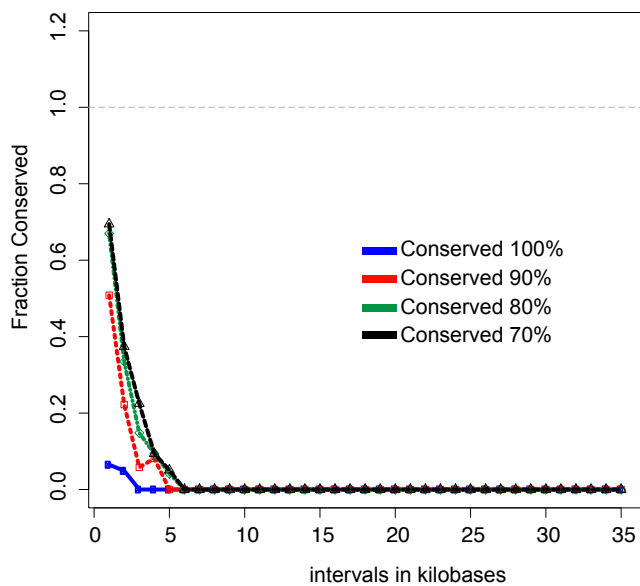

**B** Conservation of Pairwise Distance: Type PBI

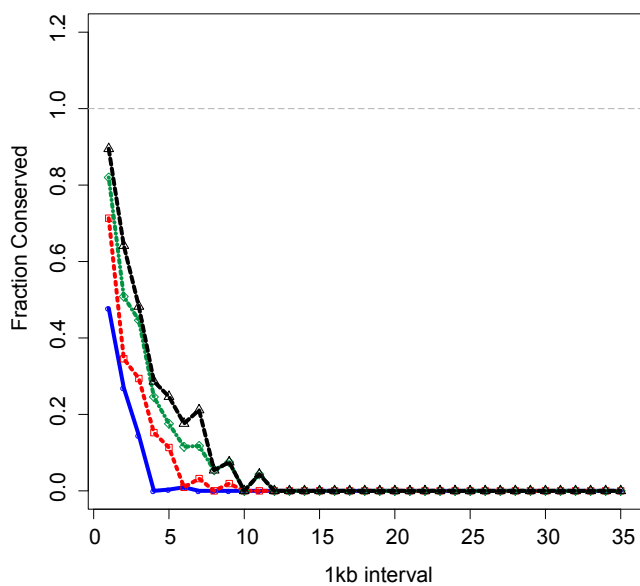

**C** Conservation of Pairwise Distance: Type NC64A

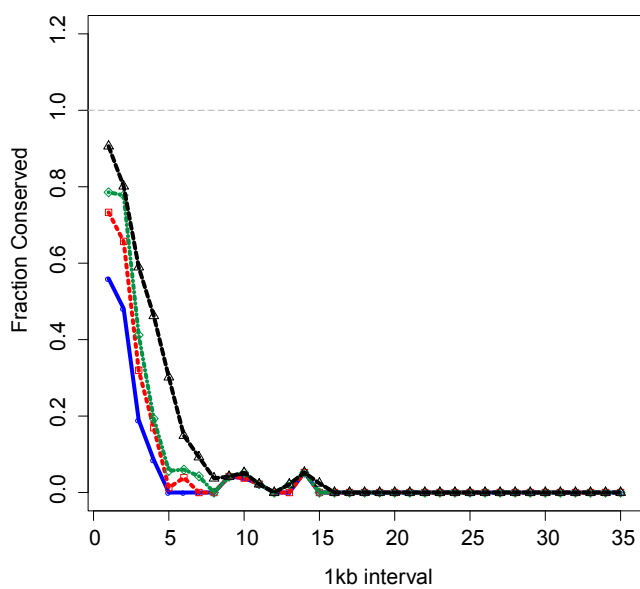

**D** Conservation of Pairwise Distance: Type SAG

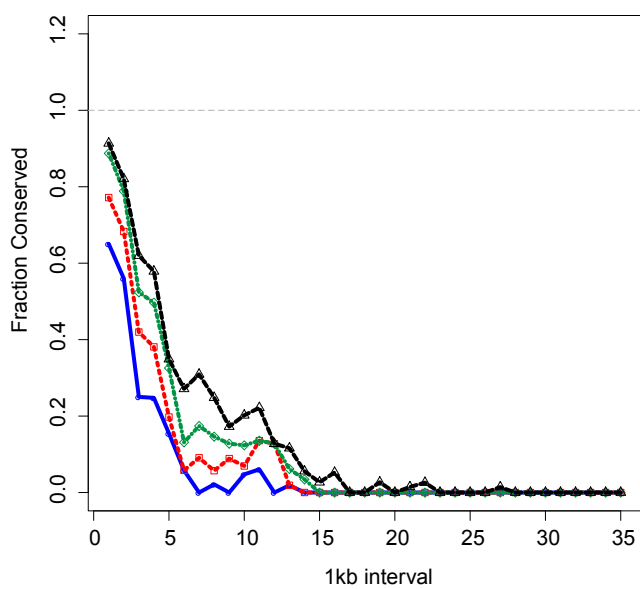

Supplement: s1 [file s1]
