# Supplementary material for: Gene Gangs of the Chloroviruses: Conserved Clusters of Collinear Monocistronic Genes
Source: MDPI journal article supplement (doi:10.3390/v10100576), 2018-10-20

Conservation of Pairwise Distance Across Group:  
Type NC64A\_v\_PBI

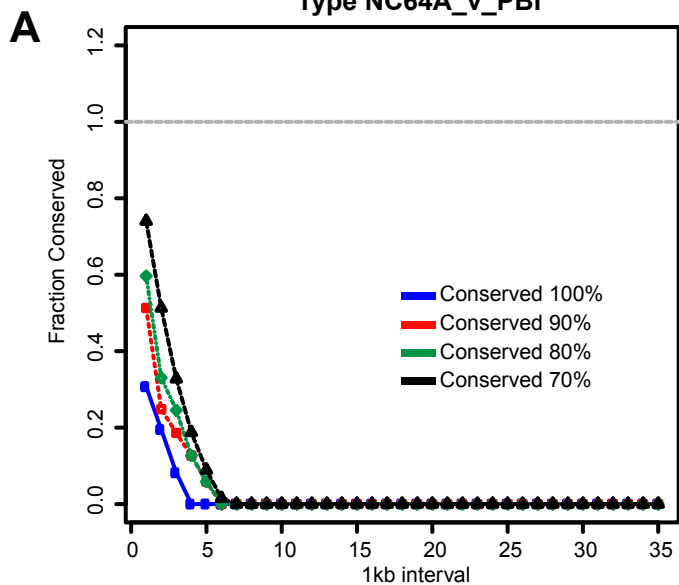

Conservation of Pairwise Distance Across Group:  
Type NC64A\_v\_SAG

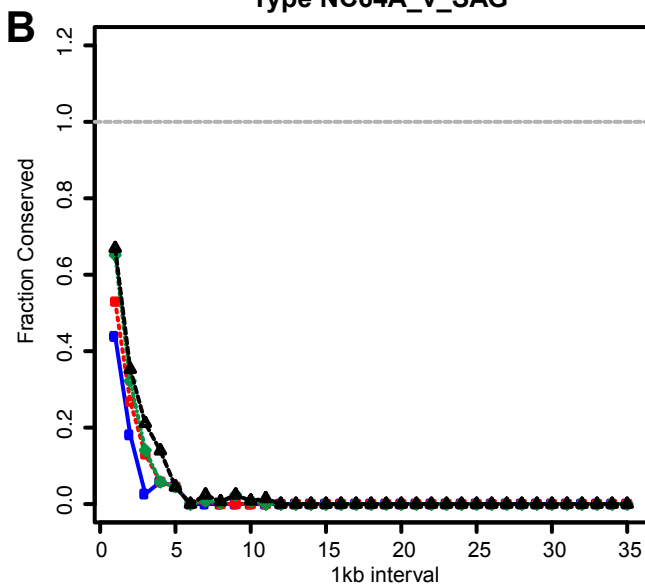

Conservation of Pairwise Distance Across Group:  
Type PBI\_v\_NC64A

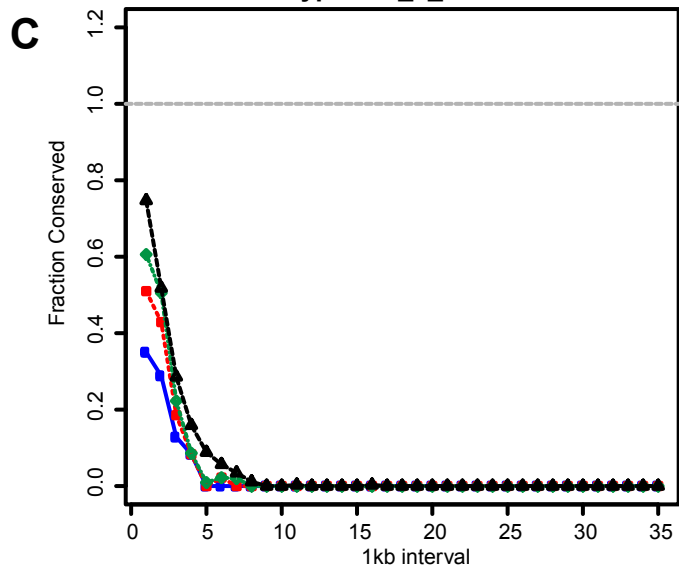

Conservation of Pairwise Distance Across Group:  
Type PBI\_v\_SAG

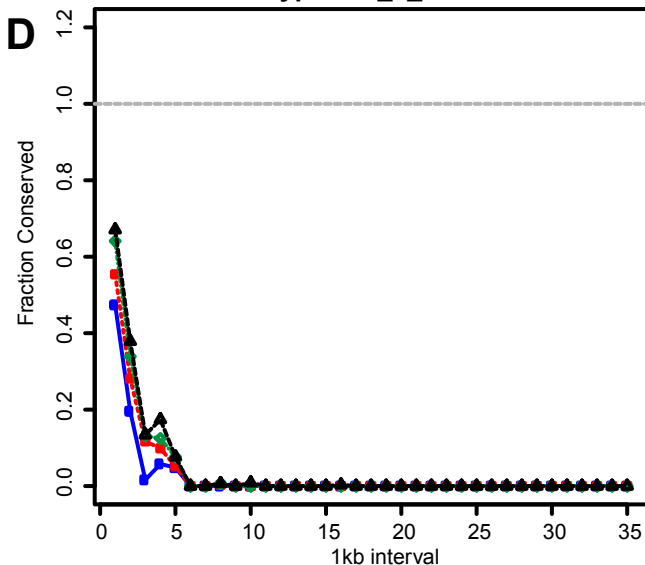

Conservation of Pairwise Distance Across Group:  
Type SAG\_v\_NC64A

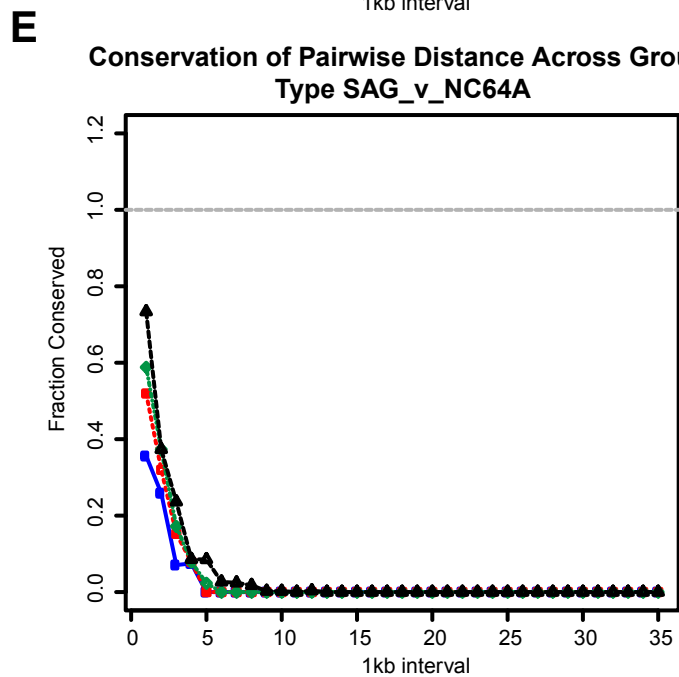

Conservation of Pairwise Distance Across Group:  
Type SAG\_v\_PBI

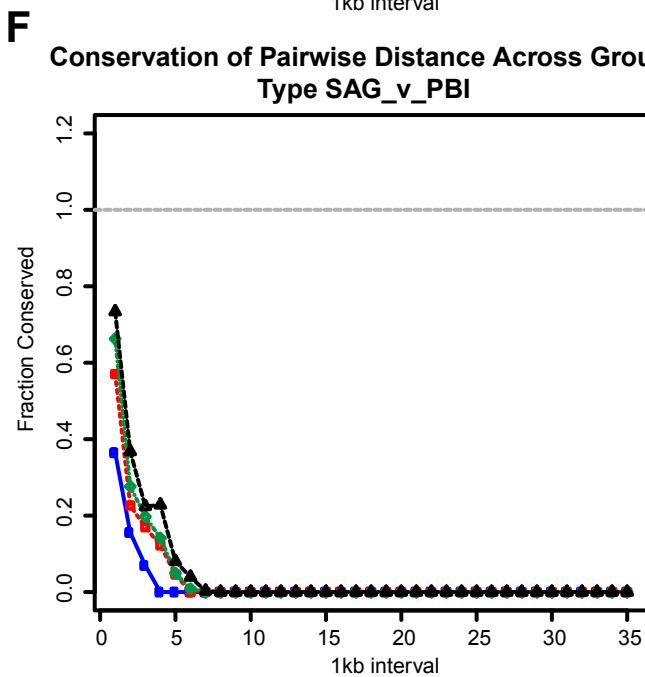

Supplement: s1 [file s1]
