# Supplementary figures and images for: Gene Gangs of the Chloroviruses: Conserved Clusters of Collinear Monocistronic Genes (part 1 of 9)
Source: MDPI journal article supplement (doi:10.3390/v10100576), 2018-10-20

**Bin\_conservation\_minus\_bg\_NE-JV-2\_vs\_OR0704.3**  
**PD-0.019783**

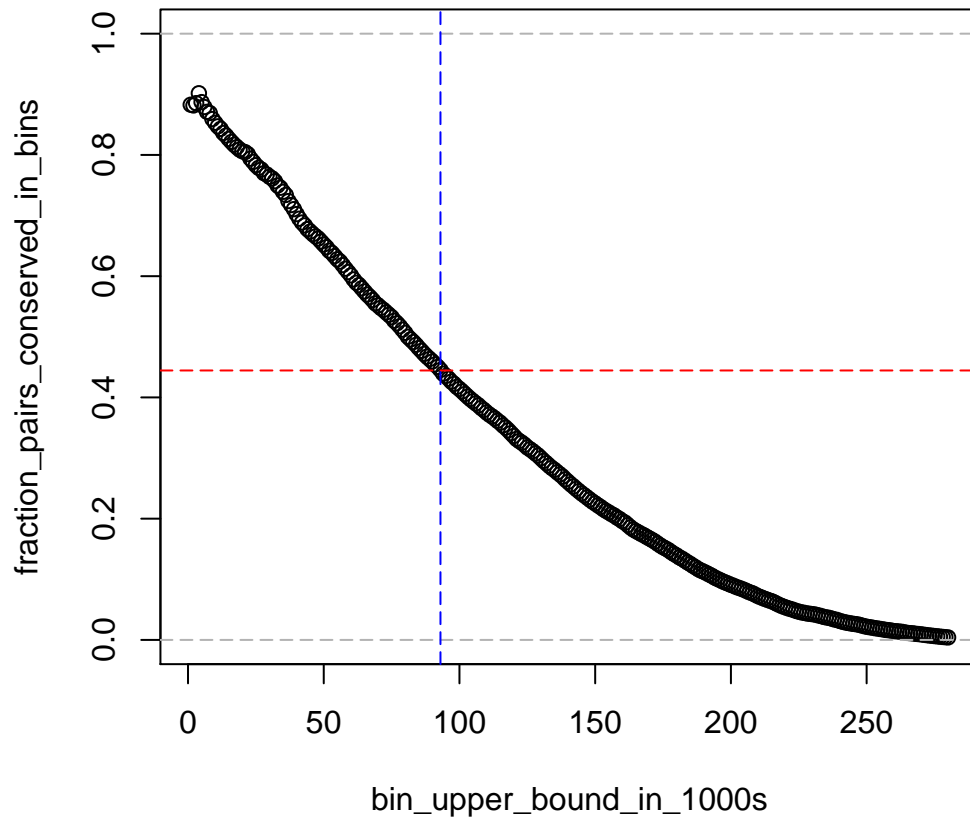

**Bin\_conservation\_minus\_bg\_NE-JV-2\_vs\_OR0704.3**  
**PD-0.019783**

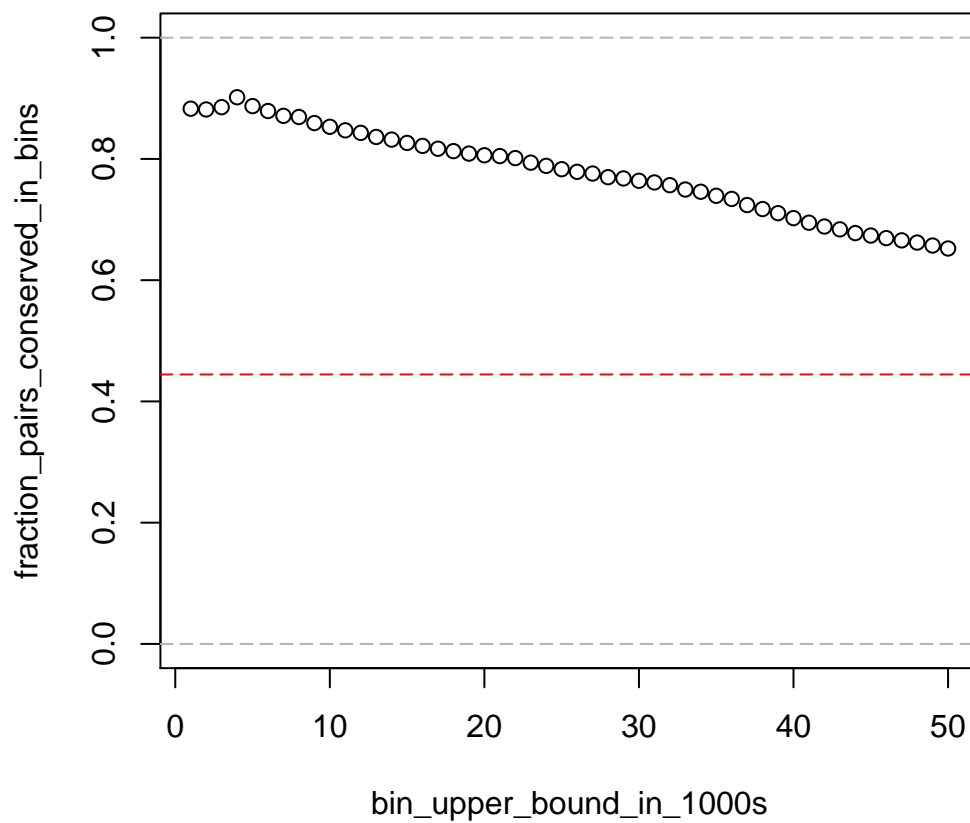

Supplement: s1 [file s1]

**Bin\_conservation\_minus\_bg\_KS1B\_vs\_WI0606**  
**PD-0.697407**

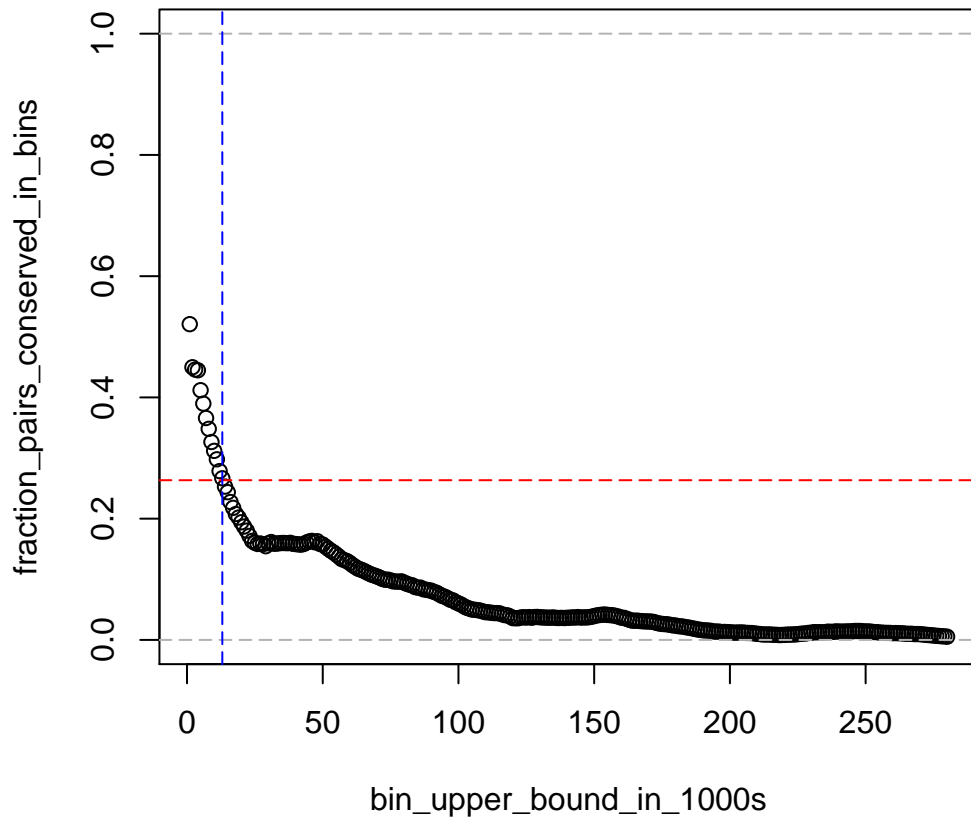

**Bin\_conservation\_minus\_bg\_KS1B\_vs\_WI0606**  
**PD-0.697407**

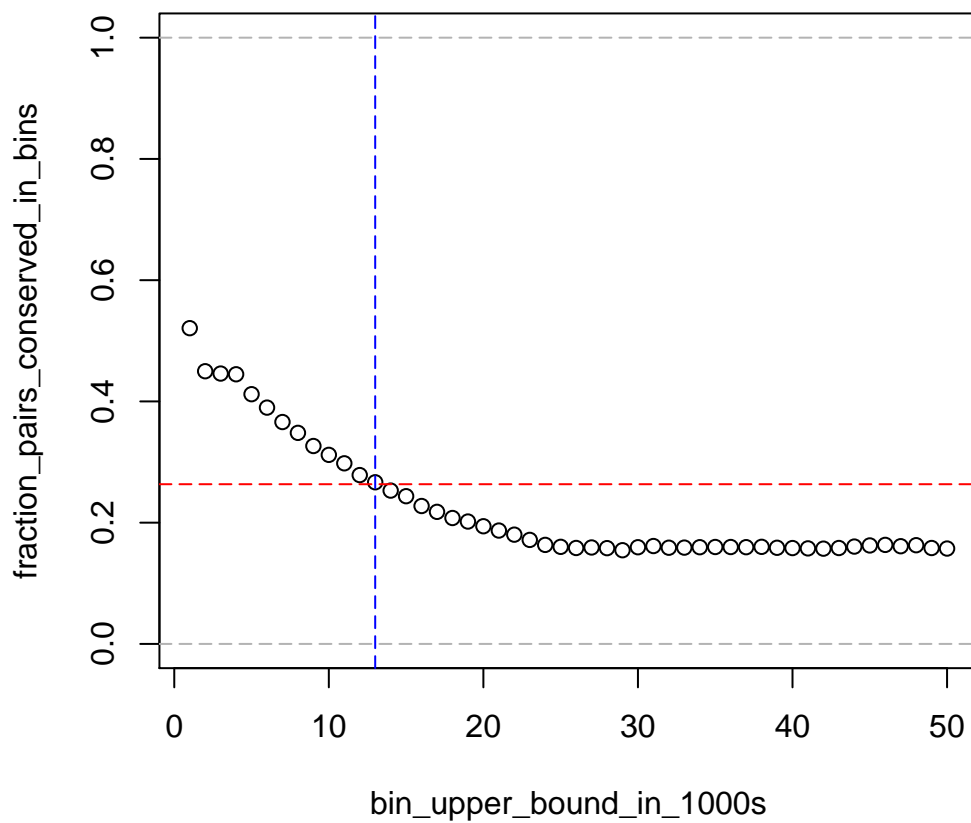

Supplement: s1 [file s1]

**Bin\_conservation\_minus\_bg\_NE-JV-3\_vs\_NY-2B**  
**PD-0.705945**

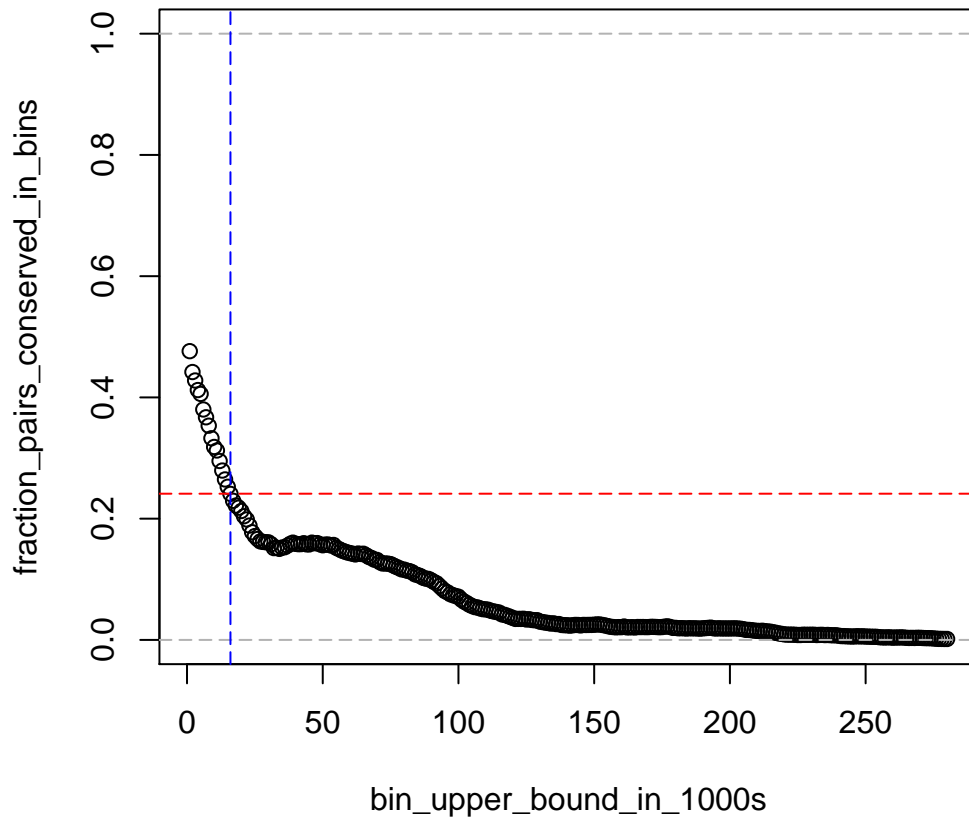

**Bin\_conservation\_minus\_bg\_NE-JV-3\_vs\_NY-2B**  
**PD-0.705945**

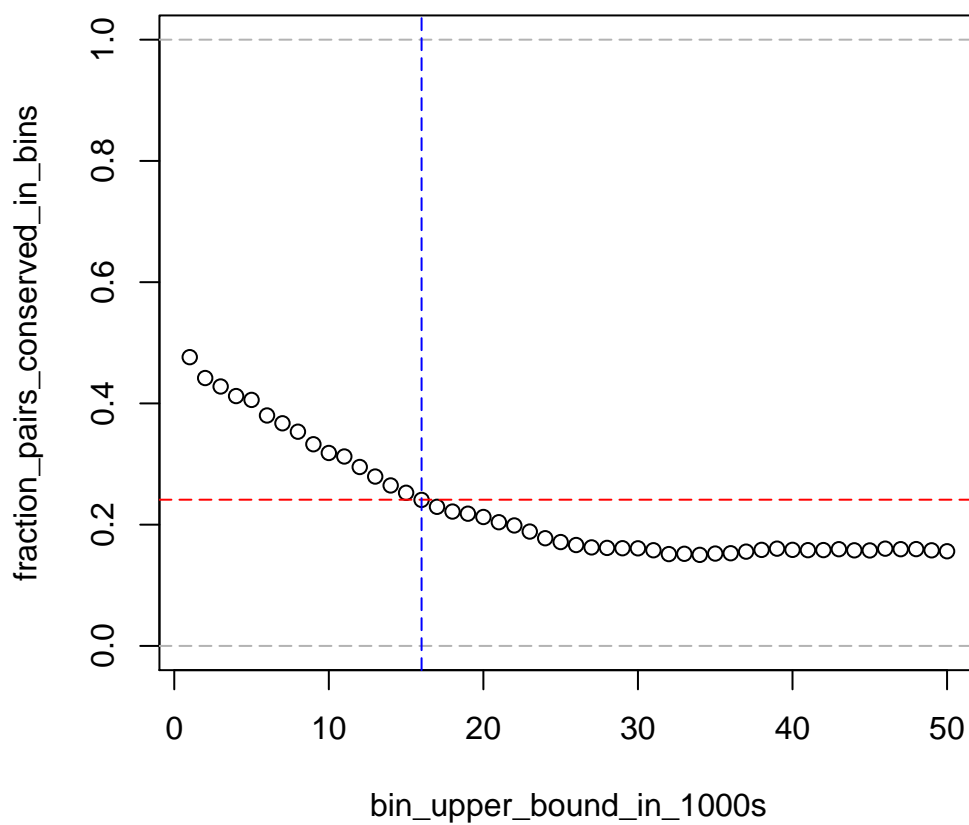

Supplement: s1 [file s1]

**Bin\_conservation\_minus\_bg\_CVM-1\_vs\_NY-2B**  
**PD-0.662647**

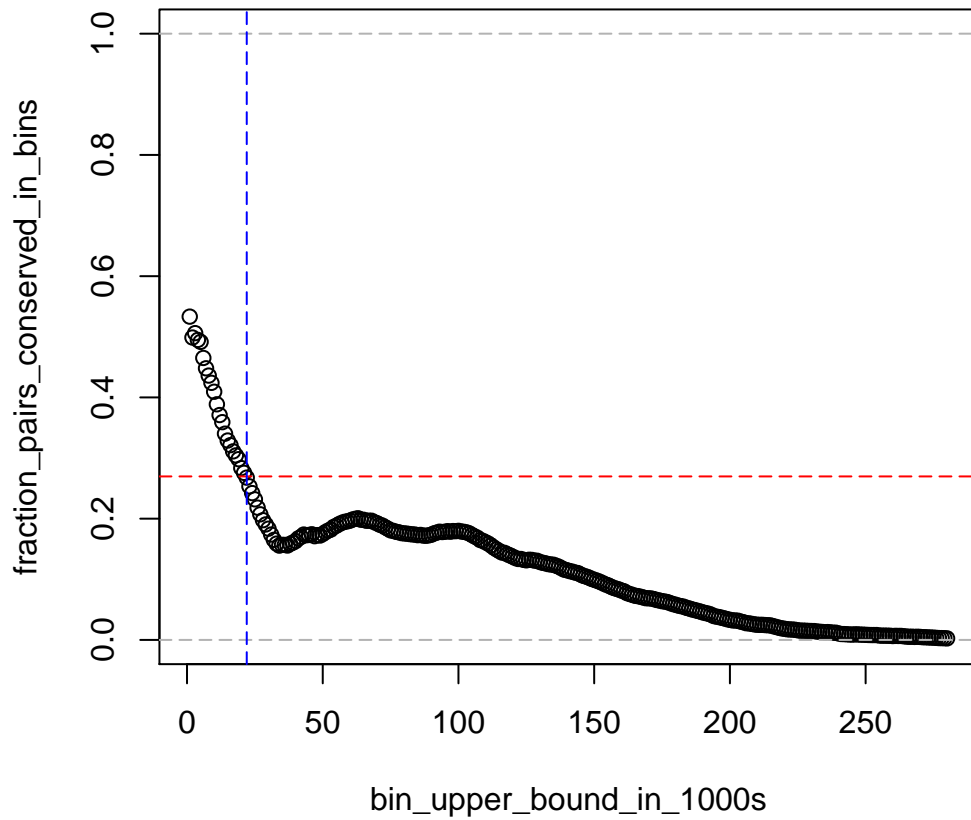

**Bin\_conservation\_minus\_bg\_CVM-1\_vs\_NY-2B**  
**PD-0.662647**

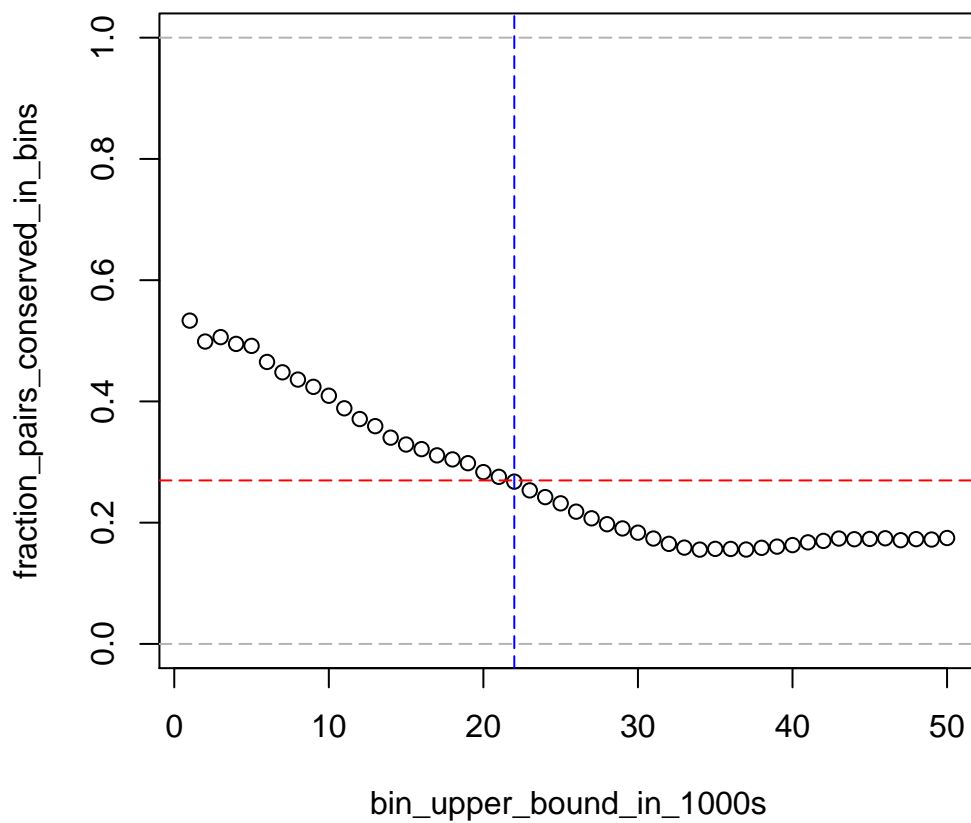

Supplement: s1 [file s1]

**Bin\_conservation\_minus\_bg\_FR483\_vs\_Fr5L**  
**PD-0.040879**

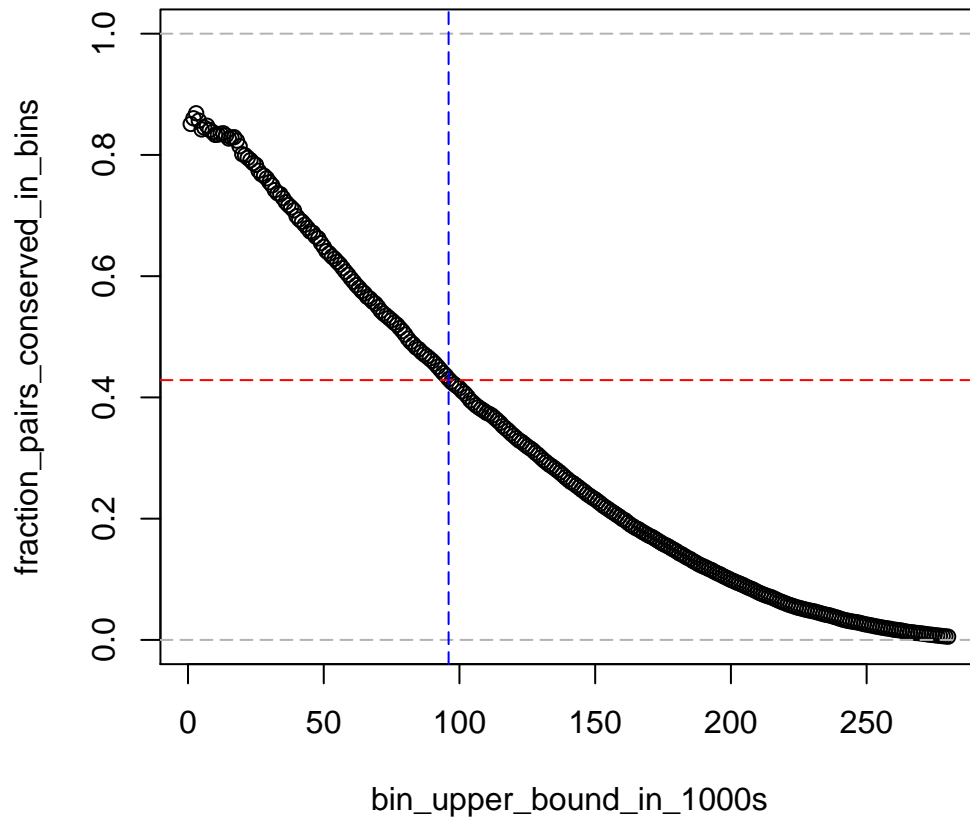

**Bin\_conservation\_minus\_bg\_FR483\_vs\_Fr5L**  
**PD-0.040879**

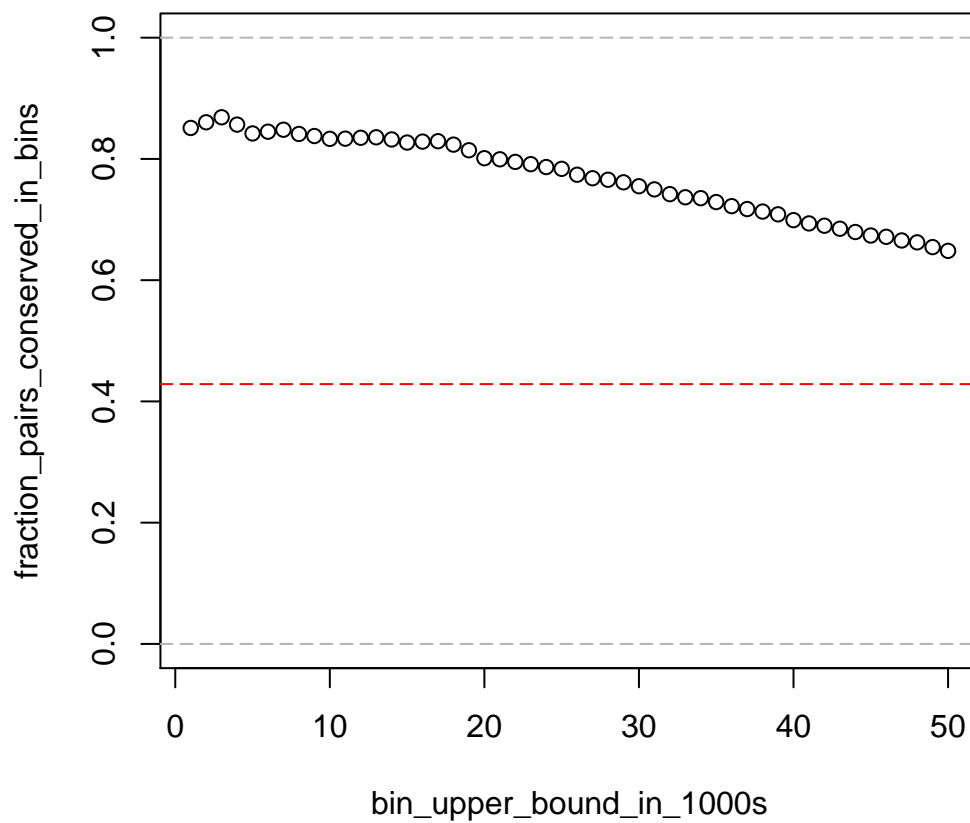

Supplement: s1 [file s1]

**Bin\_conservation\_minus\_bg\_MA-1E\_vs\_PBCV1**  
**PD-0.031123**

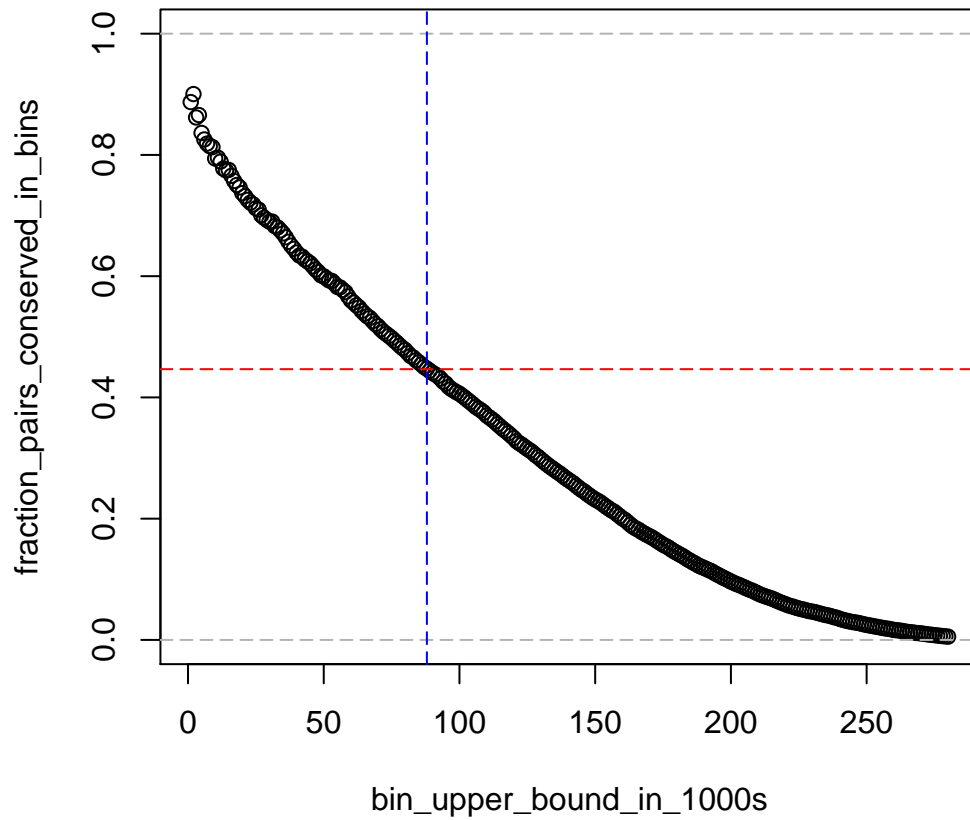

**Bin\_conservation\_minus\_bg\_MA-1E\_vs\_PBCV1**  
**PD-0.031123**

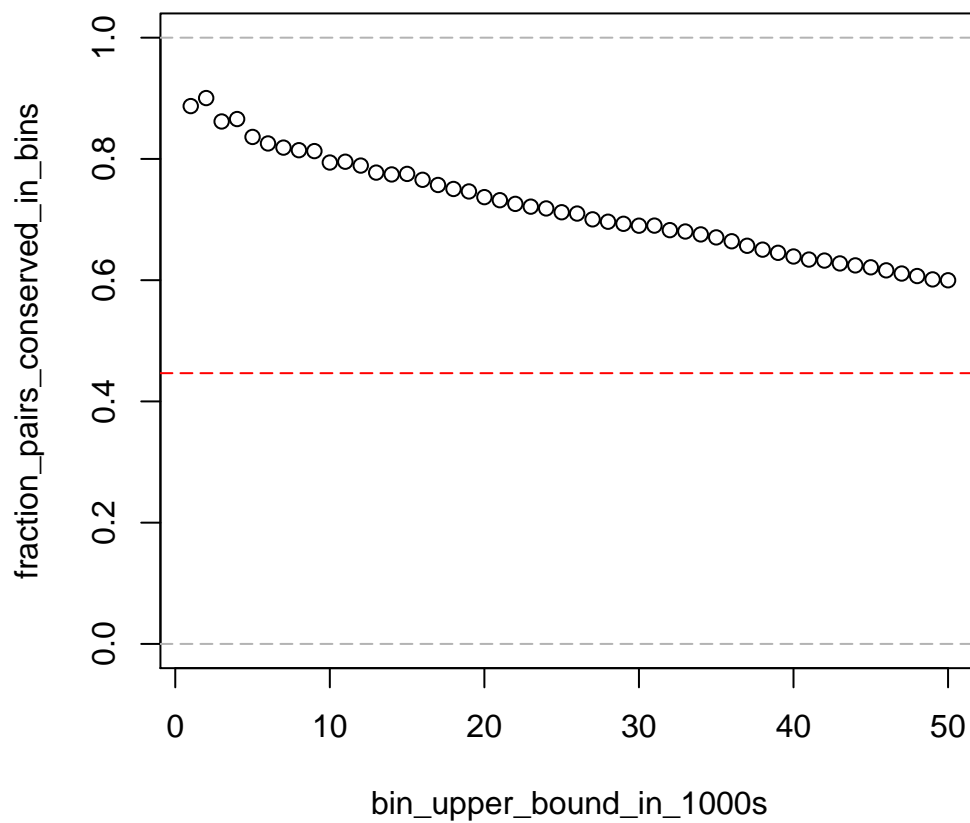

Supplement: s1 [file s1]

**Bin\_conservation\_minus\_bg\_CvsA1\_vs\_IL-5-2s1**  
**PD-0.148674**

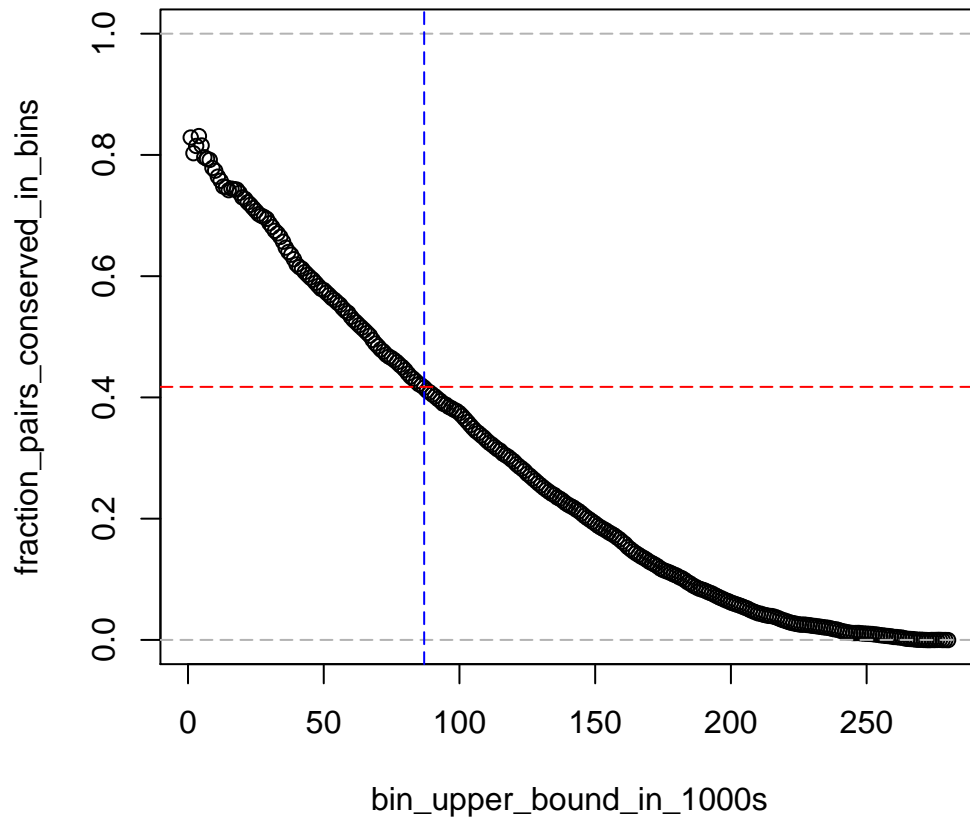

**Bin\_conservation\_minus\_bg\_CvsA1\_vs\_IL-5-2s1**  
**PD-0.148674**

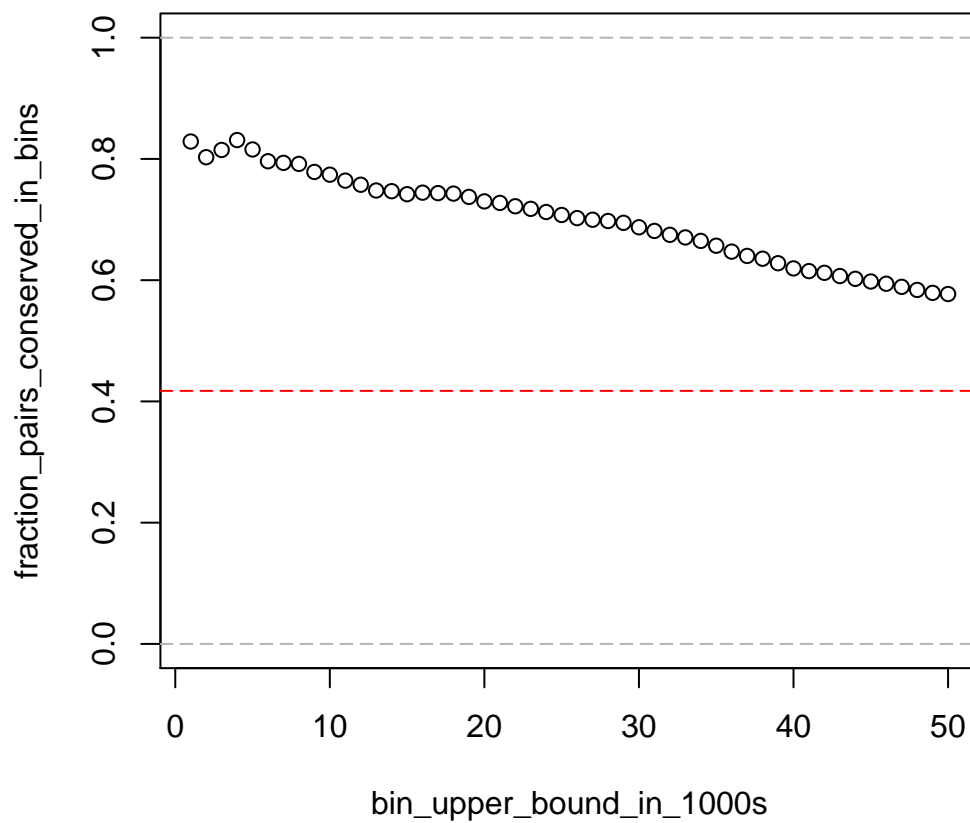

Supplement: s1 [file s1]

**Bin\_conservation\_minus\_bg\_MT325\_vs\_NY-2B**  
**PD-0.662291**

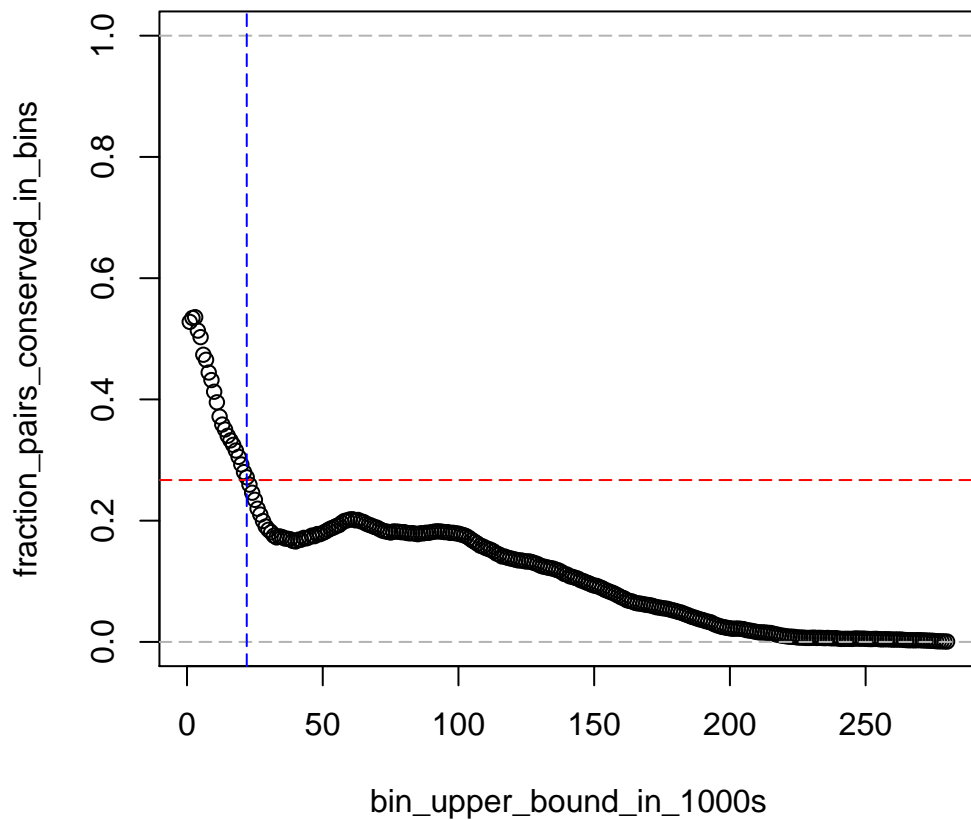

**Bin\_conservation\_minus\_bg\_MT325\_vs\_NY-2B**  
**PD-0.662291**

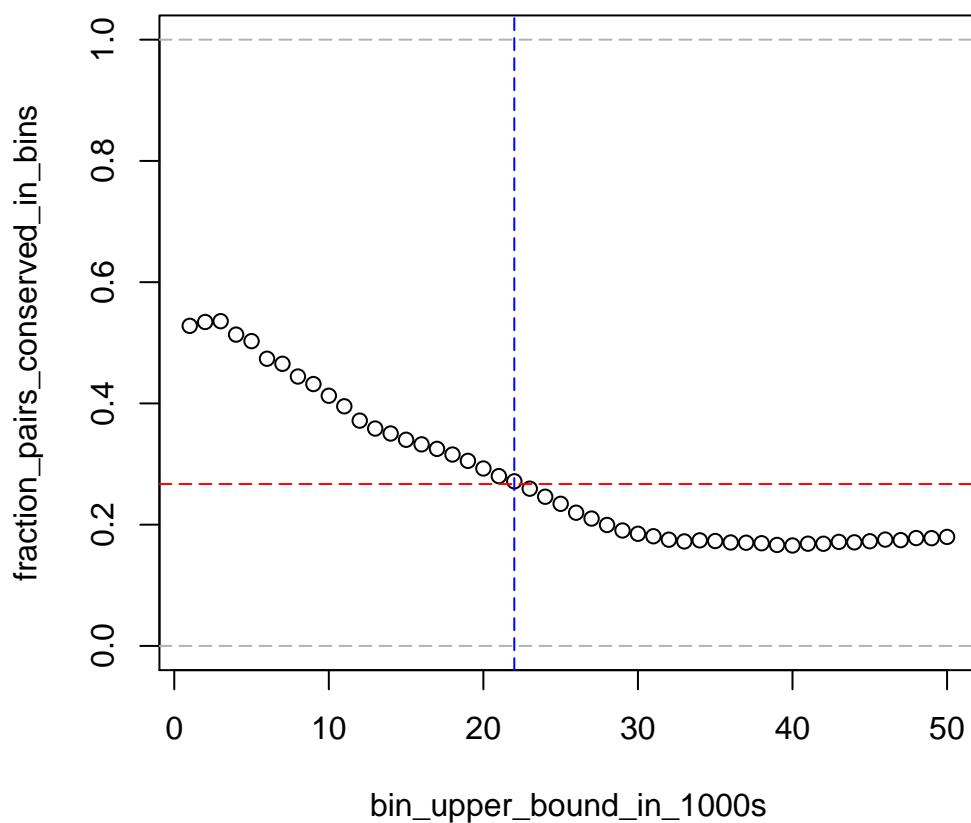

Supplement: s1 [file s1]

**Bin\_conservation\_minus\_bg\_MT325\_vs\_NYs-1**  
**PD-0.659585**

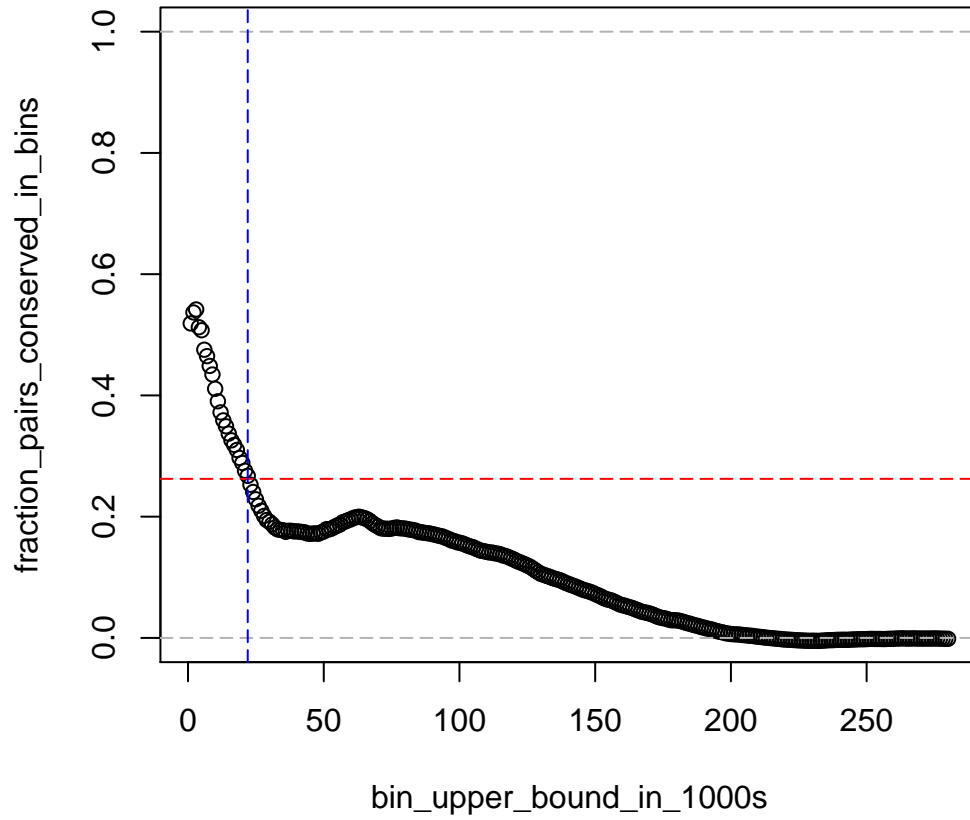

**Bin\_conservation\_minus\_bg\_MT325\_vs\_NYs-1**  
**PD-0.659585**

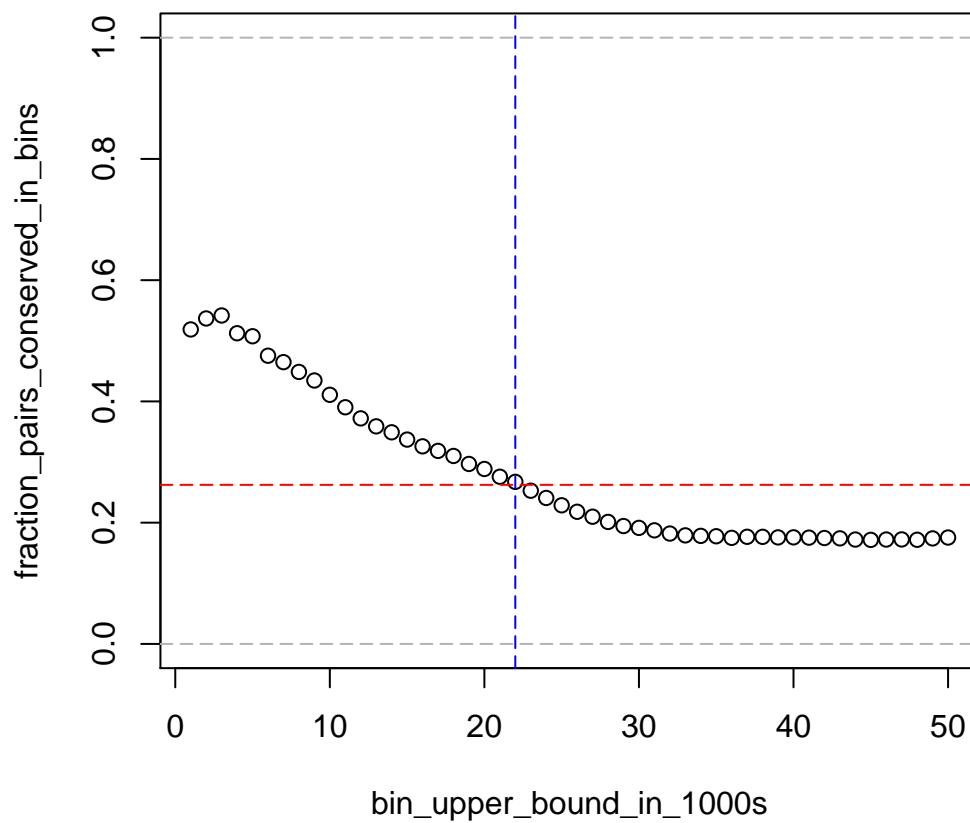

Supplement: s1 [file s1]

**Bin\_conservation\_minus\_bg\_NYs-1\_vs\_TN603.4.2**  
**PD-0.692309**

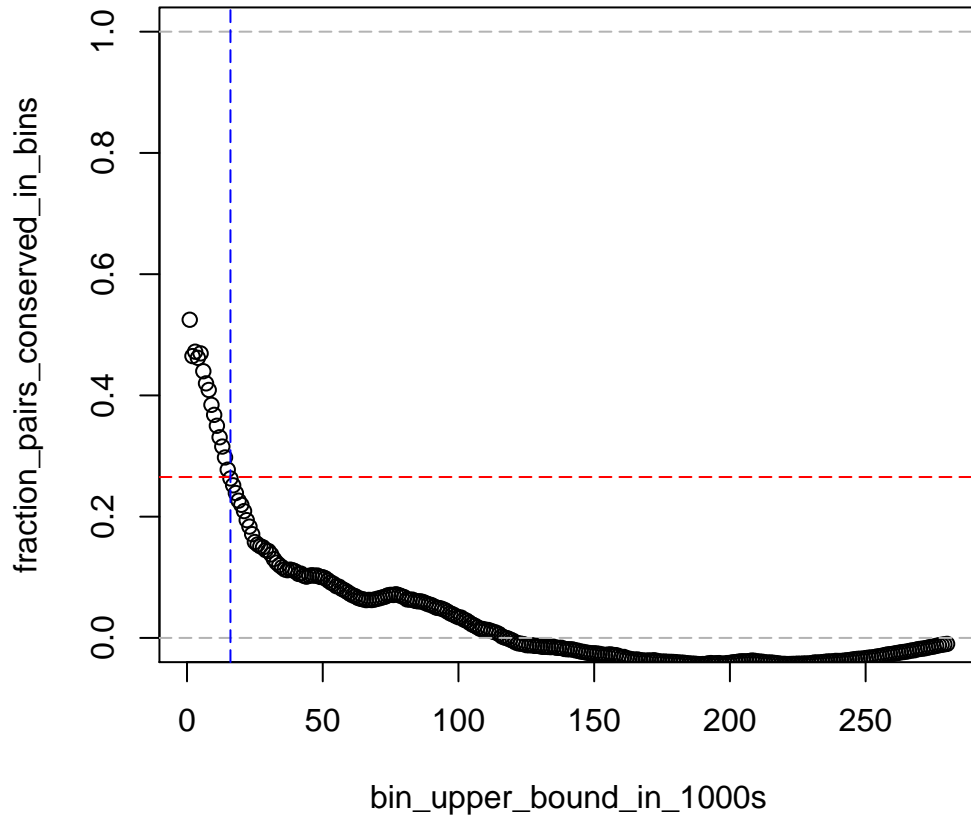

**Bin\_conservation\_minus\_bg\_NYs-1\_vs\_TN603.4.2**  
**PD-0.692309**

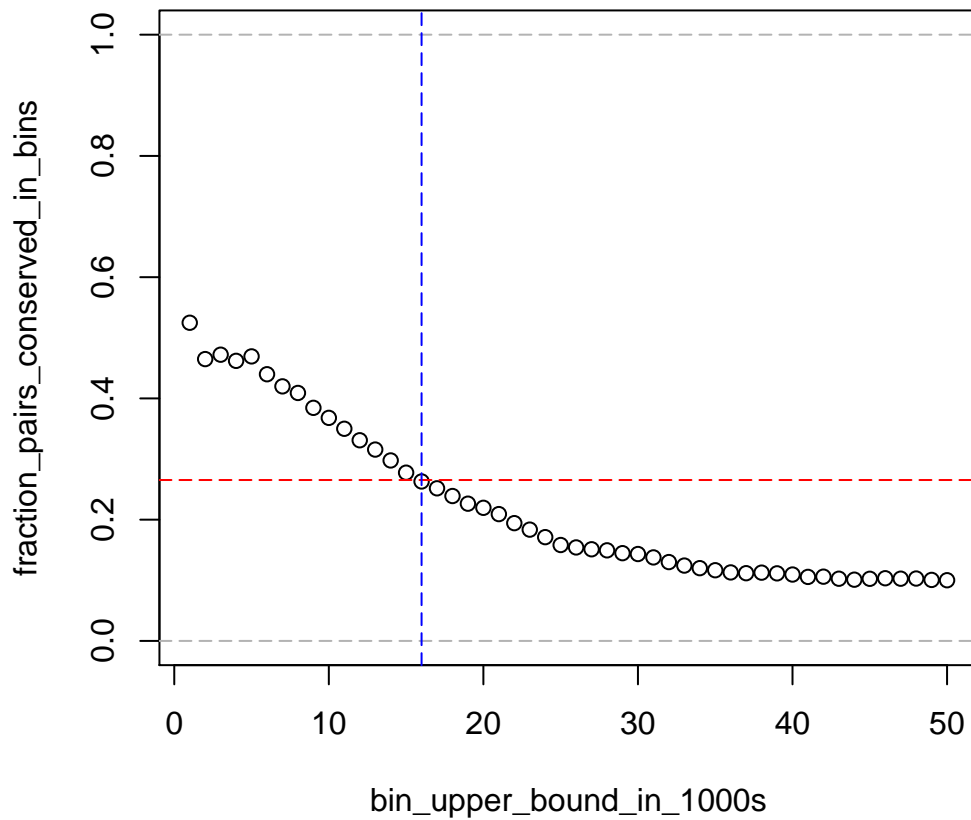

Supplement: s1 [file s1]

**Bin\_conservation\_minus\_bg\_ATCV1\_vs\_Can0610SP**  
**PD-0.014086**

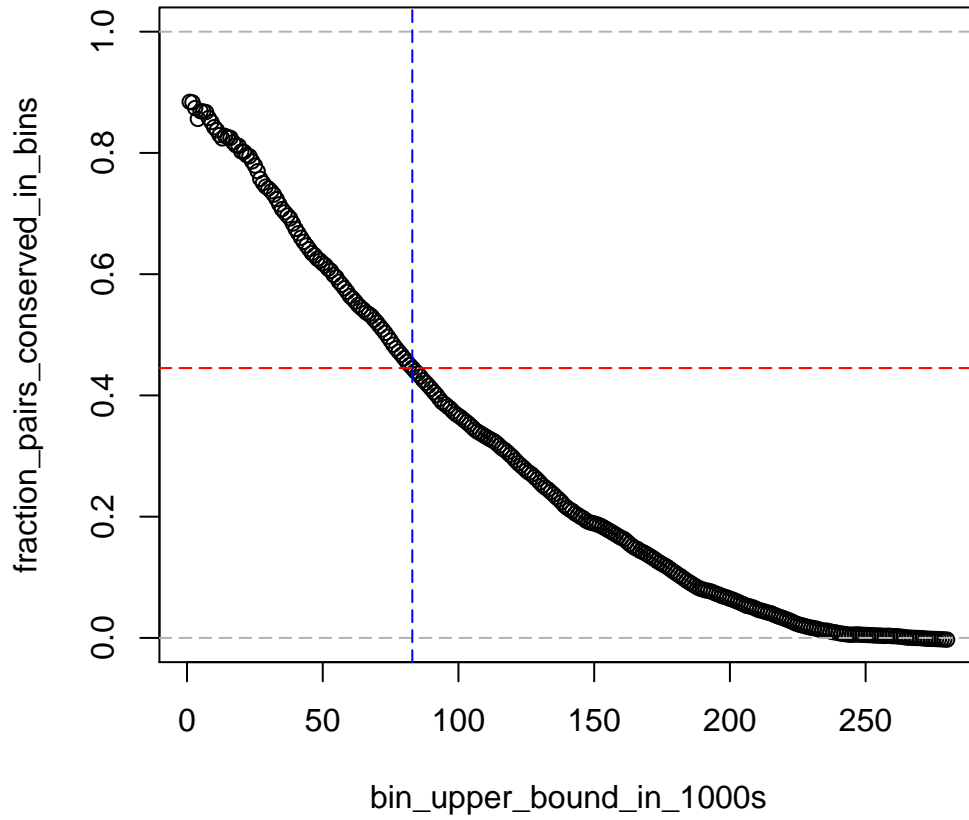

**Bin\_conservation\_minus\_bg\_ATCV1\_vs\_Can0610SP**  
**PD-0.014086**

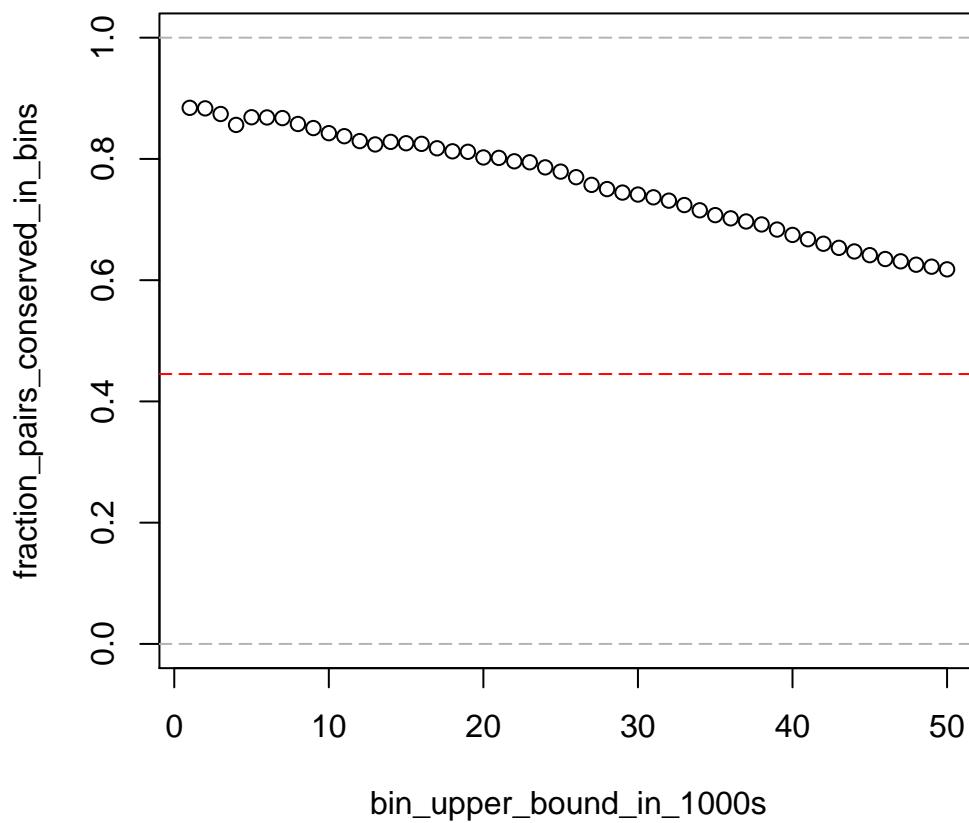

Supplement: s1 [file s1]

**Bin\_conservation\_minus\_bg\_CVA-1\_vs\_CviKI**  
**PD-0.649086**

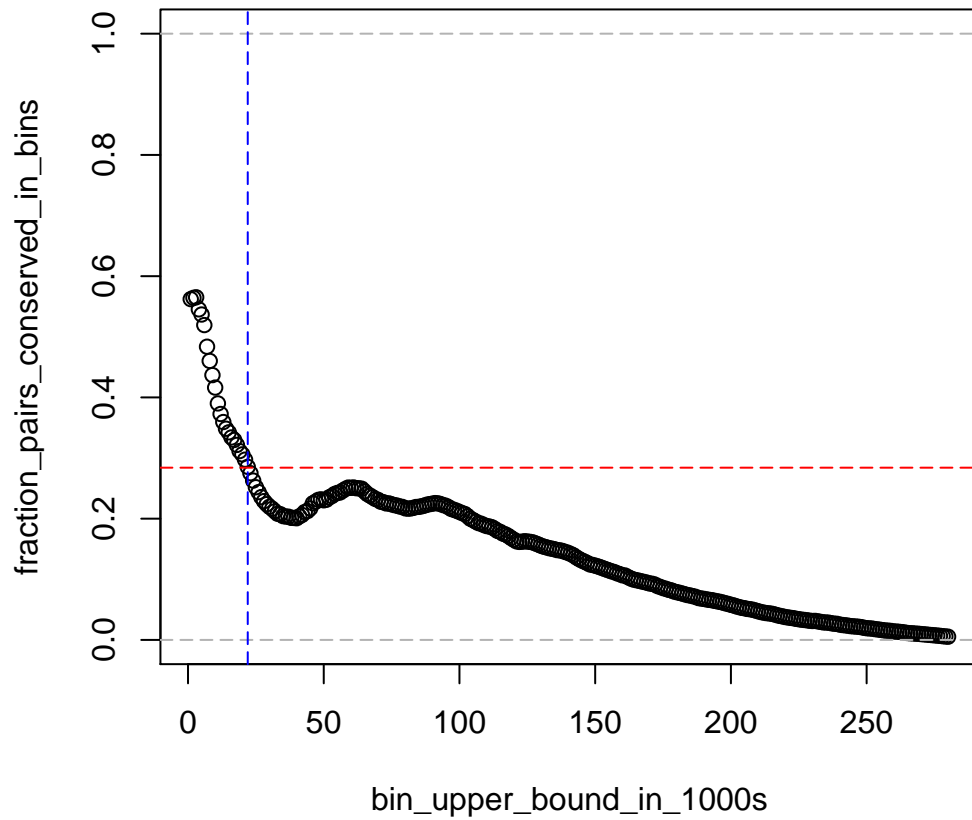

**Bin\_conservation\_minus\_bg\_CVA-1\_vs\_CviKI**  
**PD-0.649086**

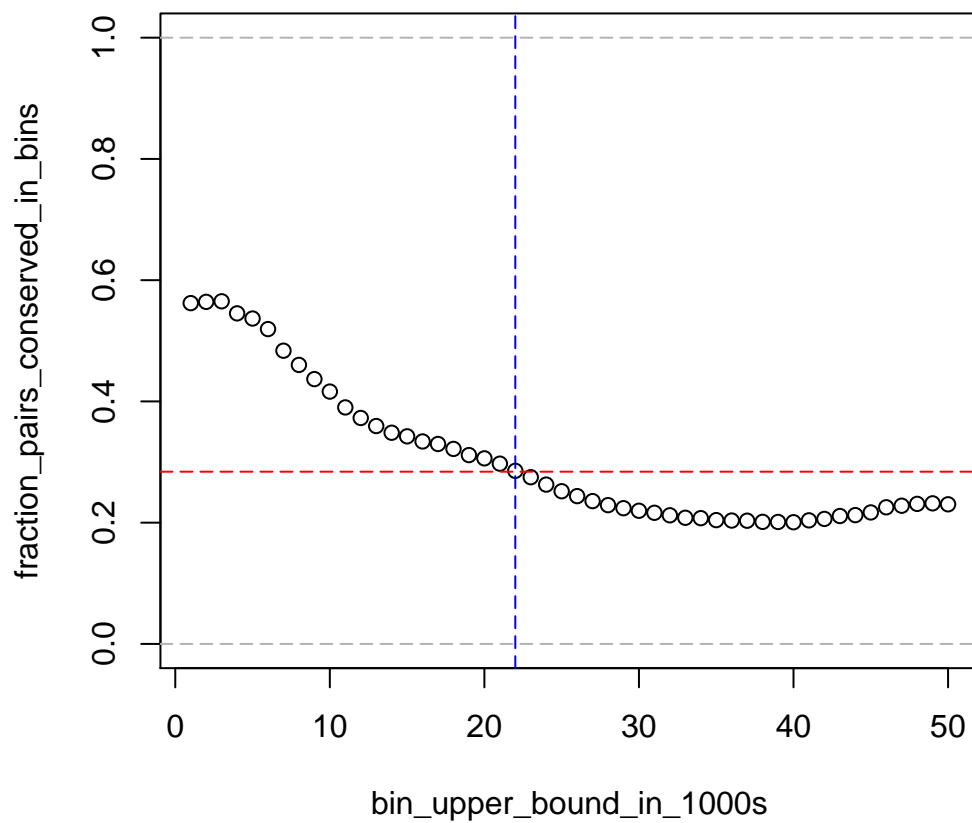

Supplement: s1 [file s1]

**Bin\_conservation\_minus\_bg\_GM0701.1\_vs\_NY-2B**  
**PD-0.695072**

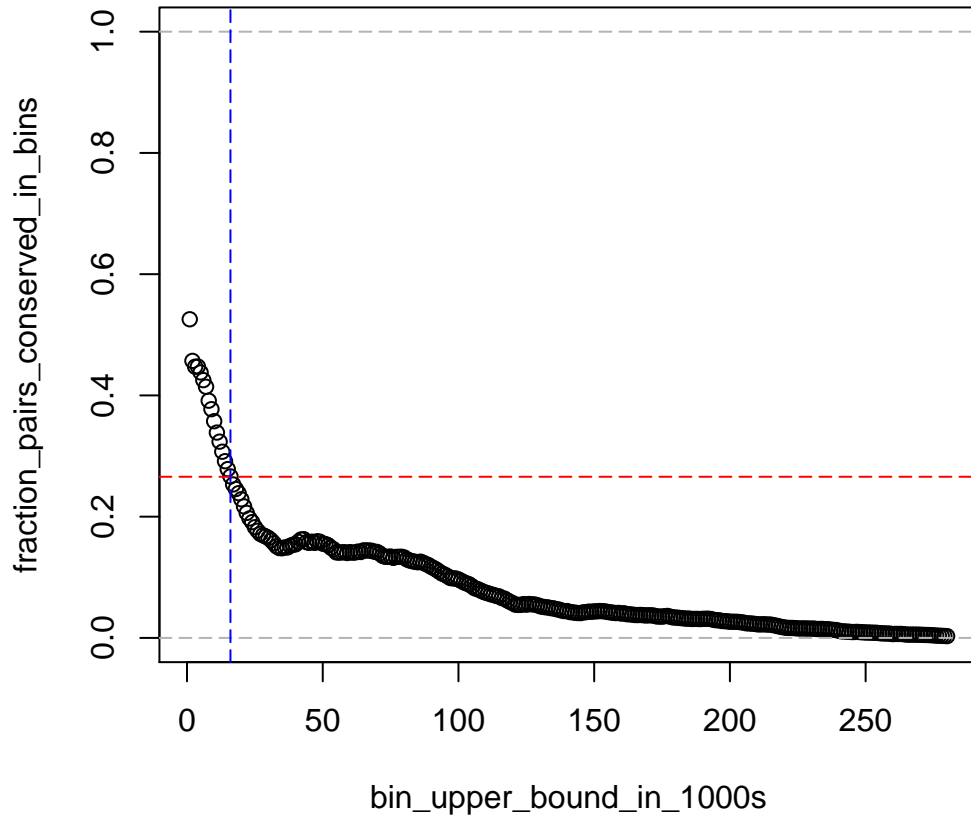

**Bin\_conservation\_minus\_bg\_GM0701.1\_vs\_NY-2B**  
**PD-0.695072**

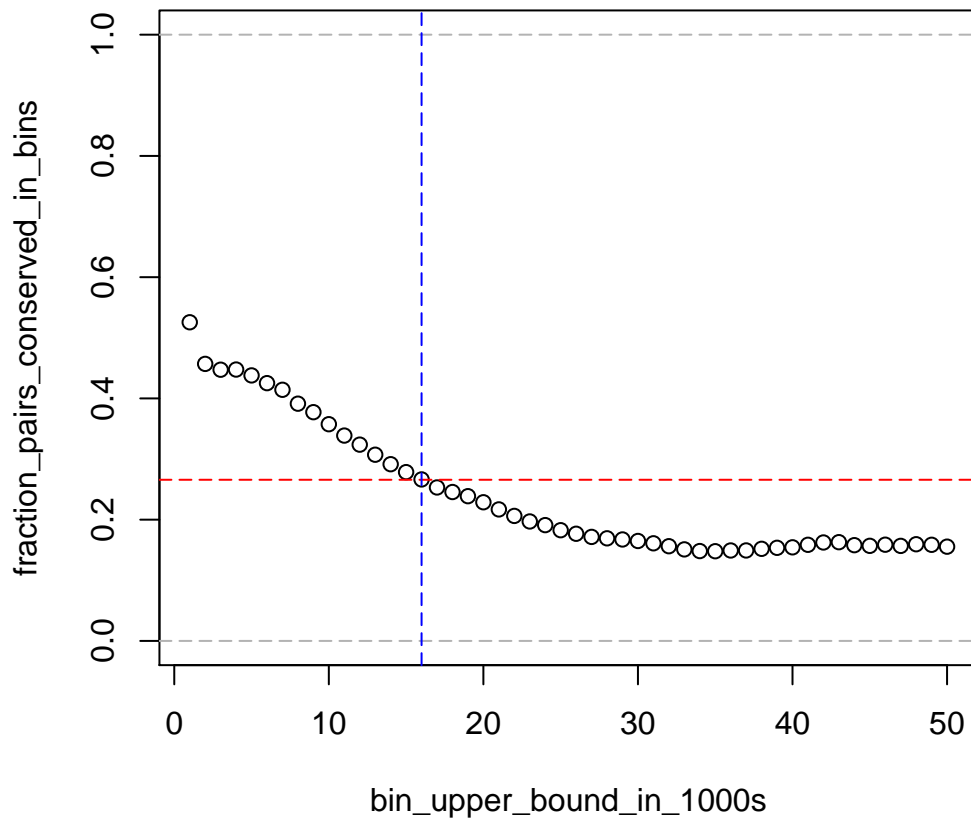

Supplement: s1 [file s1]

**Bin\_conservation\_minus\_bg\_OR0704.2.2\_vs\_WI0606**  
**PD-0.463409**

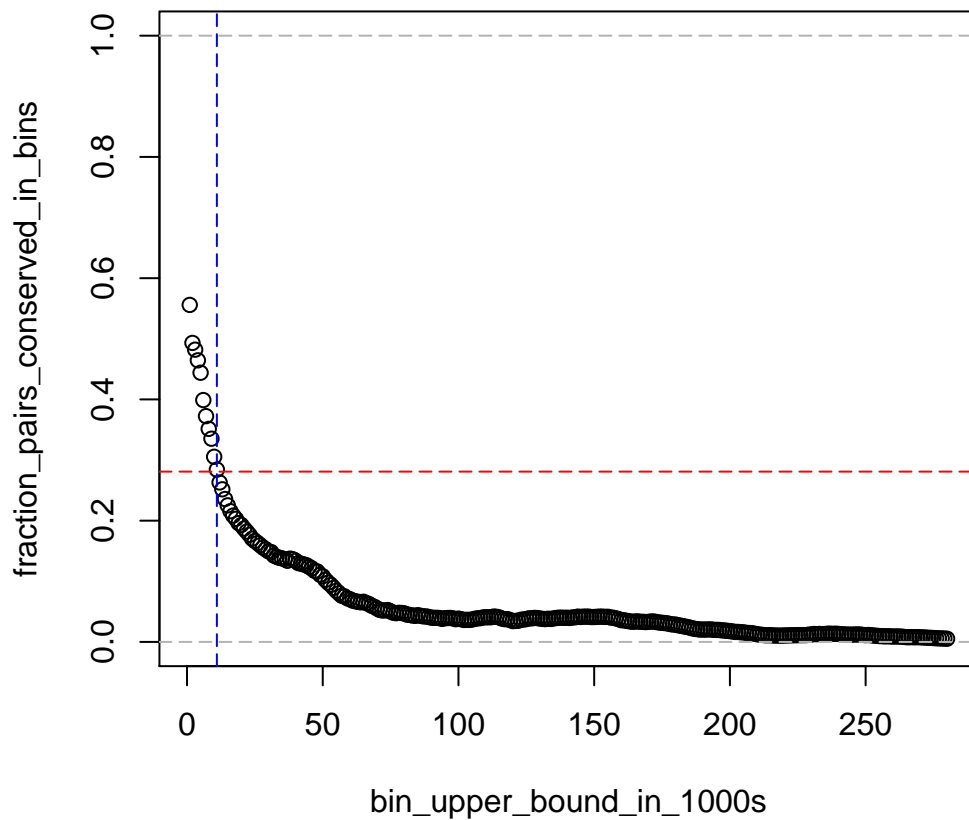

**Bin\_conservation\_minus\_bg\_OR0704.2.2\_vs\_WI0606**  
**PD-0.463409**

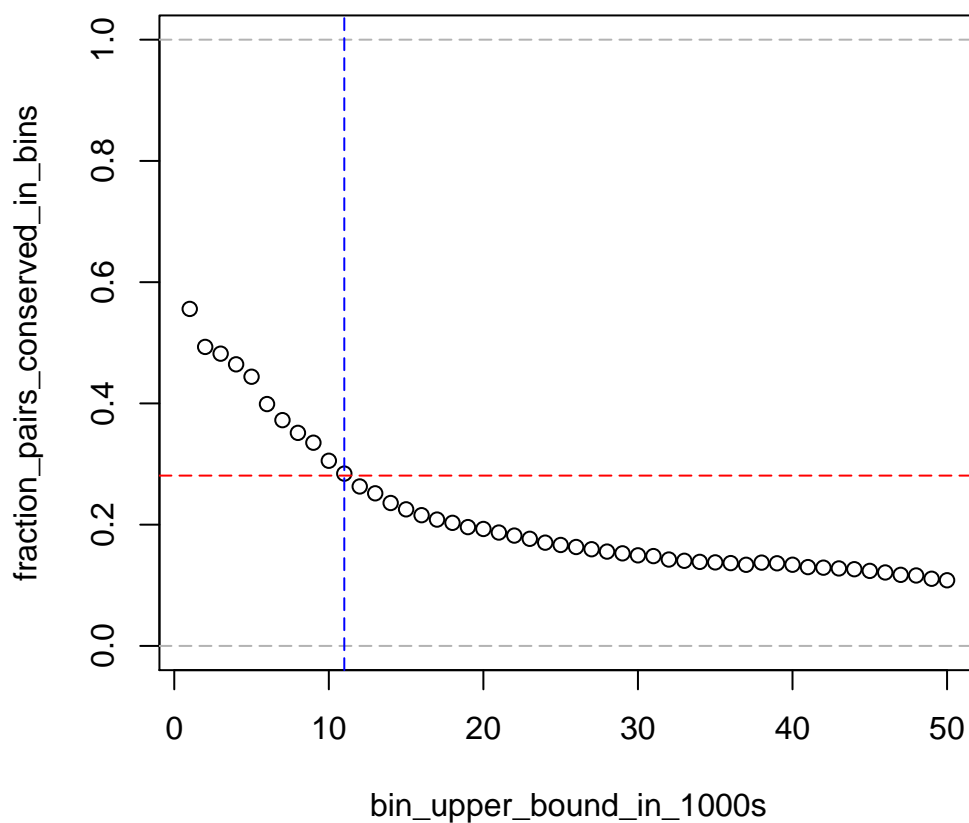

Supplement: s1 [file s1]

**Bin\_conservation\_minus\_bg\_CVM-1\_vs\_CvsA1**  
**PD-0.651914**

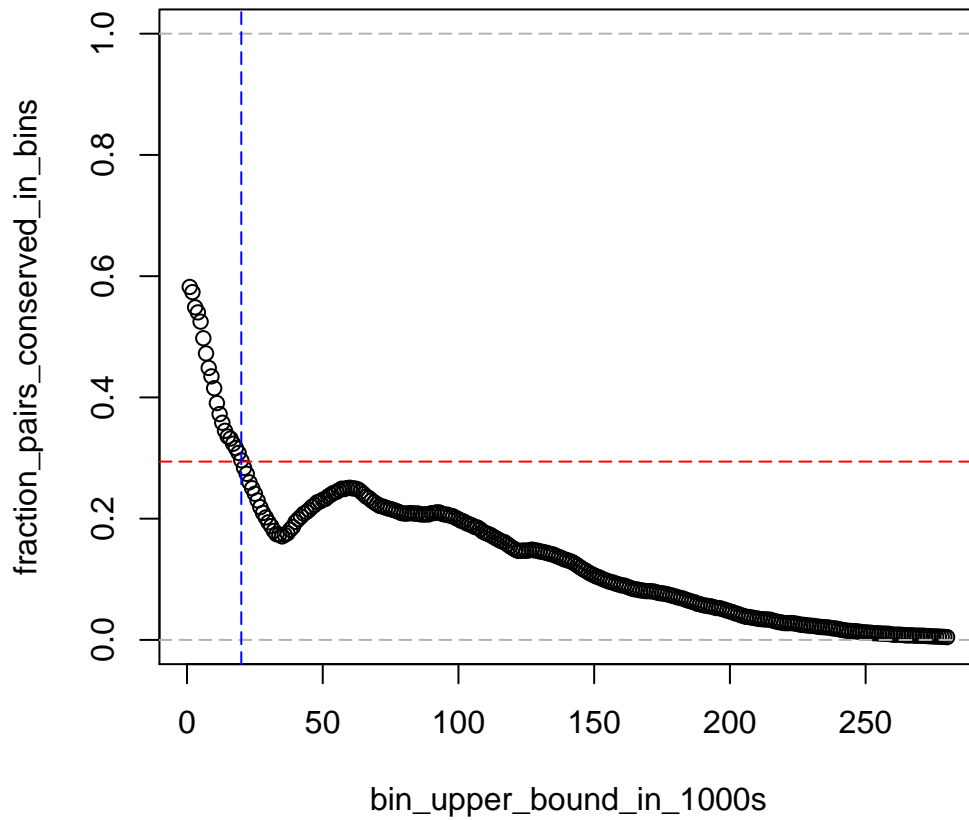

**Bin\_conservation\_minus\_bg\_CVM-1\_vs\_CvsA1**  
**PD-0.651914**

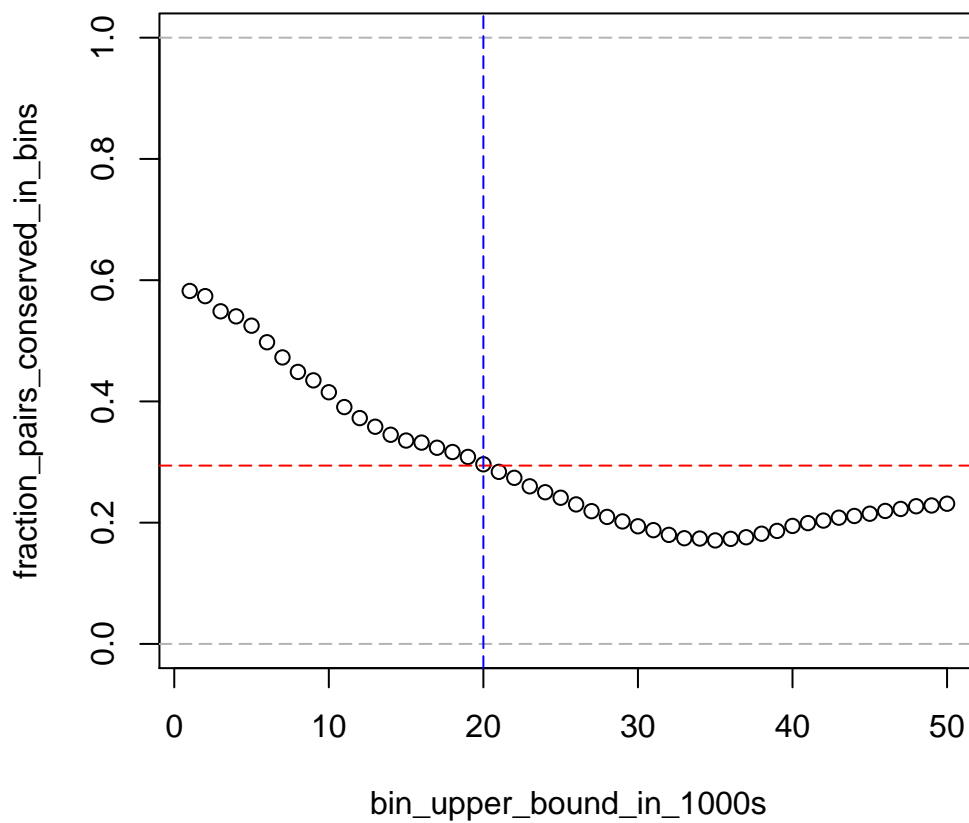

Supplement: s1 [file s1]

**Bin\_conservation\_minus\_bg\_FR483\_vs\_KS1B**  
**PD-0.656377**

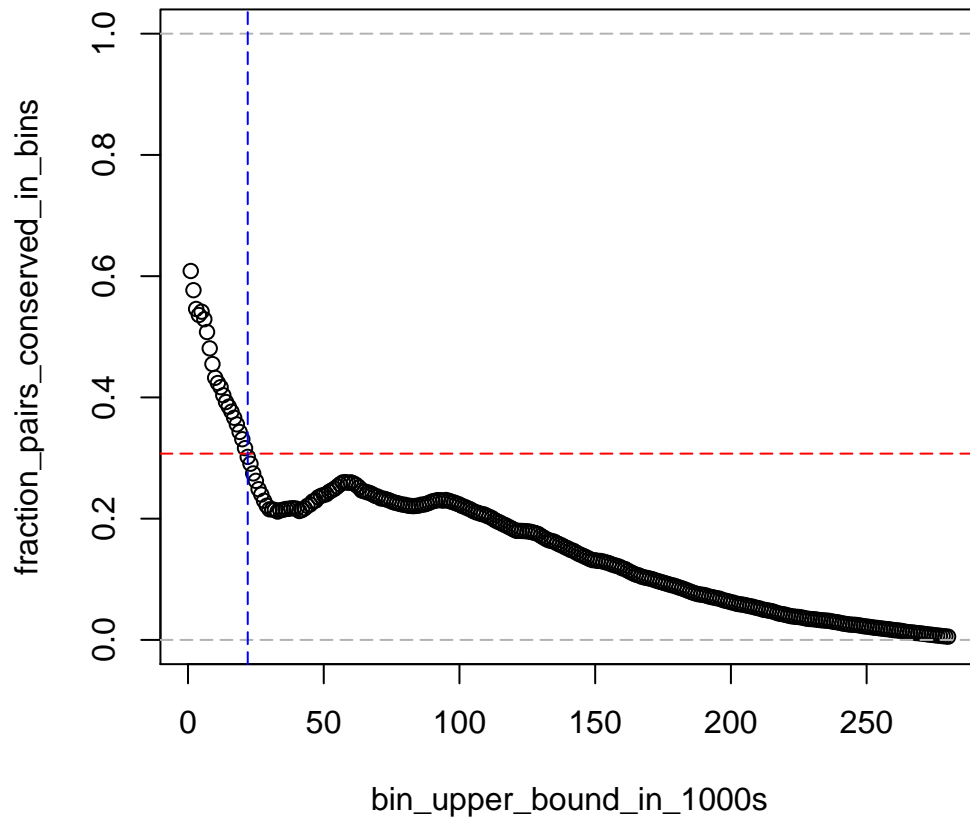

**Bin\_conservation\_minus\_bg\_FR483\_vs\_KS1B**  
**PD-0.656377**

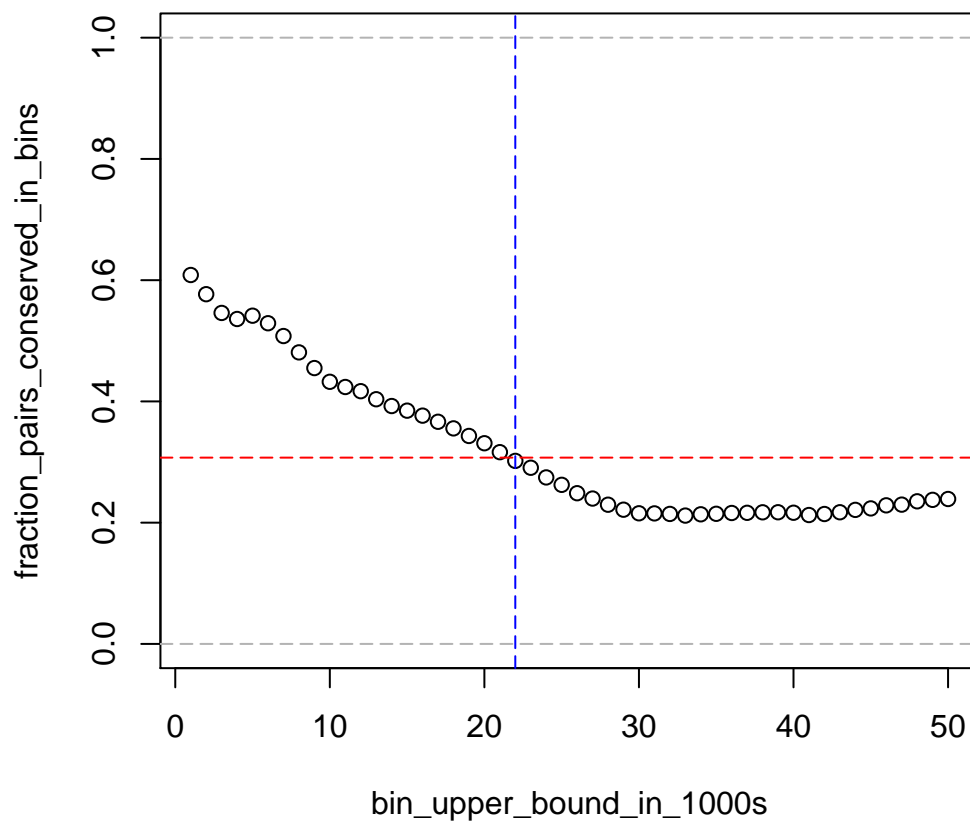

Supplement: s1 [file s1]

**Bin\_conservation\_minus\_bg\_OR0704.3\_vs\_TN603.4.2**  
**PD-0.062018**

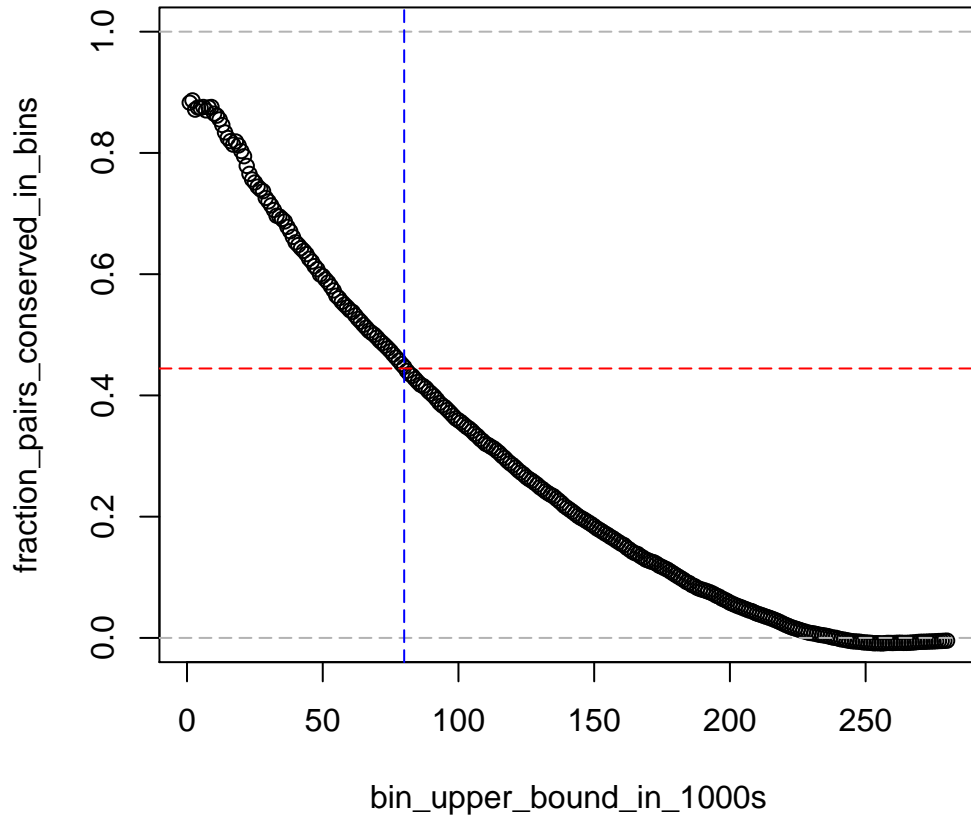

**Bin\_conservation\_minus\_bg\_OR0704.3\_vs\_TN603.4.2**  
**PD-0.062018**

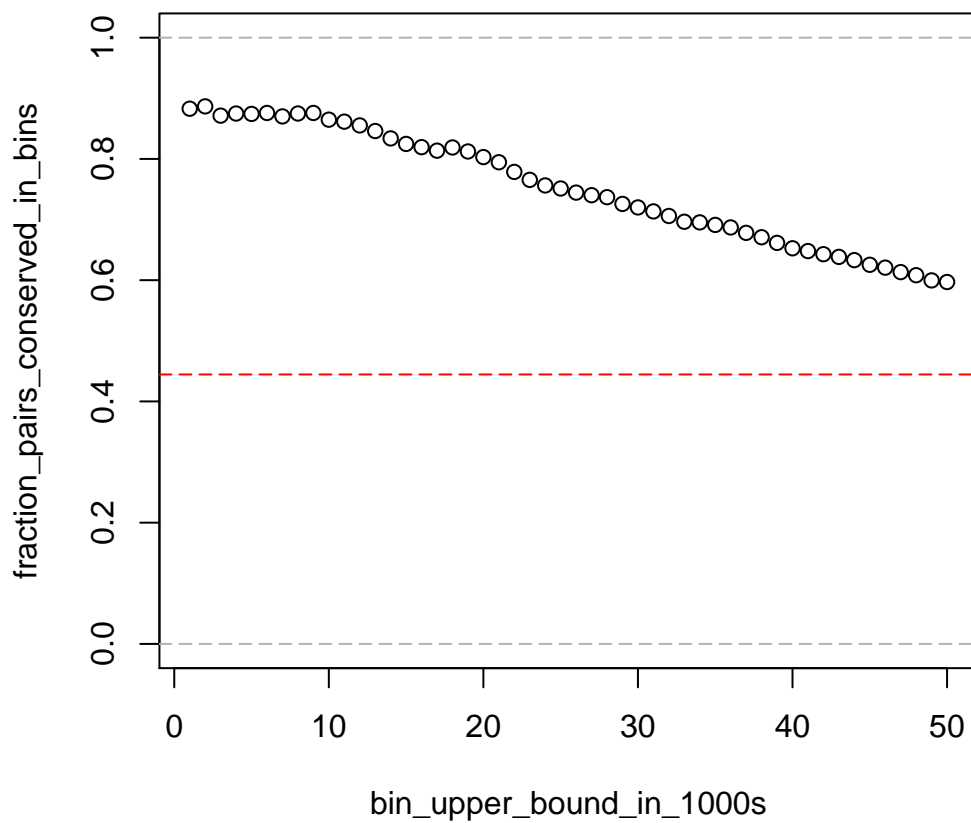

Supplement: s1 [file s1]

**Bin\_conservation\_minus\_bg\_MO0605SPH\_vs\_NE-JV-4**  
**PD-0.685173**

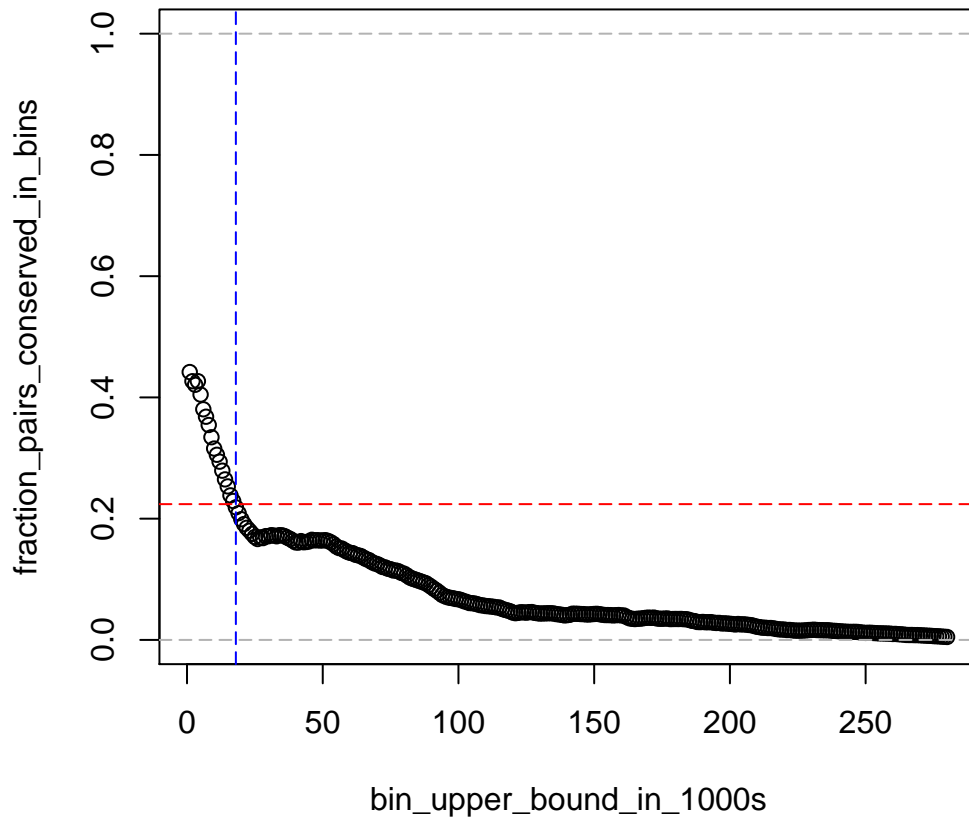

**Bin\_conservation\_minus\_bg\_MO0605SPH\_vs\_NE-JV-4**  
**PD-0.685173**

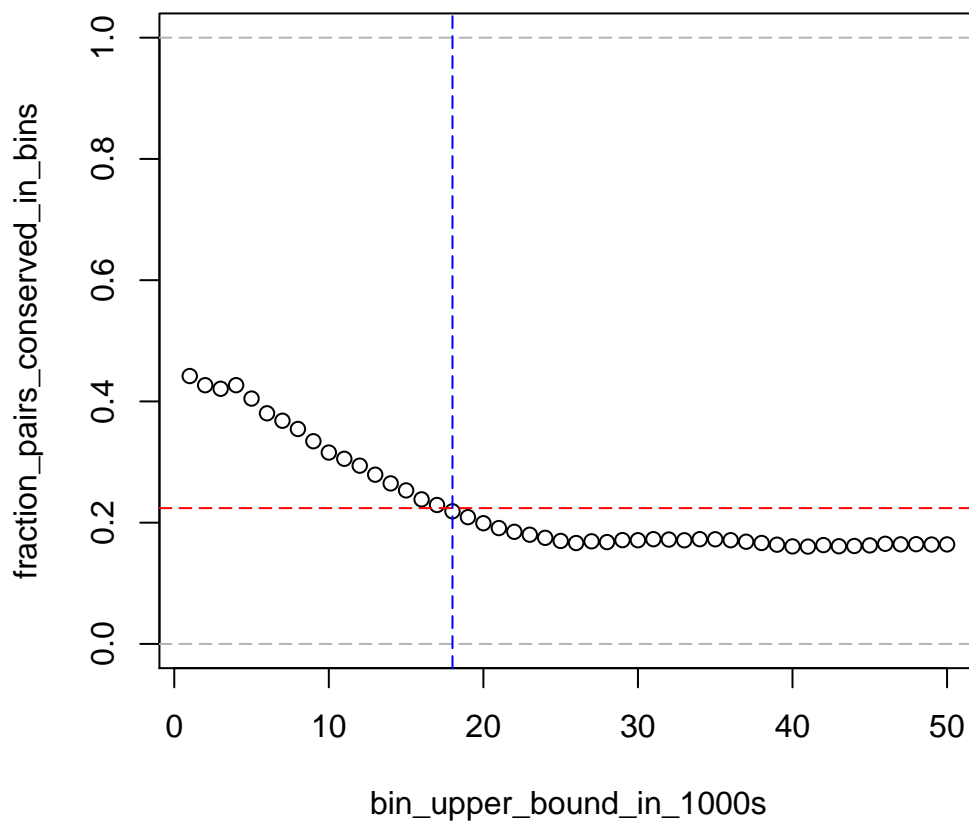

Supplement: s1 [file s1]

**Bin\_conservation\_minus\_bg\_CVB-1\_vs\_IL-3A**  
**PD-0.654975**

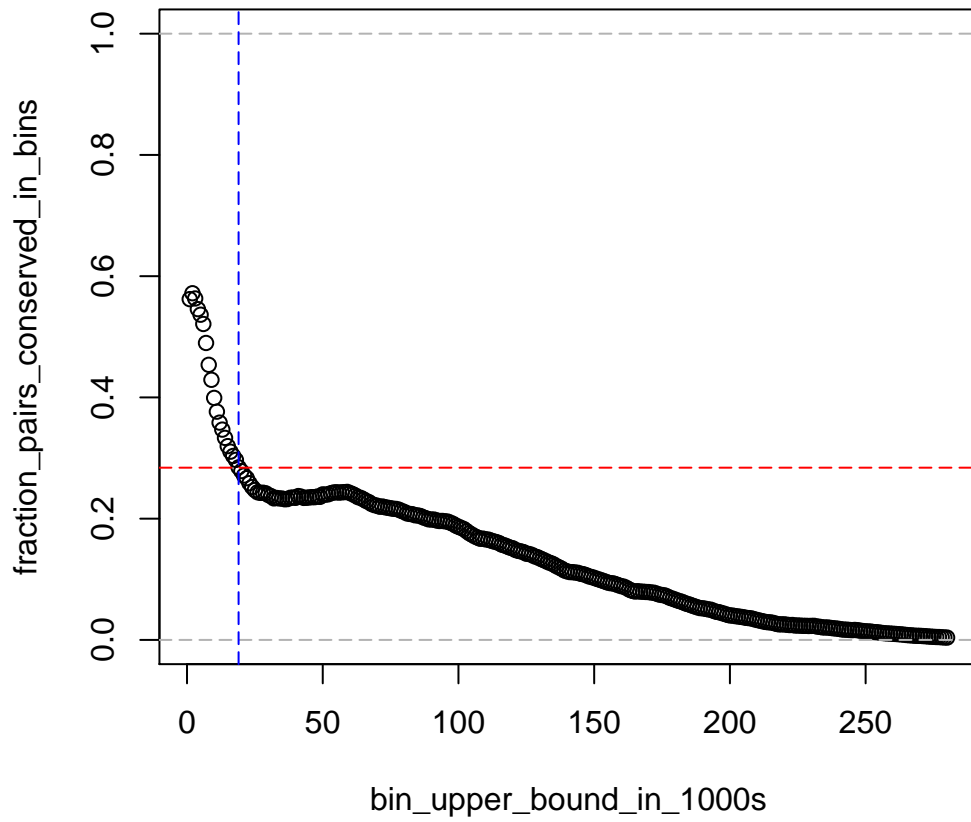

**Bin\_conservation\_minus\_bg\_CVB-1\_vs\_IL-3A**  
**PD-0.654975**

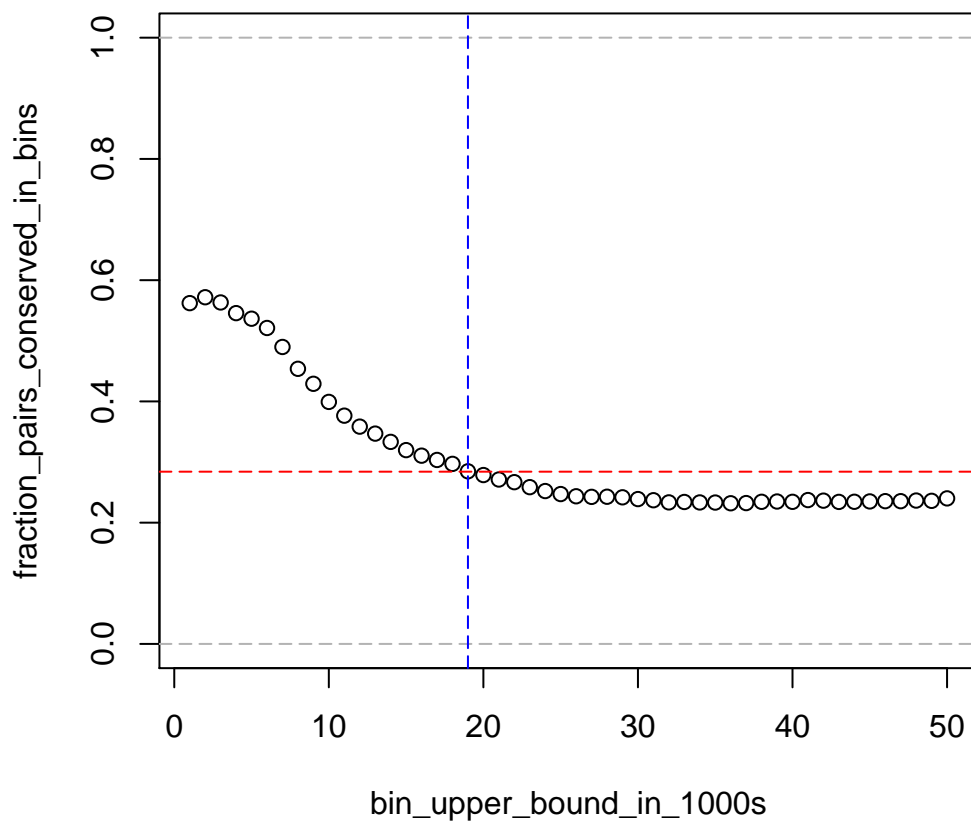

Supplement: s1 [file s1]

**Bin\_conservation\_minus\_bg\_NY2A\_vs\_PBCV1**  
**PD-0.137346**

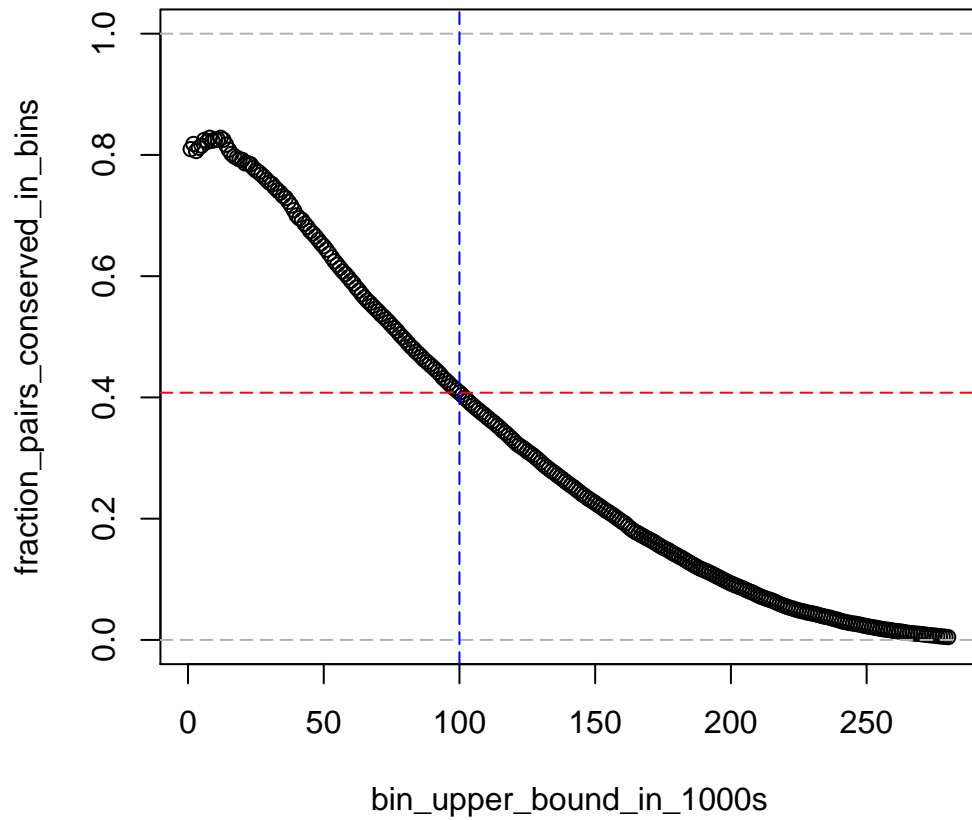

**Bin\_conservation\_minus\_bg\_NY2A\_vs\_PBCV1**  
**PD-0.137346**

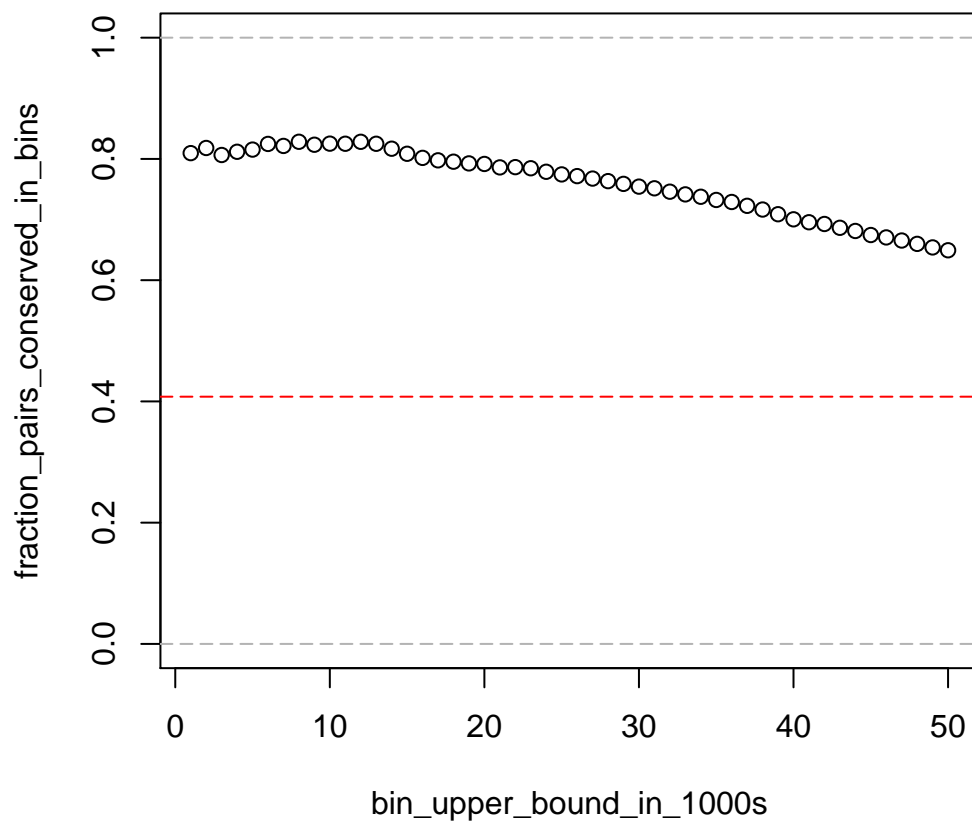

Supplement: s1 [file s1]

**Bin\_conservation\_minus\_bg\_Br0604L\_vs\_NW665.2**  
**PD-0.452498**

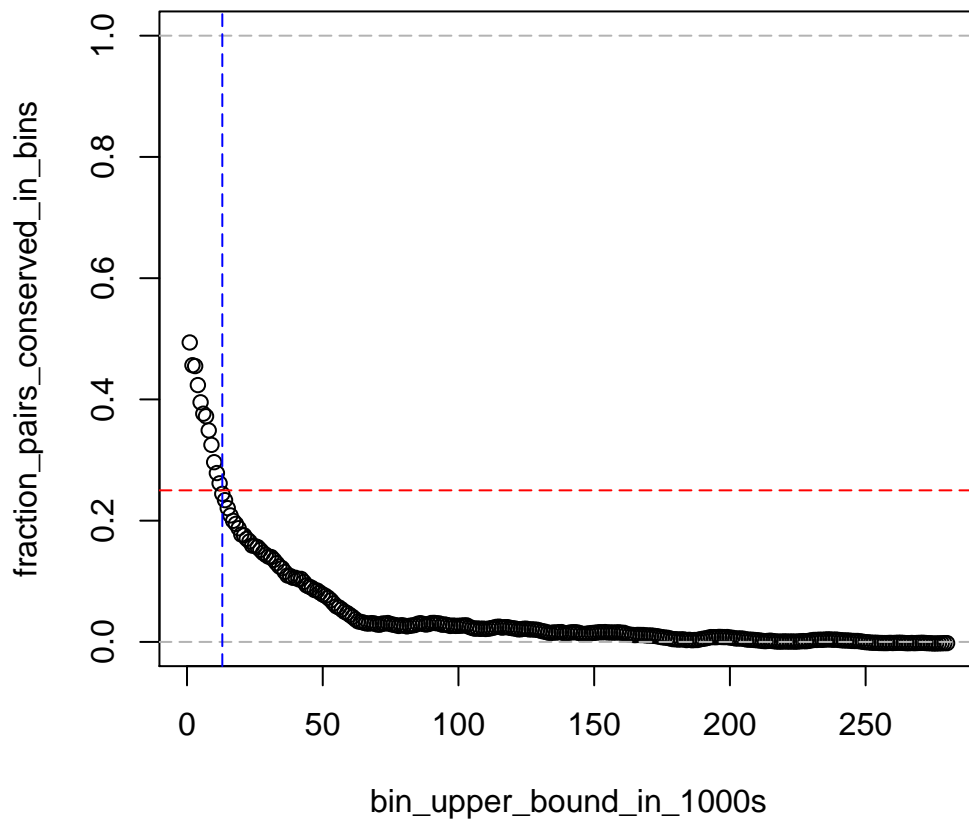

**Bin\_conservation\_minus\_bg\_Br0604L\_vs\_NW665.2**  
**PD-0.452498**

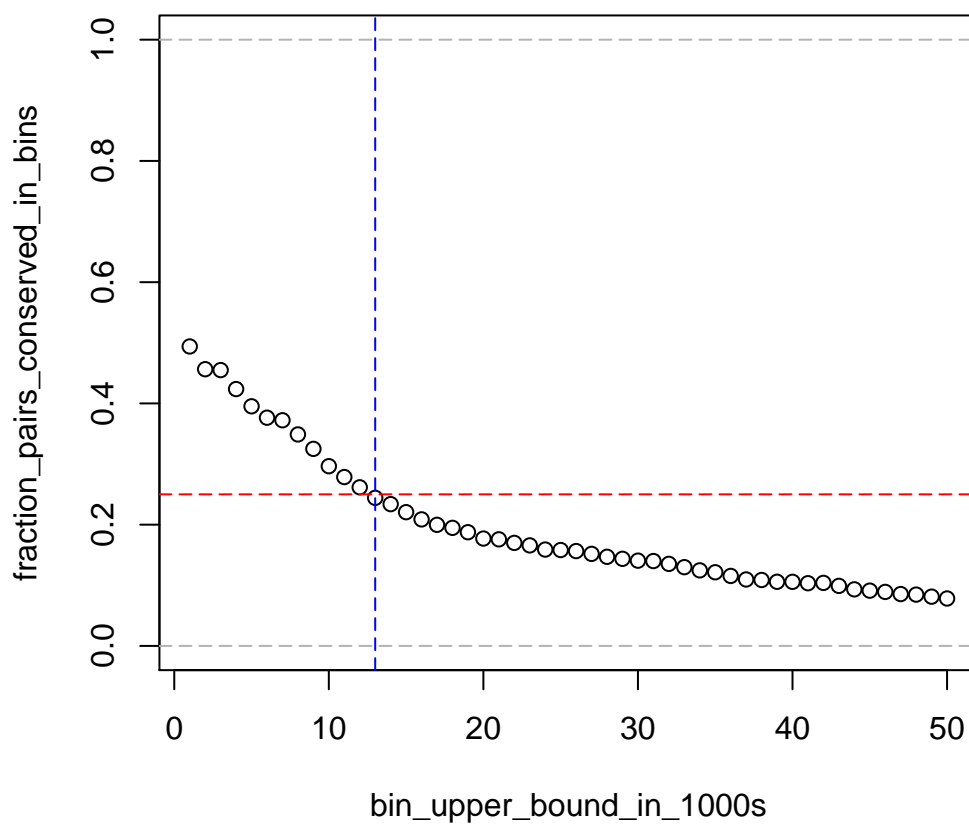

Supplement: s1 [file s1]

**Bin\_conservation\_minus\_bg\_CVA-1\_vs\_CVM-1**  
**PD-0.009417**

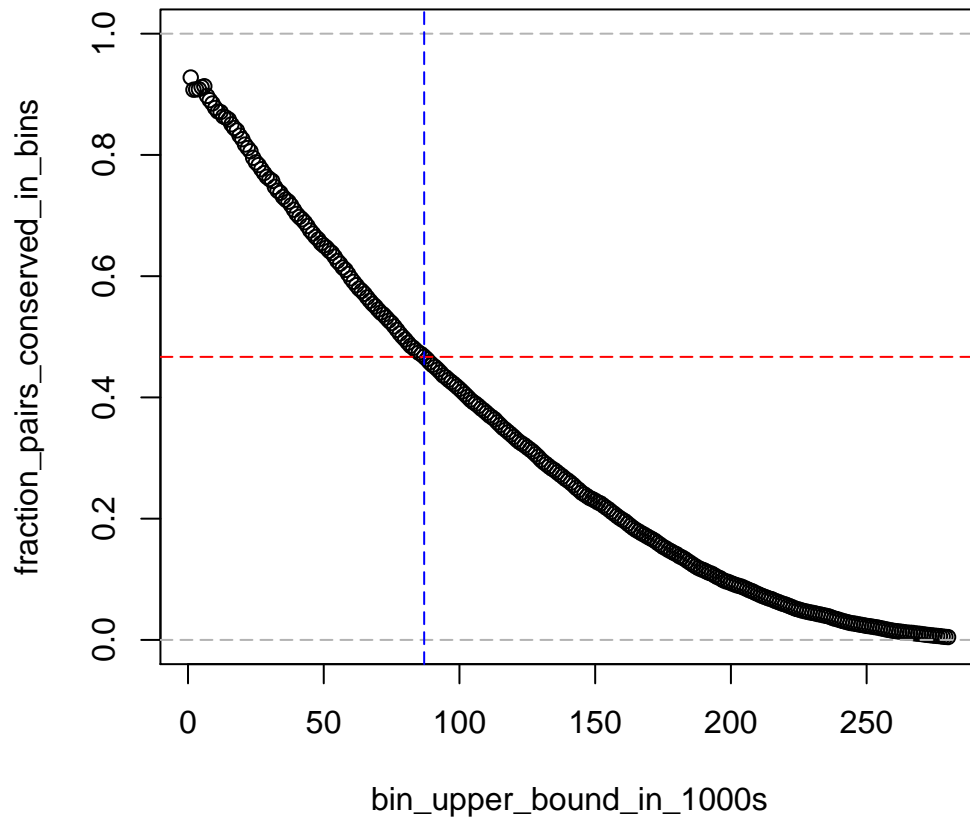

**Bin\_conservation\_minus\_bg\_CVA-1\_vs\_CVM-1**  
**PD-0.009417**

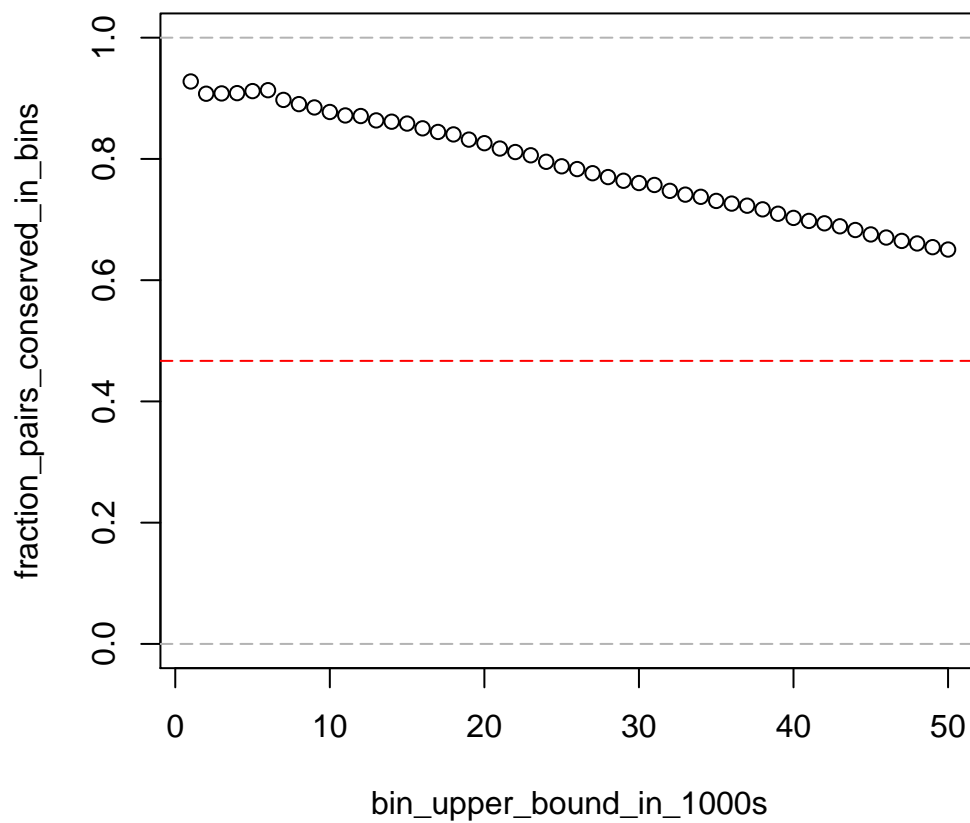

Supplement: s1 [file s1]

**Bin\_conservation\_minus\_bg\_Can0610SP\_vs\_TN603.4.2**  
**PD-0.062008**

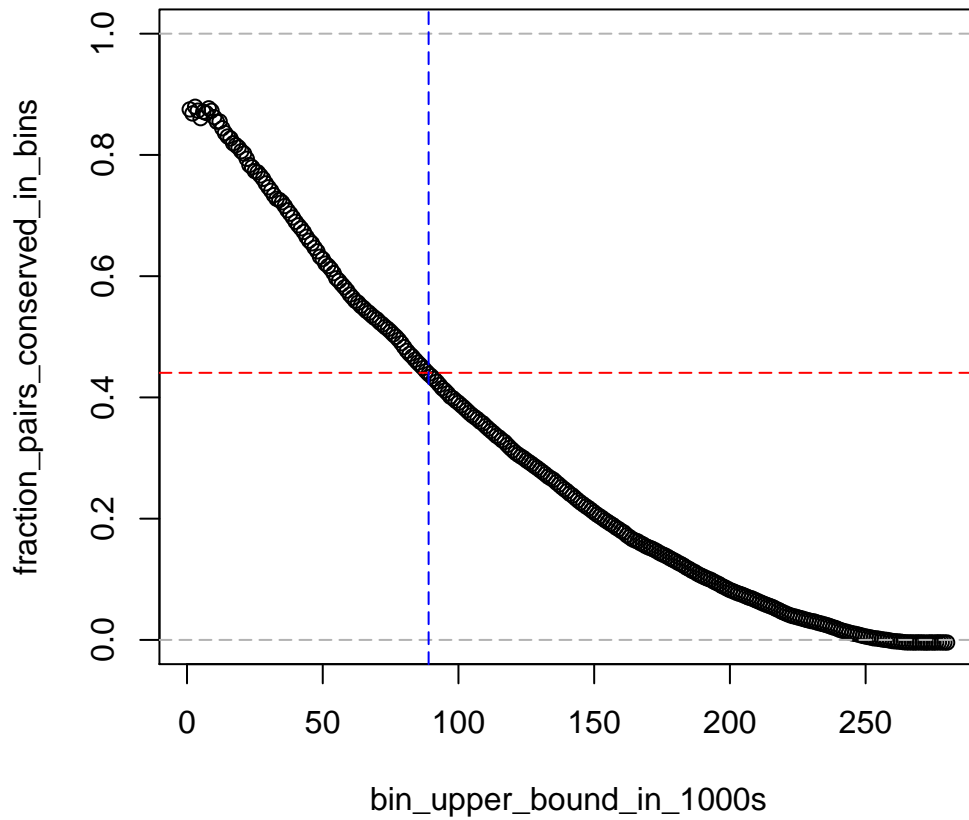

**Bin\_conservation\_minus\_bg\_Can0610SP\_vs\_TN603.4.2**  
**PD-0.062008**

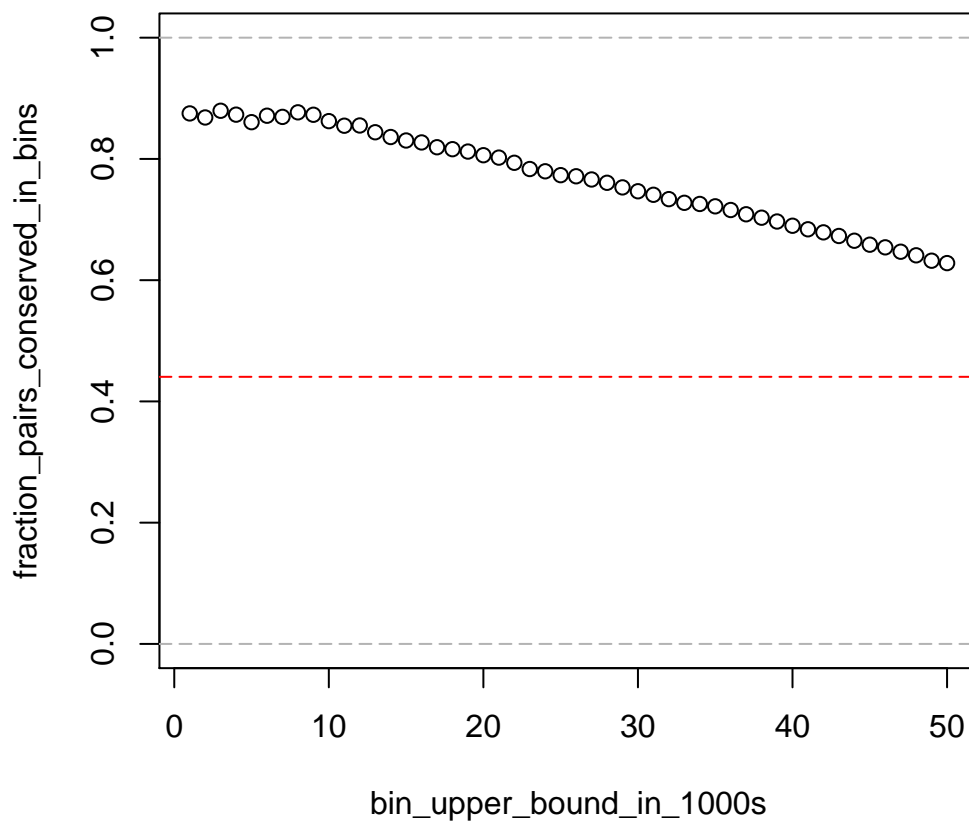

Supplement: s1 [file s1]

**Bin\_conservation\_minus\_bg\_CVR-1\_vs\_KS1B**  
**PD-0.648901**

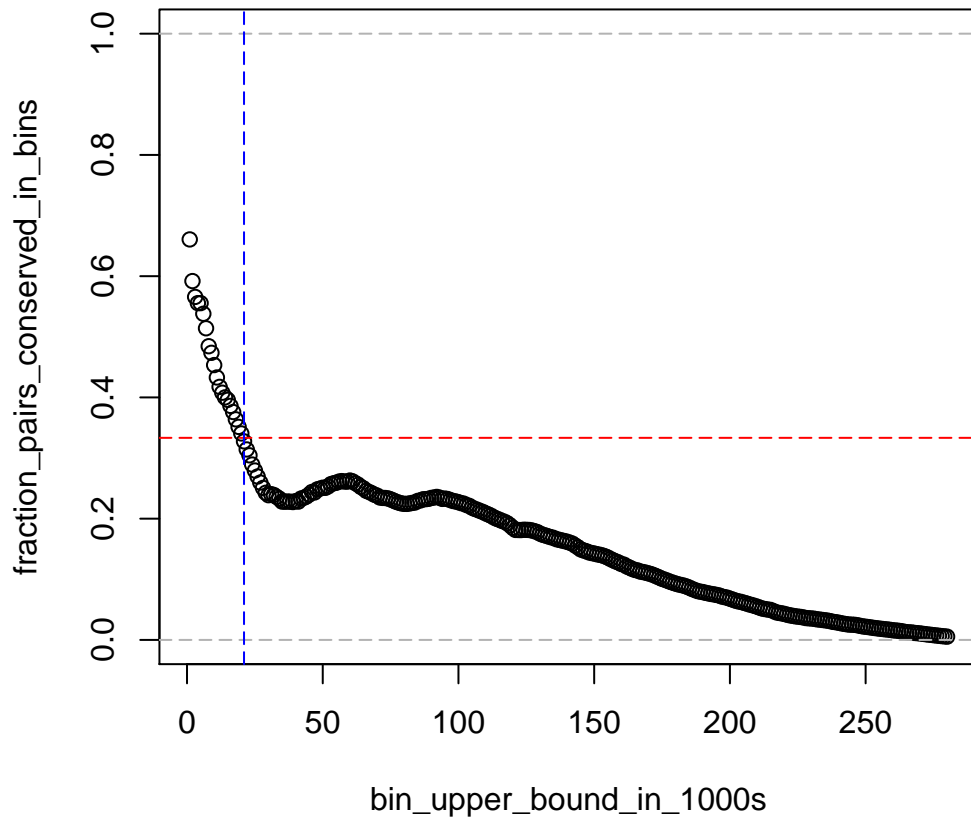

**Bin\_conservation\_minus\_bg\_CVR-1\_vs\_KS1B**  
**PD-0.648901**

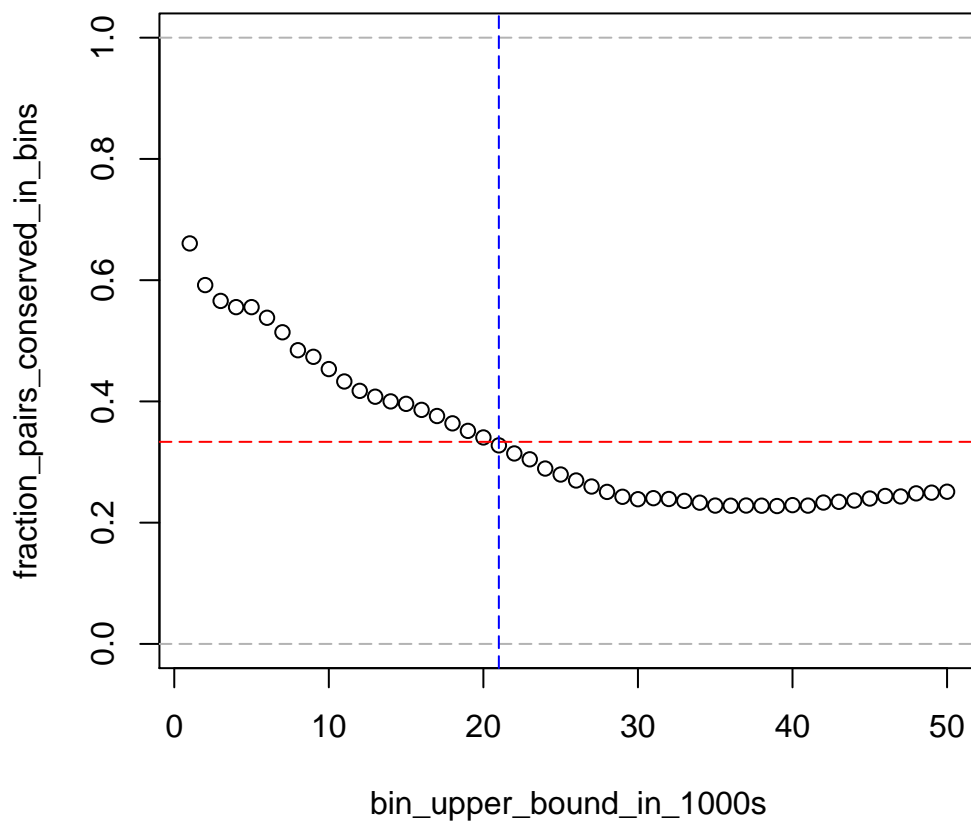

Supplement: s1 [file s1]

**Bin\_conservation\_minus\_bg\_CviKI\_vs\_NYs-1**  
**PD-0.146904**

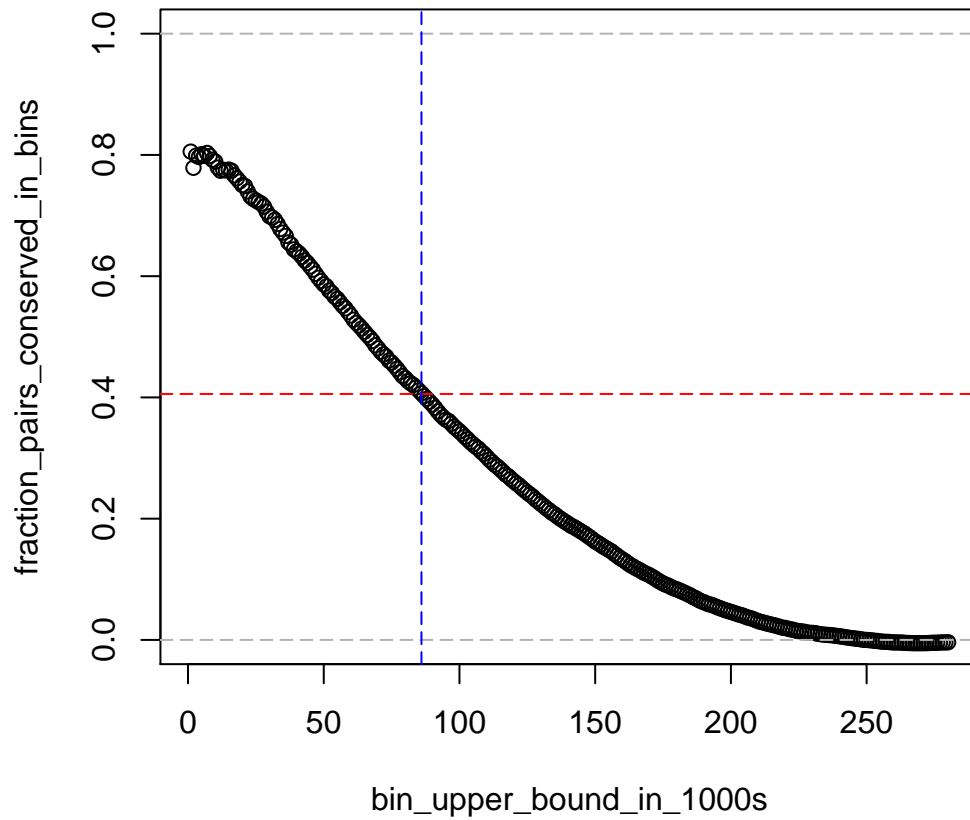

**Bin\_conservation\_minus\_bg\_CviKI\_vs\_NYs-1**  
**PD-0.146904**

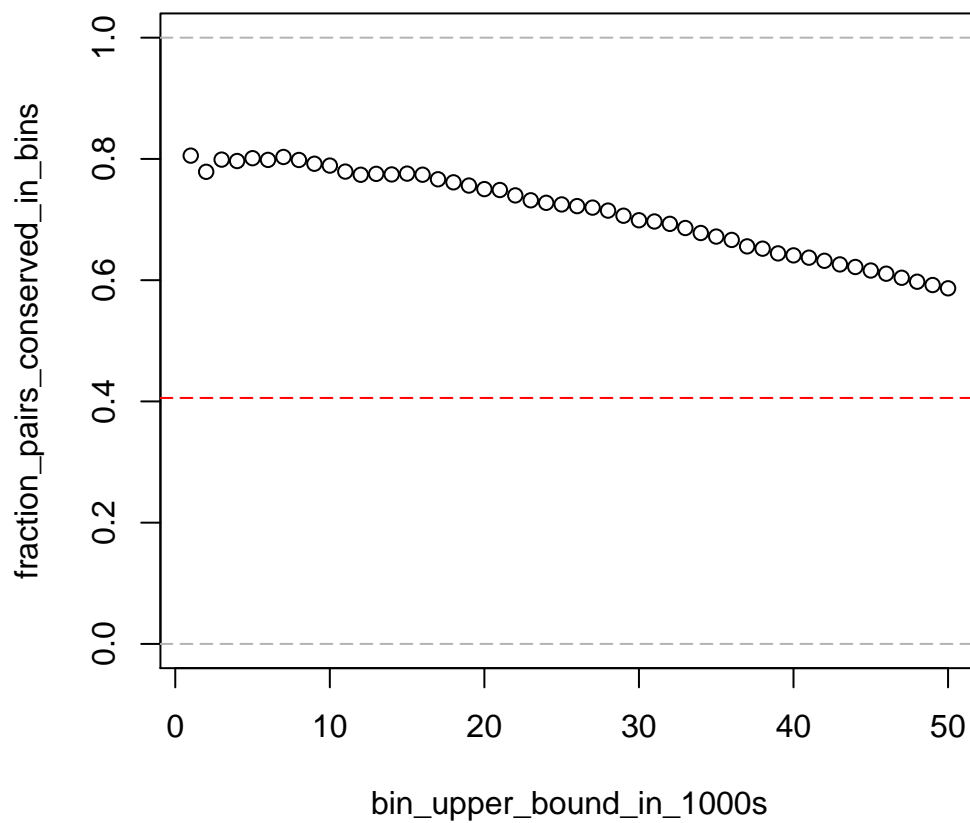

Supplement: s1 [file s1]

**Bin\_conservation\_minus\_bg\_MO0605SPH\_vs\_NYs-1**  
**PD-0.706166**

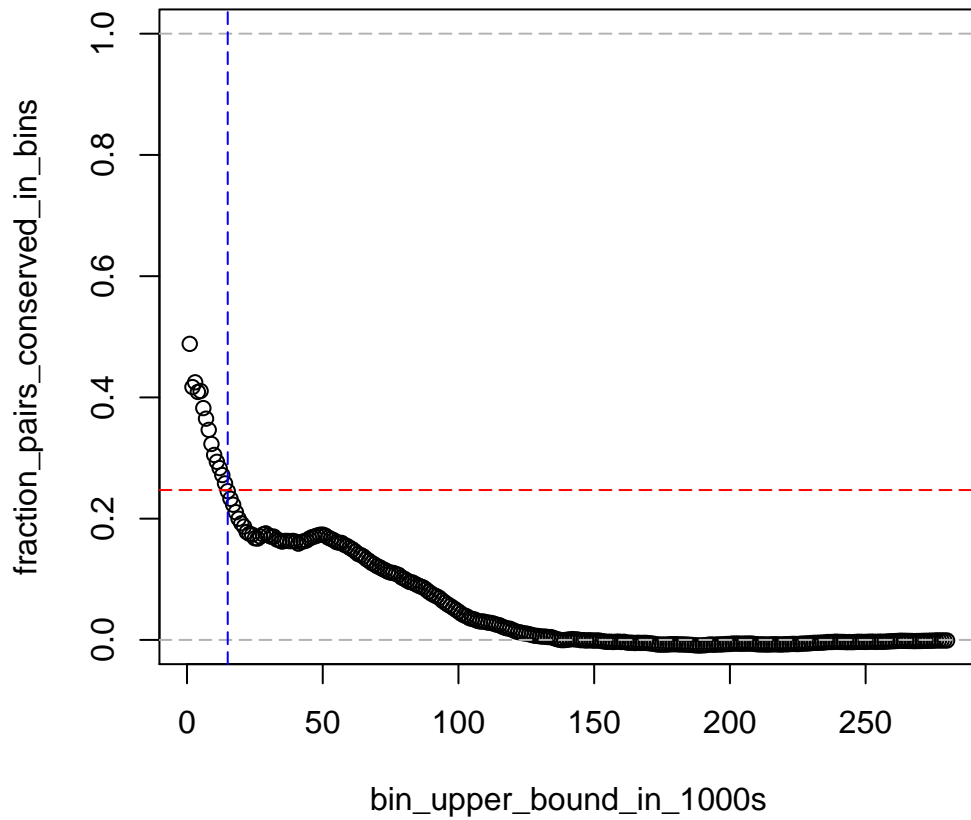

**Bin\_conservation\_minus\_bg\_MO0605SPH\_vs\_NYs-1**  
**PD-0.706166**

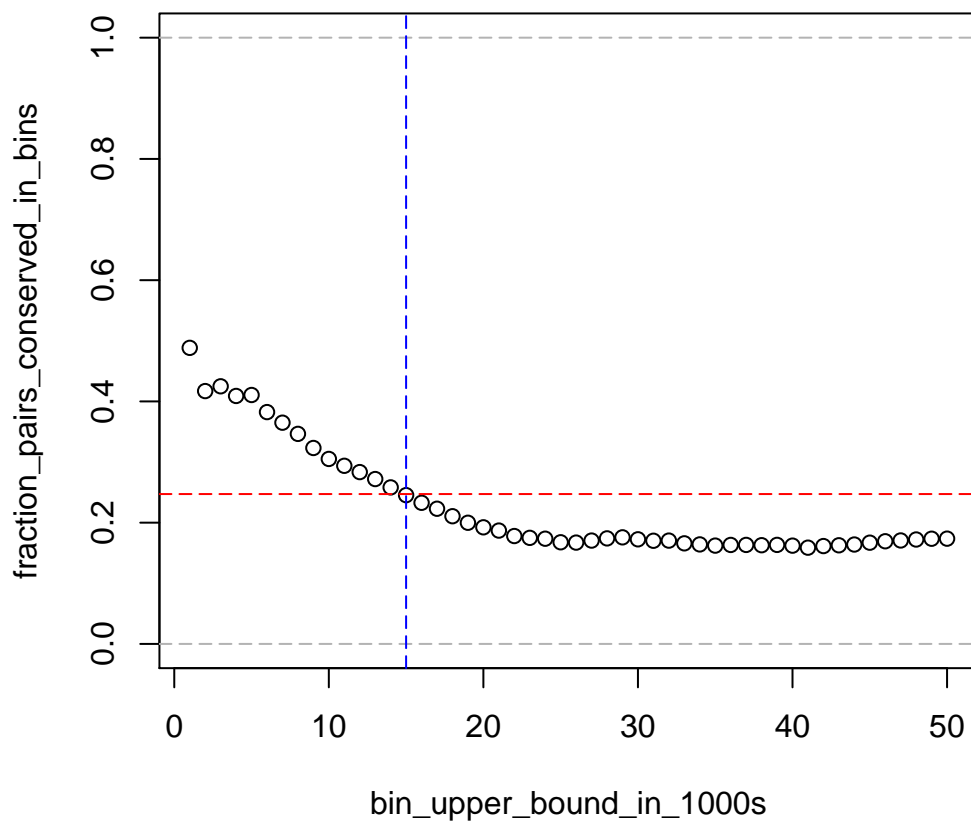

Supplement: s1 [file s1]

**Bin\_conservation\_minus\_bg\_AR158\_vs\_CVA-1**  
**PD-0.660928**

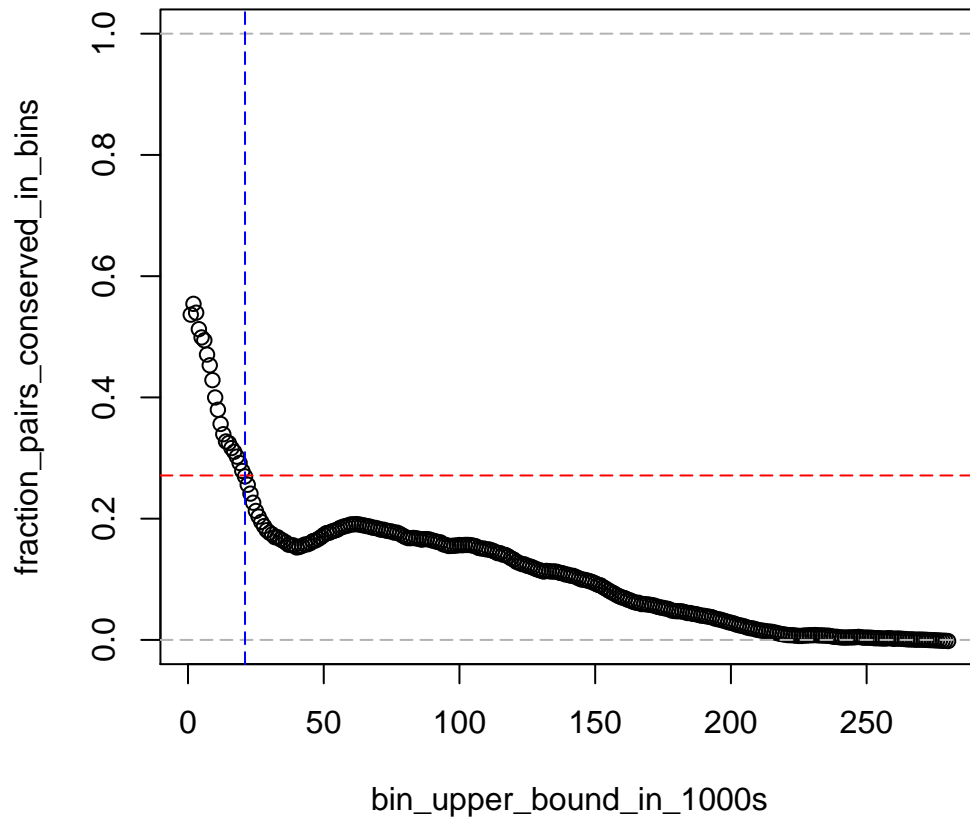

**Bin\_conservation\_minus\_bg\_AR158\_vs\_CVA-1**  
**PD-0.660928**

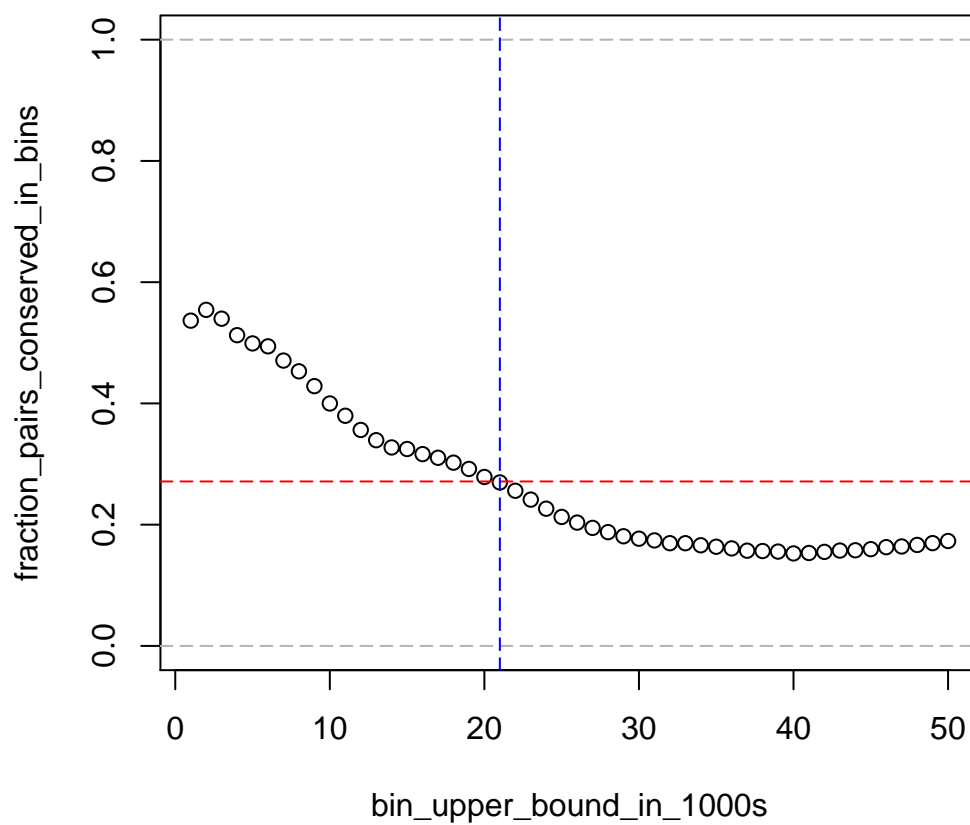

Supplement: s1 [file s1]

**Bin\_conservation\_minus\_bg\_MA-1D\_vs\_NE-JV-1**  
**PD-0.692633**

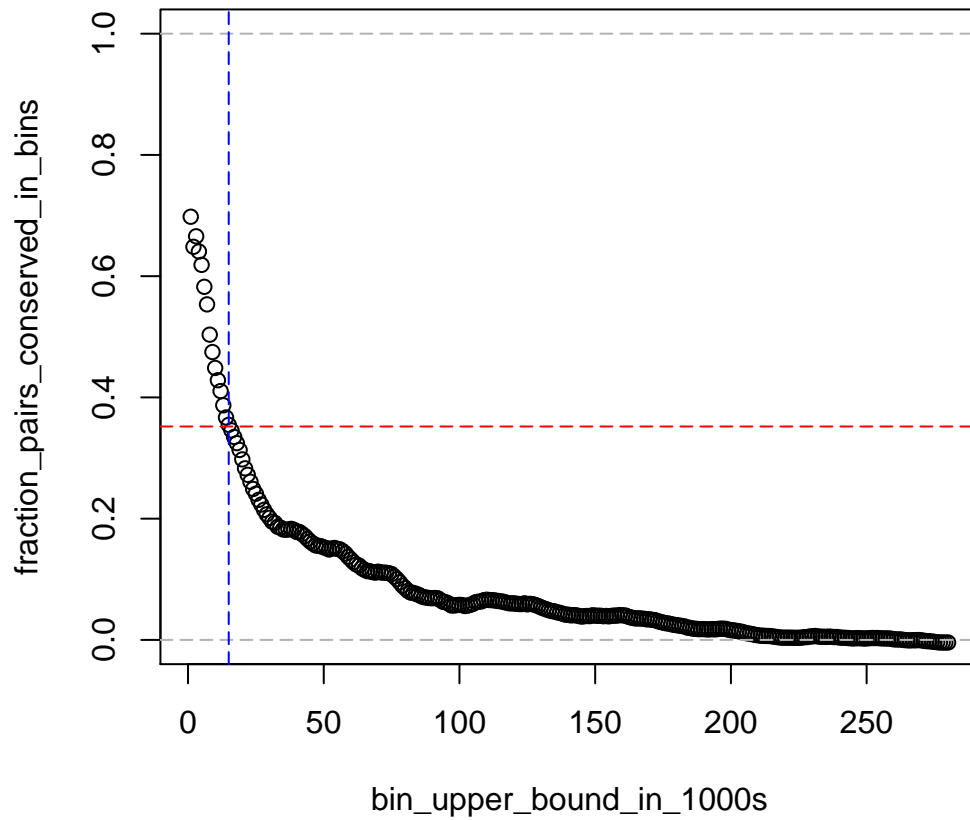

**Bin\_conservation\_minus\_bg\_MA-1D\_vs\_NE-JV-1**  
**PD-0.692633**

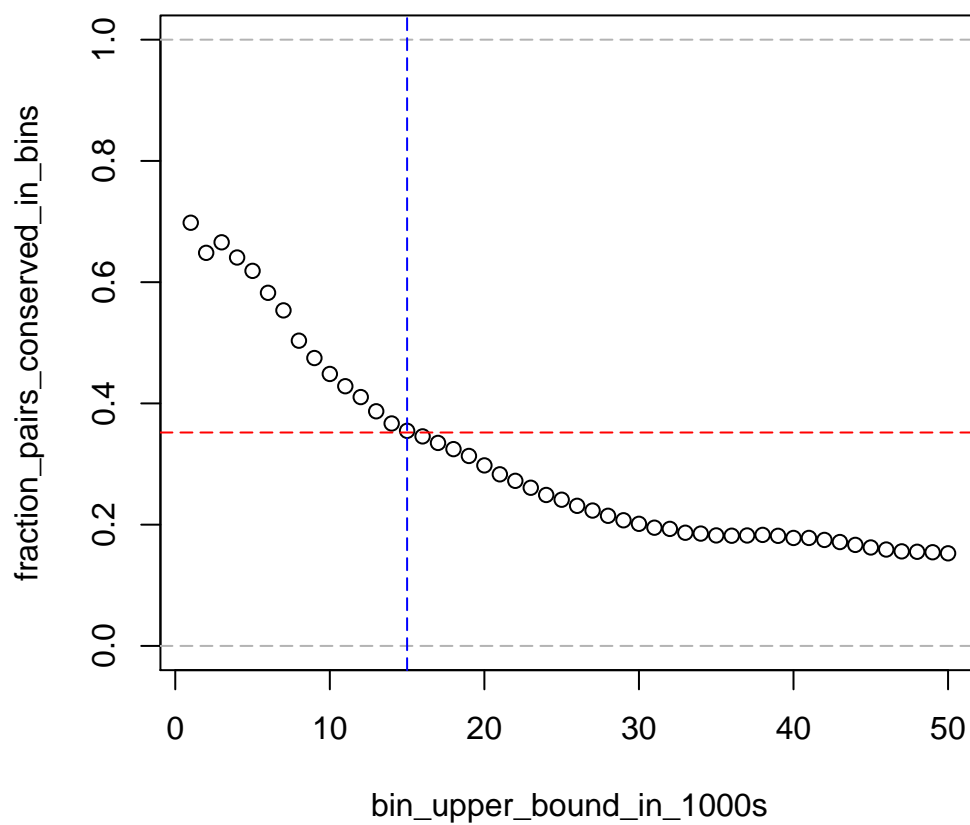

Supplement: s1 [file s1]

**Bin\_conservation\_minus\_bg\_CVA-1\_vs\_NTS-1**  
**PD-0.452574**

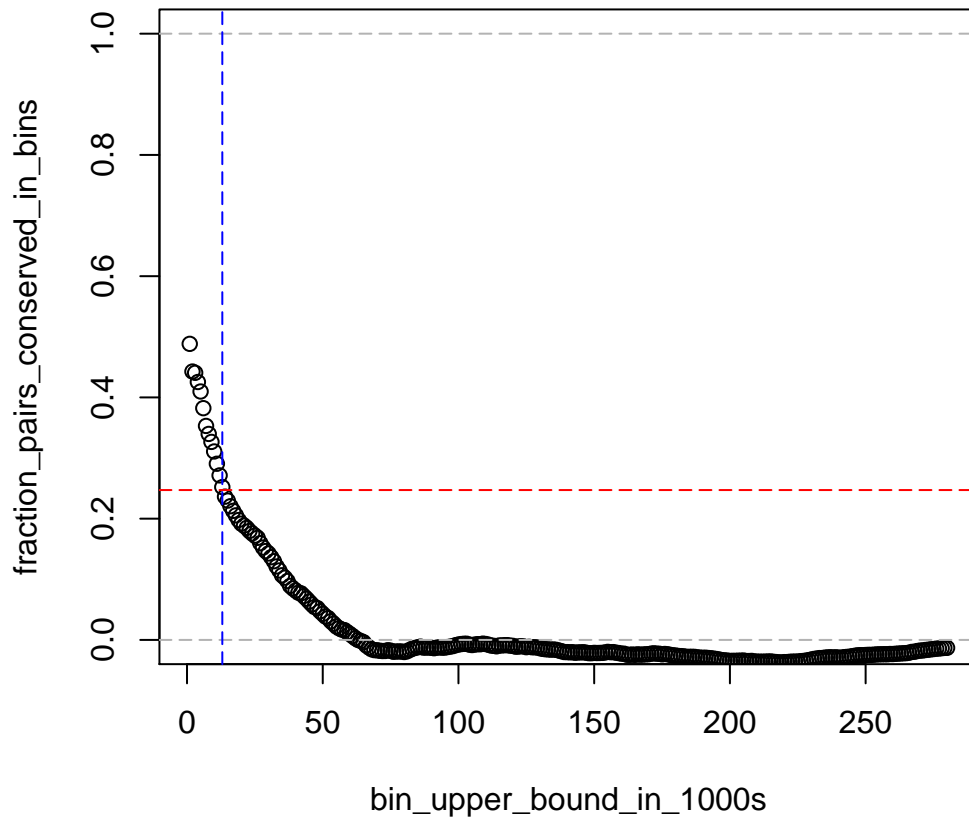

**Bin\_conservation\_minus\_bg\_CVA-1\_vs\_NTS-1**  
**PD-0.452574**

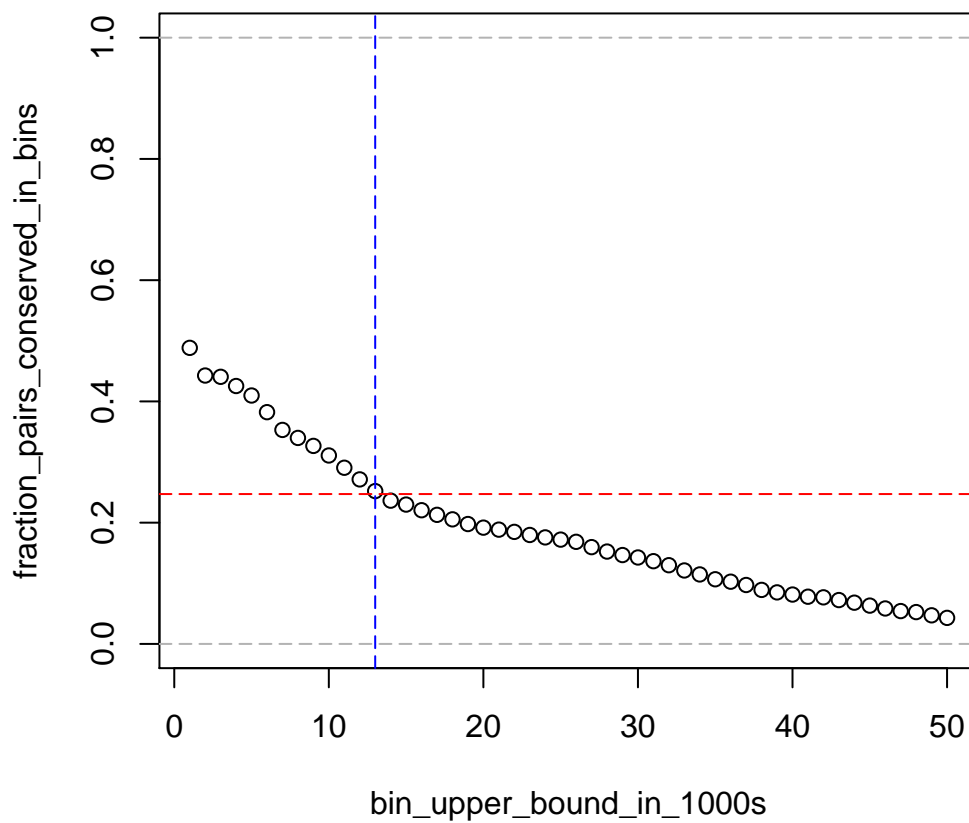

Supplement: s1 [file s1]

**Bin\_conservation\_minus\_bg\_AN69C\_vs\_CZ-2**  
**PD-0.64114**

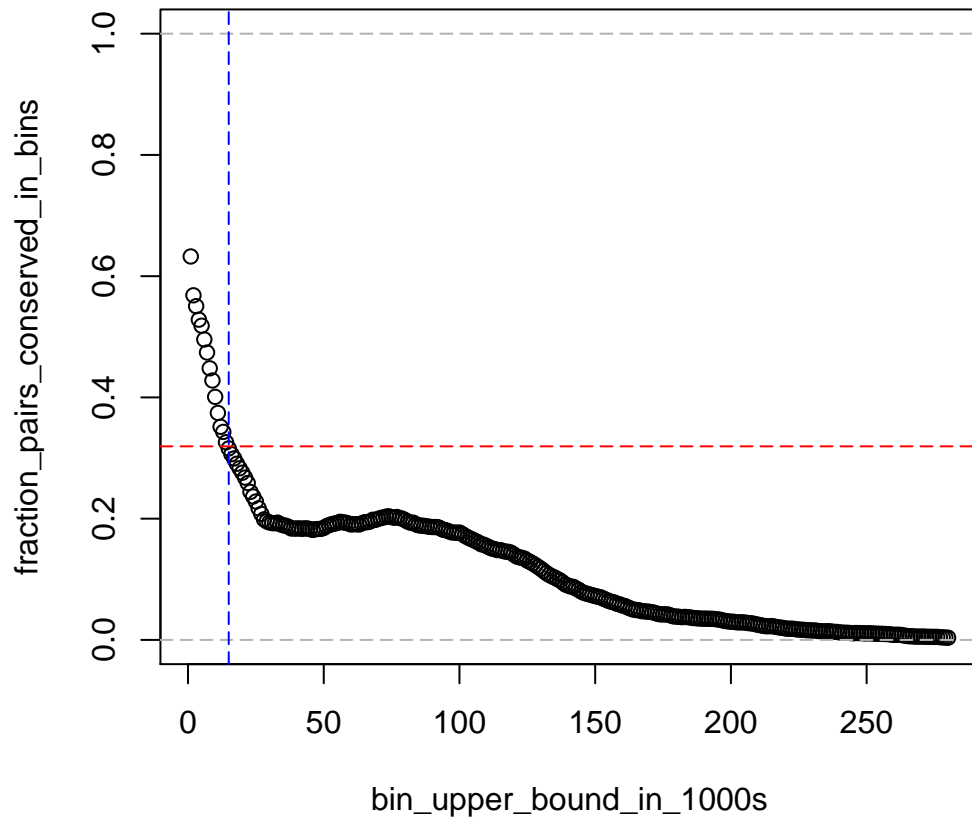

**Bin\_conservation\_minus\_bg\_AN69C\_vs\_CZ-2**  
**PD-0.64114**

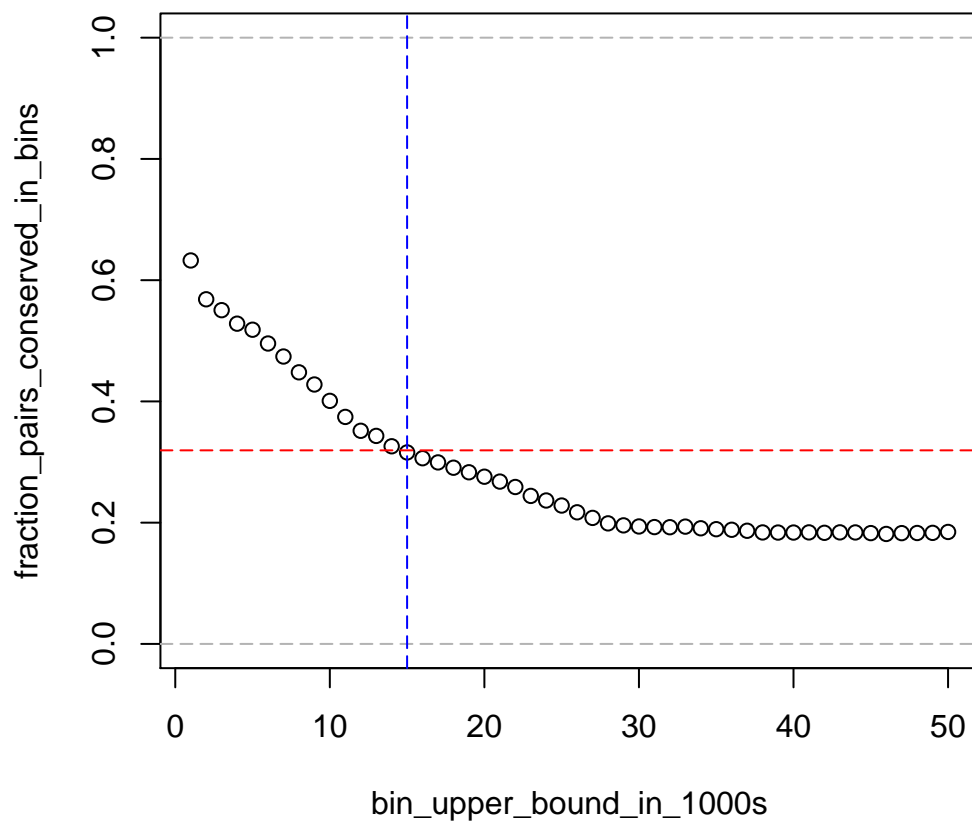

Supplement: s1 [file s1]

**Bin\_conservation\_minus\_bg\_Can18-4\_vs\_CVB-1**  
**PD-0.04957**

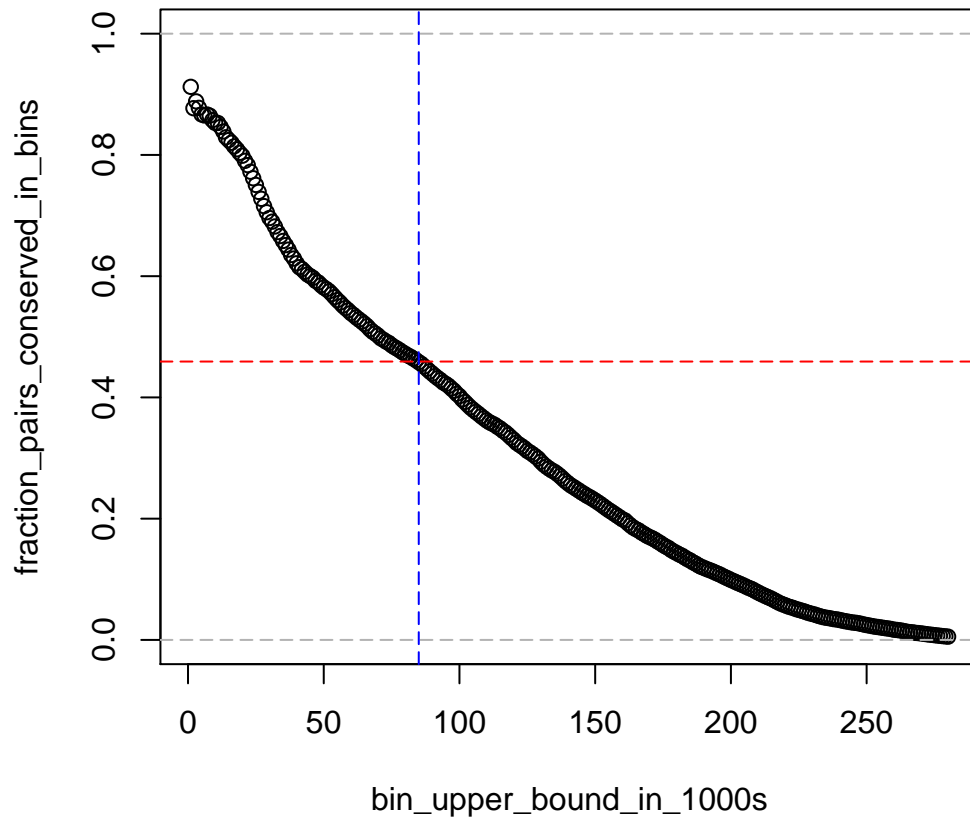

**Bin\_conservation\_minus\_bg\_Can18-4\_vs\_CVB-1**  
**PD-0.04957**

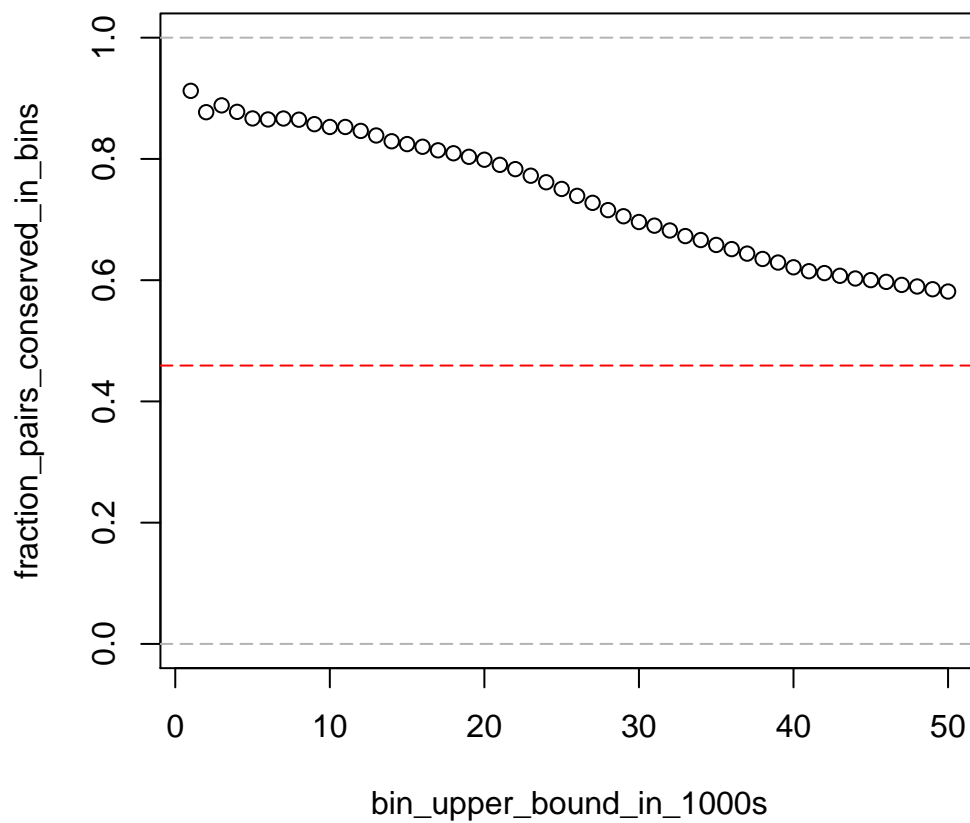

Supplement: s1 [file s1]

**Bin\_conservation\_minus\_bg\_CZ-2\_vs\_NY-2B**  
**PD-0.66829**

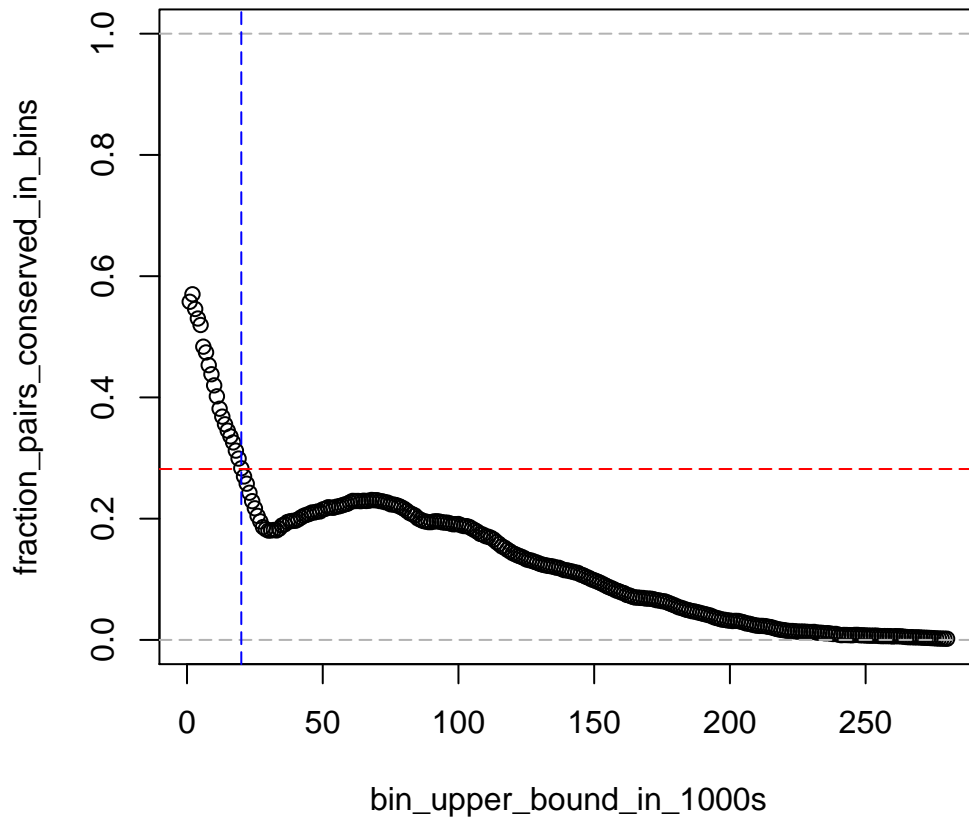

**Bin\_conservation\_minus\_bg\_CZ-2\_vs\_NY-2B**  
**PD-0.66829**

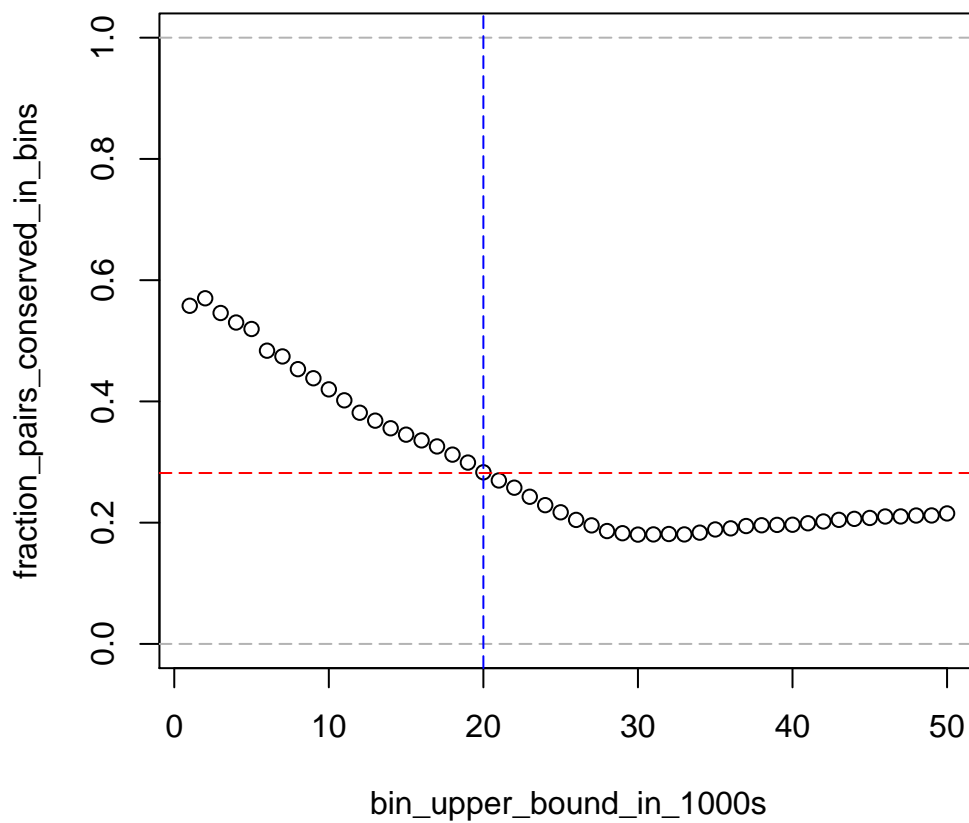

Supplement: s1 [file s1]

**Bin\_conservation\_minus\_bg\_AN69C\_vs\_MA-1D**  
**PD-0.12973**

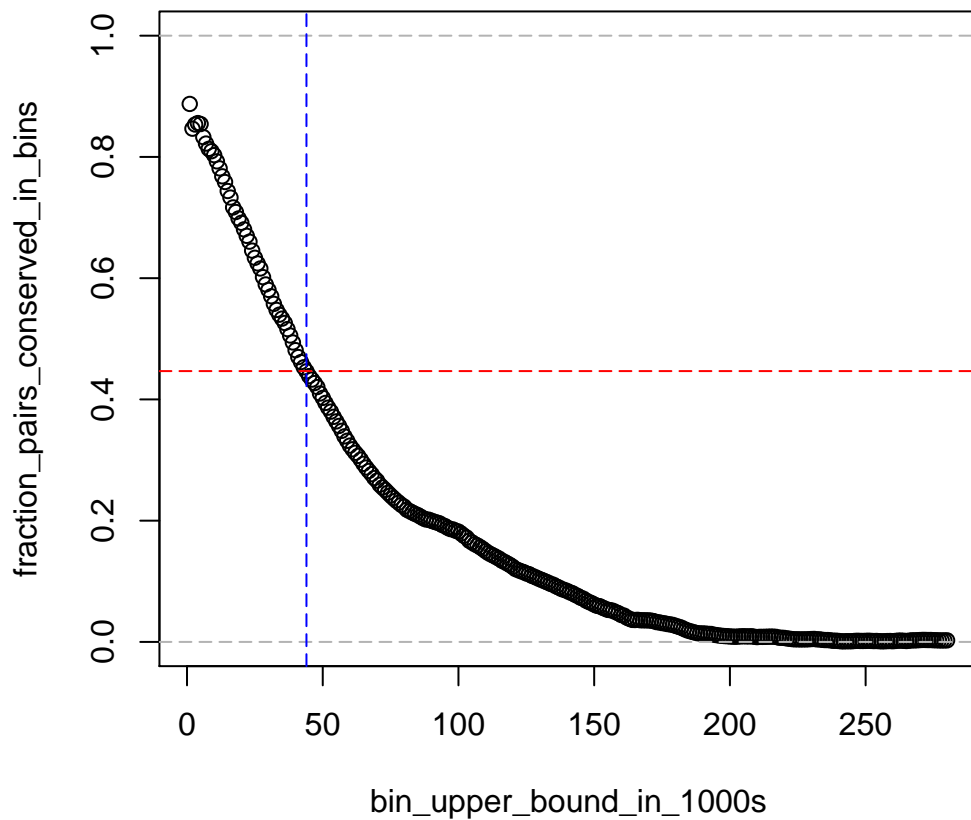

**Bin\_conservation\_minus\_bg\_AN69C\_vs\_MA-1D**  
**PD-0.12973**

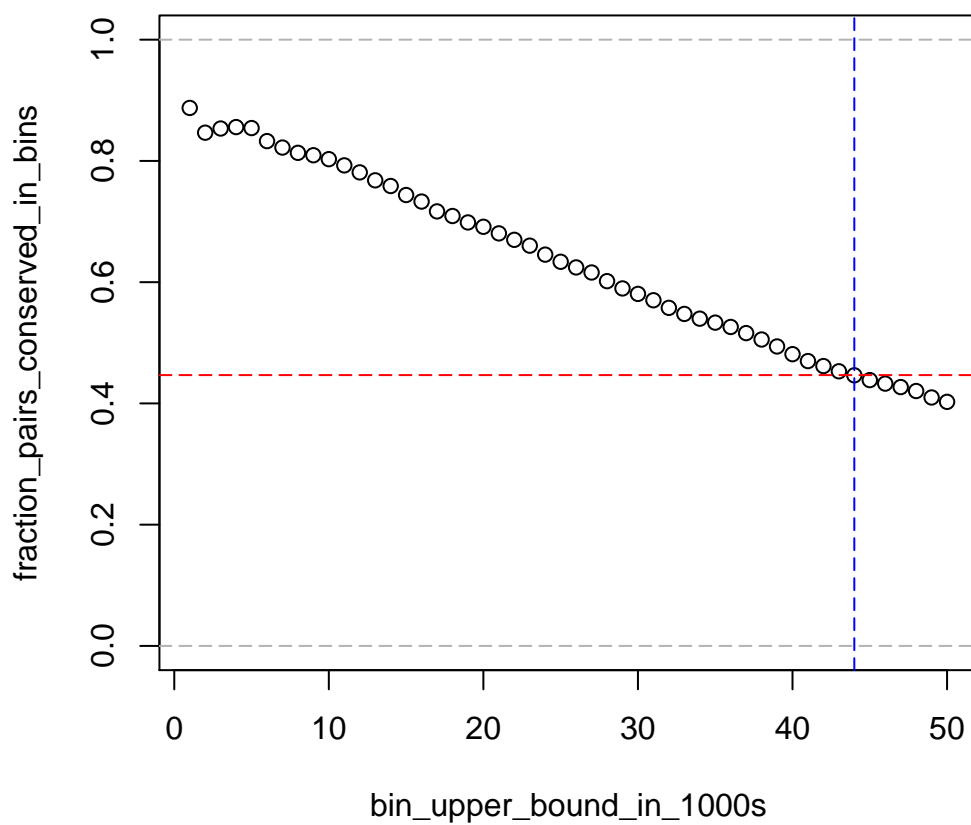

Supplement: s1 [file s1]

**Bin\_conservation\_minus\_bg\_KS1B\_vs\_MA-1D**  
**PD-0.144907**

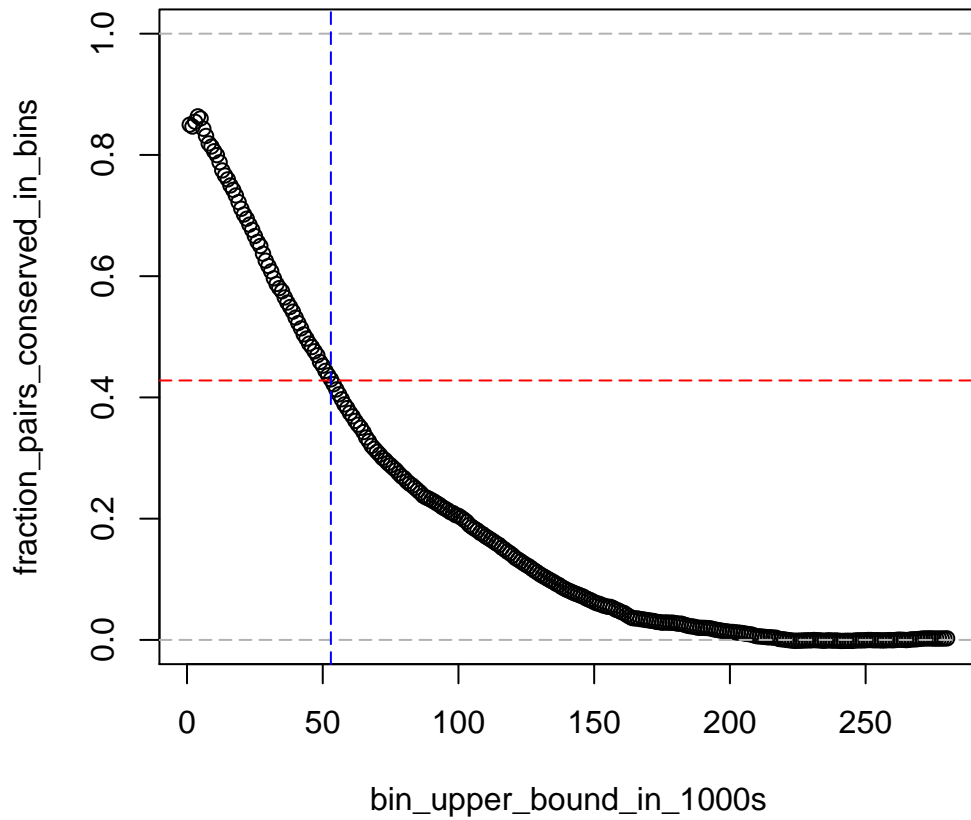

**Bin\_conservation\_minus\_bg\_KS1B\_vs\_MA-1D**  
**PD-0.144907**

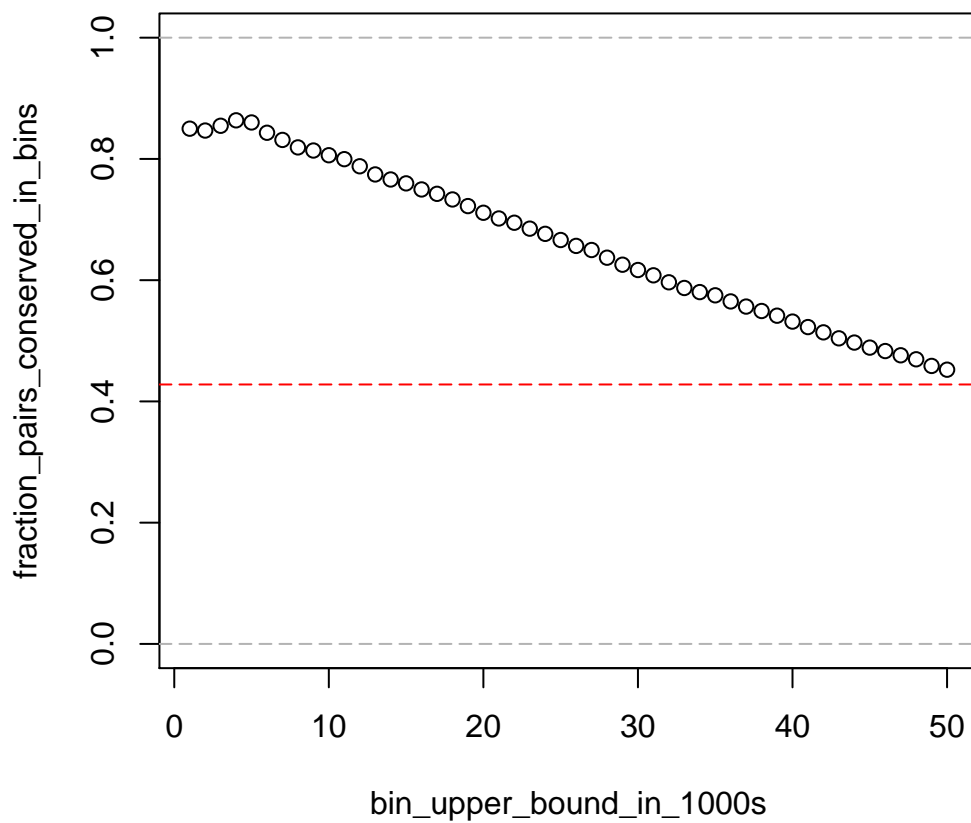

Supplement: s1 [file s1]

**Bin\_conservation\_minus\_bg\_Fr5L\_vs\_TN603.4.2**  
**PD-0.448874**

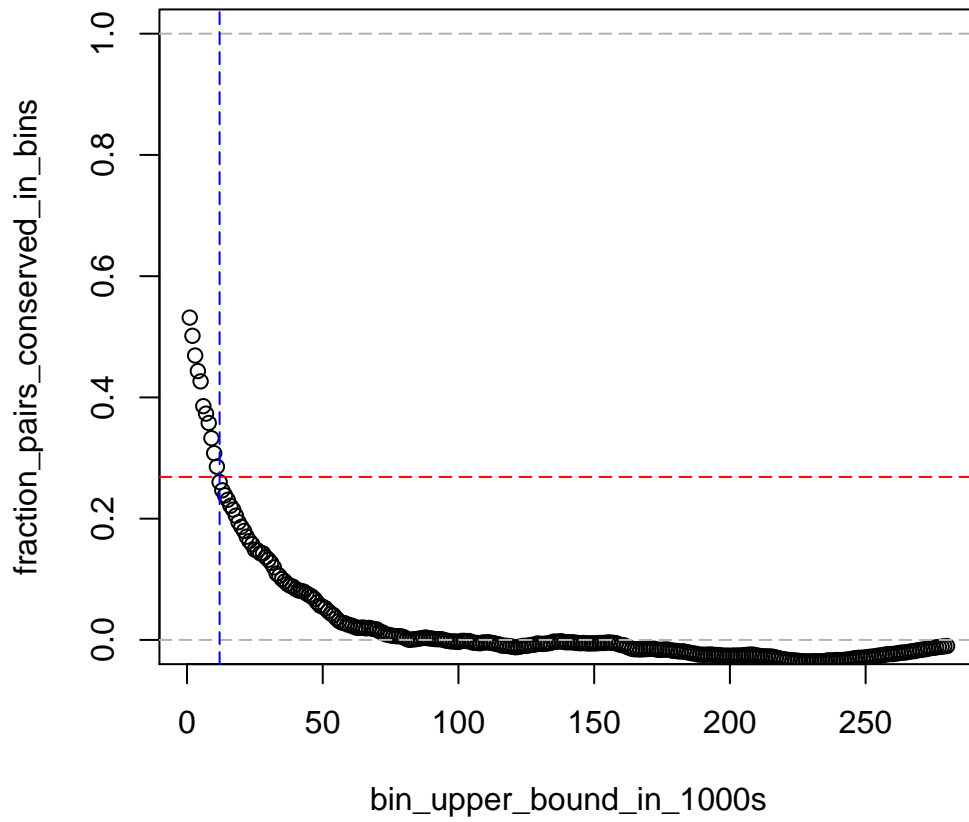

**Bin\_conservation\_minus\_bg\_Fr5L\_vs\_TN603.4.2**  
**PD-0.448874**

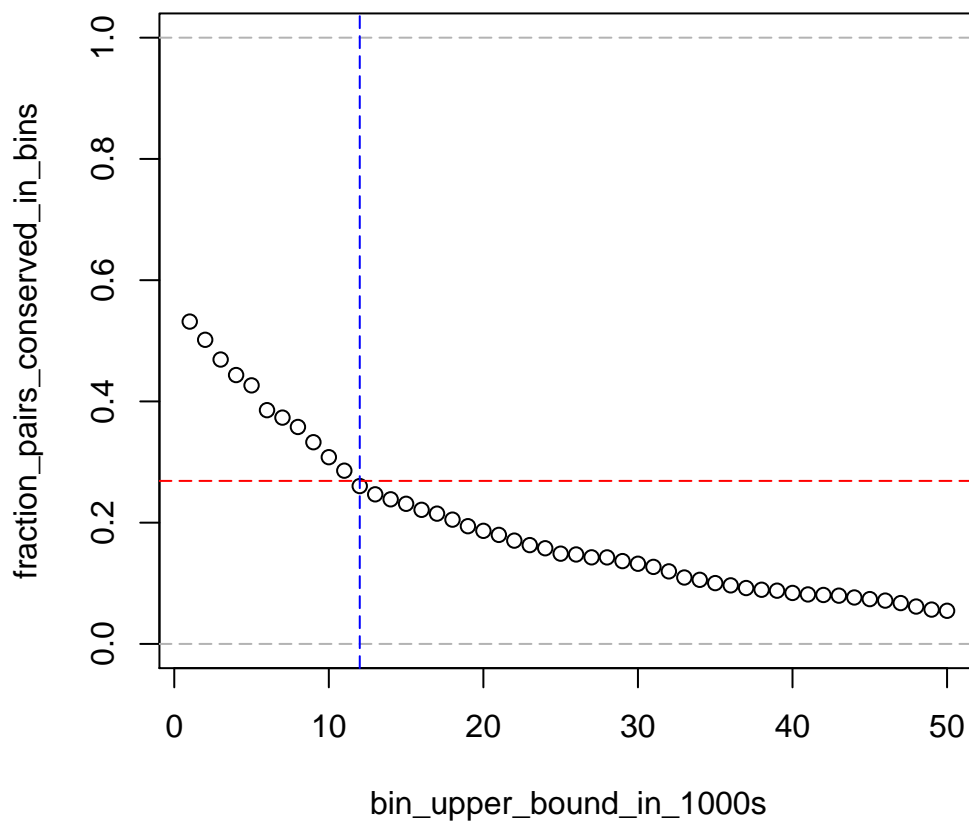

Supplement: s1 [file s1]

**Bin\_conservation\_minus\_bg\_FR483\_vs\_TN603.4.2**  
**PD-0.454741**

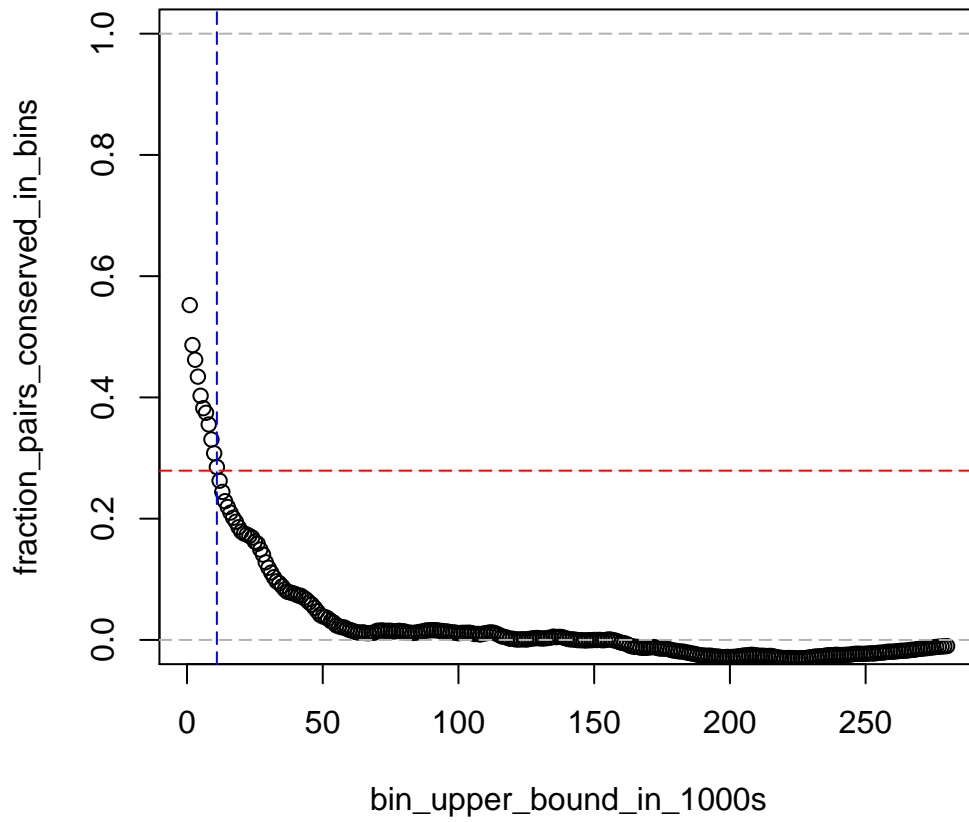

**Bin\_conservation\_minus\_bg\_FR483\_vs\_TN603.4.2**  
**PD-0.454741**

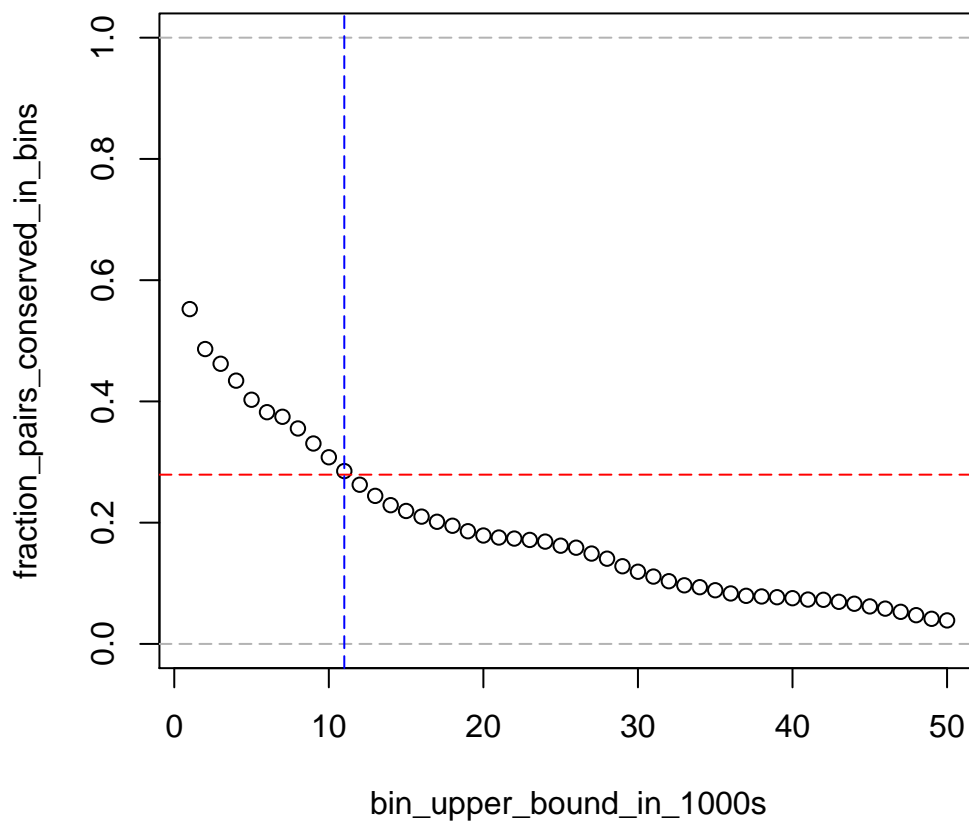

Supplement: s1 [file s1]

**Bin\_conservation\_minus\_bg\_GM0701.1\_vs\_TN603.4.2**  
**PD-0.034499**

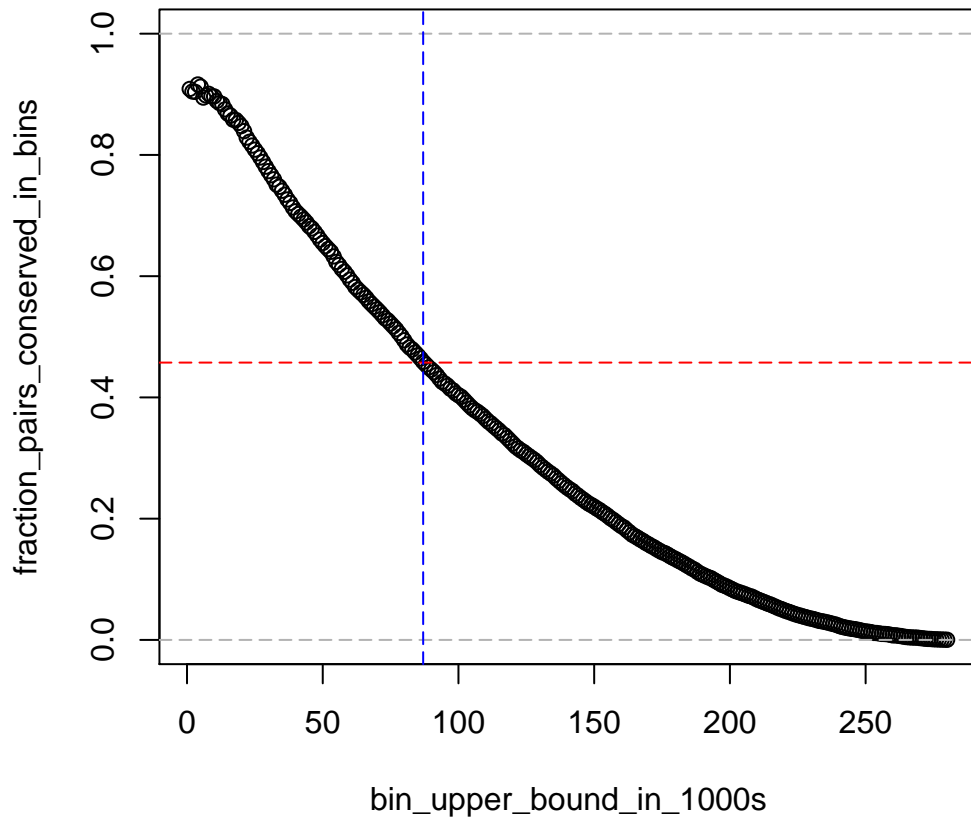

**Bin\_conservation\_minus\_bg\_GM0701.1\_vs\_TN603.4.2**  
**PD-0.034499**

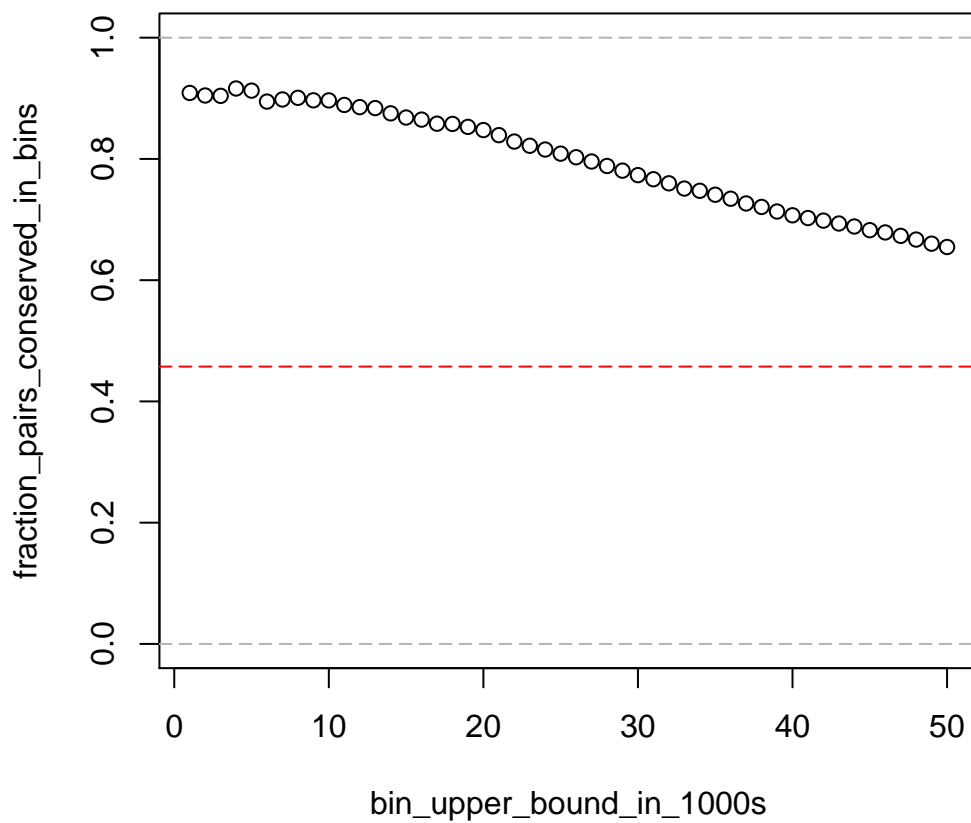

Supplement: s1 [file s1]

**Bin\_conservation\_minus\_bg\_CVB-1\_vs\_MT325**  
**PD-0.038827**

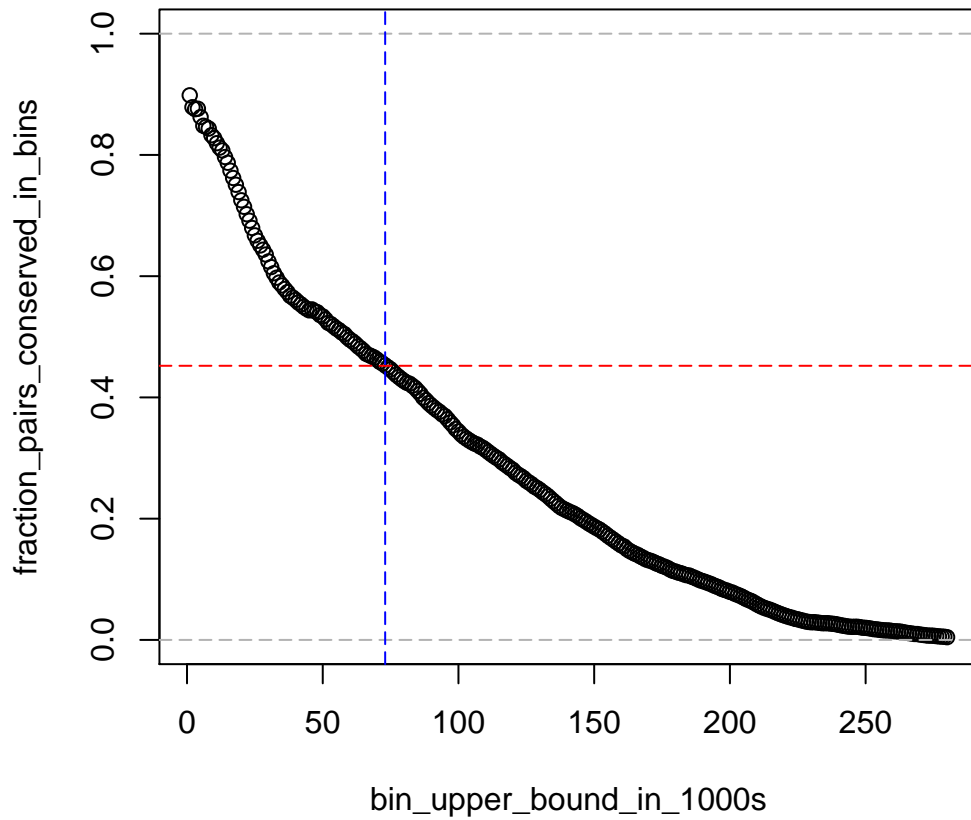

**Bin\_conservation\_minus\_bg\_CVB-1\_vs\_MT325**  
**PD-0.038827**

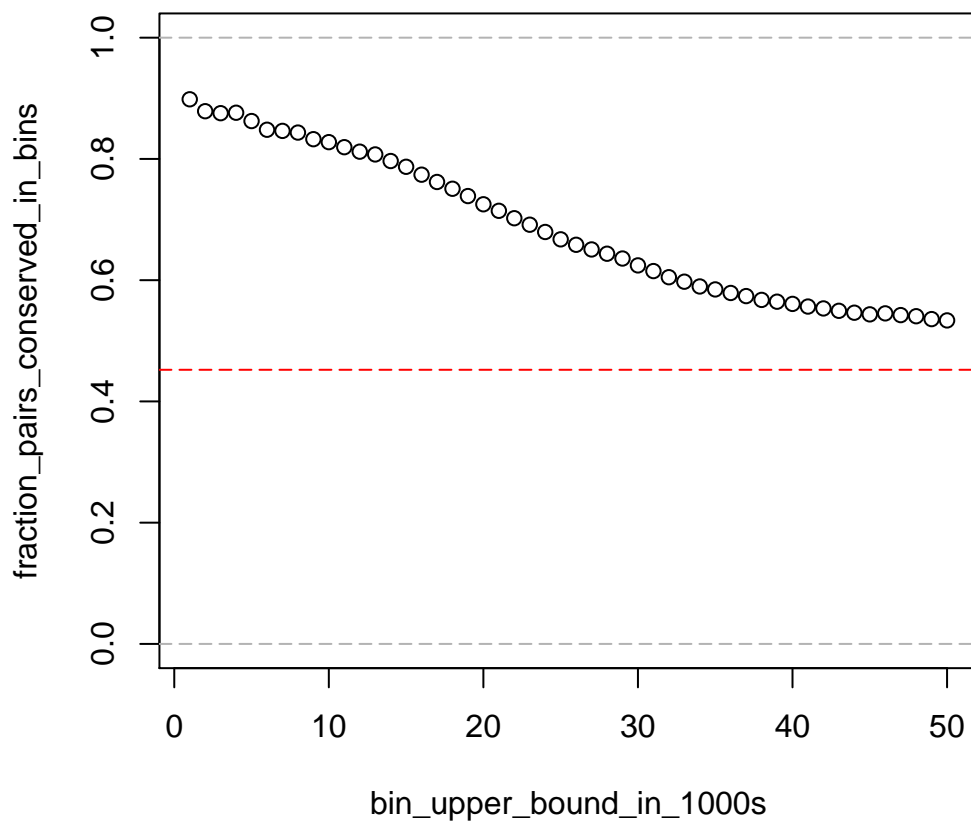

Supplement: s1 [file s1]

**Bin\_conservation\_minus\_bg\_NTS-1\_vs\_NW665.2**  
**PD-0.458193**

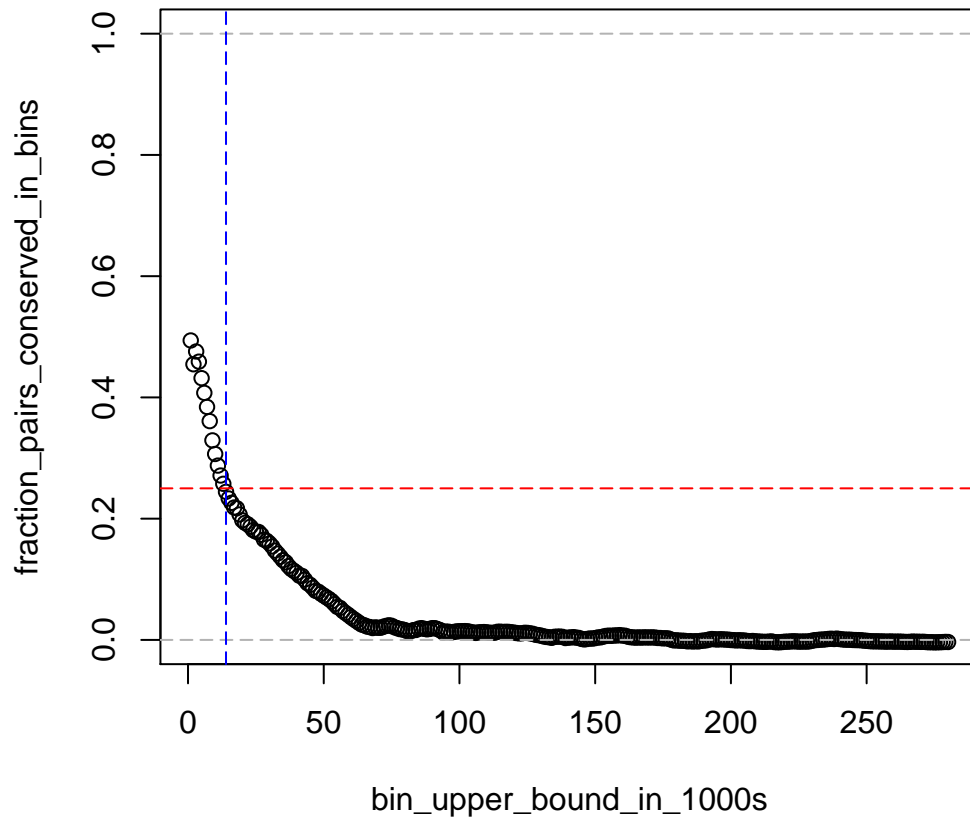

**Bin\_conservation\_minus\_bg\_NTS-1\_vs\_NW665.2**  
**PD-0.458193**

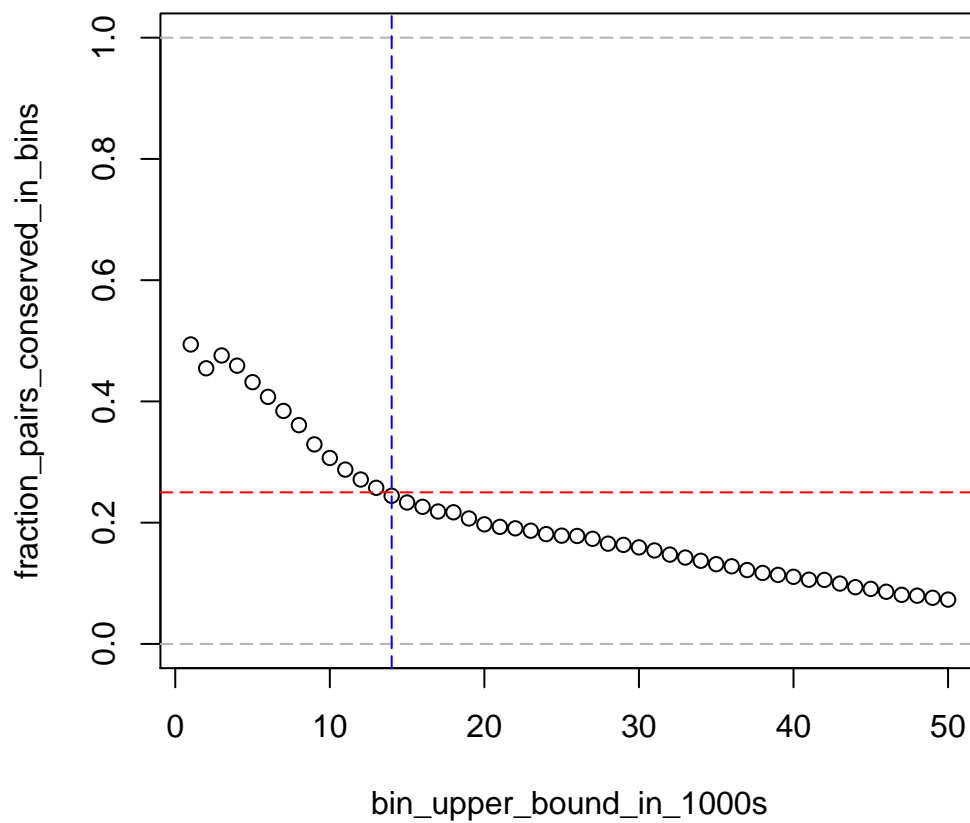

Supplement: s1 [file s1]

**Bin\_conservation\_minus\_bg\_Canal-1\_vs\_CVR-1**  
**PD-0.458215**

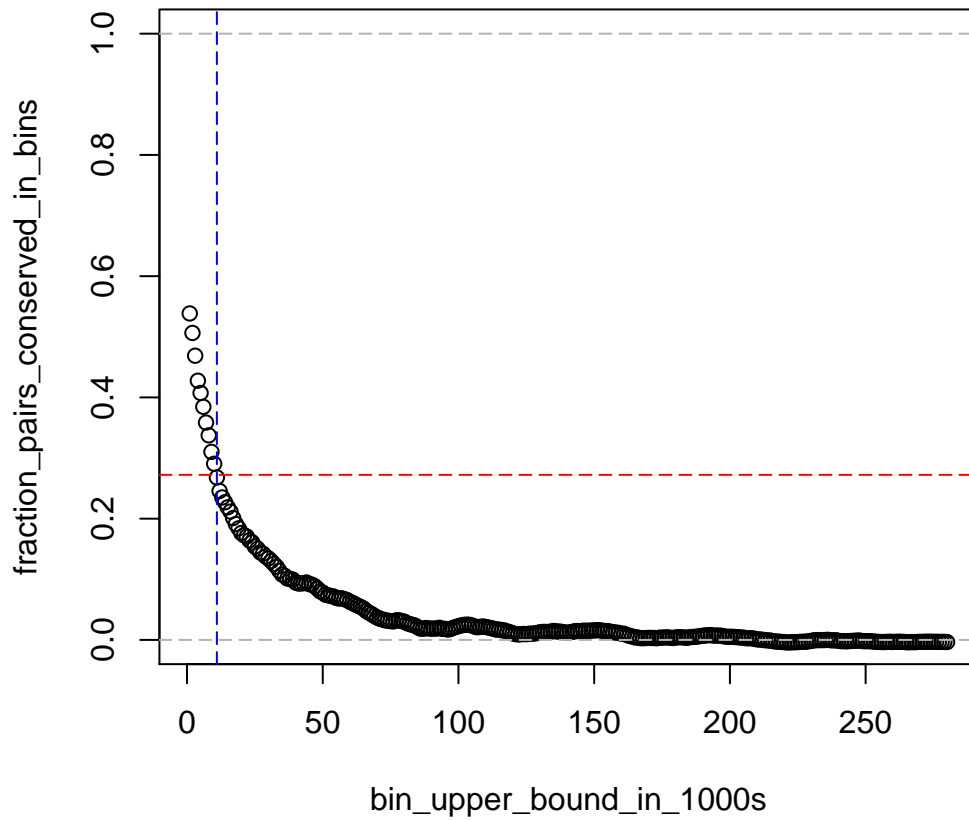

**Bin\_conservation\_minus\_bg\_Canal-1\_vs\_CVR-1**  
**PD-0.458215**

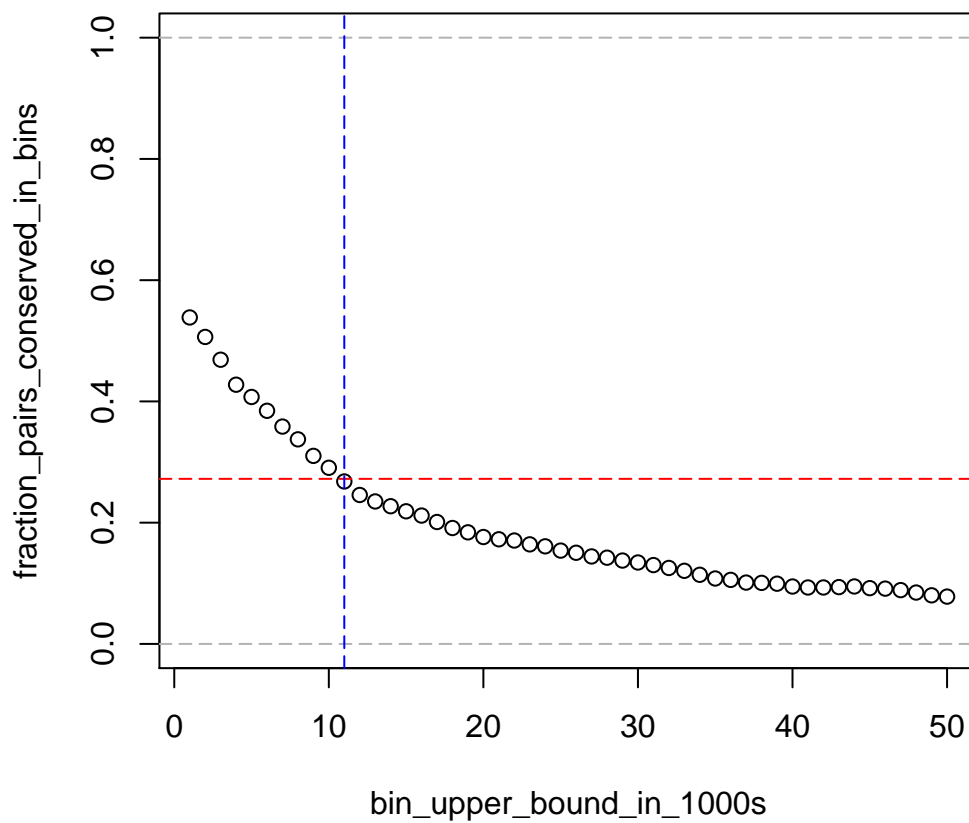

Supplement: s1 [file s1]

**Bin\_conservation\_minus\_bg\_GM0701.1\_vs\_NYs-1**  
**PD-0.692366**

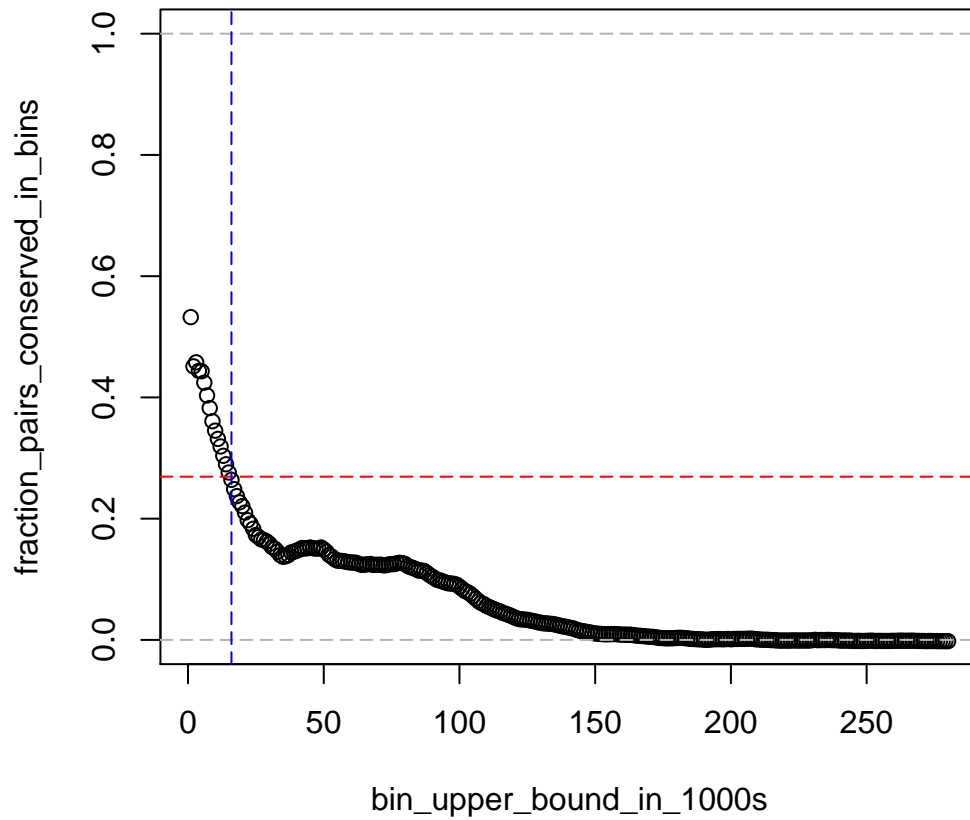

**Bin\_conservation\_minus\_bg\_GM0701.1\_vs\_NYs-1**  
**PD-0.692366**

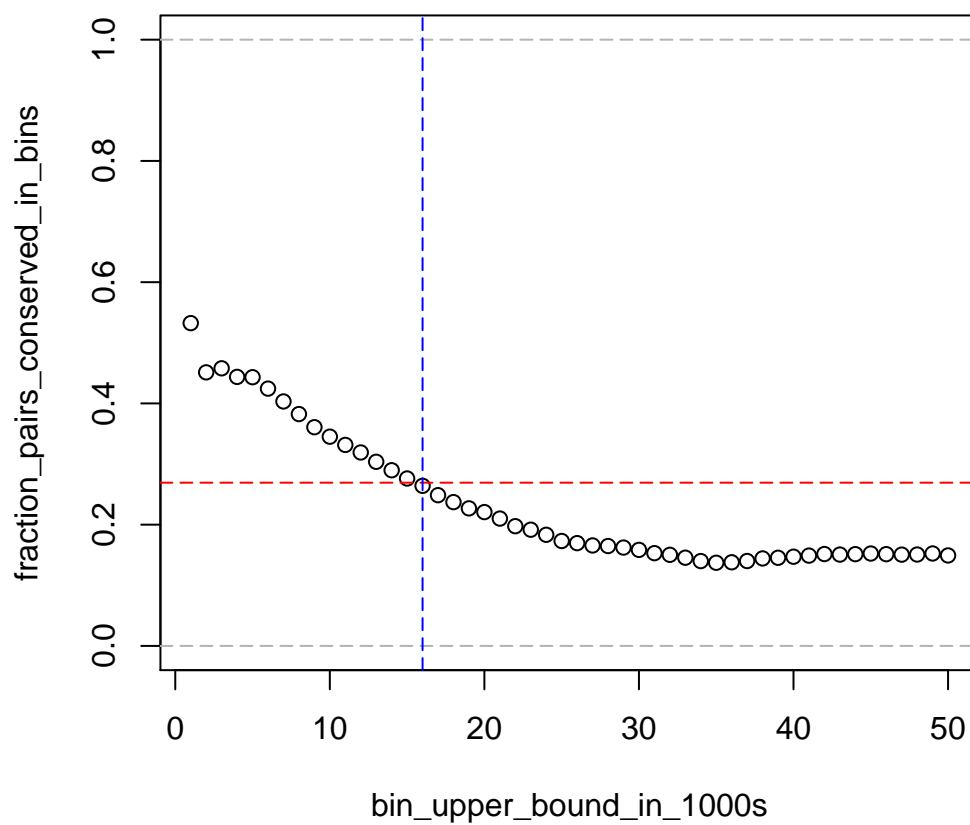

Supplement: s1 [file s1]

**Bin\_conservation\_minus\_bg\_AP110A\_vs\_NY2A**  
**PD-0.670373**

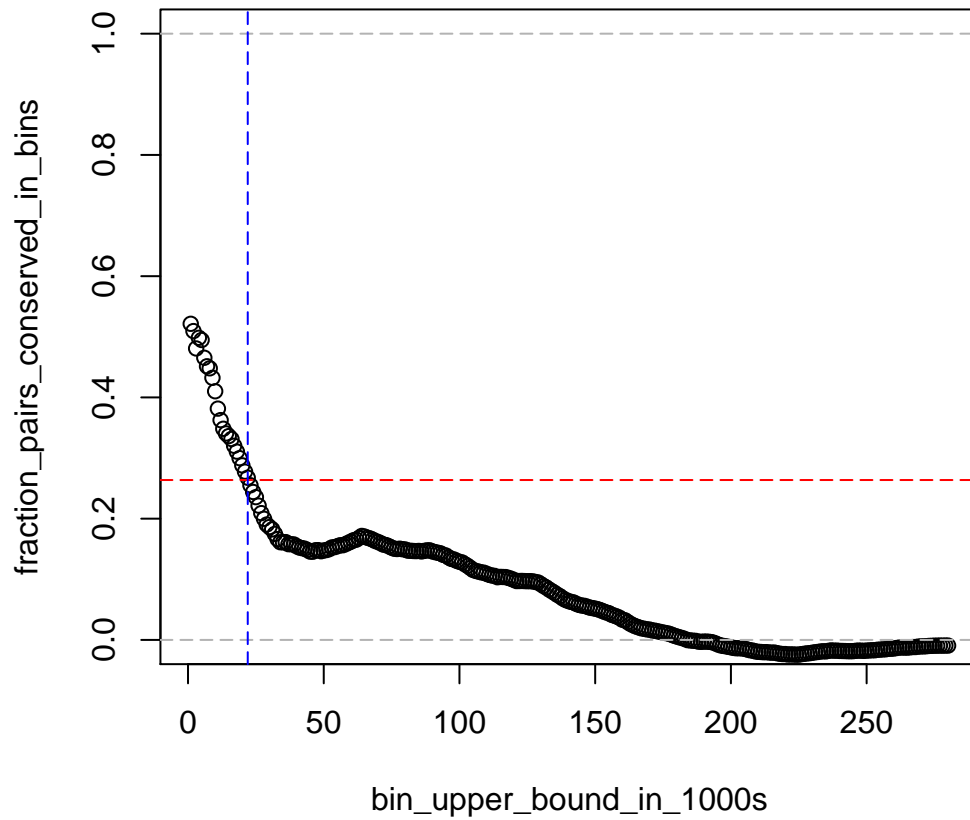

**Bin\_conservation\_minus\_bg\_AP110A\_vs\_NY2A**  
**PD-0.670373**

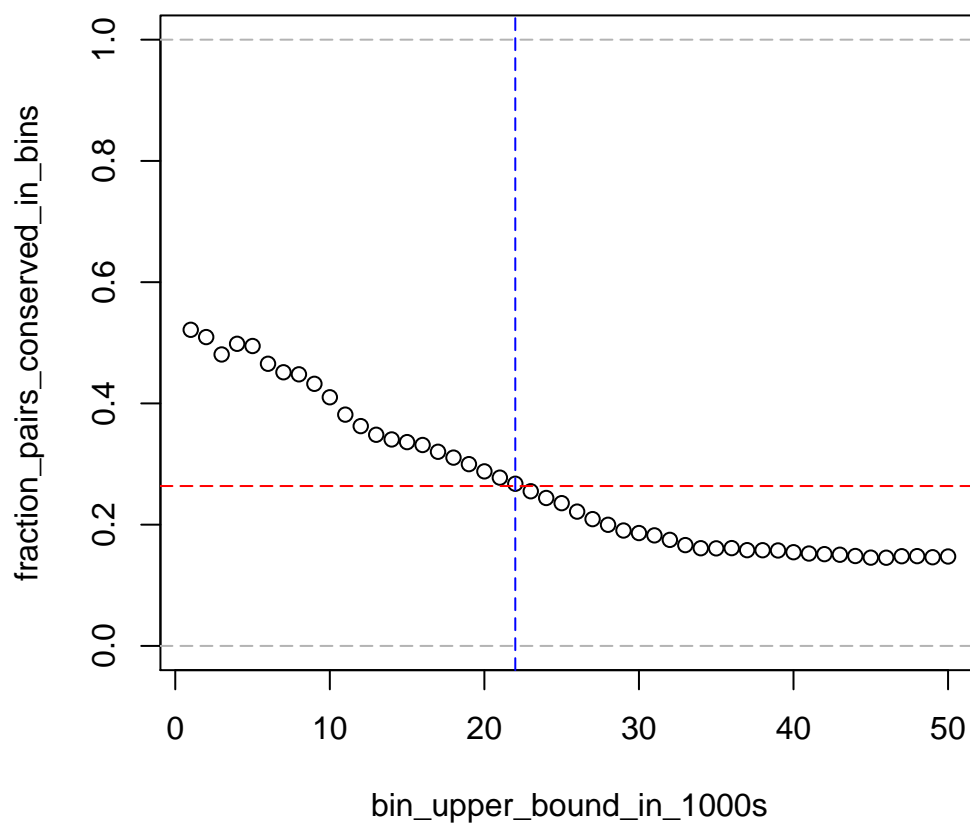

Supplement: s1 [file s1]

**Bin\_conservation\_minus\_bg\_CVG-1\_vs\_CZ-2**  
**PD-0.043441**

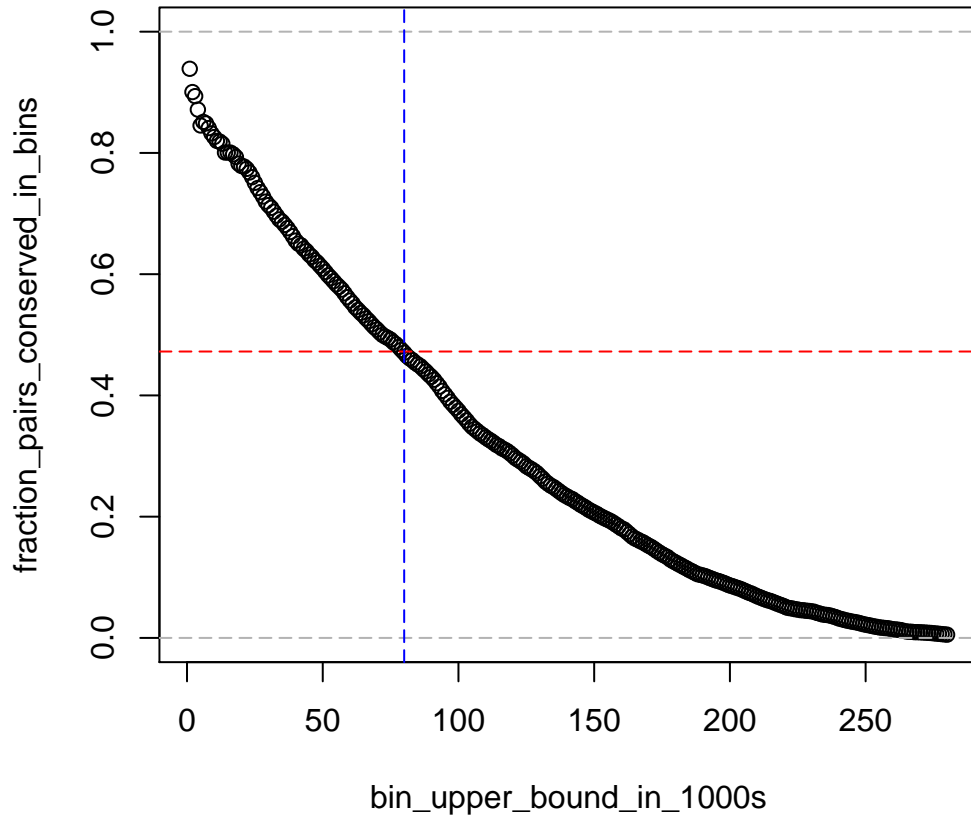

**Bin\_conservation\_minus\_bg\_CVG-1\_vs\_CZ-2**  
**PD-0.043441**

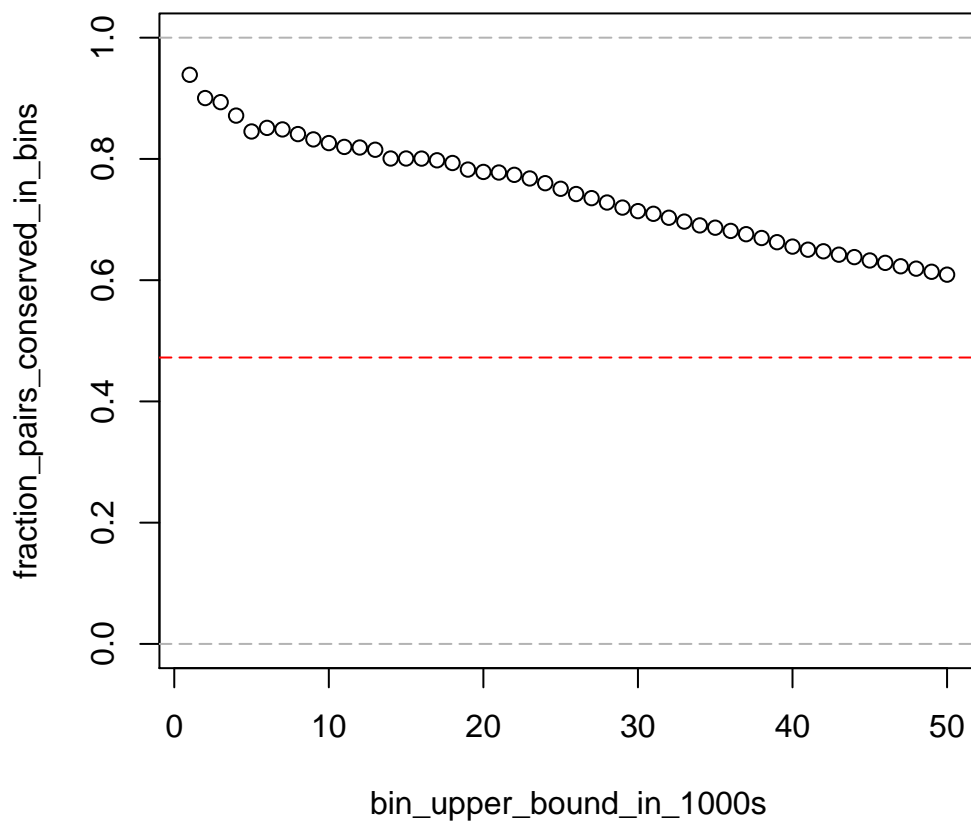

Supplement: s1 [file s1]

**Bin\_conservation\_minus\_bg\_ATCV1\_vs\_CVM-1**  
**PD-0.458734**

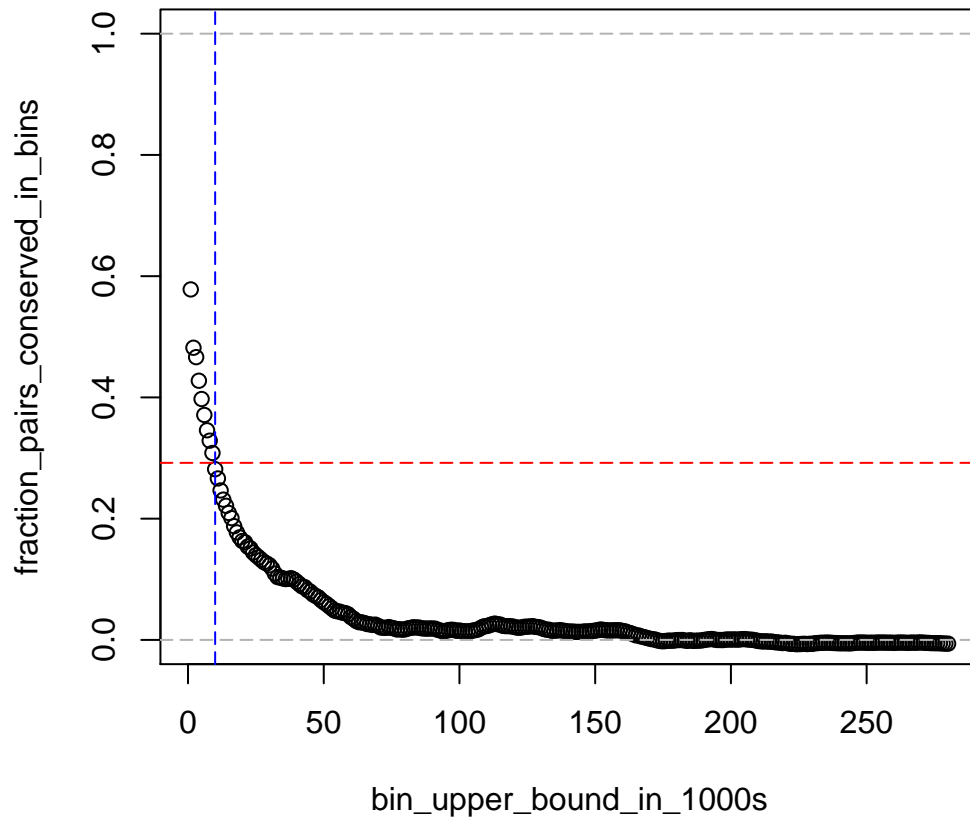

**Bin\_conservation\_minus\_bg\_ATCV1\_vs\_CVM-1**  
**PD-0.458734**

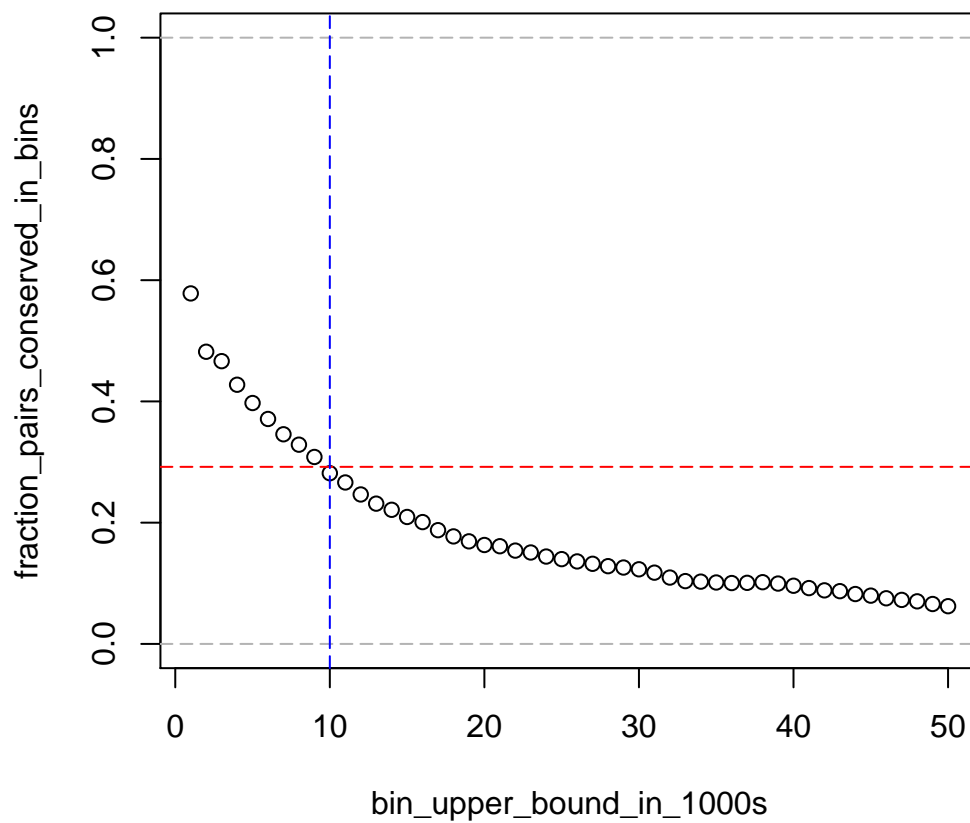

Supplement: s1 [file s1]

**Bin\_conservation\_minus\_bg\_ATCV1\_vs\_NE-JV-4**  
**PD-0.681012**

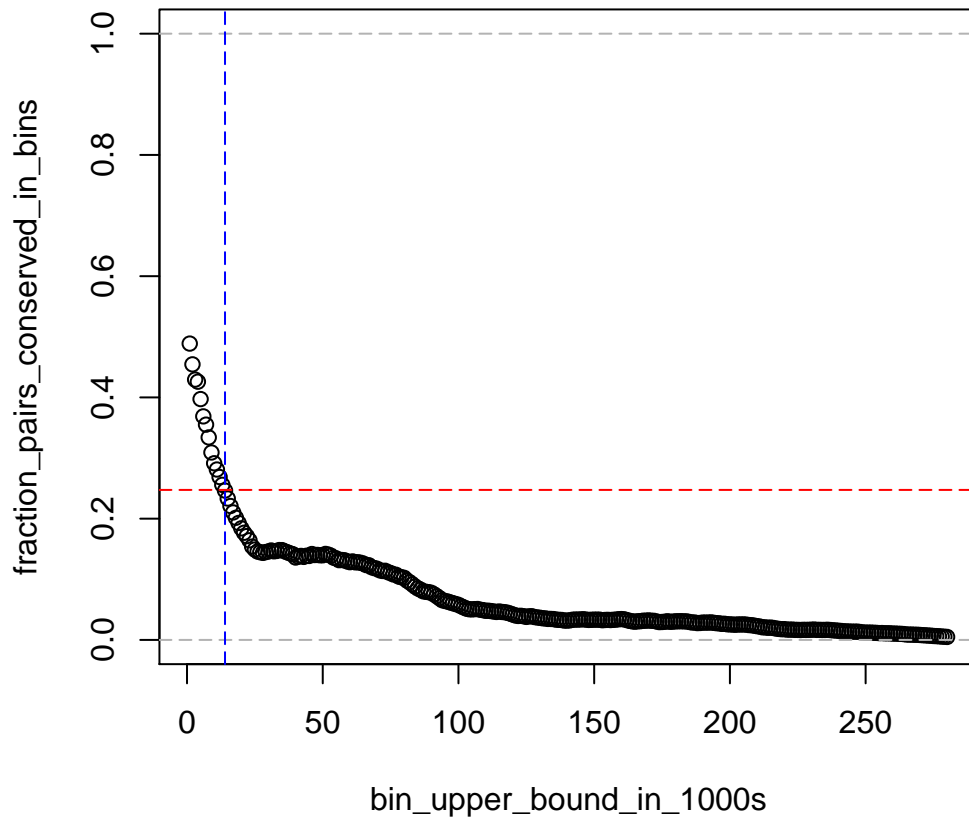

**Bin\_conservation\_minus\_bg\_ATCV1\_vs\_NE-JV-4**  
**PD-0.681012**

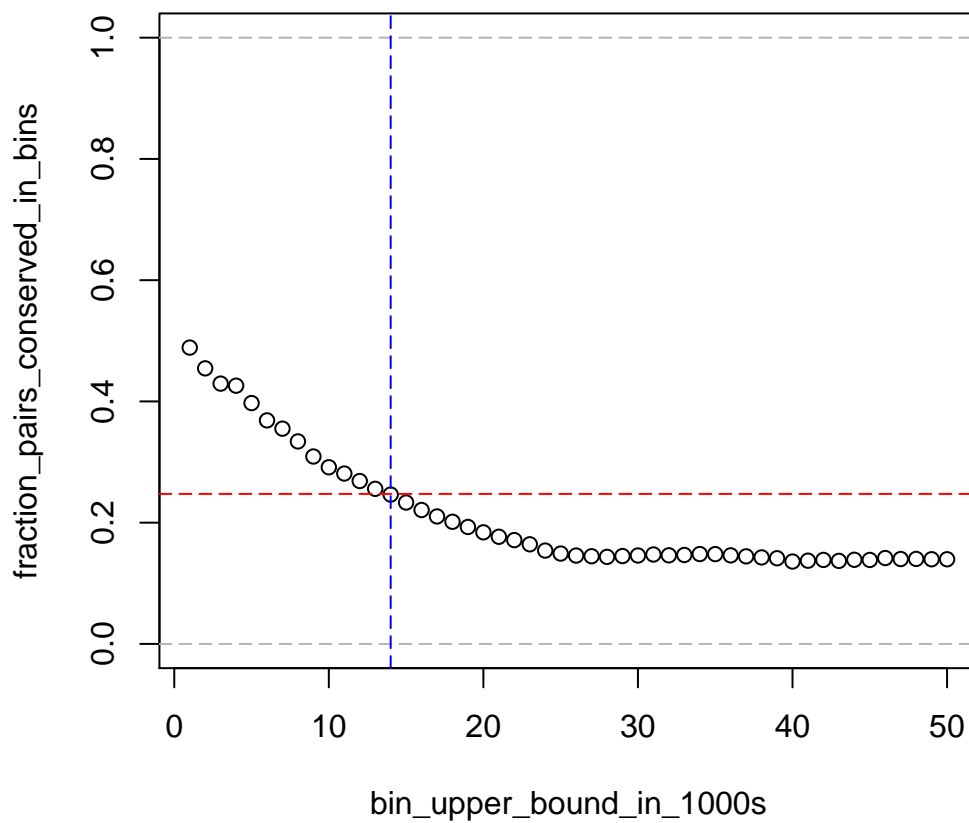

Supplement: s1 [file s1]

**Bin\_conservation\_minus\_bg\_CVB-1\_vs\_CVM-1**  
**PD-0.030905**

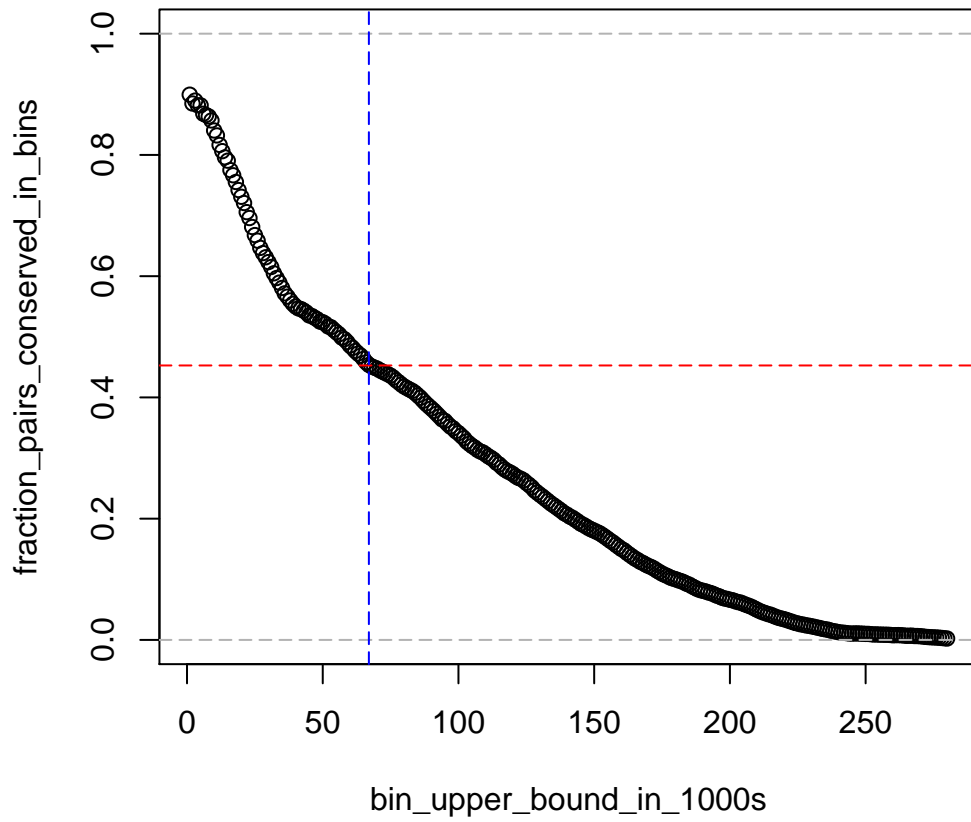

**Bin\_conservation\_minus\_bg\_CVB-1\_vs\_CVM-1**  
**PD-0.030905**

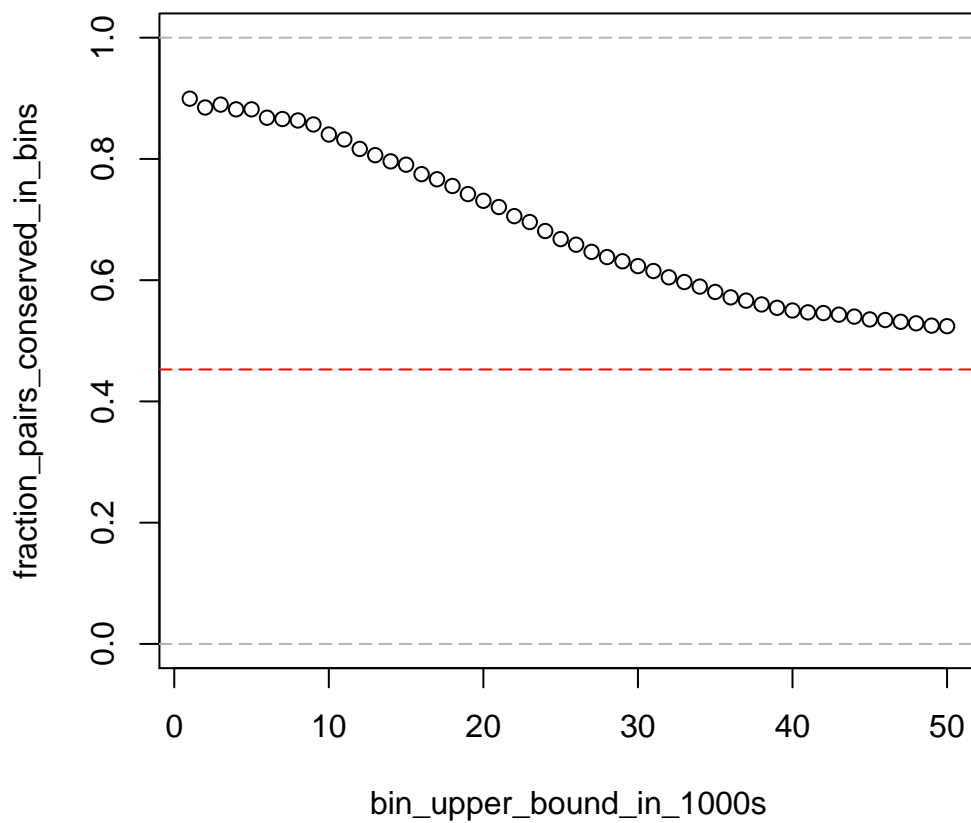

Supplement: s1 [file s1]

**Bin\_conservation\_minus\_bg\_MO0605SPH\_vs\_NE-JV-1**  
**PD-0.497399**

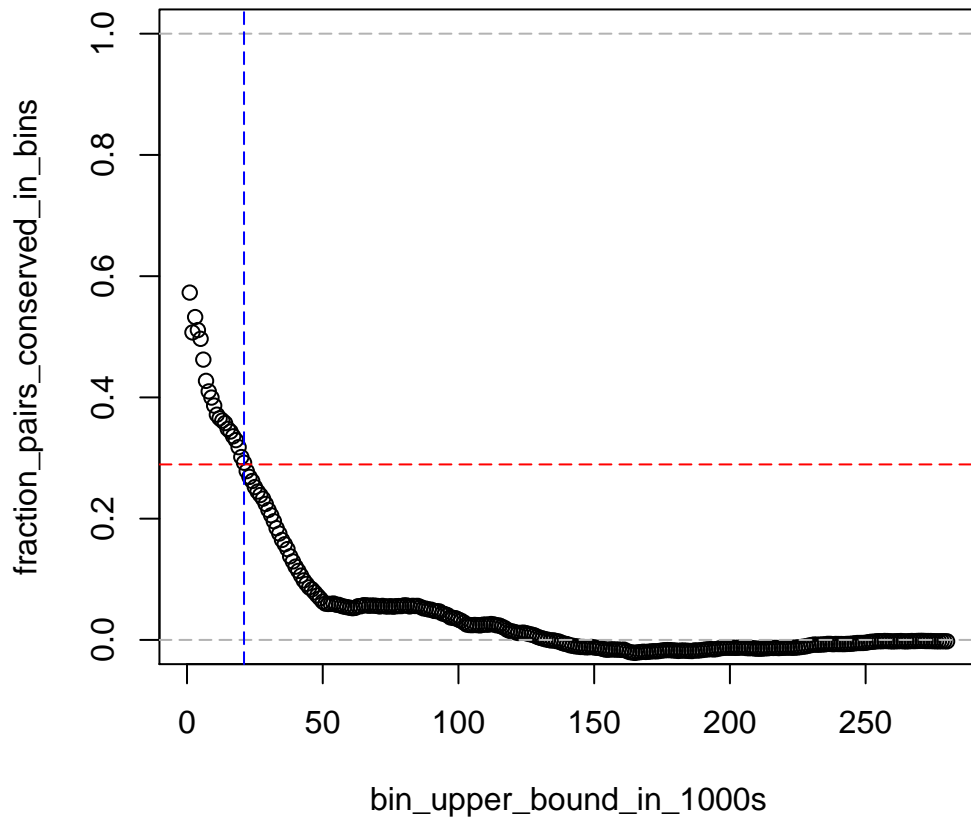

**Bin\_conservation\_minus\_bg\_MO0605SPH\_vs\_NE-JV-1**  
**PD-0.497399**

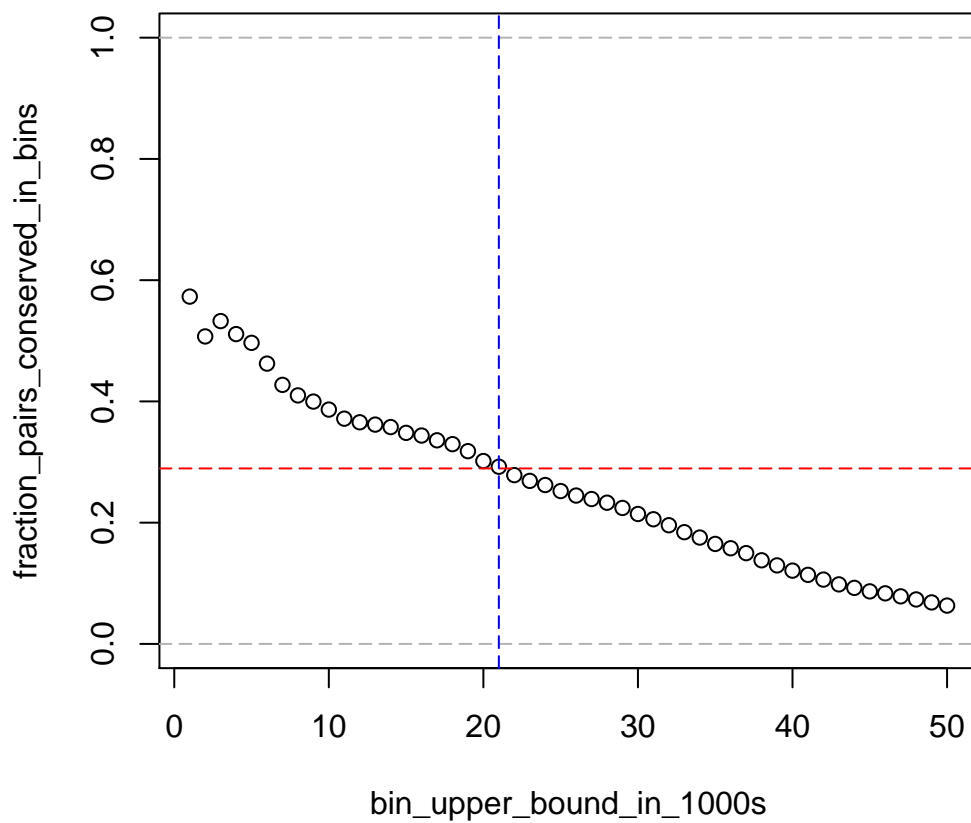

Supplement: s1 [file s1]

**Bin\_conservation\_minus\_bg\_Br0604L\_vs\_GM0701.1**  
**PD-0.034113**

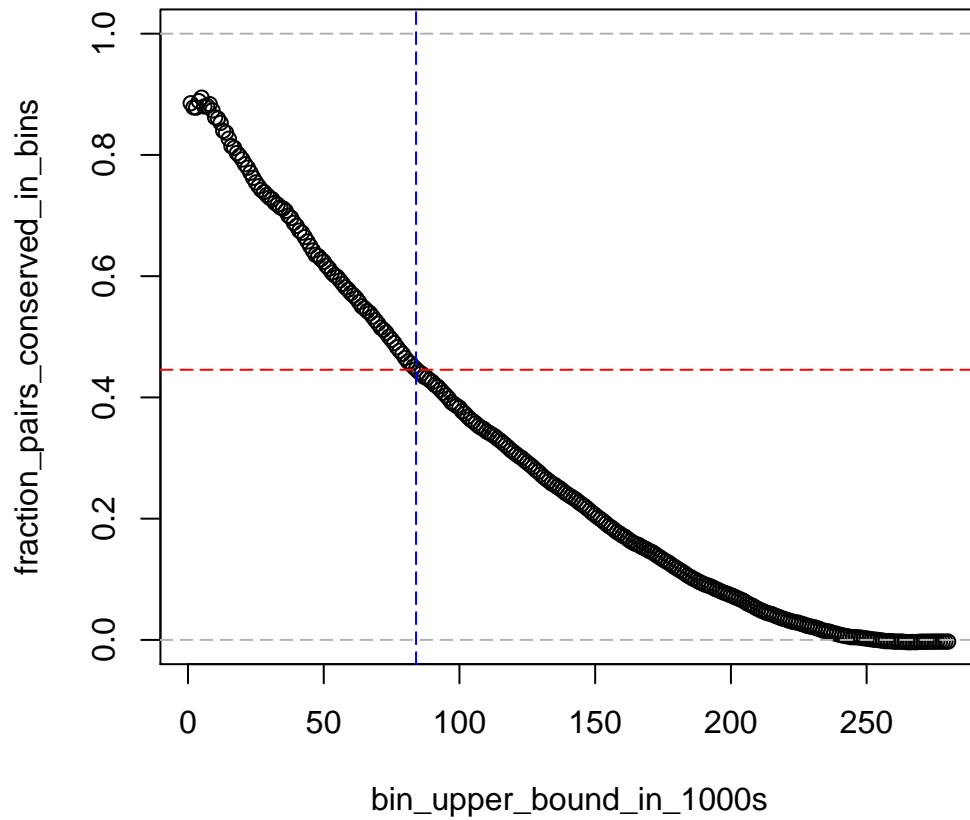

**Bin\_conservation\_minus\_bg\_Br0604L\_vs\_GM0701.1**  
**PD-0.034113**

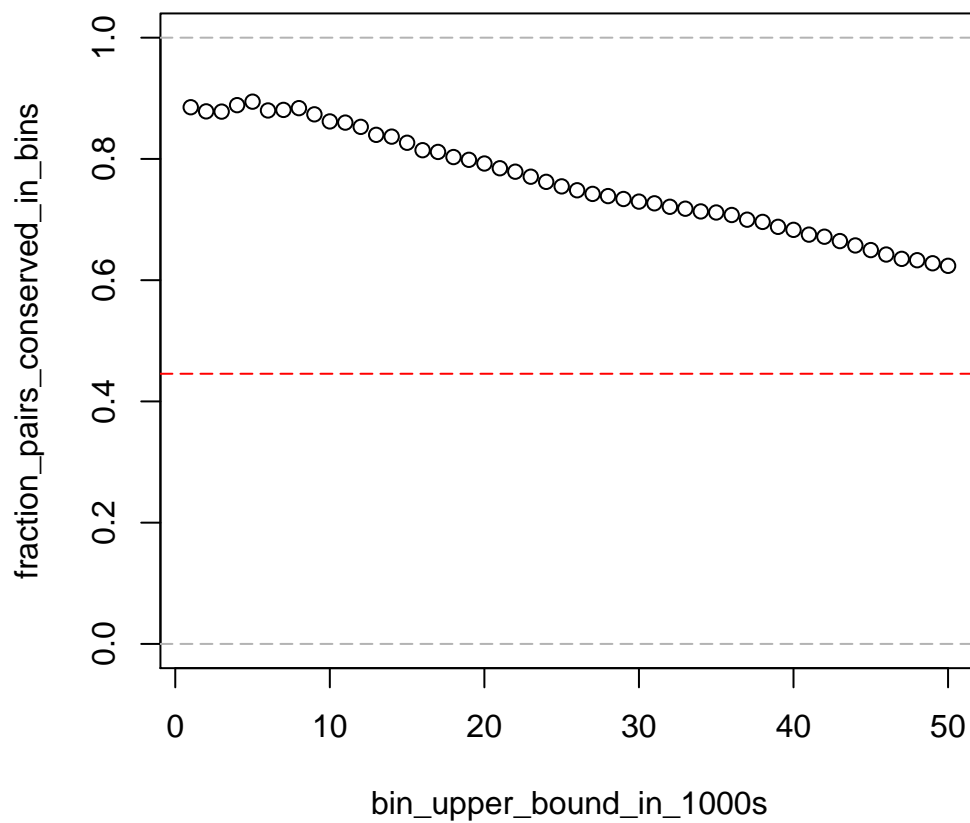

Supplement: s1 [file s1]

**Bin\_conservation\_minus\_bg\_Can18-4\_vs\_IL-5-2s1**  
**PD-0.671043**

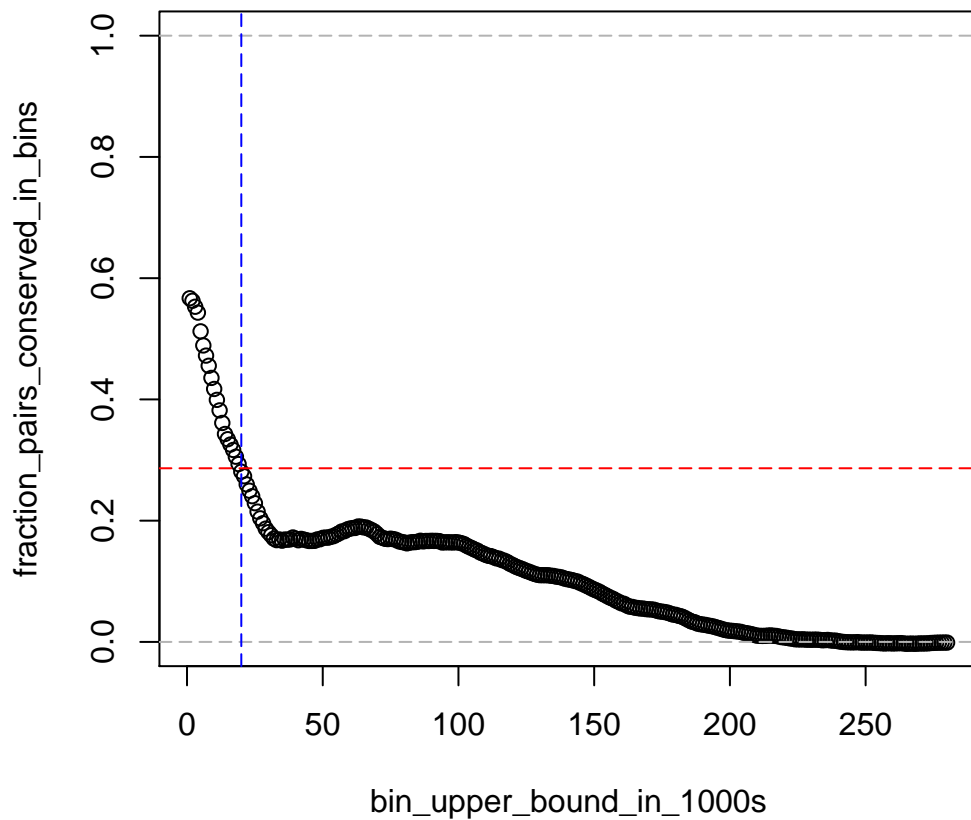

**Bin\_conservation\_minus\_bg\_Can18-4\_vs\_IL-5-2s1**  
**PD-0.671043**

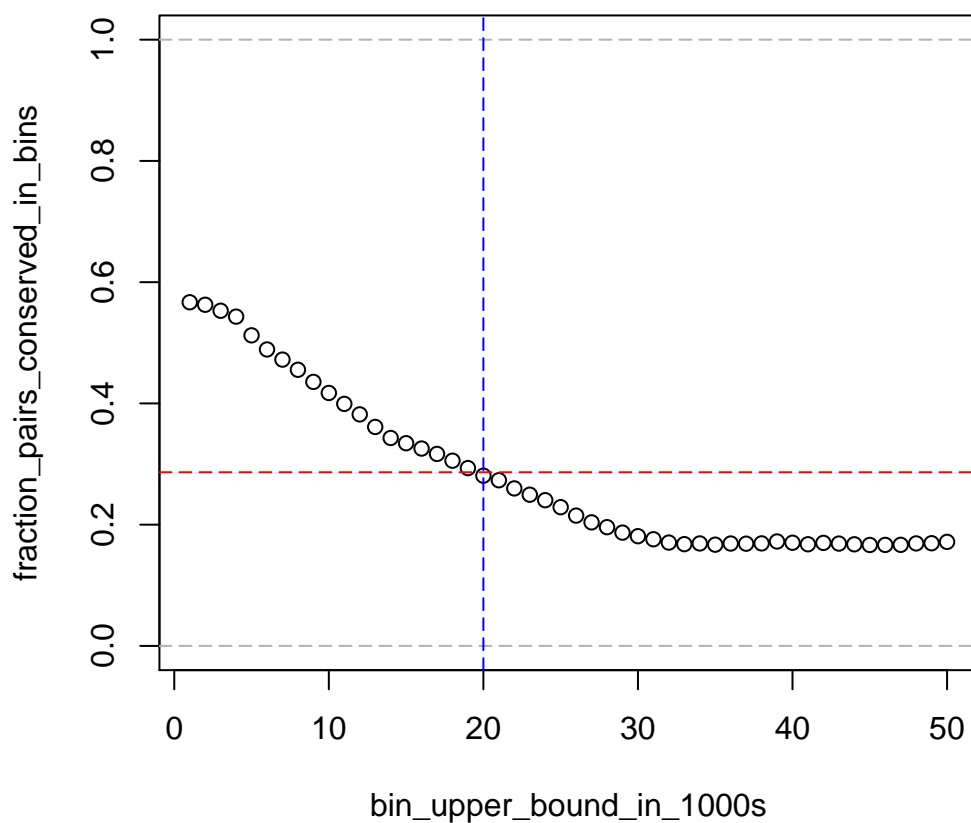

Supplement: s1 [file s1]

**Bin\_conservation\_minus\_bg\_GM0701.1\_vs\_NE-JV-3**  
**PD-0.062407**

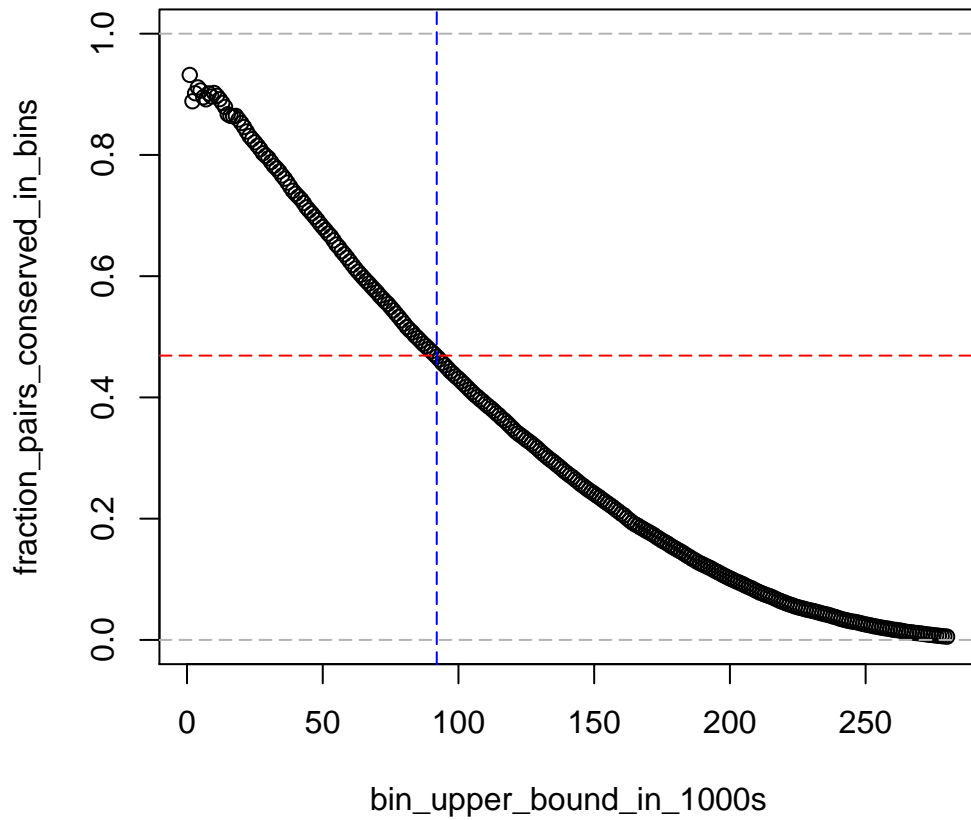

**Bin\_conservation\_minus\_bg\_GM0701.1\_vs\_NE-JV-3**  
**PD-0.062407**

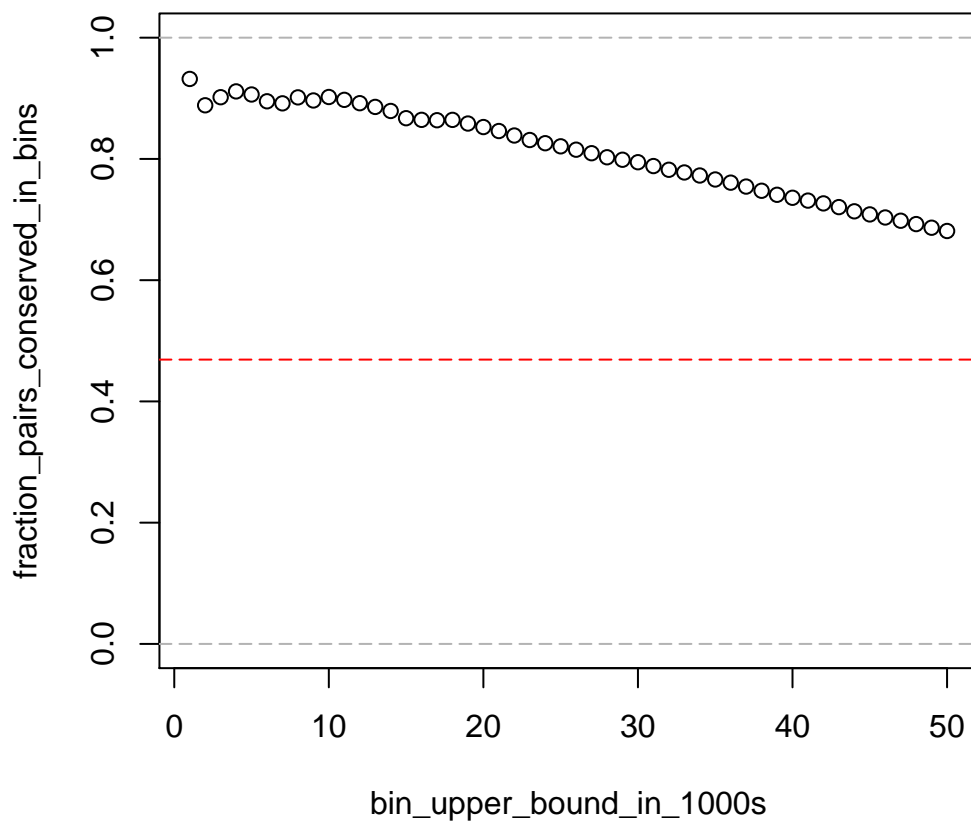

Supplement: s1 [file s1]

**Bin\_conservation\_minus\_bg\_CvsA1\_vs\_NE-JV-3**  
**PD-0.695212**

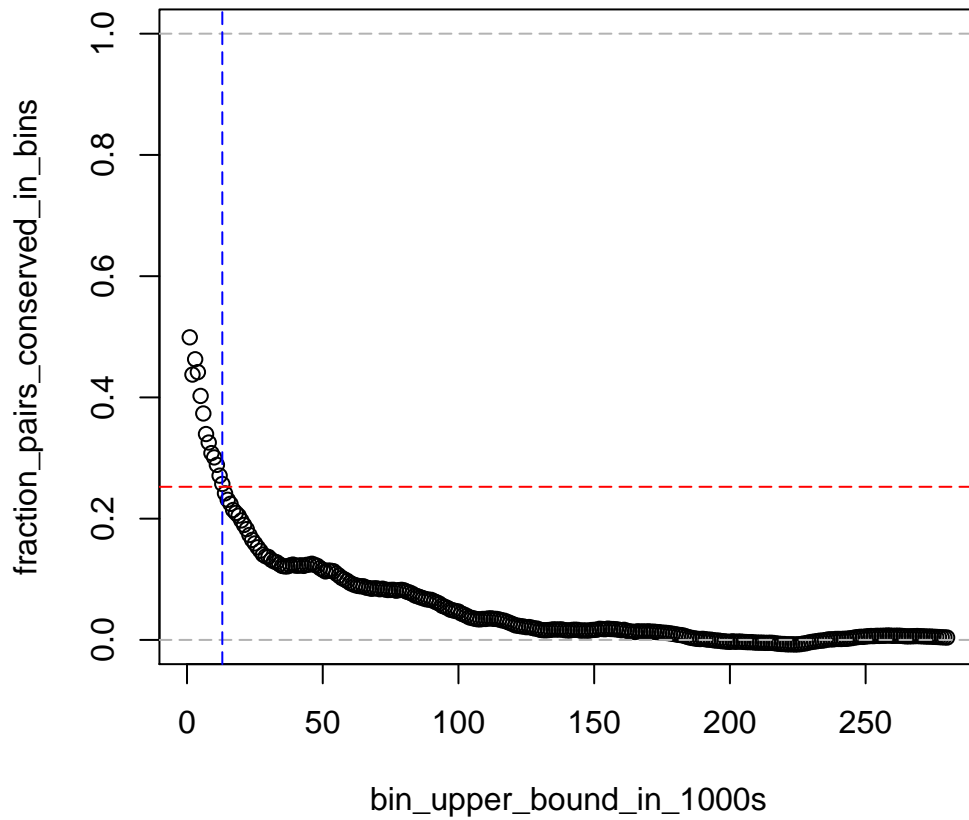

**Bin\_conservation\_minus\_bg\_CvsA1\_vs\_NE-JV-3**  
**PD-0.695212**

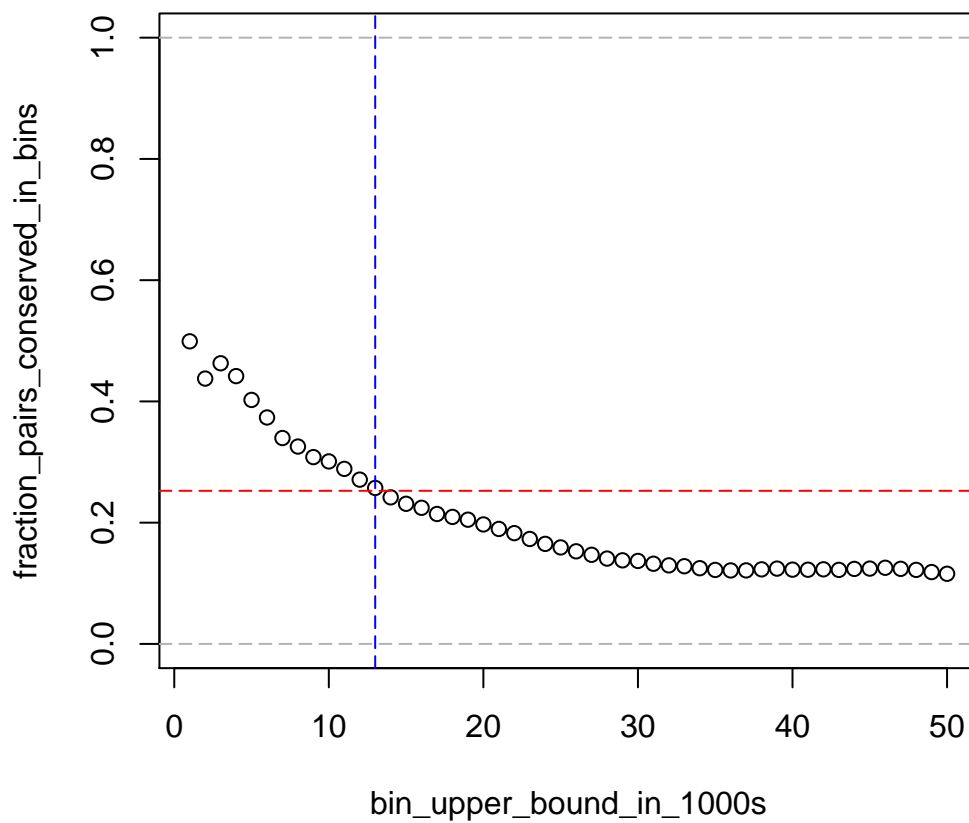

Supplement: s1 [file s1]

**Bin\_conservation\_minus\_bg\_IL-5-2s1\_vs\_MT325**  
**PD-0.6603**

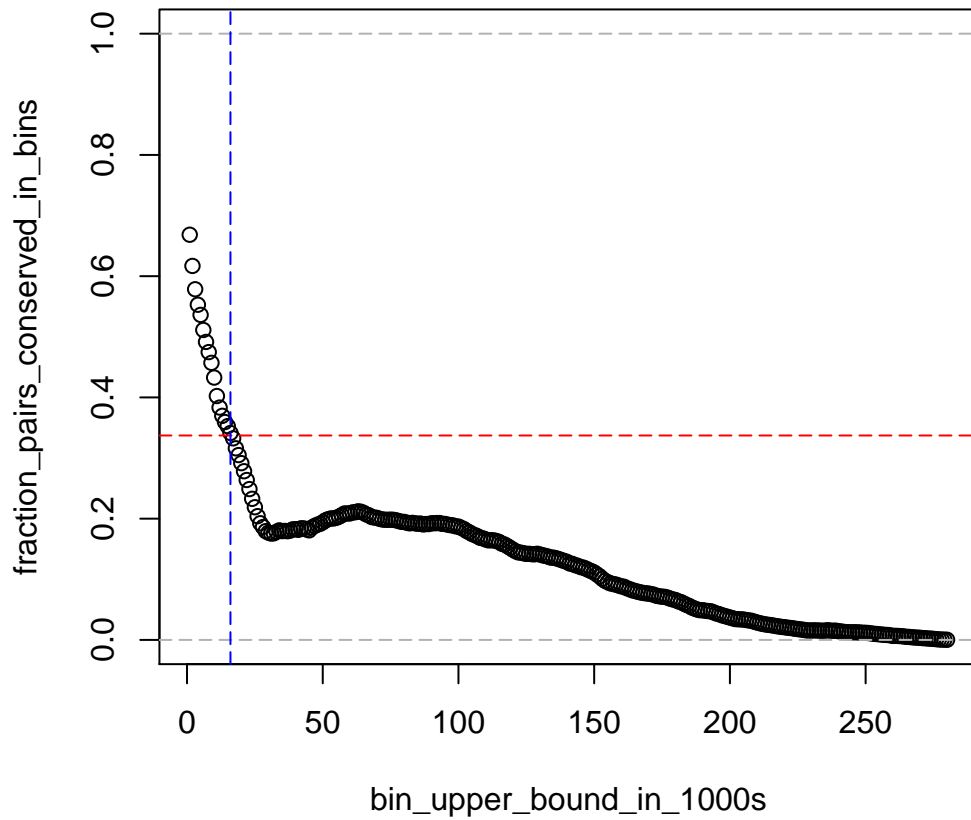

**Bin\_conservation\_minus\_bg\_IL-5-2s1\_vs\_MT325**  
**PD-0.6603**

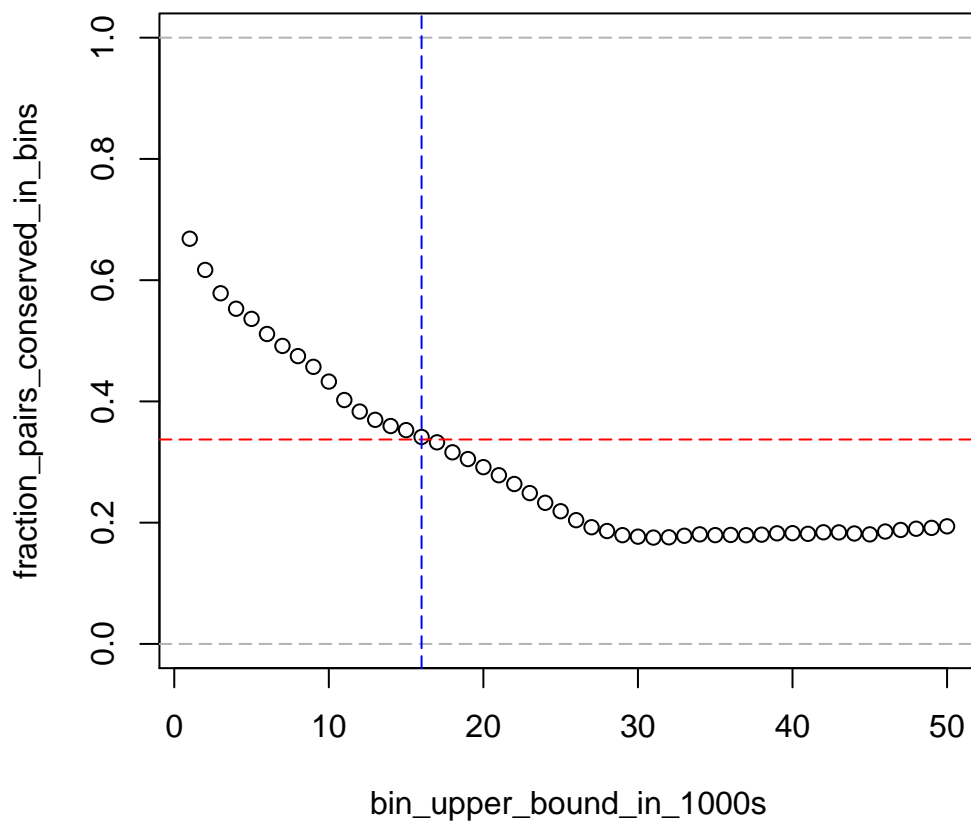

Supplement: s1 [file s1]

**Bin\_conservation\_minus\_bg\_CVR-1\_vs\_OR0704.2.2**  
**PD-0.033573**

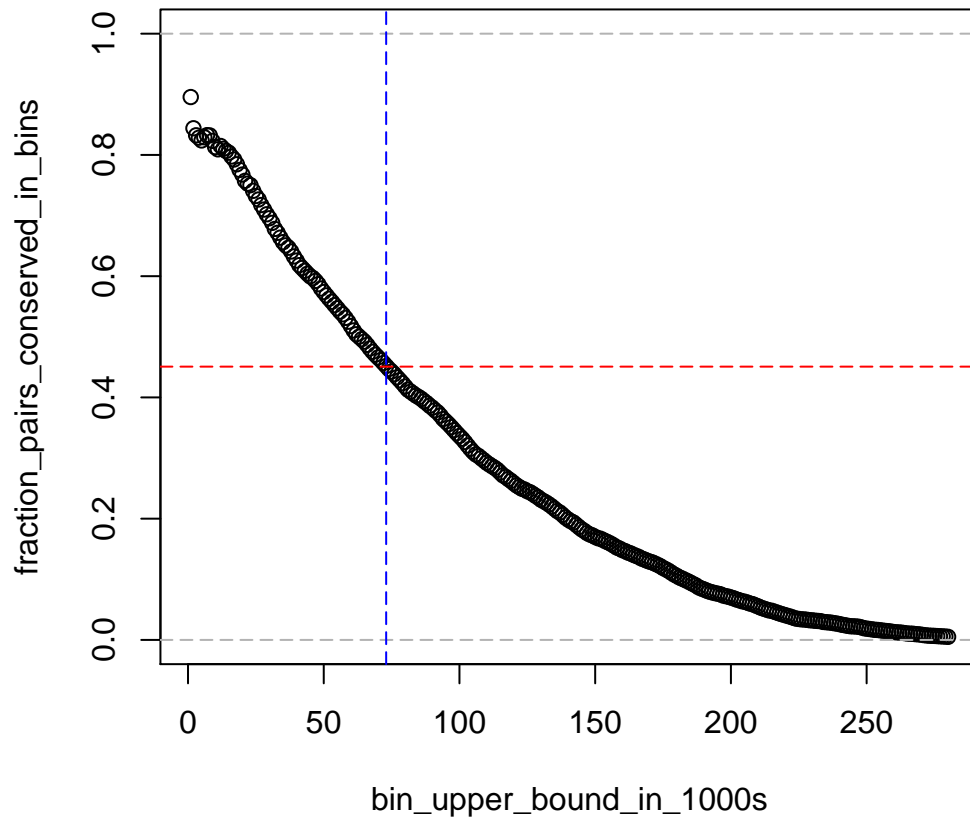

**Bin\_conservation\_minus\_bg\_CVR-1\_vs\_OR0704.2.2**  
**PD-0.033573**

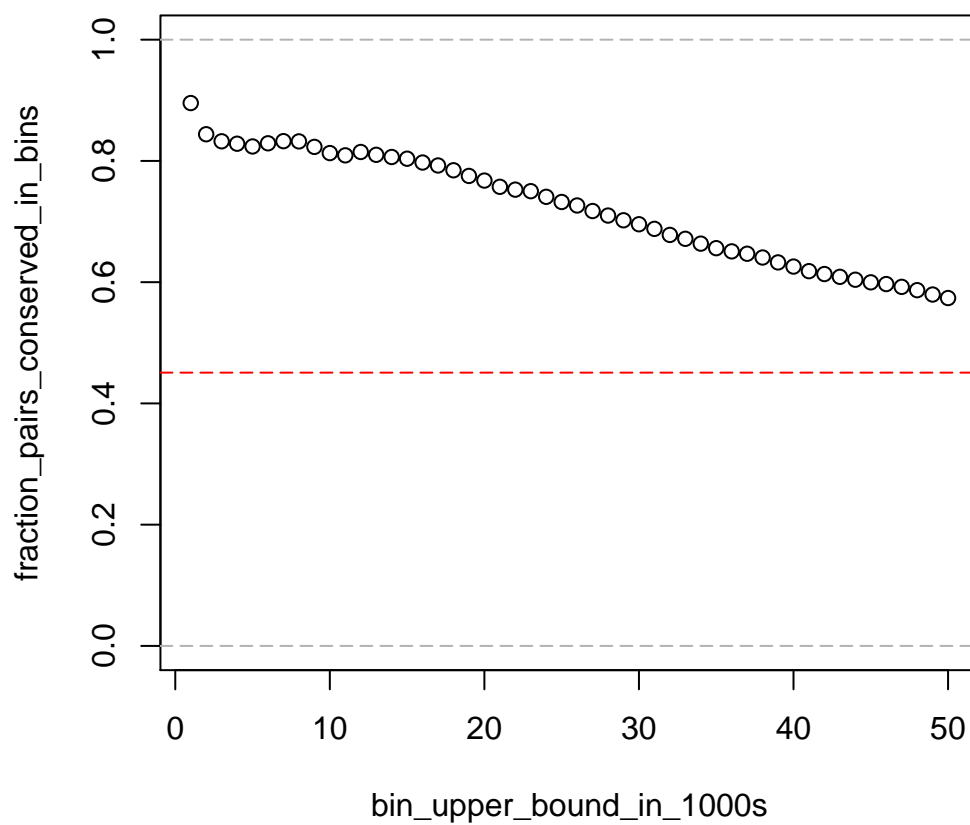

Supplement: s1 [file s1]

**Bin\_conservation\_minus\_bg\_MA-1E\_vs\_WI0606**  
**PD-0.698699**

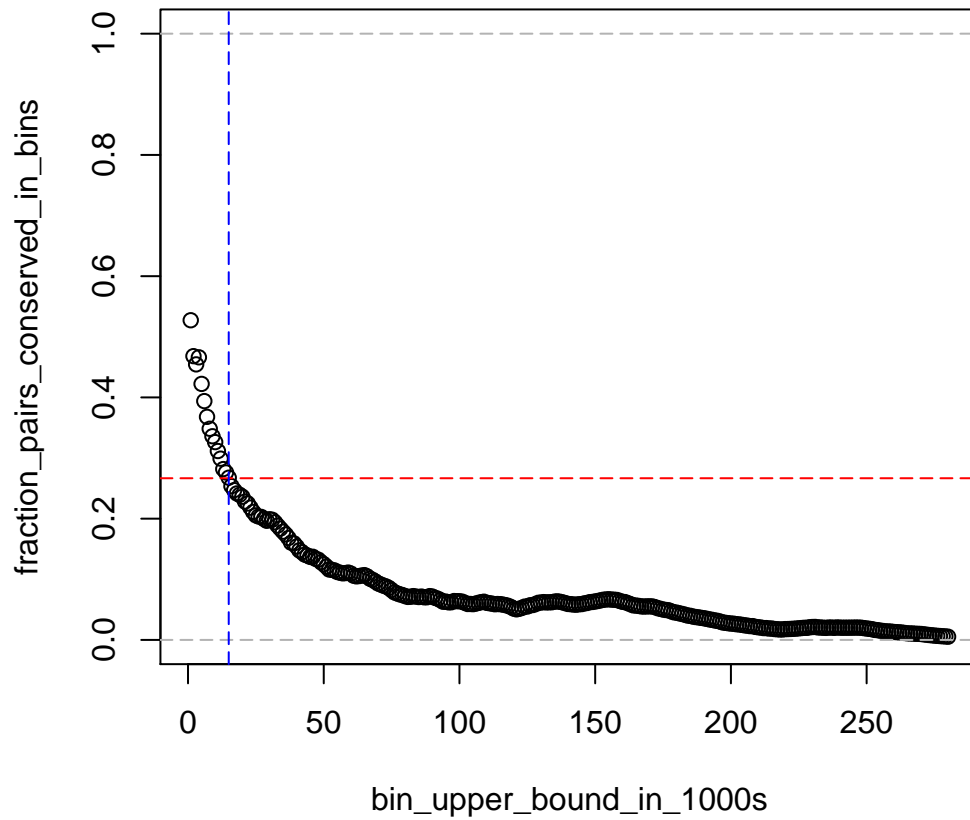

**Bin\_conservation\_minus\_bg\_MA-1E\_vs\_WI0606**  
**PD-0.698699**

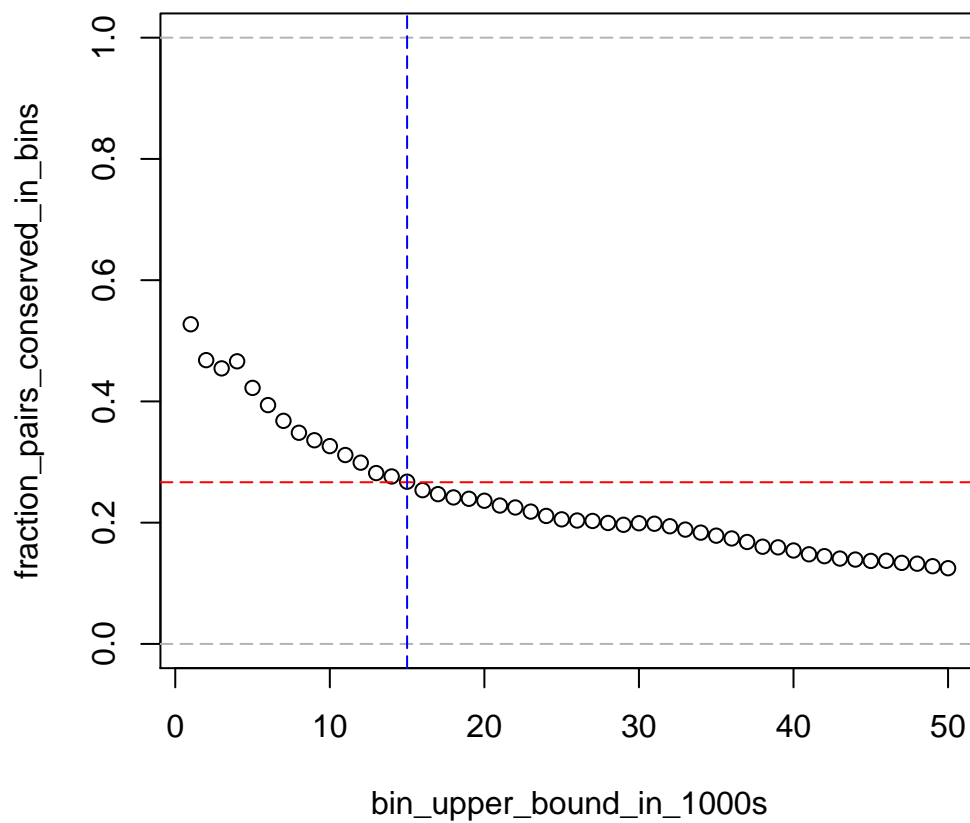

Supplement: s1 [file s1]

**Bin\_conservation\_minus\_bg\_NY-2B\_vs\_PBCV1**  
**PD-0.132796**

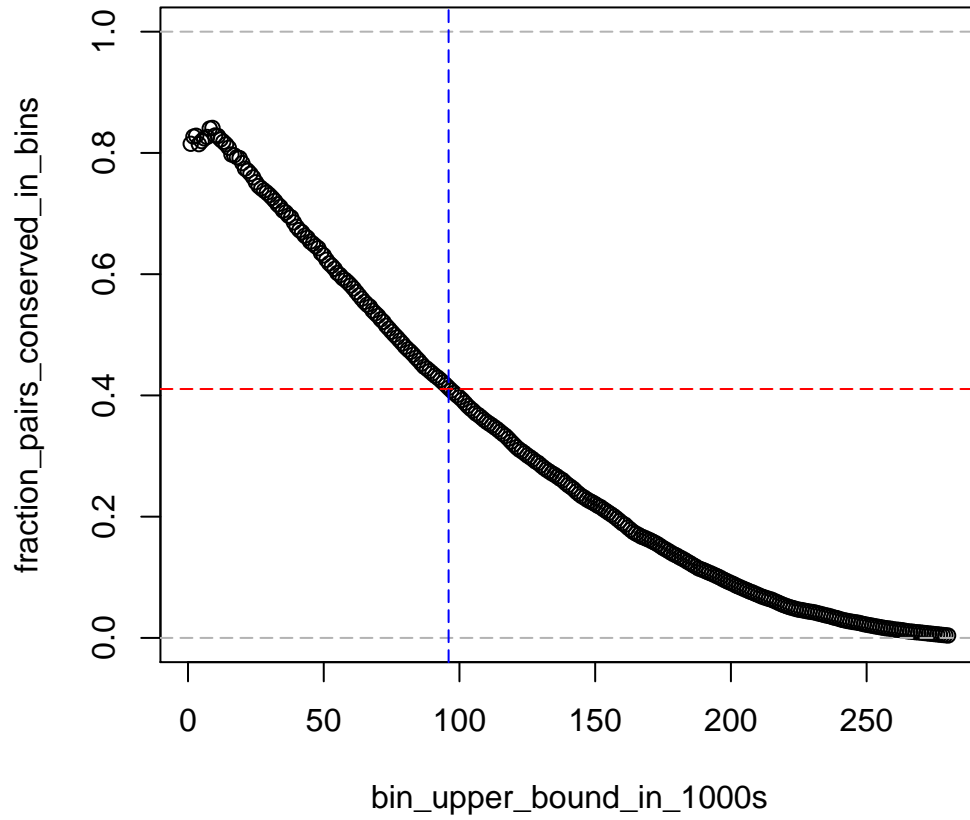

**Bin\_conservation\_minus\_bg\_NY-2B\_vs\_PBCV1**  
**PD-0.132796**

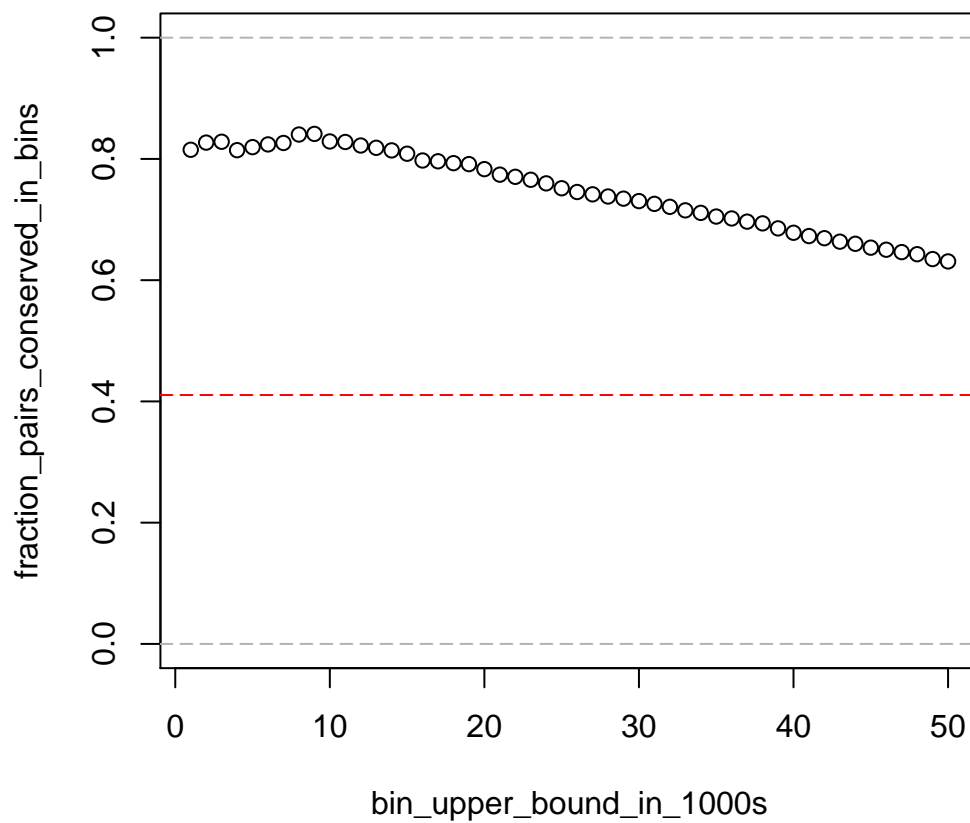

Supplement: s1 [file s1]

**Bin\_conservation\_minus\_bg\_AR158\_vs\_NTS-1**  
**PD-0.700378**

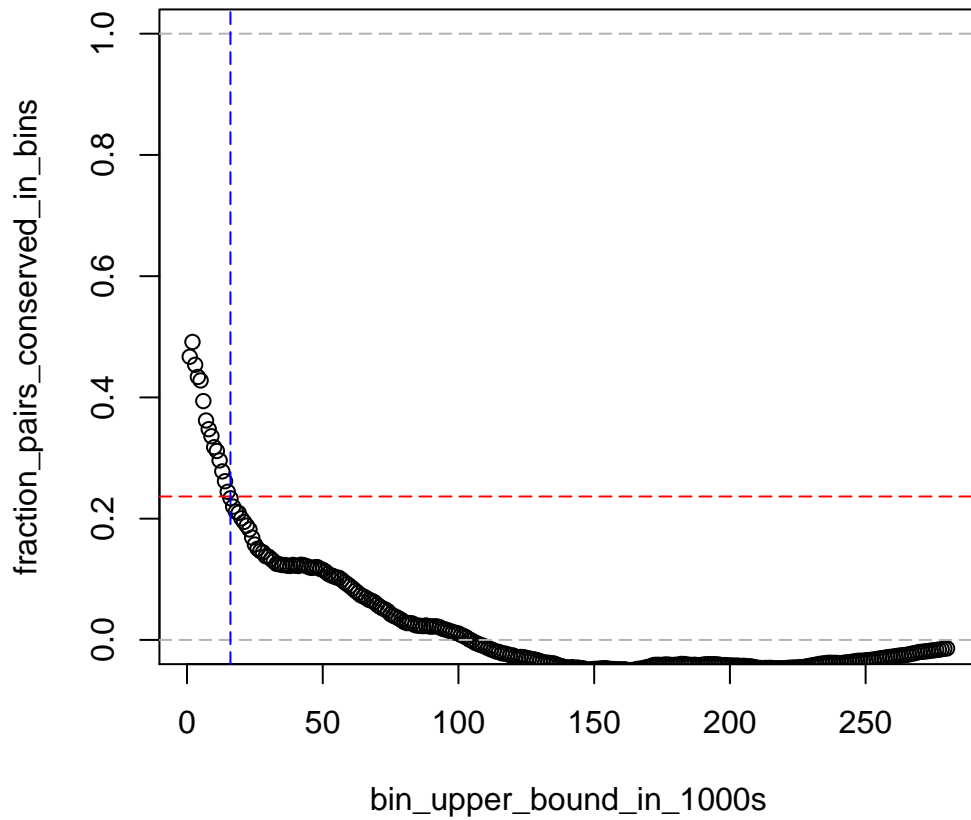

**Bin\_conservation\_minus\_bg\_AR158\_vs\_NTS-1**  
**PD-0.700378**

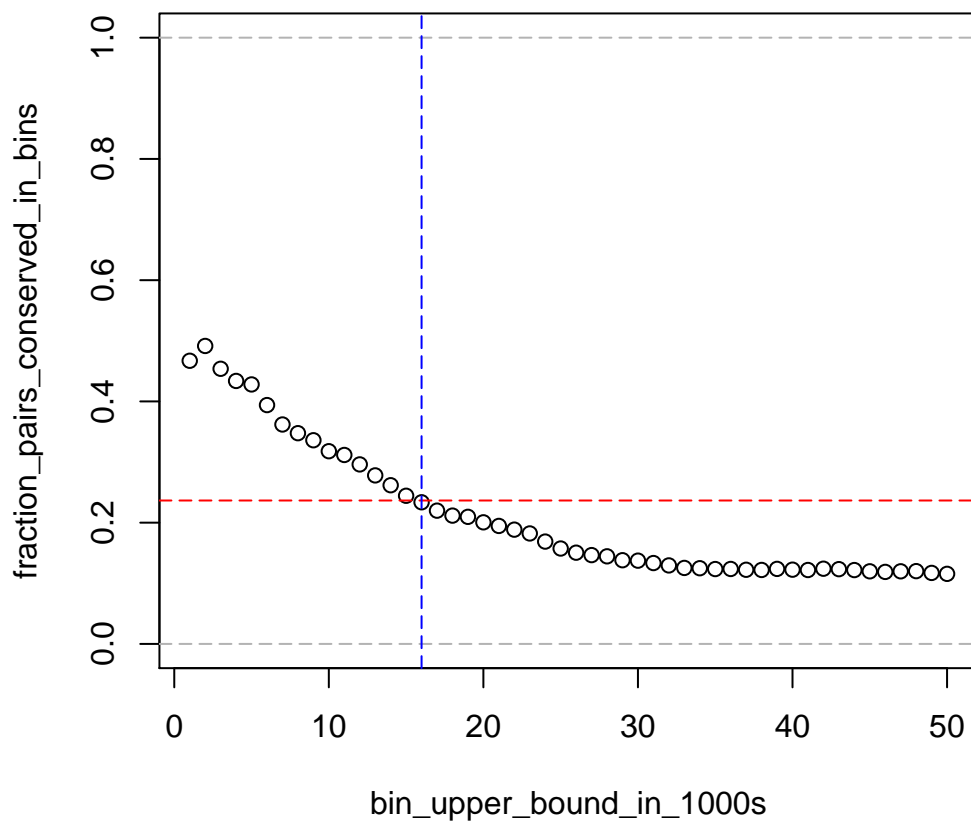

Supplement: s1 [file s1]

**Bin\_conservation\_minus\_bg\_MT325\_vs\_WI0606**  
**PD-0.463047**

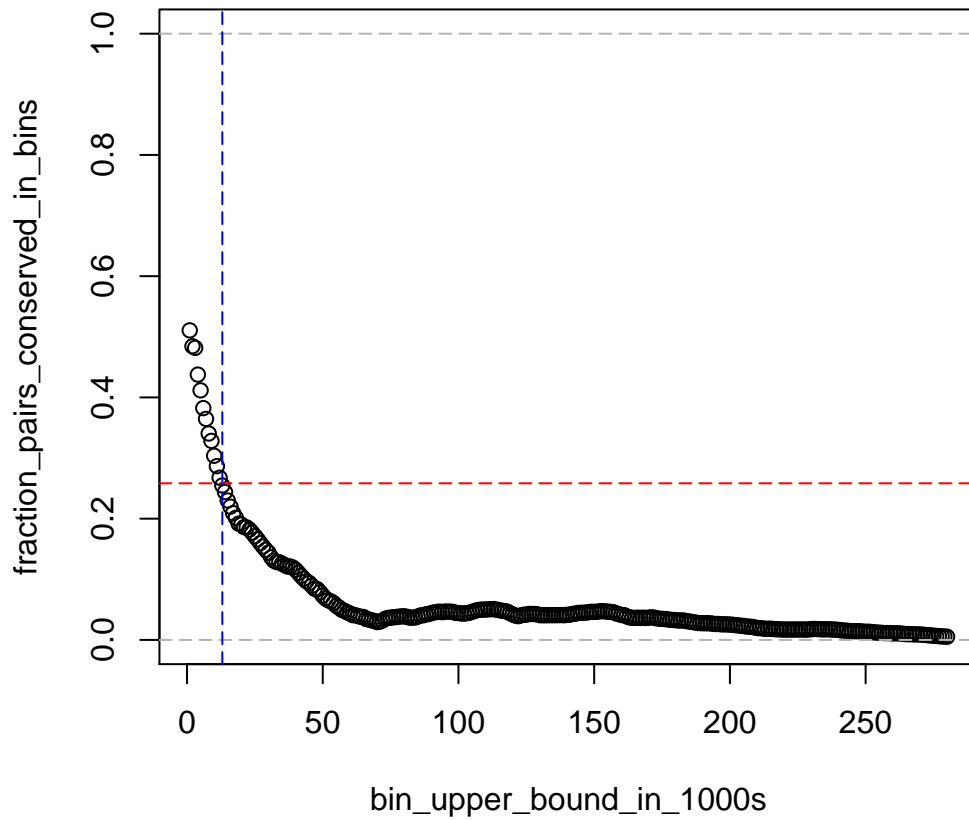

**Bin\_conservation\_minus\_bg\_MT325\_vs\_WI0606**  
**PD-0.463047**

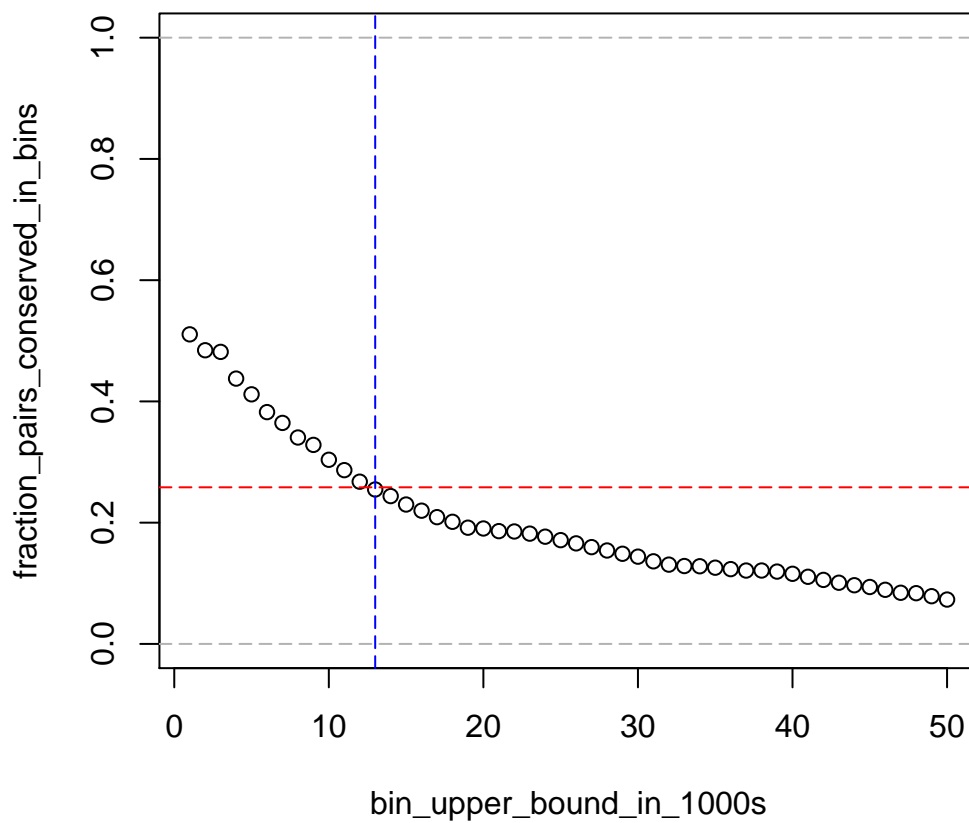

Supplement: s1 [file s1]

**Bin\_conservation\_minus\_bg\_CZ-2\_vs\_GM0701.1**  
**PD-0.454738**

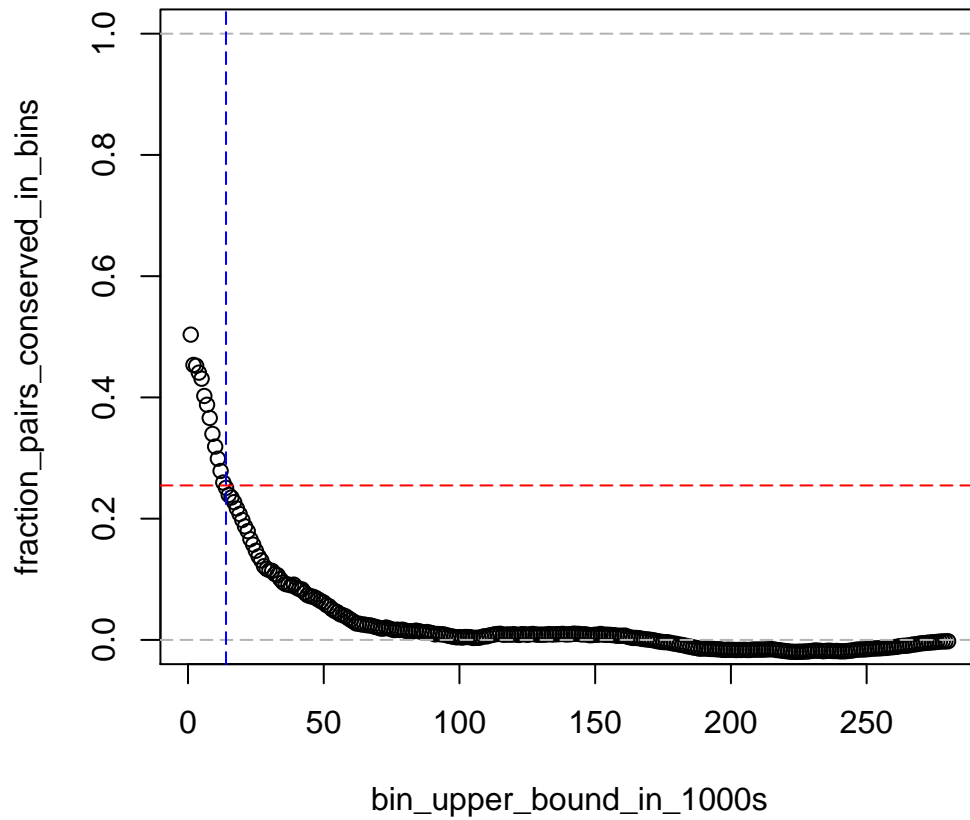

**Bin\_conservation\_minus\_bg\_CZ-2\_vs\_GM0701.1**  
**PD-0.454738**

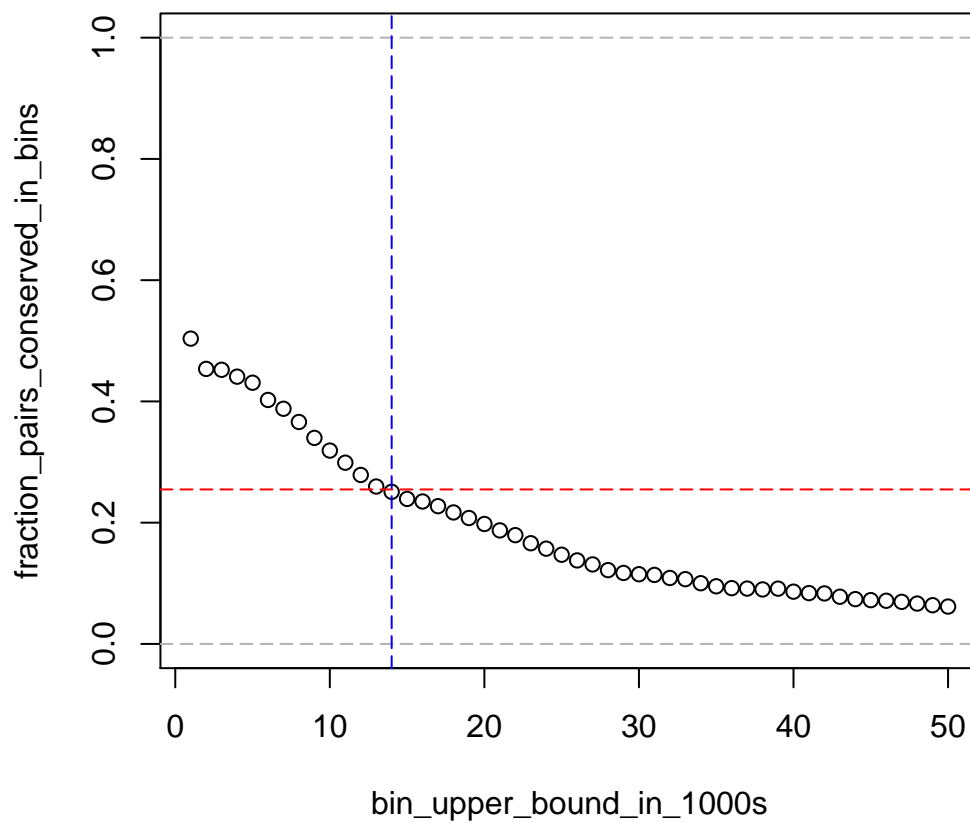

Supplement: s1 [file s1]

**Bin\_conservation\_minus\_bg\_MT325\_vs\_NE-JV-4**  
**PD-0.638592**

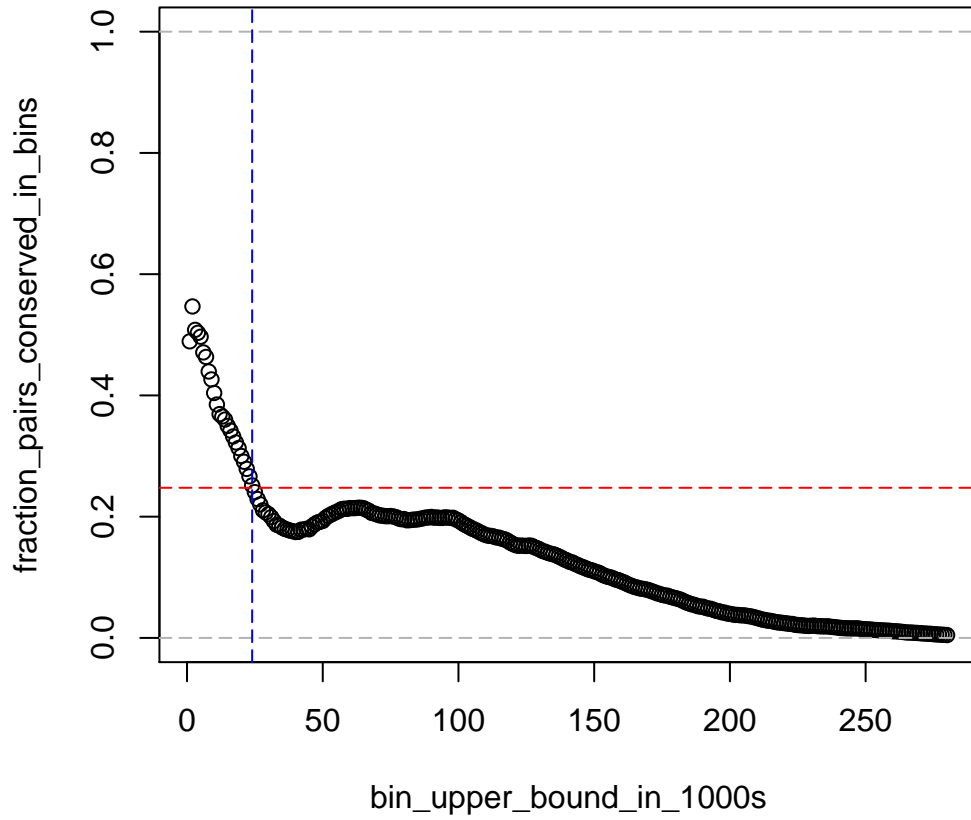

**Bin\_conservation\_minus\_bg\_MT325\_vs\_NE-JV-4**  
**PD-0.638592**

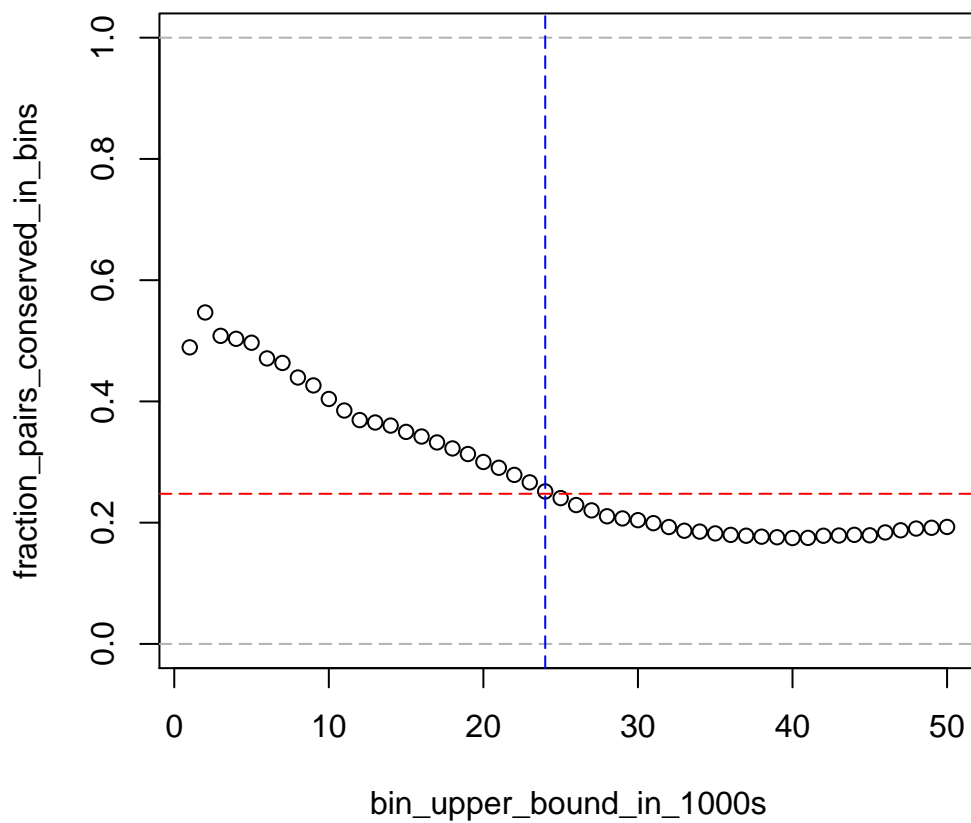

Supplement: s1 [file s1]

**Bin\_conservation\_minus\_bg\_IL-5-2s1\_vs\_PBCV1**  
**PD-0.130805**

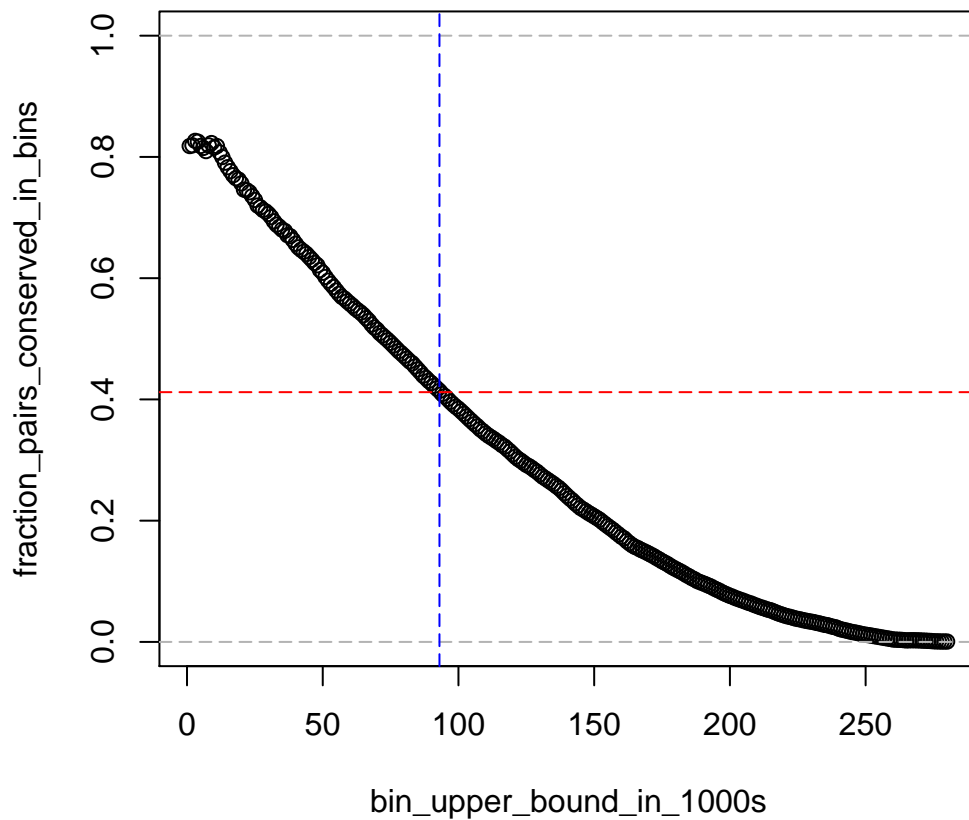

**Bin\_conservation\_minus\_bg\_IL-5-2s1\_vs\_PBCV1**  
**PD-0.130805**

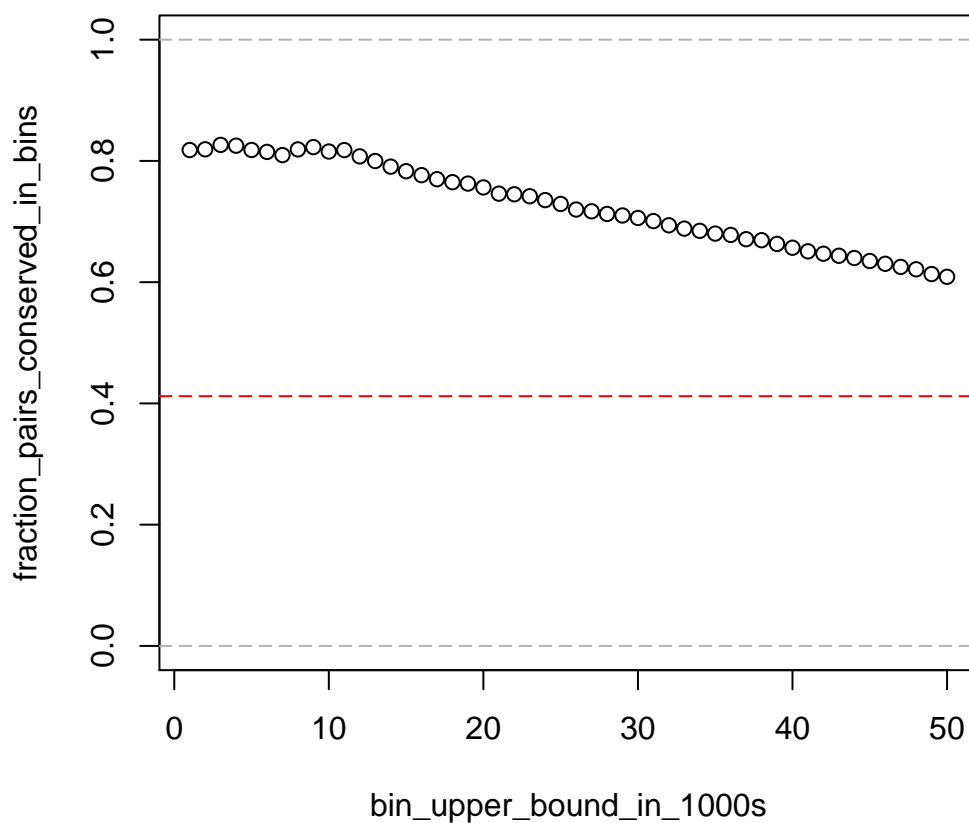

Supplement: s1 [file s1]

**Bin\_conservation\_minus\_bg\_NE-JV-2\_vs\_NE-JV-4**  
**PD-0.681601**

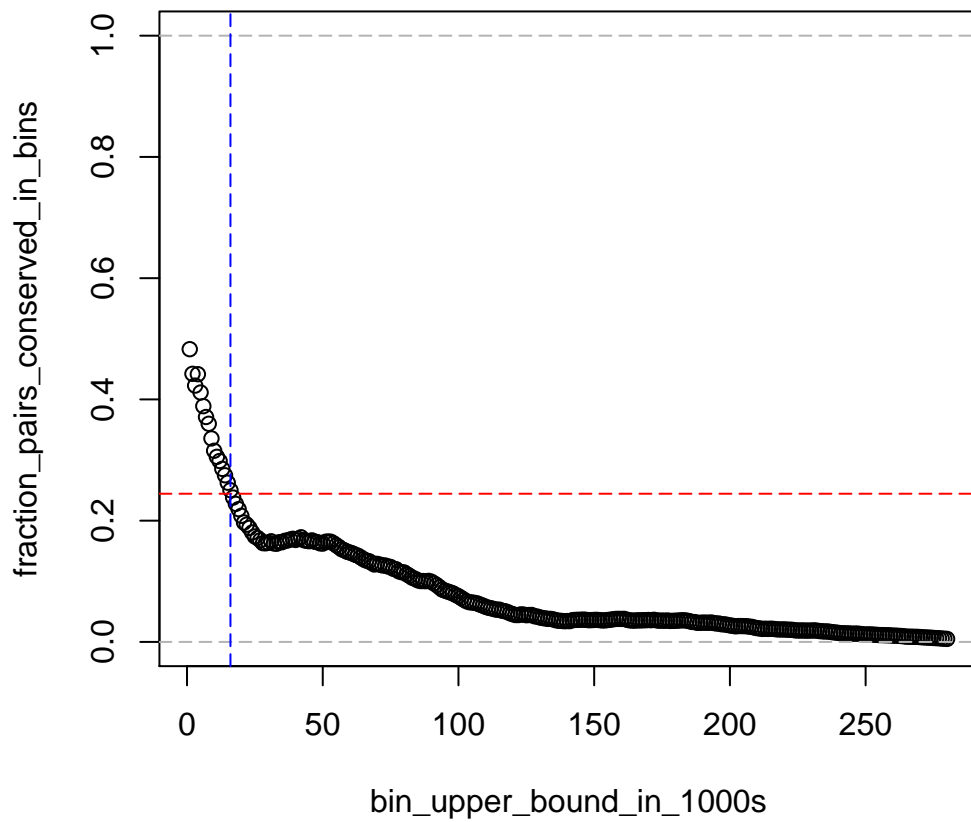

**Bin\_conservation\_minus\_bg\_NE-JV-2\_vs\_NE-JV-4**  
**PD-0.681601**

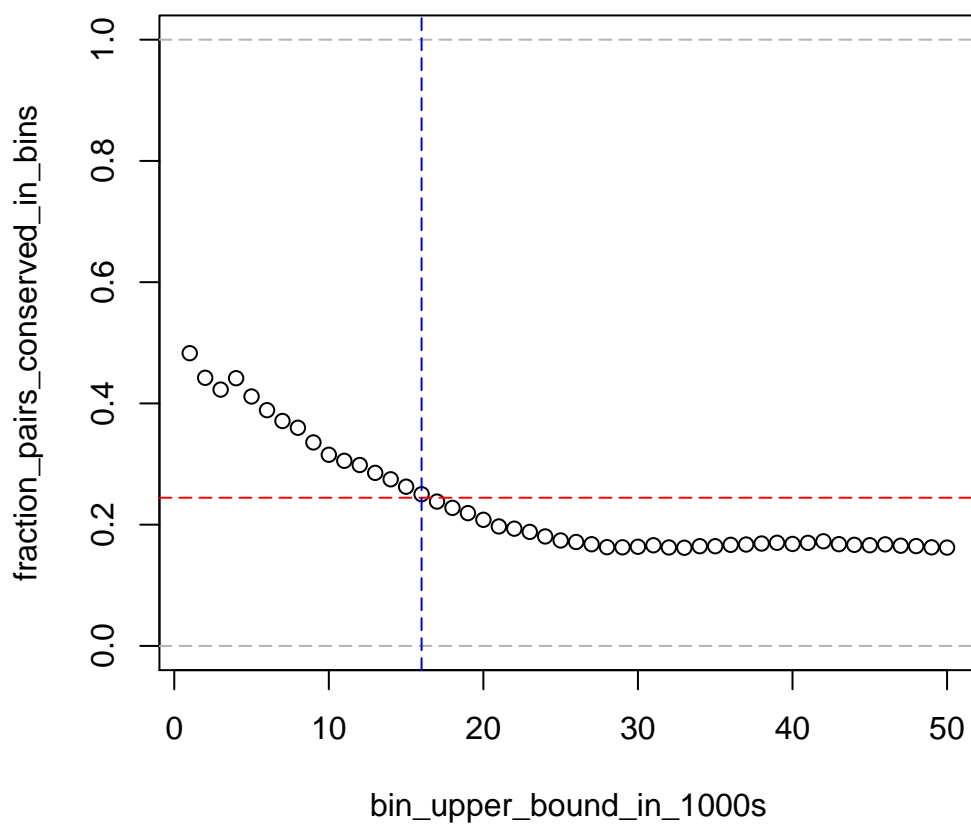

Supplement: s1 [file s1]

**Bin\_conservation\_minus\_bg\_Can0610SP\_vs\_FR483**  
**PD-0.465329**

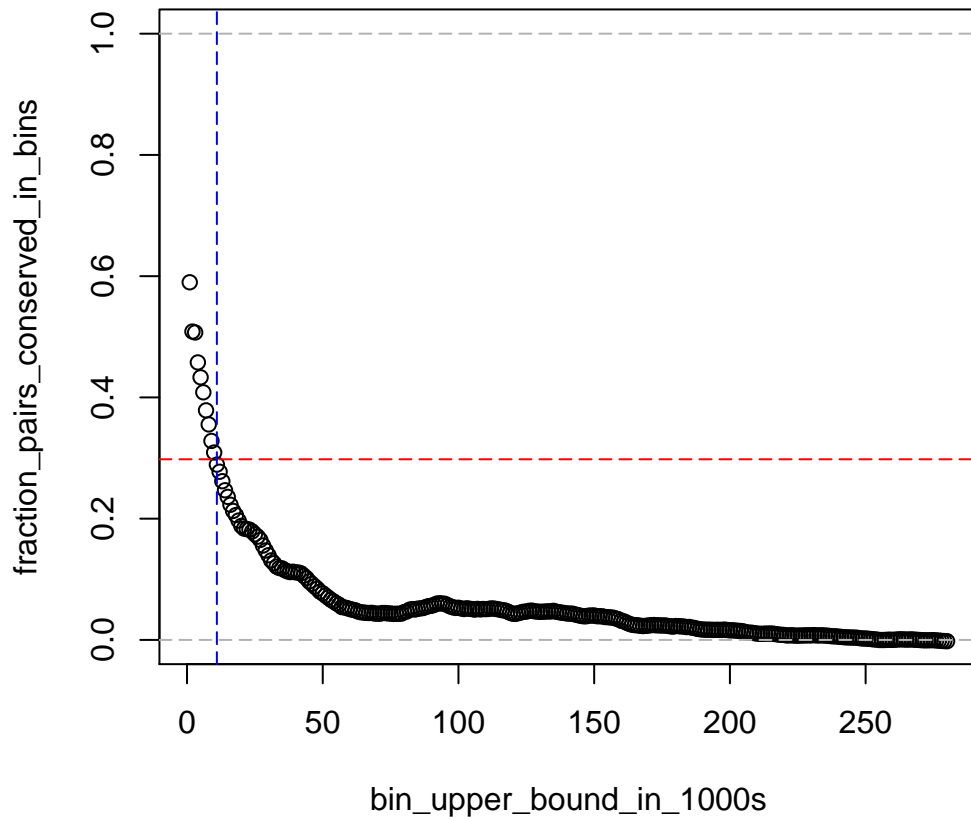

**Bin\_conservation\_minus\_bg\_Can0610SP\_vs\_FR483**  
**PD-0.465329**

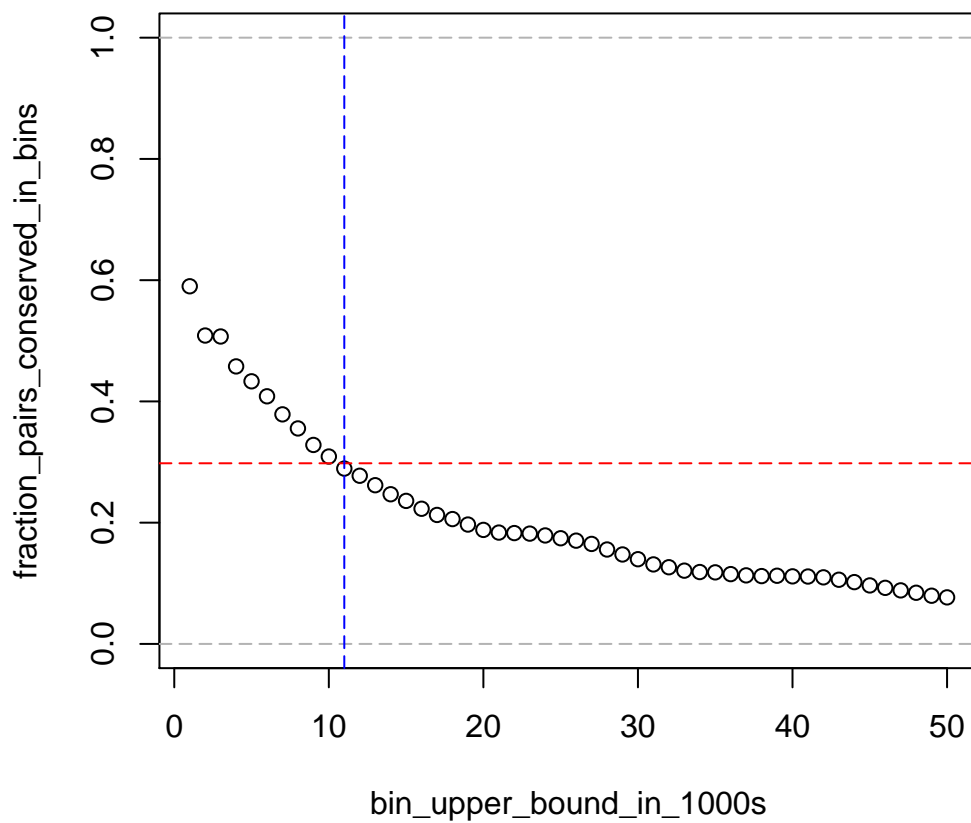

Supplement: s1 [file s1]

**Bin\_conservation\_minus\_bg\_AP110A\_vs\_PBCV1**  
**PD-0.637221**

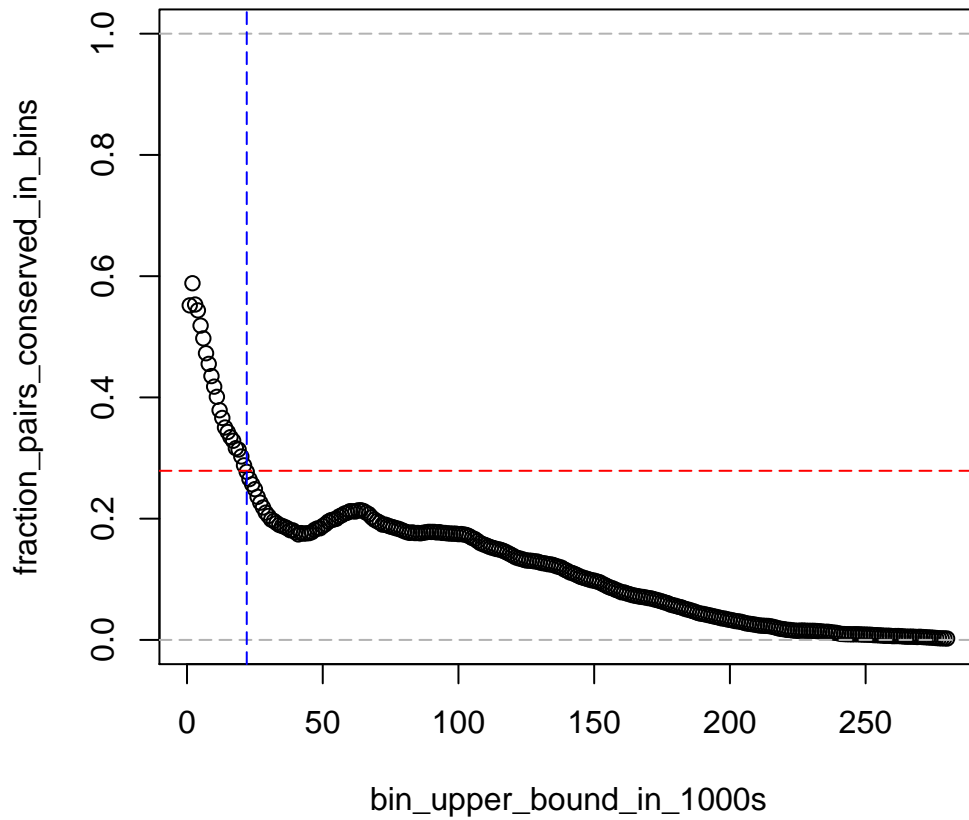

**Bin\_conservation\_minus\_bg\_AP110A\_vs\_PBCV1**  
**PD-0.637221**

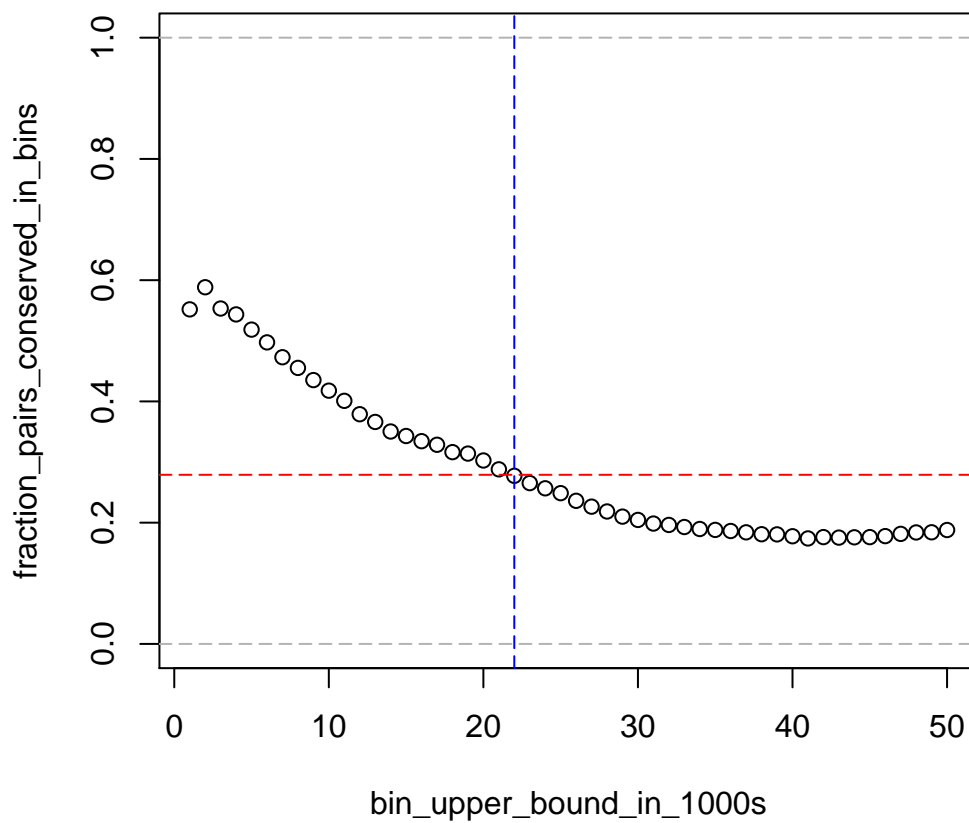

Supplement: s1 [file s1]

**Bin\_conservation\_minus\_bg\_KS1B\_vs\_NE-JV-3**  
**PD-0.693972**

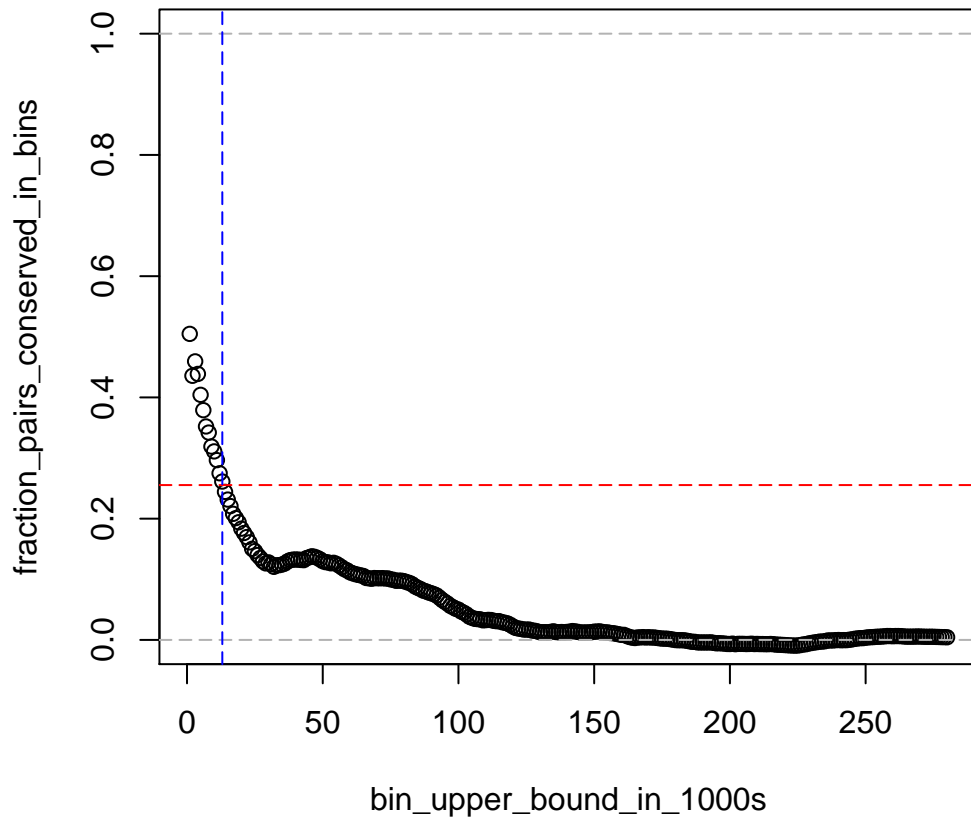

**Bin\_conservation\_minus\_bg\_KS1B\_vs\_NE-JV-3**  
**PD-0.693972**

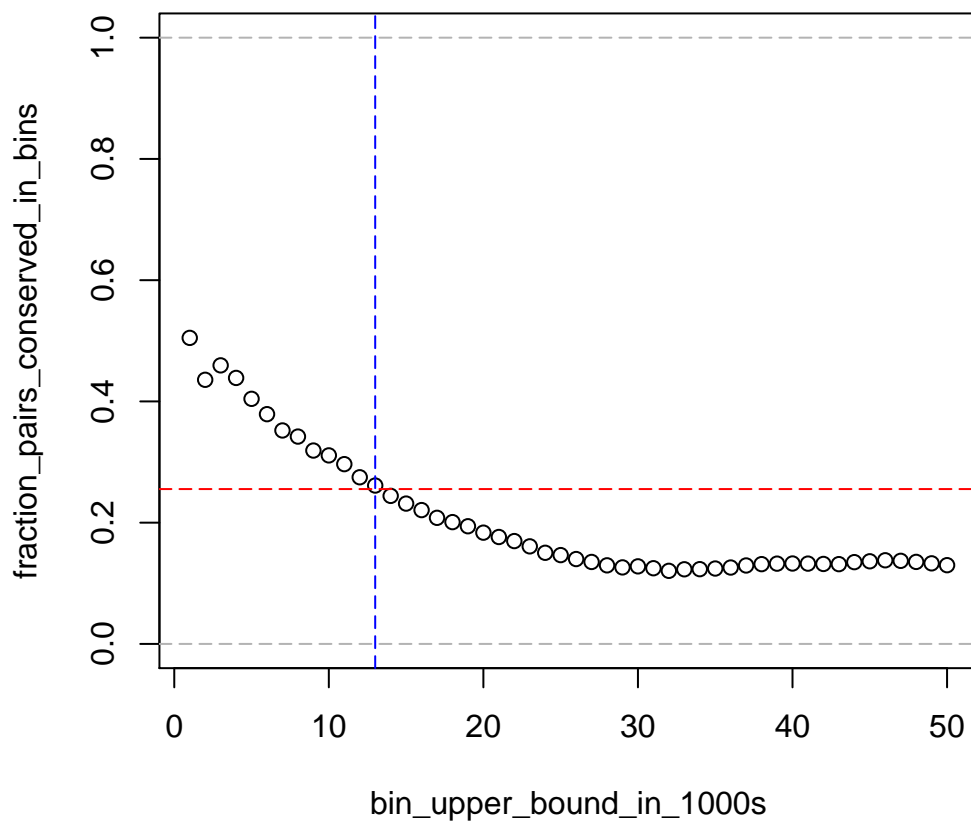

Supplement: s1 [file s1]

**Bin\_conservation\_minus\_bg\_CVA-1\_vs\_KS1B**  
**PD-0.648901**

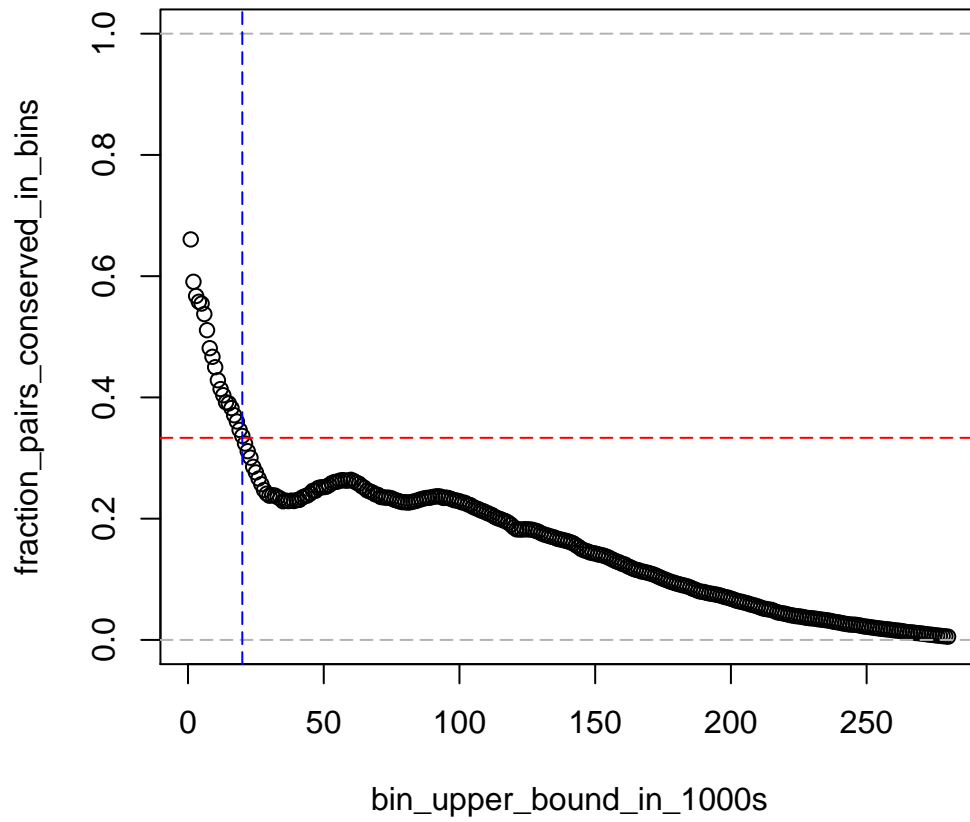

**Bin\_conservation\_minus\_bg\_CVA-1\_vs\_KS1B**  
**PD-0.648901**

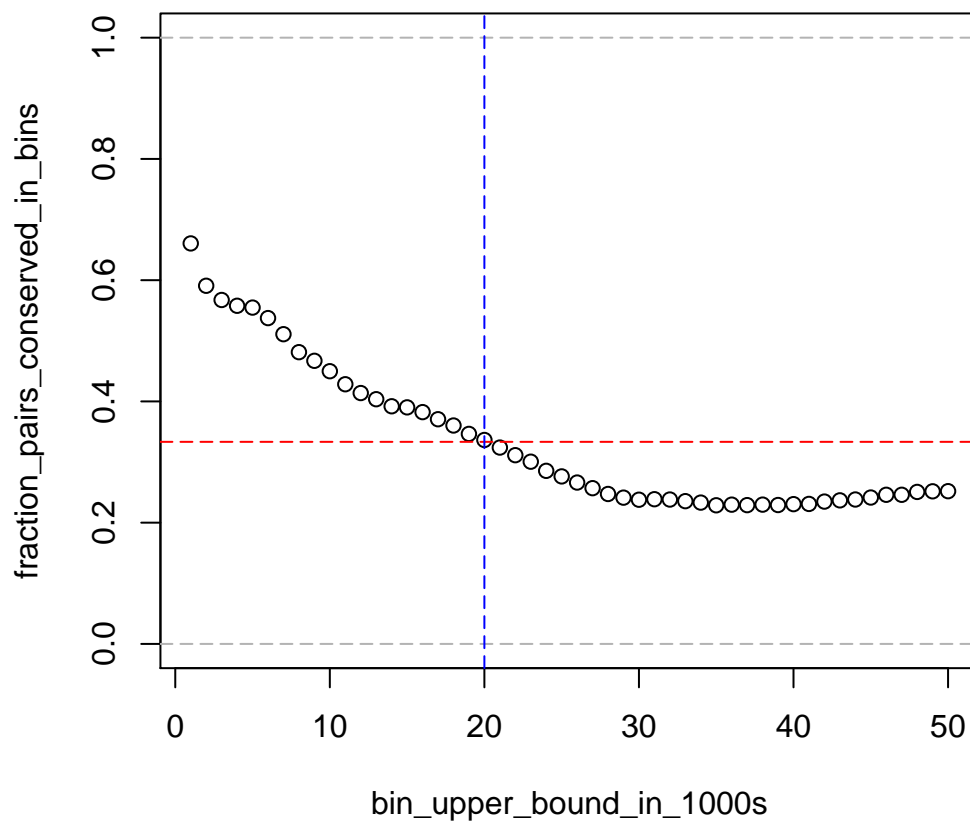

Supplement: s1 [file s1]

**Bin\_conservation\_minus\_bg\_CZ-2\_vs\_NE-JV-3**  
**PD-0.465611**

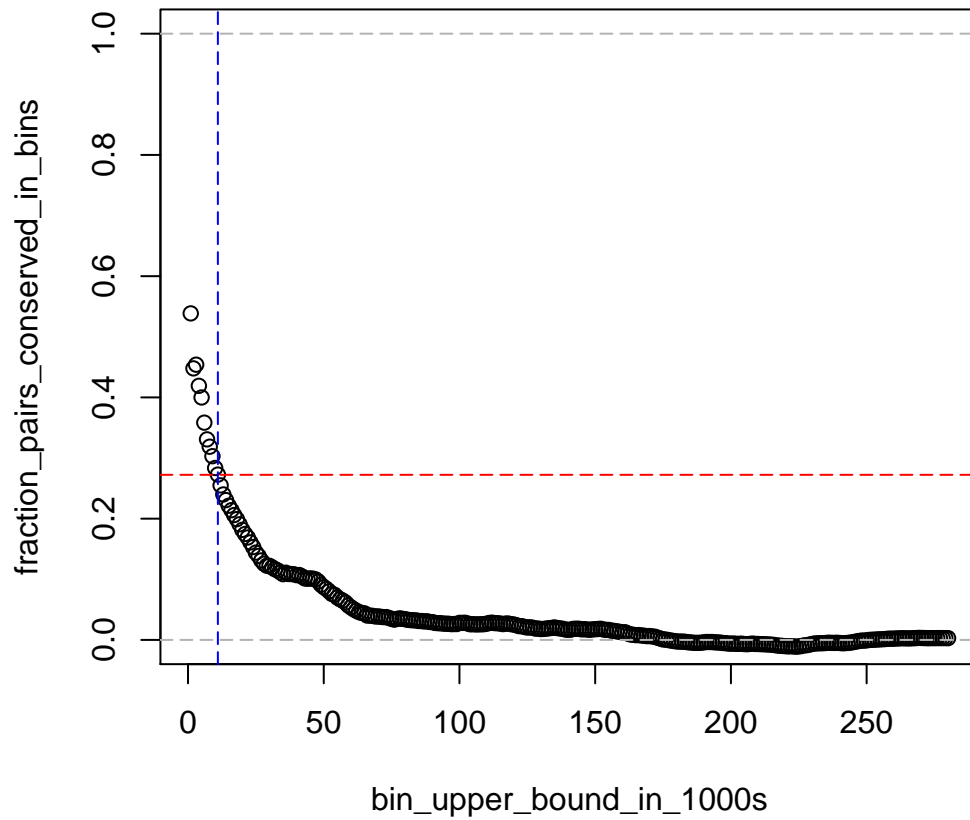

**Bin\_conservation\_minus\_bg\_CZ-2\_vs\_NE-JV-3**  
**PD-0.465611**

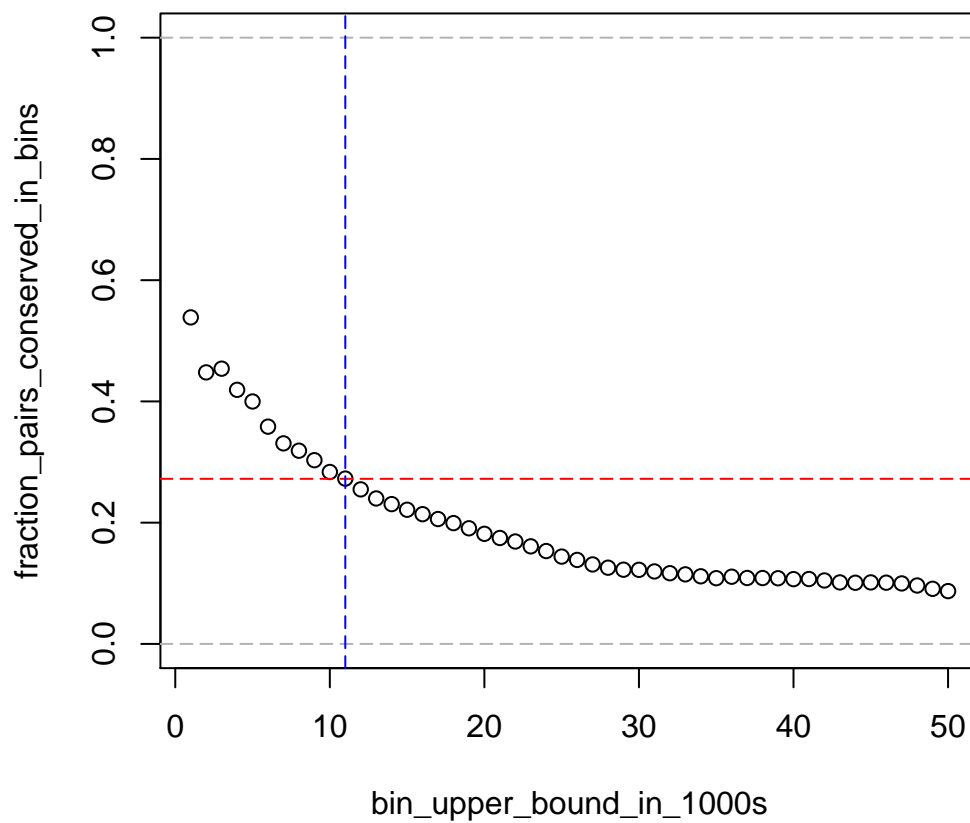

Supplement: s1 [file s1]

**Bin\_conservation\_minus\_bg\_GM0701.1\_vs\_NE-JV-4**  
**PD-0.671373**

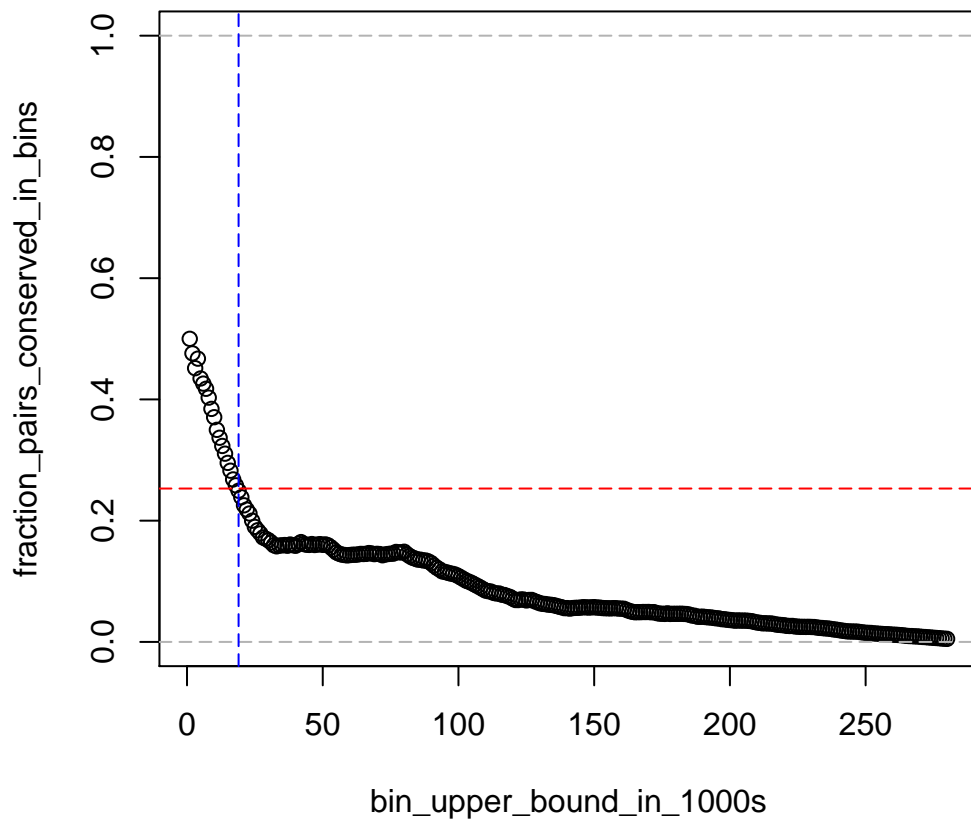

**Bin\_conservation\_minus\_bg\_GM0701.1\_vs\_NE-JV-4**  
**PD-0.671373**

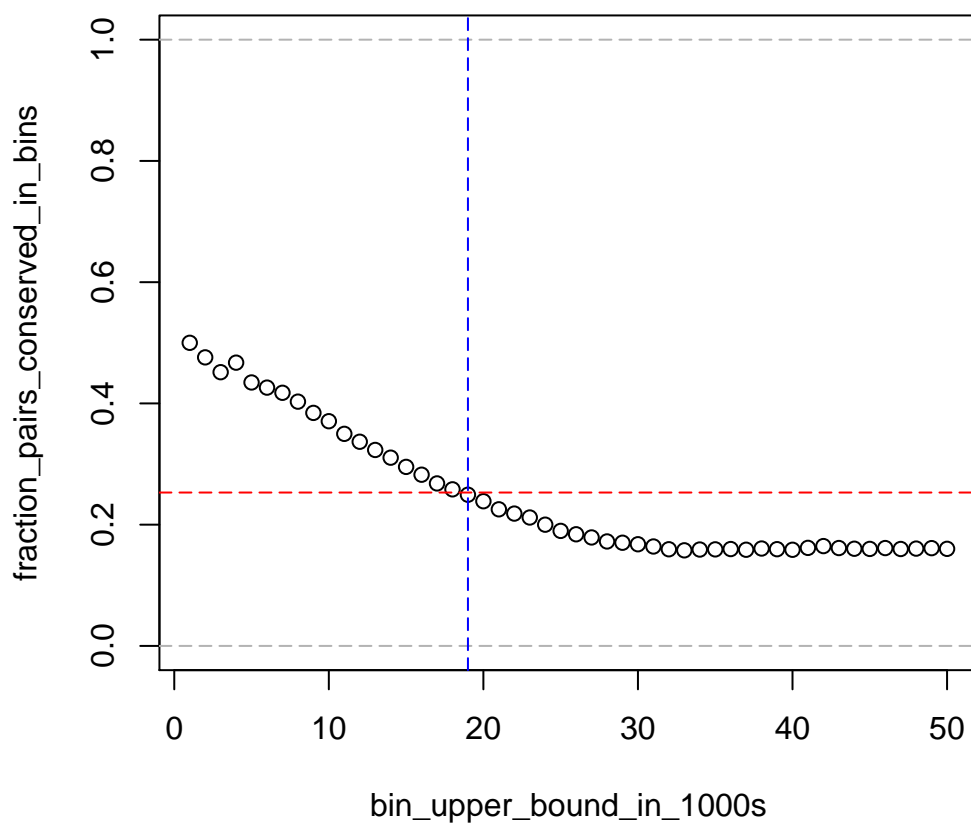

Supplement: s1 [file s1]

**Bin\_conservation\_minus\_bg\_NE-JV-3\_vs\_NE-JV-4**  
**PD-0.682246**

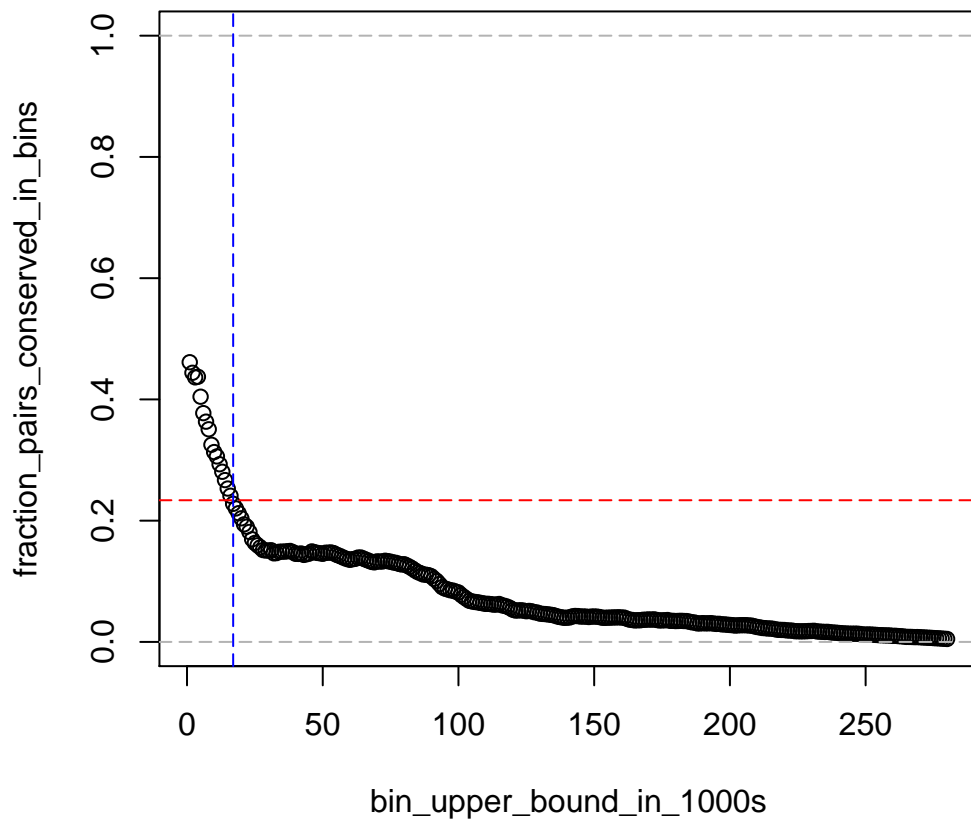

**Bin\_conservation\_minus\_bg\_NE-JV-3\_vs\_NE-JV-4**  
**PD-0.682246**

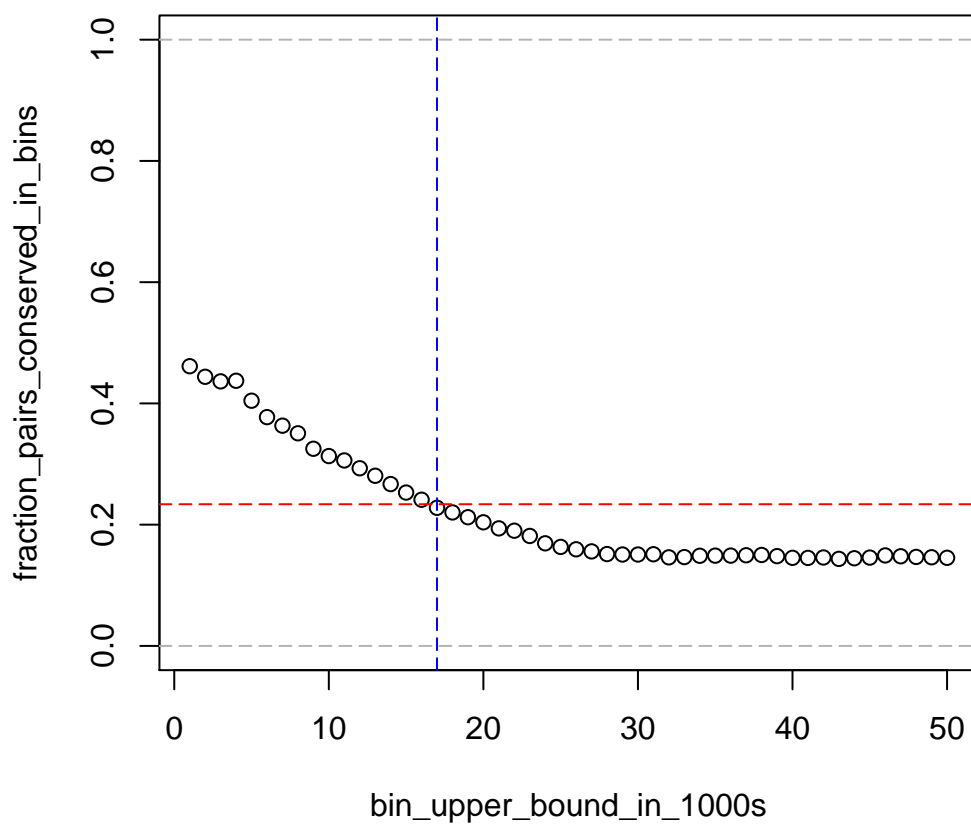

Supplement: s1 [file s1]

**Bin\_conservation\_minus\_bg\_Fr5L\_vs\_NE-JV-3**  
**PD-0.459804**

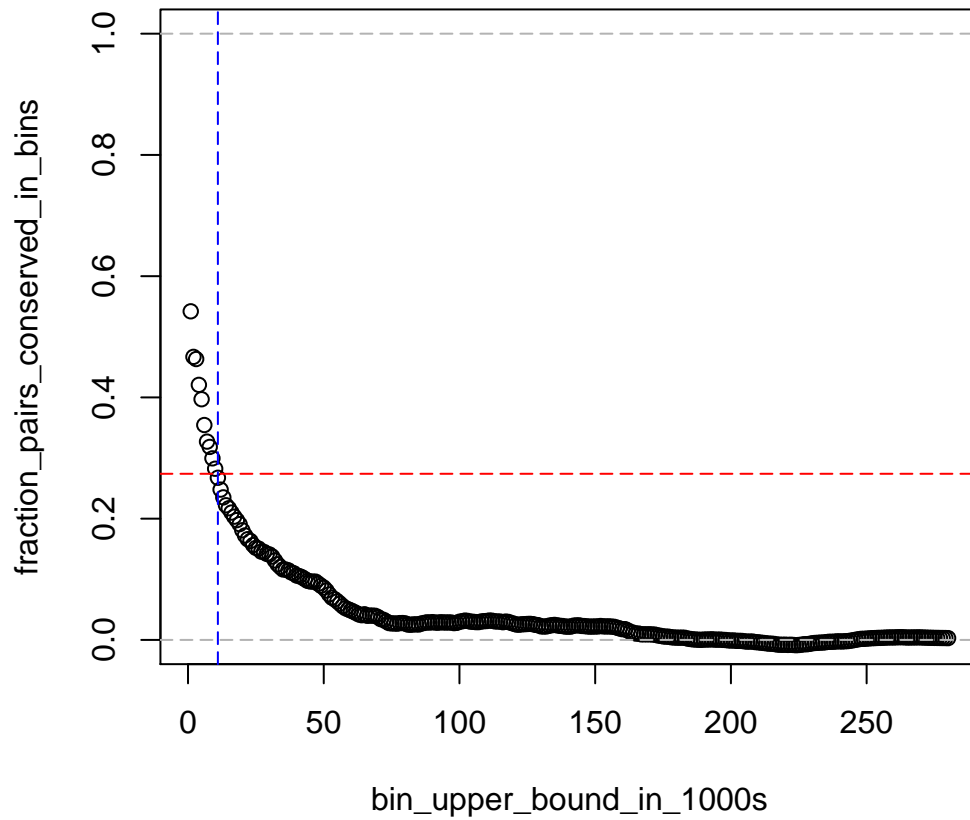

**Bin\_conservation\_minus\_bg\_Fr5L\_vs\_NE-JV-3**  
**PD-0.459804**

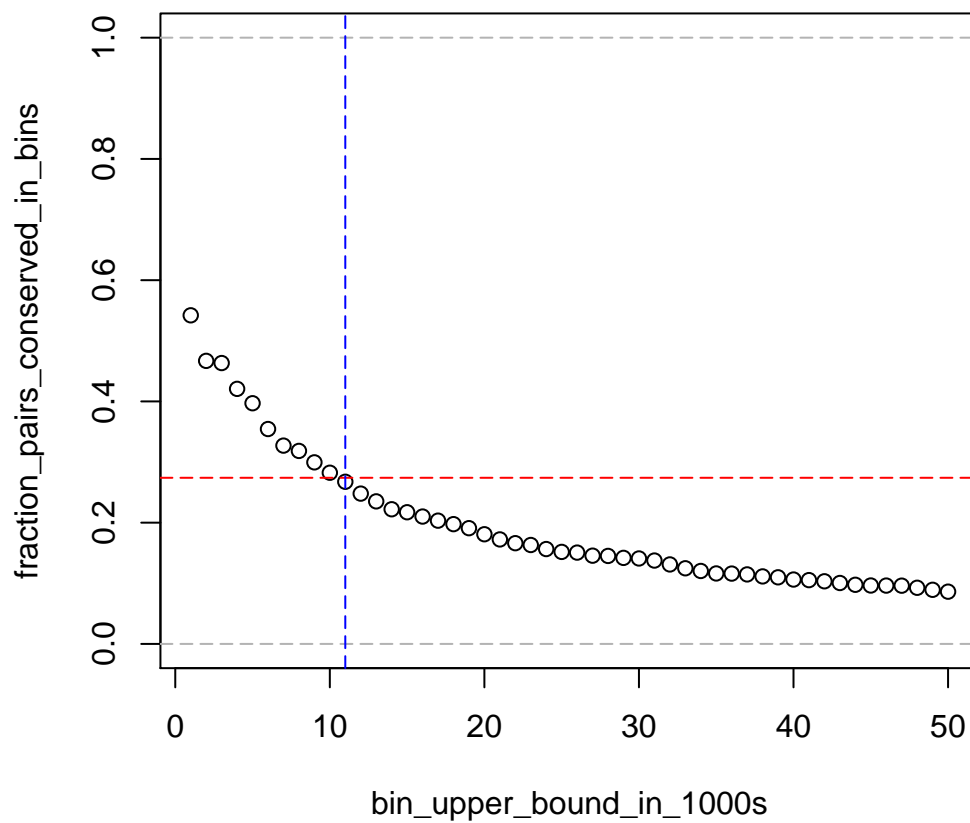

Supplement: s1 [file s1]

**Bin\_conservation\_minus\_bg\_CviKI\_vs\_FR483**  
**PD-0.656562**

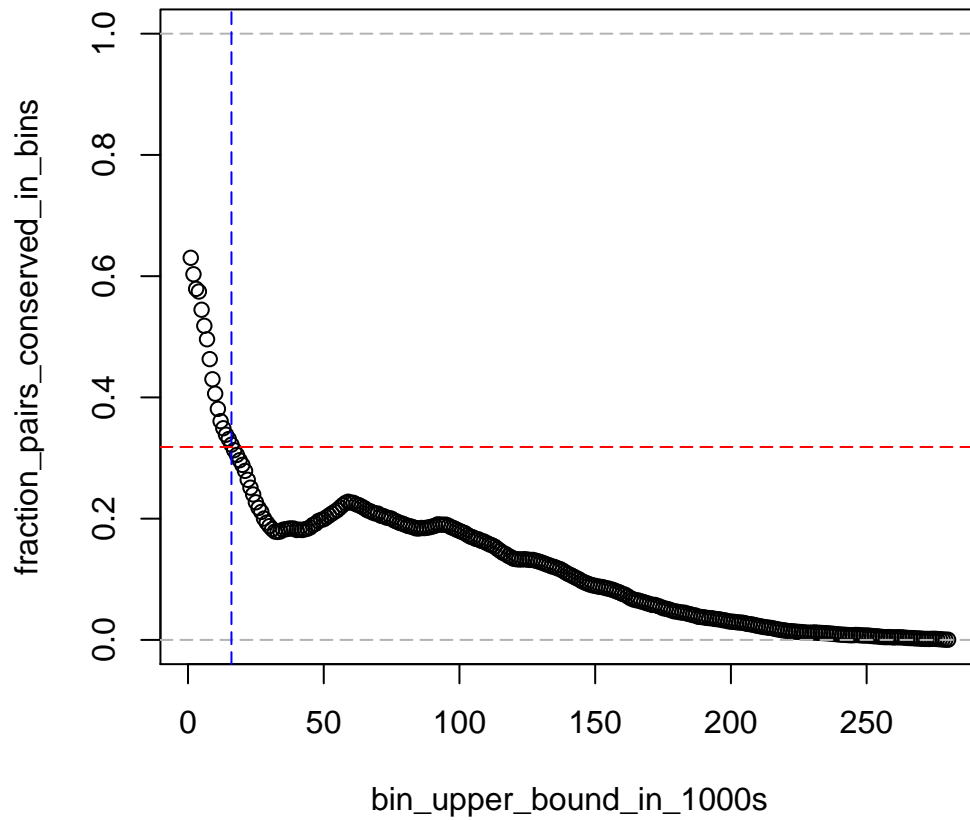

**Bin\_conservation\_minus\_bg\_CviKI\_vs\_FR483**  
**PD-0.656562**

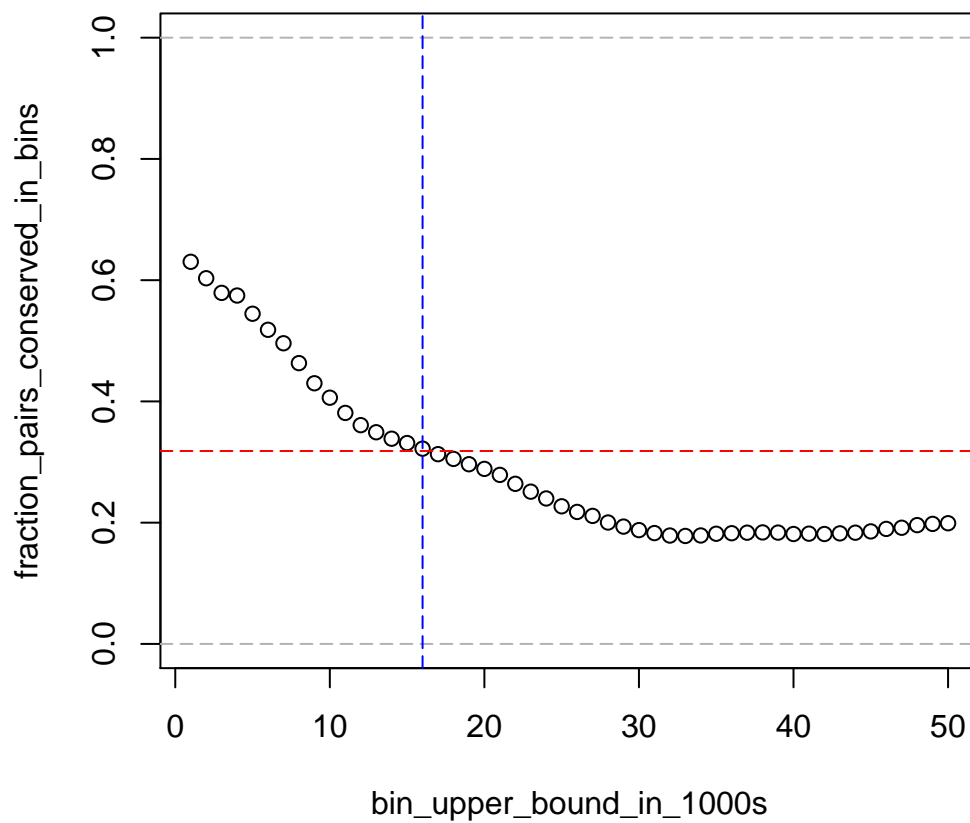

Supplement: s1 [file s1]

**Bin\_conservation\_minus\_bg\_CviKI\_vs\_NTS-1**  
**PD-0.688536**

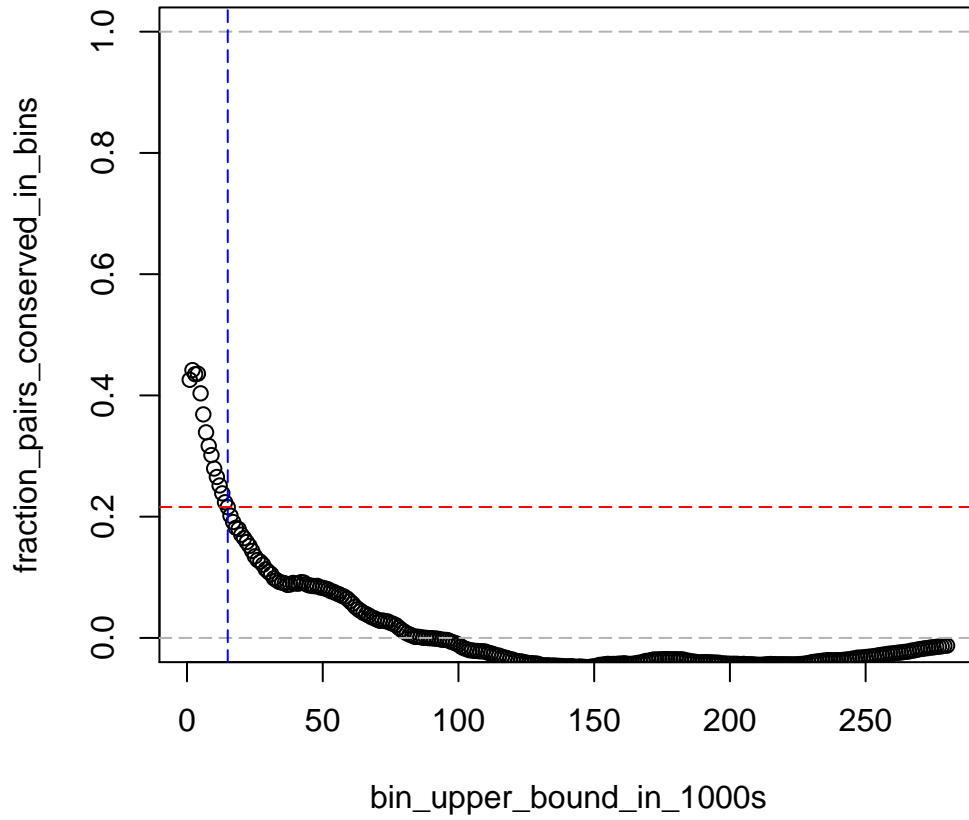

**Bin\_conservation\_minus\_bg\_CviKI\_vs\_NTS-1**  
**PD-0.688536**

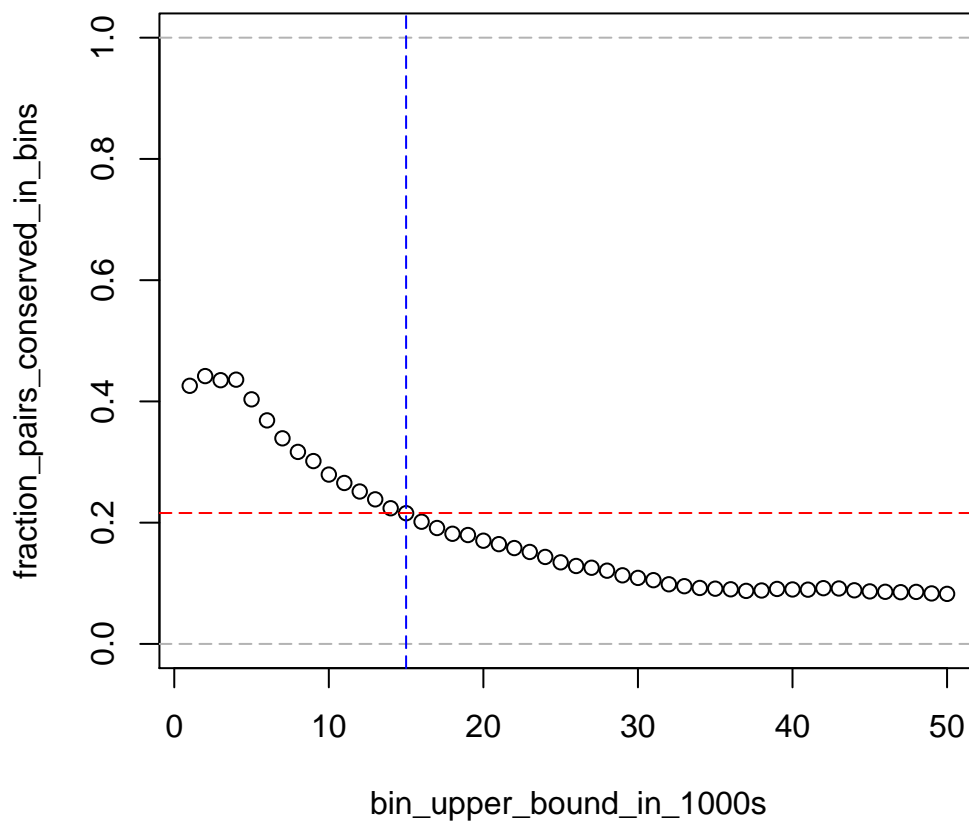

Supplement: s1 [file s1]

**Bin\_conservation\_minus\_bg\_CVG-1\_vs\_FR483**  
**PD-0.019241**

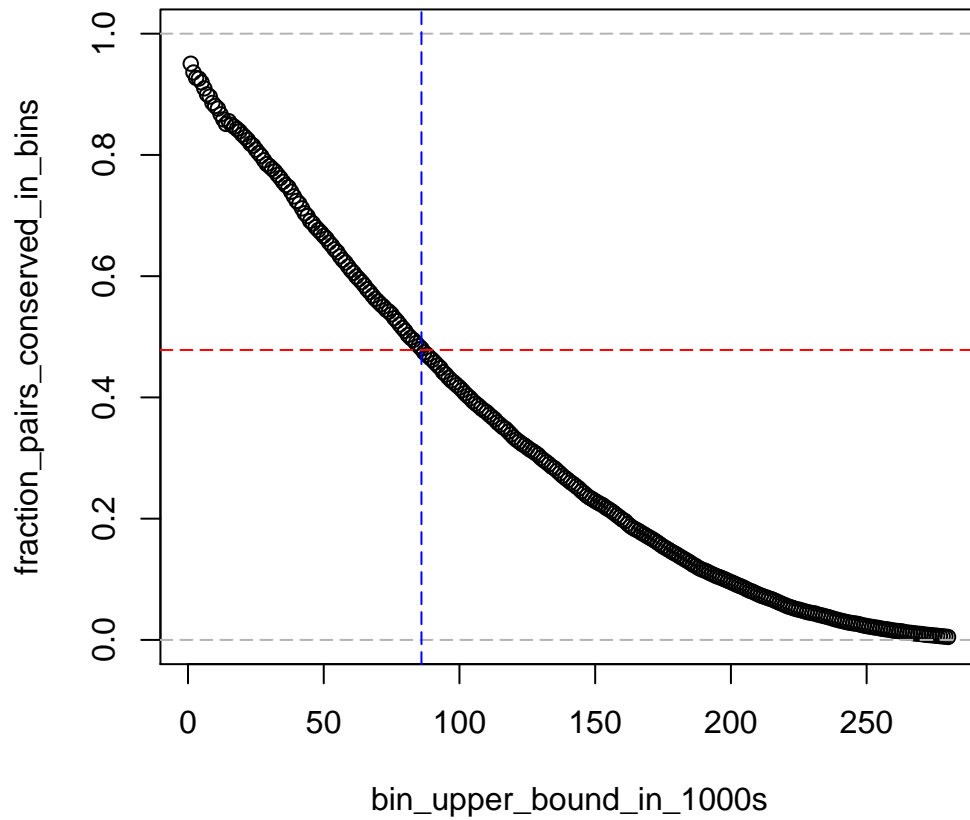

**Bin\_conservation\_minus\_bg\_CVG-1\_vs\_FR483**  
**PD-0.019241**

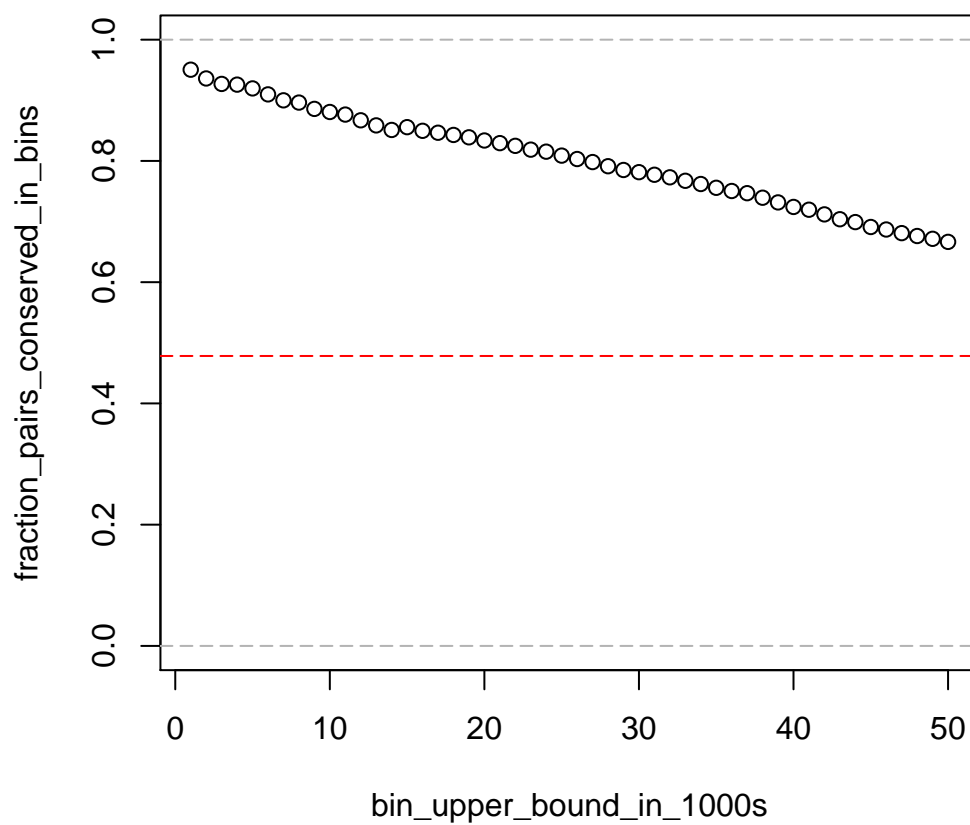

Supplement: s1 [file s1]

**Bin\_conservation\_minus\_bg\_AN69C\_vs\_MA-1E**  
**PD-0.017623**

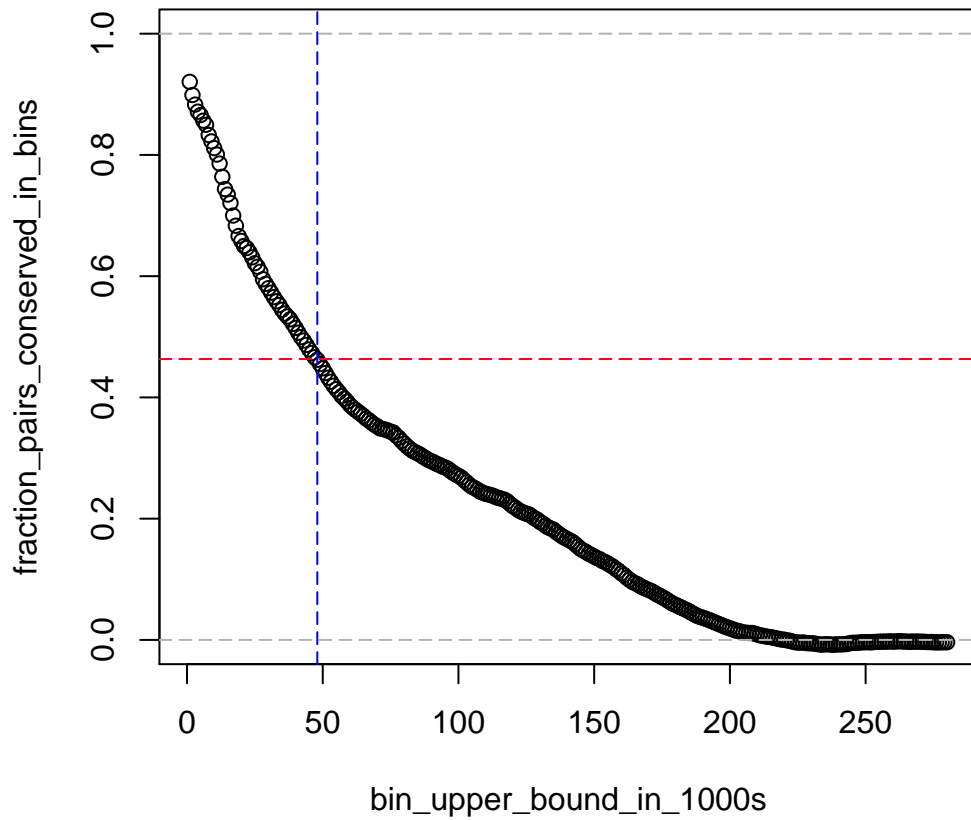

**Bin\_conservation\_minus\_bg\_AN69C\_vs\_MA-1E**  
**PD-0.017623**

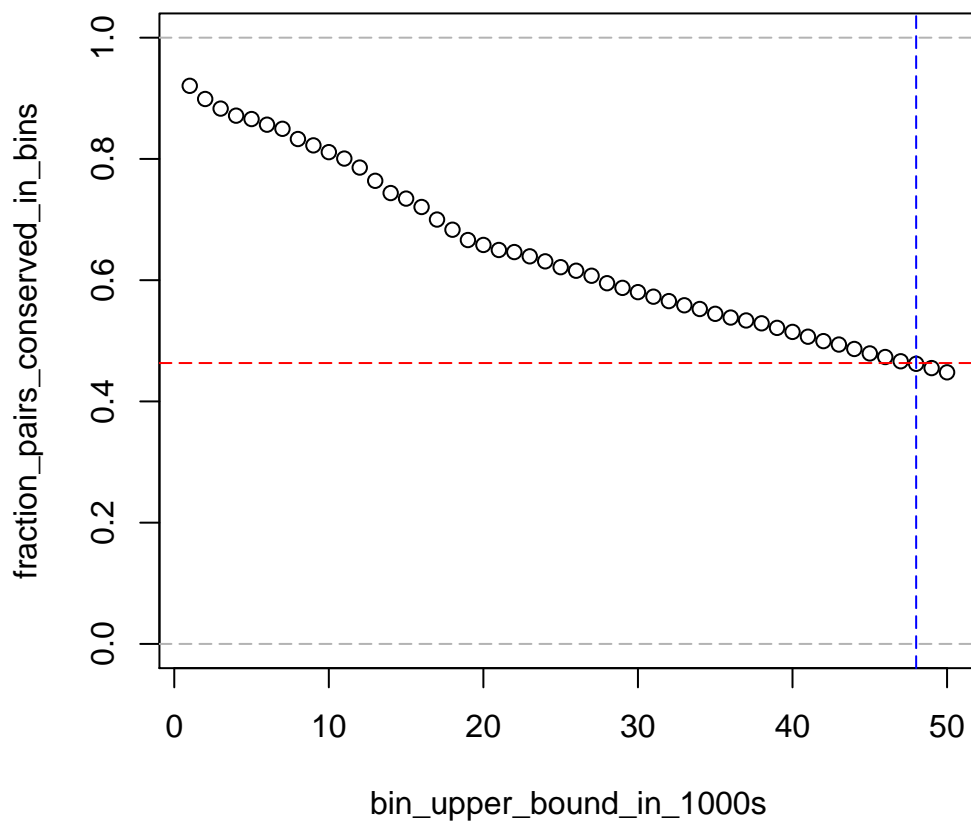

Supplement: s1 [file s1]

**Bin\_conservation\_minus\_bg\_Can18-4\_vs\_NY-2B**  
**PD-0.673034**

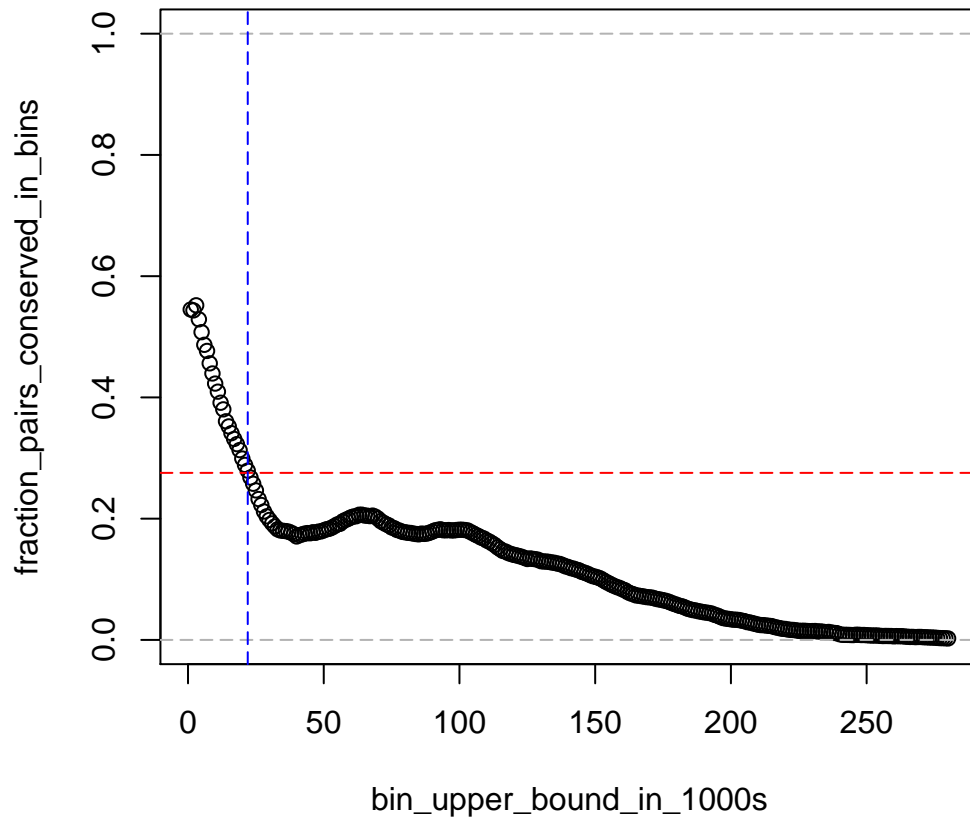

**Bin\_conservation\_minus\_bg\_Can18-4\_vs\_NY-2B**  
**PD-0.673034**

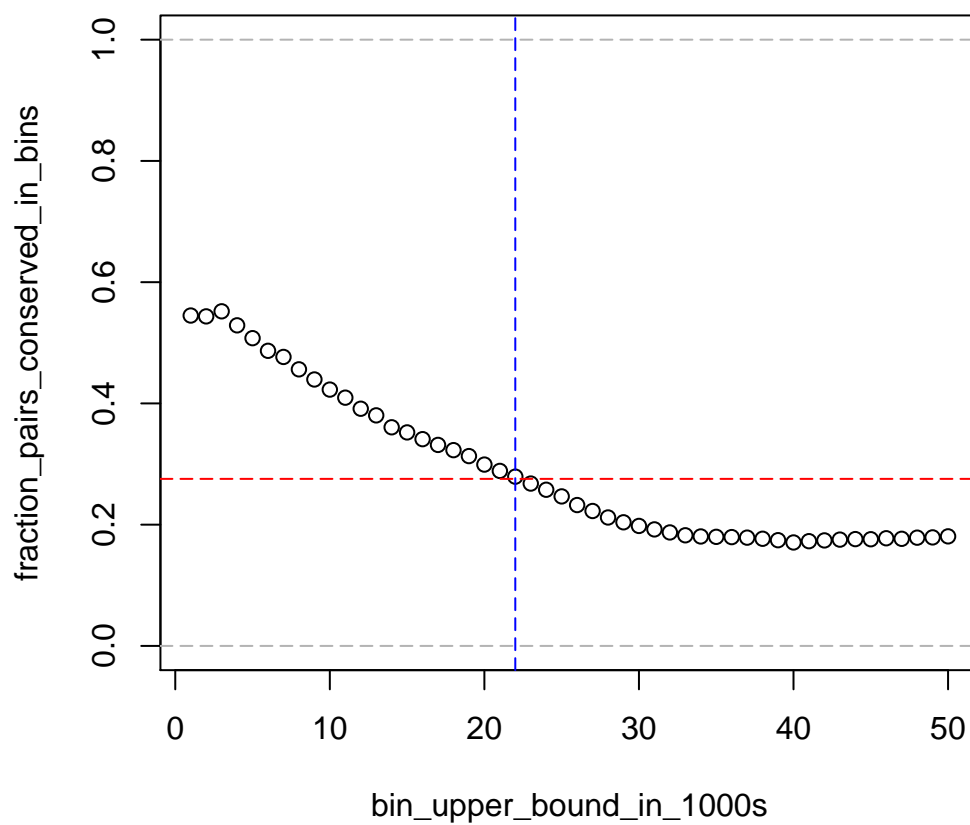

Supplement: s1 [file s1]

**Bin\_conservation\_minus\_bg\_Br0604L\_vs\_NE-JV-2**  
**PD-0.061319**

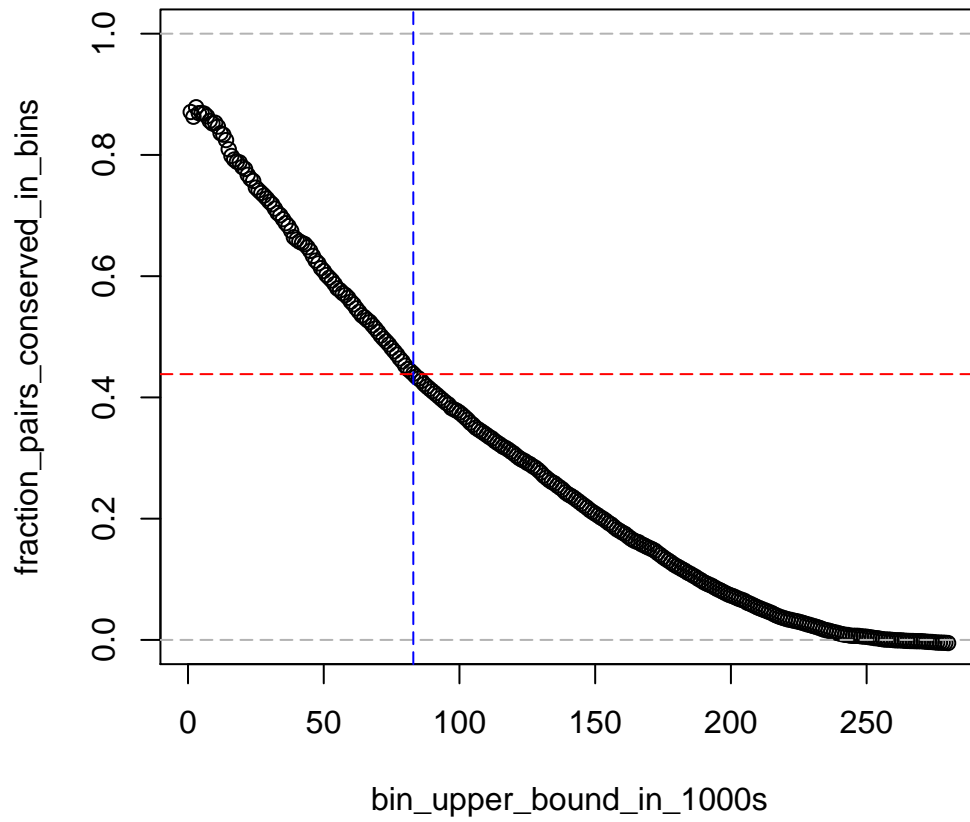

**Bin\_conservation\_minus\_bg\_Br0604L\_vs\_NE-JV-2**  
**PD-0.061319**

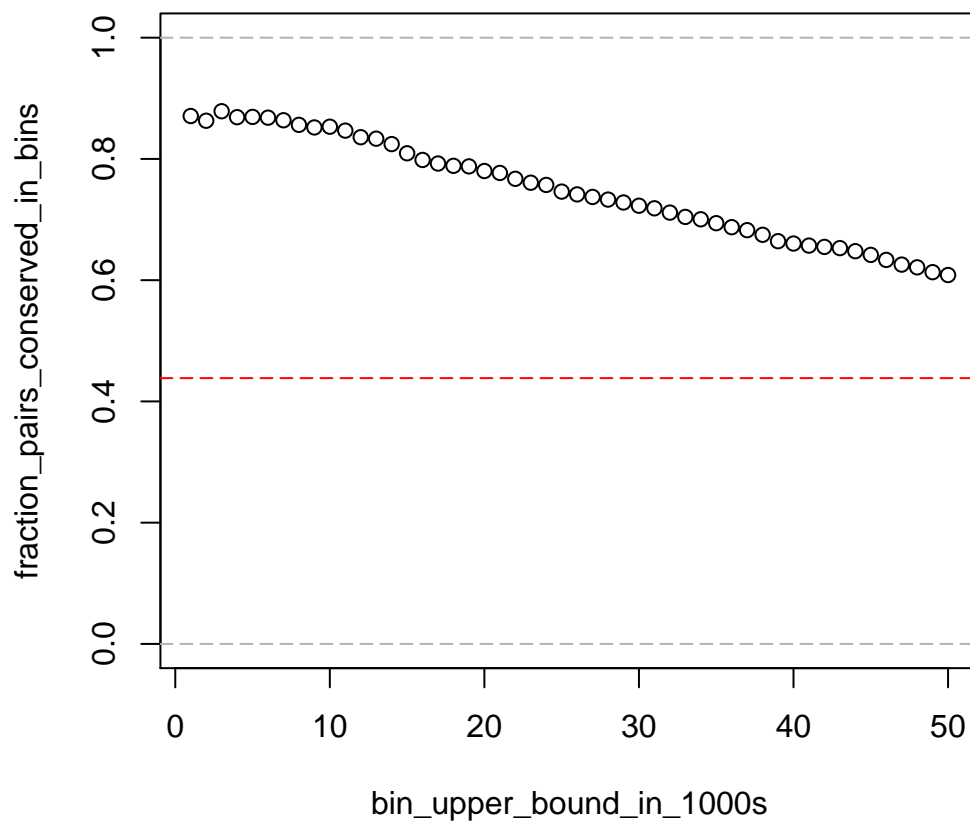

Supplement: s1 [file s1]

**Bin\_conservation\_minus\_bg\_FR483\_vs\_IL-3A**  
**PD-0.644177**

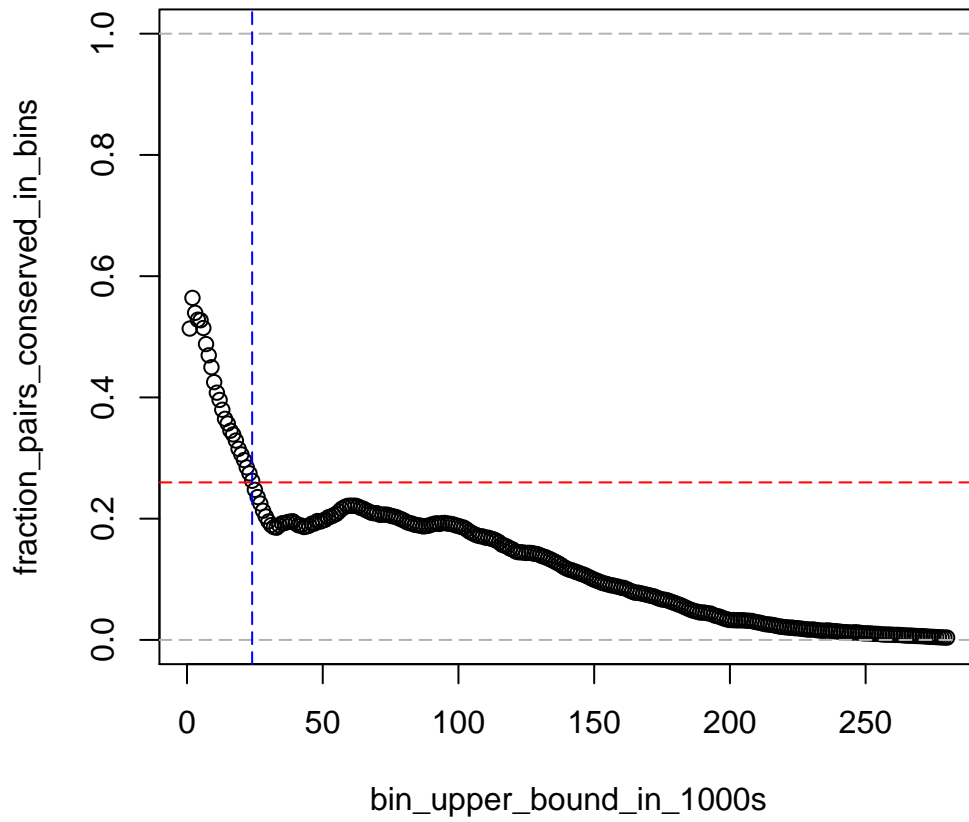

**Bin\_conservation\_minus\_bg\_FR483\_vs\_IL-3A**  
**PD-0.644177**

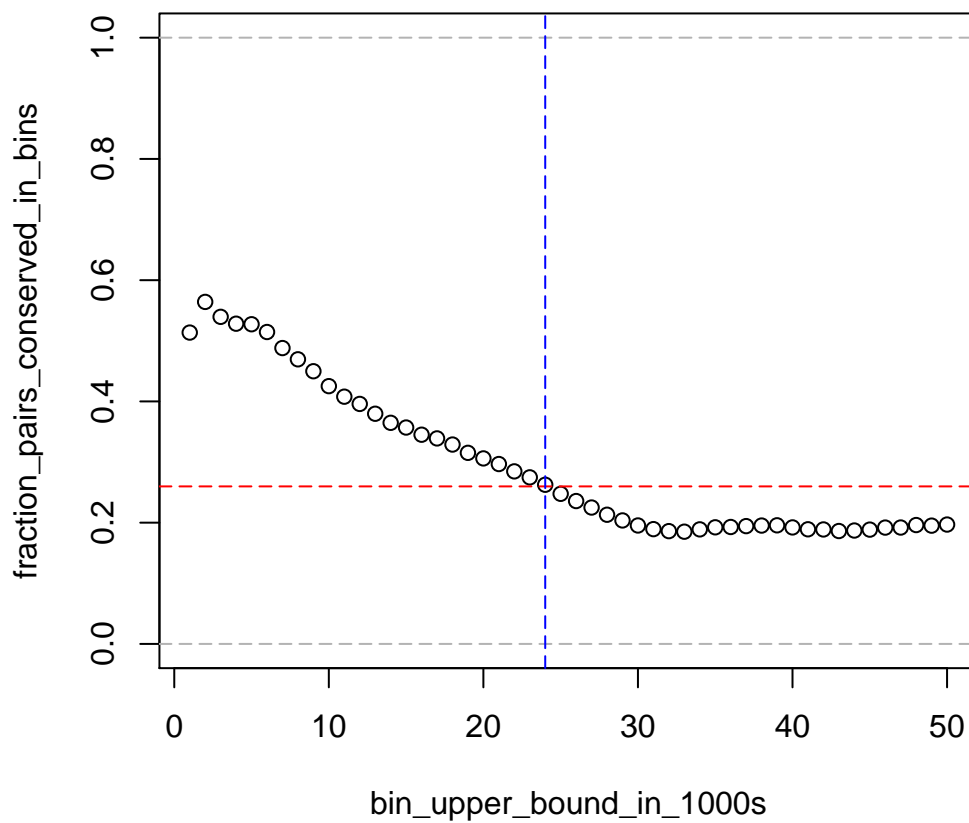

Supplement: s1 [file s1]

**Bin\_conservation\_minus\_bg\_MA-1E\_vs\_NE-JV-4**  
**PD-0.014686**

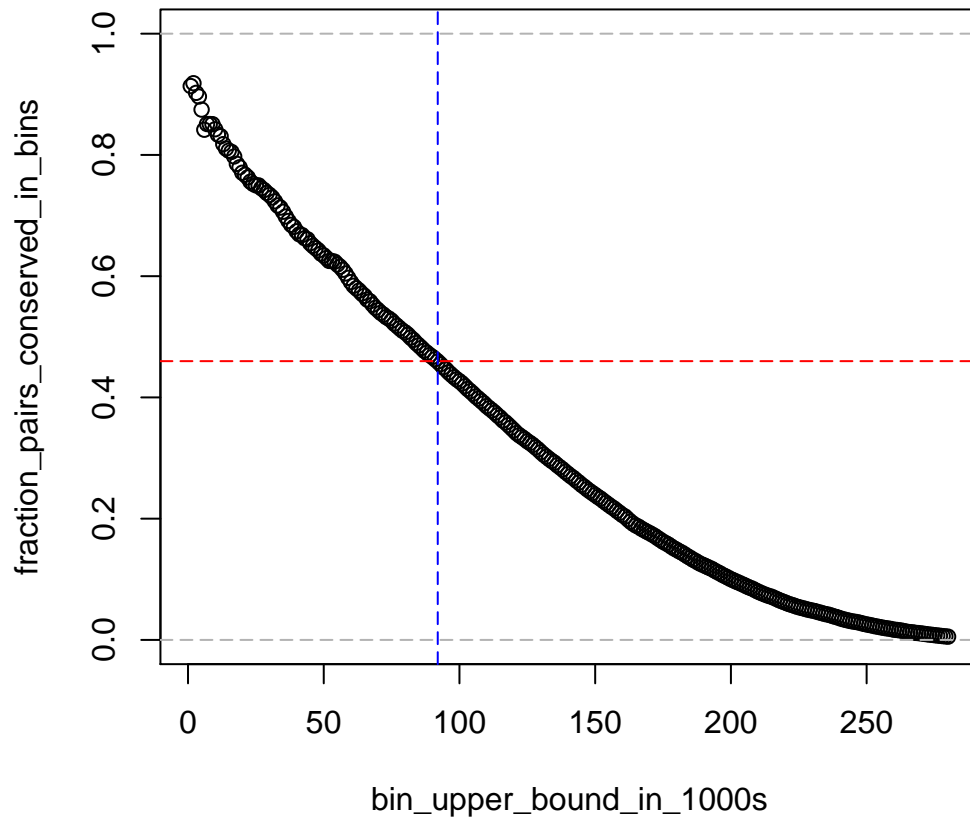

**Bin\_conservation\_minus\_bg\_MA-1E\_vs\_NE-JV-4**  
**PD-0.014686**

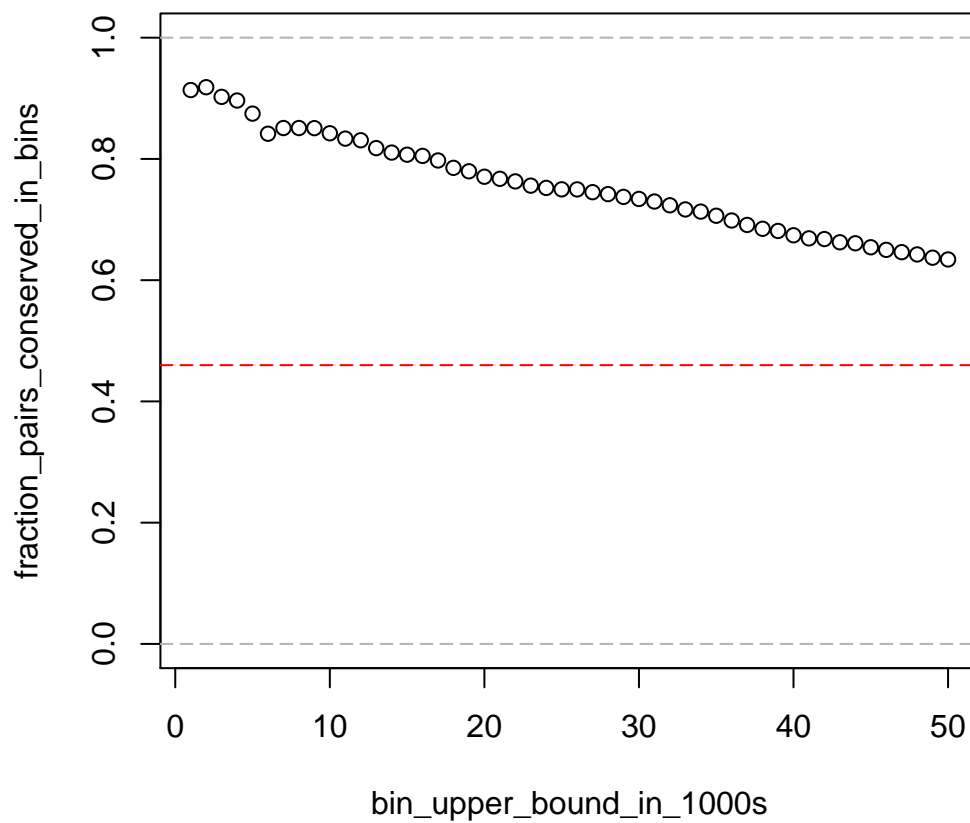

Supplement: s1 [file s1]

**Bin\_conservation\_minus\_bg\_Canal-1\_vs\_GM0701.1**  
**PD-0.103559**

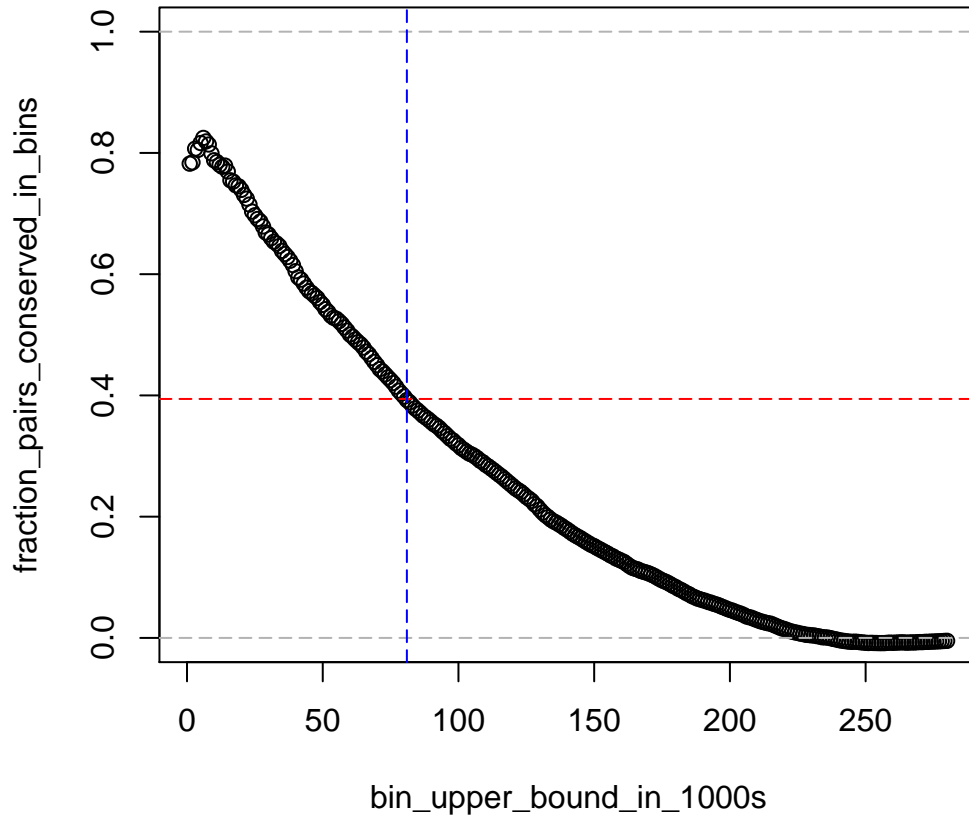

**Bin\_conservation\_minus\_bg\_Canal-1\_vs\_GM0701.1**  
**PD-0.103559**

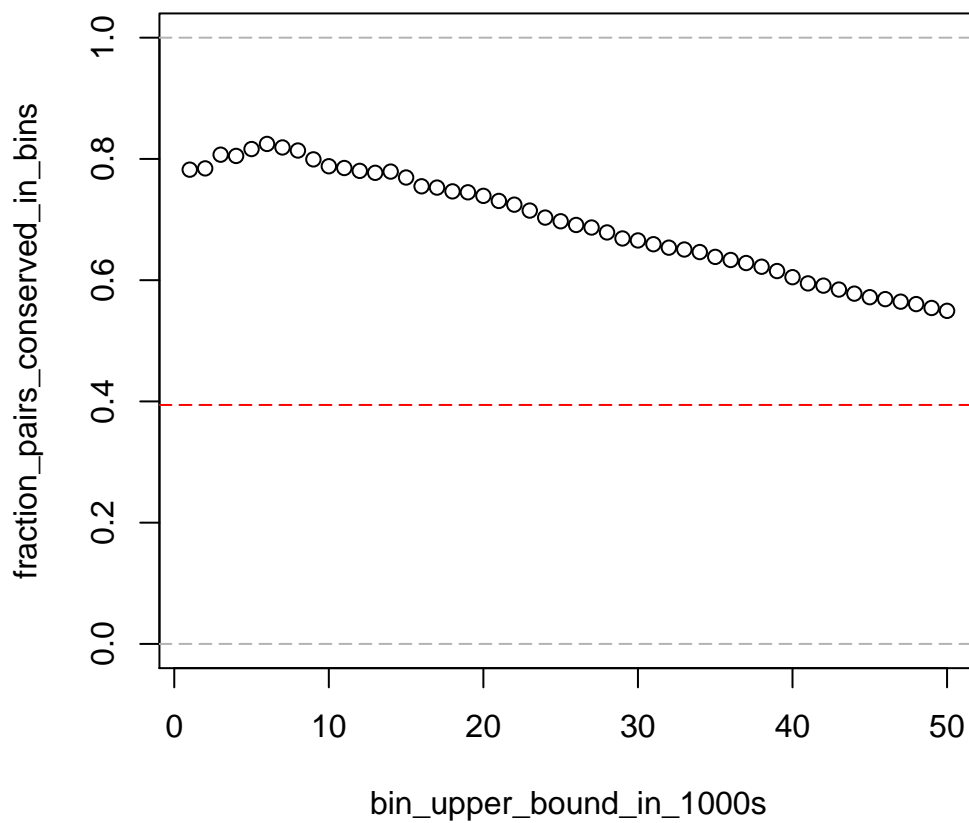

Supplement: s1 [file s1]

**Bin\_conservation\_minus\_bg\_IL-3A\_vs\_KS1B**  
**PD-0.013436**

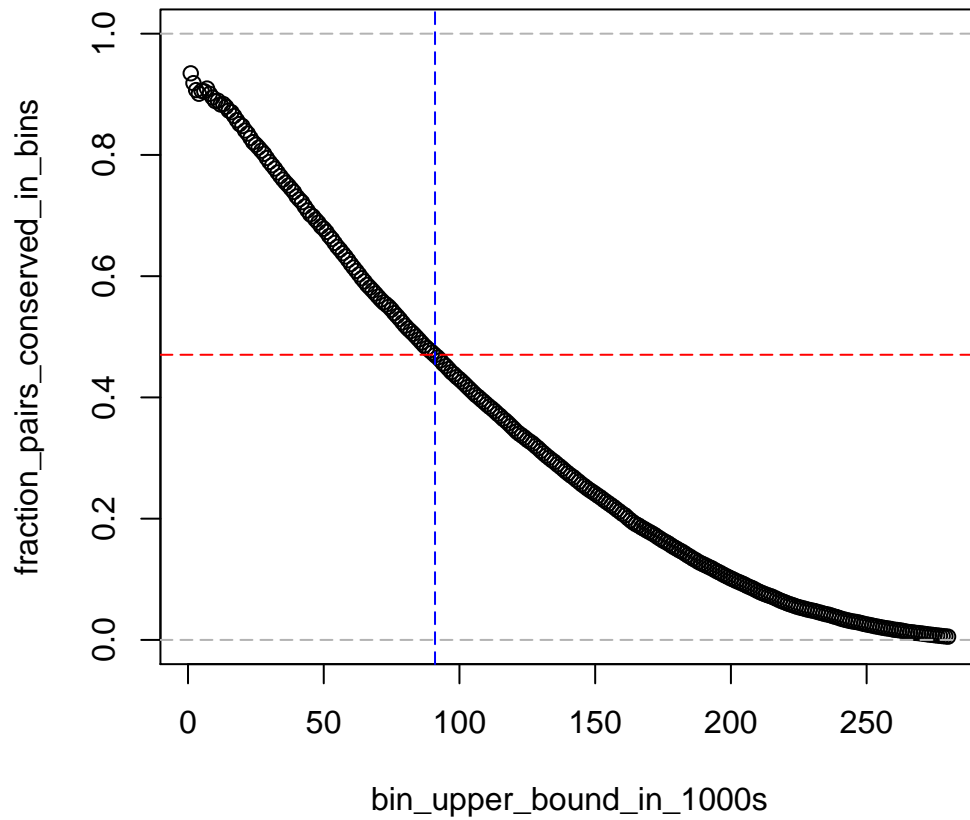

**Bin\_conservation\_minus\_bg\_IL-3A\_vs\_KS1B**  
**PD-0.013436**

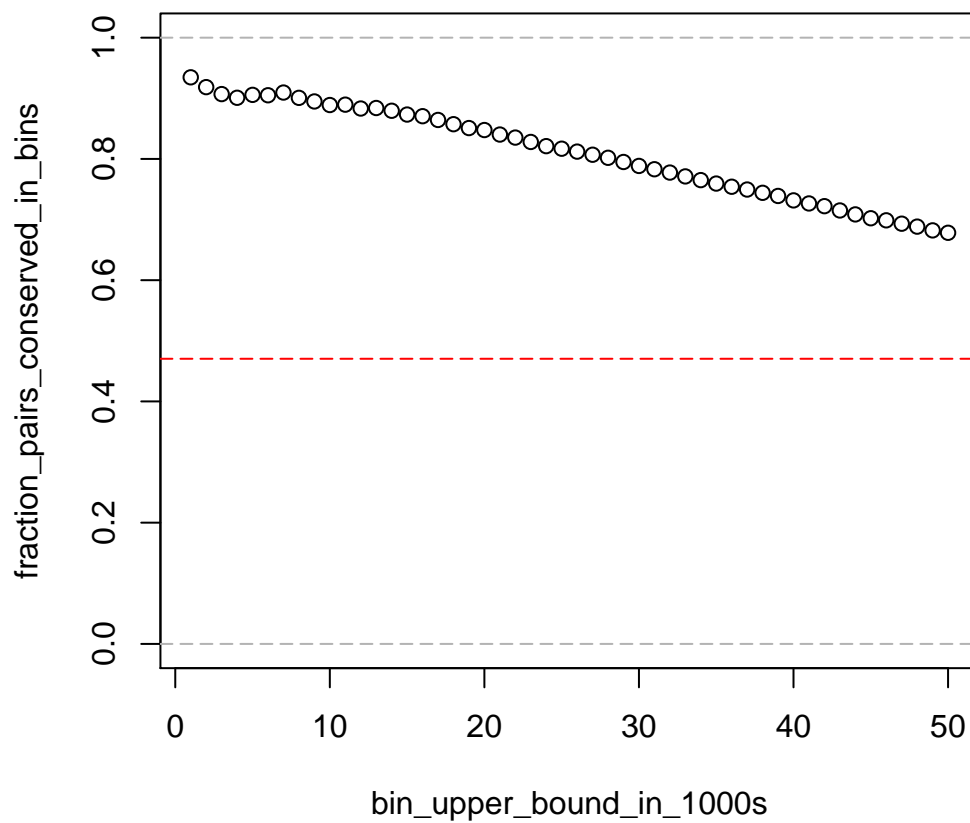

Supplement: s1 [file s1]

**Bin\_conservation\_minus\_bg\_CVA-1\_vs\_MO0605SPH**  
**PD-0.461122**

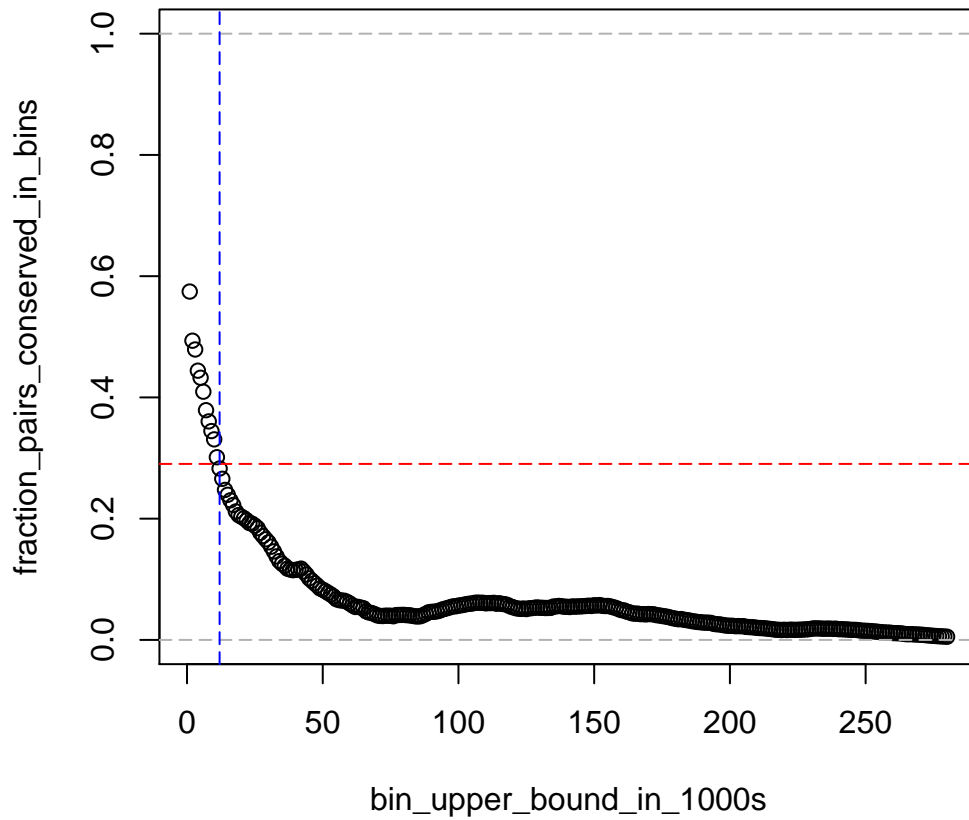

**Bin\_conservation\_minus\_bg\_CVA-1\_vs\_MO0605SPH**  
**PD-0.461122**

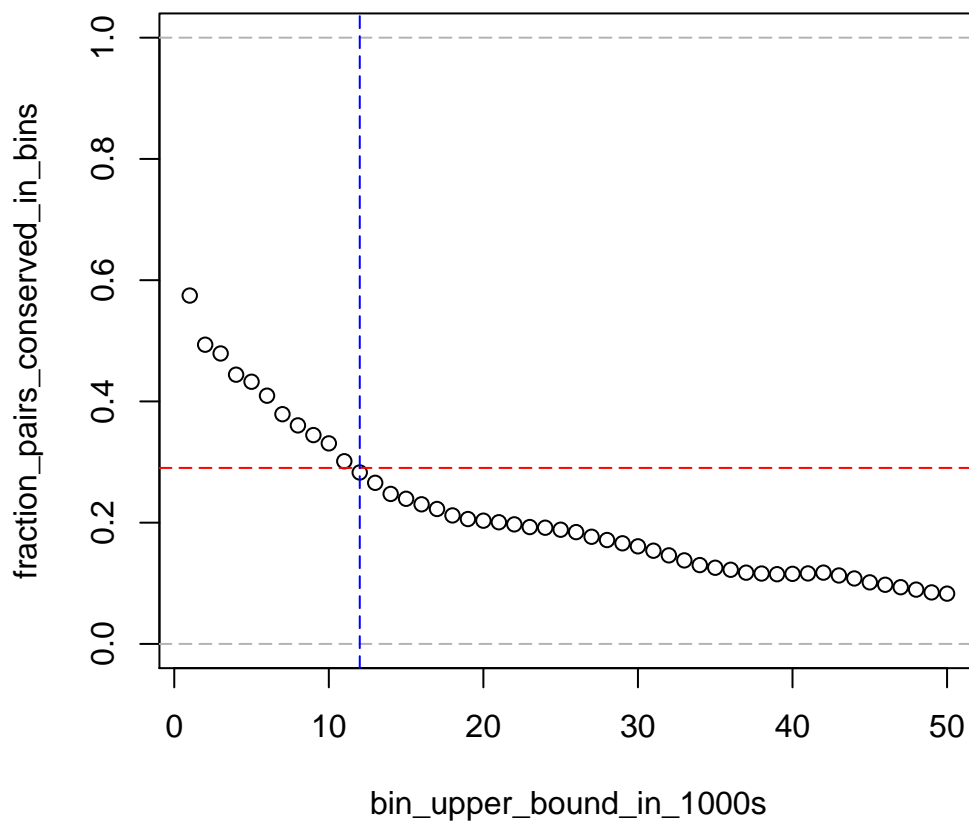

Supplement: s1 [file s1]

**Bin\_conservation\_minus\_bg\_Can18-4\_vs\_CVA-1**  
**PD-0.031296**

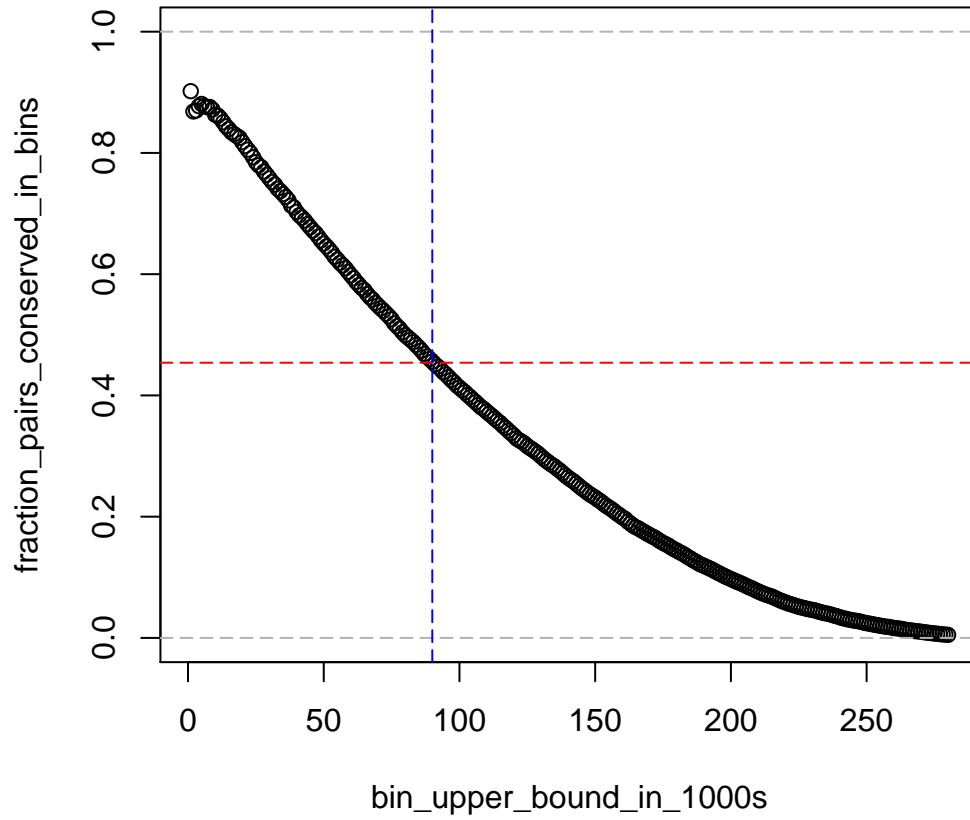

**Bin\_conservation\_minus\_bg\_Can18-4\_vs\_CVA-1**  
**PD-0.031296**

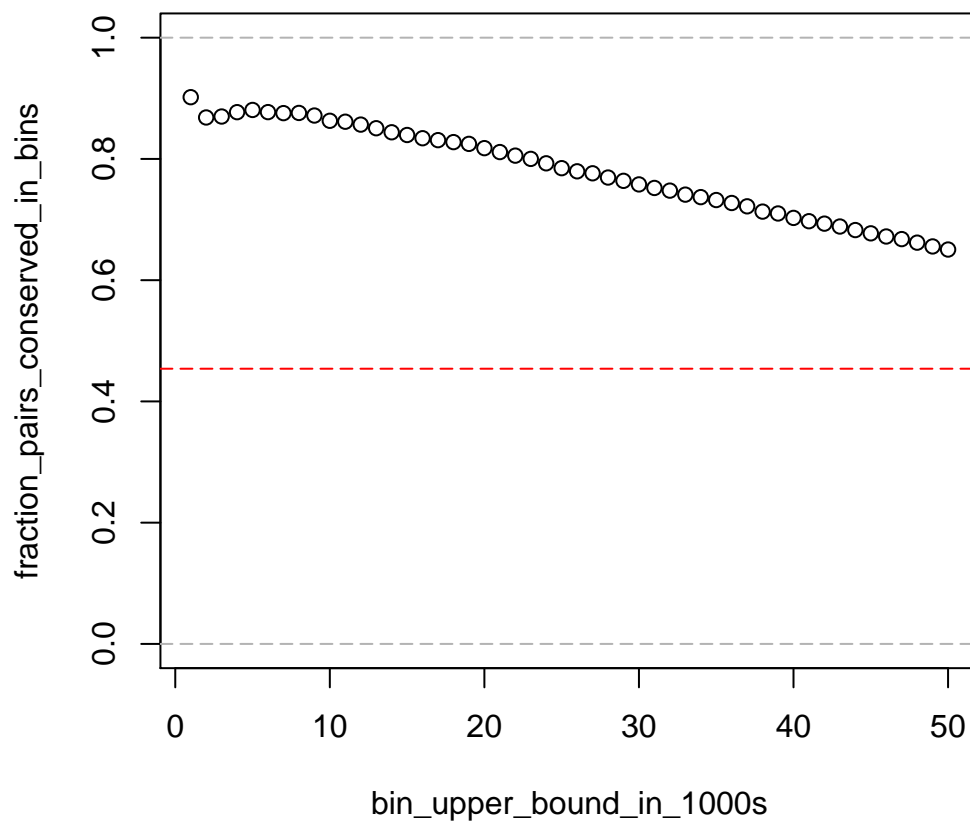

Supplement: s1 [file s1]

**Bin\_conservation\_minus\_bg\_Can0610SP\_vs\_NE-JV-2**  
**PD-0.014675**

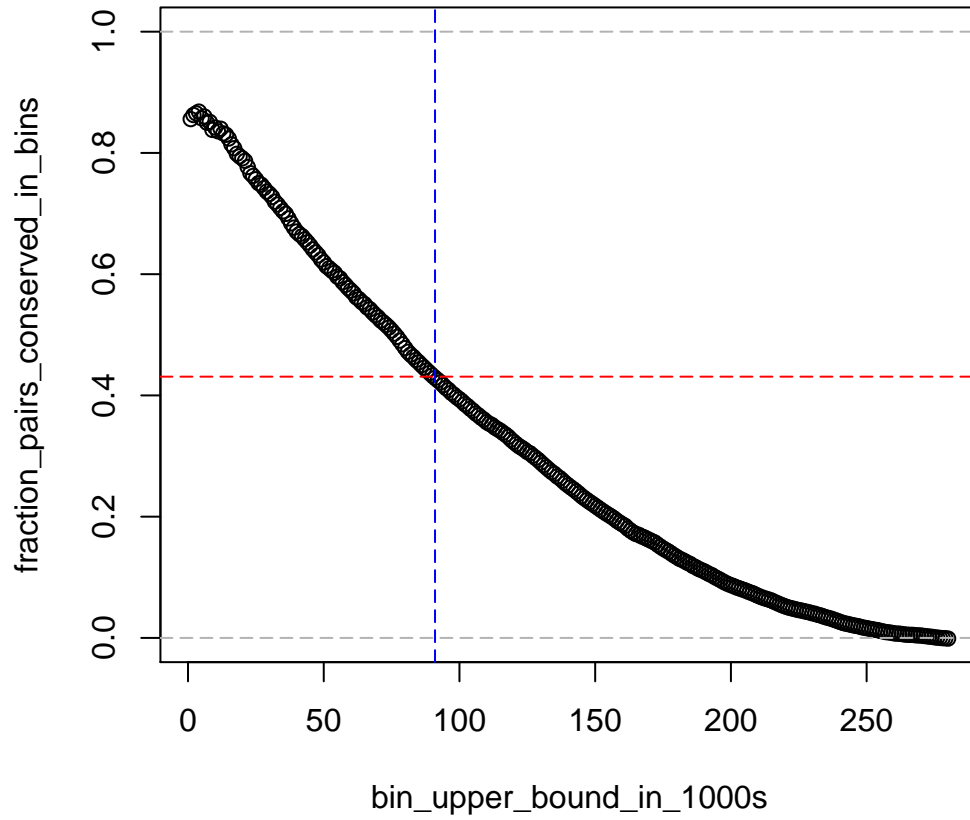

**Bin\_conservation\_minus\_bg\_Can0610SP\_vs\_NE-JV-2**  
**PD-0.014675**

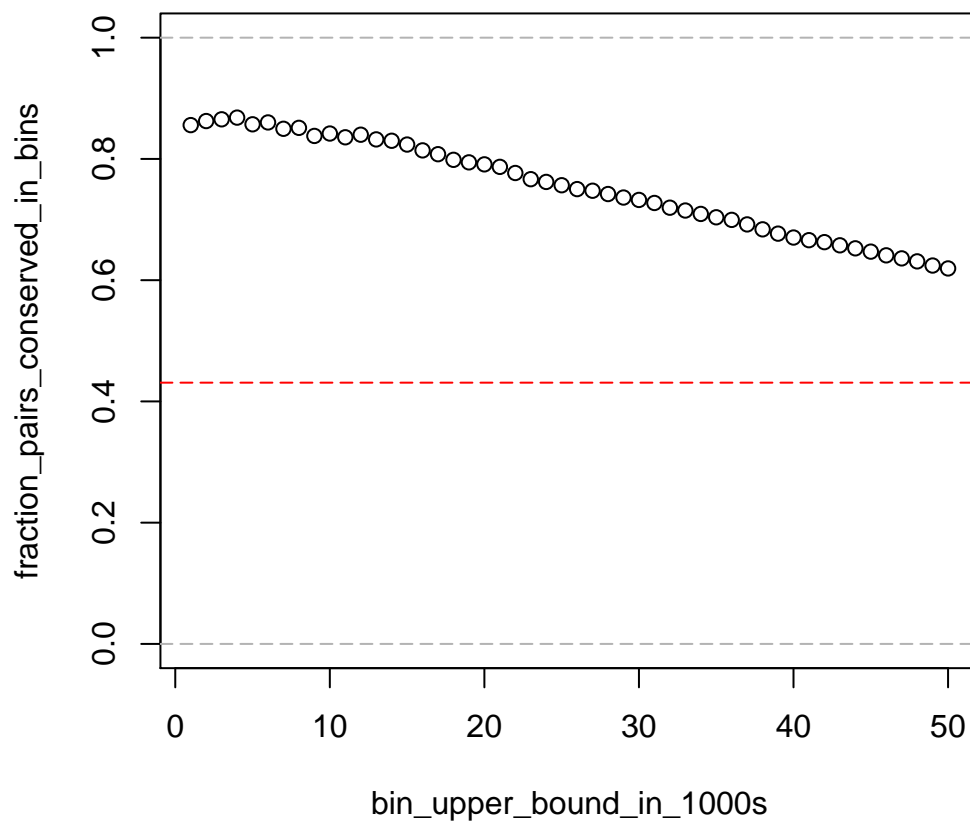

Supplement: s1 [file s1]

**Bin\_conservation\_minus\_bg\_IL-3A\_vs\_NW665.2**  
**PD-0.64232**

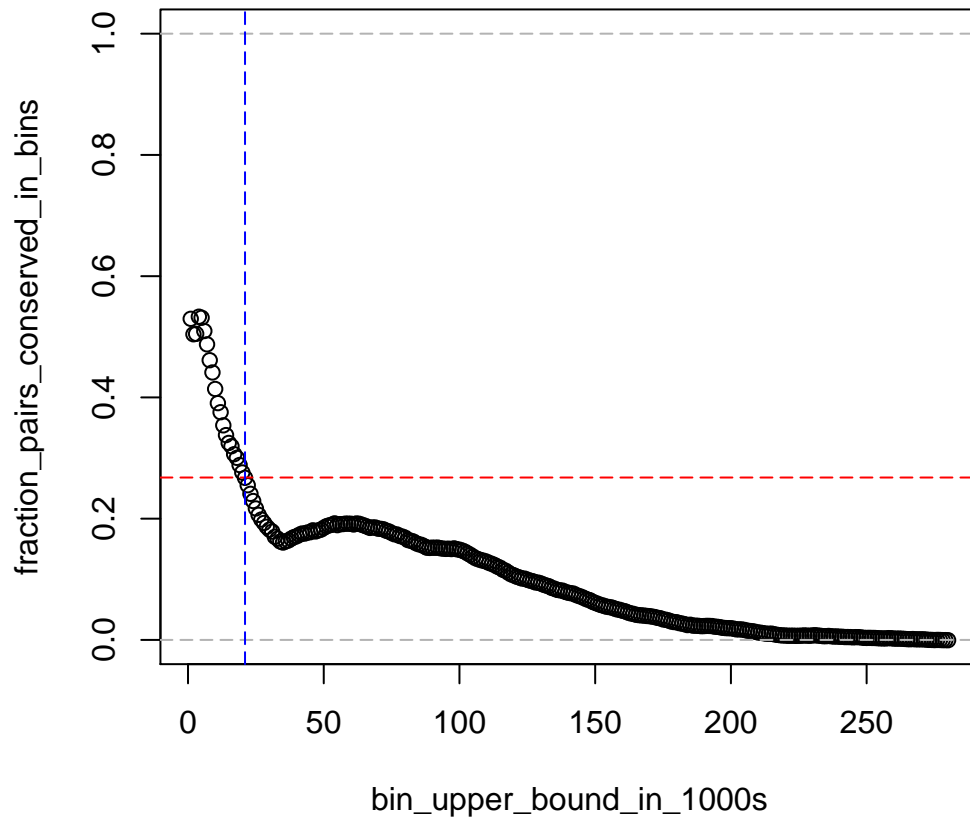

**Bin\_conservation\_minus\_bg\_IL-3A\_vs\_NW665.2**  
**PD-0.64232**

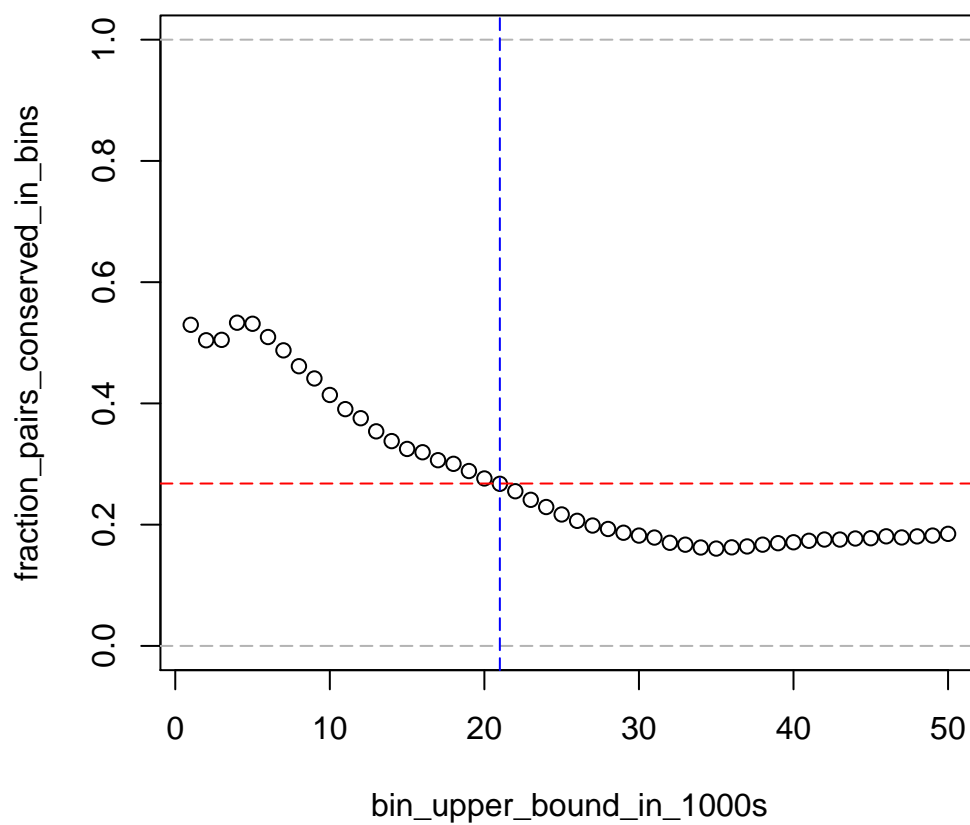

Supplement: s1 [file s1]

**Bin\_conservation\_minus\_bg\_Can18-4\_vs\_FR483**  
**PD-0.038772**

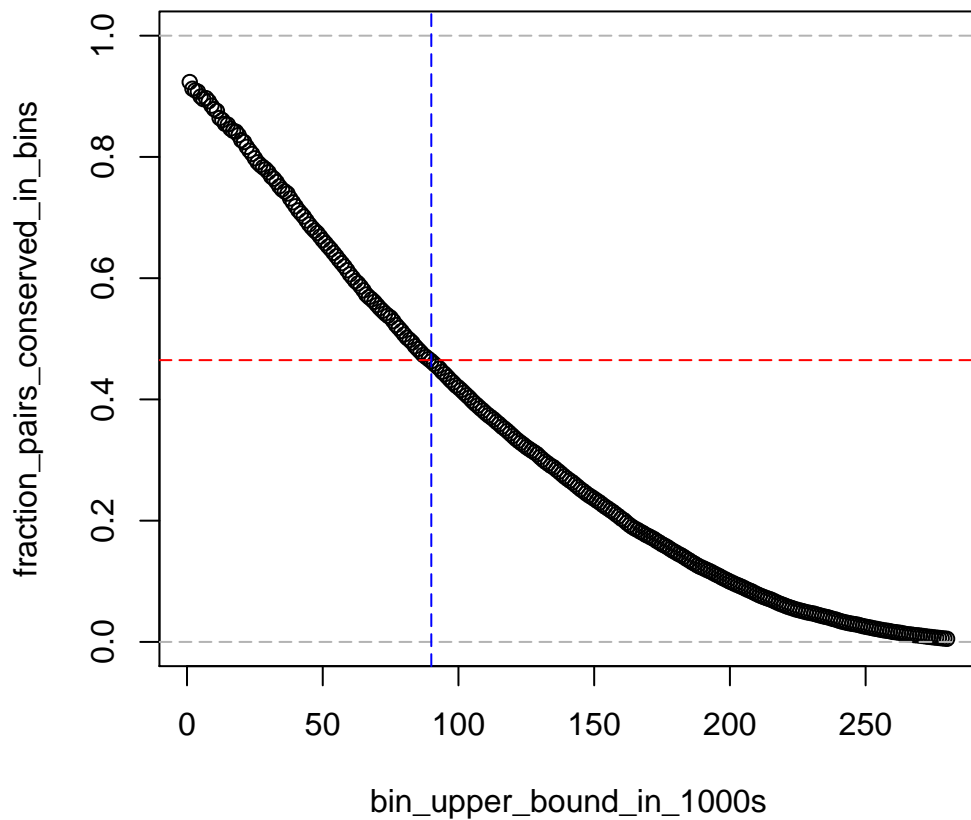

**Bin\_conservation\_minus\_bg\_Can18-4\_vs\_FR483**  
**PD-0.038772**

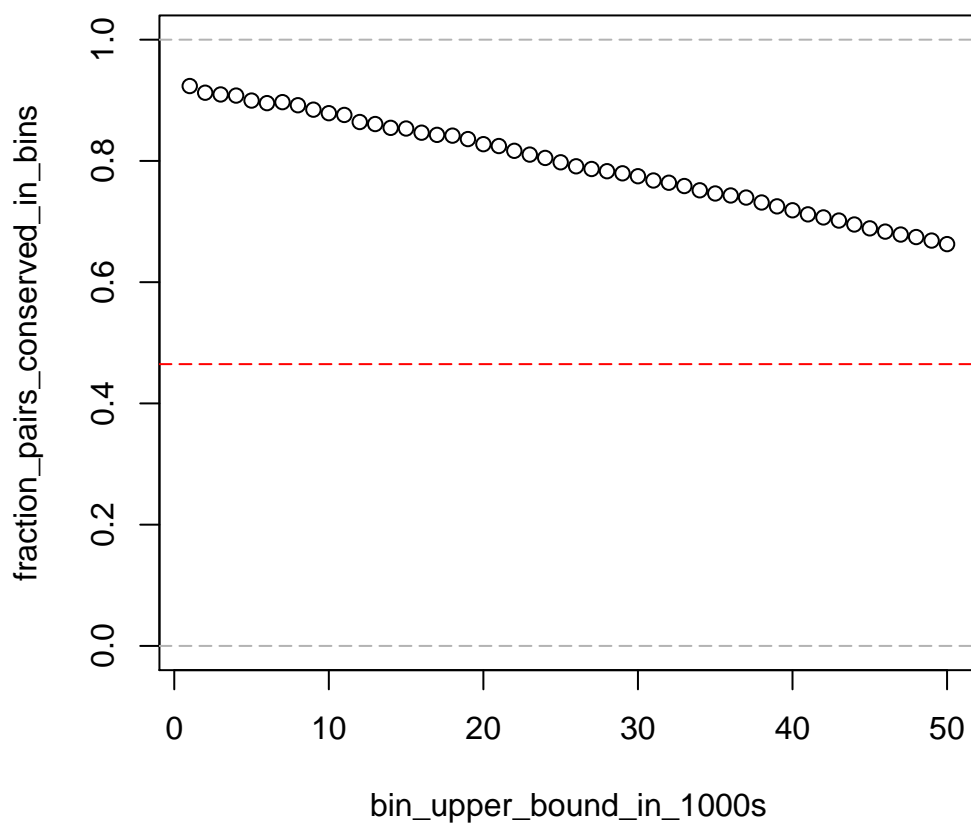

Supplement: s1 [file s1]

**Bin\_conservation\_minus\_bg\_CVG-1\_vs\_MO0605SPH**  
**PD-0.465353**

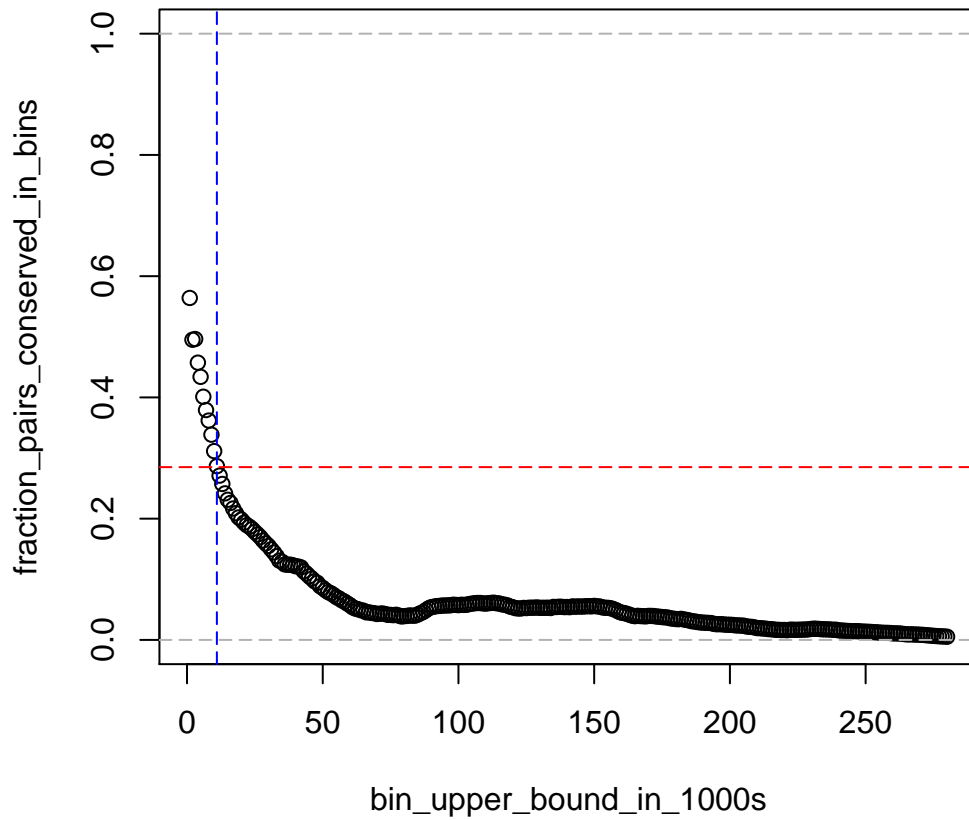

**Bin\_conservation\_minus\_bg\_CVG-1\_vs\_MO0605SPH**  
**PD-0.465353**

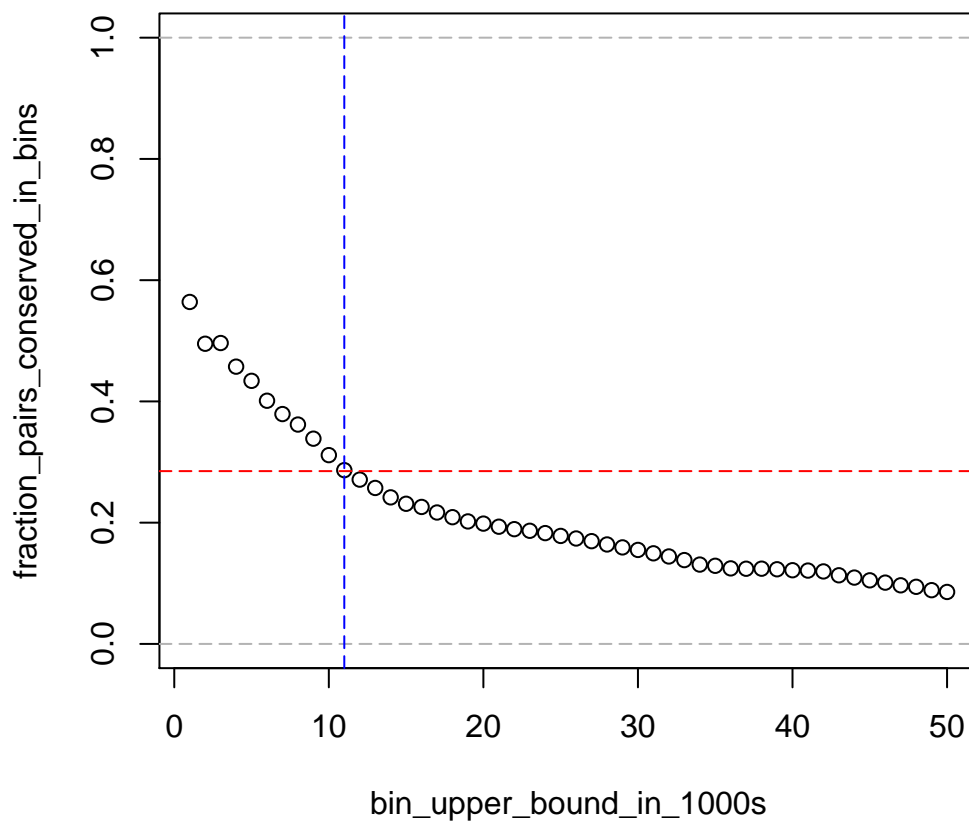

Supplement: s1 [file s1]

**Bin\_conservation\_minus\_bg\_KS1B\_vs\_NE-JV-2**  
**PD-0.693327**

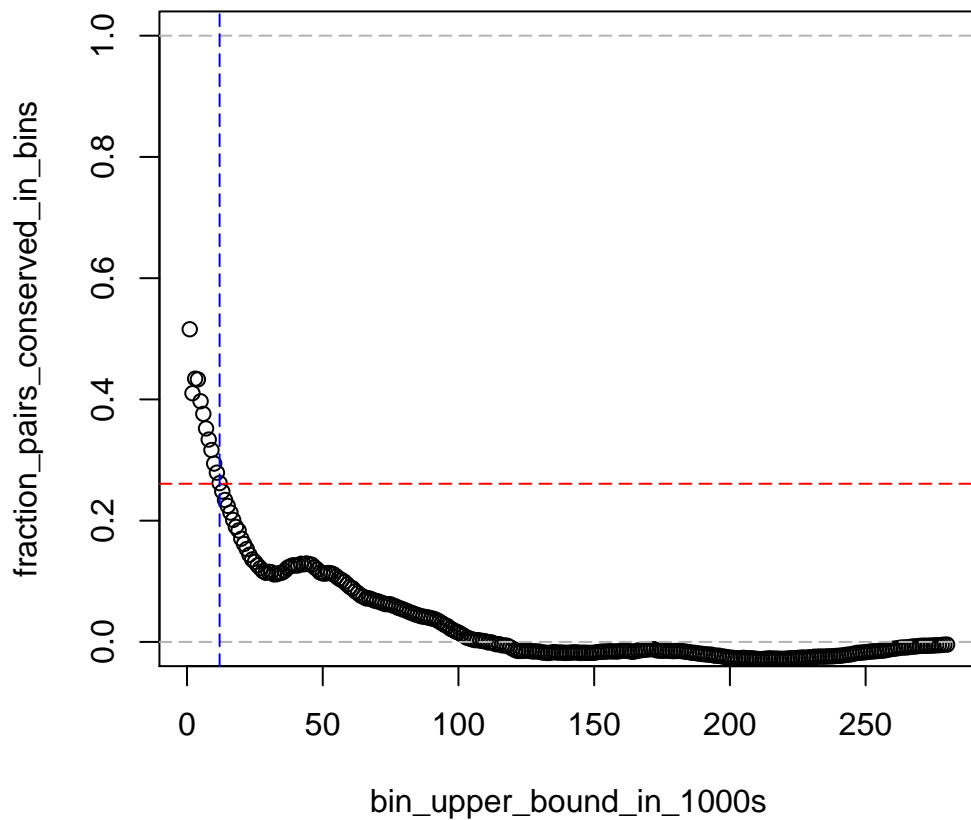

**Bin\_conservation\_minus\_bg\_KS1B\_vs\_NE-JV-2**  
**PD-0.693327**

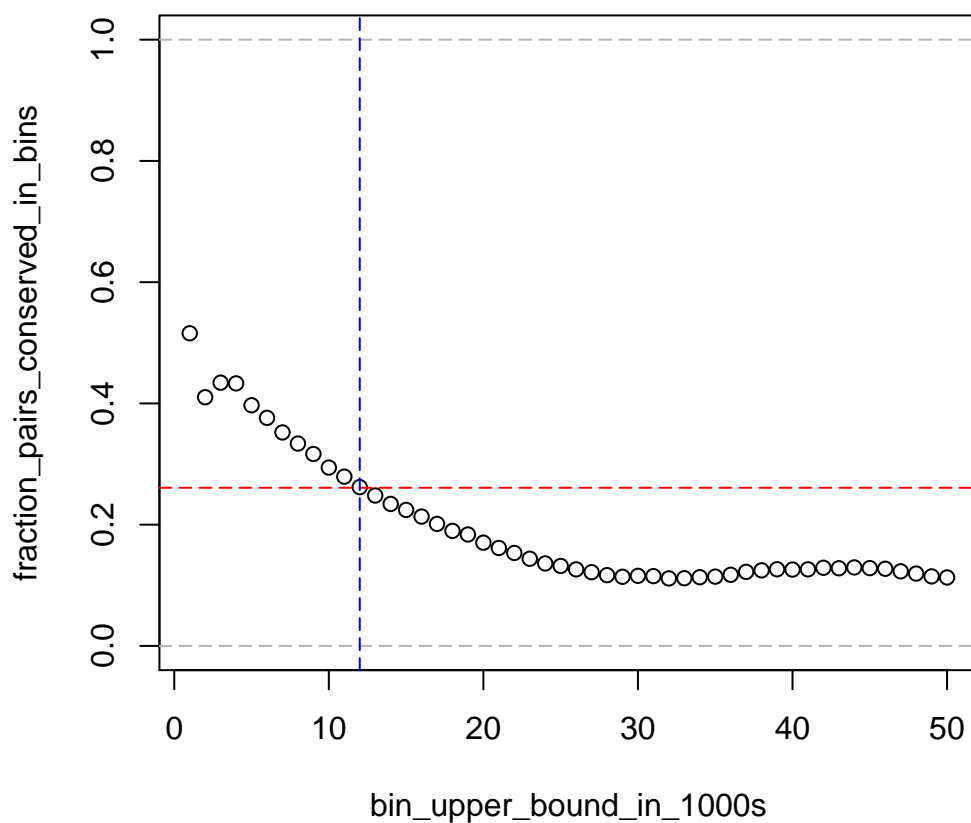

Supplement: s1 [file s1]

**Bin\_conservation\_minus\_bg\_GM0701.1\_vs\_NE-JV-2**  
**PD-0.061762**

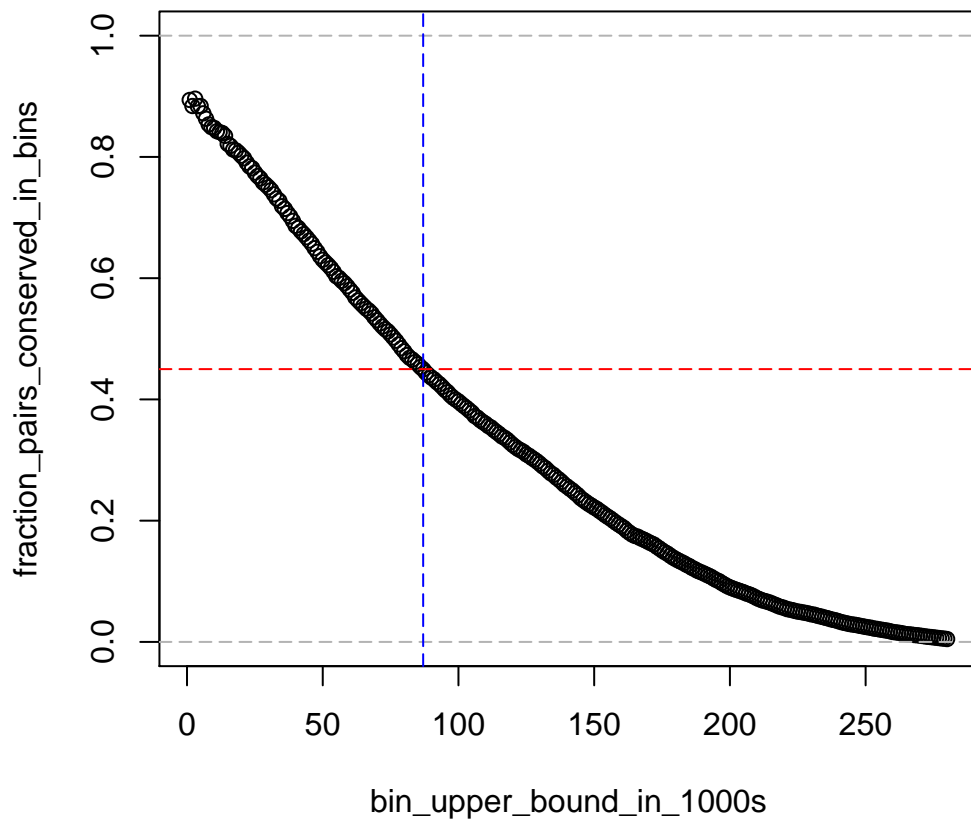

**Bin\_conservation\_minus\_bg\_GM0701.1\_vs\_NE-JV-2**  
**PD-0.061762**

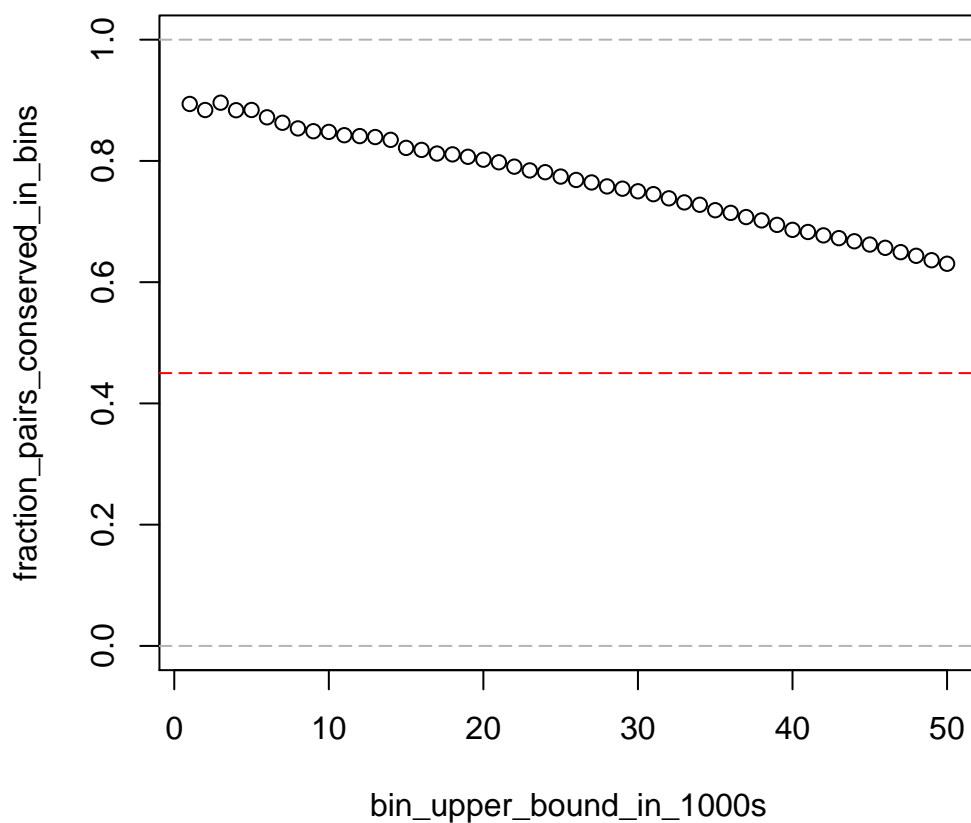

Supplement: s1 [file s1]

**Bin\_conservation\_minus\_bg\_CVB-1\_vs\_KS1B**  
**PD-0.667175**

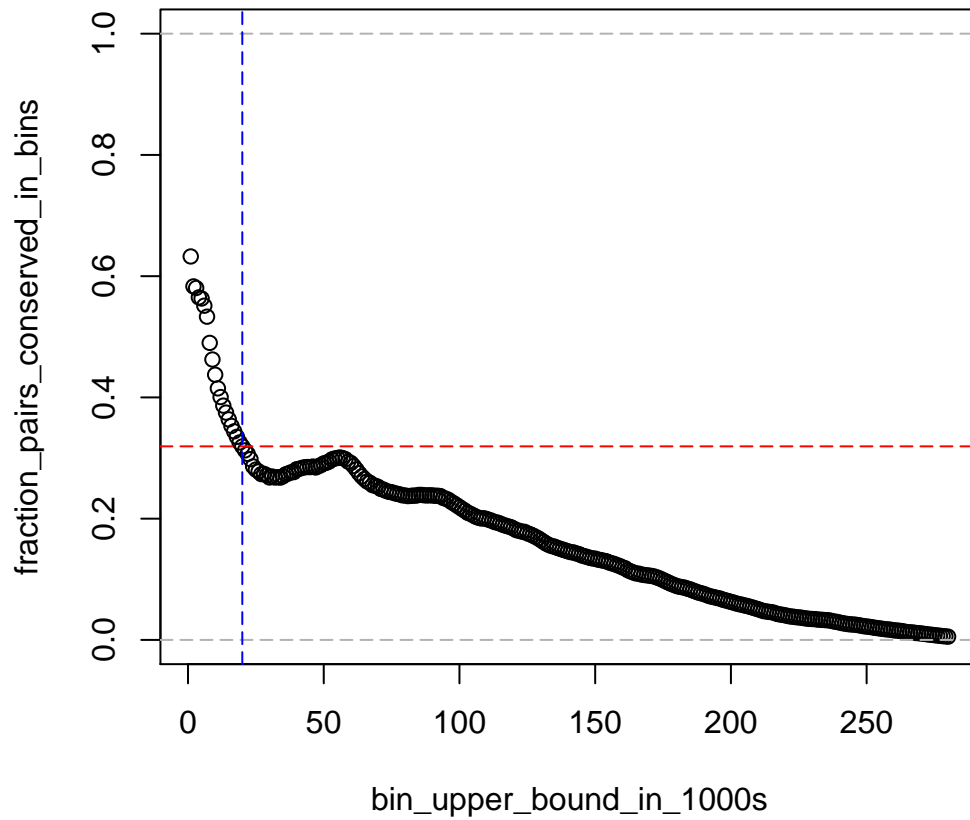

**Bin\_conservation\_minus\_bg\_CVB-1\_vs\_KS1B**  
**PD-0.667175**

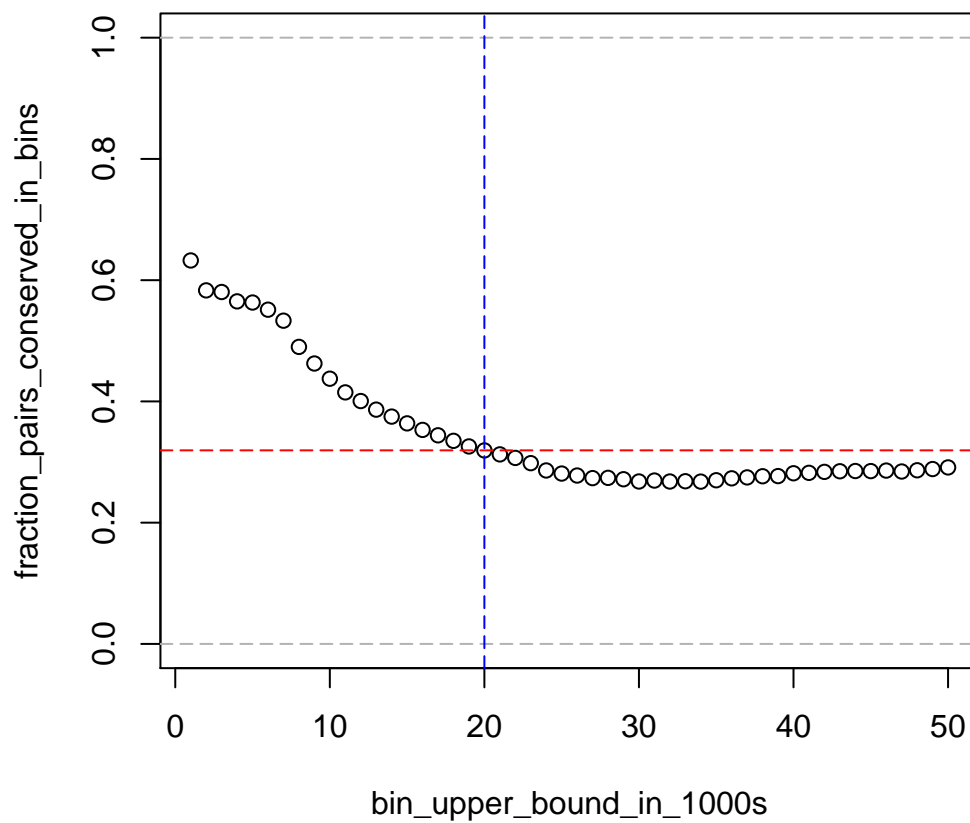

Supplement: s1 [file s1]

**Bin\_conservation\_minus\_bg\_Fr5L\_vs\_IL-5-2s1**  
**PD-0.660492**

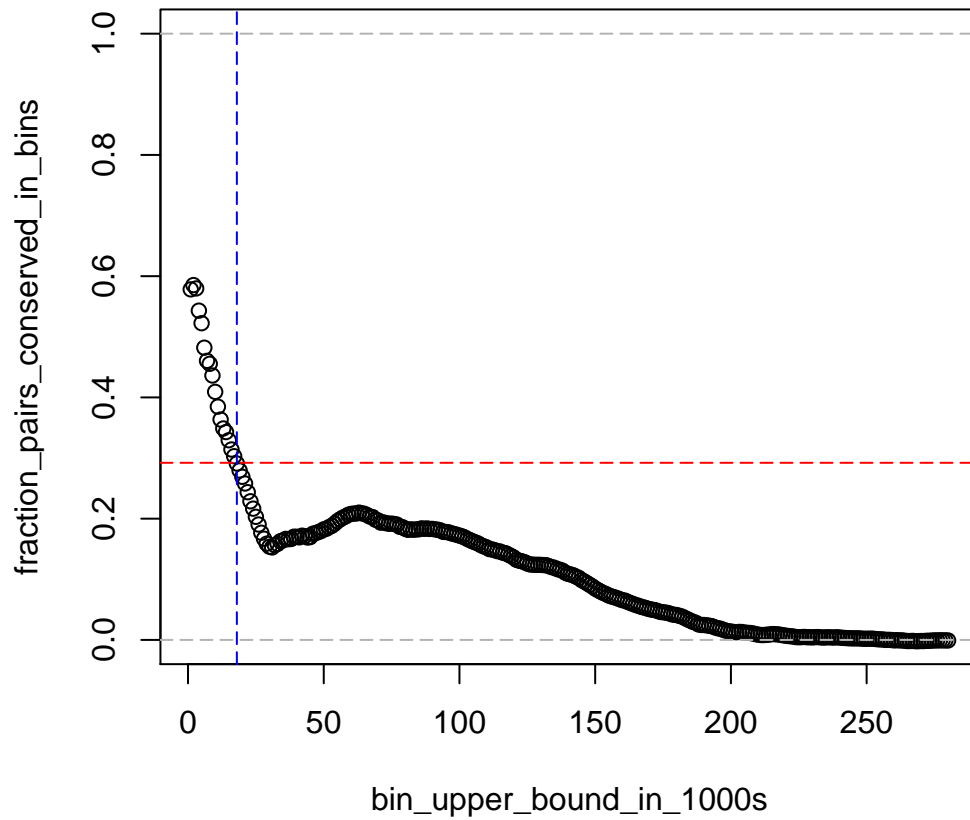

**Bin\_conservation\_minus\_bg\_Fr5L\_vs\_IL-5-2s1**  
**PD-0.660492**

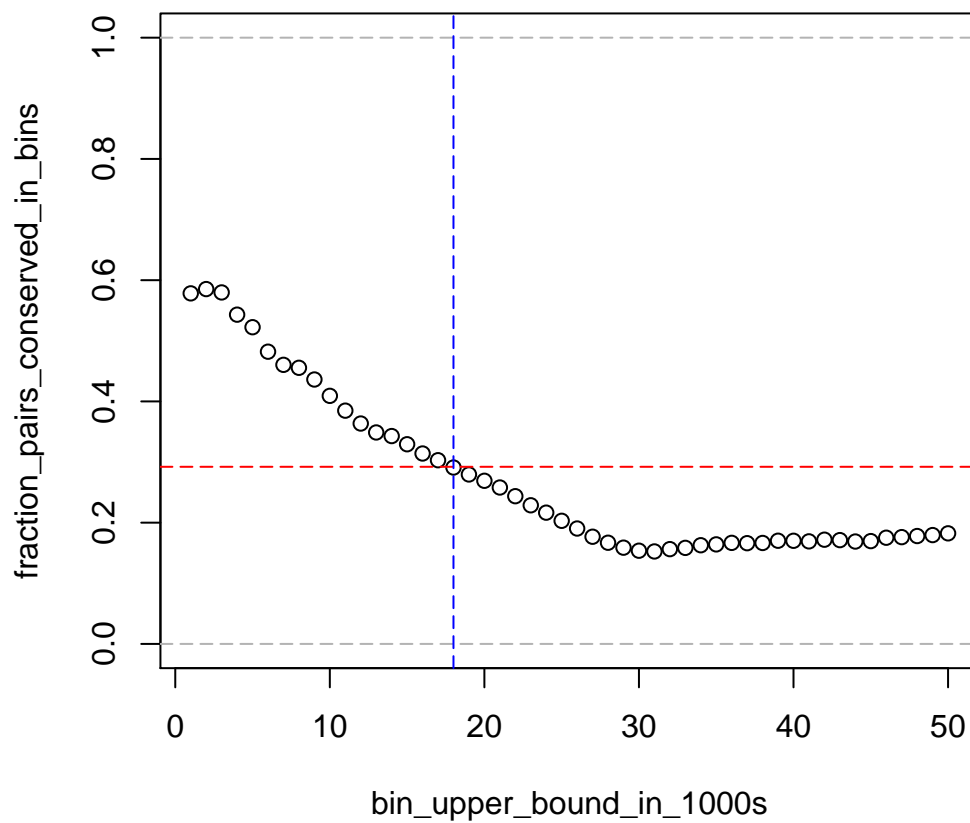

Supplement: s1 [file s1]

**Bin\_conservation\_minus\_bg\_MA-1D\_vs\_NYs-1**  
**PD-0.006956**

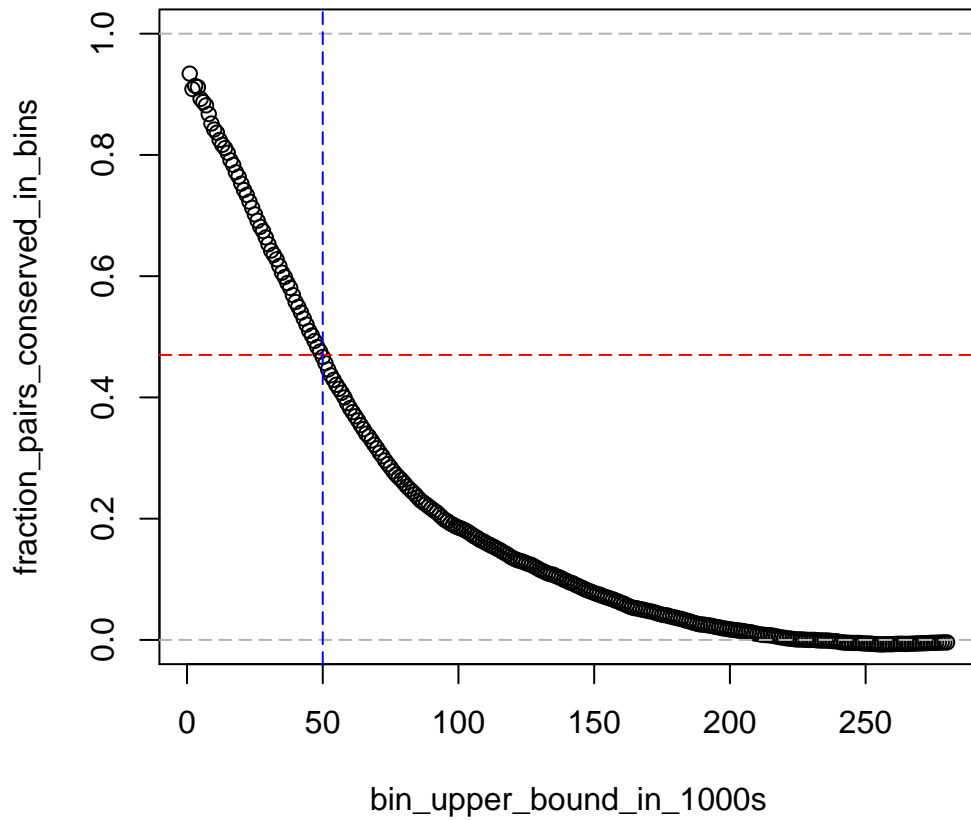

**Bin\_conservation\_minus\_bg\_MA-1D\_vs\_NYs-1**  
**PD-0.006956**

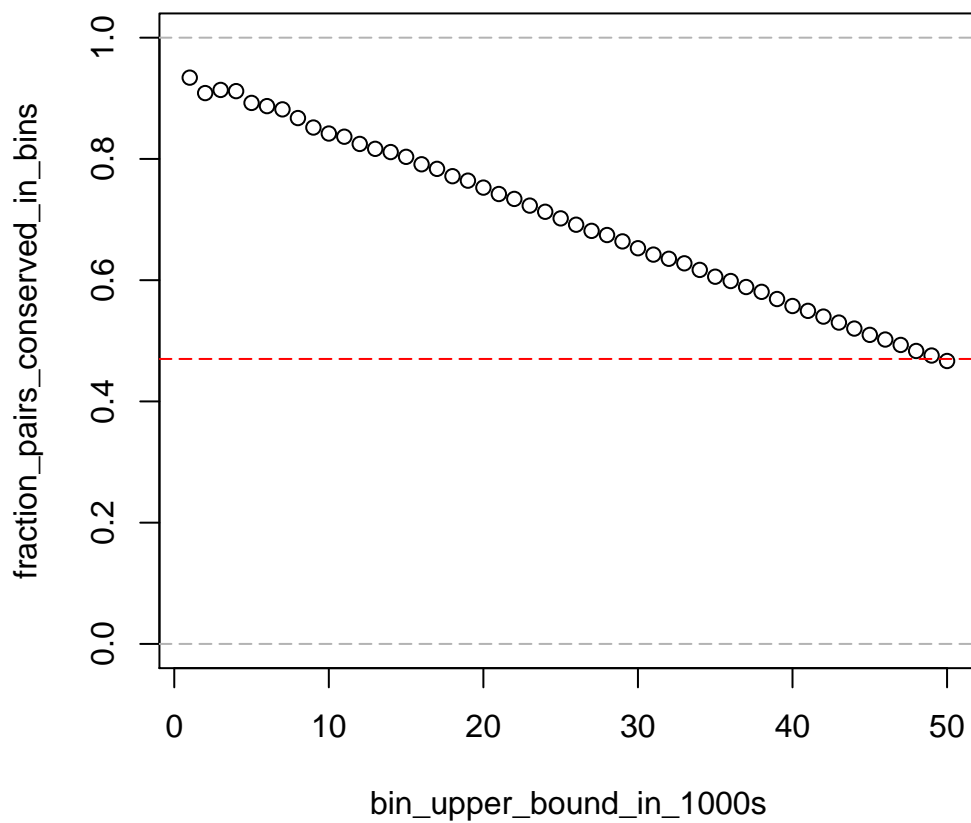

Supplement: s1 [file s1]

**Bin\_conservation\_minus\_bg\_GM0701.1\_vs\_OR0704.3**  
**PD-0.062075**

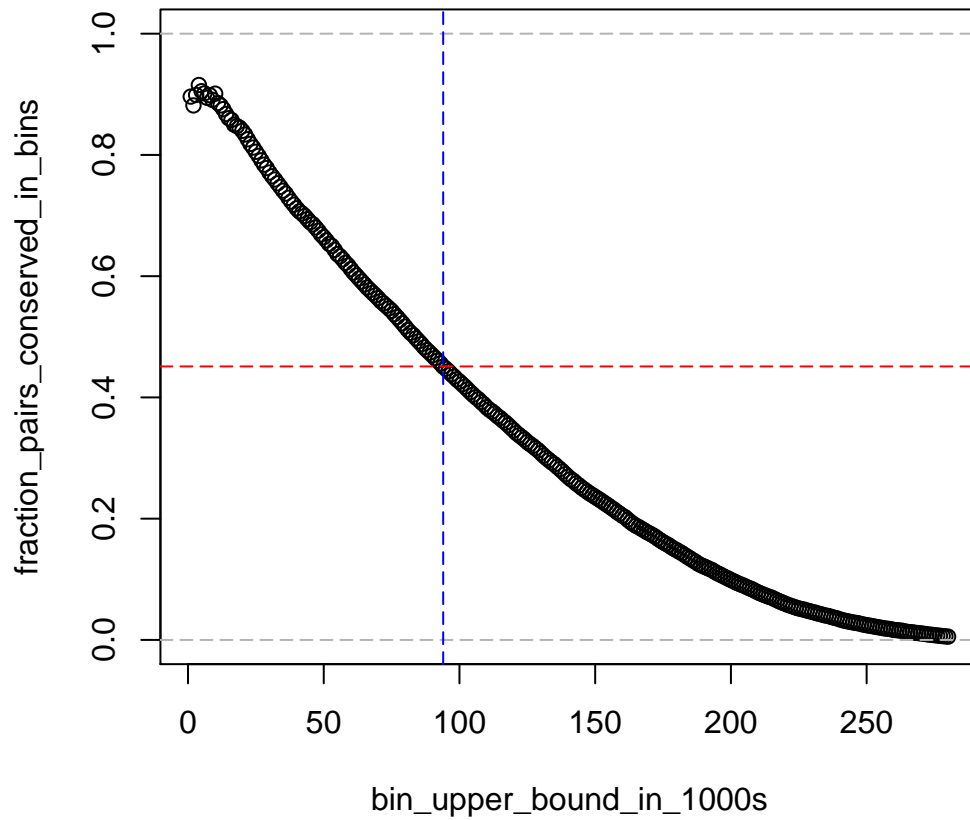

**Bin\_conservation\_minus\_bg\_GM0701.1\_vs\_OR0704.3**  
**PD-0.062075**

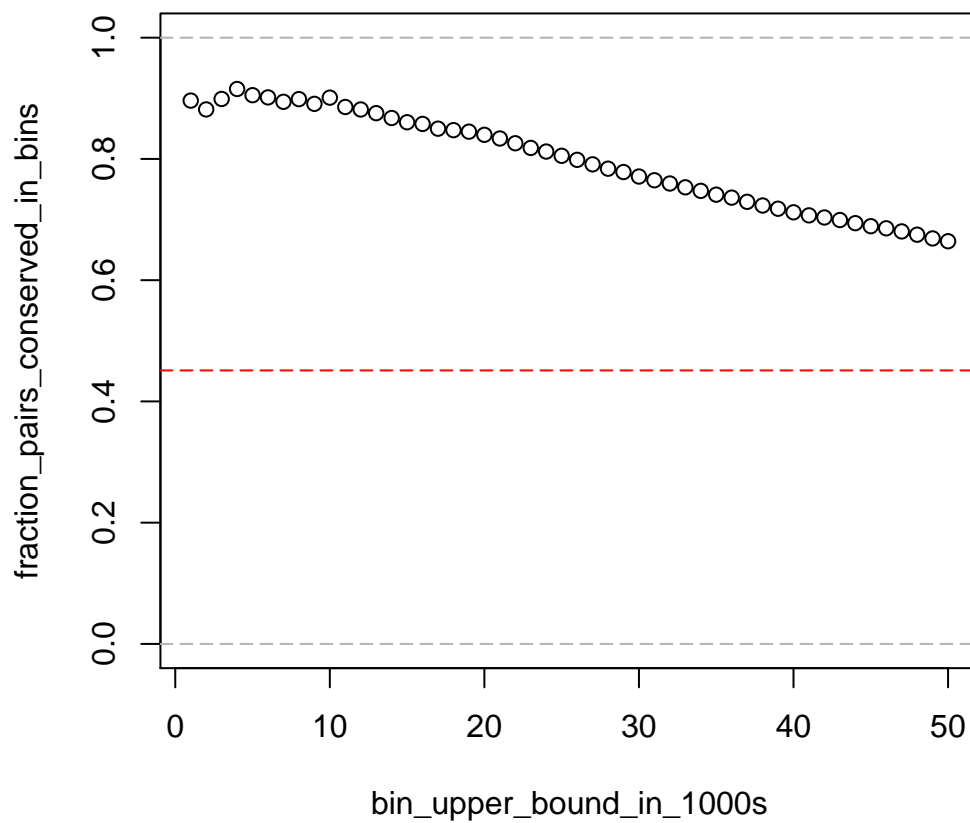

Supplement: s1 [file s1]

**Bin\_conservation\_minus\_bg\_ATCV1\_vs\_KS1B**  
**PD-0.692738**

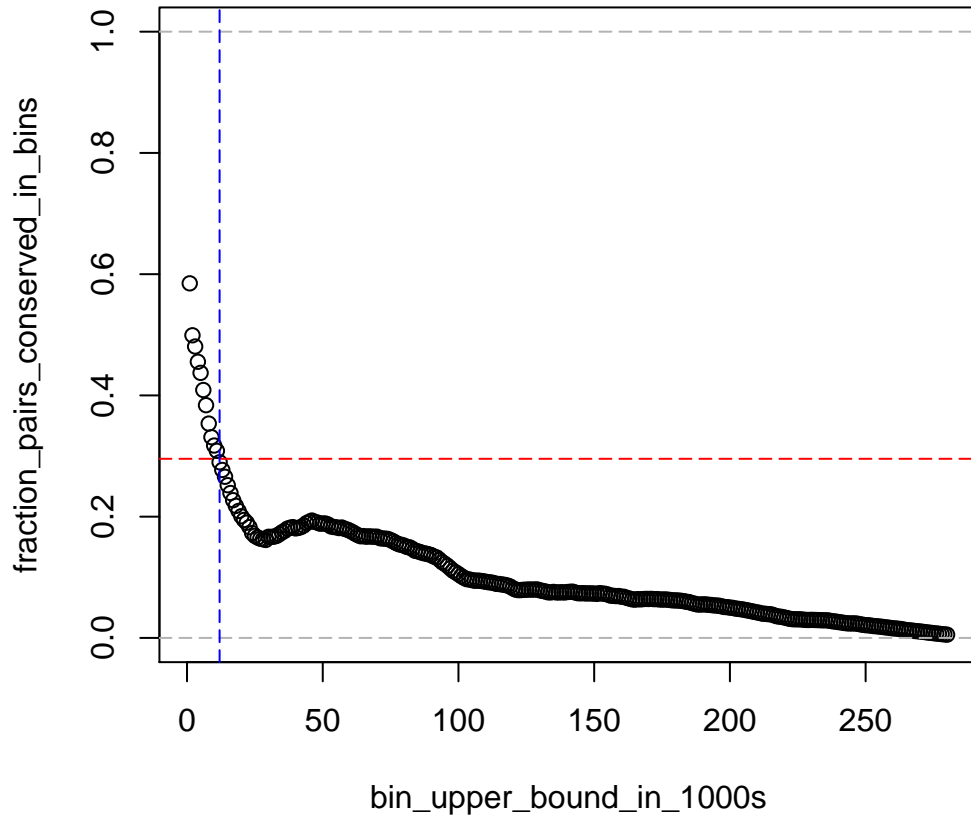

**Bin\_conservation\_minus\_bg\_ATCV1\_vs\_KS1B**  
**PD-0.692738**

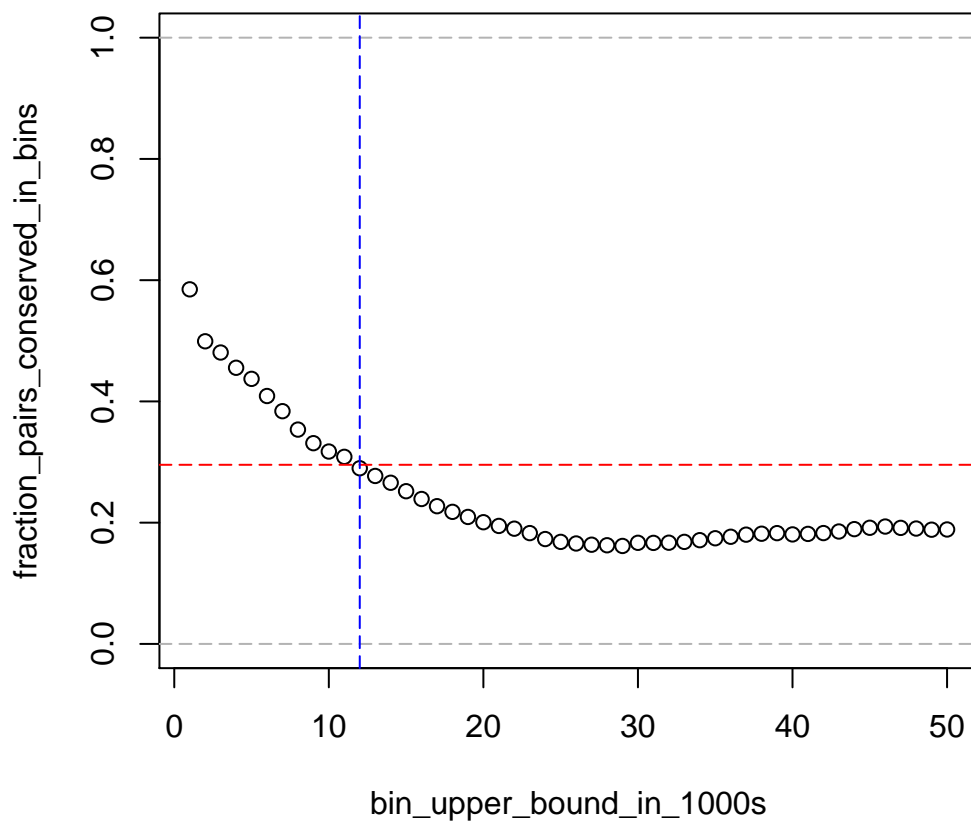

Supplement: s1 [file s1]

**Bin\_conservation\_minus\_bg\_CviKI\_vs\_MA-1E**  
**PD-0.003397**

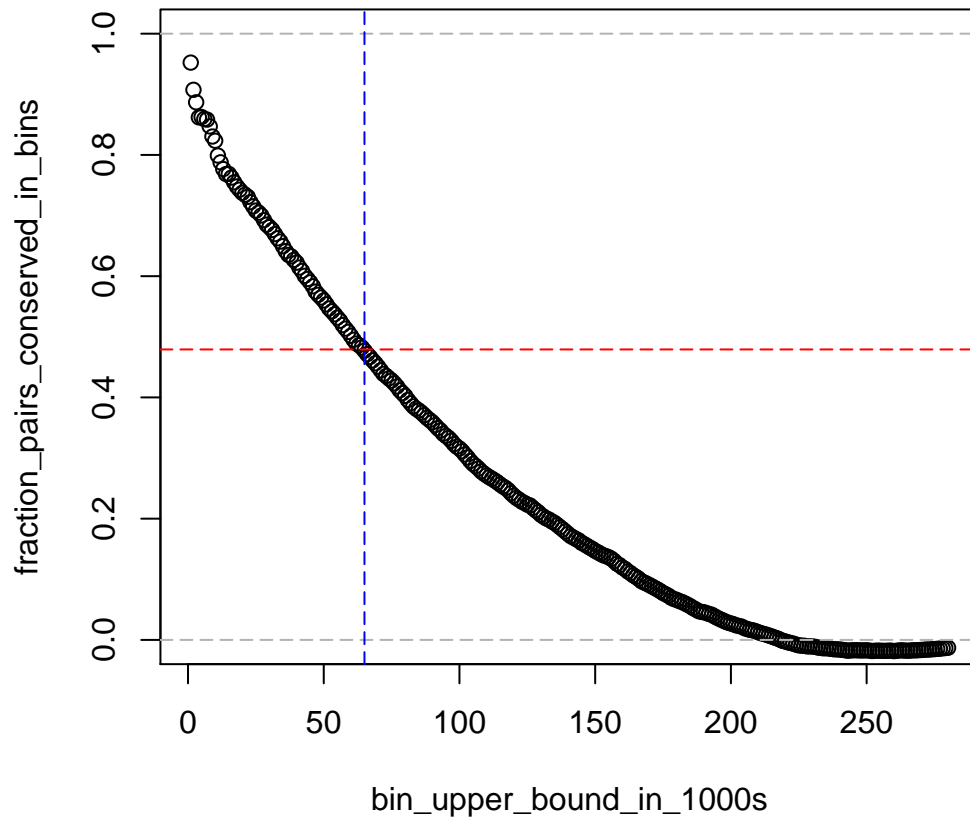

**Bin\_conservation\_minus\_bg\_CviKI\_vs\_MA-1E**  
**PD-0.003397**

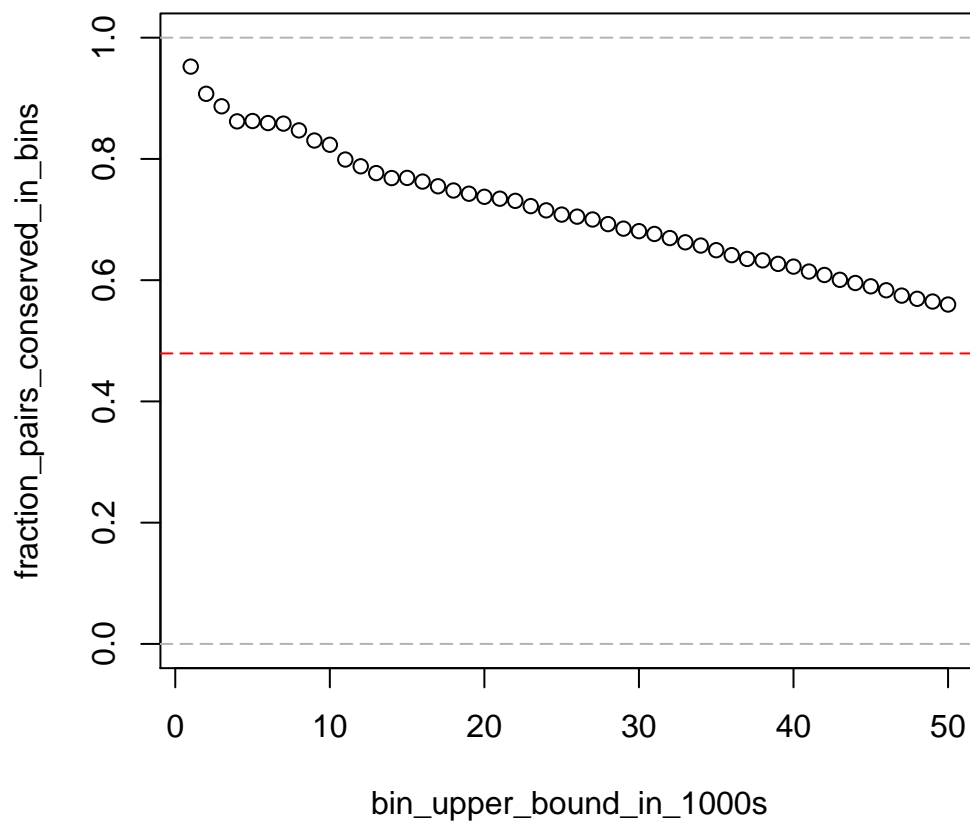

Supplement: s1 [file s1]

**Bin\_conservation\_minus\_bg\_AN69C\_vs\_NE-JV-1**  
**PD-0.670001**

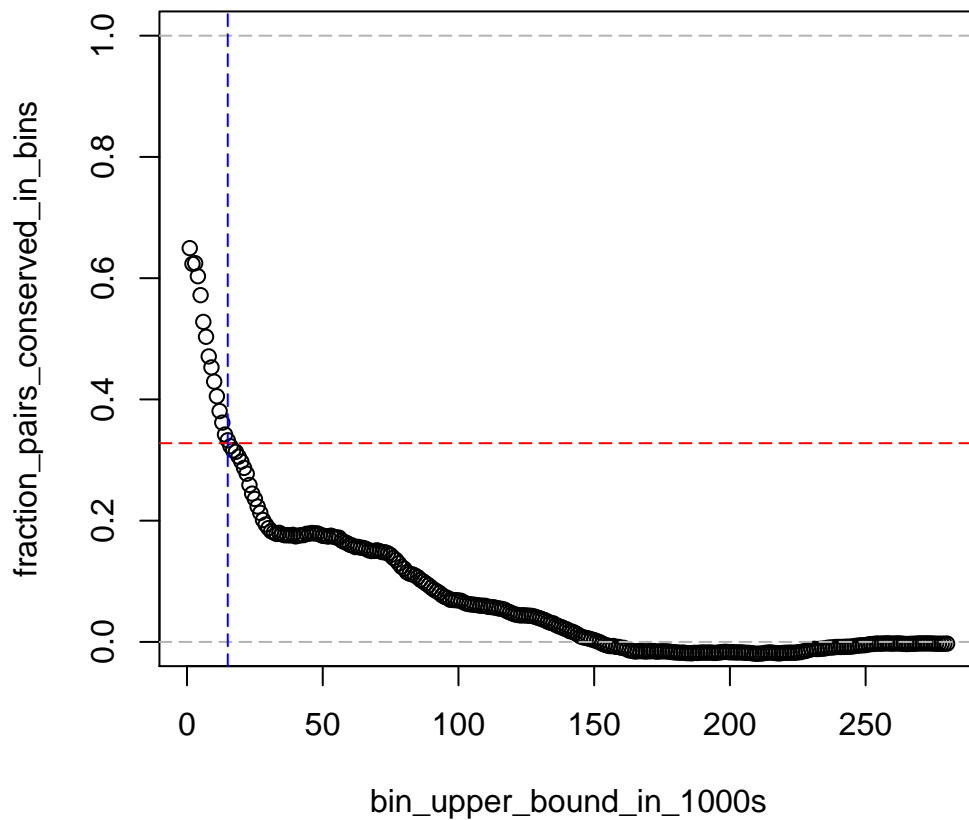

**Bin\_conservation\_minus\_bg\_AN69C\_vs\_NE-JV-1**  
**PD-0.670001**

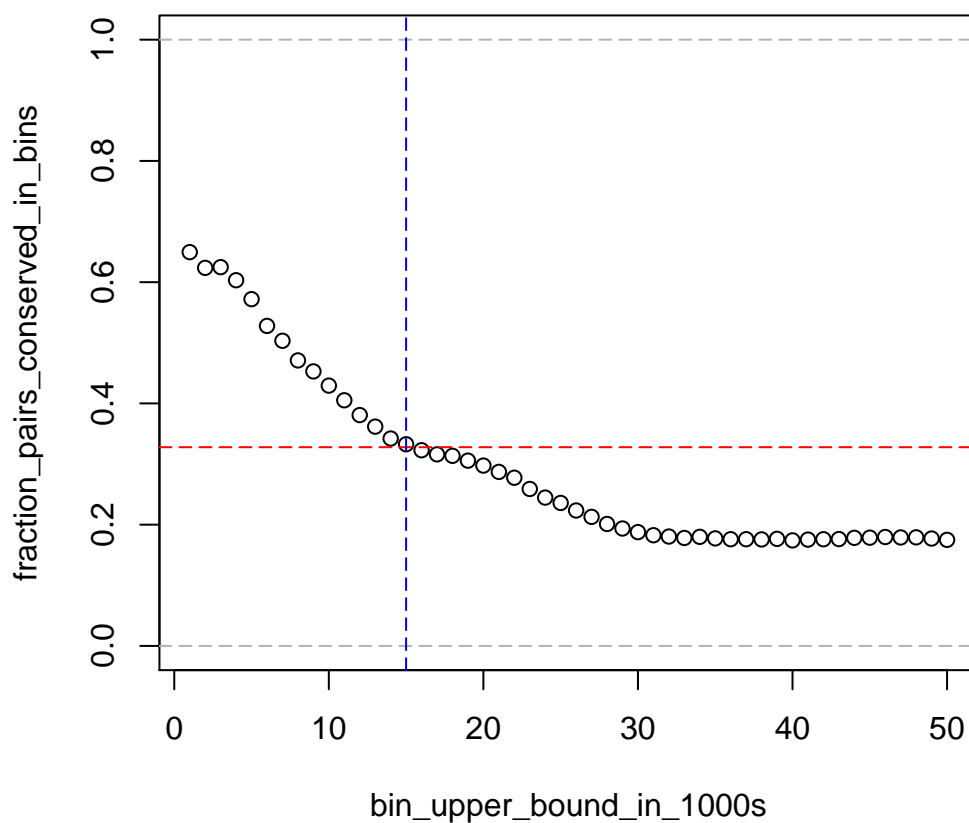

Supplement: s1 [file s1]

**Bin\_conservation\_minus\_bg\_IL-5-2s1\_vs\_NYs-1**  
**PD-0.009483**

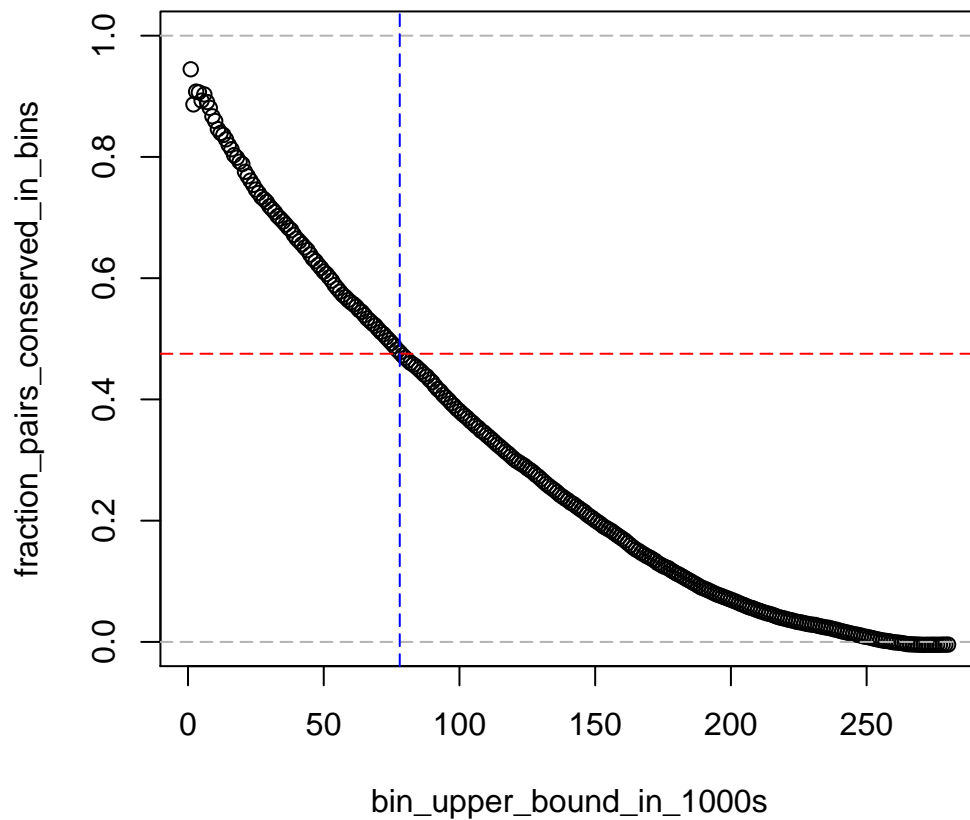

**Bin\_conservation\_minus\_bg\_IL-5-2s1\_vs\_NYs-1**  
**PD-0.009483**

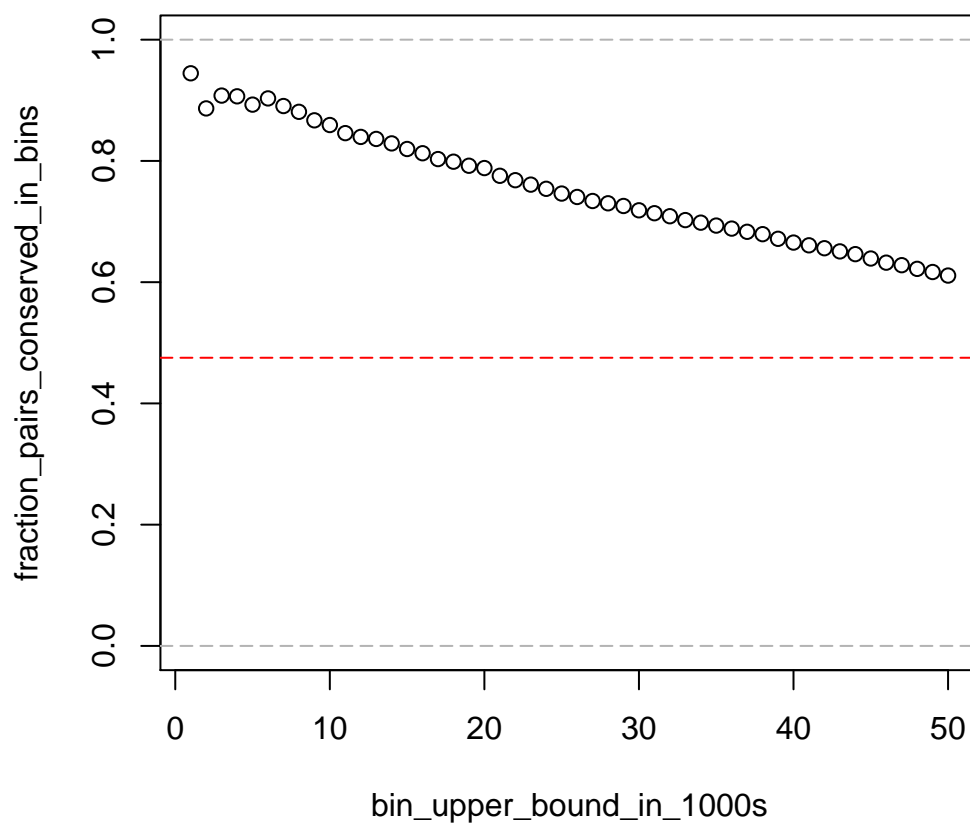

Supplement: s1 [file s1]

**Bin\_conservation\_minus\_bg\_Fr5L\_vs\_PBCV1**  
**PD-0.633881**

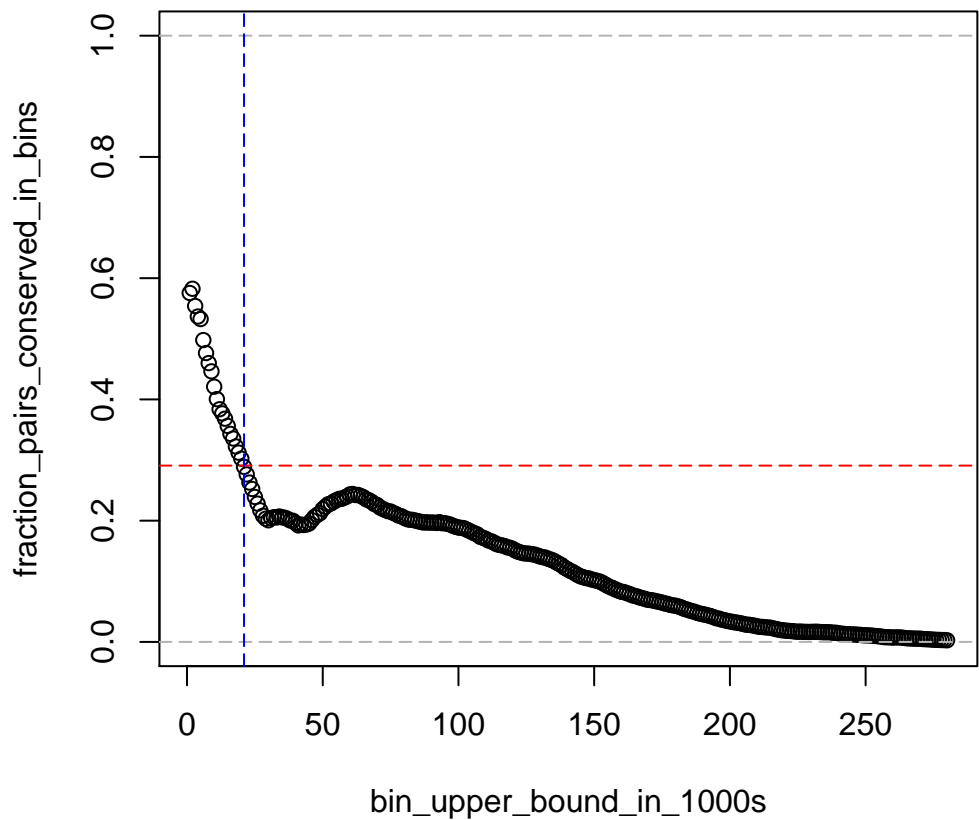

**Bin\_conservation\_minus\_bg\_Fr5L\_vs\_PBCV1**  
**PD-0.633881**

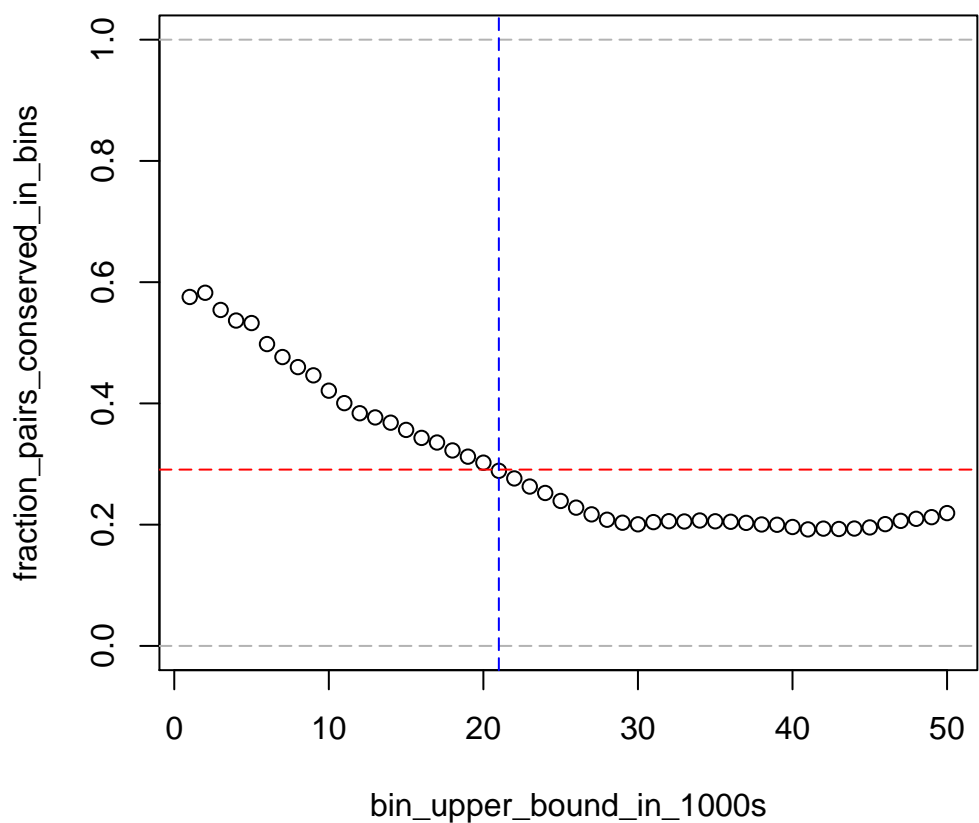

Supplement: s1 [file s1]

**Bin\_conservation\_minus\_bg\_NY2A\_vs\_WI0606**  
**PD-0.71393**

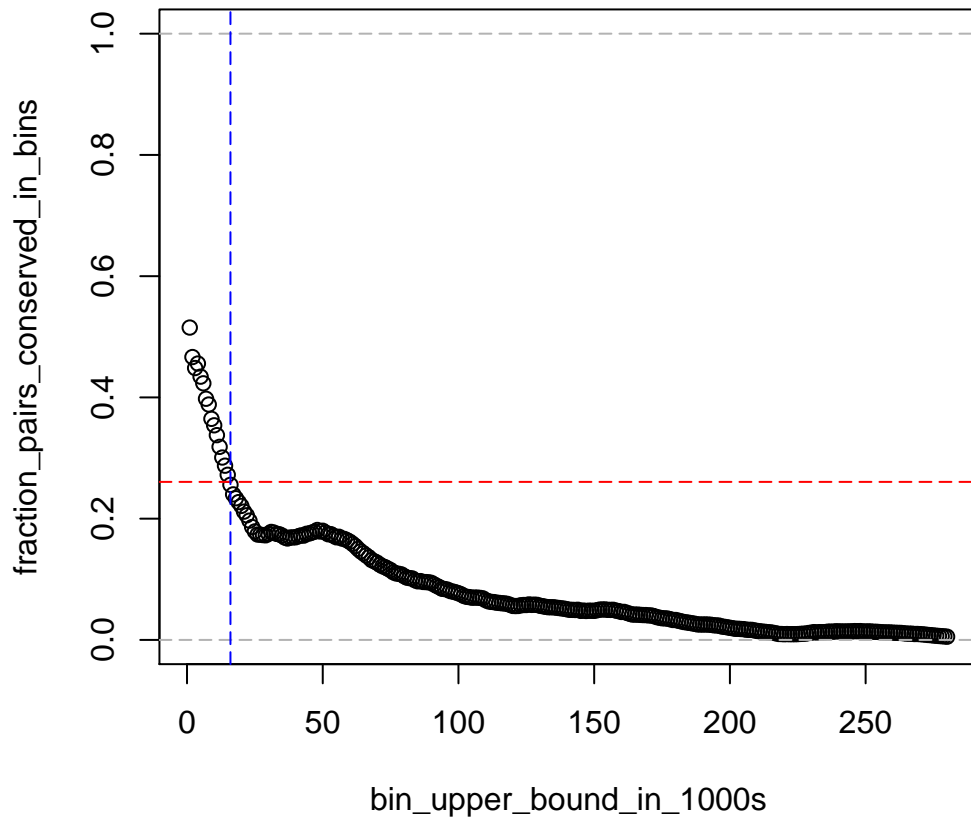

**Bin\_conservation\_minus\_bg\_NY2A\_vs\_WI0606**  
**PD-0.71393**

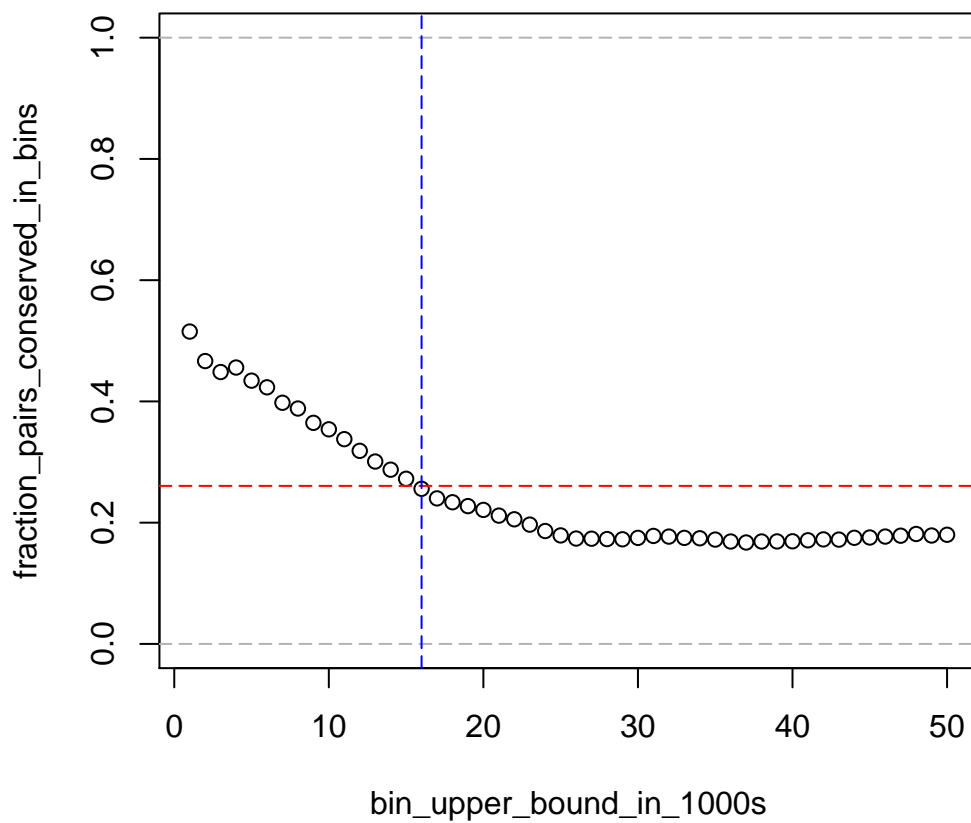

Supplement: s1 [file s1]

**Bin\_conservation\_minus\_bg\_AP110A\_vs\_TN603.4.2**  
**PD-0.452214**

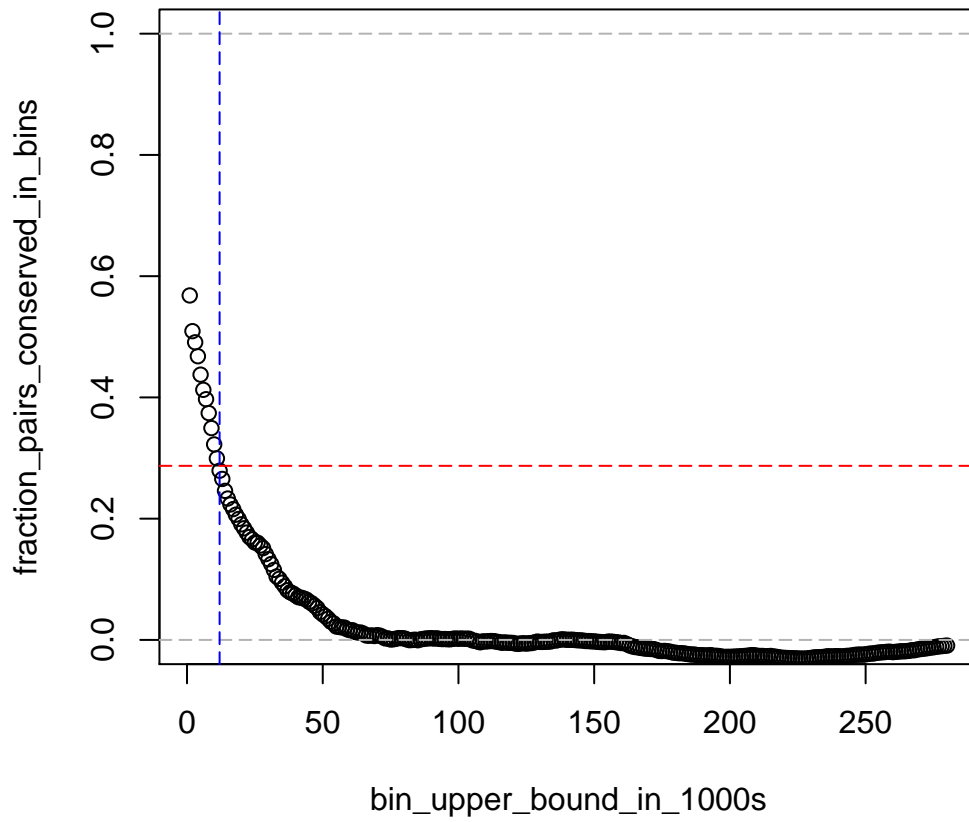

**Bin\_conservation\_minus\_bg\_AP110A\_vs\_TN603.4.2**  
**PD-0.452214**

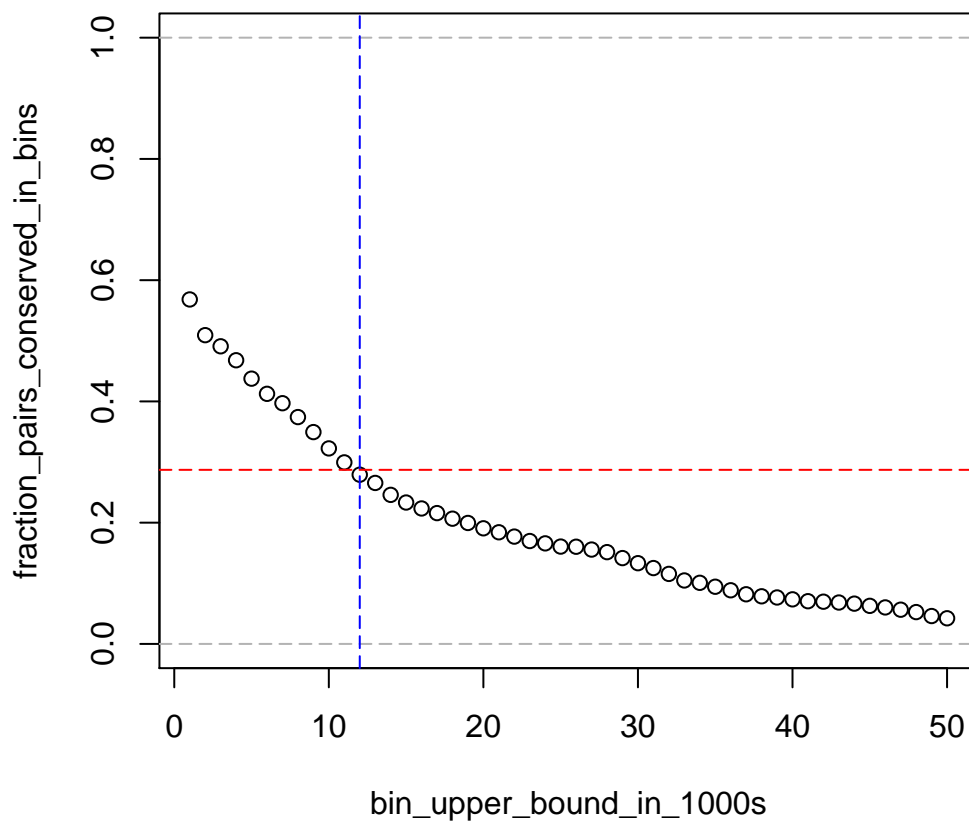

Supplement: s1 [file s1]

**Bin\_conservation\_minus\_bg\_CVB-1\_vs\_Fr5L**  
**PD-0.051677**

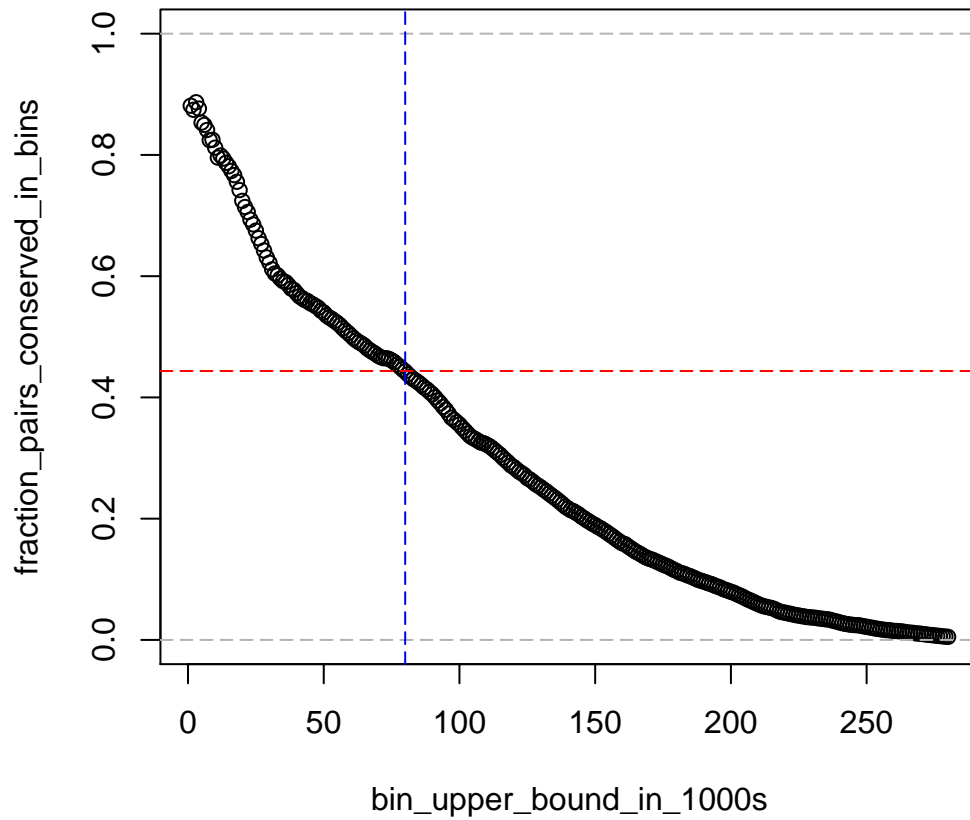

**Bin\_conservation\_minus\_bg\_CVB-1\_vs\_Fr5L**  
**PD-0.051677**

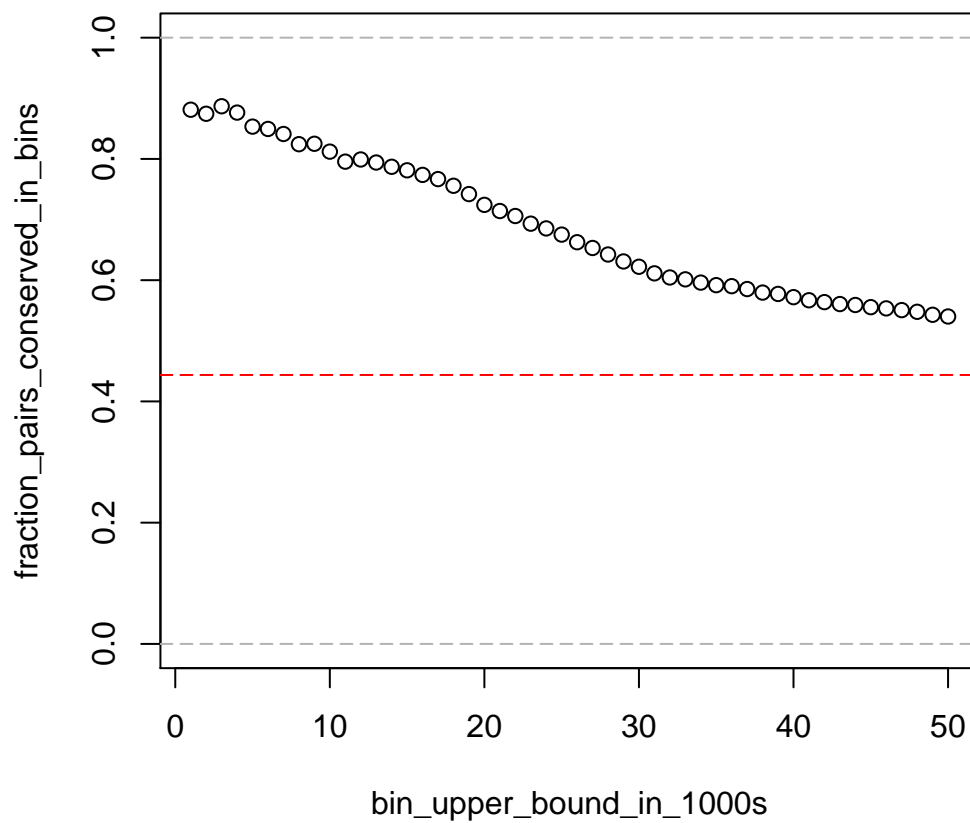

Supplement: s1 [file s1]

**Bin\_conservation\_minus\_bg\_AP110A\_vs\_WI0606**  
**PD-0.466579**

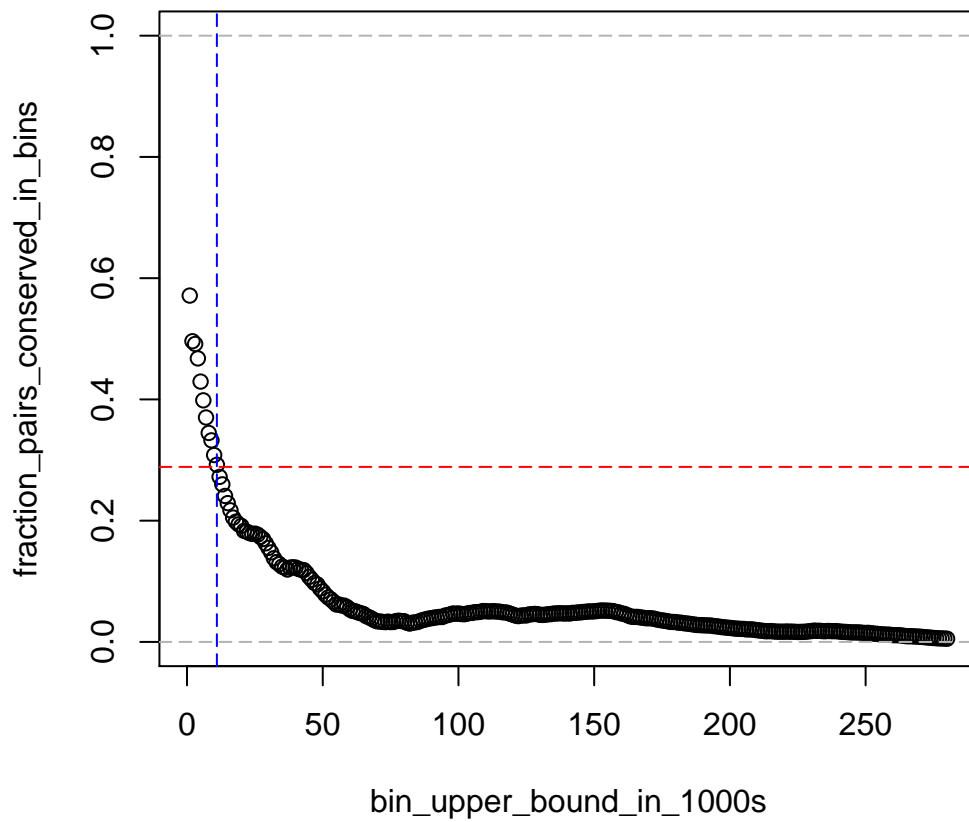

**Bin\_conservation\_minus\_bg\_AP110A\_vs\_WI0606**  
**PD-0.466579**

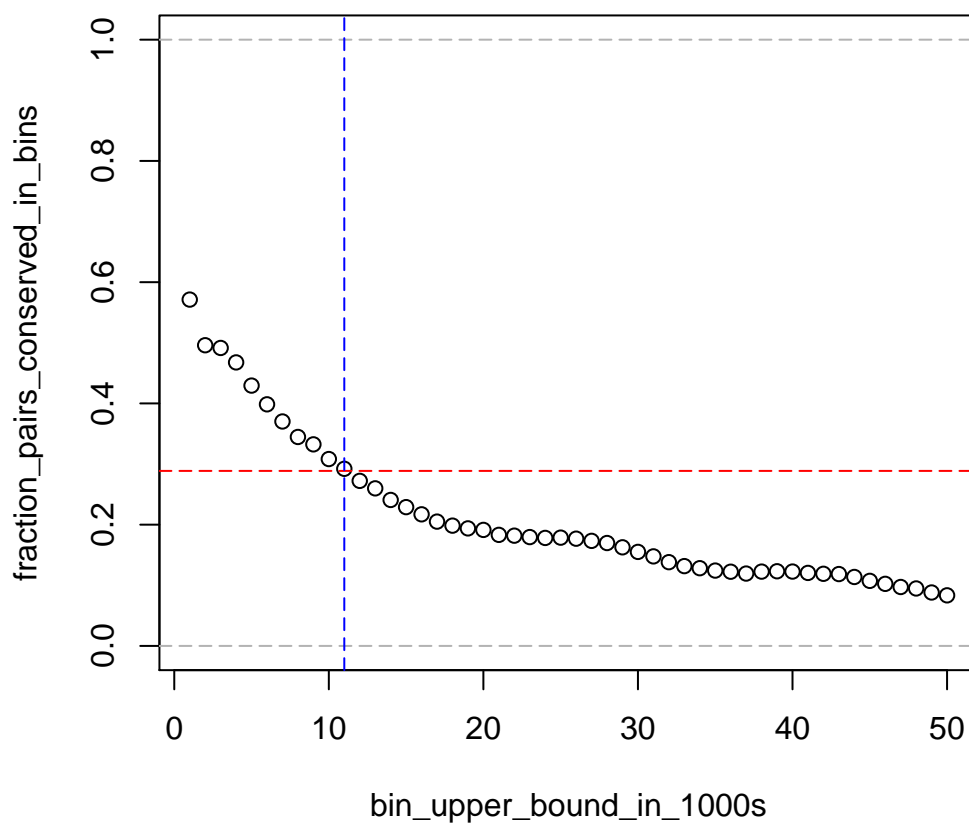

Supplement: s1 [file s1]
