# Supplementary figures and images for: Gene Gangs of the Chloroviruses: Conserved Clusters of Collinear Monocistronic Genes (part 2 of 9)
Source: MDPI journal article supplement (doi:10.3390/v10100576), 2018-10-20

**Bin\_conservation\_minus\_bg\_NE-JV-1\_vs\_NY-2B**  
**PD-0.697151**

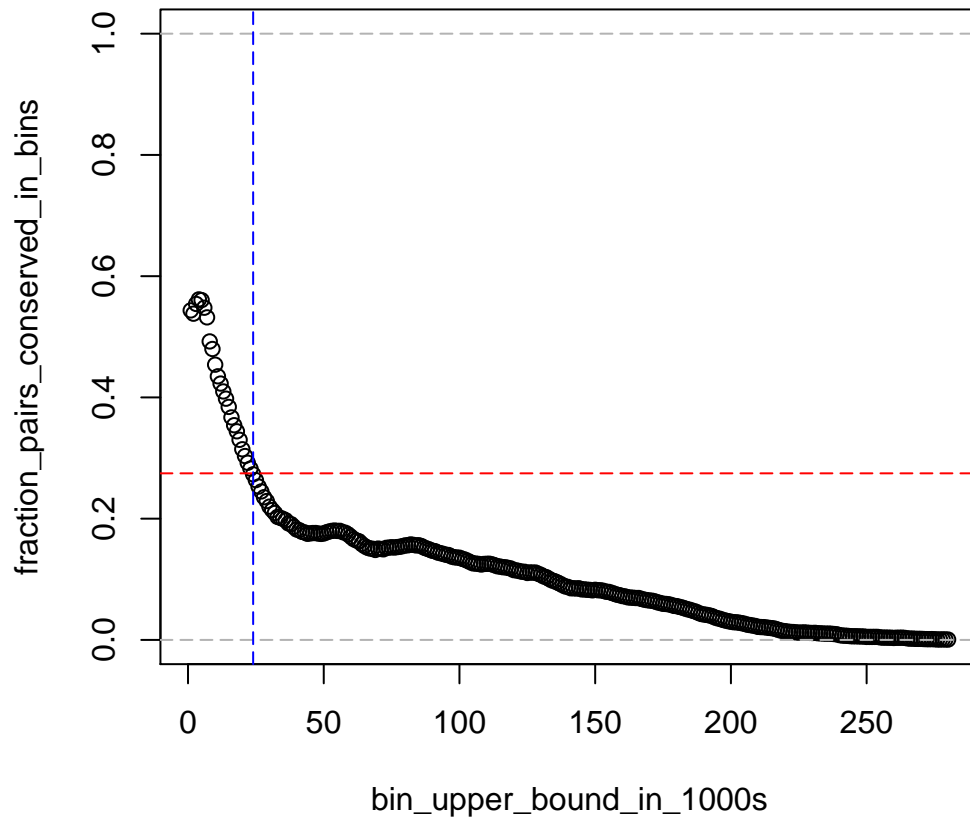

**Bin\_conservation\_minus\_bg\_NE-JV-1\_vs\_NY-2B**  
**PD-0.697151**

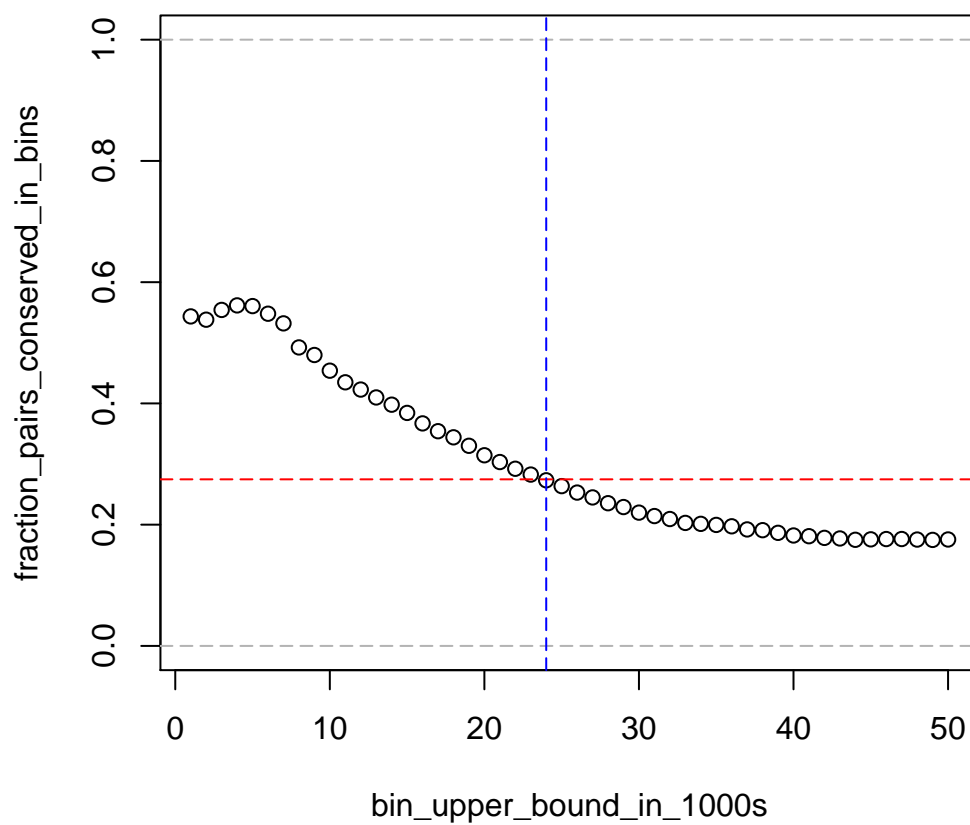

Supplement: s1 [file s1]

**Bin\_conservation\_minus\_bg\_Canal-1\_vs\_MA-1D**  
**PD-0.701447**

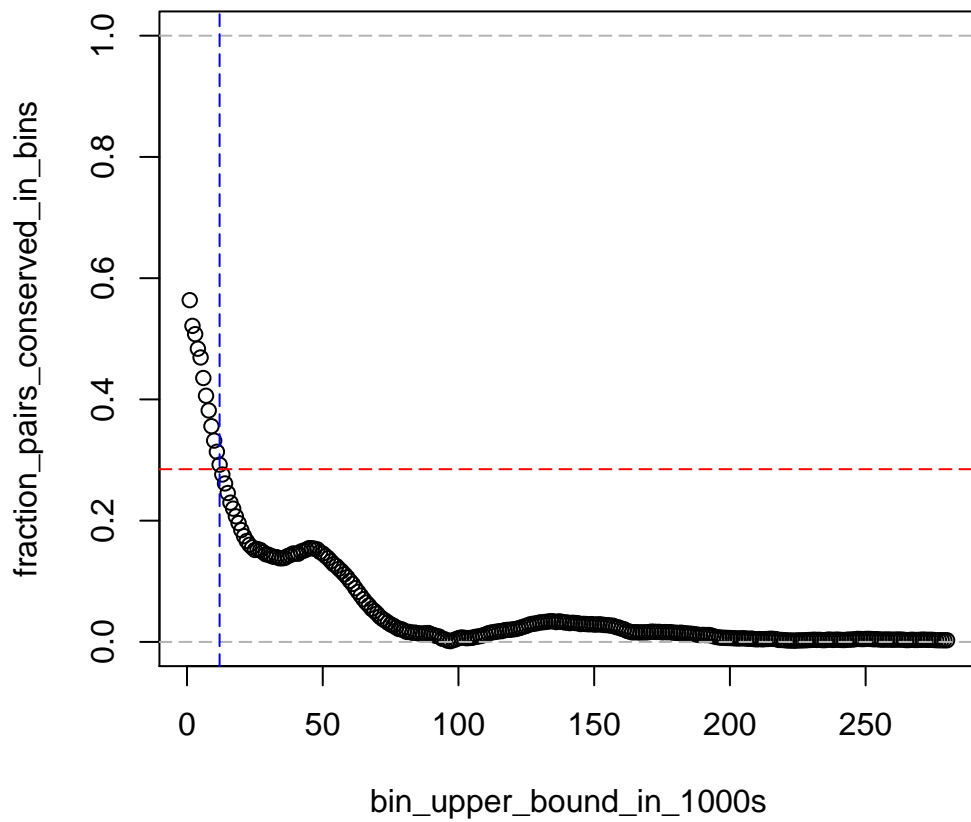

**Bin\_conservation\_minus\_bg\_Canal-1\_vs\_MA-1D**  
**PD-0.701447**

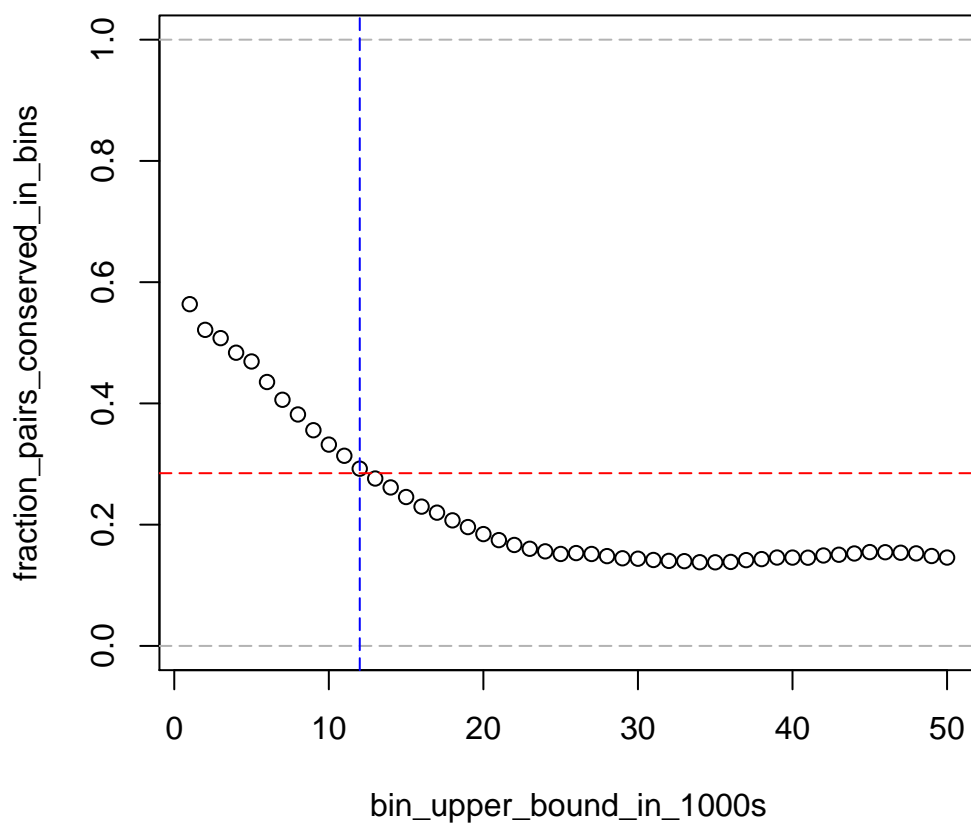

Supplement: s1 [file s1]

**Bin\_conservation\_minus\_bg\_CVB-1\_vs\_NE-JV-4**  
**PD-0.655449**

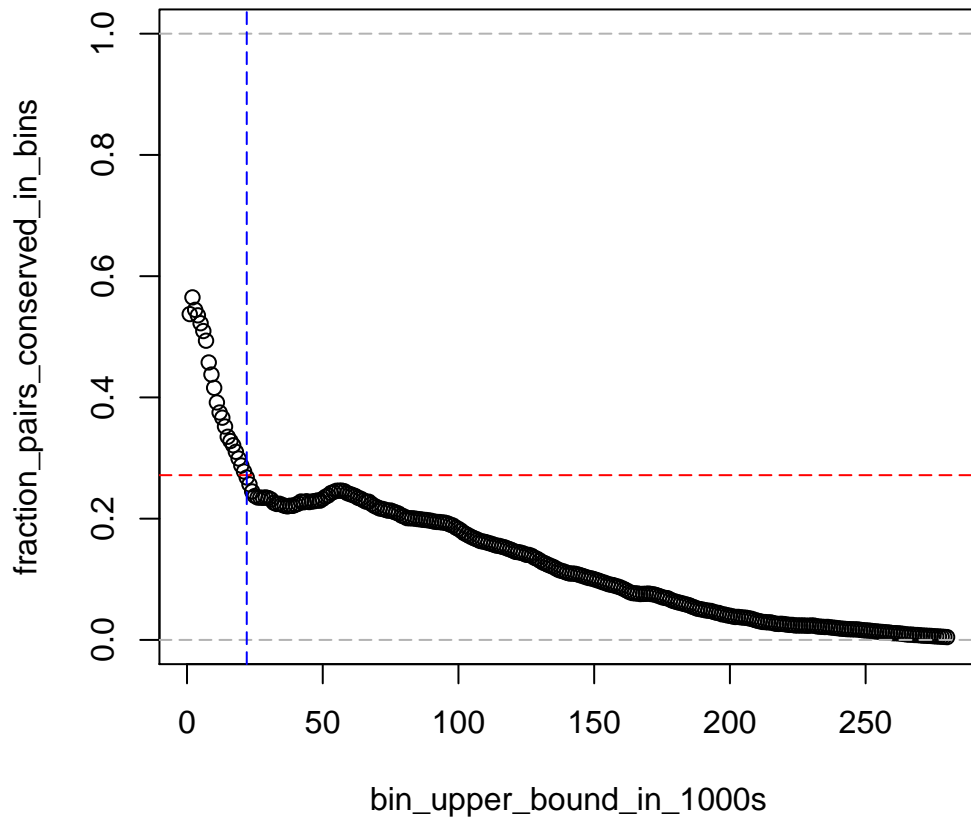

**Bin\_conservation\_minus\_bg\_CVB-1\_vs\_NE-JV-4**  
**PD-0.655449**

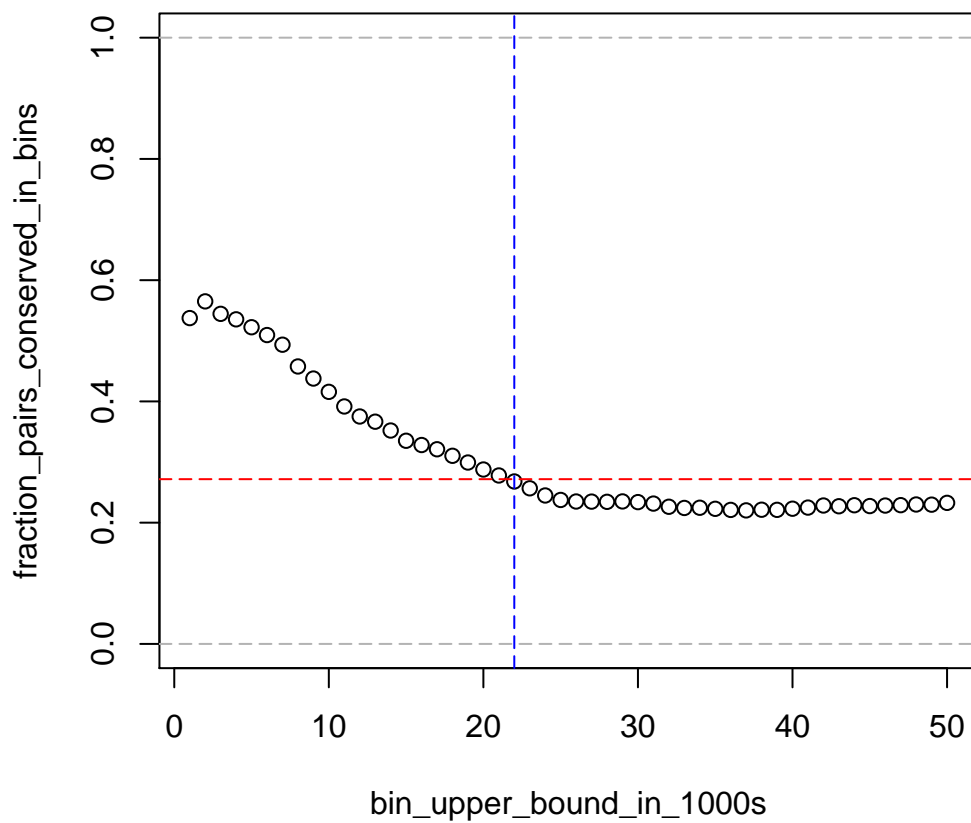

Supplement: s1 [file s1]

**Bin\_conservation\_minus\_bg\_Can18-4\_vs\_MT325**  
**PD-0.020423**

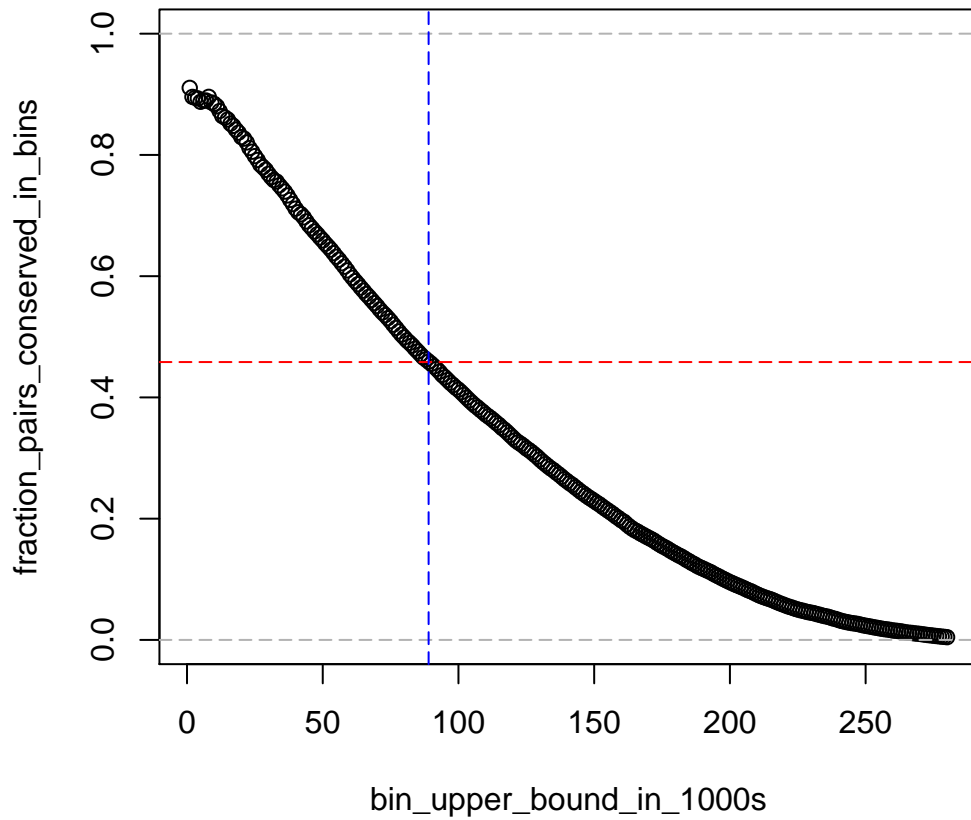

**Bin\_conservation\_minus\_bg\_Can18-4\_vs\_MT325**  
**PD-0.020423**

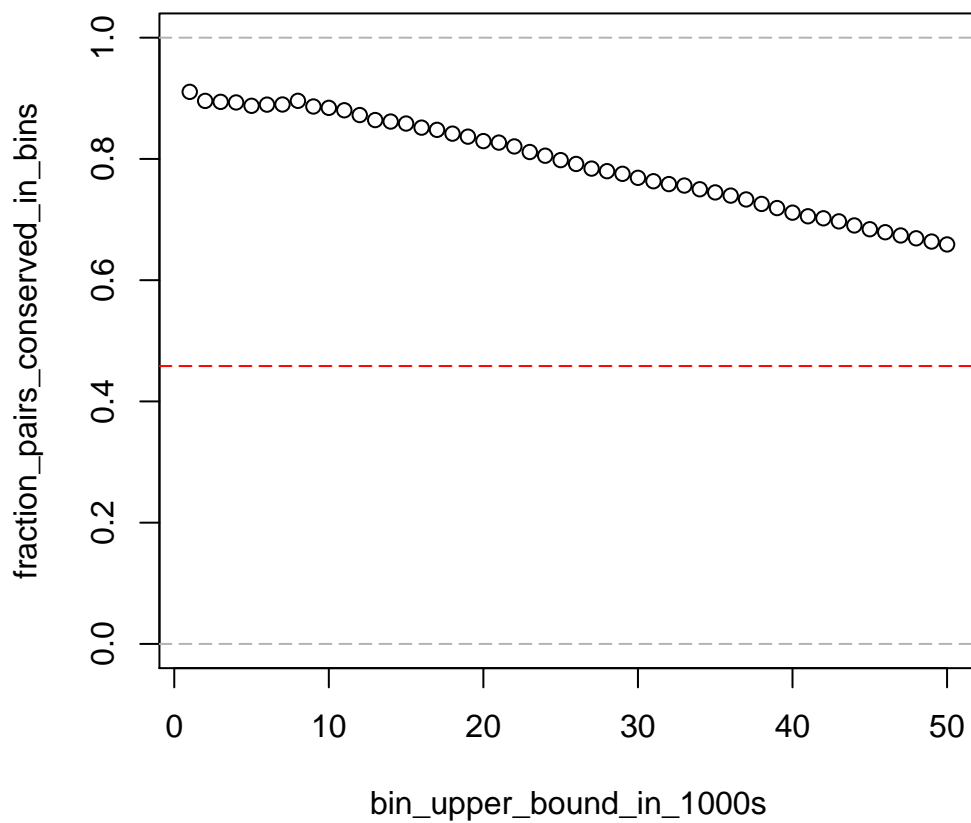

Supplement: s1 [file s1]

**Bin\_conservation\_minus\_bg\_Can18-4\_vs\_Fr5L**  
**PD-0.045563**

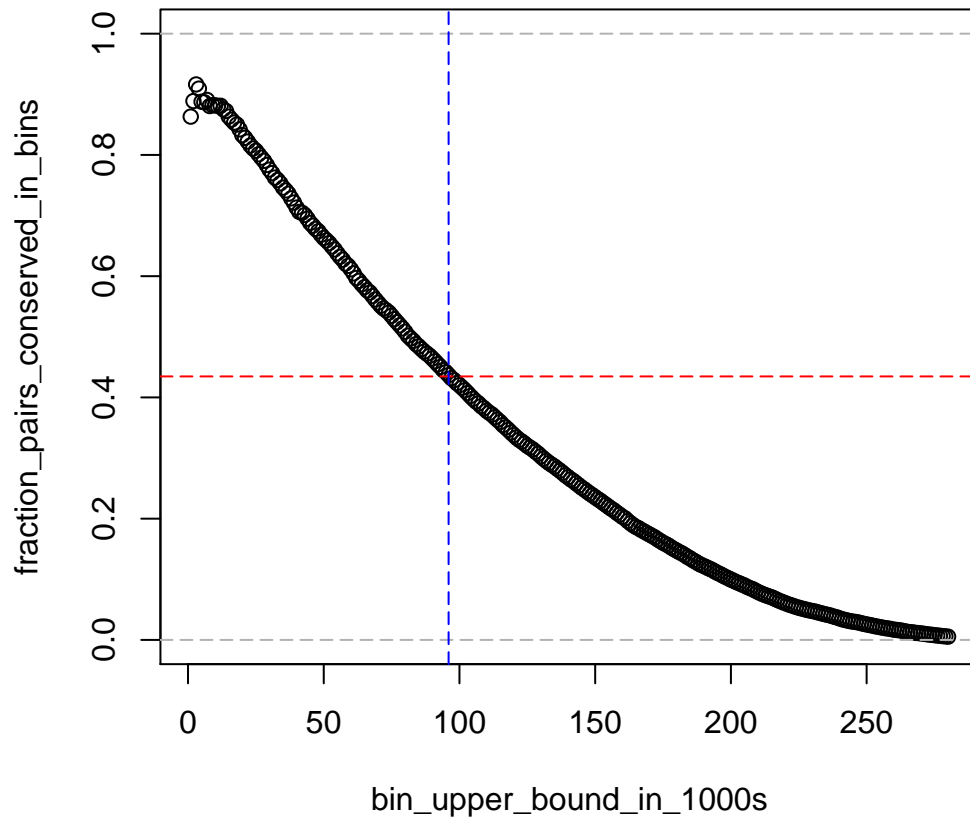

**Bin\_conservation\_minus\_bg\_Can18-4\_vs\_Fr5L**  
**PD-0.045563**

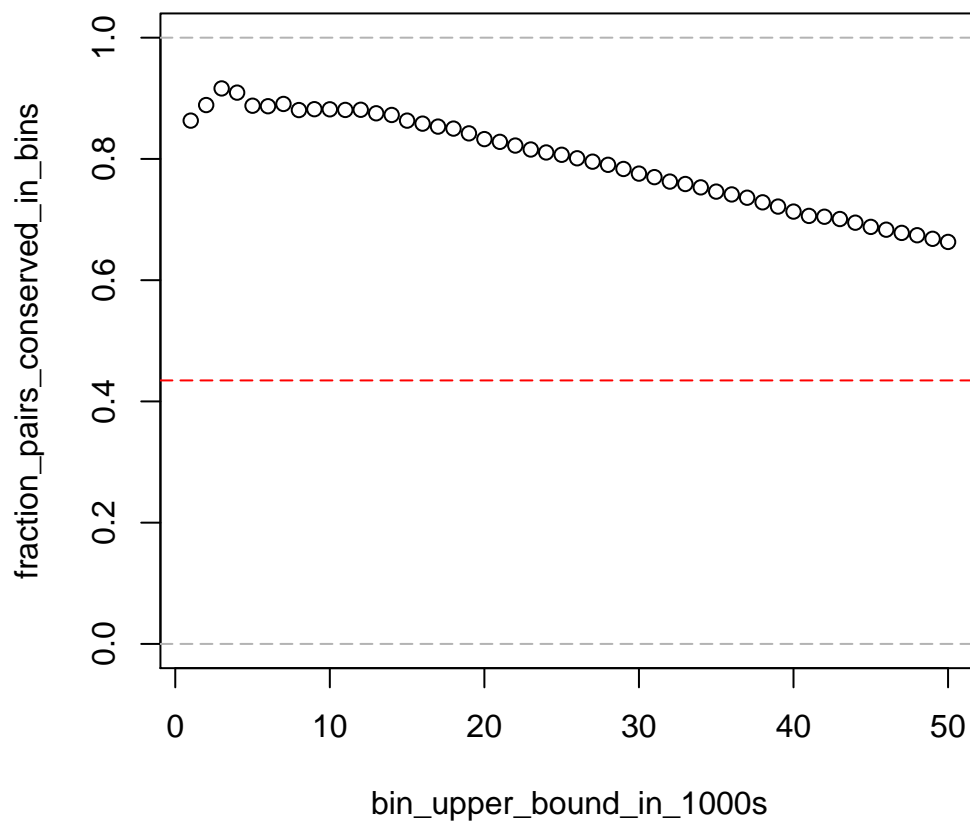

Supplement: s1 [file s1]

**Bin\_conservation\_minus\_bg\_Br0604L\_vs\_NY2A**  
**PD-0.699179**

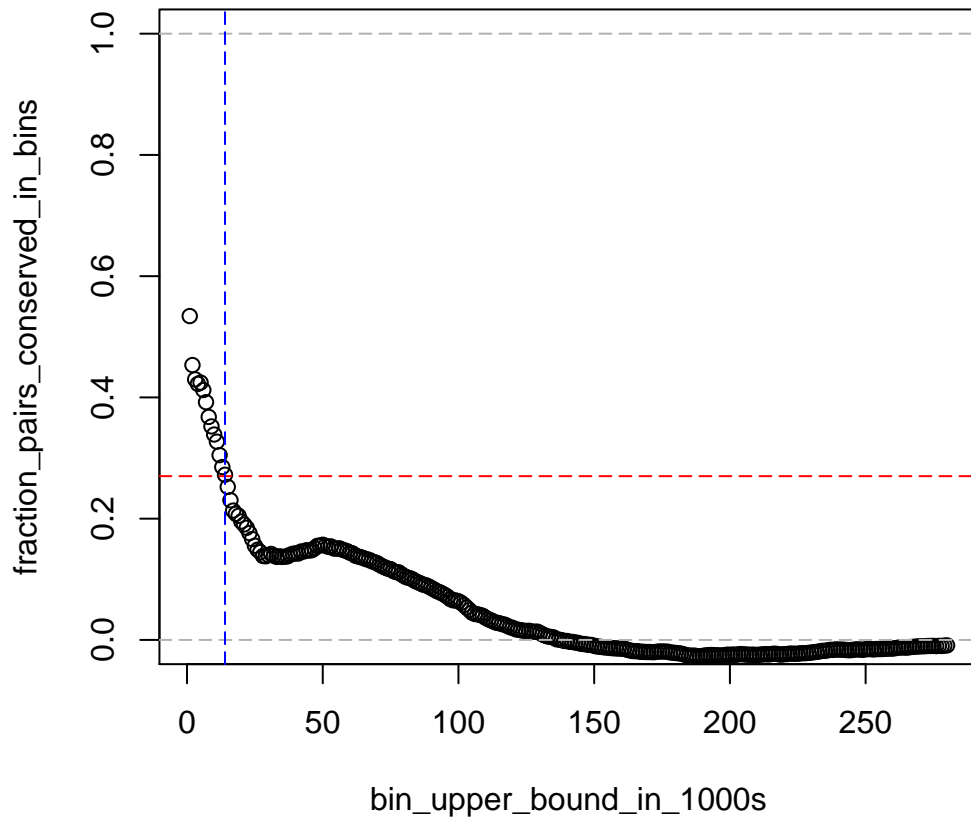

**Bin\_conservation\_minus\_bg\_Br0604L\_vs\_NY2A**  
**PD-0.699179**

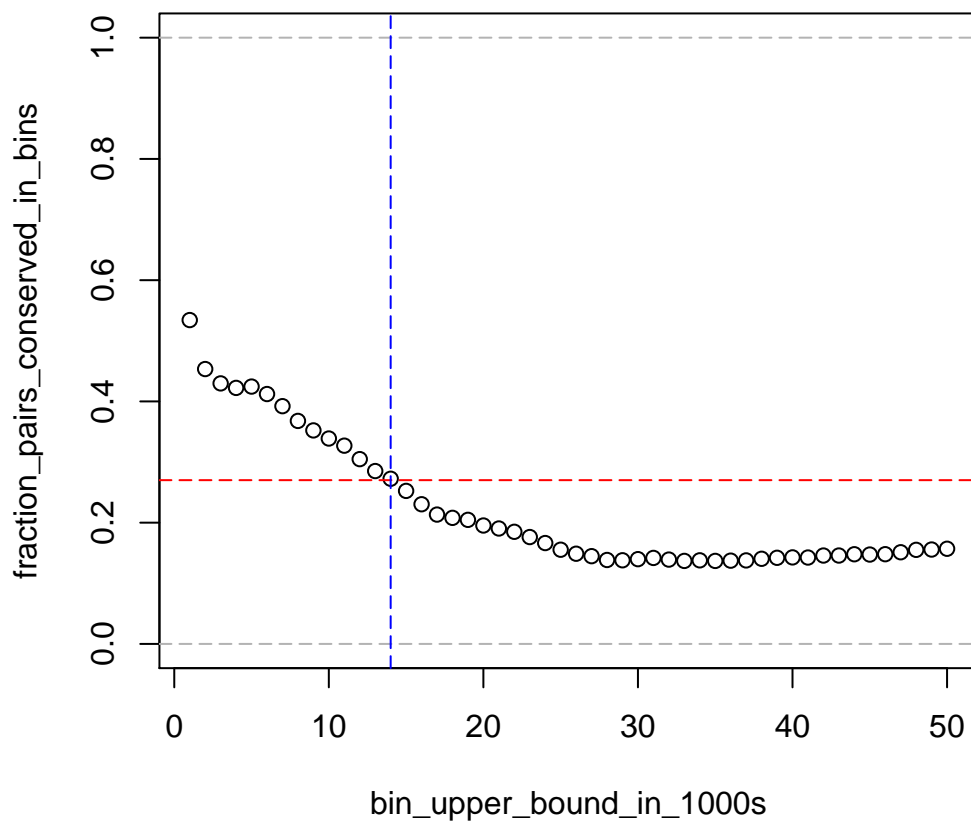

Supplement: s1 [file s1]

**Bin\_conservation\_minus\_bg\_Canal-1\_vs\_NY-2B**  
**PD-0.705965**

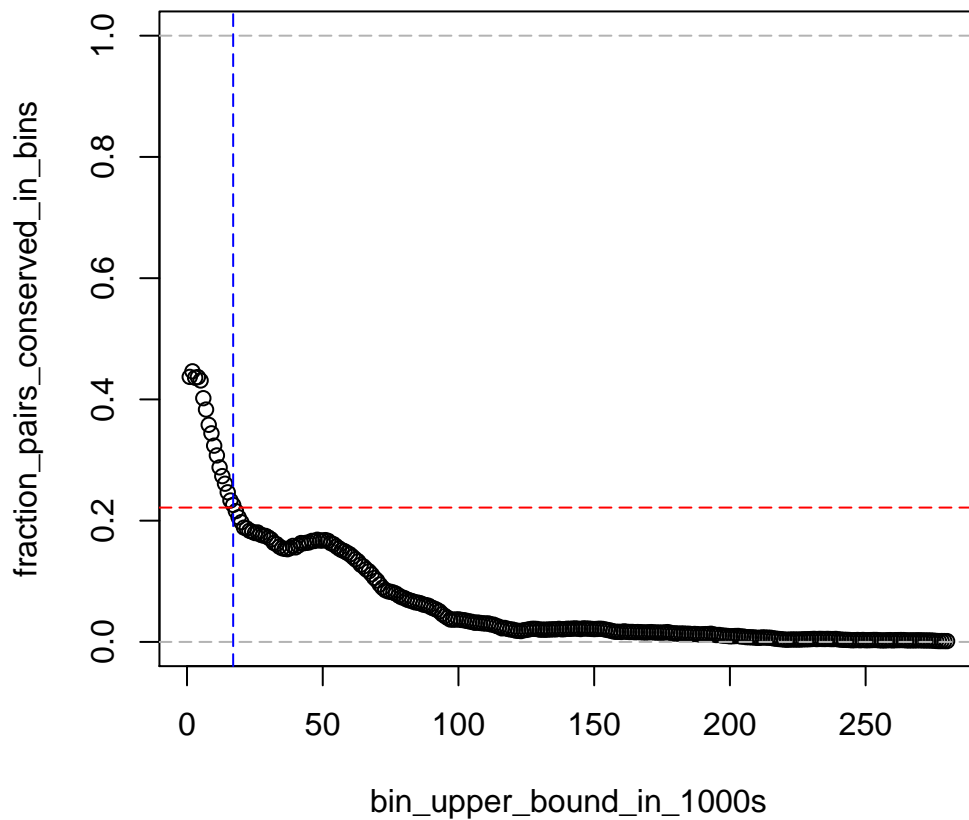

**Bin\_conservation\_minus\_bg\_Canal-1\_vs\_NY-2B**  
**PD-0.705965**

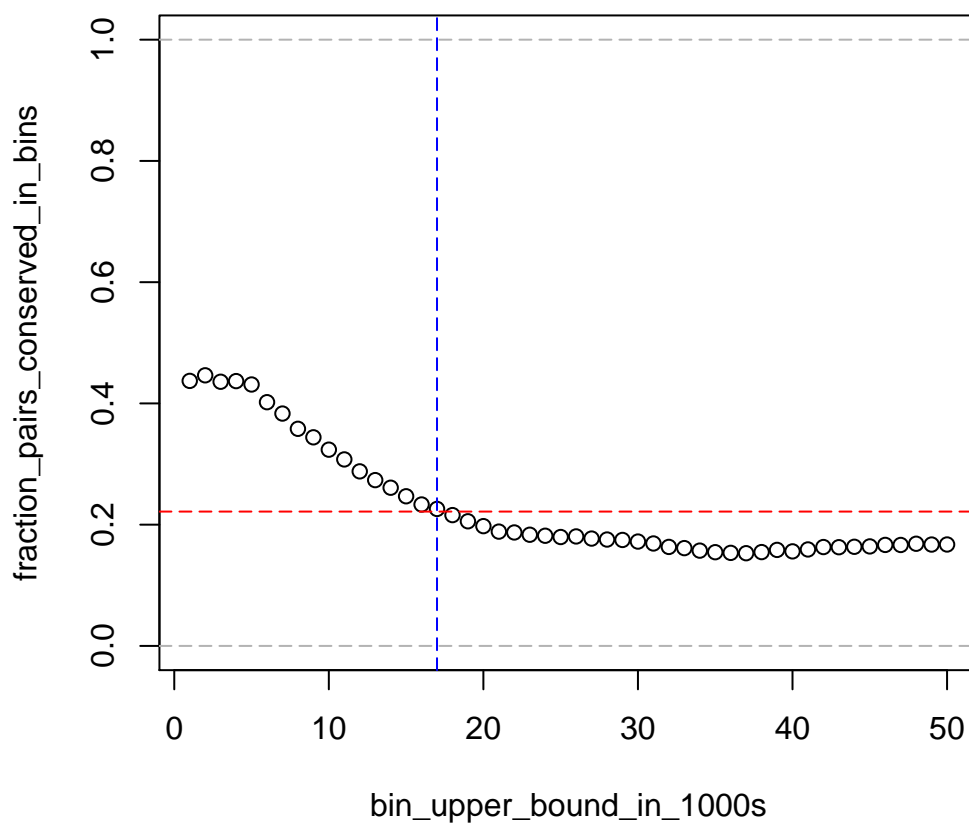

Supplement: s1 [file s1]

**Bin\_conservation\_minus\_bg\_CVG-1\_vs\_NW665.2**  
**PD-0.01318**

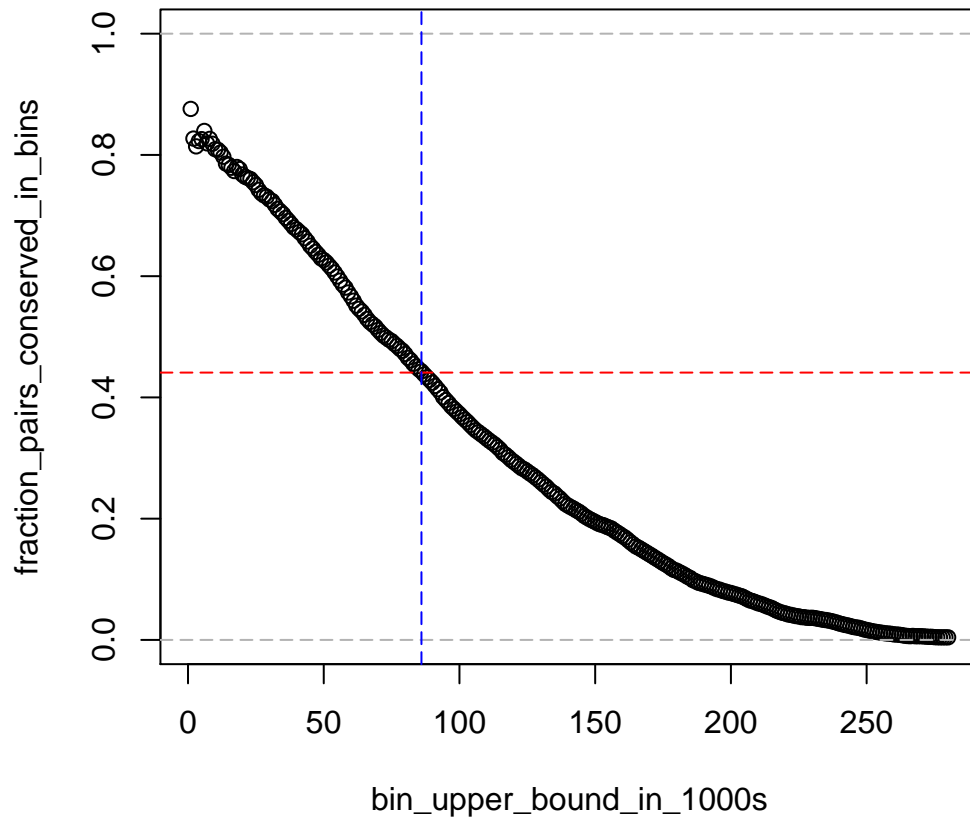

**Bin\_conservation\_minus\_bg\_CVG-1\_vs\_NW665.2**  
**PD-0.01318**

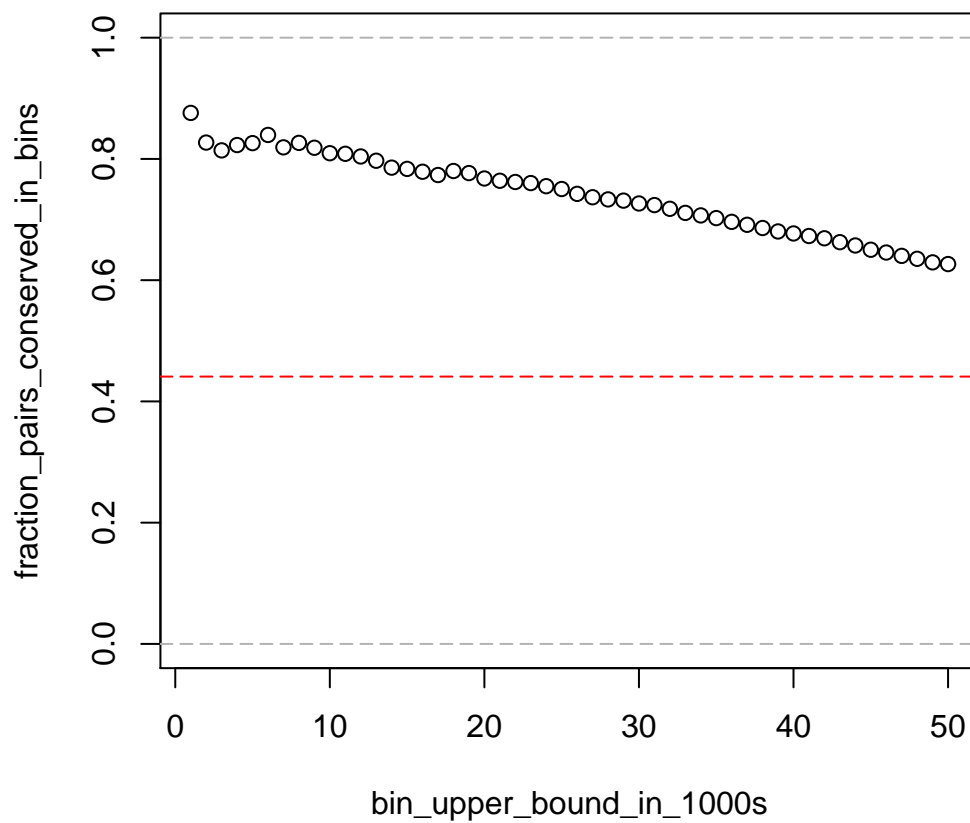

Supplement: s1 [file s1]

**Bin\_conservation\_minus\_bg\_MA-1D\_vs\_NW665.2**  
**PD-0.661975**

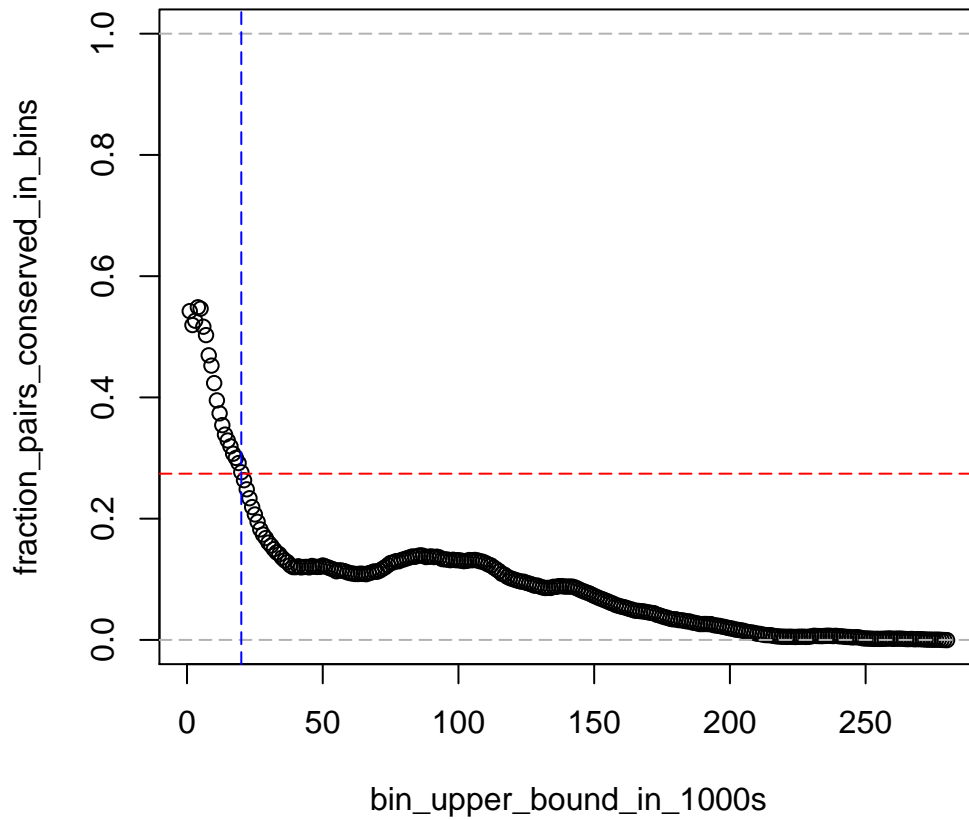

**Bin\_conservation\_minus\_bg\_MA-1D\_vs\_NW665.2**  
**PD-0.661975**

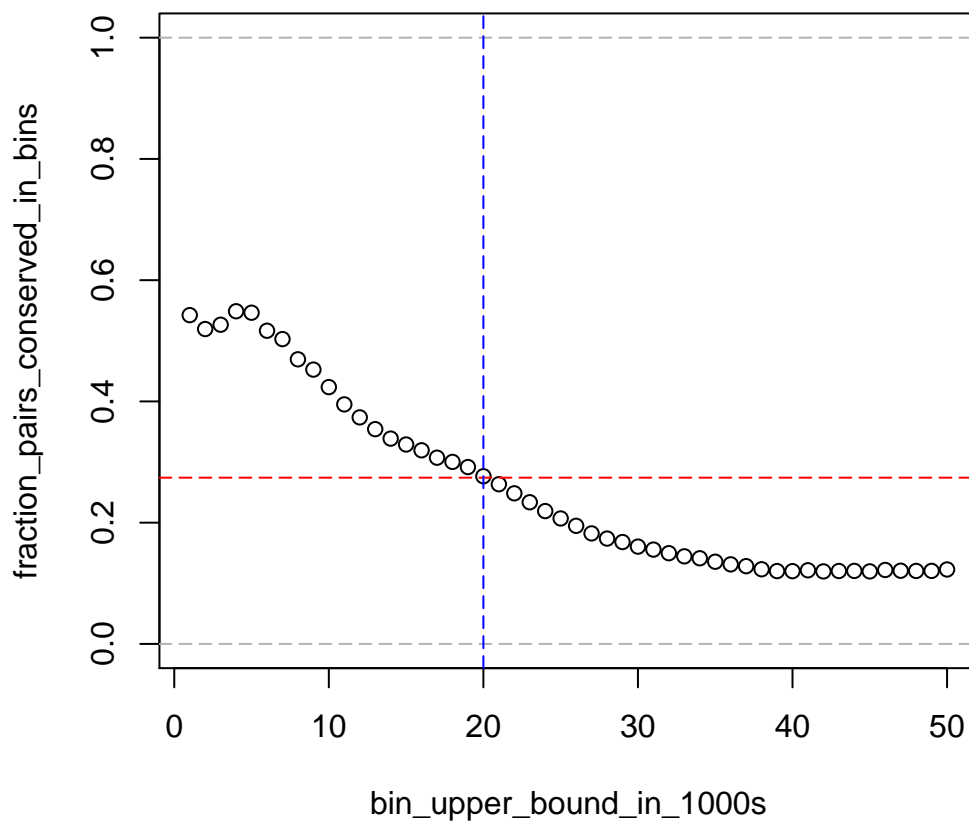

Supplement: s1 [file s1]

**Bin\_conservation\_minus\_bg\_IL-3A\_vs\_NE-JV-1**  
**PD-0.672978**

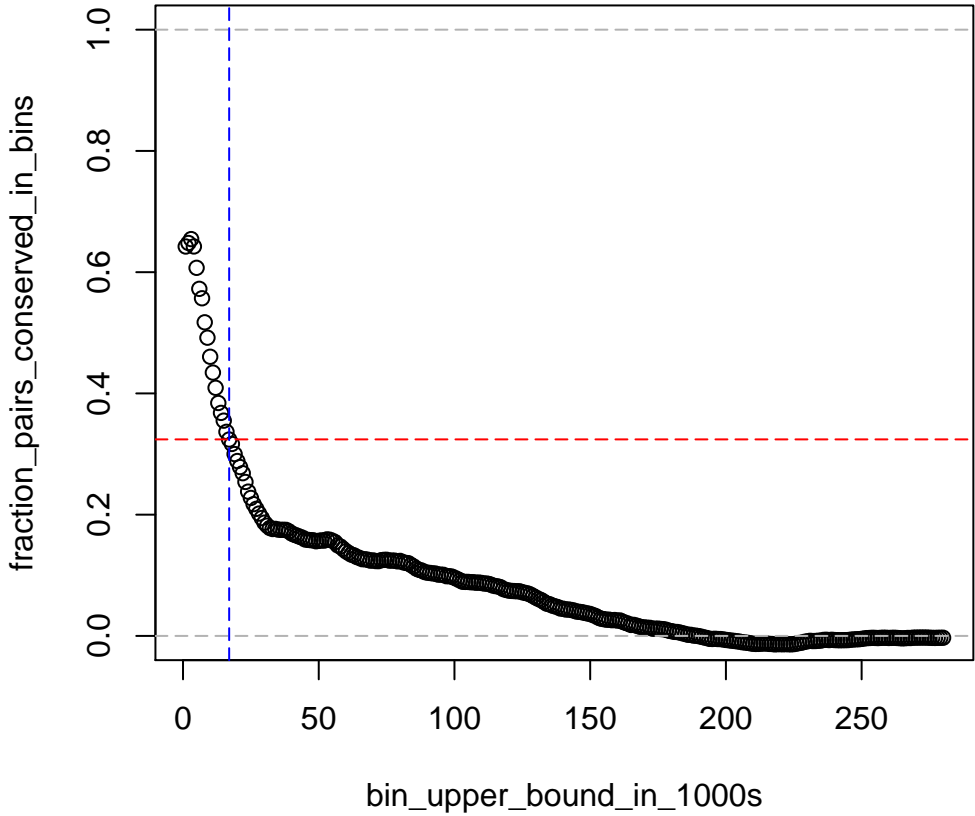

**Bin\_conservation\_minus\_bg\_IL-3A\_vs\_NE-JV-1**  
**PD-0.672978**

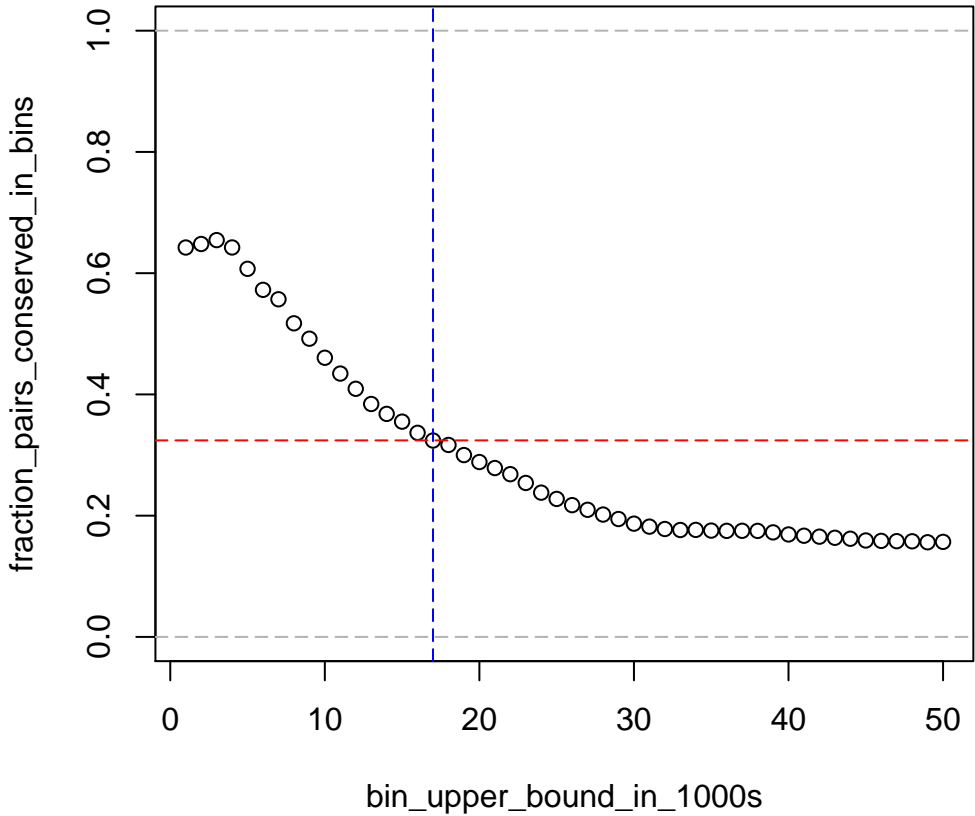

Supplement: s1 [file s1]

**Bin\_conservation\_minus\_bg\_IL-5-2s1\_vs\_MO0605SPH**  
**PD-0.706881**

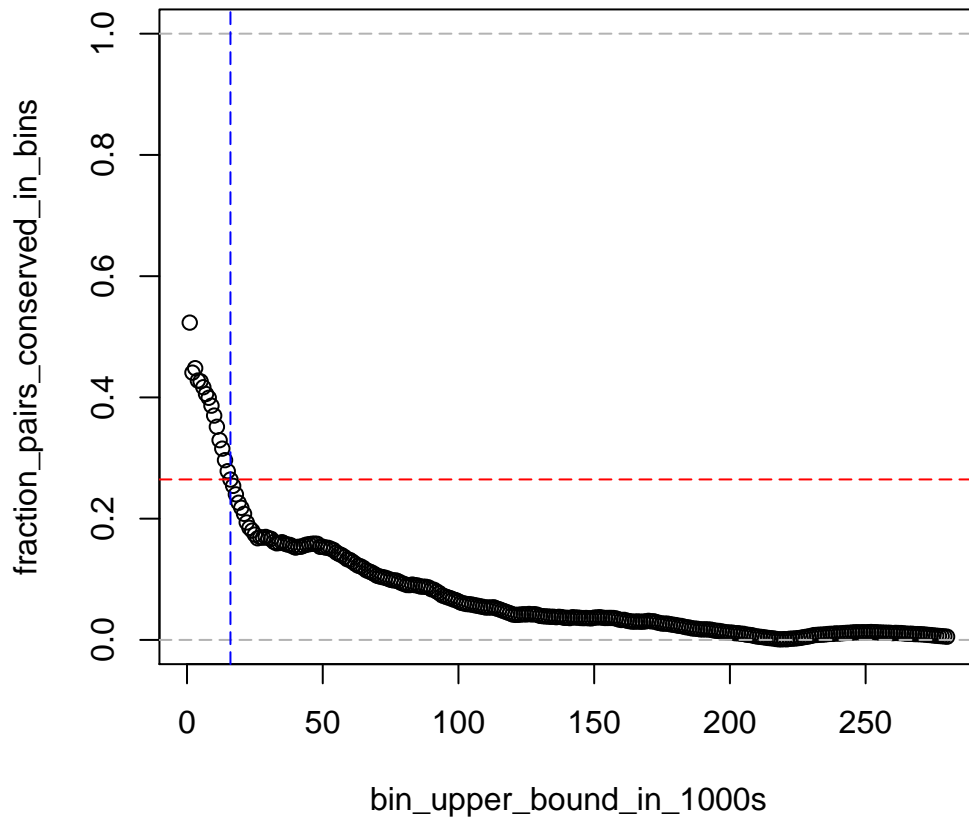

**Bin\_conservation\_minus\_bg\_IL-5-2s1\_vs\_MO0605SPH**  
**PD-0.706881**

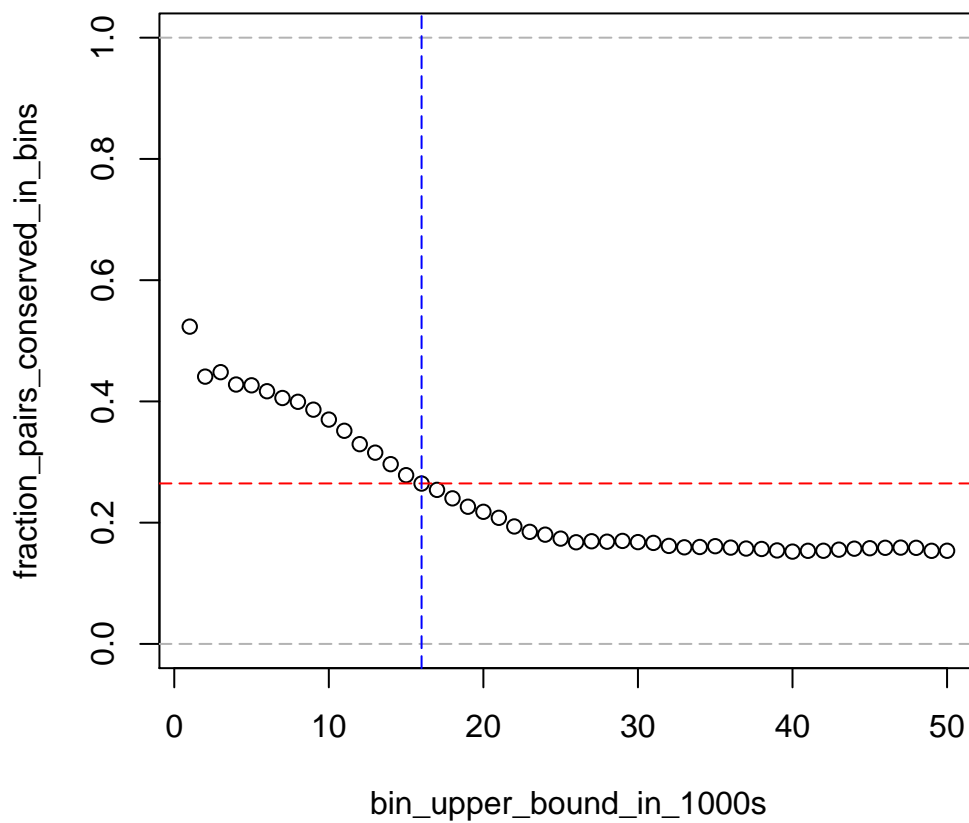

Supplement: s1 [file s1]

**Bin\_conservation\_minus\_bg\_NE-JV-2\_vs\_OR0704.2.2**  
**PD-0.459329**

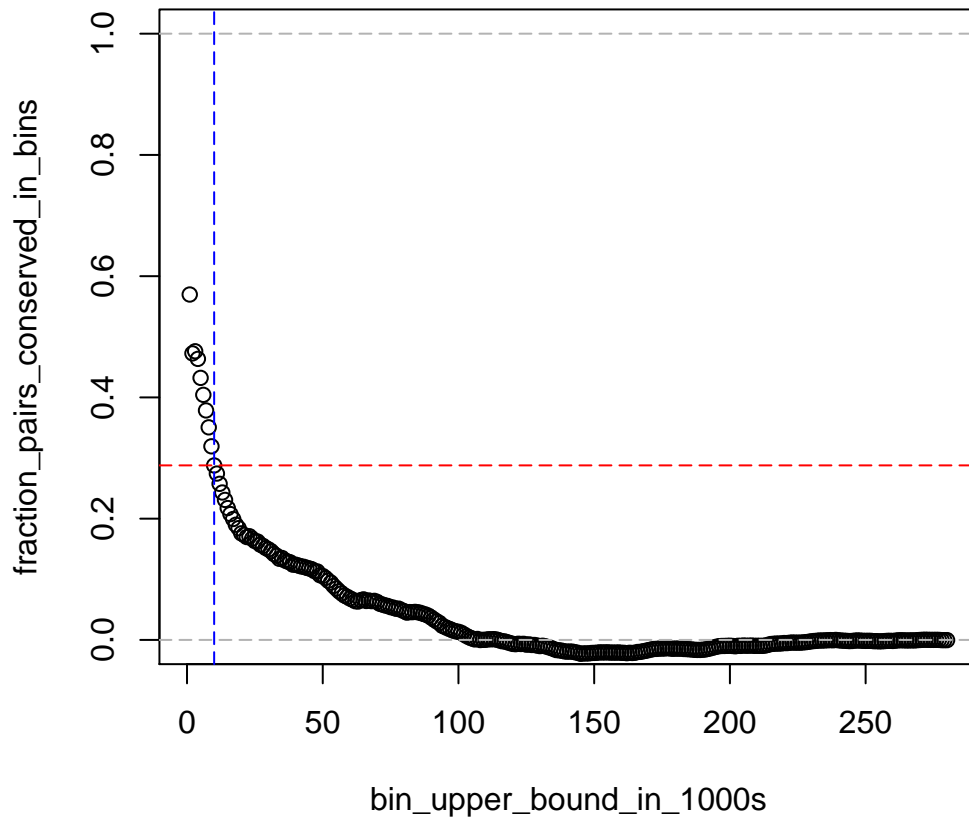

**Bin\_conservation\_minus\_bg\_NE-JV-2\_vs\_OR0704.2.2**  
**PD-0.459329**

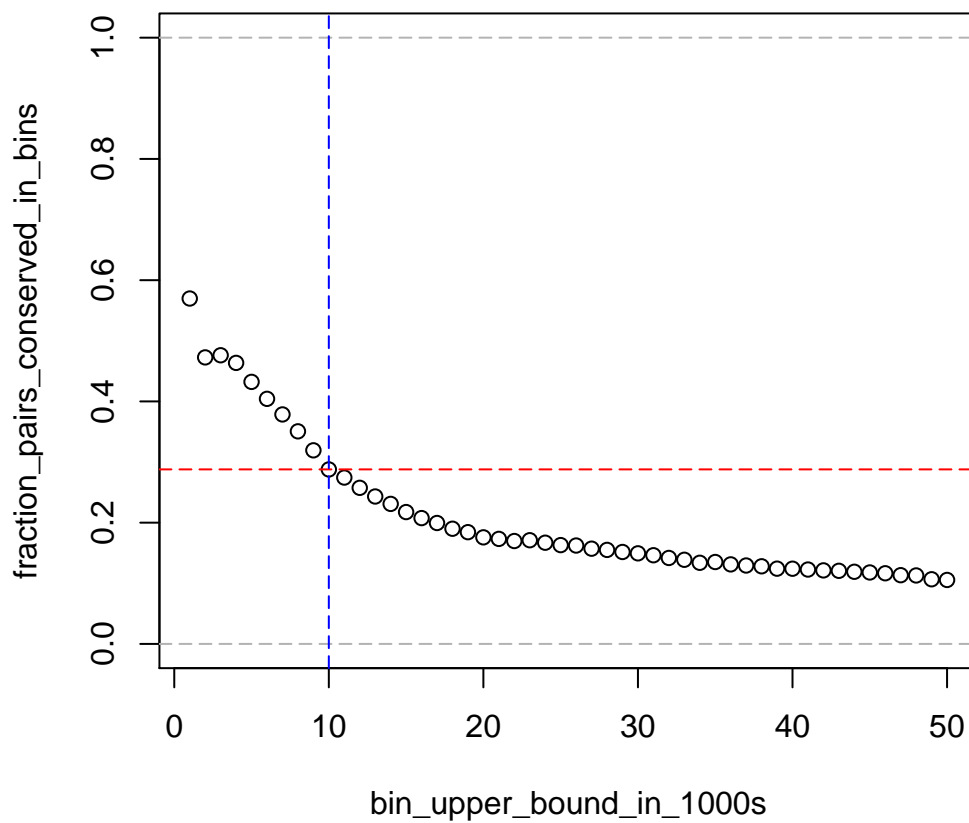

Supplement: s1 [file s1]

**Bin\_conservation\_minus\_bg\_AR158\_vs\_NE-JV-4**  
**PD-0.137753**

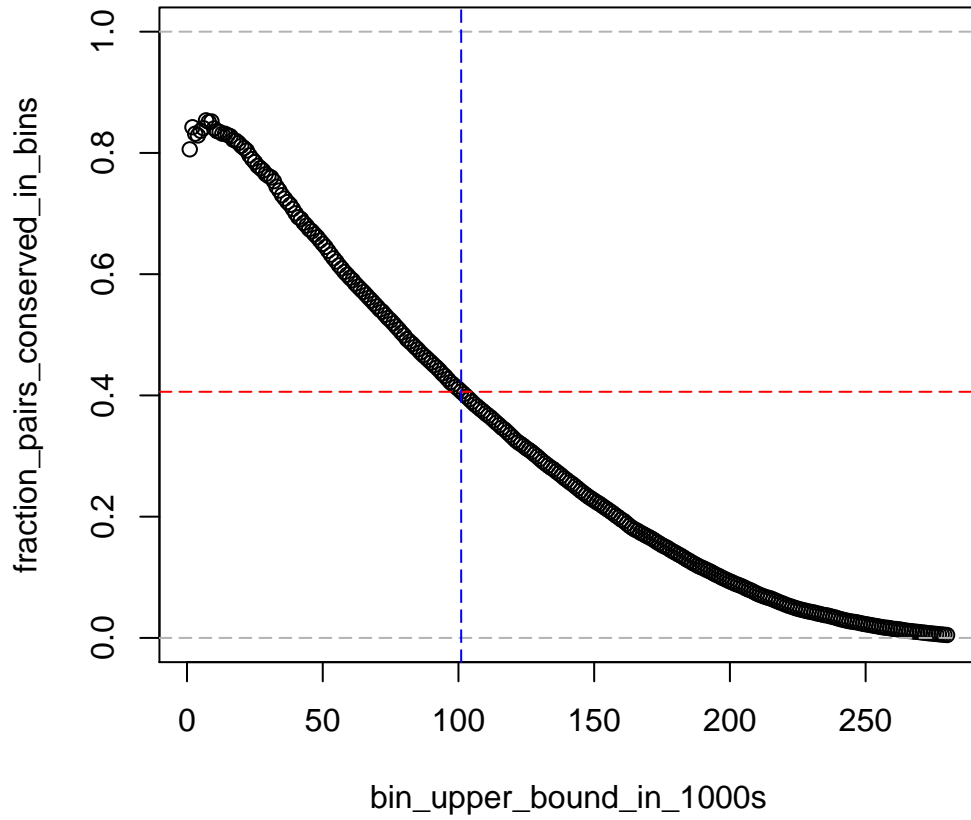

**Bin\_conservation\_minus\_bg\_AR158\_vs\_NE-JV-4**  
**PD-0.137753**

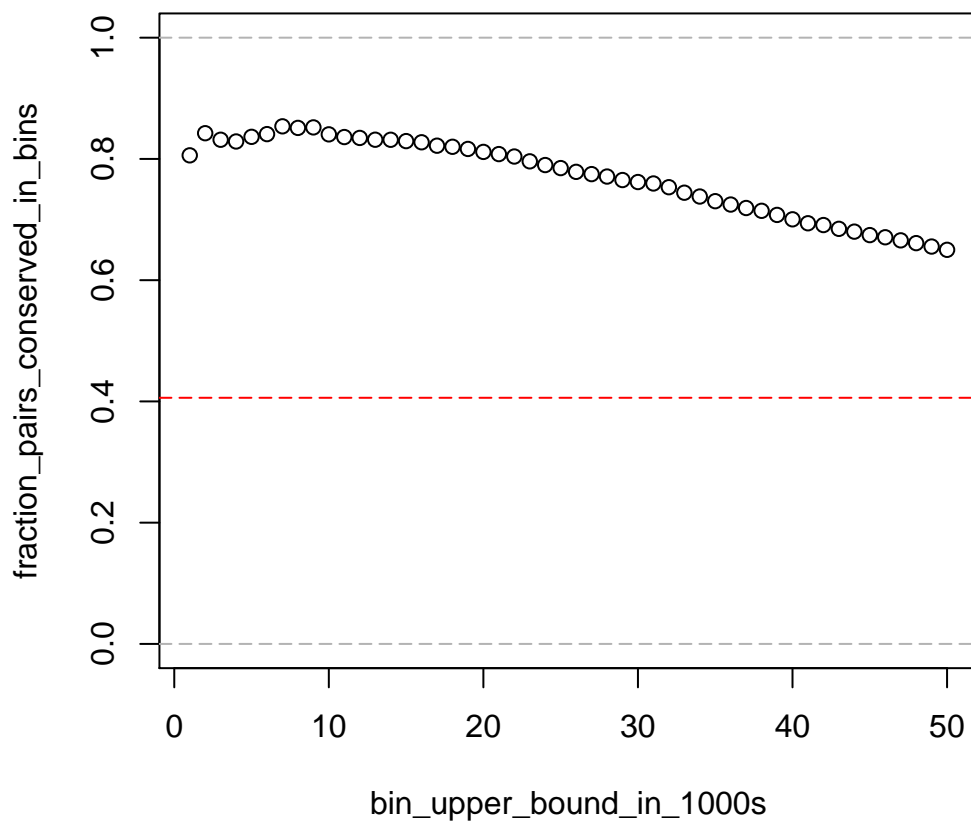

Supplement: s1 [file s1]

**Bin\_conservation\_minus\_bg\_NE-JV-1\_vs\_NE-JV-2**  
**PD-0.493827**

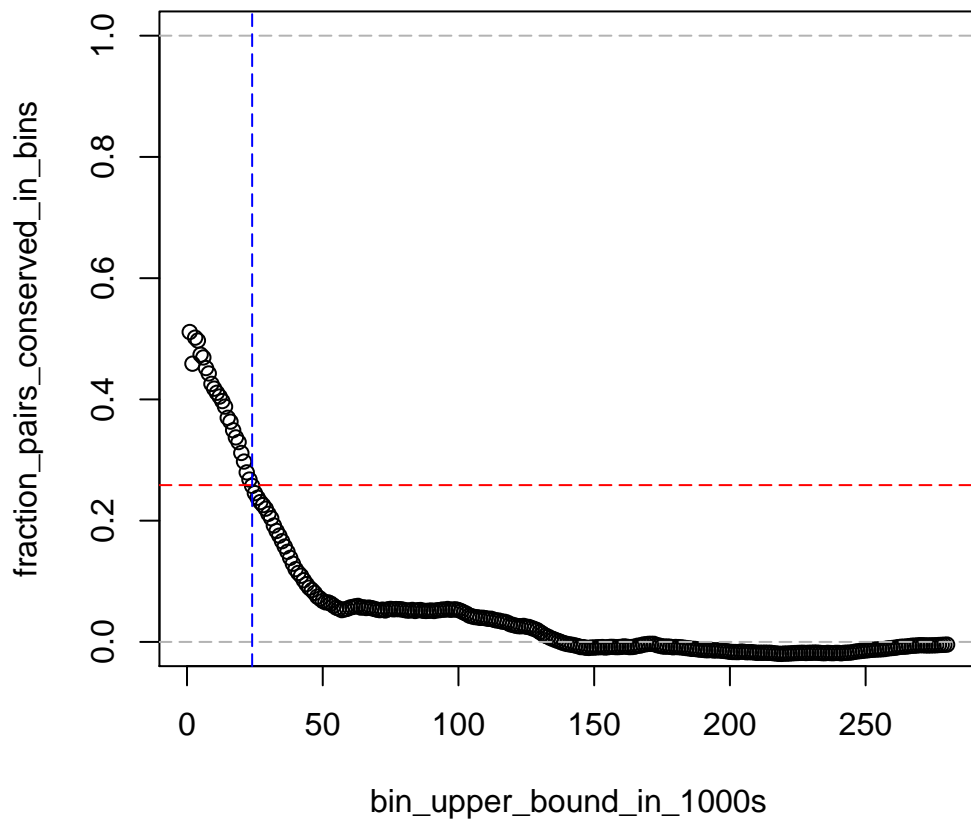

**Bin\_conservation\_minus\_bg\_NE-JV-1\_vs\_NE-JV-2**  
**PD-0.493827**

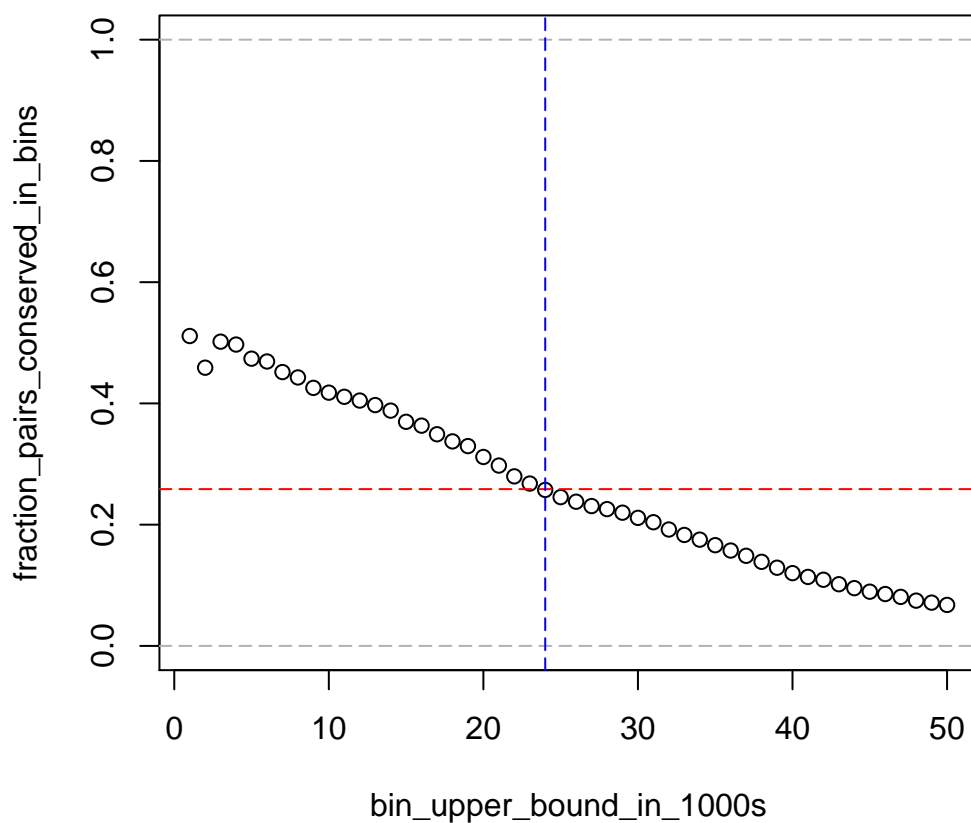

Supplement: s1 [file s1]

**Bin\_conservation\_minus\_bg\_CVM-1\_vs\_NE-JV-3**  
**PD-0.459968**

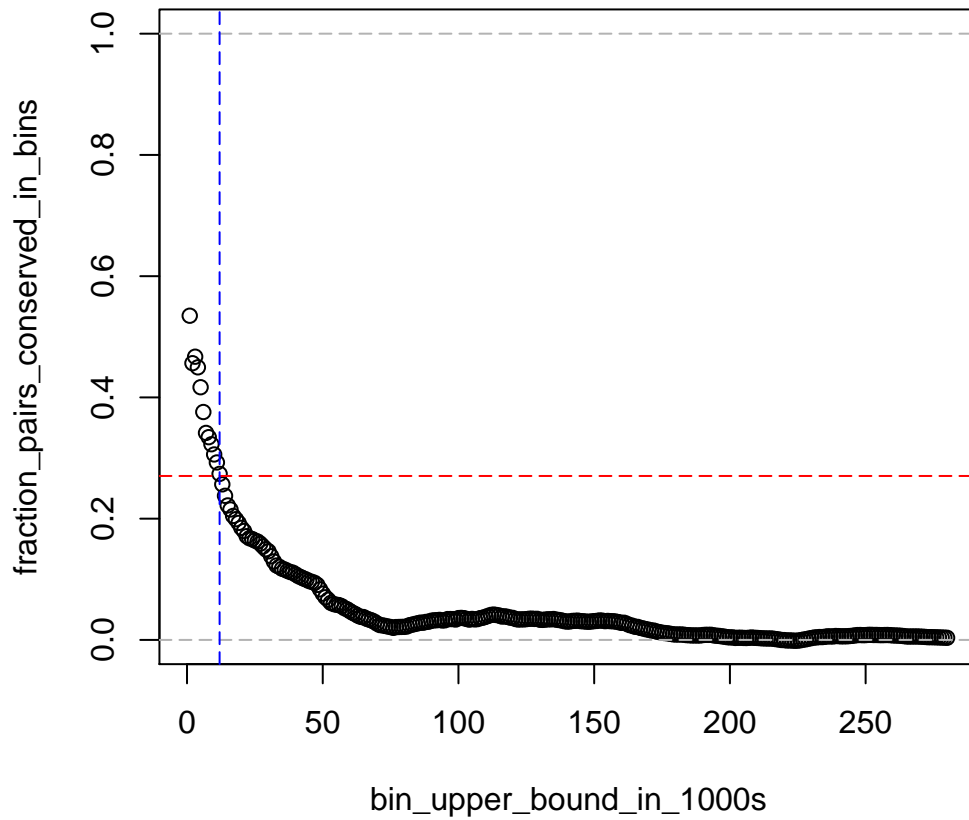

**Bin\_conservation\_minus\_bg\_CVM-1\_vs\_NE-JV-3**  
**PD-0.459968**

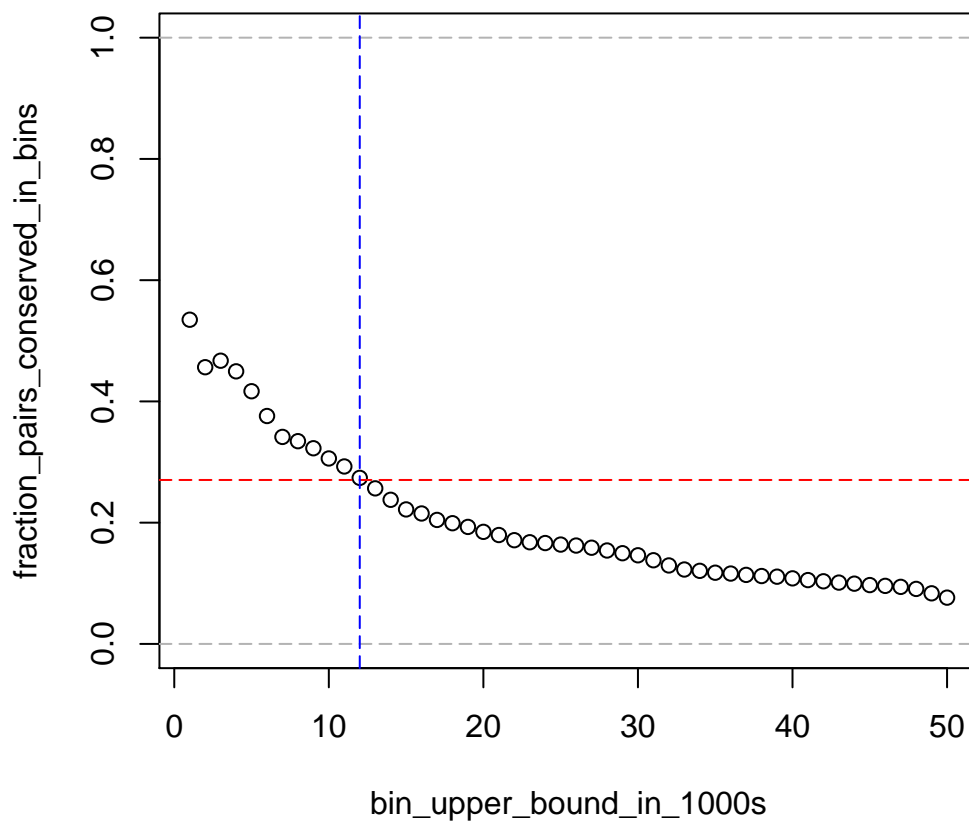

Supplement: s1 [file s1]

**Bin\_conservation\_minus\_bg\_CVM-1\_vs\_WI0606**  
**PD-0.463403**

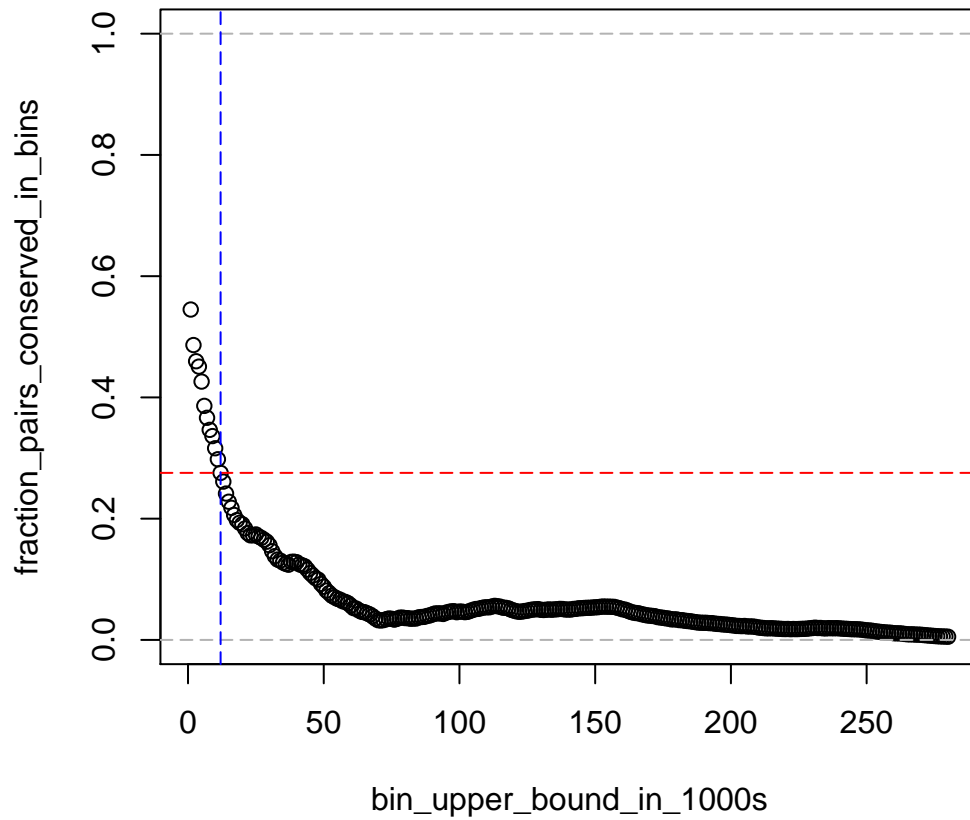

**Bin\_conservation\_minus\_bg\_CVM-1\_vs\_WI0606**  
**PD-0.463403**

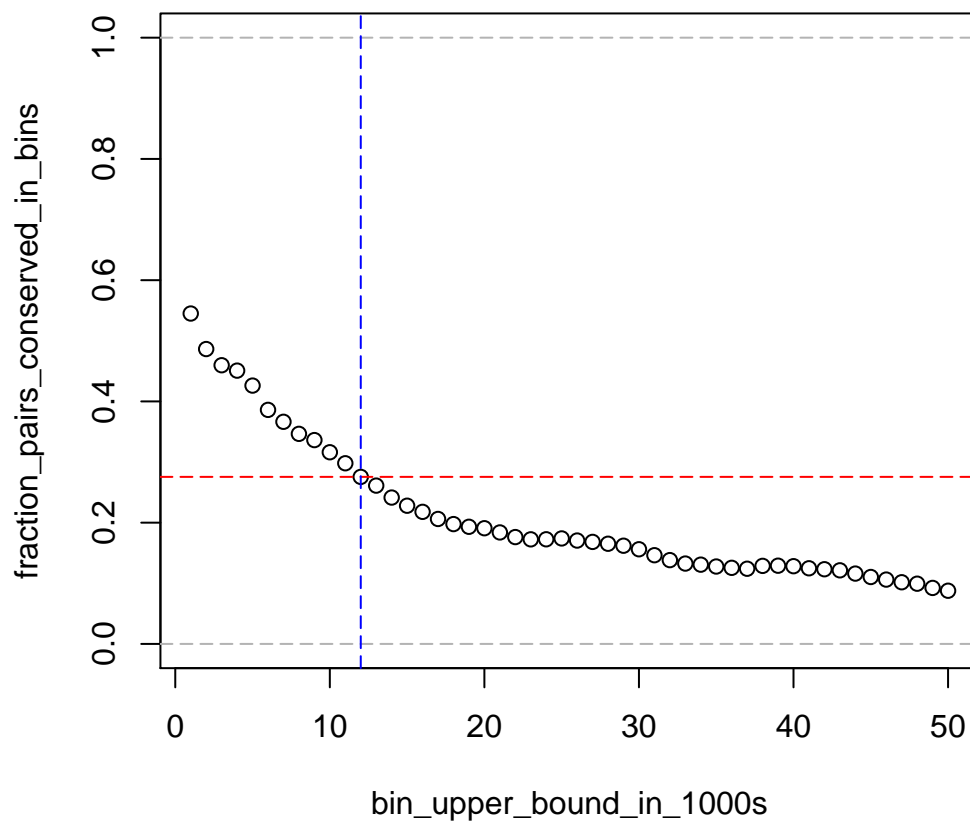

Supplement: s1 [file s1]

**Bin\_conservation\_minus\_bg\_MO0605SPH\_vs\_NY-2B**  
**PD-0.708872**

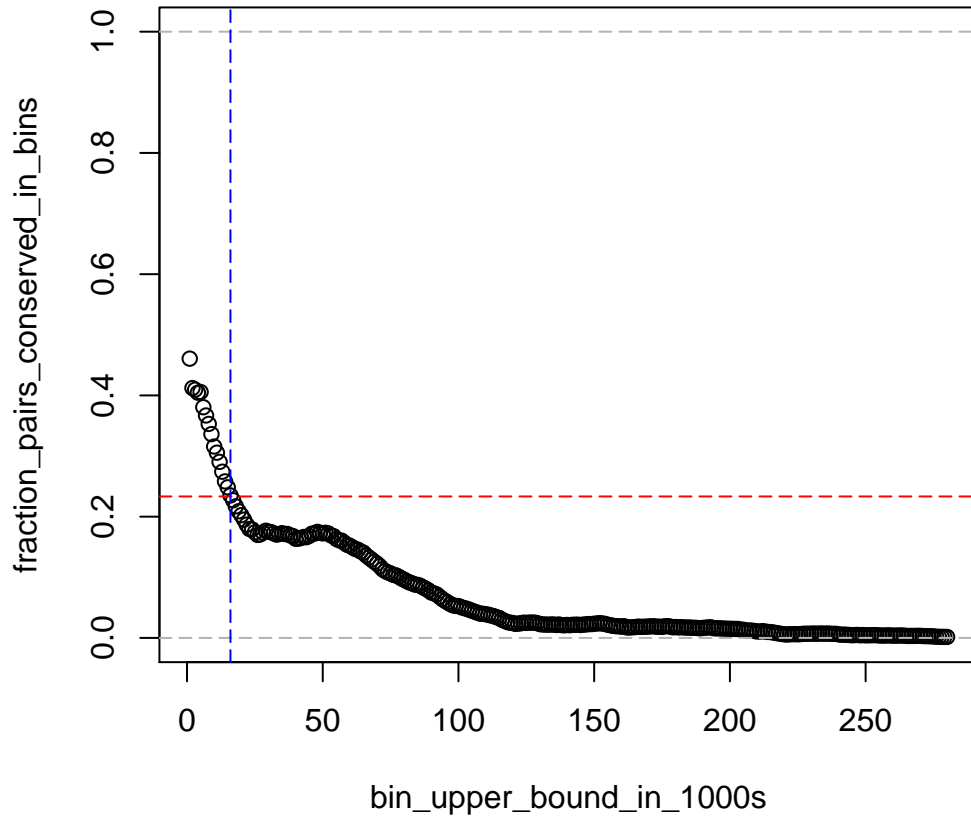

**Bin\_conservation\_minus\_bg\_MO0605SPH\_vs\_NY-2B**  
**PD-0.708872**

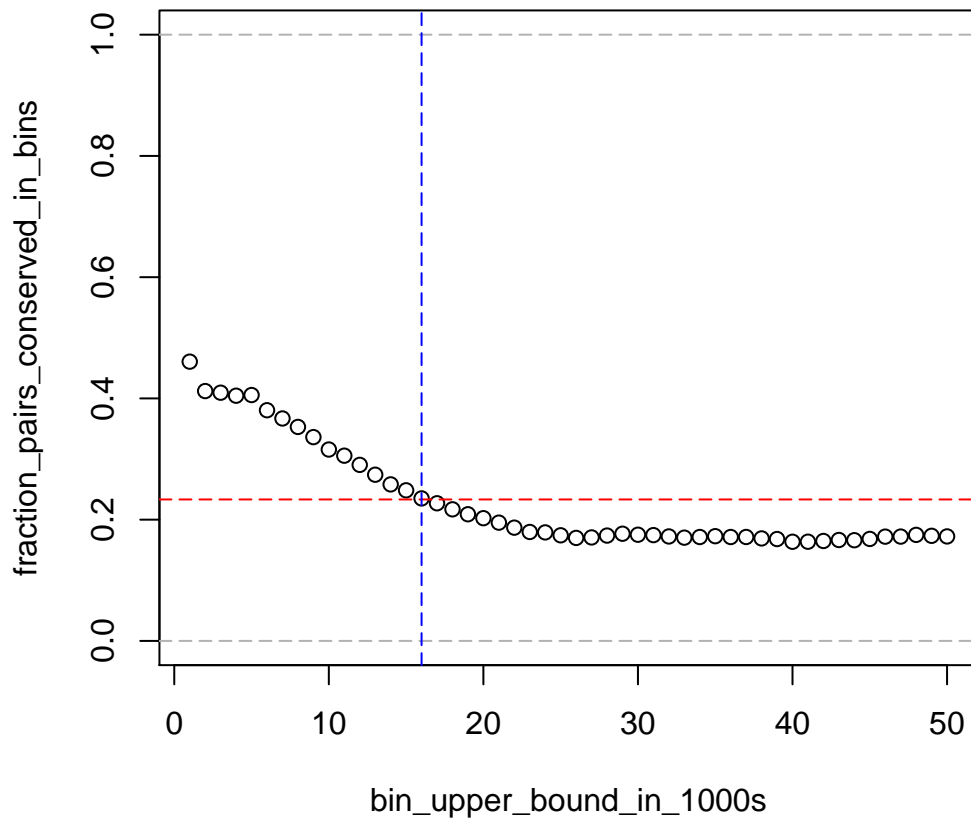

Supplement: s1 [file s1]

**Bin\_conservation\_minus\_bg\_Can0610SP\_vs\_CviKI**  
**PD-0.693815**

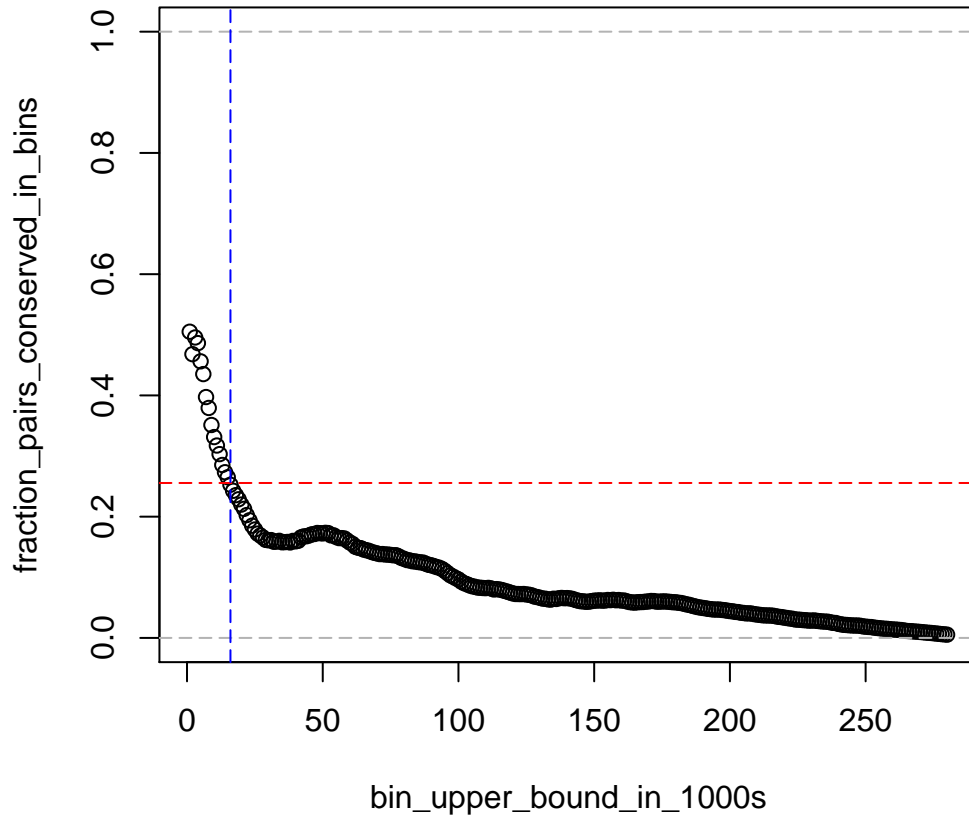

**Bin\_conservation\_minus\_bg\_Can0610SP\_vs\_CviKI**  
**PD-0.693815**

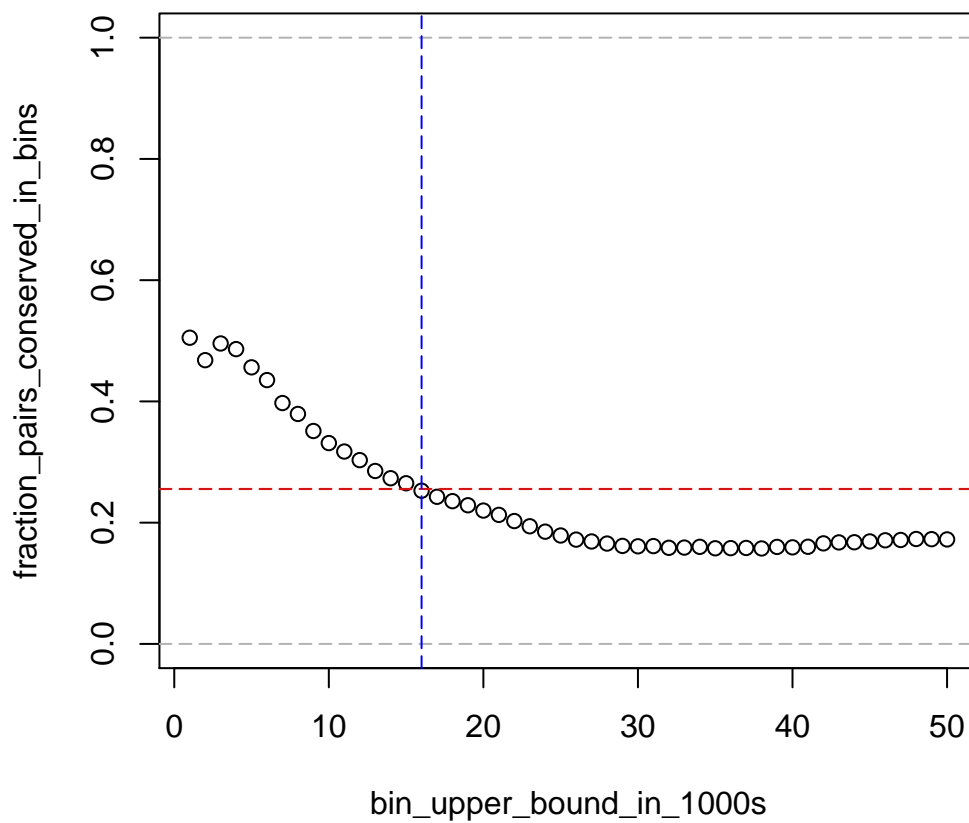

Supplement: s1 [file s1]

**Bin\_conservation\_minus\_bg\_CVG-1\_vs\_NE-JV-2**  
**PD-0.461781**

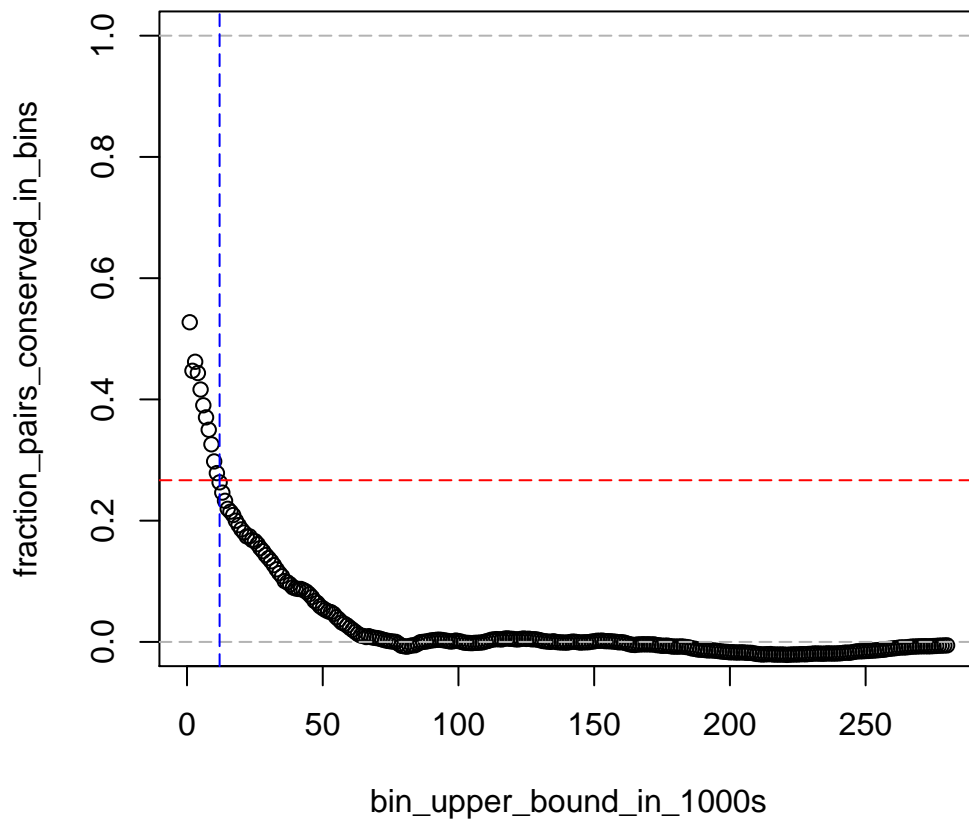

**Bin\_conservation\_minus\_bg\_CVG-1\_vs\_NE-JV-2**  
**PD-0.461781**

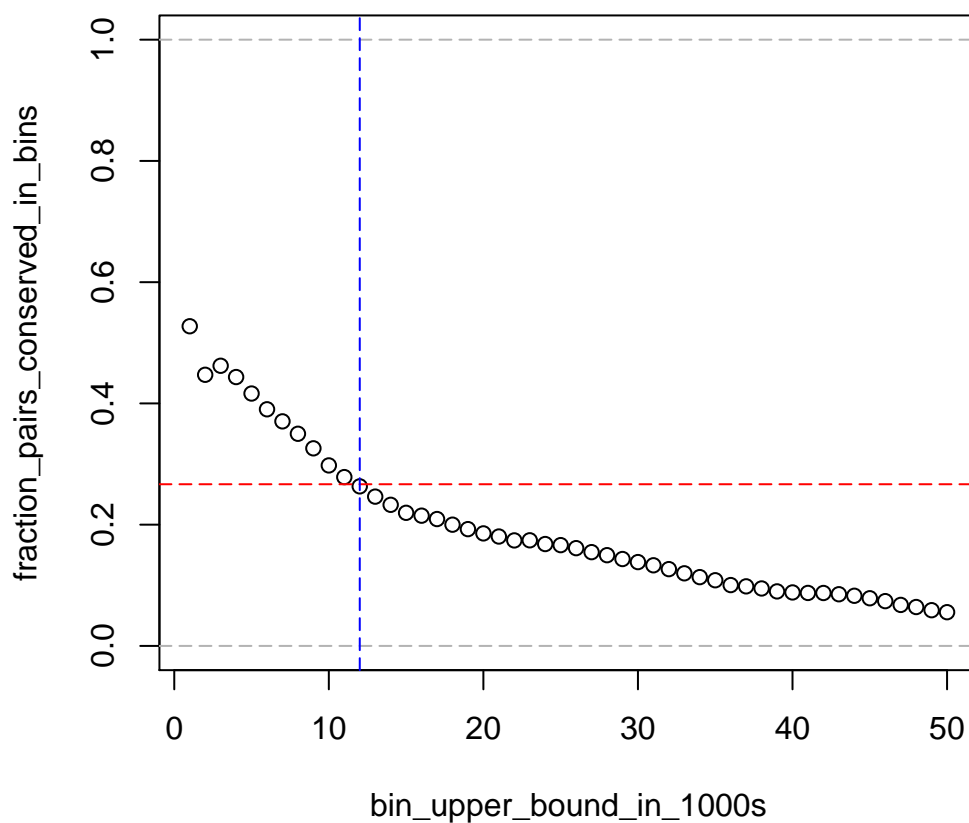

Supplement: s1 [file s1]

**Bin\_conservation\_minus\_bg\_MT325\_vs\_OR0704.2.2**  
**PD-0.03499**

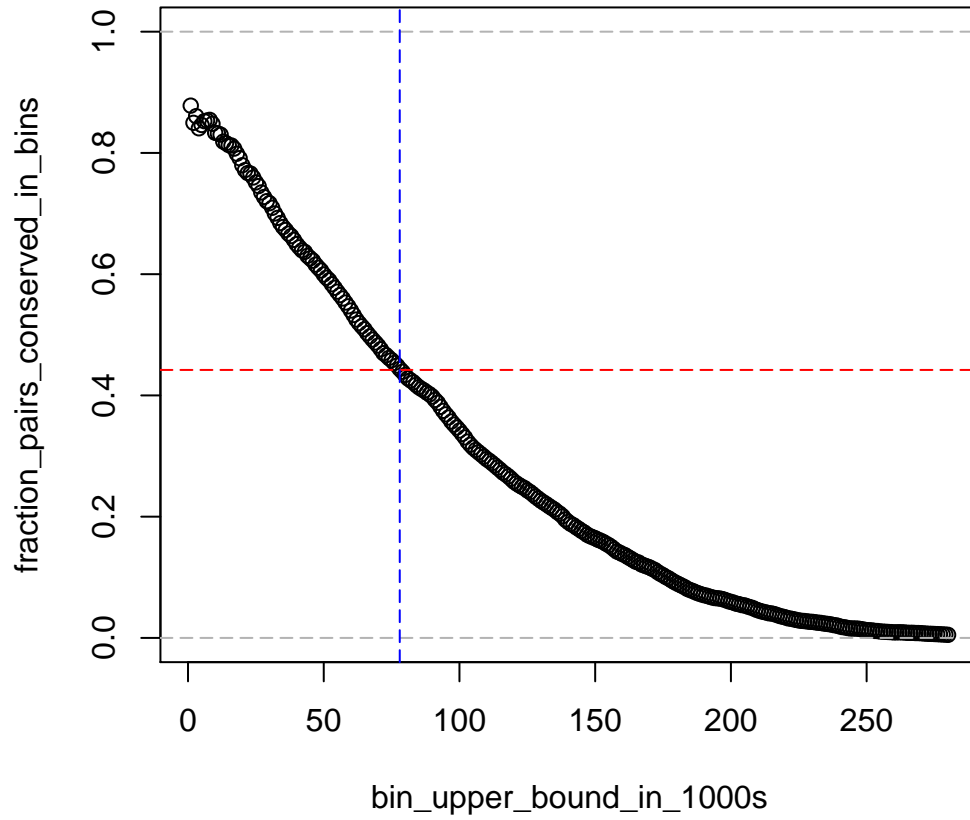

**Bin\_conservation\_minus\_bg\_MT325\_vs\_OR0704.2.2**  
**PD-0.03499**

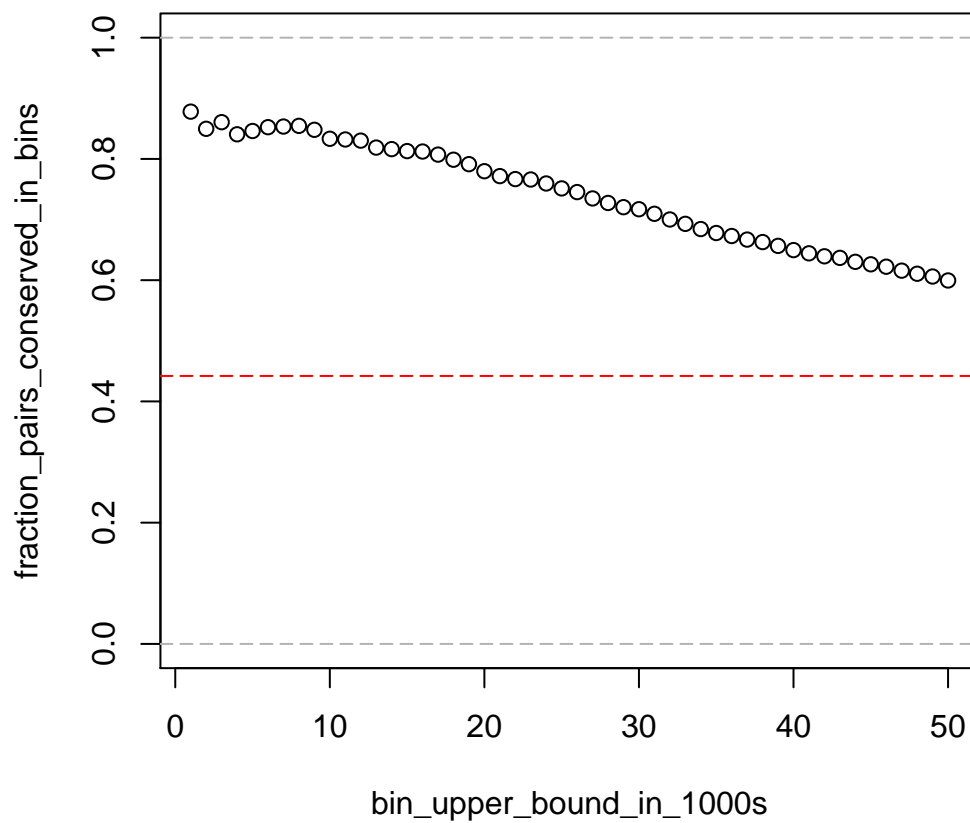

Supplement: s1 [file s1]

**Bin\_conservation\_minus\_bg\_Fr5L\_vs\_WI0606**  
**PD-0.463239**

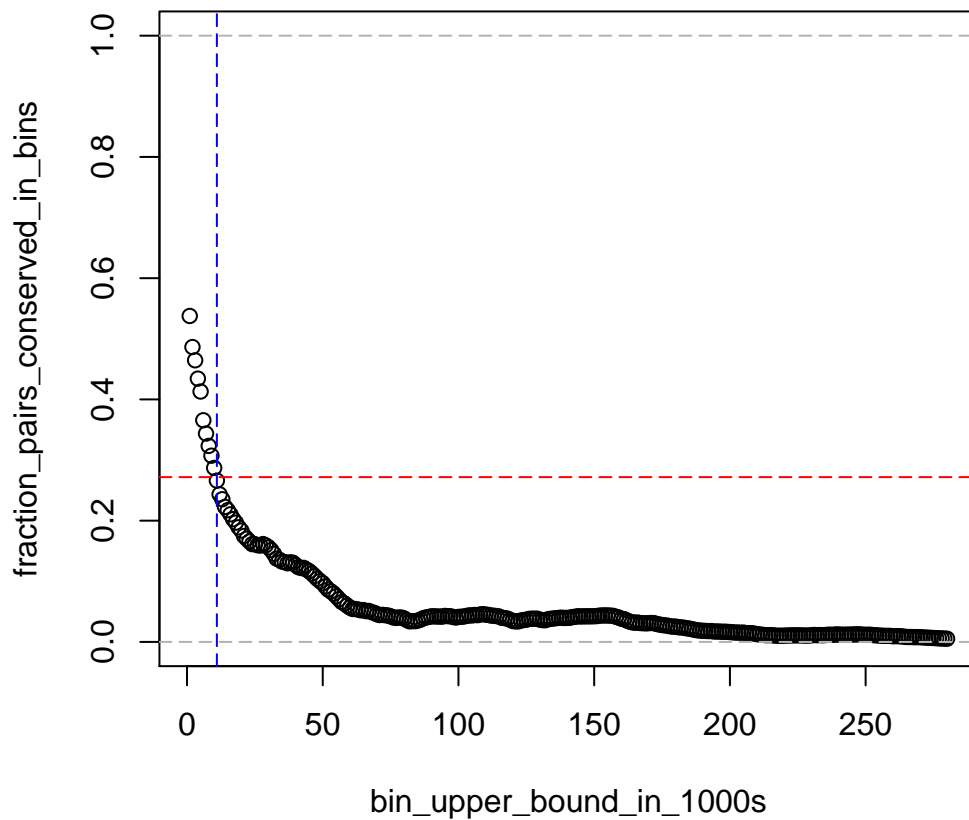

**Bin\_conservation\_minus\_bg\_Fr5L\_vs\_WI0606**  
**PD-0.463239**

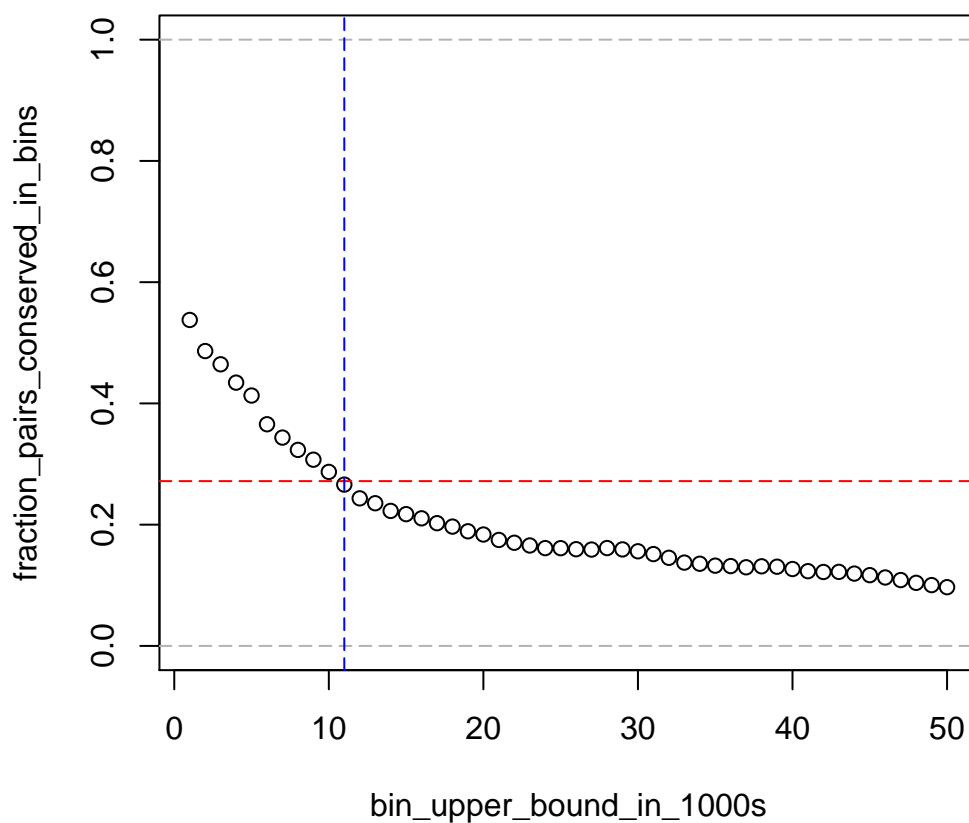

Supplement: s1 [file s1]

**Bin\_conservation\_minus\_bg\_CVB-1\_vs\_PBCV1**  
**PD-0.650546**

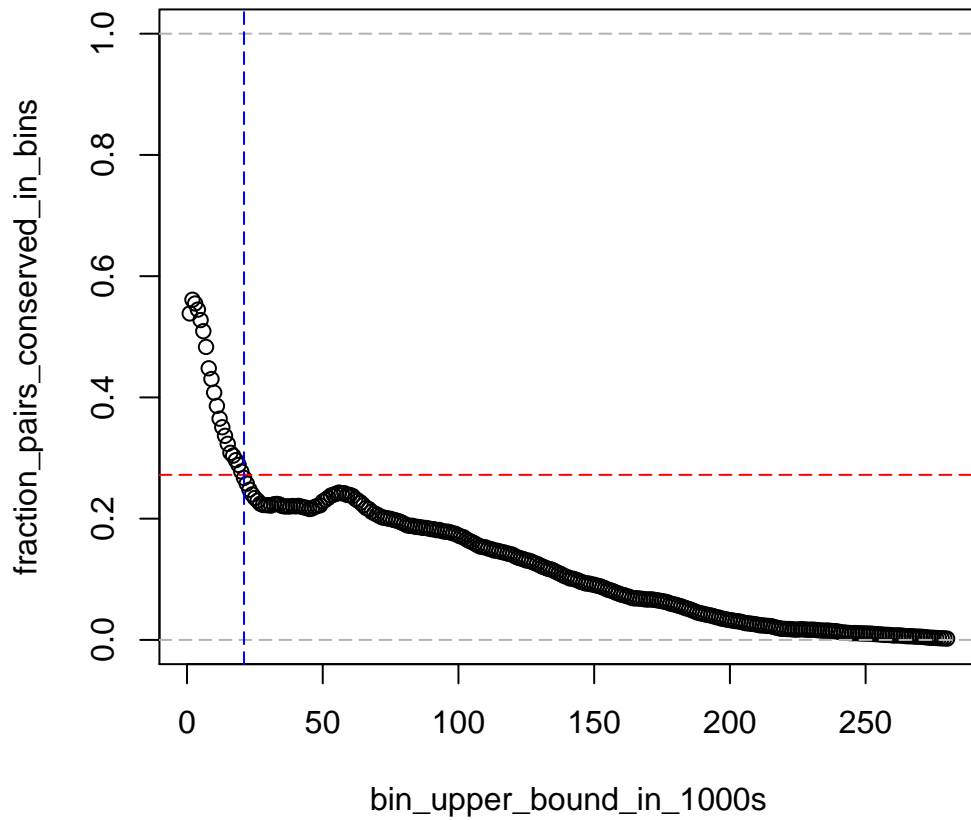

**Bin\_conservation\_minus\_bg\_CVB-1\_vs\_PBCV1**  
**PD-0.650546**

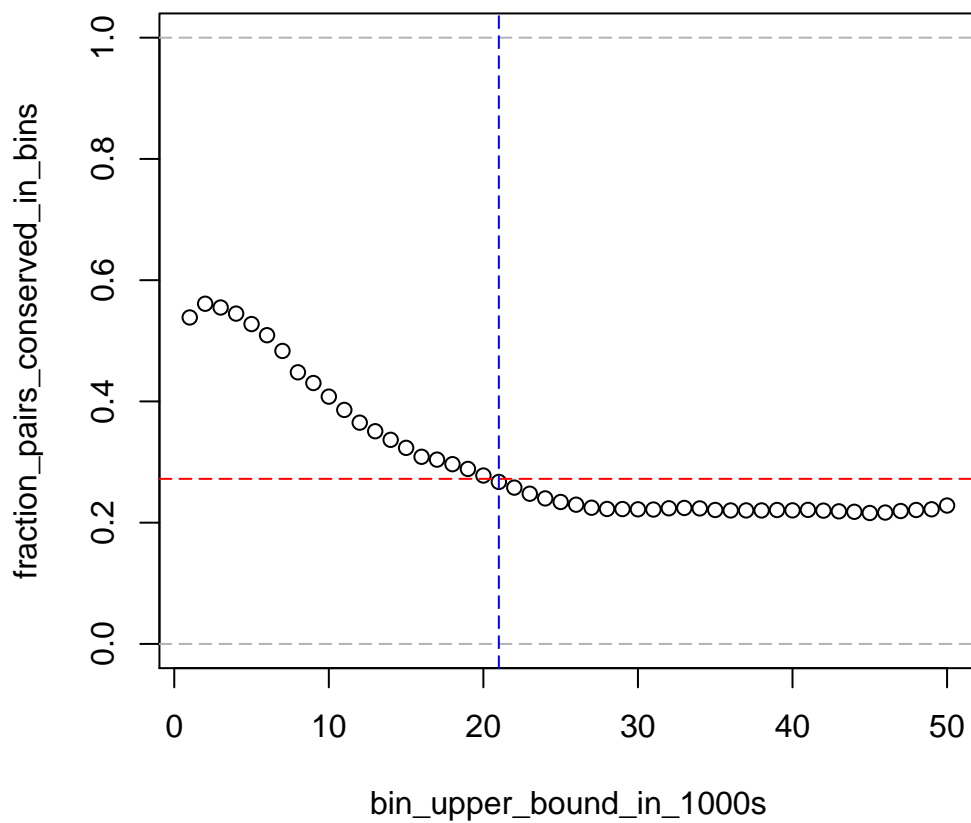

Supplement: s1 [file s1]

**Bin\_conservation\_minus\_bg\_CVM-1\_vs\_KS1B**  
**PD-0.650674**

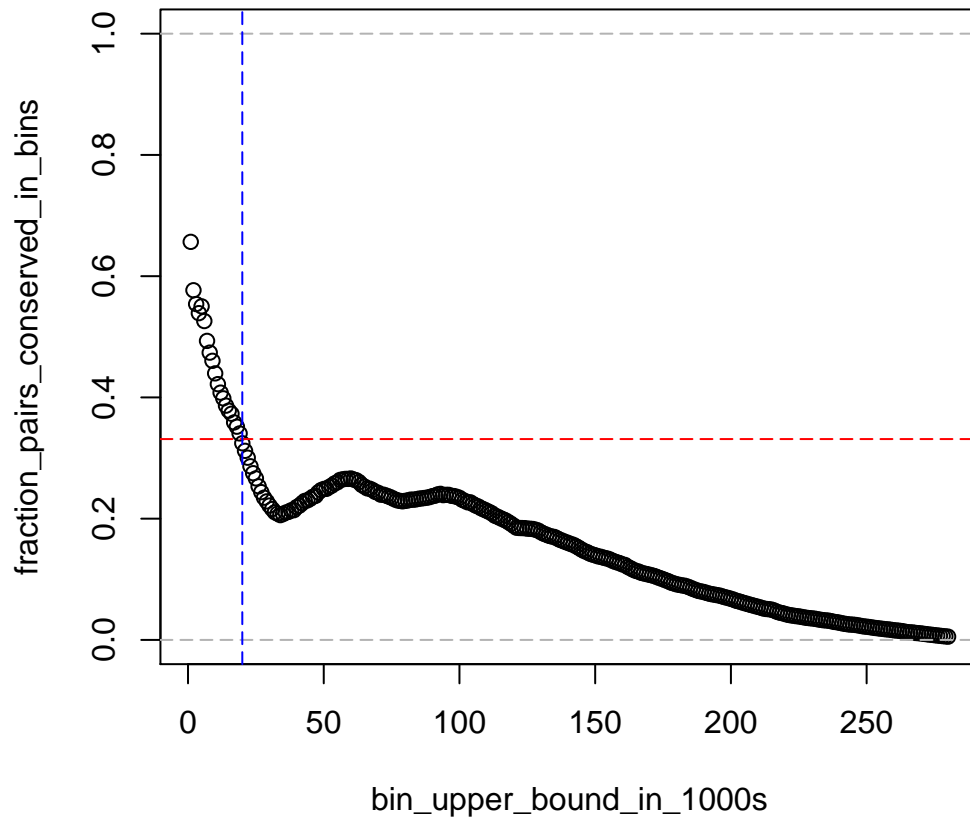

**Bin\_conservation\_minus\_bg\_CVM-1\_vs\_KS1B**  
**PD-0.650674**

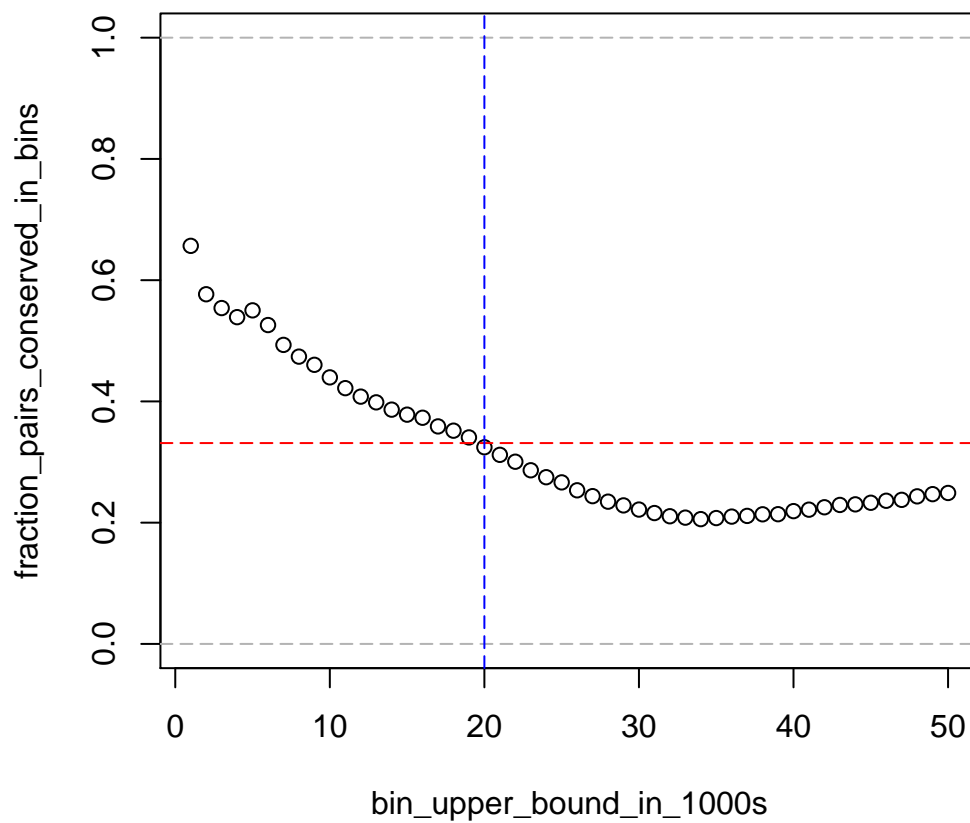

Supplement: s1 [file s1]

**Bin\_conservation\_minus\_bg\_ATCV1\_vs\_GM0701.1**  
**PD-0.061173**

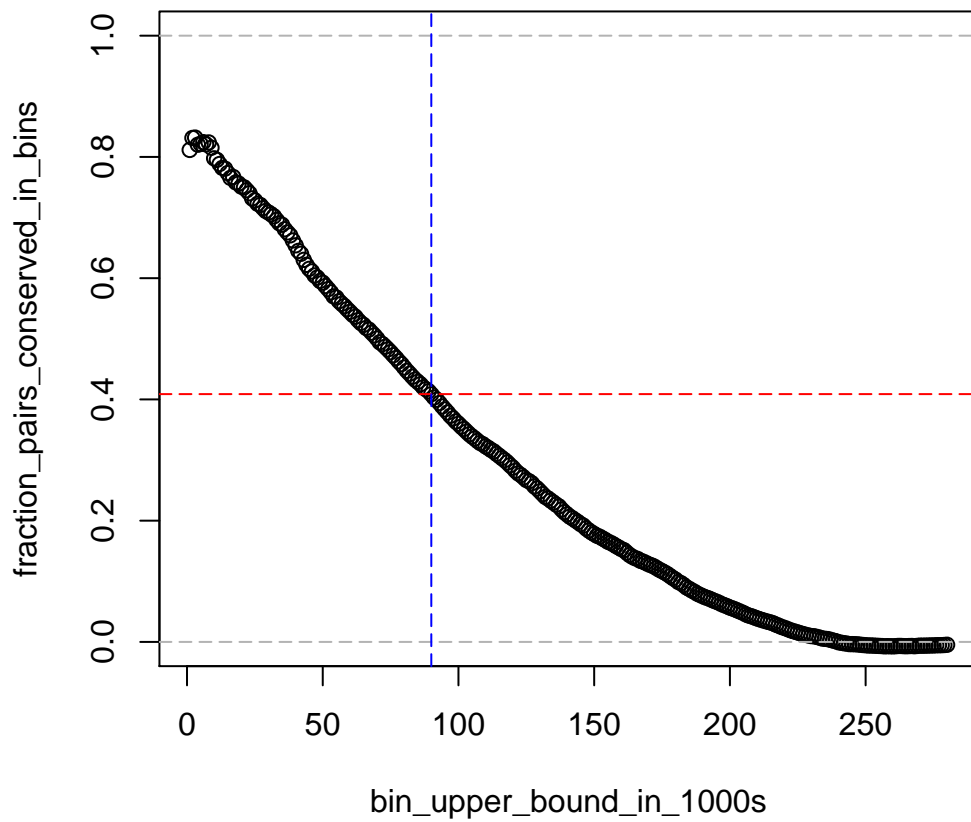

**Bin\_conservation\_minus\_bg\_ATCV1\_vs\_GM0701.1**  
**PD-0.061173**

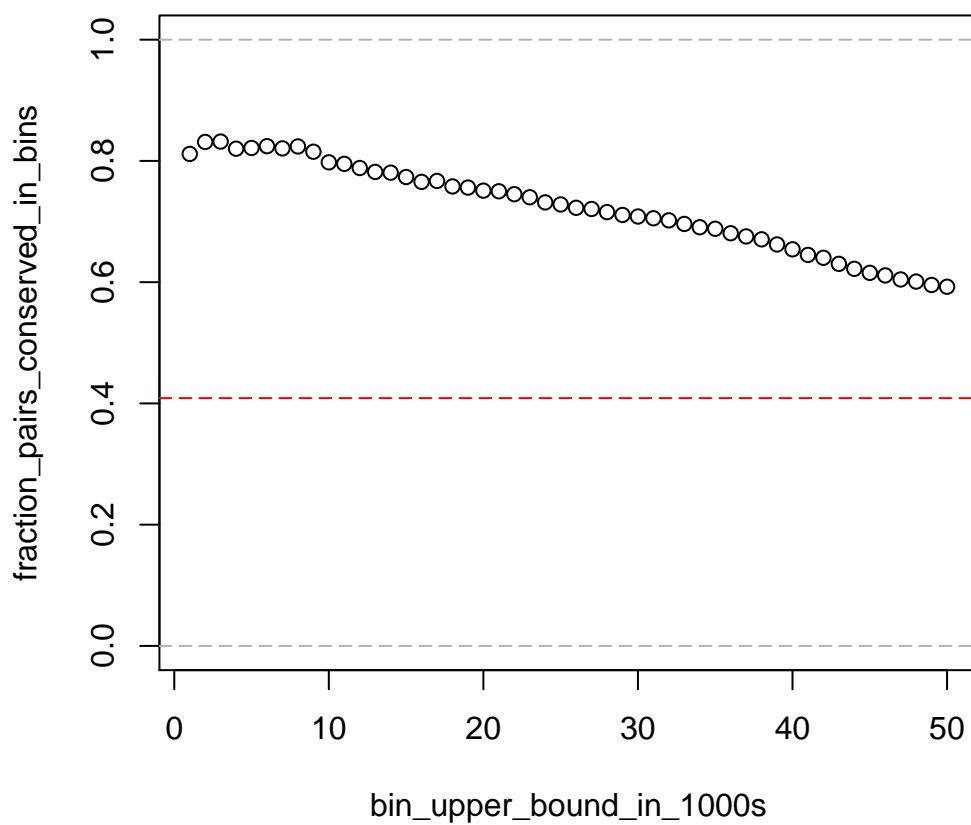

Supplement: s1 [file s1]

**Bin\_conservation\_minus\_bg\_CVM-1\_vs\_CVR-1**  
**PD-0.009417**

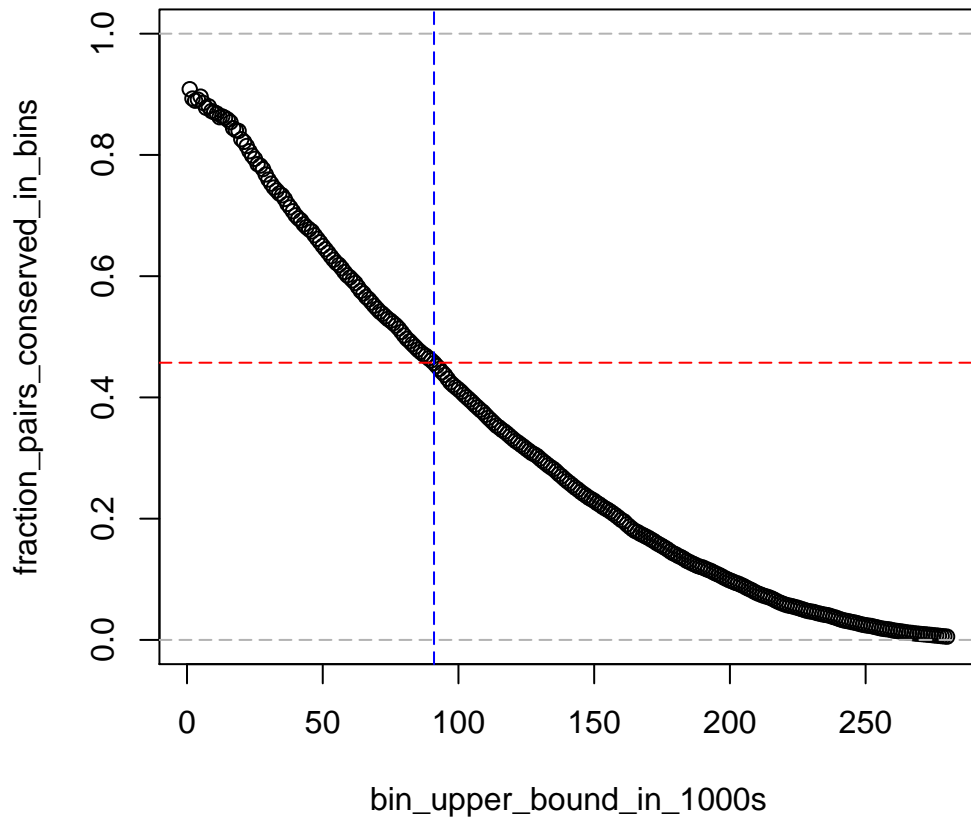

**Bin\_conservation\_minus\_bg\_CVM-1\_vs\_CVR-1**  
**PD-0.009417**

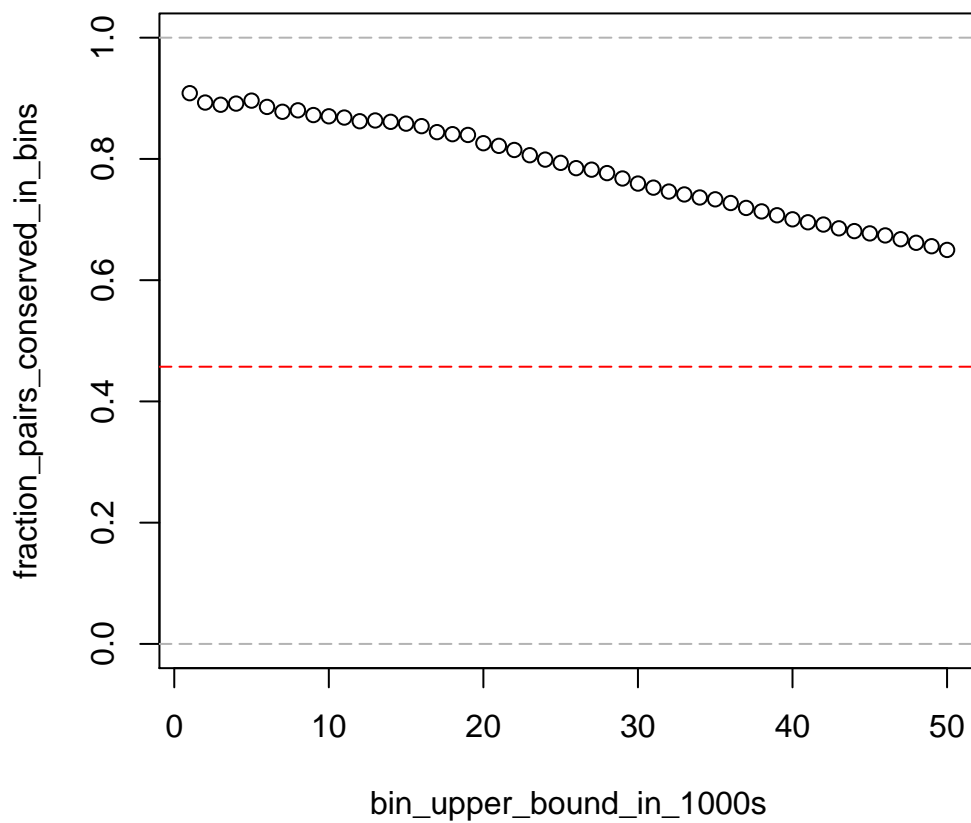

Supplement: s1 [file s1]

**Bin\_conservation\_minus\_bg\_ATCV1\_vs\_NW665.2**  
**PD-0.46258**

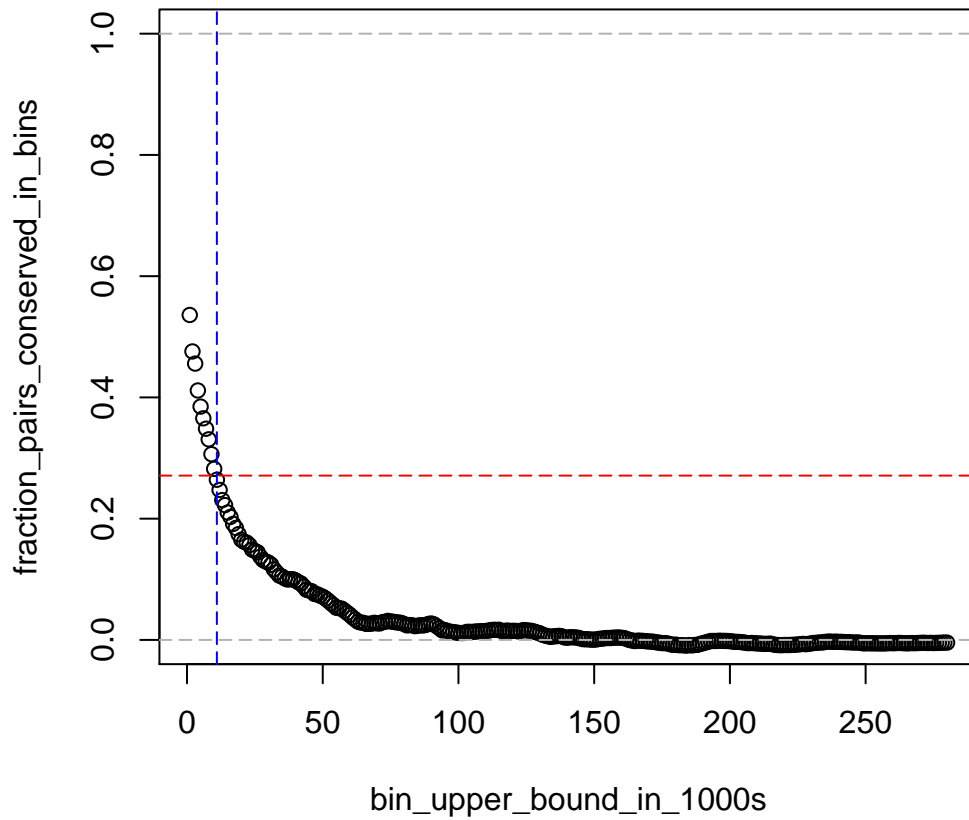

**Bin\_conservation\_minus\_bg\_ATCV1\_vs\_NW665.2**  
**PD-0.46258**

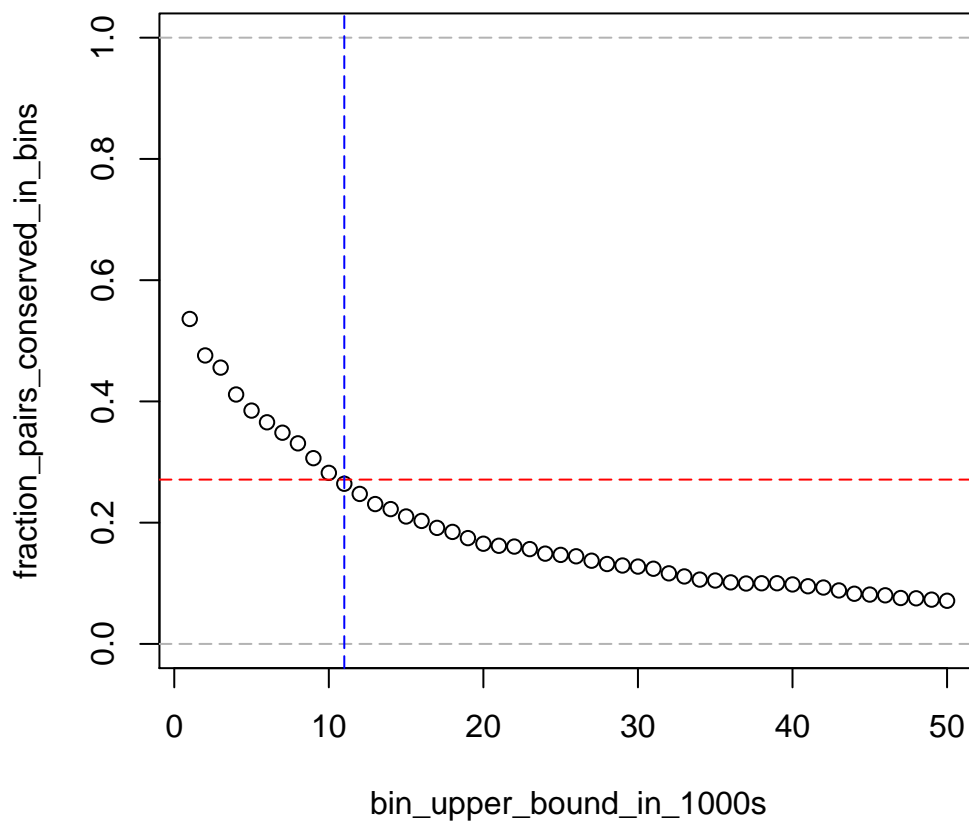

Supplement: s1 [file s1]

**Bin\_conservation\_minus\_bg\_IL-3A\_vs\_NE-JV-3**  
**PD-0.681772**

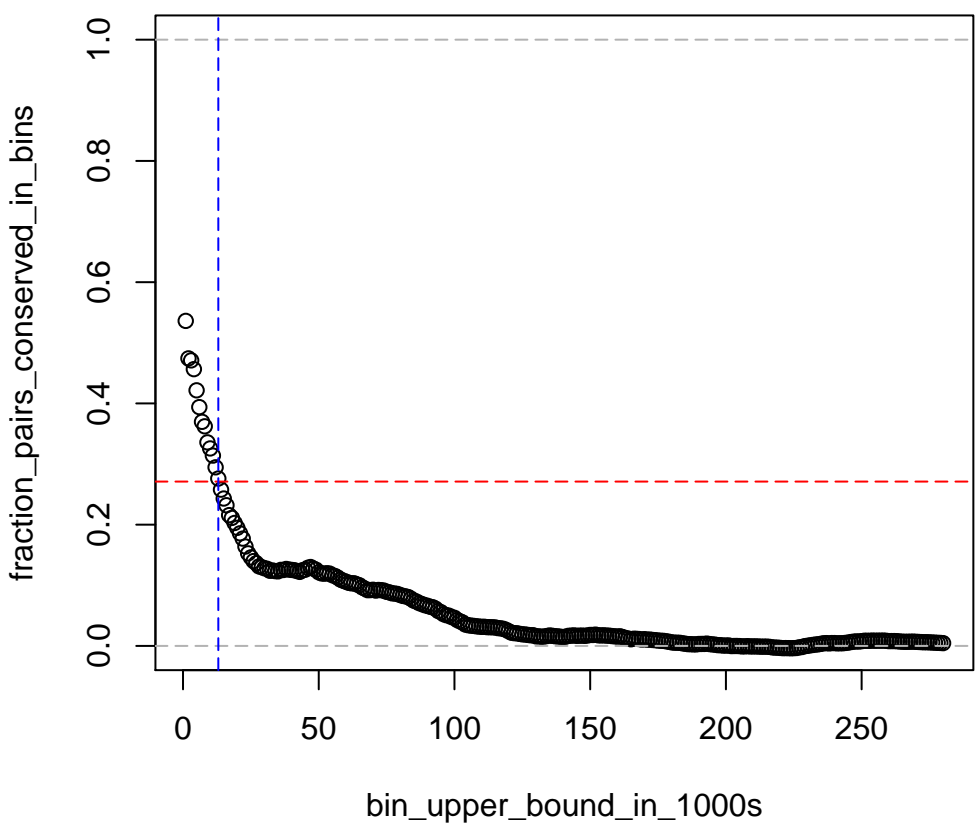

**Bin\_conservation\_minus\_bg\_IL-3A\_vs\_NE-JV-3**  
**PD-0.681772**

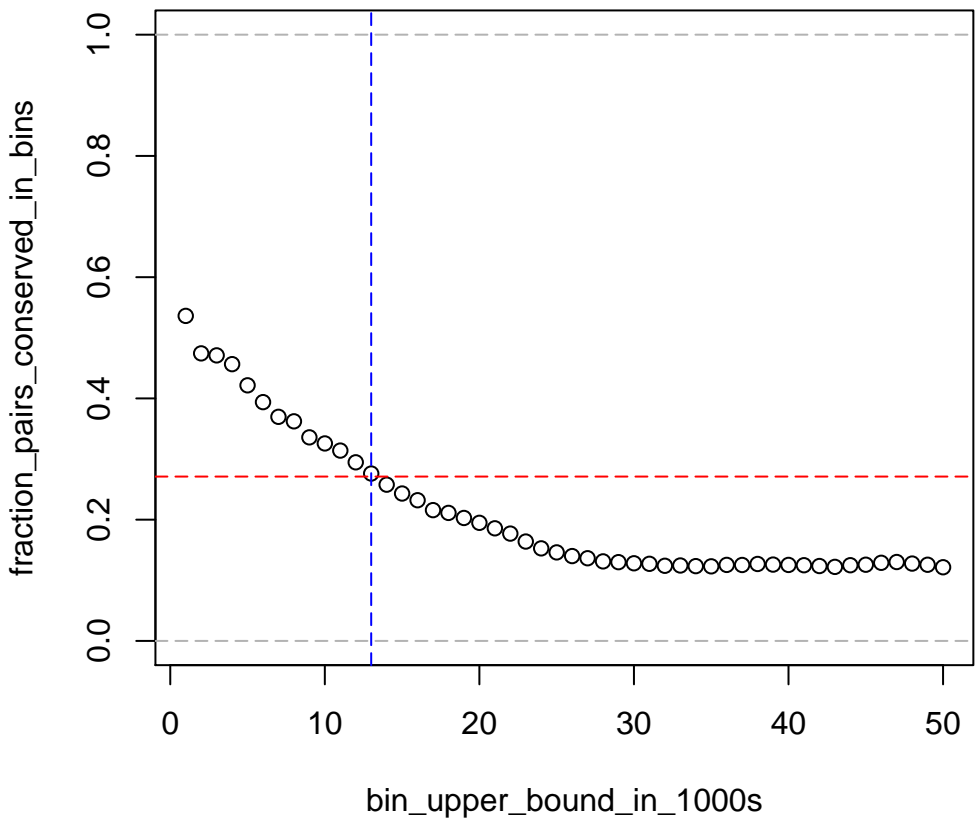

Supplement: s1 [file s1]

**Bin\_conservation\_minus\_bg\_AP110A\_vs\_CZ-2**  
**PD-0.044159**

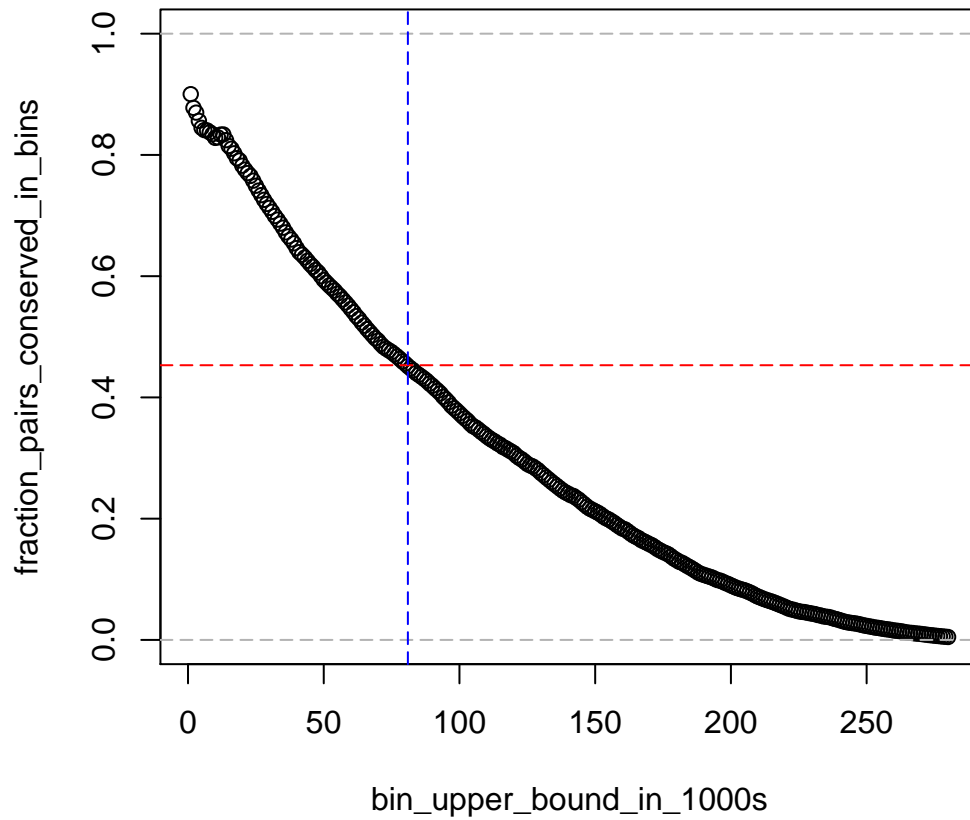

**Bin\_conservation\_minus\_bg\_AP110A\_vs\_CZ-2**  
**PD-0.044159**

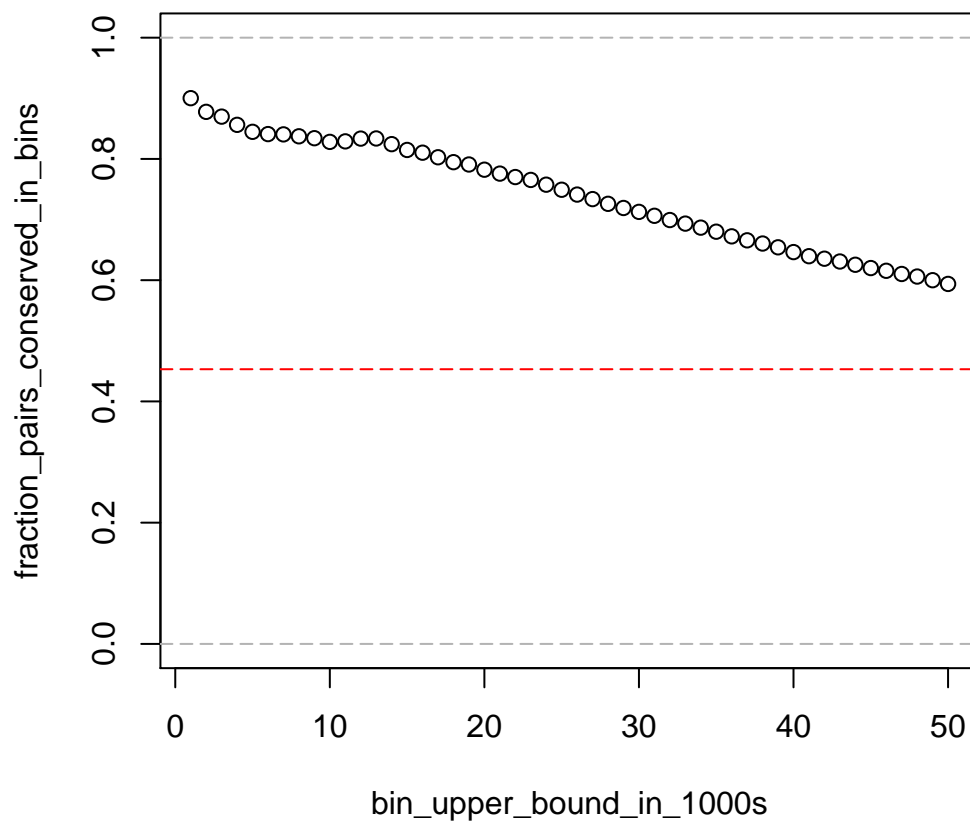

Supplement: s1 [file s1]

**Bin\_conservation\_minus\_bg\_CVG-1\_vs\_NY-2B**  
**PD-0.665105**

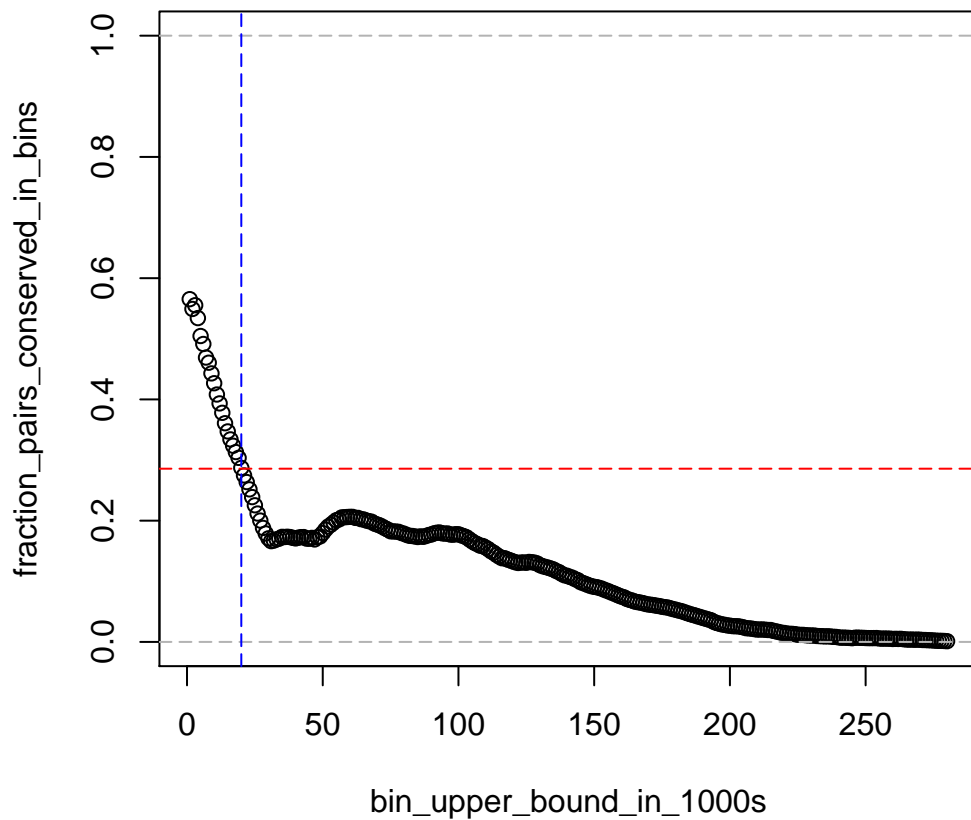

**Bin\_conservation\_minus\_bg\_CVG-1\_vs\_NY-2B**  
**PD-0.665105**

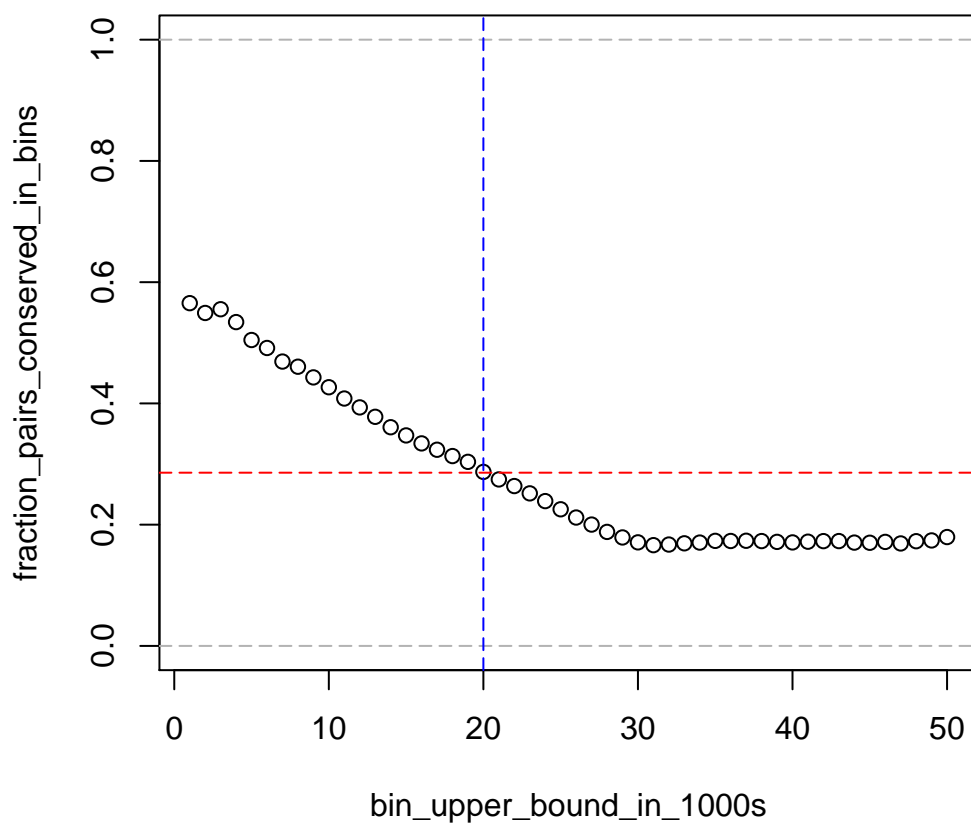

Supplement: s1 [file s1]

**Bin\_conservation\_minus\_bg\_CVR-1\_vs\_NE-JV-2**  
**PD-0.45755**

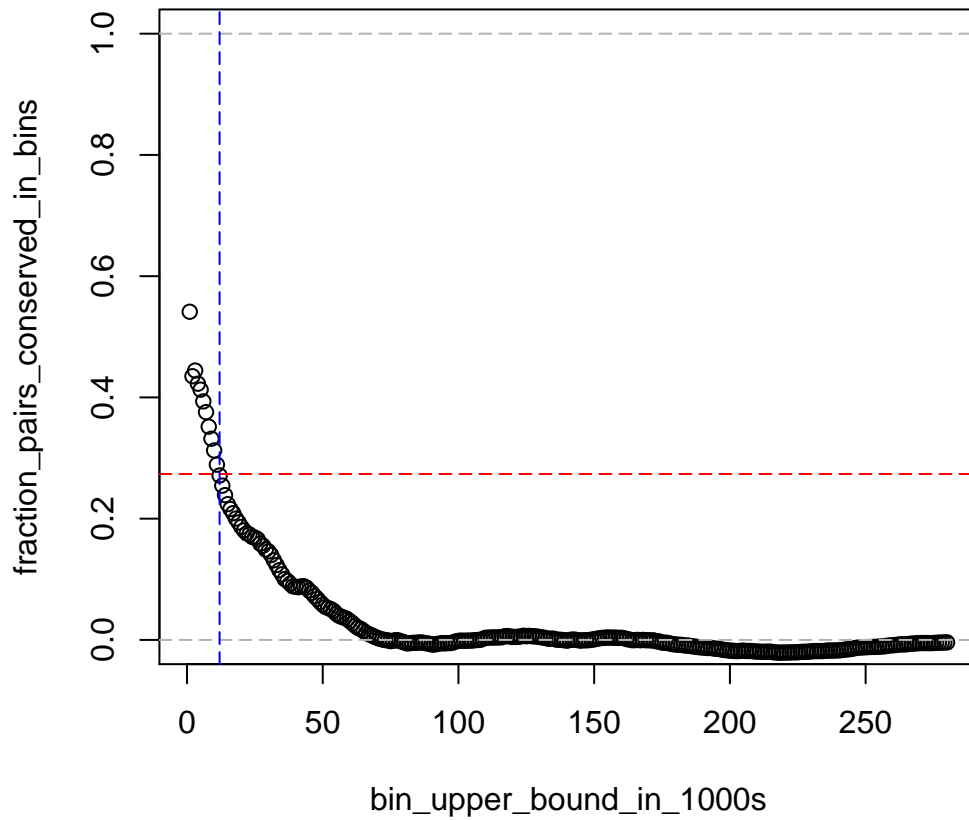

**Bin\_conservation\_minus\_bg\_CVR-1\_vs\_NE-JV-2**  
**PD-0.45755**

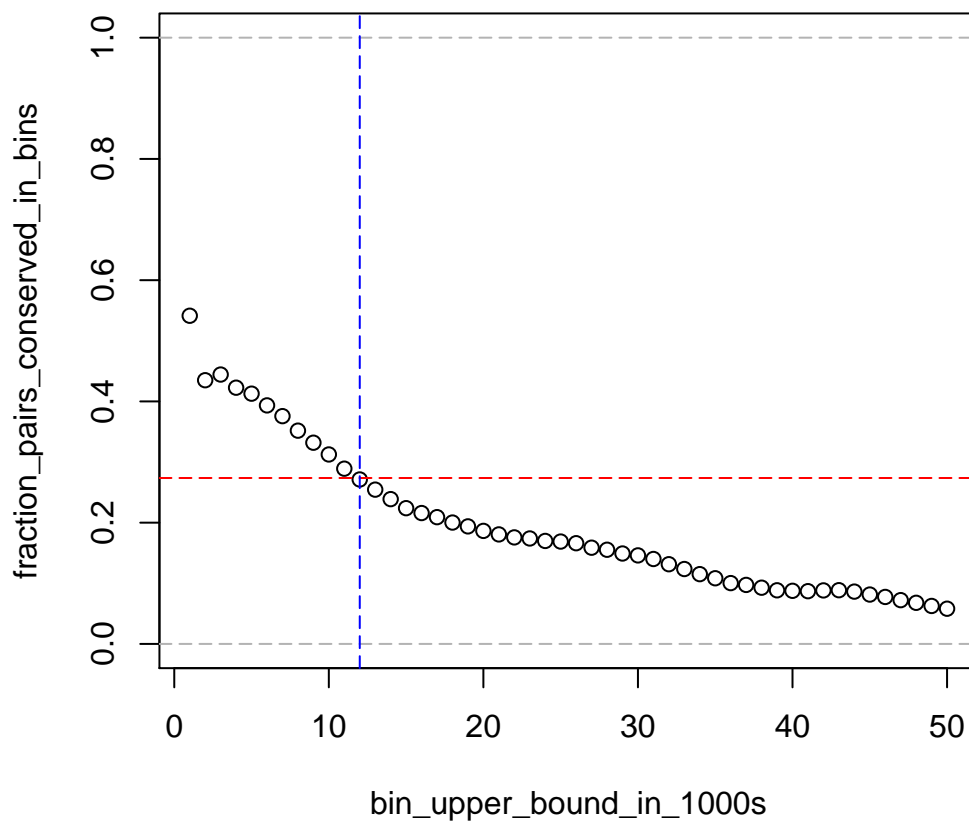

Supplement: s1 [file s1]

**Bin\_conservation\_minus\_bg\_CVB-1\_vs\_NE-JV-1**  
**PD-0.373303**

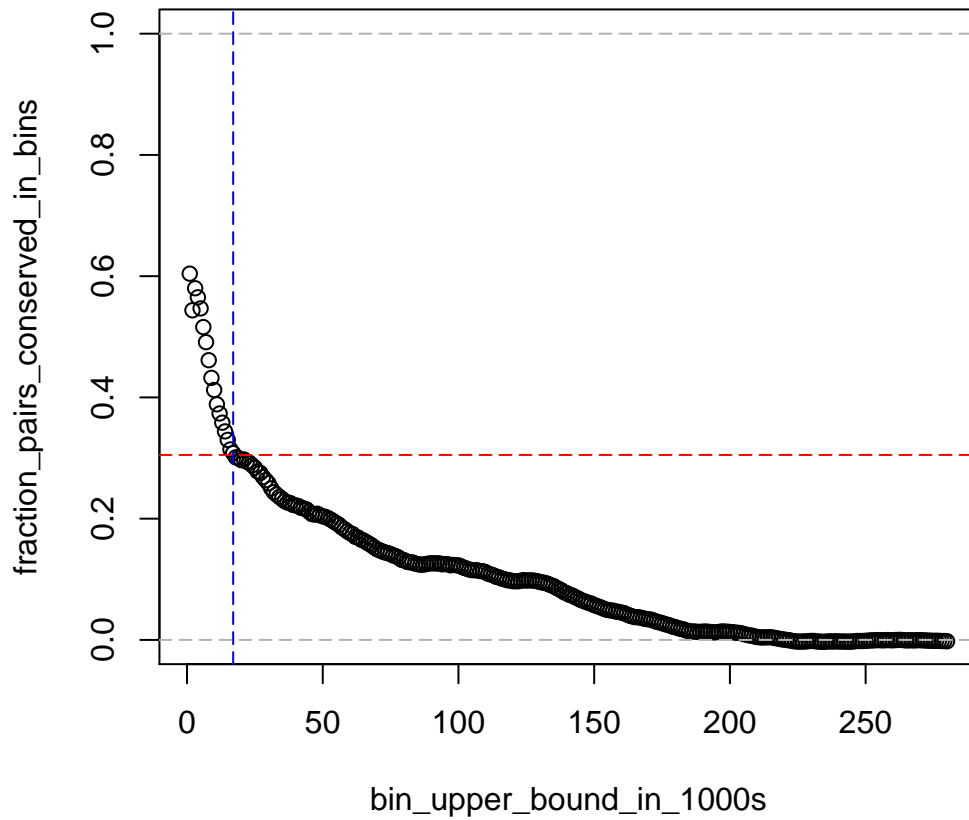

**Bin\_conservation\_minus\_bg\_CVB-1\_vs\_NE-JV-1**  
**PD-0.373303**

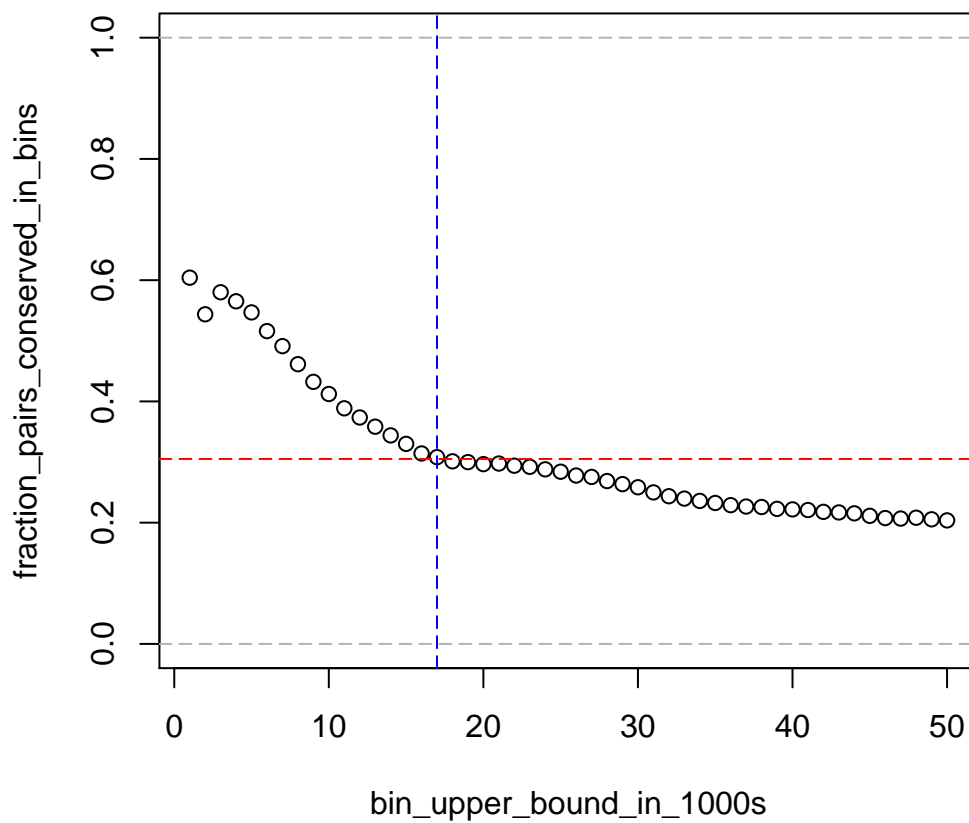

Supplement: s1 [file s1]

**Bin\_conservation\_minus\_bg\_CVA-1\_vs\_OR0704.2.2**  
**PD-0.033573**

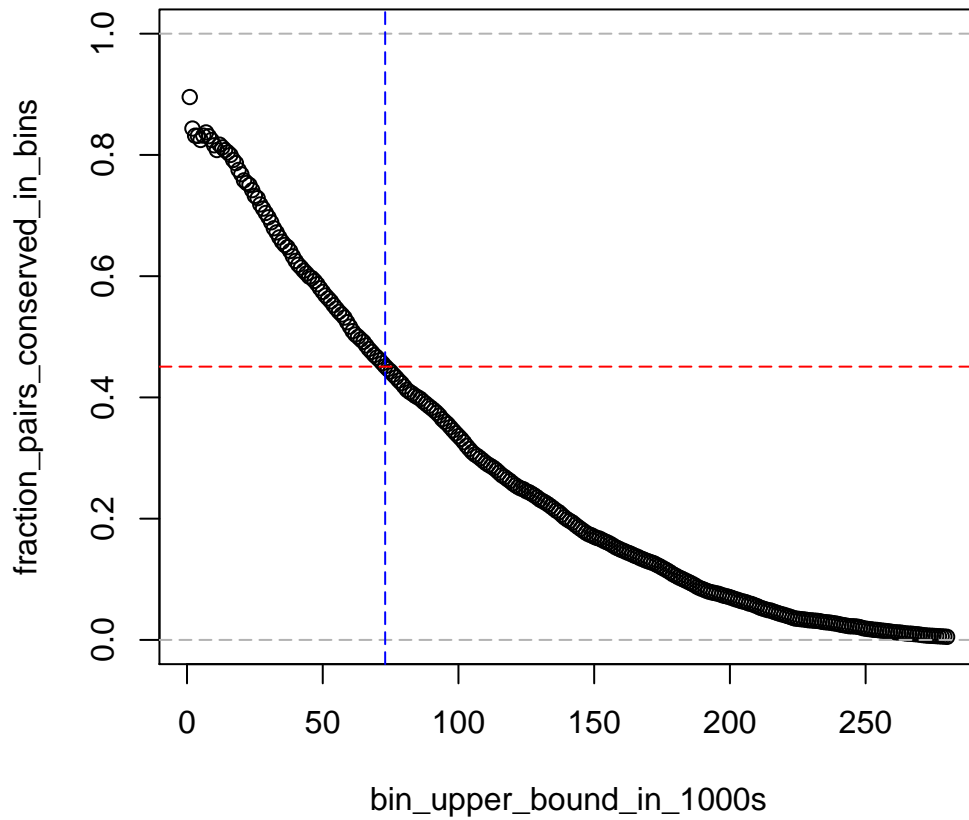

**Bin\_conservation\_minus\_bg\_CVA-1\_vs\_OR0704.2.2**  
**PD-0.033573**

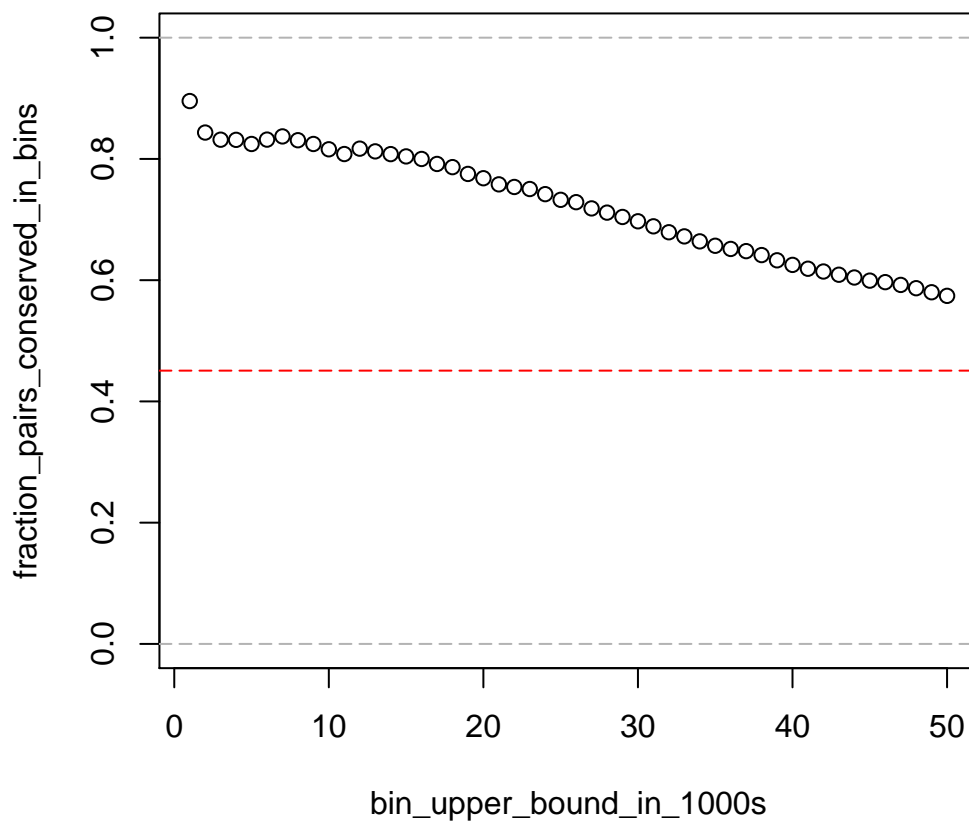

Supplement: s1 [file s1]

**Bin\_conservation\_minus\_bg\_CVM-1\_vs\_MO0605SPH**  
**PD-0.462895**

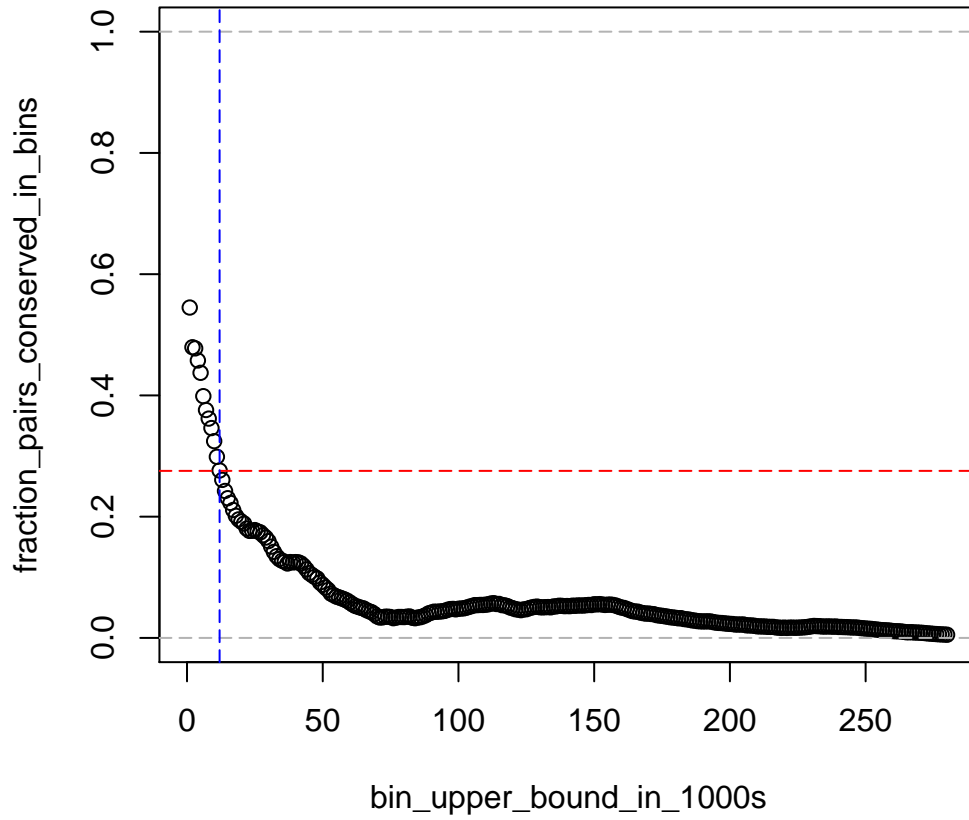

**Bin\_conservation\_minus\_bg\_CVM-1\_vs\_MO0605SPH**  
**PD-0.462895**

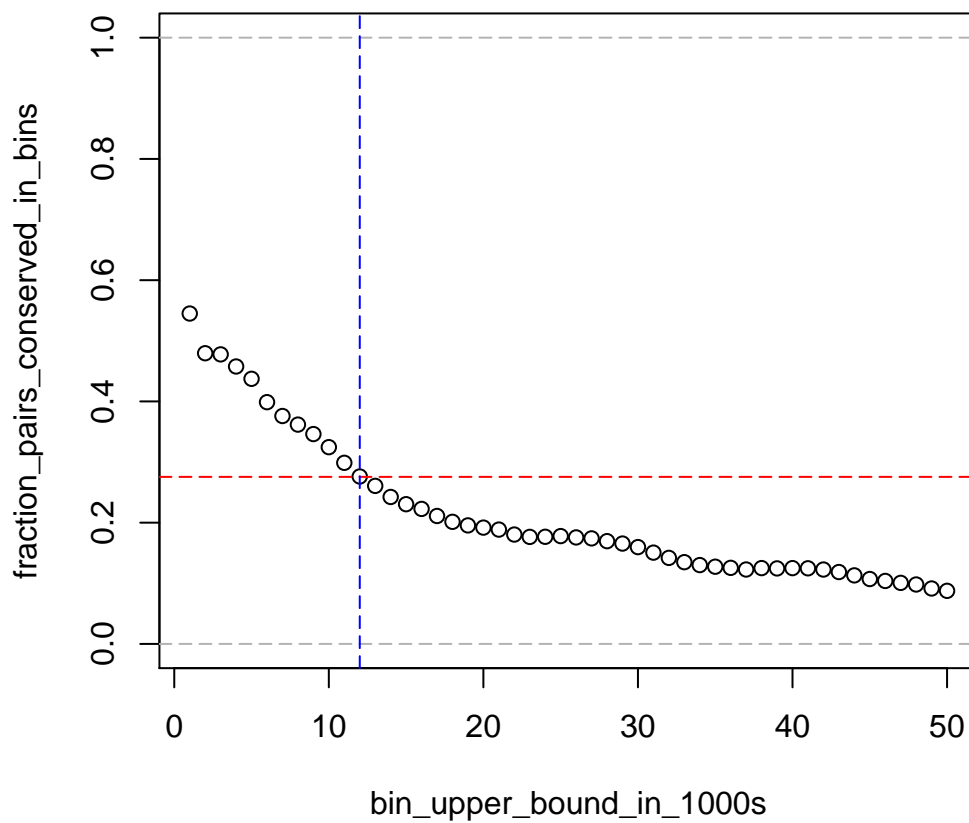

Supplement: s1 [file s1]

**Bin\_conservation\_minus\_bg\_Br0604L\_vs\_PBCV1**  
**PD-0.666027**

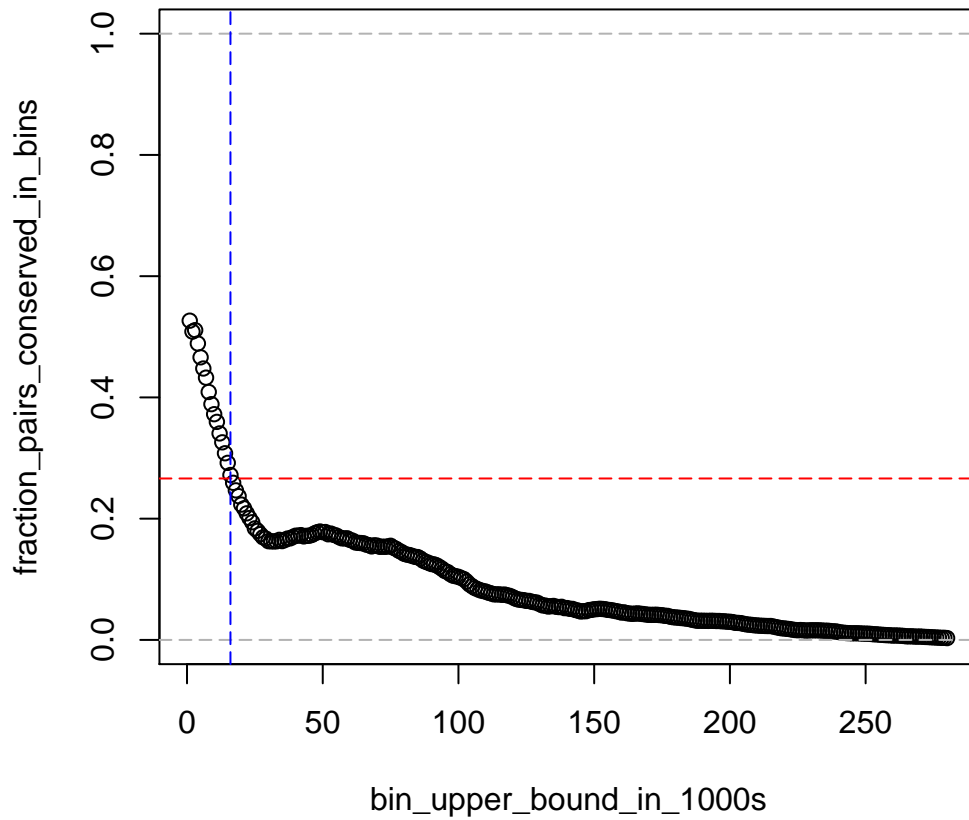

**Bin\_conservation\_minus\_bg\_Br0604L\_vs\_PBCV1**  
**PD-0.666027**

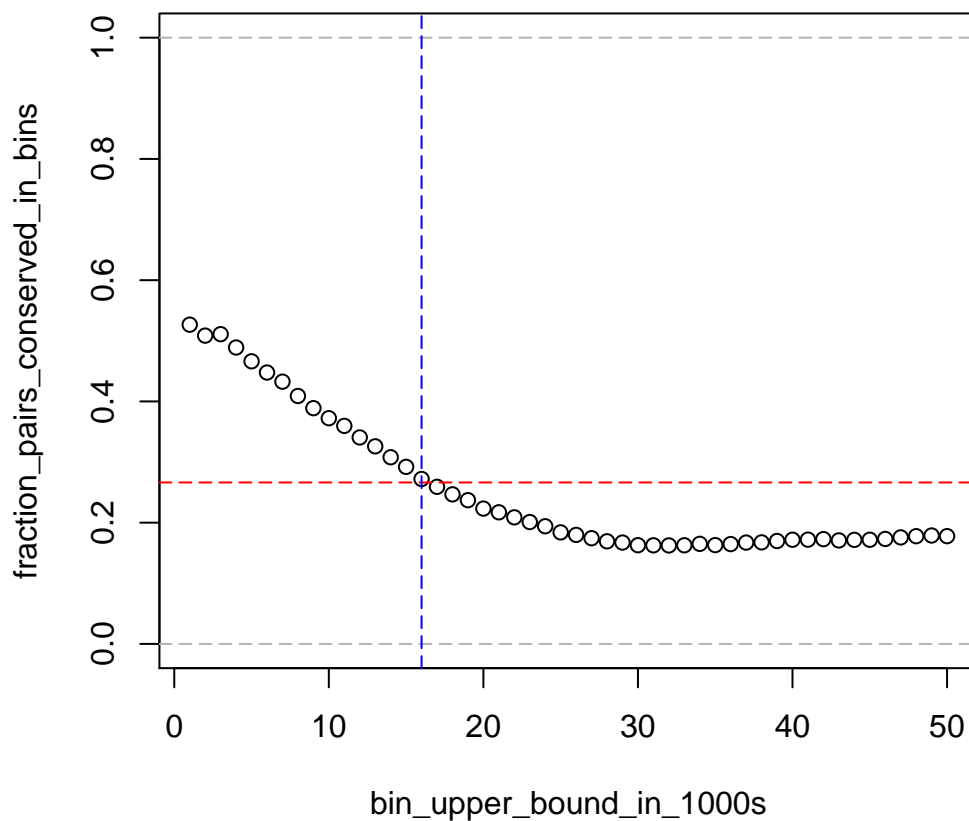

Supplement: s1 [file s1]

**Bin\_conservation\_minus\_bg\_AN69C\_vs\_CVM-1**  
**PD-0.635497**

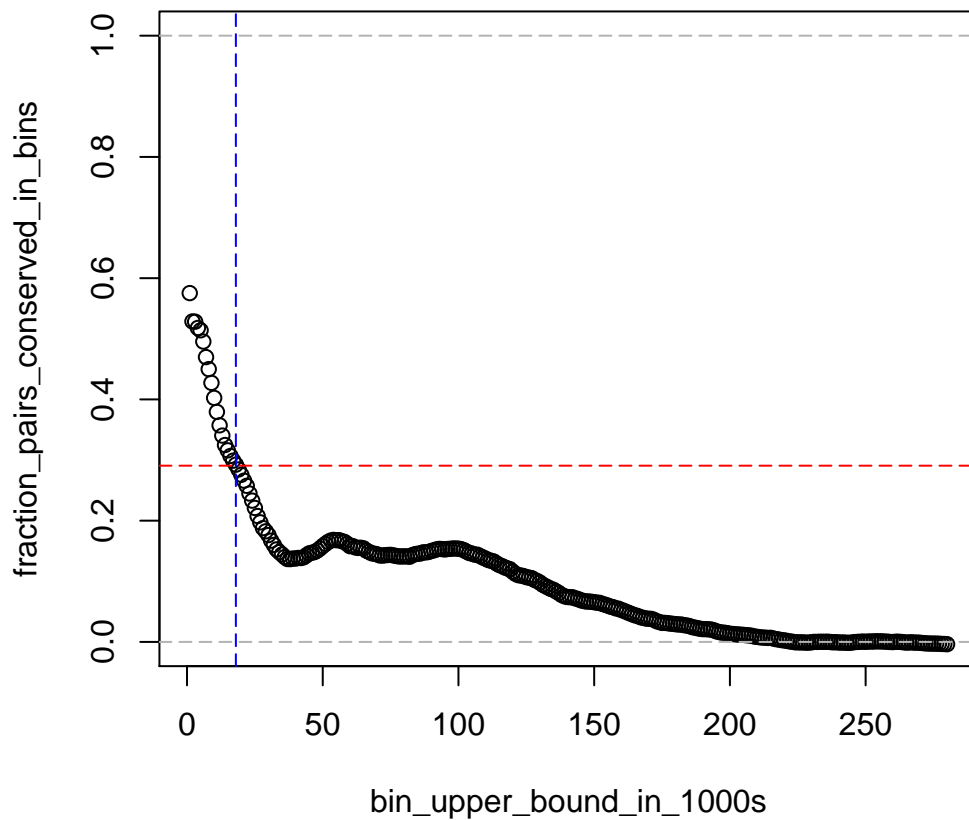

**Bin\_conservation\_minus\_bg\_AN69C\_vs\_CVM-1**  
**PD-0.635497**

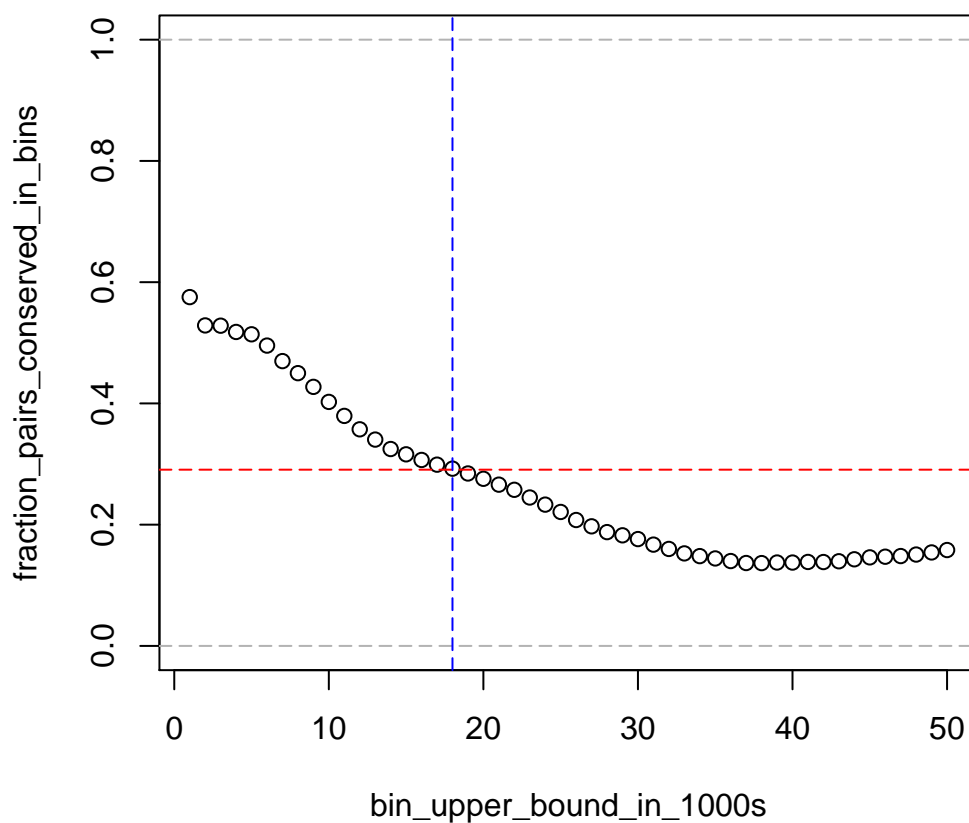

Supplement: s1 [file s1]

**Bin\_conservation\_minus\_bg\_CZ-2\_vs\_NY2A**  
**PD-0.67284**

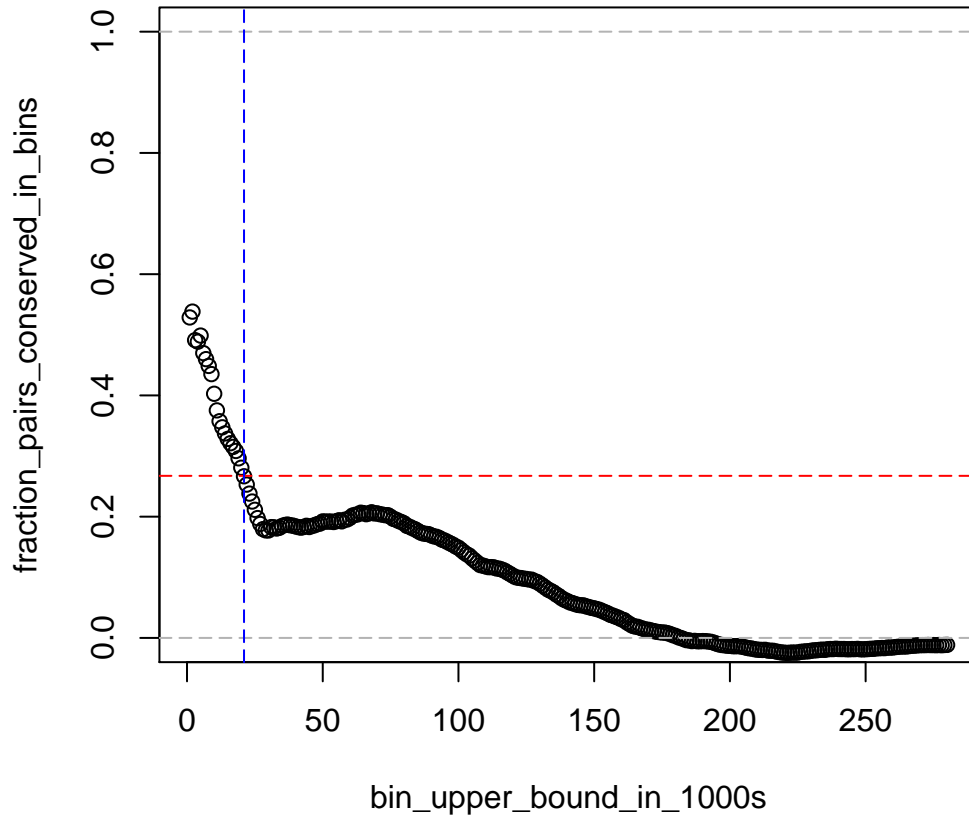

**Bin\_conservation\_minus\_bg\_CZ-2\_vs\_NY2A**  
**PD-0.67284**

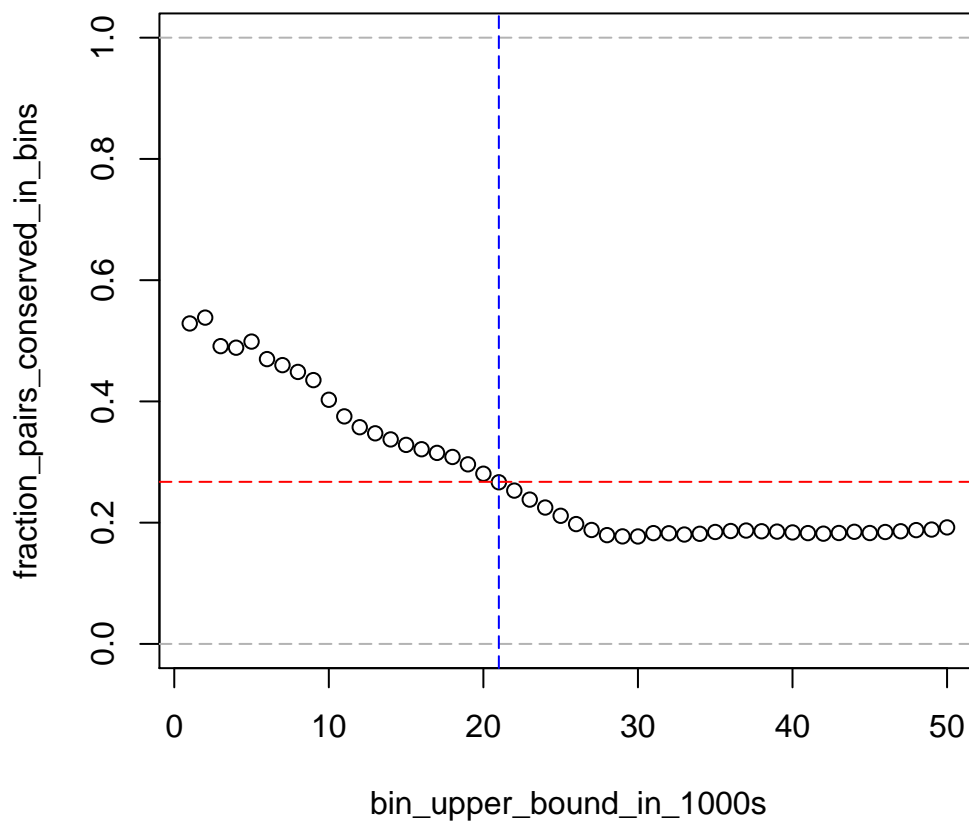

Supplement: s1 [file s1]

**Bin\_conservation\_minus\_bg\_CVA-1\_vs\_CVR-1**  
**PD-0**

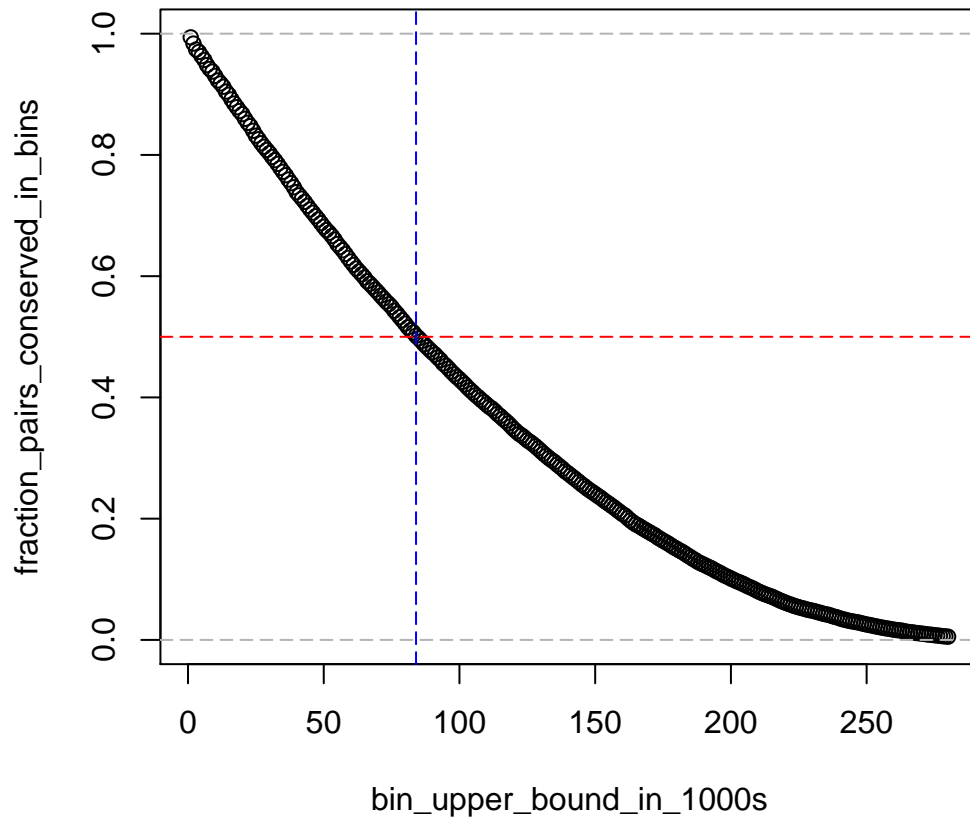

**Bin\_conservation\_minus\_bg\_CVA-1\_vs\_CVR-1**  
**PD-0**

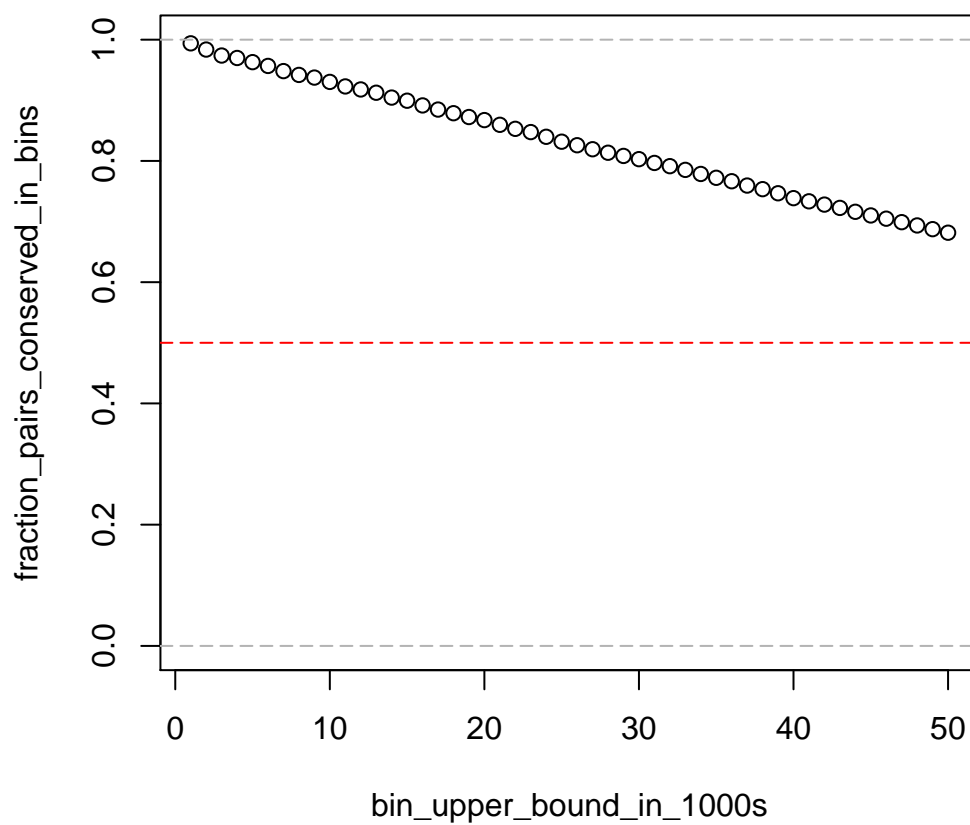

Supplement: s1 [file s1]

**Bin\_conservation\_minus\_bg\_NY-2B\_vs\_WI0606**  
**PD-0.70938**

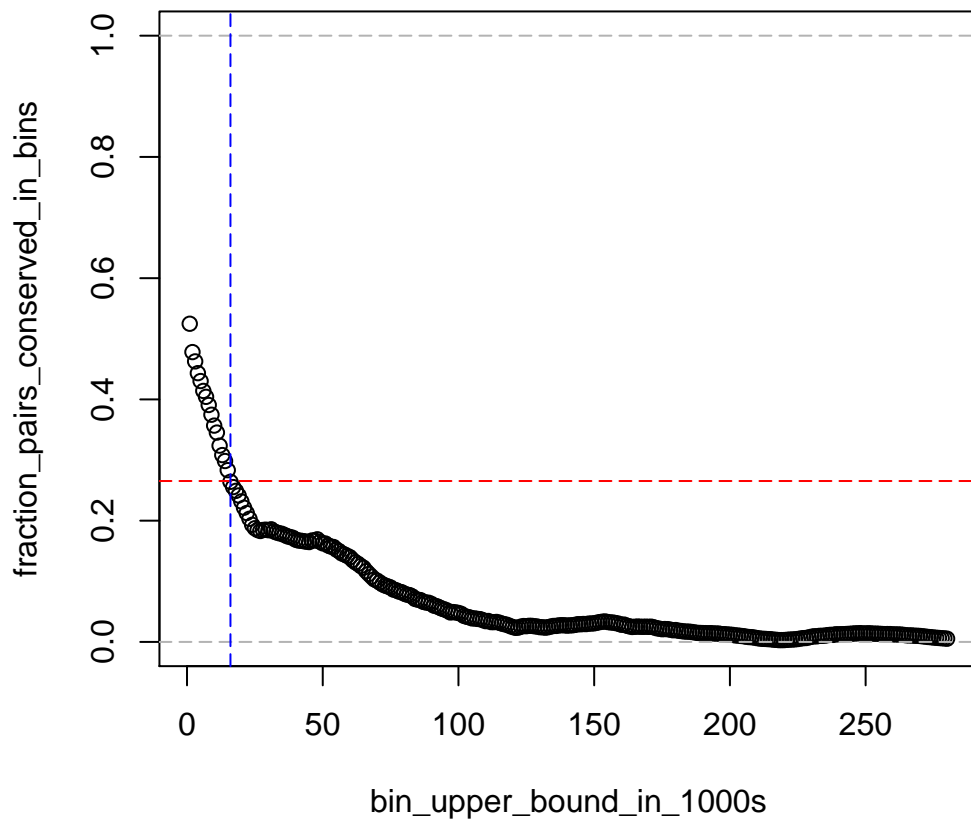

**Bin\_conservation\_minus\_bg\_NY-2B\_vs\_WI0606**  
**PD-0.70938**

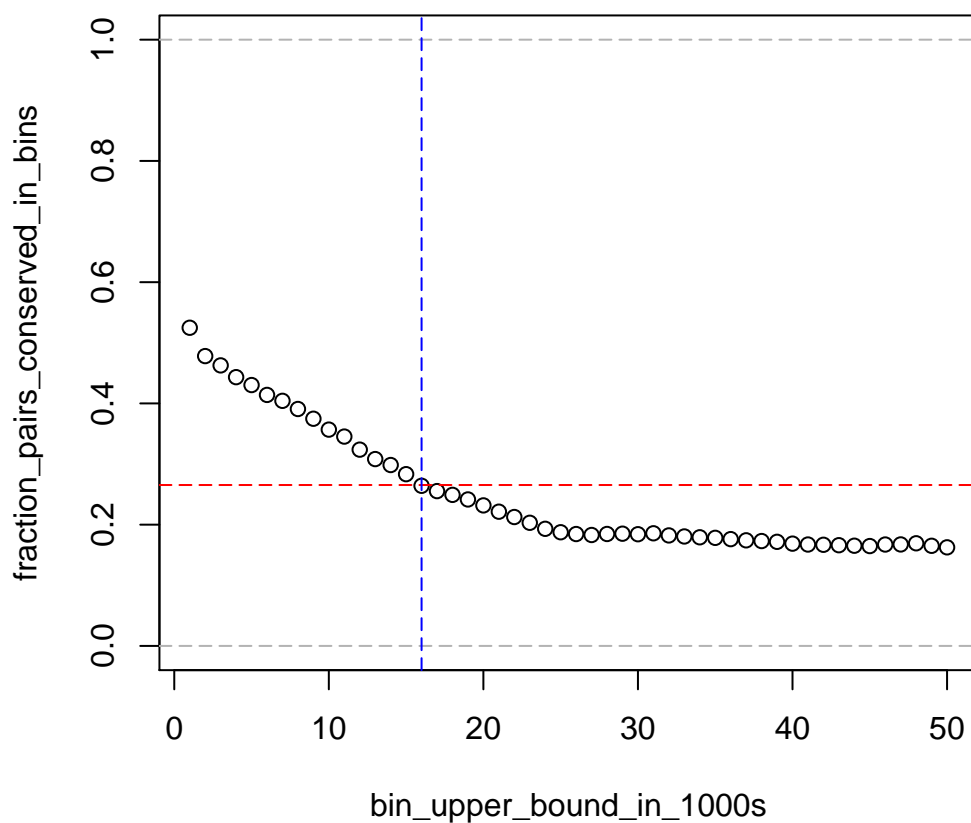

Supplement: s1 [file s1]

**Bin\_conservation\_minus\_bg\_AP110A\_vs\_CVB-1**  
**PD-0.034081**

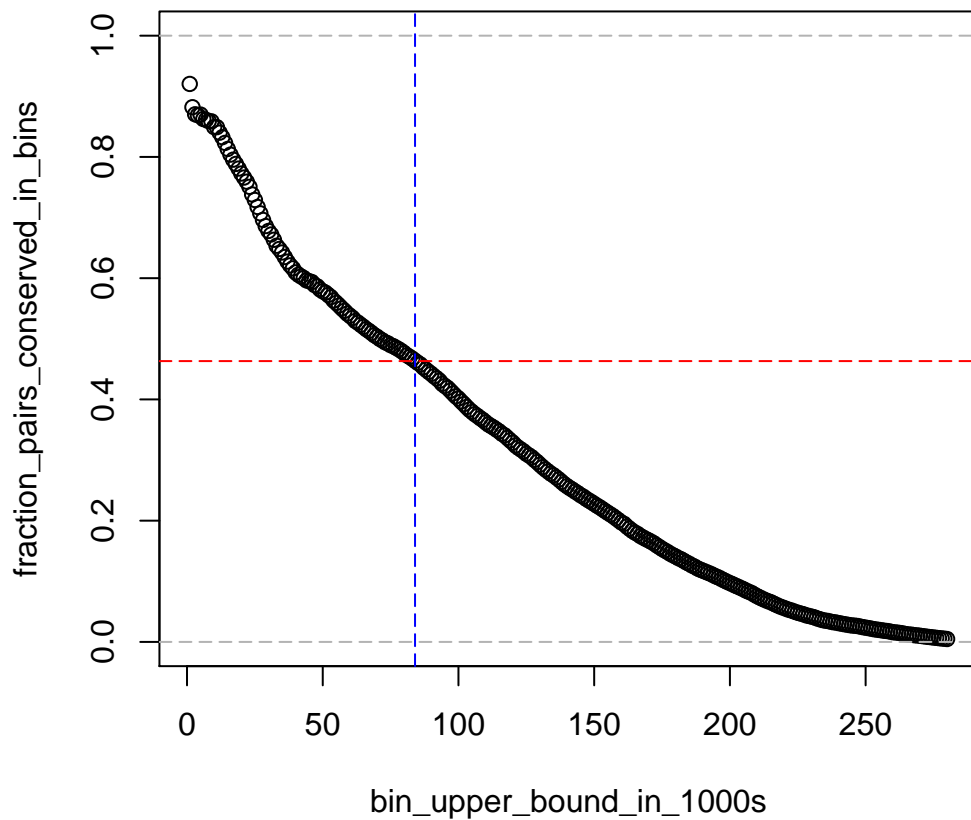

**Bin\_conservation\_minus\_bg\_AP110A\_vs\_CVB-1**  
**PD-0.034081**

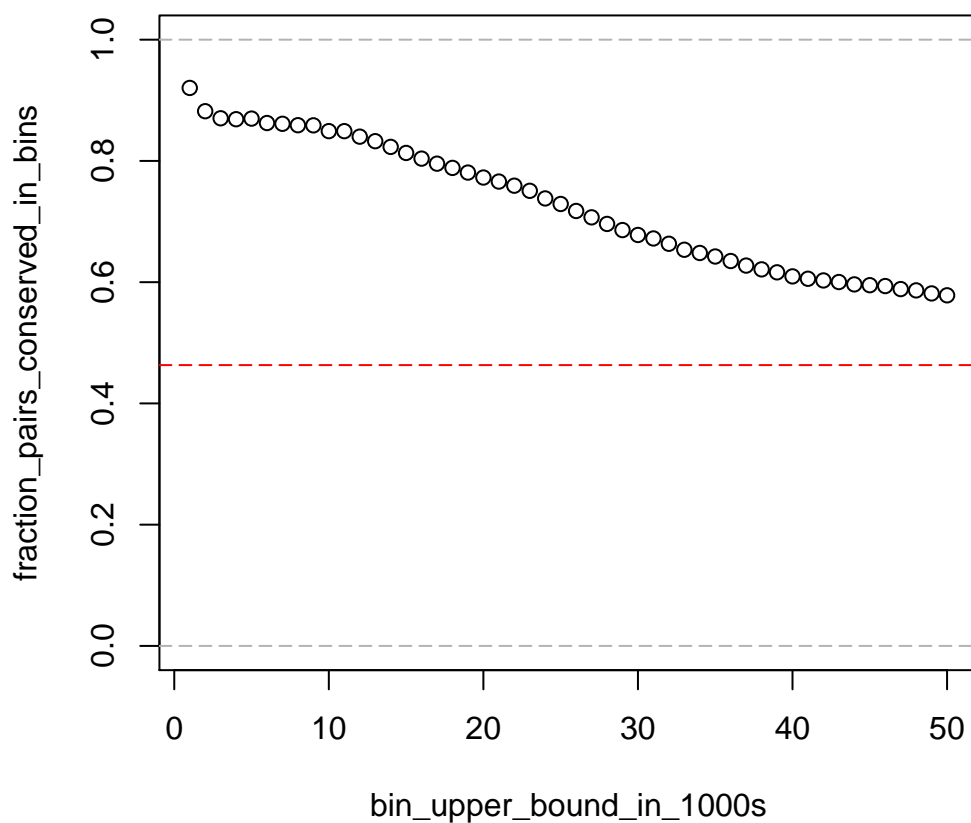

Supplement: s1 [file s1]

**Bin\_conservation\_minus\_bg\_KS1B\_vs\_NY-2B**  
**PD-0.149425**

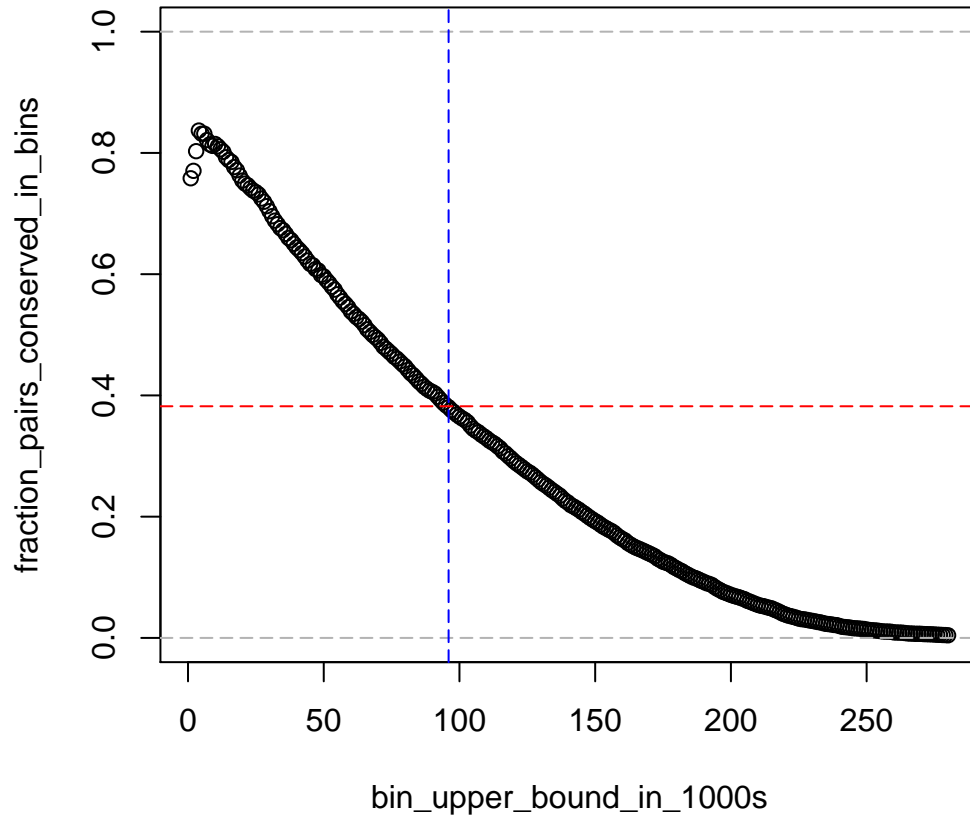

**Bin\_conservation\_minus\_bg\_KS1B\_vs\_NY-2B**  
**PD-0.149425**

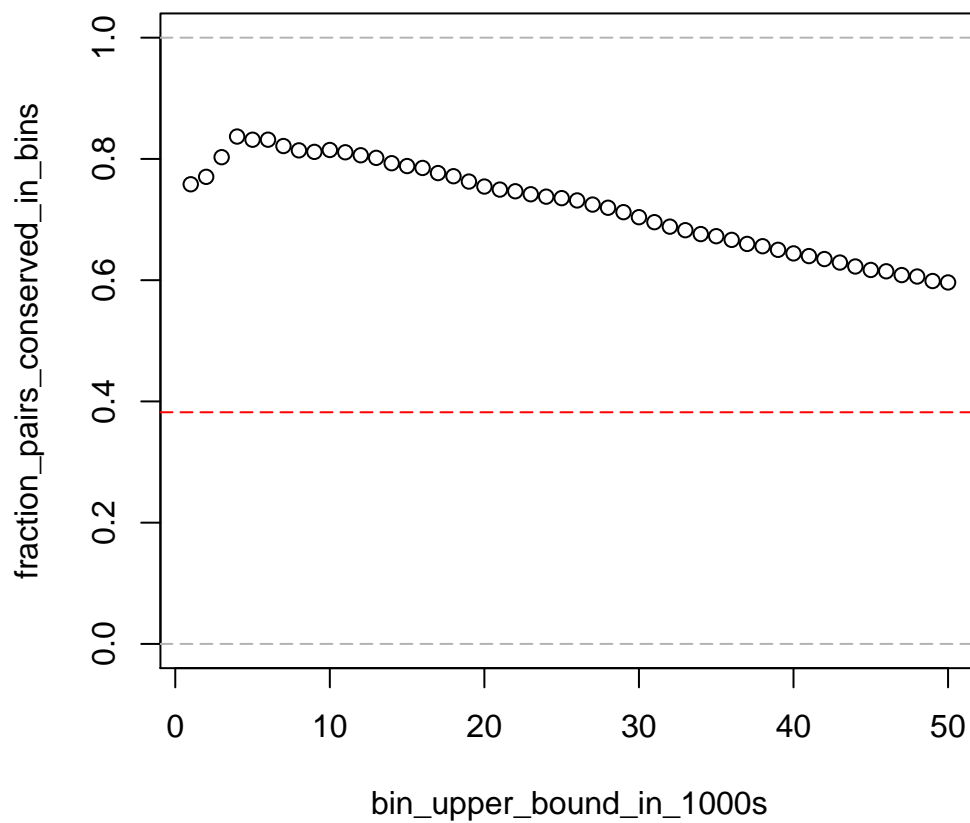

Supplement: s1 [file s1]

**Bin\_conservation\_minus\_bg\_IL-5-2s1\_vs\_NE-JV-3**  
**PD-0.703954**

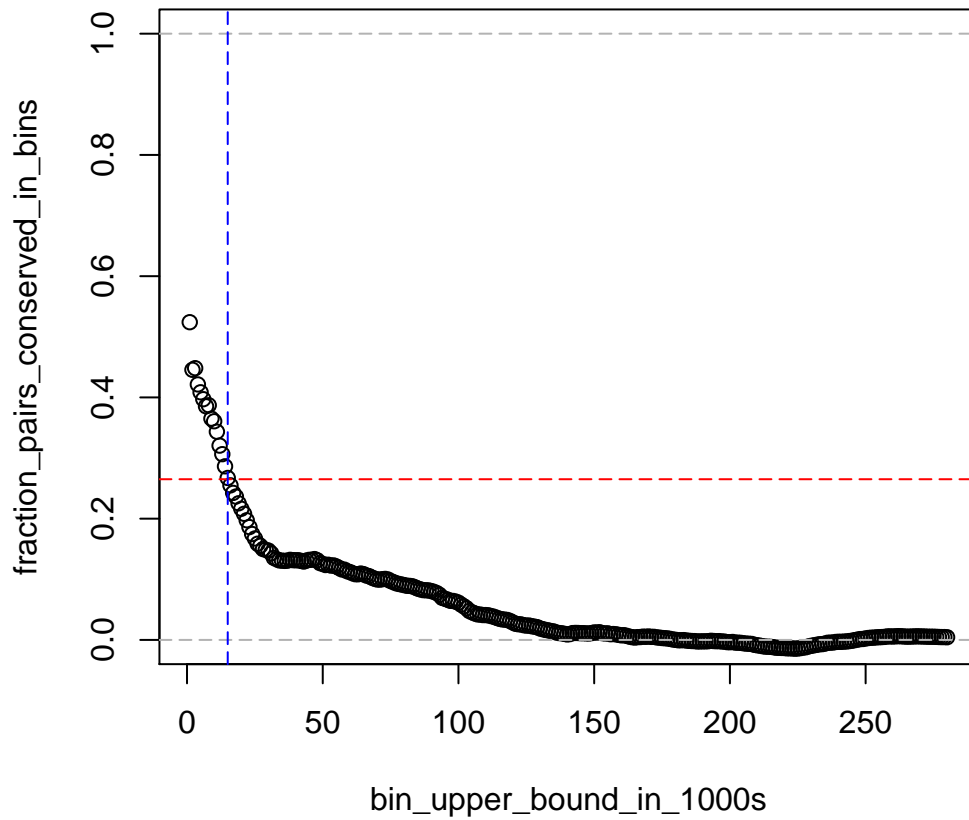

**Bin\_conservation\_minus\_bg\_IL-5-2s1\_vs\_NE-JV-3**  
**PD-0.703954**

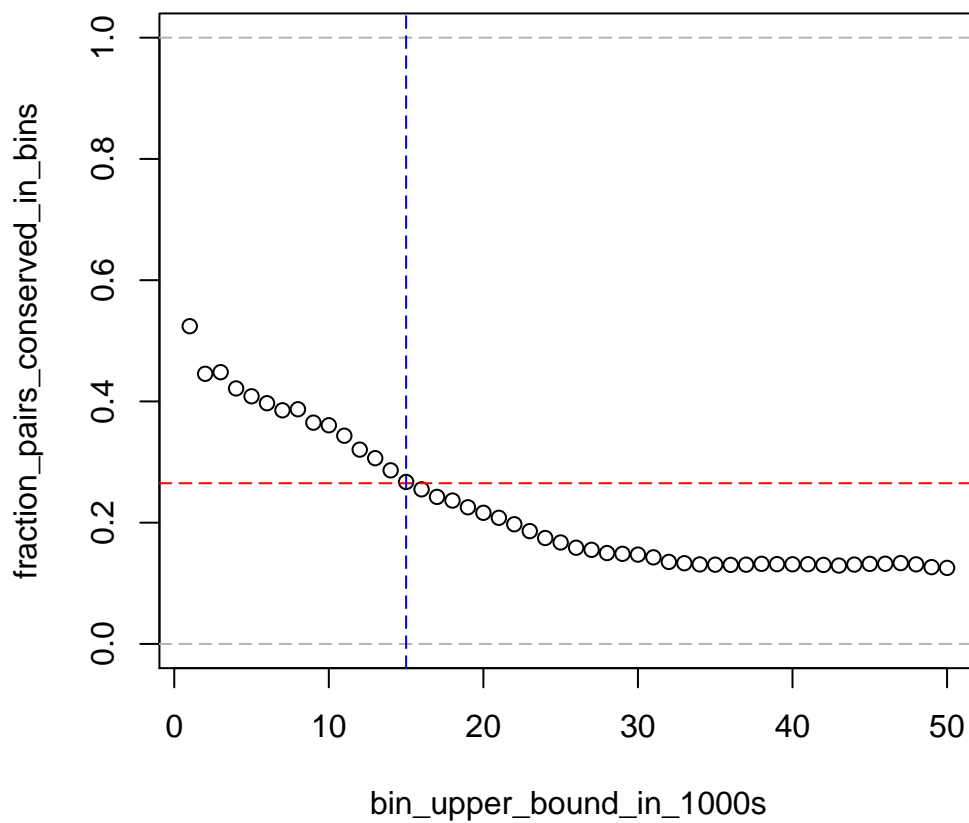

Supplement: s1 [file s1]

**Bin\_conservation\_minus\_bg\_NE-JV-1\_vs\_NE-JV-3**  
**PD-0.494472**

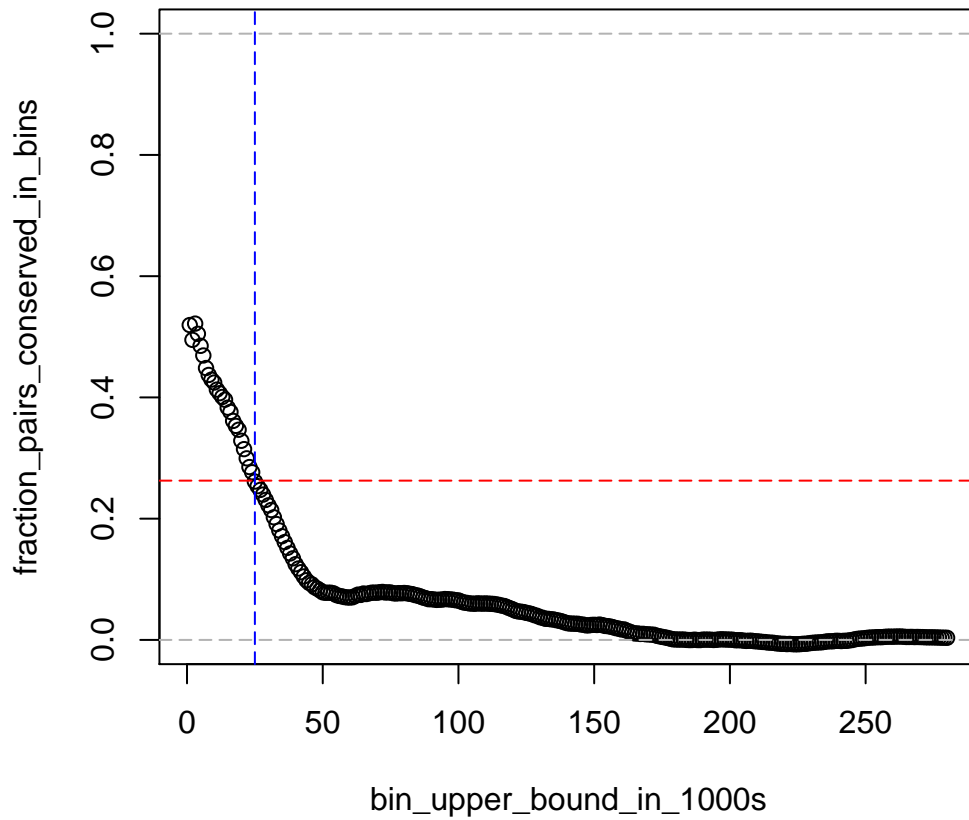

**Bin\_conservation\_minus\_bg\_NE-JV-1\_vs\_NE-JV-3**  
**PD-0.494472**

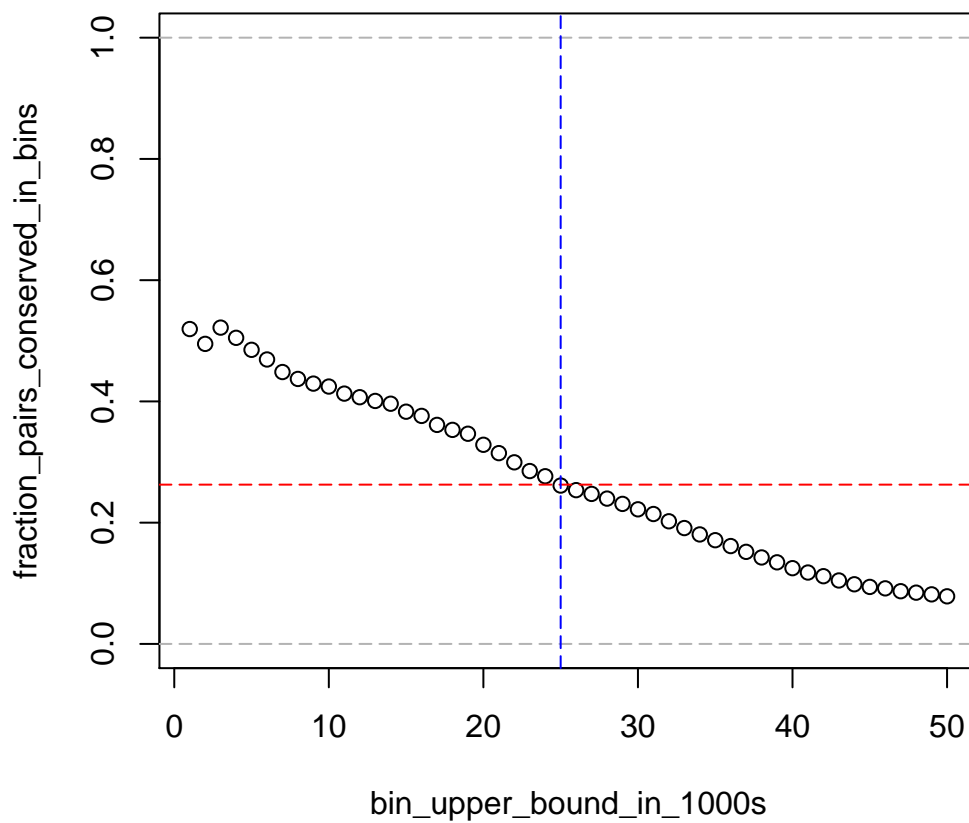

Supplement: s1 [file s1]

**Bin\_conservation\_minus\_bg\_CvsA1\_vs\_NE-JV-1**  
**PD-0.686418**

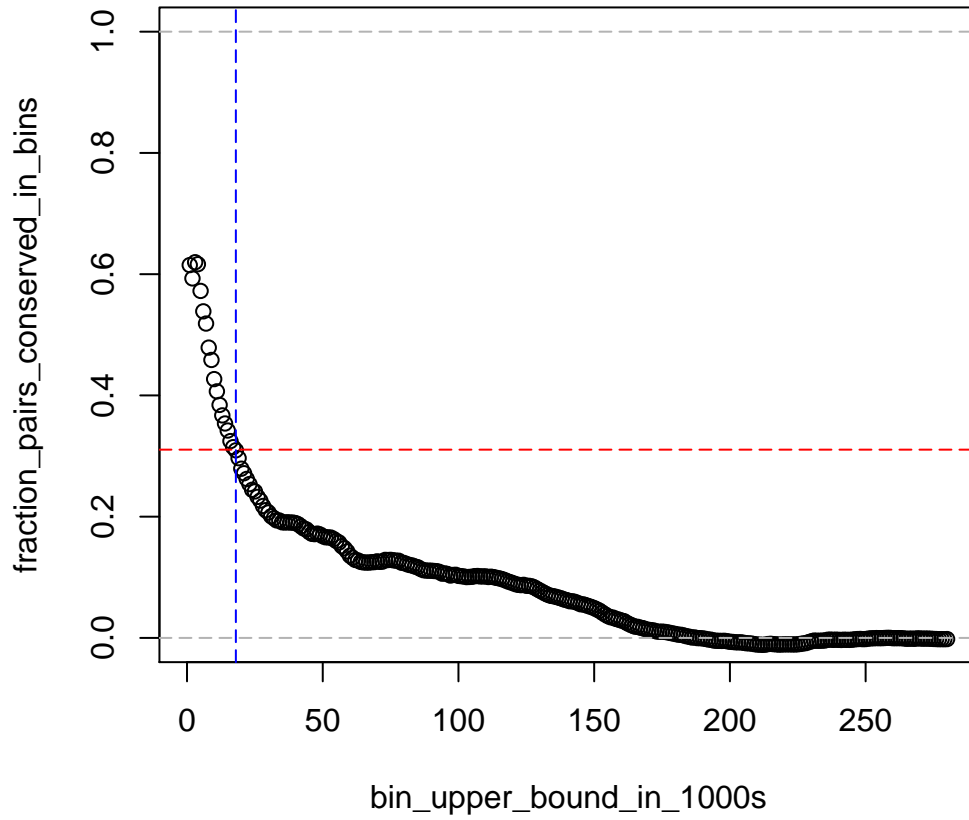

**Bin\_conservation\_minus\_bg\_CvsA1\_vs\_NE-JV-1**  
**PD-0.686418**

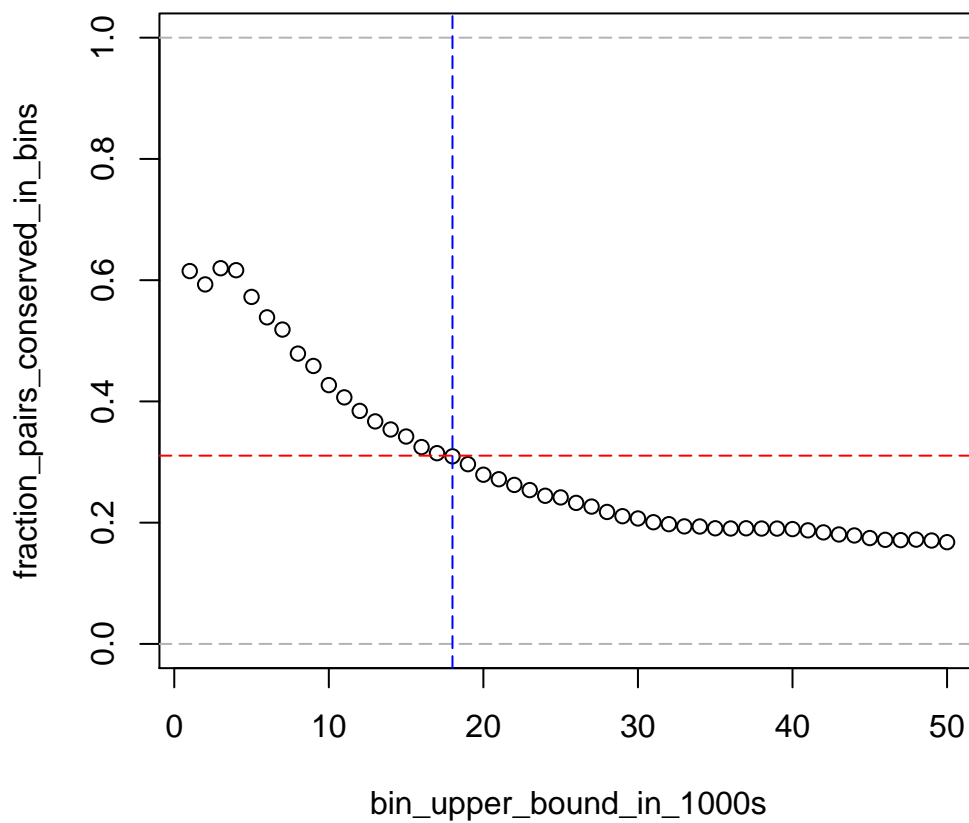

Supplement: s1 [file s1]

**Bin\_conservation\_minus\_bg\_Can0610SP\_vs\_NY-2B**  
**PD-0.705603**

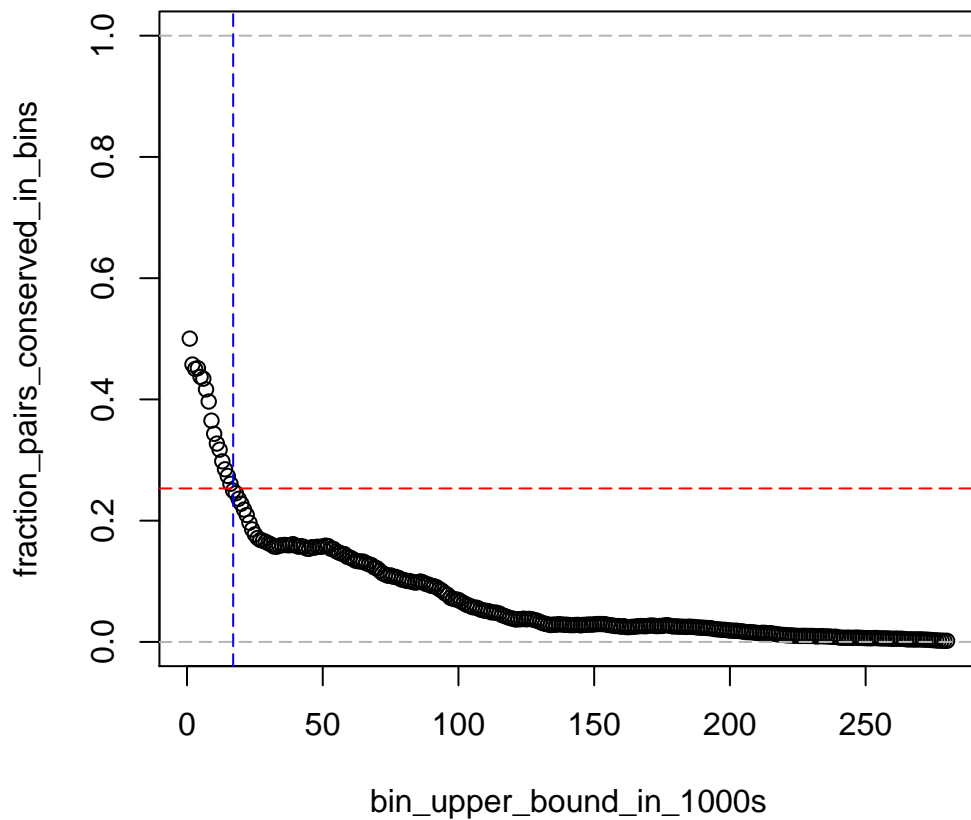

**Bin\_conservation\_minus\_bg\_Can0610SP\_vs\_NY-2B**  
**PD-0.705603**

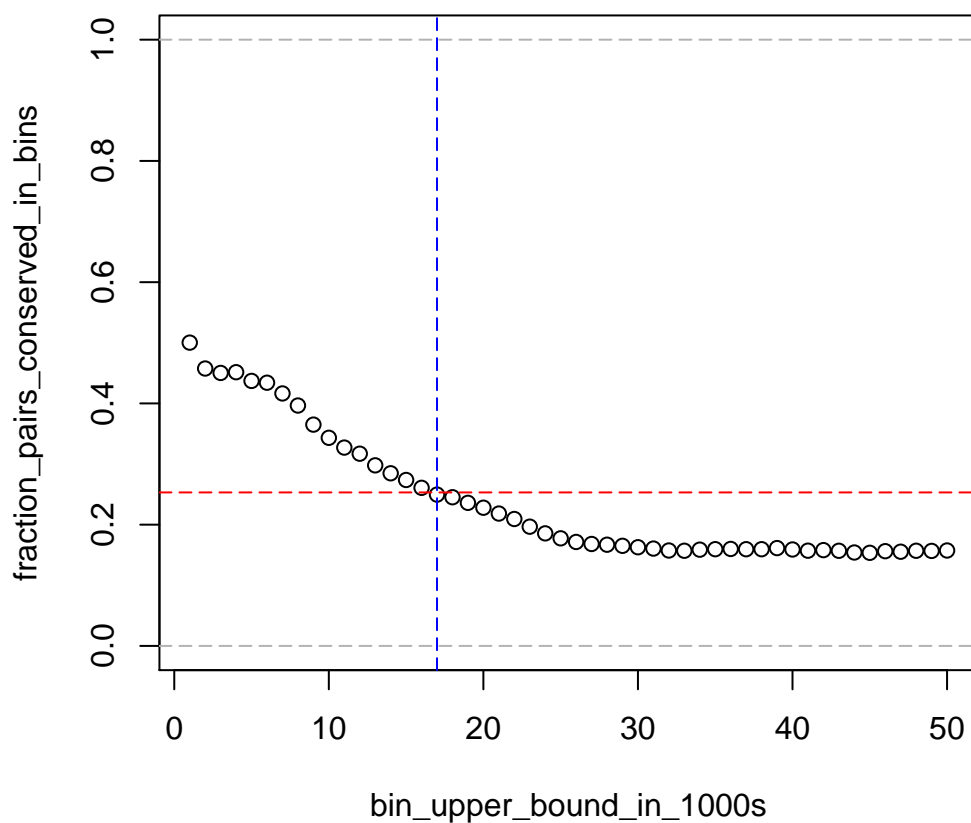

Supplement: s1 [file s1]

**Bin\_conservation\_minus\_bg\_Br0604L\_vs\_NTS-1**  
**PD-0.056343**

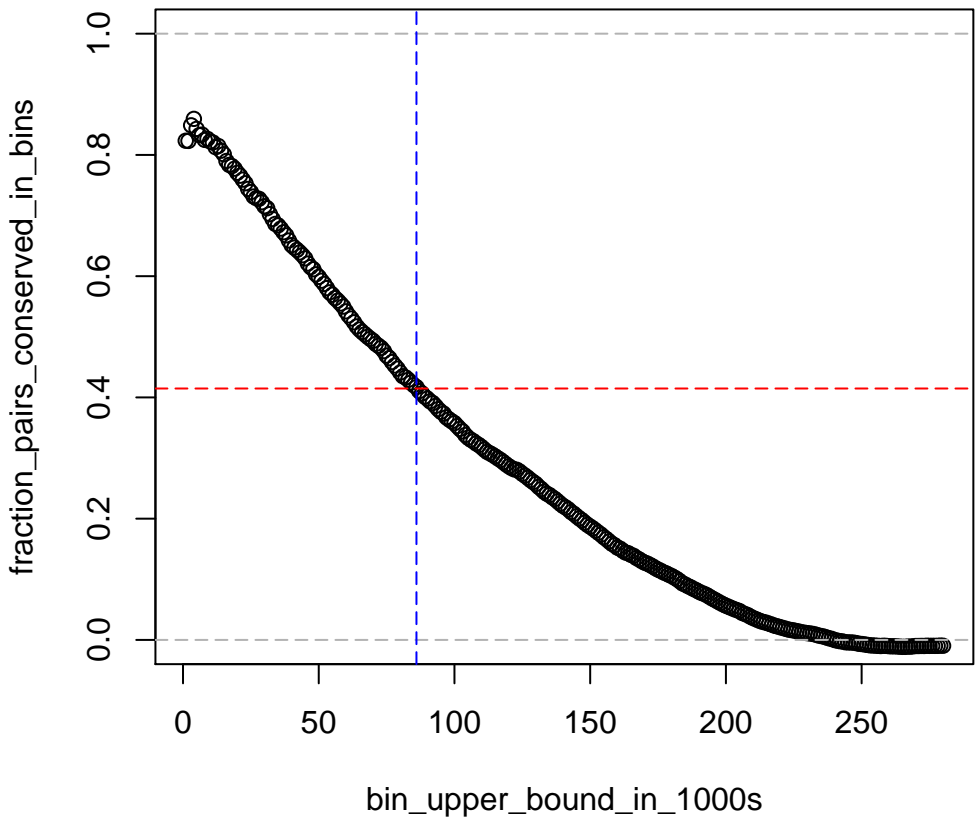

**Bin\_conservation\_minus\_bg\_Br0604L\_vs\_NTS-1**  
**PD-0.056343**

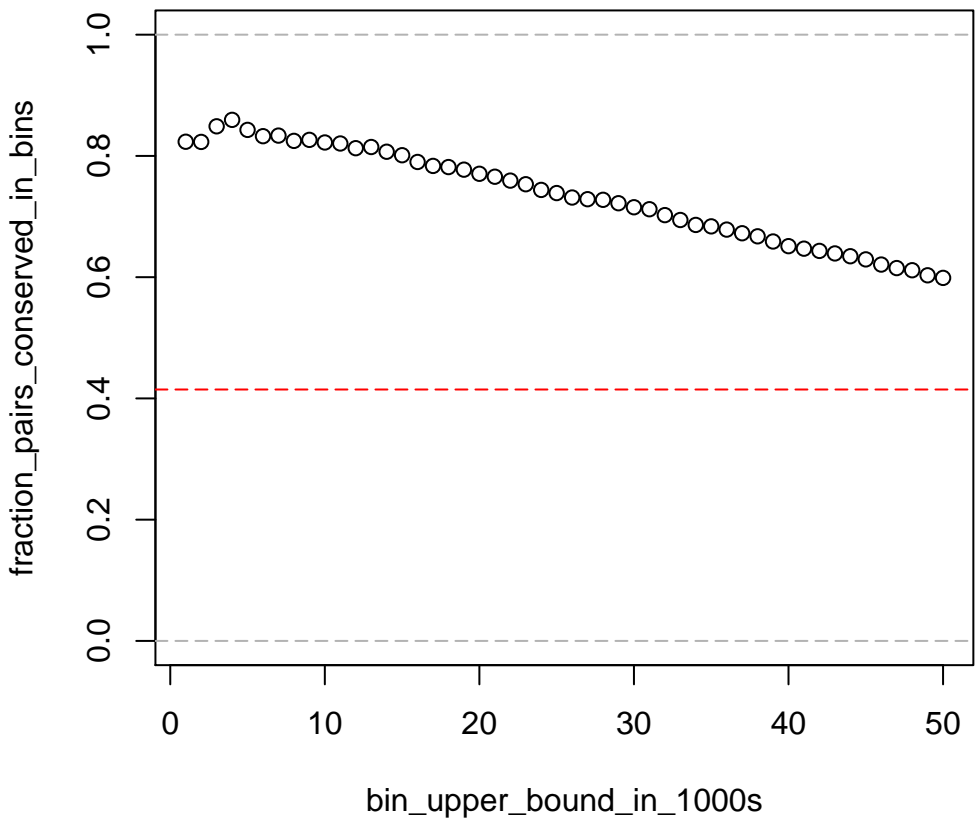

Supplement: s1 [file s1]

**Bin\_conservation\_minus\_bg\_Can0610SP\_vs\_Can18-4**  
**PD-0.470013**

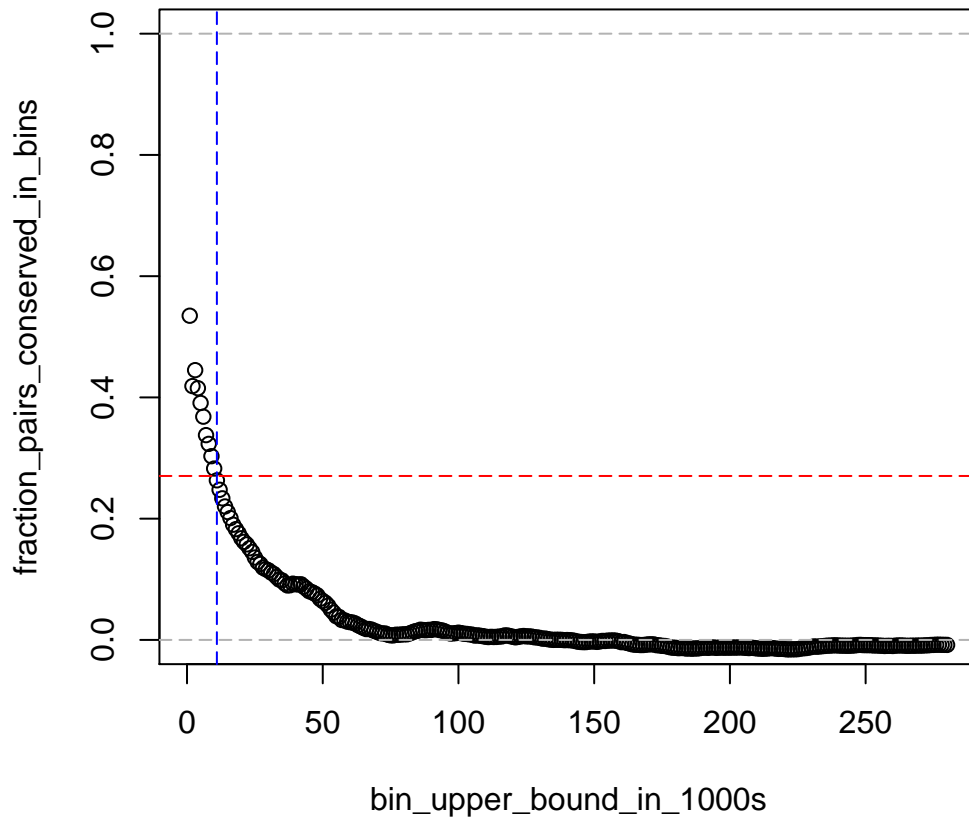

**Bin\_conservation\_minus\_bg\_Can0610SP\_vs\_Can18-4**  
**PD-0.470013**

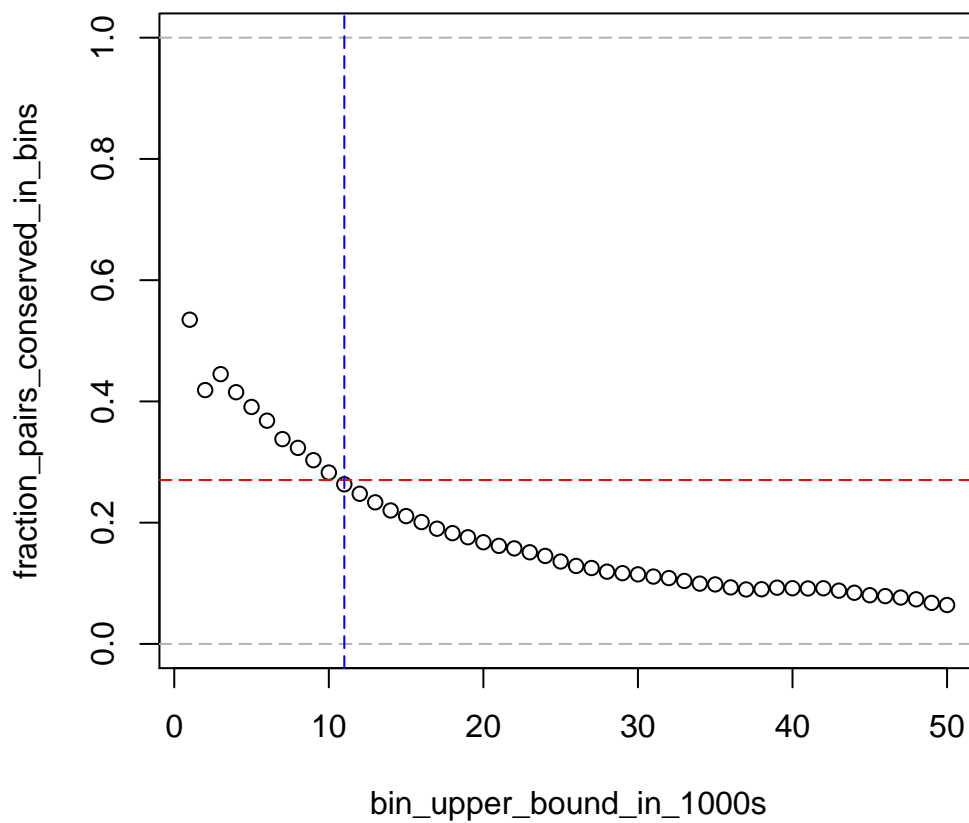

Supplement: s1 [file s1]

**Bin\_conservation\_minus\_bg\_AR158\_vs\_Br0604L**  
**PD-0.694683**

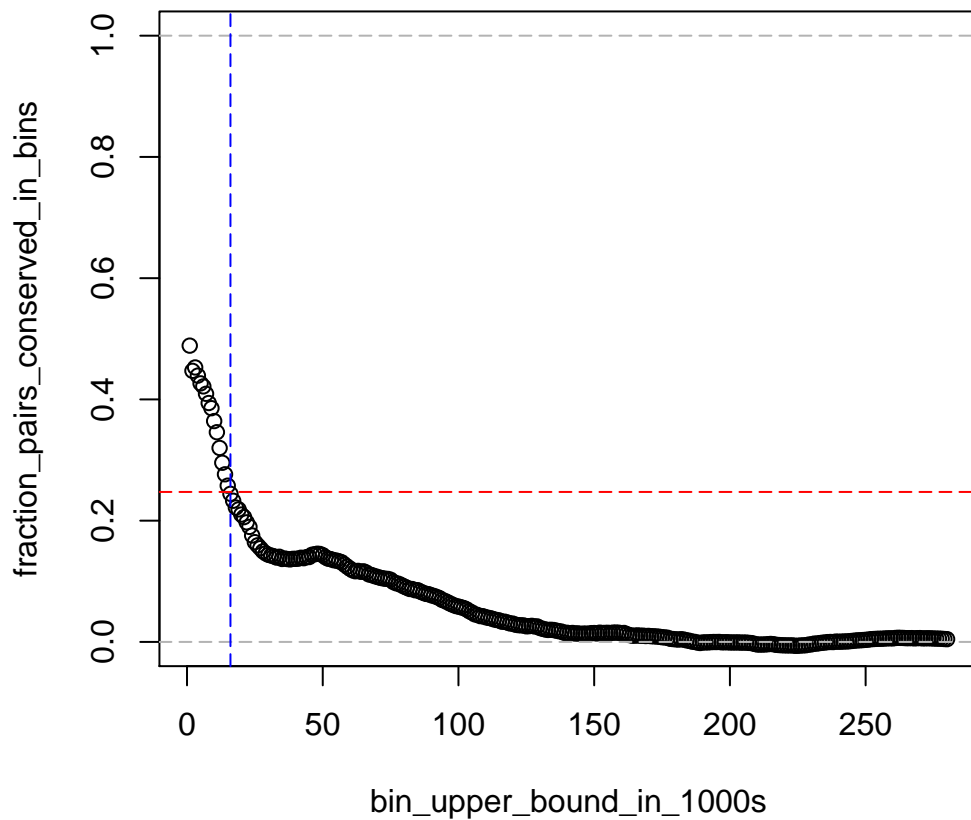

**Bin\_conservation\_minus\_bg\_AR158\_vs\_Br0604L**  
**PD-0.694683**

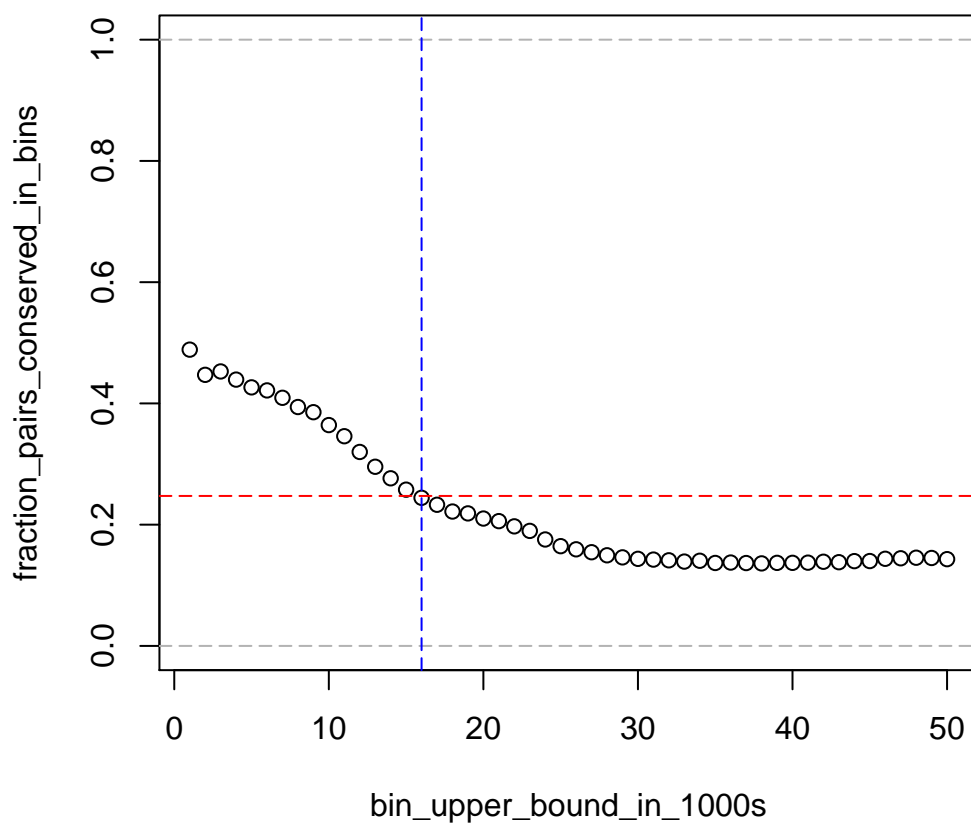

Supplement: s1 [file s1]

**Bin\_conservation\_minus\_bg\_CviKI\_vs\_TN603.4.2**  
**PD-0.683227**

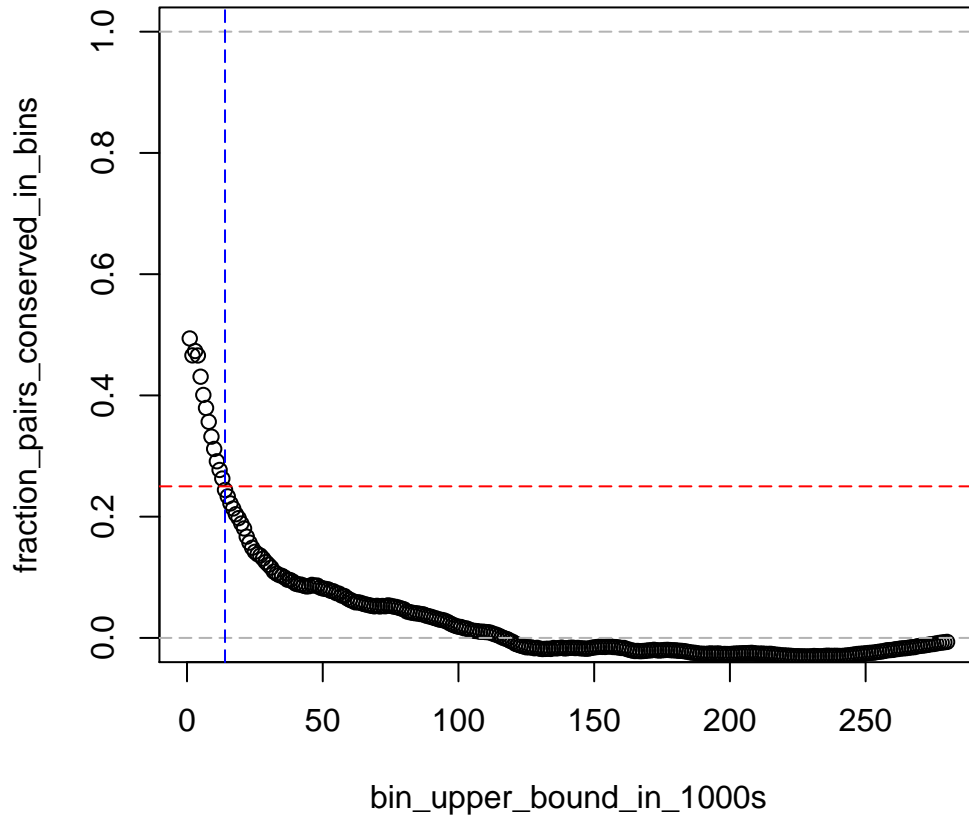

**Bin\_conservation\_minus\_bg\_CviKI\_vs\_TN603.4.2**  
**PD-0.683227**

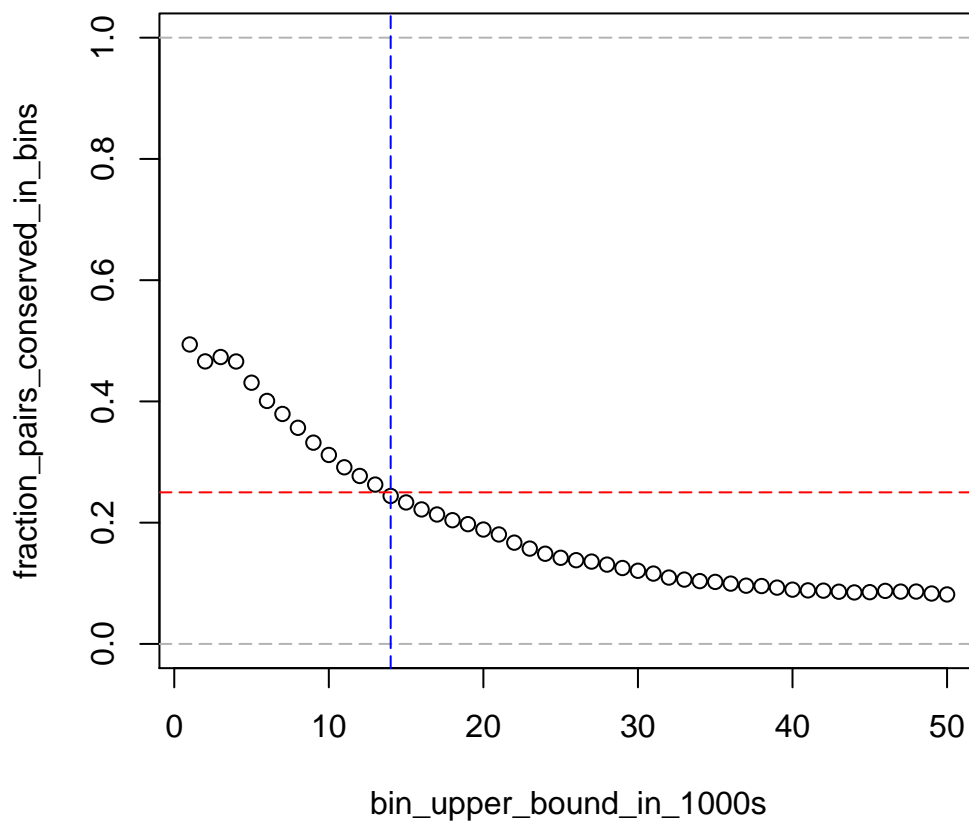

Supplement: s1 [file s1]

**Bin\_conservation\_minus\_bg\_Canal-1\_vs\_Fr5L**  
**PD-0.459824**

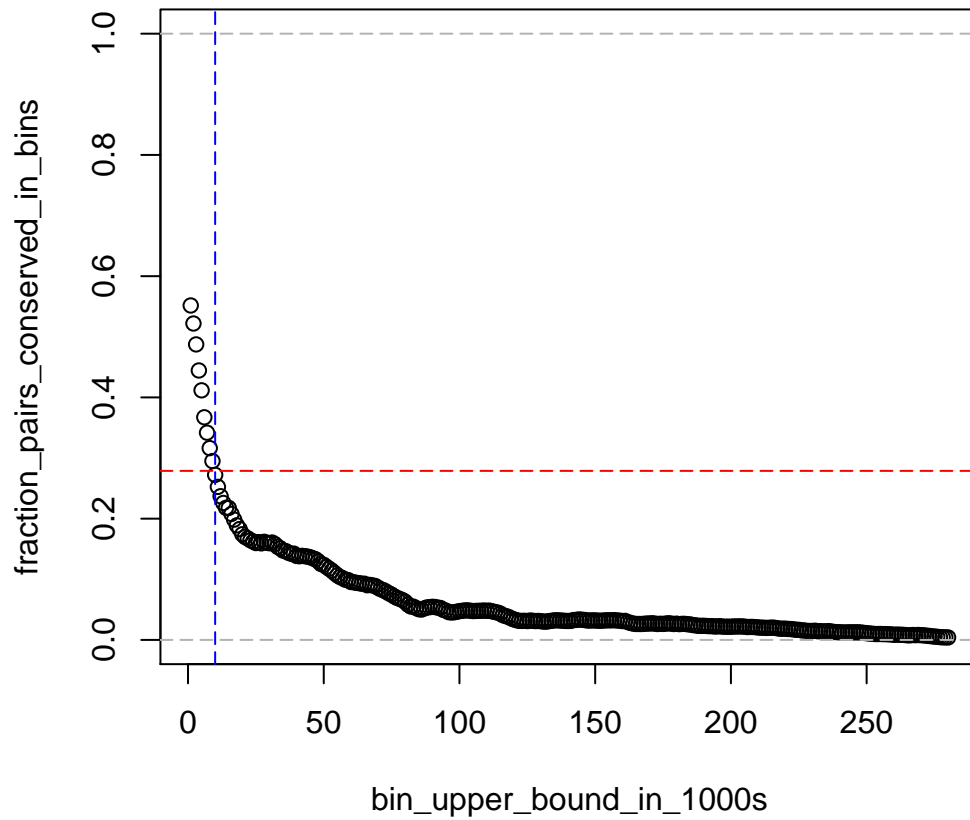

**Bin\_conservation\_minus\_bg\_Canal-1\_vs\_Fr5L**  
**PD-0.459824**

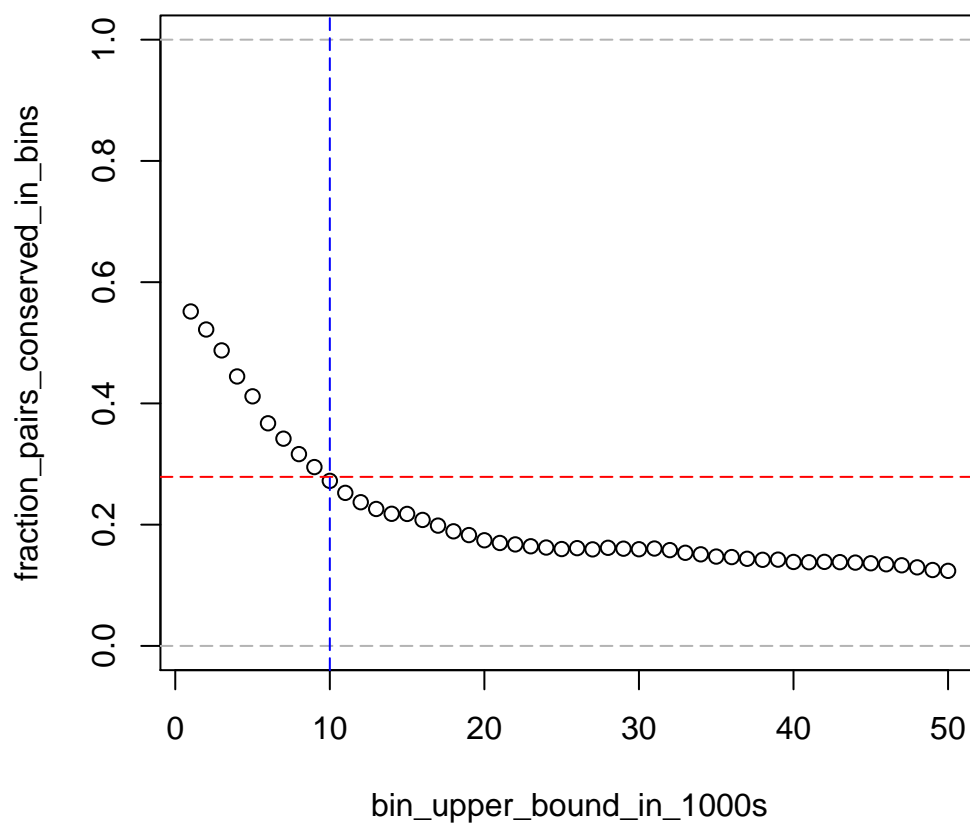

Supplement: s1 [file s1]

**Bin\_conservation\_minus\_bg\_NE-JV-1\_vs\_PBCV1**  
**PD-0.668549**

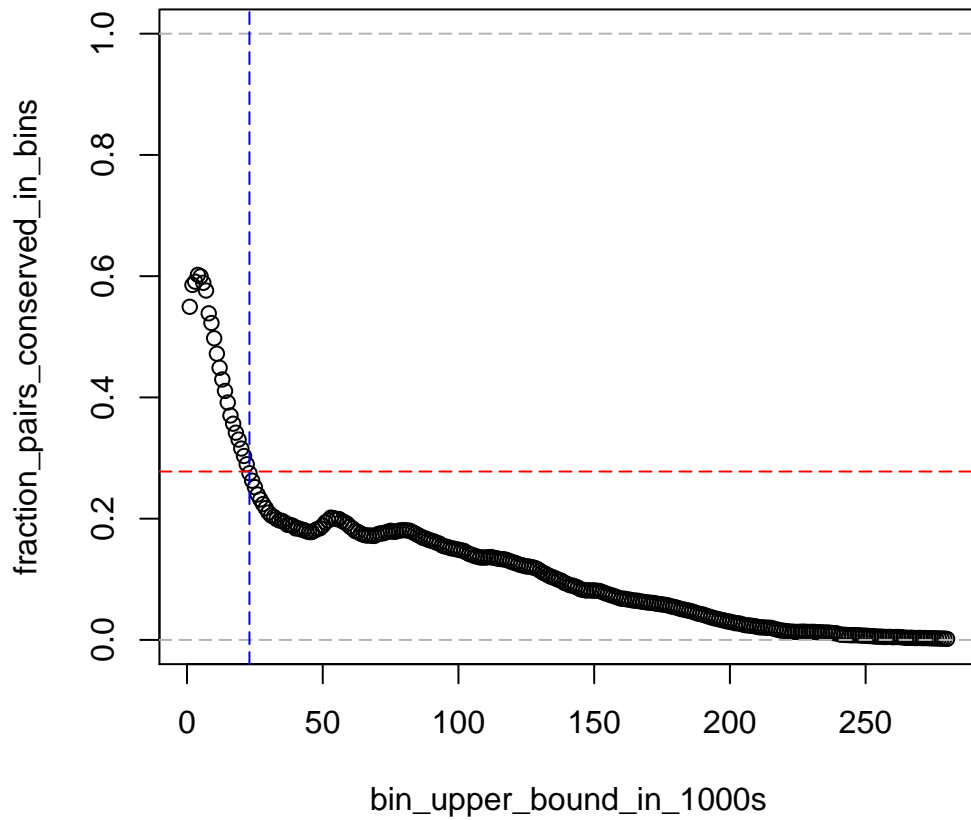

**Bin\_conservation\_minus\_bg\_NE-JV-1\_vs\_PBCV1**  
**PD-0.668549**

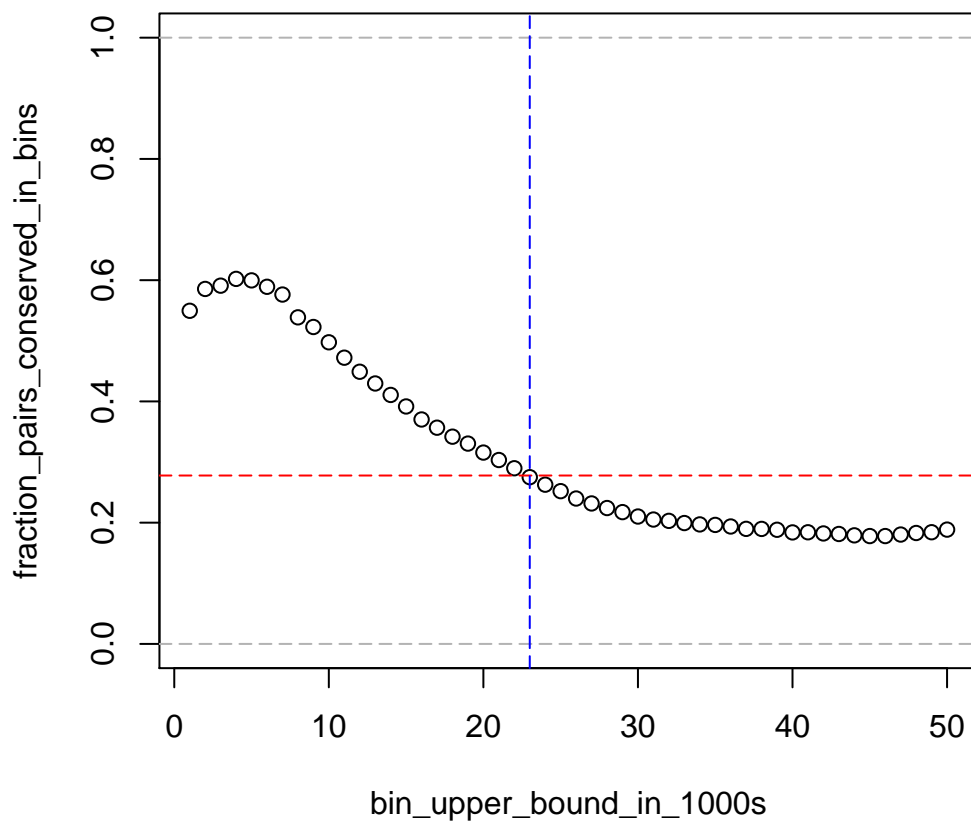

Supplement: s1 [file s1]

**Bin\_conservation\_minus\_bg\_IL-3A\_vs\_MO0605SPH**  
**PD-0.684699**

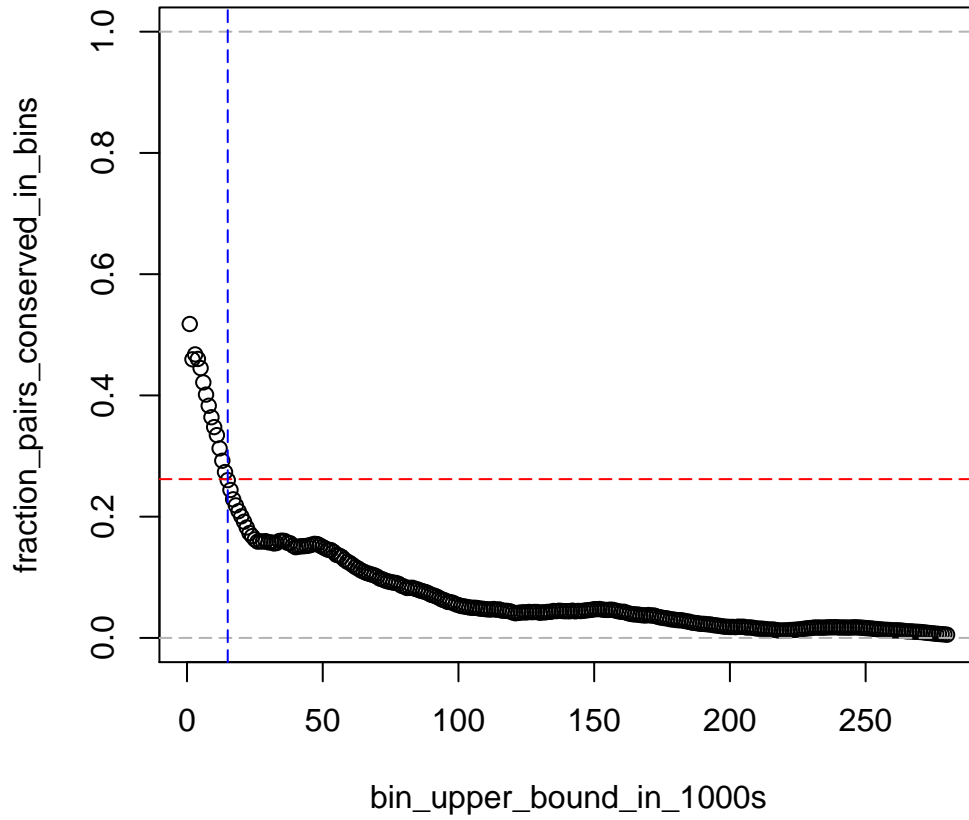

**Bin\_conservation\_minus\_bg\_IL-3A\_vs\_MO0605SPH**  
**PD-0.684699**

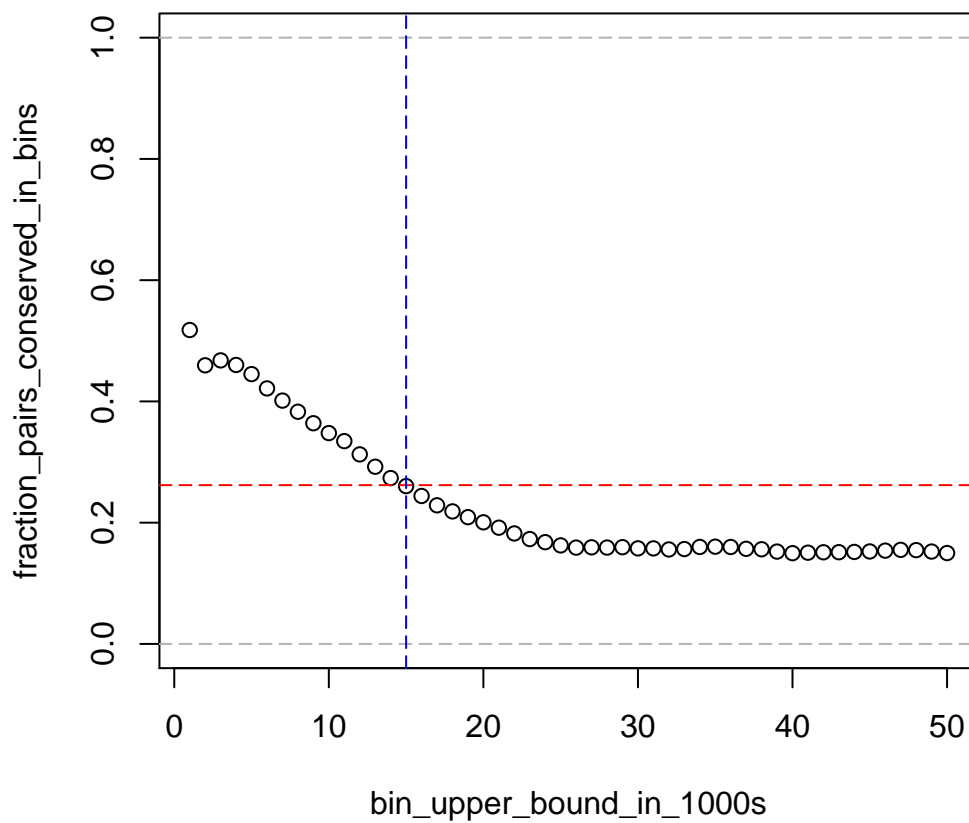

Supplement: s1 [file s1]

**Bin\_conservation\_minus\_bg\_CVR-1\_vs\_Fr5L**  
**PD-0.033403**

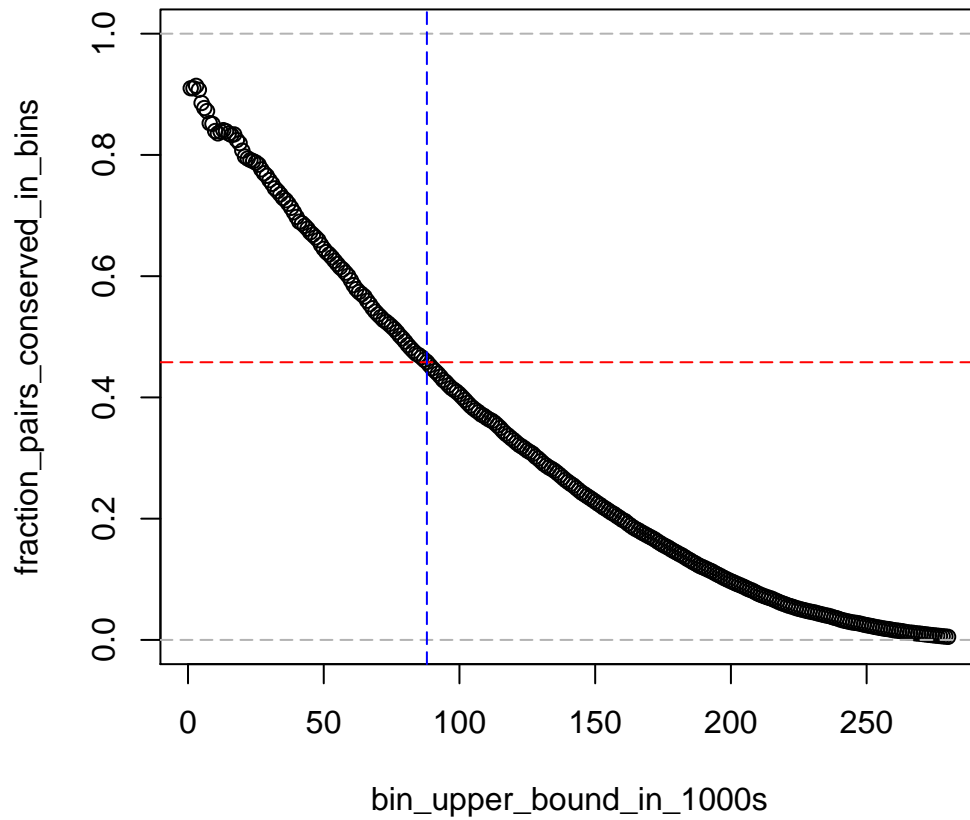

**Bin\_conservation\_minus\_bg\_CVR-1\_vs\_Fr5L**  
**PD-0.033403**

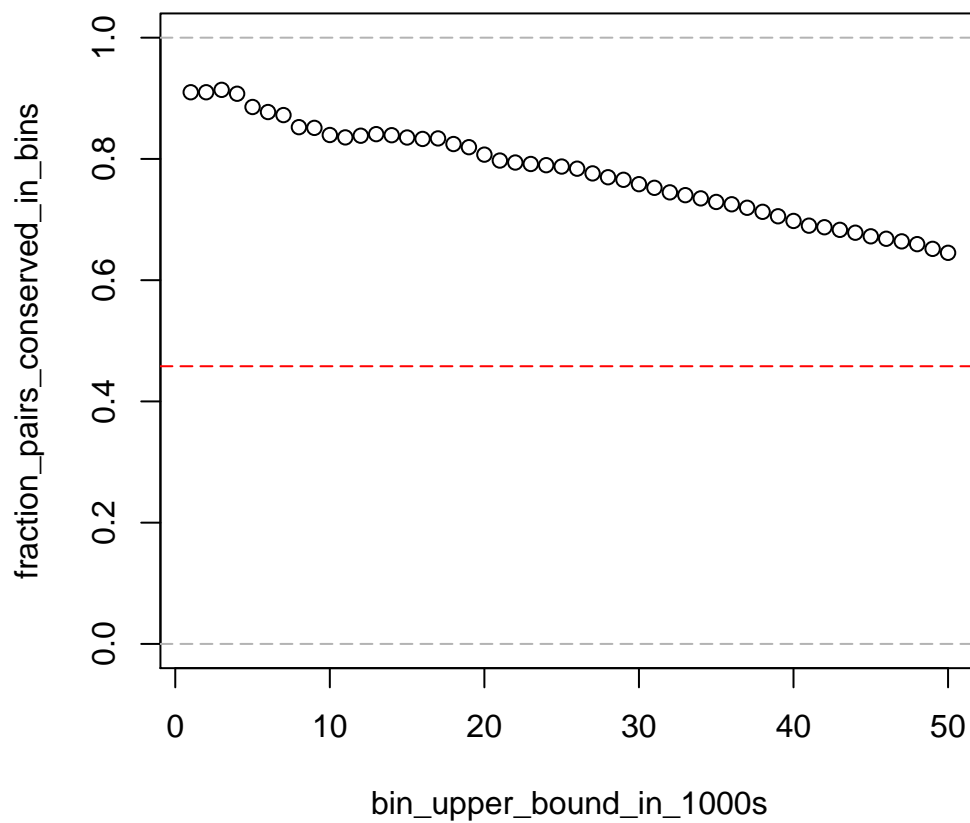

Supplement: s1 [file s1]

**Bin\_conservation\_minus\_bg\_AN69C\_vs\_WI0606**  
**PD-0.68223**

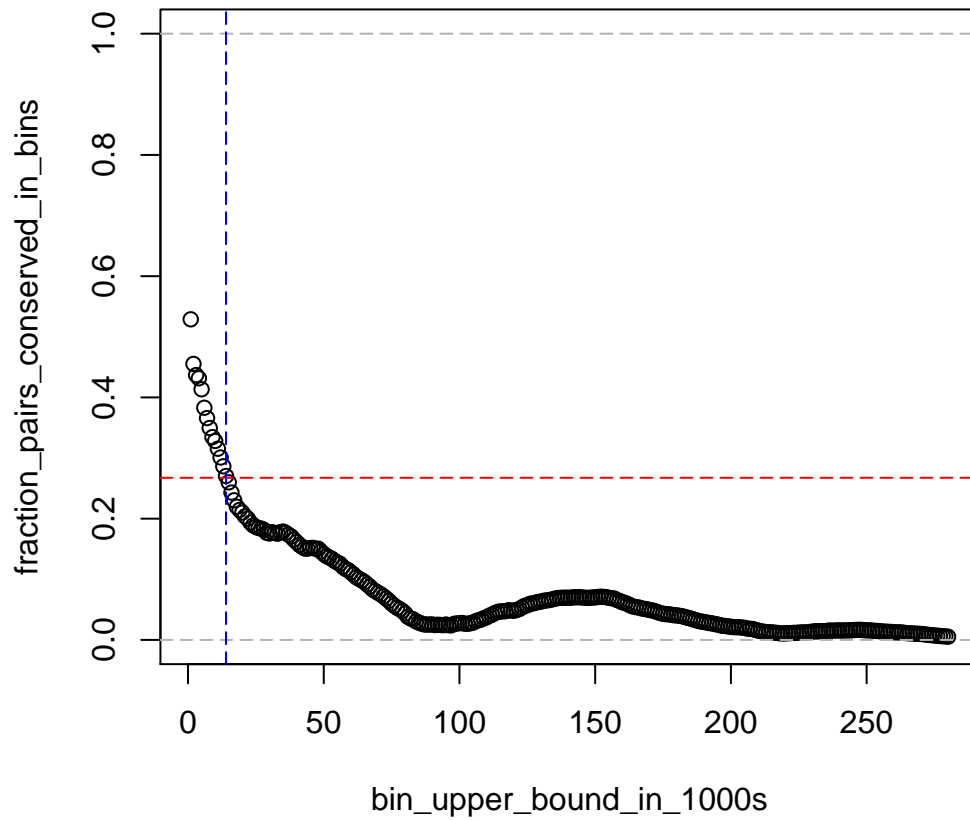

**Bin\_conservation\_minus\_bg\_AN69C\_vs\_WI0606**  
**PD-0.68223**

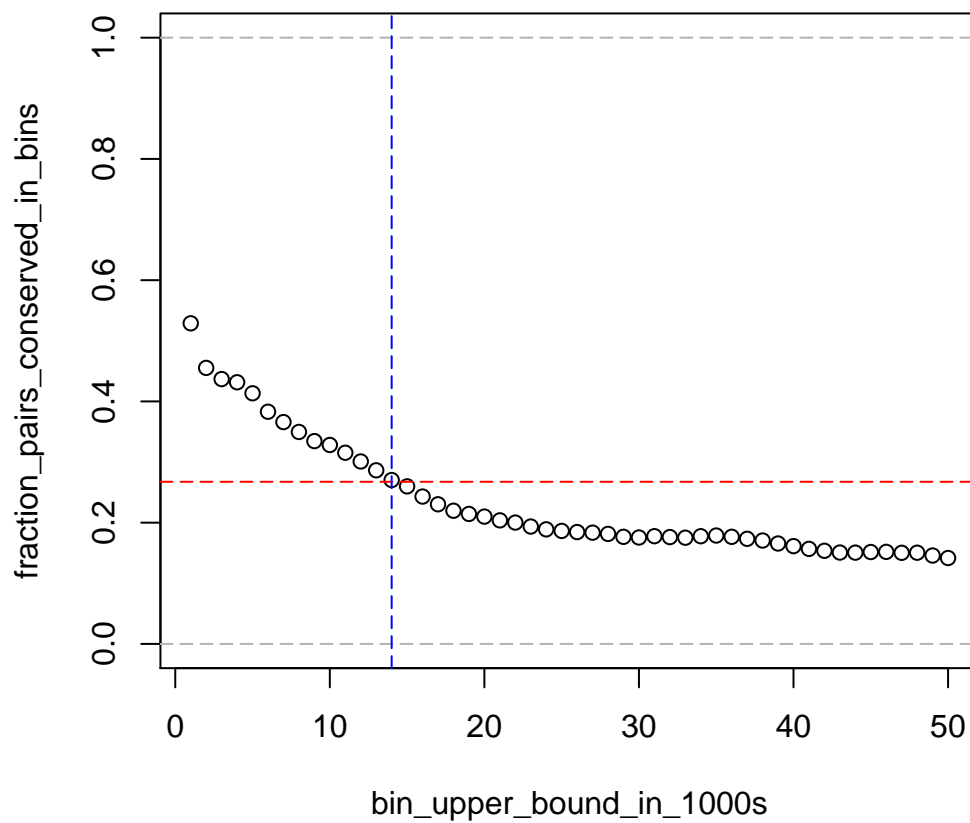

Supplement: s1 [file s1]

**Bin\_conservation\_minus\_bg\_ATCV1\_vs\_IL-3A**  
**PD-0.680538**

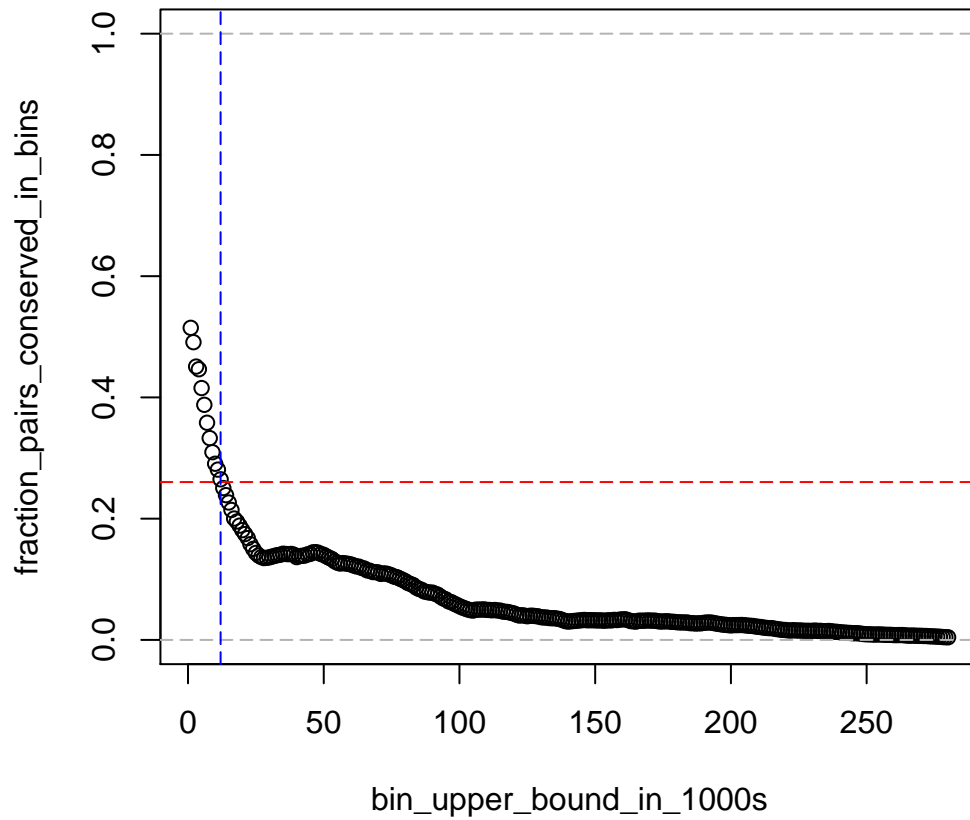

**Bin\_conservation\_minus\_bg\_ATCV1\_vs\_IL-3A**  
**PD-0.680538**

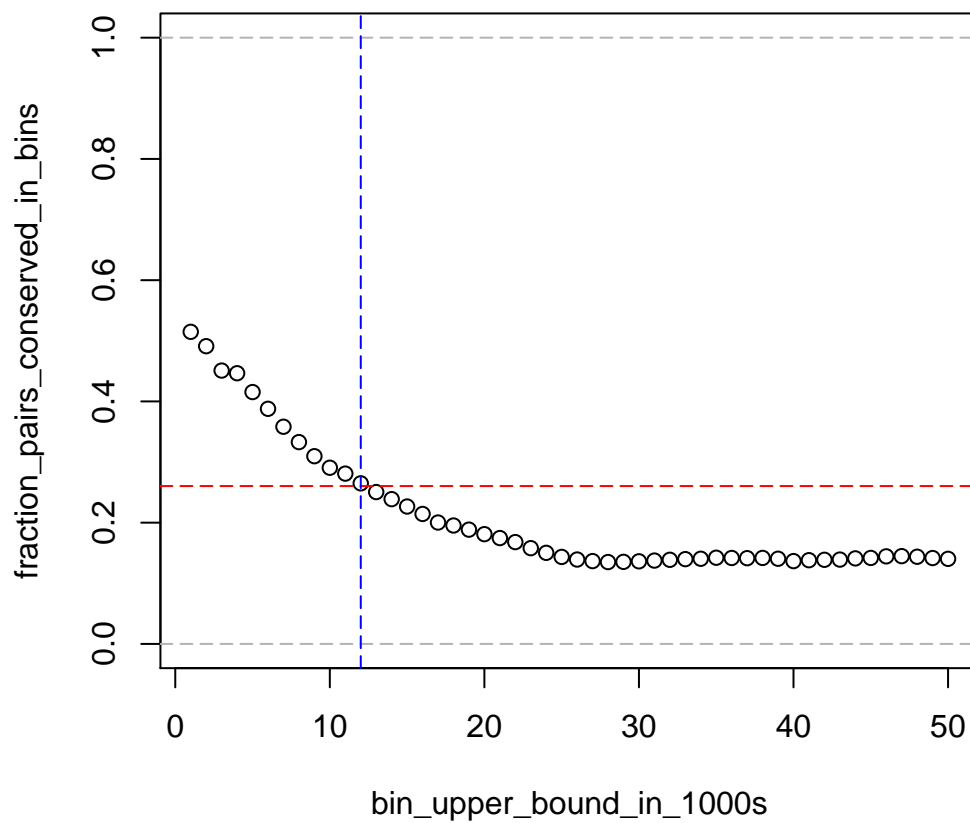

Supplement: s1 [file s1]

**Bin\_conservation\_minus\_bg\_MA-1D\_vs\_NY2A**  
**PD-0.049474**

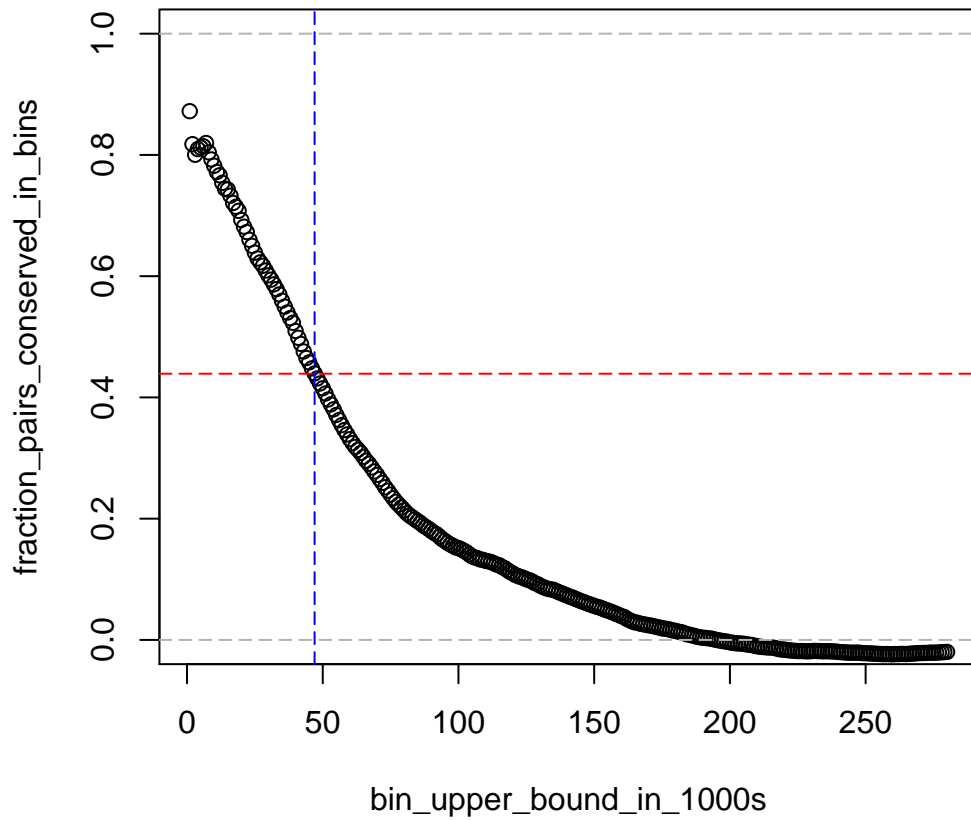

**Bin\_conservation\_minus\_bg\_MA-1D\_vs\_NY2A**  
**PD-0.049474**

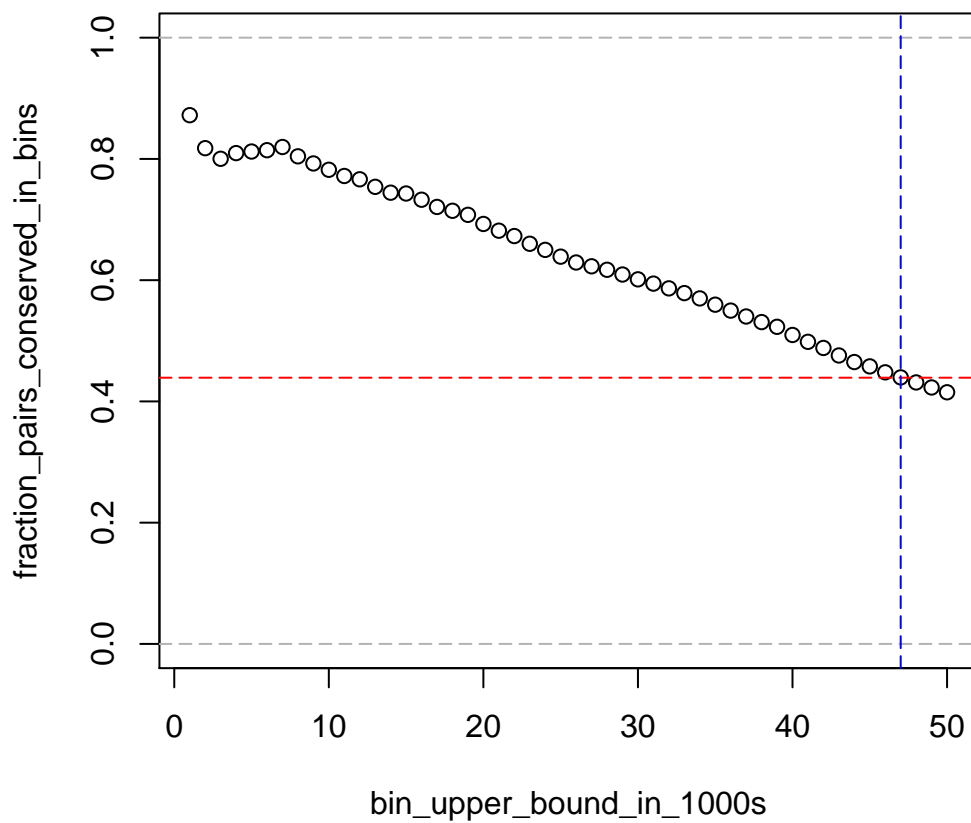

Supplement: s1 [file s1]

**Bin\_conservation\_minus\_bg\_AR158\_vs\_MT325**  
**PD-0.662345**

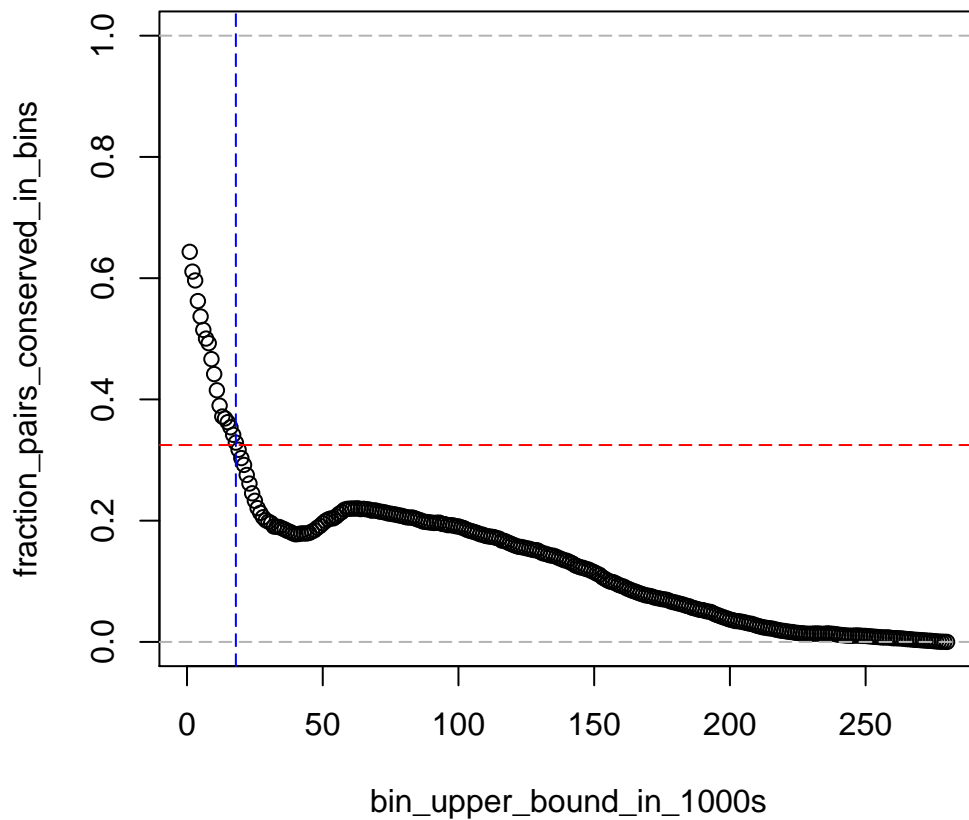

**Bin\_conservation\_minus\_bg\_AR158\_vs\_MT325**  
**PD-0.662345**

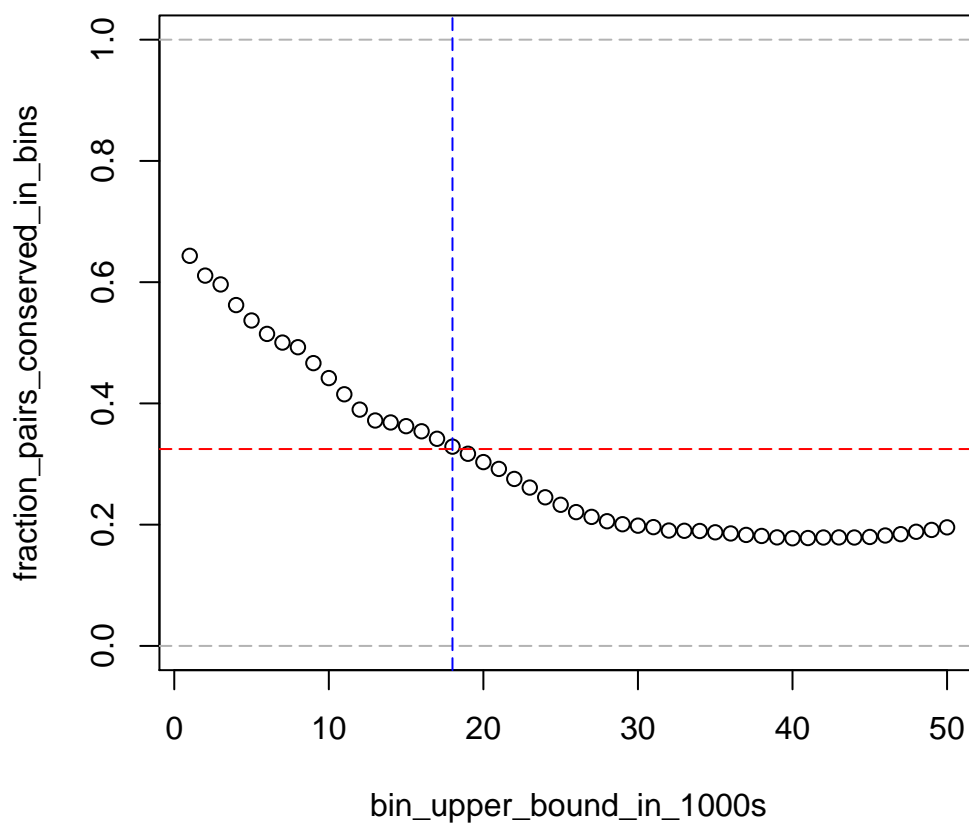

Supplement: s1 [file s1]

**Bin\_conservation\_minus\_bg\_AP110A\_vs\_Br0604L**  
**PD-0.451828**

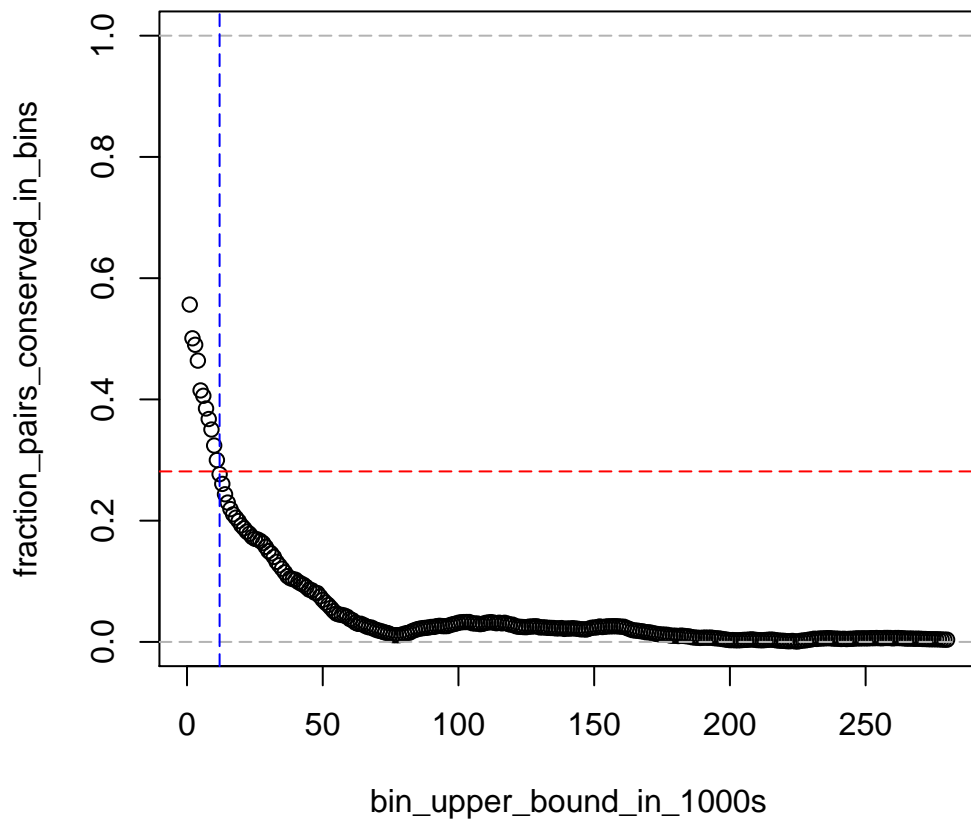

**Bin\_conservation\_minus\_bg\_AP110A\_vs\_Br0604L**  
**PD-0.451828**

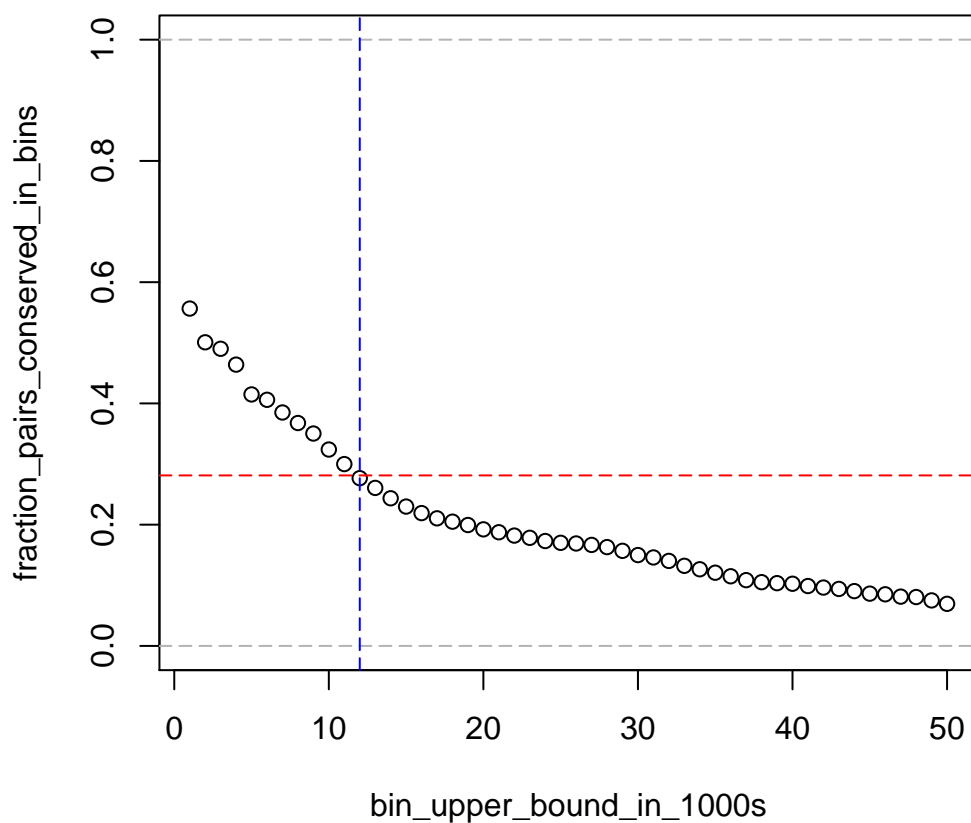

Supplement: s1 [file s1]

**Bin\_conservation\_minus\_bg\_Can18-4\_vs\_CvsA1**  
**PD-0.662301**

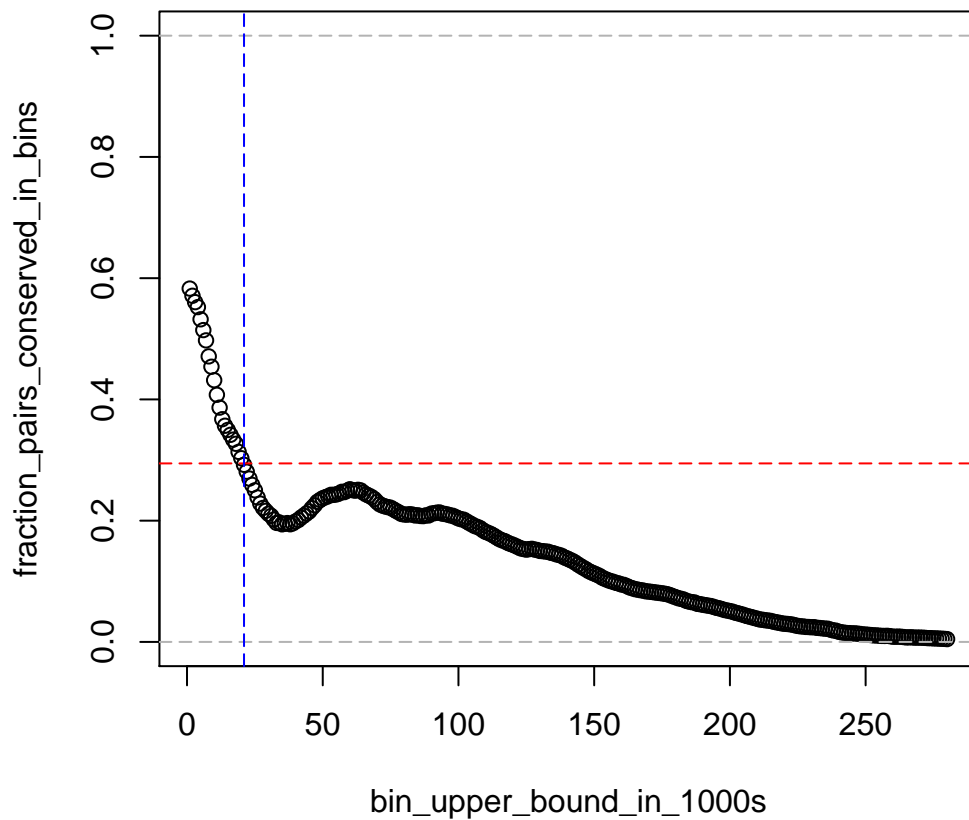

**Bin\_conservation\_minus\_bg\_Can18-4\_vs\_CvsA1**  
**PD-0.662301**

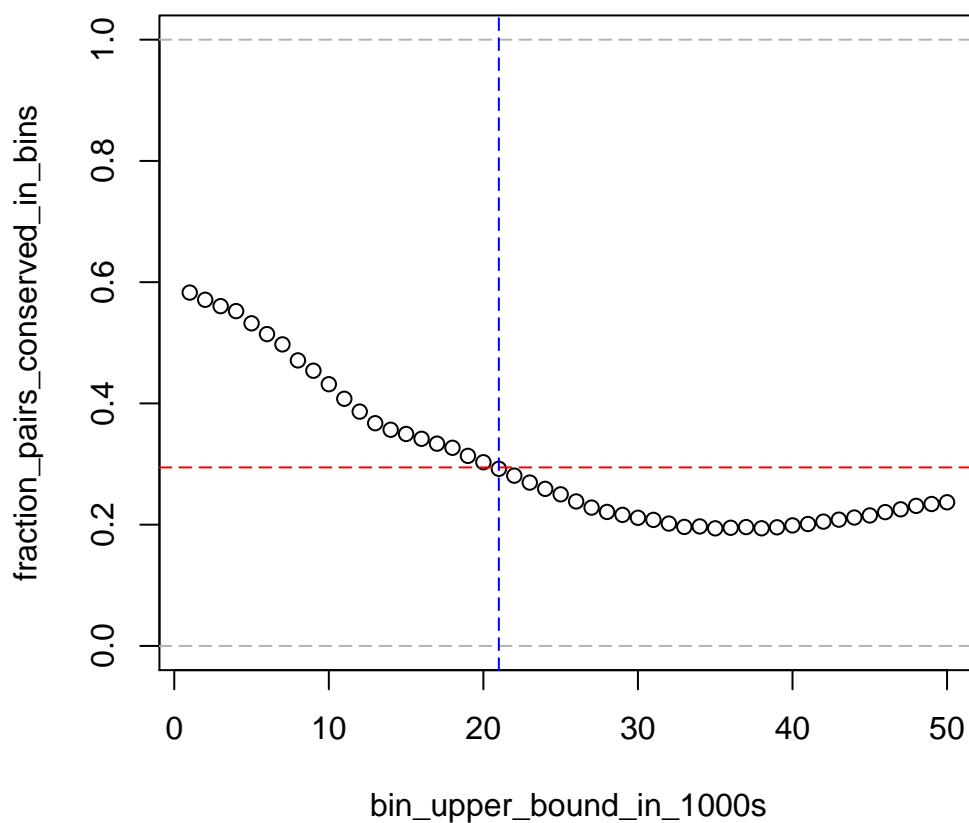

Supplement: s1 [file s1]

**Bin\_conservation\_minus\_bg\_Fr5L\_vs\_NE-JV-4**  
**PD-0.638784**

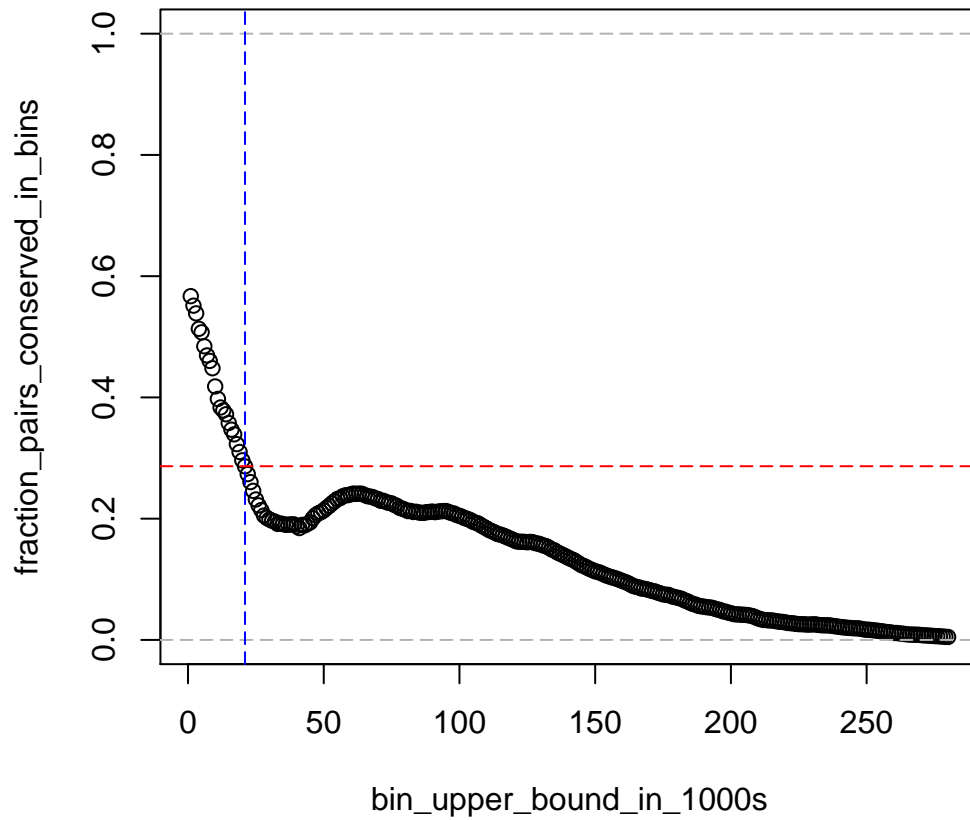

**Bin\_conservation\_minus\_bg\_Fr5L\_vs\_NE-JV-4**  
**PD-0.638784**

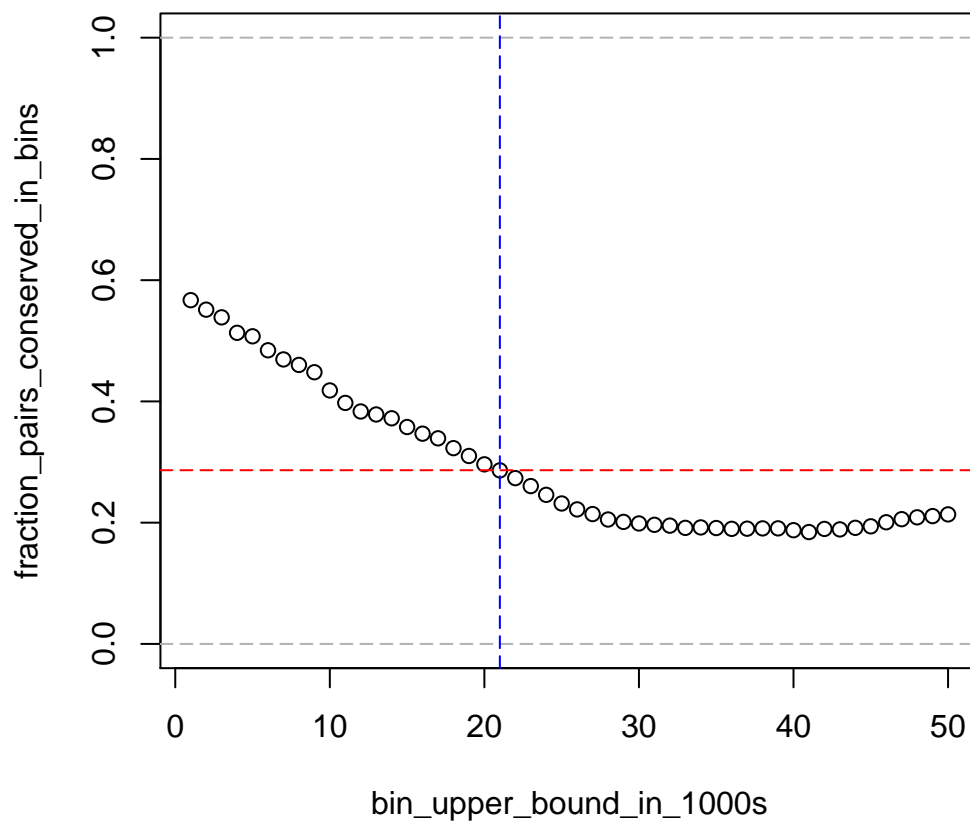

Supplement: s1 [file s1]

**Bin\_conservation\_minus\_bg\_NE-JV-3\_vs\_NY2A**  
**PD-0.710495**

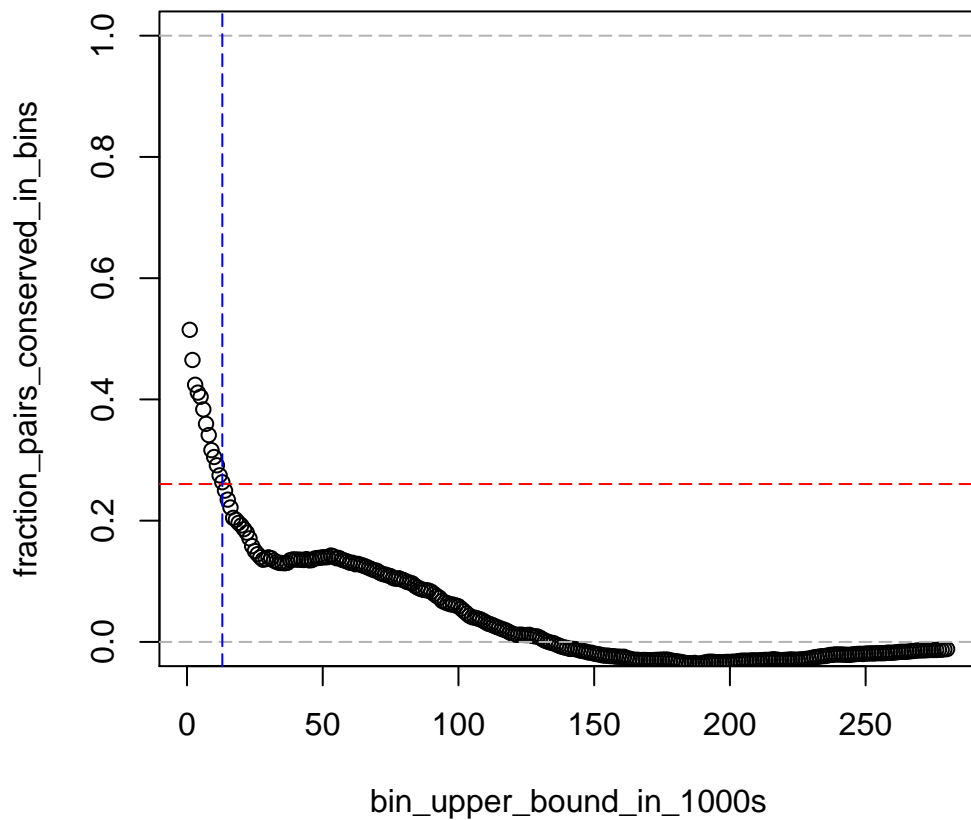

**Bin\_conservation\_minus\_bg\_NE-JV-3\_vs\_NY2A**  
**PD-0.710495**

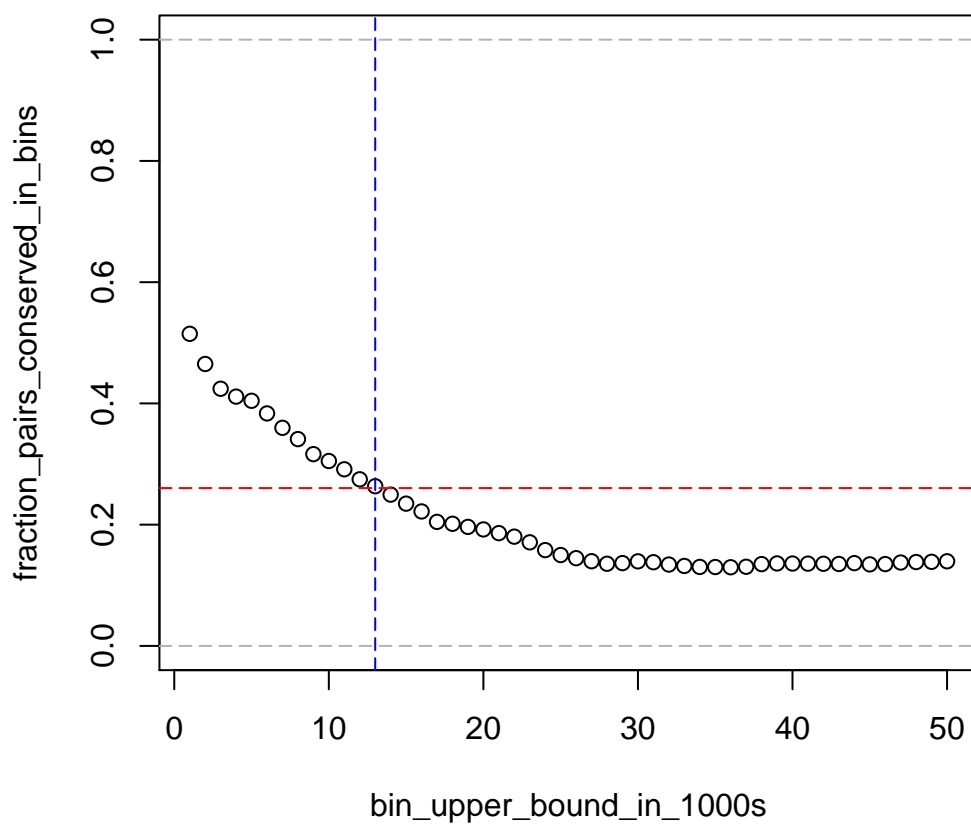

Supplement: s1 [file s1]

**Bin\_conservation\_minus\_bg\_MA-1D\_vs\_MN0810.1**  
**PD-0.698579**

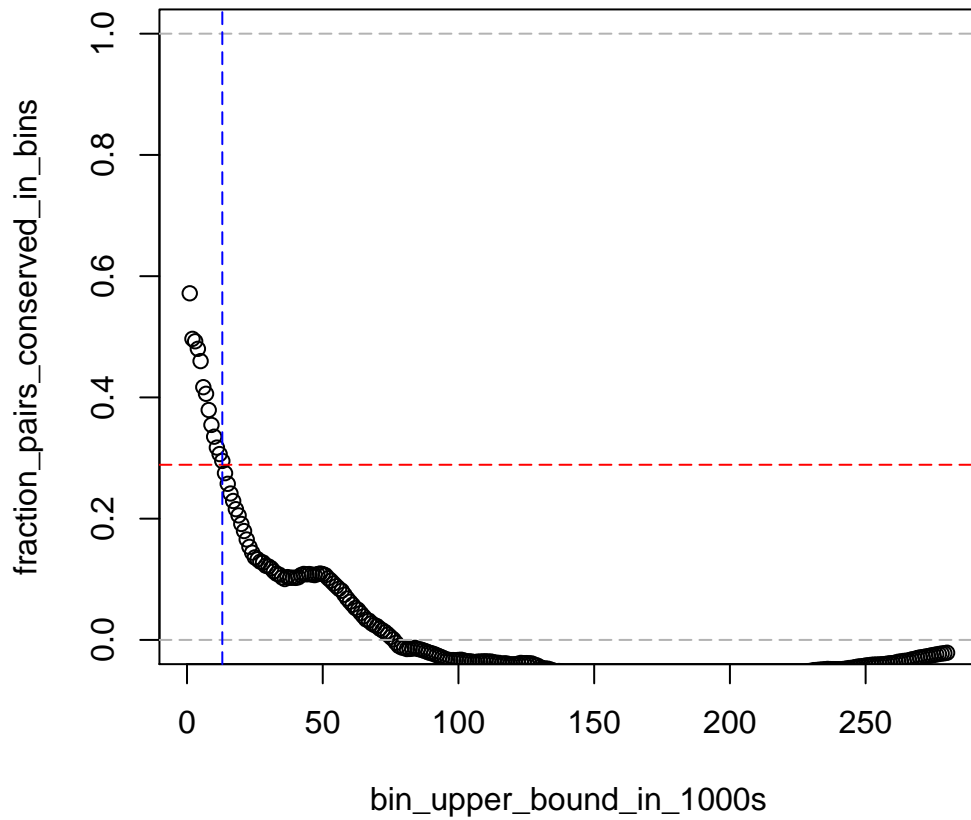

**Bin\_conservation\_minus\_bg\_MA-1D\_vs\_MN0810.1**  
**PD-0.698579**

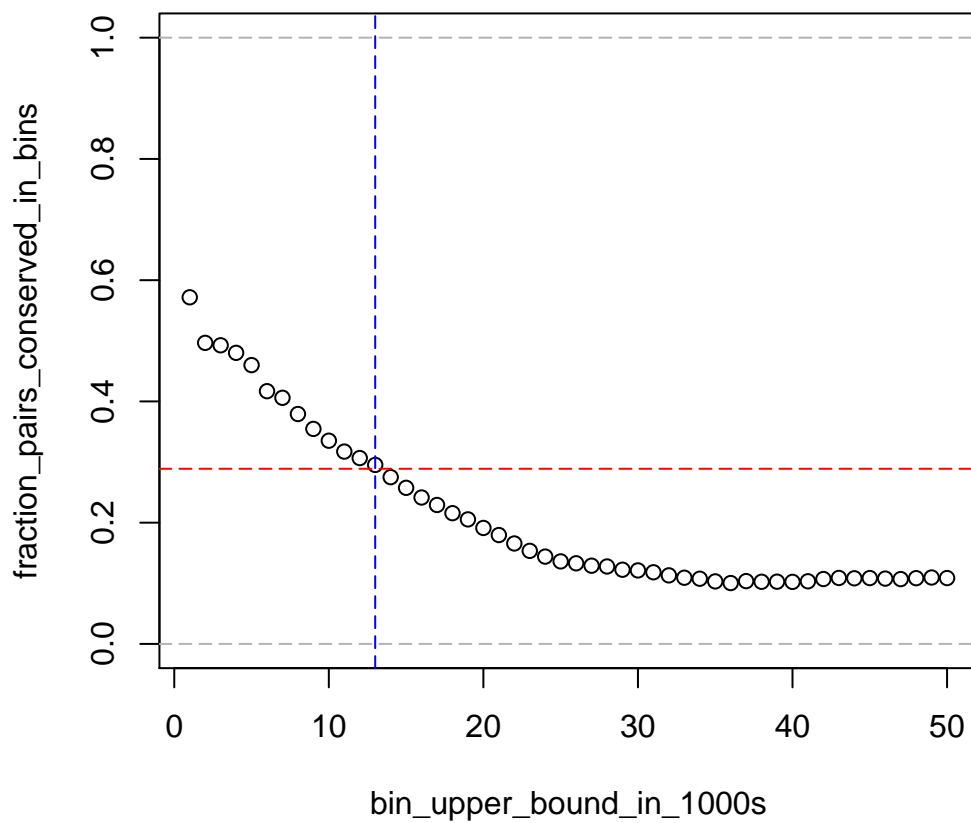

Supplement: s1 [file s1]

**Bin\_conservation\_minus\_bg\_KS1B\_vs\_MT325**  
**PD-0.650318**

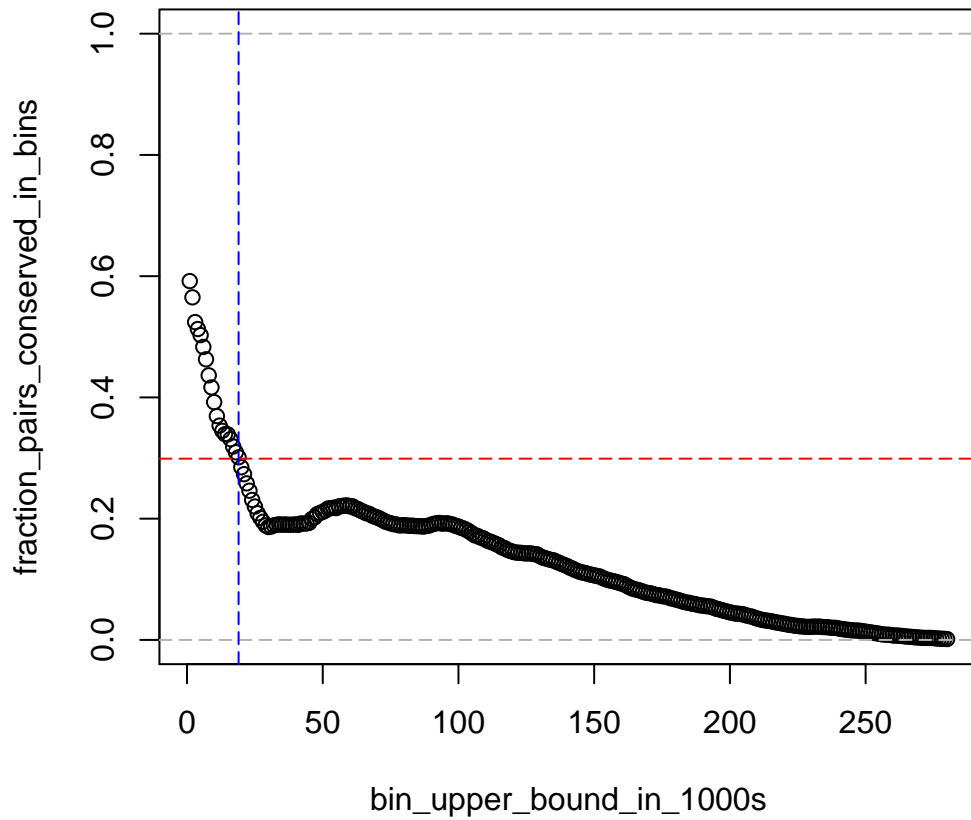

**Bin\_conservation\_minus\_bg\_KS1B\_vs\_MT325**  
**PD-0.650318**

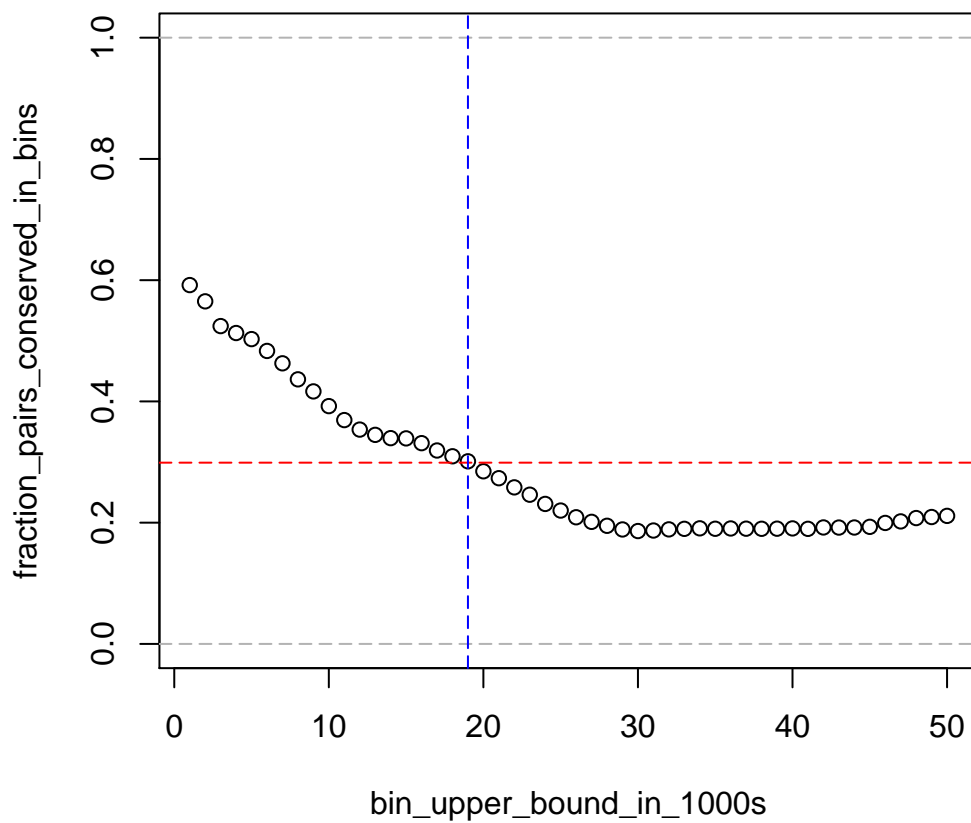

Supplement: s1 [file s1]

**Bin\_conservation\_minus\_bg\_CVR-1\_vs\_NY-2B**  
**PD-0.660874**

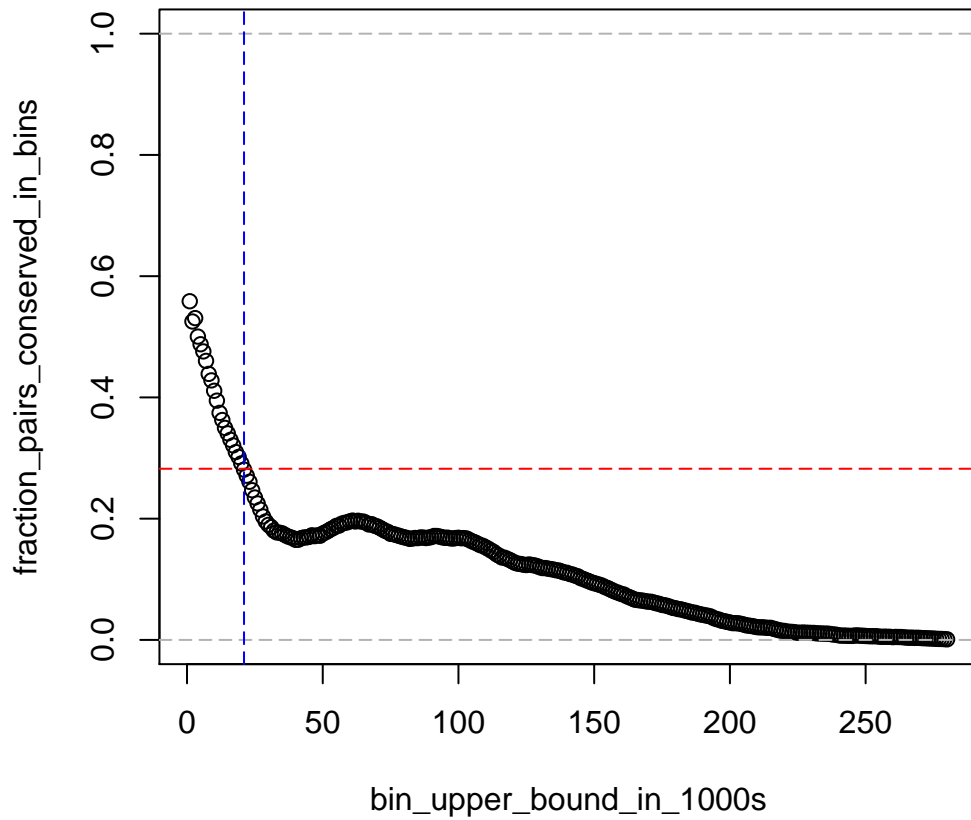

**Bin\_conservation\_minus\_bg\_CVR-1\_vs\_NY-2B**  
**PD-0.660874**

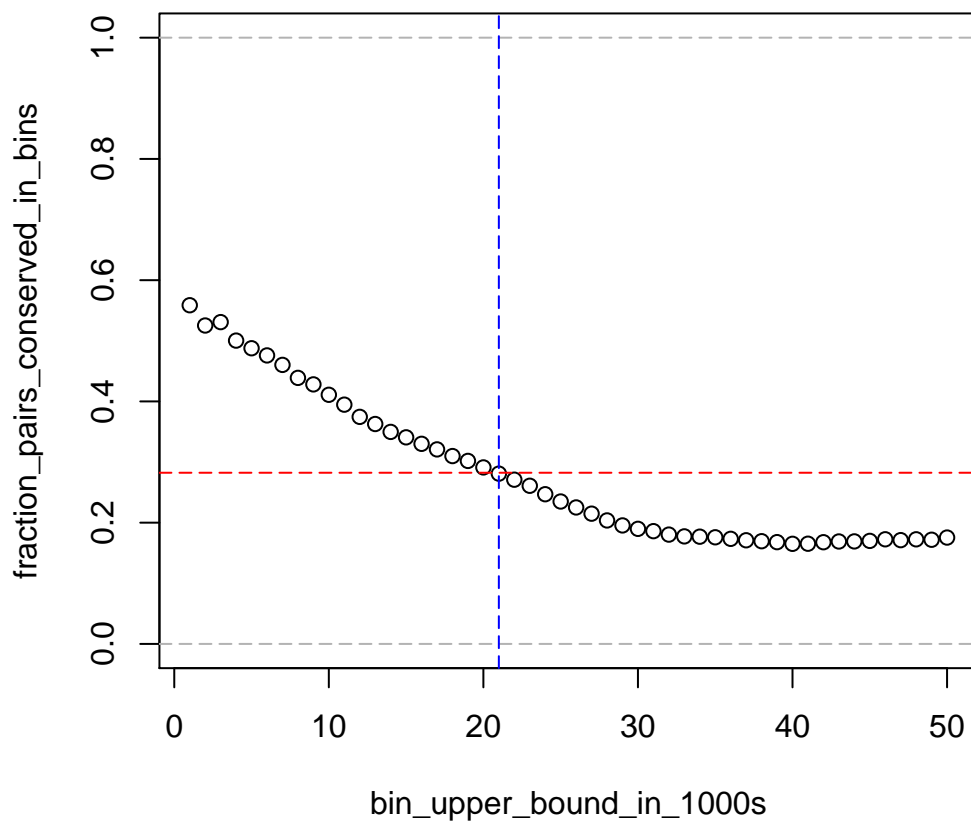

Supplement: s1 [file s1]

**Bin\_conservation\_minus\_bg\_CvsA1\_vs\_Fr5L**  
**PD-0.65175**

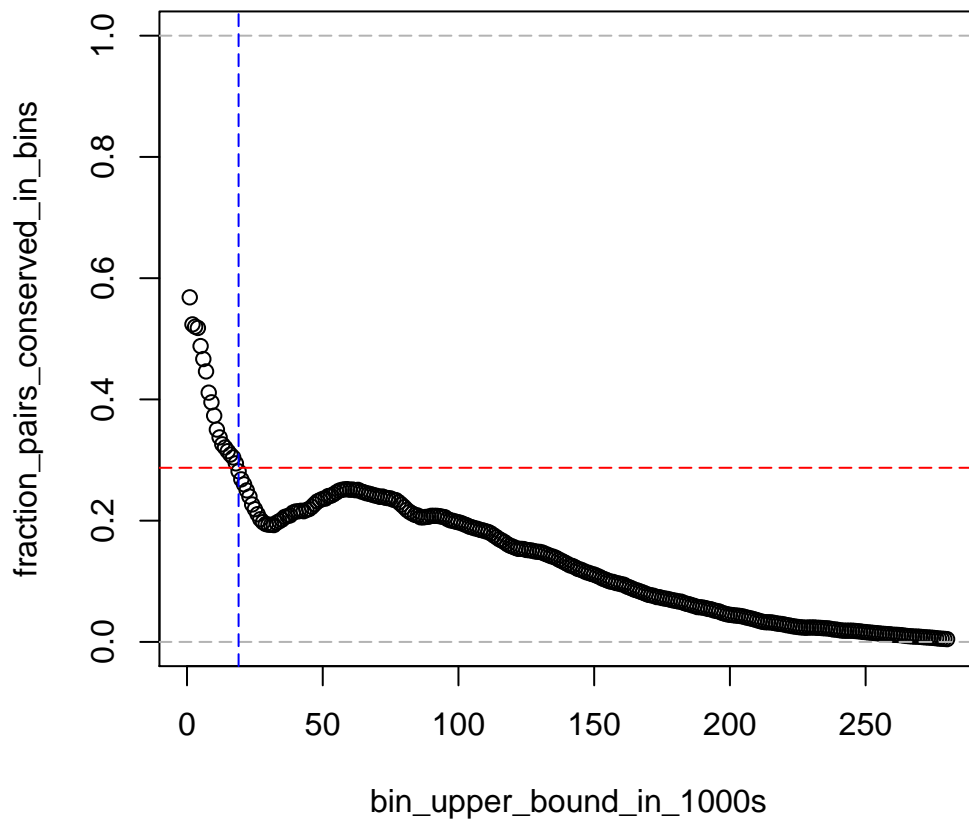

**Bin\_conservation\_minus\_bg\_CvsA1\_vs\_Fr5L**  
**PD-0.65175**

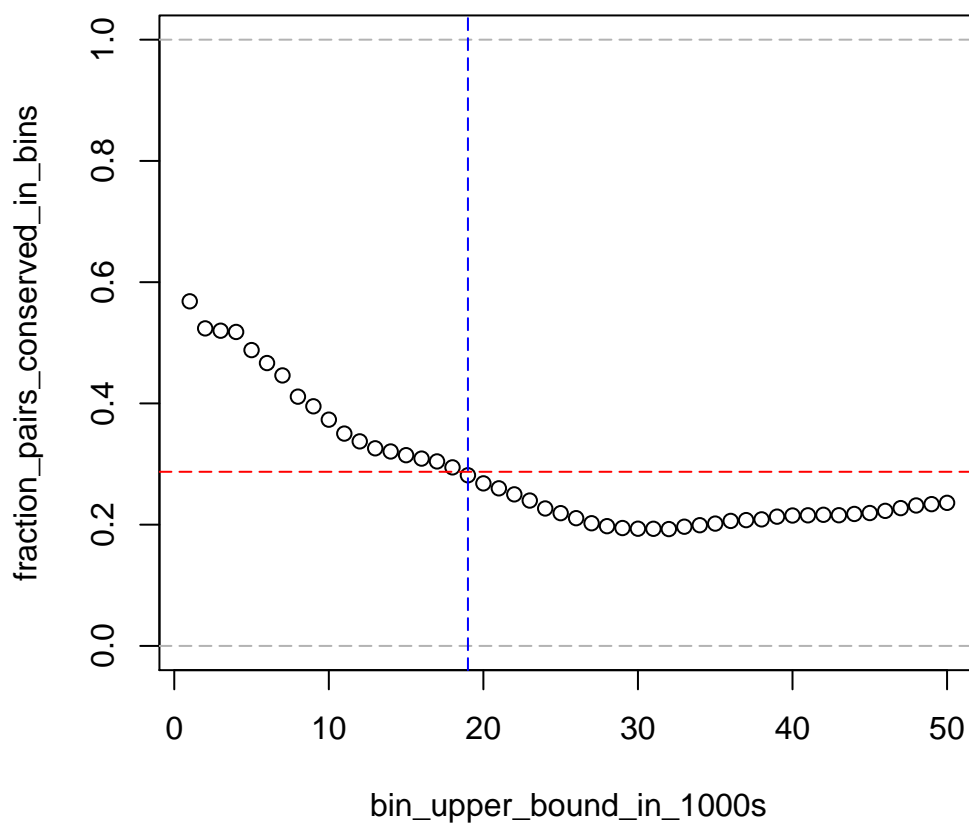

Supplement: s1 [file s1]

**Bin\_conservation\_minus\_bg\_Br0604L\_vs\_MA-1E**  
**PD-0.683948**

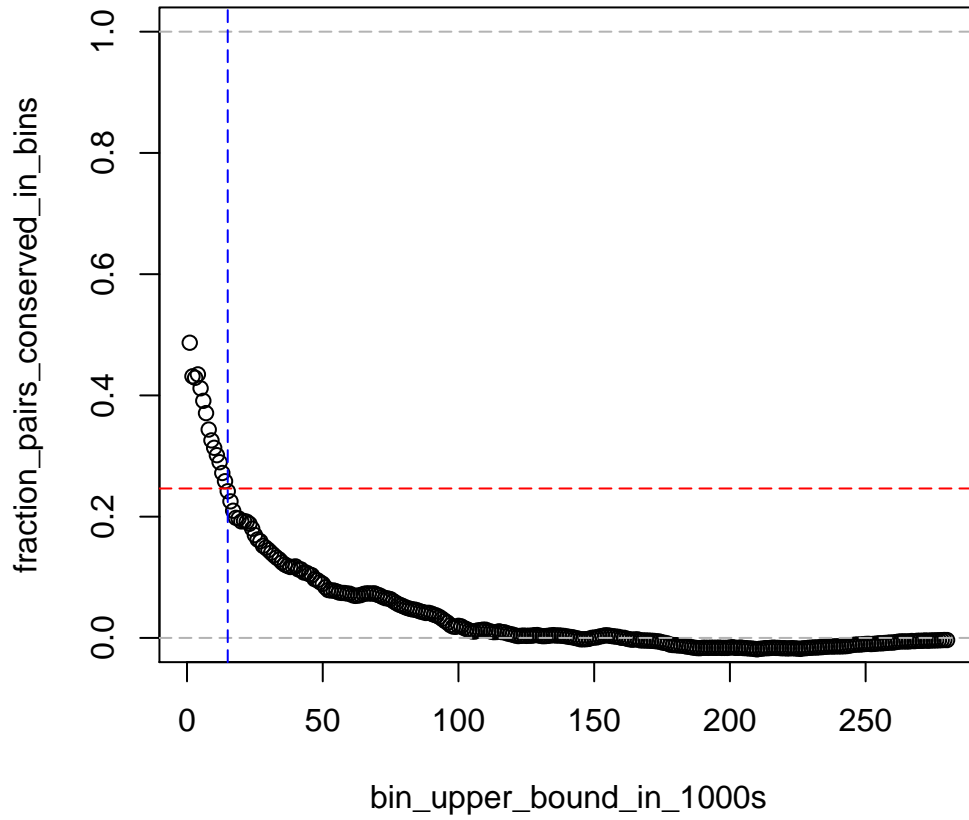

**Bin\_conservation\_minus\_bg\_Br0604L\_vs\_MA-1E**  
**PD-0.683948**

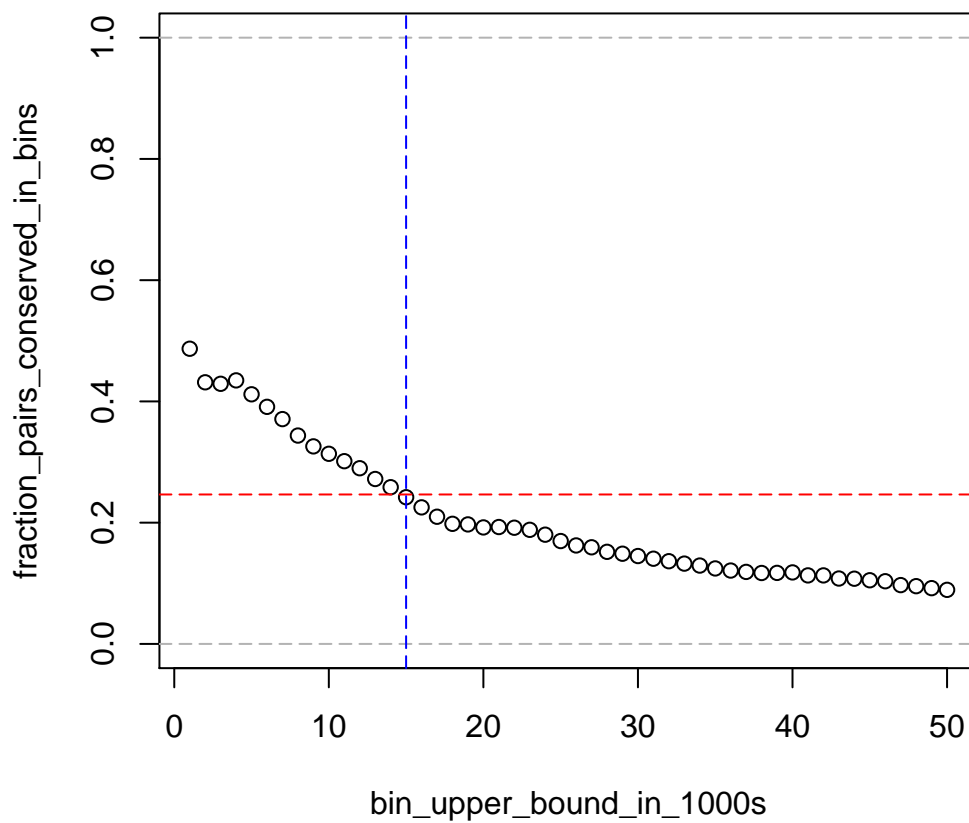

Supplement: s1 [file s1]

**Bin\_conservation\_minus\_bg\_CviKI\_vs\_WI0606**  
**PD-0.697592**

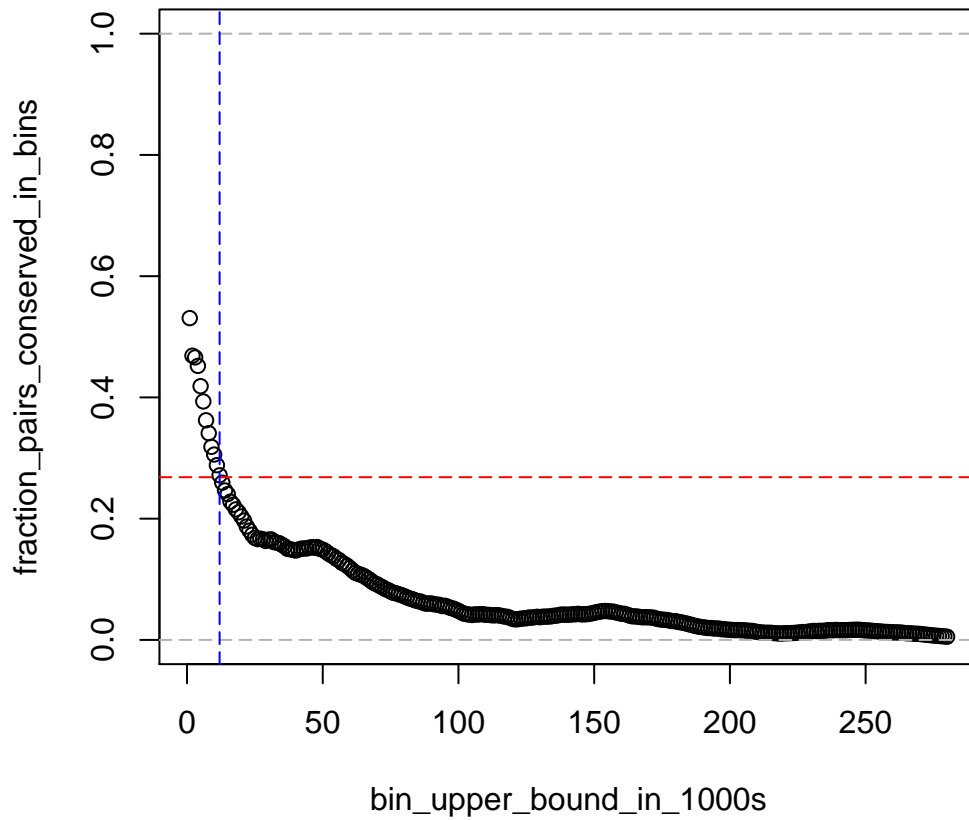

**Bin\_conservation\_minus\_bg\_CviKI\_vs\_WI0606**  
**PD-0.697592**

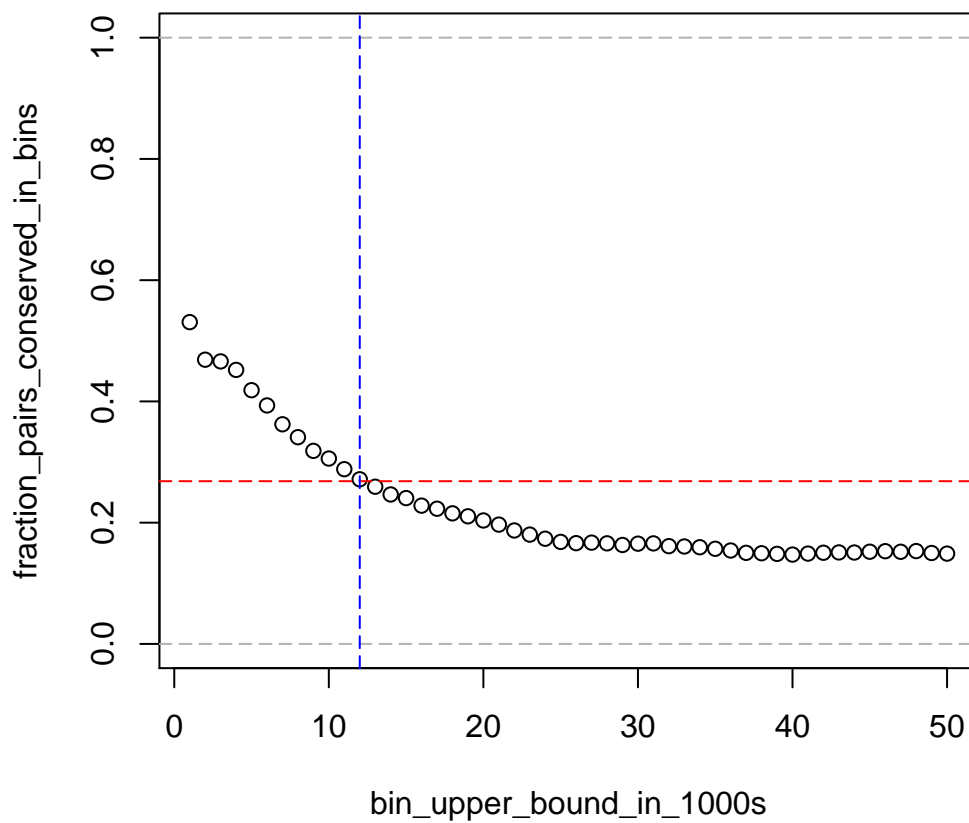

Supplement: s1 [file s1]

**Bin\_conservation\_minus\_bg\_AN69C\_vs\_NYs-1**  
**PD-0.131542**

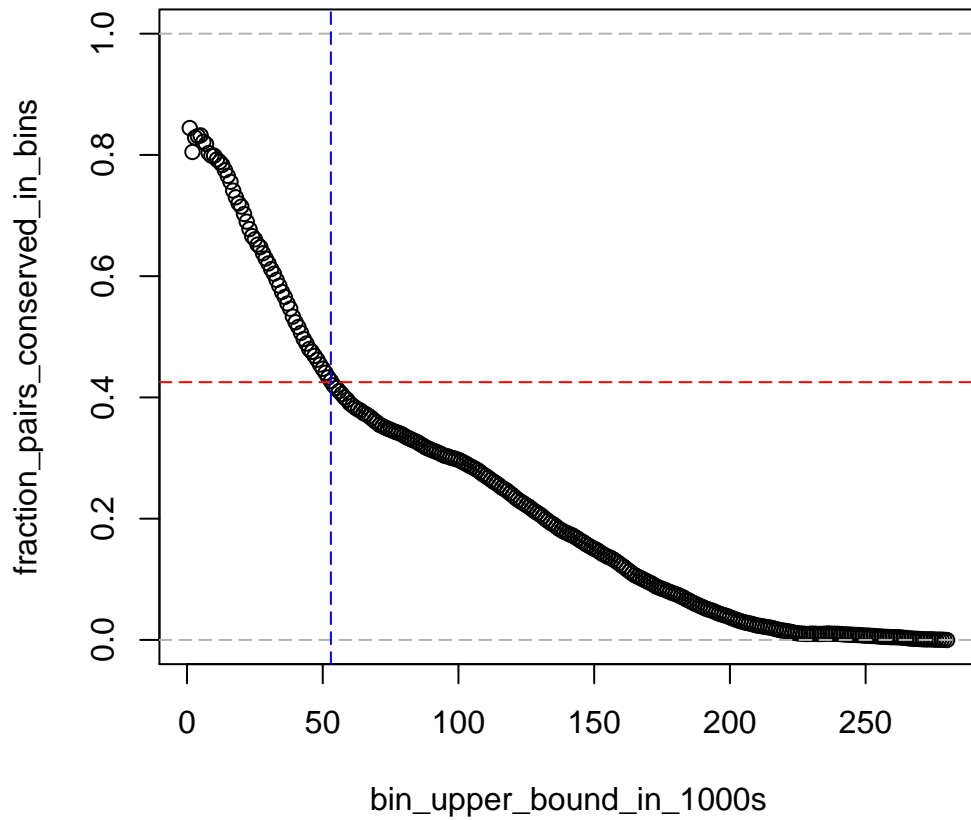

**Bin\_conservation\_minus\_bg\_AN69C\_vs\_NYs-1**  
**PD-0.131542**

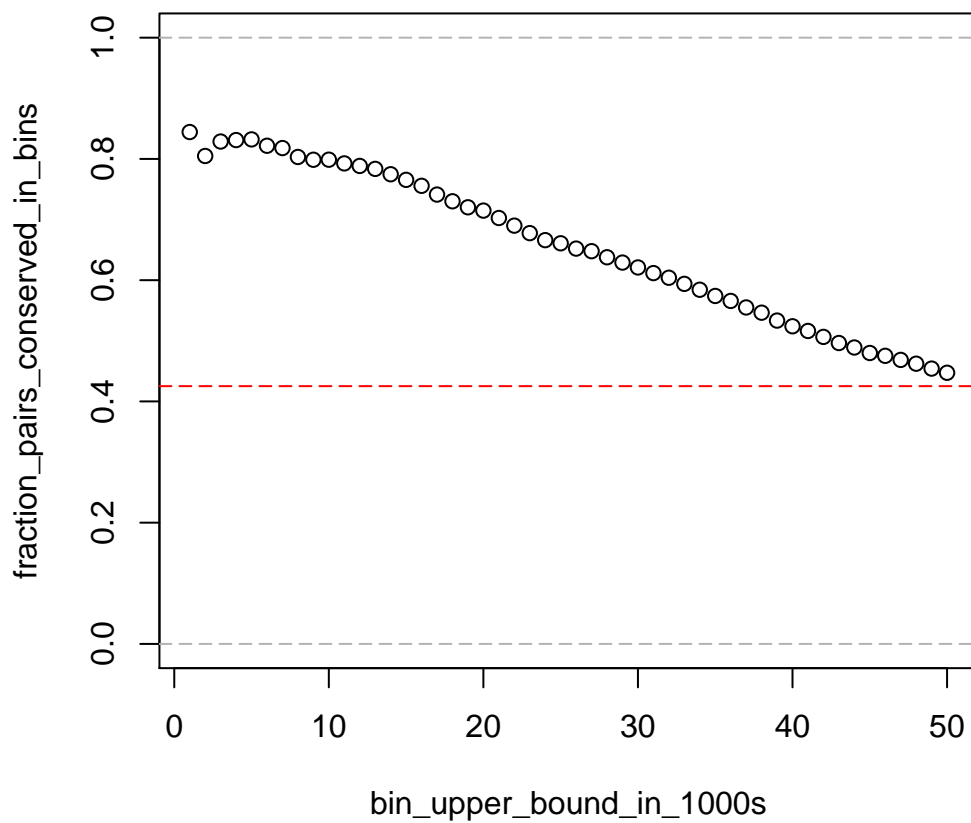

Supplement: s1 [file s1]

**Bin\_conservation\_minus\_bg\_CZ-2\_vs\_MA-1D**  
**PD-0.663772**

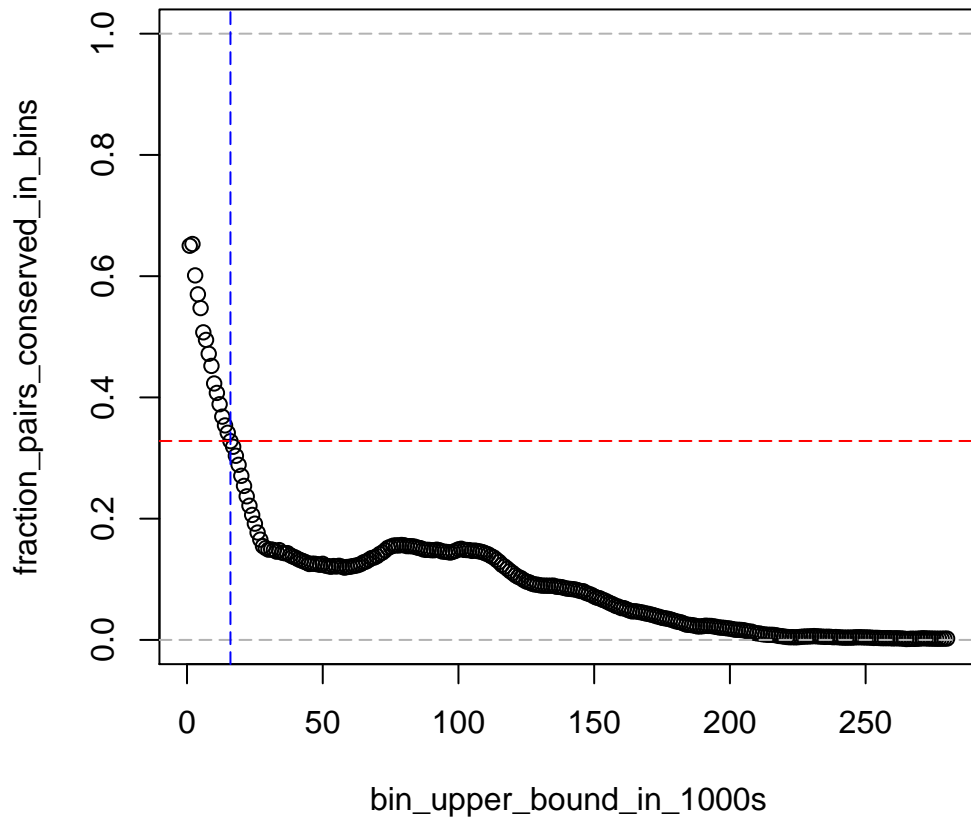

**Bin\_conservation\_minus\_bg\_CZ-2\_vs\_MA-1D**  
**PD-0.663772**

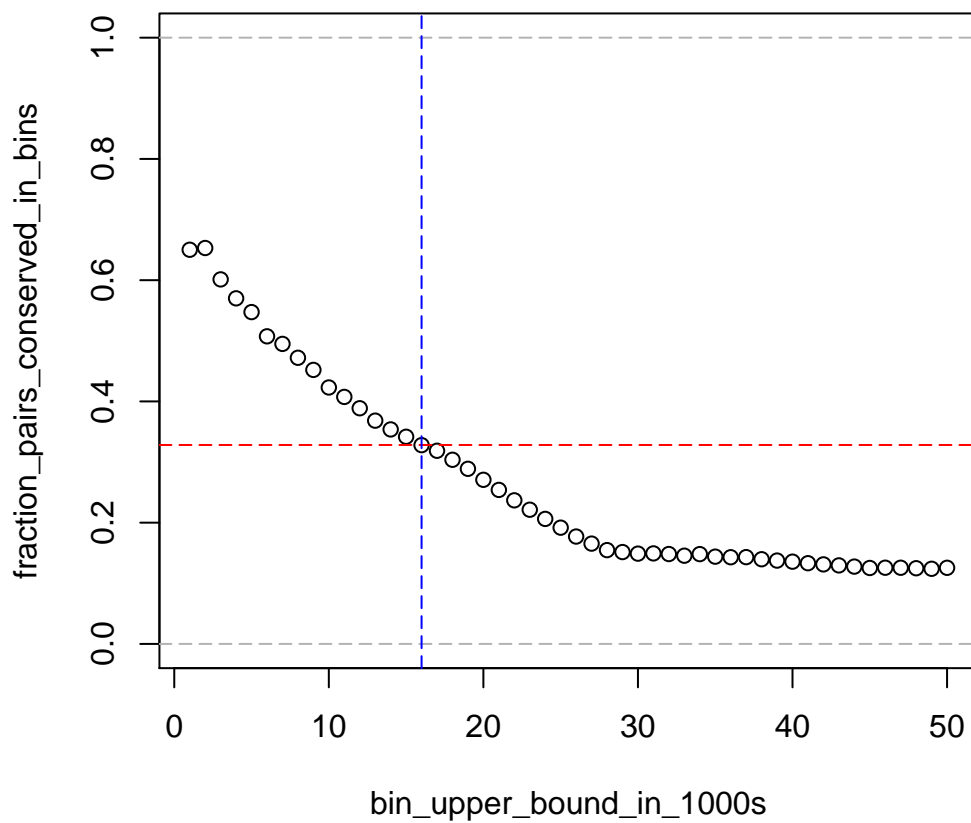

Supplement: s1 [file s1]

**Bin\_conservation\_minus\_bg\_MT325\_vs\_NTS-1**  
**PD-0.453991**

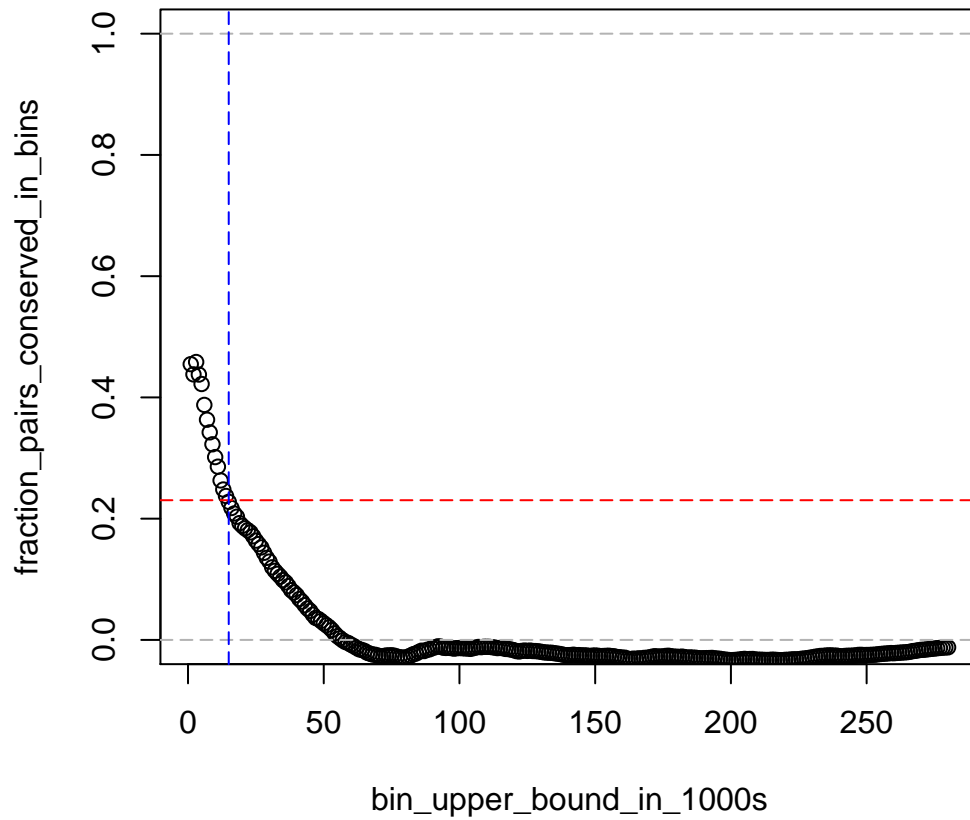

**Bin\_conservation\_minus\_bg\_MT325\_vs\_NTS-1**  
**PD-0.453991**

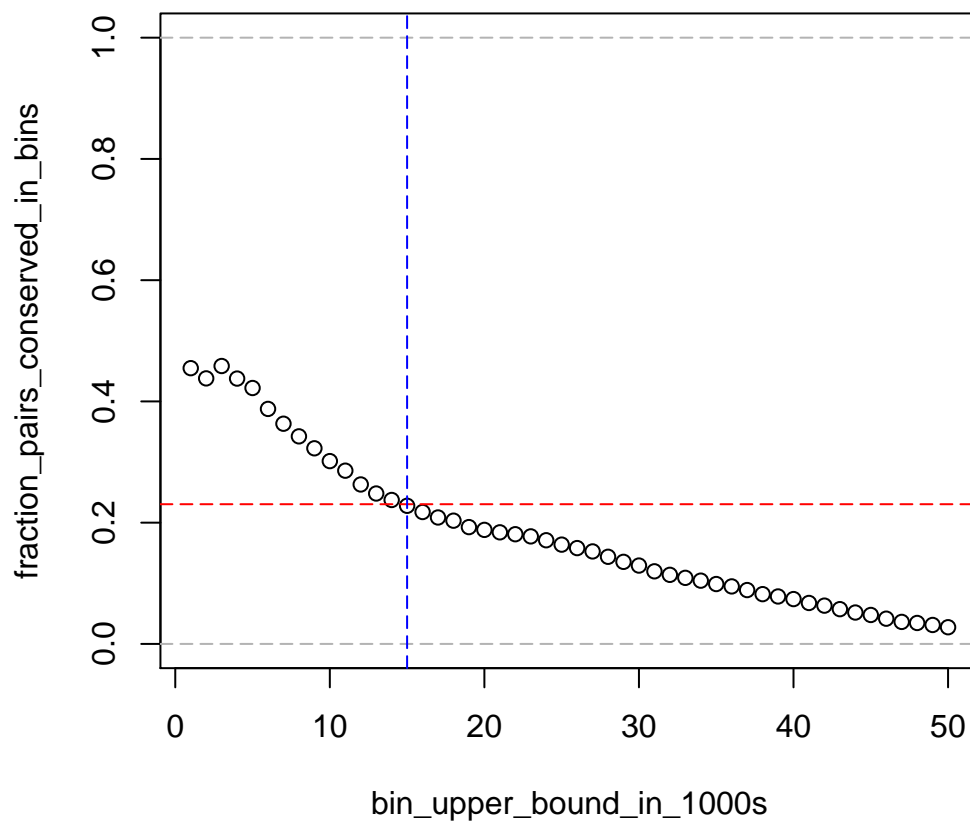

Supplement: s1 [file s1]

**Bin\_conservation\_minus\_bg\_AP110A\_vs\_NE-JV-2**  
**PD-0.462499**

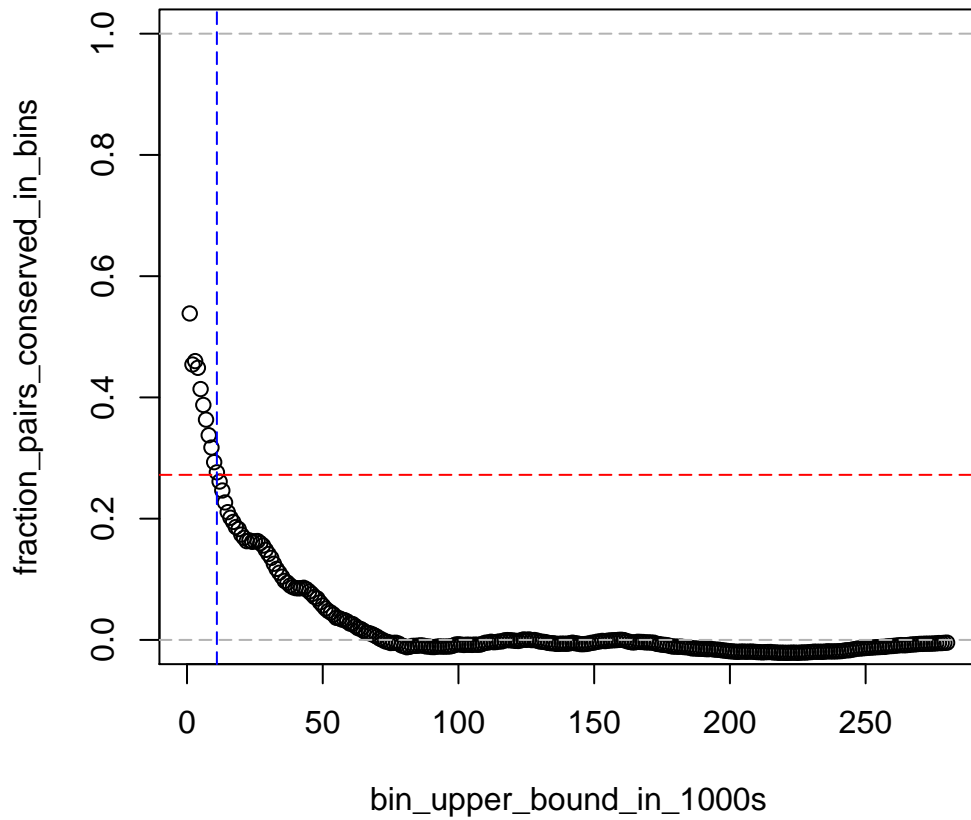

**Bin\_conservation\_minus\_bg\_AP110A\_vs\_NE-JV-2**  
**PD-0.462499**

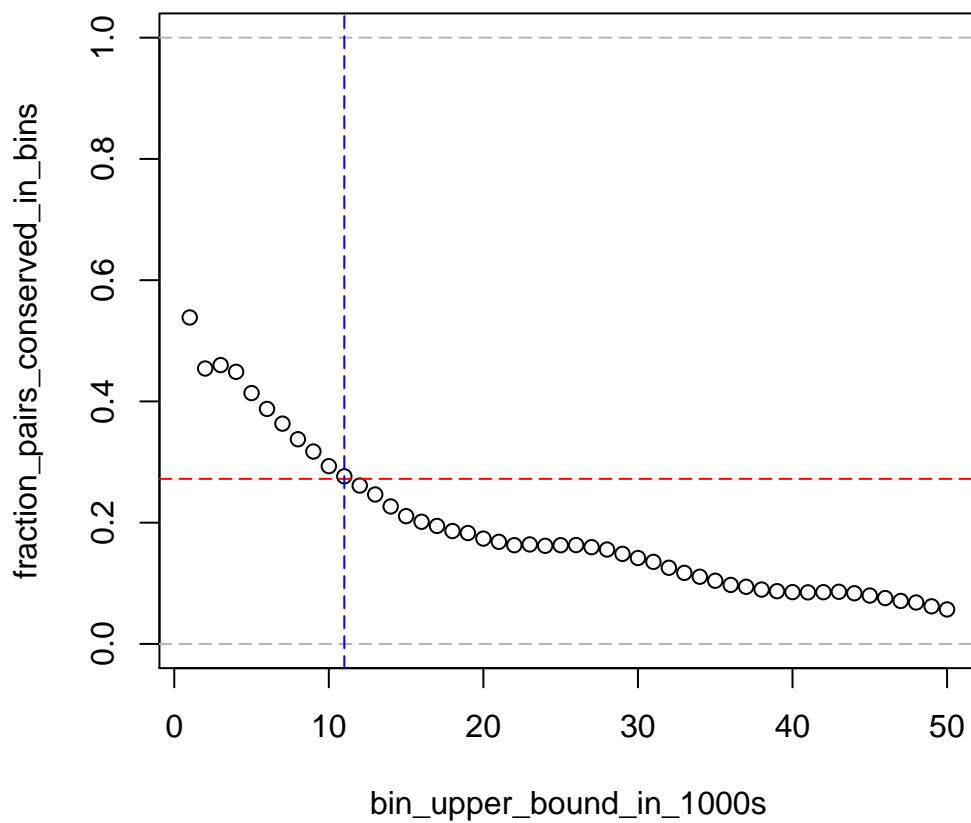

Supplement: s1 [file s1]

**Bin\_conservation\_minus\_bg\_KS1B\_vs\_OR0704.3**  
**PD-0.69364**

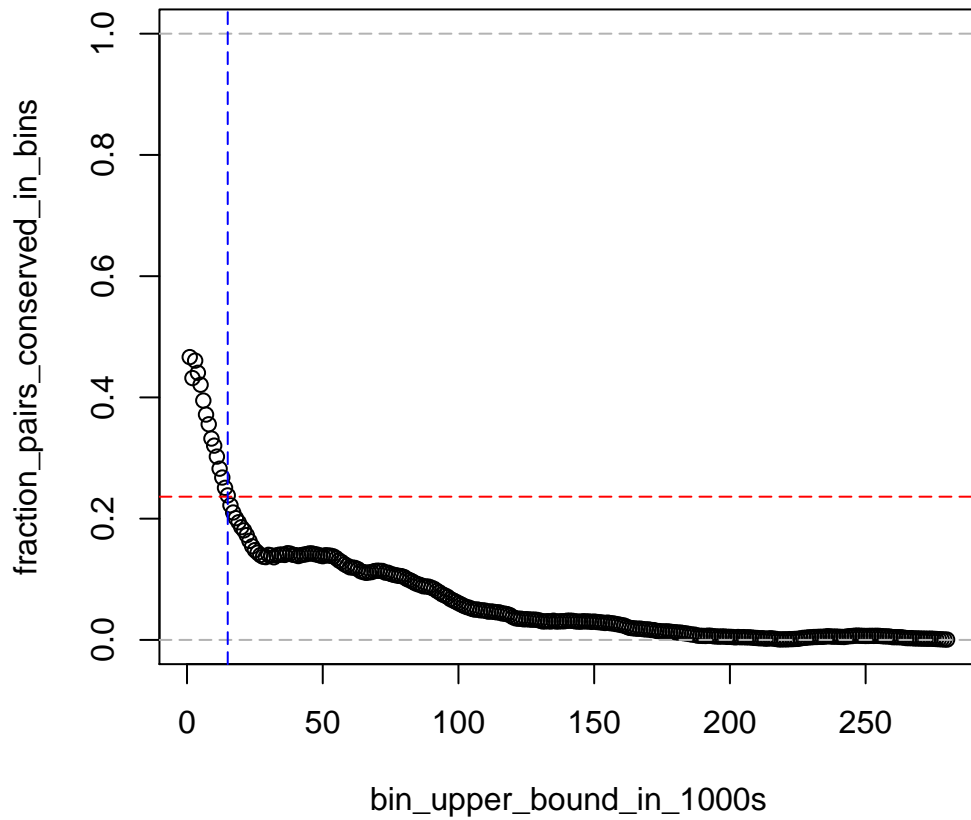

**Bin\_conservation\_minus\_bg\_KS1B\_vs\_OR0704.3**  
**PD-0.69364**

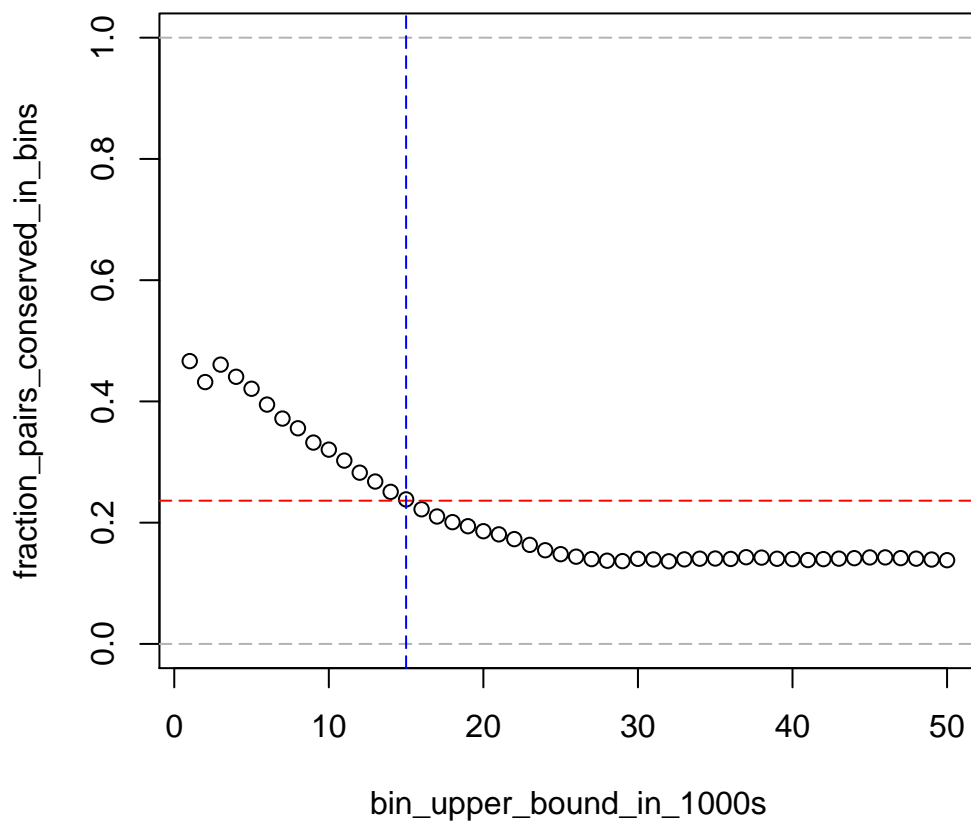

Supplement: s1 [file s1]

**Bin\_conservation\_minus\_bg\_AN69C\_vs\_MO0605SPH**  
**PD-0.681722**

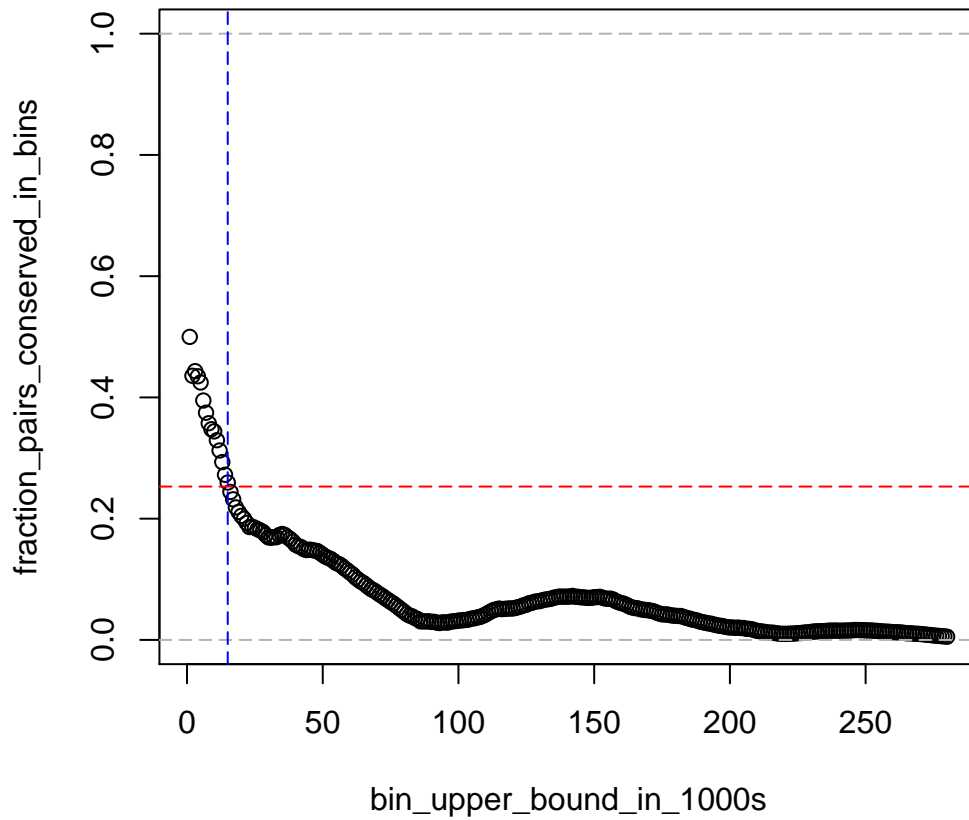

**Bin\_conservation\_minus\_bg\_AN69C\_vs\_MO0605SPH**  
**PD-0.681722**

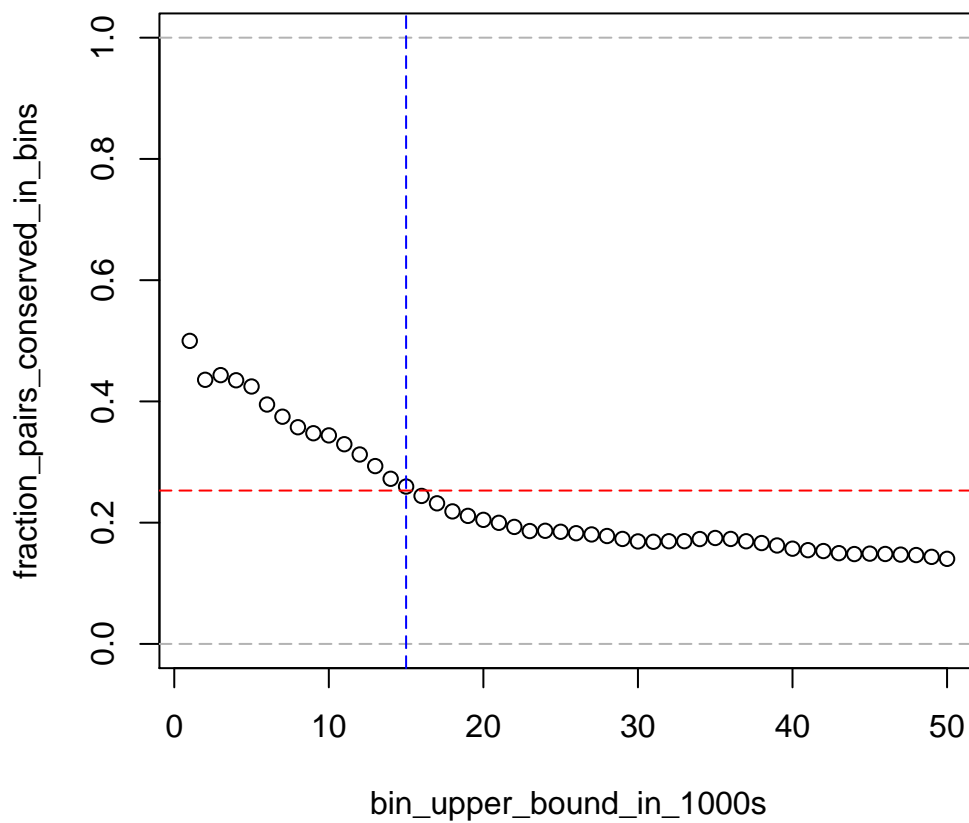

Supplement: s1 [file s1]

**Bin\_conservation\_minus\_bg\_CVB-1\_vs\_MO0605SPH**  
**PD-0.479396**

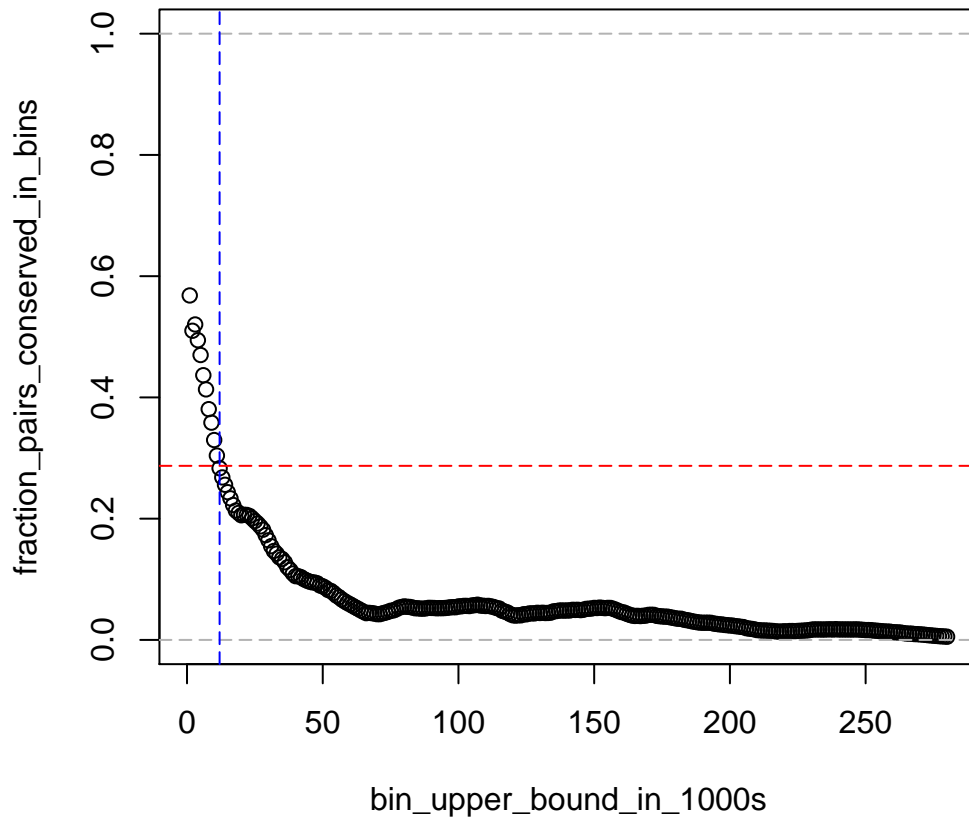

**Bin\_conservation\_minus\_bg\_CVB-1\_vs\_MO0605SPH**  
**PD-0.479396**

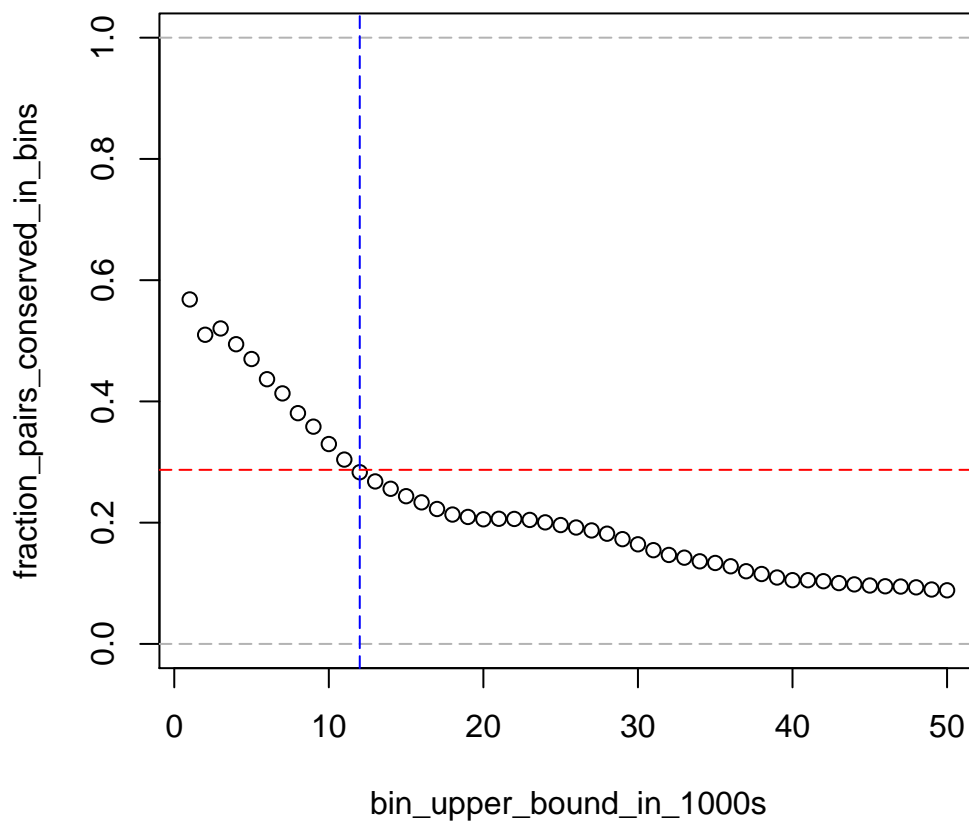

Supplement: s1 [file s1]

**Bin\_conservation\_minus\_bg\_CviKI\_vs\_CVM-1**  
**PD-0.650859**

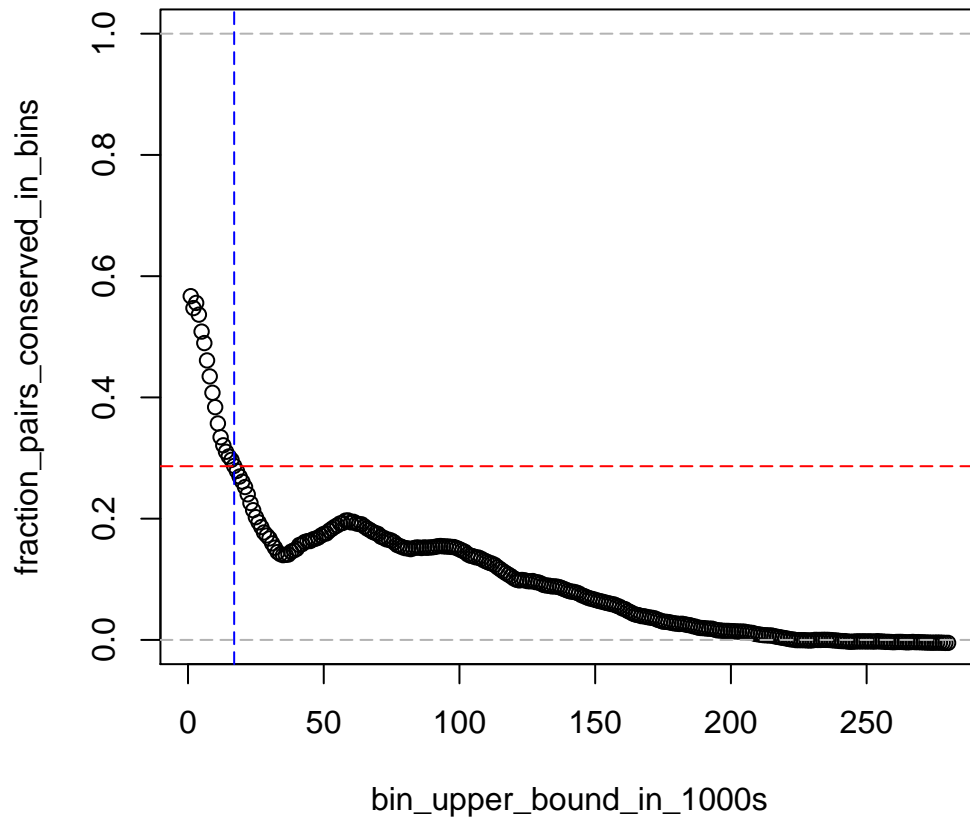

**Bin\_conservation\_minus\_bg\_CviKI\_vs\_CVM-1**  
**PD-0.650859**

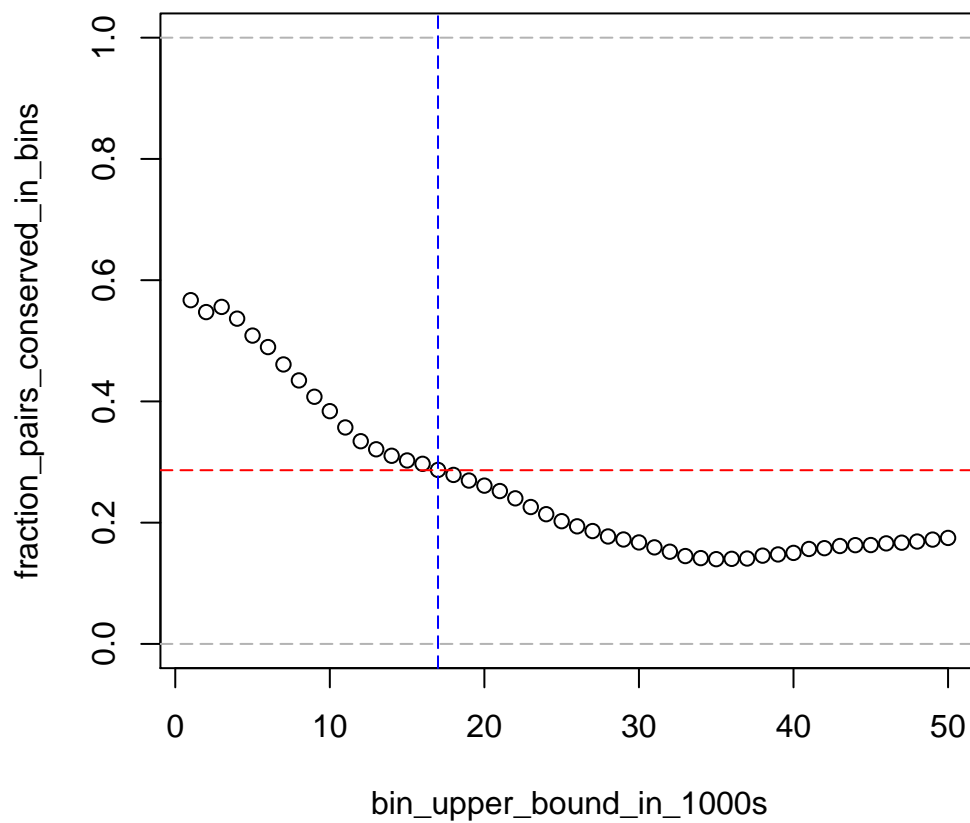

Supplement: s1 [file s1]

**Bin\_conservation\_minus\_bg\_Fr5L\_vs\_NE-JV-2**  
**PD-0.459159**

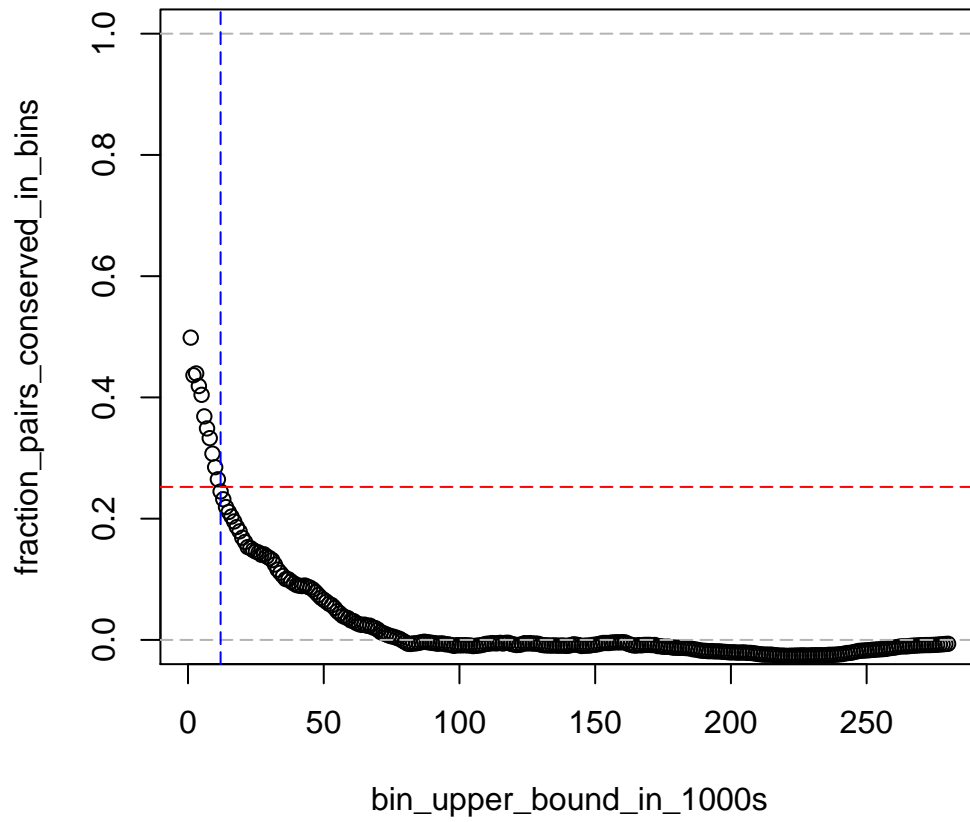

**Bin\_conservation\_minus\_bg\_Fr5L\_vs\_NE-JV-2**  
**PD-0.459159**

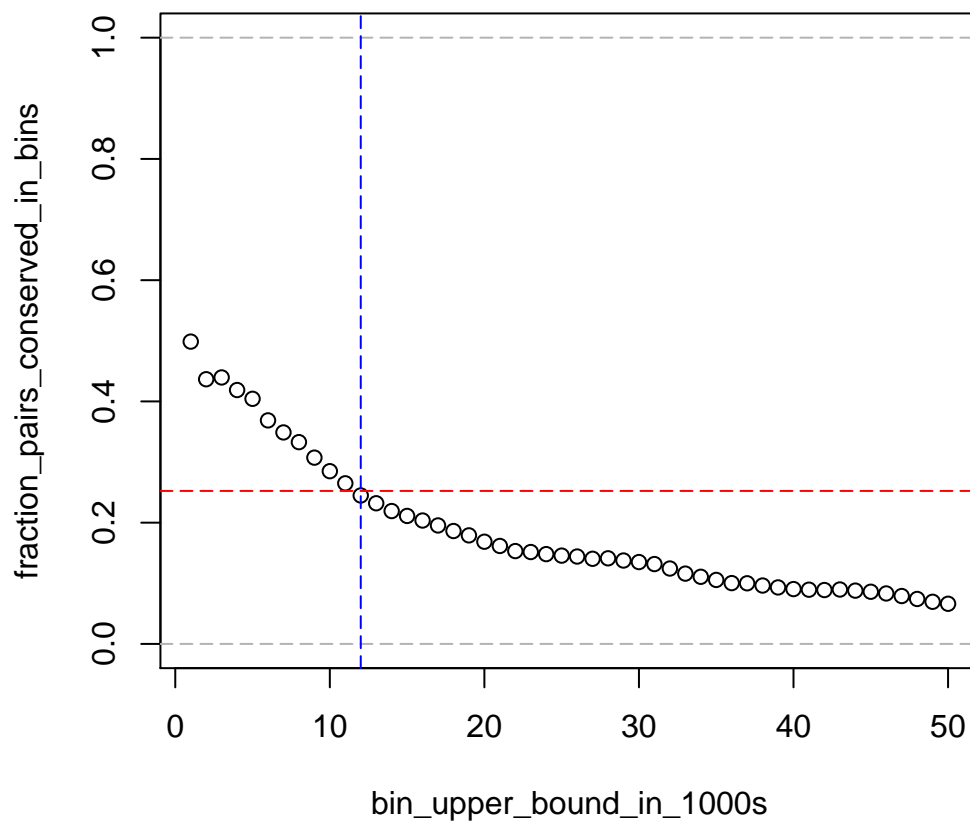

Supplement: s1 [file s1]

**Bin\_conservation\_minus\_bg\_MO0605SPH\_vs\_TN603.4.1**  
**PD-0.065277**

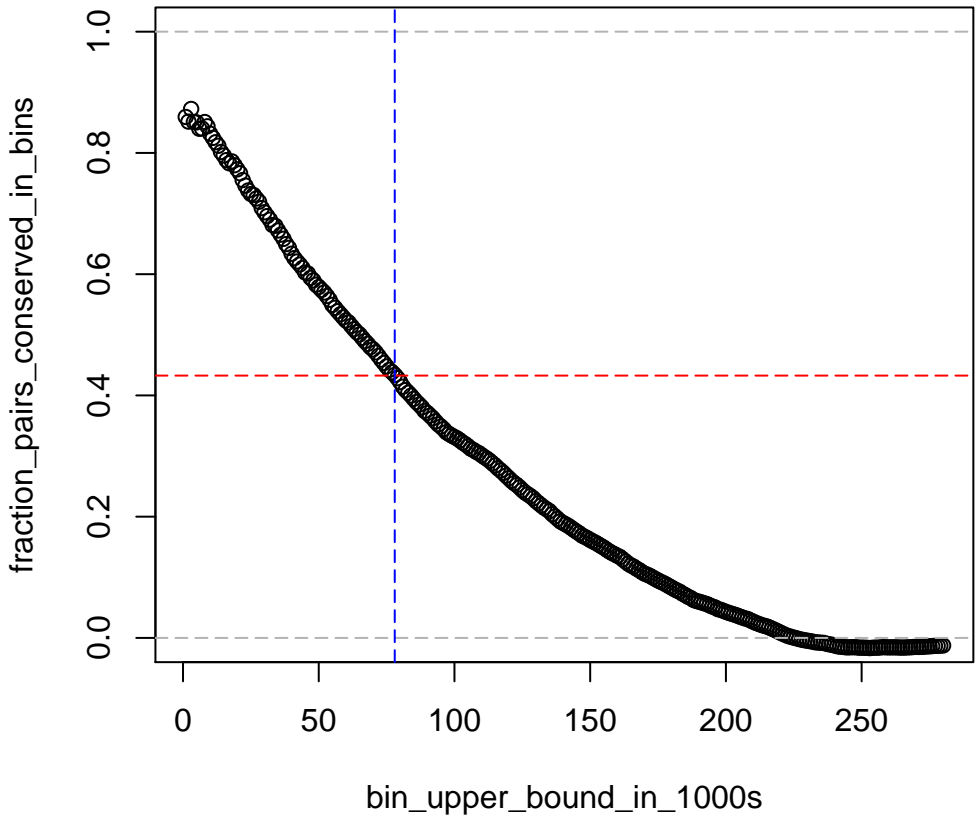

**Bin\_conservation\_minus\_bg\_MO0605SPH\_vs\_TN603.4.1**  
**PD-0.065277**

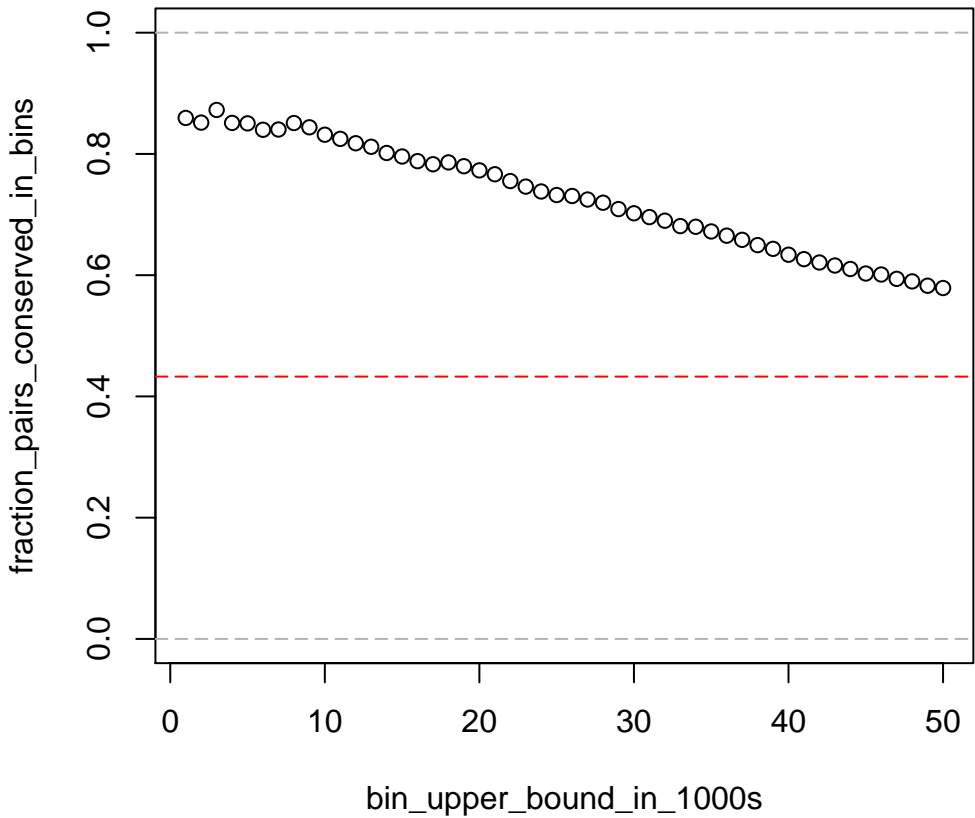

Supplement: s1 [file s1]

**Bin\_conservation\_minus\_bg\_MA-1E\_vs\_NTS-1**  
**PD-0.689643**

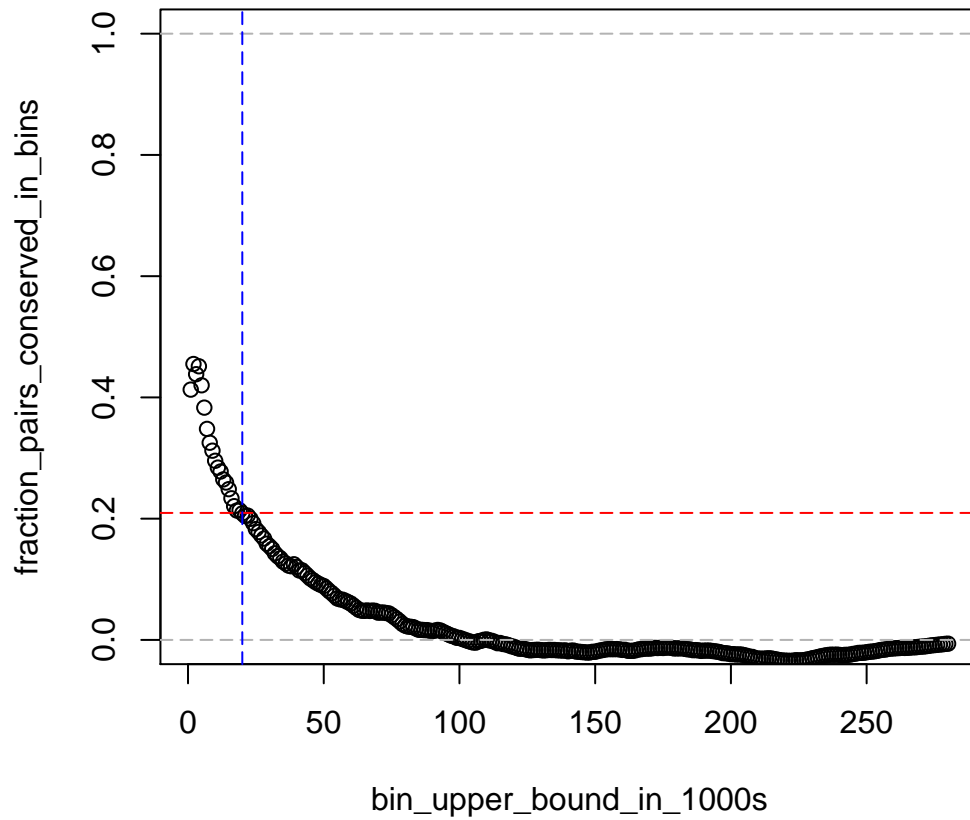

**Bin\_conservation\_minus\_bg\_MA-1E\_vs\_NTS-1**  
**PD-0.689643**

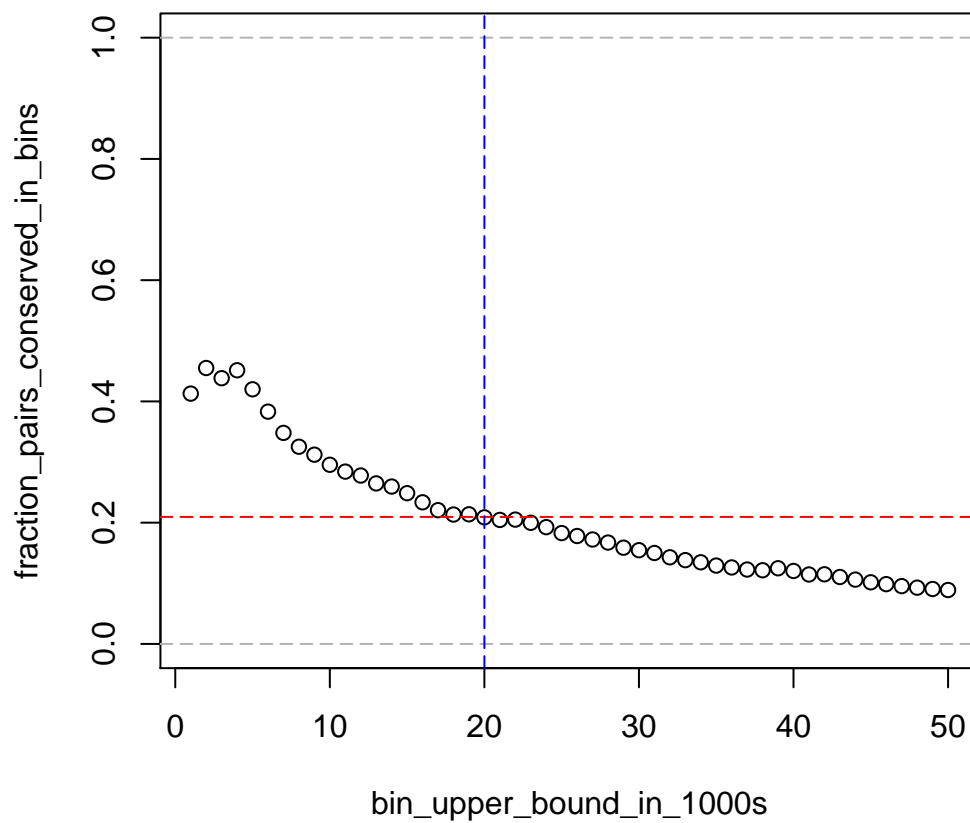

Supplement: s1 [file s1]

**Bin\_conservation\_minus\_bg\_NY-2B\_vs\_TN603.4.2**  
**PD-0.695015**

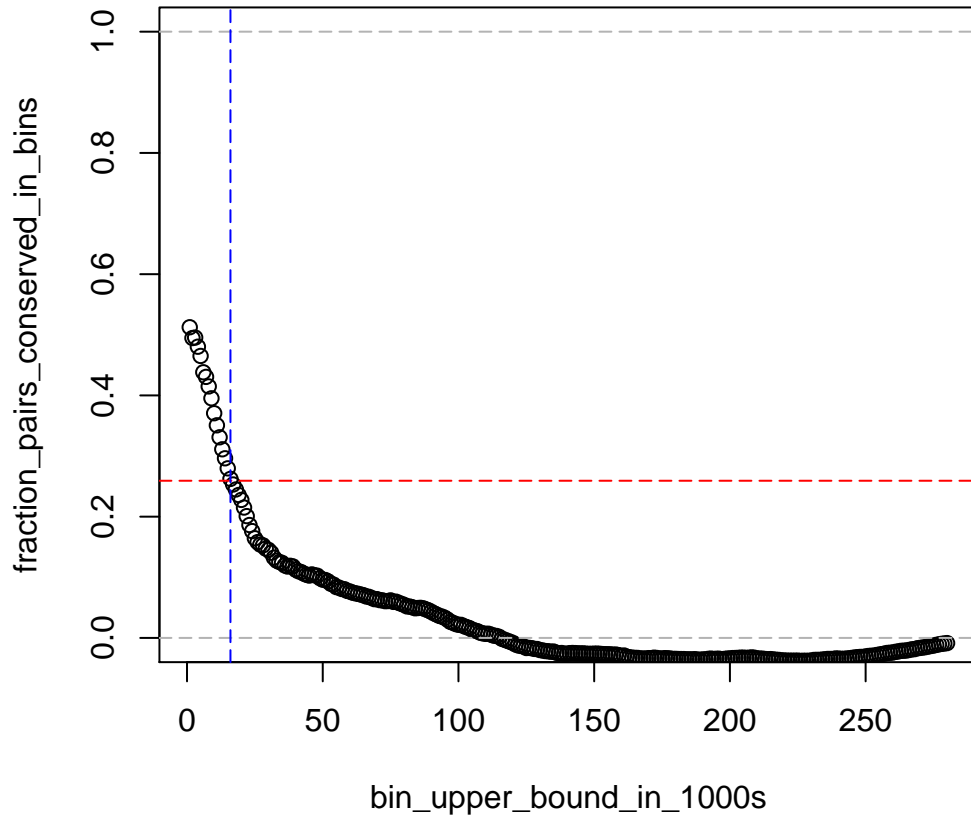

**Bin\_conservation\_minus\_bg\_NY-2B\_vs\_TN603.4.2**  
**PD-0.695015**

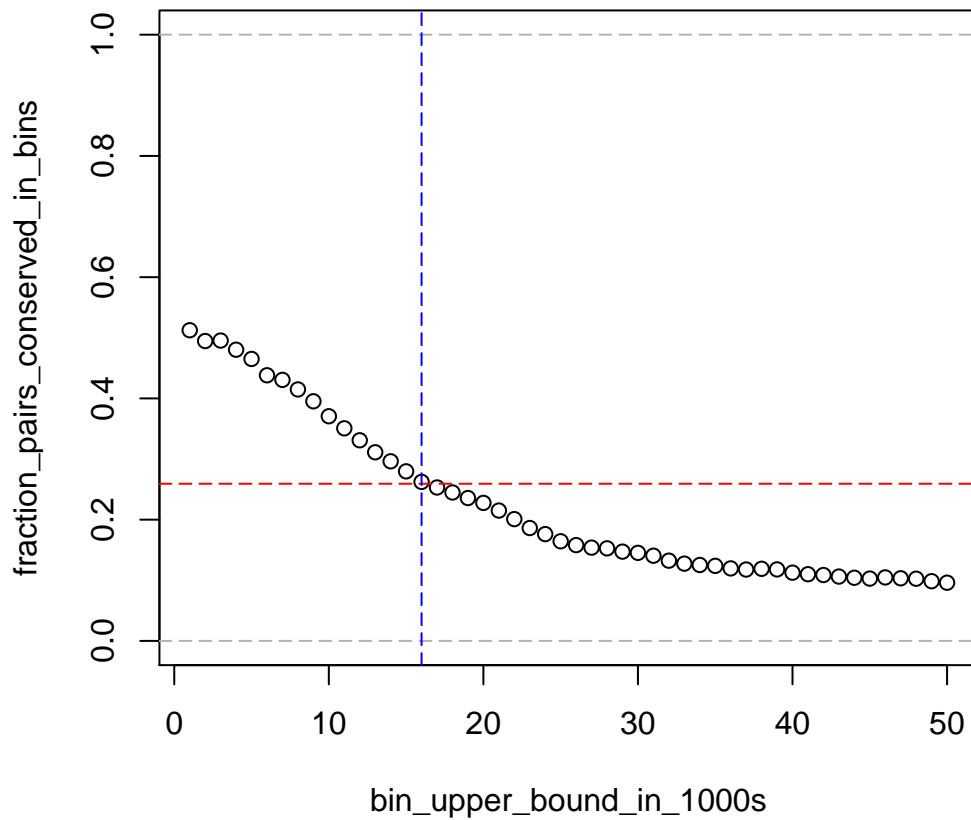

Supplement: s1 [file s1]

**Bin\_conservation\_minus\_bg\_CVR-1\_vs\_MT325**  
**PD-0.020553**

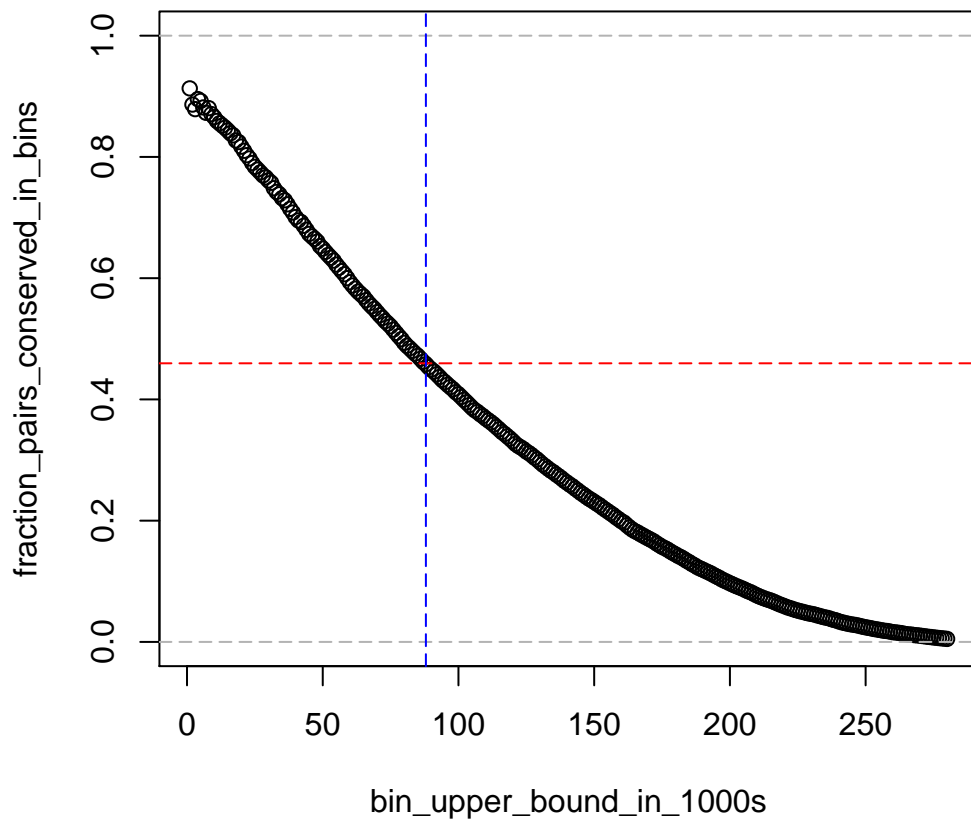

**Bin\_conservation\_minus\_bg\_CVR-1\_vs\_MT325**  
**PD-0.020553**

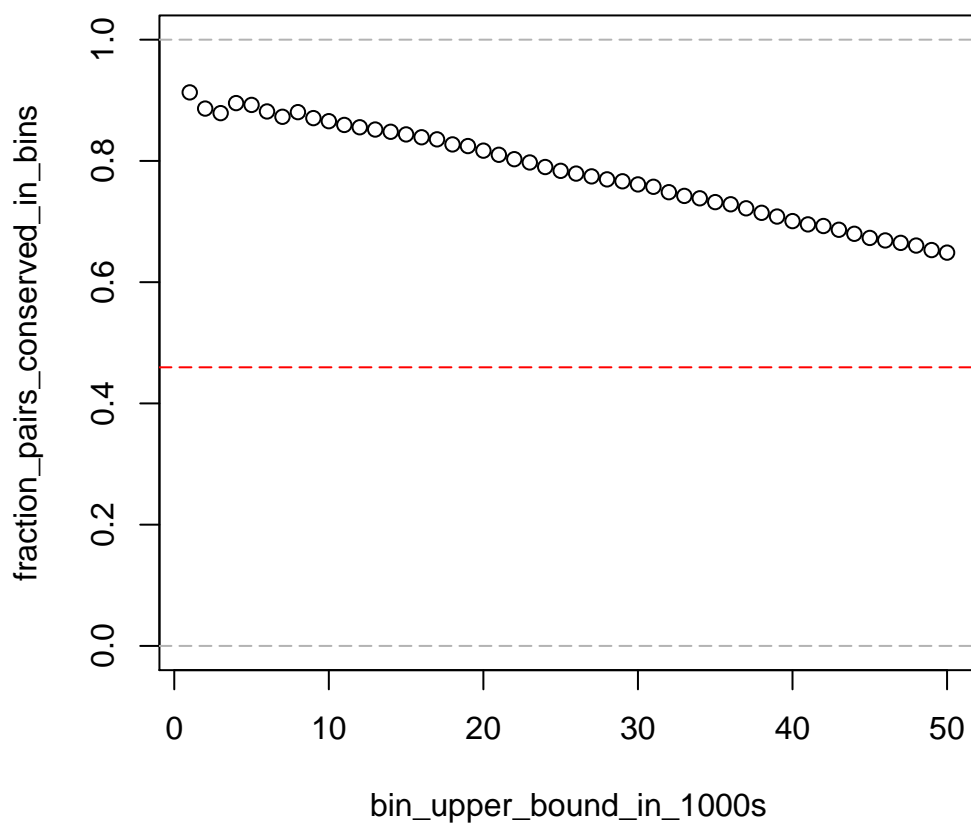

Supplement: s1 [file s1]

**Bin\_conservation\_minus\_bg\_FR483\_vs\_NW665.2**  
**PD-0.020629**

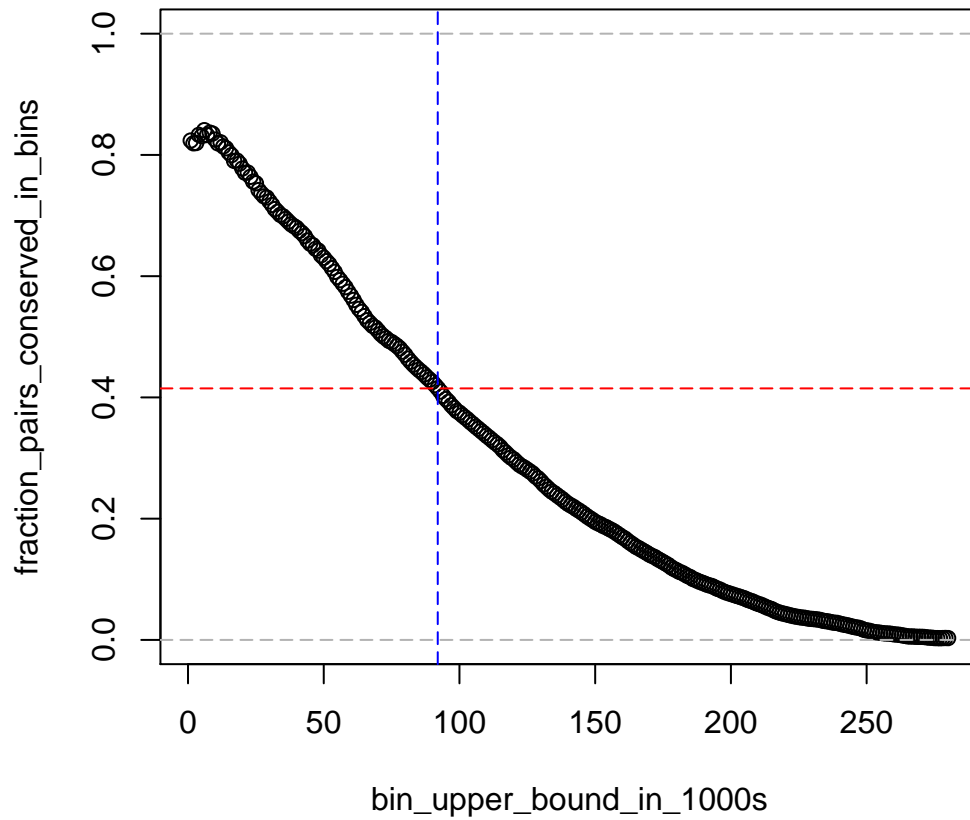

**Bin\_conservation\_minus\_bg\_FR483\_vs\_NW665.2**  
**PD-0.020629**

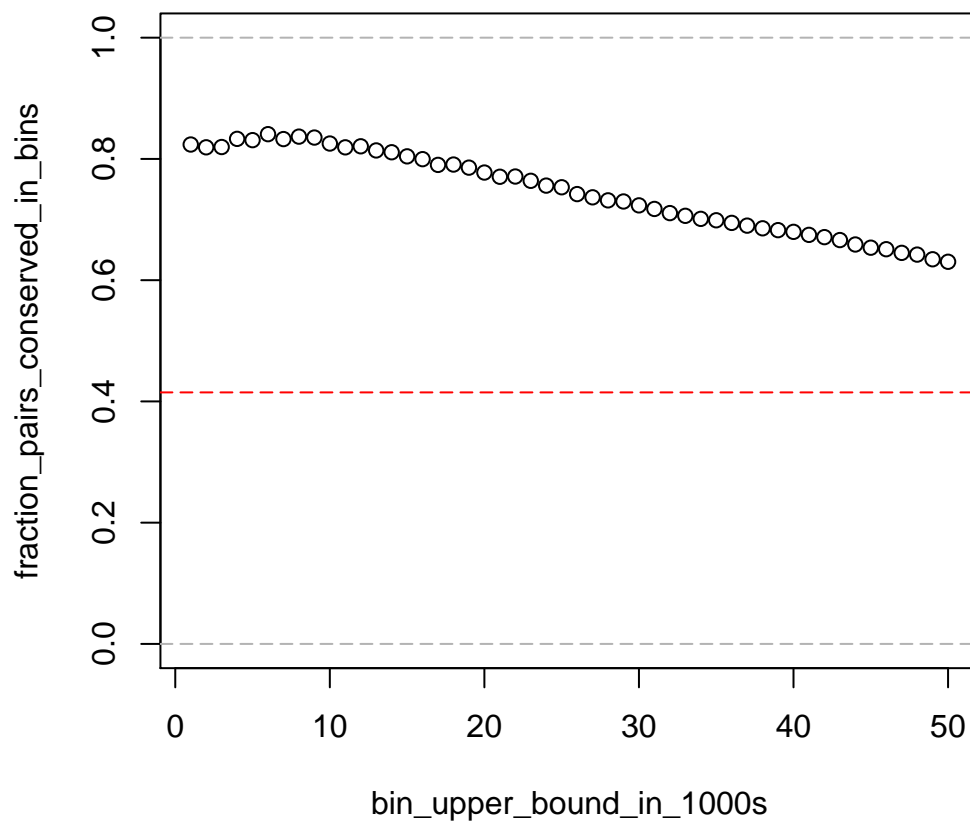

Supplement: s1 [file s1]

**Bin\_conservation\_minus\_bg\_CVG-1\_vs\_TN603.4.2**  
**PD-0.451496**

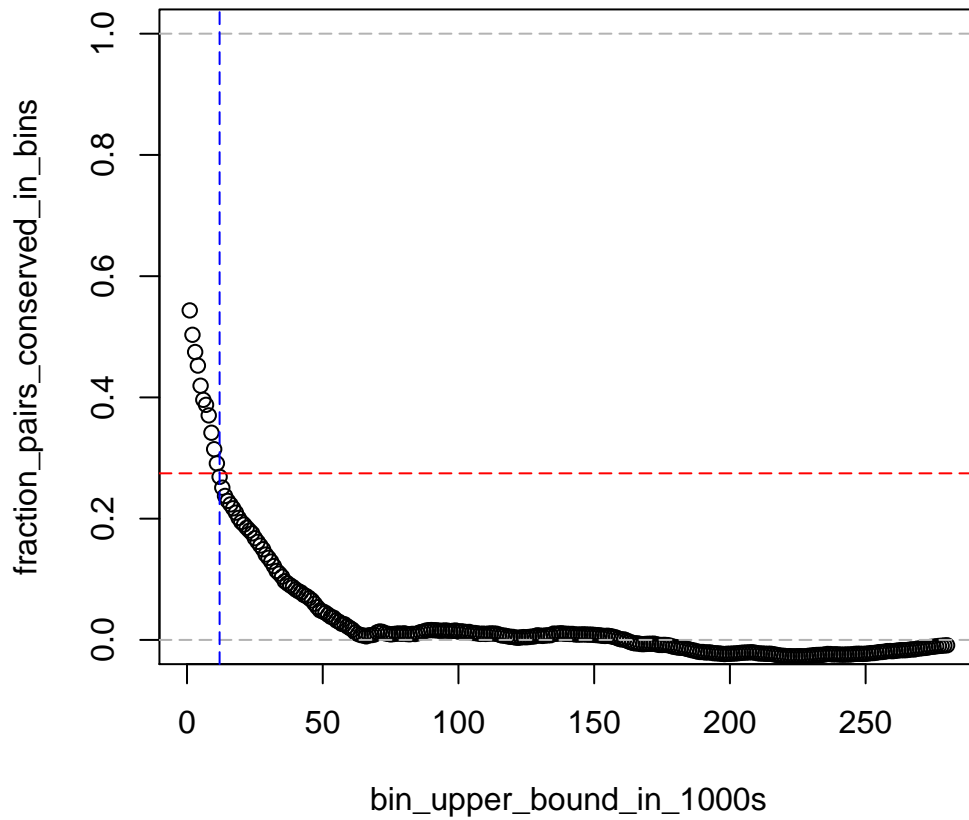

**Bin\_conservation\_minus\_bg\_CVG-1\_vs\_TN603.4.2**  
**PD-0.451496**

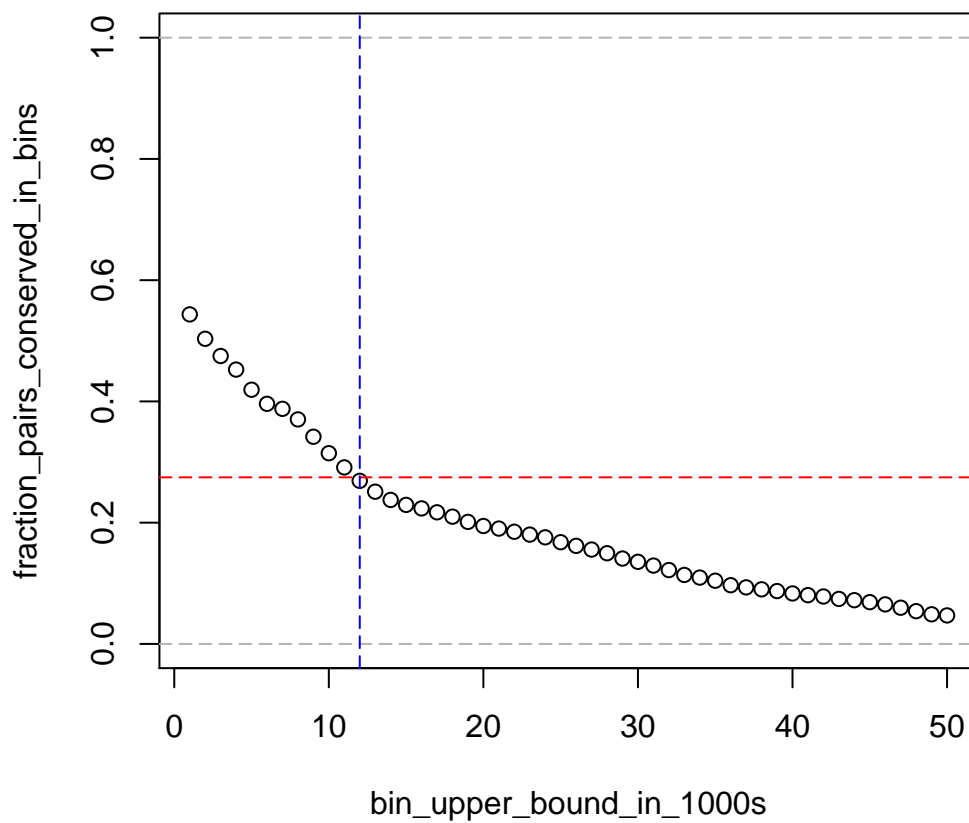

Supplement: s1 [file s1]

**Bin\_conservation\_minus\_bg\_ATCV1\_vs\_CVB-1**  
**PD-0.475235**

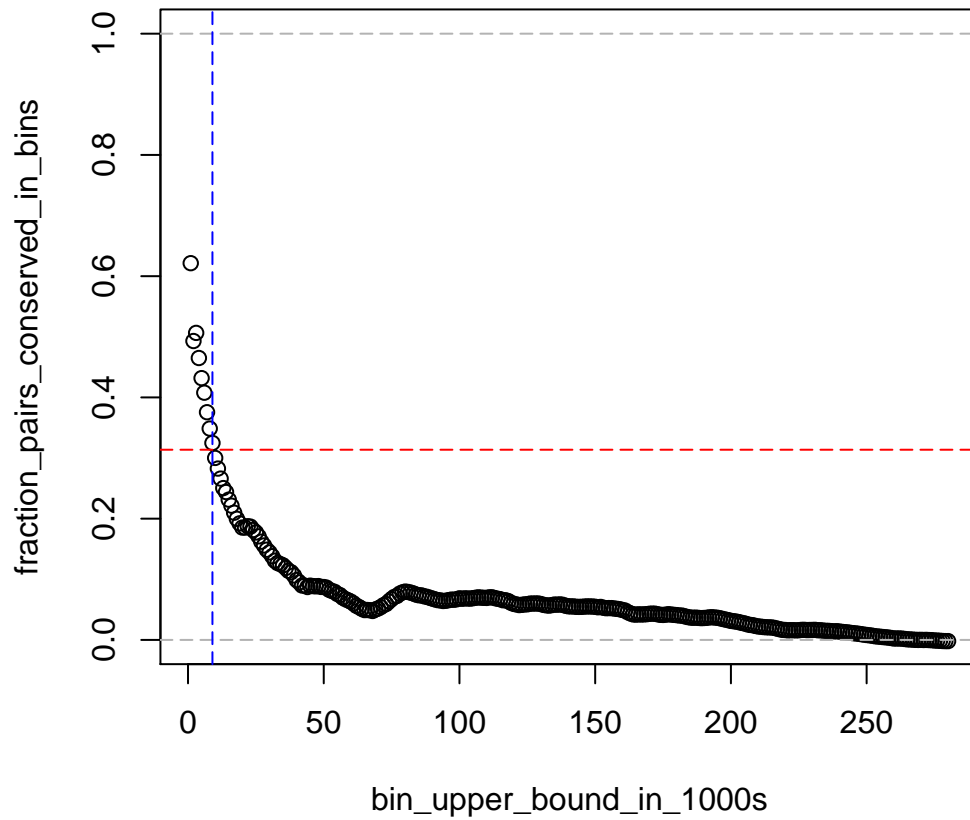

**Bin\_conservation\_minus\_bg\_ATCV1\_vs\_CVB-1**  
**PD-0.475235**

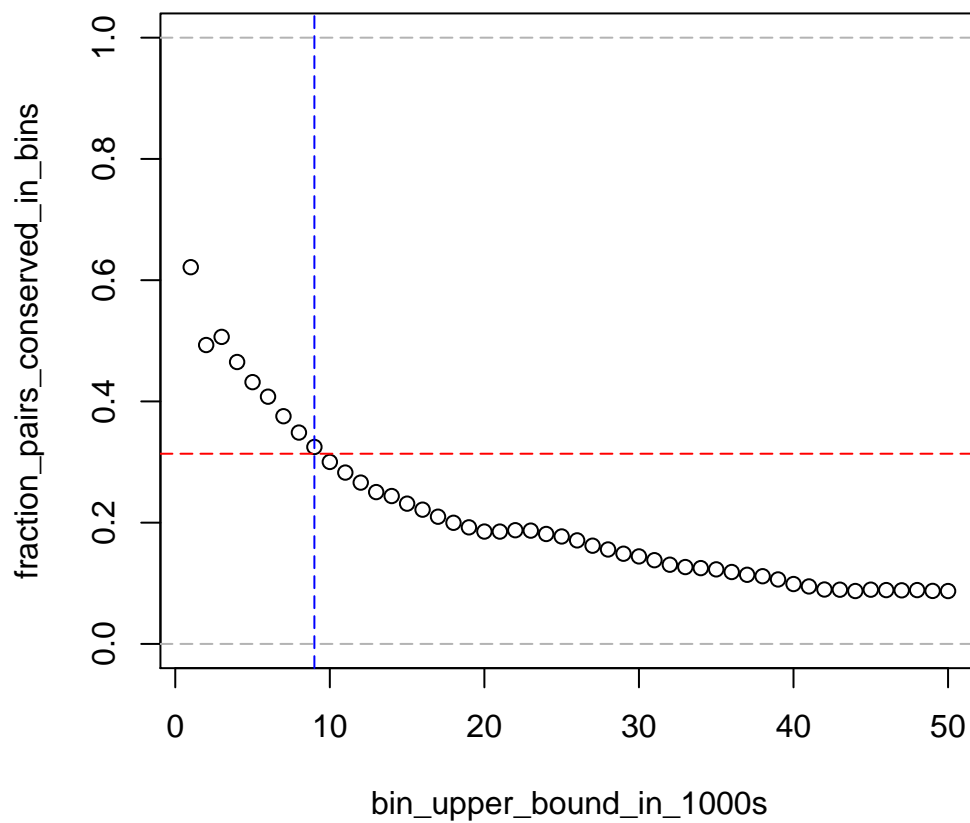

Supplement: s1 [file s1]

**Bin\_conservation\_minus\_bg\_AR158\_vs\_GM0701.1**  
**PD-0.695126**

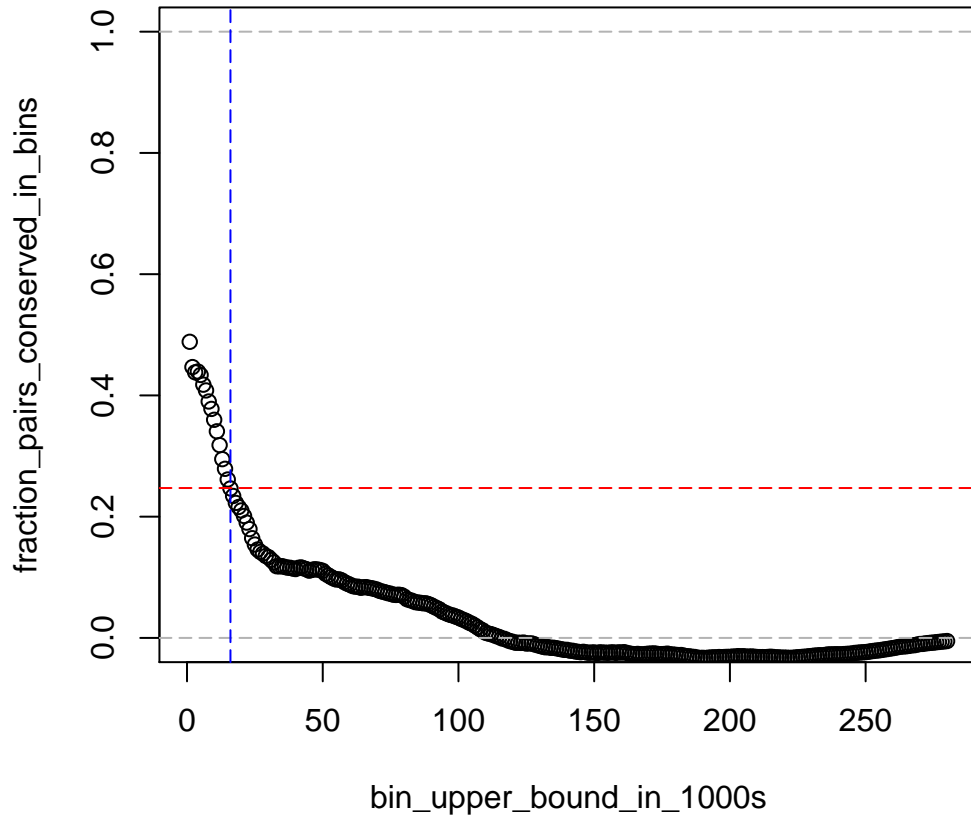

**Bin\_conservation\_minus\_bg\_AR158\_vs\_GM0701.1**  
**PD-0.695126**

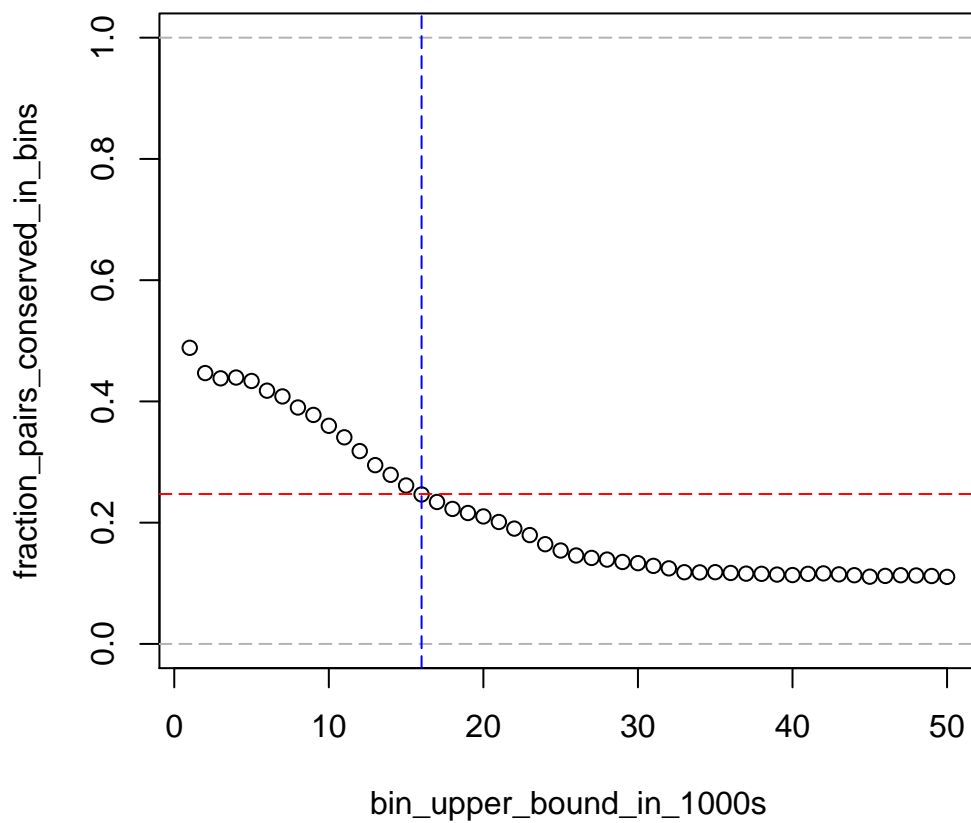

Supplement: s1 [file s1]

**Bin\_conservation\_minus\_bg\_KS1B\_vs\_OR0704.2.2**  
**PD-0.65068**

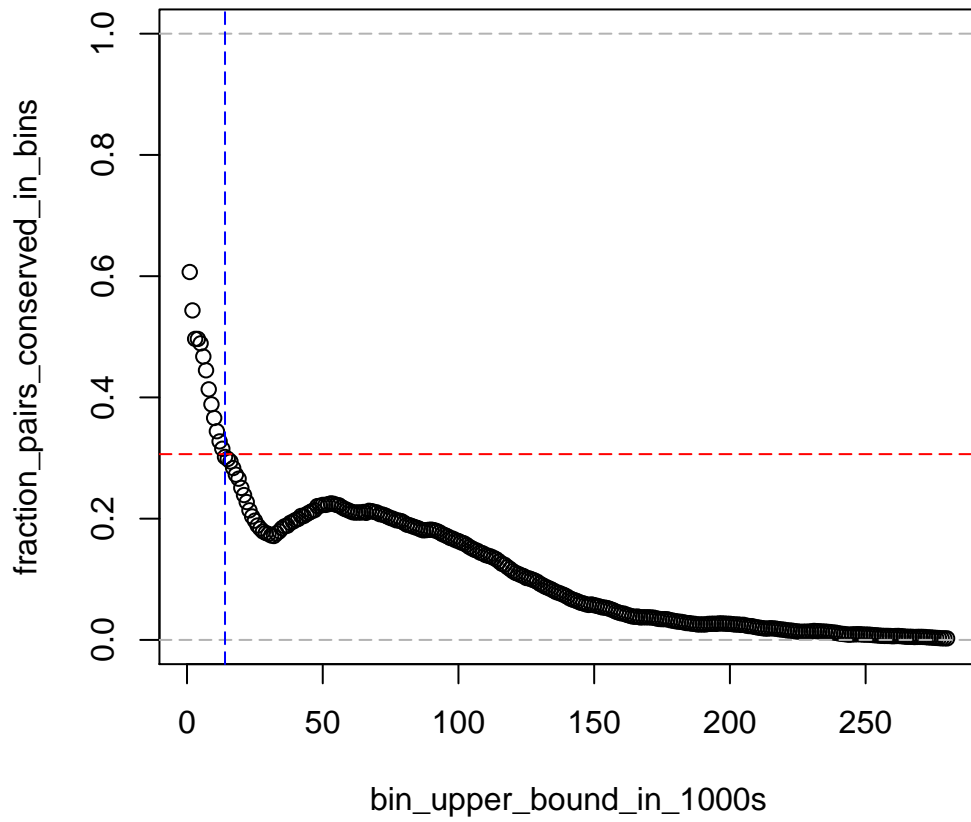

**Bin\_conservation\_minus\_bg\_KS1B\_vs\_OR0704.2.2**  
**PD-0.65068**

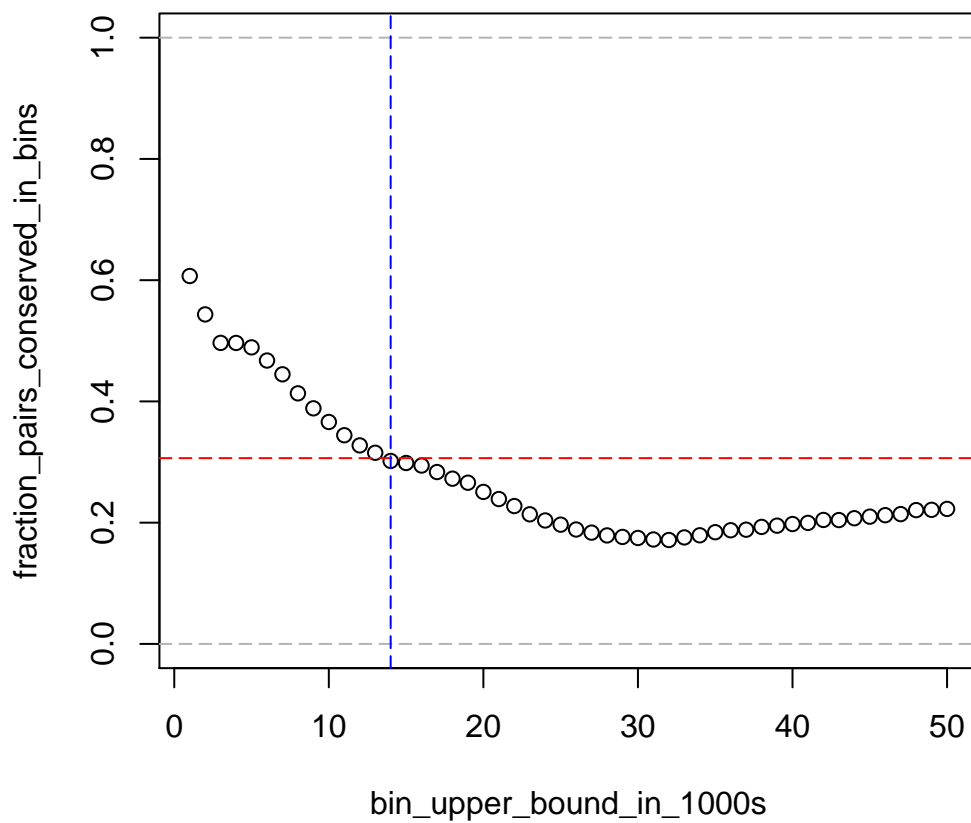

Supplement: s1 [file s1]

**Bin\_conservation\_minus\_bg\_Br0604L\_vs\_CvsA1**  
**PD-0.683896**

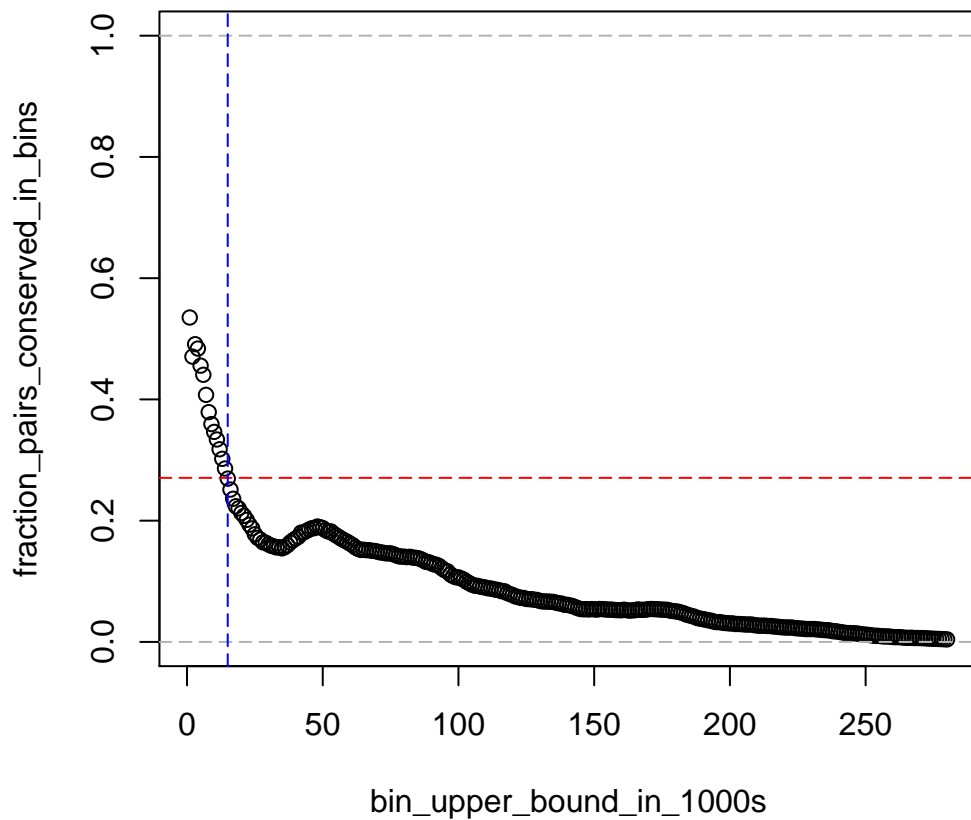

**Bin\_conservation\_minus\_bg\_Br0604L\_vs\_CvsA1**  
**PD-0.683896**

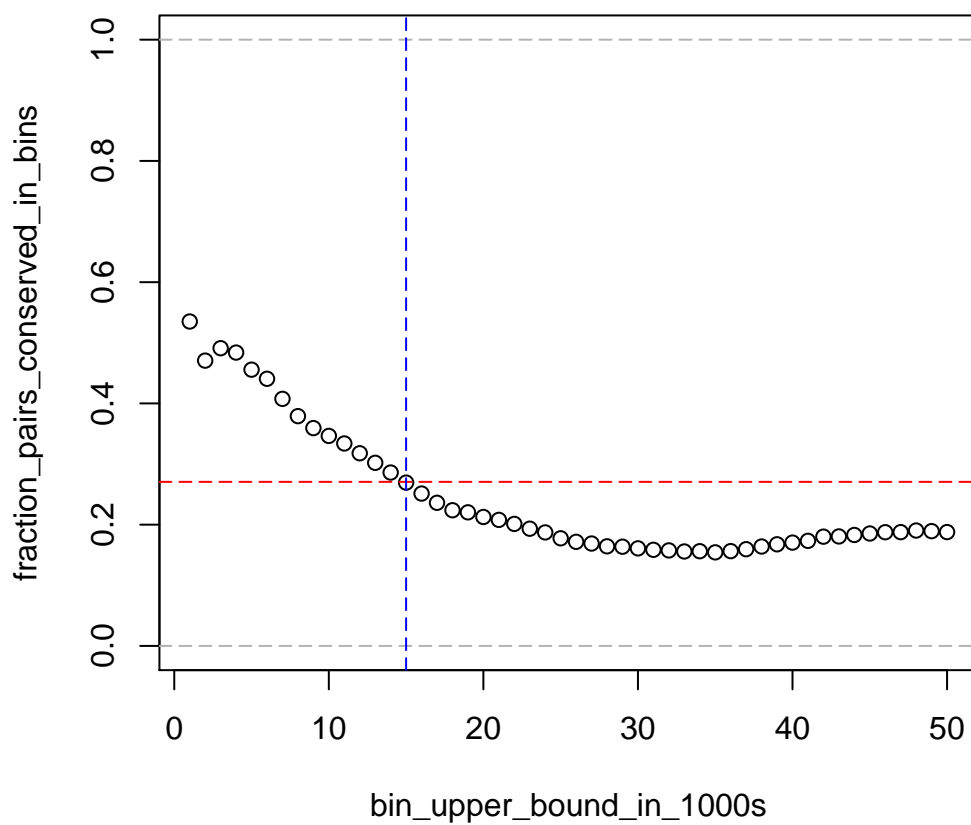

Supplement: s1 [file s1]

**Bin\_conservation\_minus\_bg\_CVM-1\_vs\_NE-JV-1**  
**PD-0.356802**

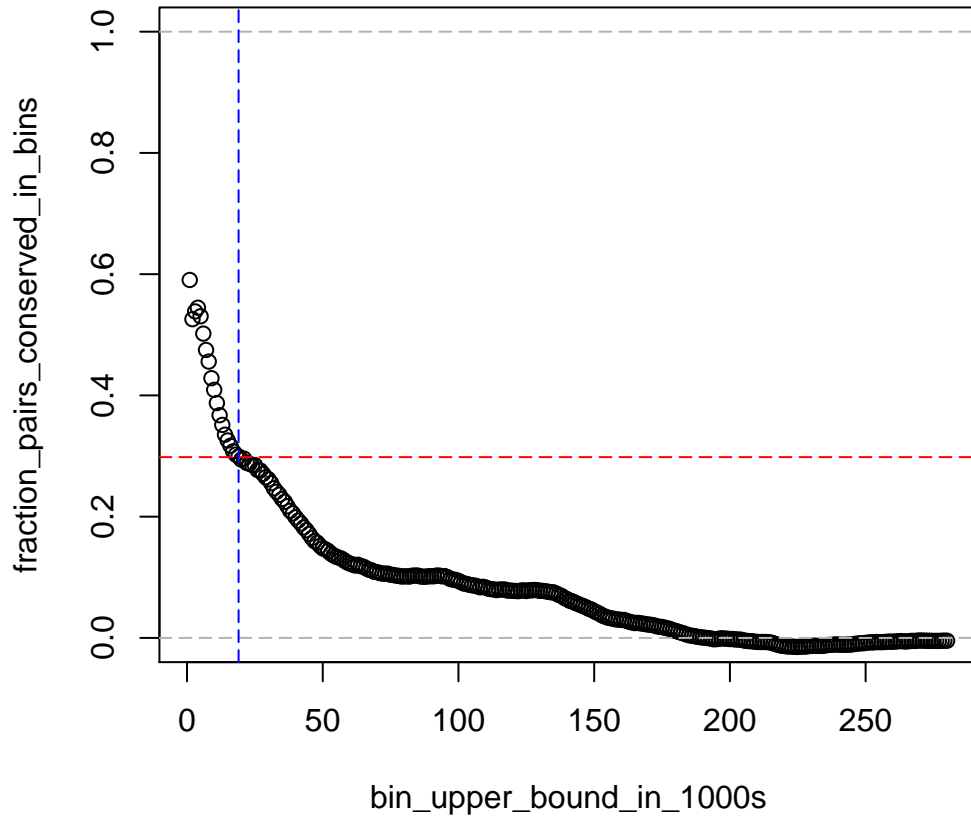

**Bin\_conservation\_minus\_bg\_CVM-1\_vs\_NE-JV-1**  
**PD-0.356802**

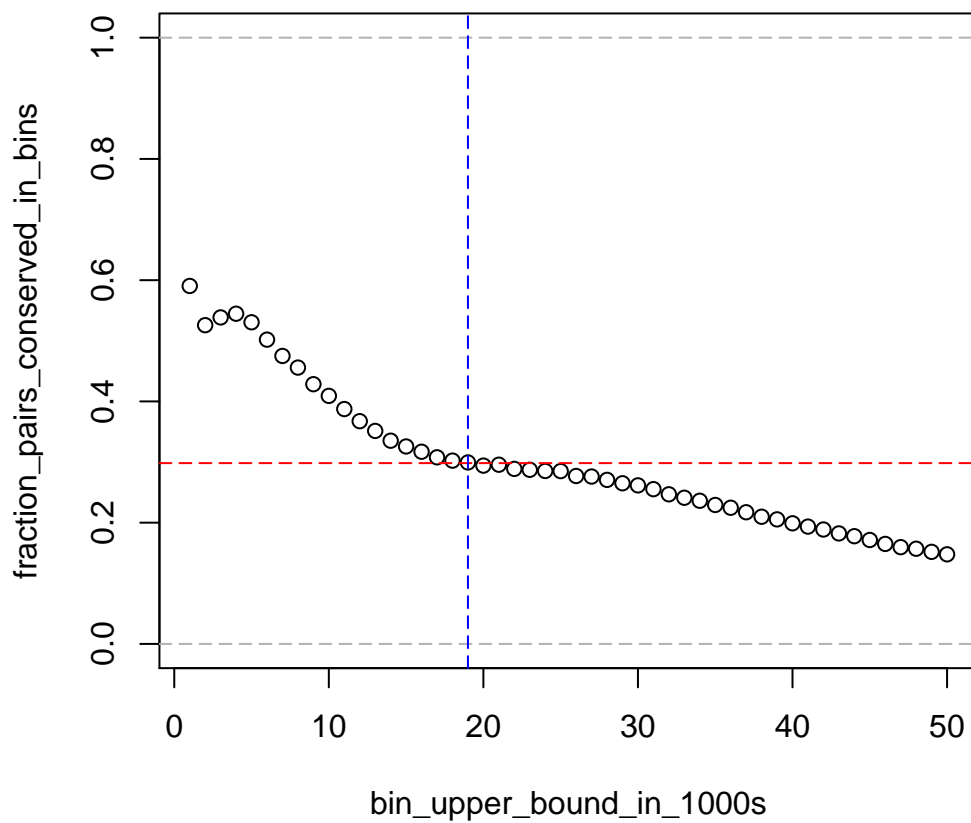

Supplement: s1 [file s1]

**Bin\_conservation\_minus\_bg\_FR483\_vs\_NYs-1**  
**PD-0.665644**

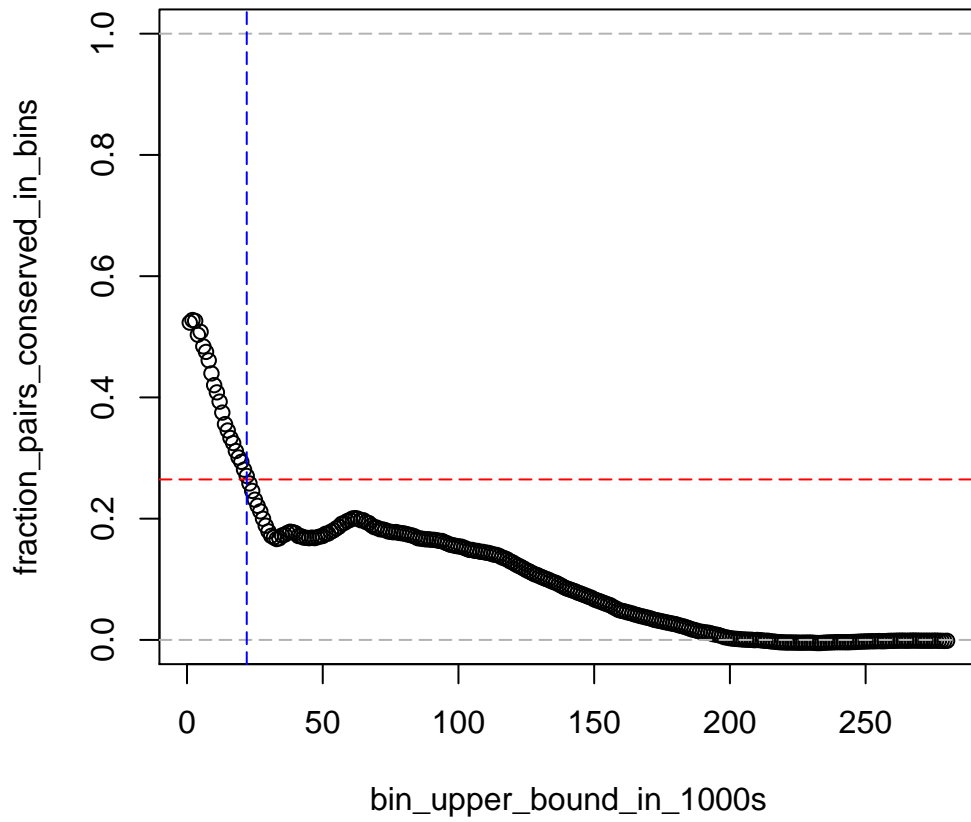

**Bin\_conservation\_minus\_bg\_FR483\_vs\_NYs-1**  
**PD-0.665644**

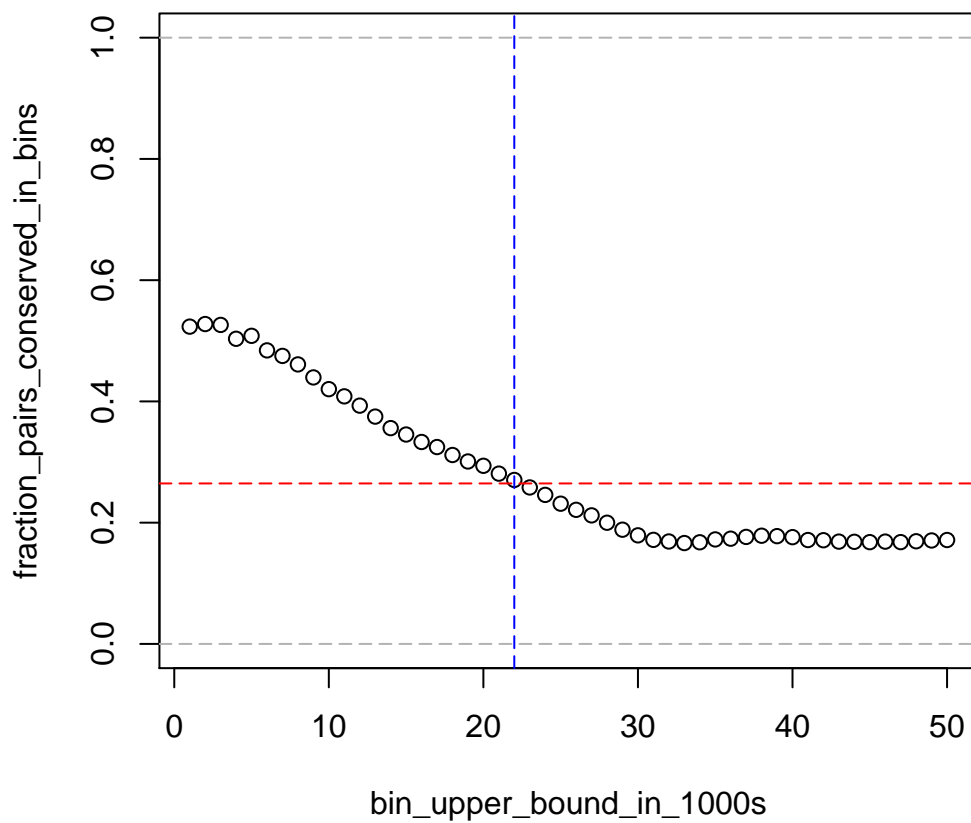

Supplement: s1 [file s1]

**Bin\_conservation\_minus\_bg\_CVR-1\_vs\_MA-1E**  
**PD-0.650193**

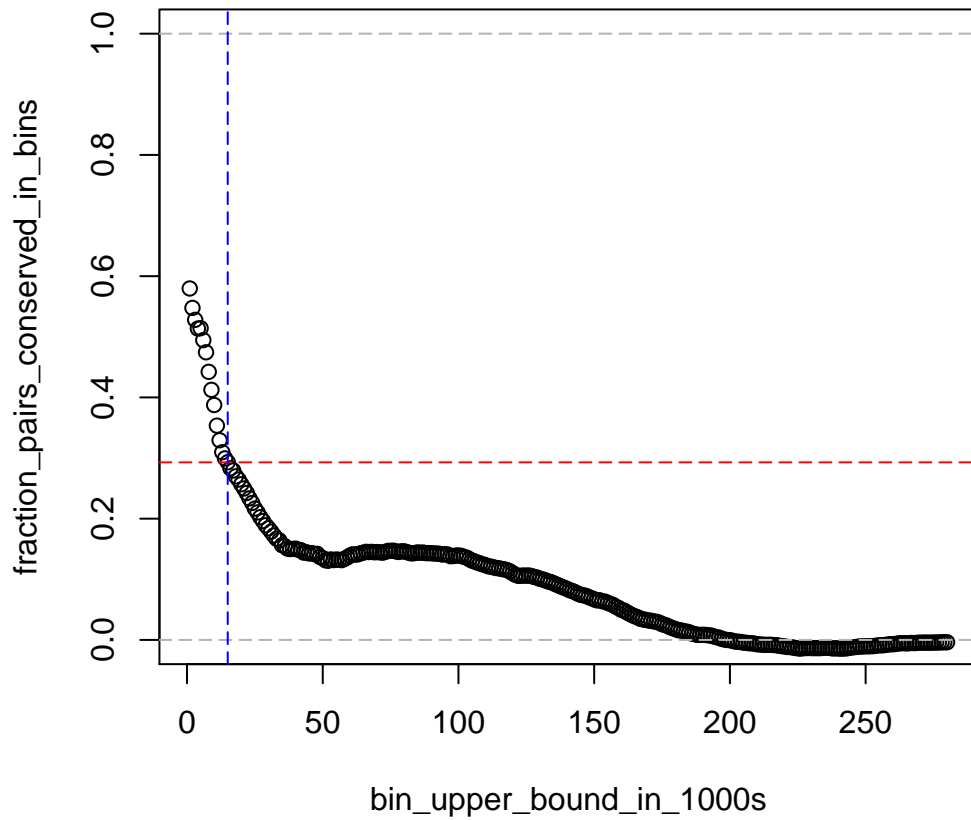

**Bin\_conservation\_minus\_bg\_CVR-1\_vs\_MA-1E**  
**PD-0.650193**

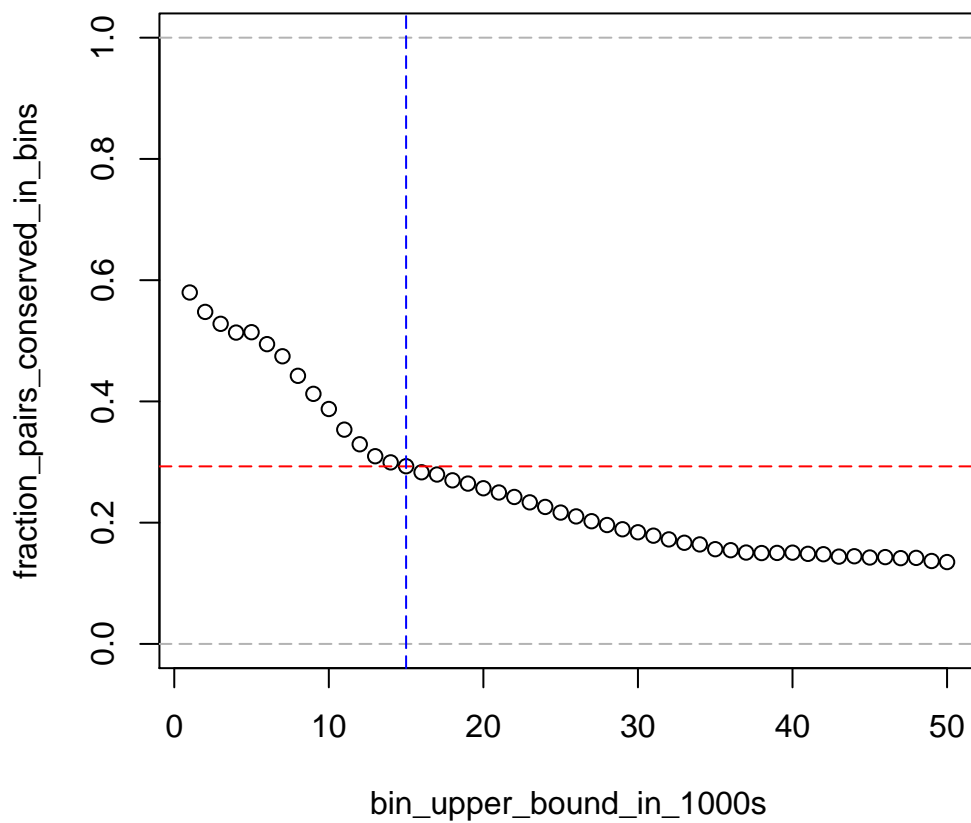

Supplement: s1 [file s1]

**Bin\_conservation\_minus\_bg\_CVG-1\_vs\_CvsA1**  
**PD-0.654372**

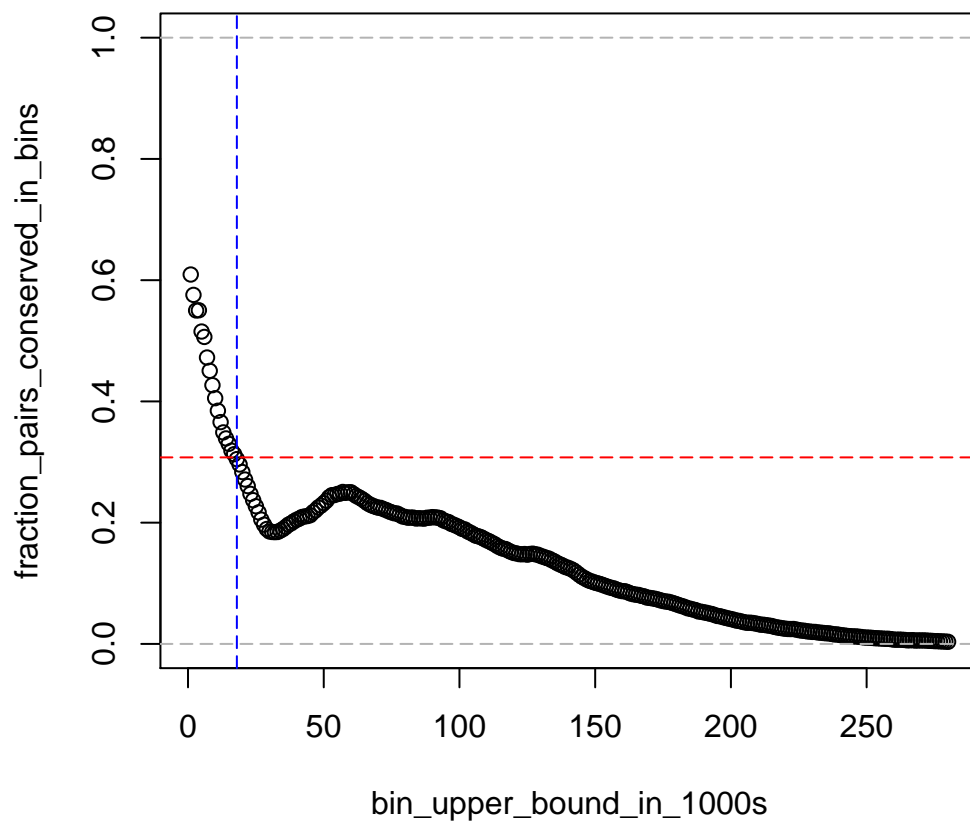

**Bin\_conservation\_minus\_bg\_CVG-1\_vs\_CvsA1**  
**PD-0.654372**

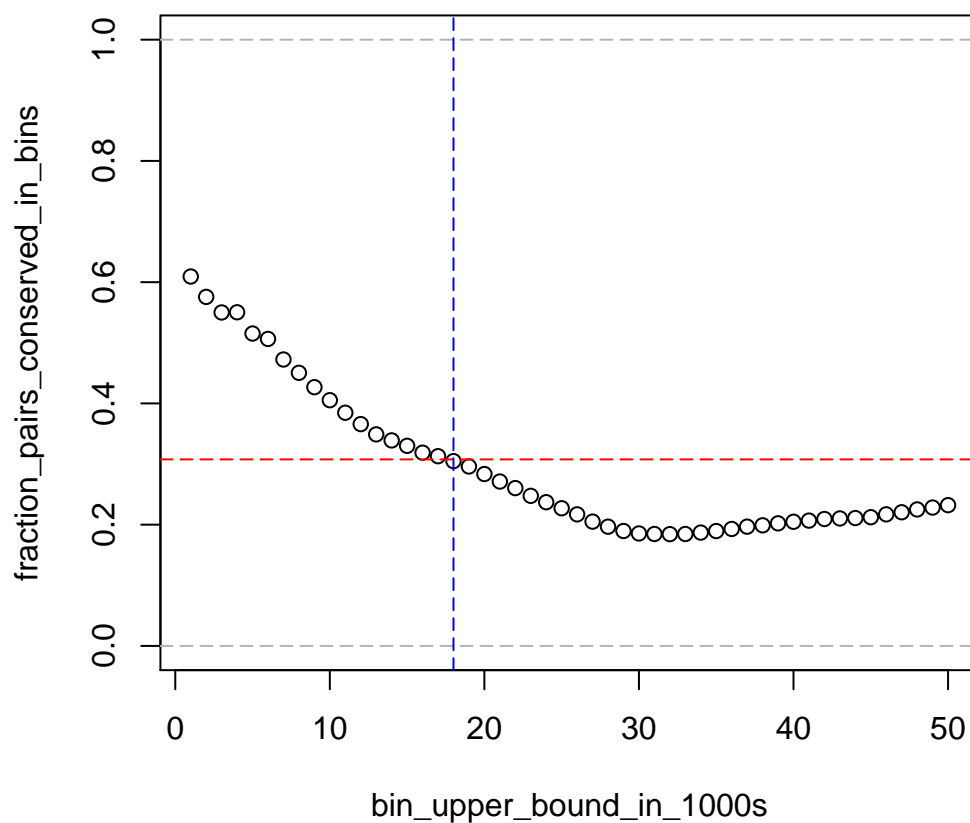

Supplement: s1 [file s1]

**Bin\_conservation\_minus\_bg\_CVA-1\_vs\_NW665.2**  
**PD-0.016477**

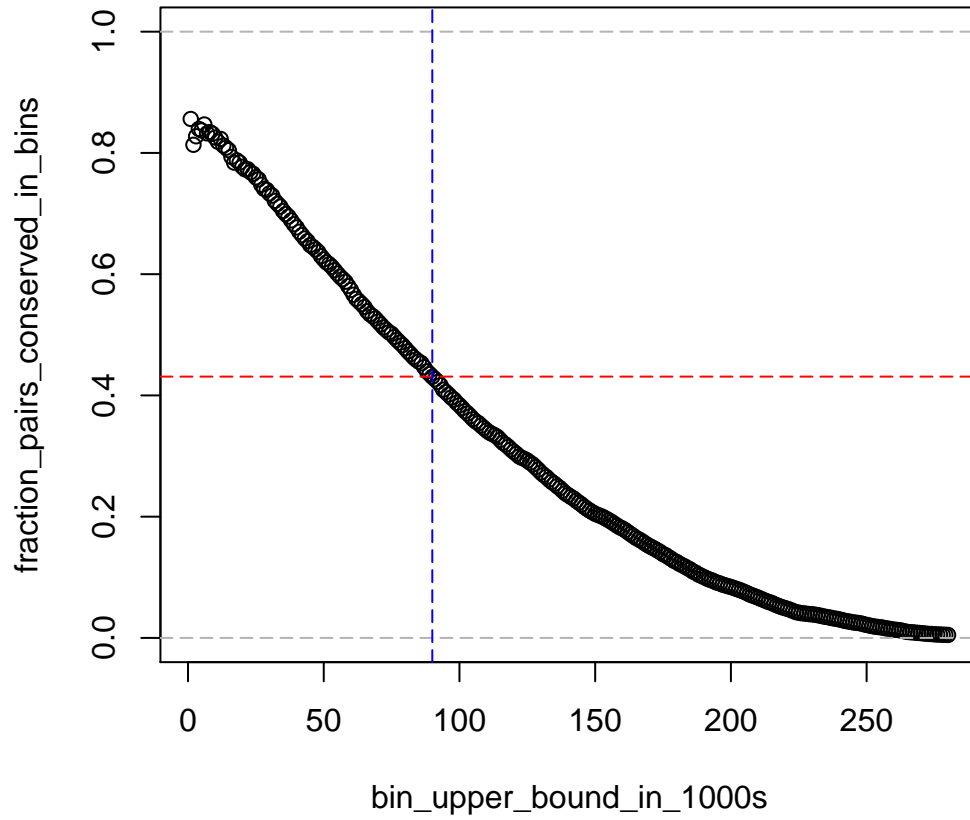

**Bin\_conservation\_minus\_bg\_CVA-1\_vs\_NW665.2**  
**PD-0.016477**

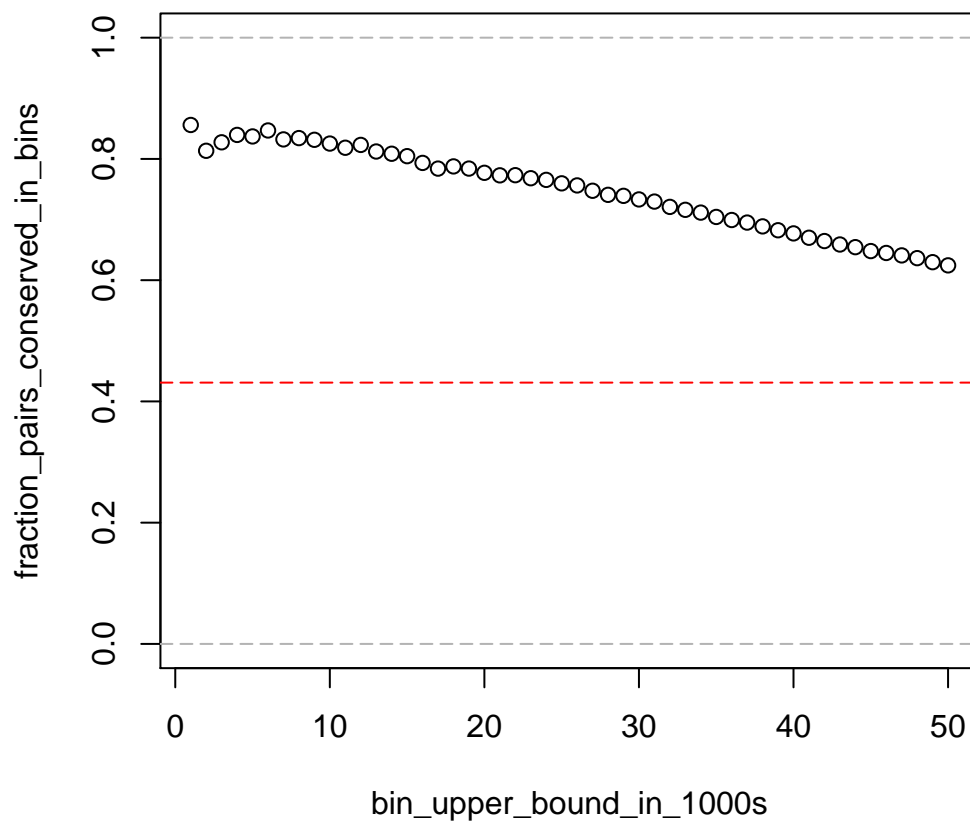

Supplement: s1 [file s1]

**Bin\_conservation\_minus\_bg\_CviKI\_vs\_MO0605SPH**  
**PD-0.697084**

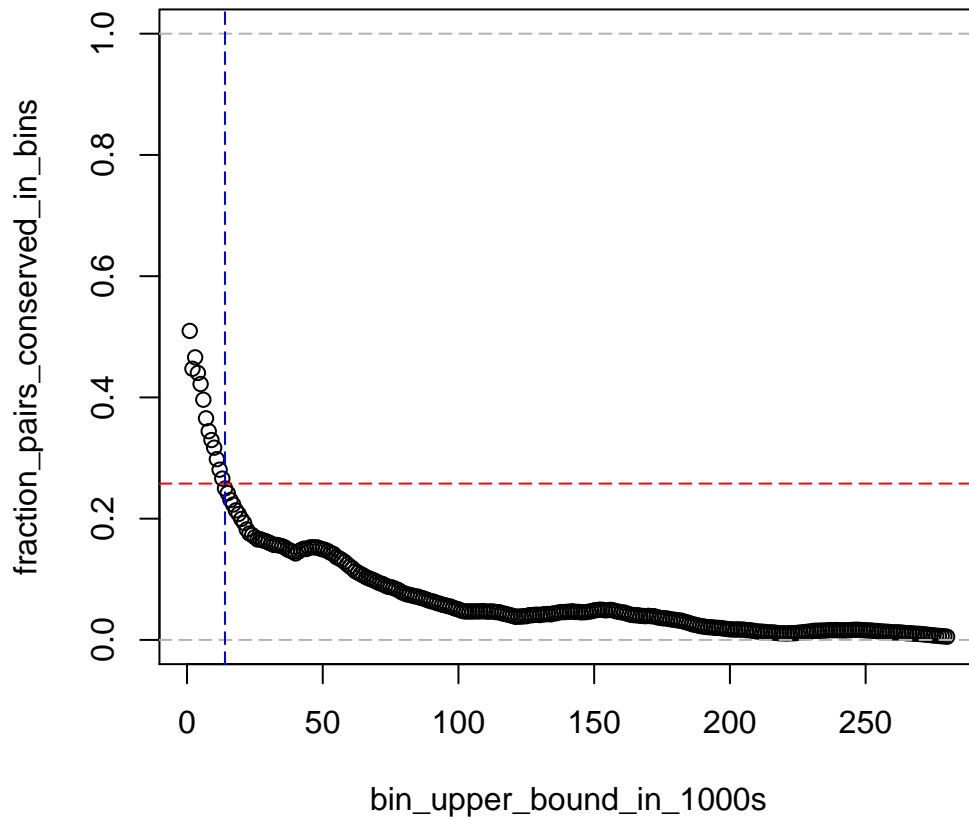

**Bin\_conservation\_minus\_bg\_CviKI\_vs\_MO0605SPH**  
**PD-0.697084**

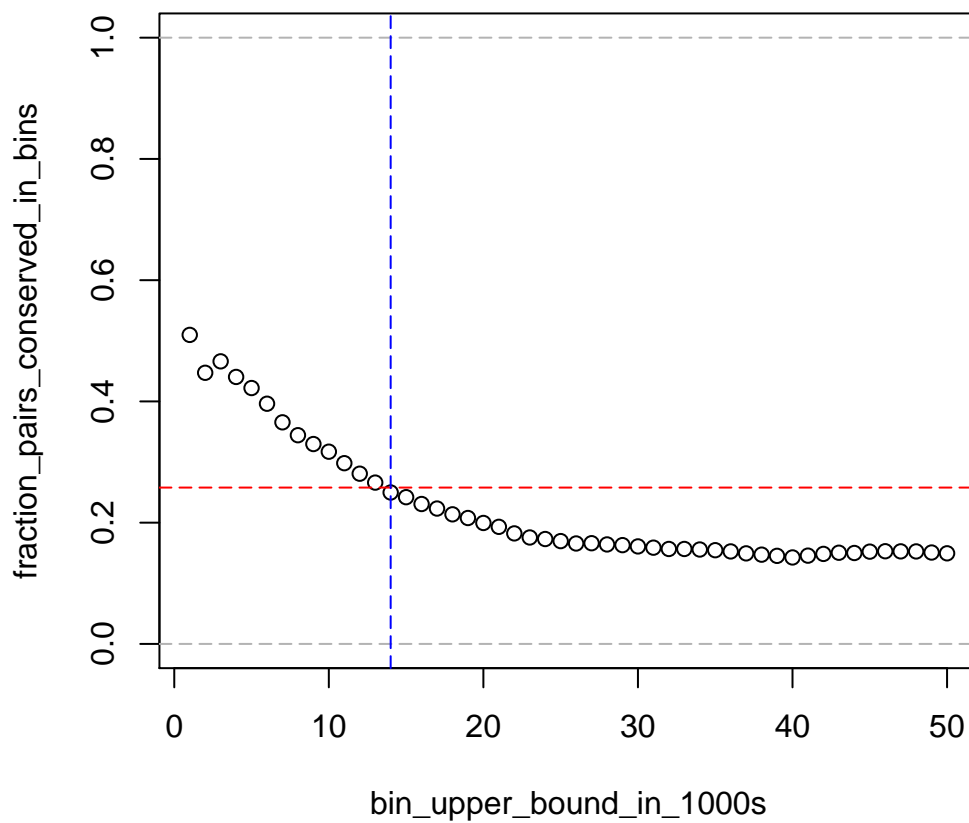

Supplement: s1 [file s1]

**Bin\_conservation\_minus\_bg\_CVR-1\_vs\_NE-JV-3**  
**PD-0.458195**

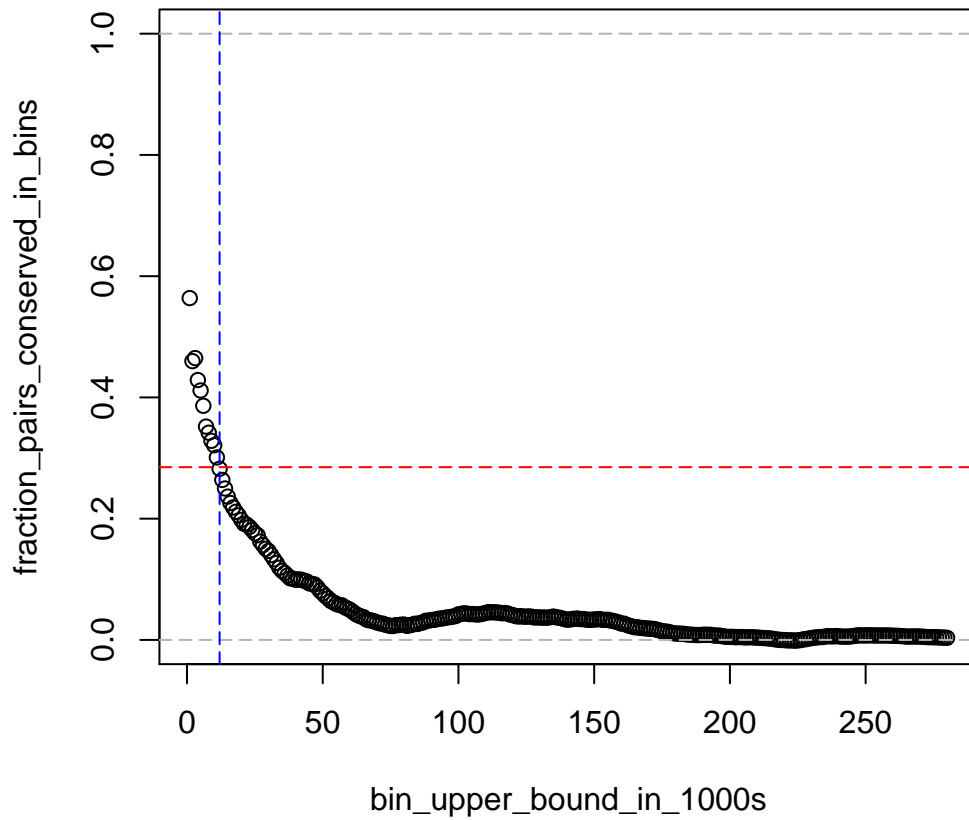

**Bin\_conservation\_minus\_bg\_CVR-1\_vs\_NE-JV-3**  
**PD-0.458195**

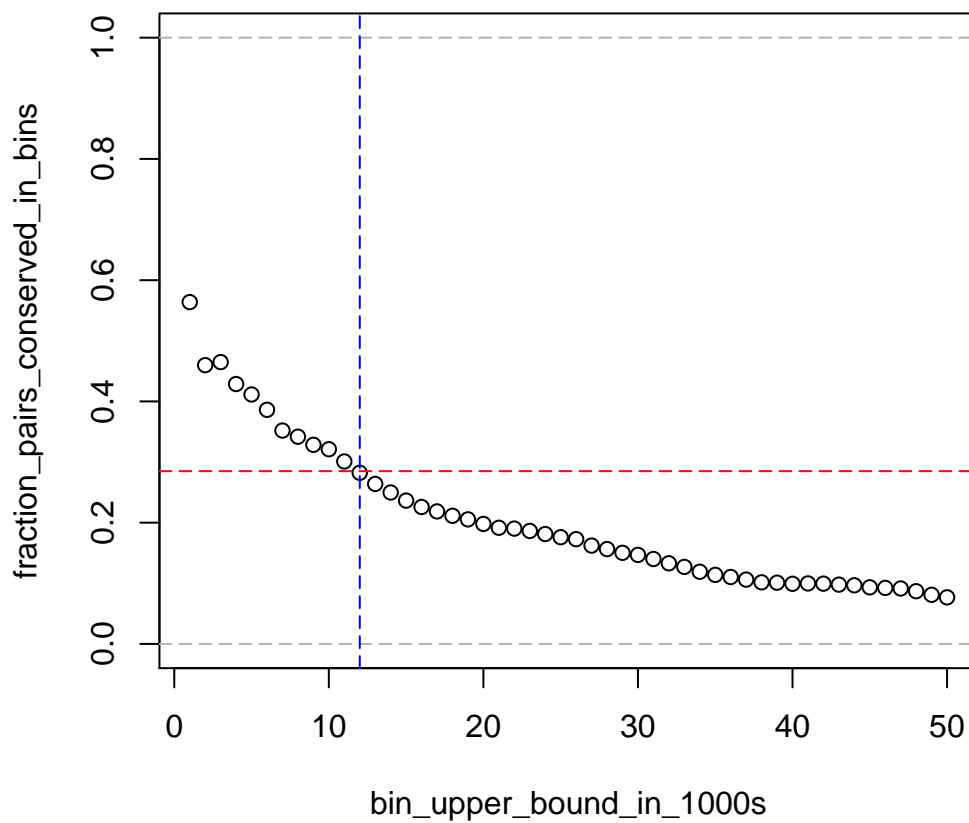

Supplement: s1 [file s1]

**Bin\_conservation\_minus\_bg\_MA-1D\_vs\_MT325**  
**PD-0.657773**

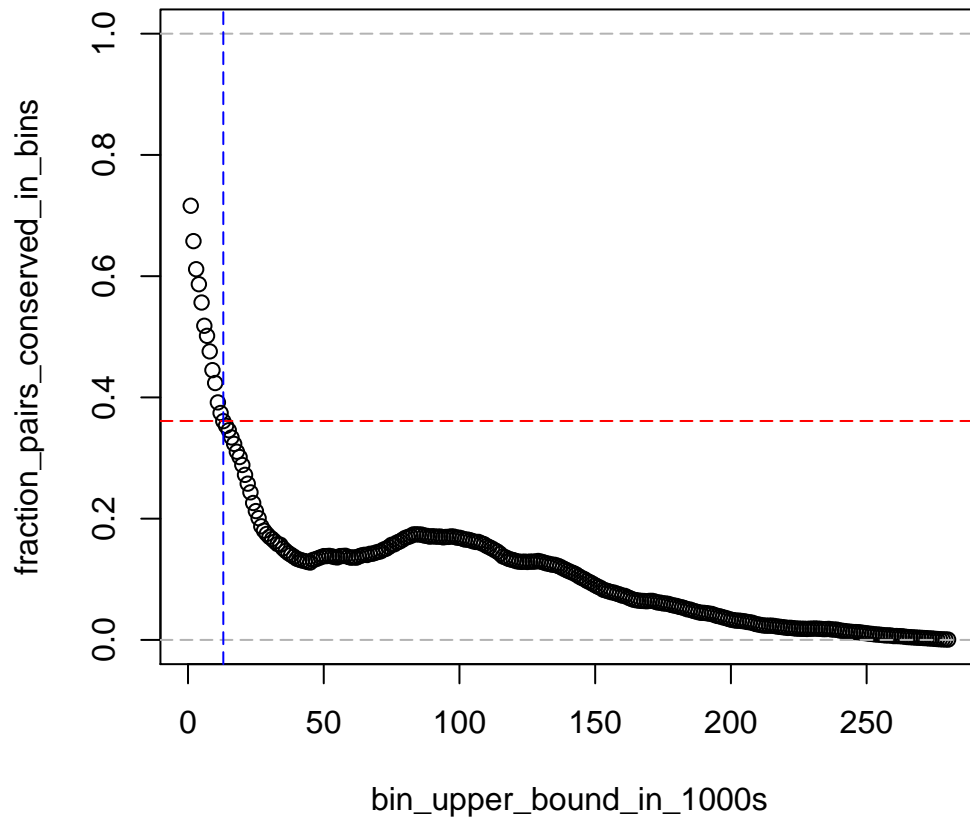

**Bin\_conservation\_minus\_bg\_MA-1D\_vs\_MT325**  
**PD-0.657773**

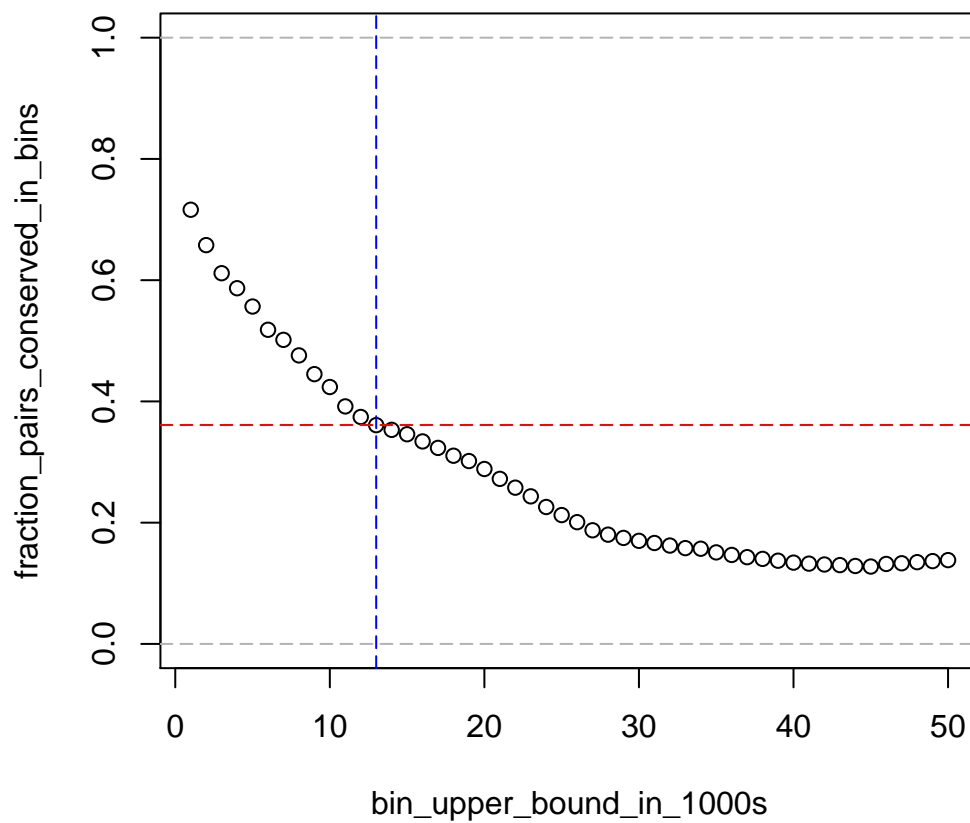

Supplement: s1 [file s1]

**Bin\_conservation\_minus\_bg\_CvsA1\_vs\_NE-JV-2**  
**PD-0.694567**

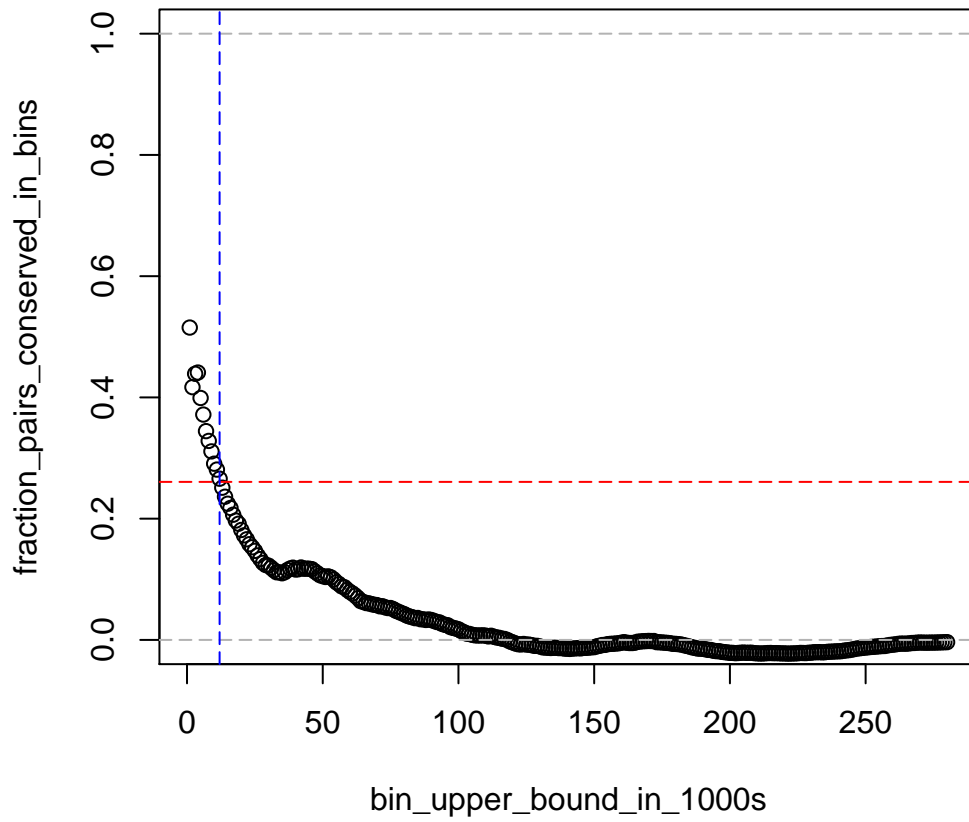

**Bin\_conservation\_minus\_bg\_CvsA1\_vs\_NE-JV-2**  
**PD-0.694567**

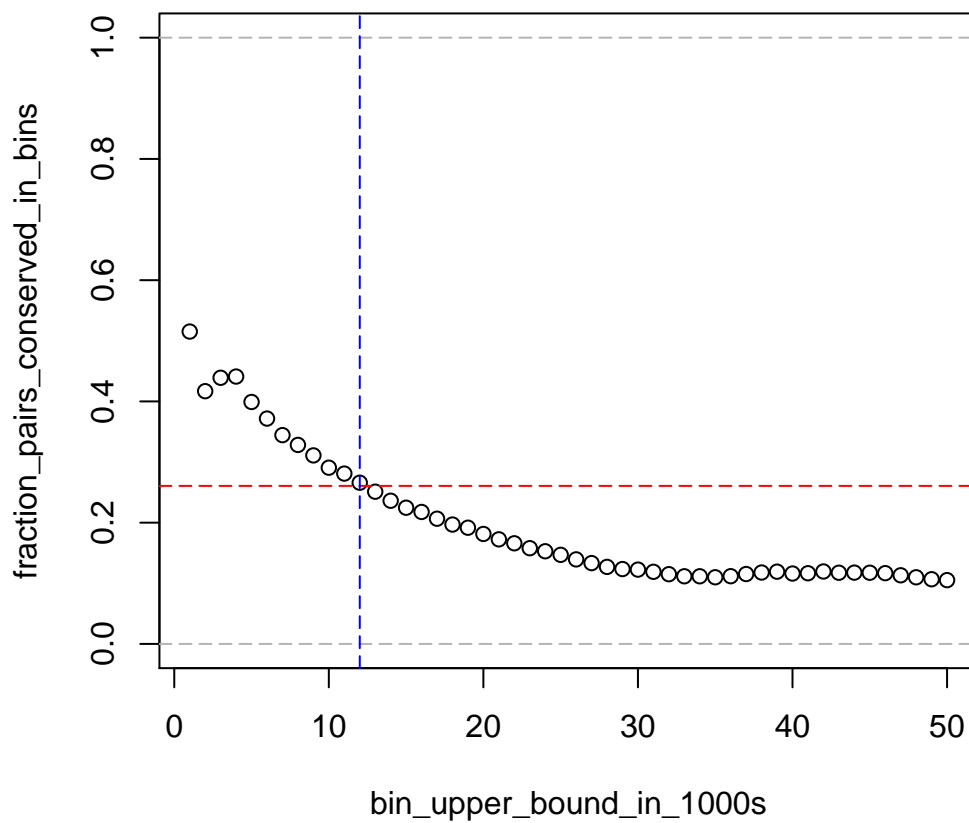

Supplement: s1 [file s1]

**Bin\_conservation\_minus\_bg\_OR0704.3\_vs\_PBCV1**  
**PD-0.677011**

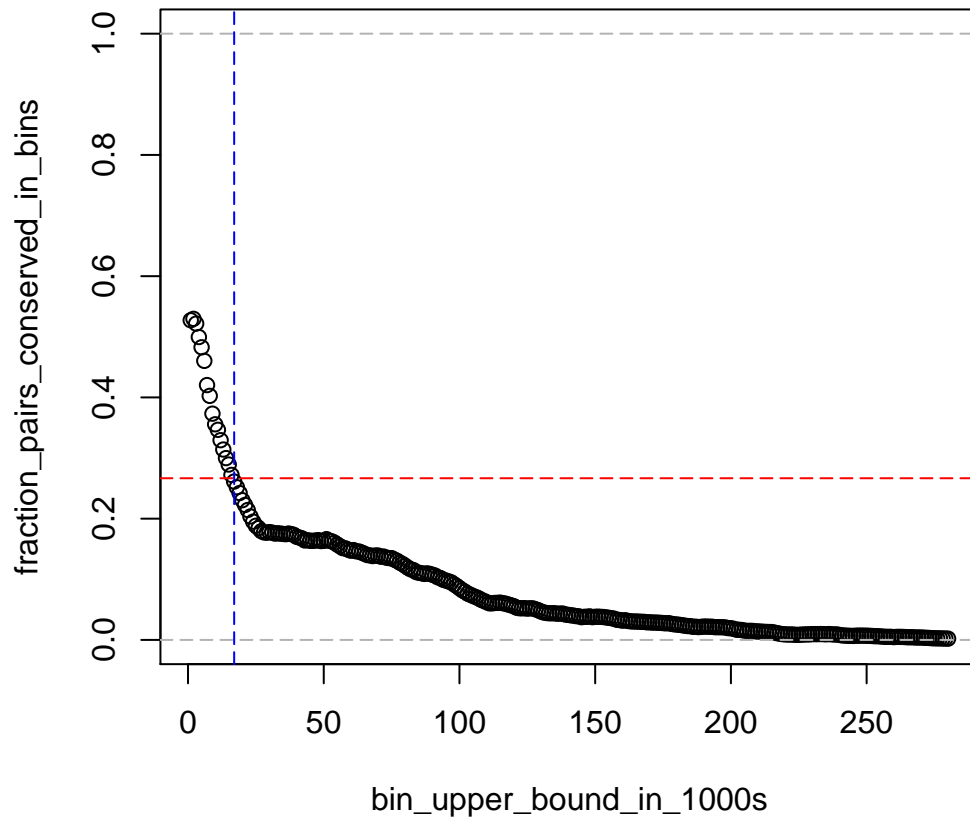

**Bin\_conservation\_minus\_bg\_OR0704.3\_vs\_PBCV1**  
**PD-0.677011**

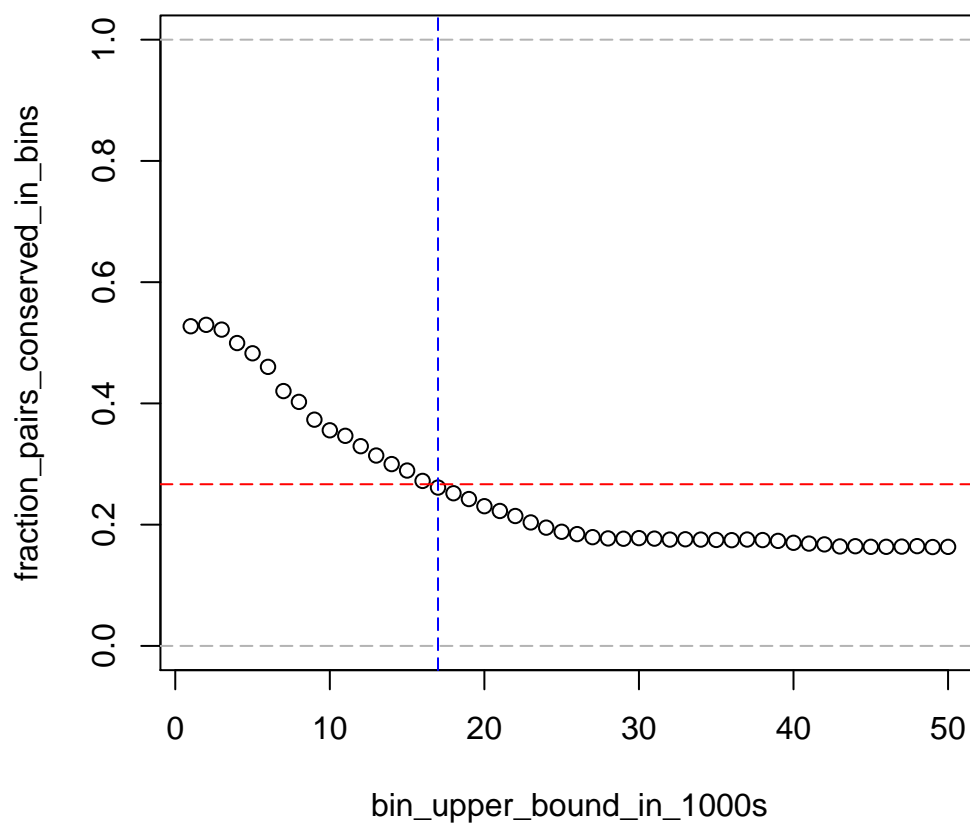

Supplement: s1 [file s1]

**Bin\_conservation\_minus\_bg\_NY2A\_vs\_NYs-1**  
**PD-0.051286**

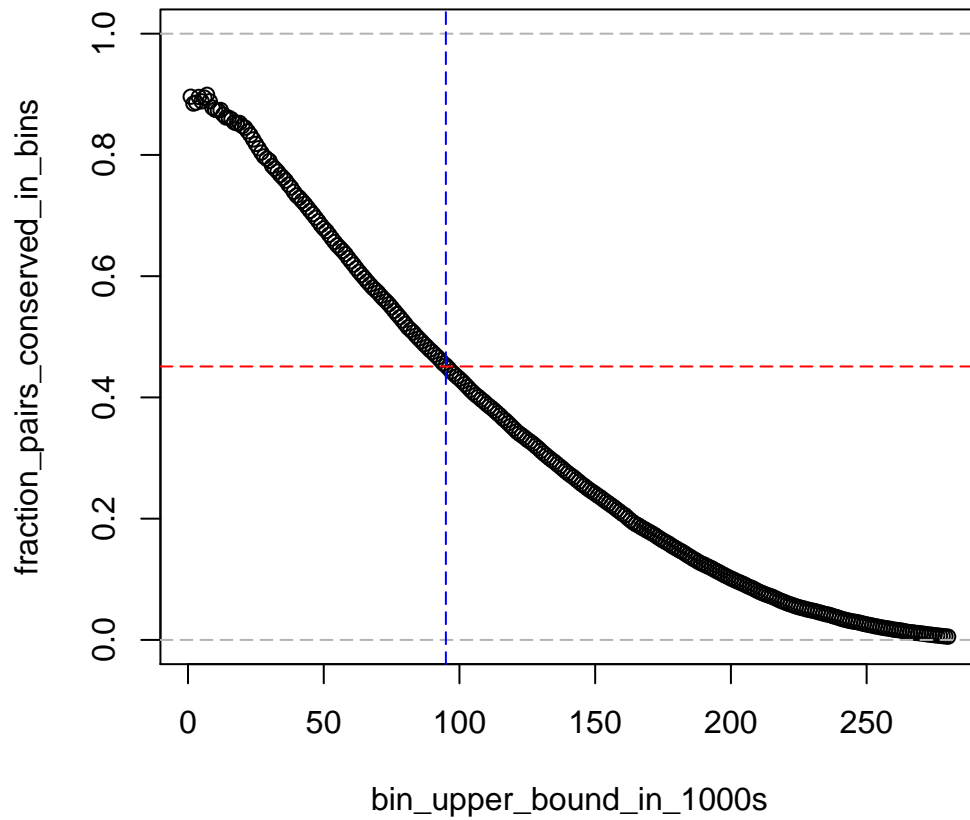

**Bin\_conservation\_minus\_bg\_NY2A\_vs\_NYs-1**  
**PD-0.051286**

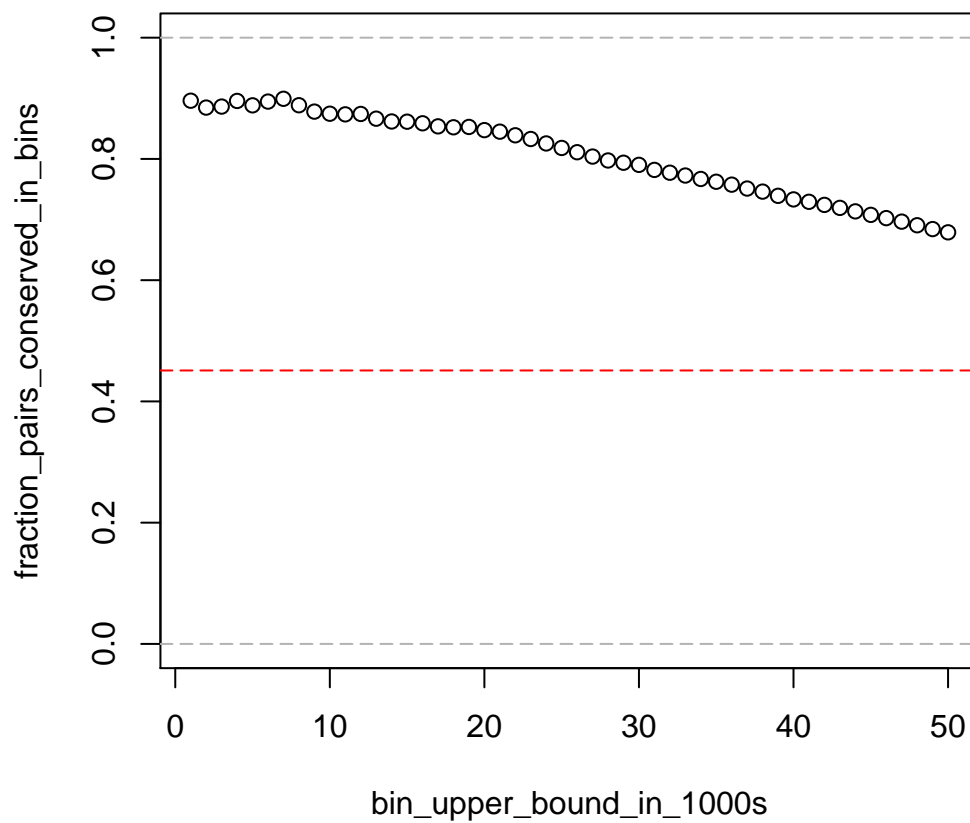

Supplement: s1 [file s1]

**Bin\_conservation\_minus\_bg\_IL-3A\_vs\_WI0606**  
**PD-0.685207**

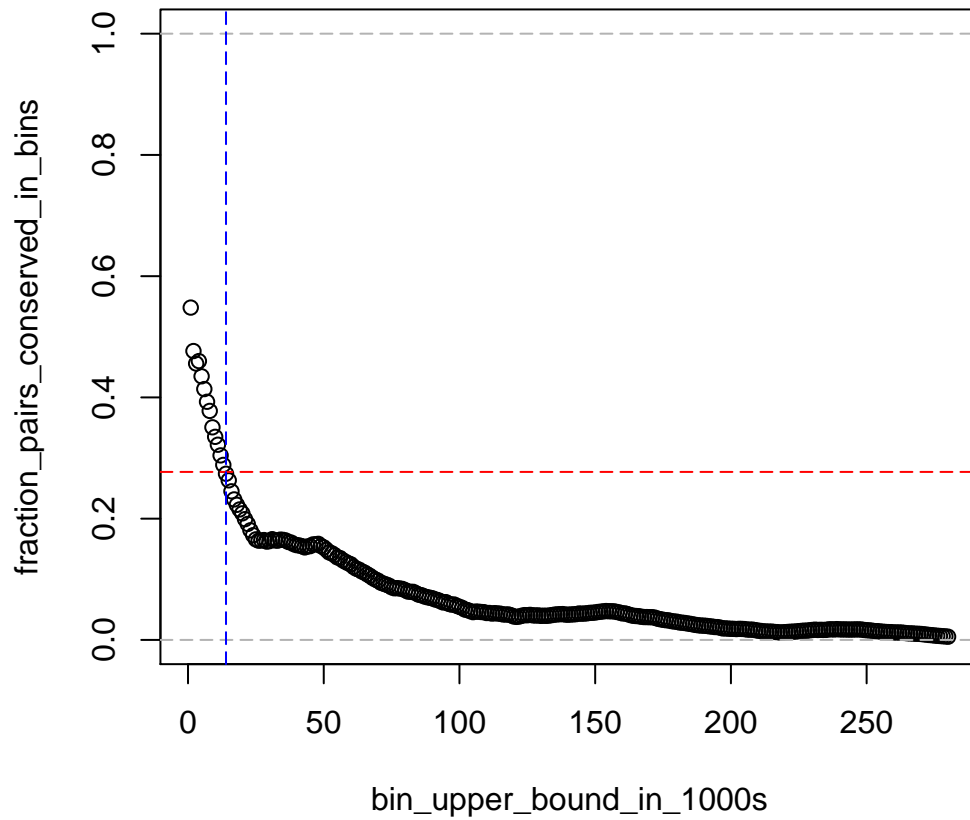

**Bin\_conservation\_minus\_bg\_IL-3A\_vs\_WI0606**  
**PD-0.685207**

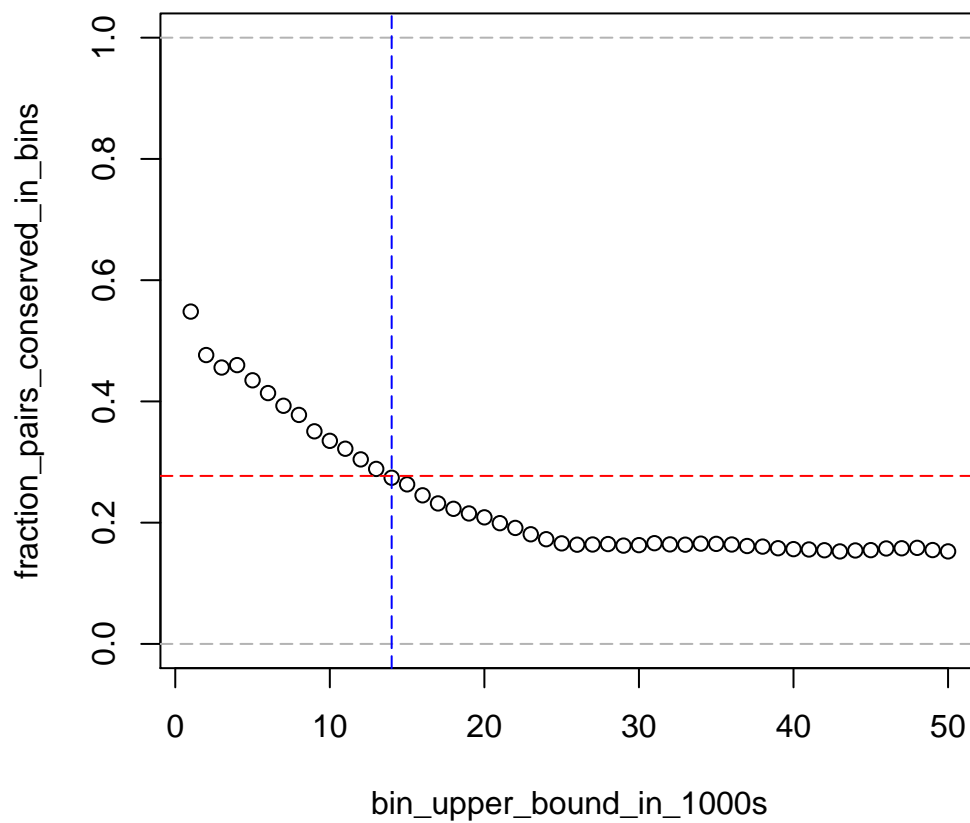

Supplement: s1 [file s1]

**Bin\_conservation\_minus\_bg\_Can0610SP\_vs\_MA-1E**  
**PD-0.694922**

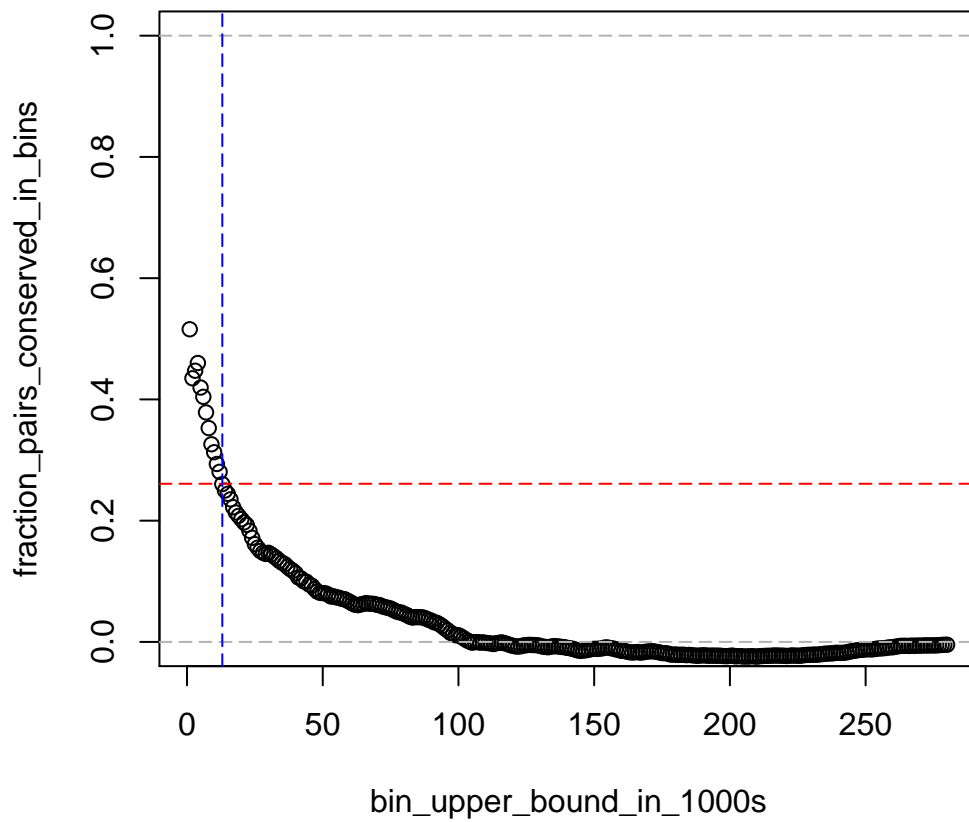

**Bin\_conservation\_minus\_bg\_Can0610SP\_vs\_MA-1E**  
**PD-0.694922**

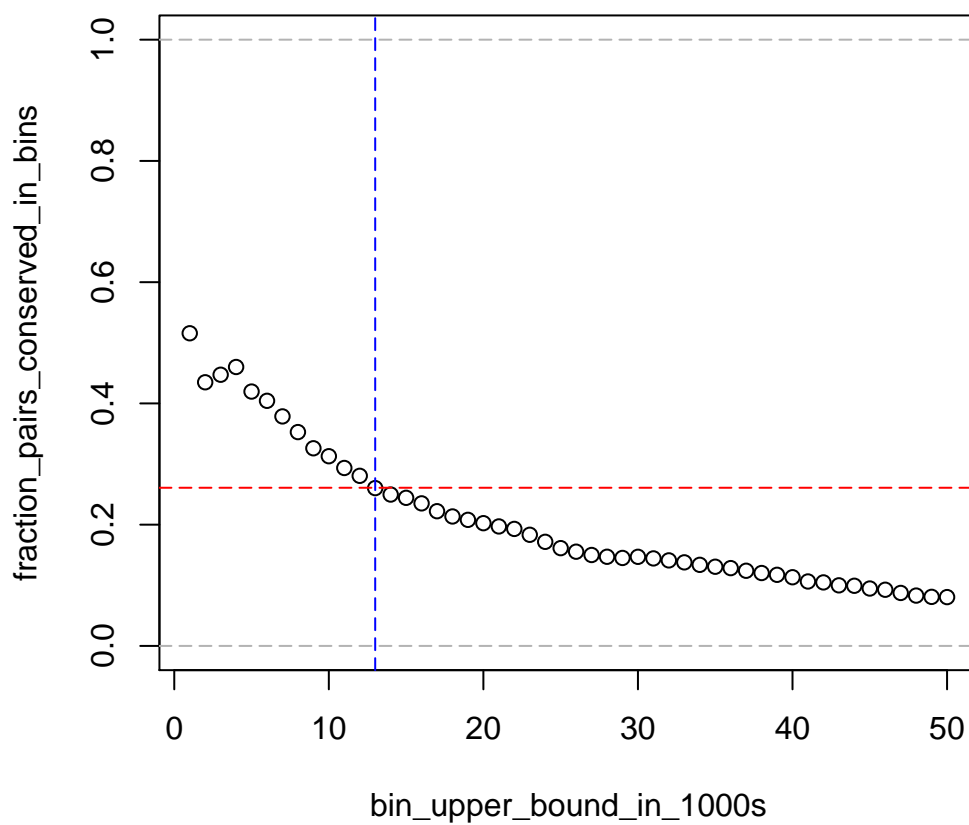

Supplement: s1 [file s1]

**Bin\_conservation\_minus\_bg\_FR483\_vs\_NE-JV-3**  
**PD-0.465671**

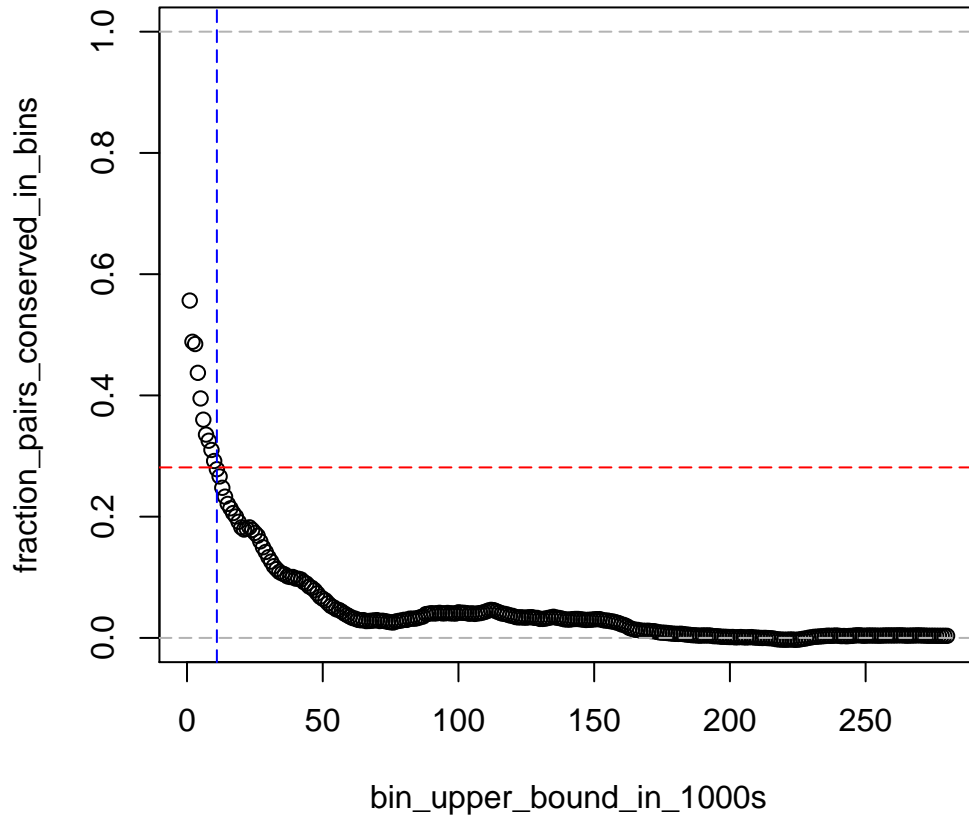

**Bin\_conservation\_minus\_bg\_FR483\_vs\_NE-JV-3**  
**PD-0.465671**

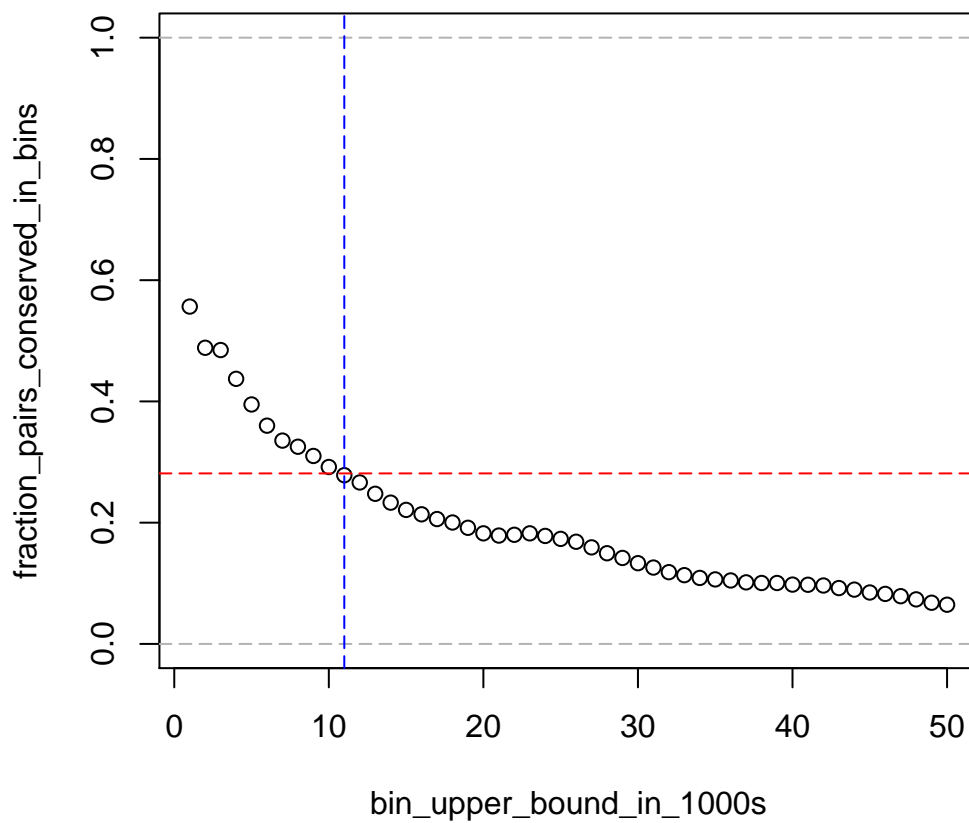

Supplement: s1 [file s1]

**Bin\_conservation\_minus\_bg\_CVR-1\_vs\_IL-3A**  
**PD-0.636701**

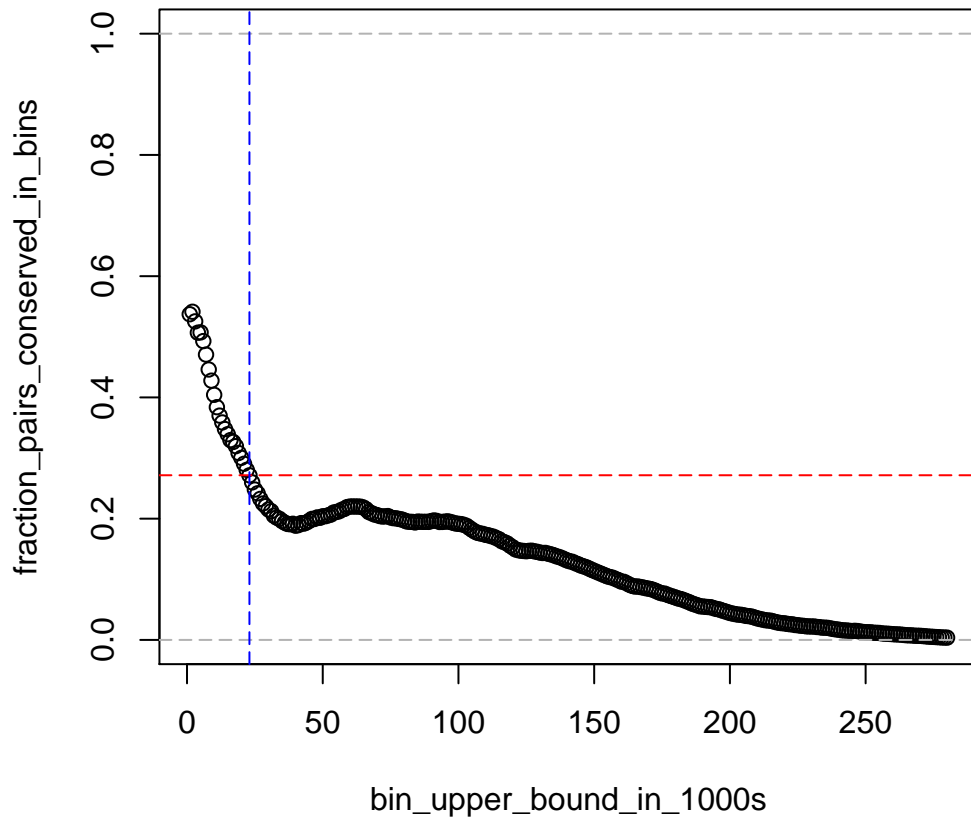

**Bin\_conservation\_minus\_bg\_CVR-1\_vs\_IL-3A**  
**PD-0.636701**

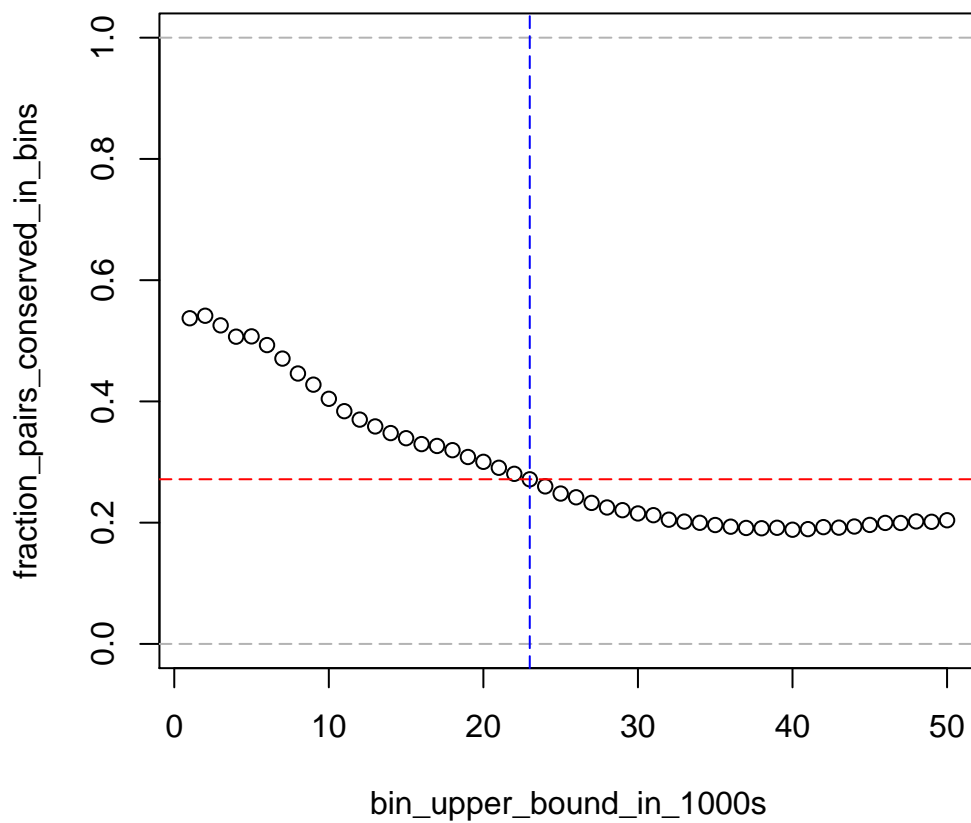

Supplement: s1 [file s1]
