# Supplementary figures and images for: Gene Gangs of the Chloroviruses: Conserved Clusters of Collinear Monocistronic Genes (part 3 of 9)
Source: MDPI journal article supplement (doi:10.3390/v10100576), 2018-10-20

**Bin\_conservation\_minus\_bg\_ATCV1\_vs\_NTS-1**  
**PD-0.047485**

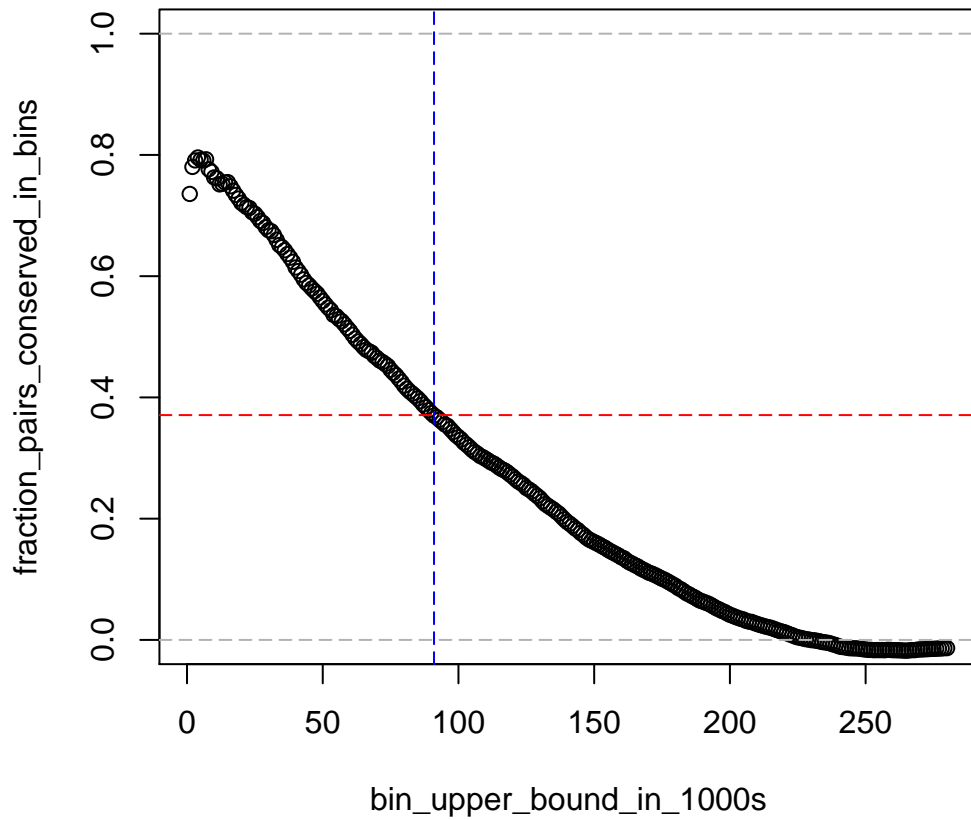

**Bin\_conservation\_minus\_bg\_ATCV1\_vs\_NTS-1**  
**PD-0.047485**

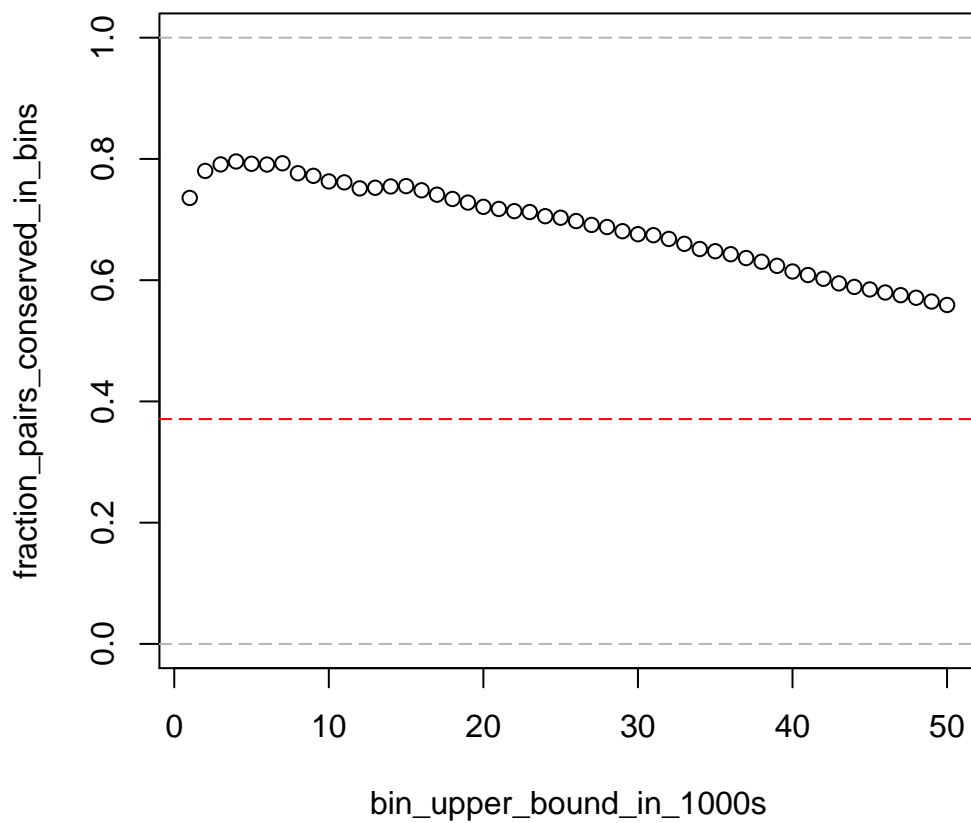

Supplement: s1 [file s1]

**Bin\_conservation\_minus\_bg\_CVA-1\_vs\_CZ-2**  
**PD-0.03921**

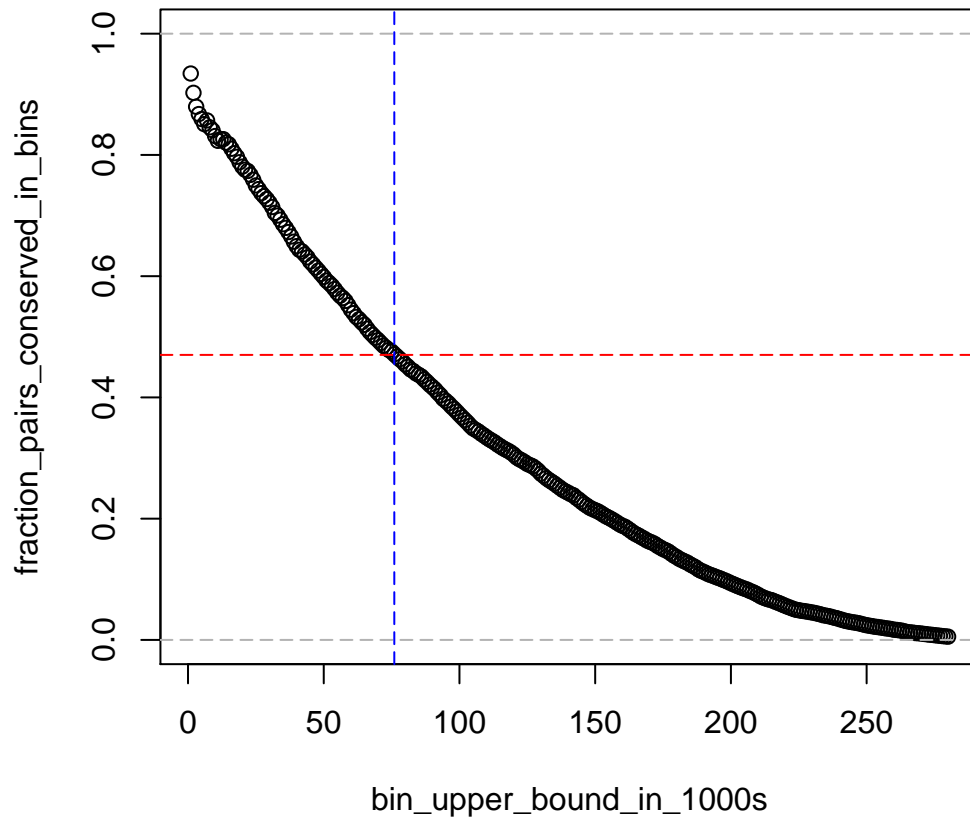

**Bin\_conservation\_minus\_bg\_CVA-1\_vs\_CZ-2**  
**PD-0.03921**

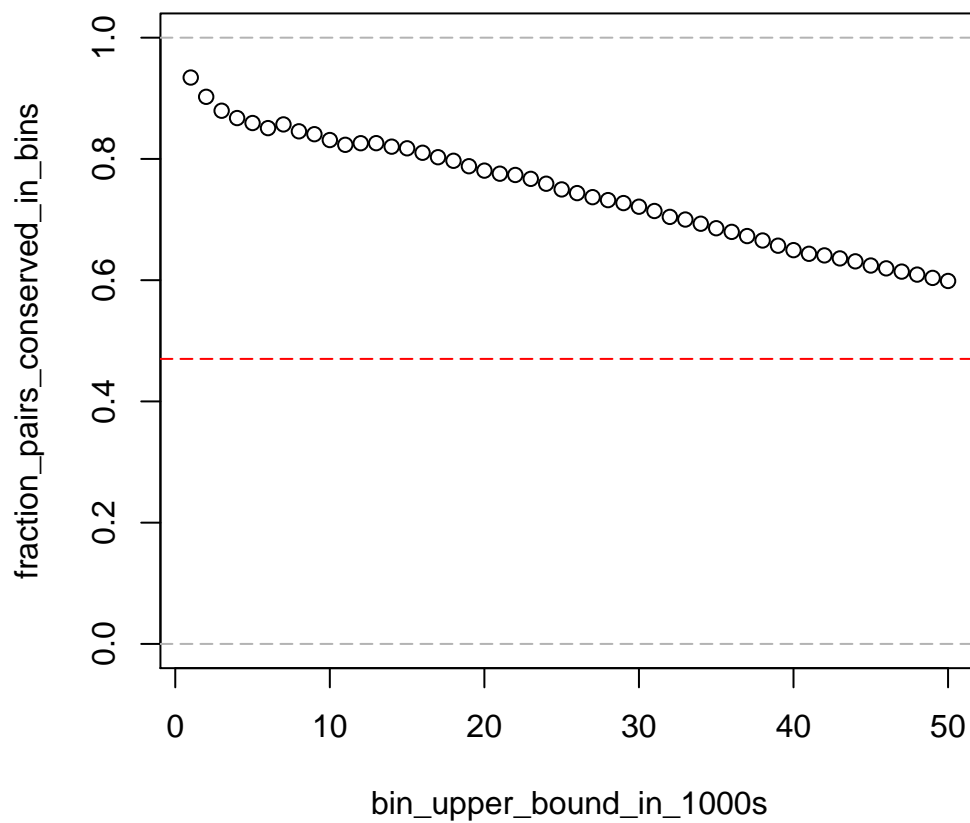

Supplement: s1 [file s1]

**Bin\_conservation\_minus\_bg\_NE-JV-2\_vs\_NE-JV-3**  
**PD-0.011651**

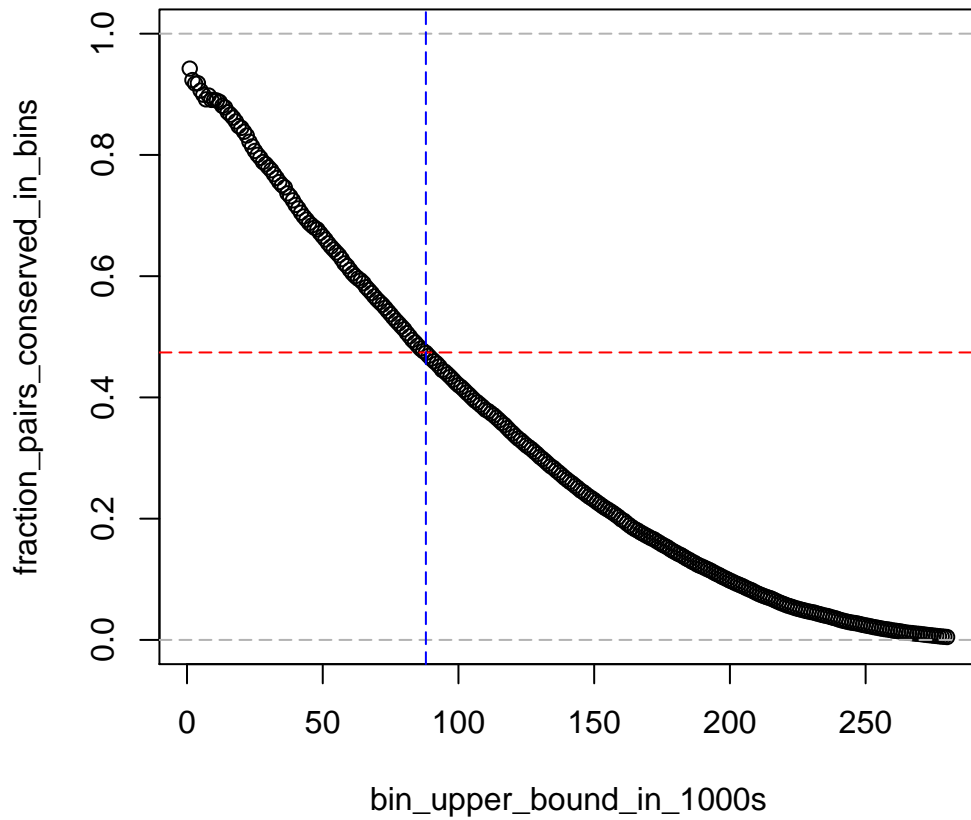

**Bin\_conservation\_minus\_bg\_NE-JV-2\_vs\_NE-JV-3**  
**PD-0.011651**

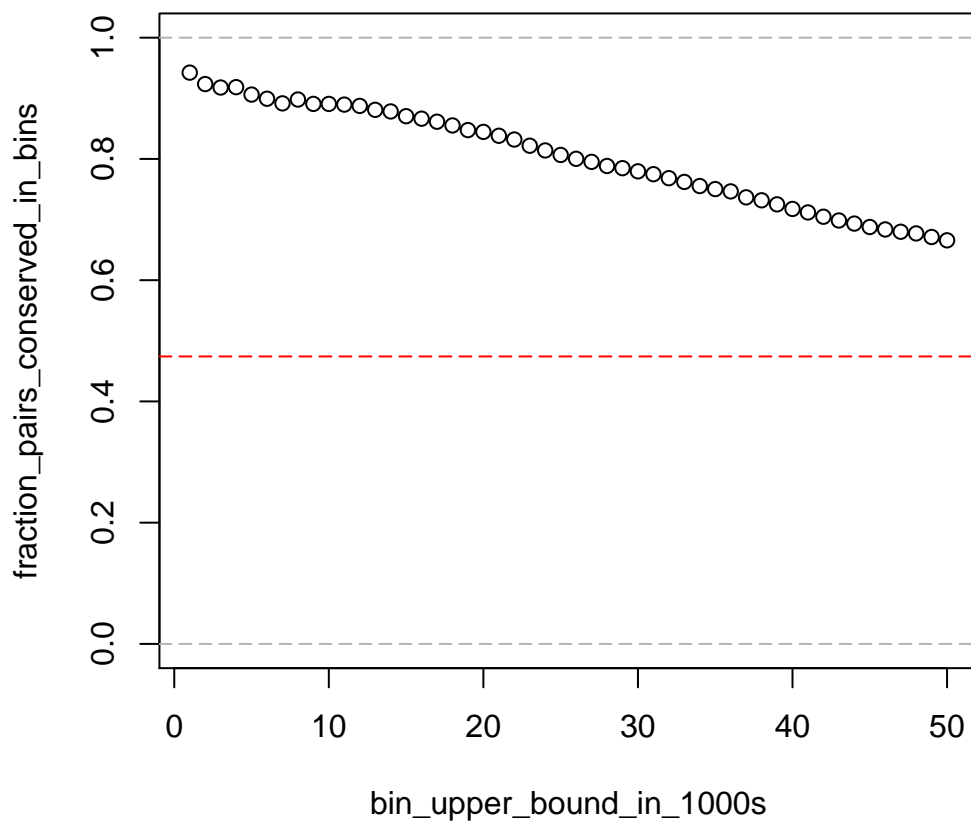

Supplement: s1 [file s1]

**Bin\_conservation\_minus\_bg\_AP110A\_vs\_MO0605SPH**  
**PD-0.466071**

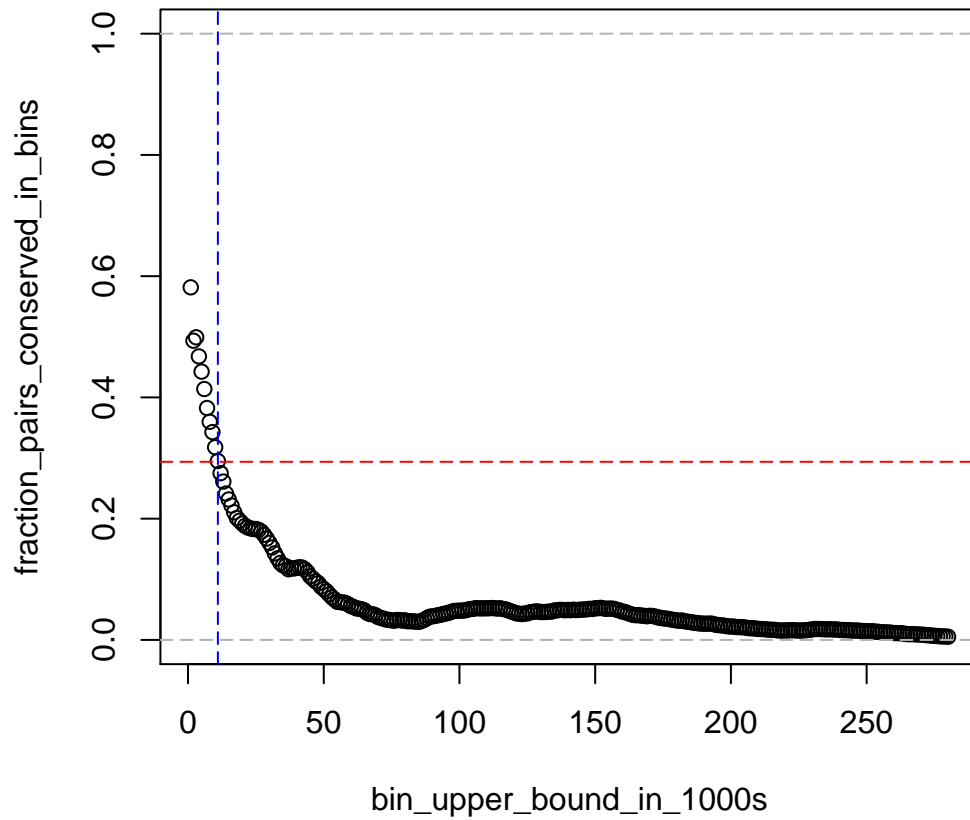

**Bin\_conservation\_minus\_bg\_AP110A\_vs\_MO0605SPH**  
**PD-0.466071**

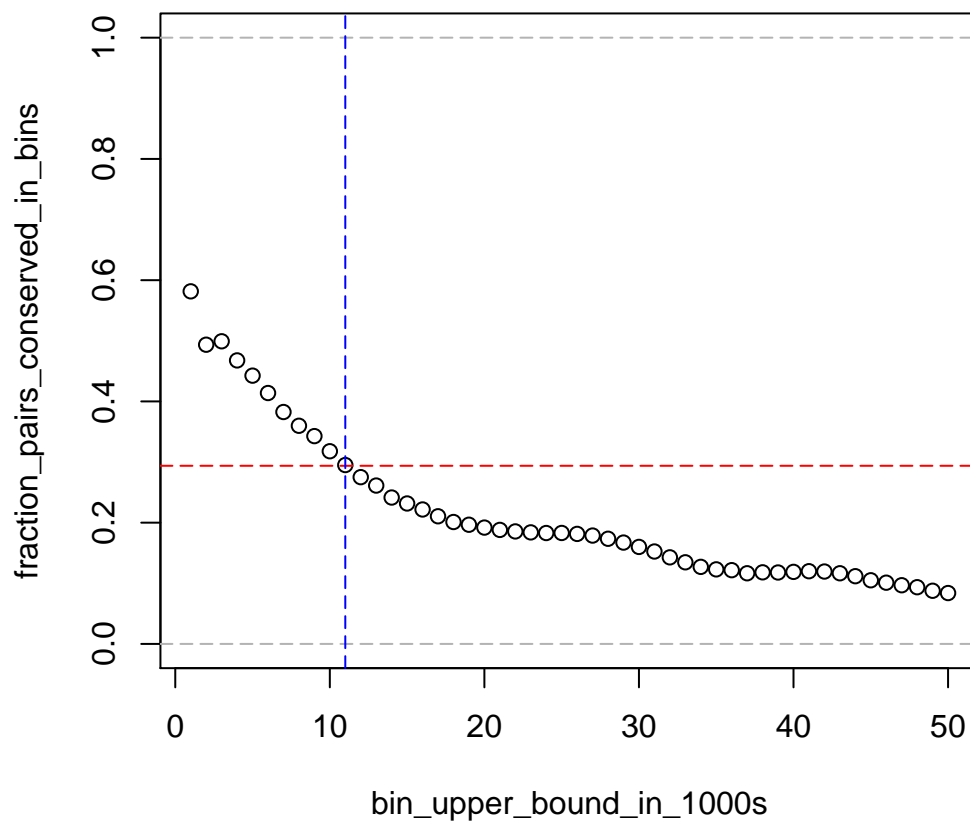

Supplement: s1 [file s1]

**Bin\_conservation\_minus\_bg\_AP110A\_vs\_CviKI**  
**PD-0.654035**

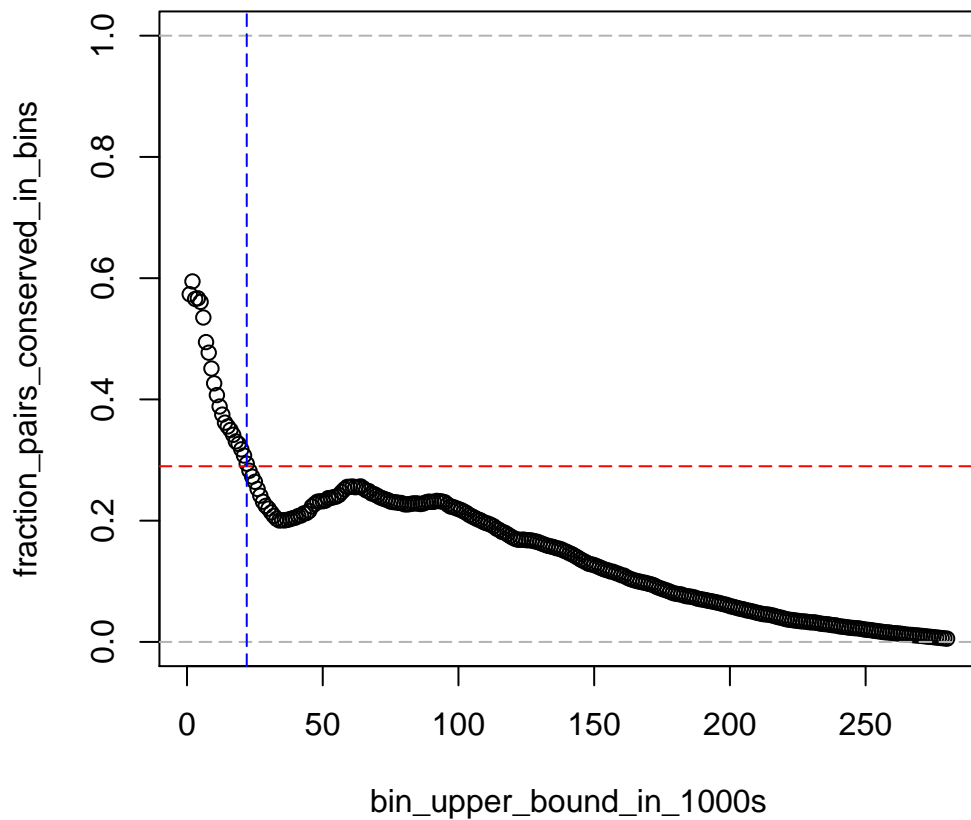

**Bin\_conservation\_minus\_bg\_AP110A\_vs\_CviKI**  
**PD-0.654035**

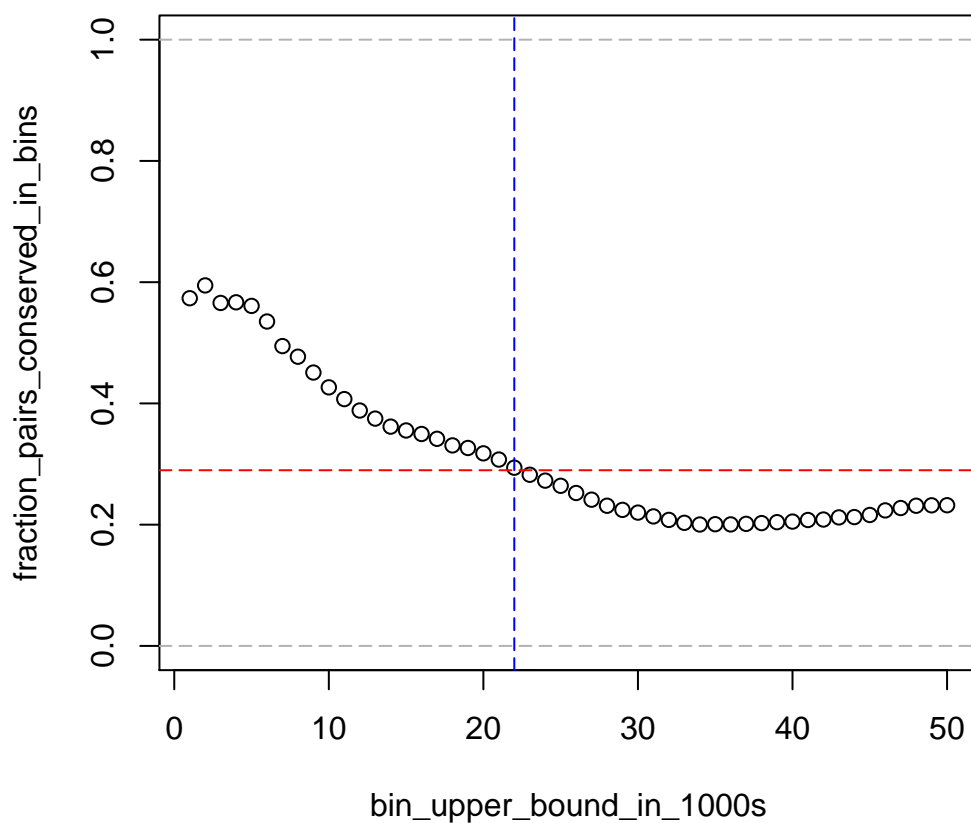

Supplement: s1 [file s1]

**Bin\_conservation\_minus\_bg\_NW665.2\_vs\_NYs-1**  
**PD-0.663787**

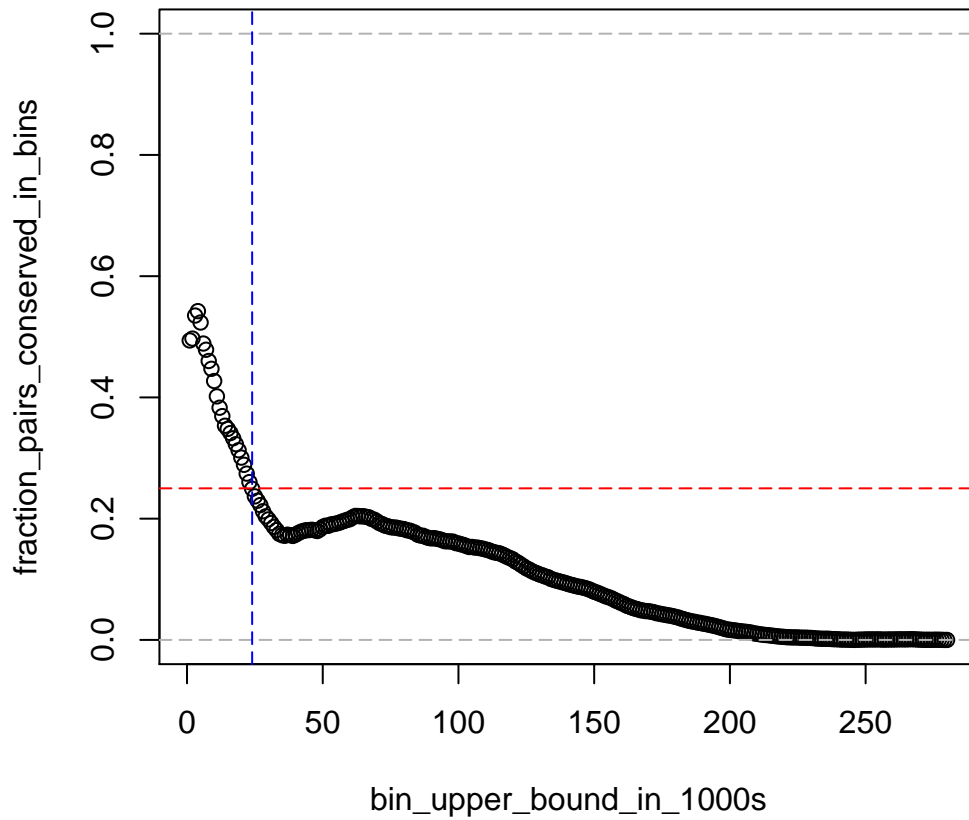

**Bin\_conservation\_minus\_bg\_NW665.2\_vs\_NYs-1**  
**PD-0.663787**

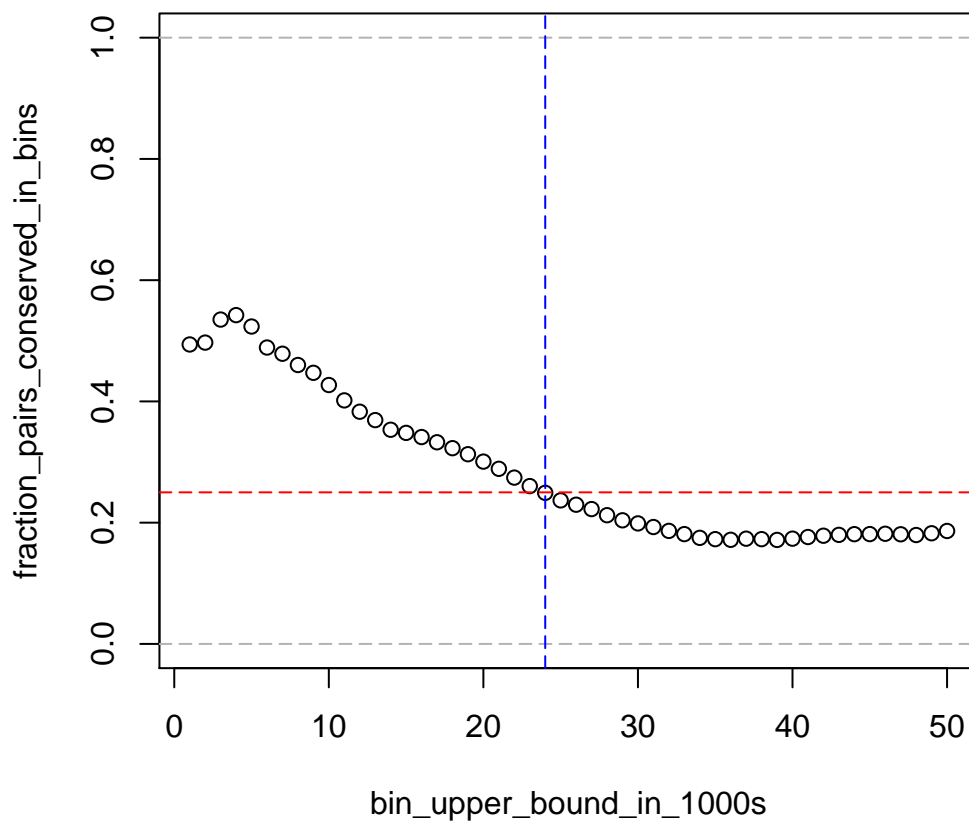

Supplement: s1 [file s1]

**Bin\_conservation\_minus\_bg\_AR158\_vs\_CZ-2**  
**PD-0.668344**

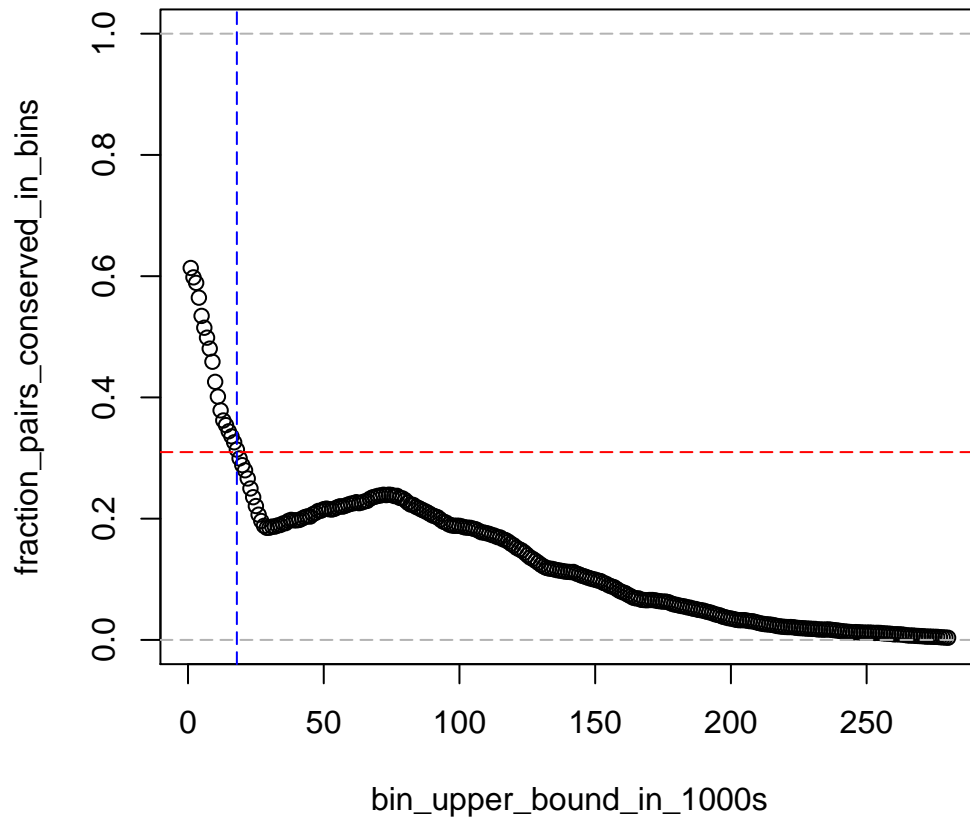

**Bin\_conservation\_minus\_bg\_AR158\_vs\_CZ-2**  
**PD-0.668344**

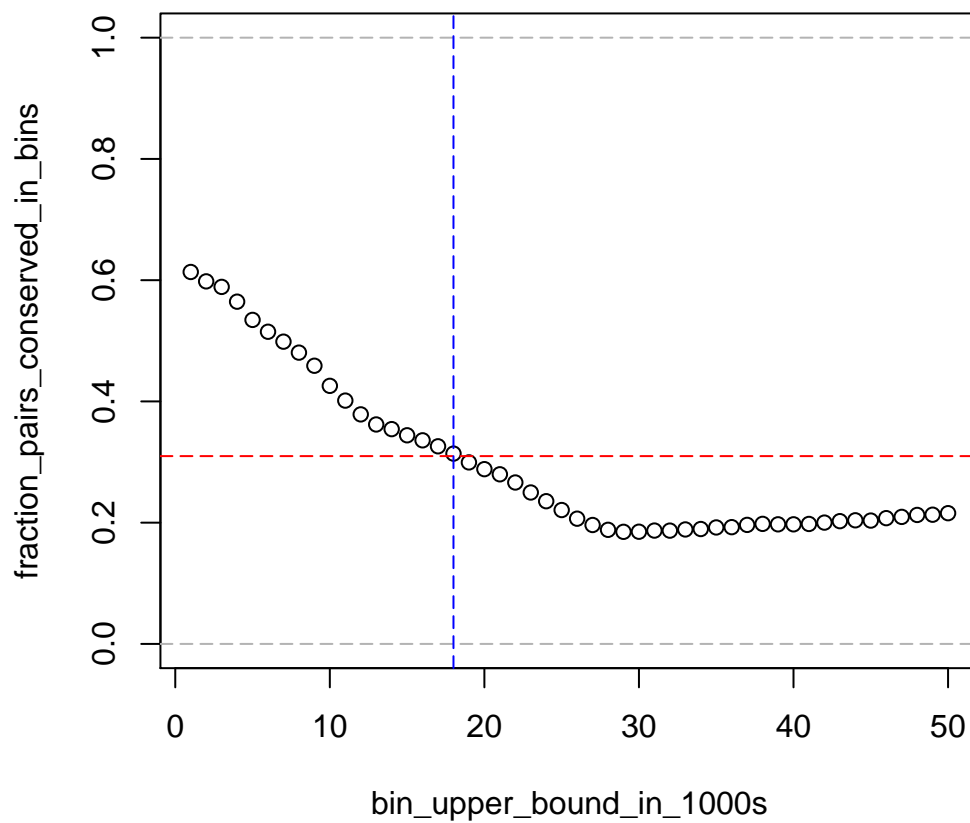

Supplement: s1 [file s1]

**Bin\_conservation\_minus\_bg\_Br0604L\_vs\_OR0704.2.2**  
**PD-0.448658**

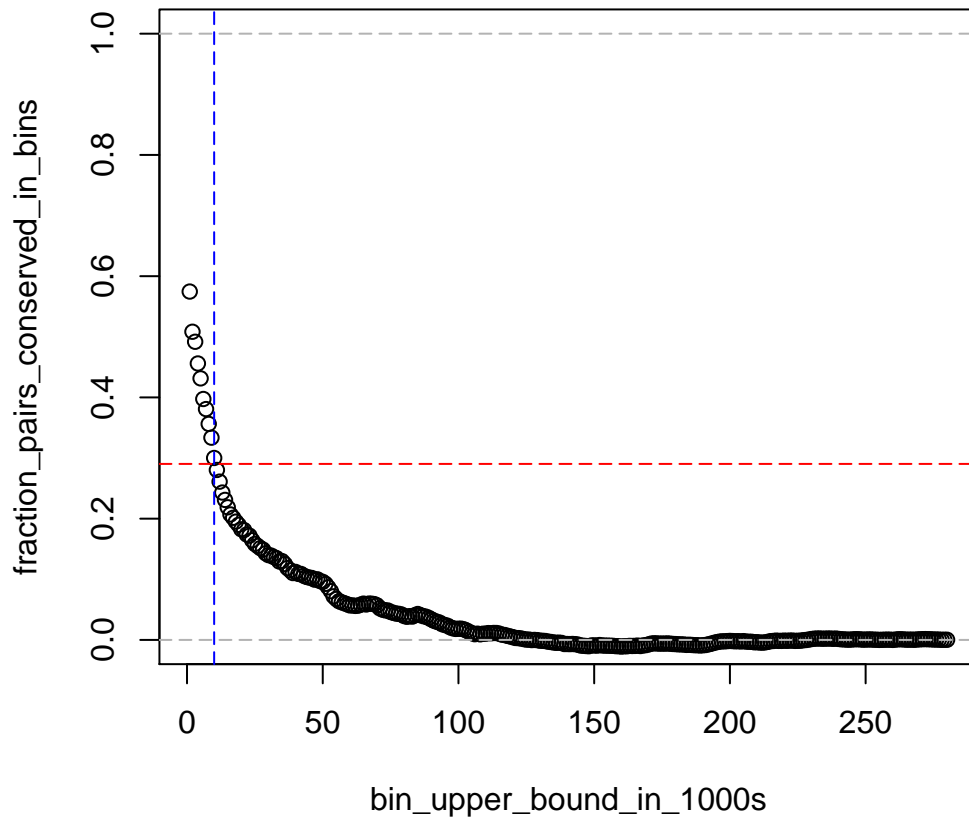

**Bin\_conservation\_minus\_bg\_Br0604L\_vs\_OR0704.2.2**  
**PD-0.448658**

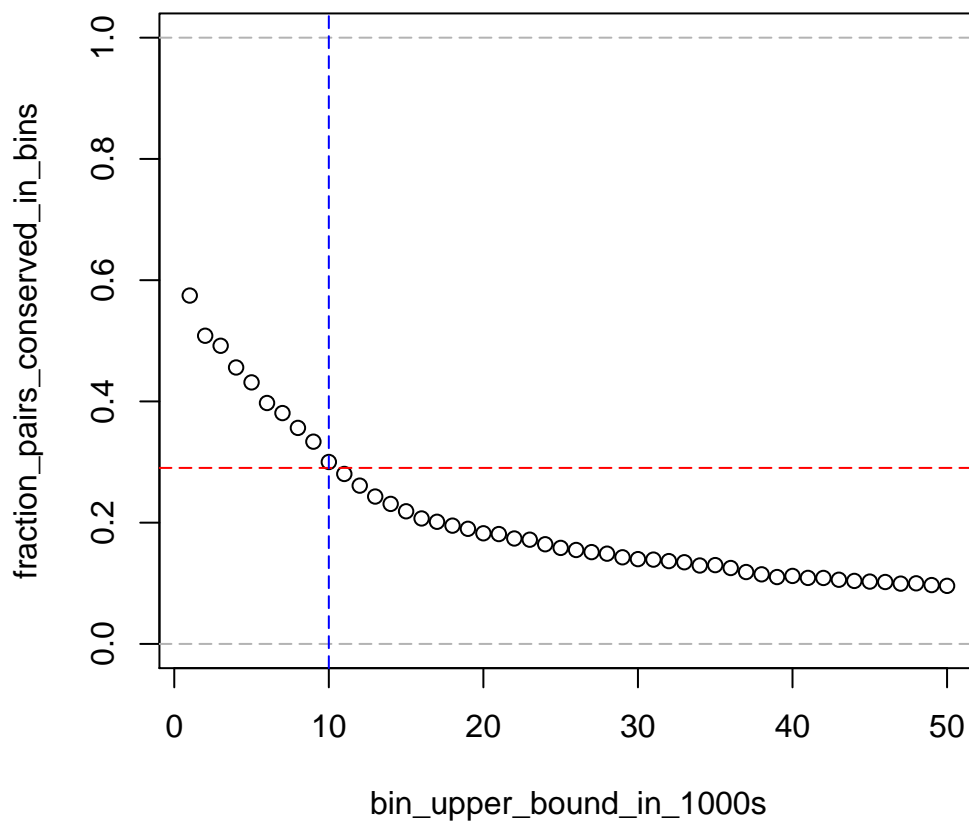

Supplement: s1 [file s1]

**Bin\_conservation\_minus\_bg\_CviKI\_vs\_MN0810.1**  
**PD-0.691309**

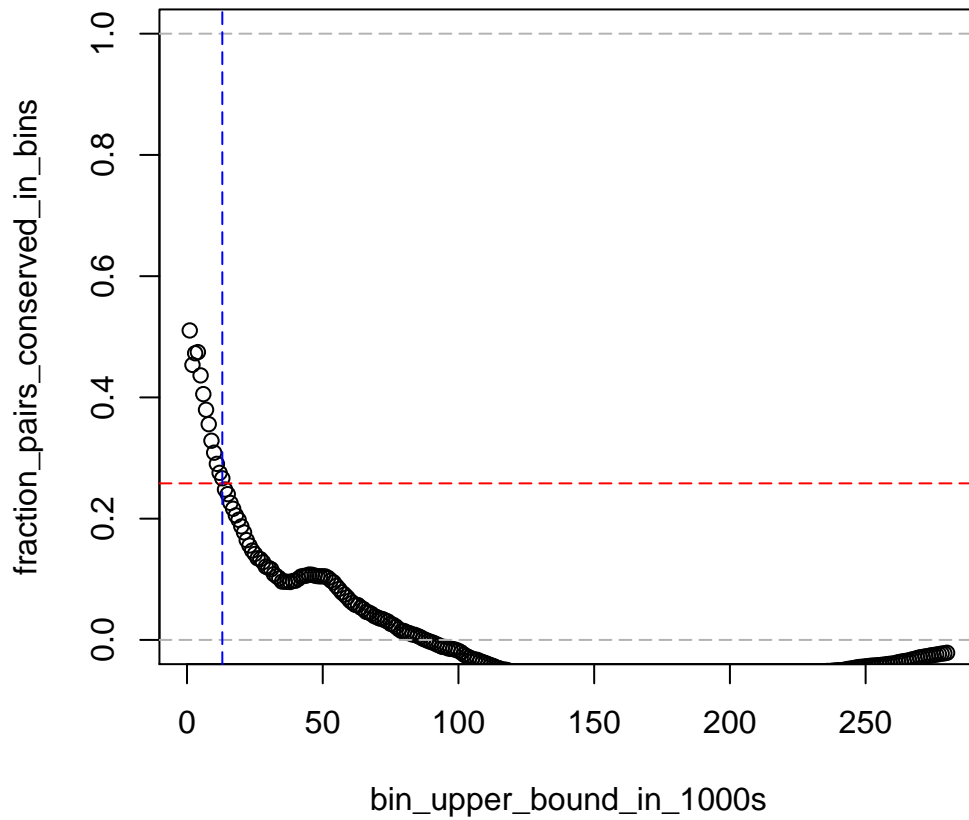

**Bin\_conservation\_minus\_bg\_CviKI\_vs\_MN0810.1**  
**PD-0.691309**

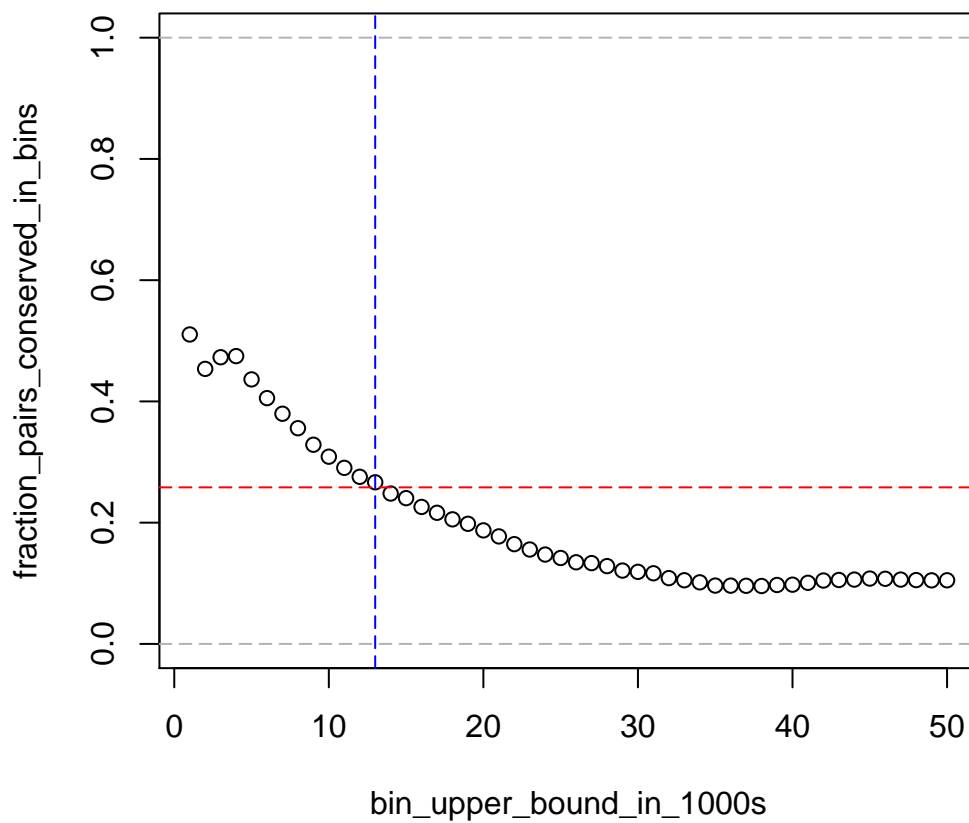

Supplement: s1 [file s1]

**Bin\_conservation\_minus\_bg\_Canal-1\_vs\_CVG-1**  
**PD-0.462446**

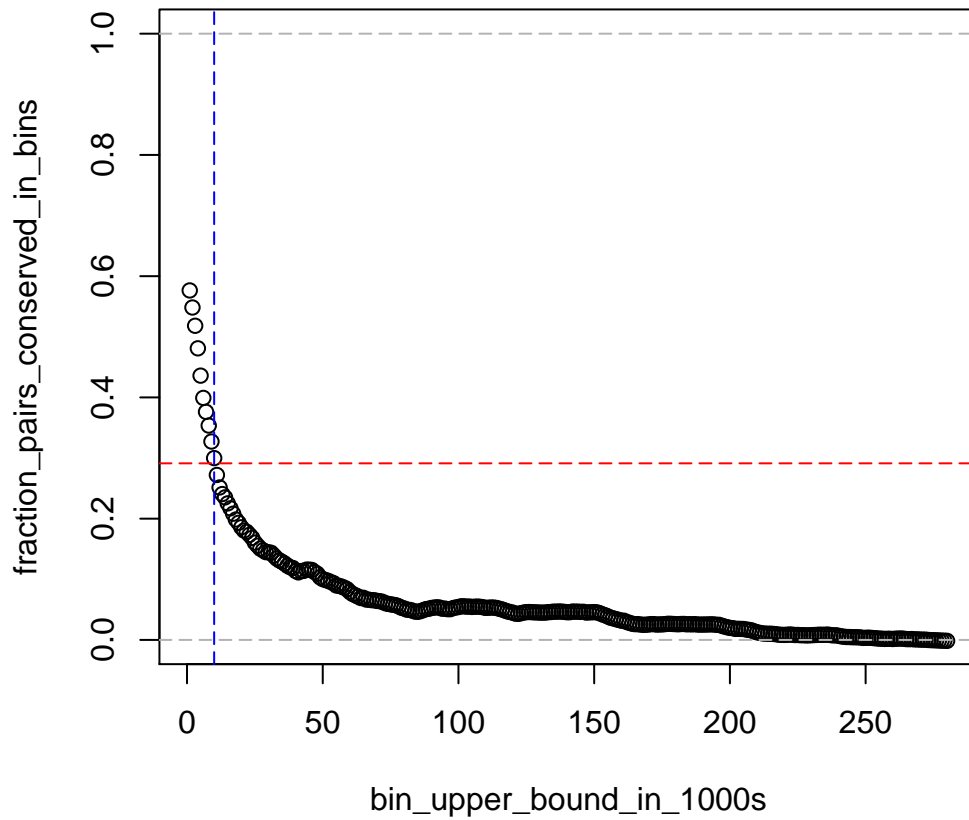

**Bin\_conservation\_minus\_bg\_Canal-1\_vs\_CVG-1**  
**PD-0.462446**

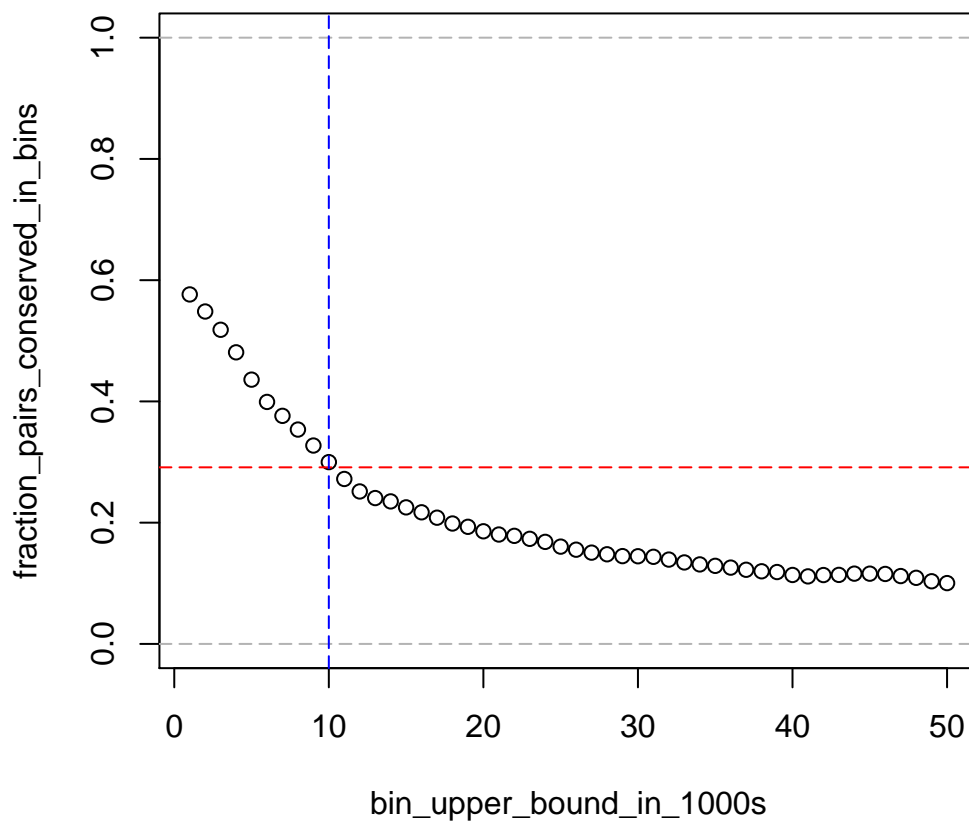

Supplement: s1 [file s1]

**Bin\_conservation\_minus\_bg\_GM0701.1\_vs\_IL-3A**  
**PD-0.670899**

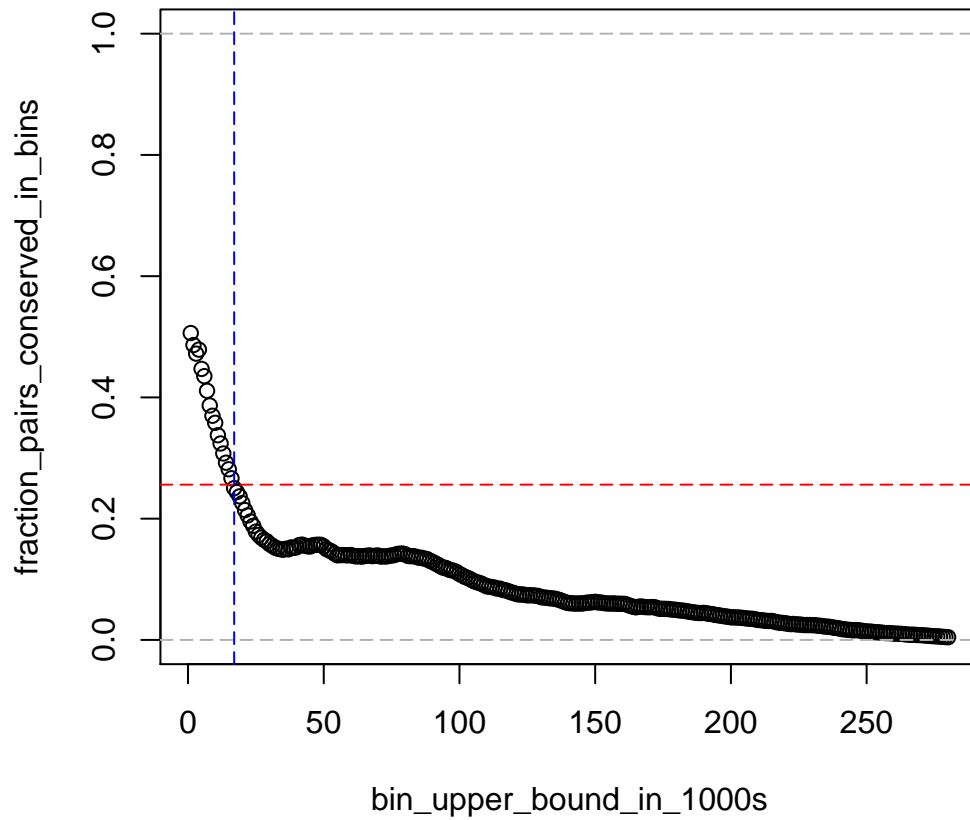

**Bin\_conservation\_minus\_bg\_GM0701.1\_vs\_IL-3A**  
**PD-0.670899**

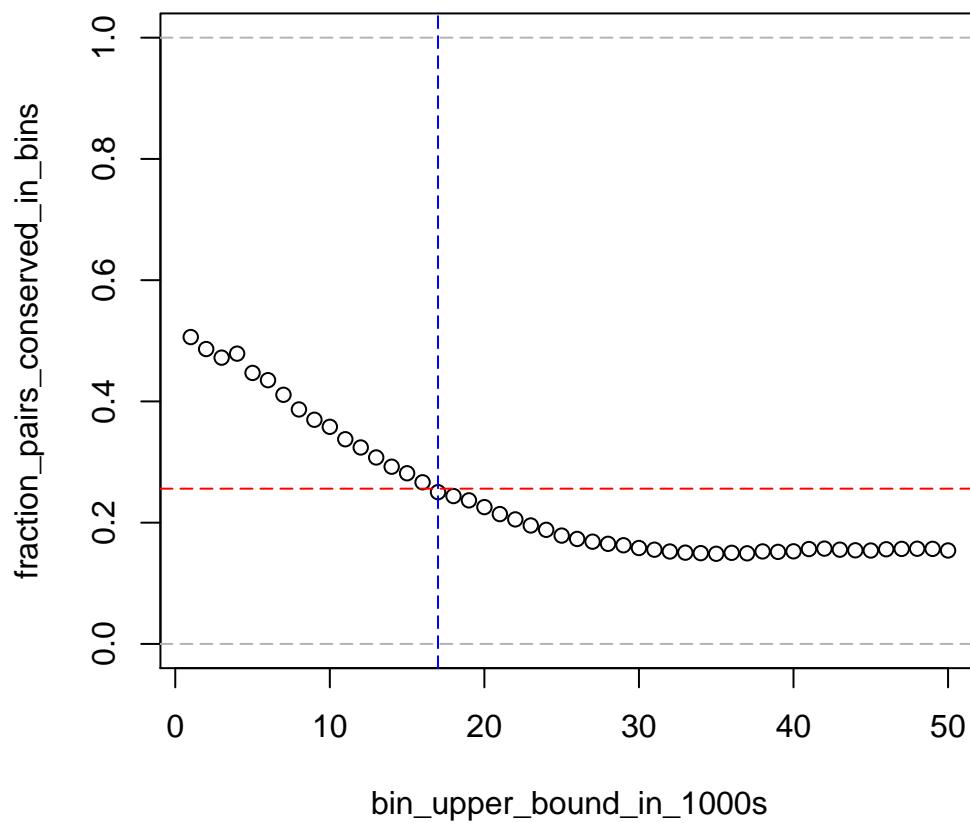

Supplement: s1 [file s1]

**Bin\_conservation\_minus\_bg\_Br0604L\_vs\_OR0704.3**  
**PD-0.061632**

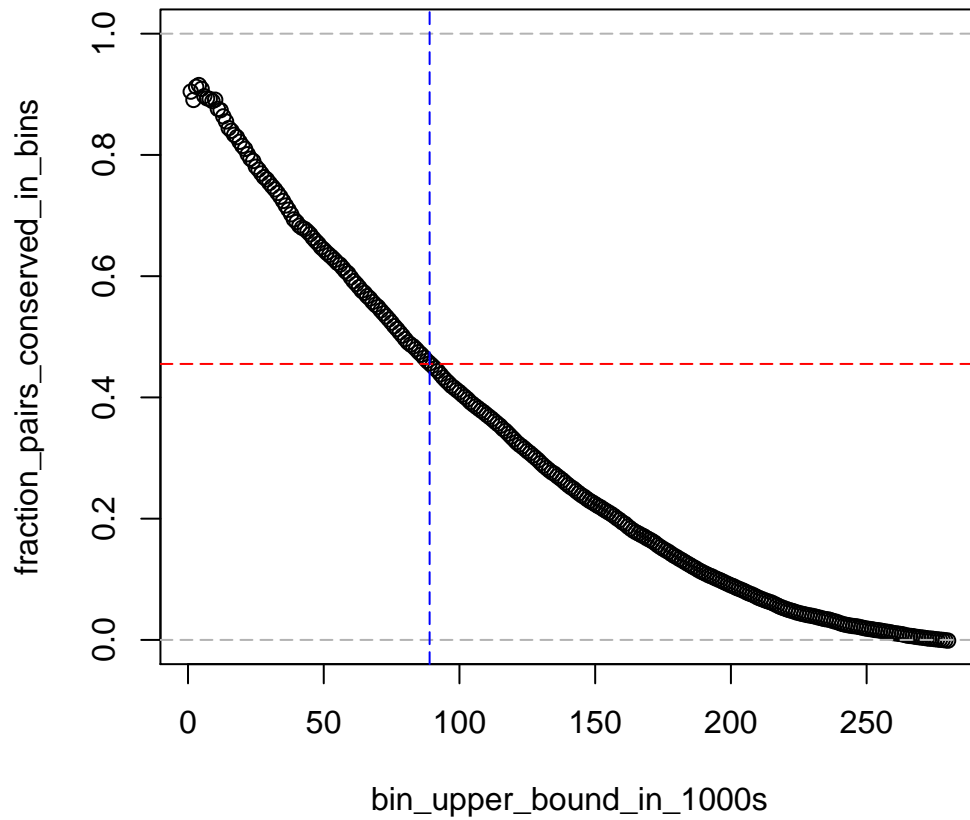

**Bin\_conservation\_minus\_bg\_Br0604L\_vs\_OR0704.3**  
**PD-0.061632**

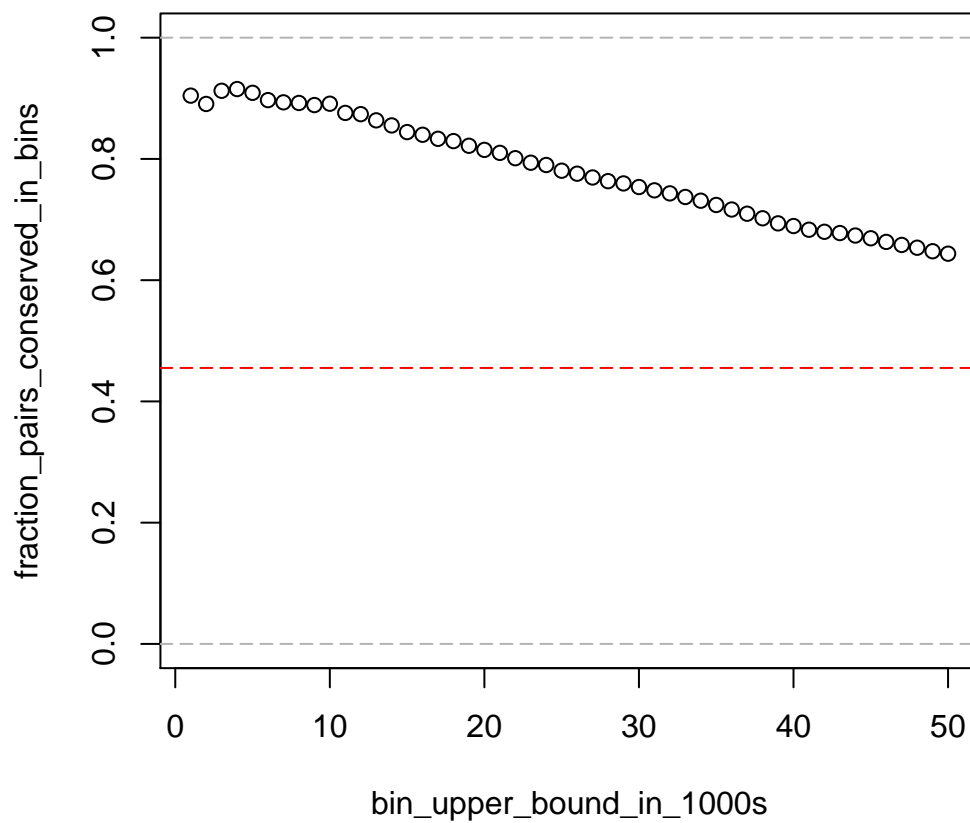

Supplement: s1 [file s1]

**Bin\_conservation\_minus\_bg\_Br0604L\_vs\_CVM-1**  
**PD-0.448652**

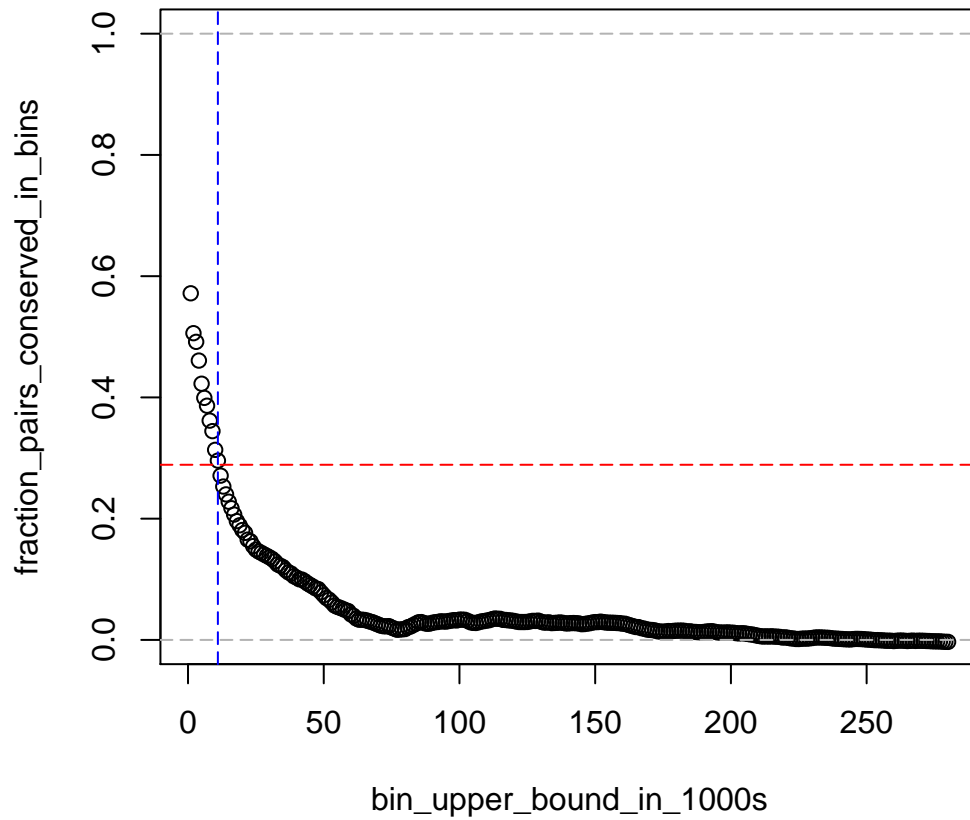

**Bin\_conservation\_minus\_bg\_Br0604L\_vs\_CVM-1**  
**PD-0.448652**

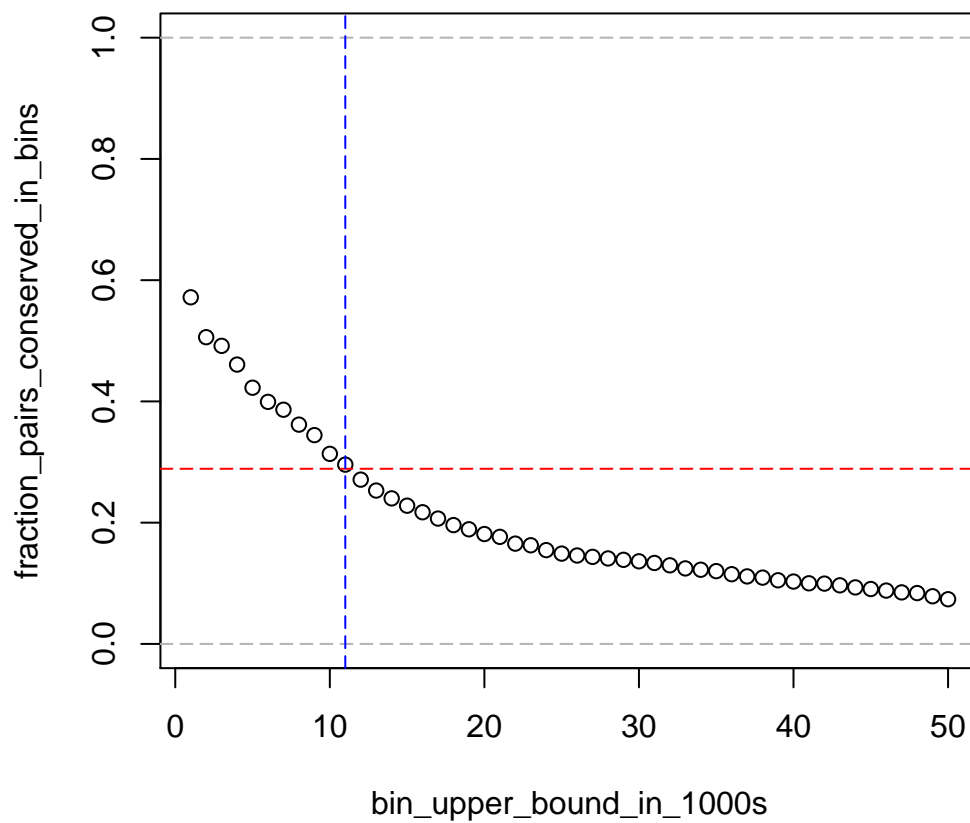

Supplement: s1 [file s1]

**Bin\_conservation\_minus\_bg\_Fr5L\_vs\_IL-3A**  
**PD-0.63831**

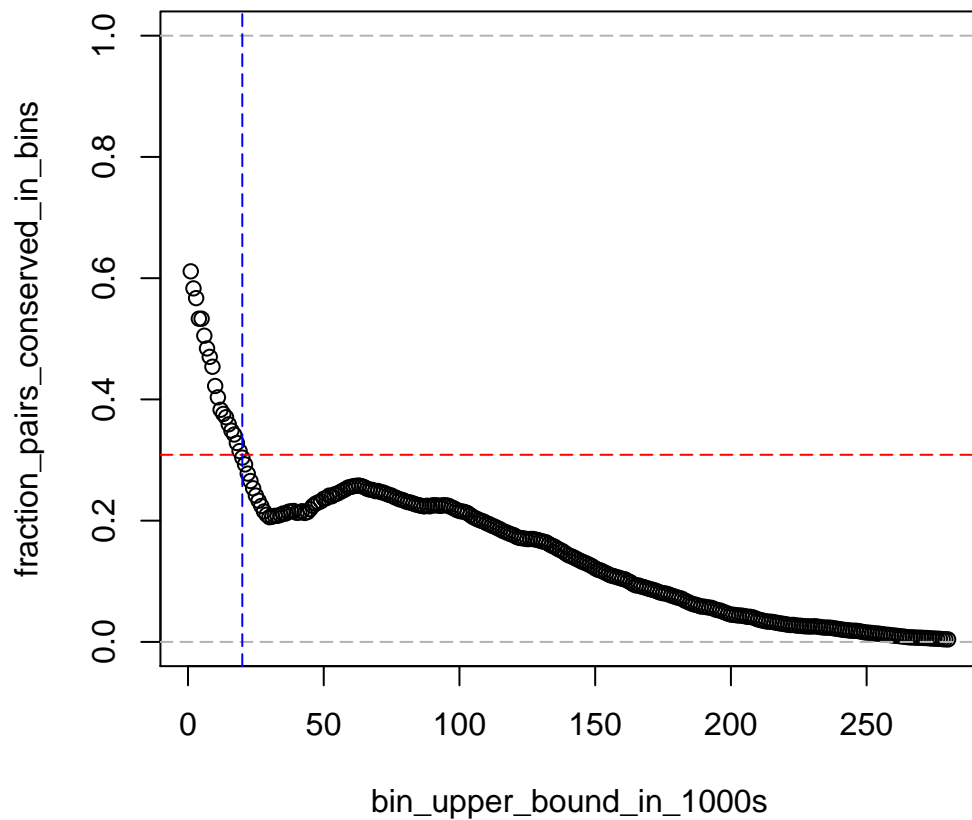

**Bin\_conservation\_minus\_bg\_Fr5L\_vs\_IL-3A**  
**PD-0.63831**

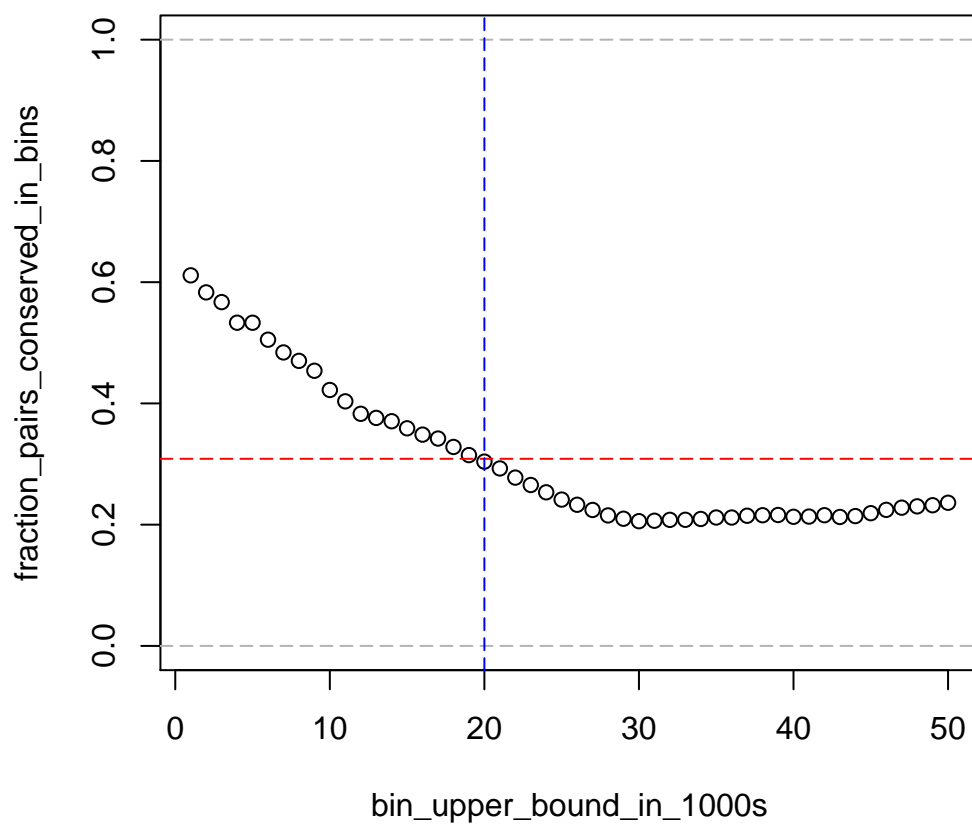

Supplement: s1 [file s1]

**Bin\_conservation\_minus\_bg\_NTS-1\_vs\_NY-2B**  
**PD-0.700324**

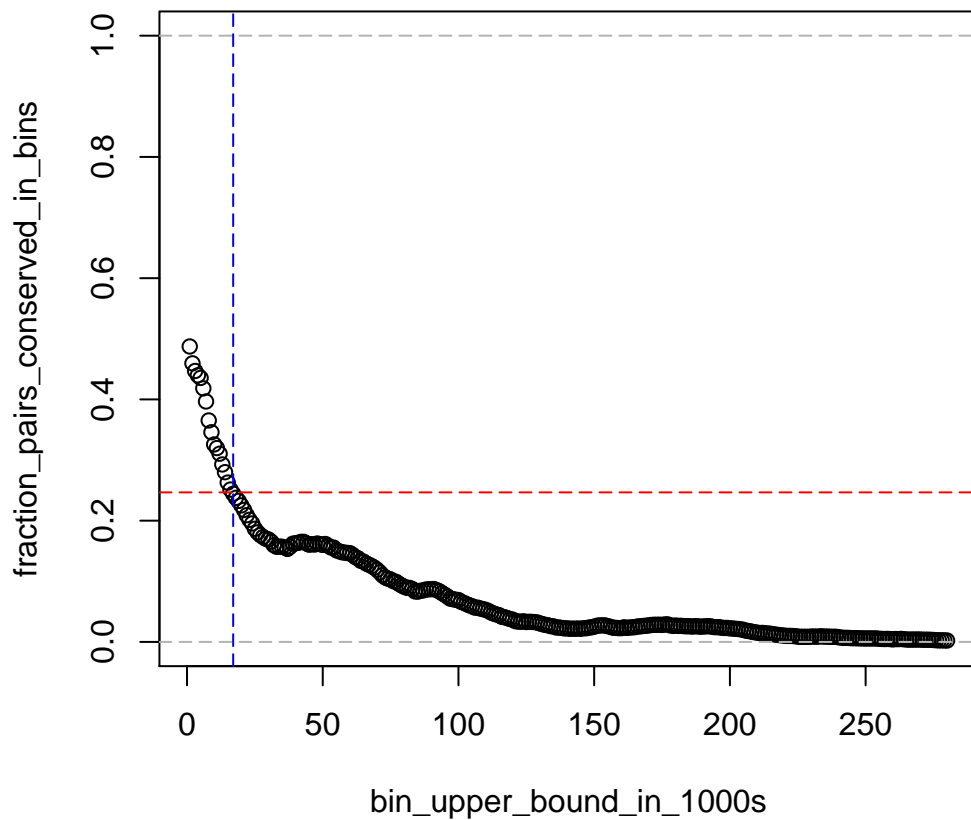

**Bin\_conservation\_minus\_bg\_NTS-1\_vs\_NY-2B**  
**PD-0.700324**

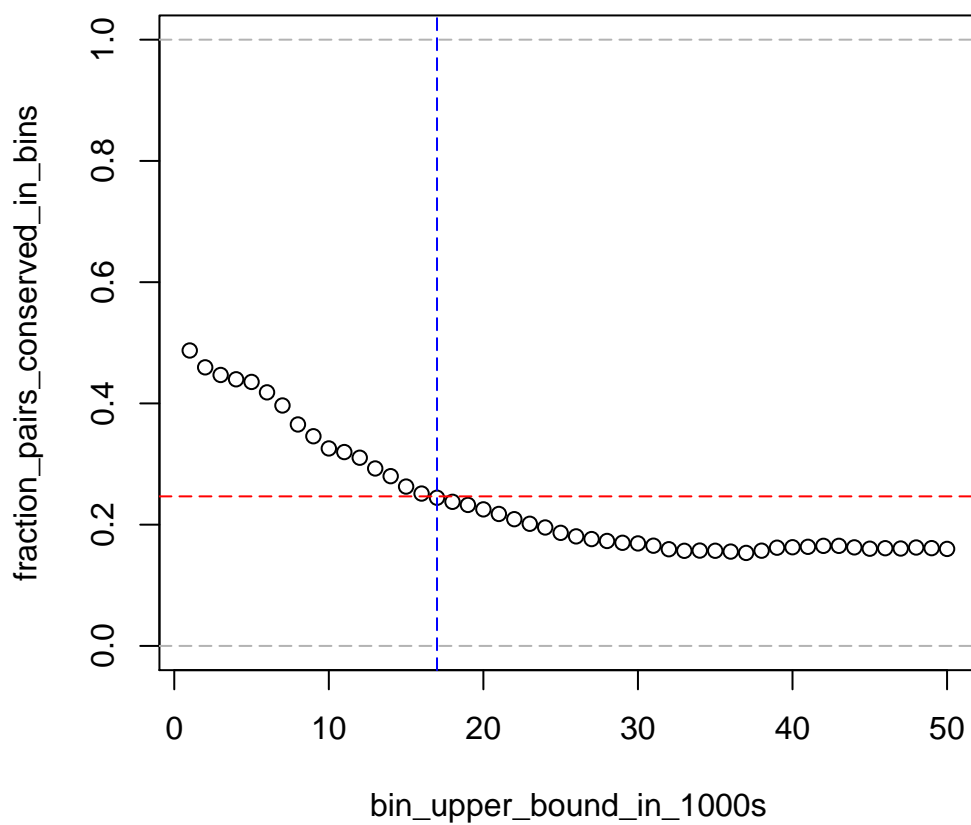

Supplement: s1 [file s1]

**Bin\_conservation\_minus\_bg\_AN69C\_vs\_NE-JV-2**  
**PD-0.67815**

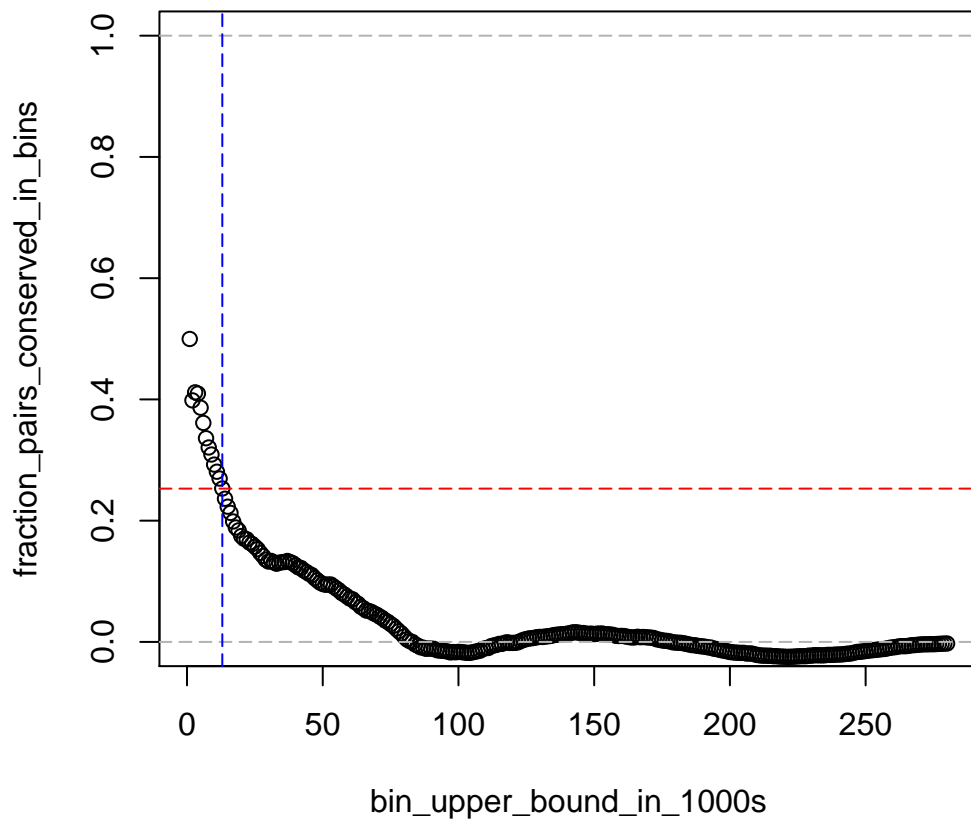

**Bin\_conservation\_minus\_bg\_AN69C\_vs\_NE-JV-2**  
**PD-0.67815**

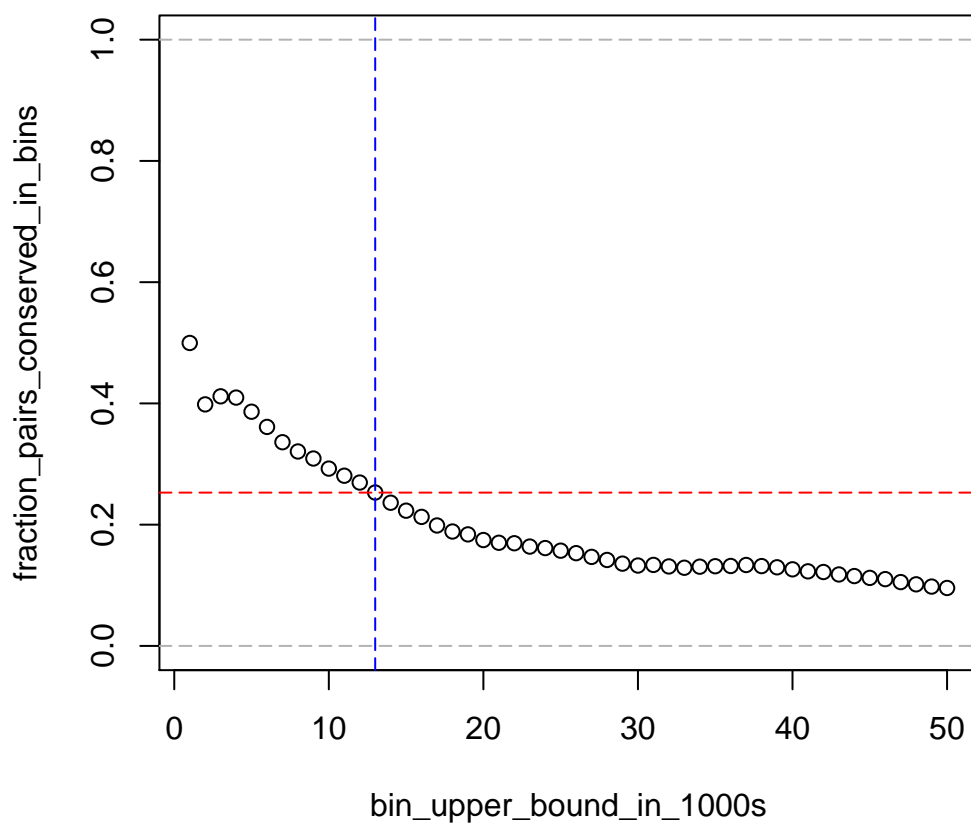

Supplement: s1 [file s1]

**Bin\_conservation\_minus\_bg\_NE-JV-2\_vs\_TN603.4.2**  
**PD-0.061705**

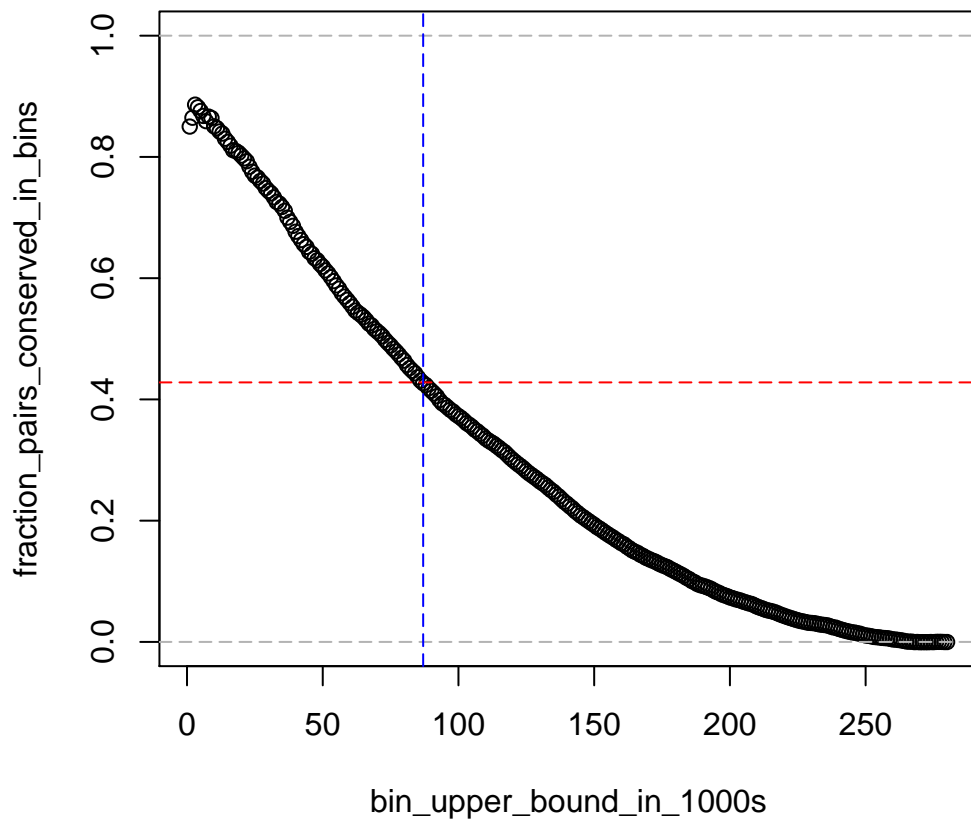

**Bin\_conservation\_minus\_bg\_NE-JV-2\_vs\_TN603.4.2**  
**PD-0.061705**

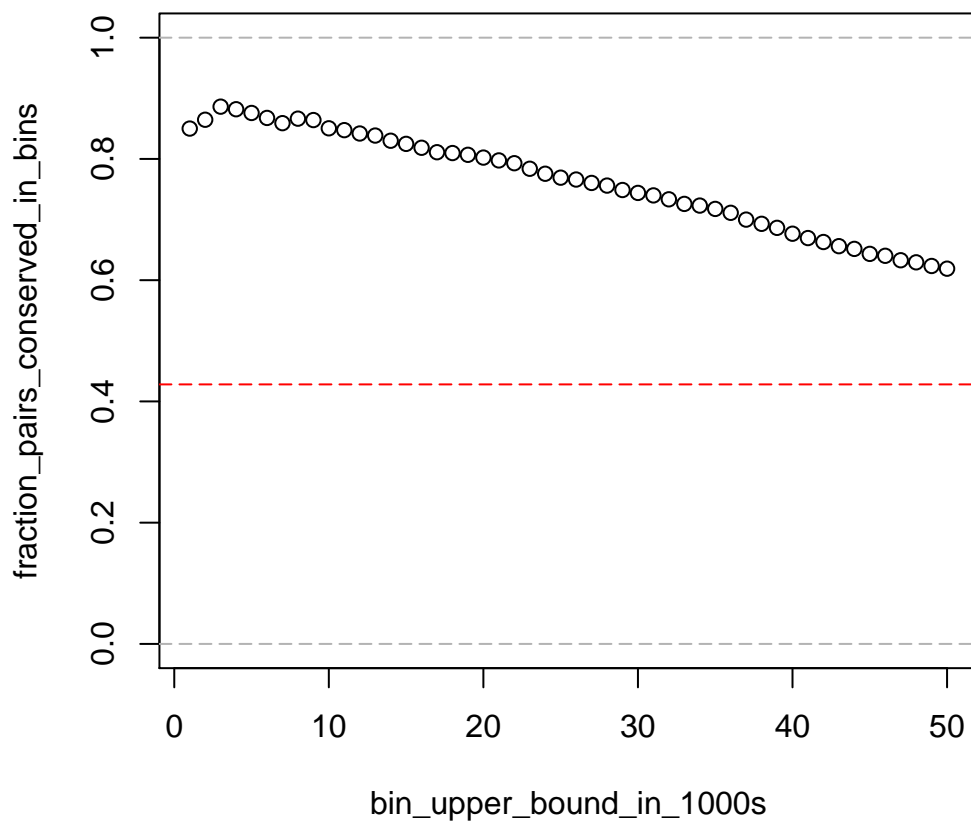

Supplement: s1 [file s1]

**Bin\_conservation\_minus\_bg\_CZ-2\_vs\_NE-JV-2**  
**PD-0.464966**

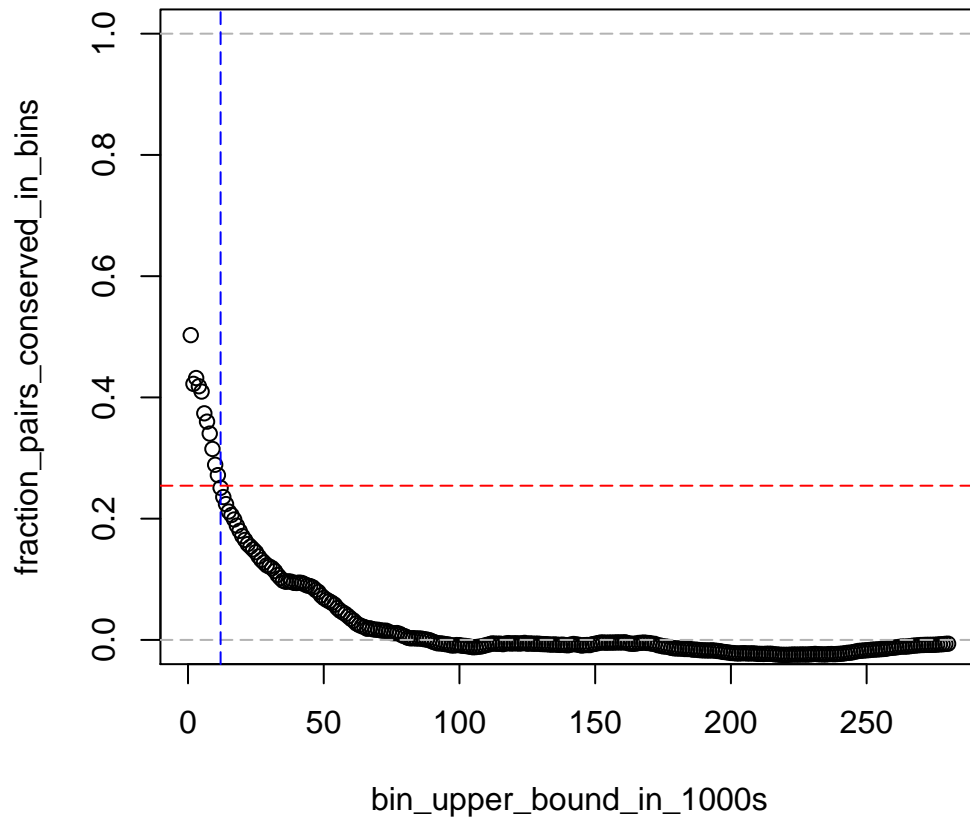

**Bin\_conservation\_minus\_bg\_CZ-2\_vs\_NE-JV-2**  
**PD-0.464966**

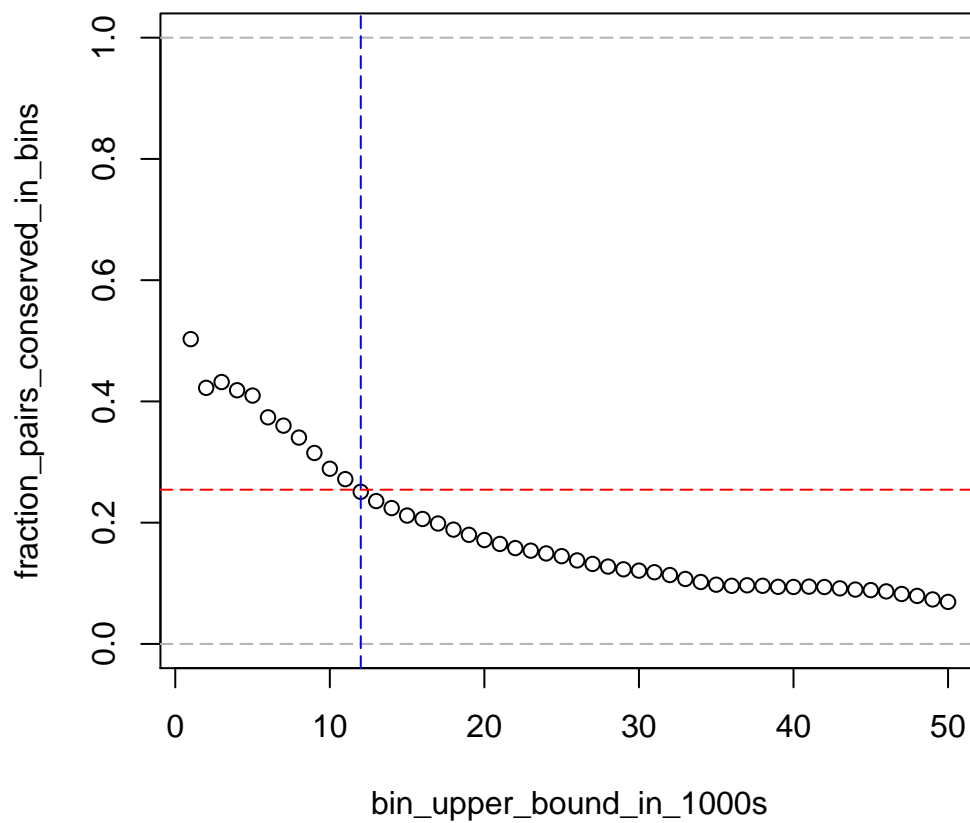

Supplement: s1 [file s1]

**Bin\_conservation\_minus\_bg\_MO0605SPH\_vs\_WI0606**  
**PD-0.00319**

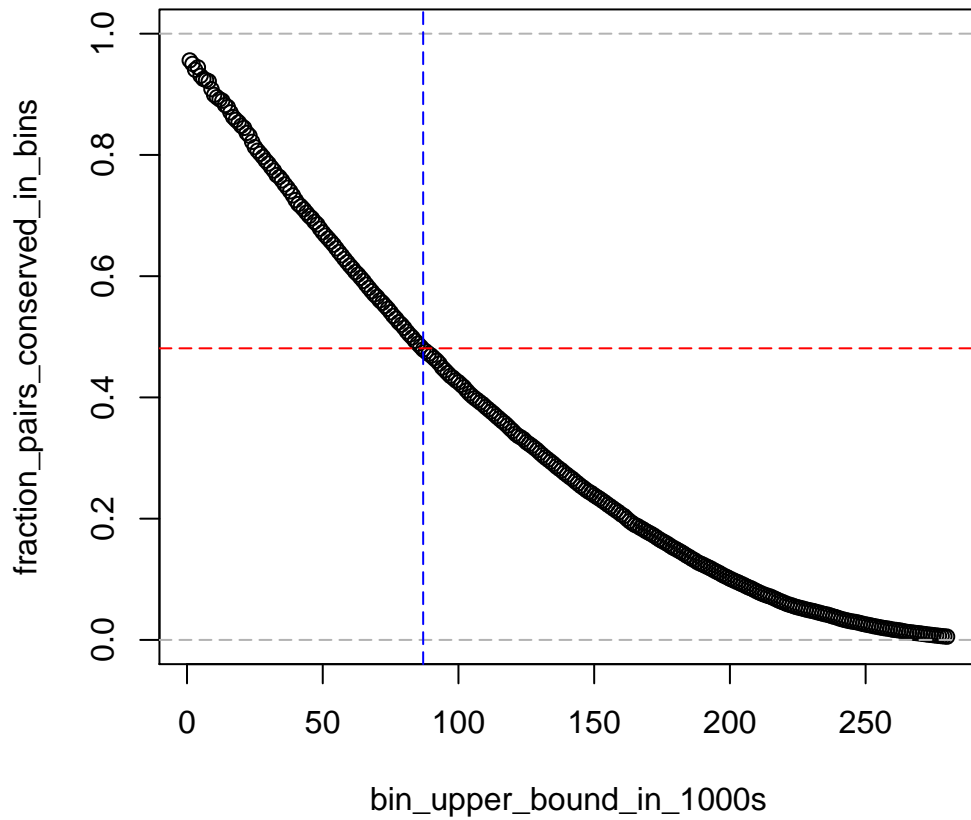

**Bin\_conservation\_minus\_bg\_MO0605SPH\_vs\_WI0606**  
**PD-0.00319**

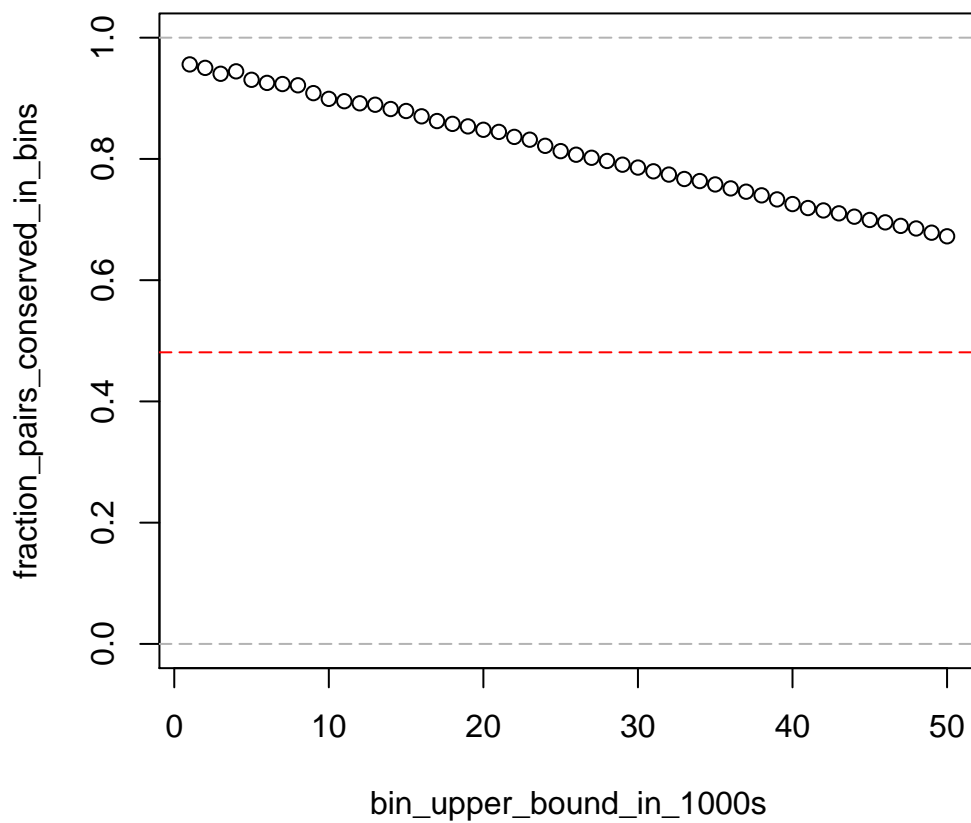

Supplement: s1 [file s1]

**Bin\_conservation\_minus\_bg\_AP110A\_vs\_KS1B**  
**PD-0.65385**

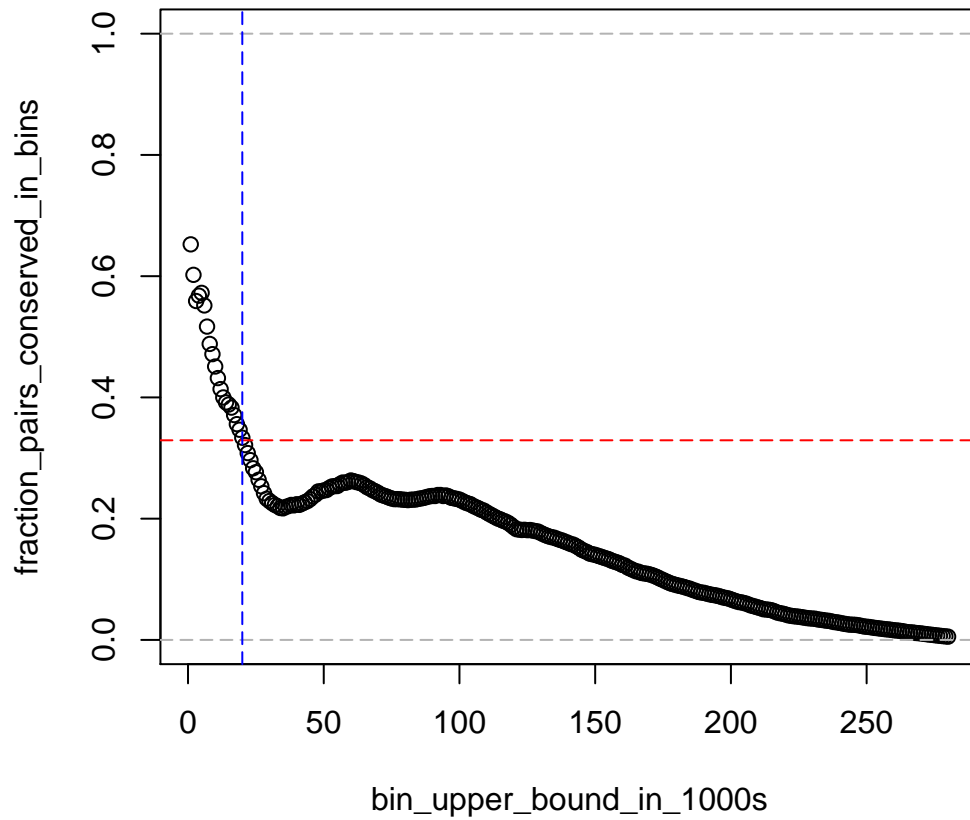

**Bin\_conservation\_minus\_bg\_AP110A\_vs\_KS1B**  
**PD-0.65385**

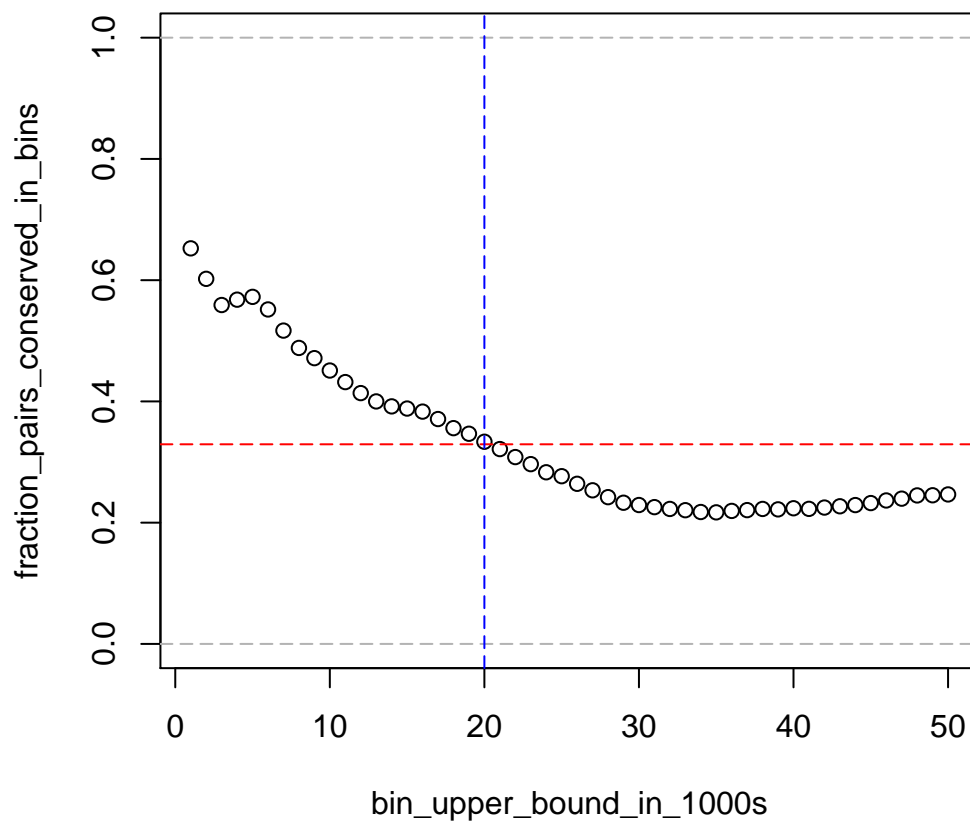

Supplement: s1 [file s1]

**Bin\_conservation\_minus\_bg\_MA-1E\_vs\_NE-JV-2**  
**PD-0.694619**

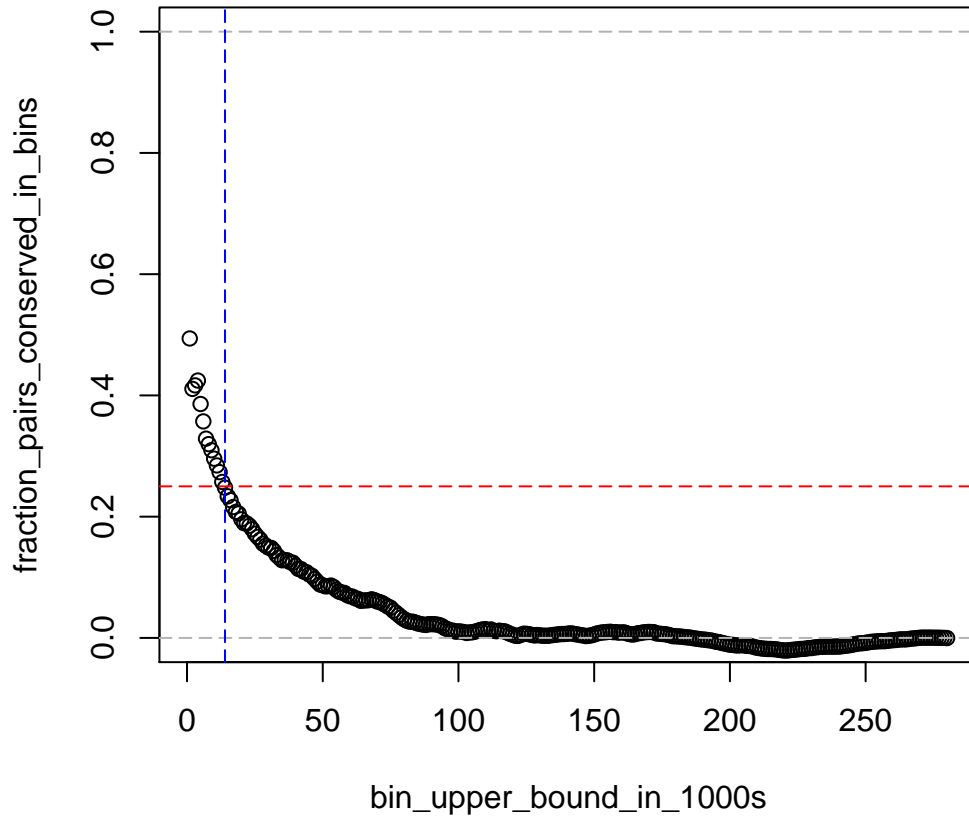

**Bin\_conservation\_minus\_bg\_MA-1E\_vs\_NE-JV-2**  
**PD-0.694619**

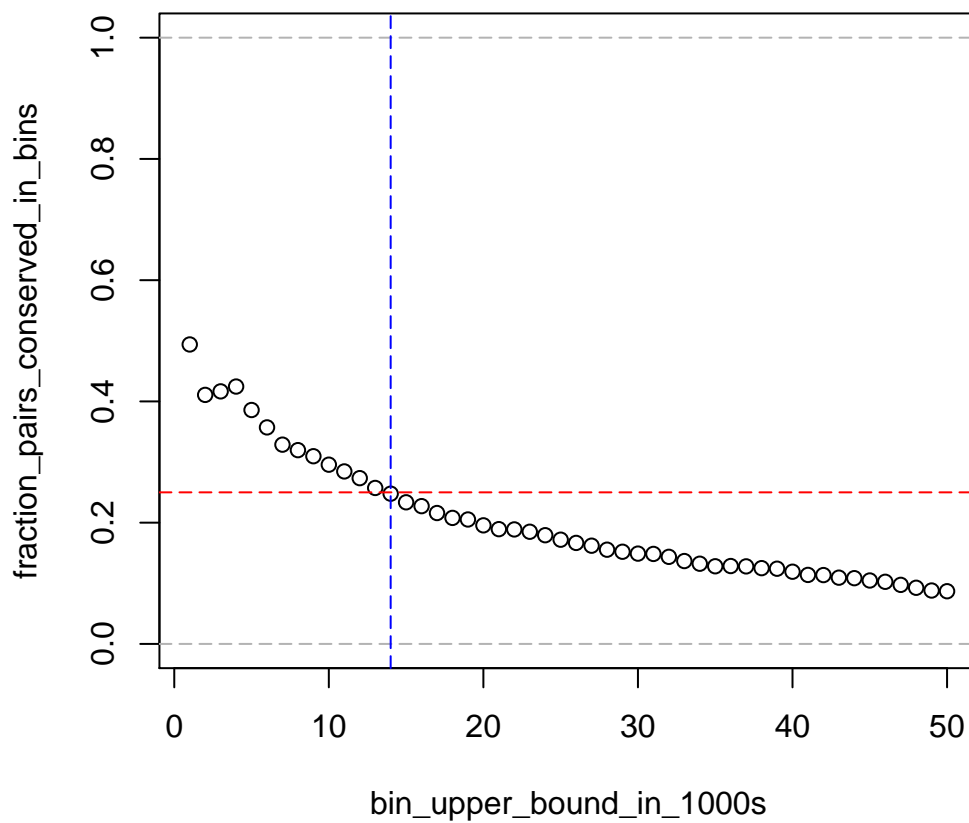

Supplement: s1 [file s1]

**Bin\_conservation\_minus\_bg\_MO0605SPH\_vs\_NTS-1**  
**PD-0.051646**

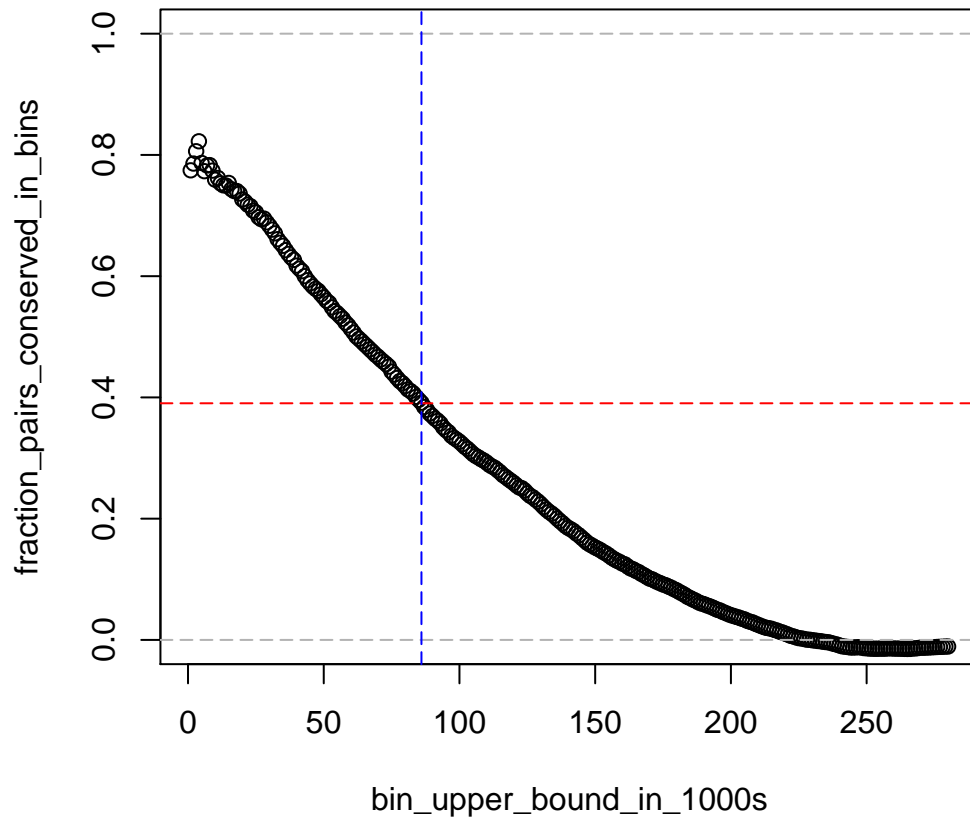

**Bin\_conservation\_minus\_bg\_MO0605SPH\_vs\_NTS-1**  
**PD-0.051646**

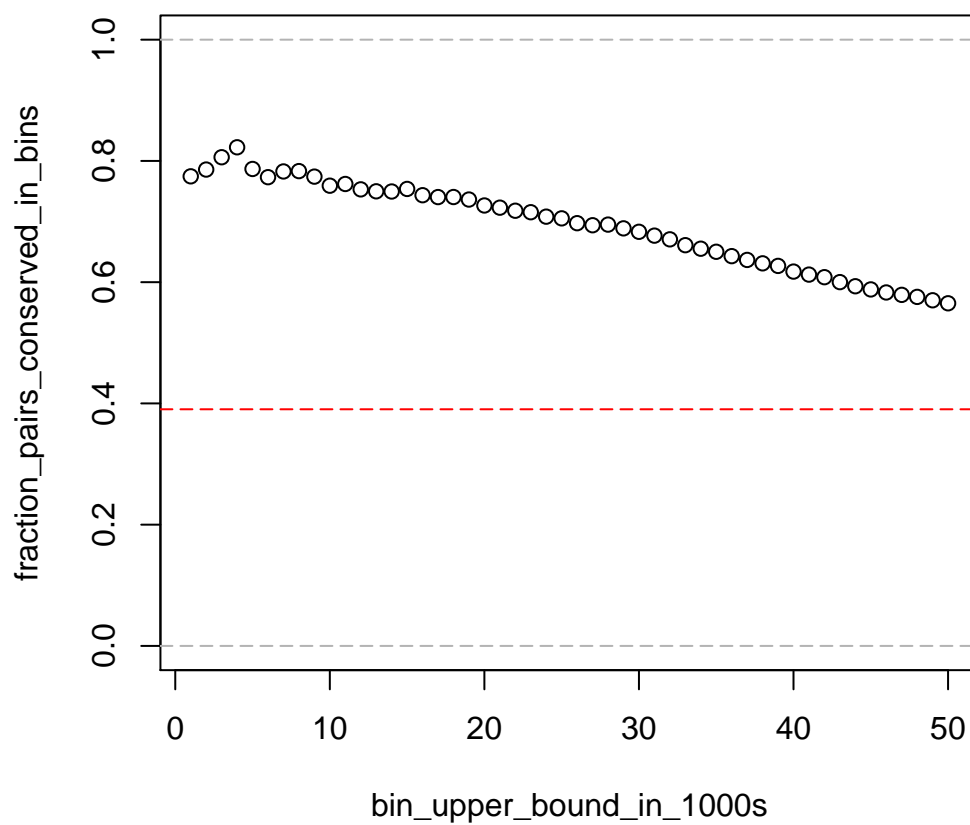

Supplement: s1 [file s1]

**Bin\_conservation\_minus\_bg\_AP110A\_vs\_MA-1D**  
**PD-0.661305**

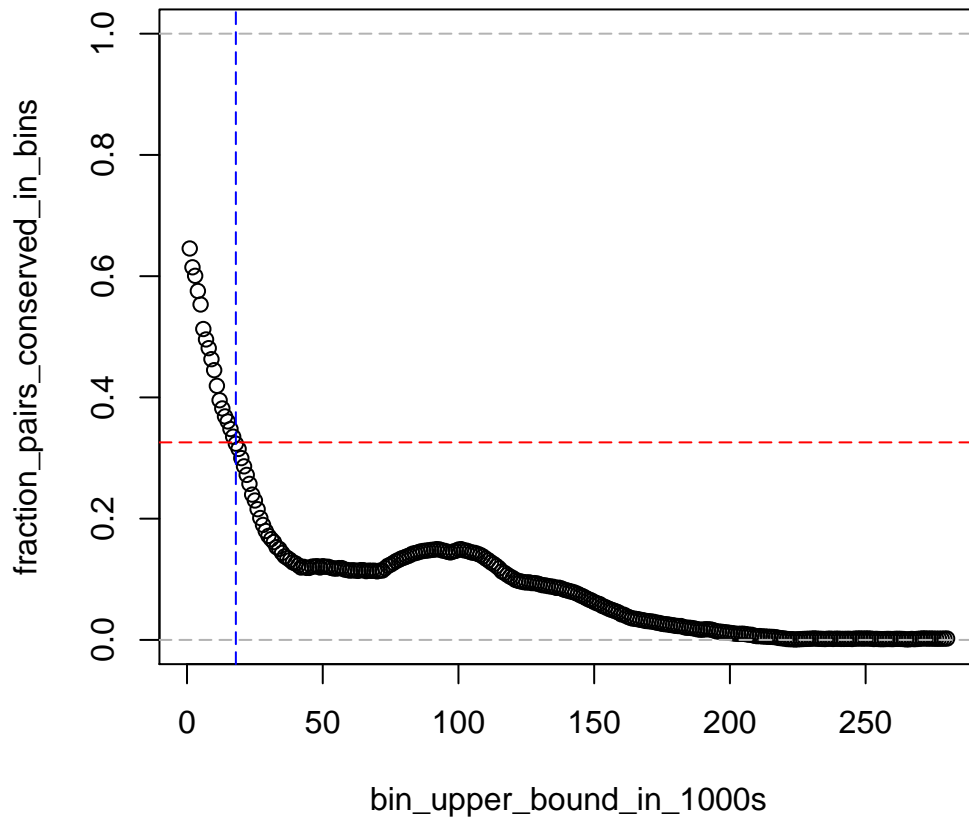

**Bin\_conservation\_minus\_bg\_AP110A\_vs\_MA-1D**  
**PD-0.661305**

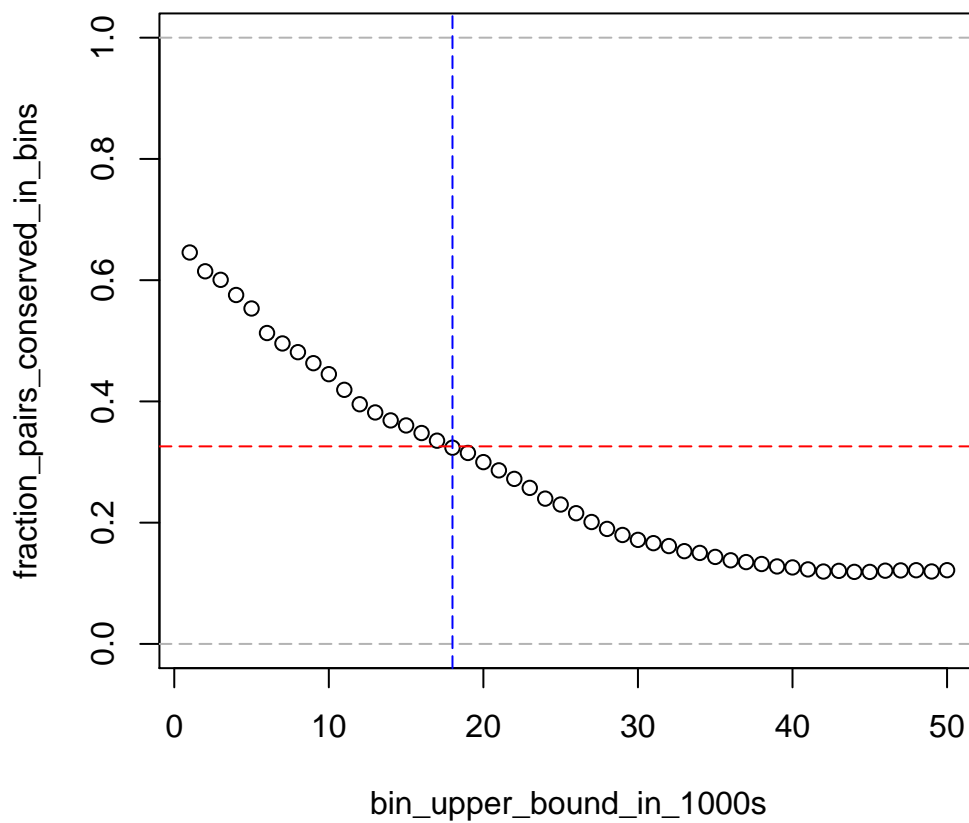

Supplement: s1 [file s1]

**Bin\_conservation\_minus\_bg\_IL-5-2s1\_vs\_TN603.4.2**  
**PD-0.693024**

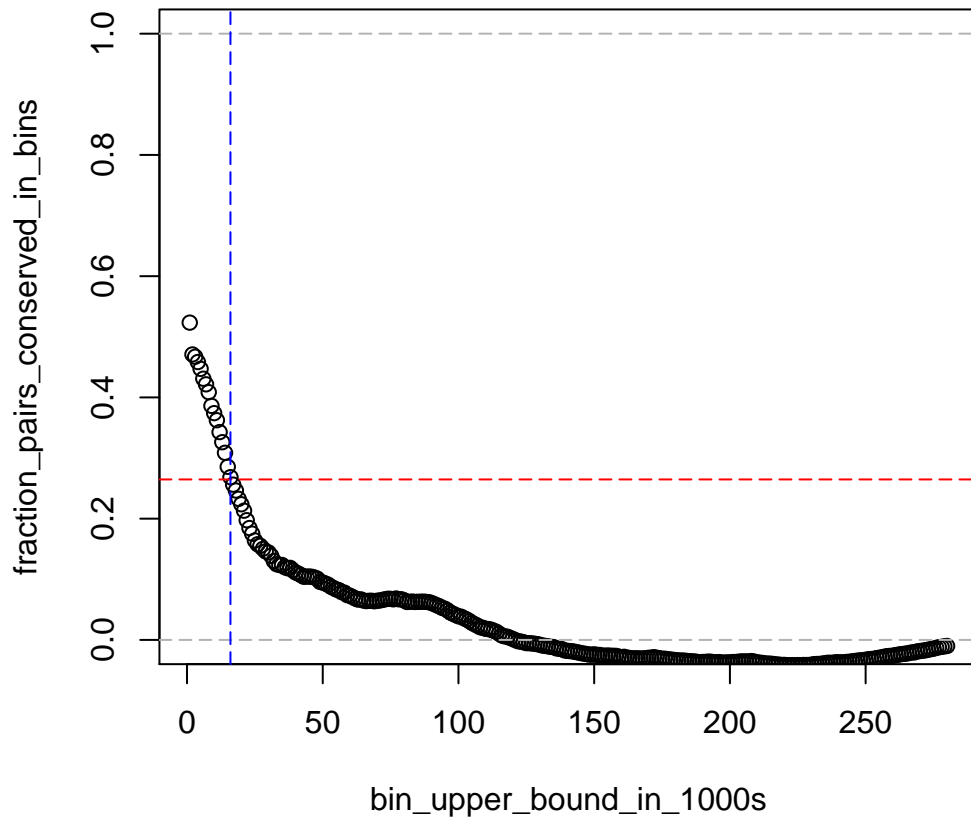

**Bin\_conservation\_minus\_bg\_IL-5-2s1\_vs\_TN603.4.2**  
**PD-0.693024**

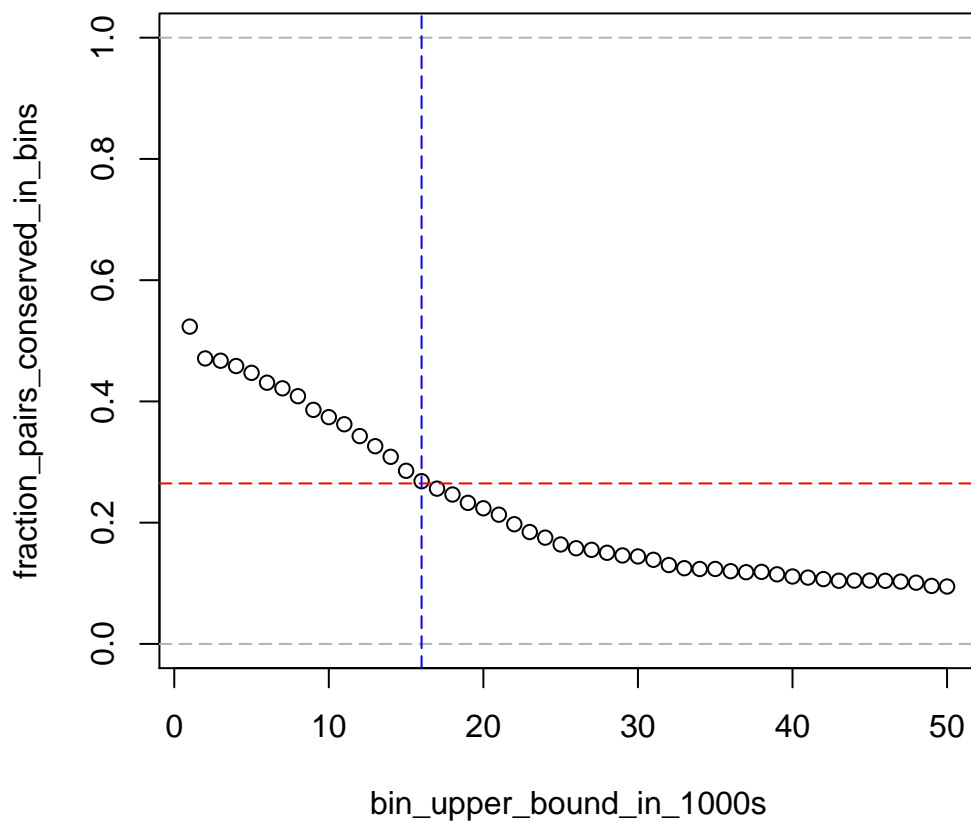

Supplement: s1 [file s1]

**Bin\_conservation\_minus\_bg\_Br0604L\_vs\_NYs-1**  
**PD-0.691923**

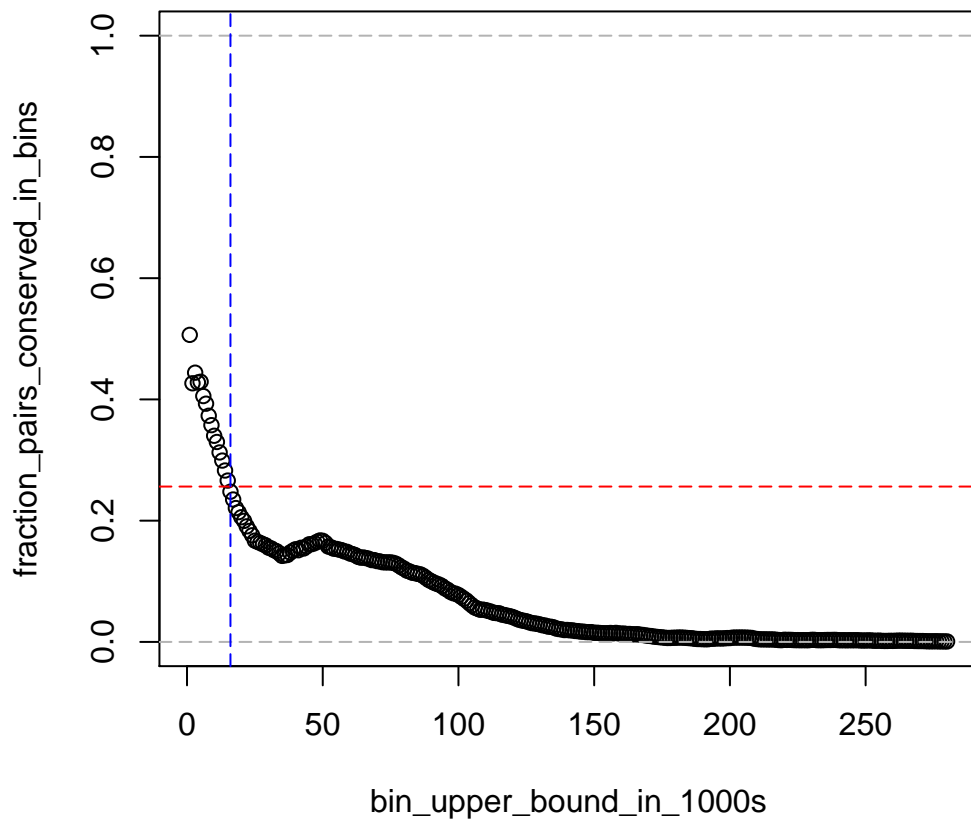

**Bin\_conservation\_minus\_bg\_Br0604L\_vs\_NYs-1**  
**PD-0.691923**

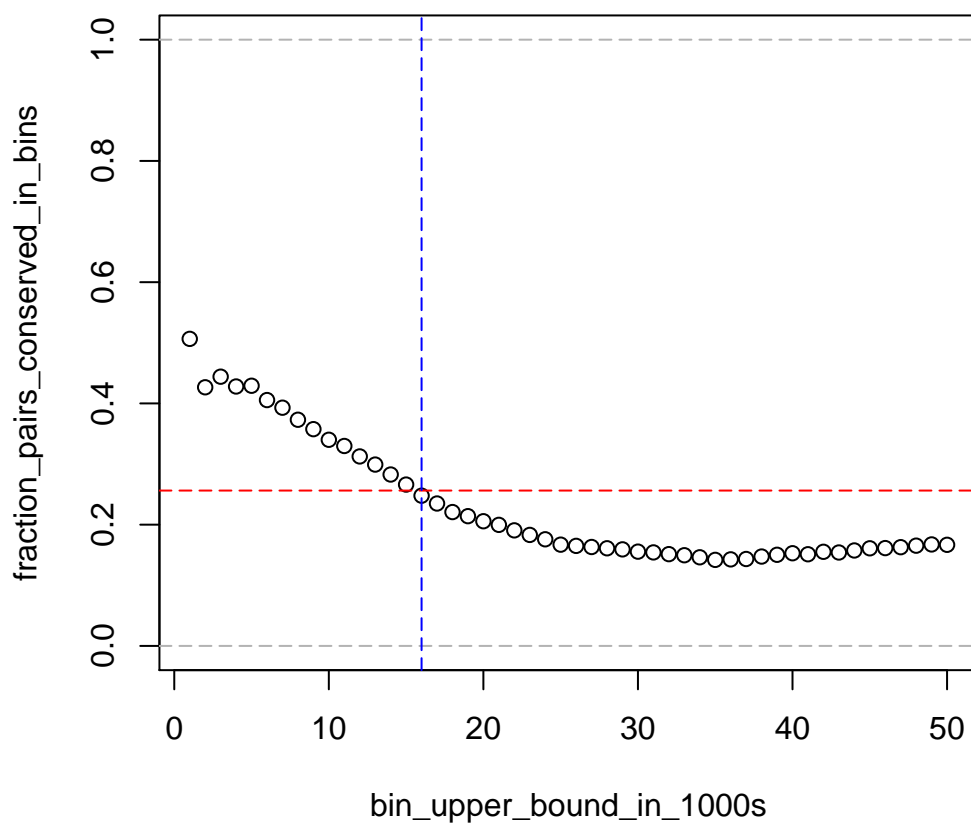

Supplement: s1 [file s1]

**Bin\_conservation\_minus\_bg\_NY-2B\_vs\_NY2A**  
**PD-0.053992**

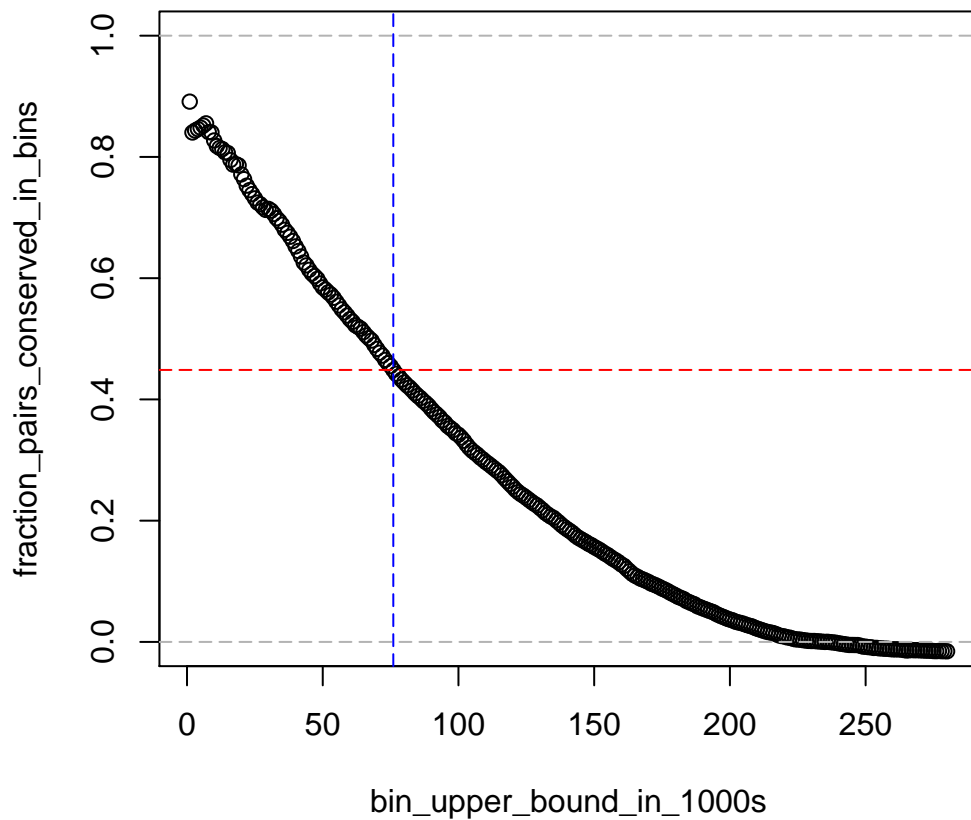

**Bin\_conservation\_minus\_bg\_NY-2B\_vs\_NY2A**  
**PD-0.053992**

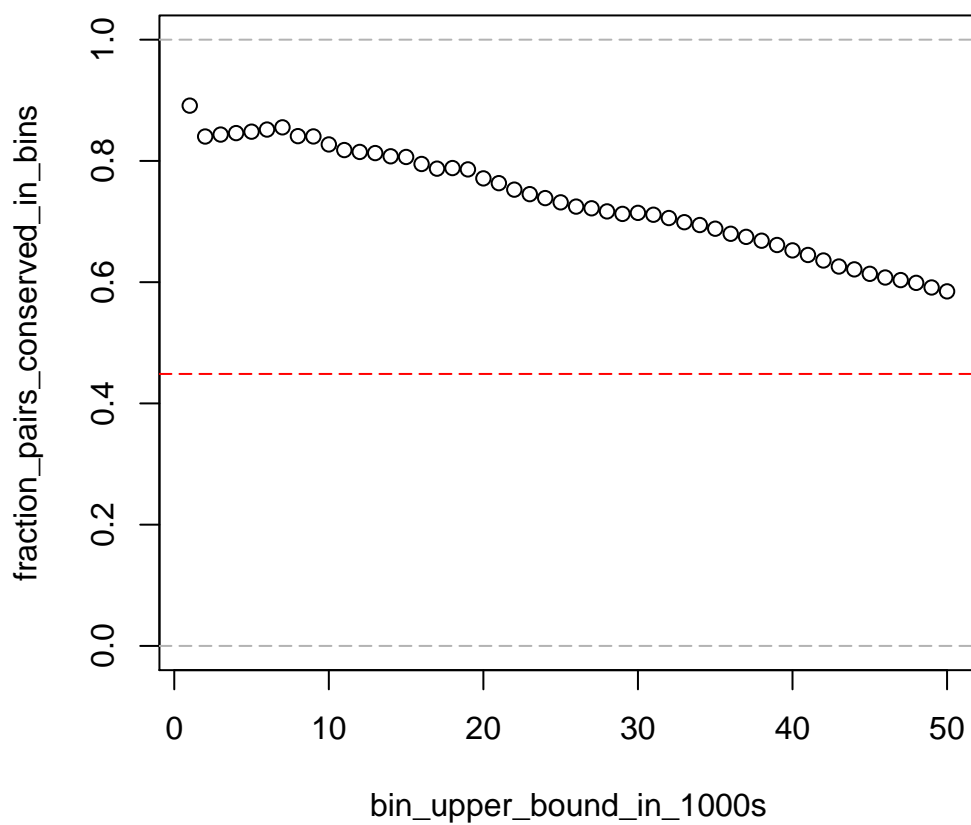

Supplement: s1 [file s1]

**Bin\_conservation\_minus\_bg\_CvsA1\_vs\_WI0606**  
**PD-0.698647**

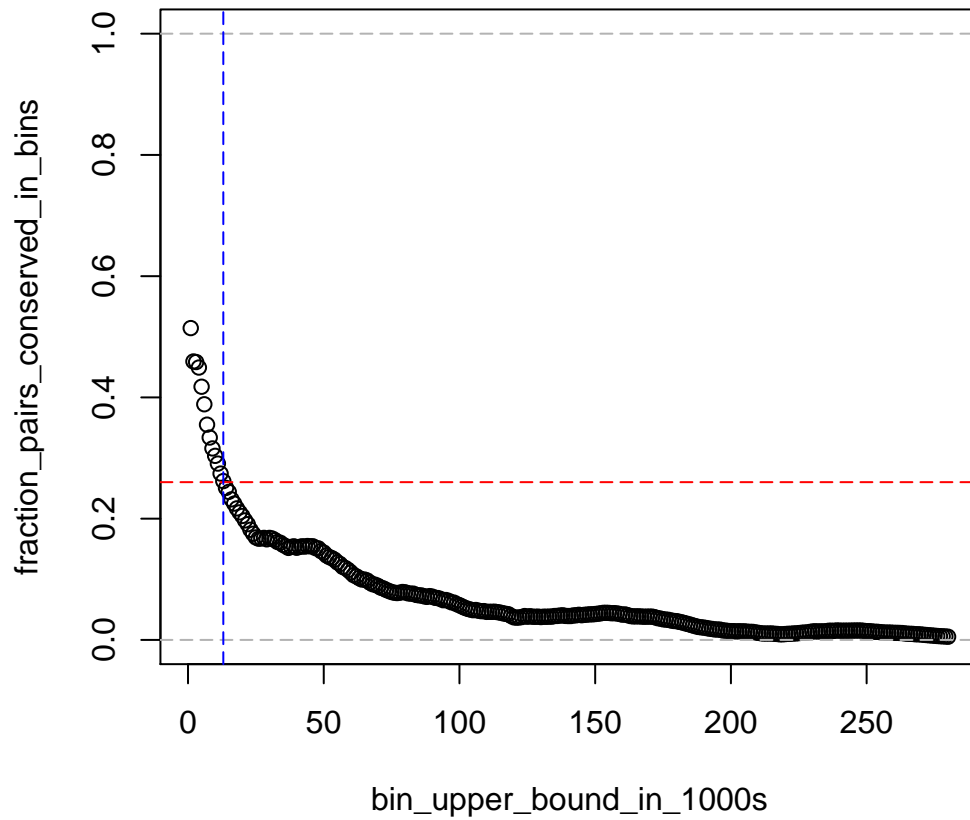

**Bin\_conservation\_minus\_bg\_CvsA1\_vs\_WI0606**  
**PD-0.698647**

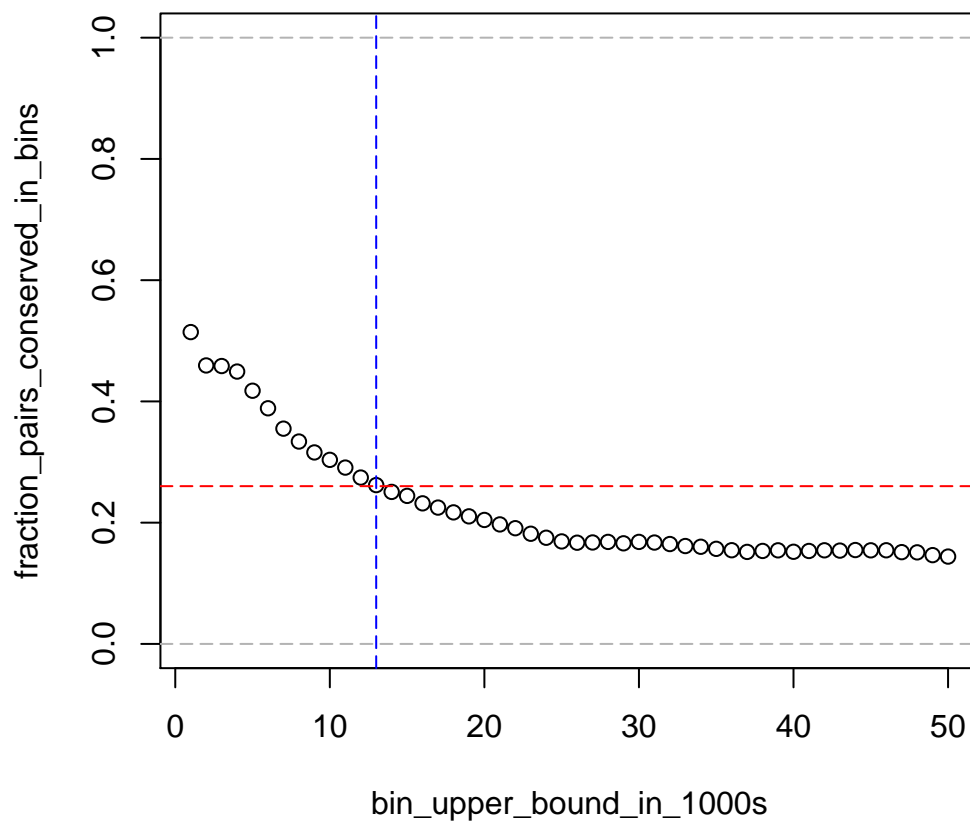

Supplement: s1 [file s1]

**Bin\_conservation\_minus\_bg\_Can18-4\_vs\_GM0701.1**  
**PD-0.459482**

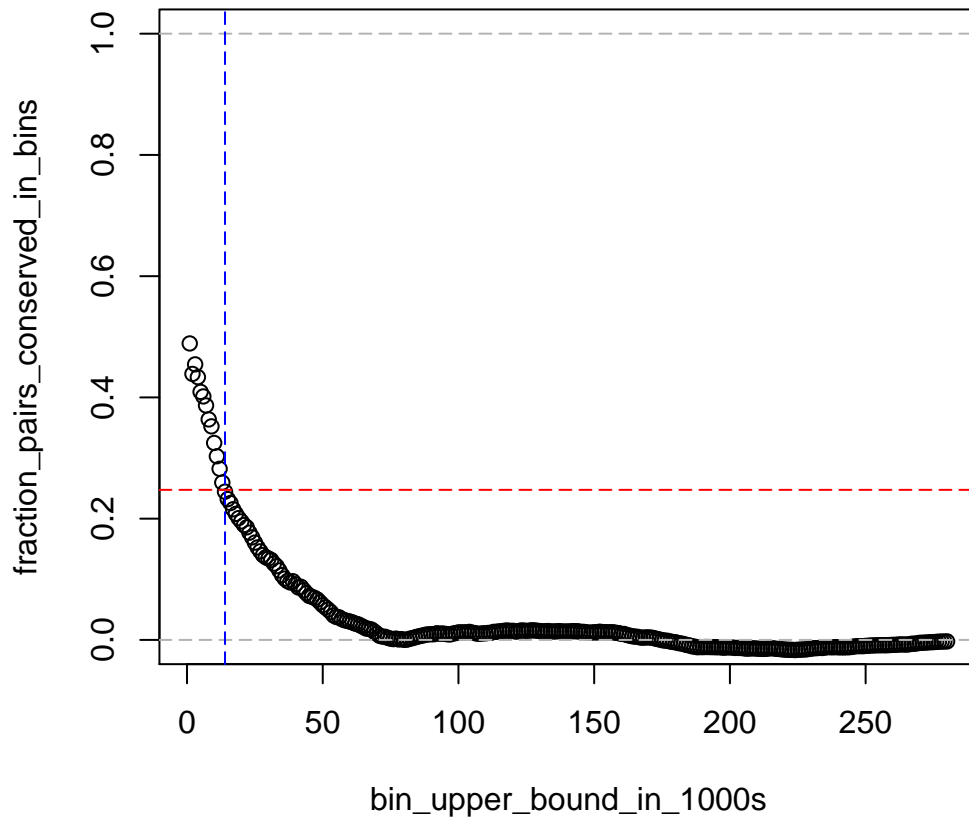

**Bin\_conservation\_minus\_bg\_Can18-4\_vs\_GM0701.1**  
**PD-0.459482**

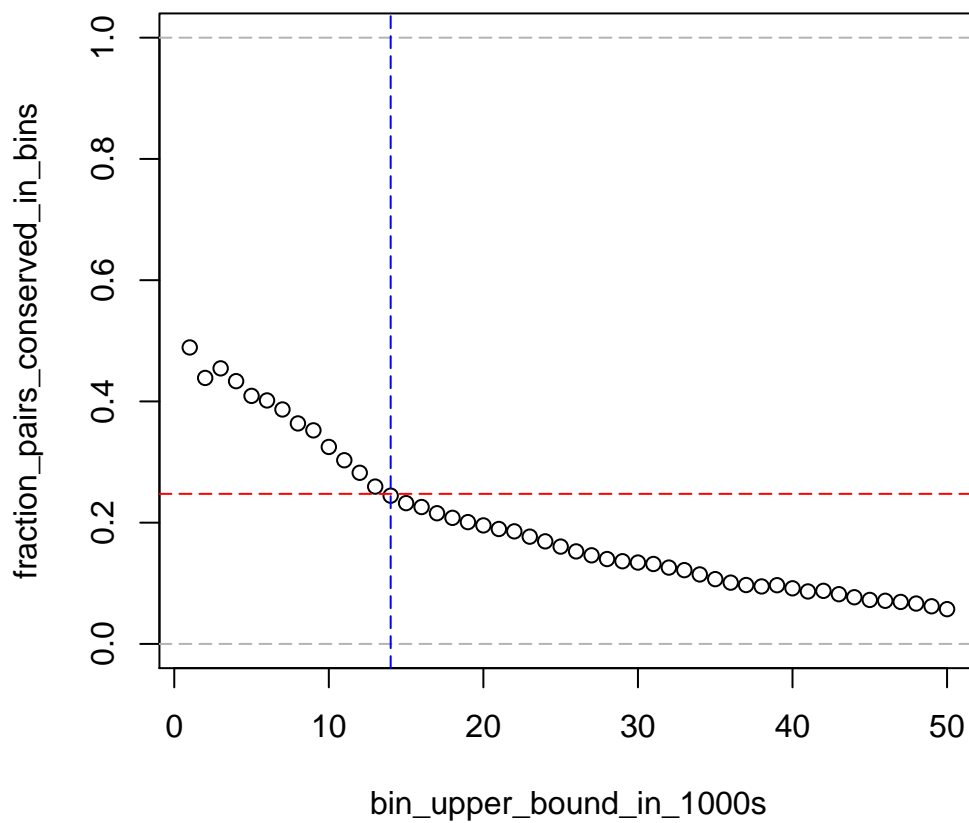

Supplement: s1 [file s1]

**Bin\_conservation\_minus\_bg\_FR483\_vs\_MO0605SPH**  
**PD-0.468598**

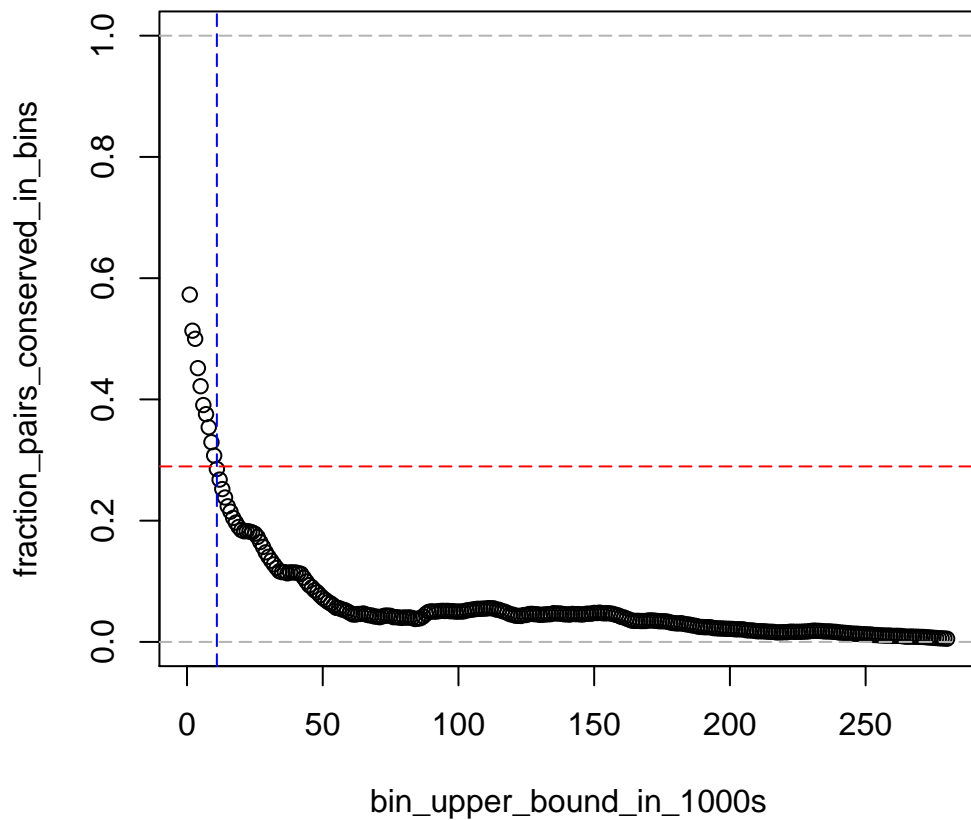

**Bin\_conservation\_minus\_bg\_FR483\_vs\_MO0605SPH**  
**PD-0.468598**

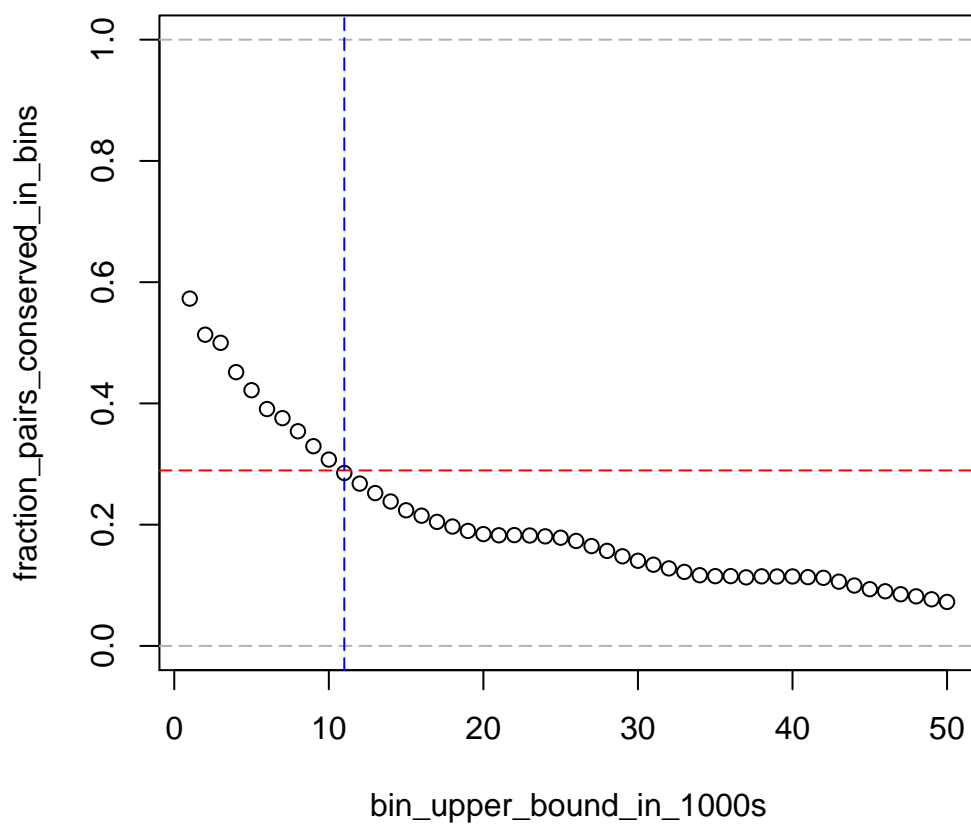

Supplement: s1 [file s1]

**Bin\_conservation\_minus\_bg\_GM0701.1\_vs\_MN0810.1**  
**PD-0.100691**

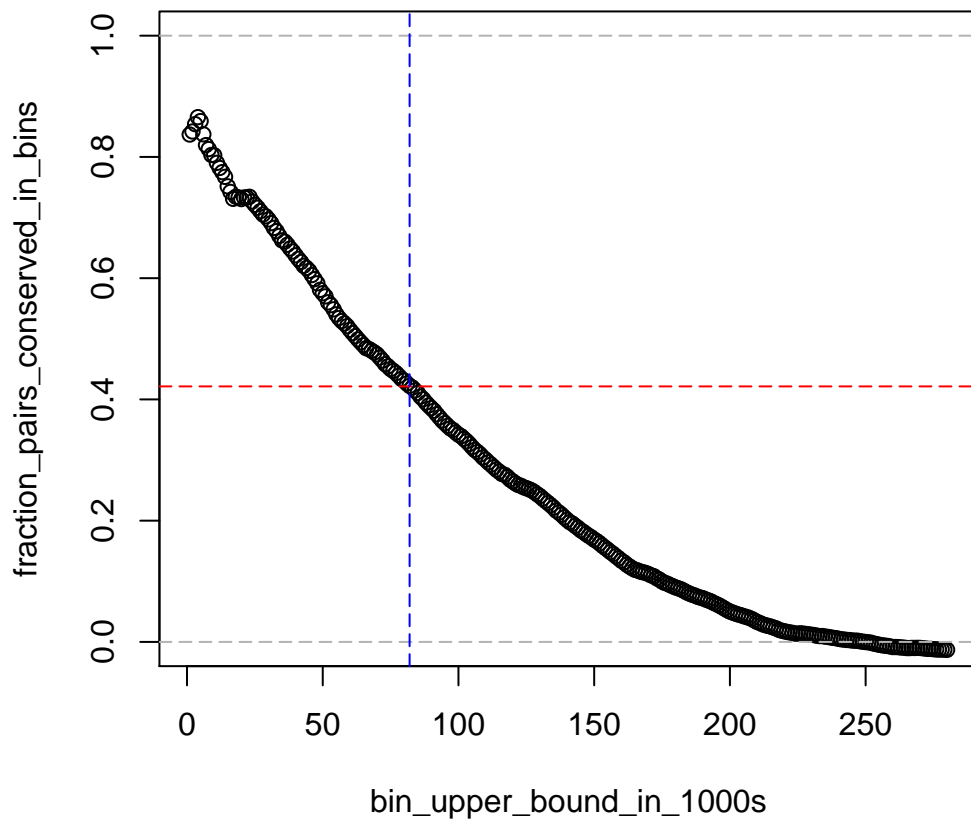

**Bin\_conservation\_minus\_bg\_GM0701.1\_vs\_MN0810.1**  
**PD-0.100691**

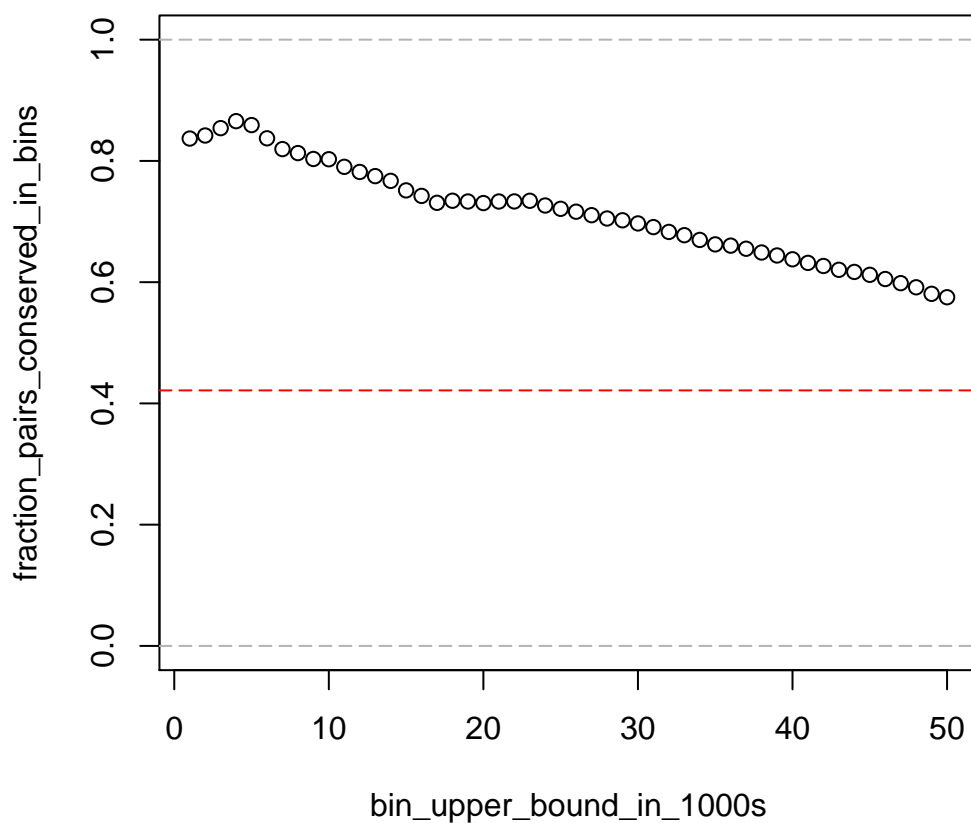

Supplement: s1 [file s1]

**Bin\_conservation\_minus\_bg\_CVM-1\_vs\_MN0810.1**  
**PD-0.45712**

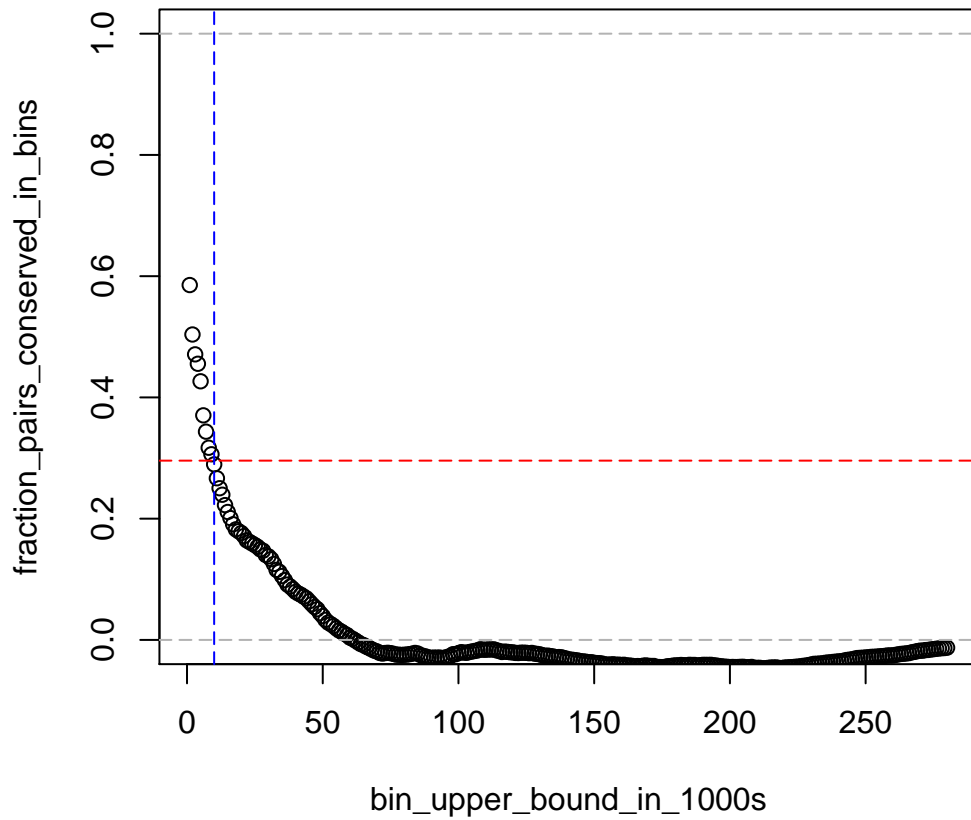

**Bin\_conservation\_minus\_bg\_CVM-1\_vs\_MN0810.1**  
**PD-0.45712**

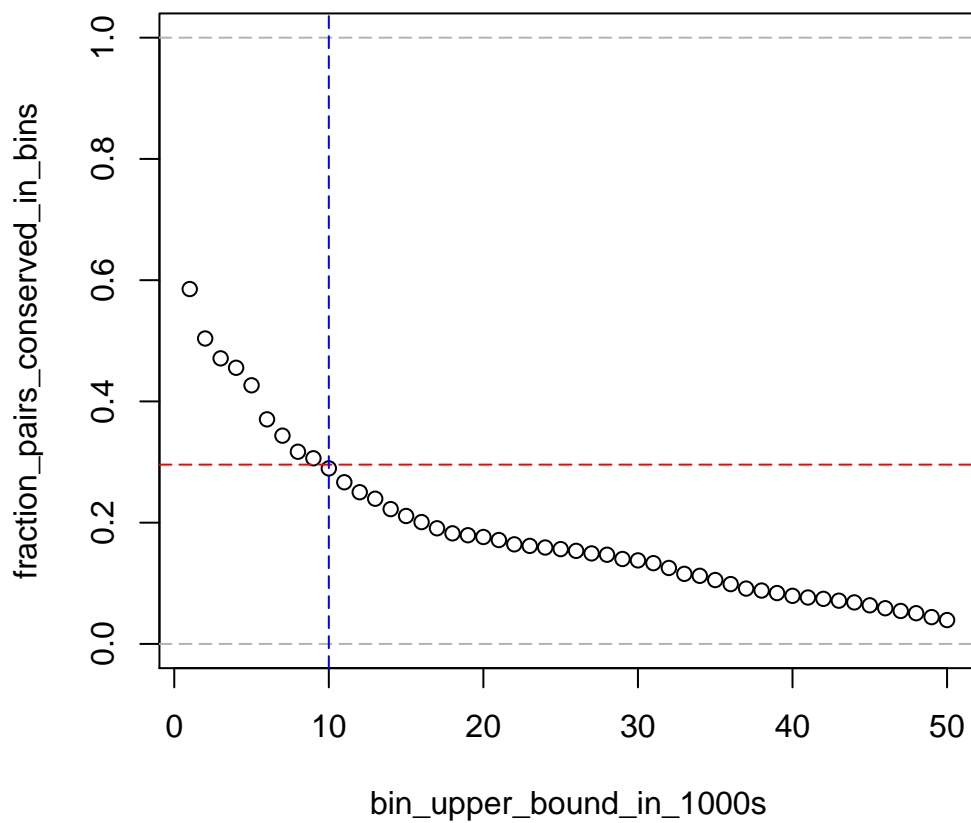

Supplement: s1 [file s1]

**Bin\_conservation\_minus\_bg\_FR483\_vs\_NE-JV-4**  
**PD-0.644651**

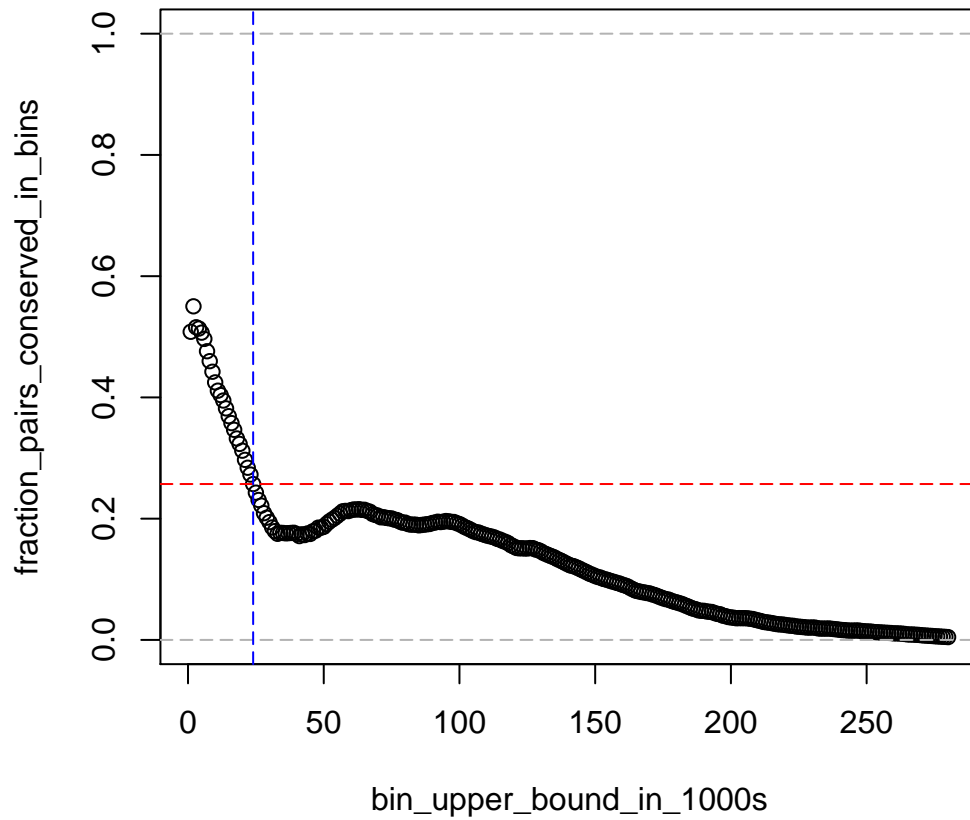

**Bin\_conservation\_minus\_bg\_FR483\_vs\_NE-JV-4**  
**PD-0.644651**

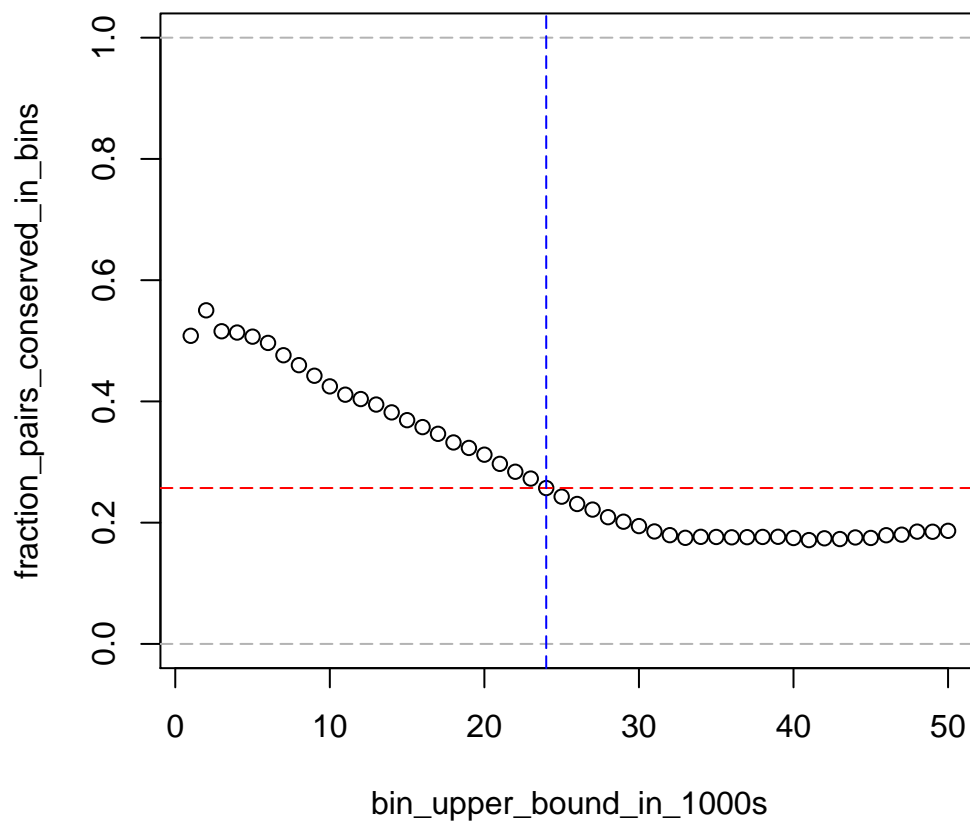

Supplement: s1 [file s1]

**Bin\_conservation\_minus\_bg\_NE-JV-1\_vs\_NTS-1**  
**PD-0.488851**

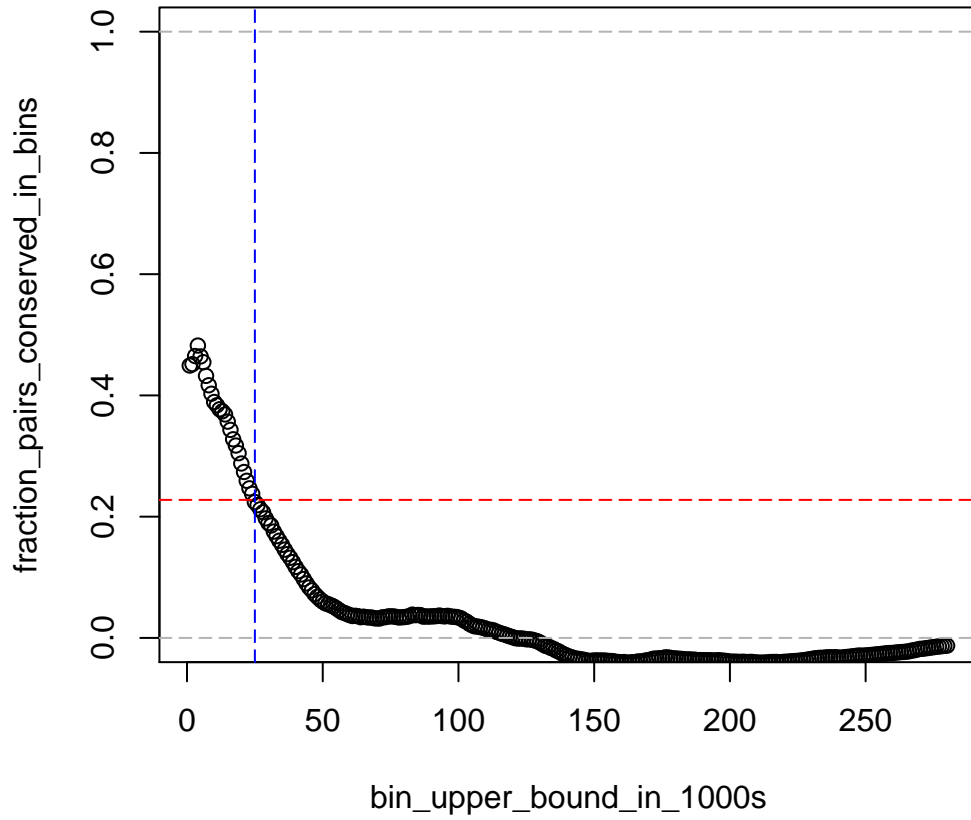

**Bin\_conservation\_minus\_bg\_NE-JV-1\_vs\_NTS-1**  
**PD-0.488851**

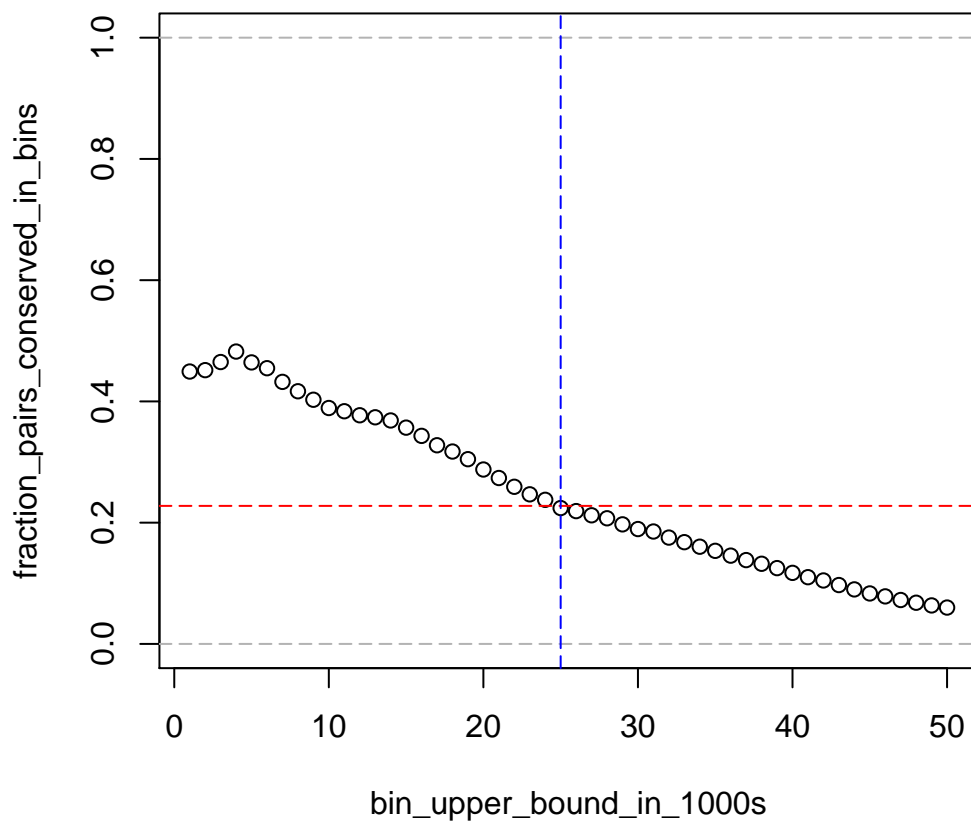

Supplement: s1 [file s1]

**Bin\_conservation\_minus\_bg\_MO0605SPH\_vs\_NE-JV-3**  
**PD-0.008737**

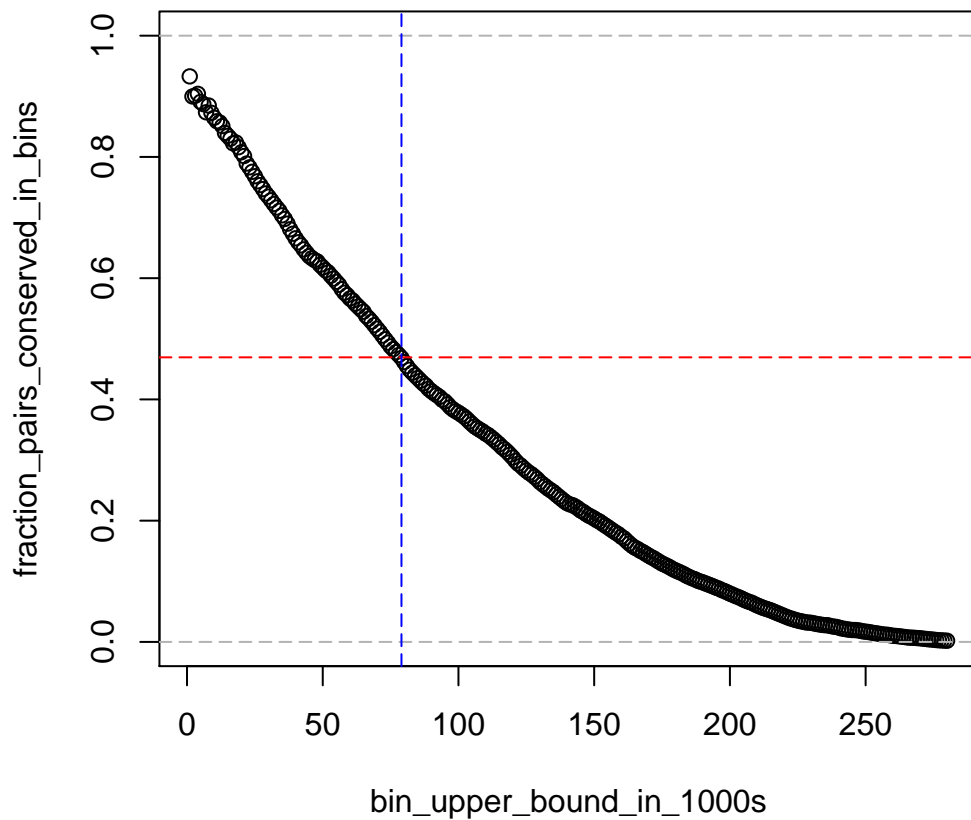

**Bin\_conservation\_minus\_bg\_MO0605SPH\_vs\_NE-JV-3**  
**PD-0.008737**

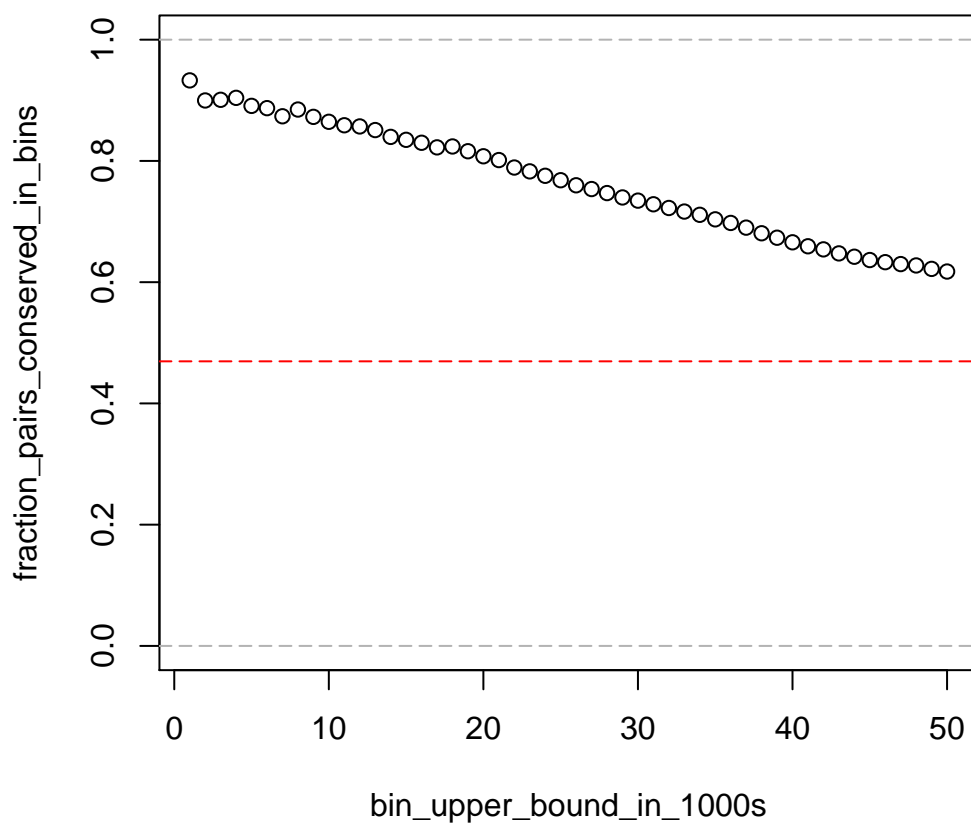

Supplement: s1 [file s1]

**Bin\_conservation\_minus\_bg\_Fr5L\_vs\_NW665.2**  
**PD-0.039022**

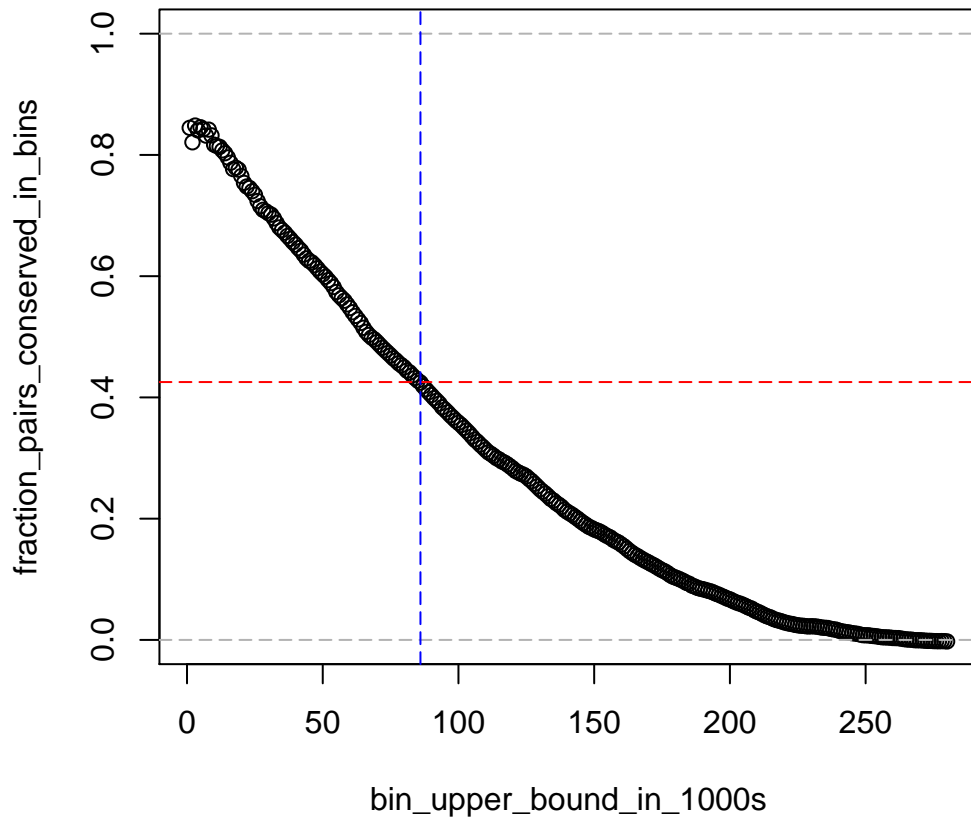

**Bin\_conservation\_minus\_bg\_Fr5L\_vs\_NW665.2**  
**PD-0.039022**

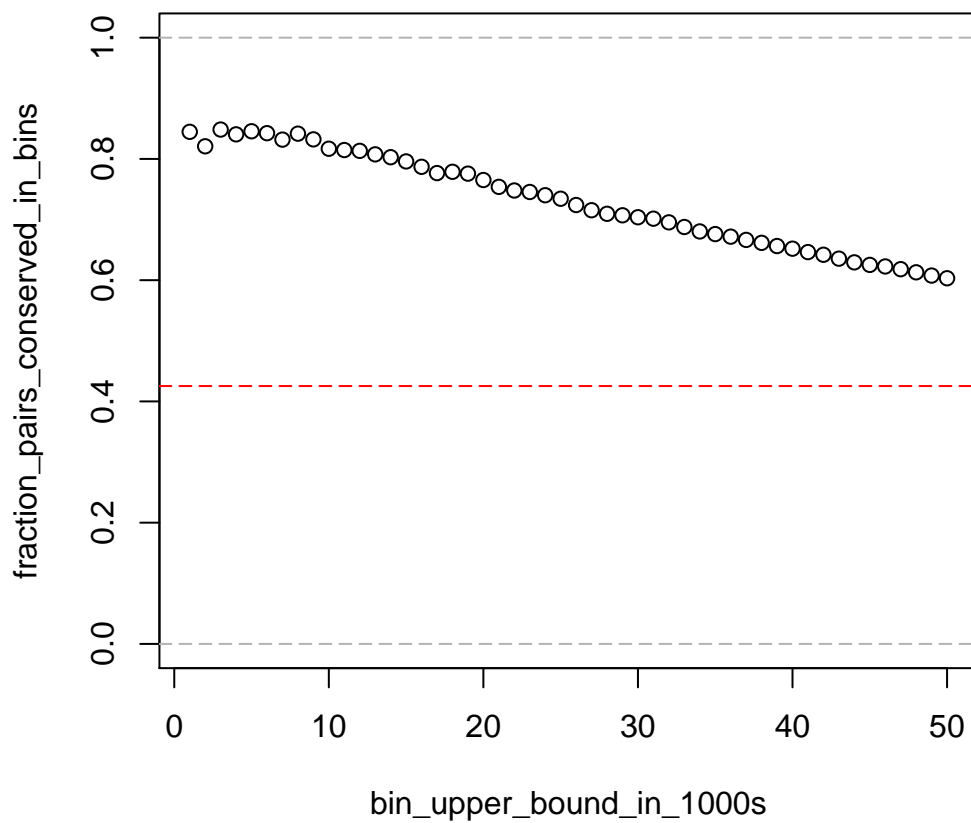

Supplement: s1 [file s1]

**Bin\_conservation\_minus\_bg\_FR483\_vs\_NTS-1**  
**PD-0.46005**

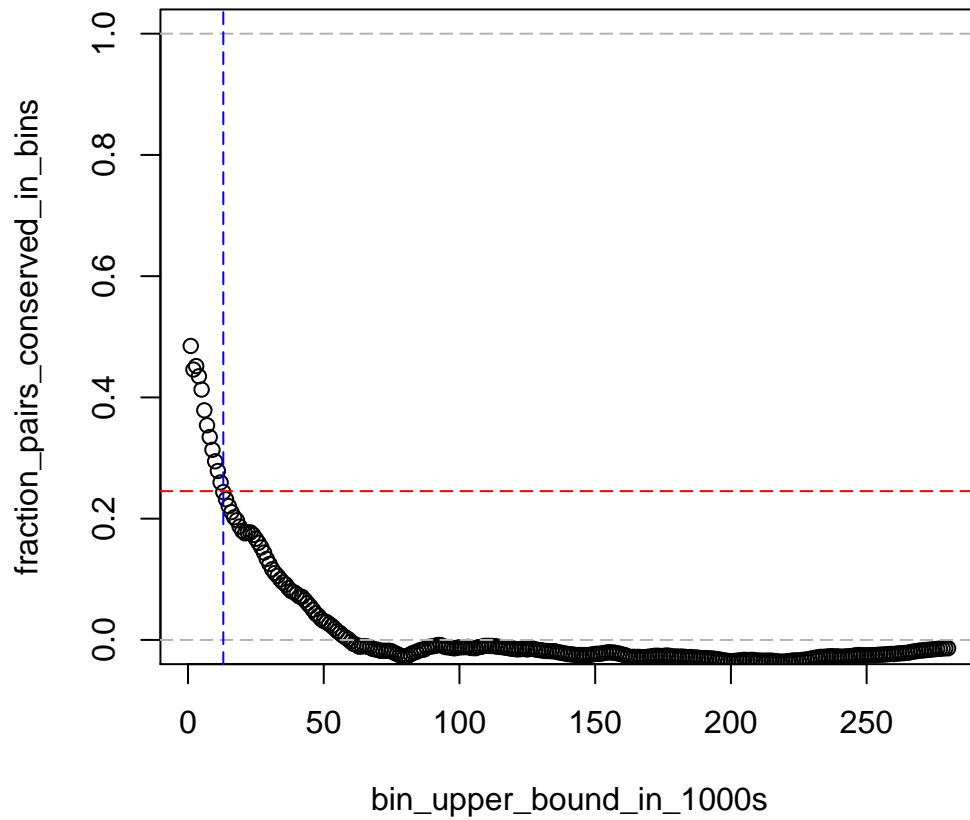

**Bin\_conservation\_minus\_bg\_FR483\_vs\_NTS-1**  
**PD-0.46005**

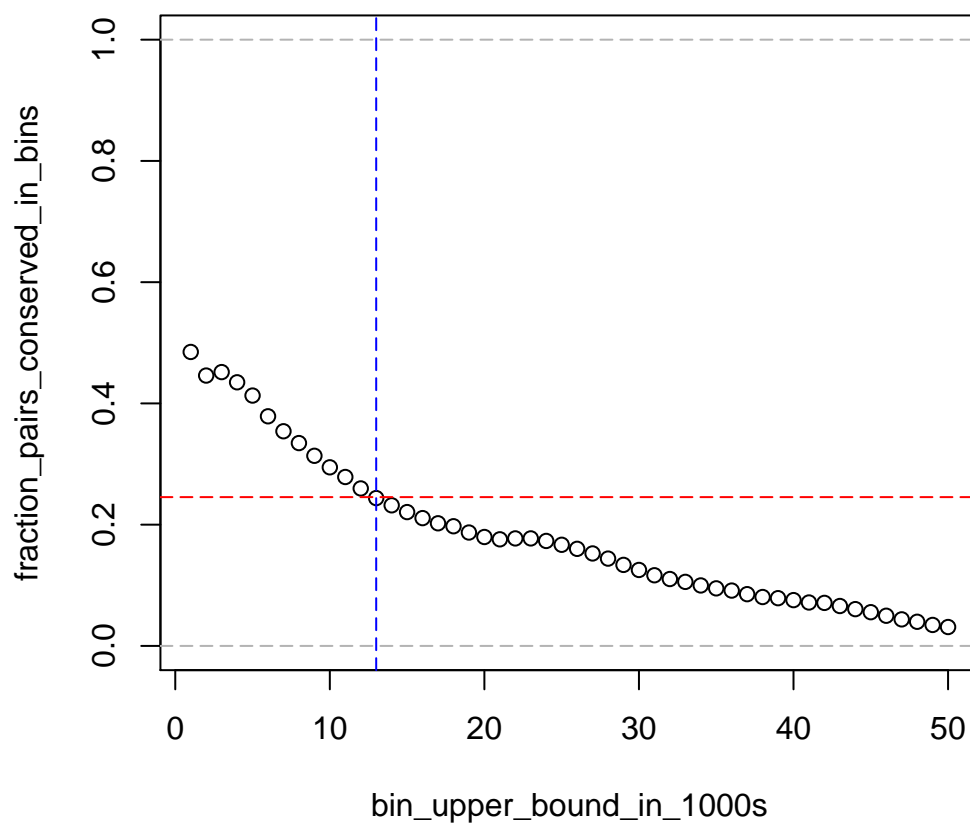

Supplement: s1 [file s1]

**Bin\_conservation\_minus\_bg\_Can0610SP\_vs\_NTS-1**  
**PD-0.048377**

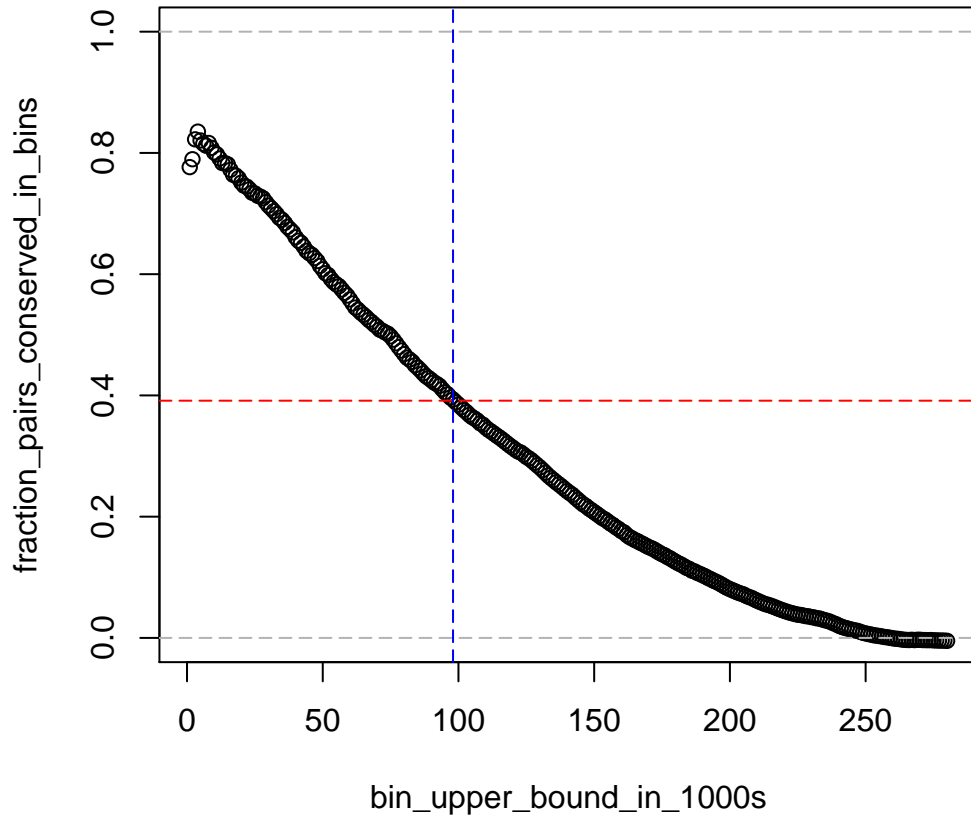

**Bin\_conservation\_minus\_bg\_Can0610SP\_vs\_NTS-1**  
**PD-0.048377**

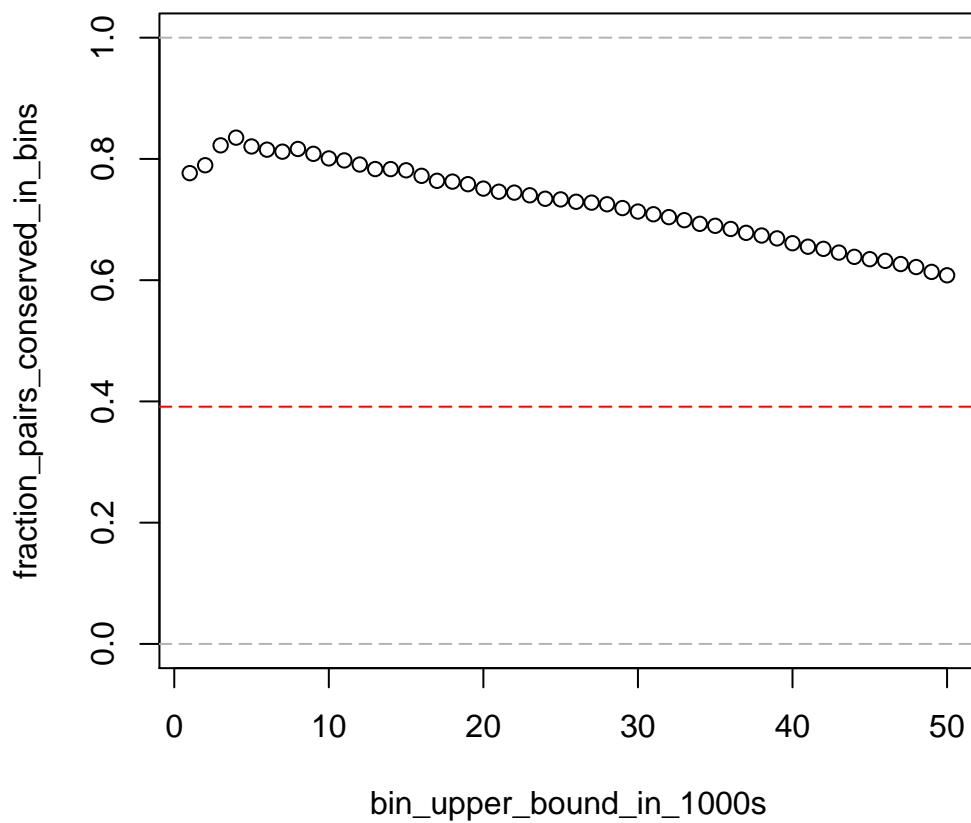

Supplement: s1 [file s1]

**Bin\_conservation\_minus\_bg\_CVA-1\_vs\_WI0606**  
**PD-0.46163**

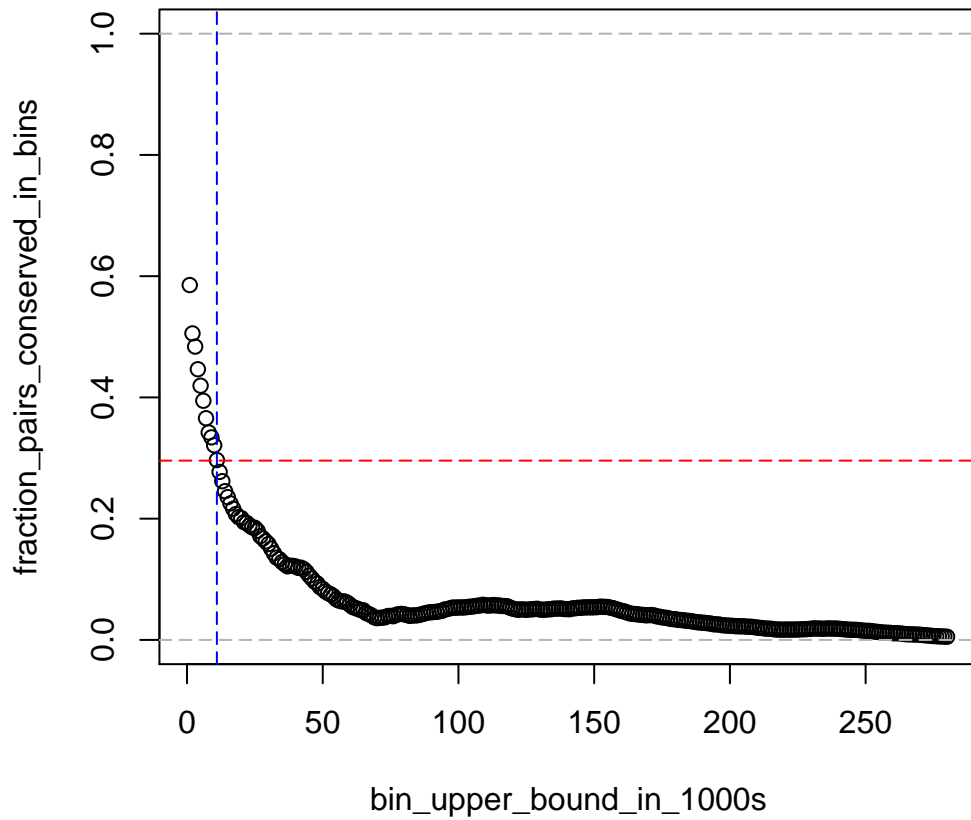

**Bin\_conservation\_minus\_bg\_CVA-1\_vs\_WI0606**  
**PD-0.46163**

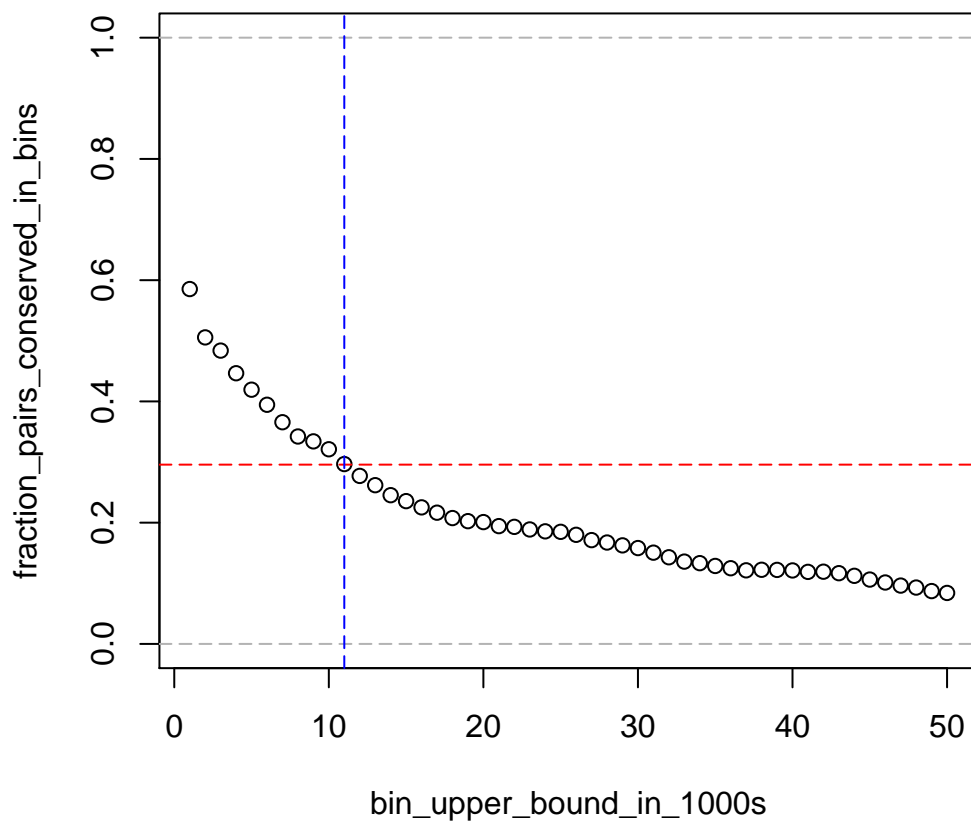

Supplement: s1 [file s1]

**Bin\_conservation\_minus\_bg\_CVB-1\_vs\_OR0704.2.2**  
**PD-0.051847**

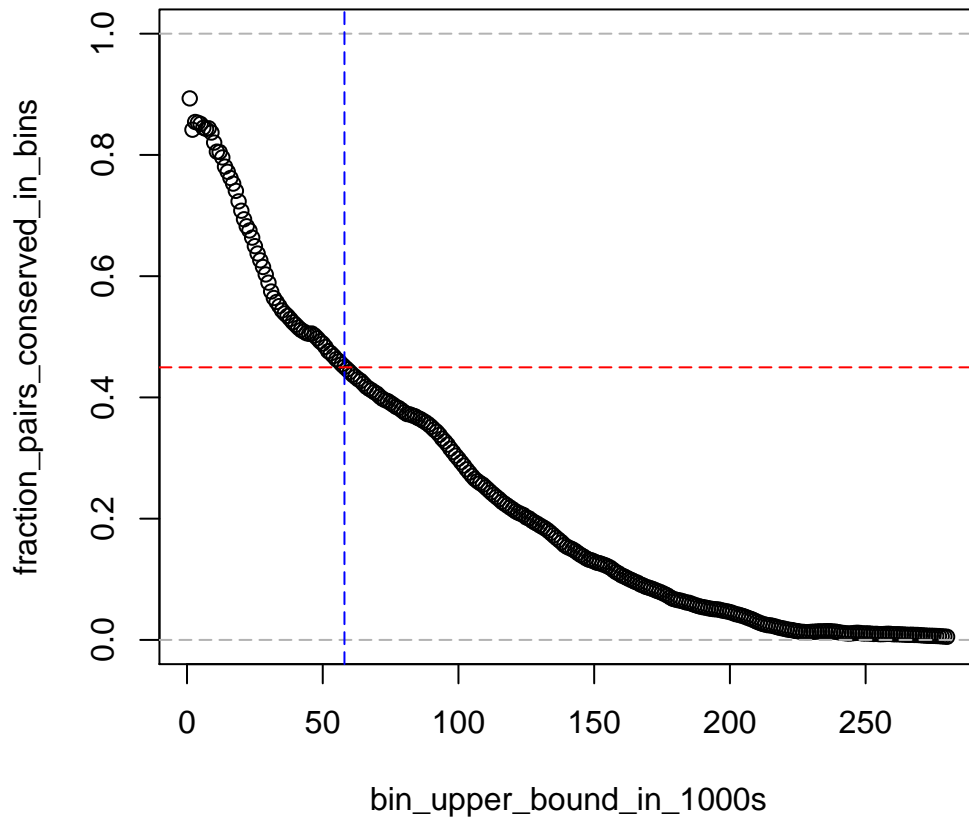

**Bin\_conservation\_minus\_bg\_CVB-1\_vs\_OR0704.2.2**  
**PD-0.051847**

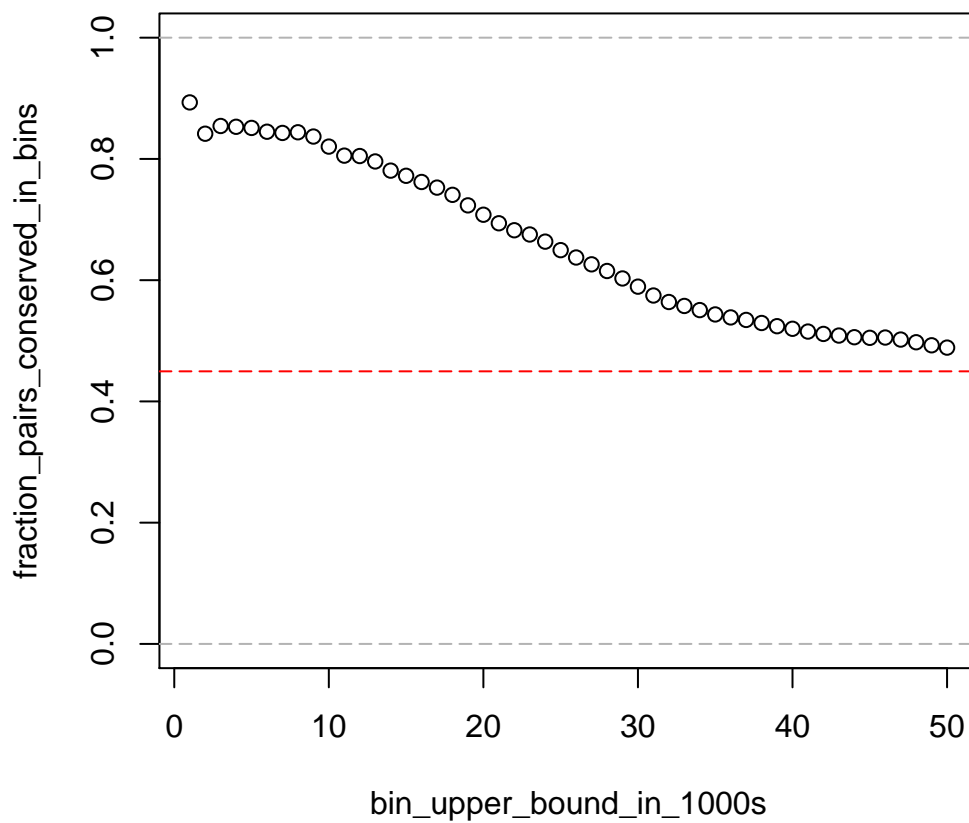

Supplement: s1 [file s1]

**Bin\_conservation\_minus\_bg\_Can18-4\_vs\_MN0810.1**  
**PD-0.467507**

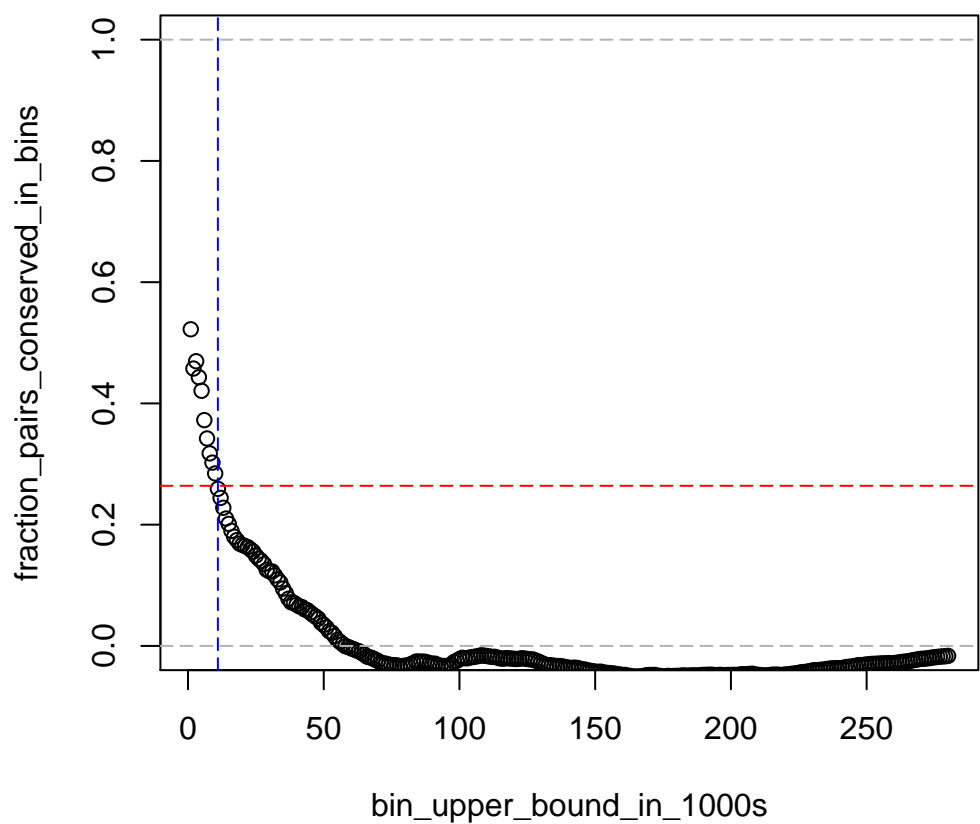

**Bin\_conservation\_minus\_bg\_Can18-4\_vs\_MN0810.1**  
**PD-0.467507**

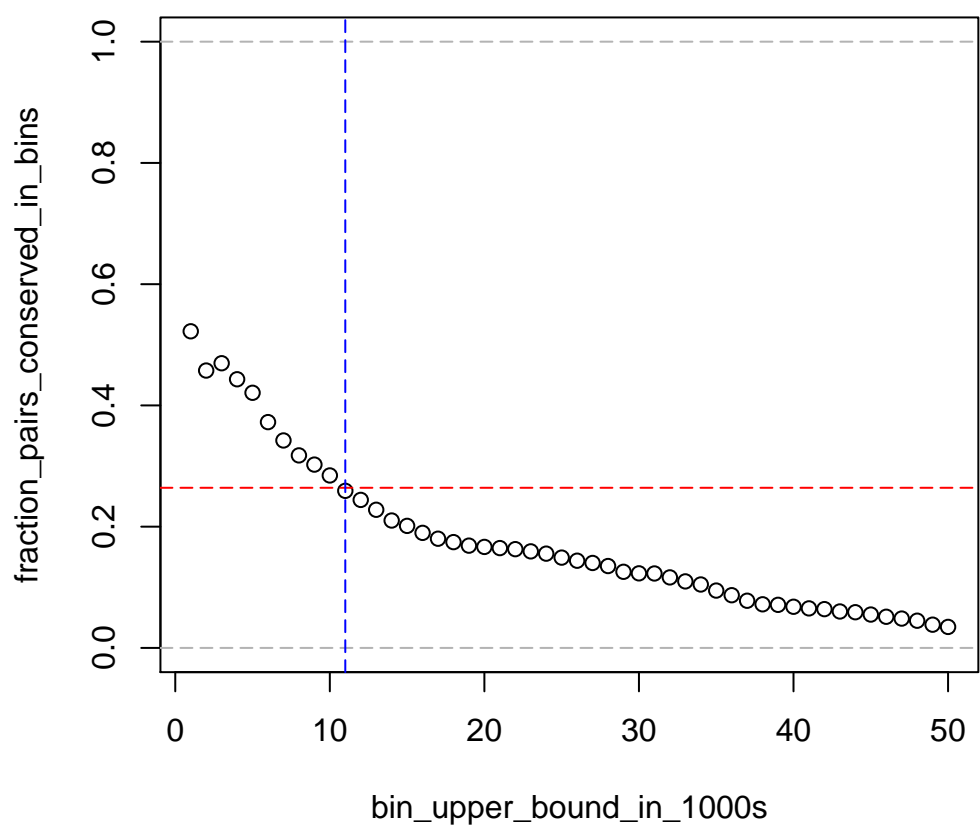

Supplement: s1 [file s1]

**Bin\_conservation\_minus\_bg\_CVA-1\_vs\_GM0701.1**  
**PD-0.447322**

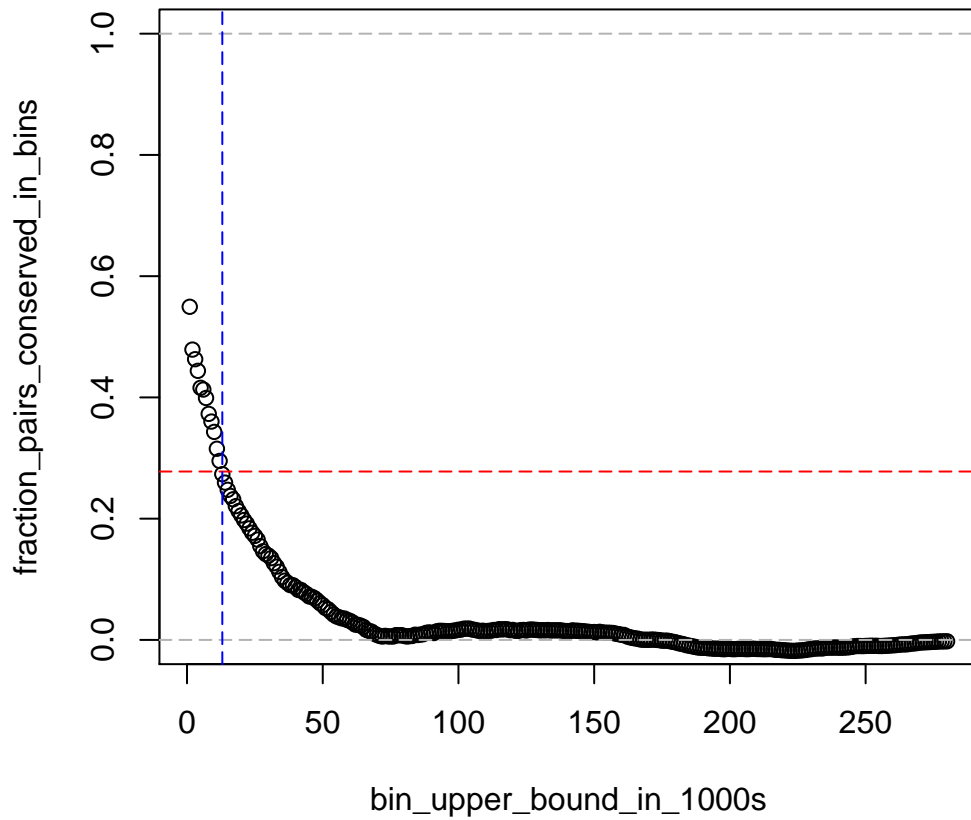

**Bin\_conservation\_minus\_bg\_CVA-1\_vs\_GM0701.1**  
**PD-0.447322**

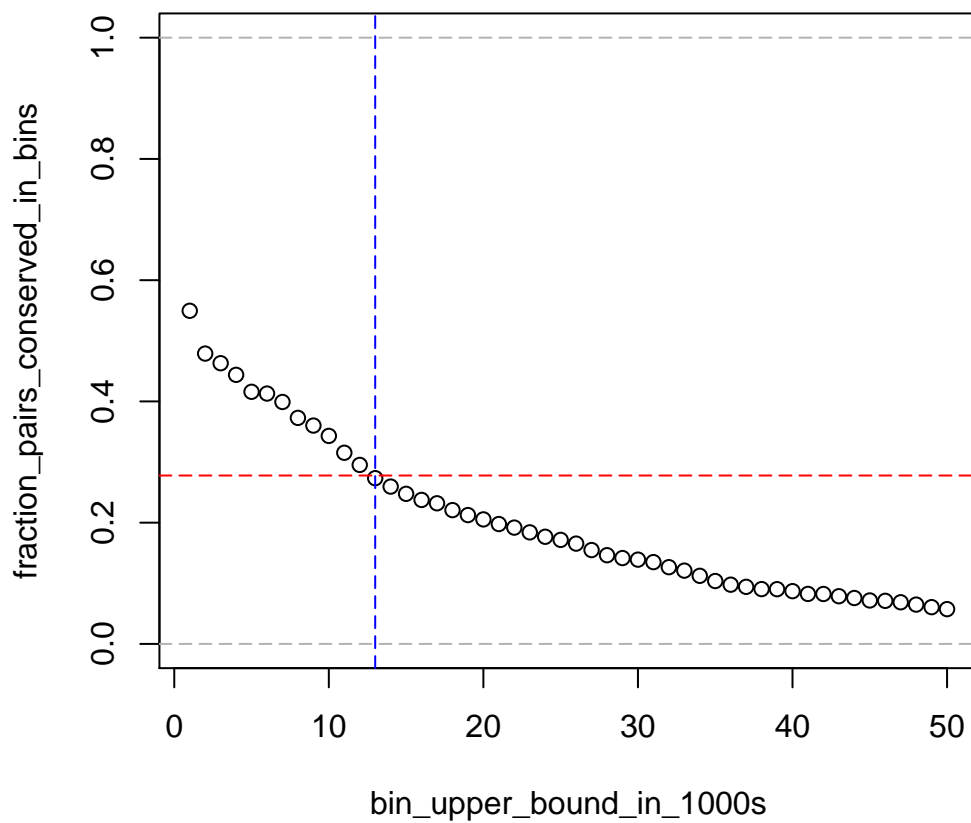

Supplement: s1 [file s1]

**Bin\_conservation\_minus\_bg\_FR483\_vs\_OR0704.2.2**  
**PD-0.041049**

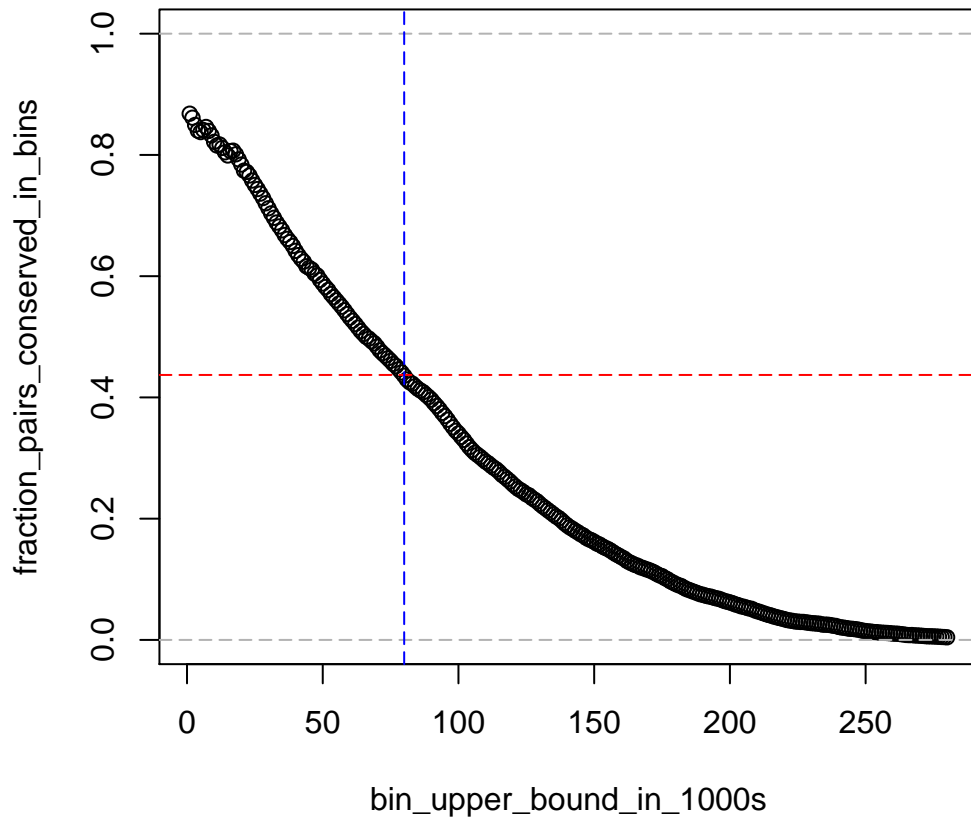

**Bin\_conservation\_minus\_bg\_FR483\_vs\_OR0704.2.2**  
**PD-0.041049**

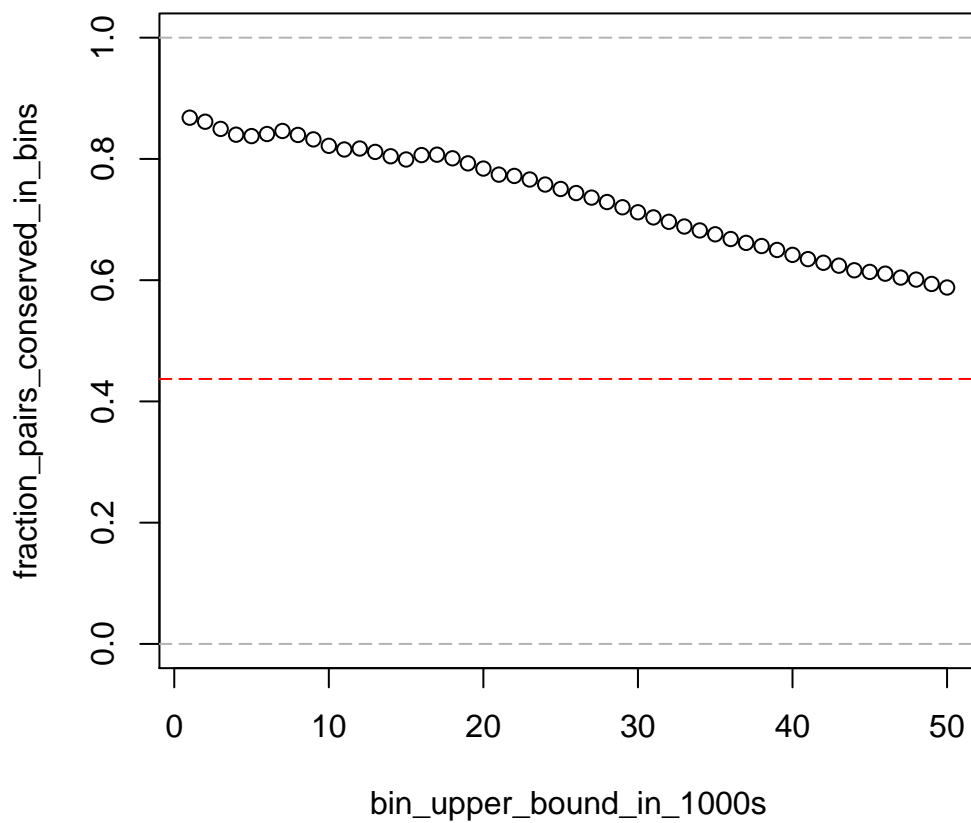

Supplement: s1 [file s1]

**Bin\_conservation\_minus\_bg\_Canal-1\_vs\_KS1B**  
**PD-0.693992**

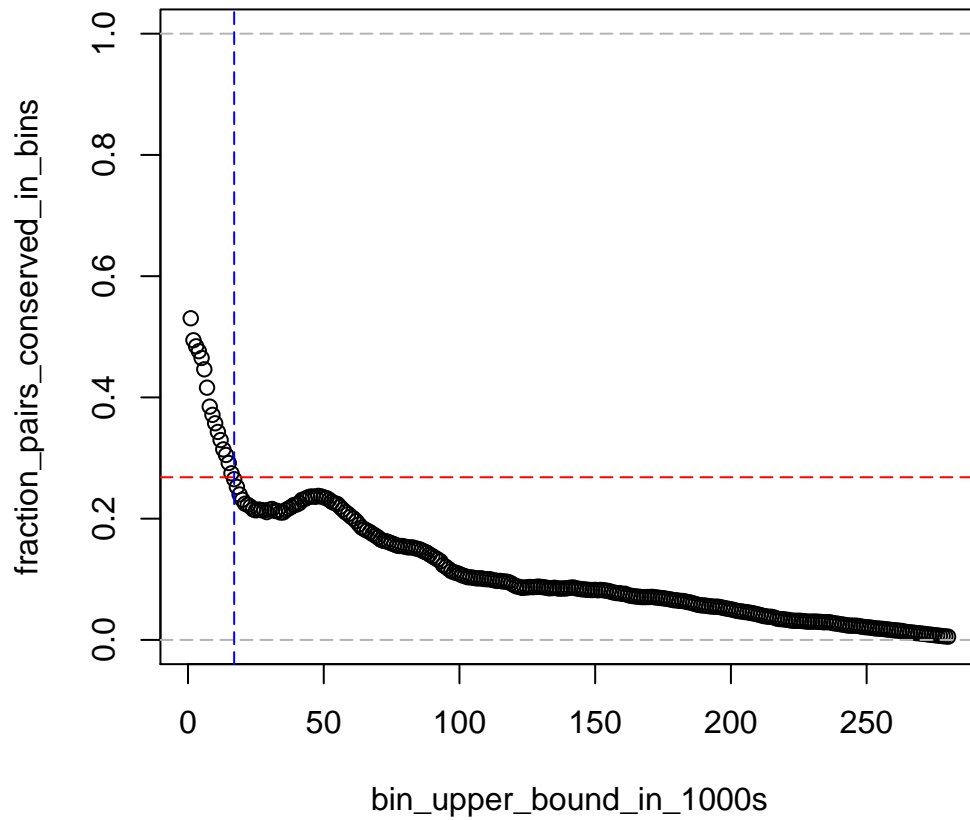

**Bin\_conservation\_minus\_bg\_Canal-1\_vs\_KS1B**  
**PD-0.693992**

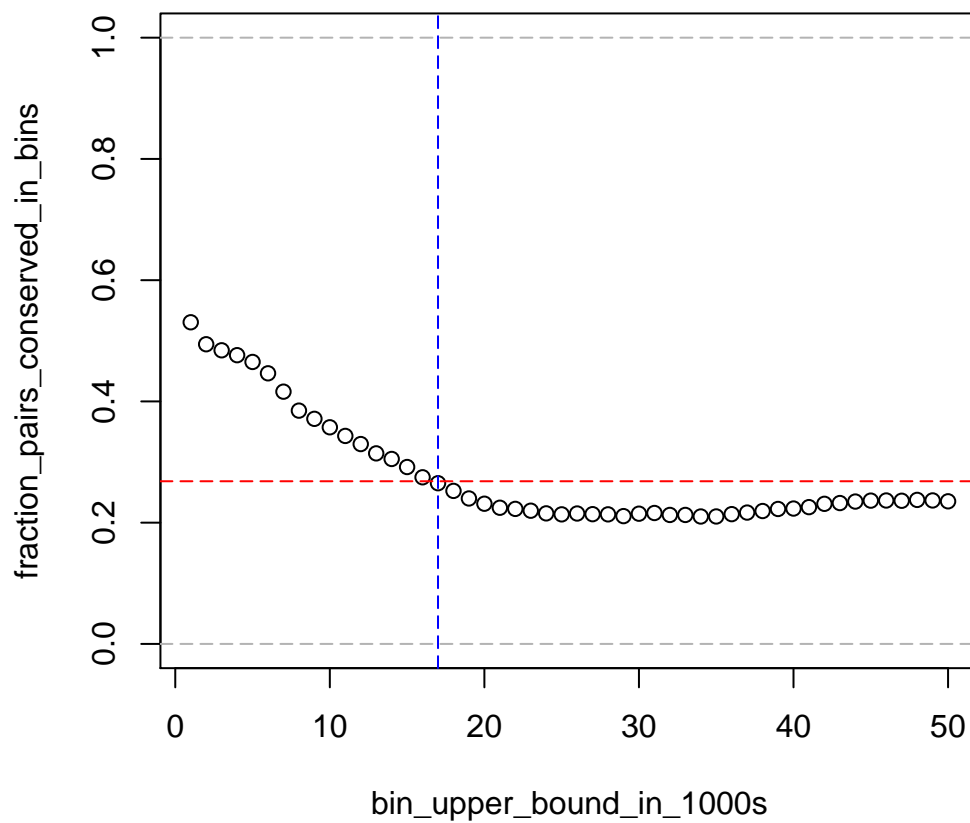

Supplement: s1 [file s1]

**Bin\_conservation\_minus\_bg\_IL-5-2s1\_vs\_NW665.2**  
**PD-0.664502**

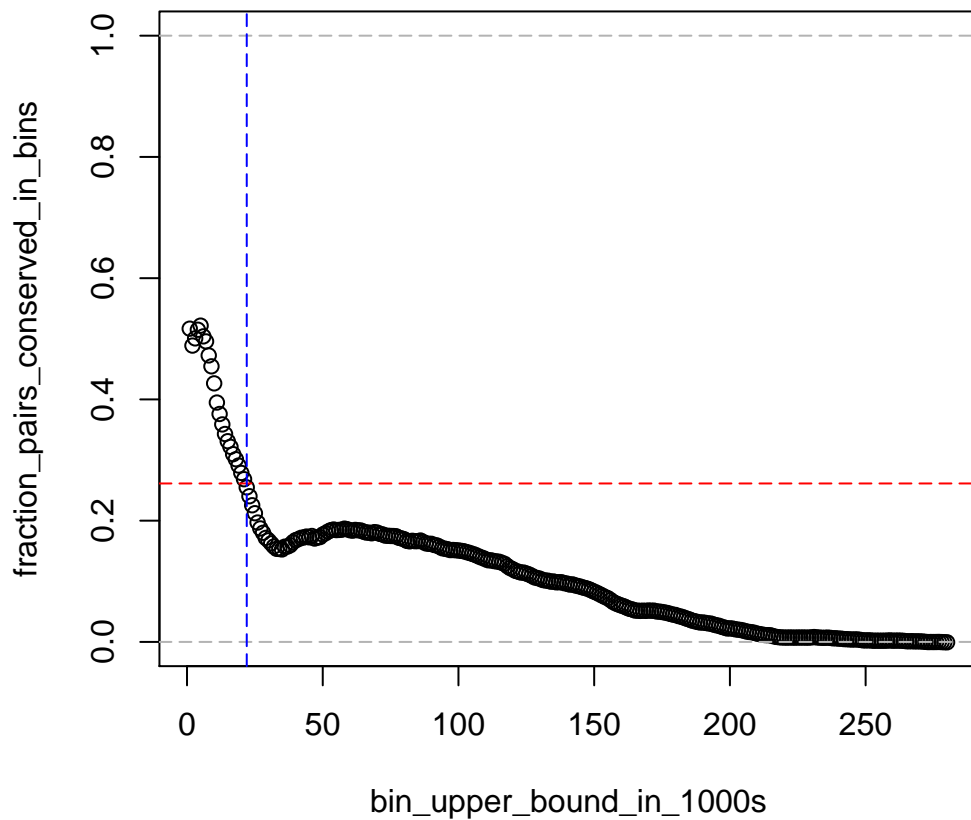

**Bin\_conservation\_minus\_bg\_IL-5-2s1\_vs\_NW665.2**  
**PD-0.664502**

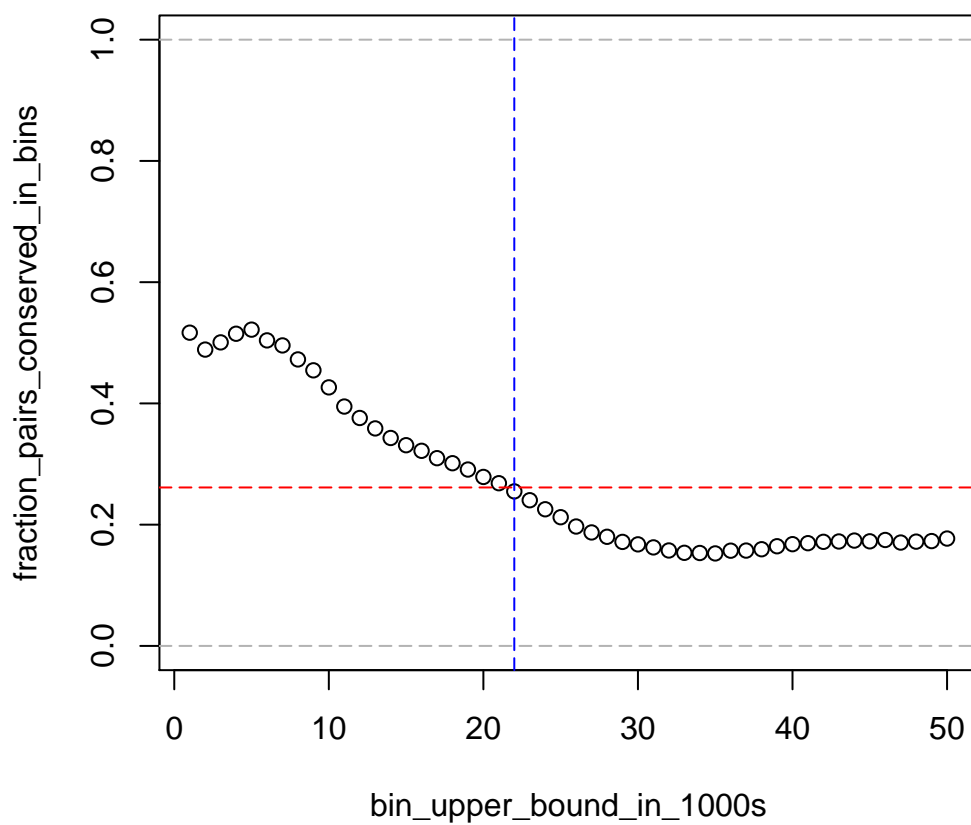

Supplement: s1 [file s1]

**Bin\_conservation\_minus\_bg\_MT325\_vs\_TN603.4.2**  
**PD-0.448682**

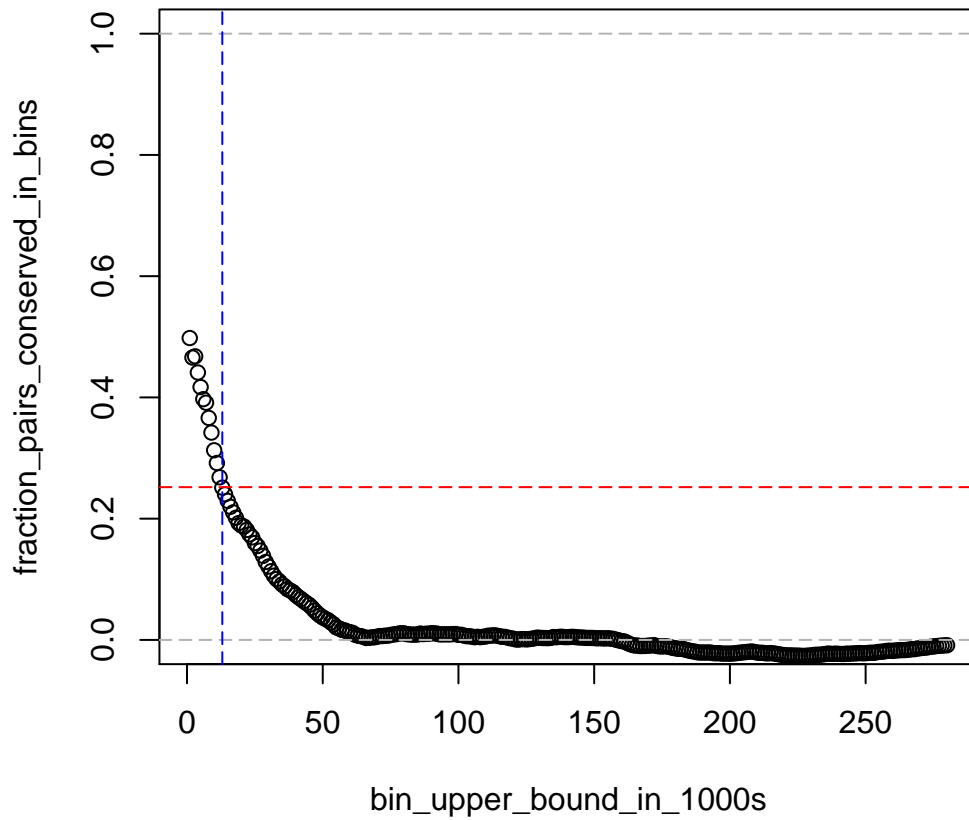

**Bin\_conservation\_minus\_bg\_MT325\_vs\_TN603.4.2**  
**PD-0.448682**

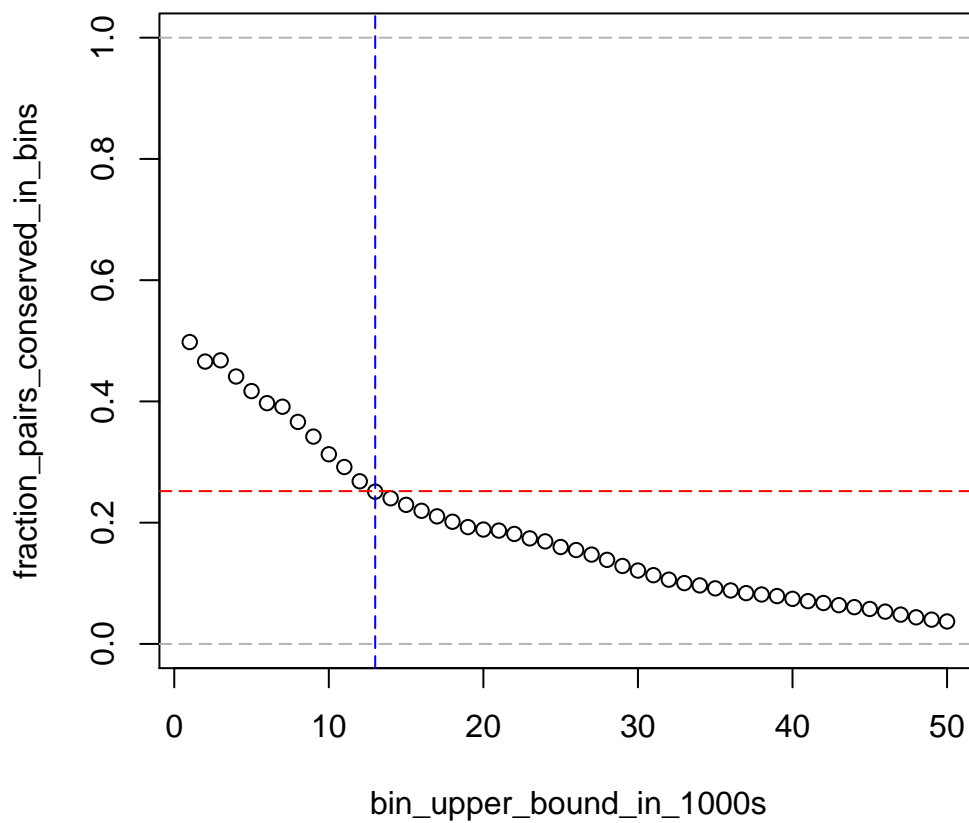

Supplement: s1 [file s1]

**Bin\_conservation\_minus\_bg\_NW665.2\_vs\_NY-2B**  
**PD-0.666493**

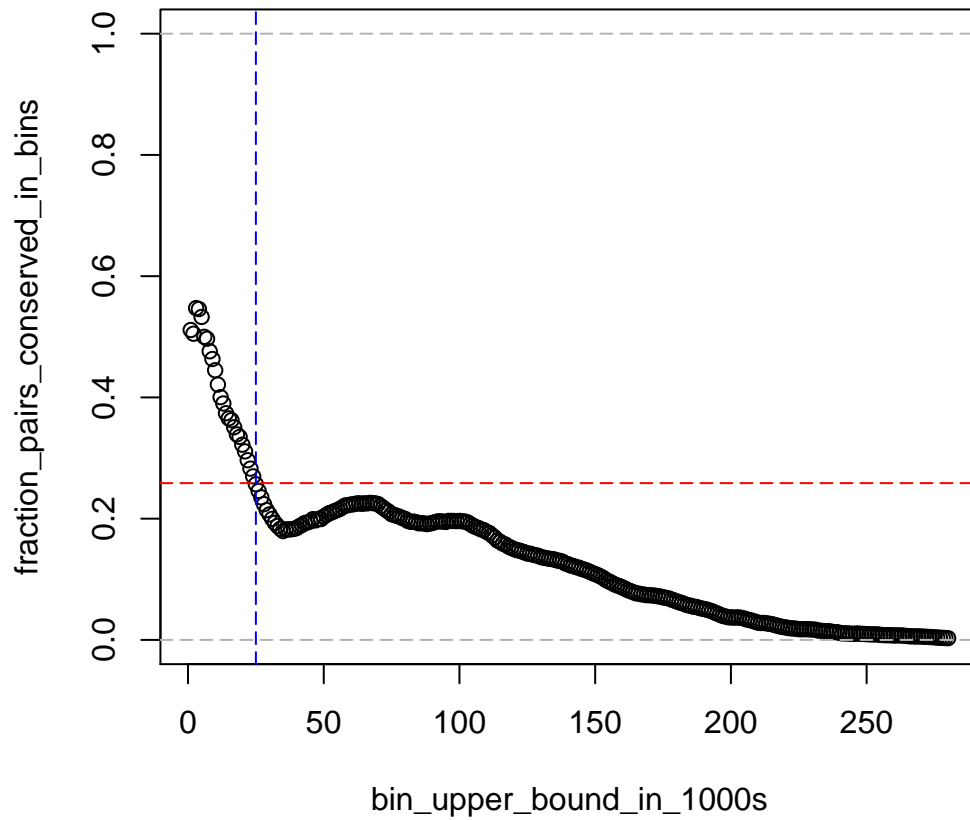

**Bin\_conservation\_minus\_bg\_NW665.2\_vs\_NY-2B**  
**PD-0.666493**

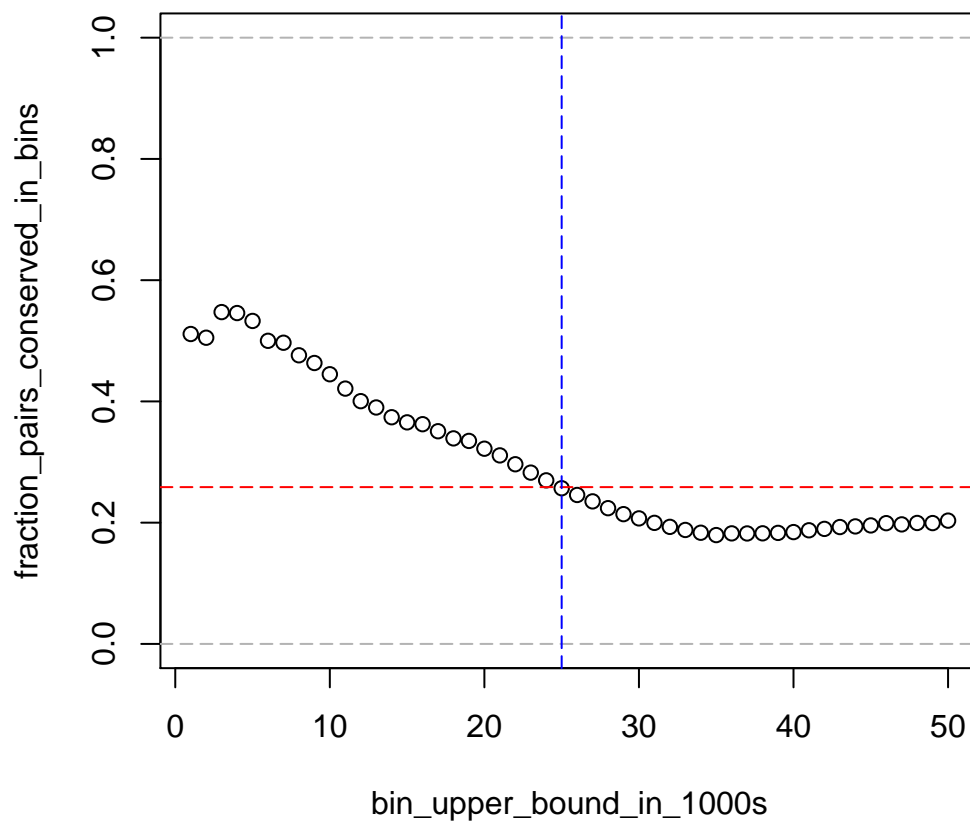

Supplement: s1 [file s1]

**Bin\_conservation\_minus\_bg\_CvsA1\_vs\_NTS-1**  
**PD-0.689591**

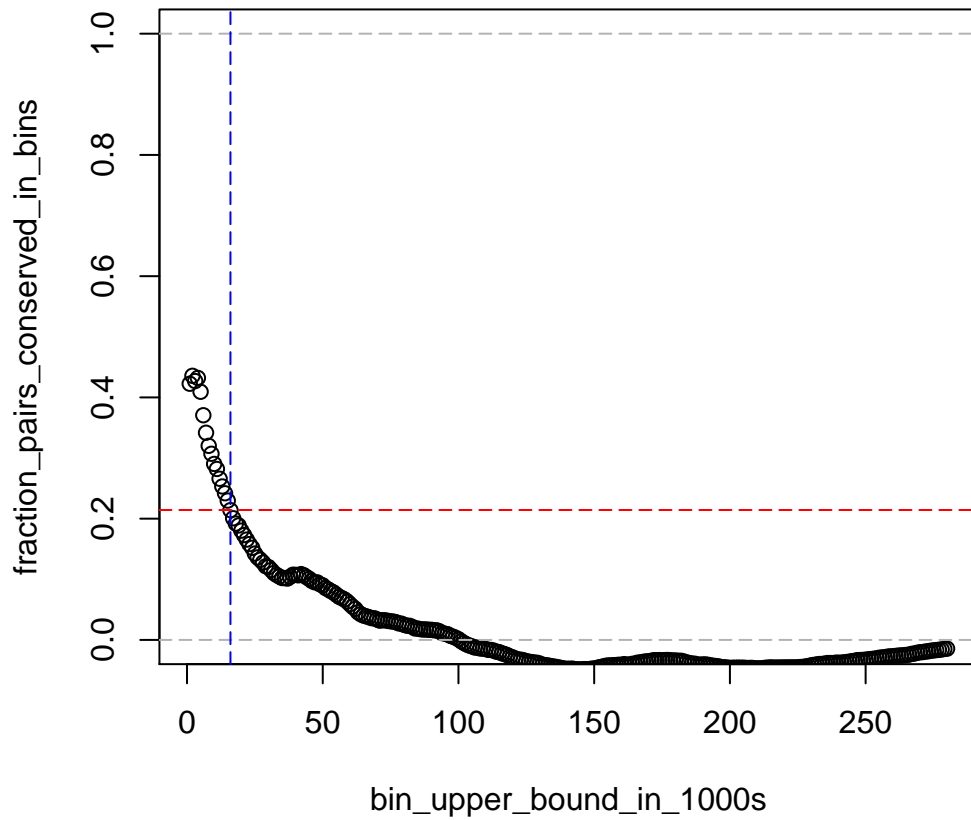

**Bin\_conservation\_minus\_bg\_CvsA1\_vs\_NTS-1**  
**PD-0.689591**

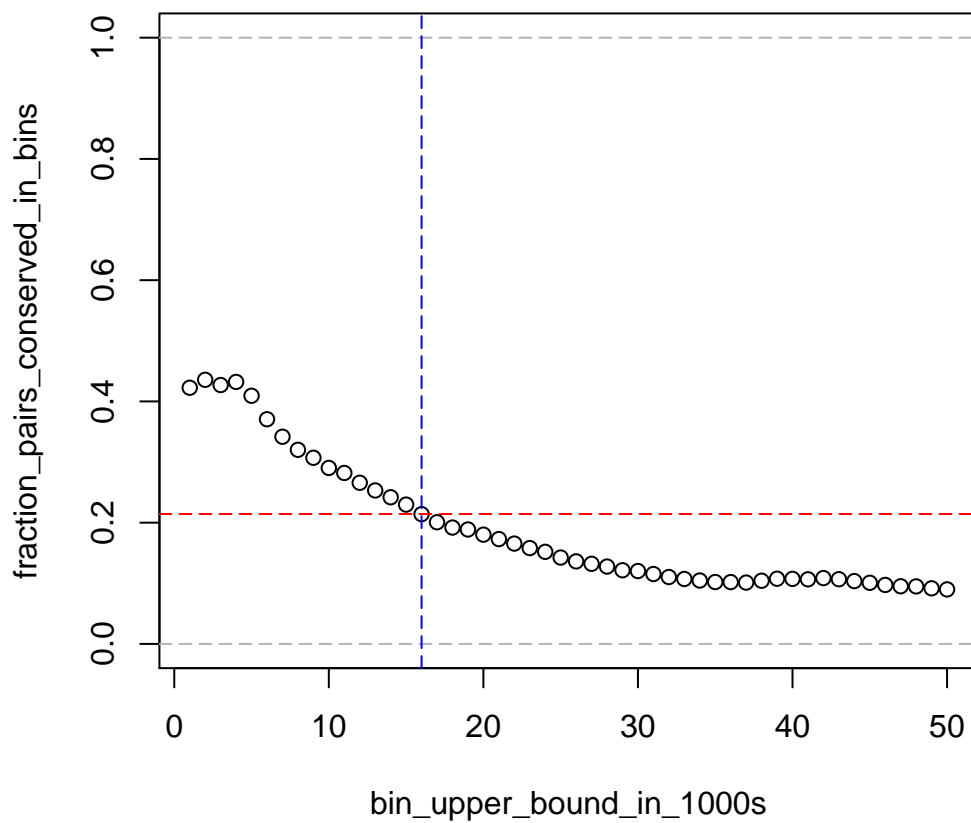

Supplement: s1 [file s1]

**Bin\_conservation\_minus\_bg\_AR158\_vs\_MO0605SPH**  
**PD-0.708926**

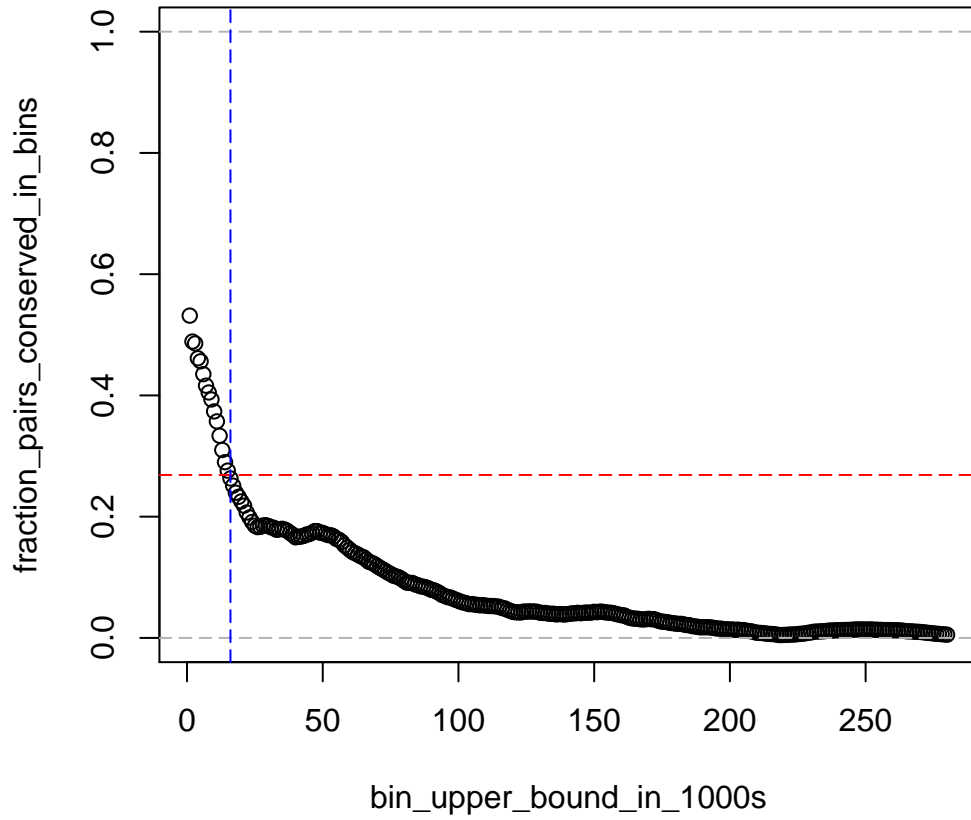

**Bin\_conservation\_minus\_bg\_AR158\_vs\_MO0605SPH**  
**PD-0.708926**

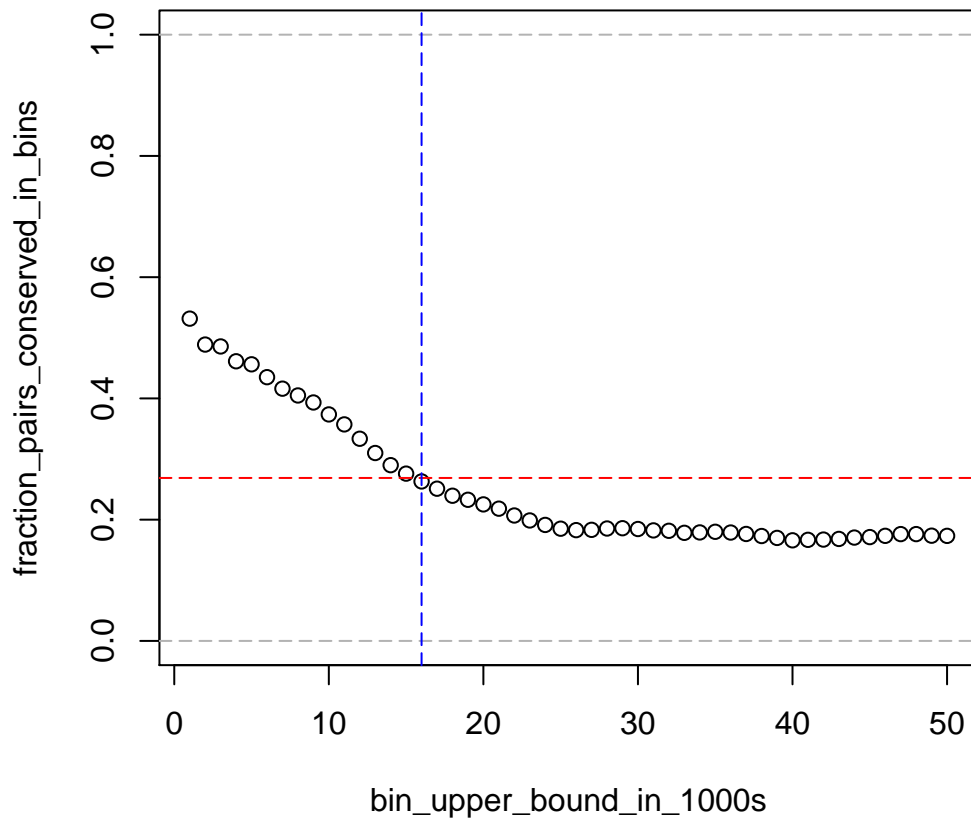

Supplement: s1 [file s1]

**Bin\_conservation\_minus\_bg\_CvsA1\_vs\_MA-1D**  
**PD-0.146147**

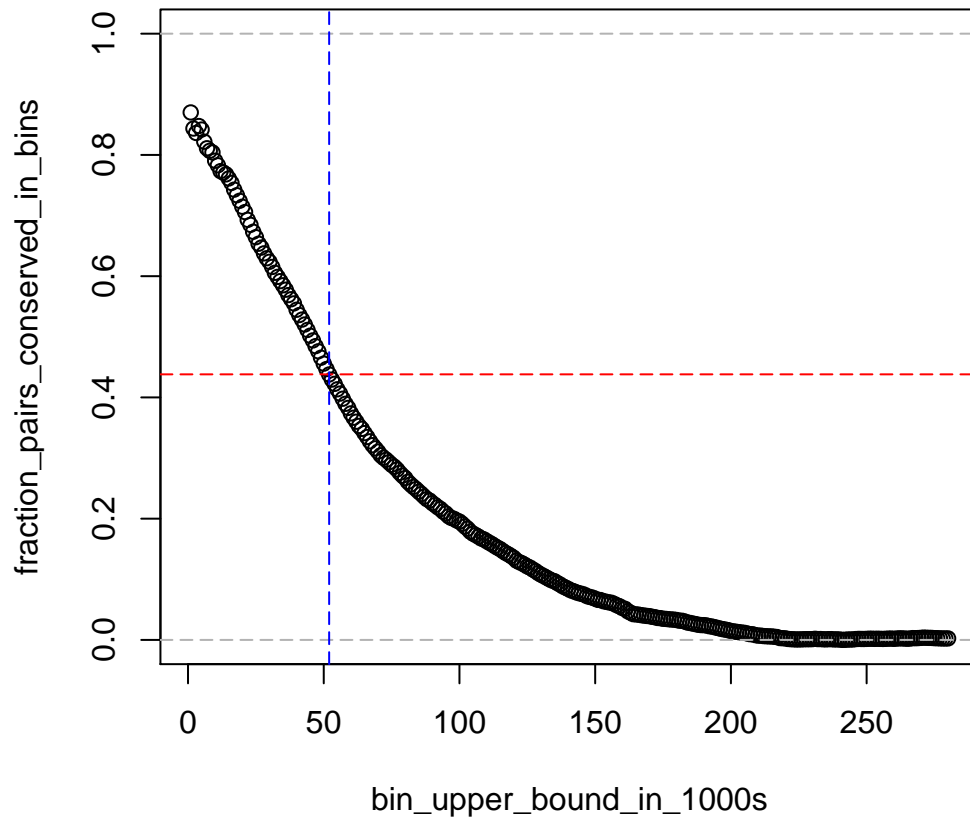

**Bin\_conservation\_minus\_bg\_CvsA1\_vs\_MA-1D**  
**PD-0.146147**

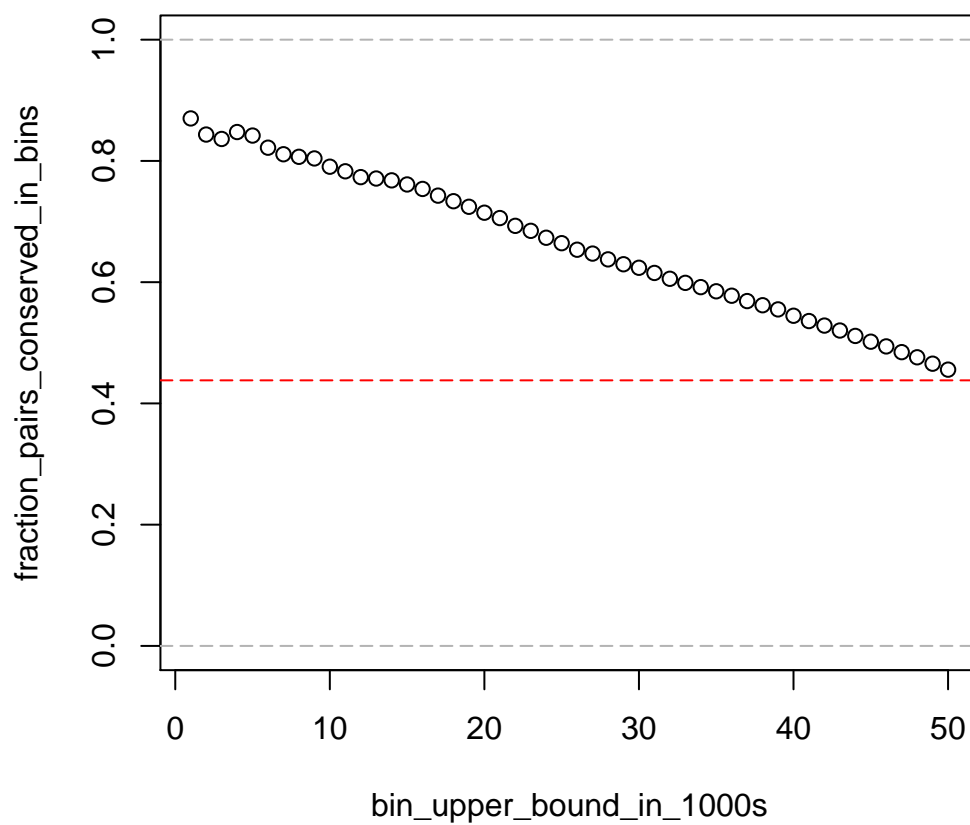

Supplement: s1 [file s1]

**Bin\_conservation\_minus\_bg\_AP110A\_vs\_CVG-1**  
**PD-0.020038**

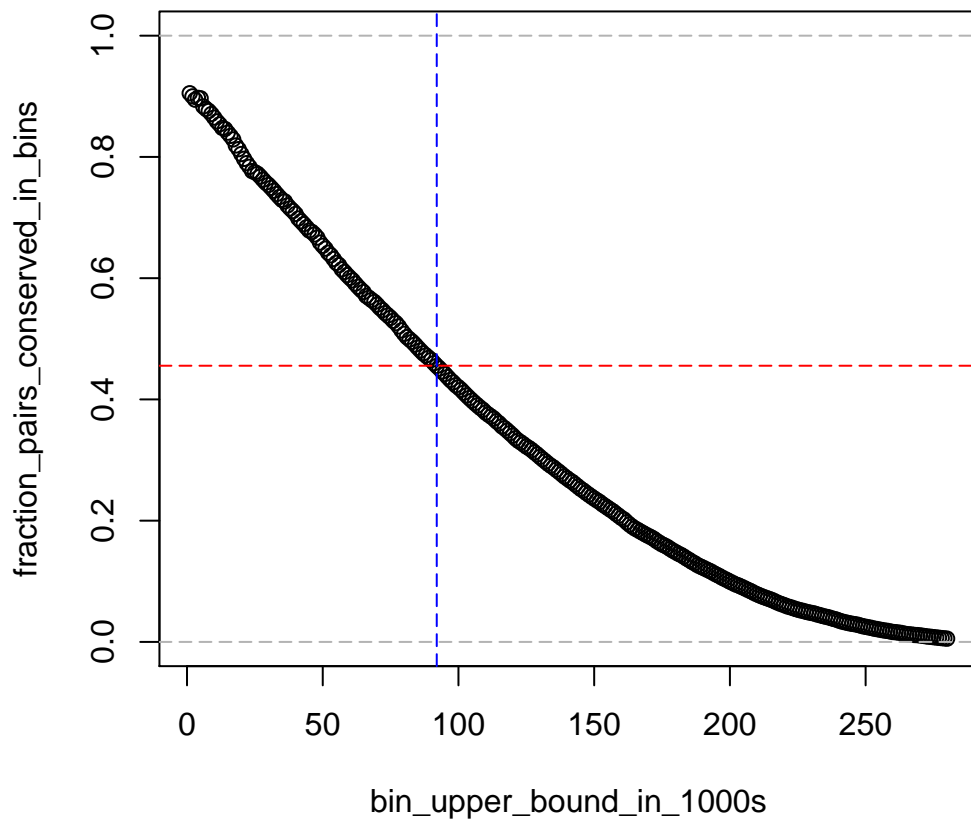

**Bin\_conservation\_minus\_bg\_AP110A\_vs\_CVG-1**  
**PD-0.020038**

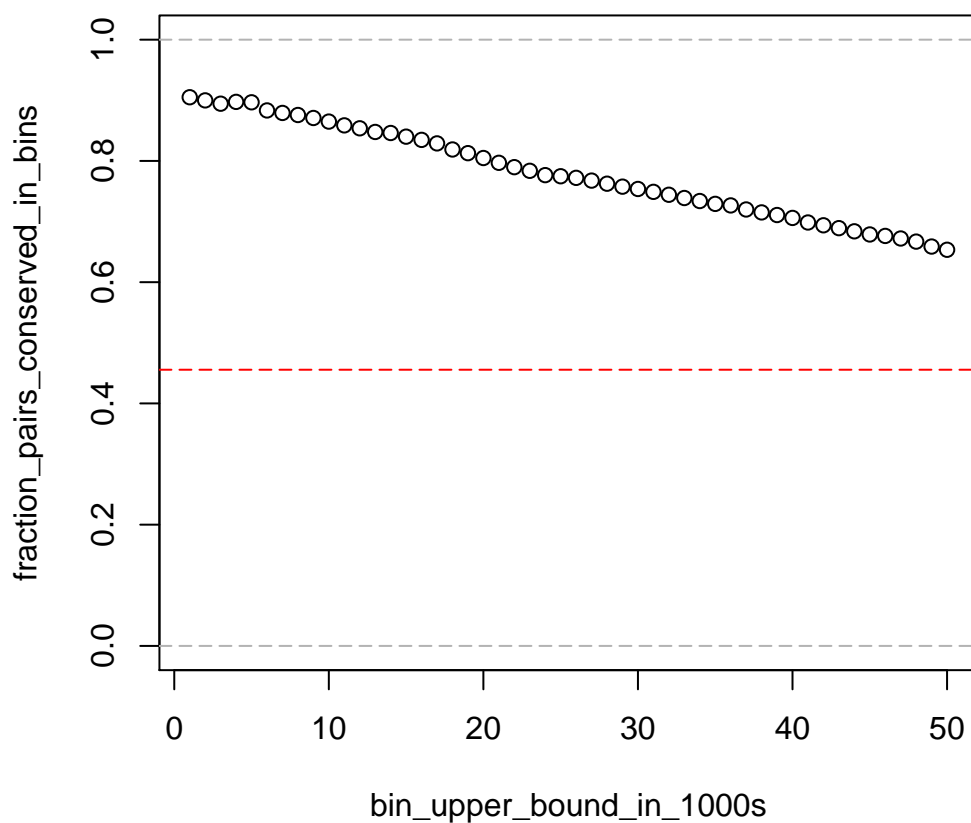

Supplement: s1 [file s1]

**Bin\_conservation\_minus\_bg\_CviKI\_vs\_NE-JV-1**  
**PD-0.685363**

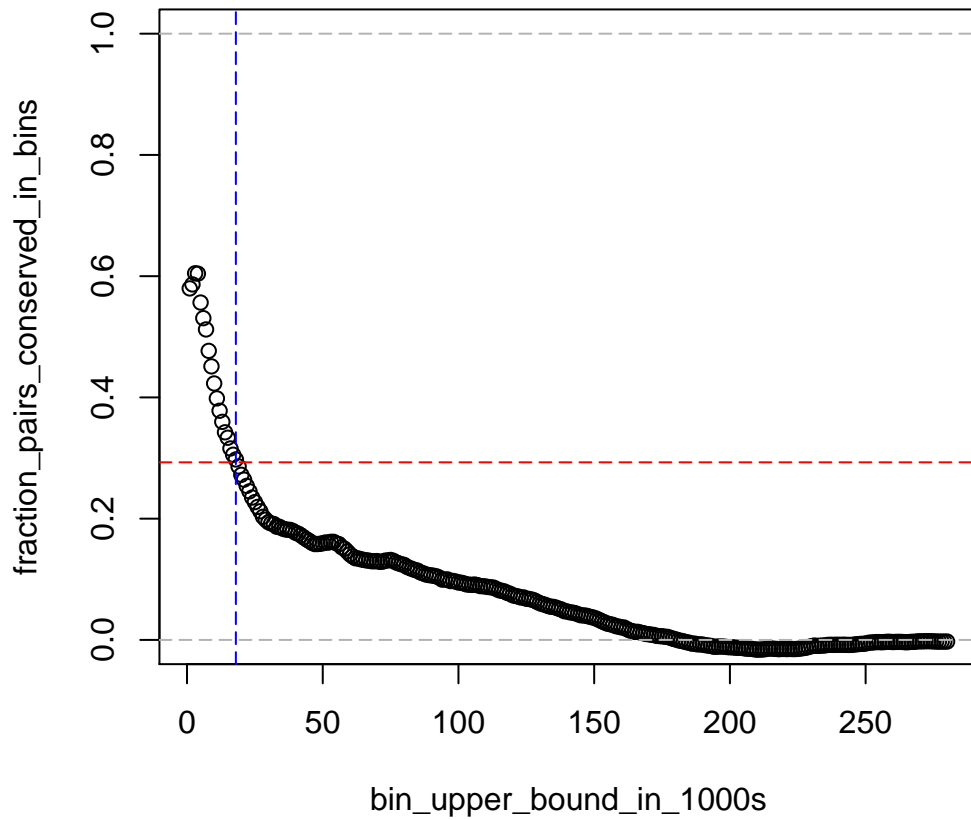

**Bin\_conservation\_minus\_bg\_CviKI\_vs\_NE-JV-1**  
**PD-0.685363**

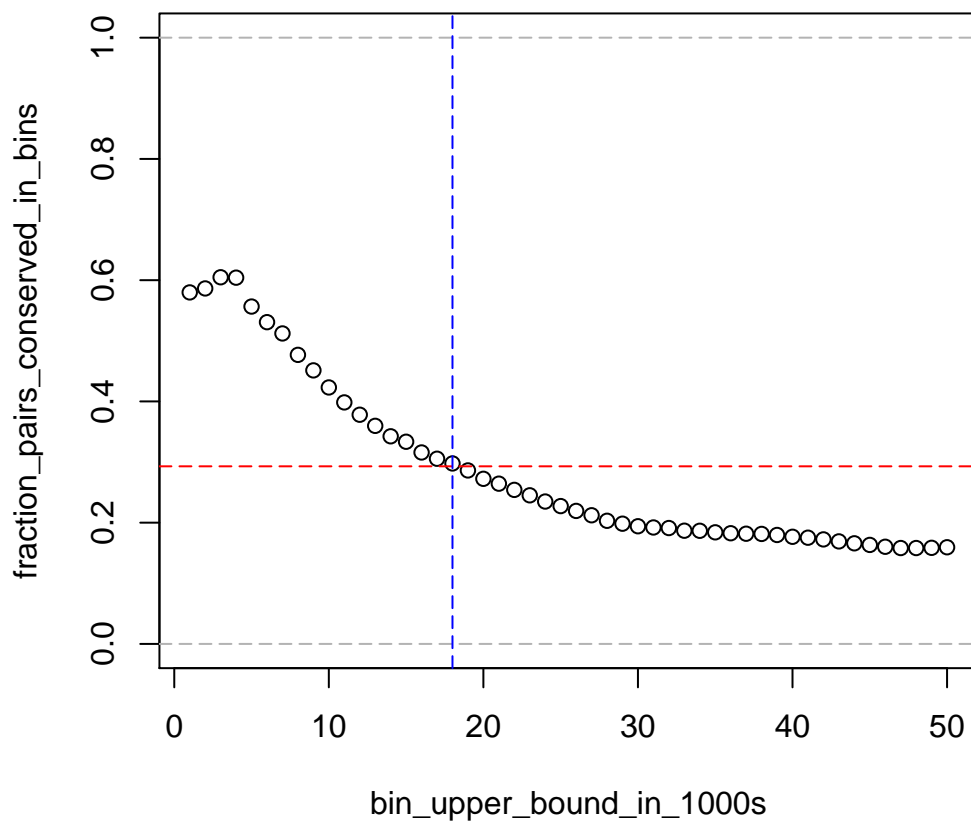

Supplement: s1 [file s1]

**Bin\_conservation\_minus\_bg\_CVA-1\_vs\_MT325**  
**PD-0.020553**

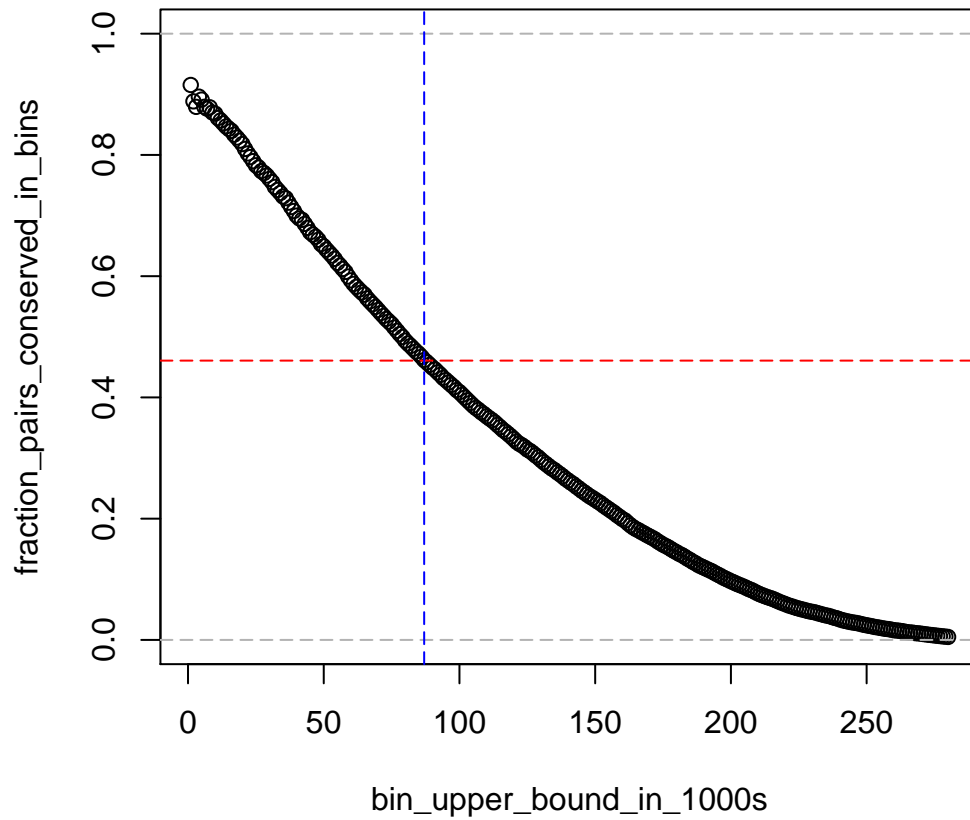

**Bin\_conservation\_minus\_bg\_CVA-1\_vs\_MT325**  
**PD-0.020553**

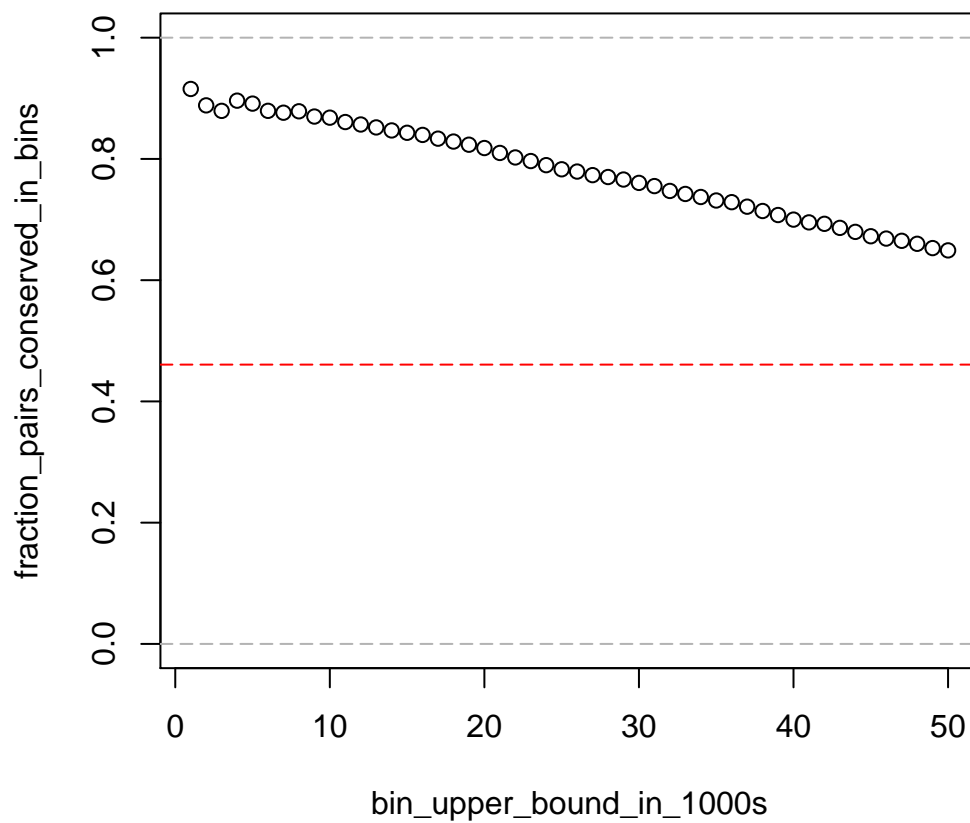

Supplement: s1 [file s1]

**Bin\_conservation\_minus\_bg\_CZ-2\_vs\_OR0704.2.2**  
**PD-0.012101**

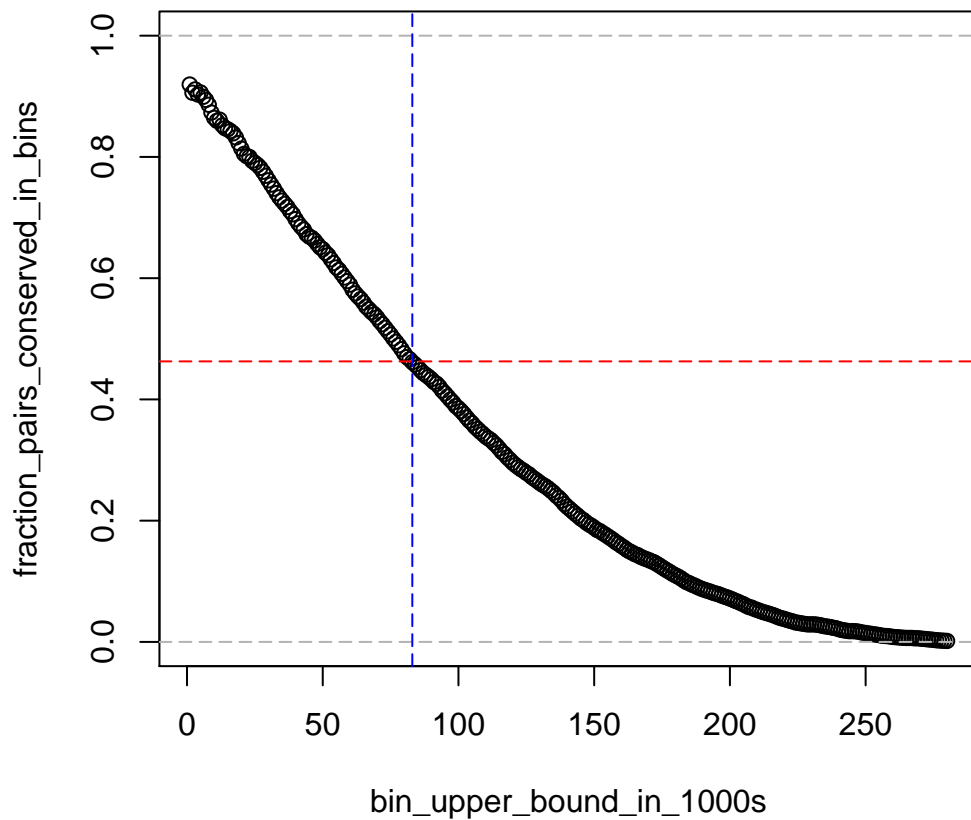

**Bin\_conservation\_minus\_bg\_CZ-2\_vs\_OR0704.2.2**  
**PD-0.012101**

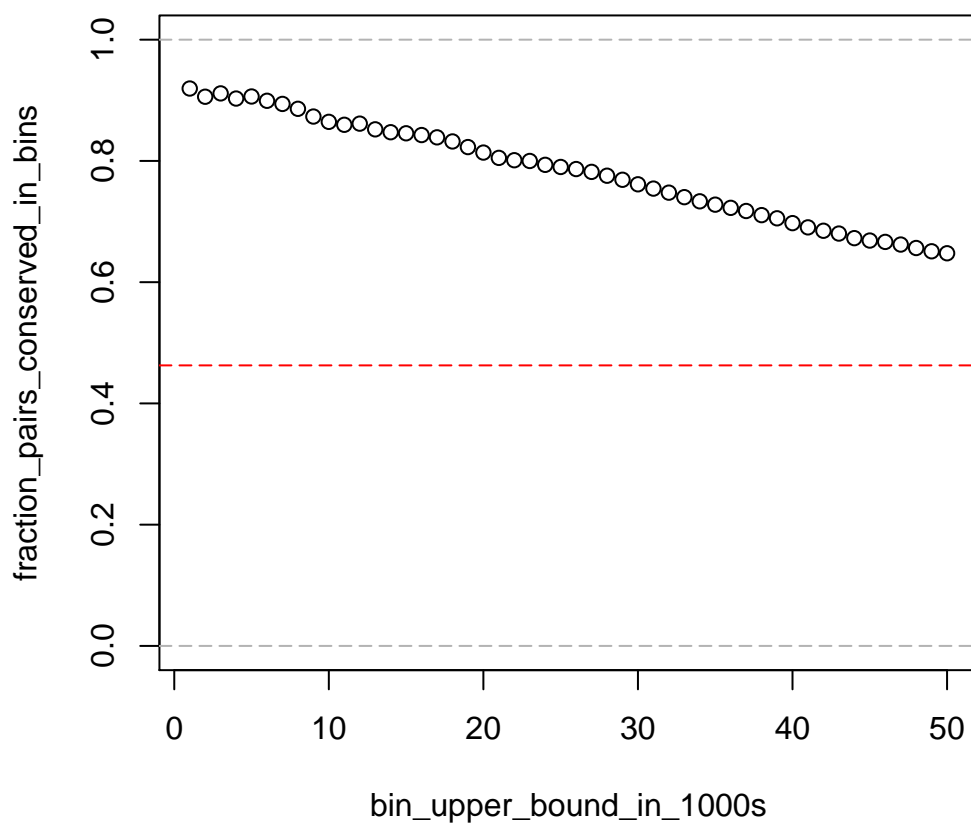

Supplement: s1 [file s1]

**Bin\_conservation\_minus\_bg\_CviKI\_vs\_OR0704.3**  
**PD-0.693825**

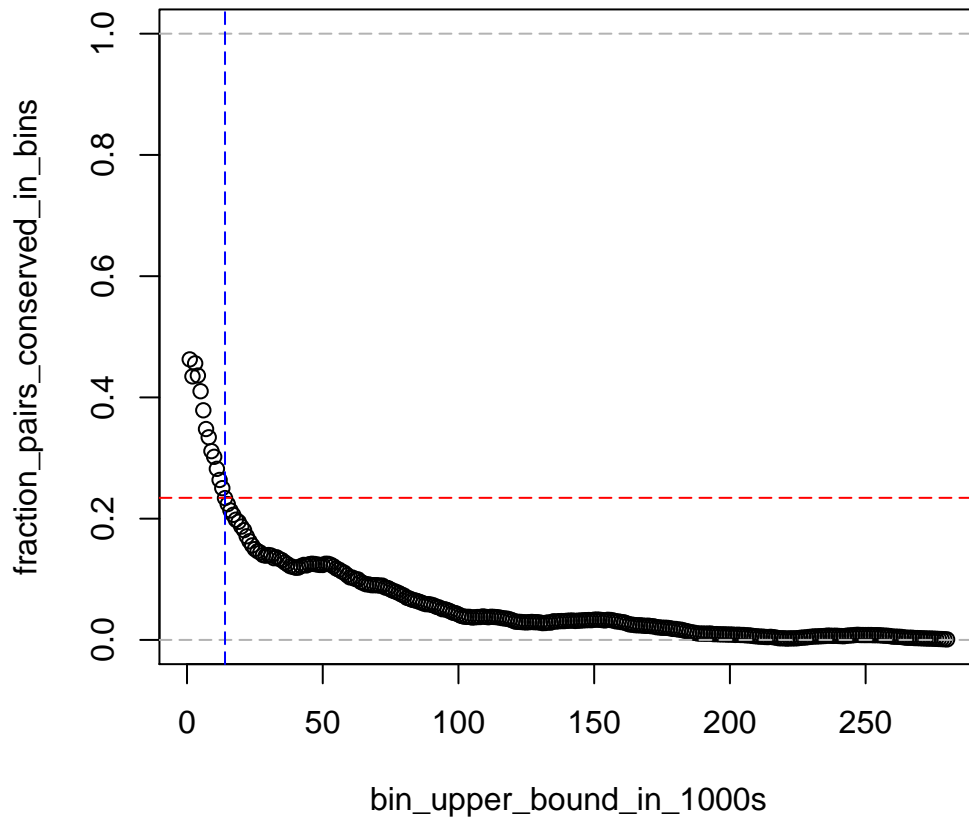

**Bin\_conservation\_minus\_bg\_CviKI\_vs\_OR0704.3**  
**PD-0.693825**

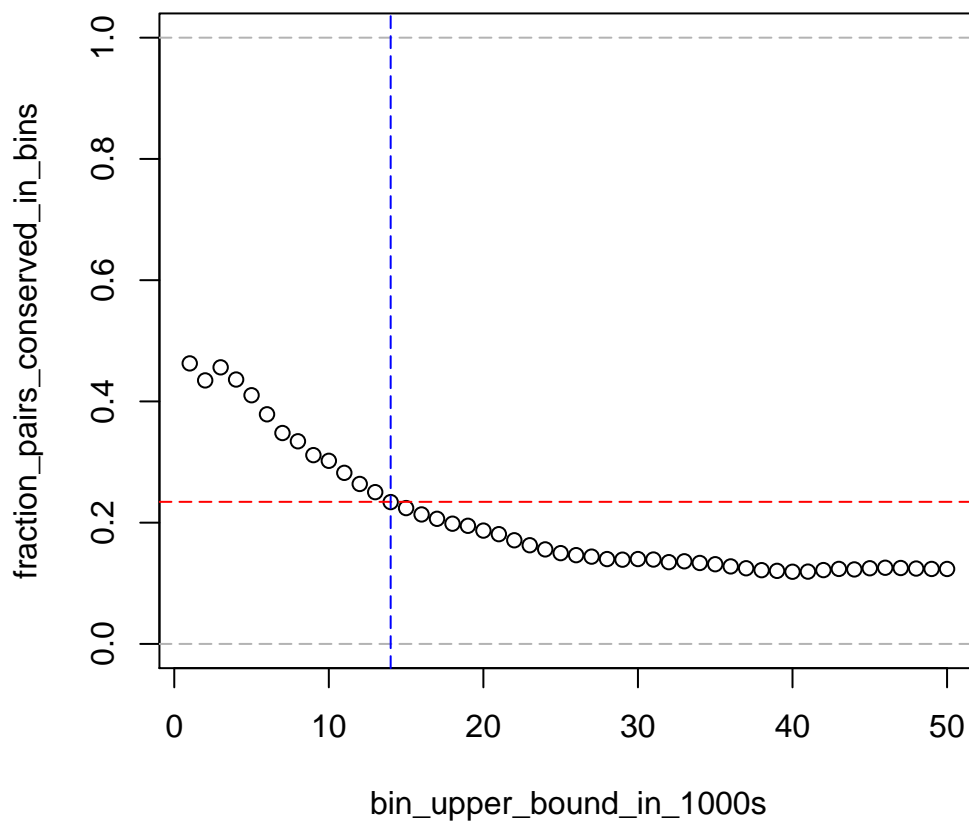

Supplement: s1 [file s1]

**Bin\_conservation\_minus\_bg\_MT325\_vs\_NE-JV-3**  
**PD-0.459612**

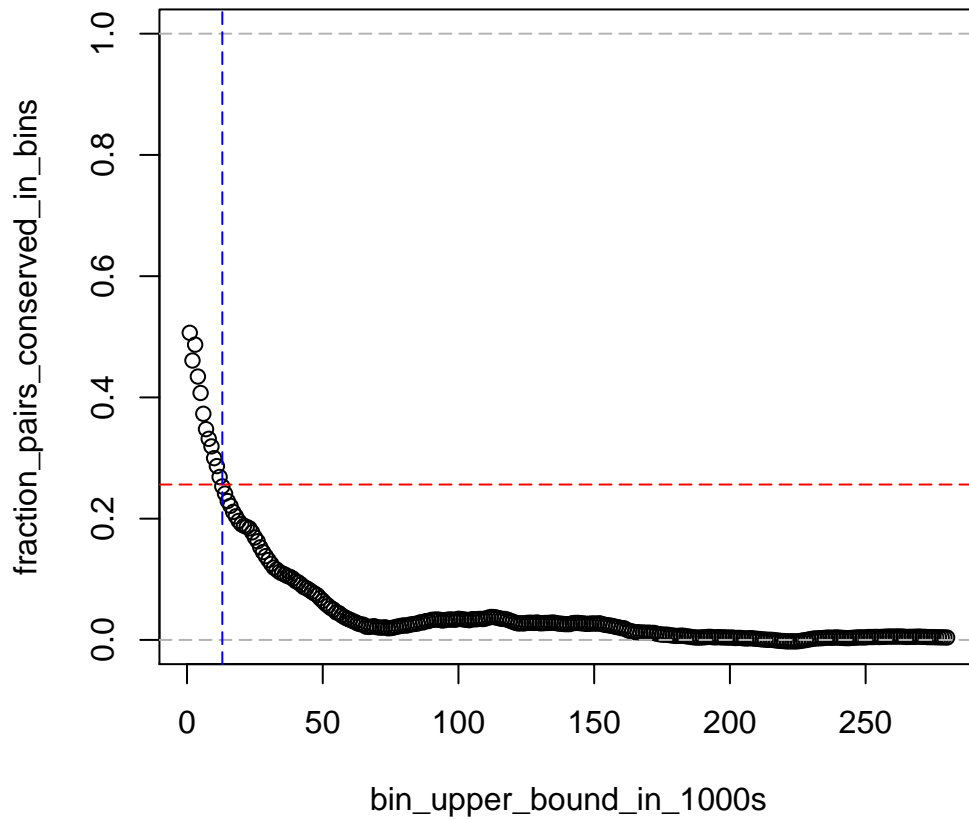

**Bin\_conservation\_minus\_bg\_MT325\_vs\_NE-JV-3**  
**PD-0.459612**

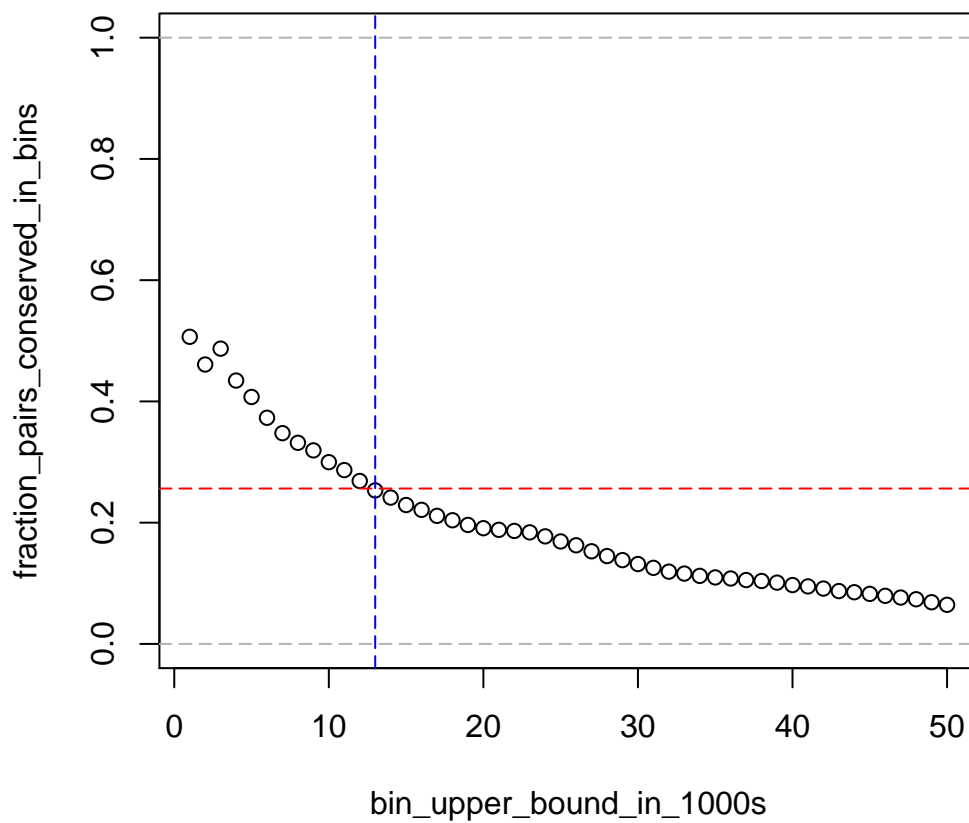

Supplement: s1 [file s1]

**Bin\_conservation\_minus\_bg\_MA-1E\_vs\_OR0704.2.2**  
**PD-0.651972**

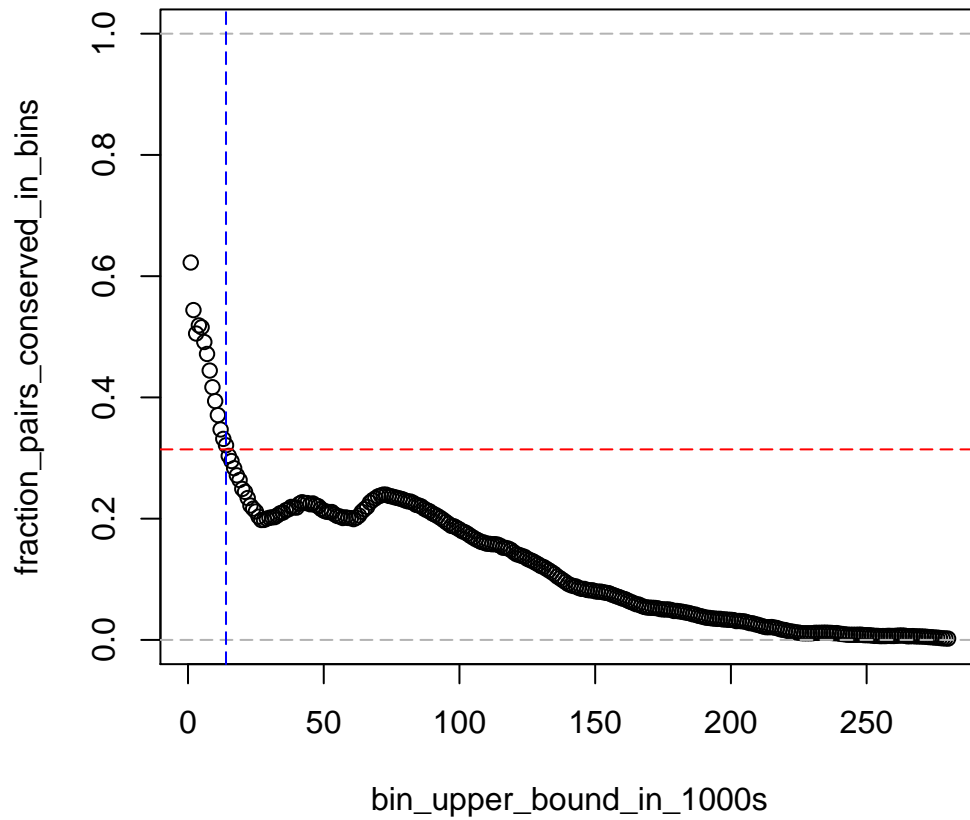

**Bin\_conservation\_minus\_bg\_MA-1E\_vs\_OR0704.2.2**  
**PD-0.651972**

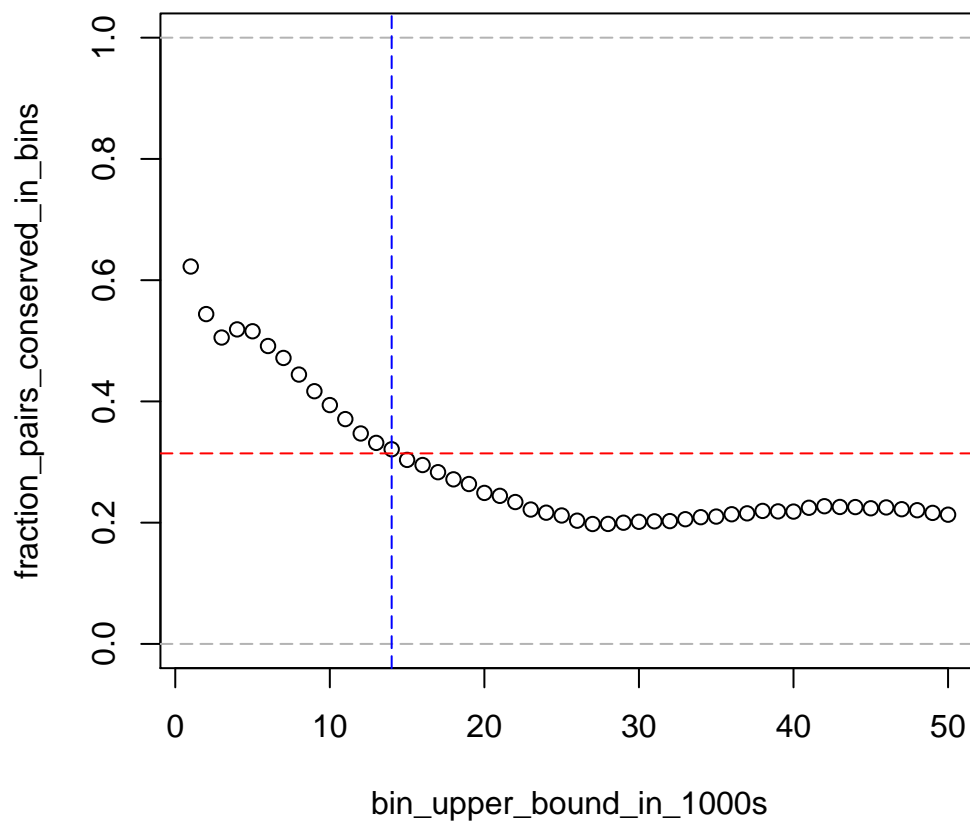

Supplement: s1 [file s1]

**Bin\_conservation\_minus\_bg\_NE-JV-1\_vs\_NE-JV-4**  
**PD-0.673452**

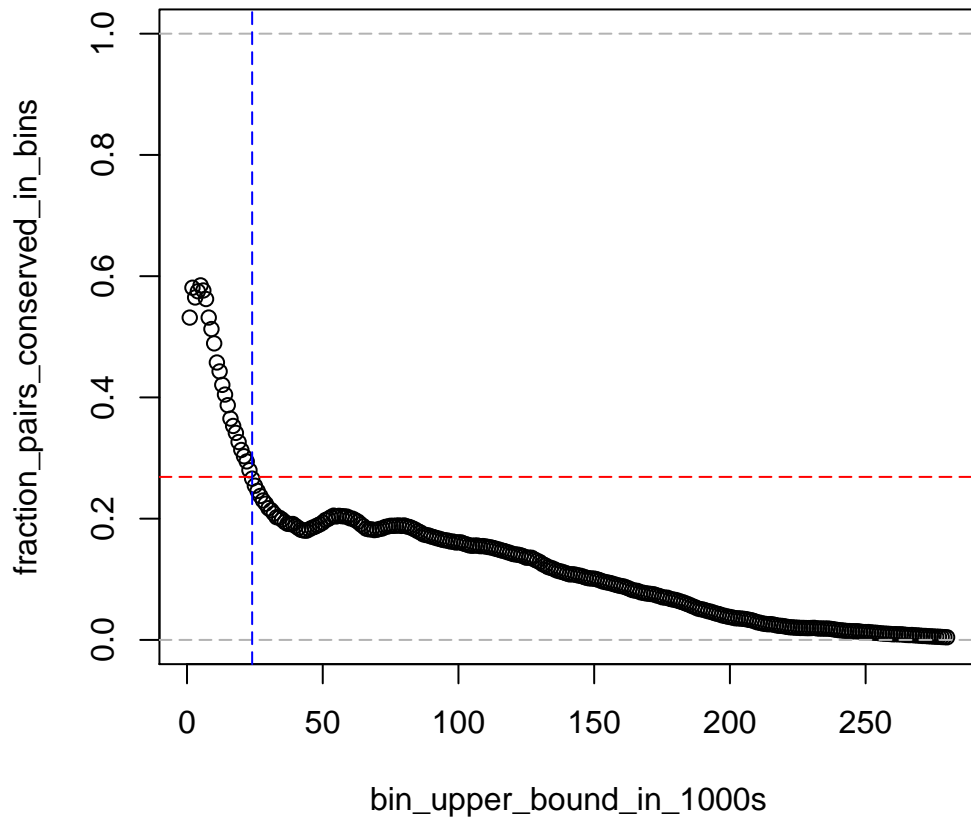

**Bin\_conservation\_minus\_bg\_NE-JV-1\_vs\_NE-JV-4**  
**PD-0.673452**

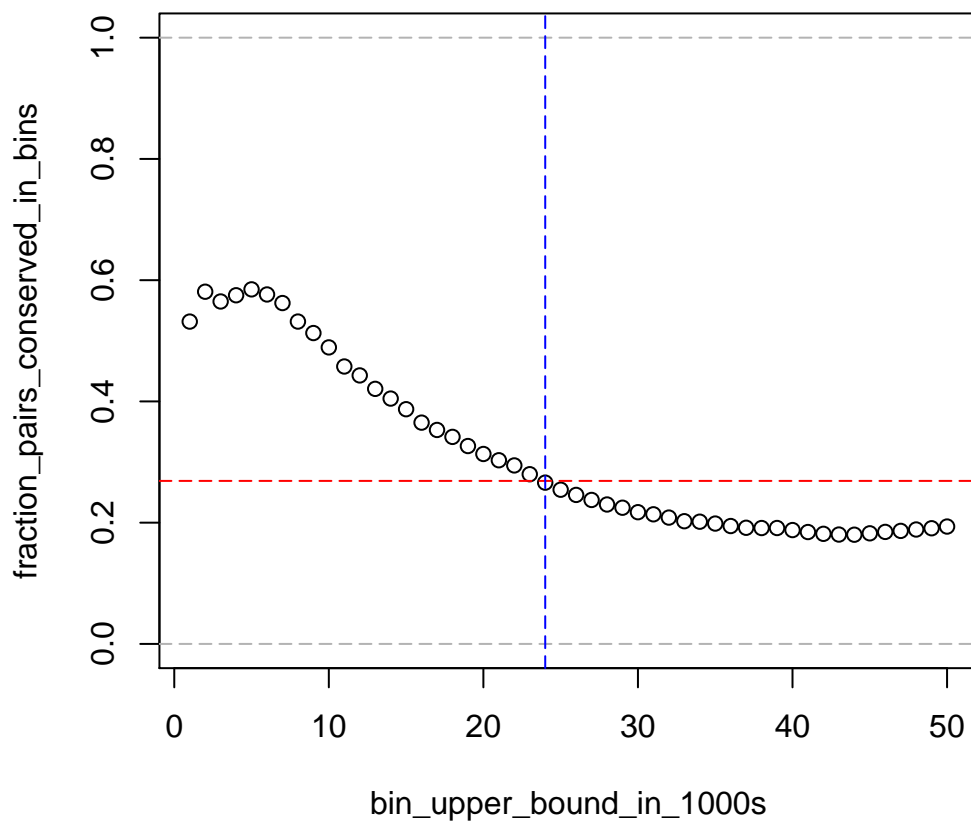

Supplement: s1 [file s1]

**Bin\_conservation\_minus\_bg\_CVA-1\_vs\_TN603.4.2**  
**PD-0.447265**

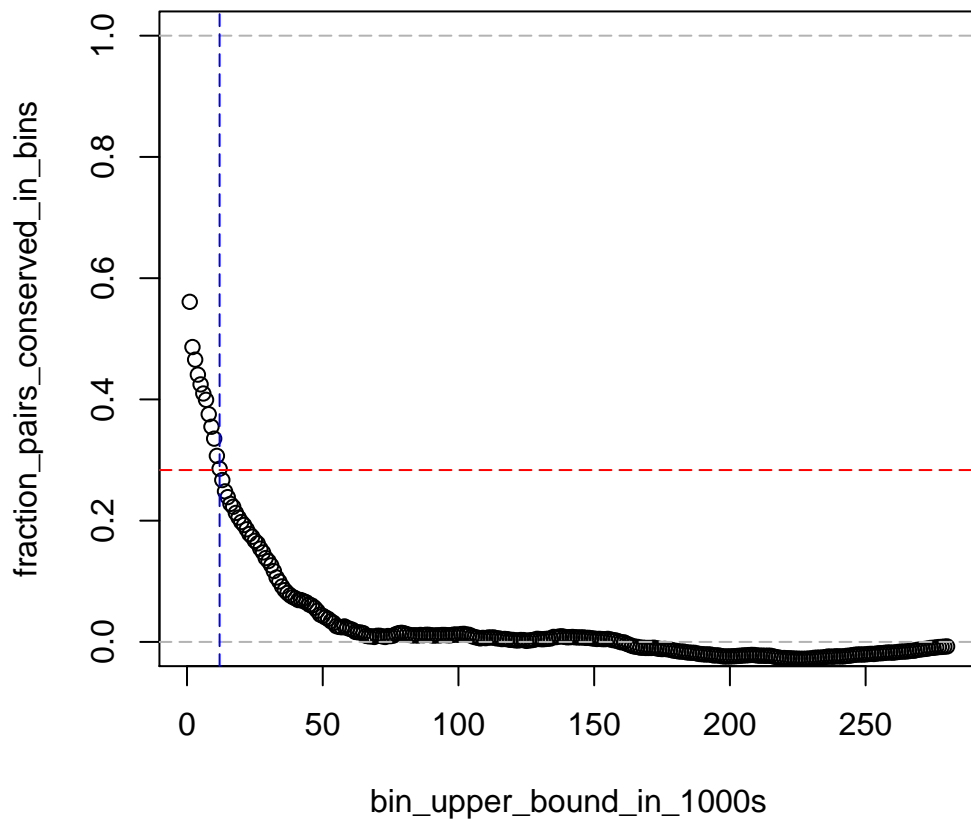

**Bin\_conservation\_minus\_bg\_CVA-1\_vs\_TN603.4.2**  
**PD-0.447265**

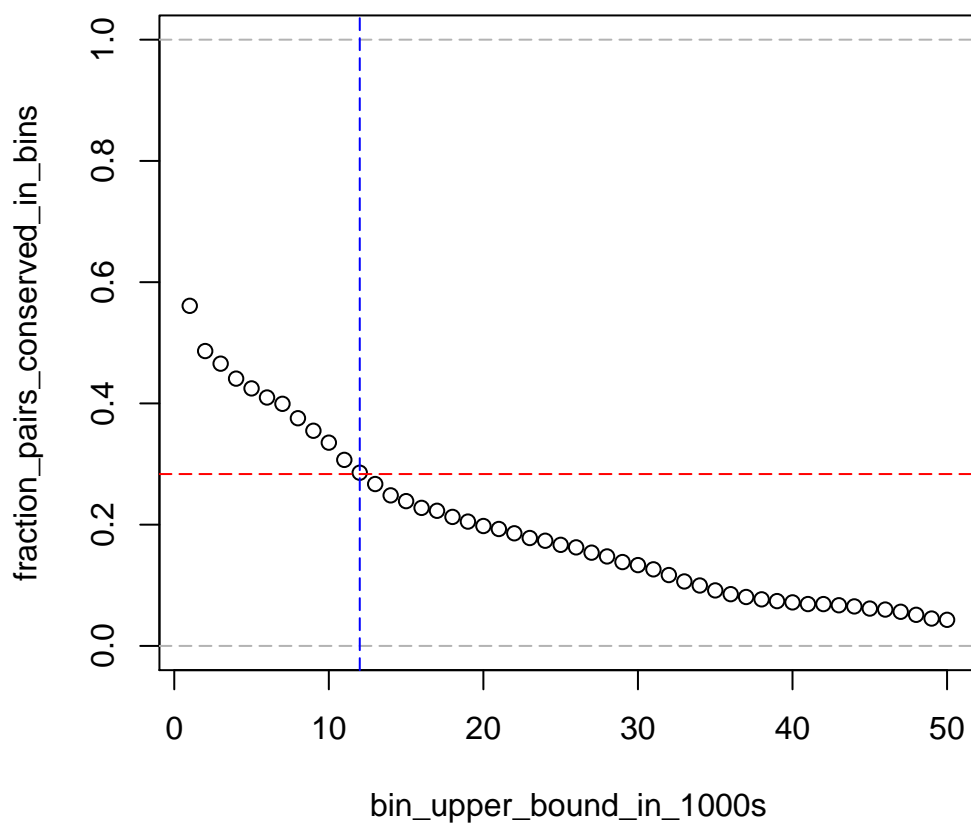

Supplement: s1 [file s1]

**Bin\_conservation\_minus\_bg\_Can18-4\_vs\_CVM-1**  
**PD-0.033069**

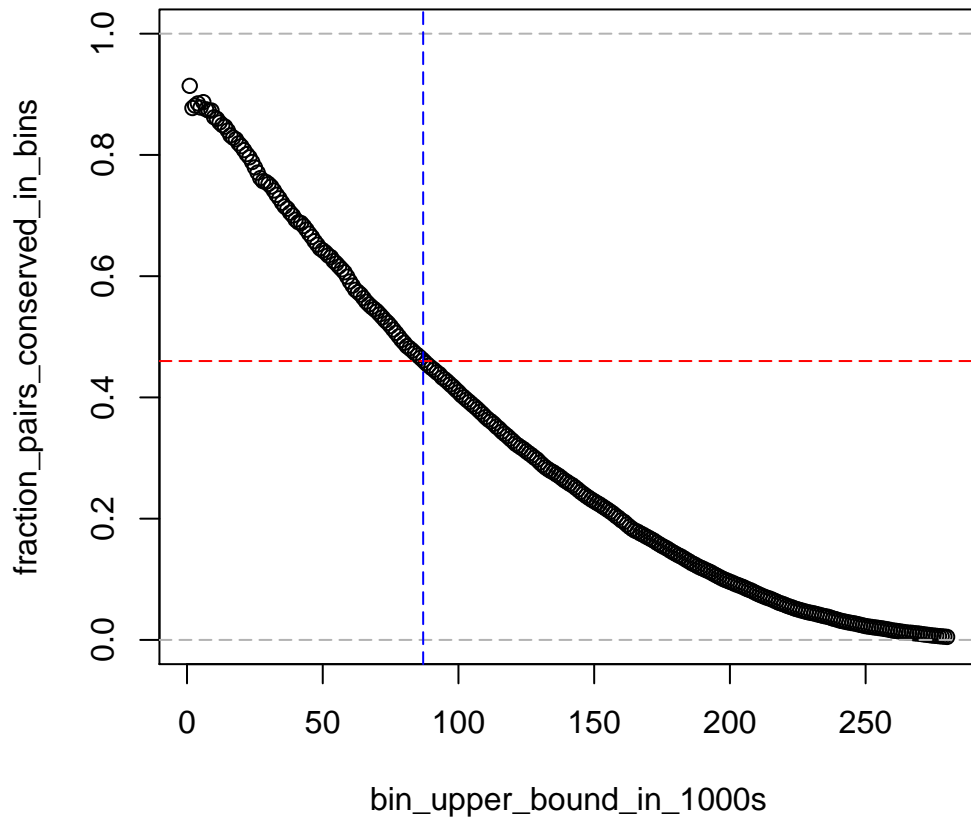

**Bin\_conservation\_minus\_bg\_Can18-4\_vs\_CVM-1**  
**PD-0.033069**

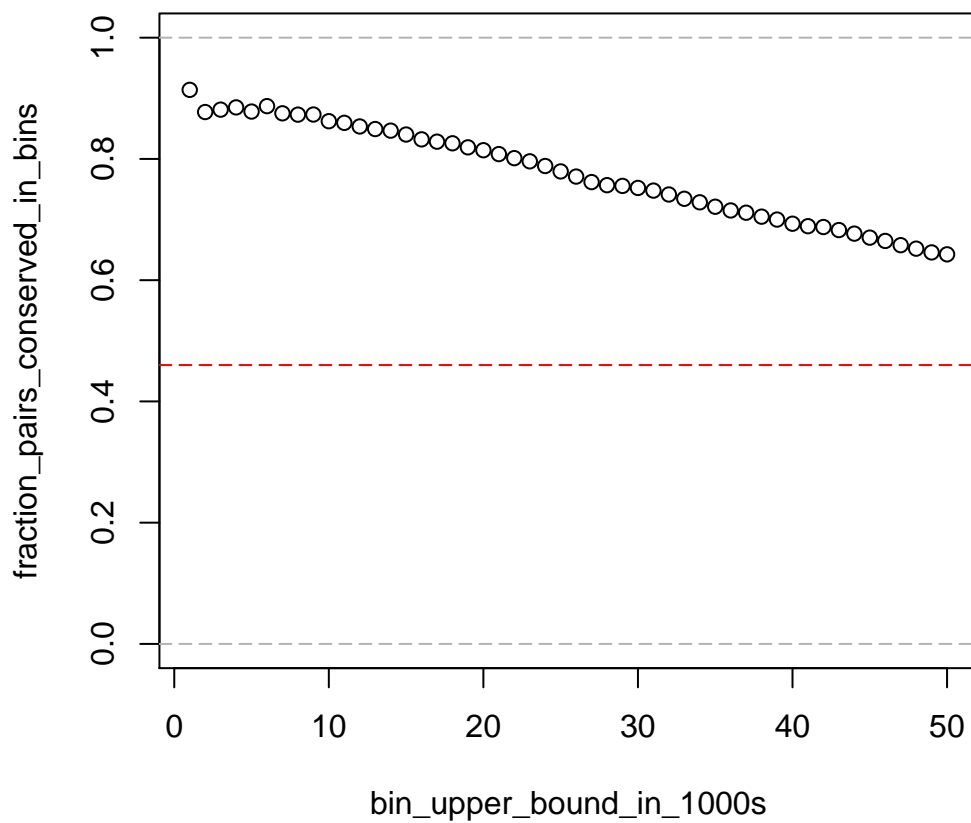

Supplement: s1 [file s1]

**Bin\_conservation\_minus\_bg\_AP110A\_vs\_CVR-1**  
**PD-0.009549**

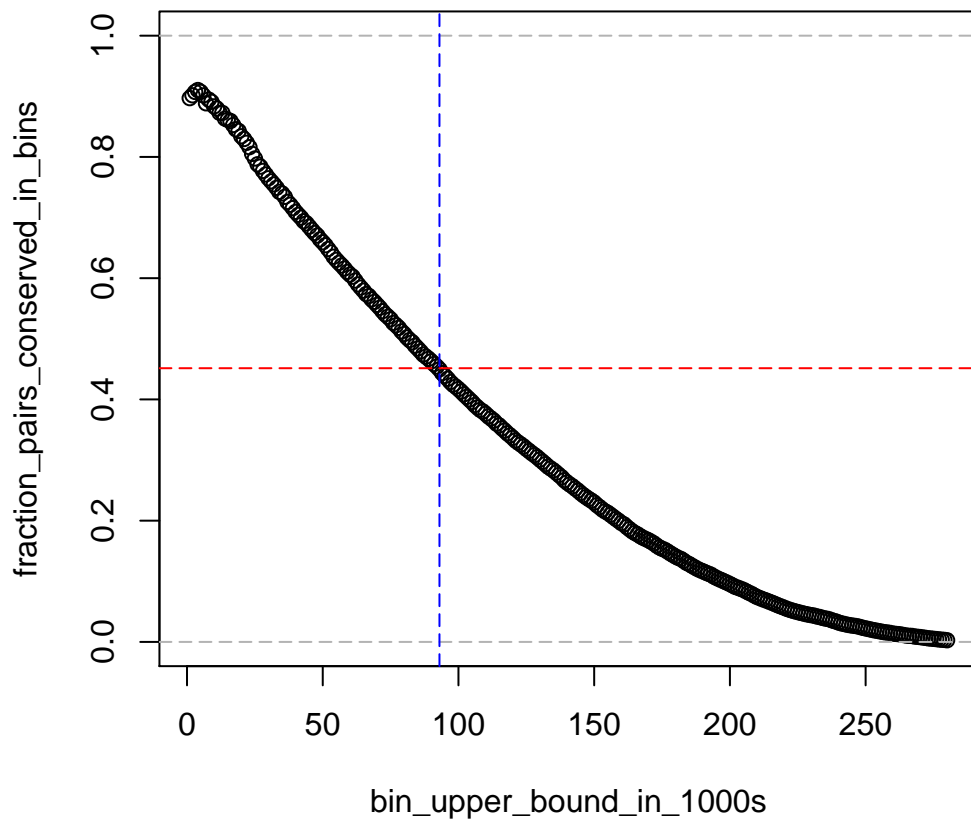

**Bin\_conservation\_minus\_bg\_AP110A\_vs\_CVR-1**  
**PD-0.009549**

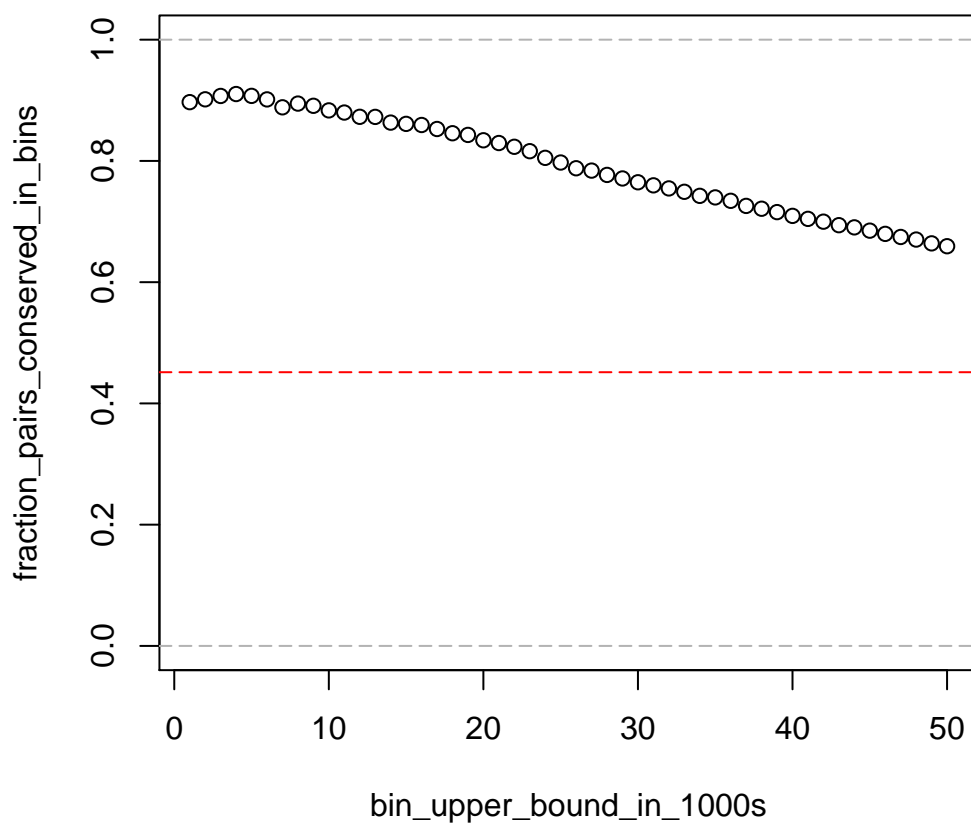

Supplement: s1 [file s1]

**Bin\_conservation\_minus\_bg\_IL-3A\_vs\_OR0704.3**  
**PD-0.68144**

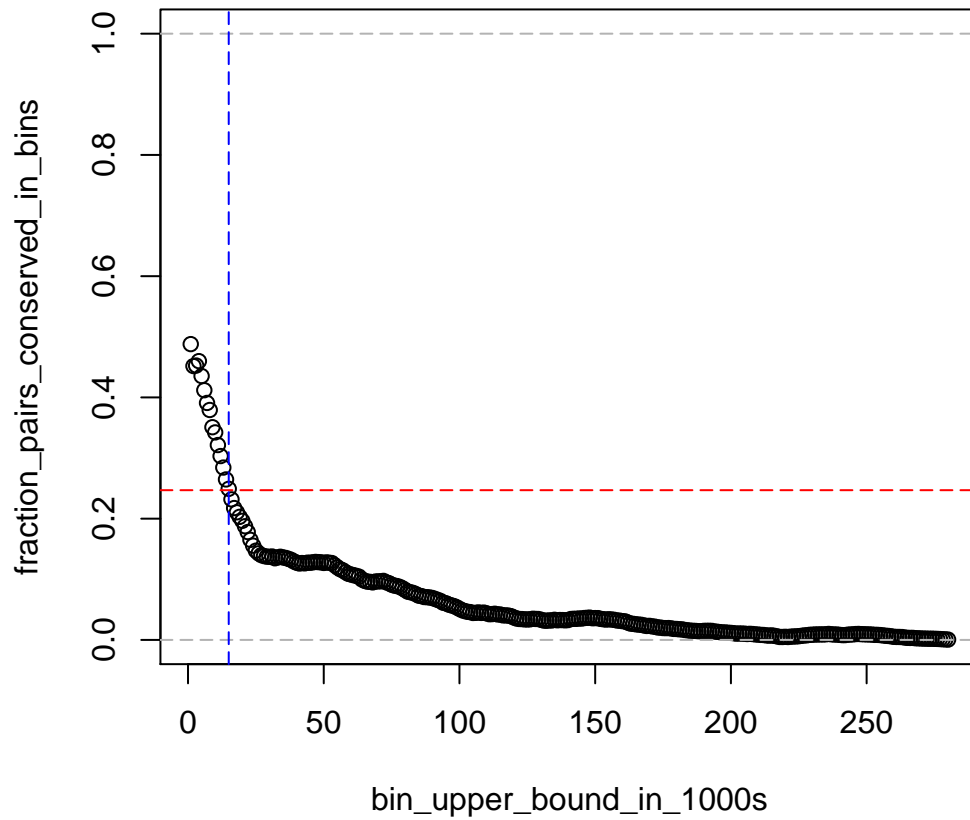

**Bin\_conservation\_minus\_bg\_IL-3A\_vs\_OR0704.3**  
**PD-0.68144**

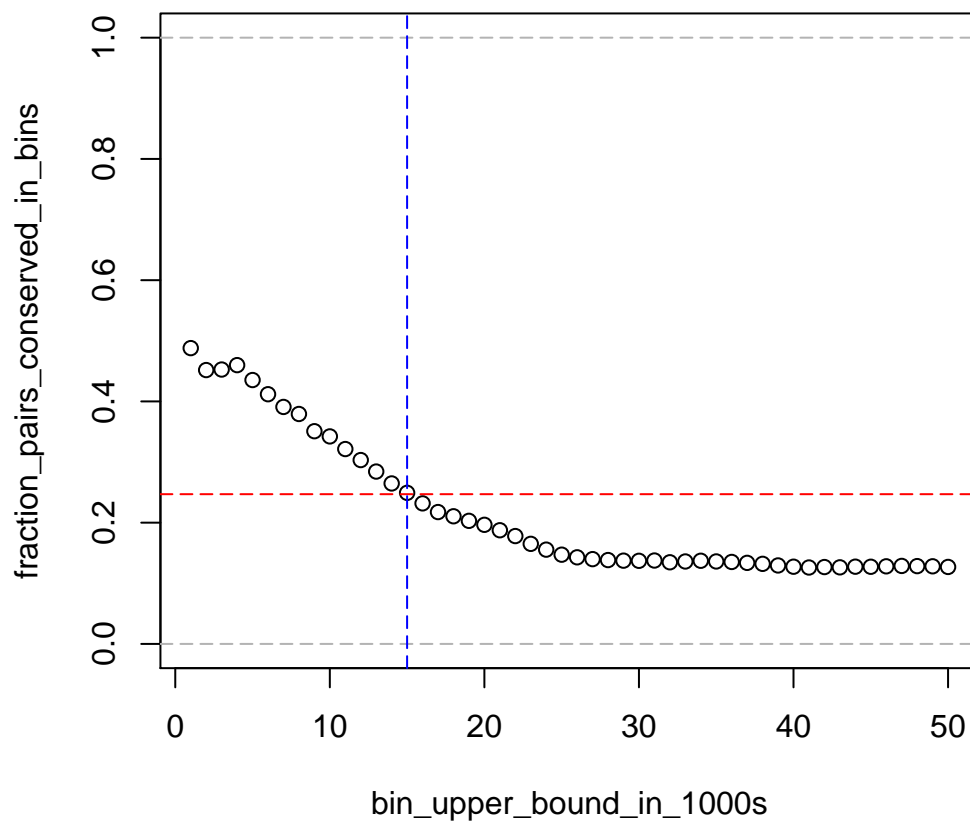

Supplement: s1 [file s1]

**Bin\_conservation\_minus\_bg\_CviKI\_vs\_PBCV1**  
**PD-0.030016**

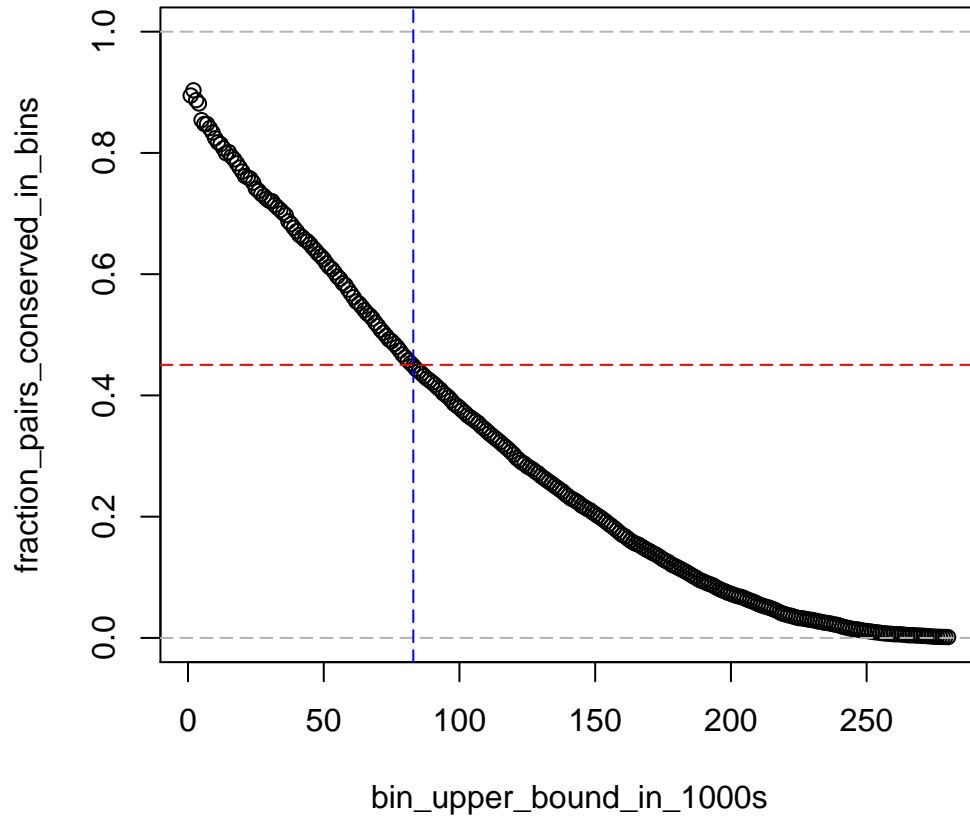

**Bin\_conservation\_minus\_bg\_CviKI\_vs\_PBCV1**  
**PD-0.030016**

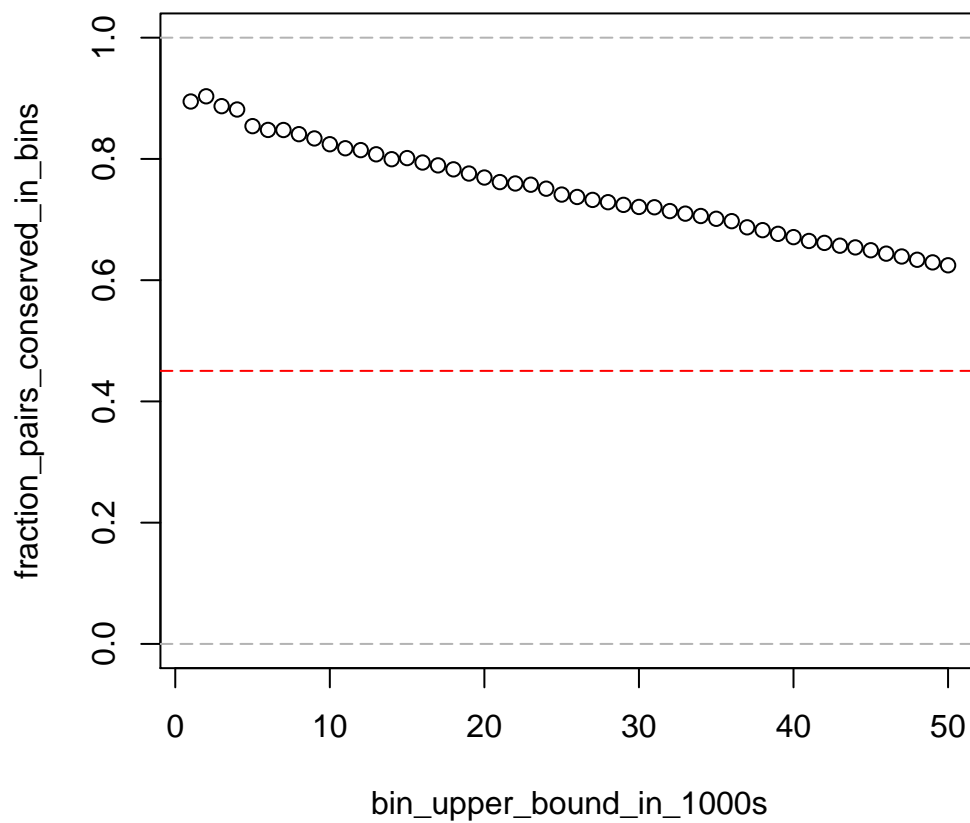

Supplement: s1 [file s1]

**Bin\_conservation\_minus\_bg\_AP110A\_vs\_AR158**  
**PD-0.665877**

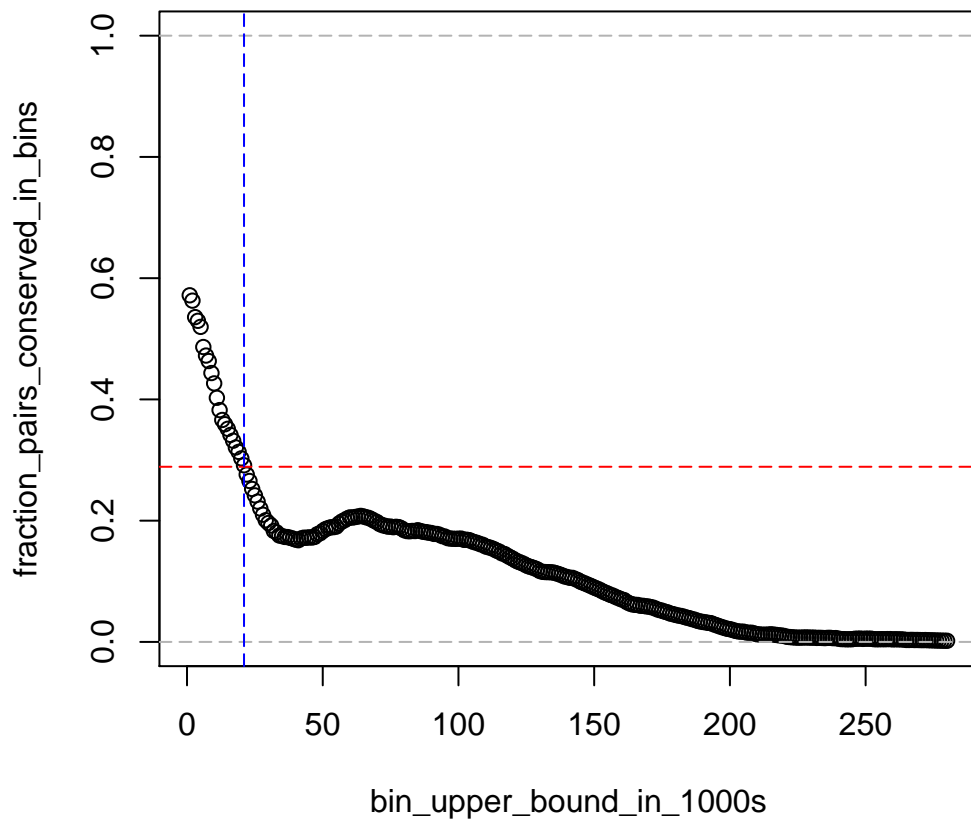

**Bin\_conservation\_minus\_bg\_AP110A\_vs\_AR158**  
**PD-0.665877**

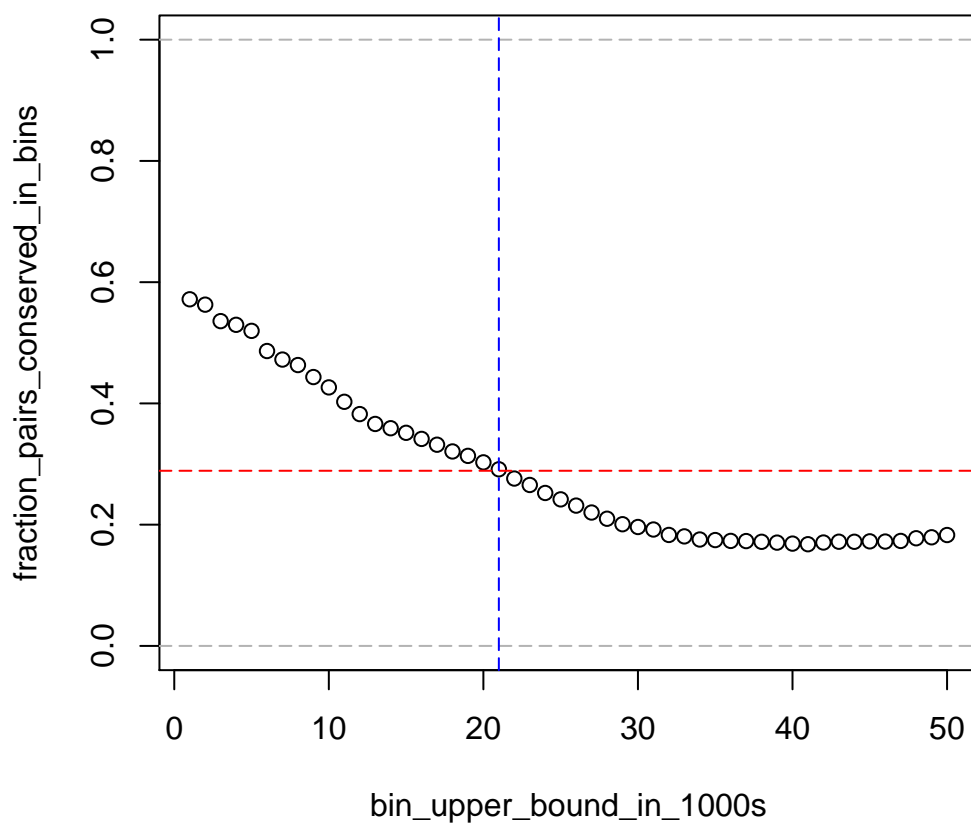

Supplement: s1 [file s1]

**Bin\_conservation\_minus\_bg\_Fr5L\_vs\_MA-1D**  
**PD-0.657965**

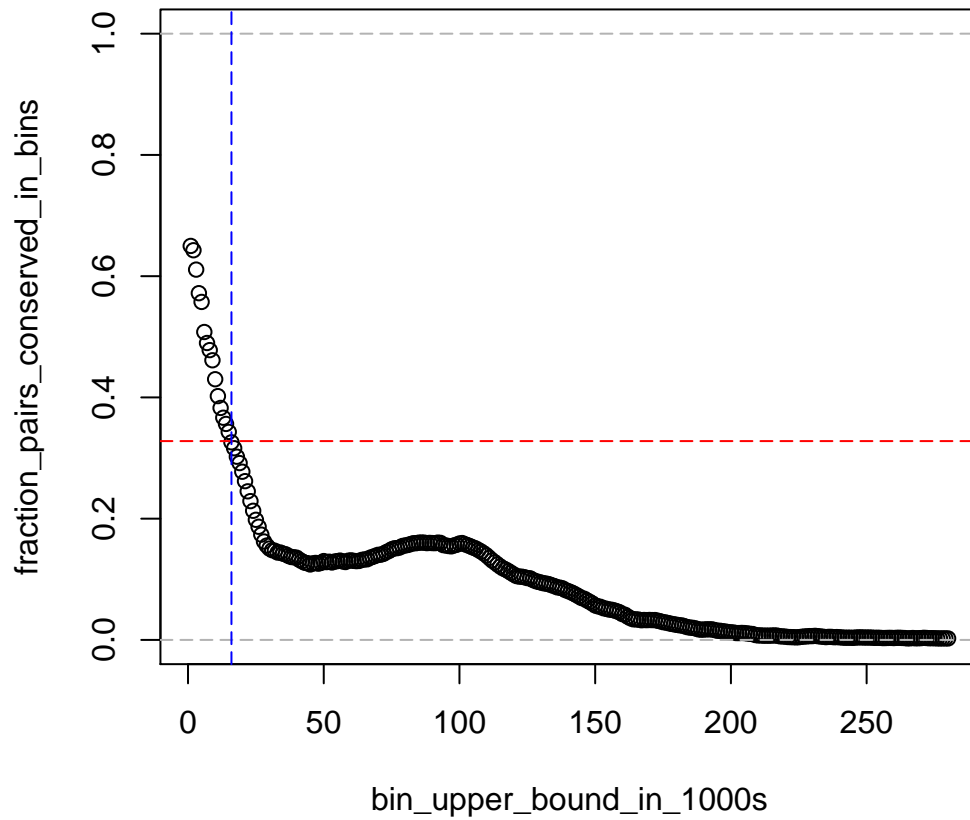

**Bin\_conservation\_minus\_bg\_Fr5L\_vs\_MA-1D**  
**PD-0.657965**

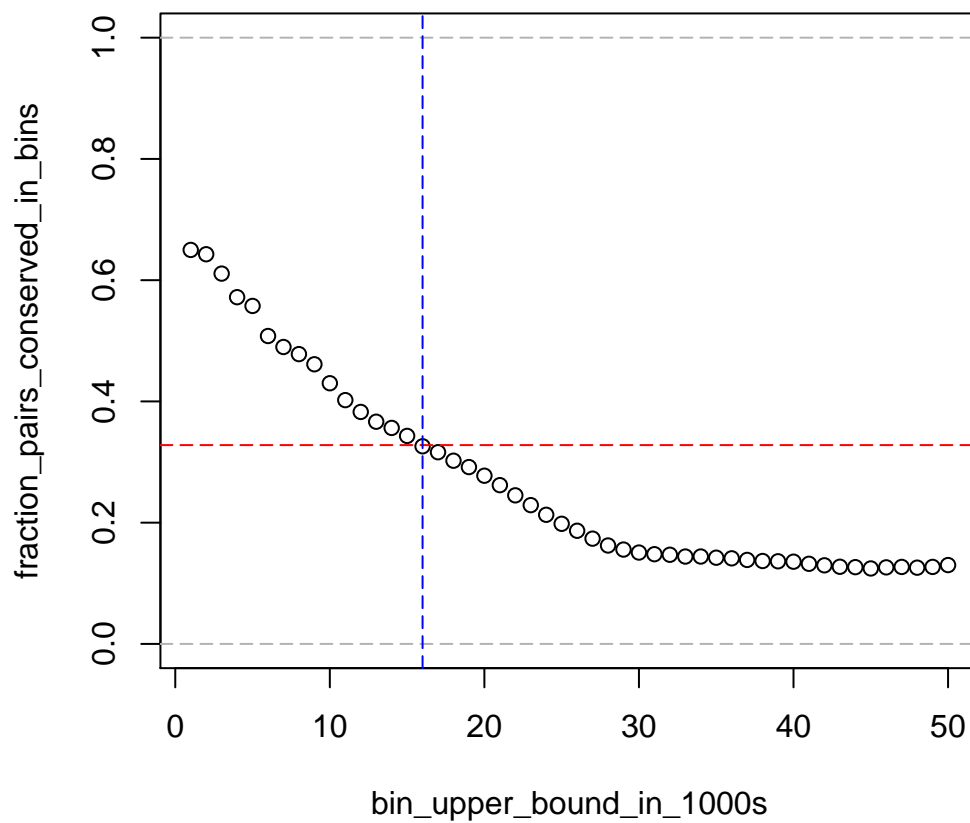

Supplement: s1 [file s1]

**Bin\_conservation\_minus\_bg\_CVM-1\_vs\_NY2A**  
**PD-0.667197**

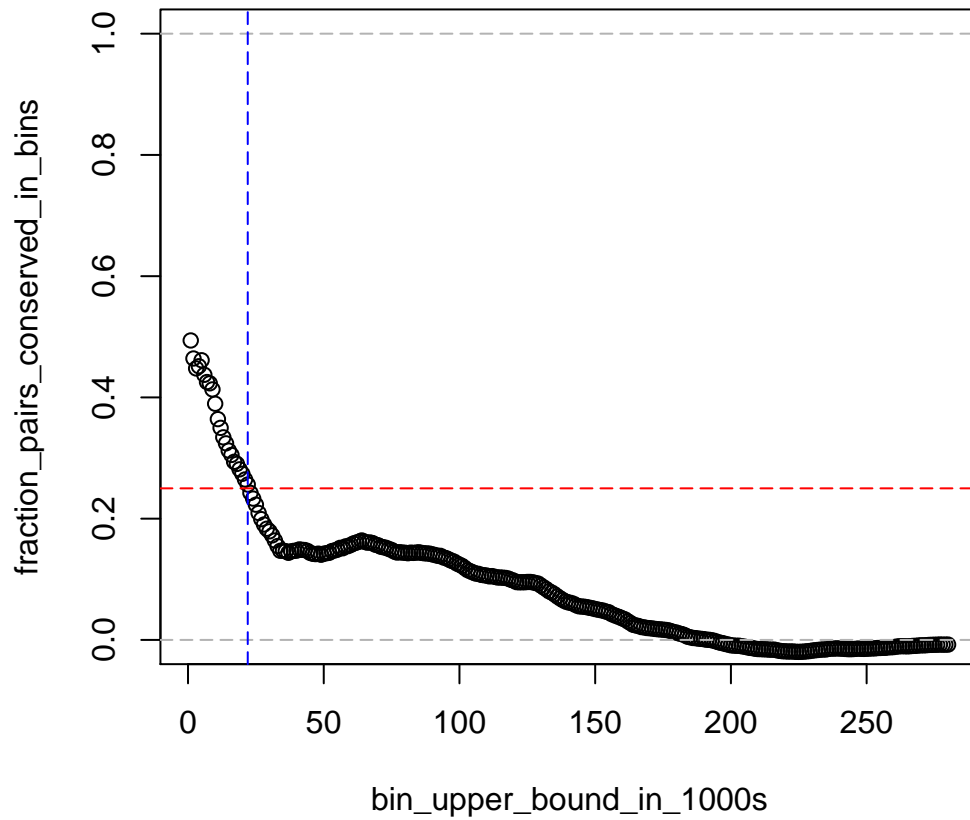

**Bin\_conservation\_minus\_bg\_CVM-1\_vs\_NY2A**  
**PD-0.667197**

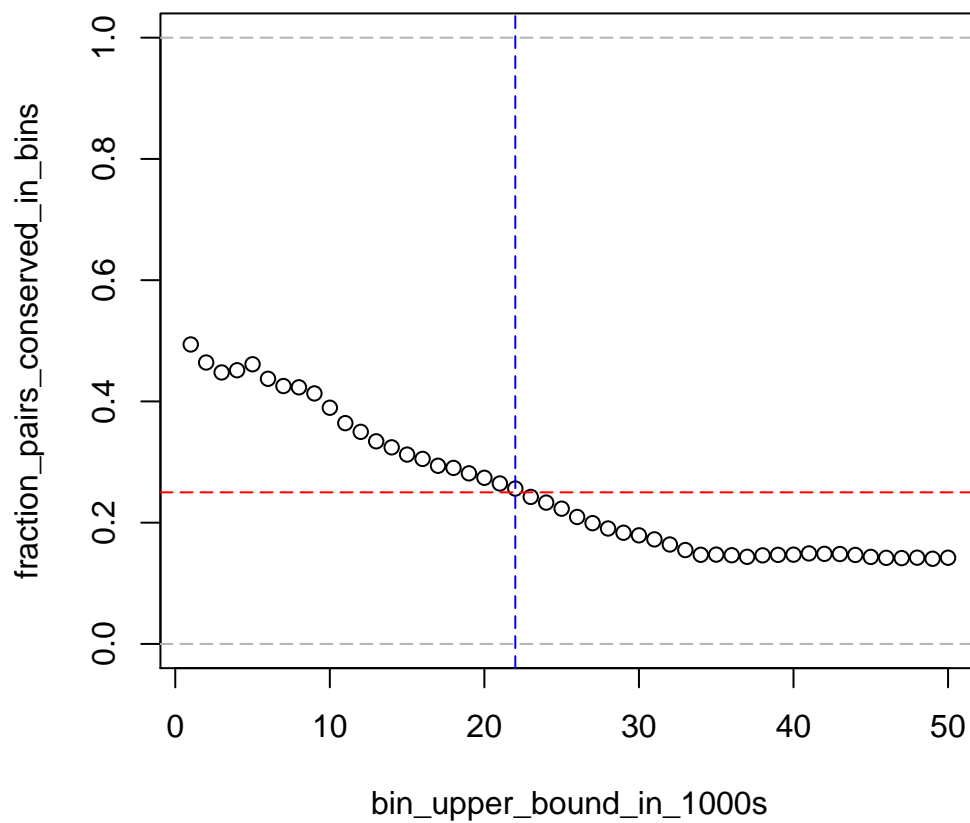

Supplement: s1 [file s1]

**Bin\_conservation\_minus\_bg\_ATCV1\_vs\_CviKI**  
**PD-0.692923**

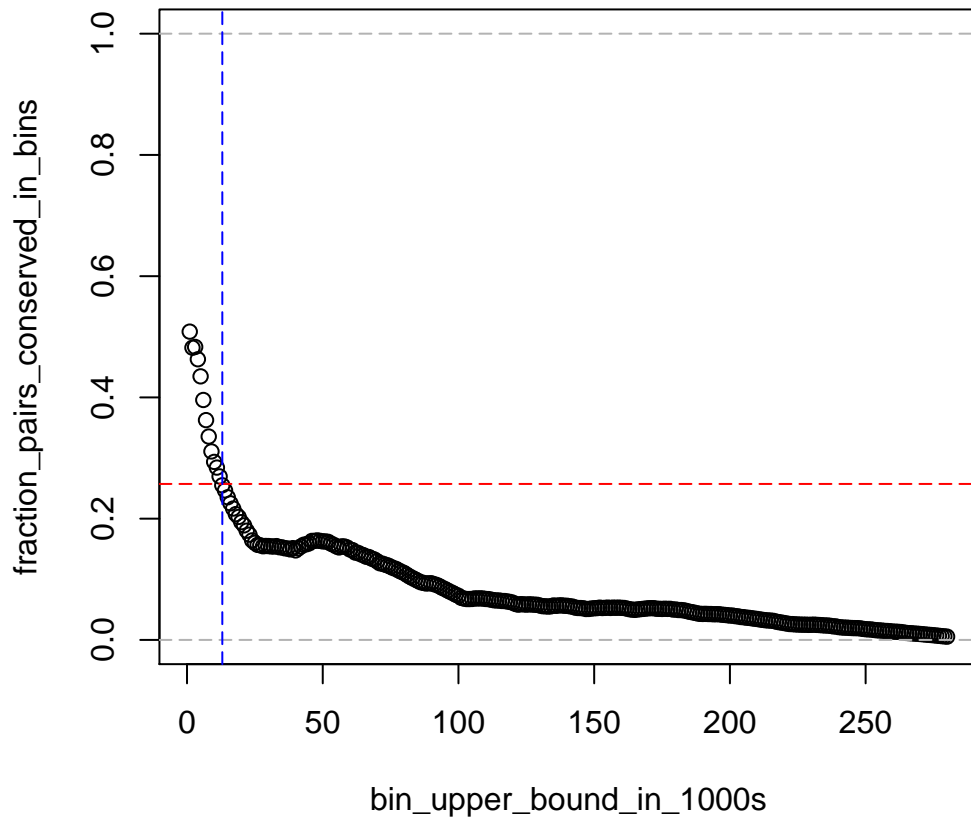

**Bin\_conservation\_minus\_bg\_ATCV1\_vs\_CviKI**  
**PD-0.692923**

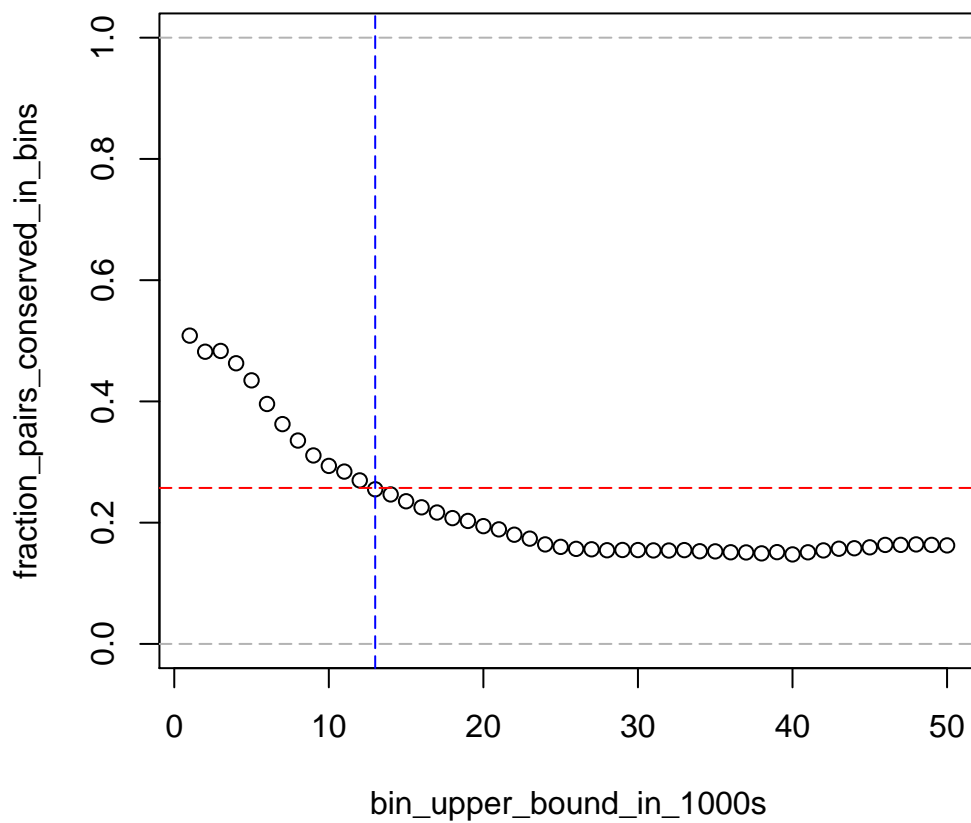

Supplement: s1 [file s1]

**Bin\_conservation\_minus\_bg\_GM0701.1\_vs\_KS1B**  
**PD-0.683099**

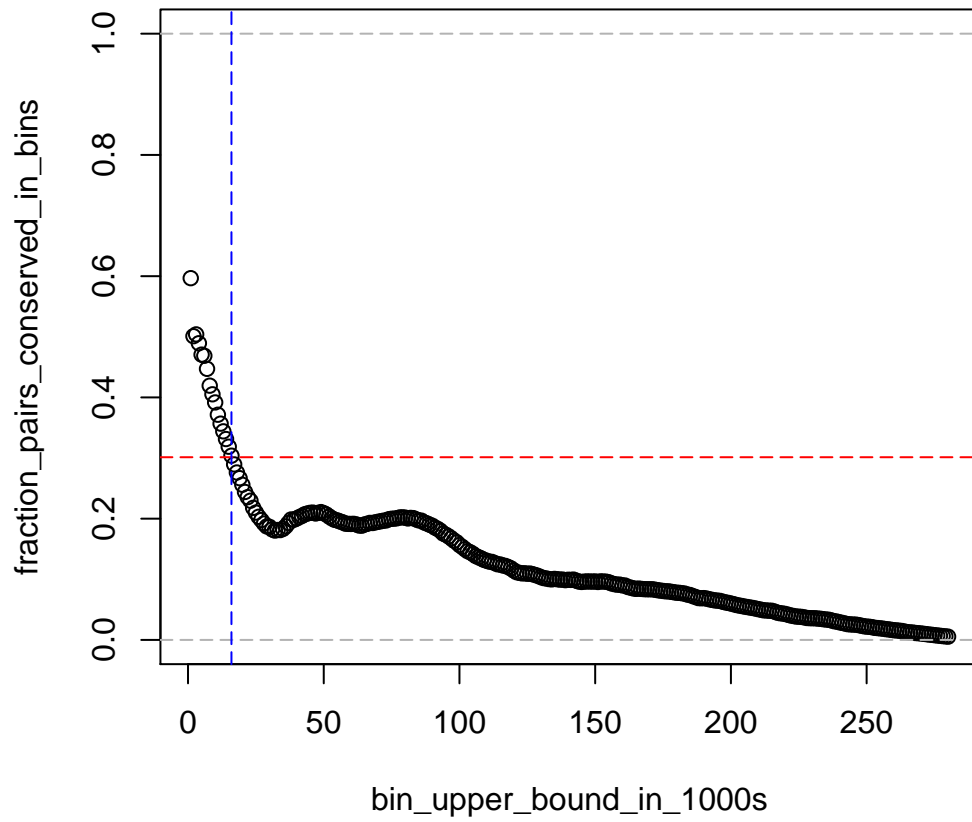

**Bin\_conservation\_minus\_bg\_GM0701.1\_vs\_KS1B**  
**PD-0.683099**

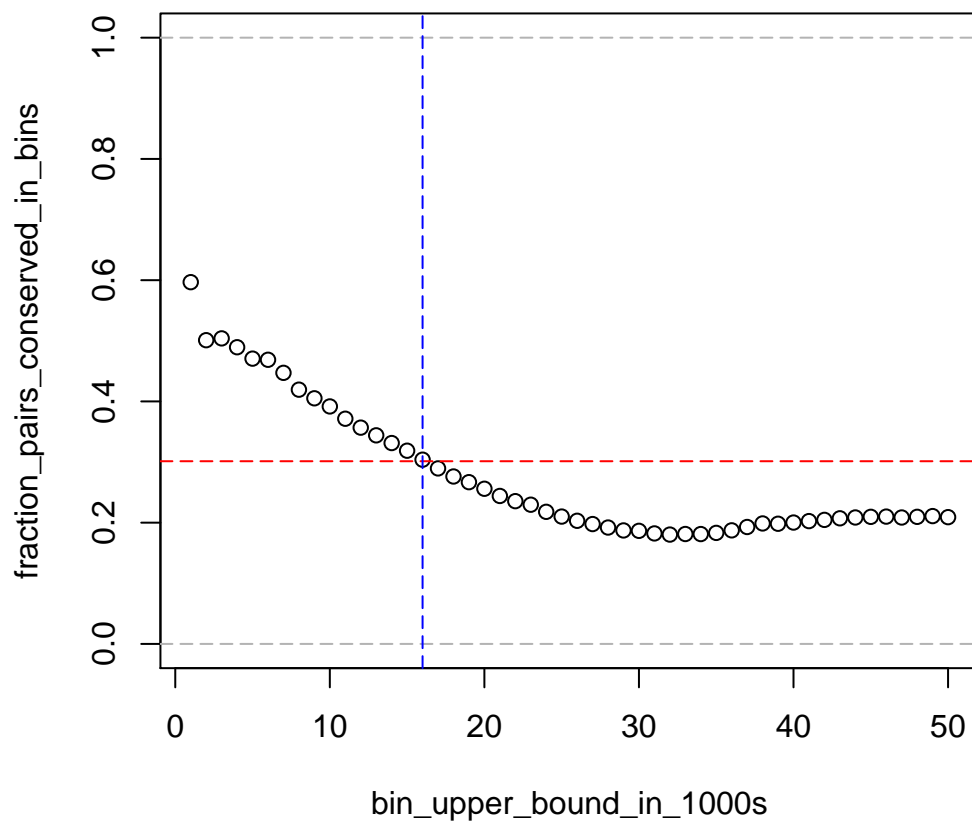

Supplement: s1 [file s1]

**Bin\_conservation\_minus\_bg\_CviKI\_vs\_NE-JV-4**  
**PD-0.013579**

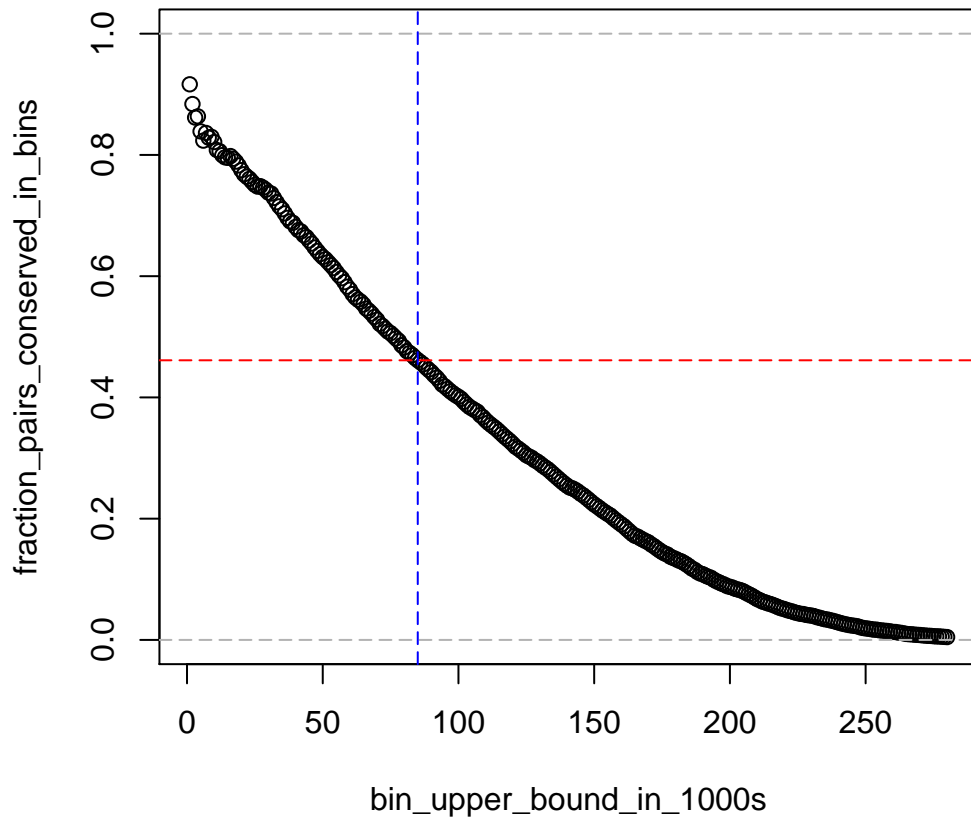

**Bin\_conservation\_minus\_bg\_CviKI\_vs\_NE-JV-4**  
**PD-0.013579**

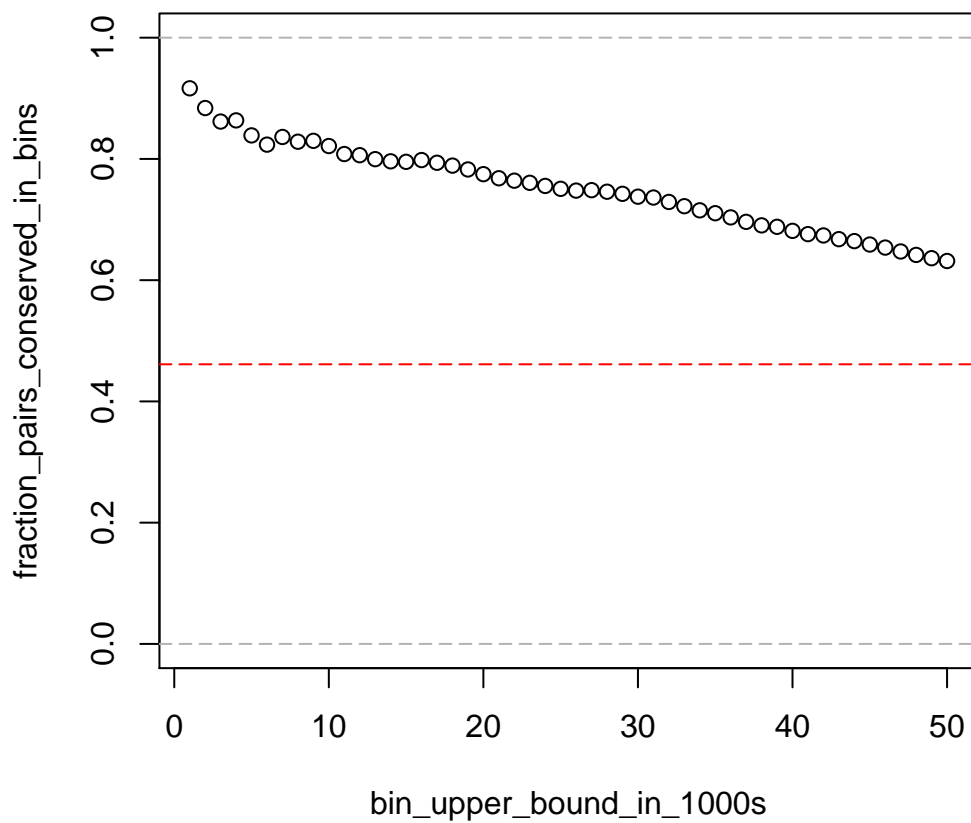

Supplement: s1 [file s1]

**Bin\_conservation\_minus\_bg\_AP110A\_vs\_OR0704.3**  
**PD-0.462812**

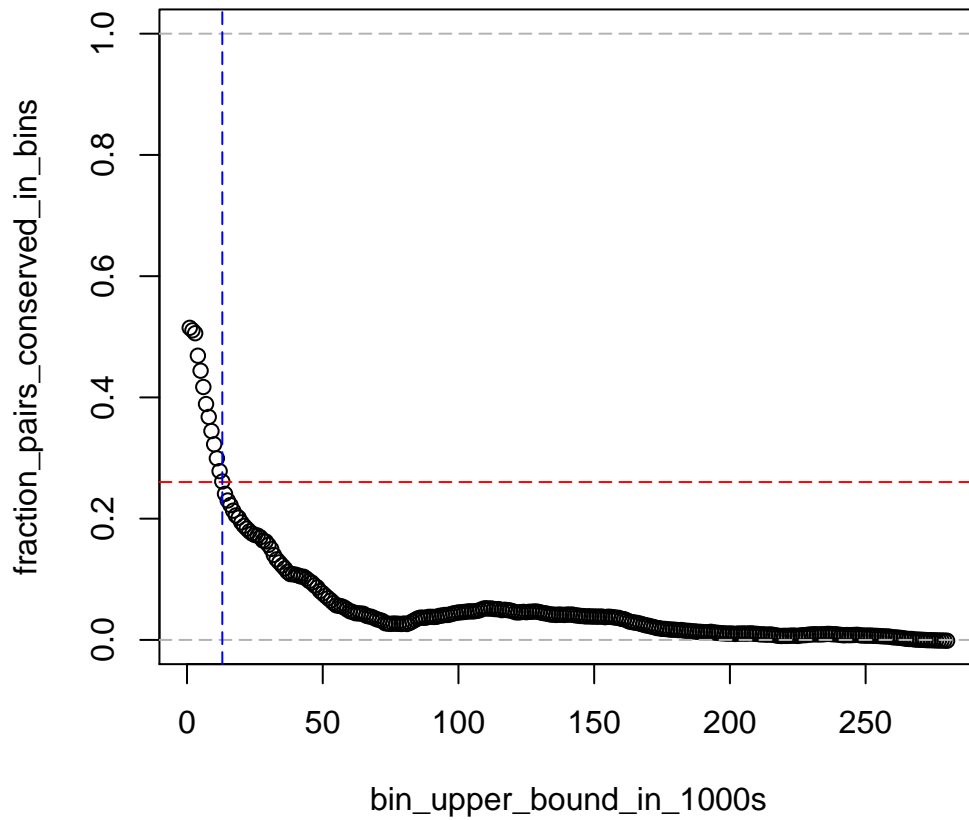

**Bin\_conservation\_minus\_bg\_AP110A\_vs\_OR0704.3**  
**PD-0.462812**

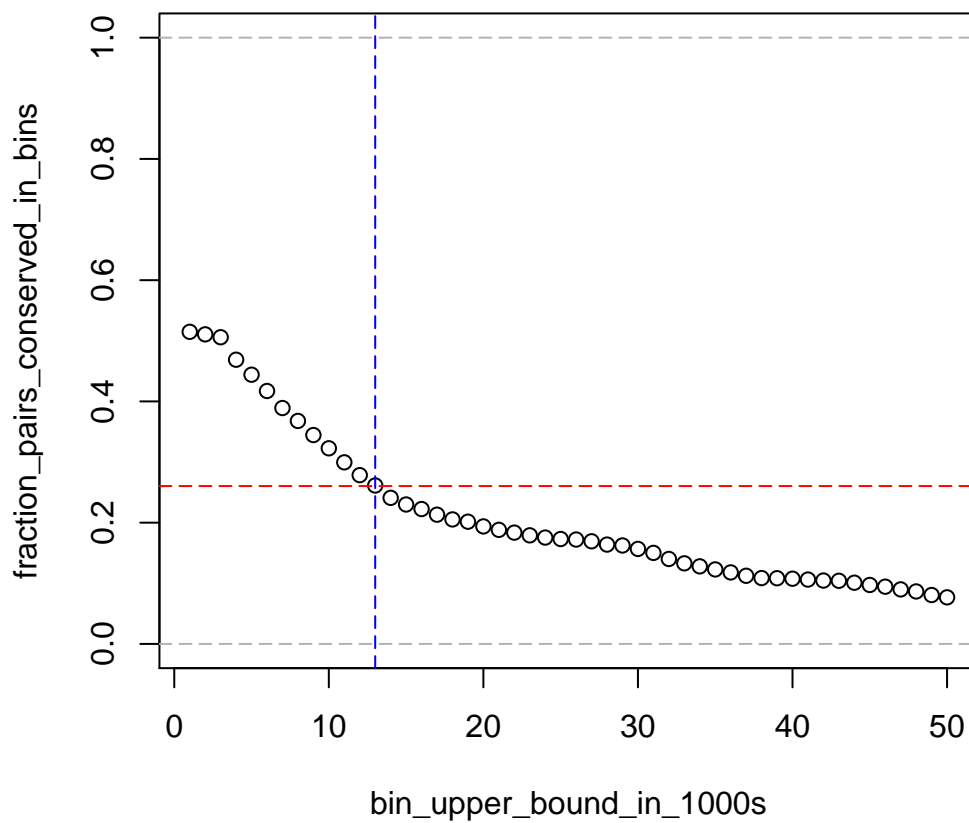

Supplement: s1 [file s1]

**Bin\_conservation\_minus\_bg\_CvsA1\_vs\_OR0704.3**  
**PD-0.69488**

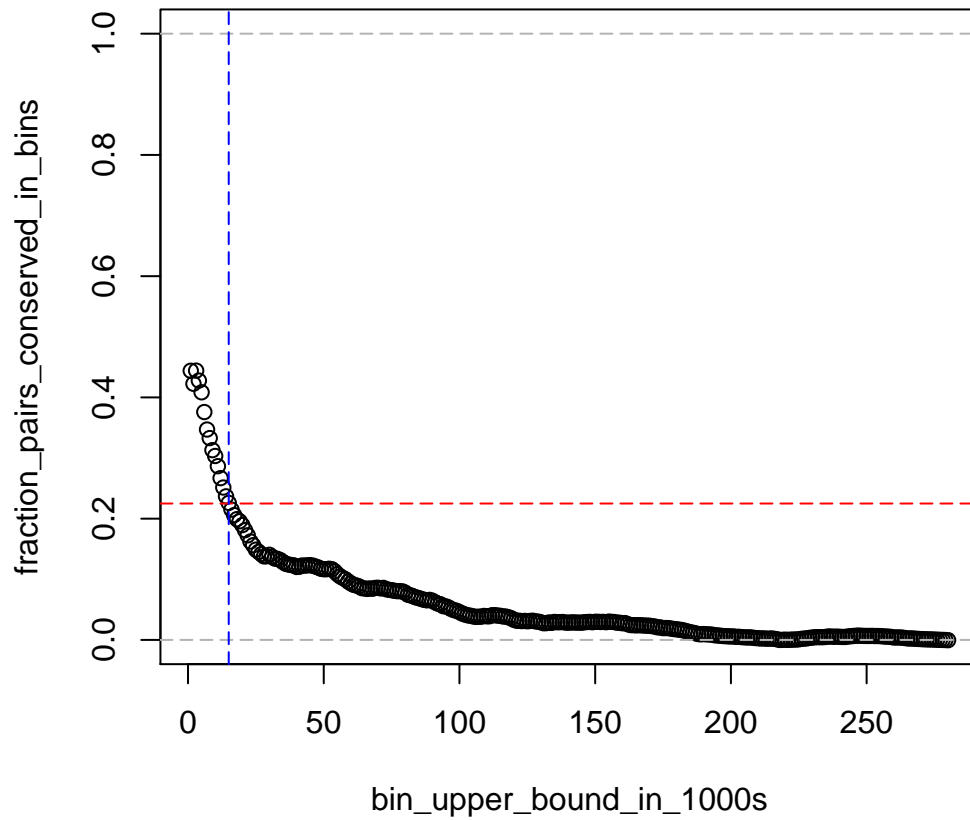

**Bin\_conservation\_minus\_bg\_CvsA1\_vs\_OR0704.3**  
**PD-0.69488**

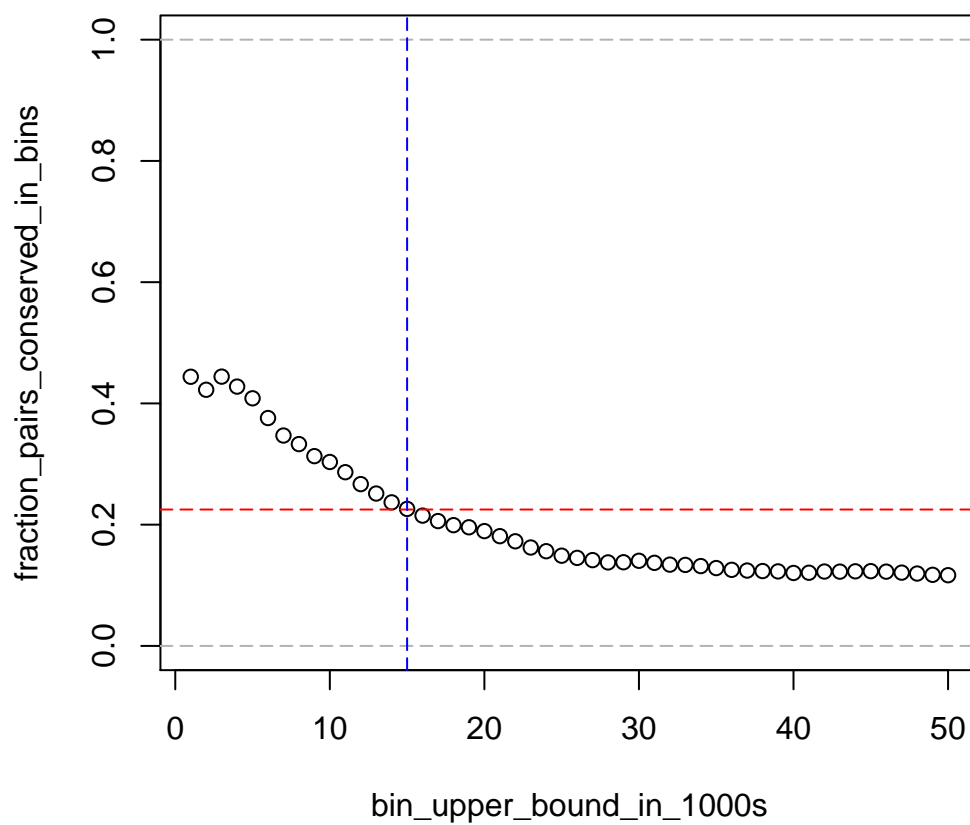

Supplement: s1 [file s1]

**Bin\_conservation\_minus\_bg\_NTS-1\_vs\_PBCV1**  
**PD-0.671722**

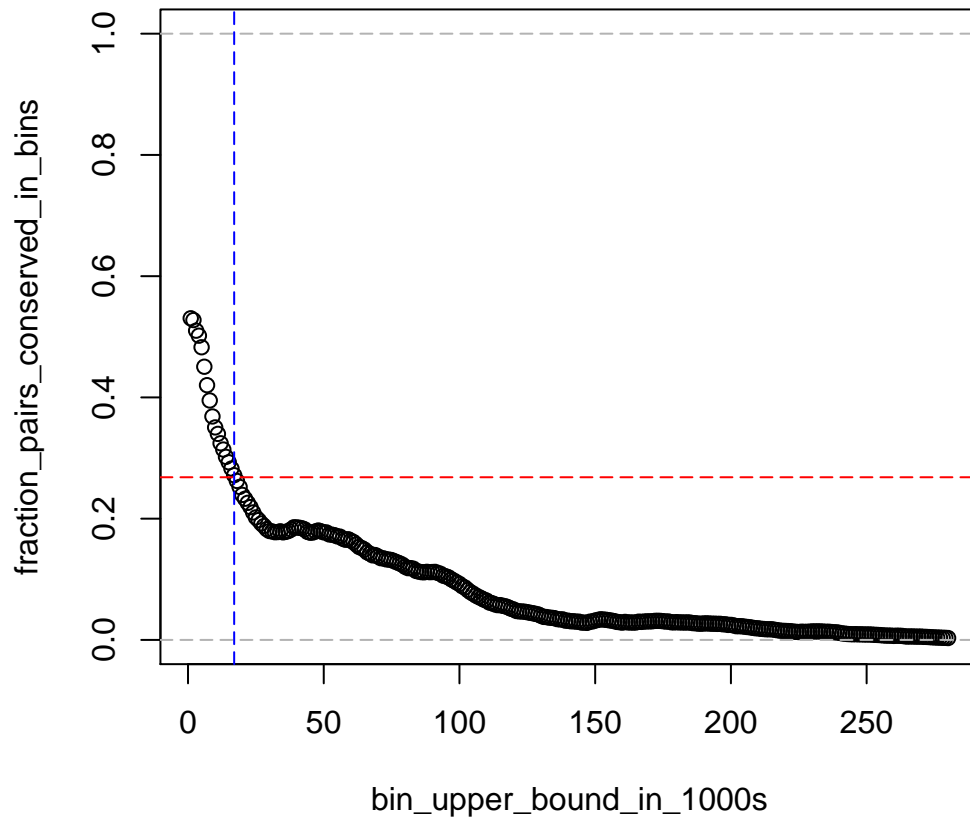

**Bin\_conservation\_minus\_bg\_NTS-1\_vs\_PBCV1**  
**PD-0.671722**

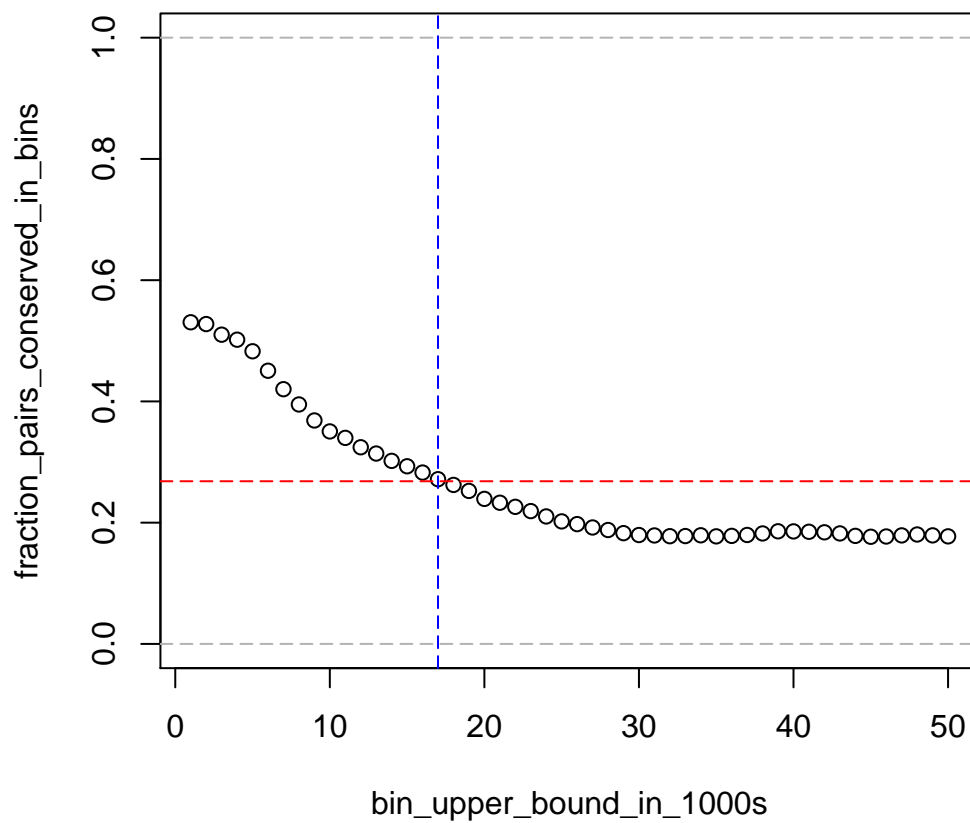

Supplement: s1 [file s1]

**Bin\_conservation\_minus\_bg\_AP110A\_vs\_NY-2B**  
**PD-0.665823**

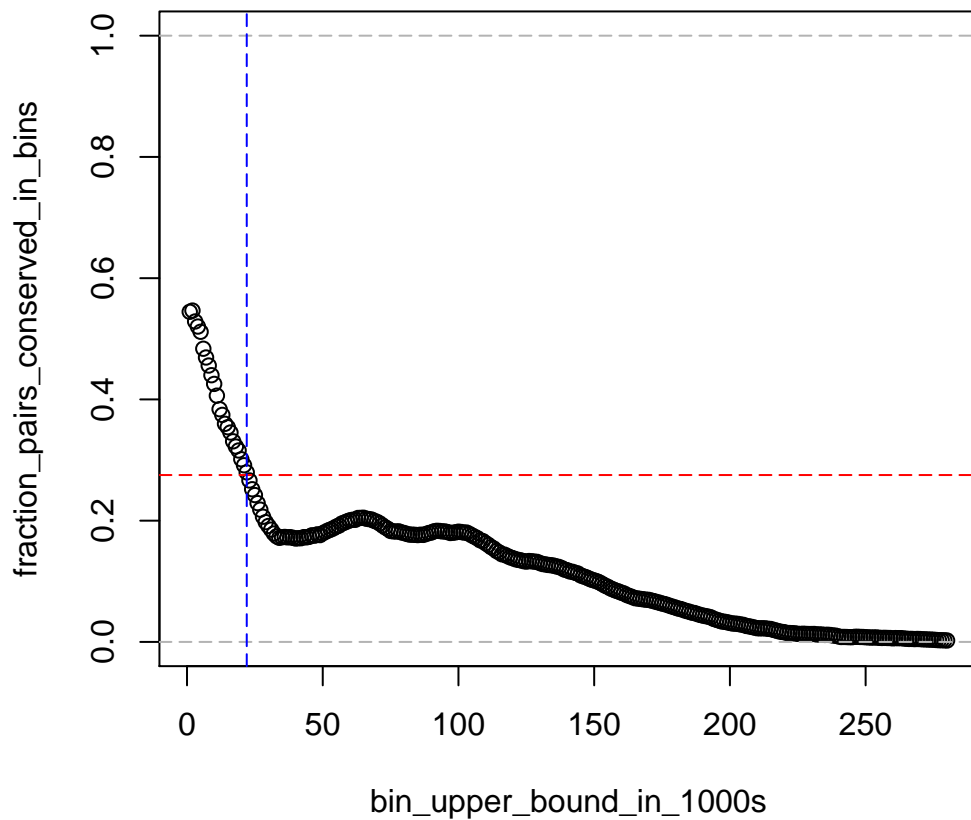

**Bin\_conservation\_minus\_bg\_AP110A\_vs\_NY-2B**  
**PD-0.665823**

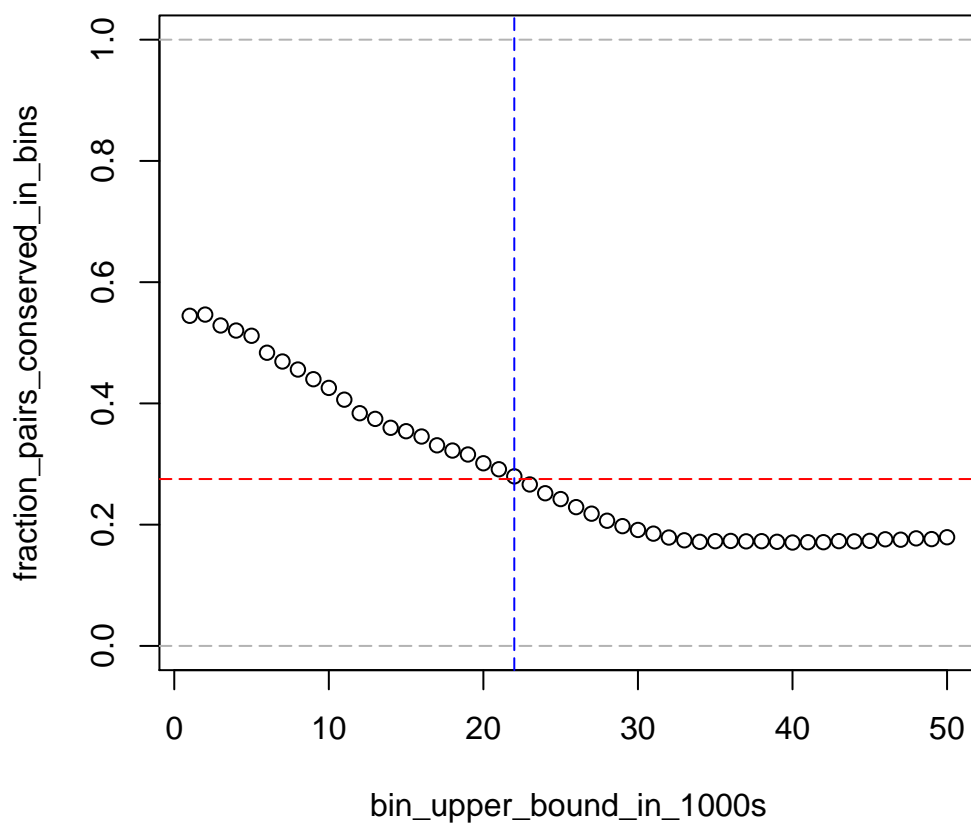

Supplement: s1 [file s1]

**Bin\_conservation\_minus\_bg\_KS1B\_vs\_NE-JV-1**  
**PD-0.685178**

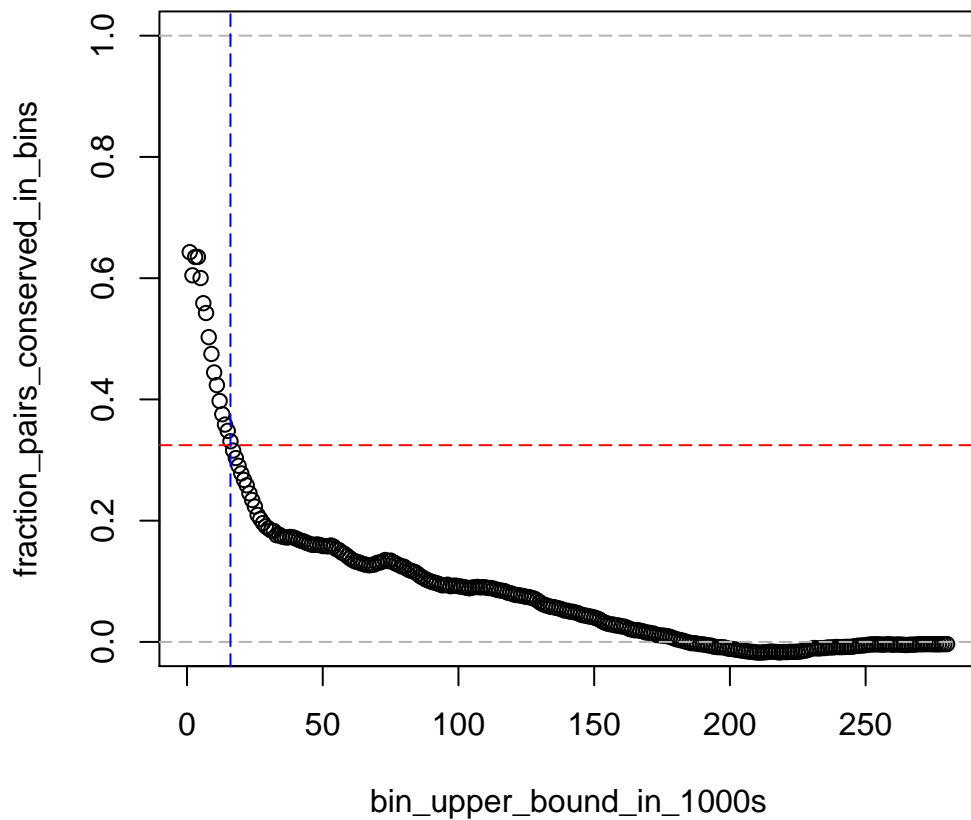

**Bin\_conservation\_minus\_bg\_KS1B\_vs\_NE-JV-1**  
**PD-0.685178**

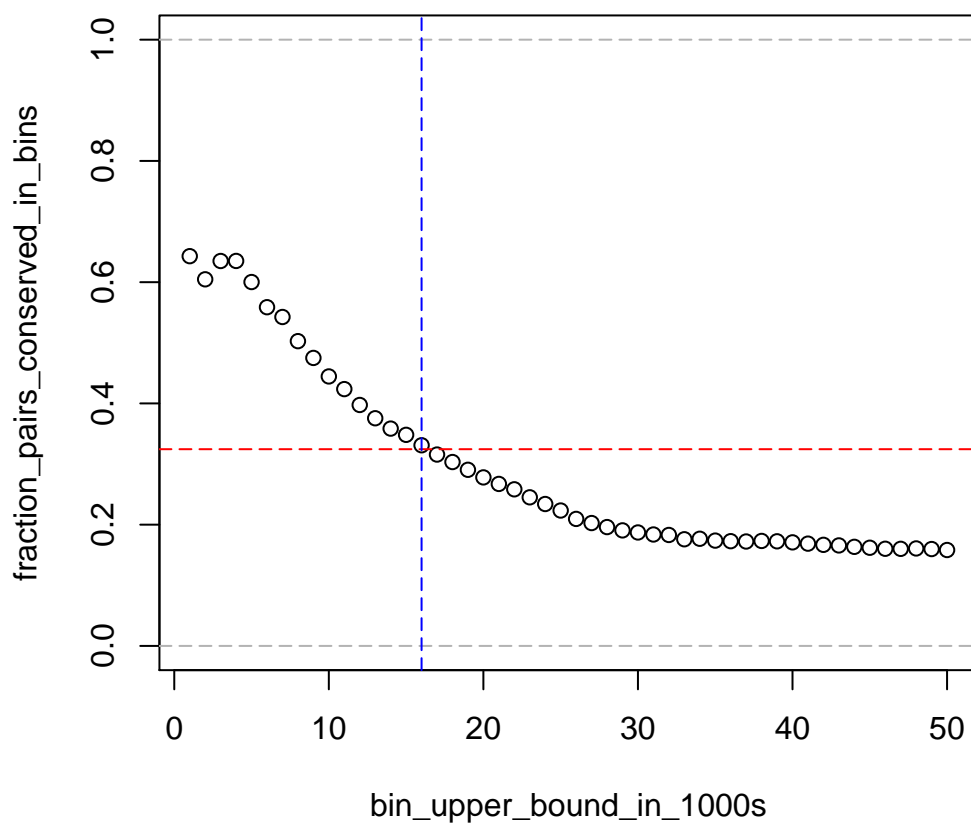

Supplement: s1 [file s1]

**Bin\_conservation\_minus\_bg\_AR158\_vs\_FR483**  
**PD-0.668404**

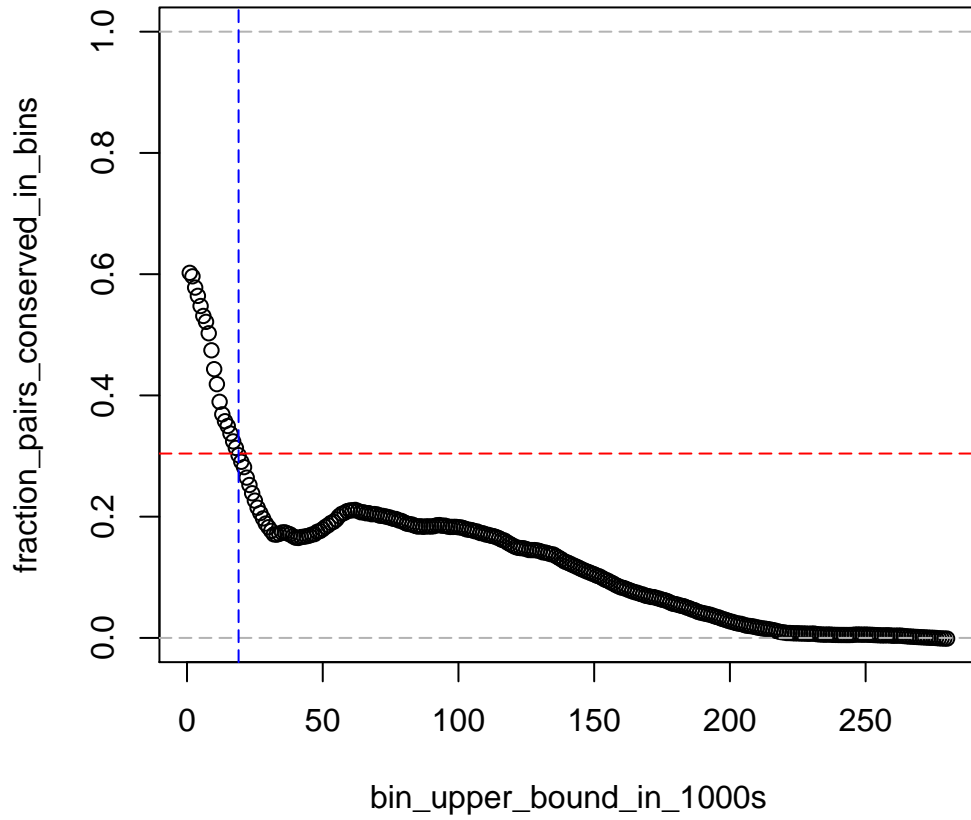

**Bin\_conservation\_minus\_bg\_AR158\_vs\_FR483**  
**PD-0.668404**

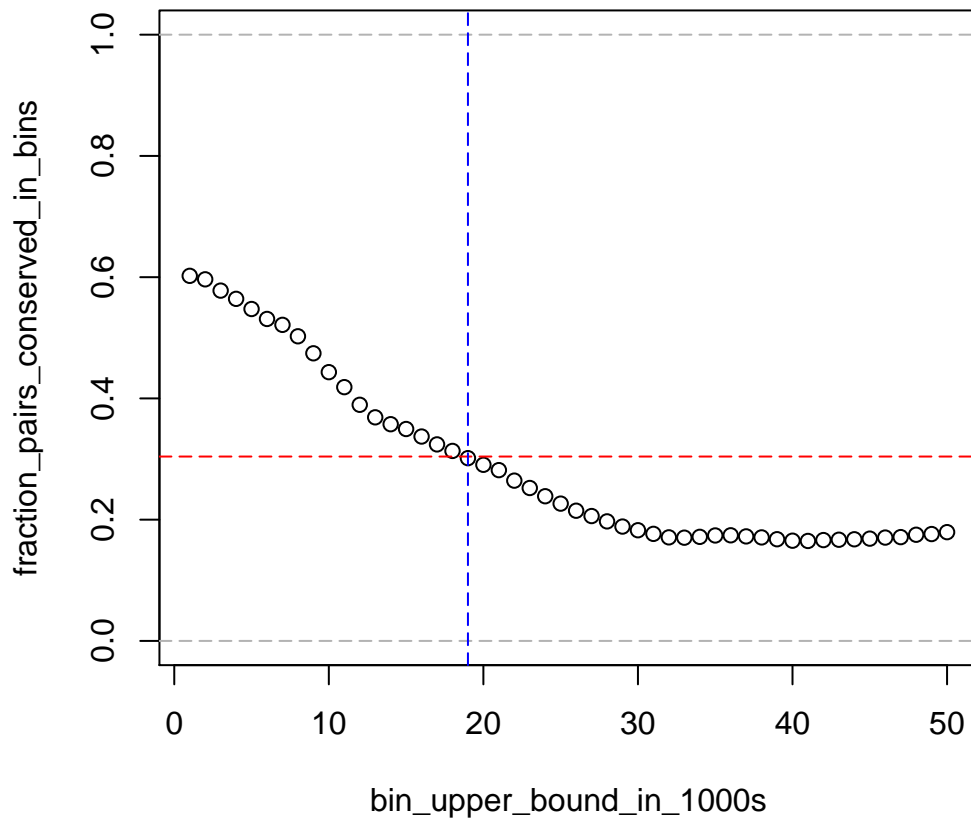

Supplement: s1 [file s1]

**Bin\_conservation\_minus\_bg\_AN69C\_vs\_CVR-1**  
**PD-0.633724**

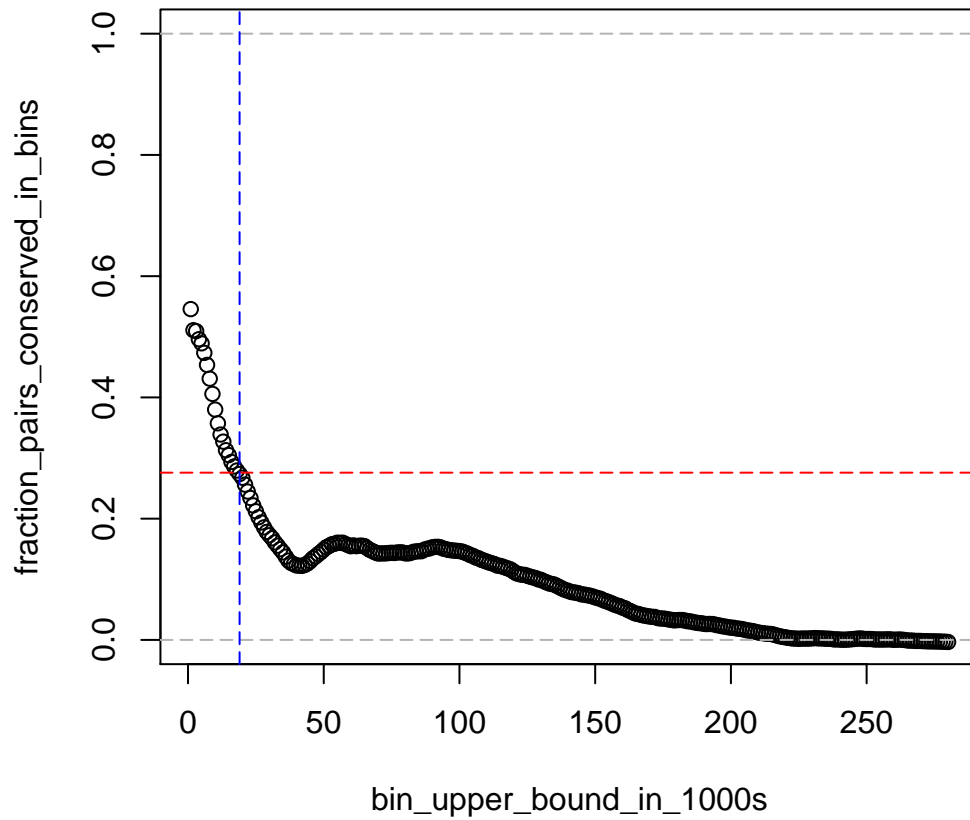

**Bin\_conservation\_minus\_bg\_AN69C\_vs\_CVR-1**  
**PD-0.633724**

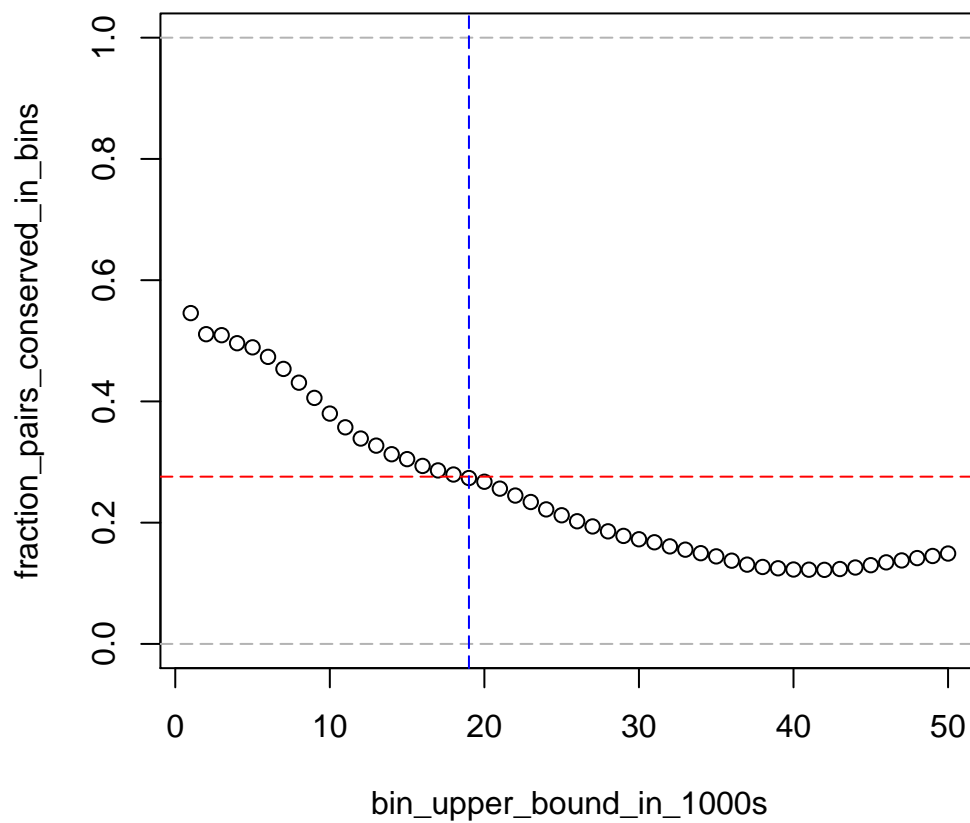

Supplement: s1 [file s1]

**Bin\_conservation\_minus\_bg\_ATCV1\_vs\_NE-JV-2**  
**PD-0.010417**

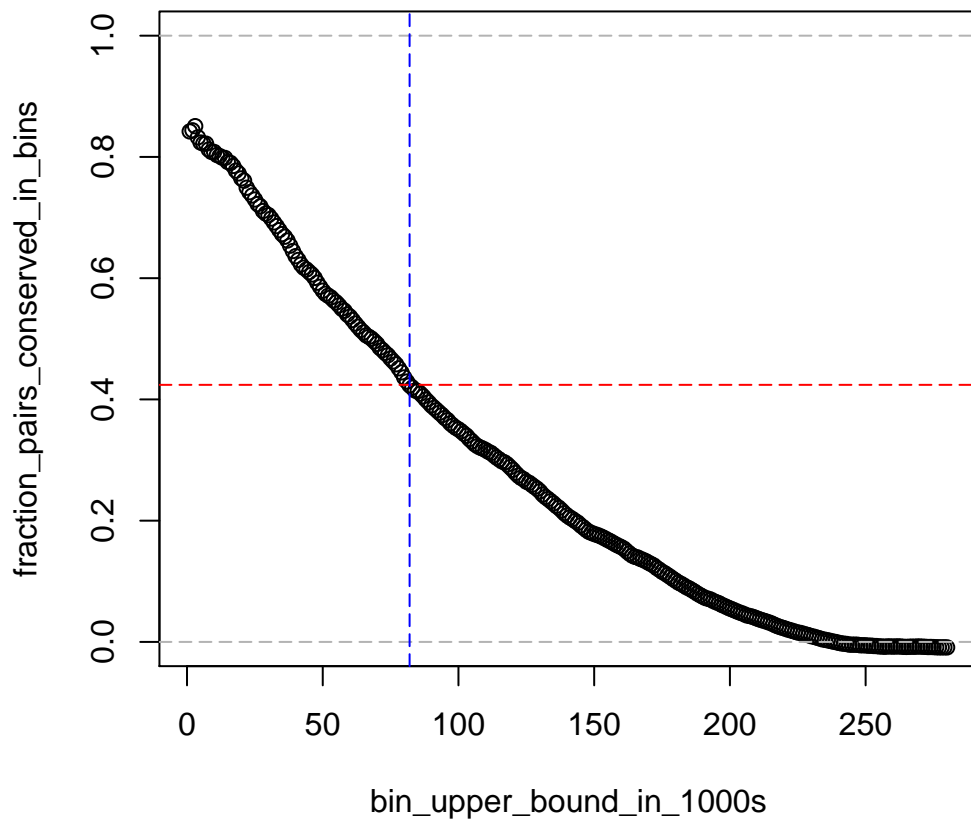

**Bin\_conservation\_minus\_bg\_ATCV1\_vs\_NE-JV-2**  
**PD-0.010417**

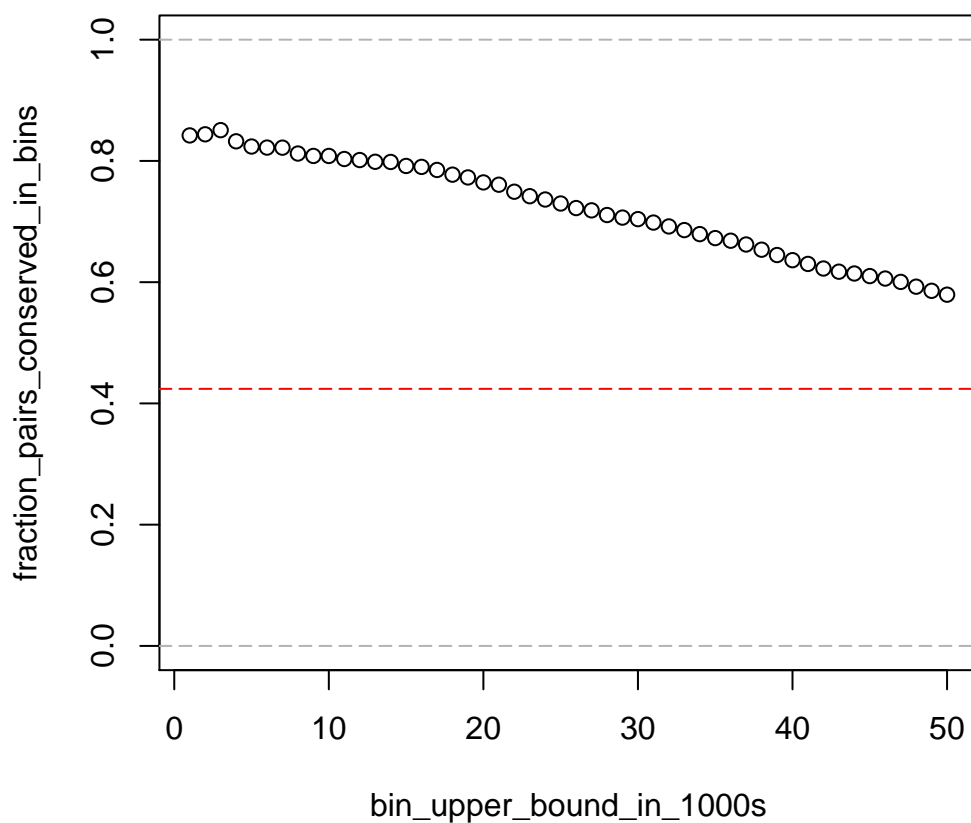

Supplement: s1 [file s1]

**Bin\_conservation\_minus\_bg\_MA-1D\_vs\_TN603.4.2**  
**PD-0.690497**

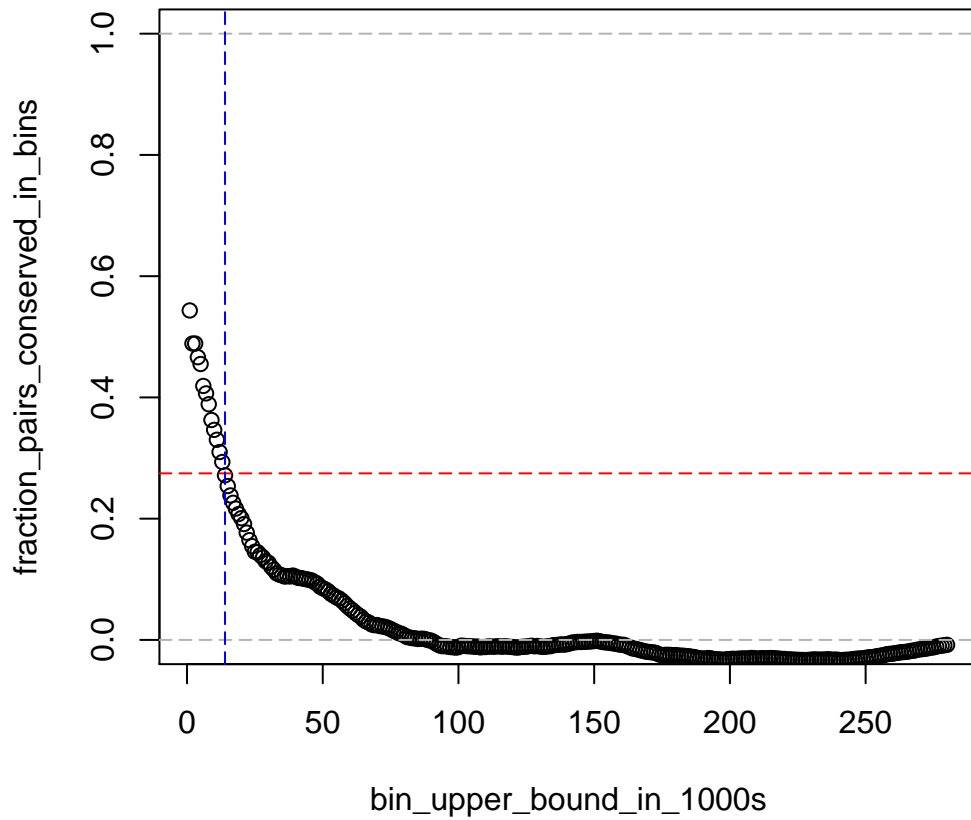

**Bin\_conservation\_minus\_bg\_MA-1D\_vs\_TN603.4.2**  
**PD-0.690497**

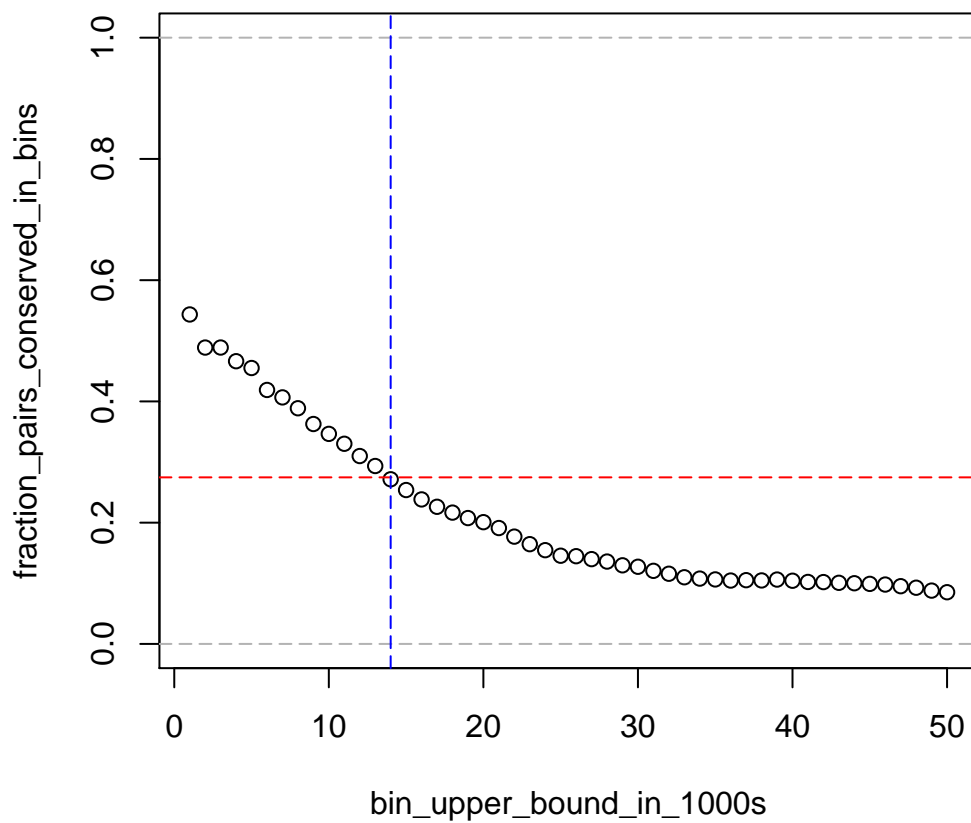

Supplement: s1 [file s1]

**Bin\_conservation\_minus\_bg\_IL-3A\_vs\_TN603.4.2**  
**PD-0.670842**

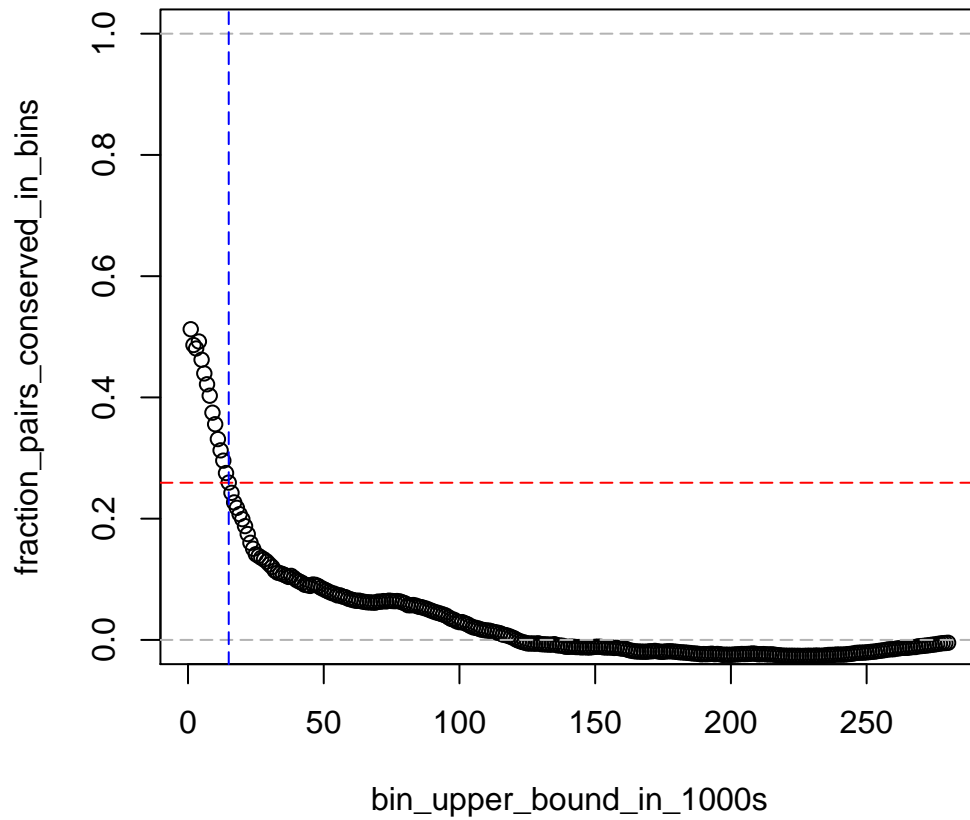

**Bin\_conservation\_minus\_bg\_IL-3A\_vs\_TN603.4.2**  
**PD-0.670842**

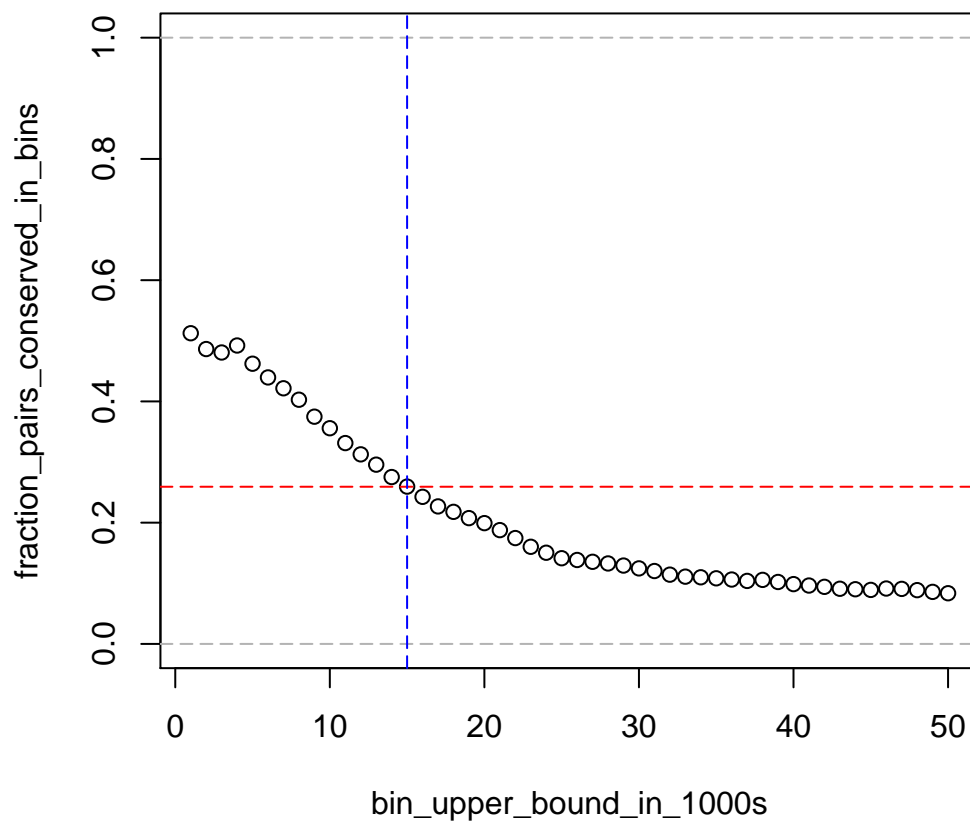

Supplement: s1 [file s1]

**Bin\_conservation\_minus\_bg\_MN0810.1\_vs\_OR0704.3**  
**PD-0.111232**

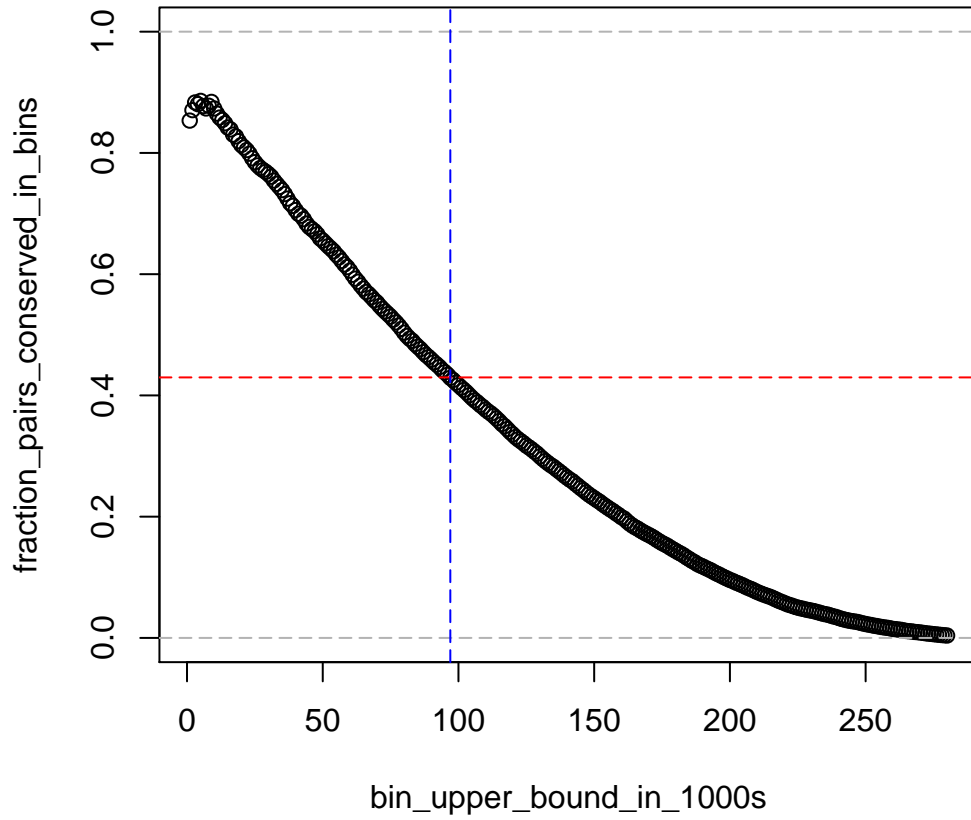

**Bin\_conservation\_minus\_bg\_MN0810.1\_vs\_OR0704.3**  
**PD-0.111232**

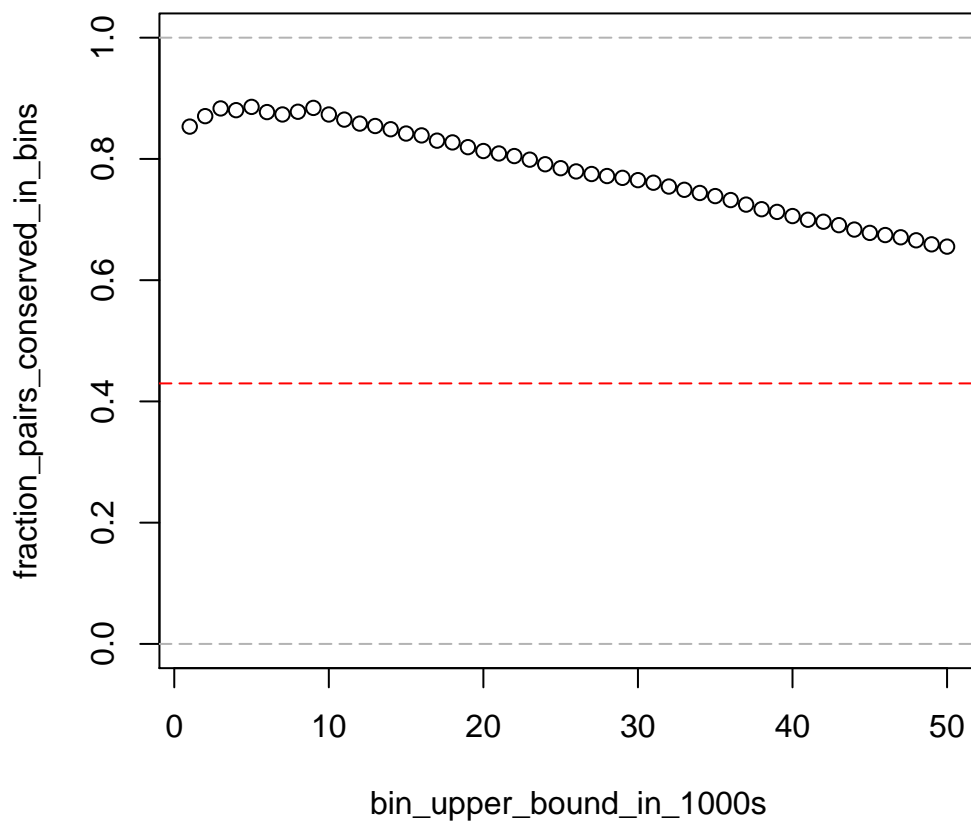

Supplement: s1 [file s1]

**Bin\_conservation\_minus\_bg\_CVB-1\_vs\_NY2A**  
**PD-0.683698**

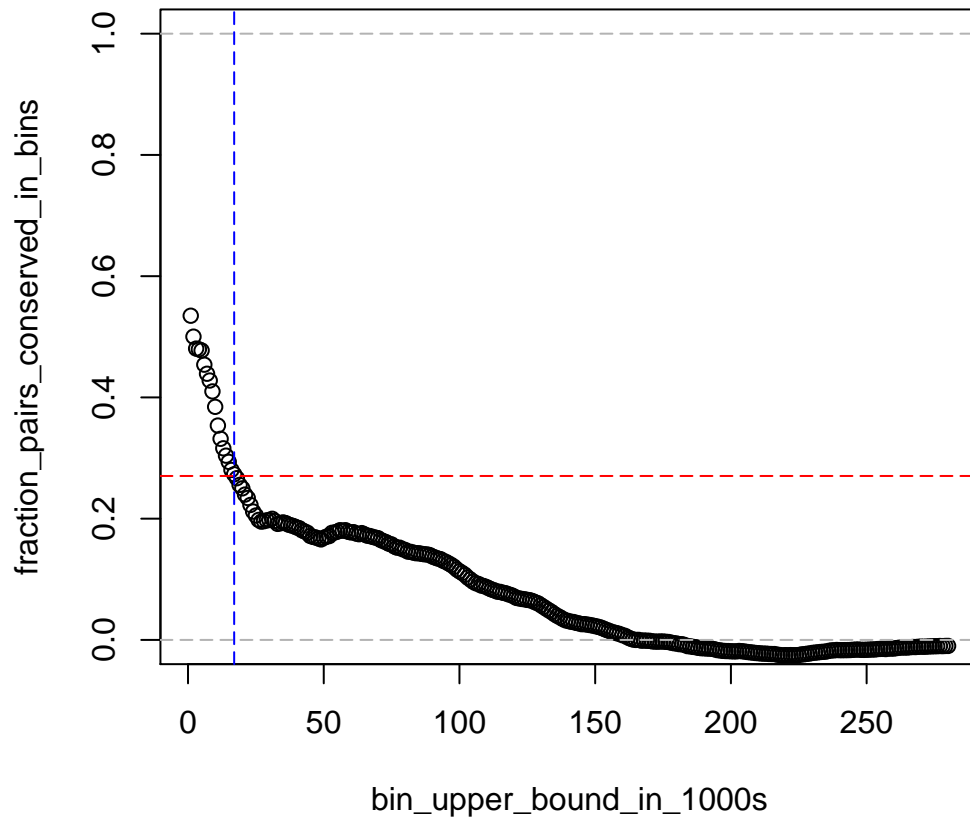

**Bin\_conservation\_minus\_bg\_CVB-1\_vs\_NY2A**  
**PD-0.683698**

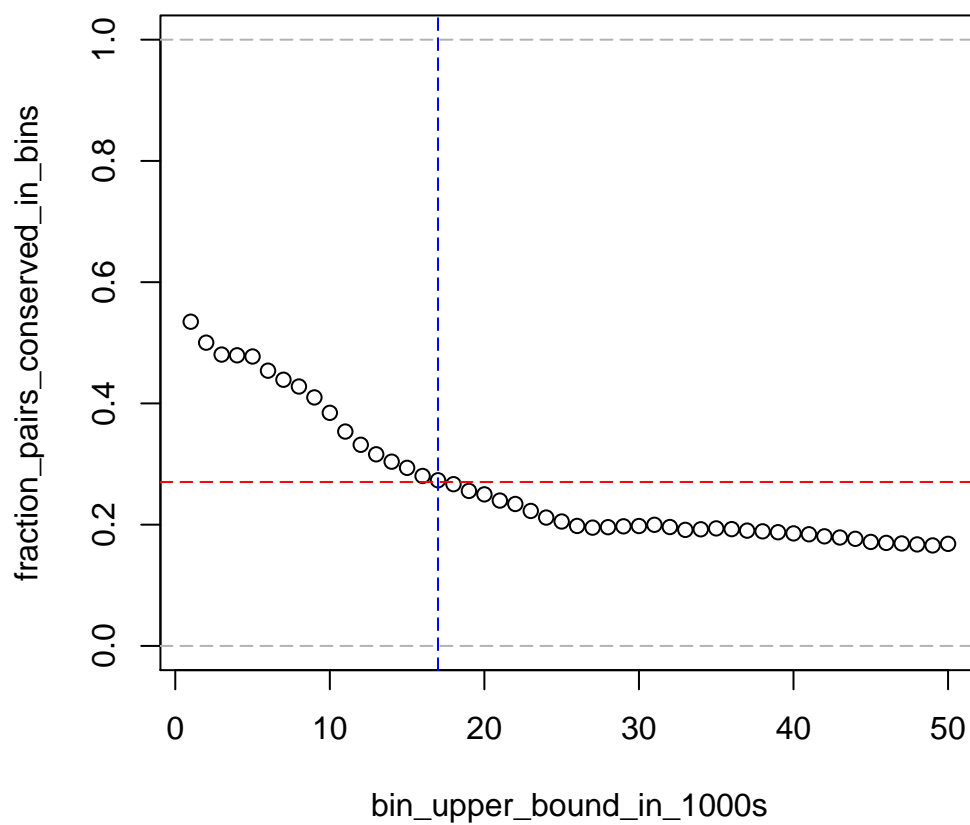

Supplement: s1 [file s1]

**Bin\_conservation\_minus\_bg\_IL-5-2s1\_vs\_NY-2B**  
**PD-0.012189**

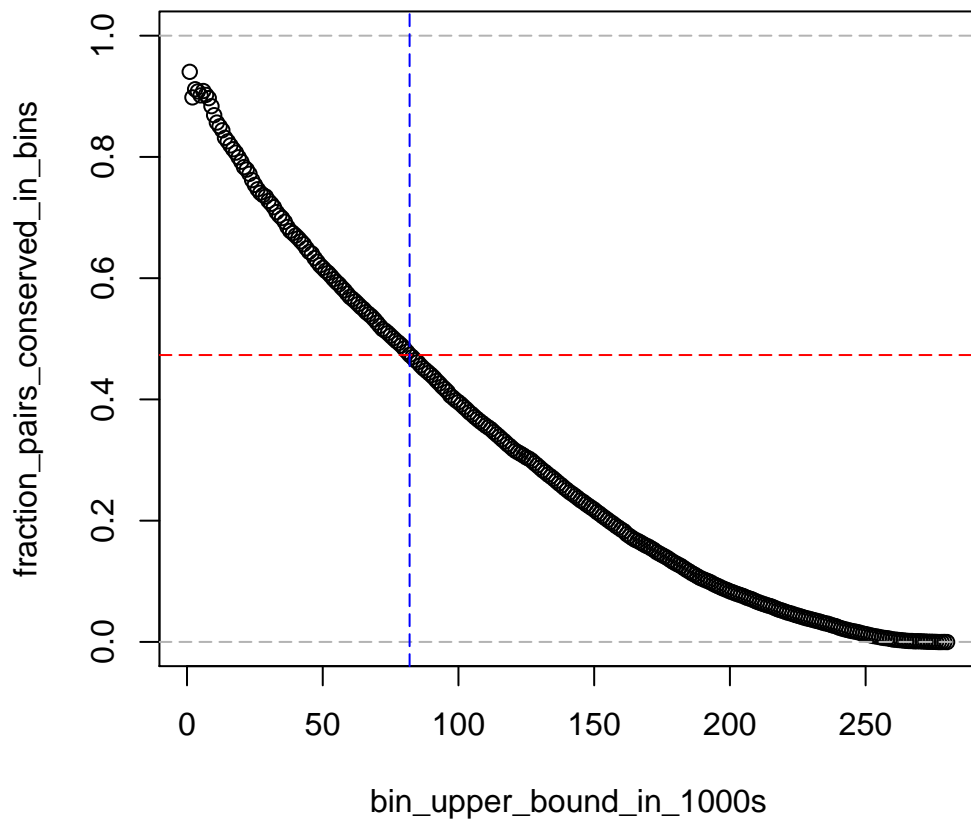

**Bin\_conservation\_minus\_bg\_IL-5-2s1\_vs\_NY-2B**  
**PD-0.012189**

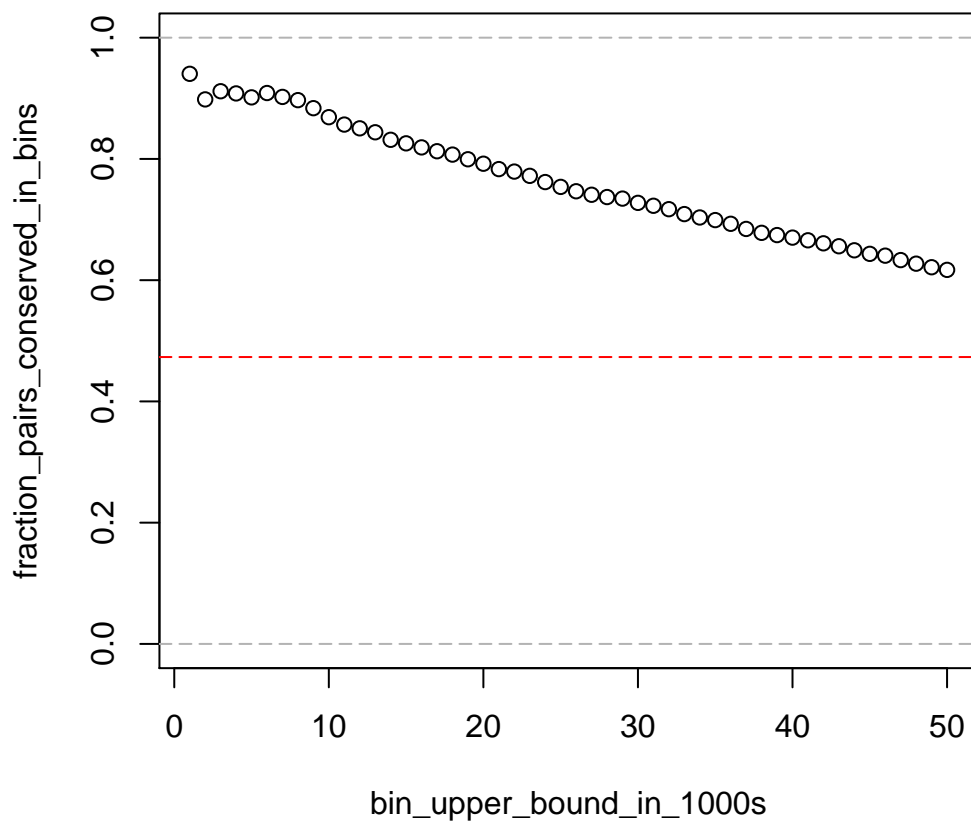

Supplement: s1 [file s1]

**Bin\_conservation\_minus\_bg\_IL-5-2s1\_vs\_NY2A**  
**PD-0.052001**

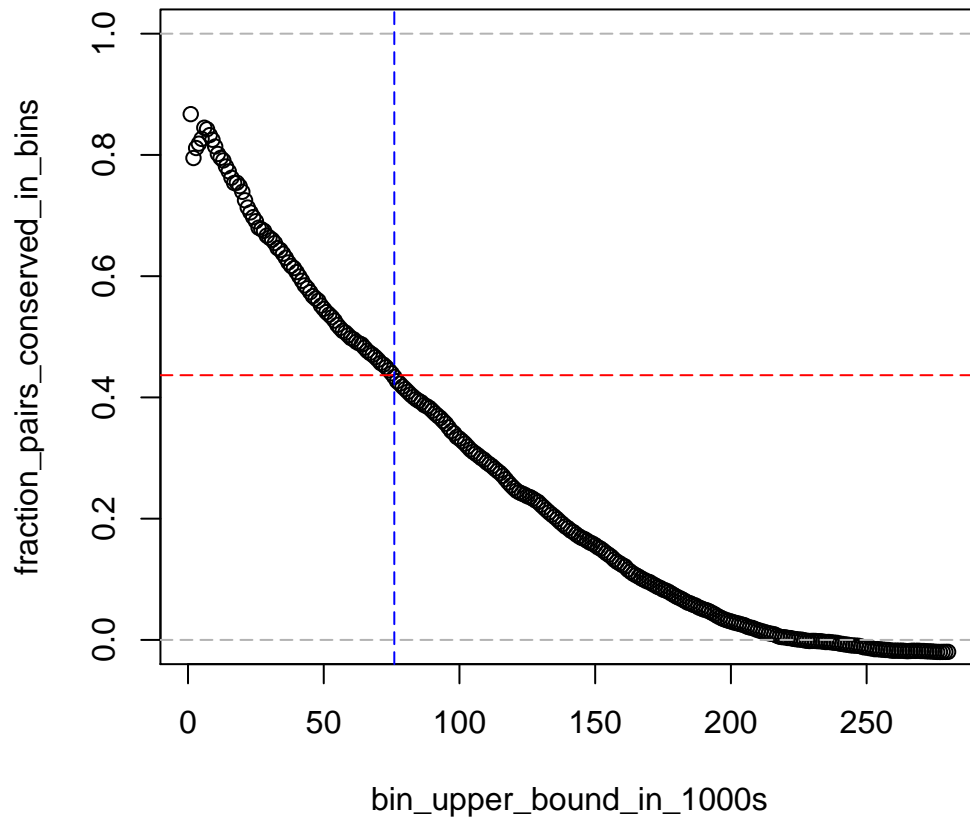

**Bin\_conservation\_minus\_bg\_IL-5-2s1\_vs\_NY2A**  
**PD-0.052001**

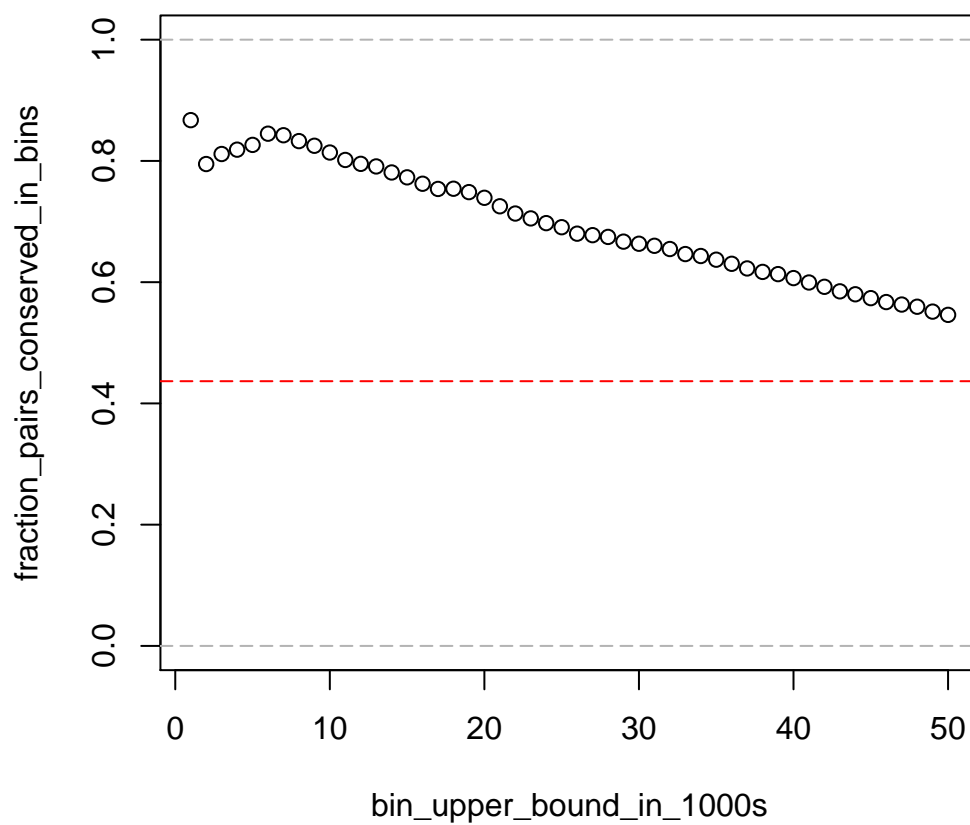

Supplement: s1 [file s1]

**Bin\_conservation\_minus\_bg\_Can0610SP\_vs\_NE-JV-1**  
**PD-0.49413**

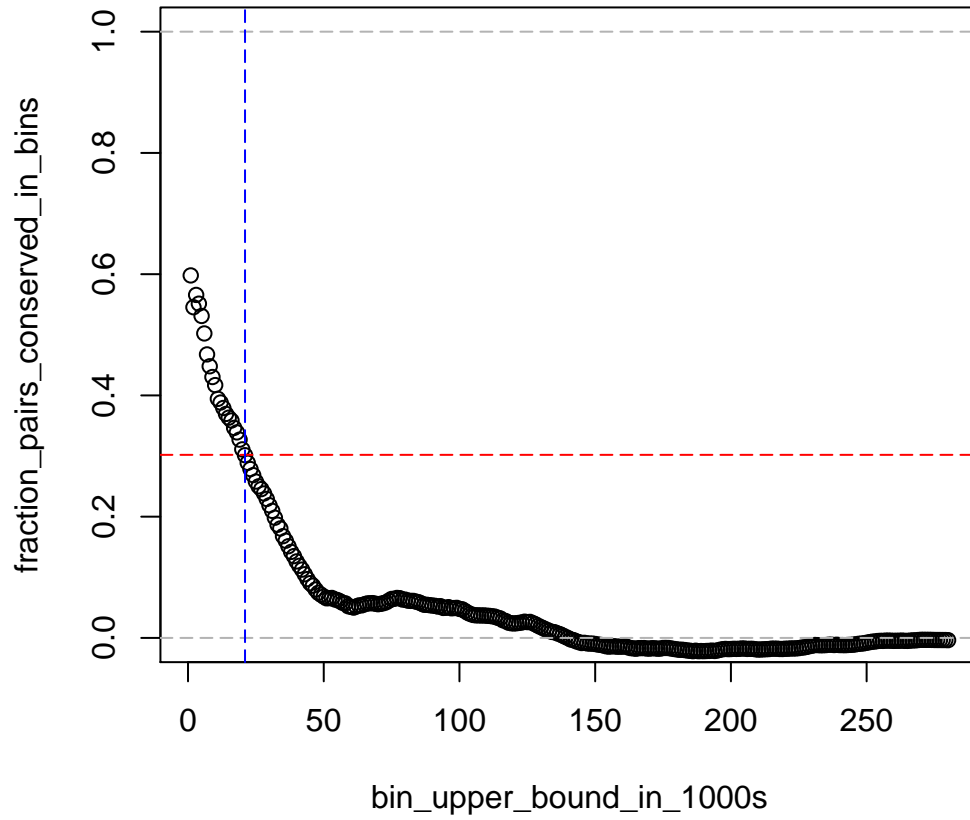

**Bin\_conservation\_minus\_bg\_Can0610SP\_vs\_NE-JV-1**  
**PD-0.49413**

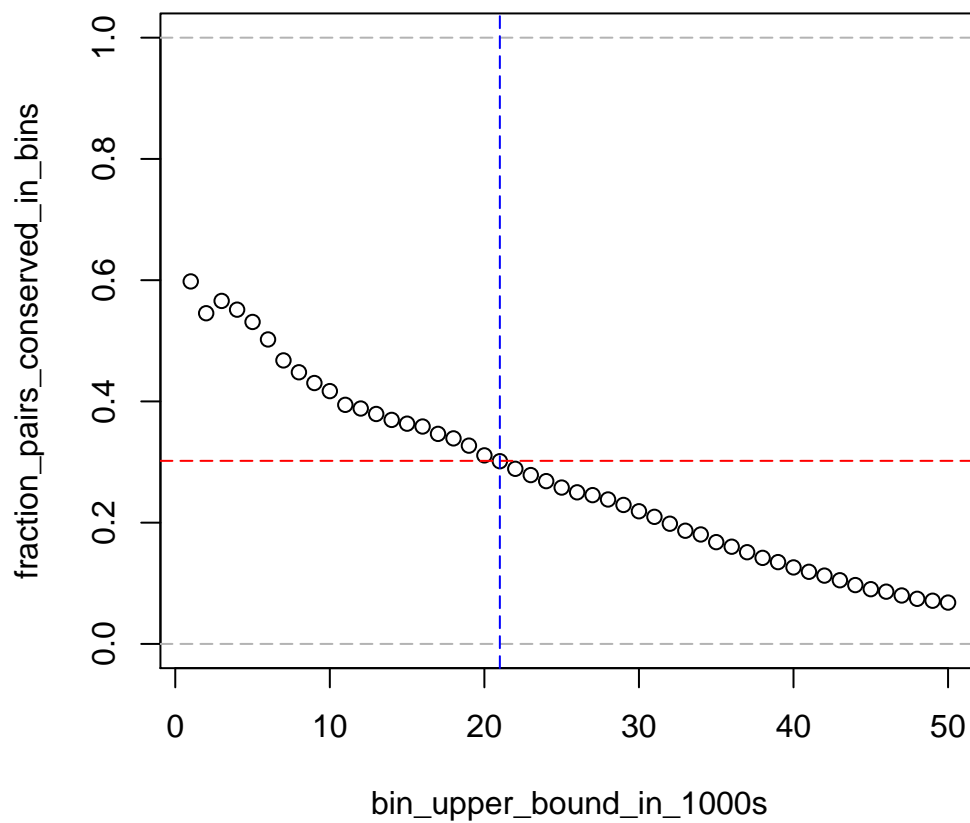

Supplement: s1 [file s1]

**Bin\_conservation\_minus\_bg\_MA-1D\_vs\_NTS-1**  
**PD-0.695806**

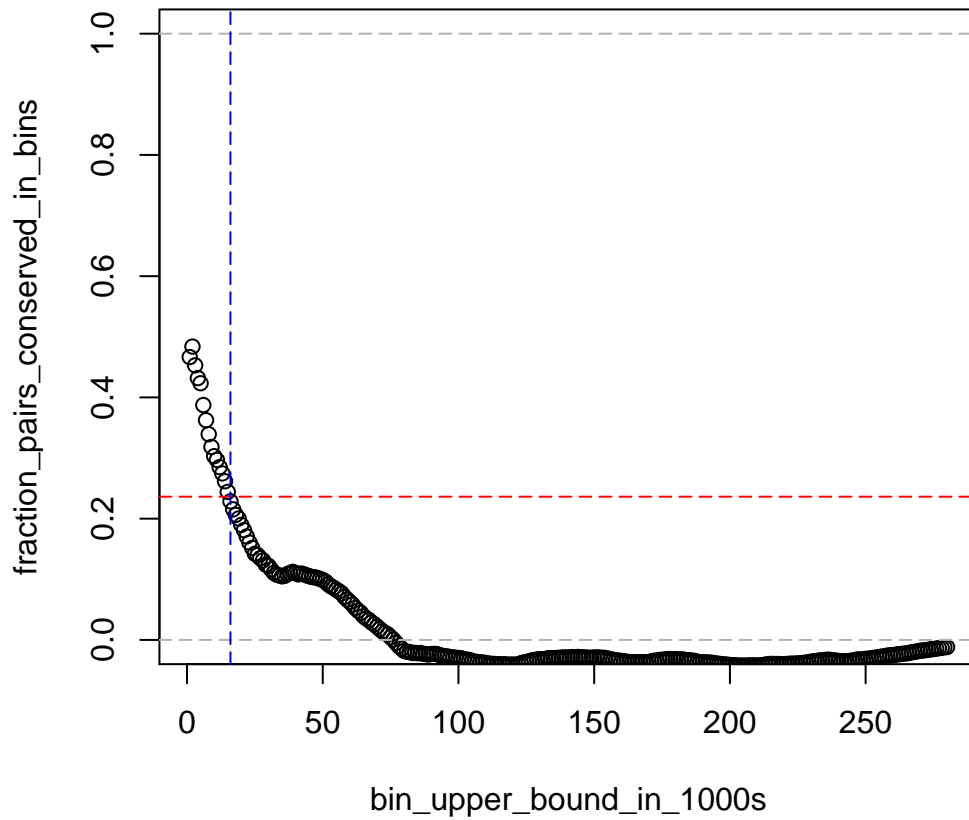

**Bin\_conservation\_minus\_bg\_MA-1D\_vs\_NTS-1**  
**PD-0.695806**

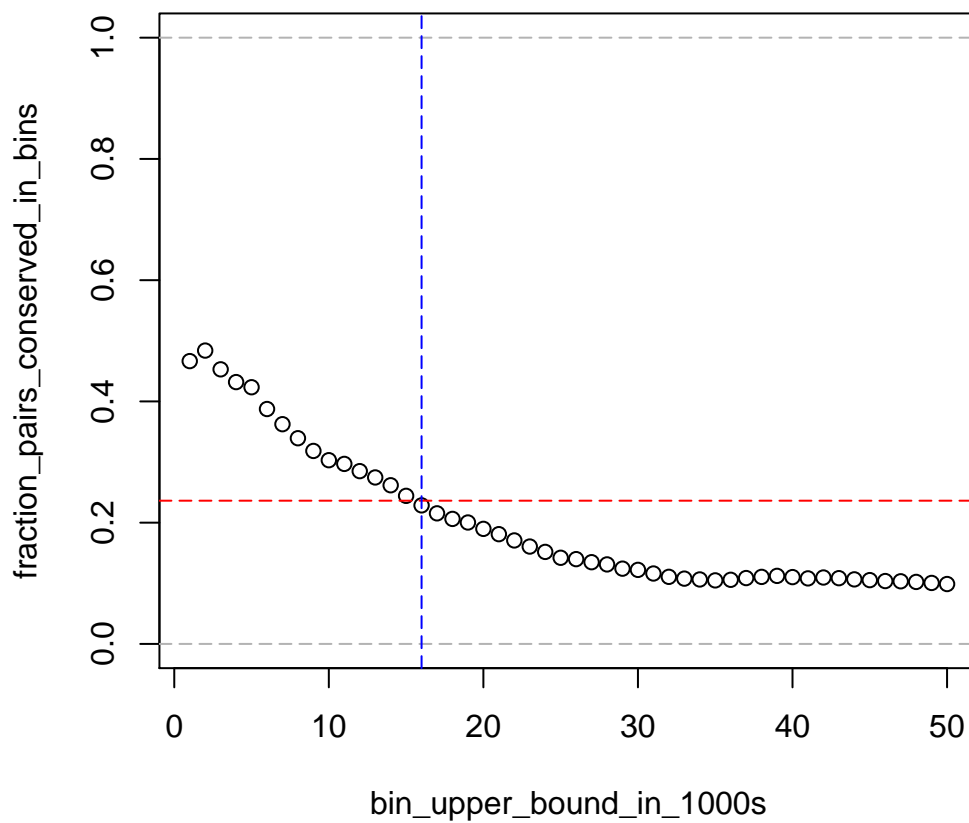

Supplement: s1 [file s1]

**Bin\_conservation\_minus\_bg\_Can0610SP\_vs\_CVB-1**  
**PD-0.476127**

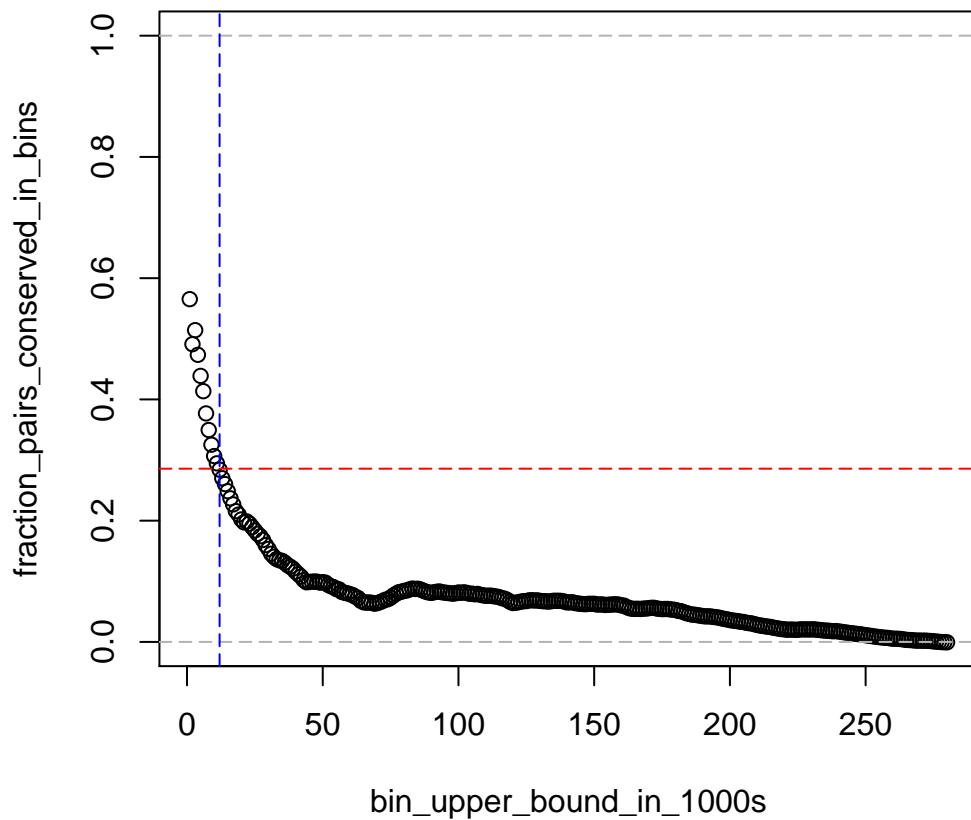

**Bin\_conservation\_minus\_bg\_Can0610SP\_vs\_CVB-1**  
**PD-0.476127**

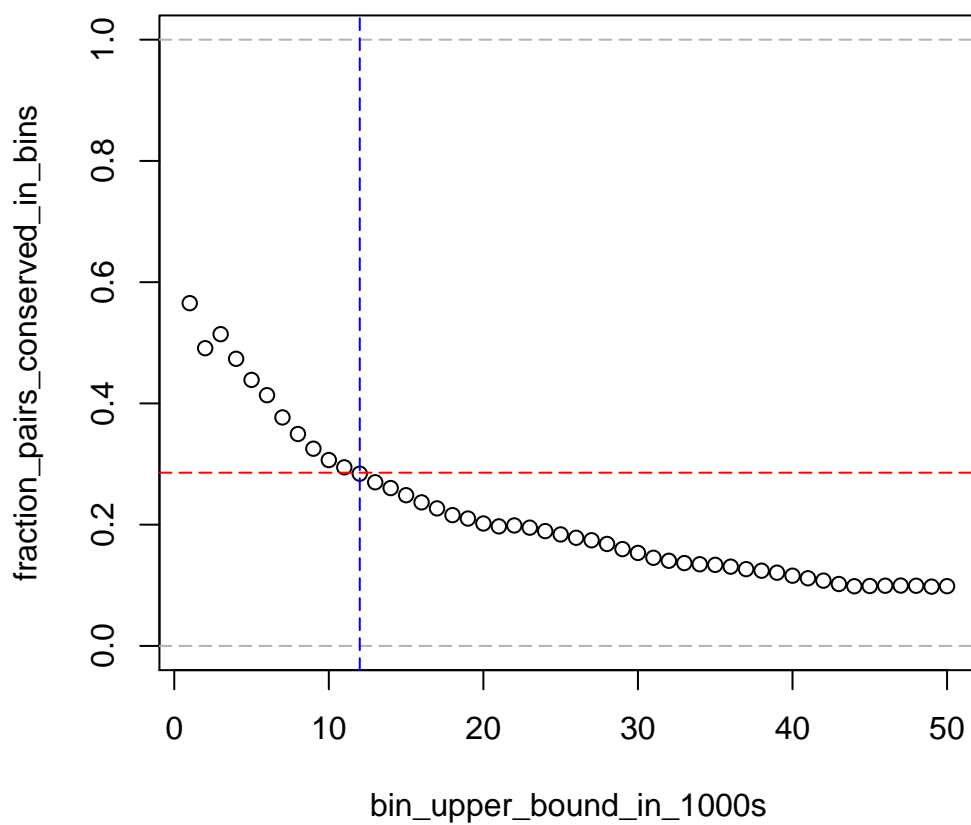

Supplement: s1 [file s1]

**Bin\_conservation\_minus\_bg\_CVR-1\_vs\_NYs-1**  
**PD-0.658168**

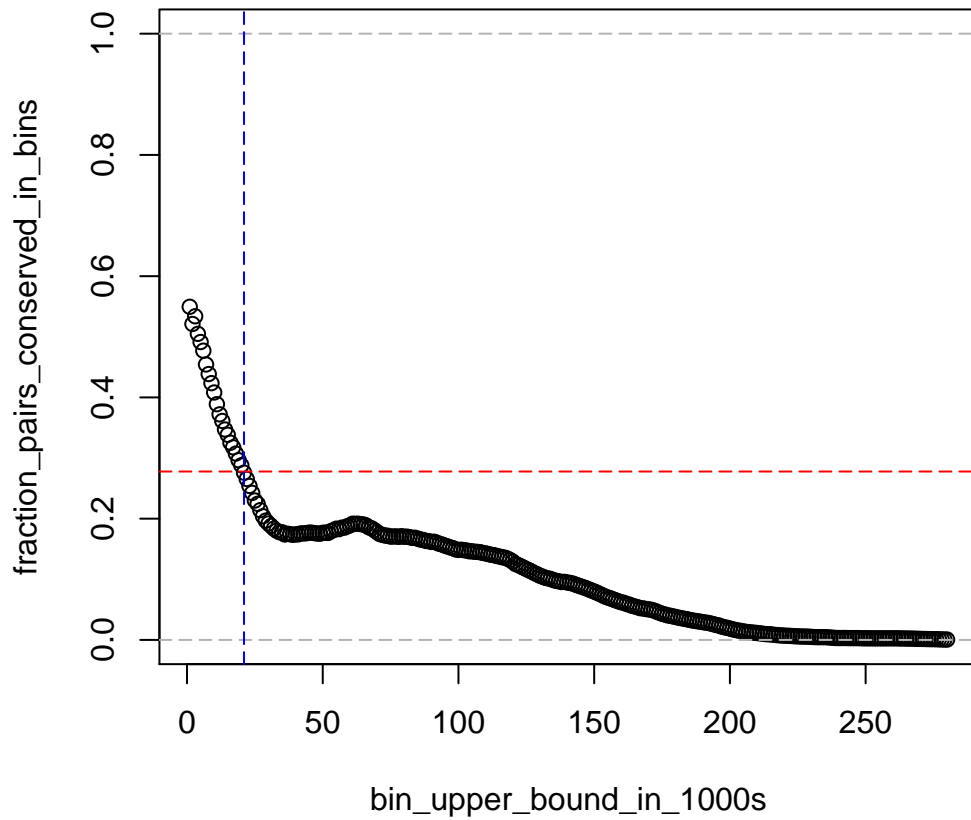

**Bin\_conservation\_minus\_bg\_CVR-1\_vs\_NYs-1**  
**PD-0.658168**

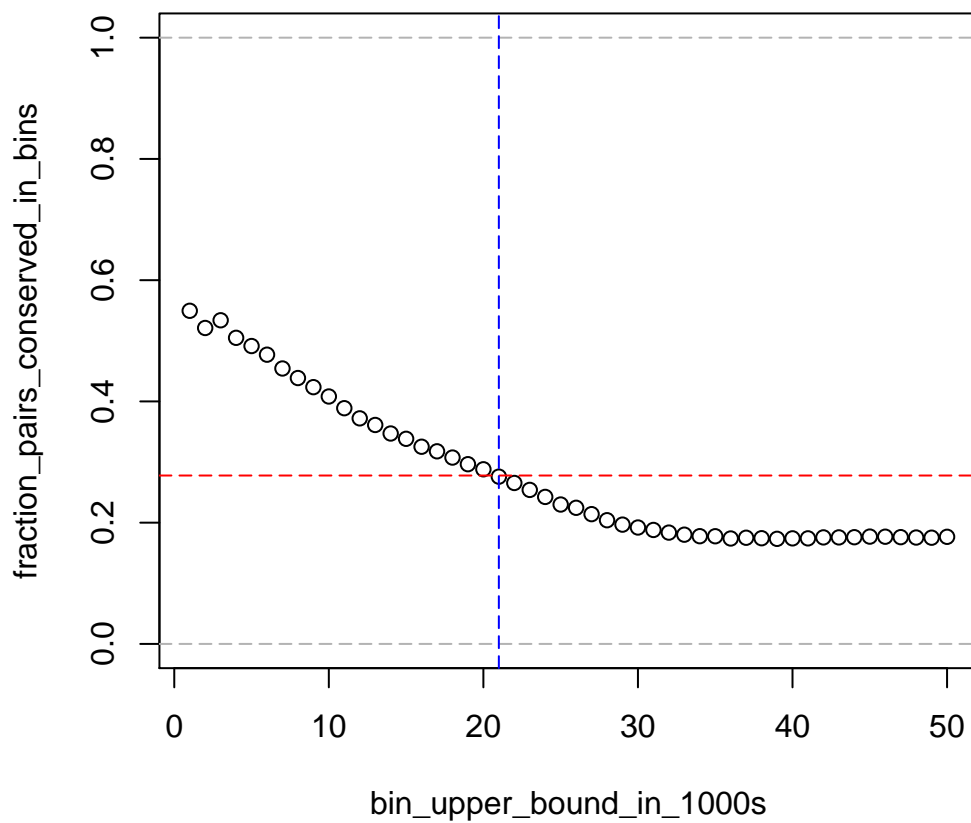

Supplement: s1 [file s1]

**Bin\_conservation\_minus\_bg\_CZ-2\_vs\_NW665.2**  
**PD-0.044829**

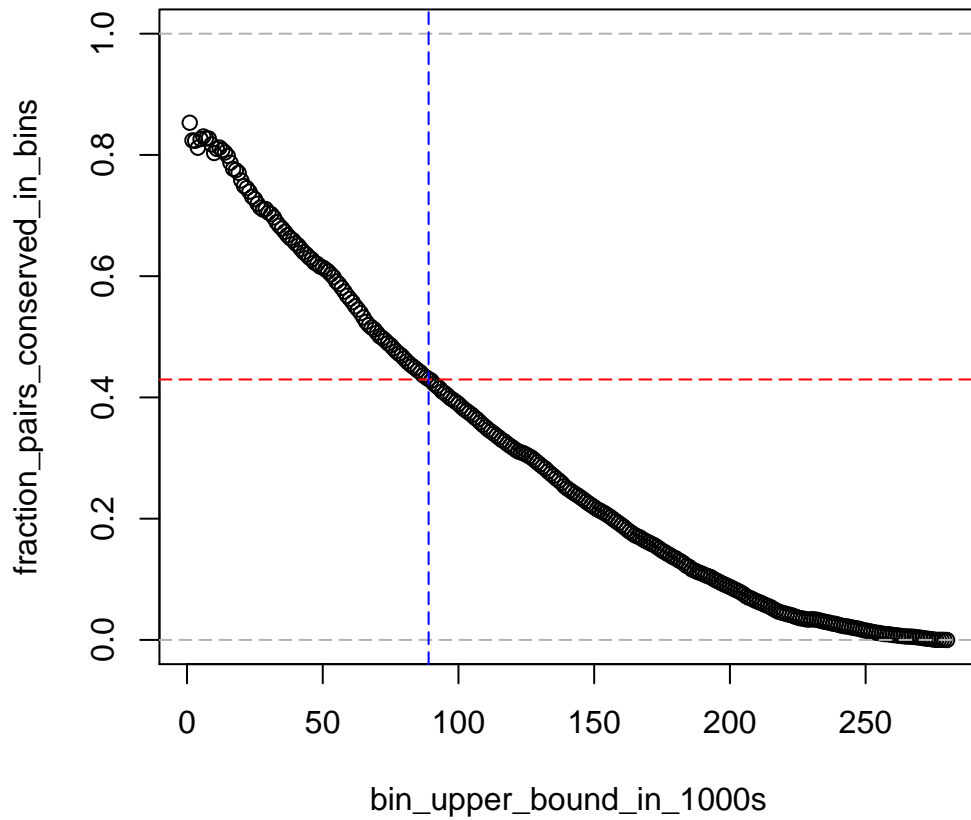

**Bin\_conservation\_minus\_bg\_CZ-2\_vs\_NW665.2**  
**PD-0.044829**

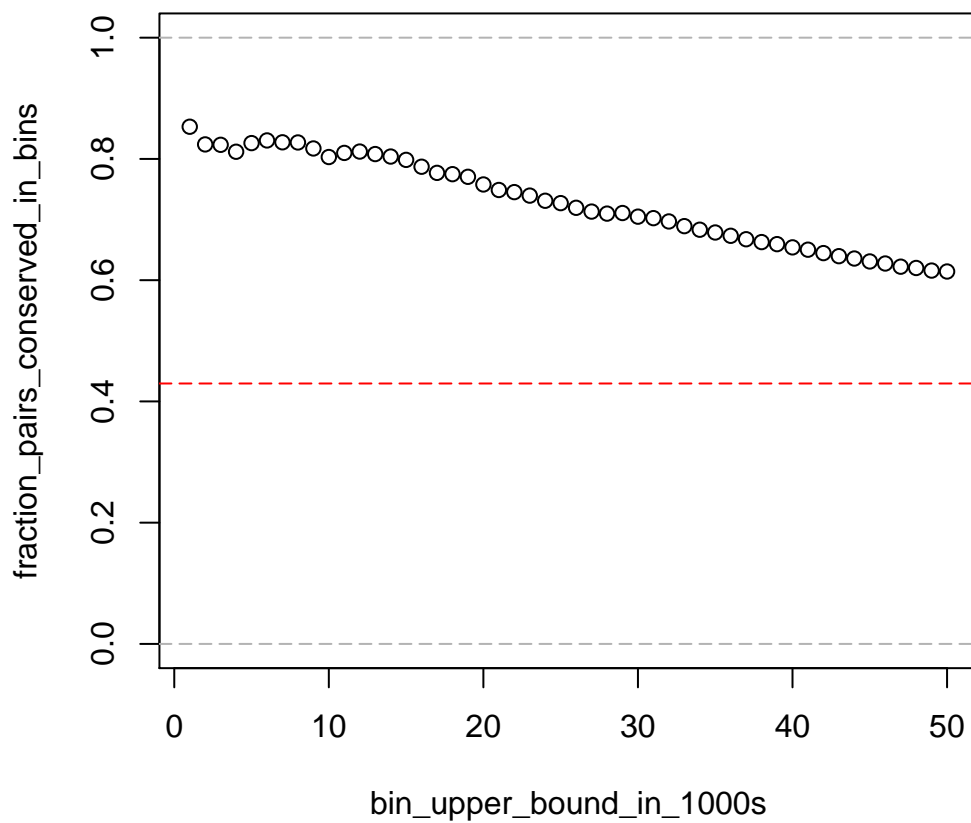

Supplement: s1 [file s1]

**Bin\_conservation\_minus\_bg\_AR158\_vs\_WI0606**  
**PD-0.709434**

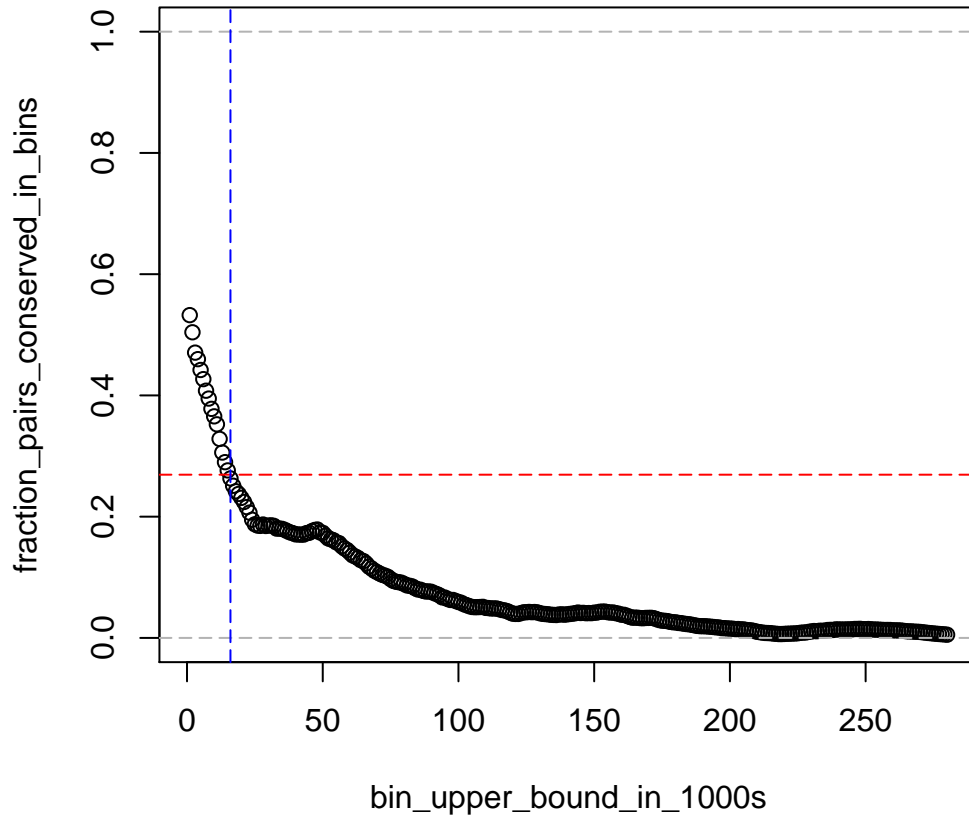

**Bin\_conservation\_minus\_bg\_AR158\_vs\_WI0606**  
**PD-0.709434**

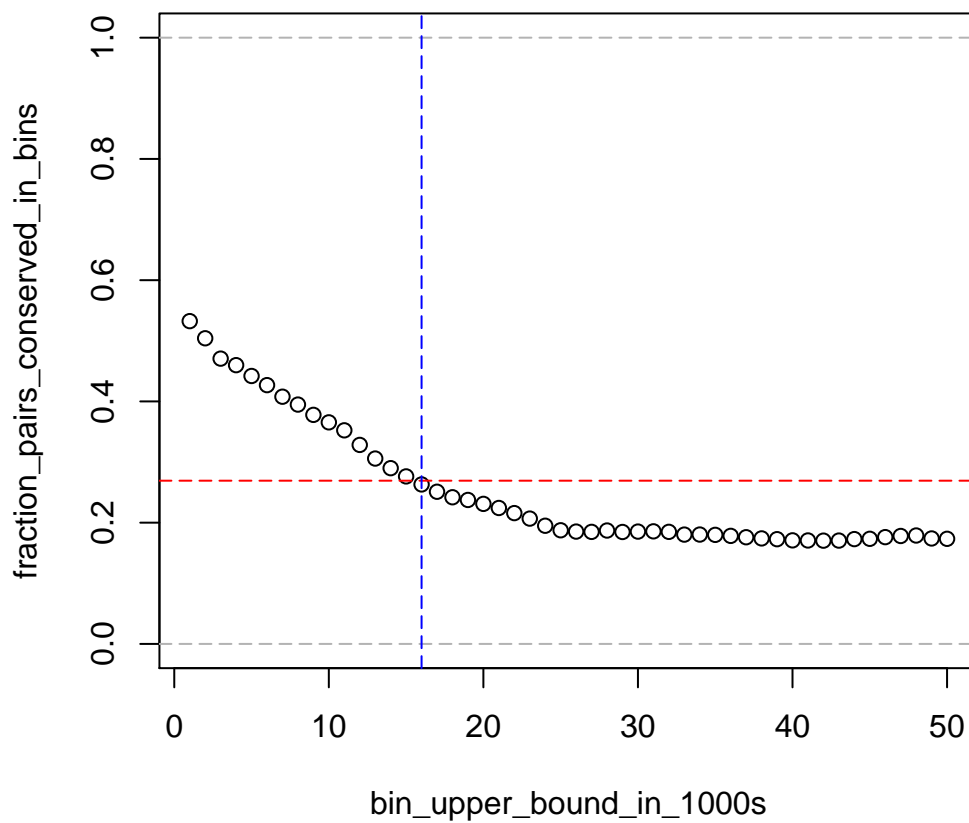

Supplement: s1 [file s1]

**Bin\_conservation\_minus\_bg\_AN69C\_vs\_Canal-1**  
**PD-0.678815**

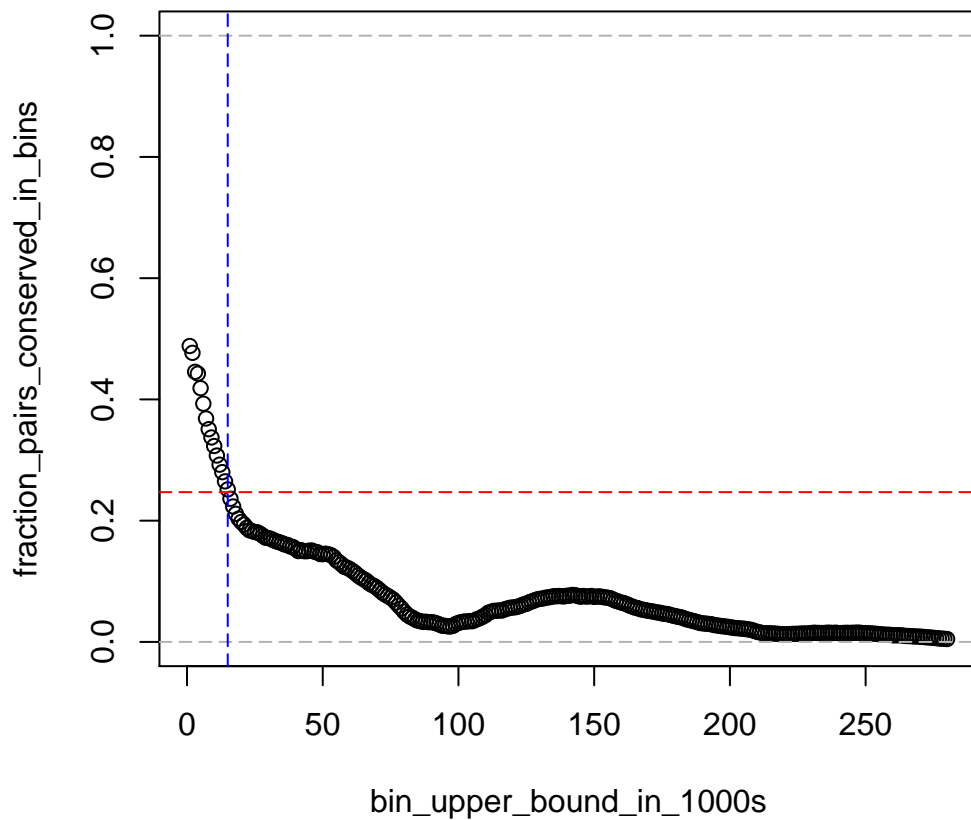

**Bin\_conservation\_minus\_bg\_AN69C\_vs\_Canal-1**  
**PD-0.678815**

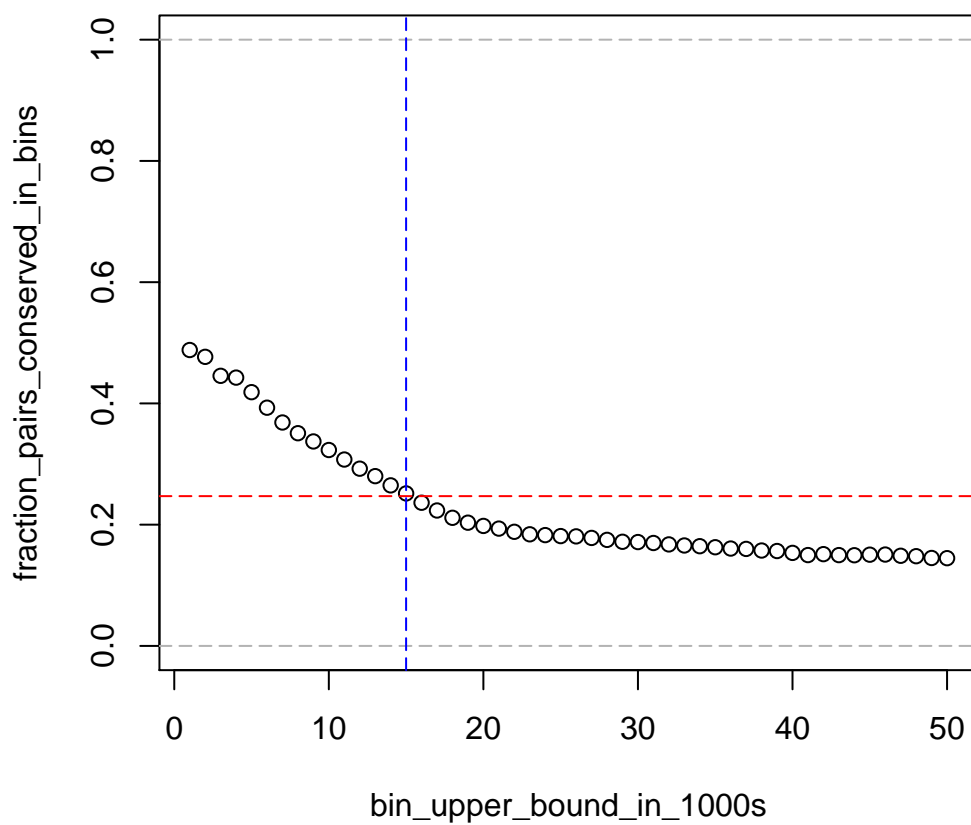

Supplement: s1 [file s1]

**Bin\_conservation\_minus\_bg\_IL-5-2s1\_vs\_OR0704.3**  
**PD-0.703622**

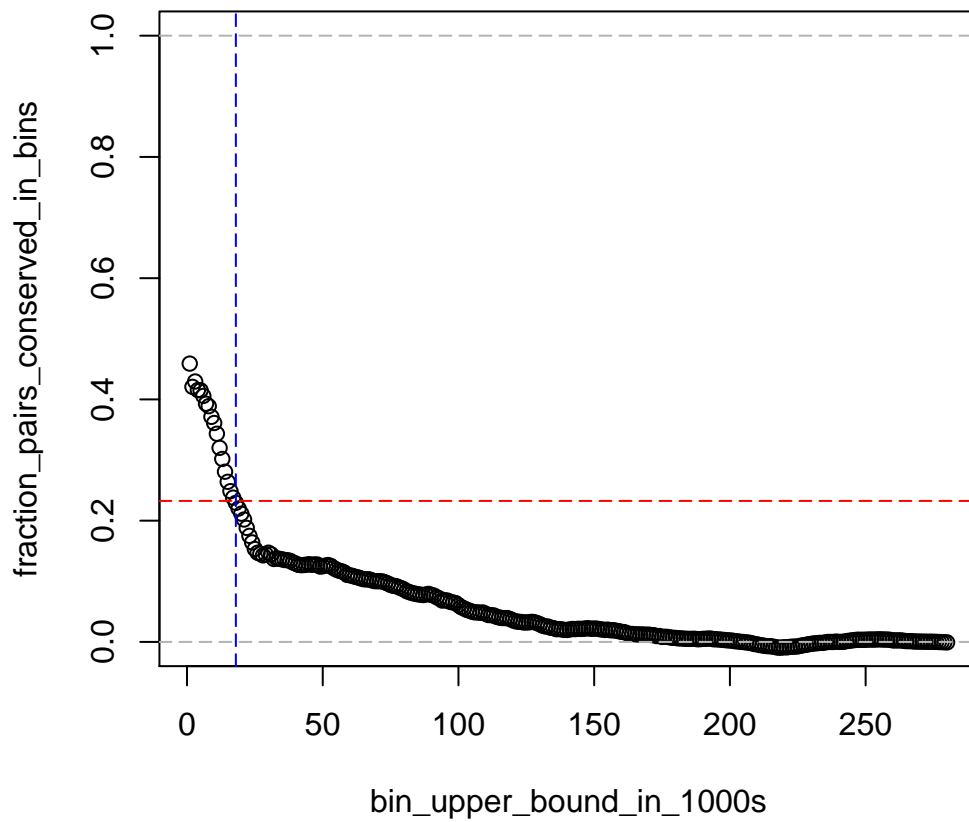

**Bin\_conservation\_minus\_bg\_IL-5-2s1\_vs\_OR0704.3**  
**PD-0.703622**

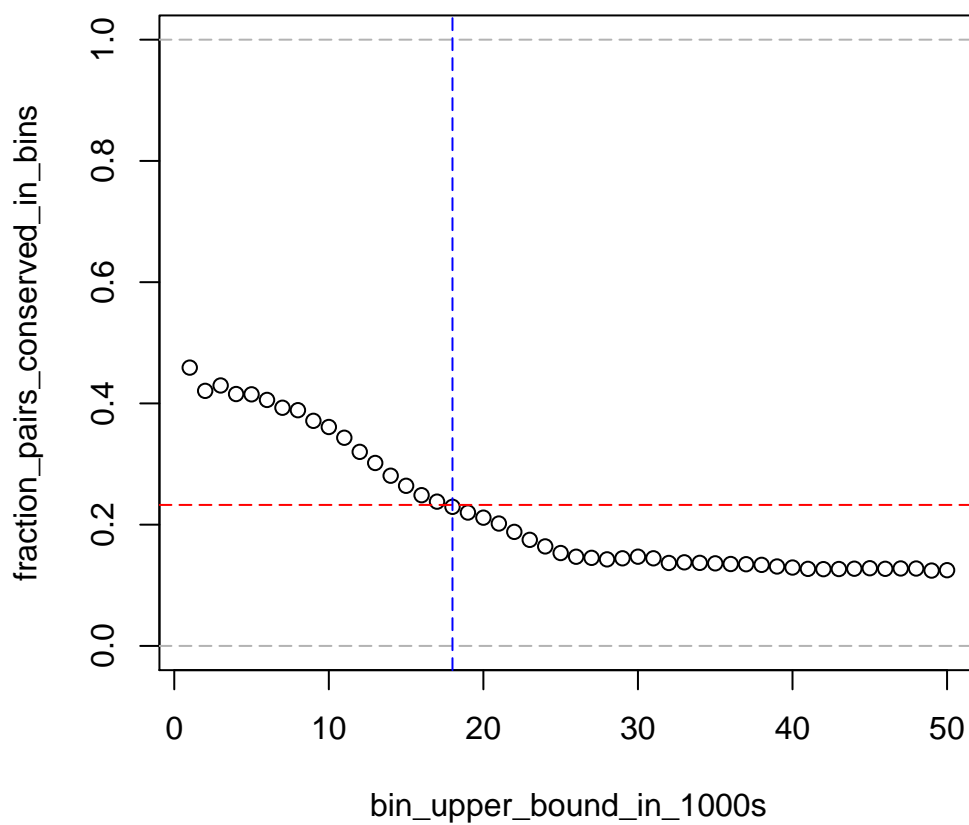

Supplement: s1 [file s1]

**Bin\_conservation\_minus\_bg\_MA-1E\_vs\_MT325**  
**PD-0.65161**

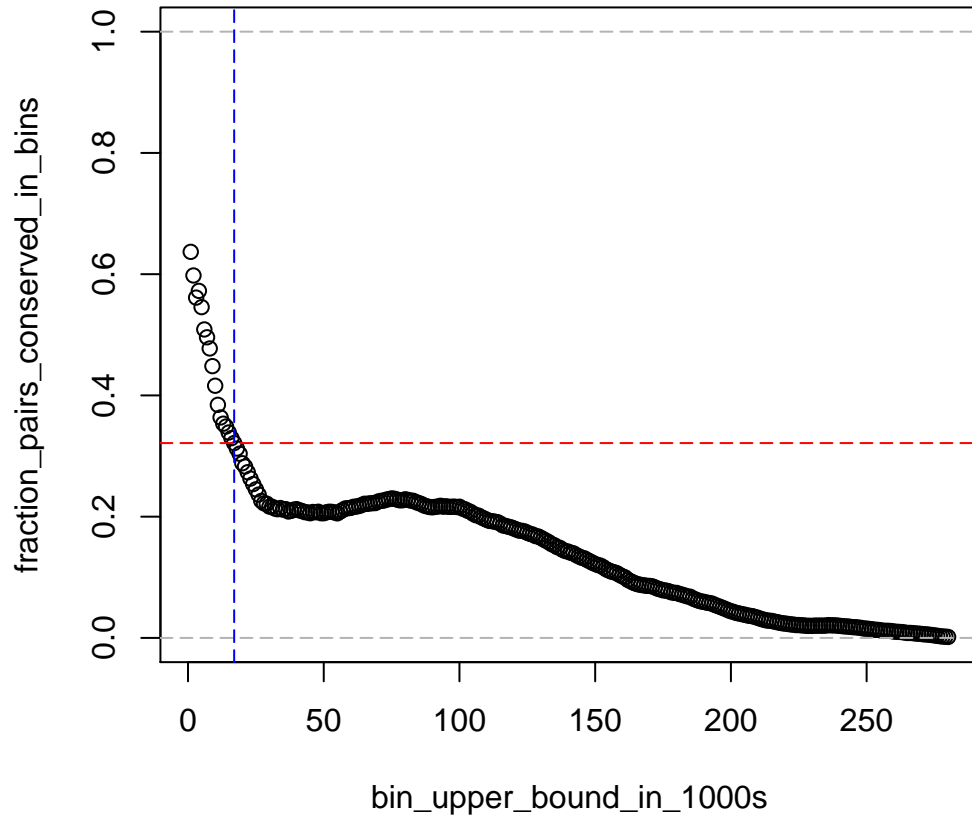

**Bin\_conservation\_minus\_bg\_MA-1E\_vs\_MT325**  
**PD-0.65161**

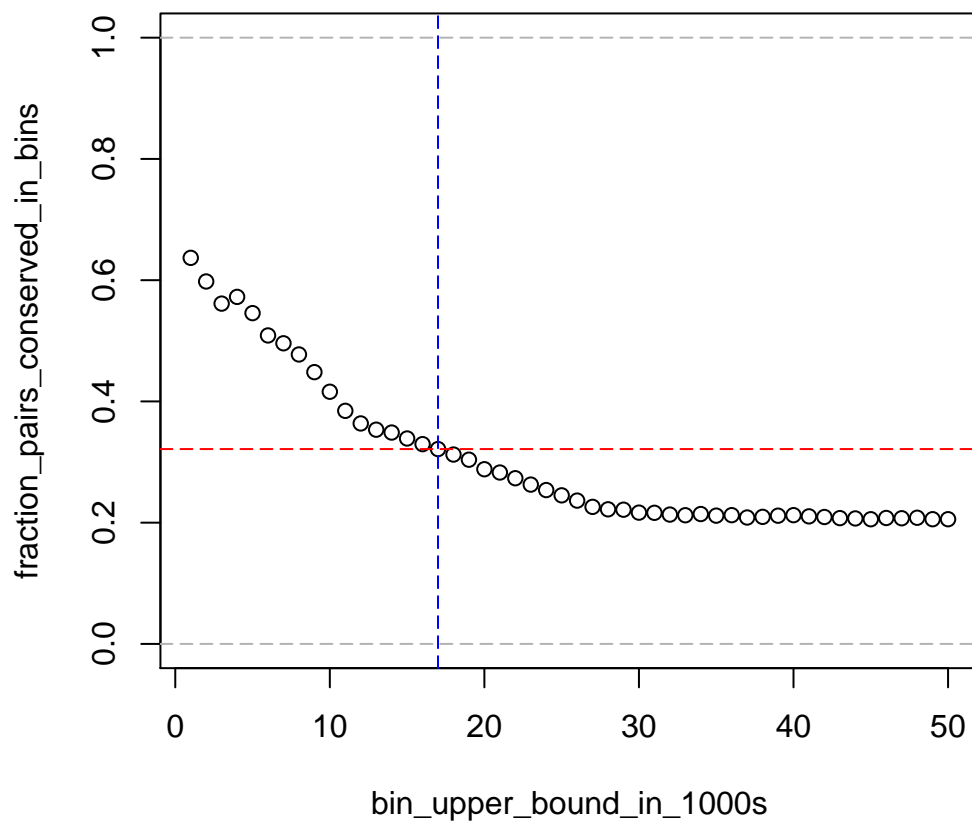

Supplement: s1 [file s1]

**Bin\_conservation\_minus\_bg\_IL-5-2s1\_vs\_MA-1D**  
**PD-0.003401**

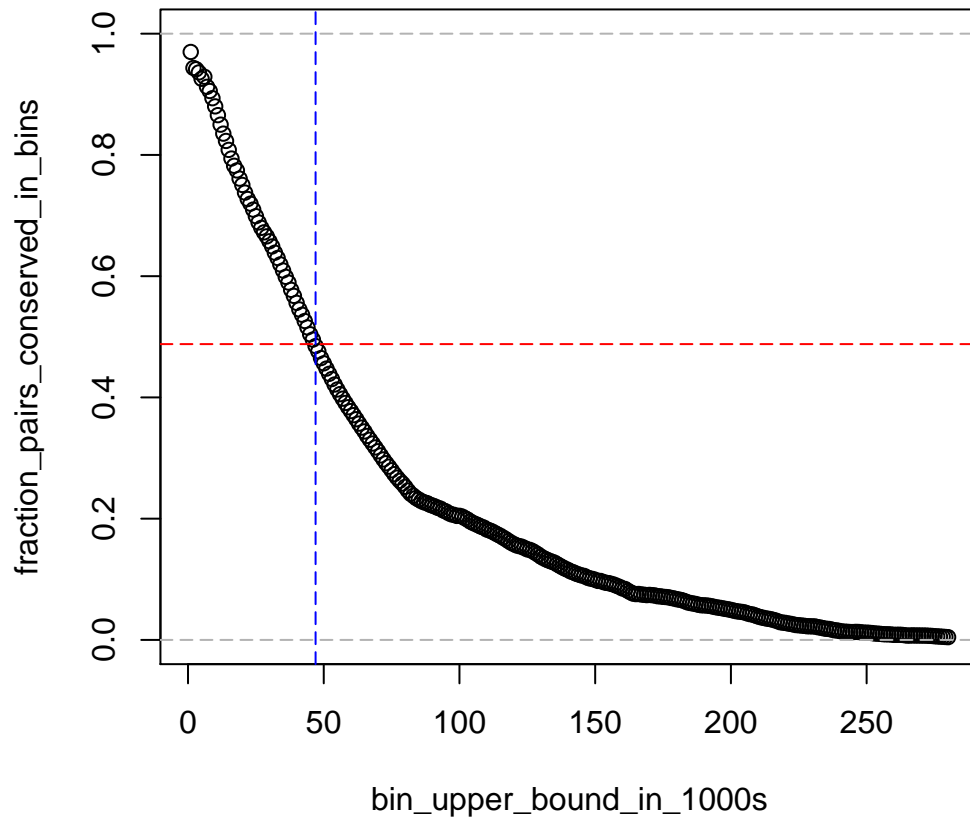

**Bin\_conservation\_minus\_bg\_IL-5-2s1\_vs\_MA-1D**  
**PD-0.003401**

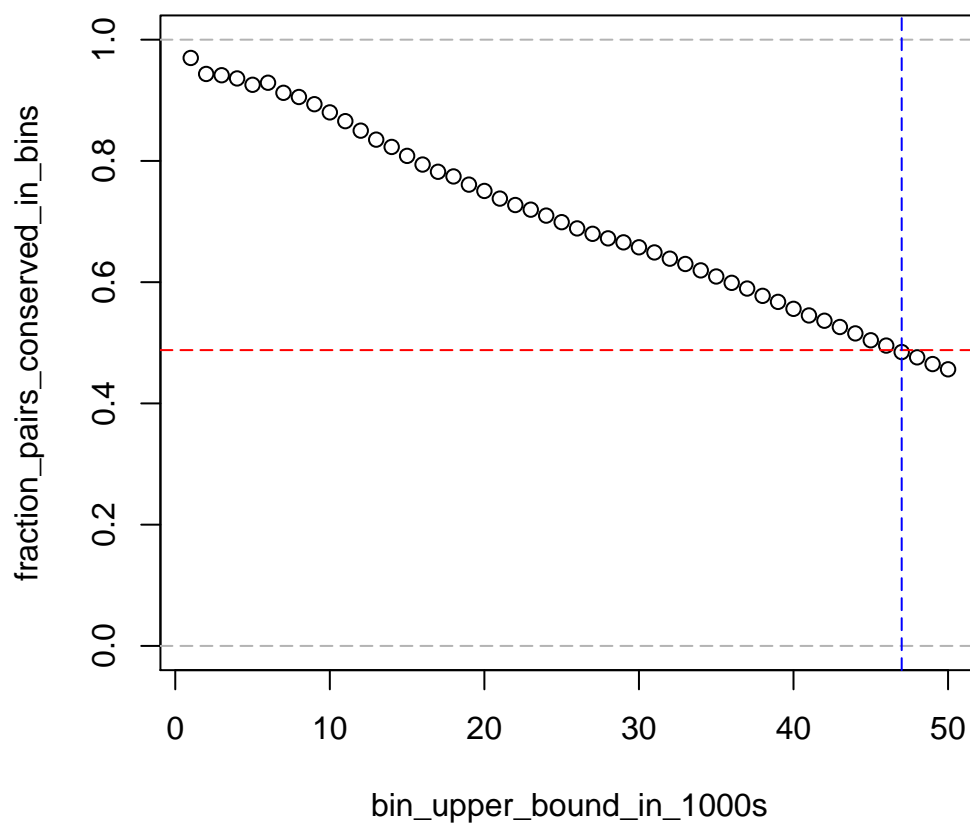

Supplement: s1 [file s1]

**Bin\_conservation\_minus\_bg\_NE-JV-2\_vs\_NY2A**  
**PD-0.70985**

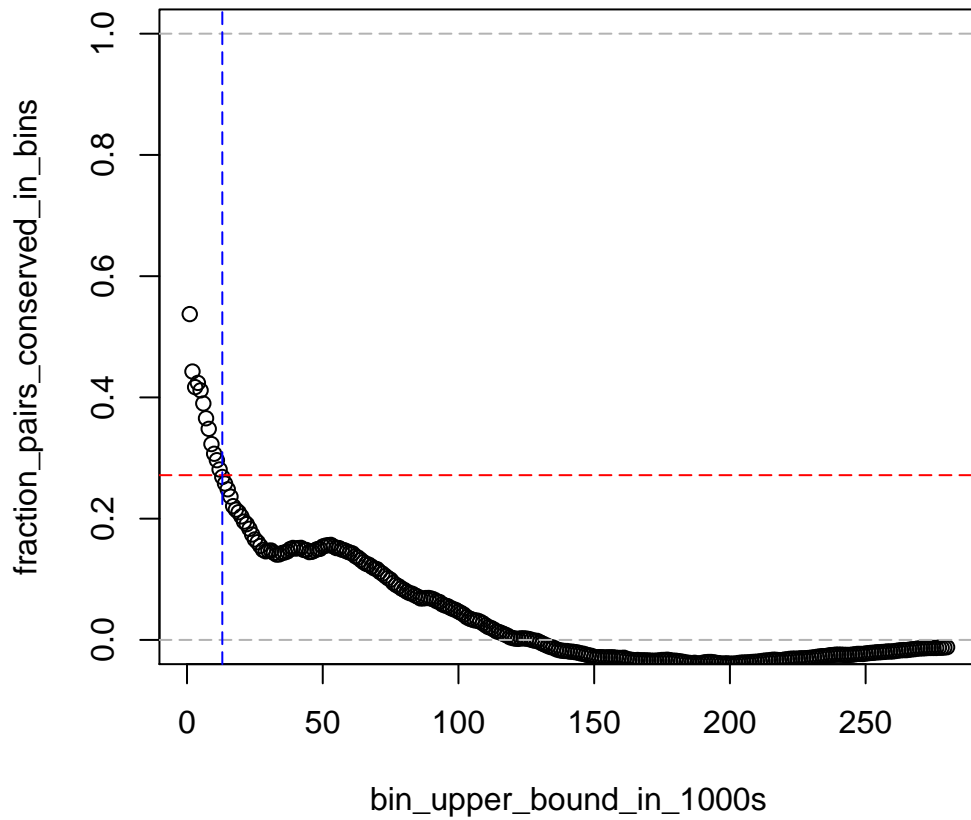

**Bin\_conservation\_minus\_bg\_NE-JV-2\_vs\_NY2A**  
**PD-0.70985**

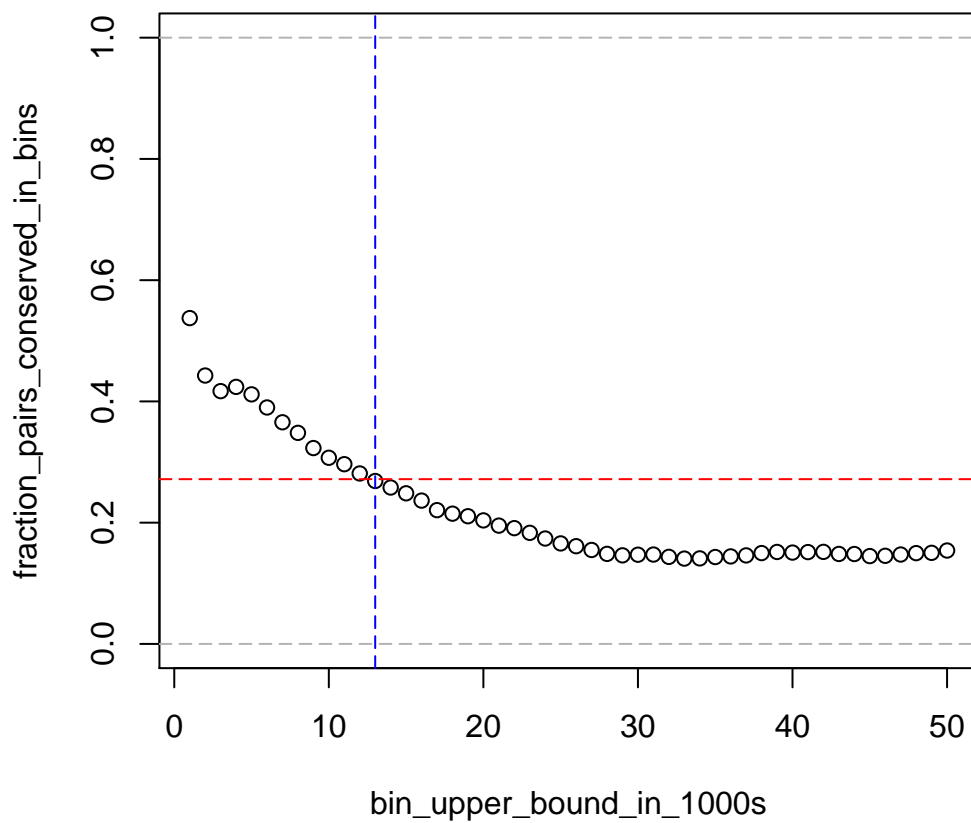

Supplement: s1 [file s1]

**Bin\_conservation\_minus\_bg\_CvsA1\_vs\_NY2A**  
**PD-0.155215**

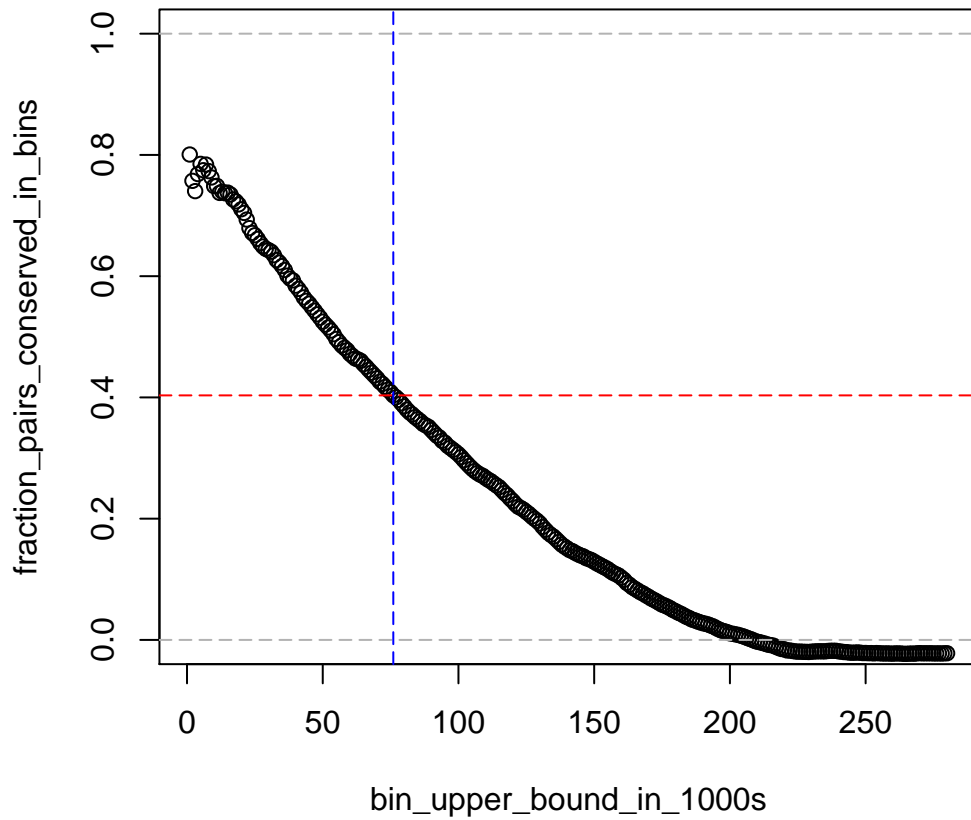

**Bin\_conservation\_minus\_bg\_CvsA1\_vs\_NY2A**  
**PD-0.155215**

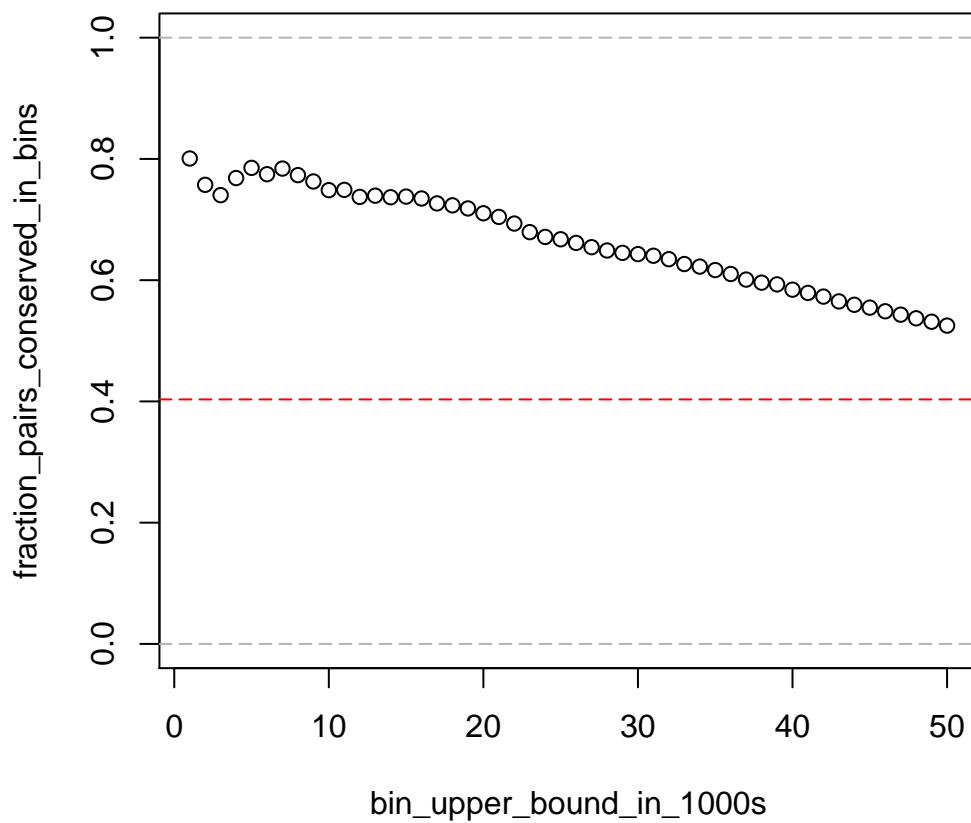

Supplement: s1 [file s1]

**Bin\_conservation\_minus\_bg\_CviKI\_vs\_CZ-2**  
**PD-0.656502**

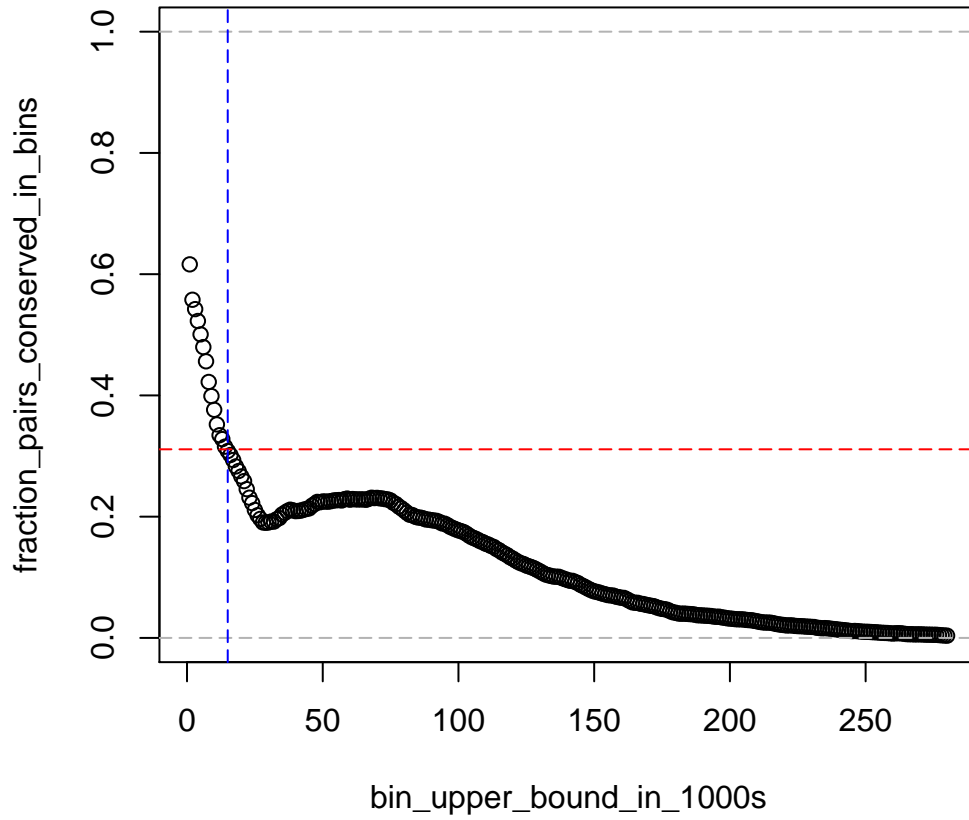

**Bin\_conservation\_minus\_bg\_CviKI\_vs\_CZ-2**  
**PD-0.656502**

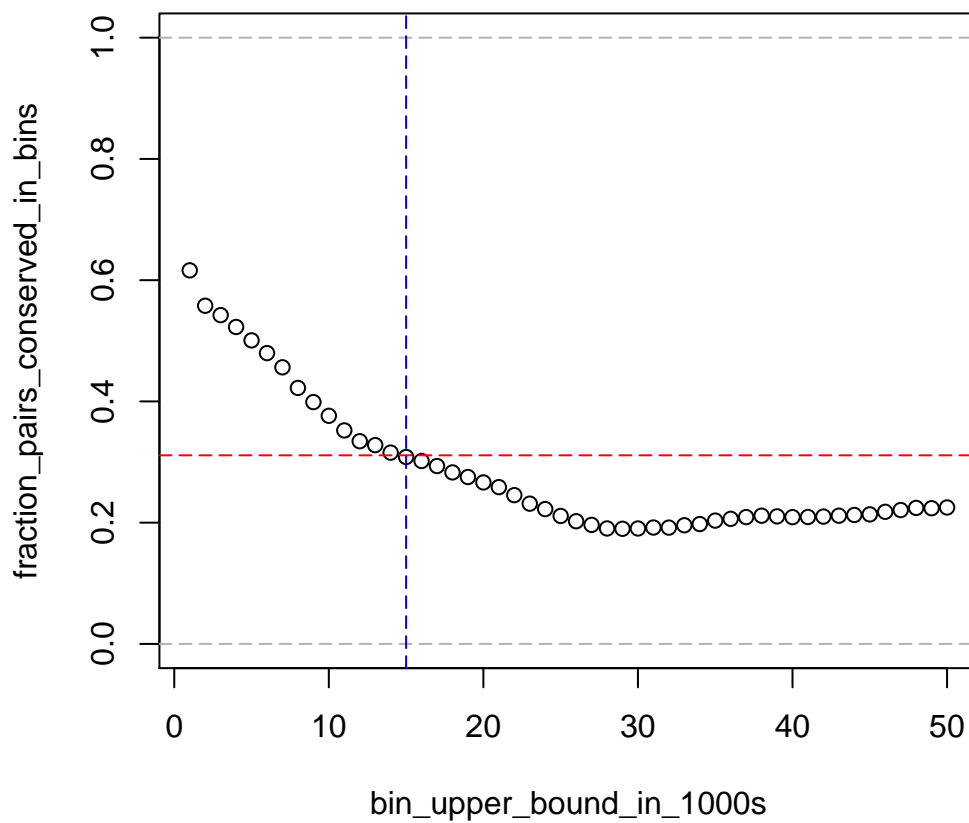

Supplement: s1 [file s1]

**Bin\_conservation\_minus\_bg\_AR158\_vs\_CVB-1**  
**PD-0.679202**

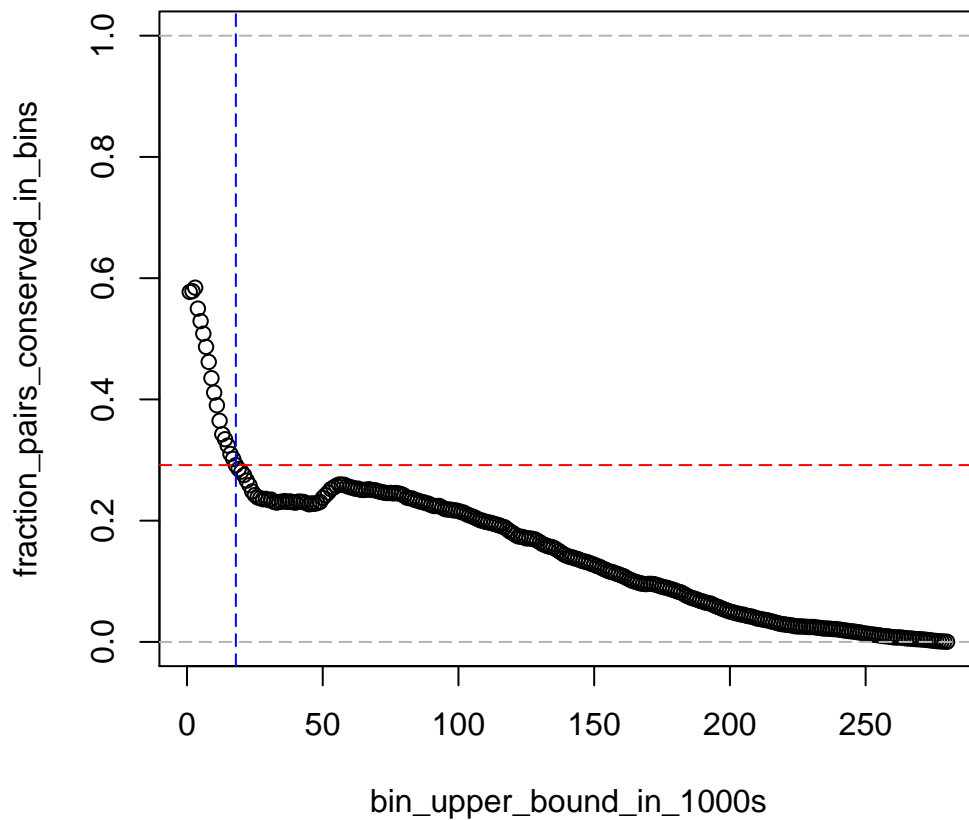

**Bin\_conservation\_minus\_bg\_AR158\_vs\_CVB-1**  
**PD-0.679202**

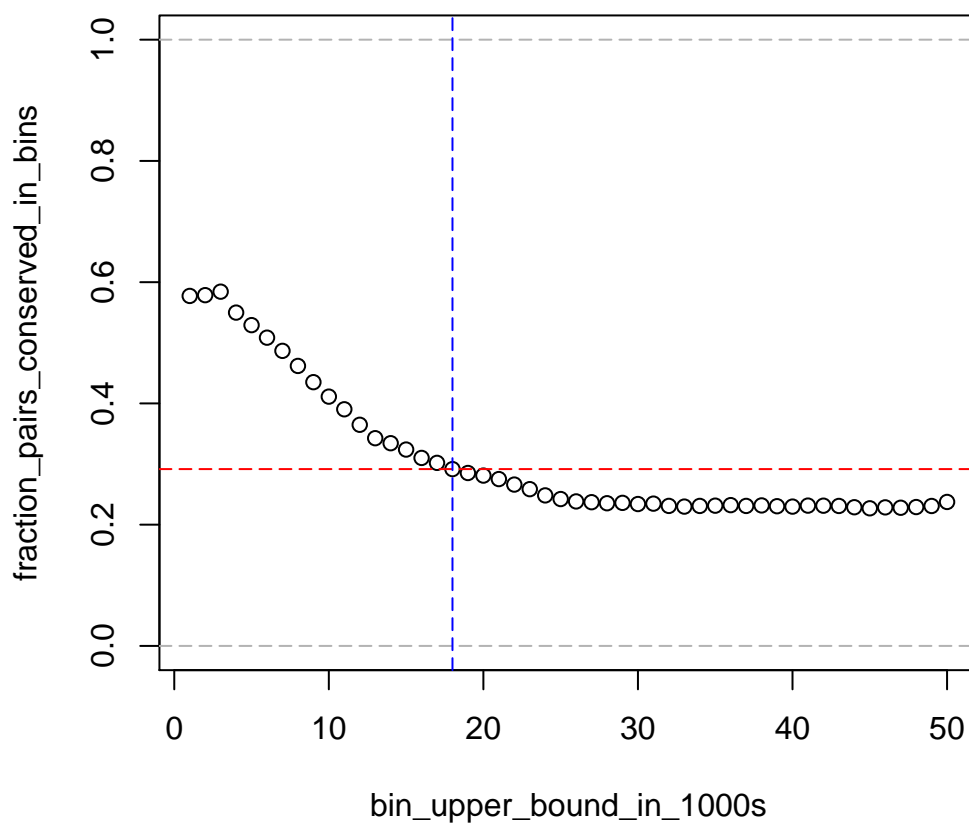

Supplement: s1 [file s1]

**Bin\_conservation\_minus\_bg\_MA-1E\_vs\_MN0810.1**  
**PD-0.692416**

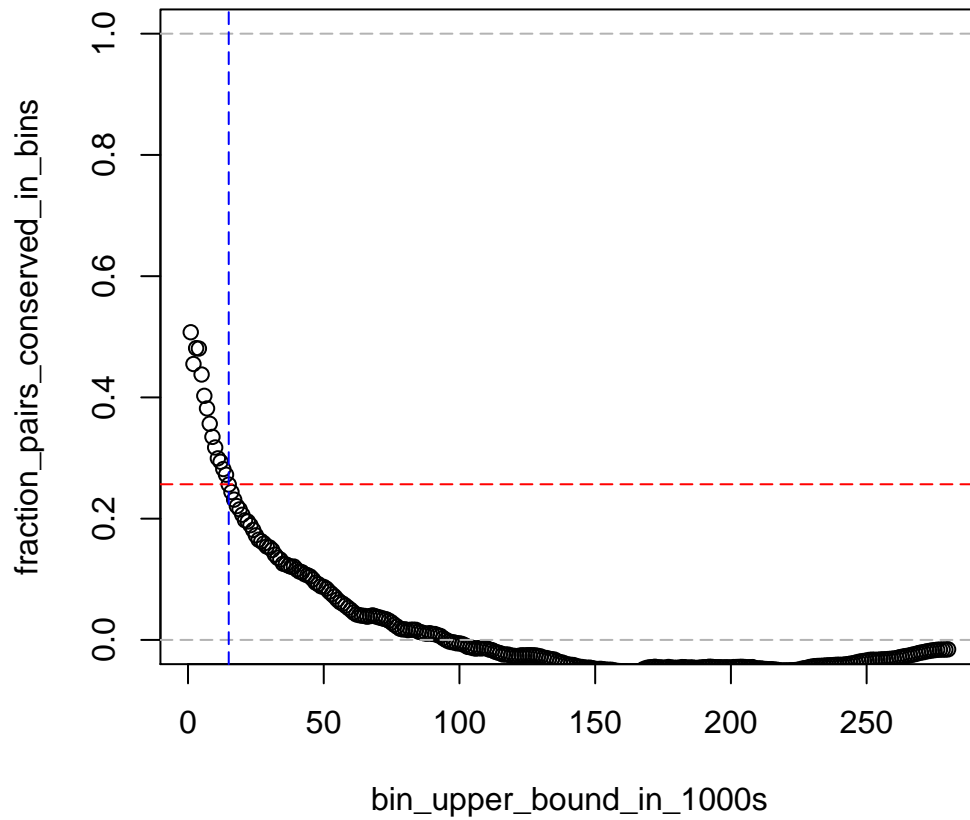

**Bin\_conservation\_minus\_bg\_MA-1E\_vs\_MN0810.1**  
**PD-0.692416**

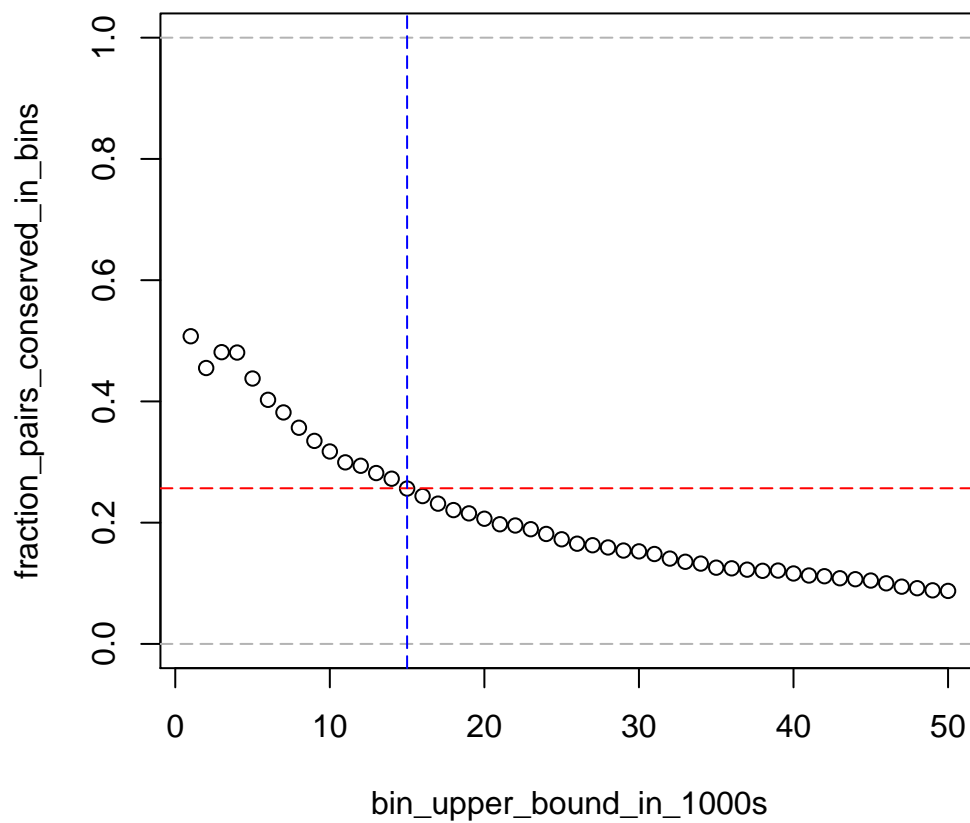

Supplement: s1 [file s1]

**Bin\_conservation\_minus\_bg\_AR158\_vs\_PBCV1**  
**PD-0.13285**

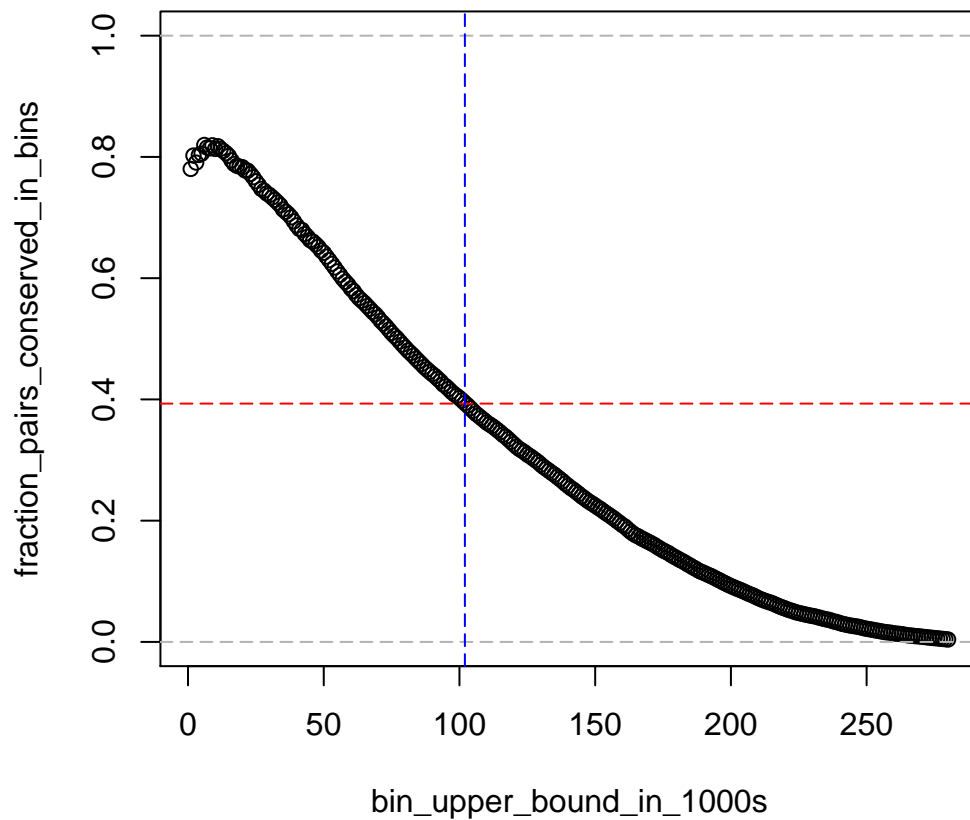

**Bin\_conservation\_minus\_bg\_AR158\_vs\_PBCV1**  
**PD-0.13285**

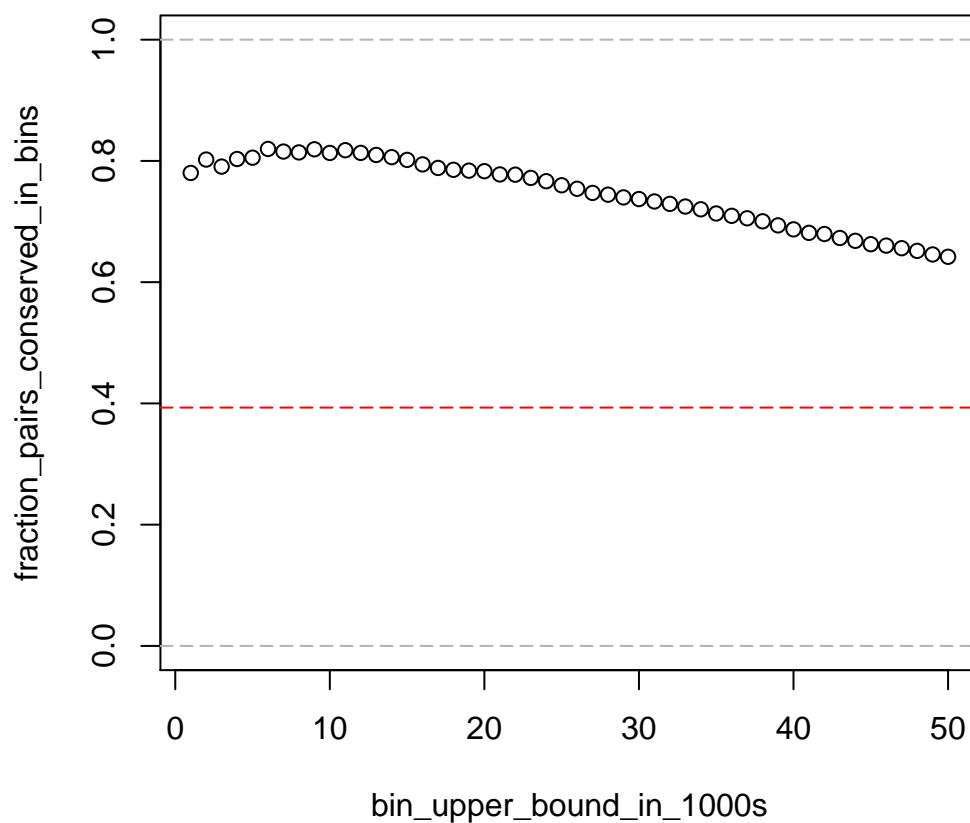

Supplement: s1 [file s1]

**Bin\_conservation\_minus\_bg\_Fr5L\_vs\_NYs-1**  
**PD-0.659777**

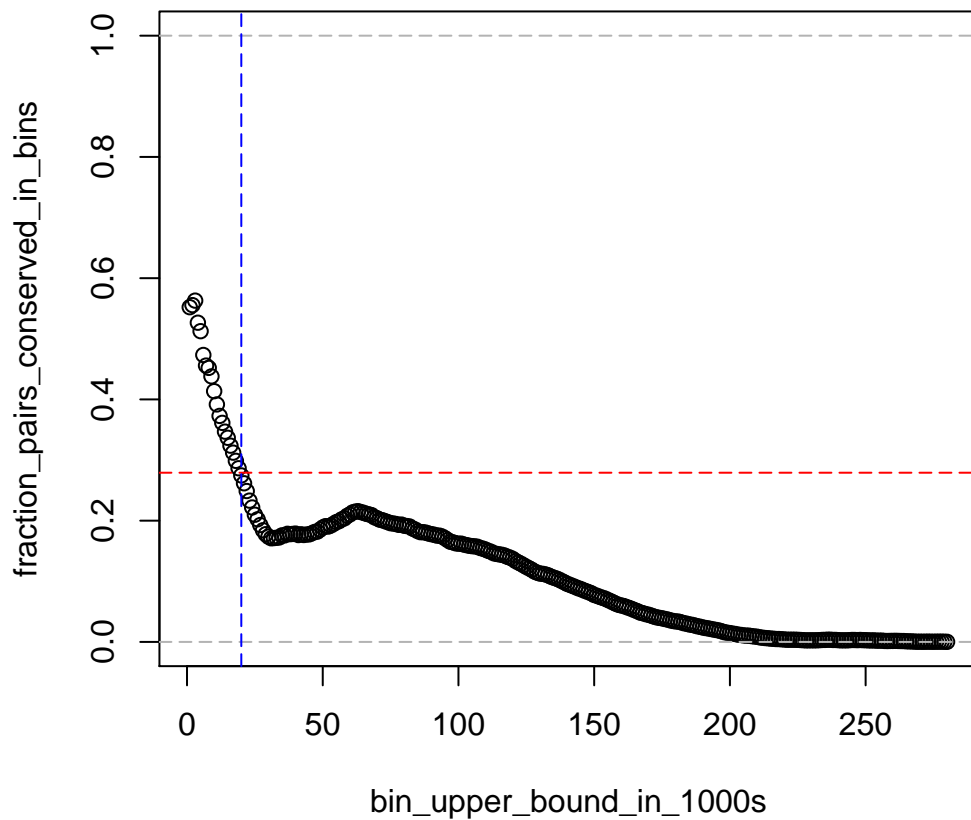

**Bin\_conservation\_minus\_bg\_Fr5L\_vs\_NYs-1**  
**PD-0.659777**

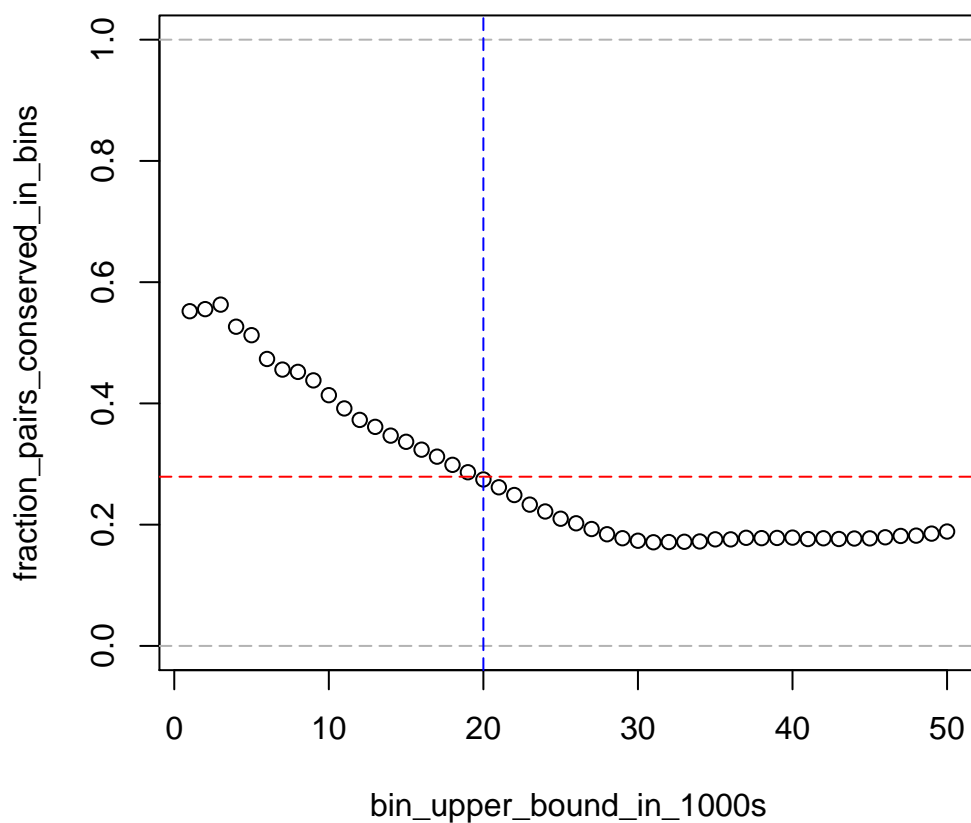

Supplement: s1 [file s1]

**Bin\_conservation\_minus\_bg\_CVM-1\_vs\_PBCV1**  
**PD-0.634045**

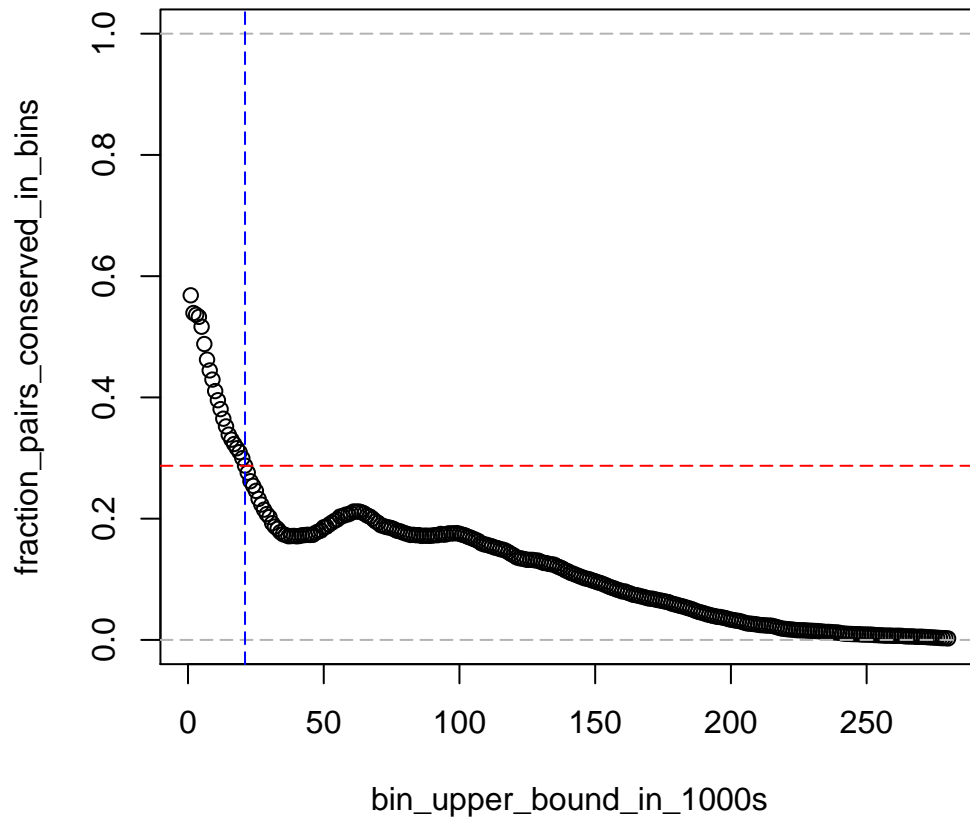

**Bin\_conservation\_minus\_bg\_CVM-1\_vs\_PBCV1**  
**PD-0.634045**

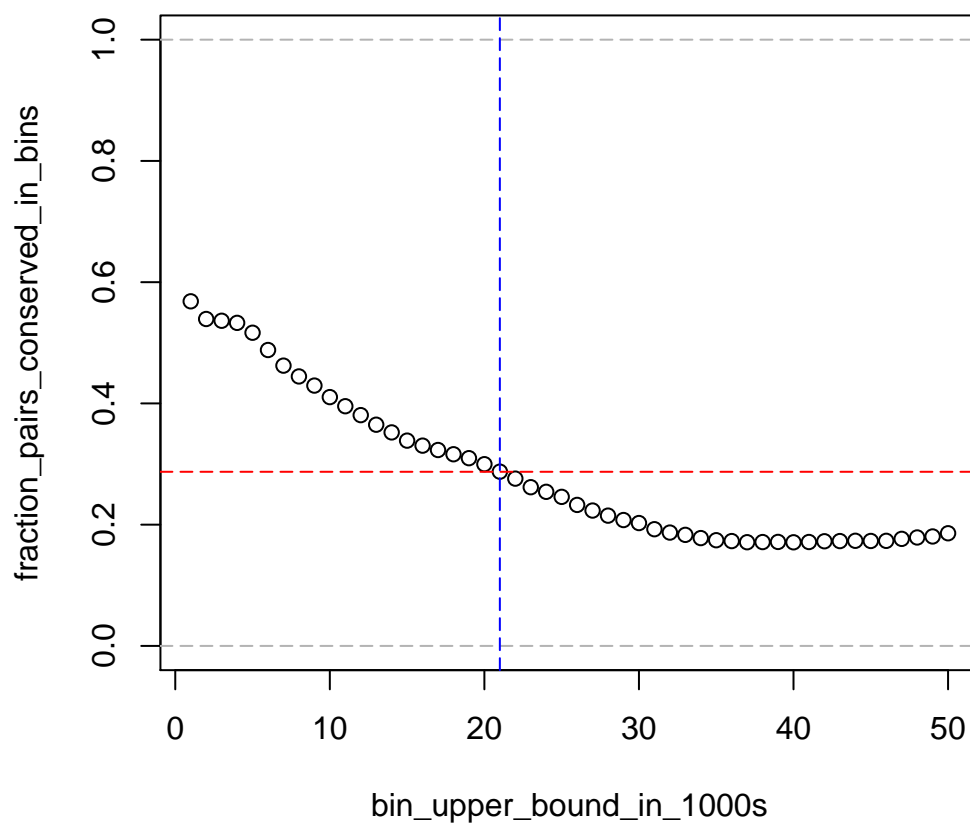

Supplement: s1 [file s1]
