# Supplementary figures and images for: Gene Gangs of the Chloroviruses: Conserved Clusters of Collinear Monocistronic Genes (part 4 of 9)
Source: MDPI journal article supplement (doi:10.3390/v10100576), 2018-10-20

**Bin\_conservation\_minus\_bg\_MN0810.1\_vs\_NW665.2**  
**PD-0.460966**

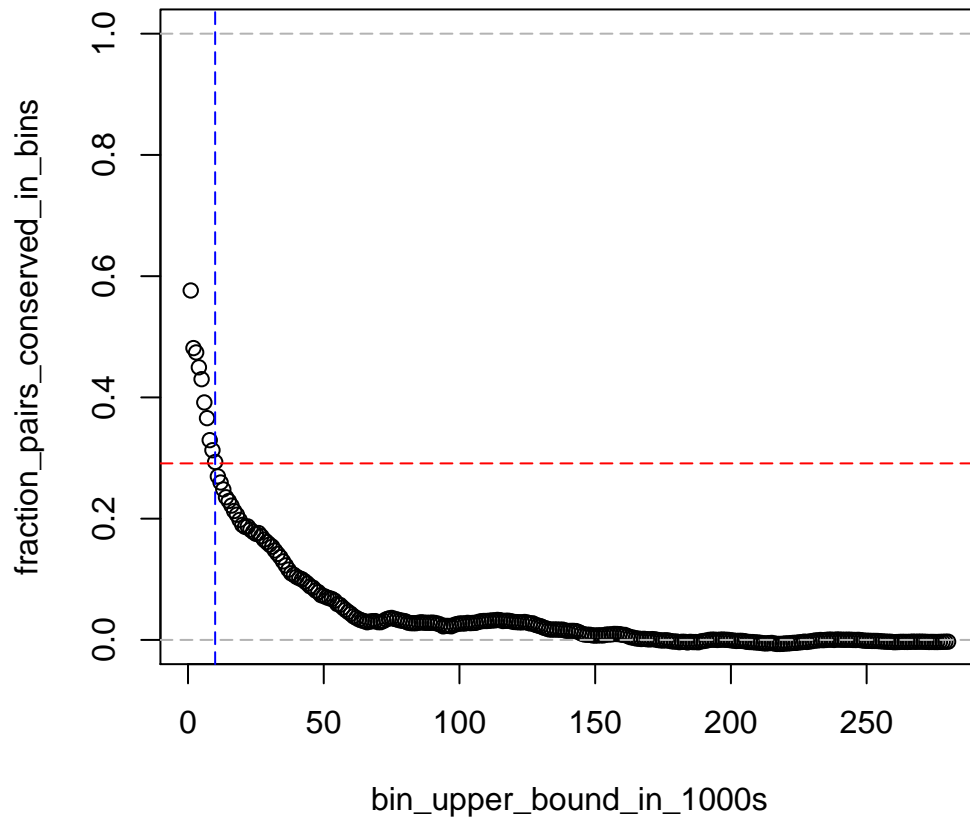

**Bin\_conservation\_minus\_bg\_MN0810.1\_vs\_NW665.2**  
**PD-0.460966**

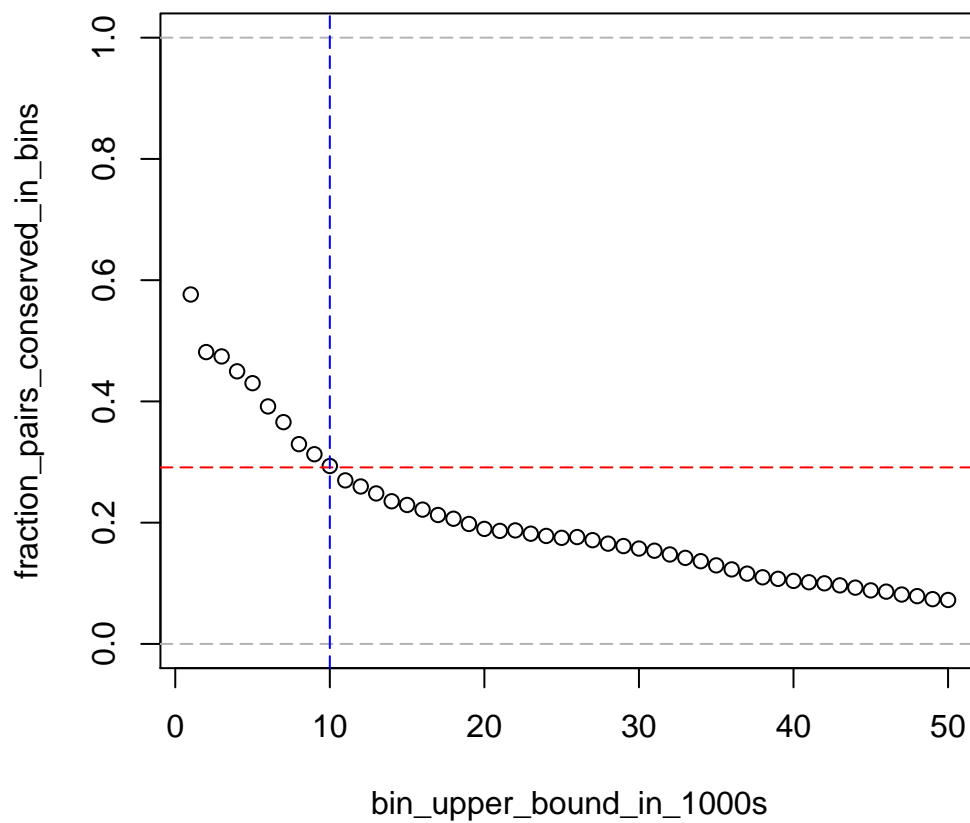

Supplement: s1 [file s1]

**Bin\_conservation\_minus\_bg\_ATCV1\_vs\_MN0810.1**  
**PD-0.11033**

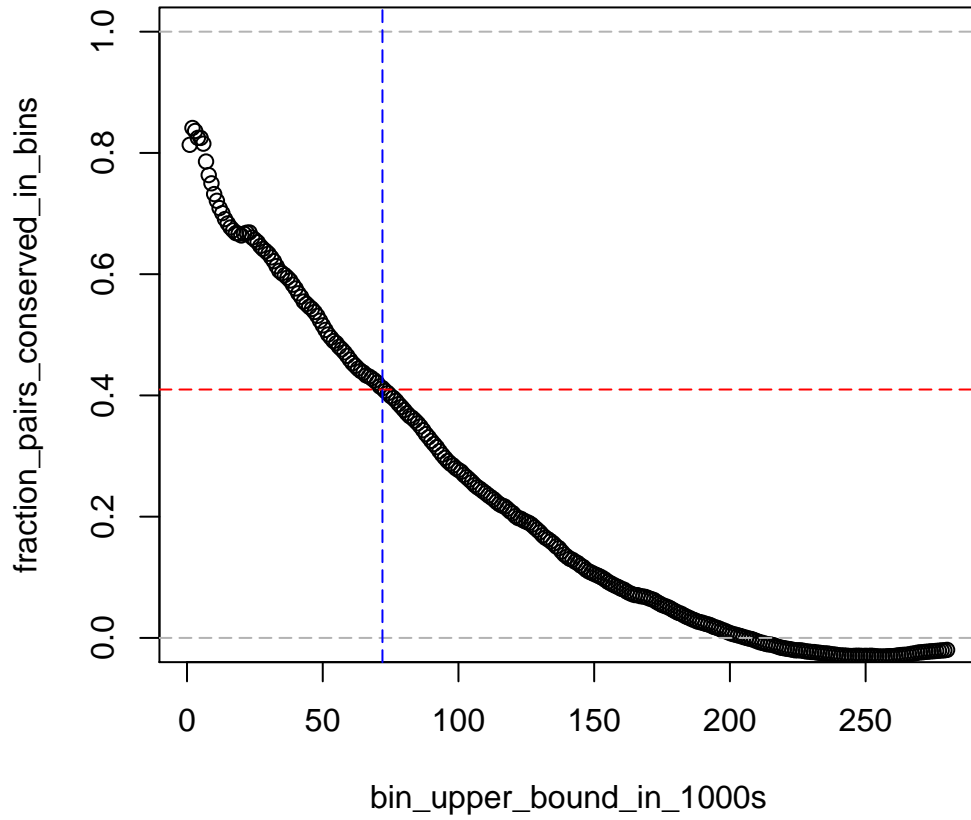

**Bin\_conservation\_minus\_bg\_ATCV1\_vs\_MN0810.1**  
**PD-0.11033**

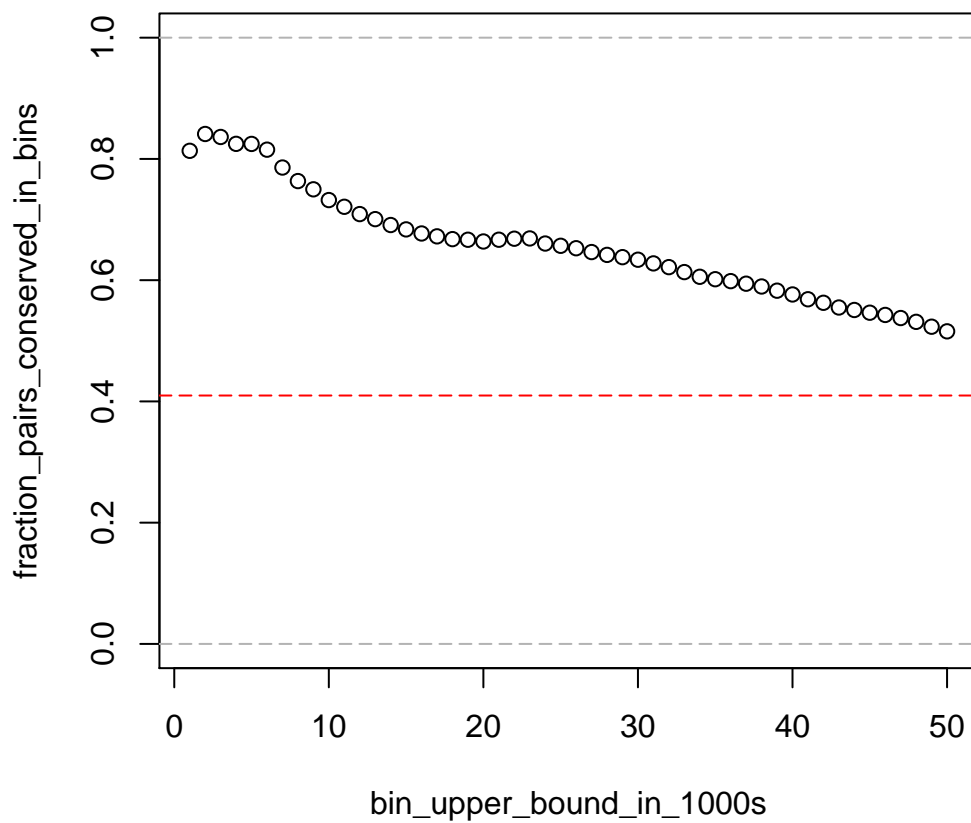

Supplement: s1 [file s1]

**Bin\_conservation\_minus\_bg\_AP110A\_vs\_CVM-1**  
**PD-0.014366**

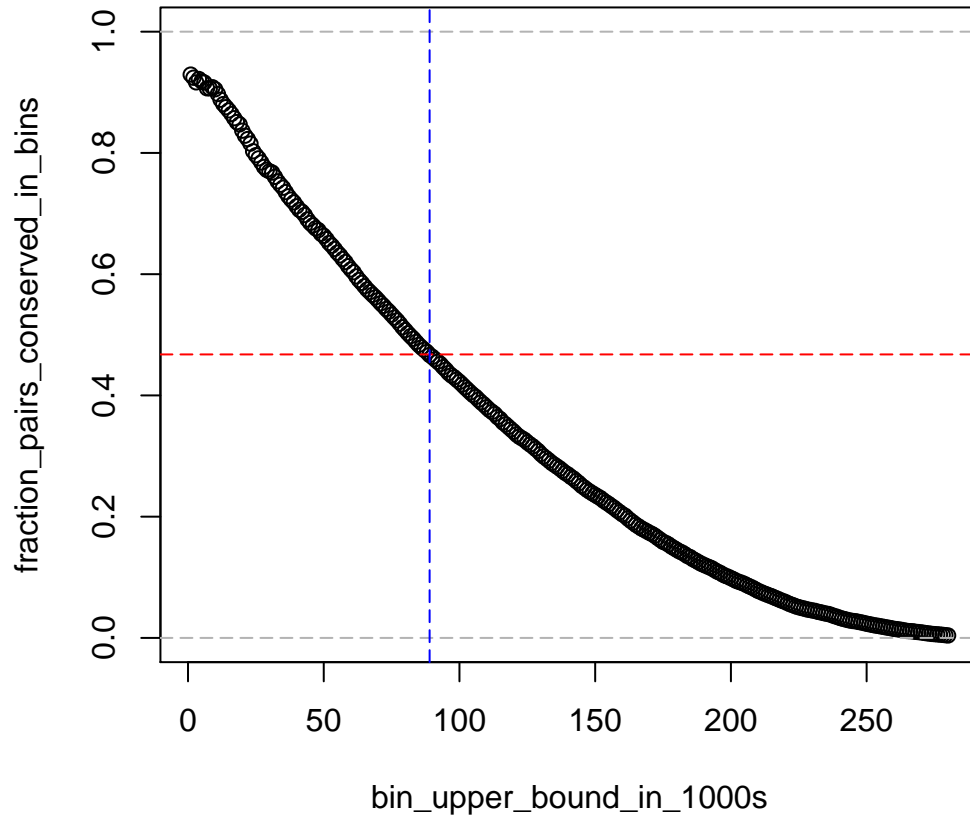

**Bin\_conservation\_minus\_bg\_AP110A\_vs\_CVM-1**  
**PD-0.014366**

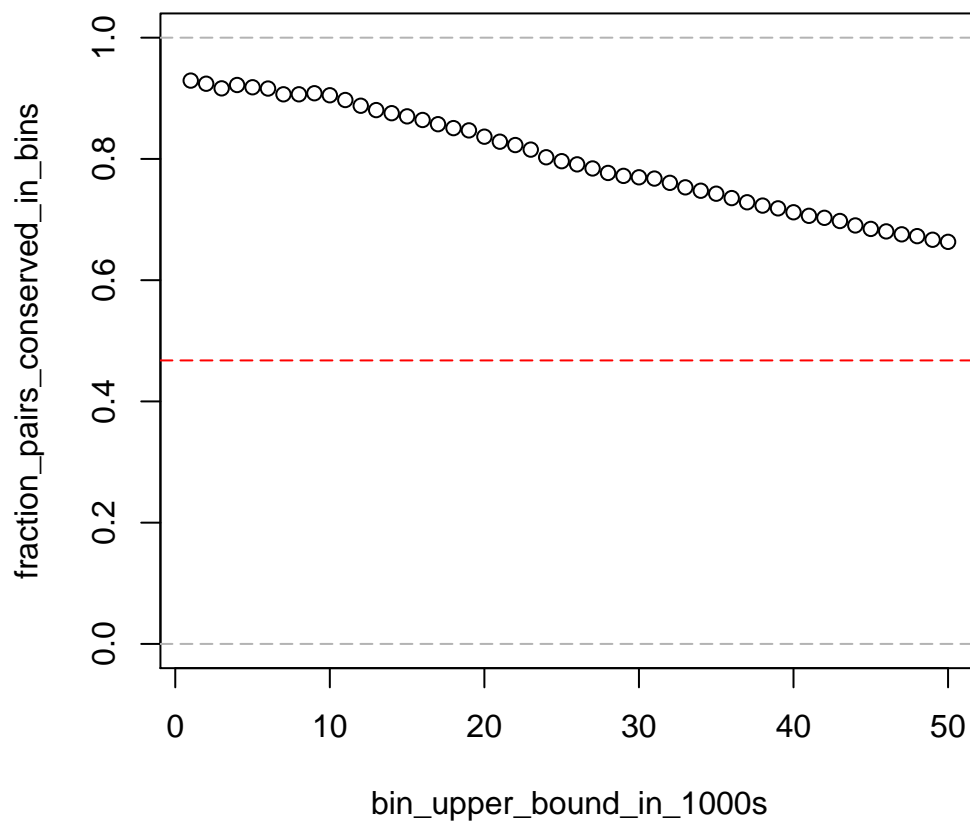

Supplement: s1 [file s1]

**Bin\_conservation\_minus\_bg\_Canal-1\_vs\_CVA-1**  
**PD-0.458215**

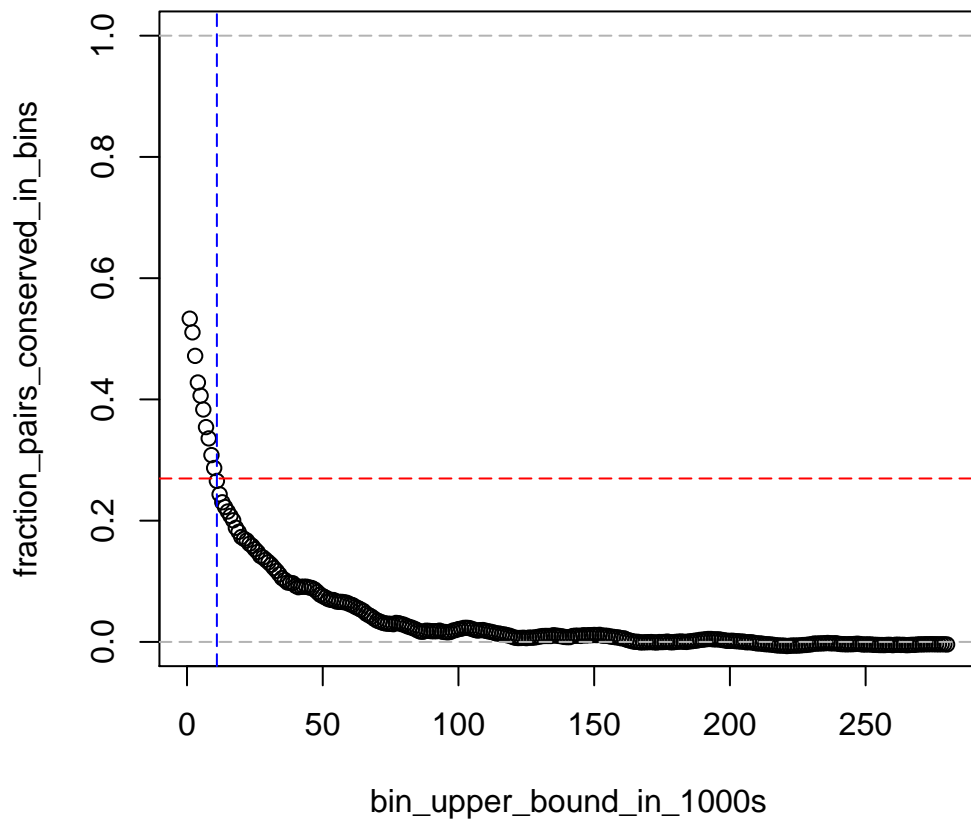

**Bin\_conservation\_minus\_bg\_Canal-1\_vs\_CVA-1**  
**PD-0.458215**

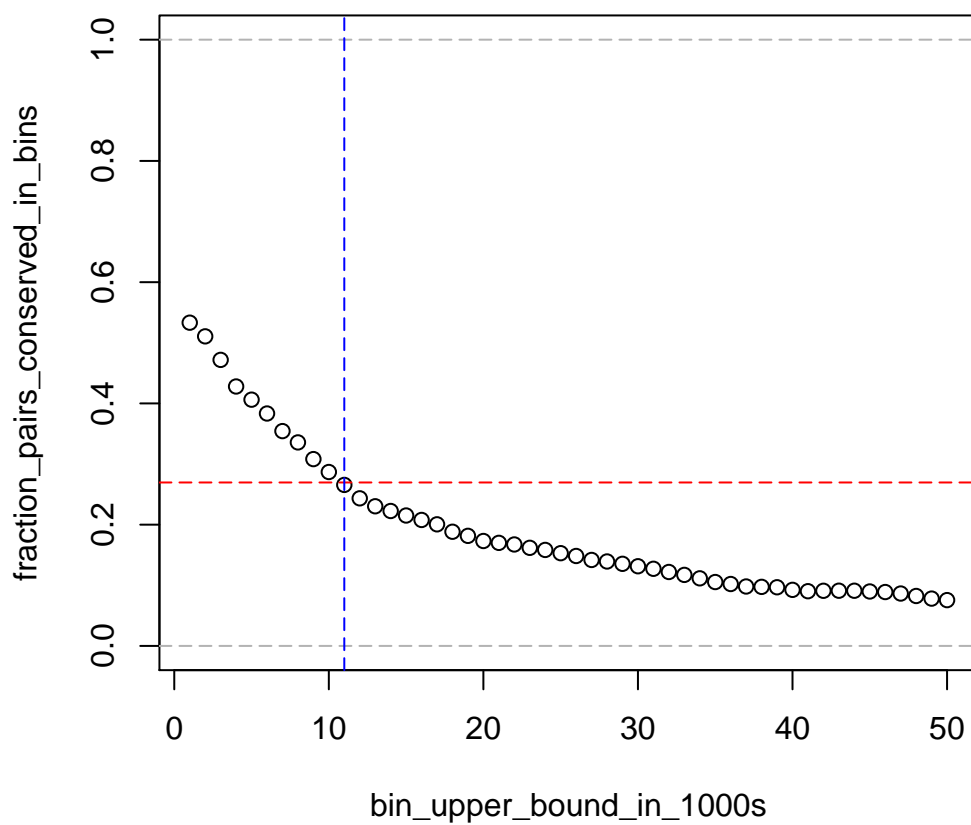

Supplement: s1 [file s1]

**Bin\_conservation\_minus\_bg\_Fr5L\_vs\_MN0810.1**  
**PD-0.456956**

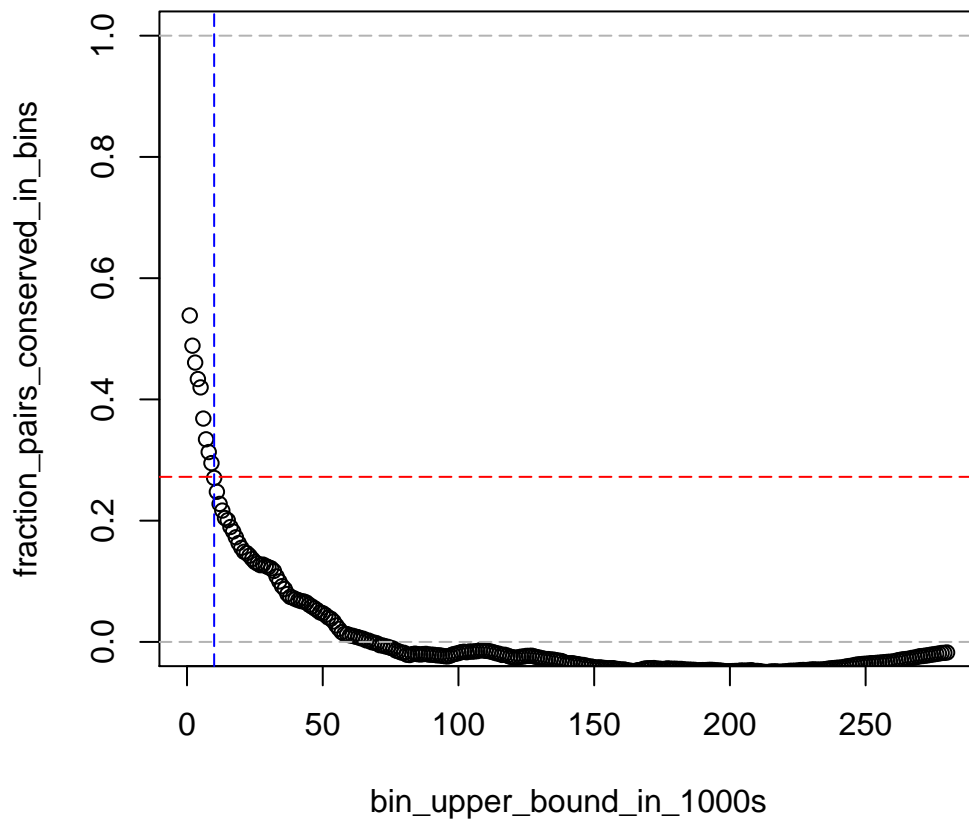

**Bin\_conservation\_minus\_bg\_Fr5L\_vs\_MN0810.1**  
**PD-0.456956**

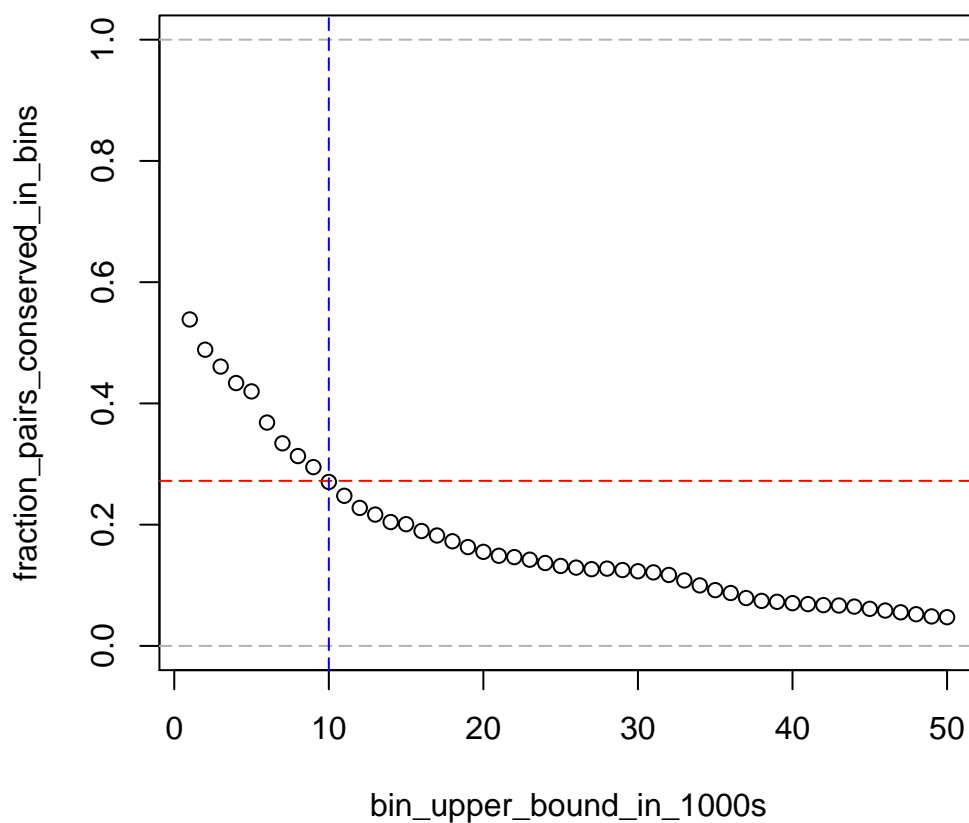

Supplement: s1 [file s1]

**Bin\_conservation\_minus\_bg\_MN0810.1\_vs\_NTS-1**  
**PD-0.105943**

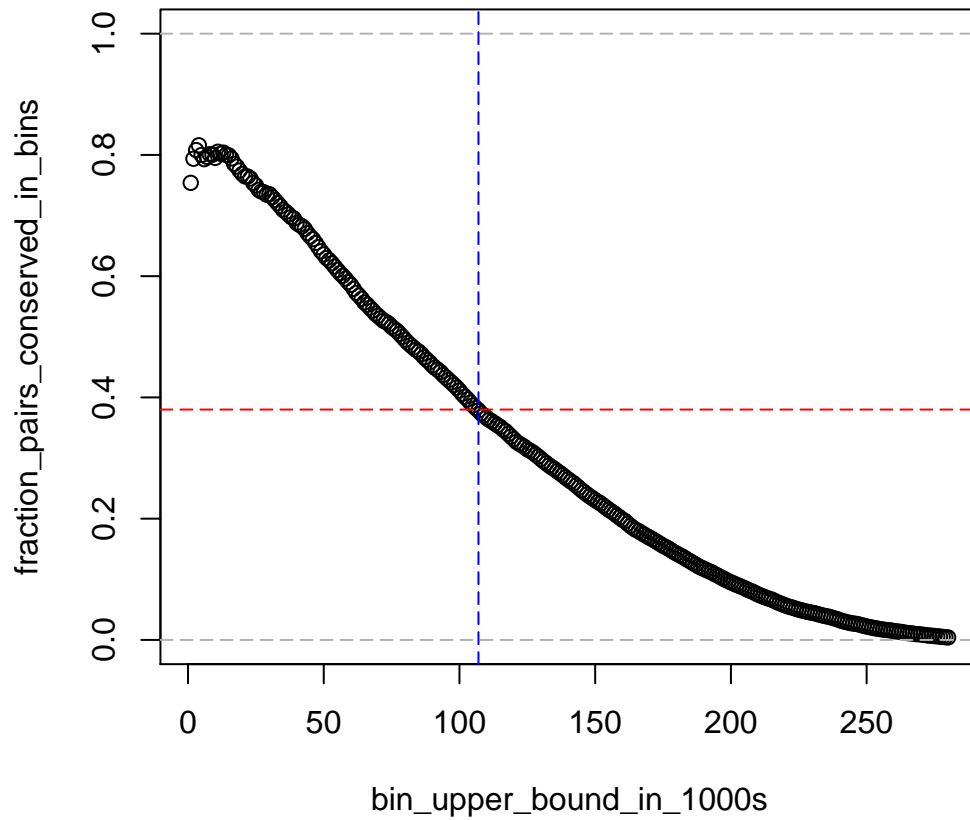

**Bin\_conservation\_minus\_bg\_MN0810.1\_vs\_NTS-1**  
**PD-0.105943**

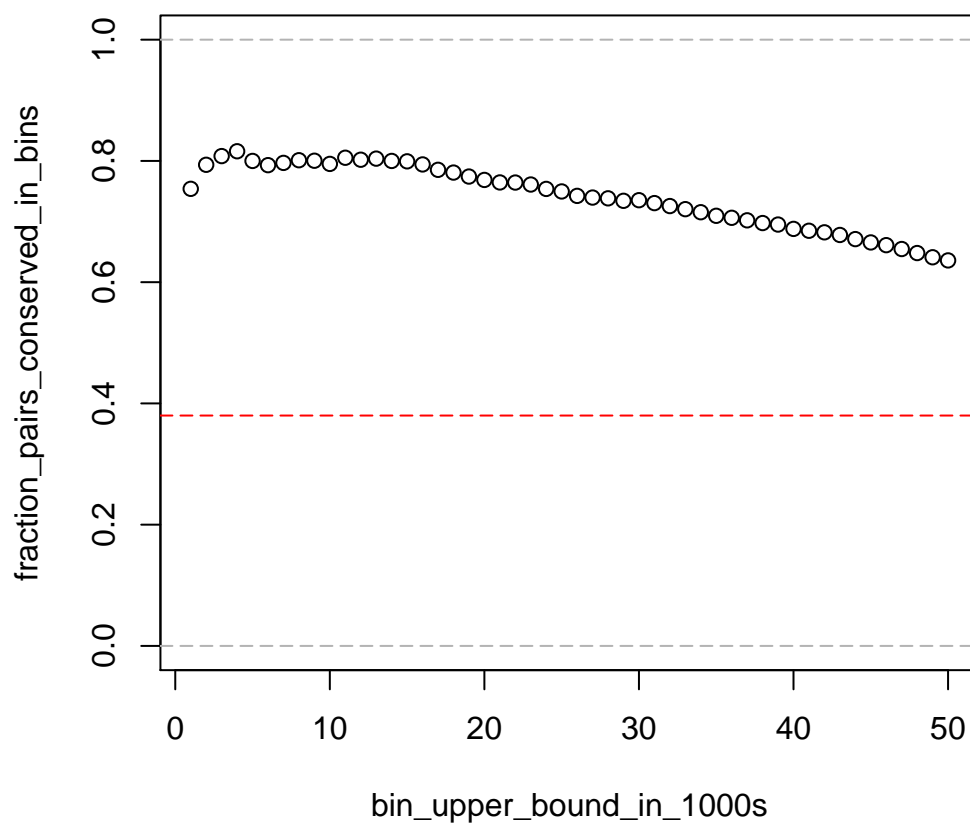

Supplement: s1 [file s1]

**Bin\_conservation\_minus\_bg\_NTS-1\_vs\_NY2A**  
**PD-0.704874**

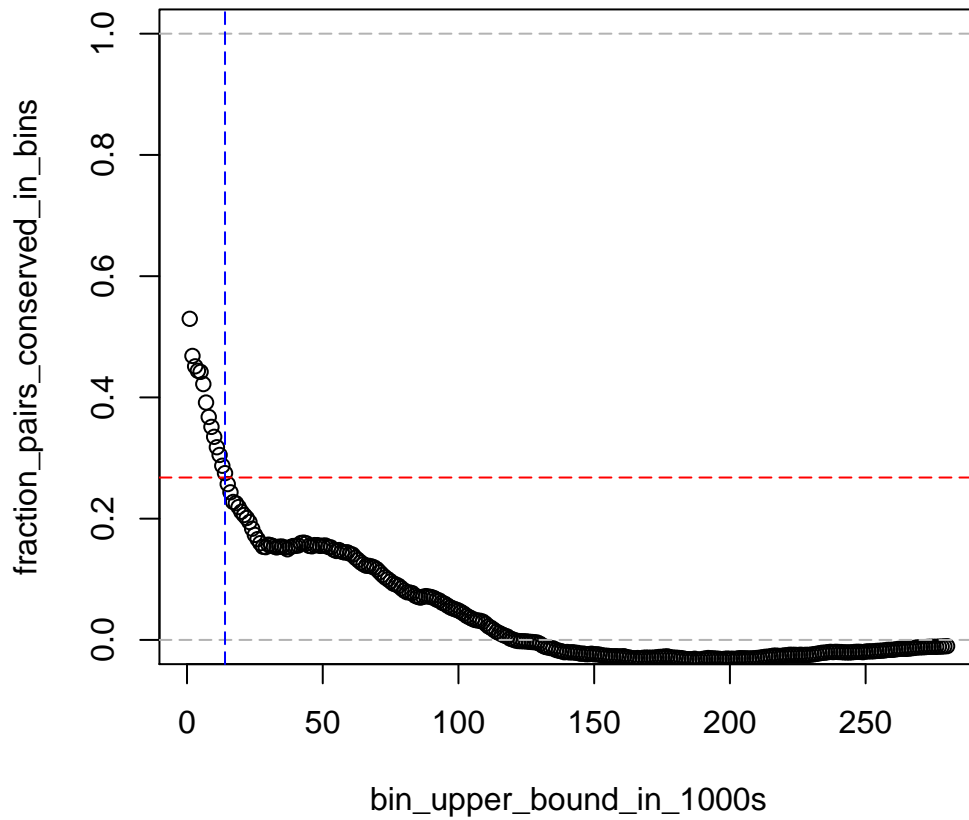

**Bin\_conservation\_minus\_bg\_NTS-1\_vs\_NY2A**  
**PD-0.704874**

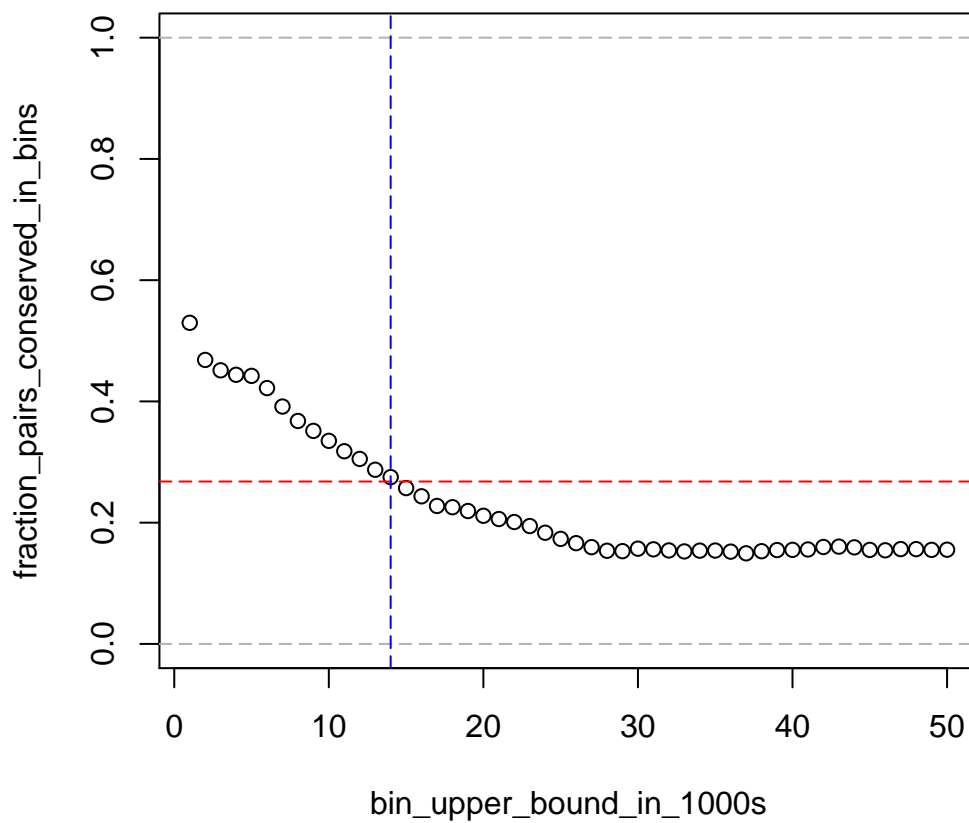

Supplement: s1 [file s1]

**Bin\_conservation\_minus\_bg\_NE-JV-3\_vs\_PBCV1**  
**PD-0.677343**

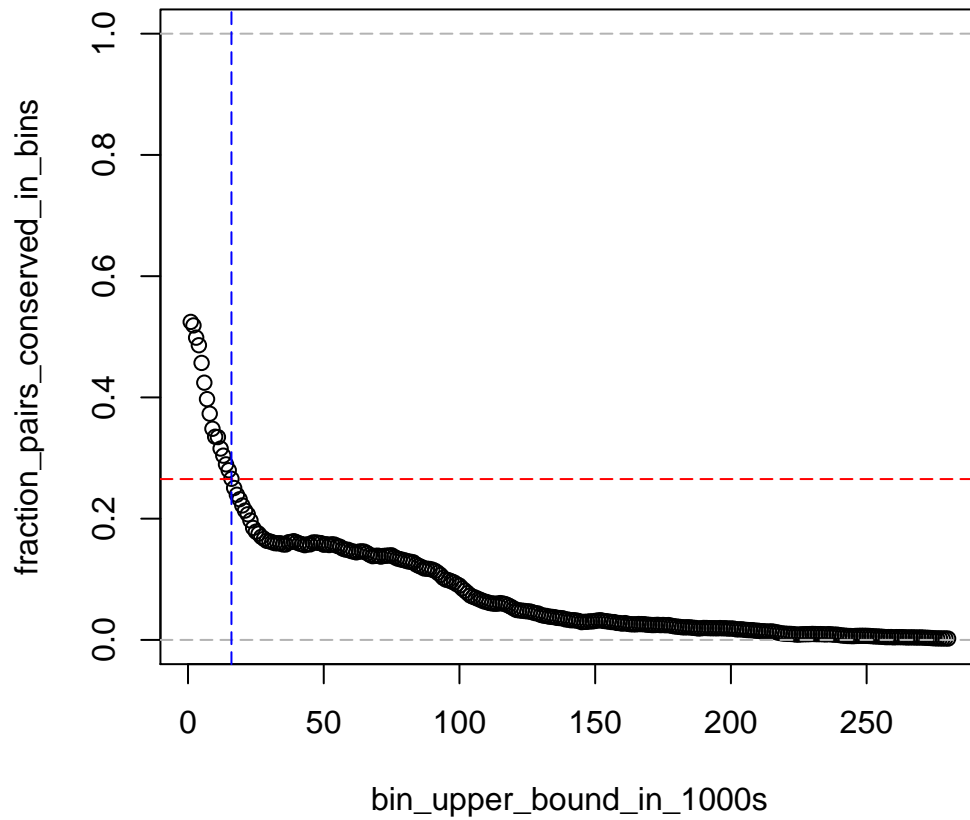

**Bin\_conservation\_minus\_bg\_NE-JV-3\_vs\_PBCV1**  
**PD-0.677343**

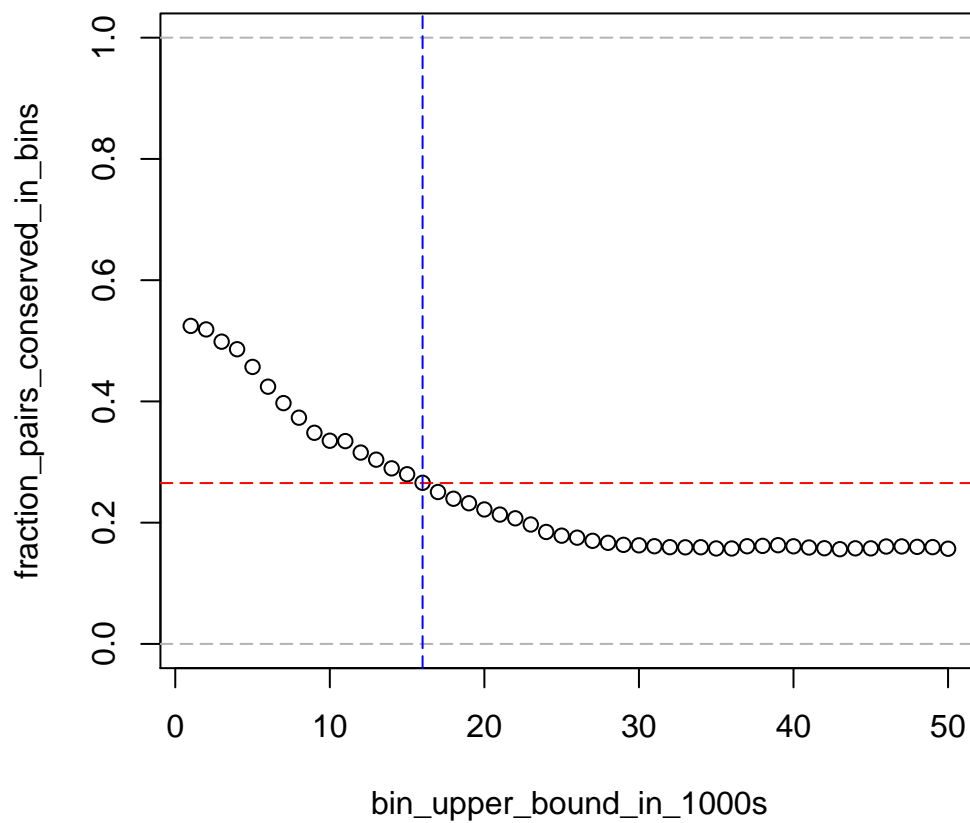

Supplement: s1 [file s1]

**Bin\_conservation\_minus\_bg\_ATCV1\_vs\_MA-1E**  
**PD-0.69403**

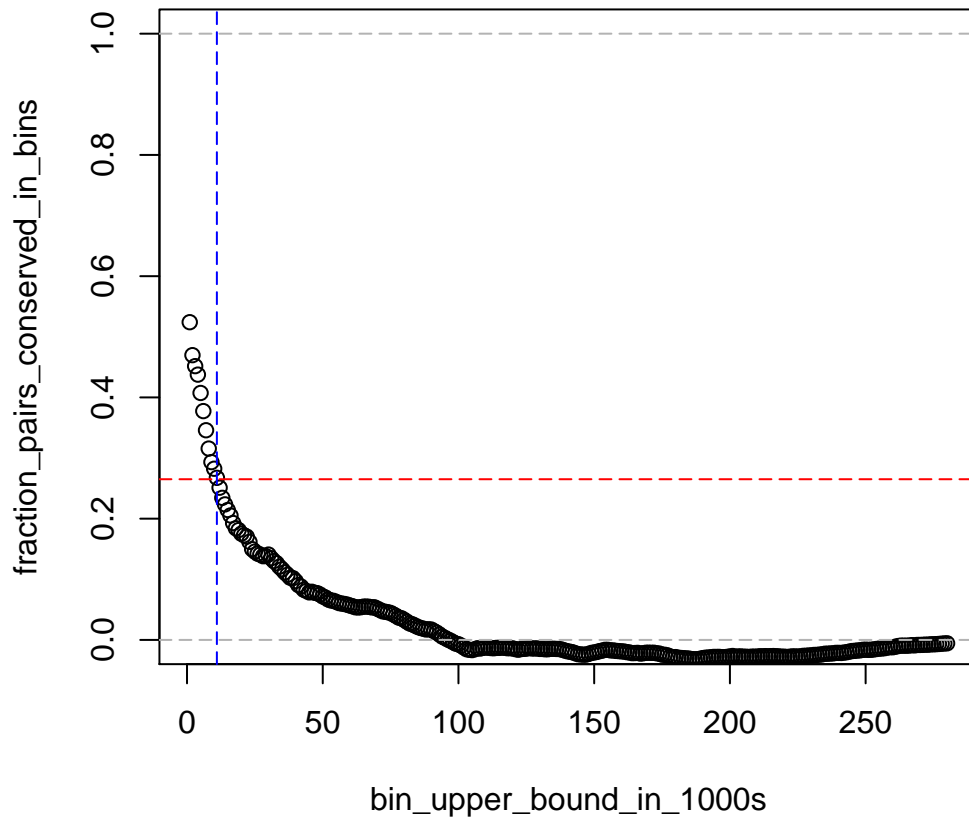

**Bin\_conservation\_minus\_bg\_ATCV1\_vs\_MA-1E**  
**PD-0.69403**

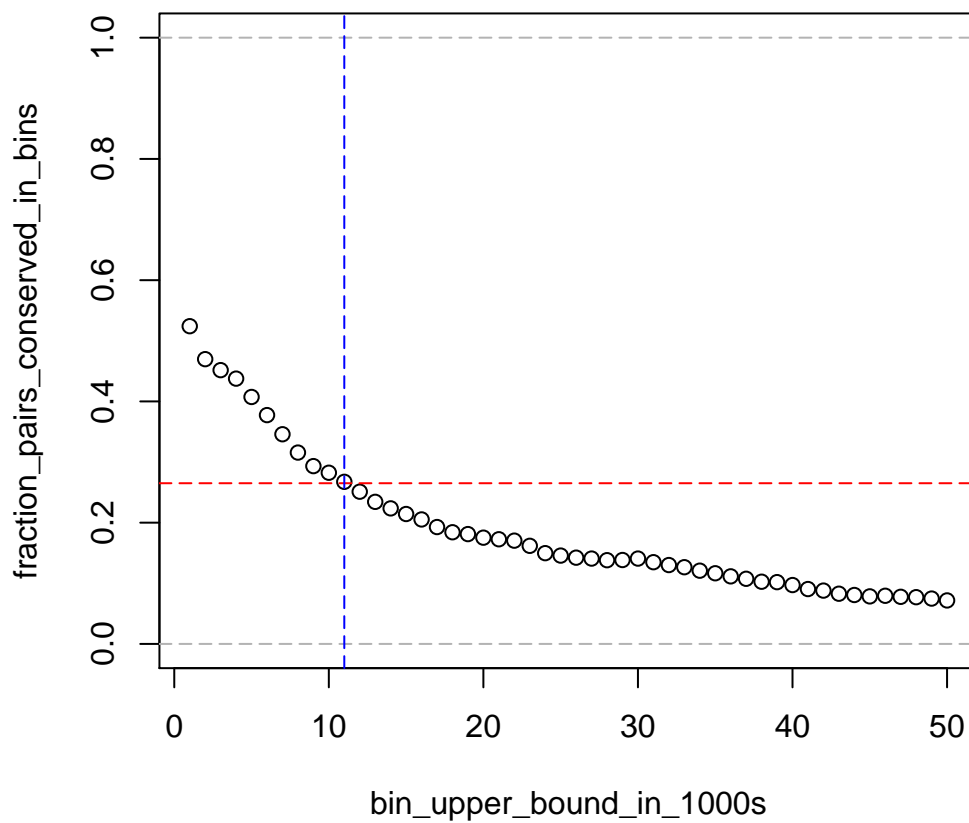

Supplement: s1 [file s1]

**Bin\_conservation\_minus\_bg\_KS1B\_vs\_NY2A**  
**PD-0.153975**

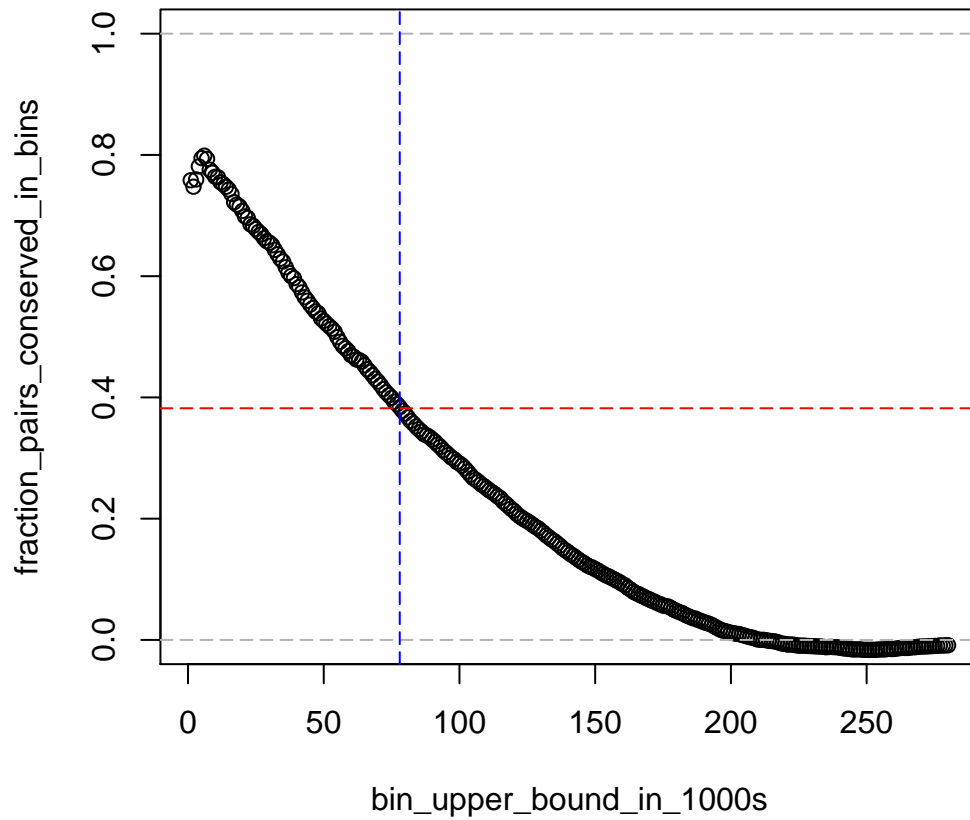

**Bin\_conservation\_minus\_bg\_KS1B\_vs\_NY2A**  
**PD-0.153975**

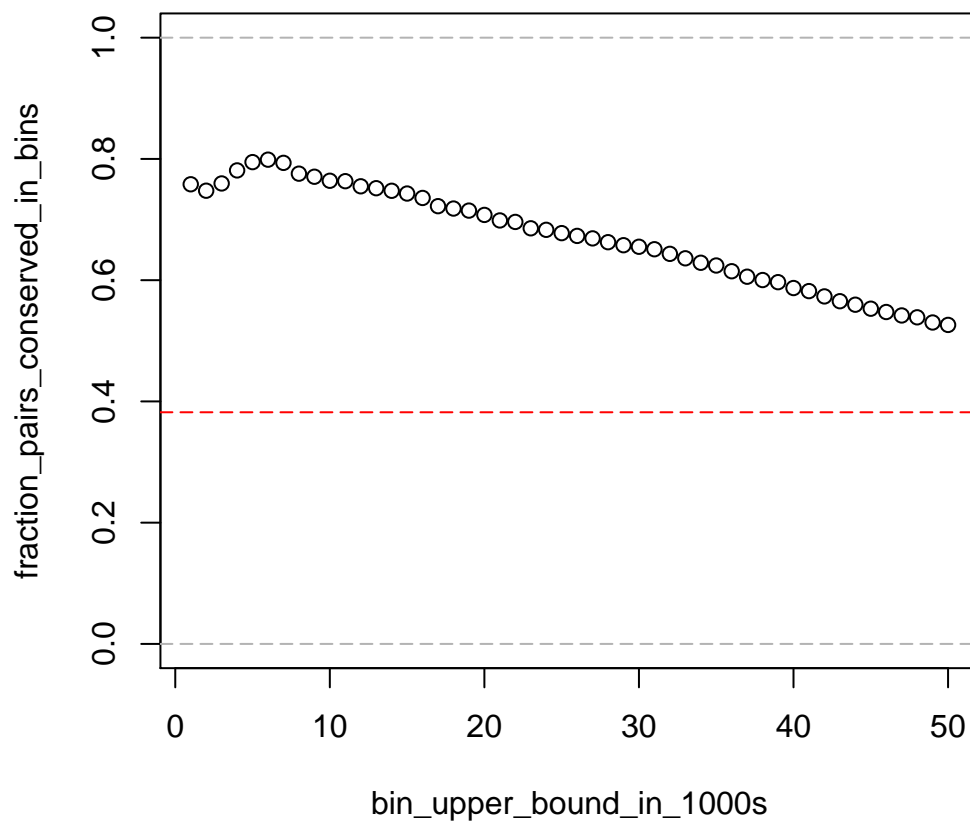

Supplement: s1 [file s1]

**Bin\_conservation\_minus\_bg\_CvsA1\_vs\_IL-3A**  
**PD-0.014676**

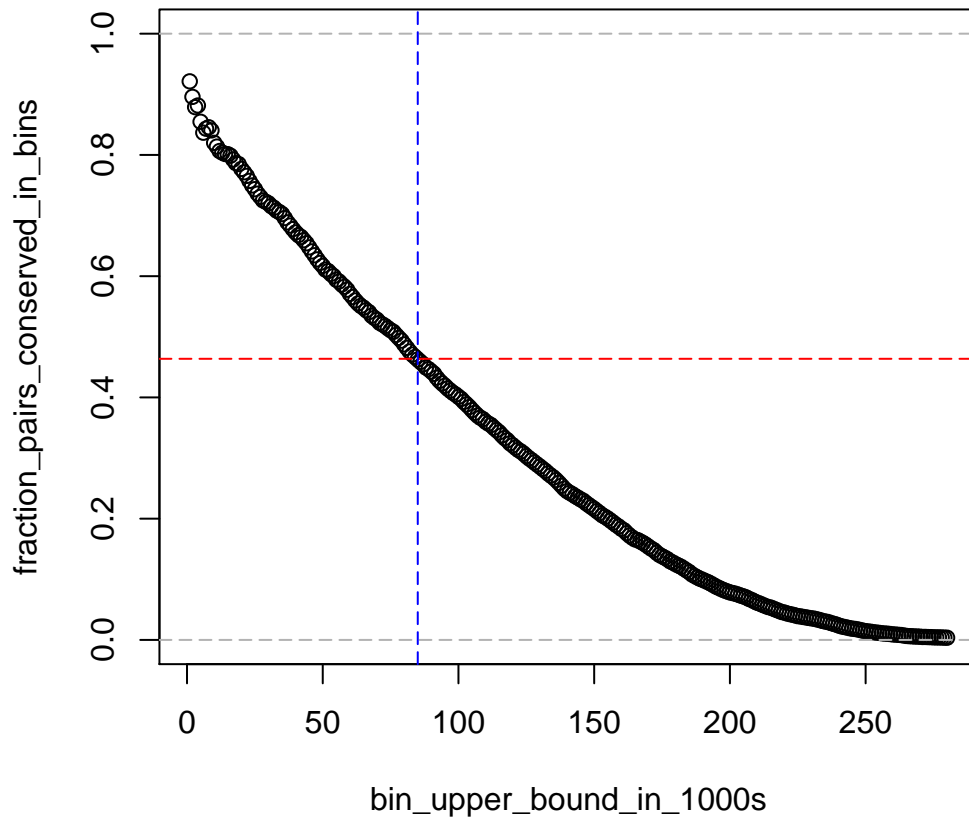

**Bin\_conservation\_minus\_bg\_CvsA1\_vs\_IL-3A**  
**PD-0.014676**

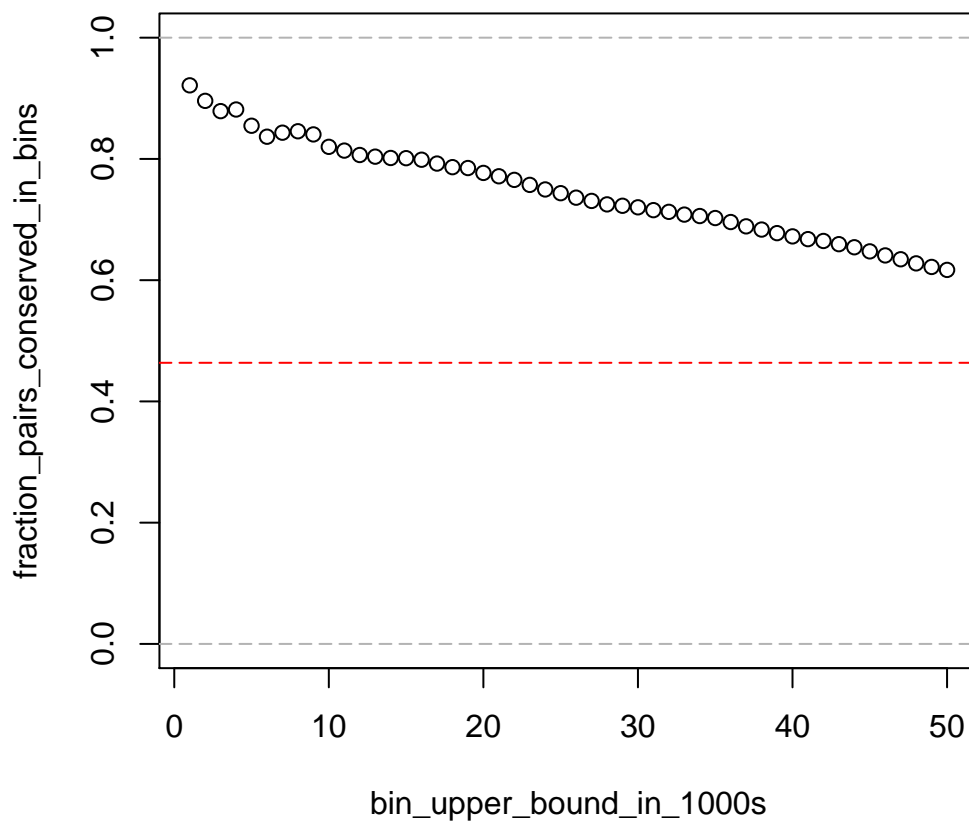

Supplement: s1 [file s1]

**Bin\_conservation\_minus\_bg\_MA-1E\_vs\_NY2A**  
**PD-0.155267**

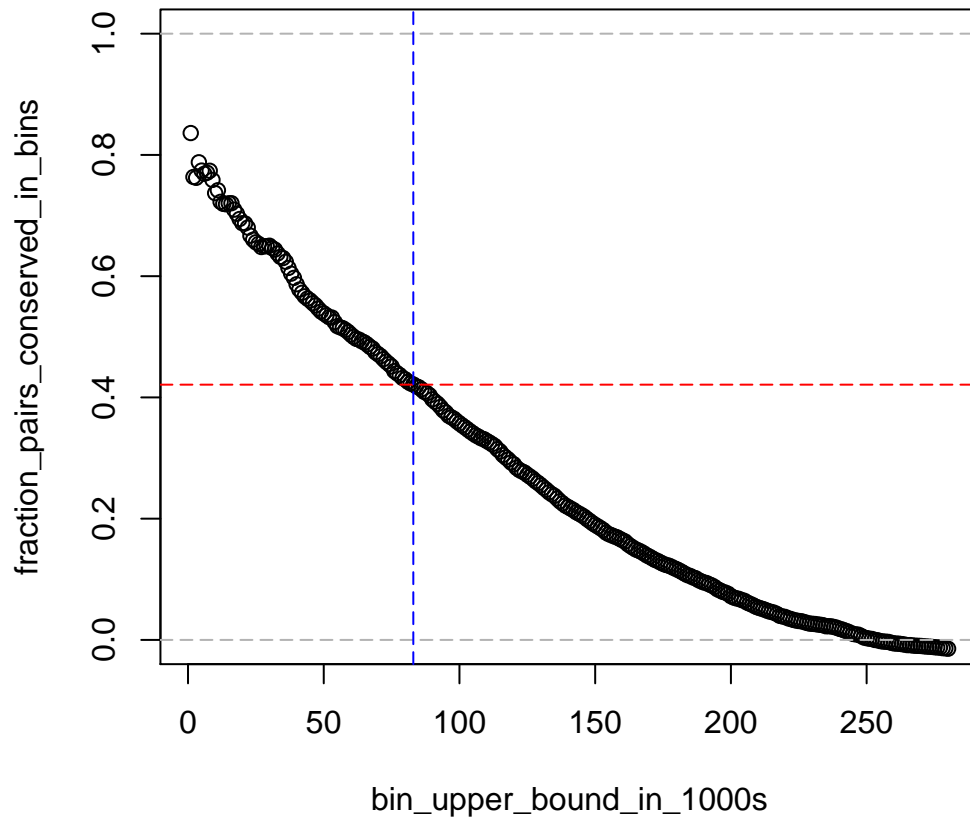

**Bin\_conservation\_minus\_bg\_MA-1E\_vs\_NY2A**  
**PD-0.155267**

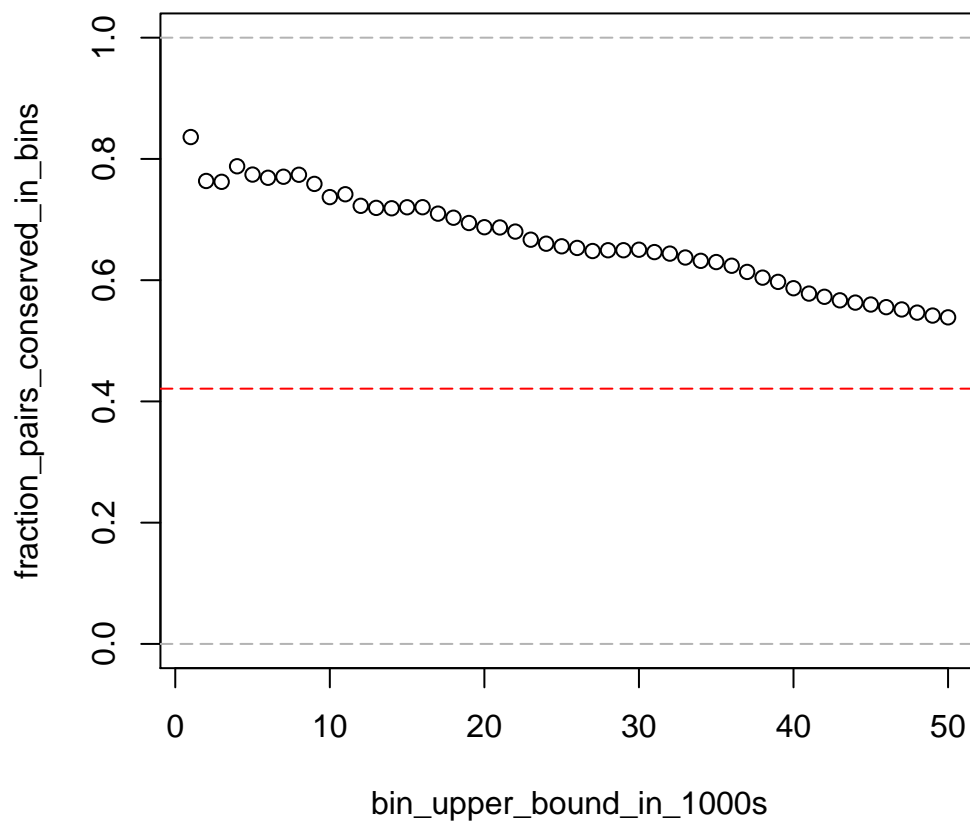

Supplement: s1 [file s1]

**Bin\_conservation\_minus\_bg\_NE-JV-3\_vs\_NTS-1**  
**PD-0.048719**

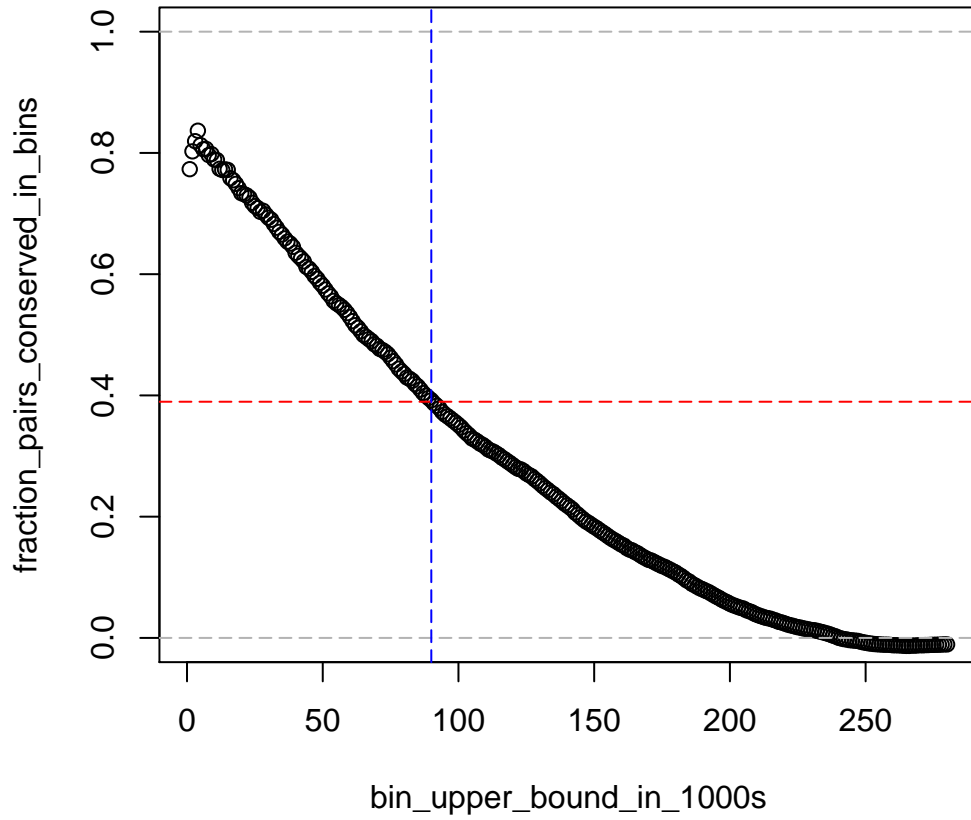

**Bin\_conservation\_minus\_bg\_NE-JV-3\_vs\_NTS-1**  
**PD-0.048719**

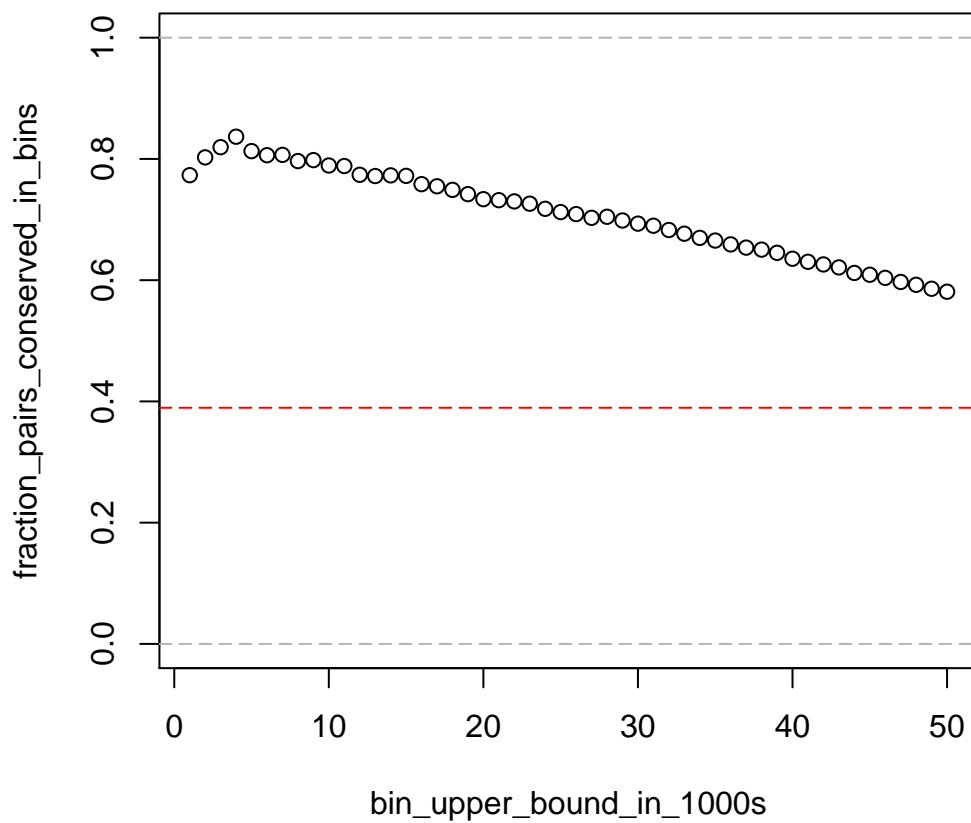

Supplement: s1 [file s1]

**Bin\_conservation\_minus\_bg\_MA-1D\_vs\_PBCV1**  
**PD-0.128278**

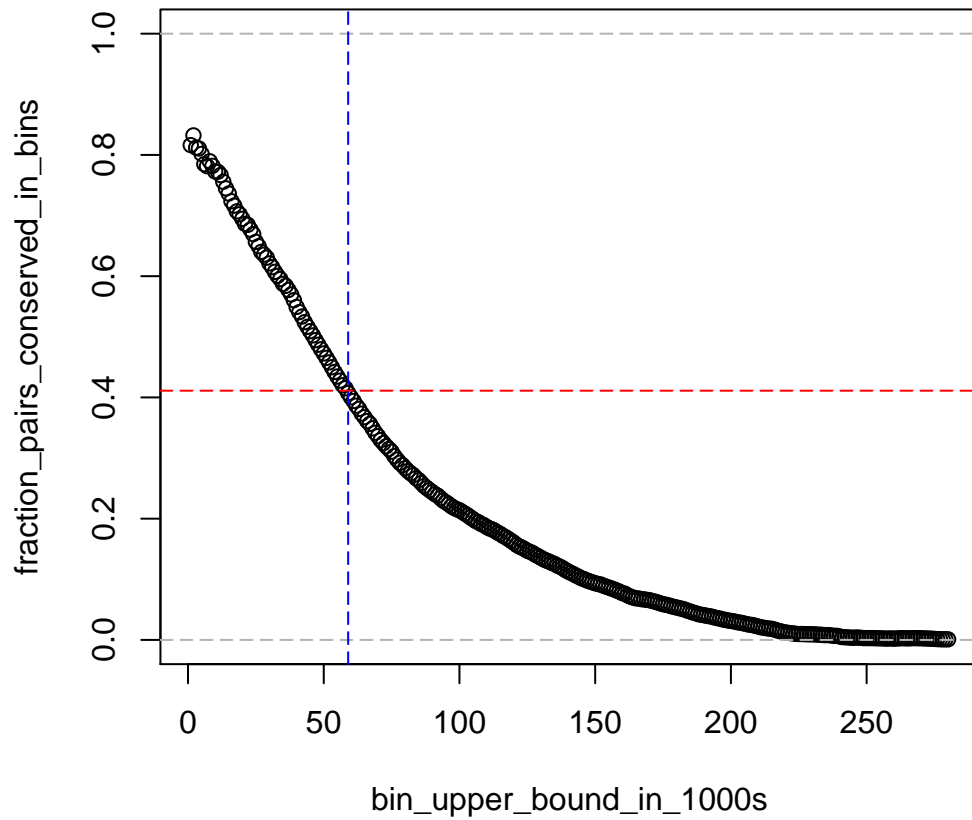

**Bin\_conservation\_minus\_bg\_MA-1D\_vs\_PBCV1**  
**PD-0.128278**

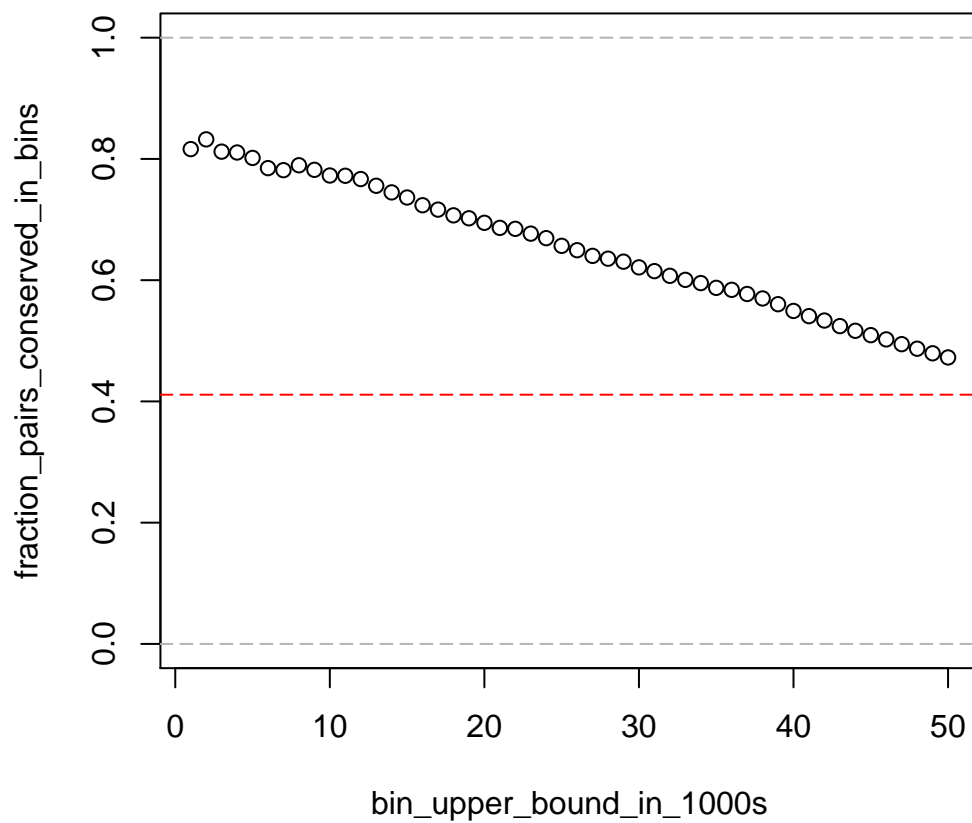

Supplement: s1 [file s1]

**Bin\_conservation\_minus\_bg\_CZ-2\_vs\_TN603.4.2**  
**PD-0.454681**

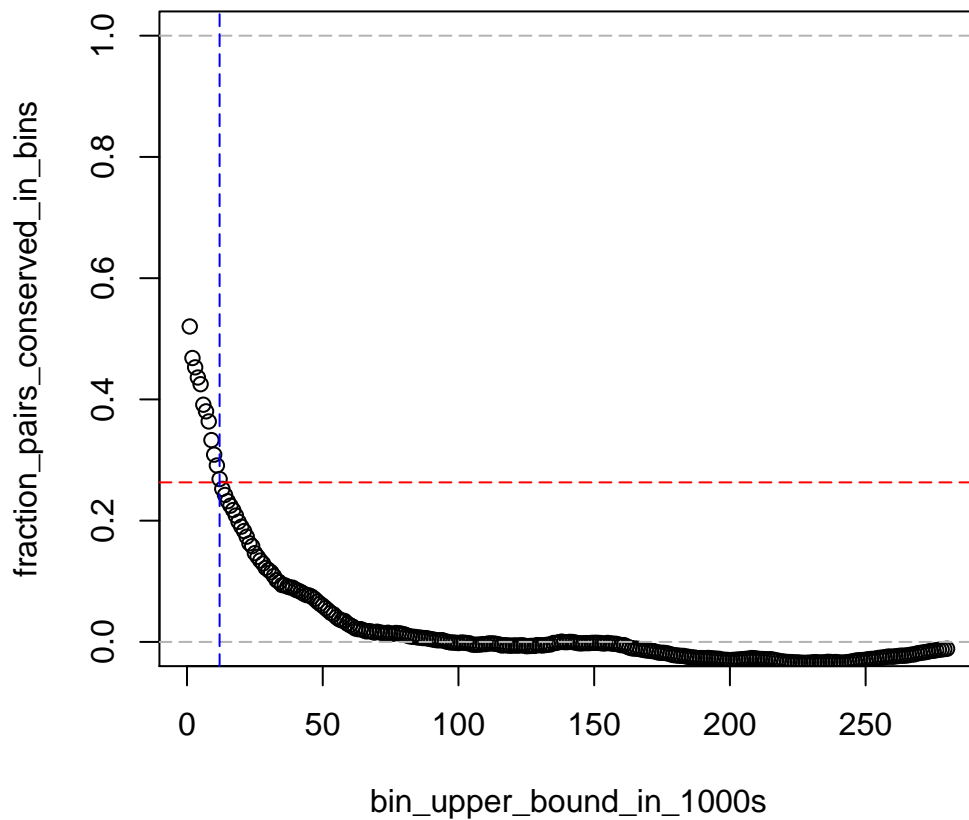

**Bin\_conservation\_minus\_bg\_CZ-2\_vs\_TN603.4.2**  
**PD-0.454681**

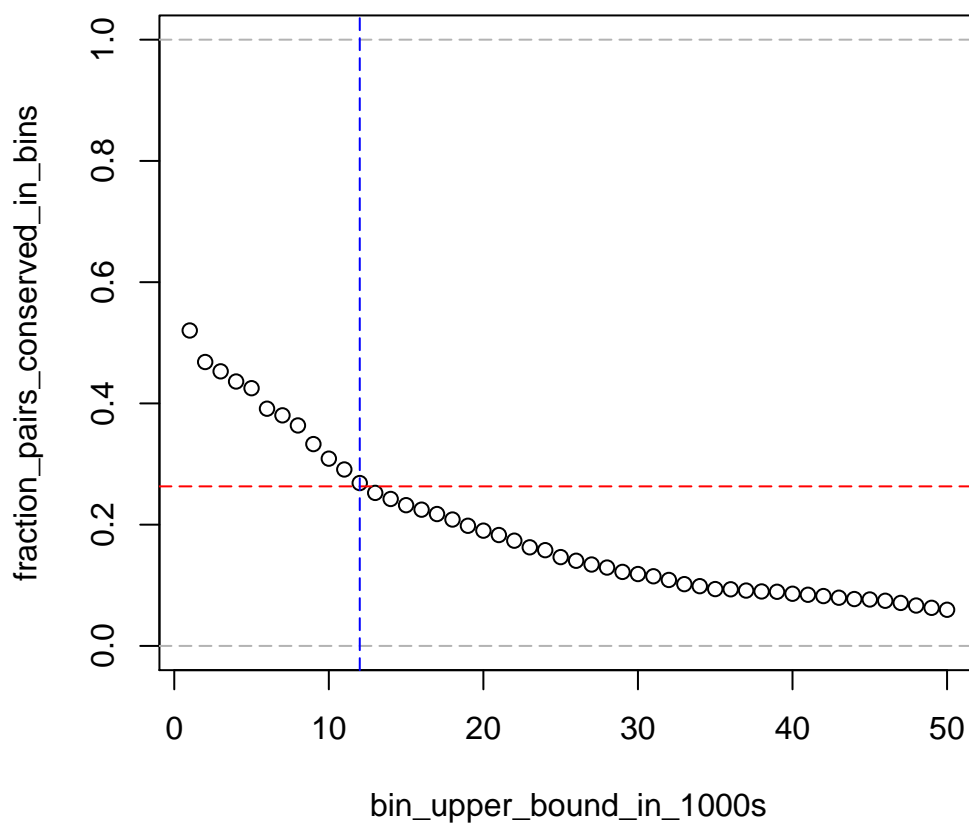

Supplement: s1 [file s1]

**Bin\_conservation\_minus\_bg\_Br0604L\_vs\_NE-JV-3**  
**PD-0.061964**

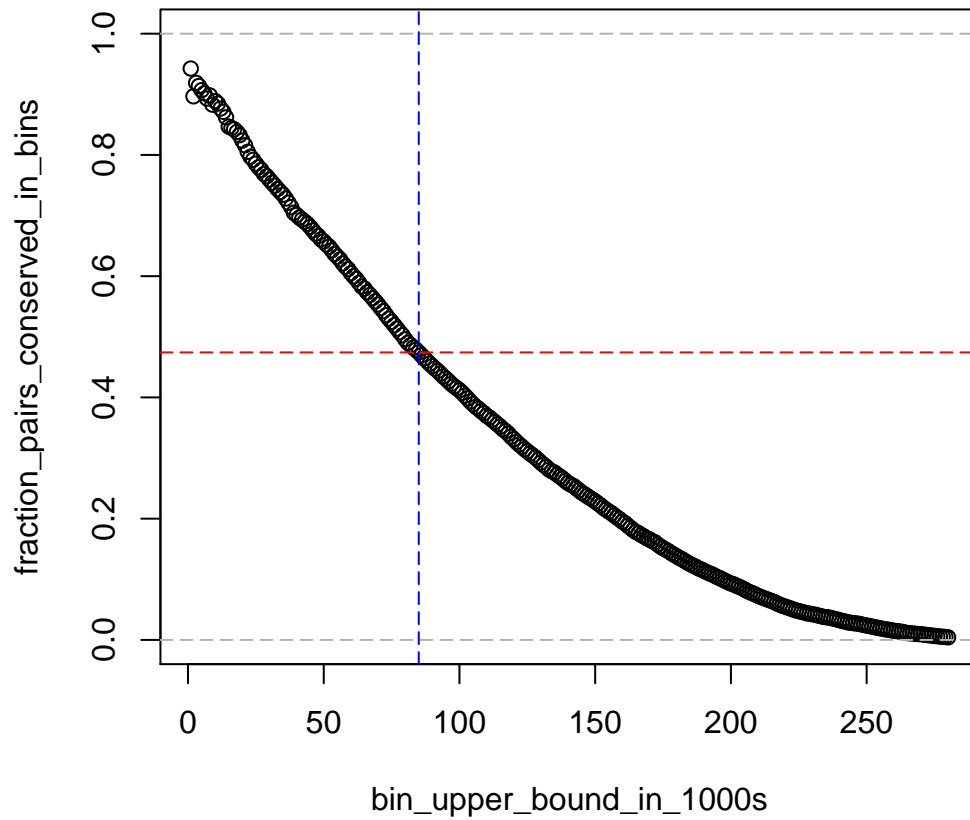

**Bin\_conservation\_minus\_bg\_Br0604L\_vs\_NE-JV-3**  
**PD-0.061964**

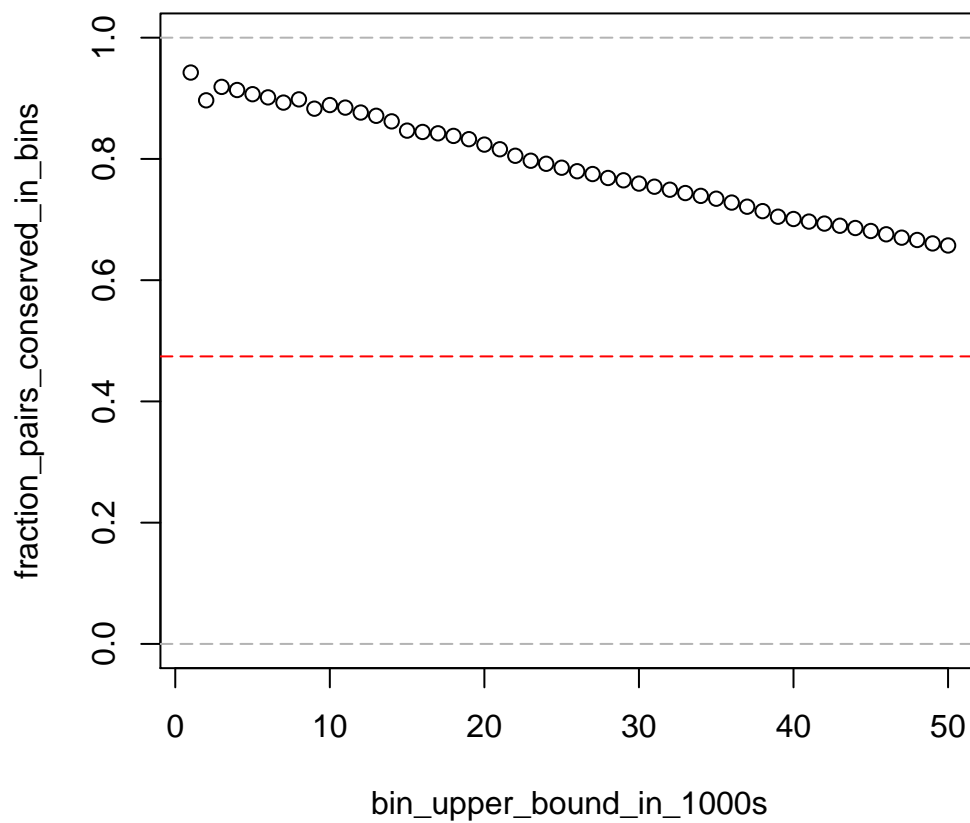

Supplement: s1 [file s1]

**Bin\_conservation\_minus\_bg\_AN69C\_vs\_OR0704.3**  
**PD-0.678463**

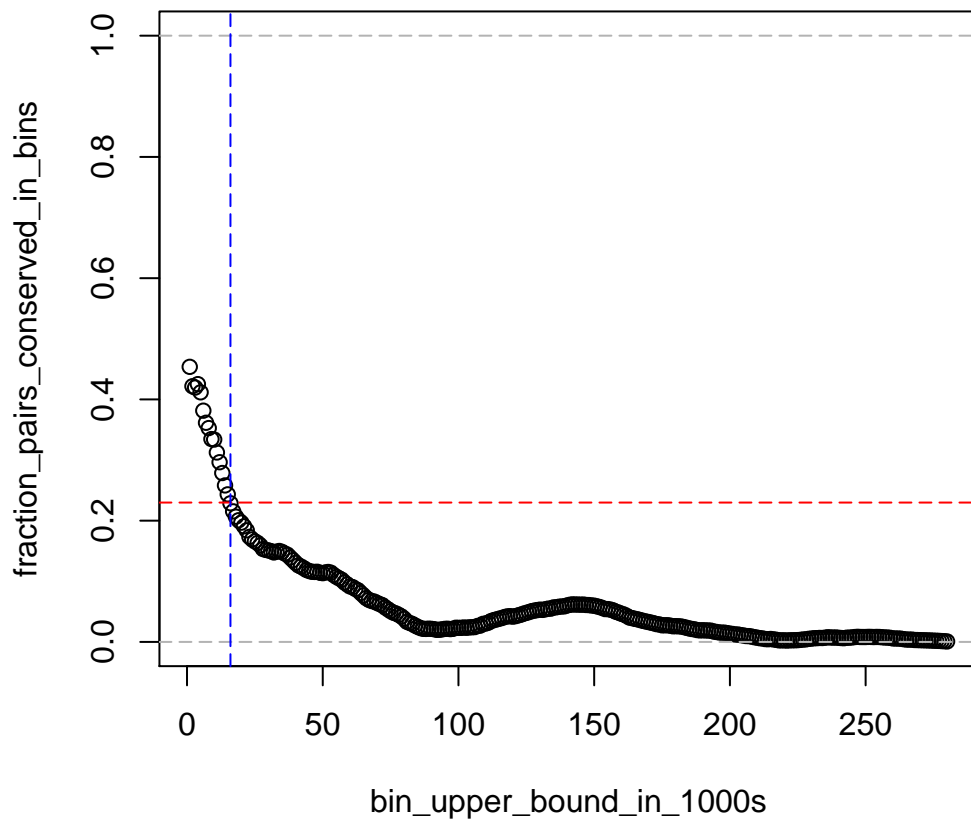

**Bin\_conservation\_minus\_bg\_AN69C\_vs\_OR0704.3**  
**PD-0.678463**

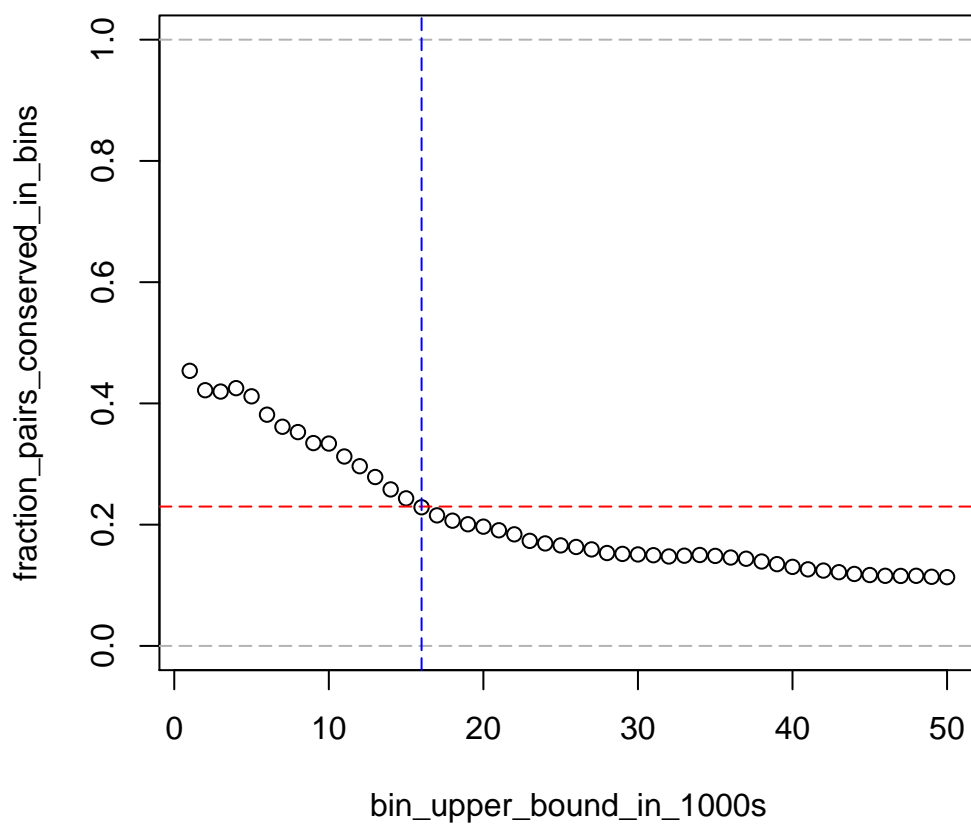

Supplement: s1 [file s1]

**Bin\_conservation\_minus\_bg\_IL-5-2s1\_vs\_MN0810.1**  
**PD-0.701106**

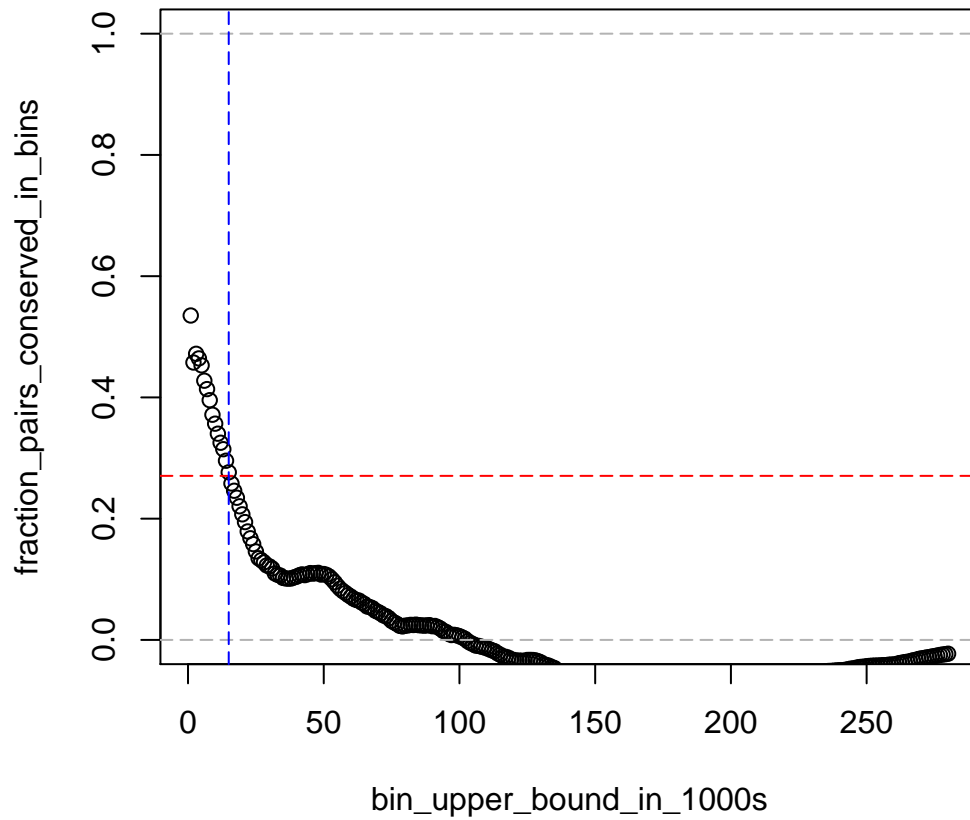

**Bin\_conservation\_minus\_bg\_IL-5-2s1\_vs\_MN0810.1**  
**PD-0.701106**

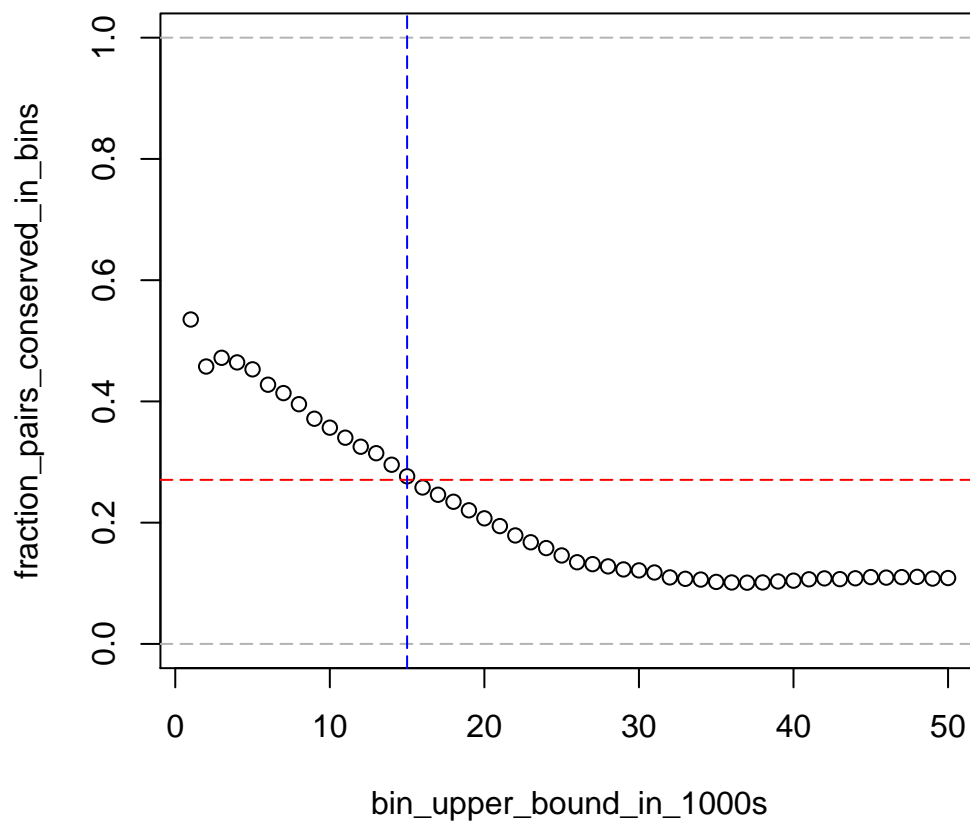

Supplement: s1 [file s1]

**Bin\_conservation\_minus\_bg\_CvsA1\_vs\_MA-1E**  
**PD-0.002552**

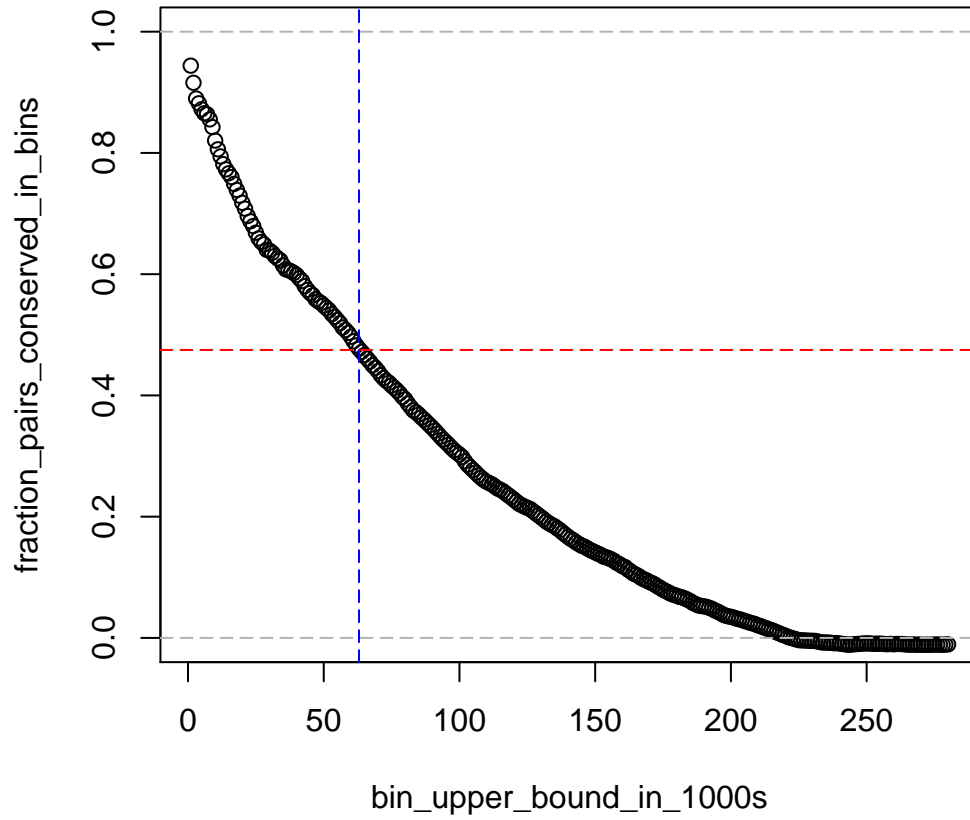

**Bin\_conservation\_minus\_bg\_CvsA1\_vs\_MA-1E**  
**PD-0.002552**

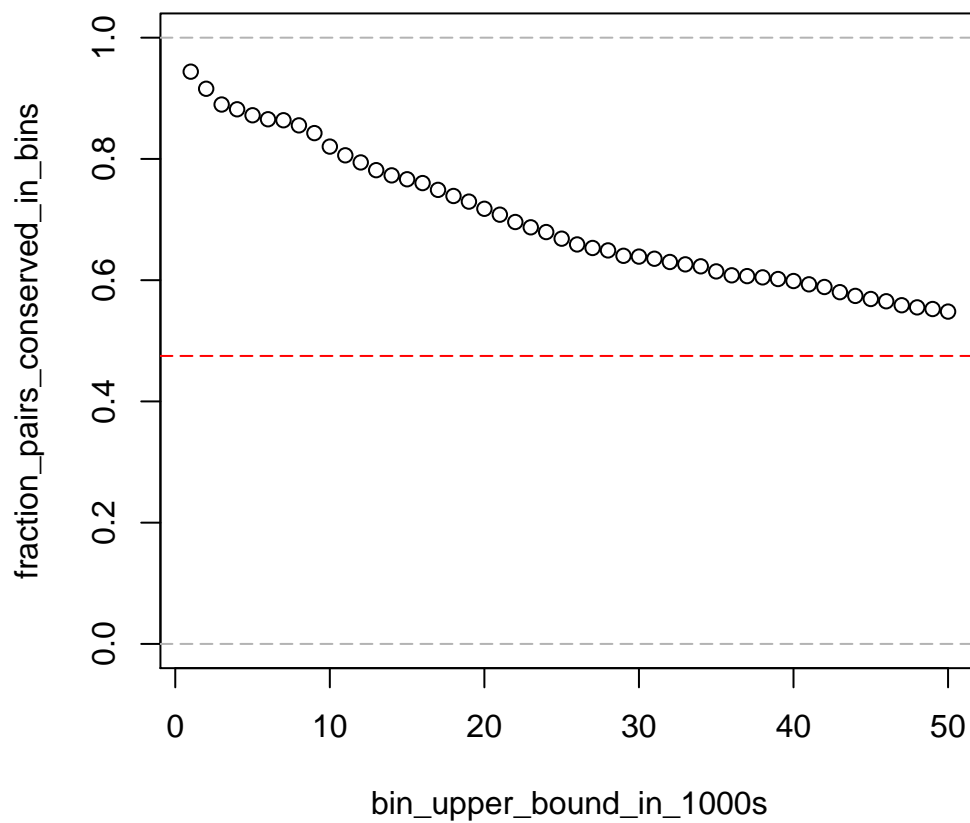

Supplement: s1 [file s1]

**Bin\_conservation\_minus\_bg\_Can18-4\_vs\_NE-JV-4**  
**PD-0.649335**

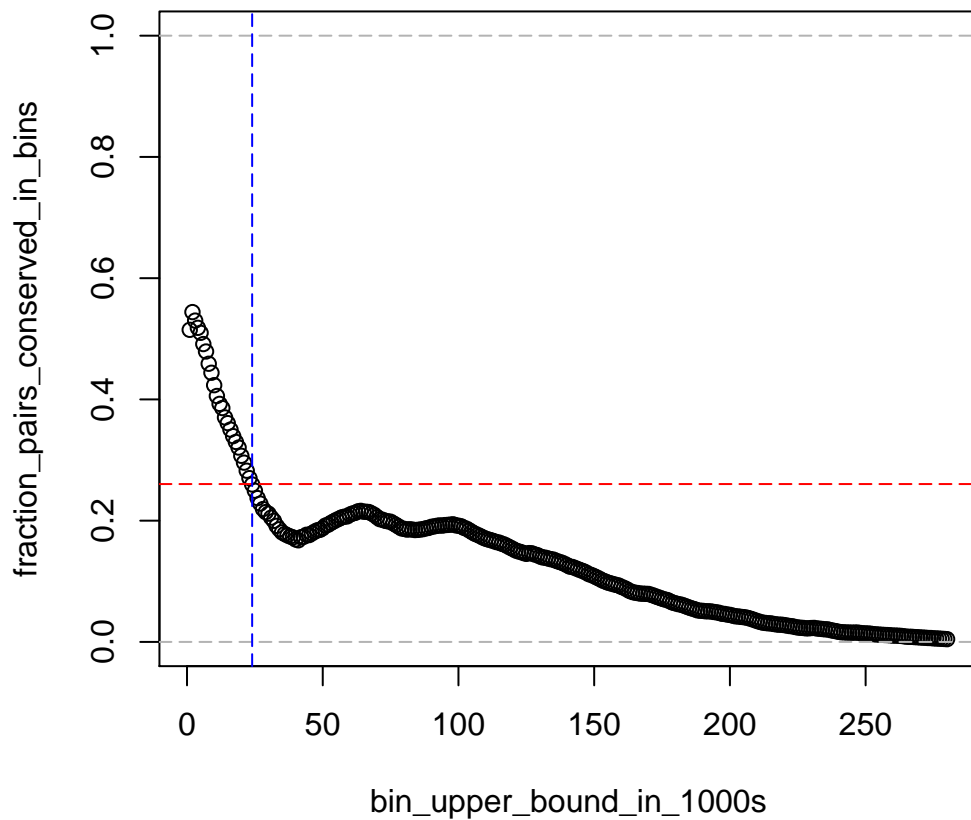

**Bin\_conservation\_minus\_bg\_Can18-4\_vs\_NE-JV-4**  
**PD-0.649335**

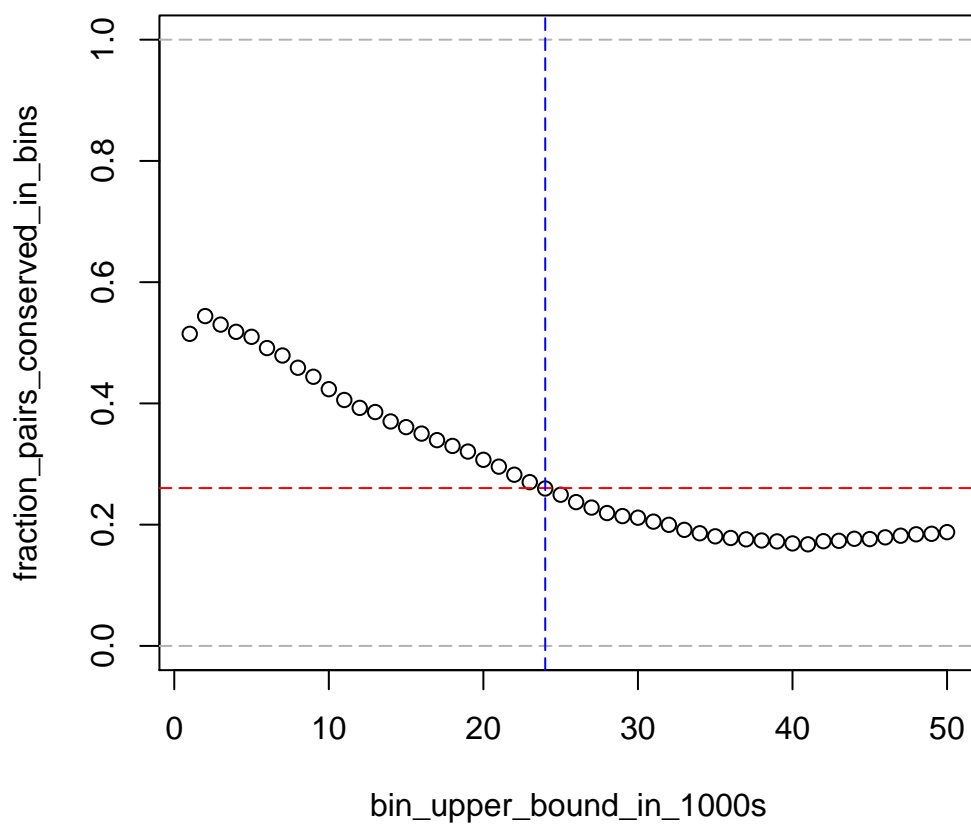

Supplement: s1 [file s1]

**Bin\_conservation\_minus\_bg\_Br0604L\_vs\_CVG-1**  
**PD-0.45111**

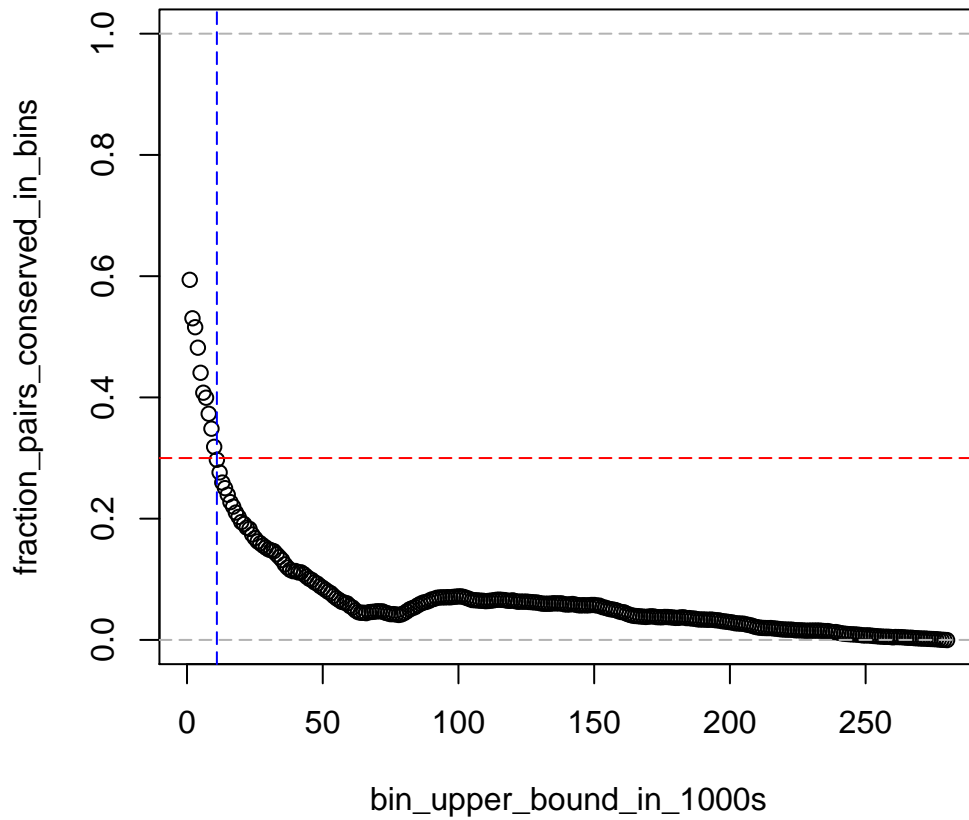

**Bin\_conservation\_minus\_bg\_Br0604L\_vs\_CVG-1**  
**PD-0.45111**

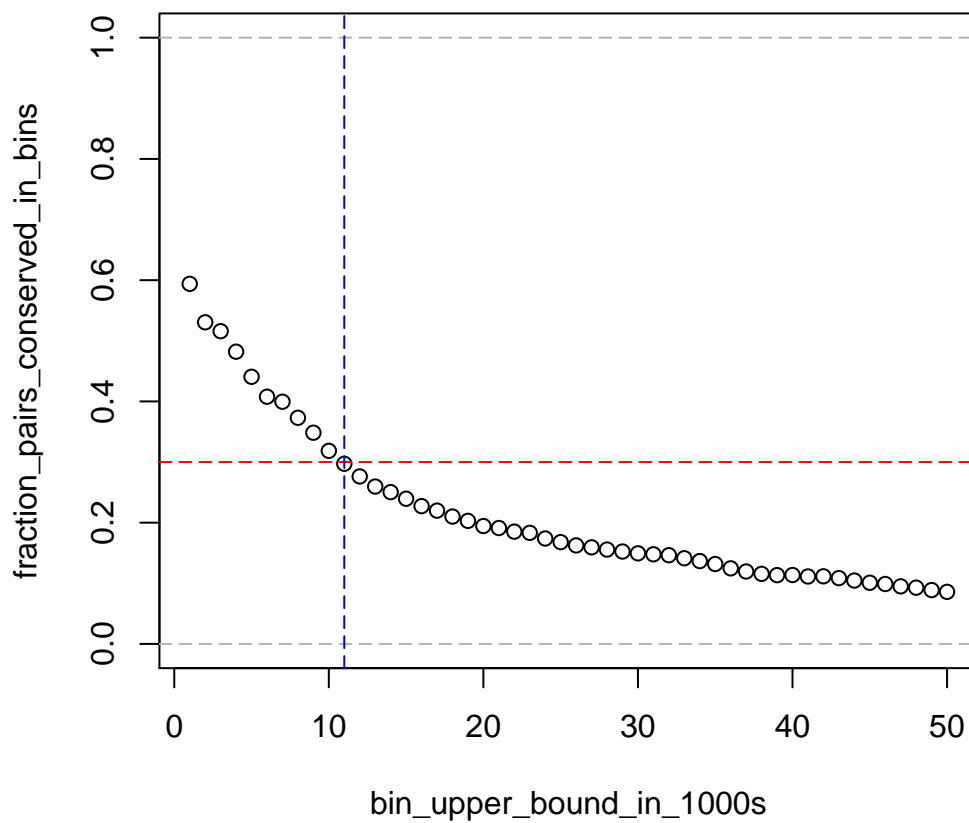

Supplement: s1 [file s1]

**Bin\_conservation\_minus\_bg\_CVG-1\_vs\_NY2A**  
**PD-0.669655**

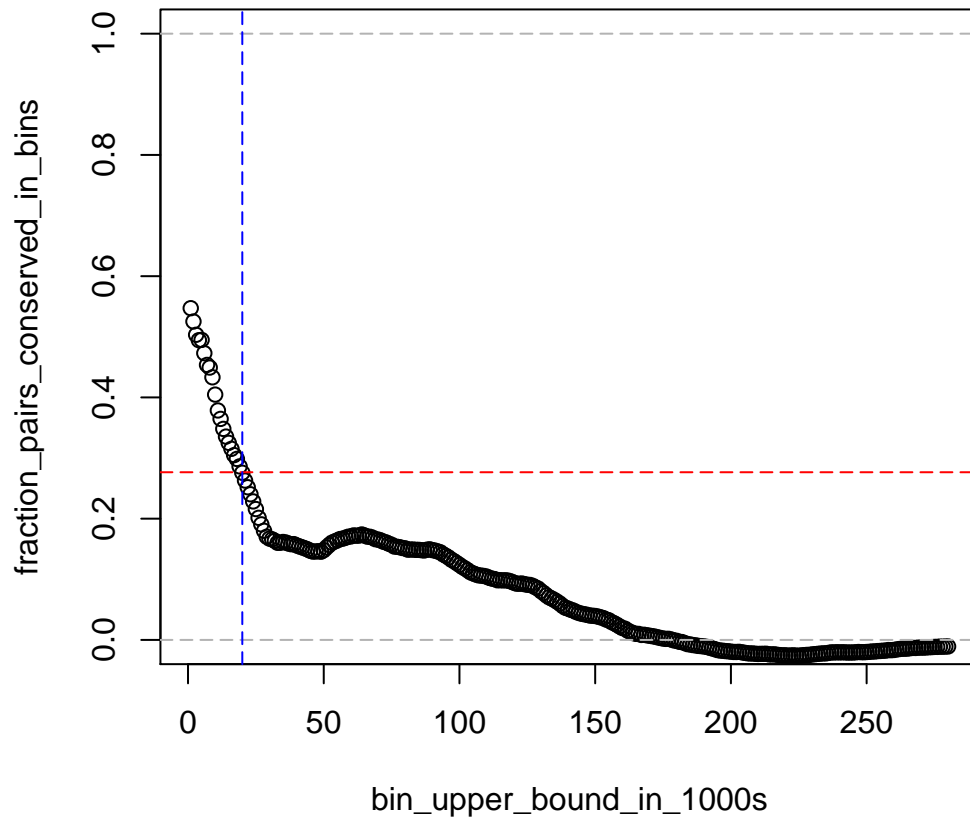

**Bin\_conservation\_minus\_bg\_CVG-1\_vs\_NY2A**  
**PD-0.669655**

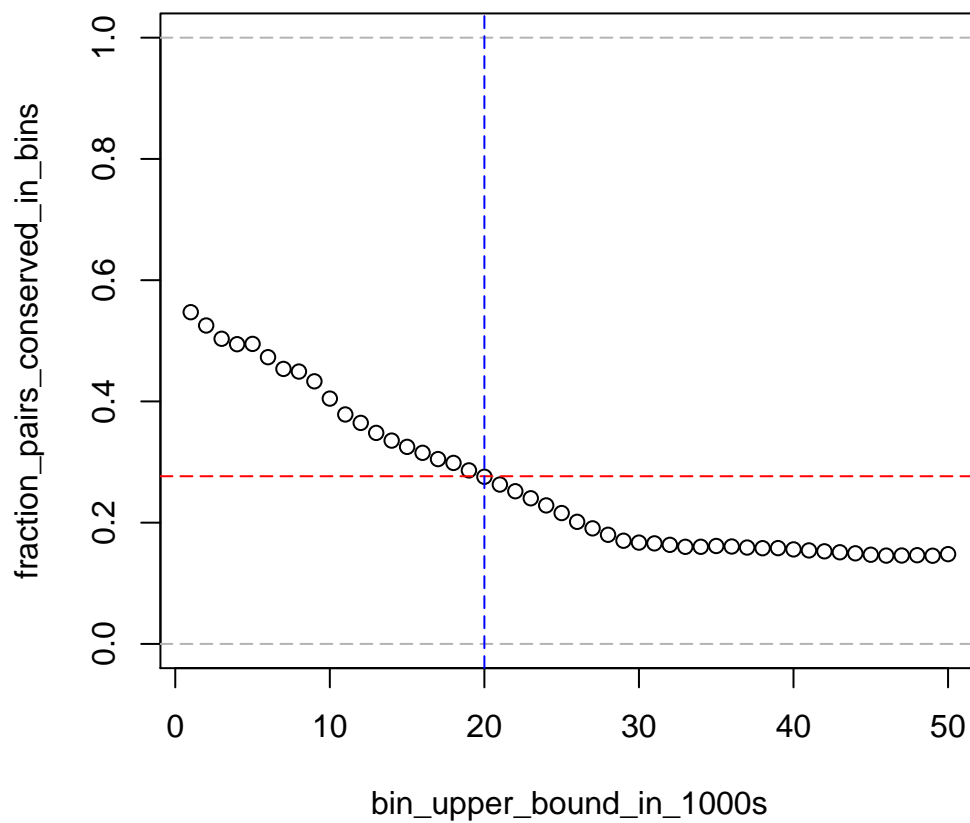

Supplement: s1 [file s1]

**Bin\_conservation\_minus\_bg\_IL-5-2s1\_vs\_NE-JV-2**  
**PD-0.703309**

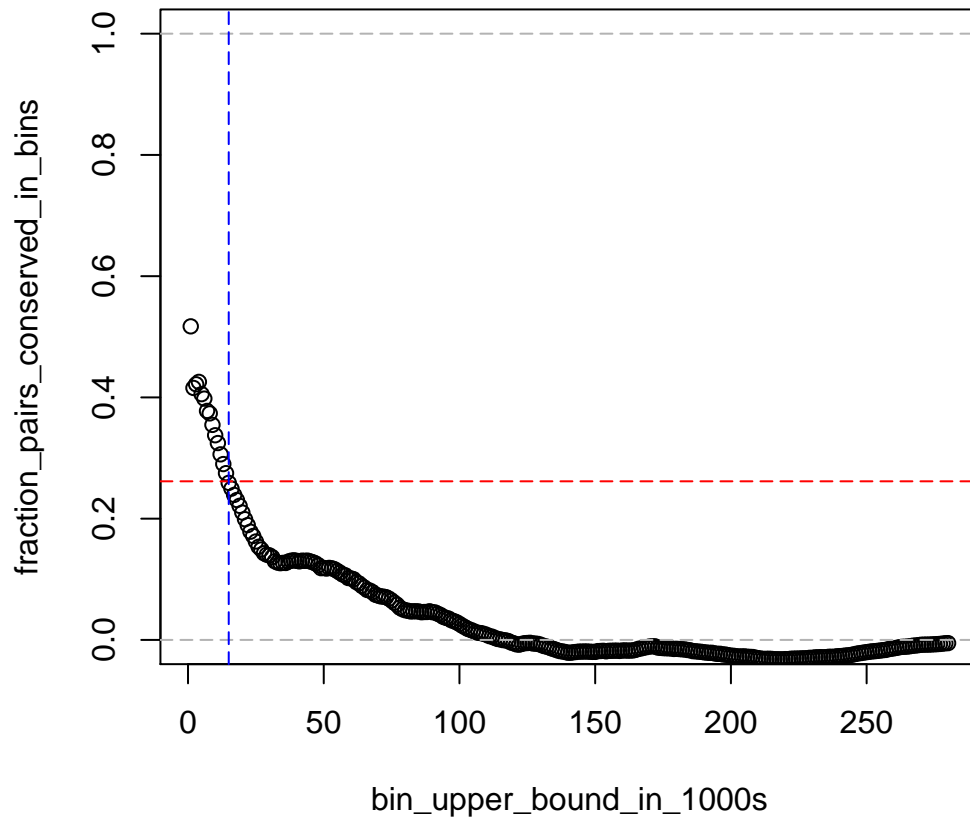

**Bin\_conservation\_minus\_bg\_IL-5-2s1\_vs\_NE-JV-2**  
**PD-0.703309**

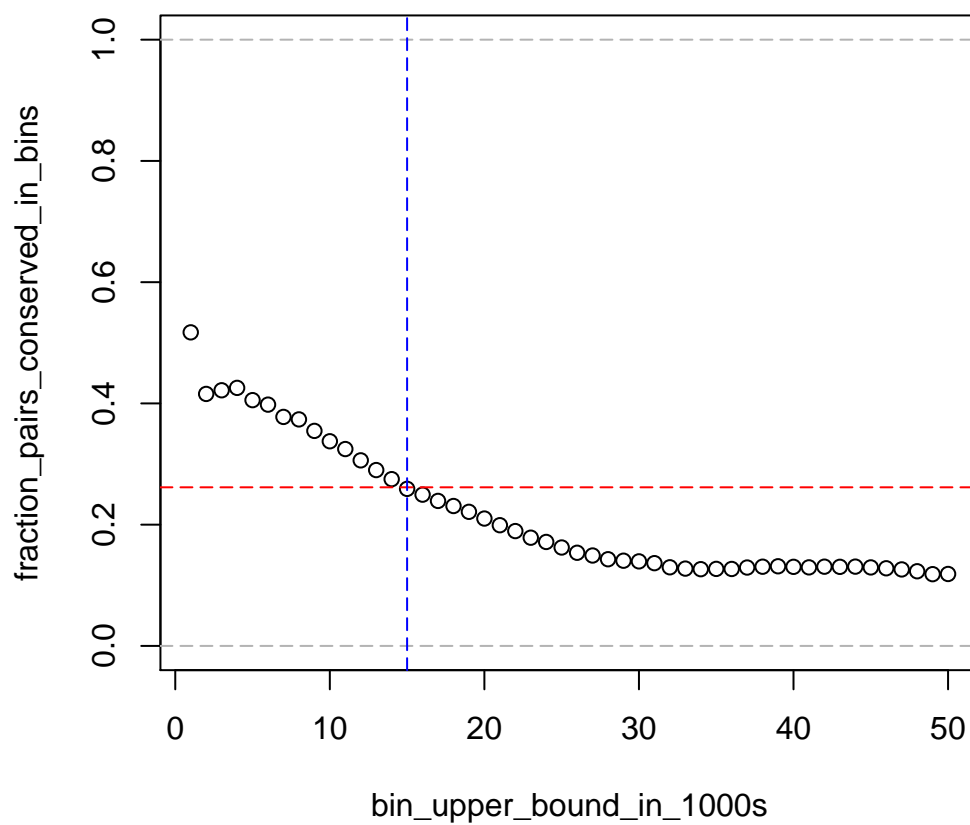

Supplement: s1 [file s1]

**Bin\_conservation\_minus\_bg\_ATCV1\_vs\_OR0704.2.2**  
**PD-0.45874**

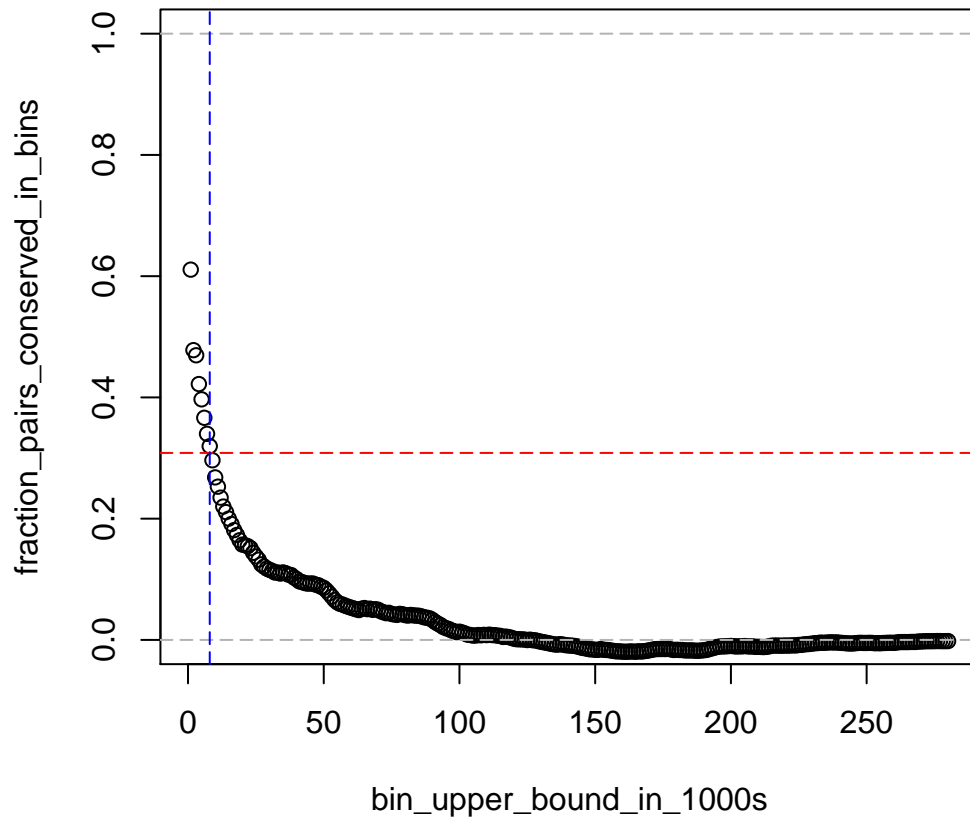

**Bin\_conservation\_minus\_bg\_ATCV1\_vs\_OR0704.2.2**  
**PD-0.45874**

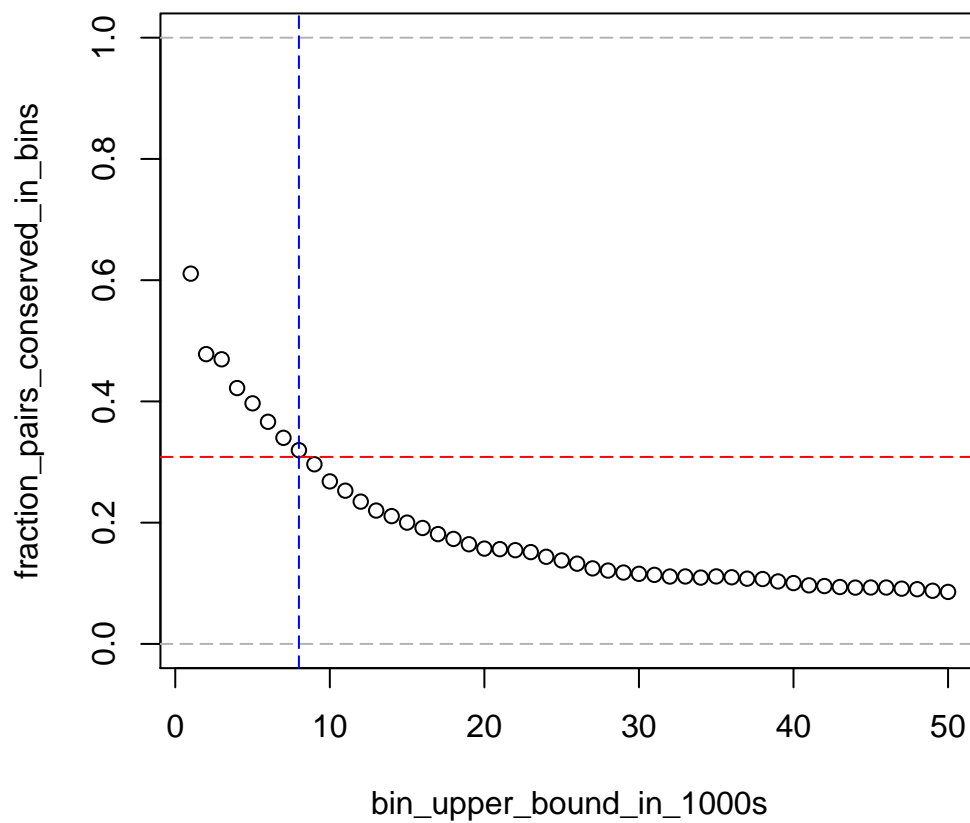

Supplement: s1 [file s1]

**Bin\_conservation\_minus\_bg\_Can0610SP\_vs\_Fr5L**  
**PD-0.459462**

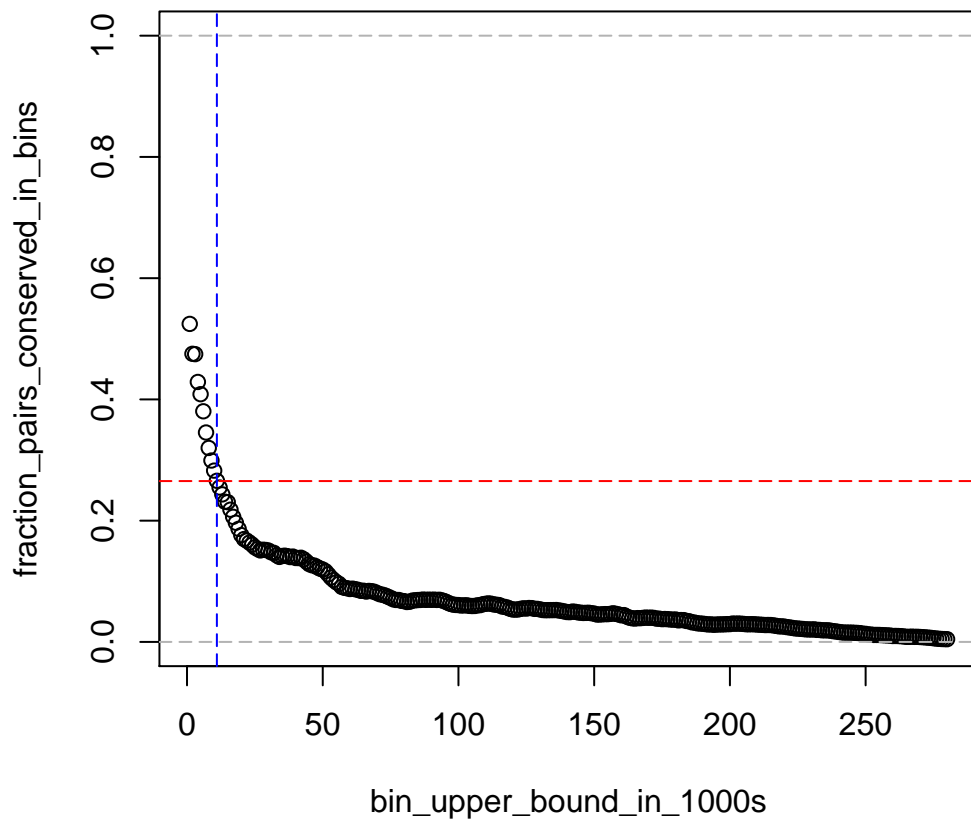

**Bin\_conservation\_minus\_bg\_Can0610SP\_vs\_Fr5L**  
**PD-0.459462**

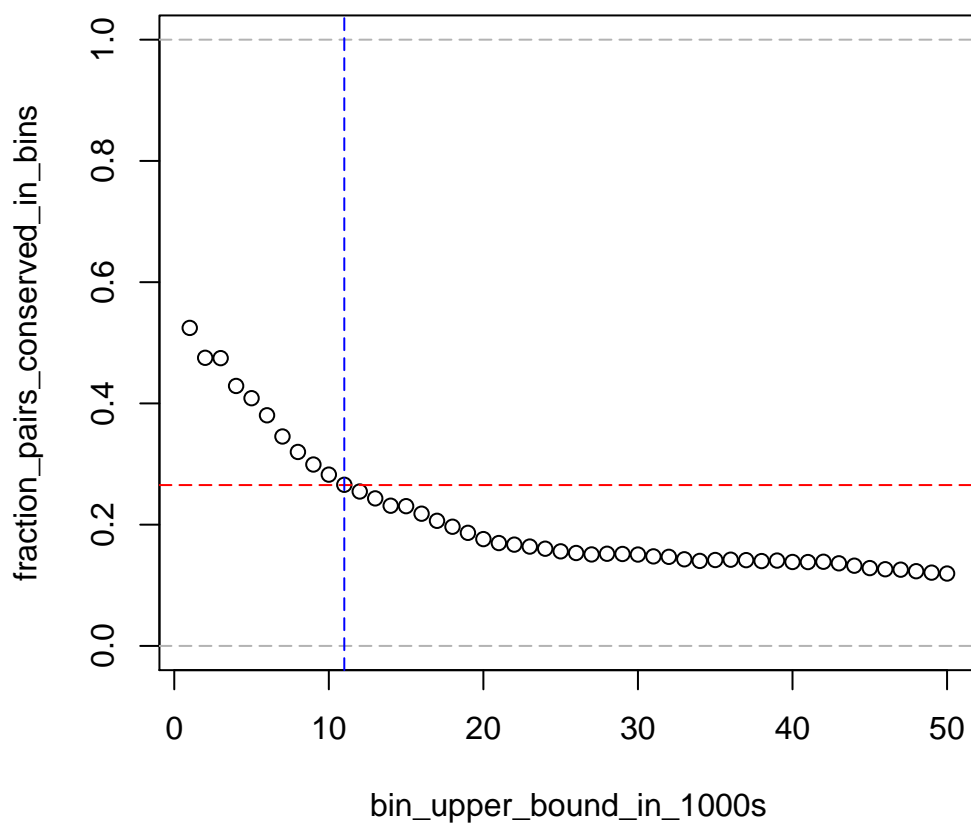

Supplement: s1 [file s1]

**Bin\_conservation\_minus\_bg\_CvsA1\_vs\_CZ-2**  
**PD-0.657557**

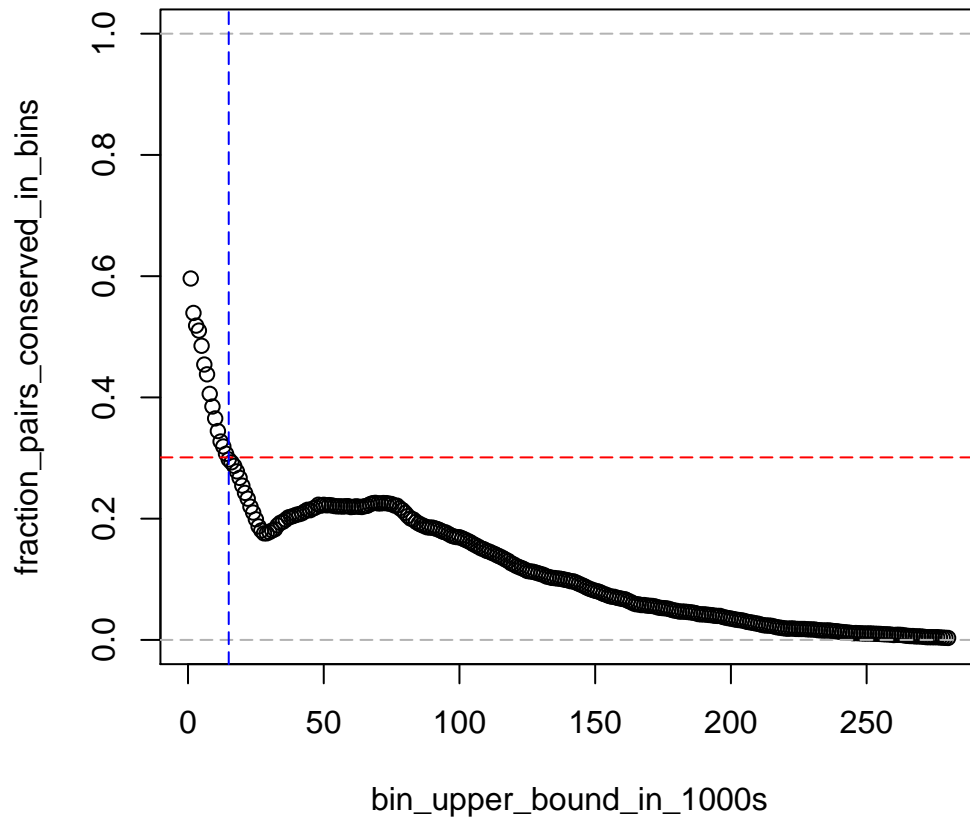

**Bin\_conservation\_minus\_bg\_CvsA1\_vs\_CZ-2**  
**PD-0.657557**

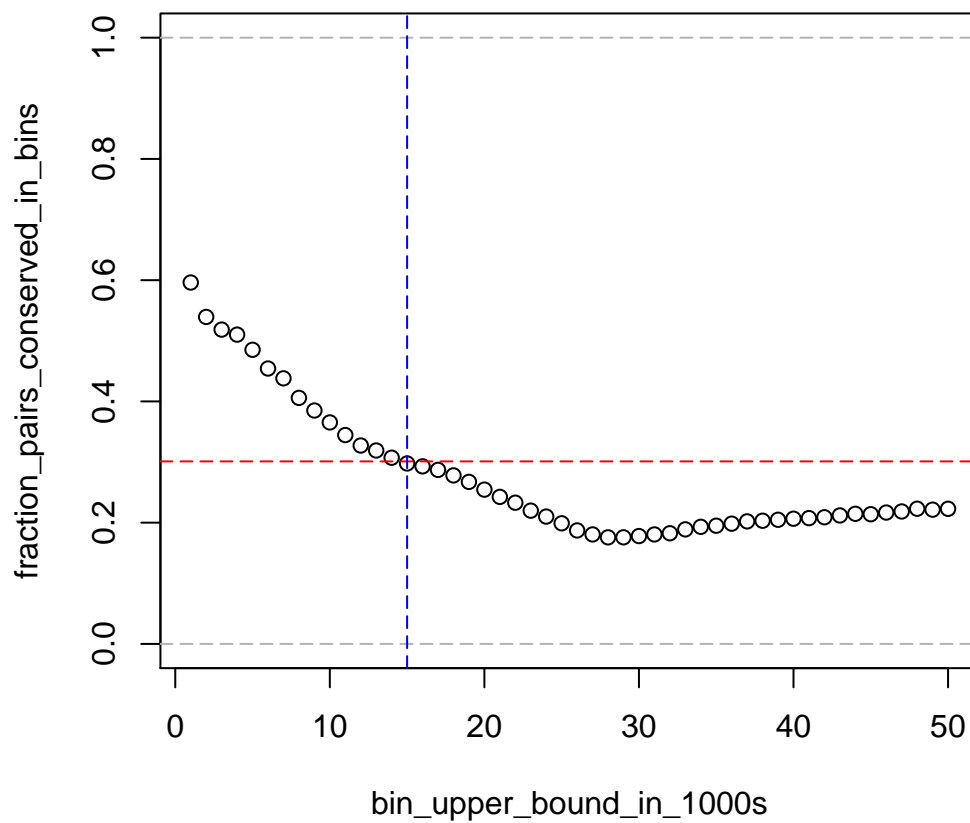

Supplement: s1 [file s1]

**Bin\_conservation\_minus\_bg\_MN0810.1\_vs\_NY2A**  
**PD-0.707647**

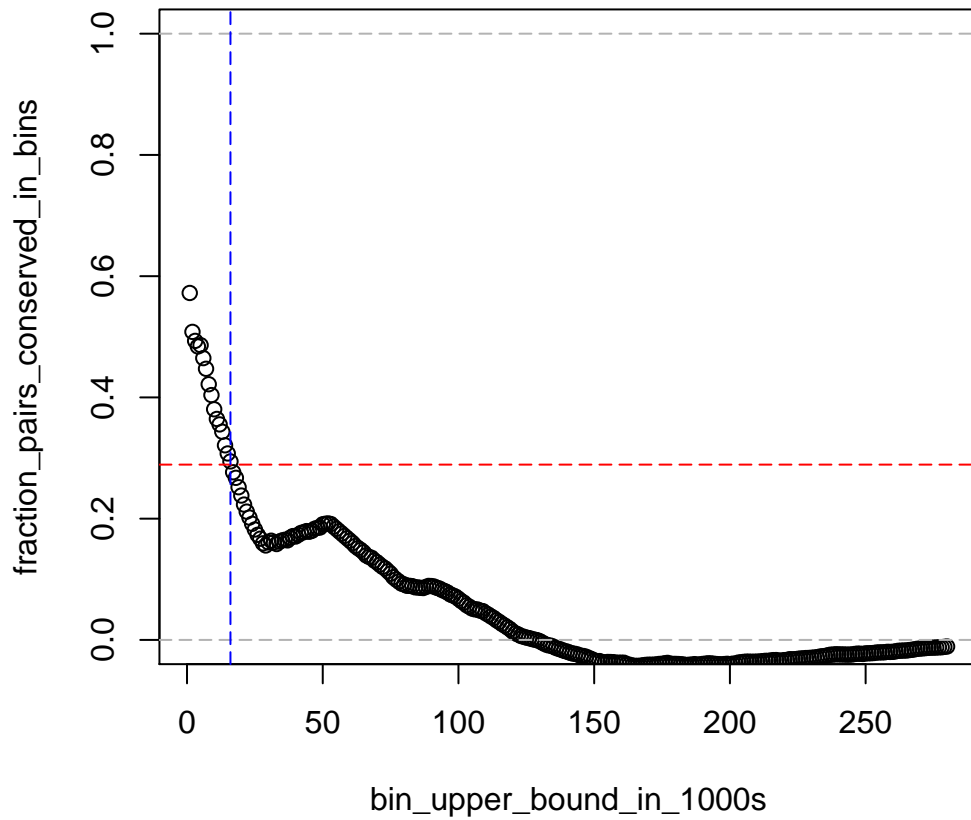

**Bin\_conservation\_minus\_bg\_MN0810.1\_vs\_NY2A**  
**PD-0.707647**

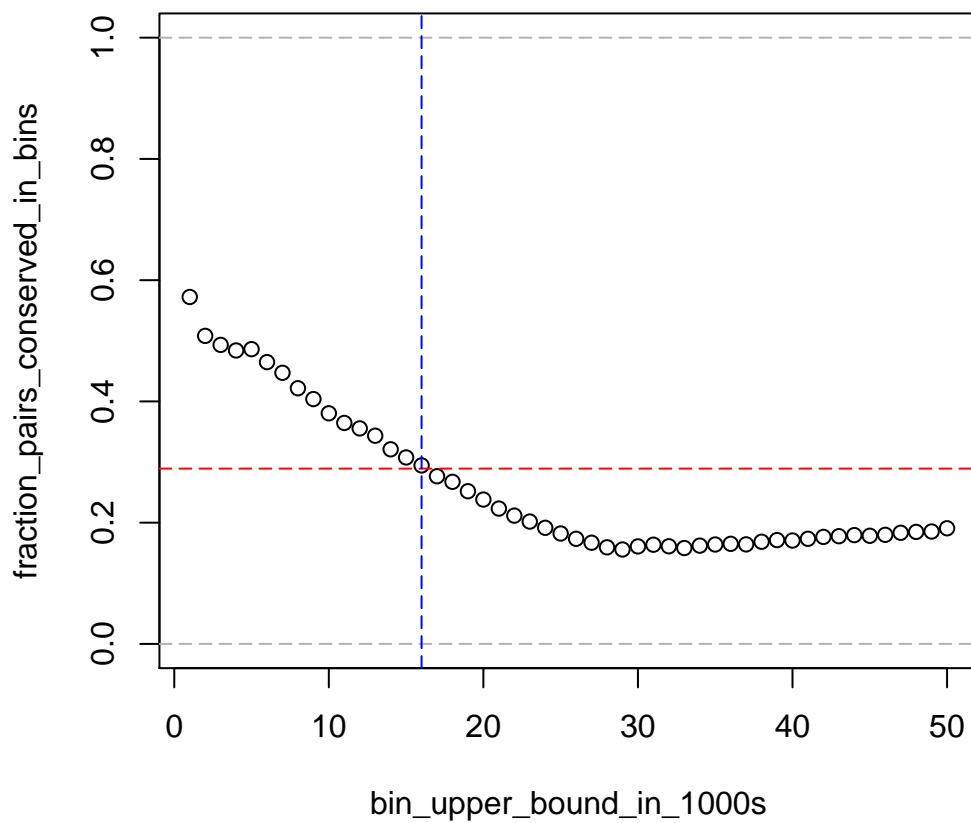

Supplement: s1 [file s1]

**Bin\_conservation\_minus\_bg\_IL-5-2s1\_vs\_NE-JV-1**  
**PD-0.69516**

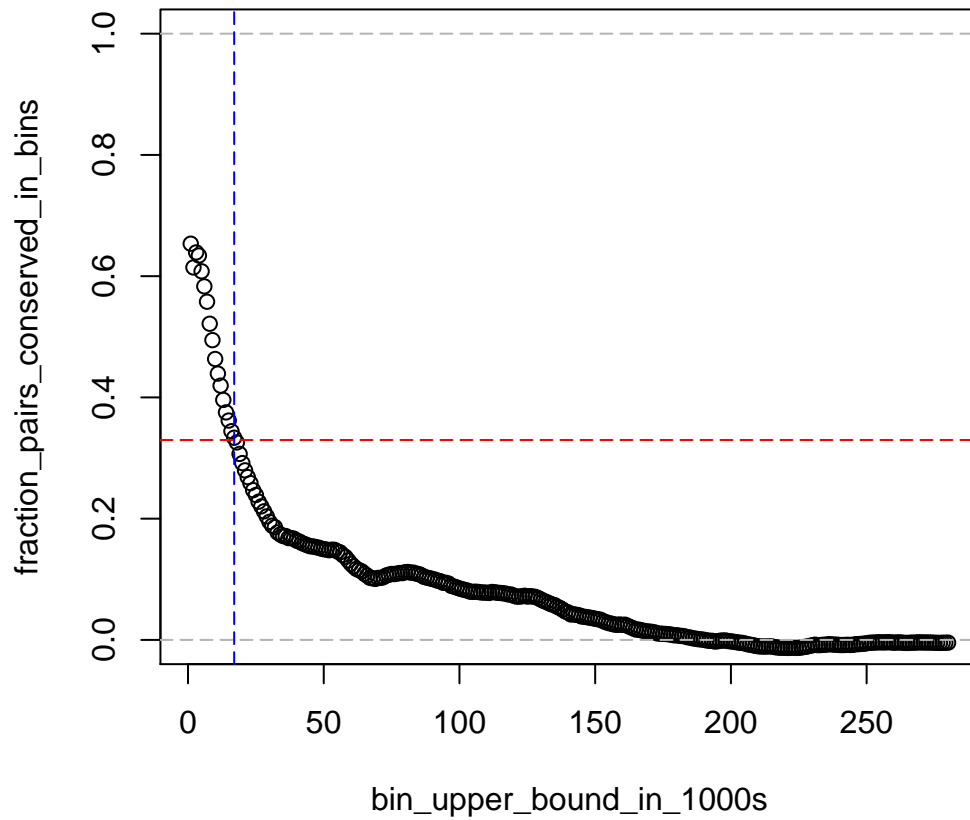

**Bin\_conservation\_minus\_bg\_IL-5-2s1\_vs\_NE-JV-1**  
**PD-0.69516**

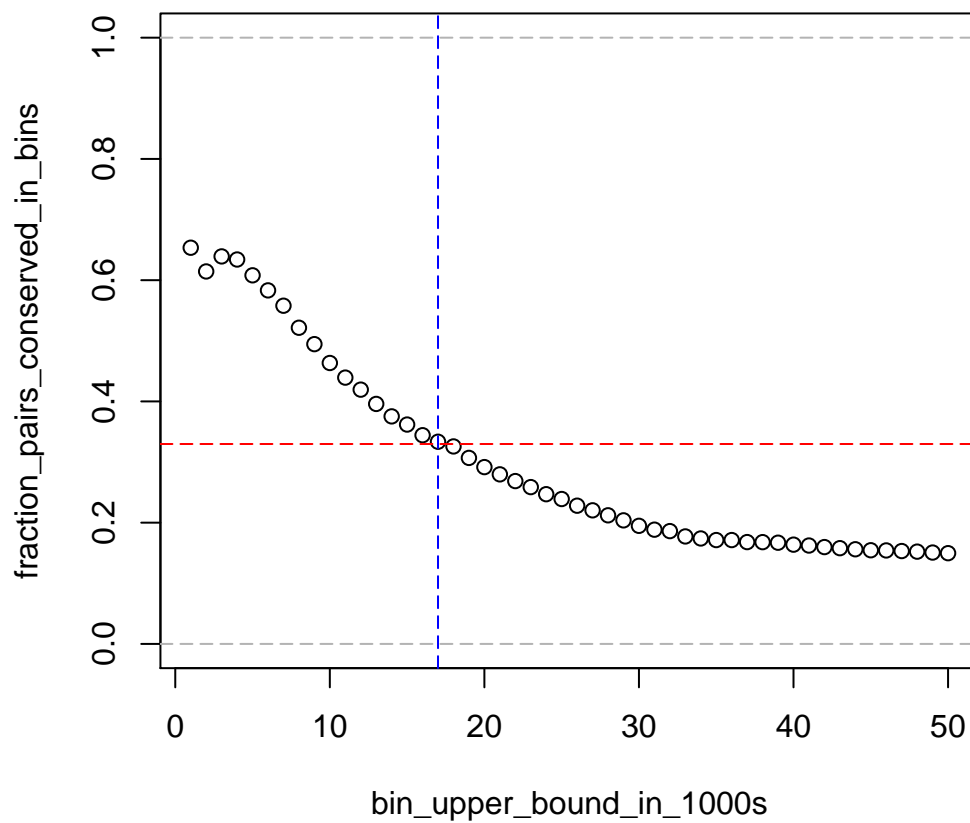

Supplement: s1 [file s1]

**Bin\_conservation\_minus\_bg\_ATCV1\_vs\_Canal-1**  
**PD-0.113198**

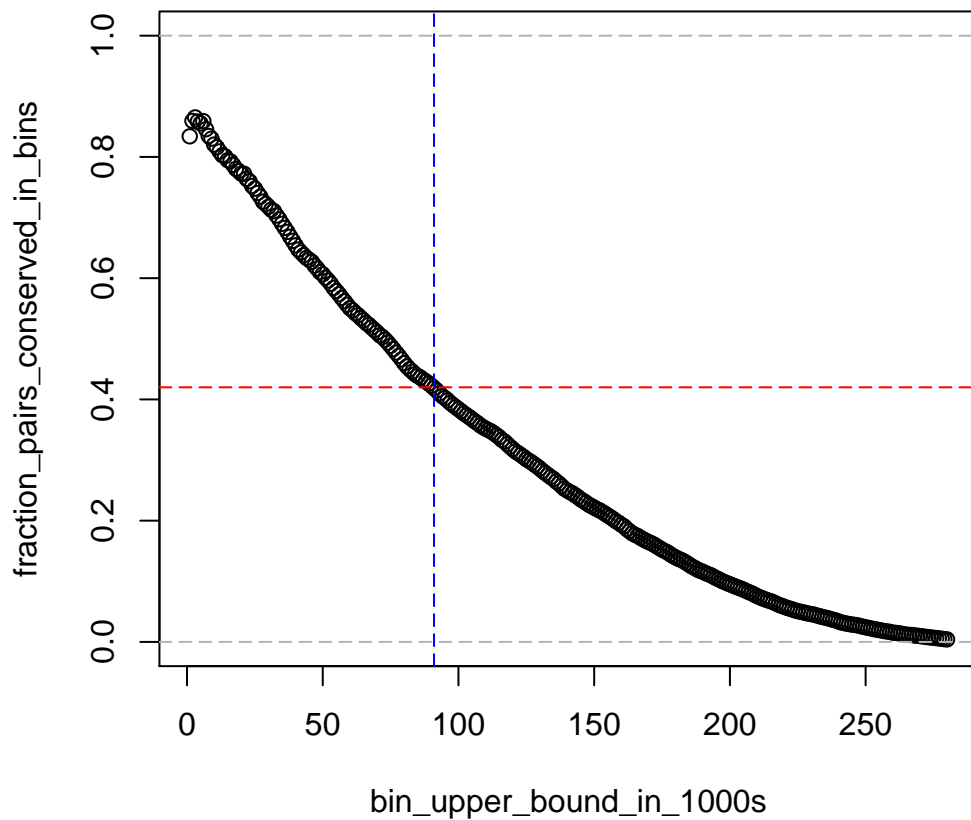

**Bin\_conservation\_minus\_bg\_ATCV1\_vs\_Canal-1**  
**PD-0.113198**

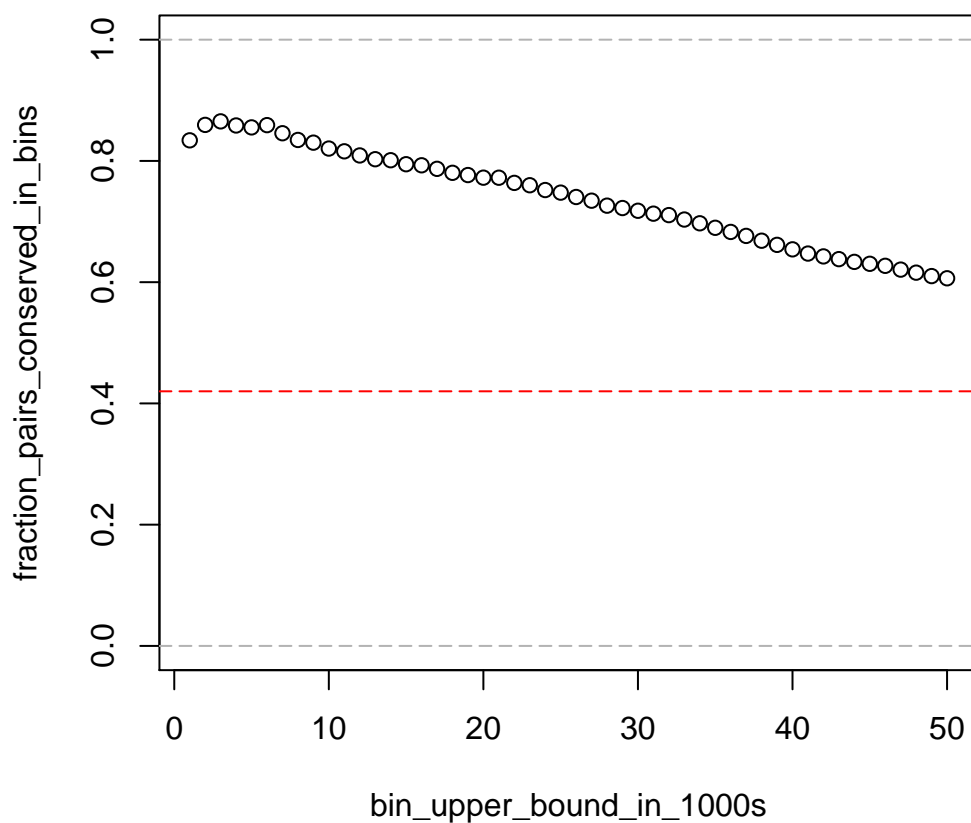

Supplement: s1 [file s1]

**Bin\_conservation\_minus\_bg\_CVM-1\_vs\_NYs-1**  
**PD-0.659941**

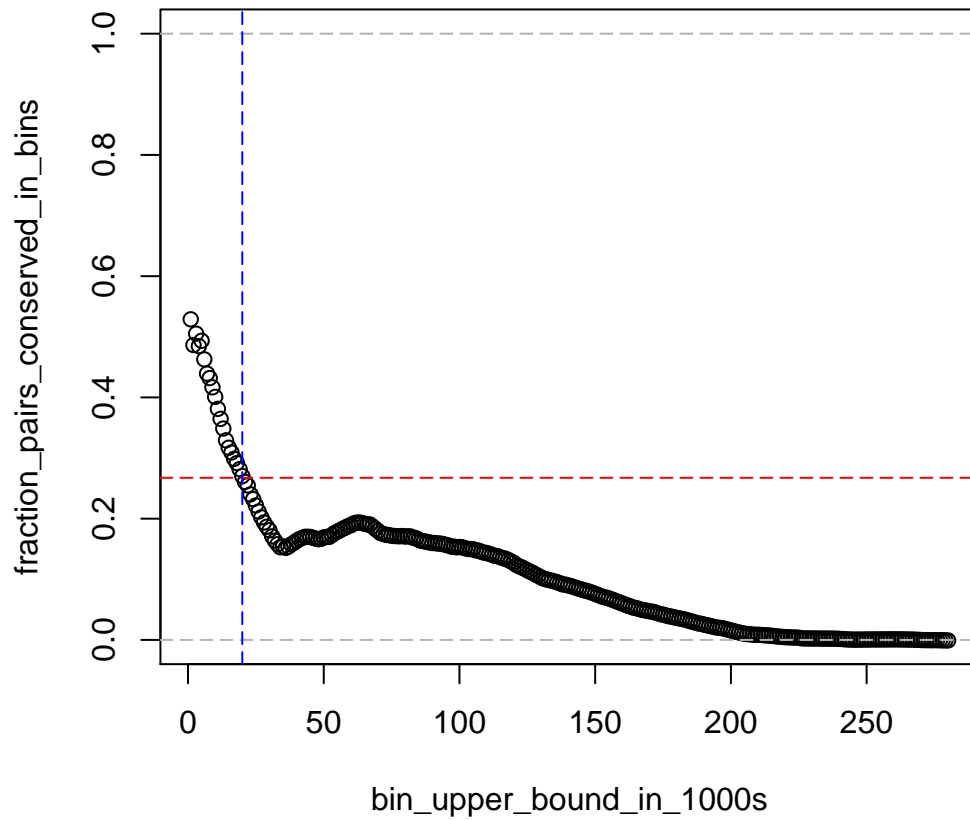

**Bin\_conservation\_minus\_bg\_CVM-1\_vs\_NYs-1**  
**PD-0.659941**

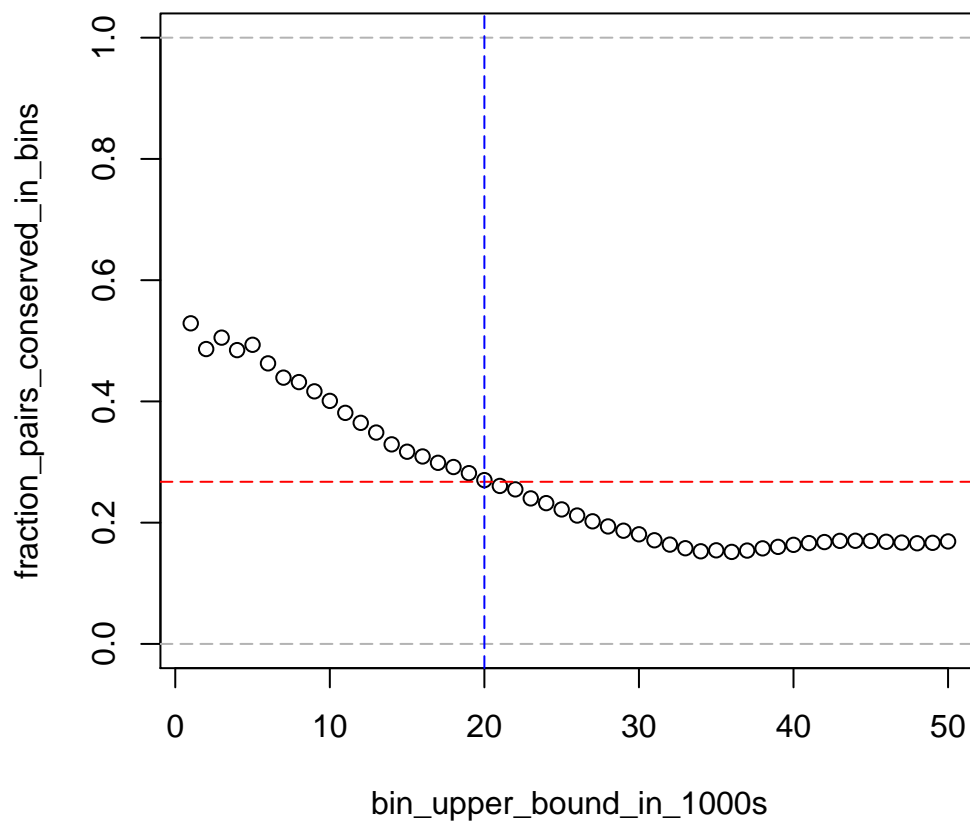

Supplement: s1 [file s1]

**Bin\_conservation\_minus\_bg\_AR158\_vs\_OR0704.2.2**  
**PD-0.662707**

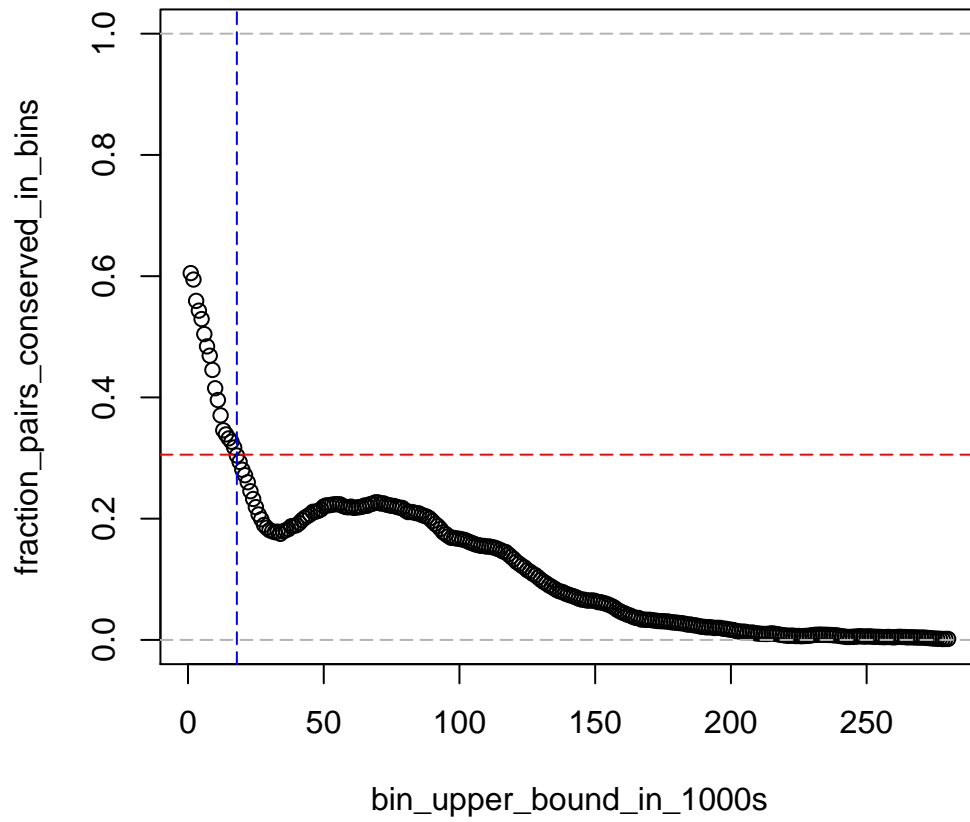

**Bin\_conservation\_minus\_bg\_AR158\_vs\_OR0704.2.2**  
**PD-0.662707**

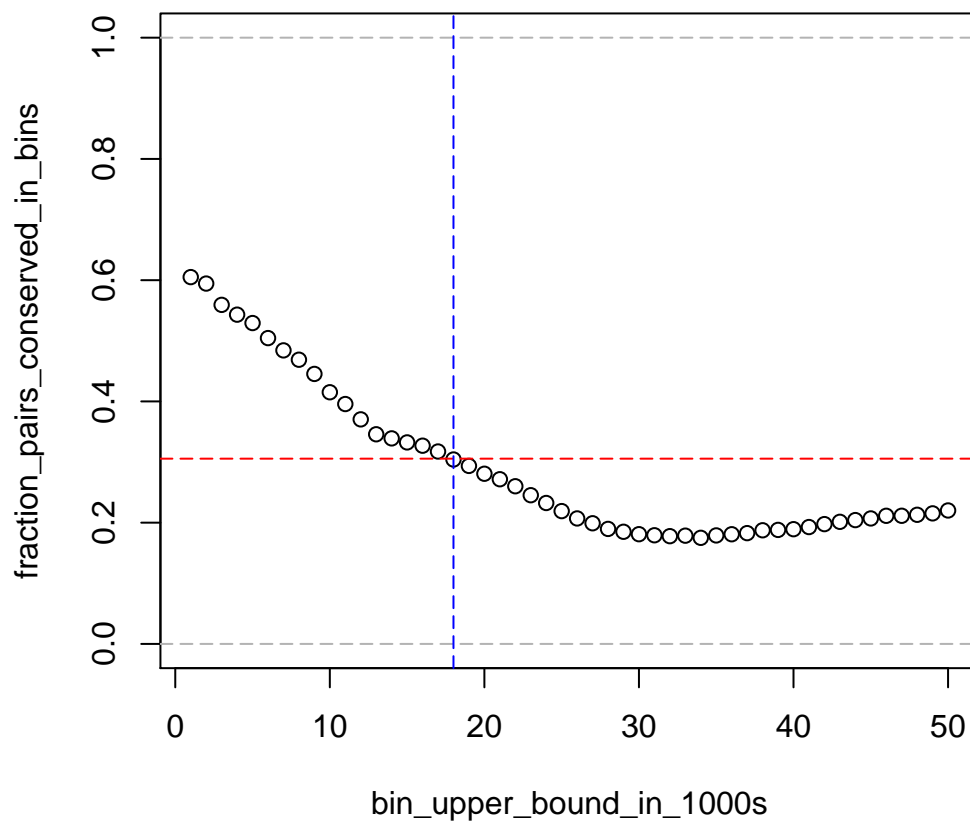

Supplement: s1 [file s1]

**Bin\_conservation\_minus\_bg\_Can0610SP\_vs\_CVR-1**  
**PD-0.457853**

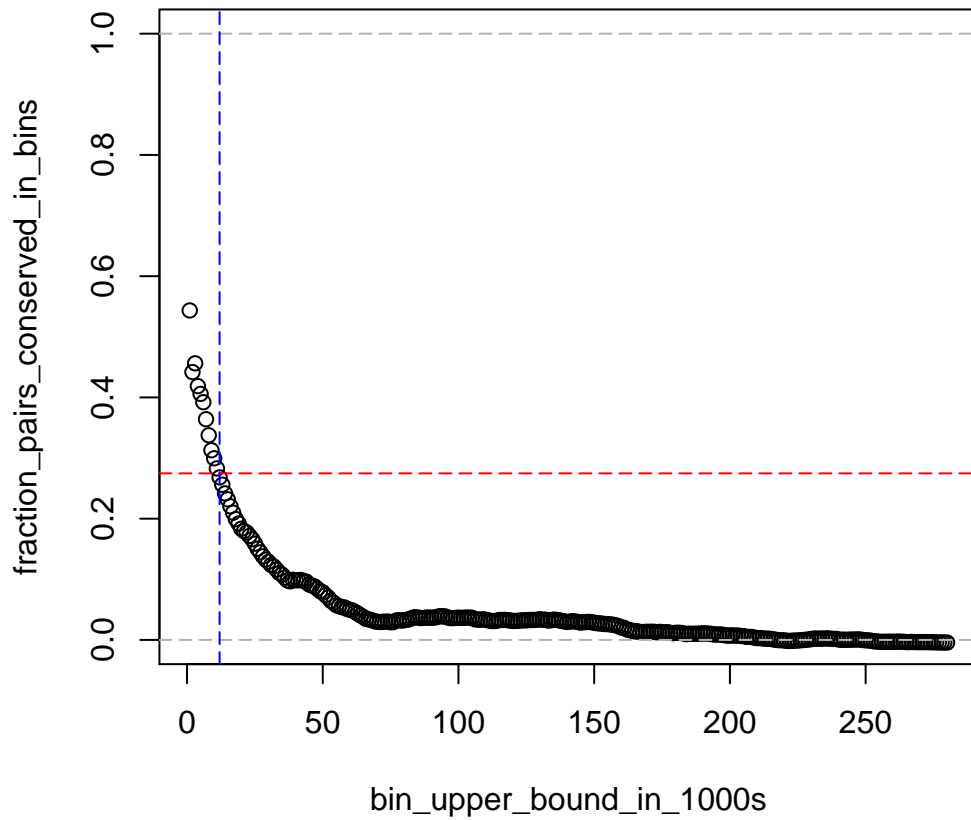

**Bin\_conservation\_minus\_bg\_Can0610SP\_vs\_CVR-1**  
**PD-0.457853**

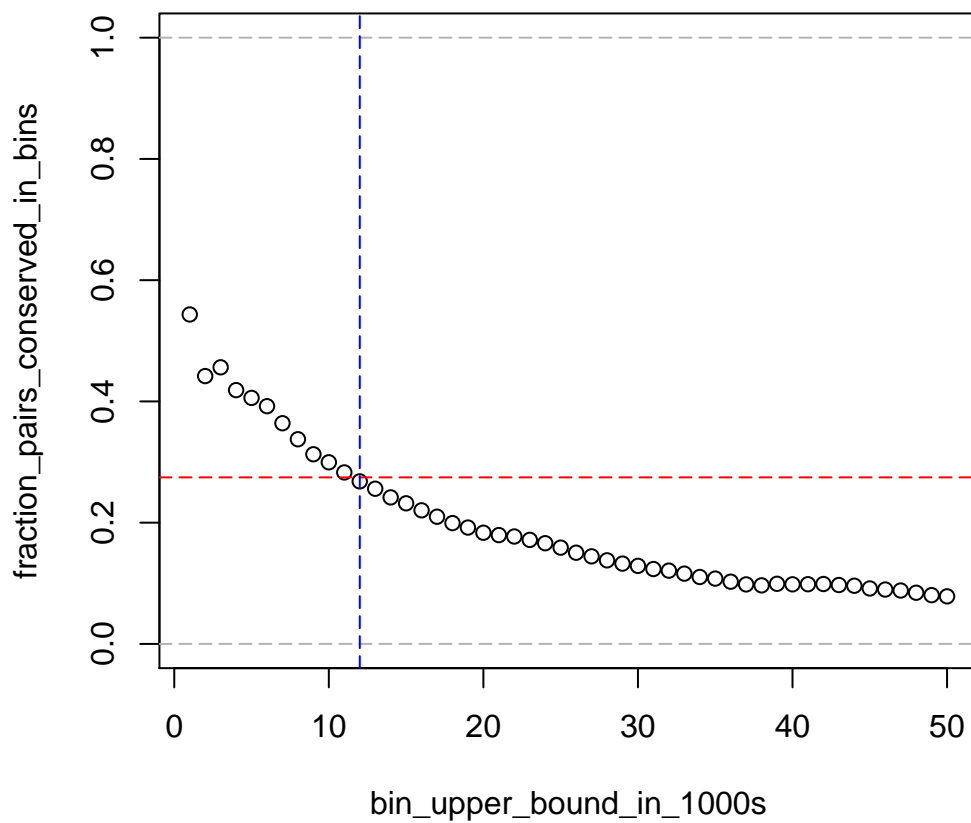

Supplement: s1 [file s1]

**Bin\_conservation\_minus\_bg\_AN69C\_vs\_MN0810.1**  
**PD-0.675947**

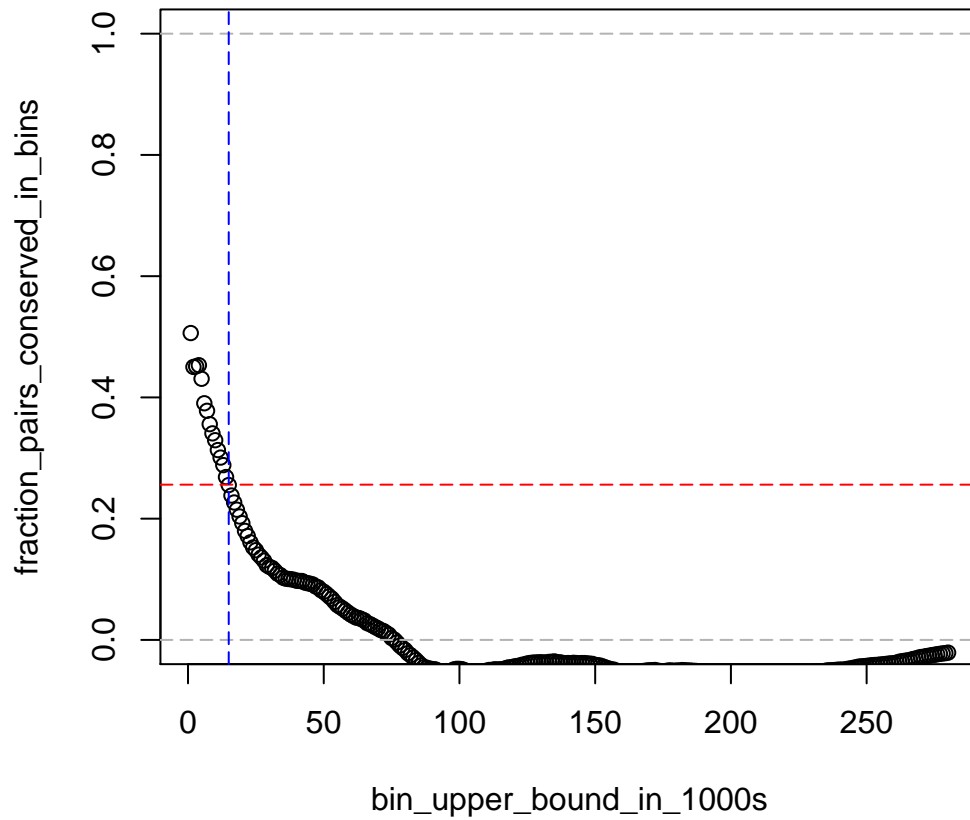

**Bin\_conservation\_minus\_bg\_AN69C\_vs\_MN0810.1**  
**PD-0.675947**

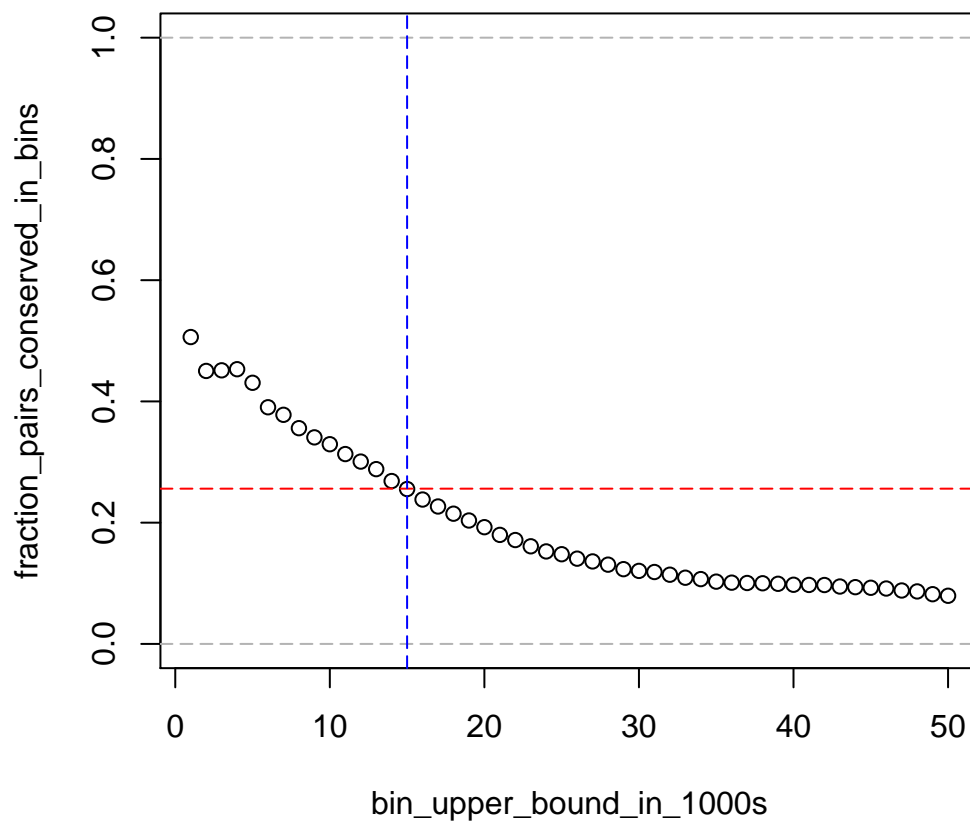

Supplement: s1 [file s1]

**Bin\_conservation\_minus\_bg\_Canal-1\_vs\_CvsA1**  
**PD-0.695232**

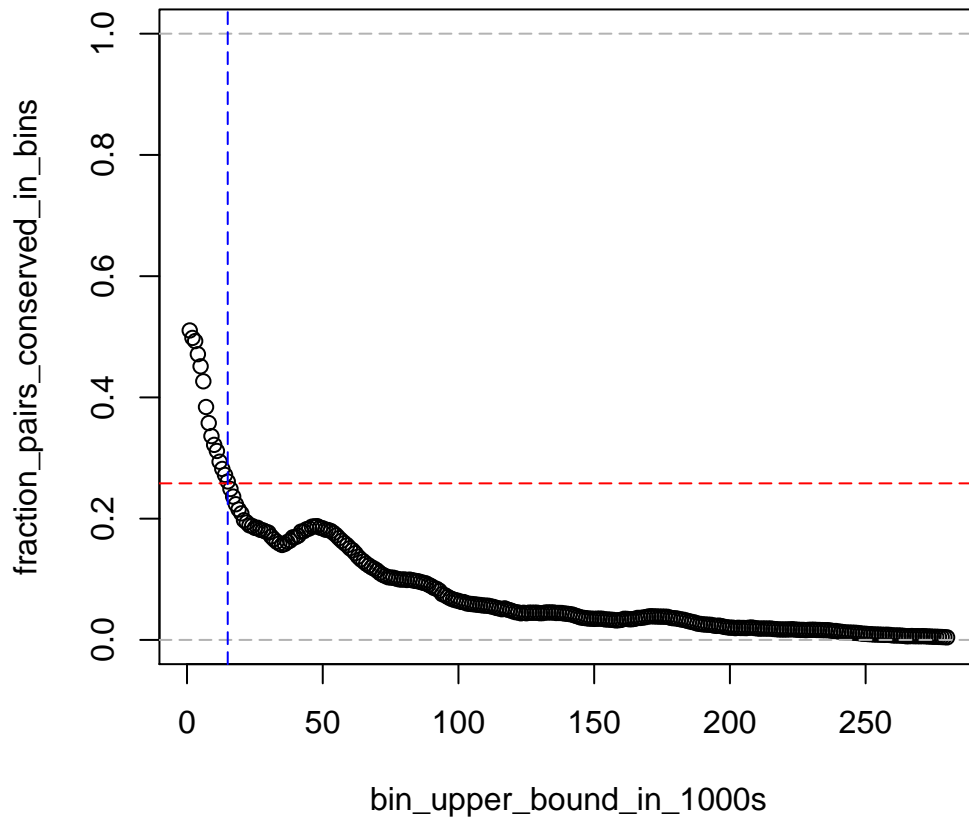

**Bin\_conservation\_minus\_bg\_Canal-1\_vs\_CvsA1**  
**PD-0.695232**

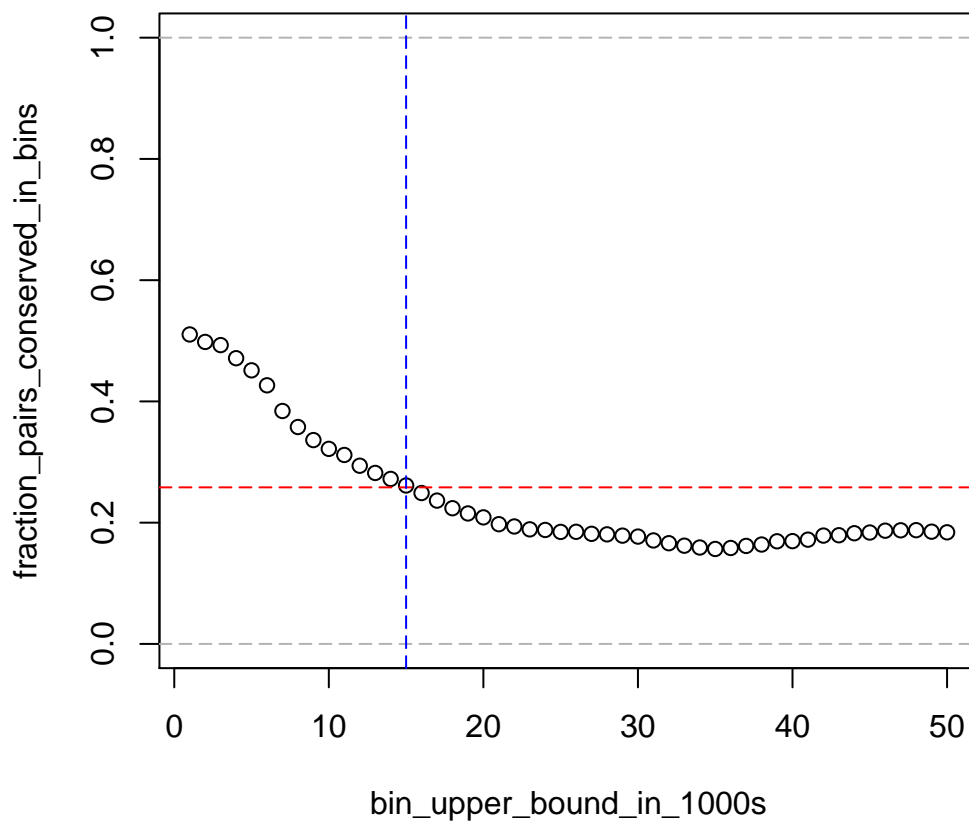

Supplement: s1 [file s1]

**Bin\_conservation\_minus\_bg\_Br0604L\_vs\_CVR-1**  
**PD-0.446879**

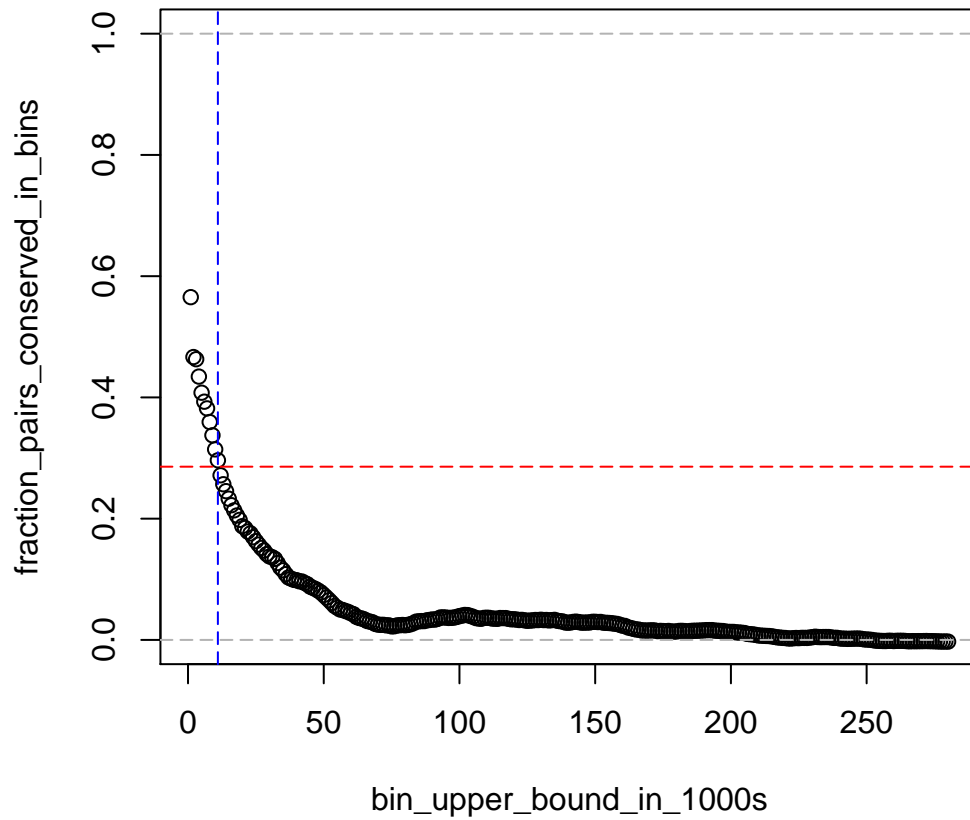

**Bin\_conservation\_minus\_bg\_Br0604L\_vs\_CVR-1**  
**PD-0.446879**

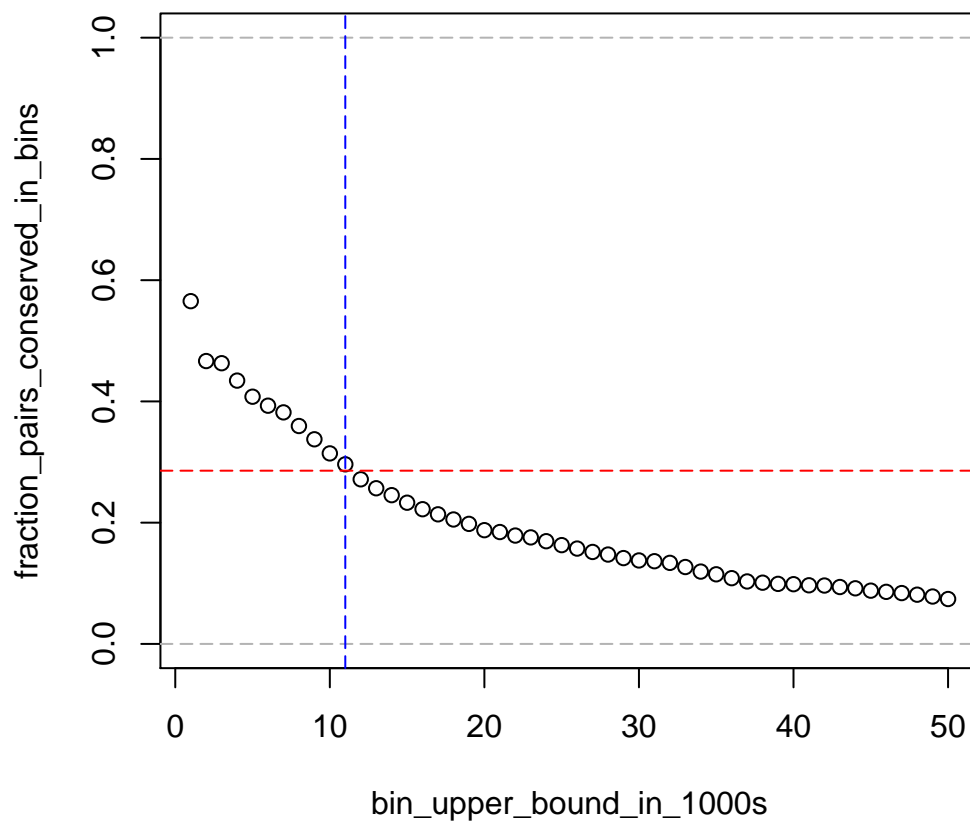

Supplement: s1 [file s1]

**Bin\_conservation\_minus\_bg\_Can18-4\_vs\_NE-JV-3**  
**PD-0.470355**

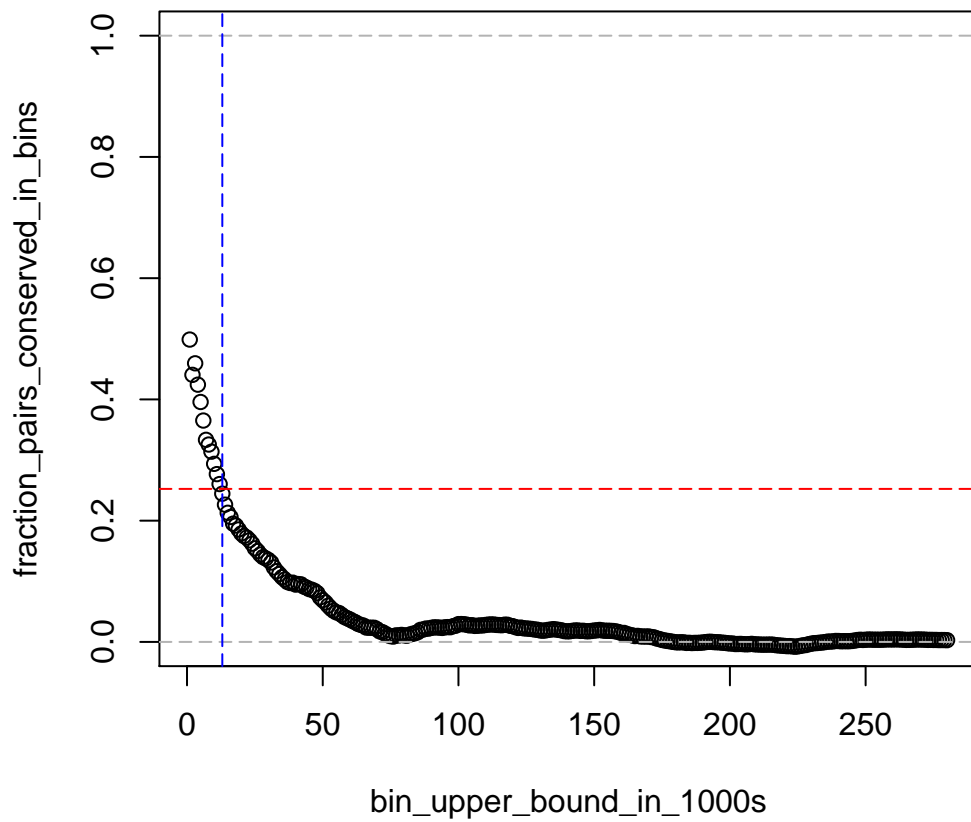

**Bin\_conservation\_minus\_bg\_Can18-4\_vs\_NE-JV-3**  
**PD-0.470355**

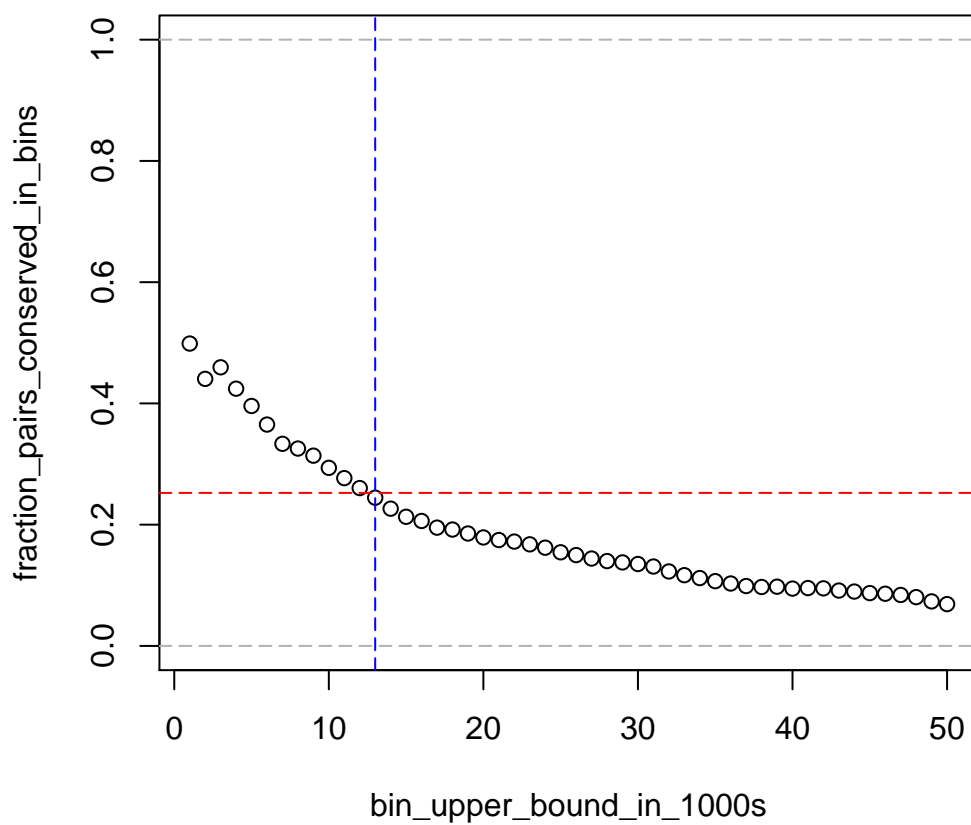

Supplement: s1 [file s1]

**Bin\_conservation\_minus\_bg\_CVG-1\_vs\_NTS-1**  
**PD-0.456805**

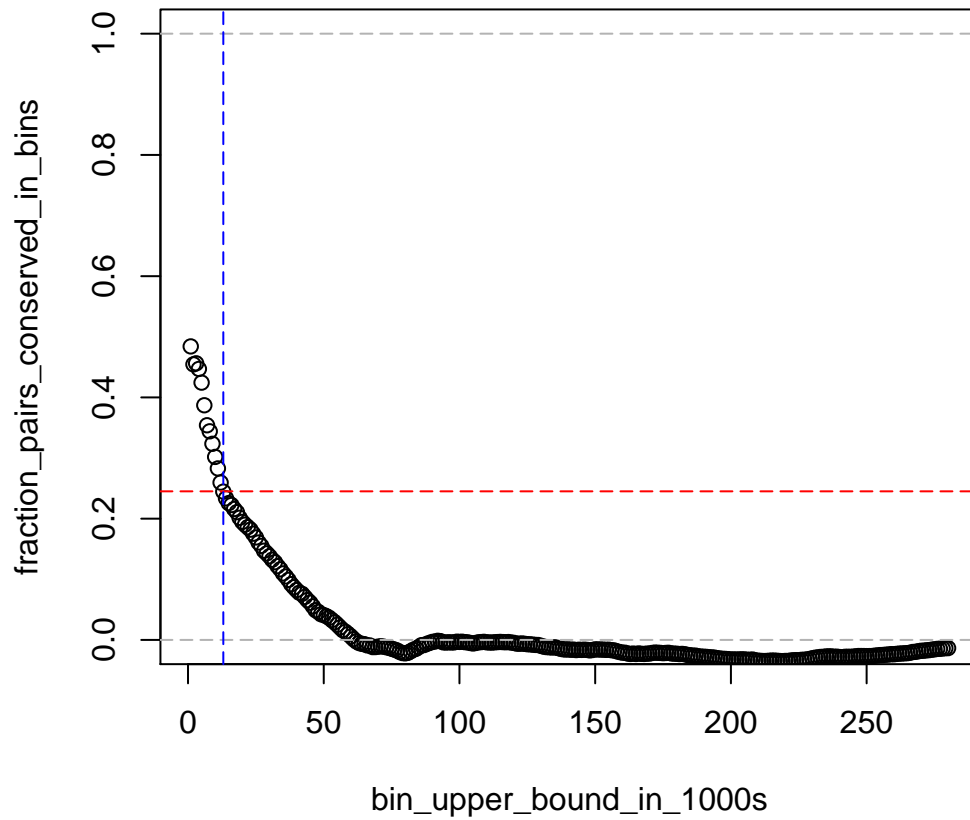

**Bin\_conservation\_minus\_bg\_CVG-1\_vs\_NTS-1**  
**PD-0.456805**

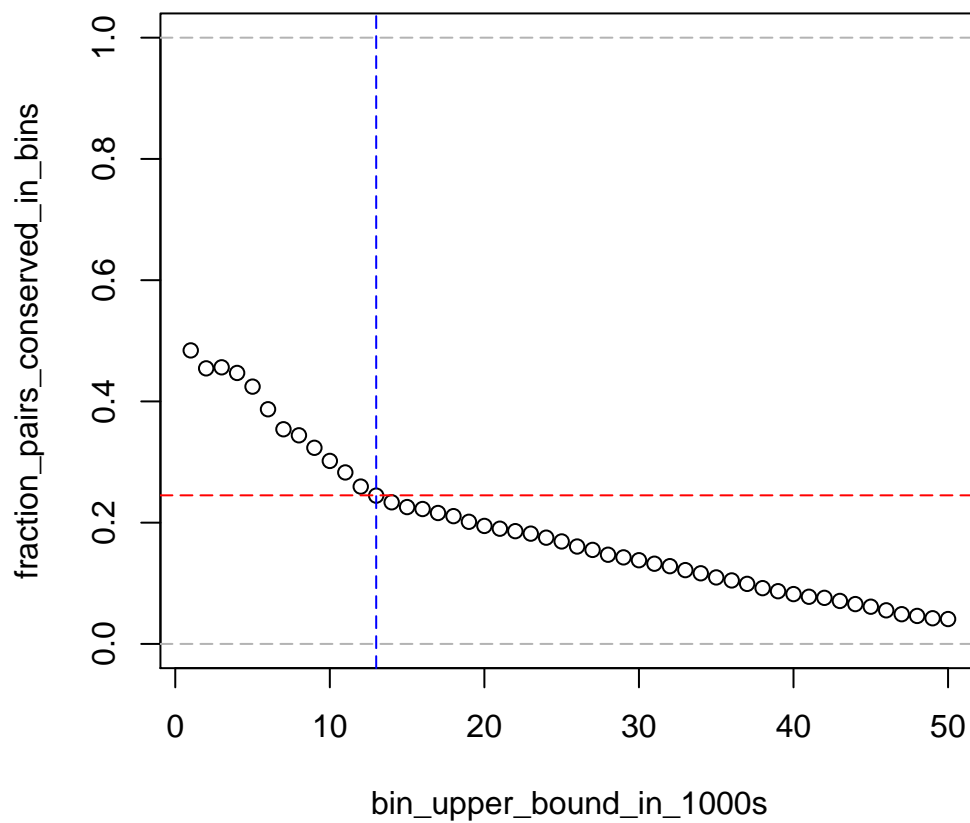

Supplement: s1 [file s1]

**Bin\_conservation\_minus\_bg\_IL-3A\_vs\_MA-1D**  
**PD-0.132707**

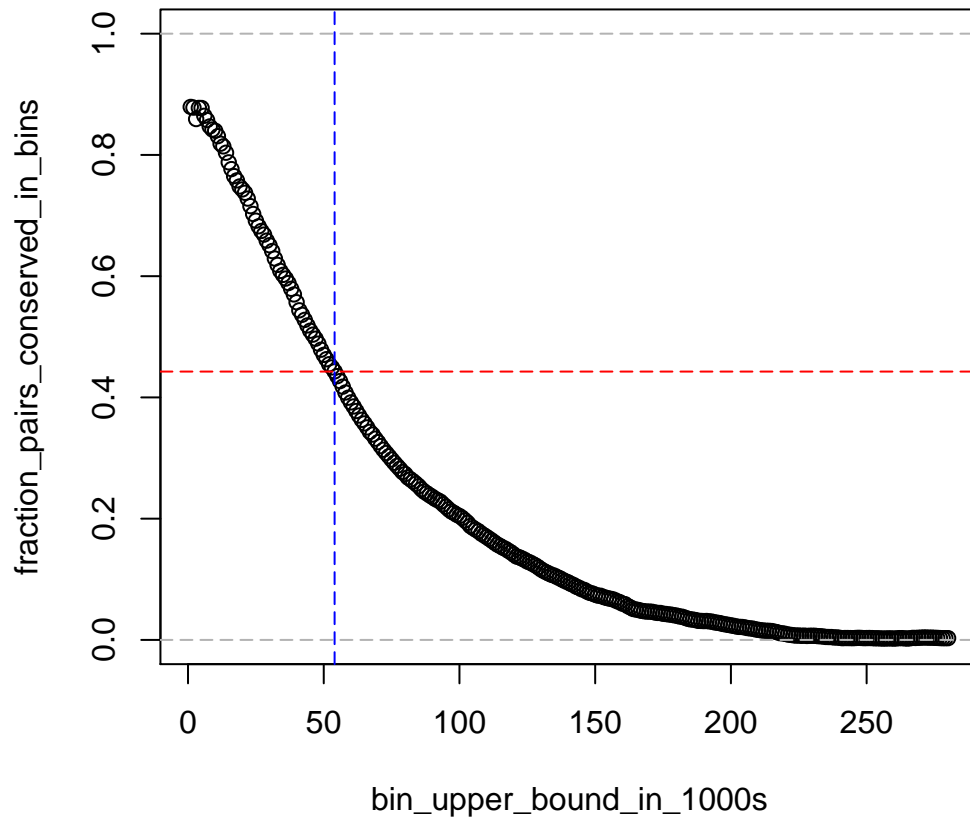

**Bin\_conservation\_minus\_bg\_IL-3A\_vs\_MA-1D**  
**PD-0.132707**

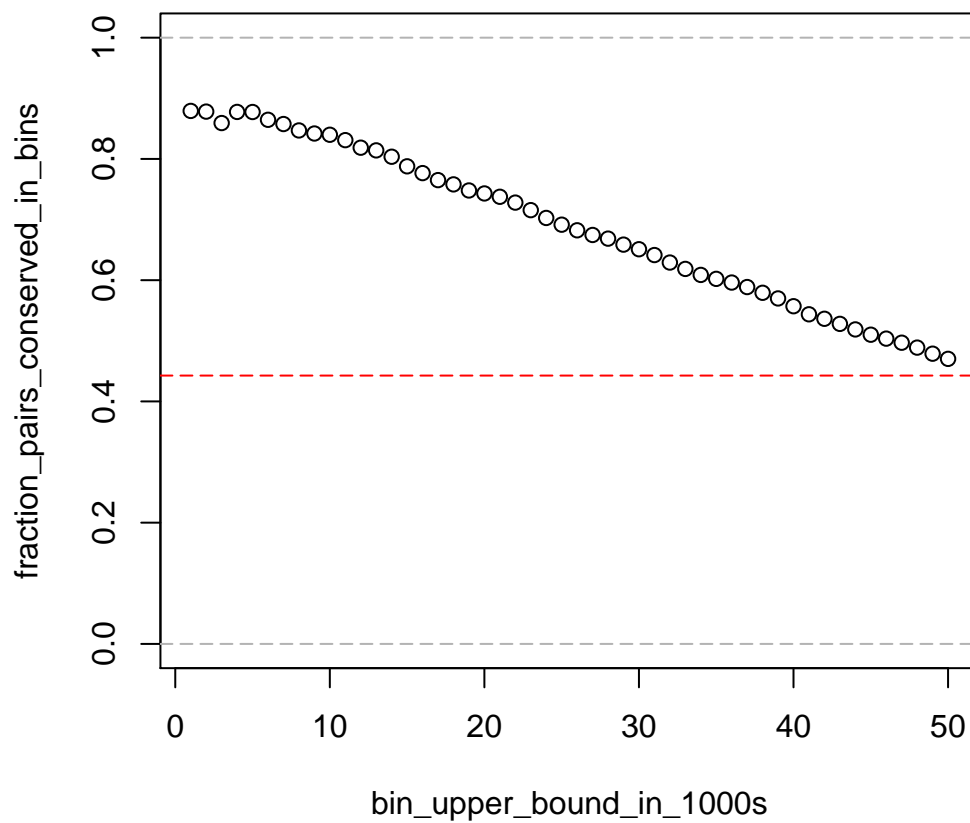

Supplement: s1 [file s1]

**Bin\_conservation\_minus\_bg\_AP110A\_vs\_Can0610SP**  
**PD-0.462802**

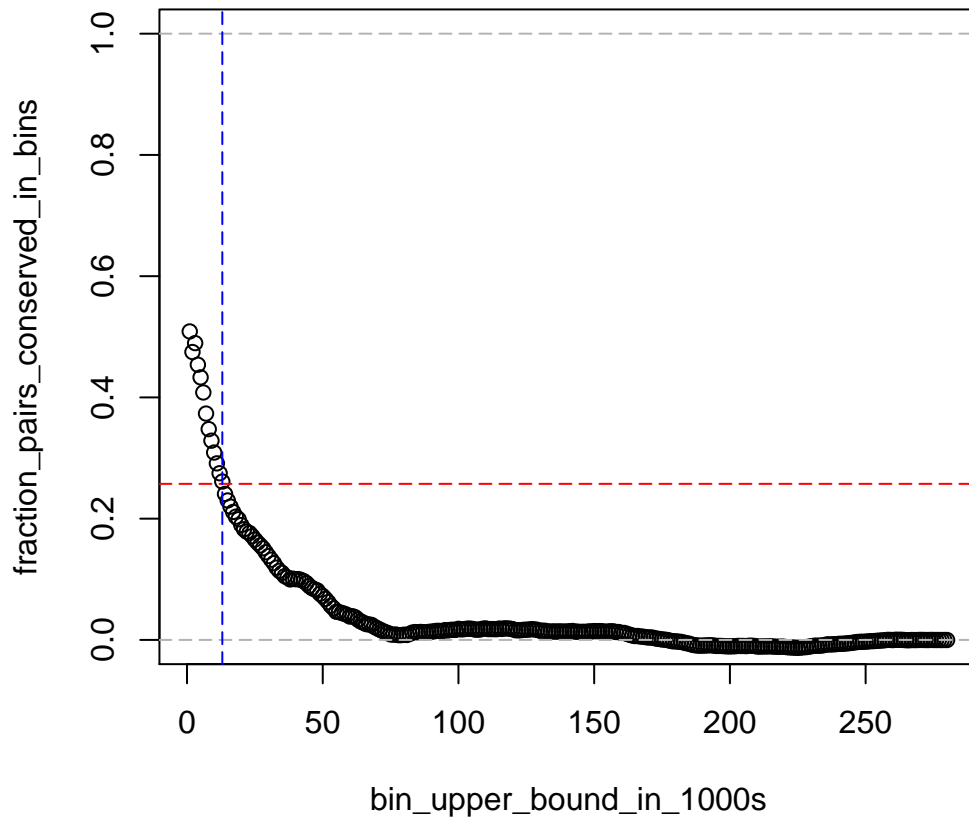

**Bin\_conservation\_minus\_bg\_AP110A\_vs\_Can0610SP**  
**PD-0.462802**

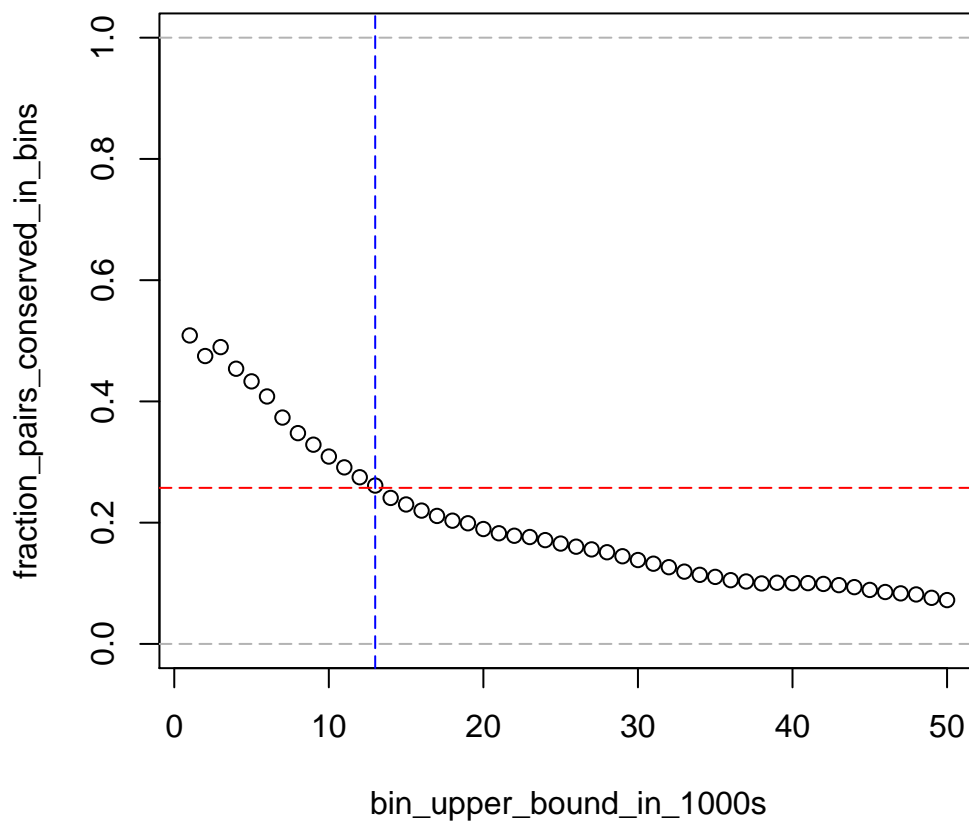

Supplement: s1 [file s1]

**Bin\_conservation\_minus\_bg\_PBCV1\_vs\_TN603.4.2**  
**PD-0.666413**

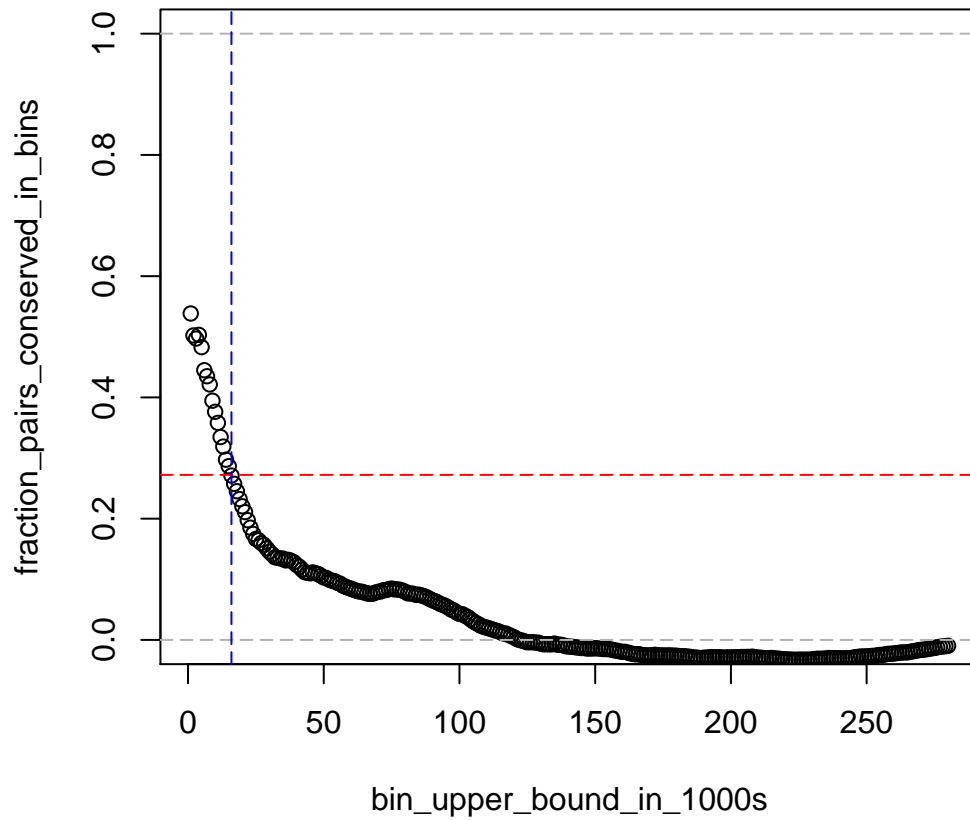

**Bin\_conservation\_minus\_bg\_PBCV1\_vs\_TN603.4.2**  
**PD-0.666413**

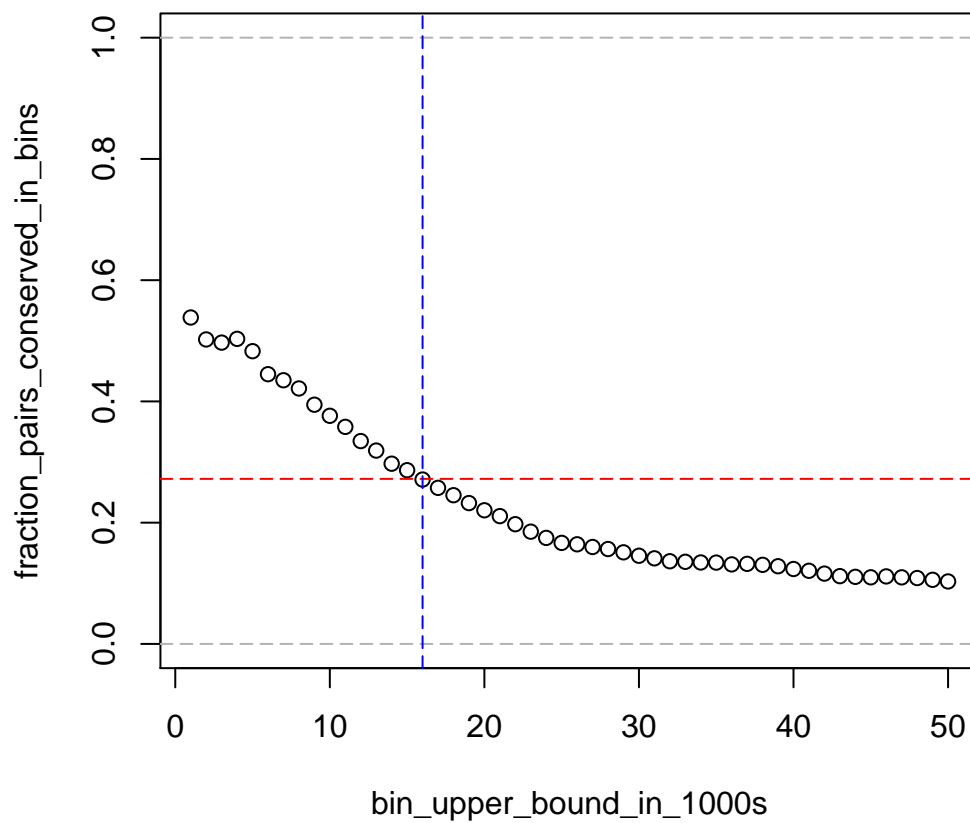

Supplement: s1 [file s1]

**Bin\_conservation\_minus\_bg\_CvsA1\_vs\_PBCV1**  
**PD-0.031071**

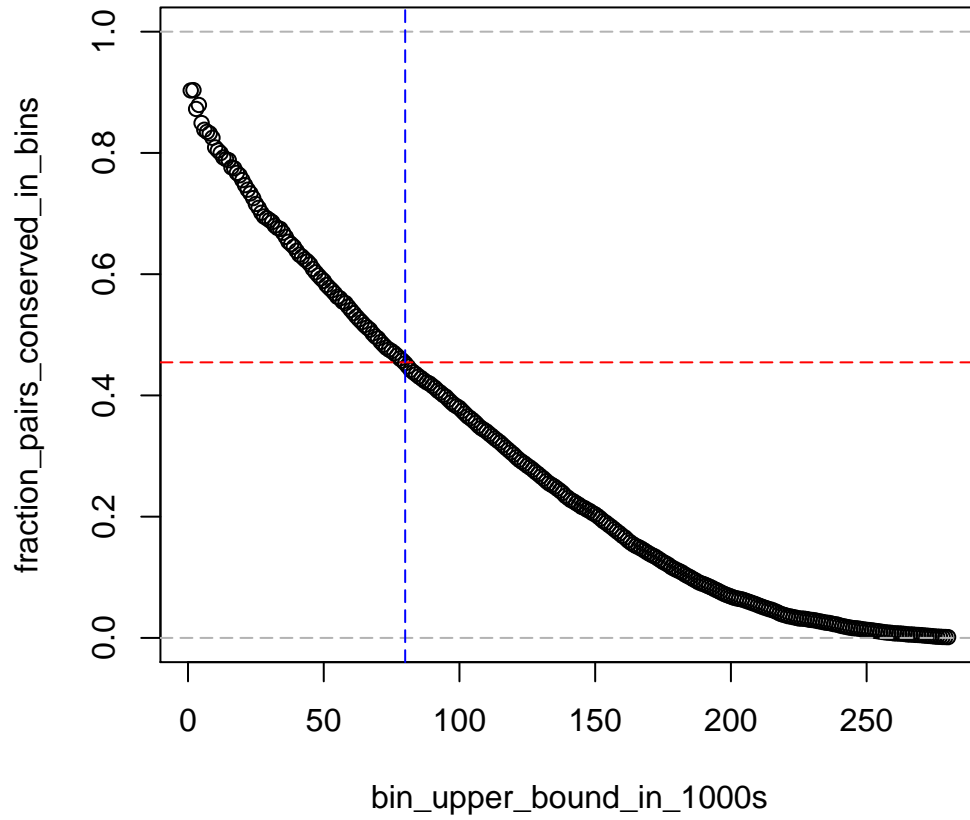

**Bin\_conservation\_minus\_bg\_CvsA1\_vs\_PBCV1**  
**PD-0.031071**

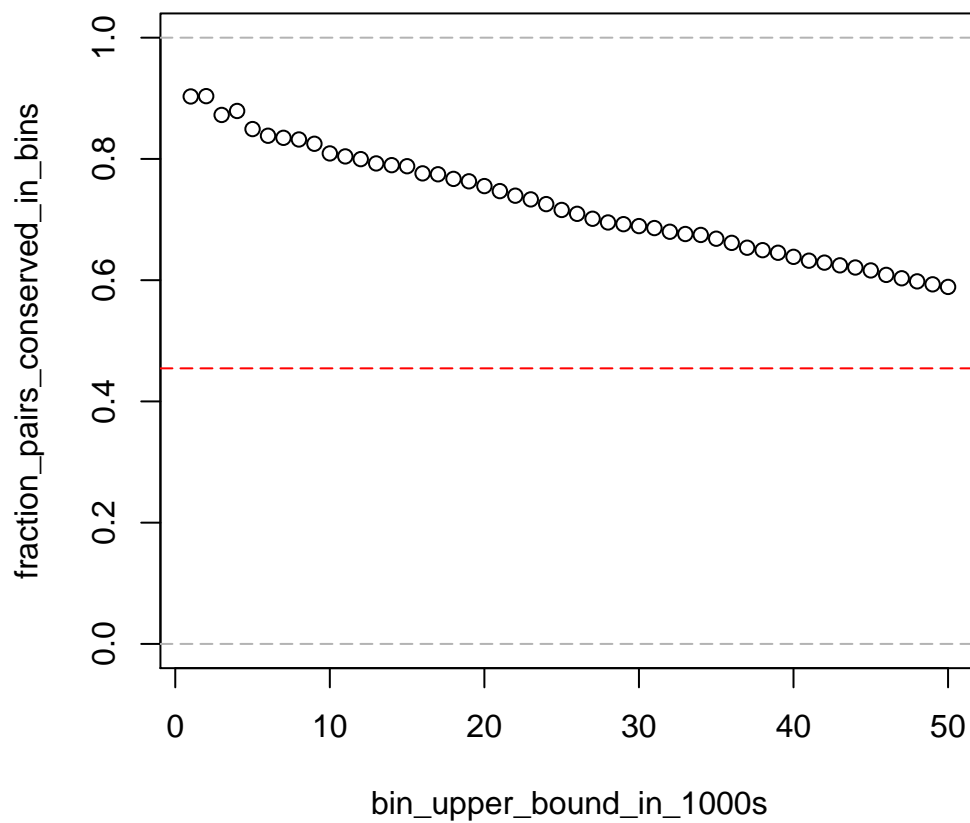

Supplement: s1 [file s1]

**Bin\_conservation\_minus\_bg\_MN0810.1\_vs\_NY-2B**  
**PD-0.703097**

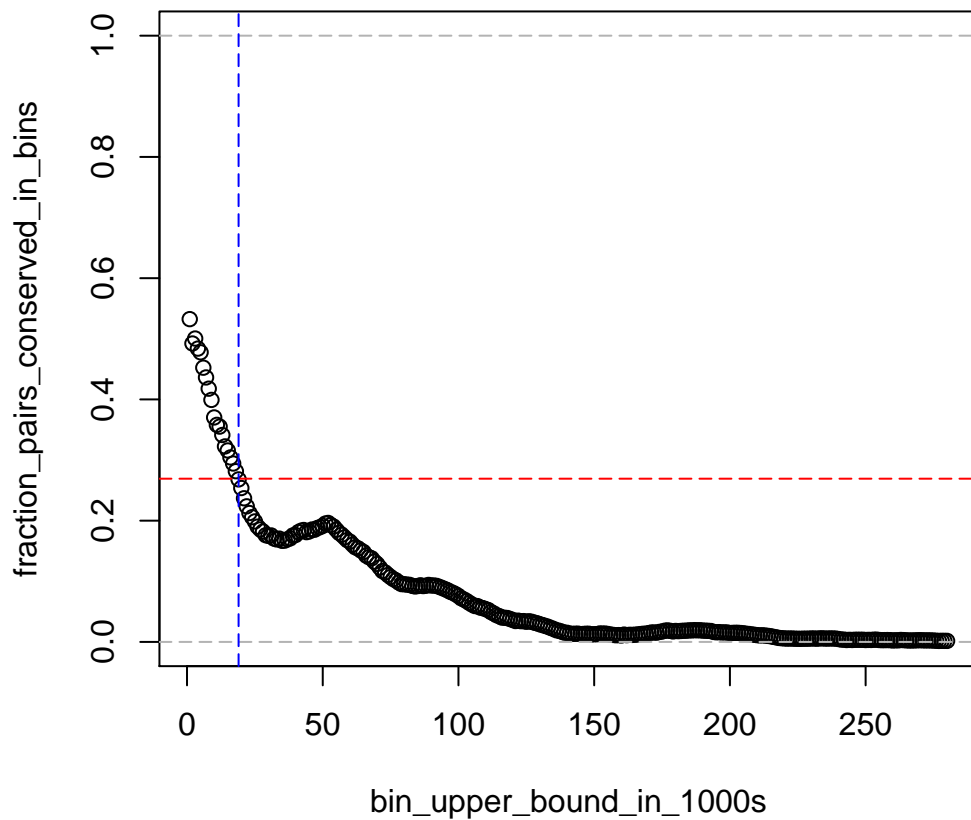

**Bin\_conservation\_minus\_bg\_MN0810.1\_vs\_NY-2B**  
**PD-0.703097**

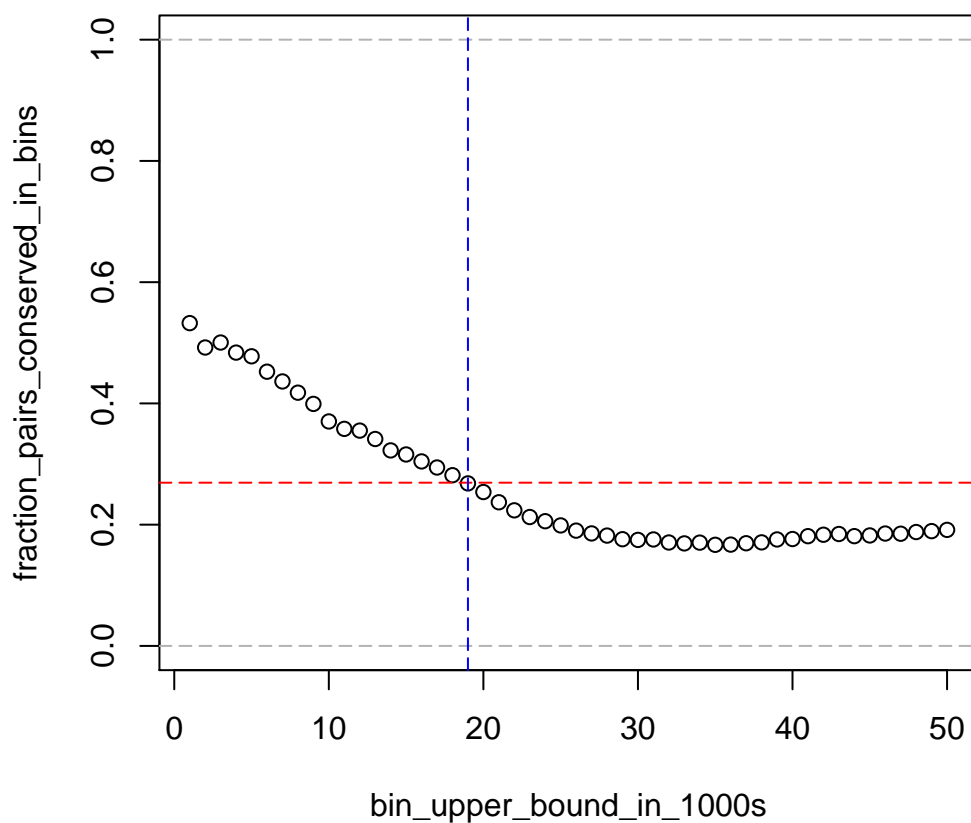

Supplement: s1 [file s1]

**Bin\_conservation\_minus\_bg\_IL-3A\_vs\_MA-1E**  
**PD-0.014728**

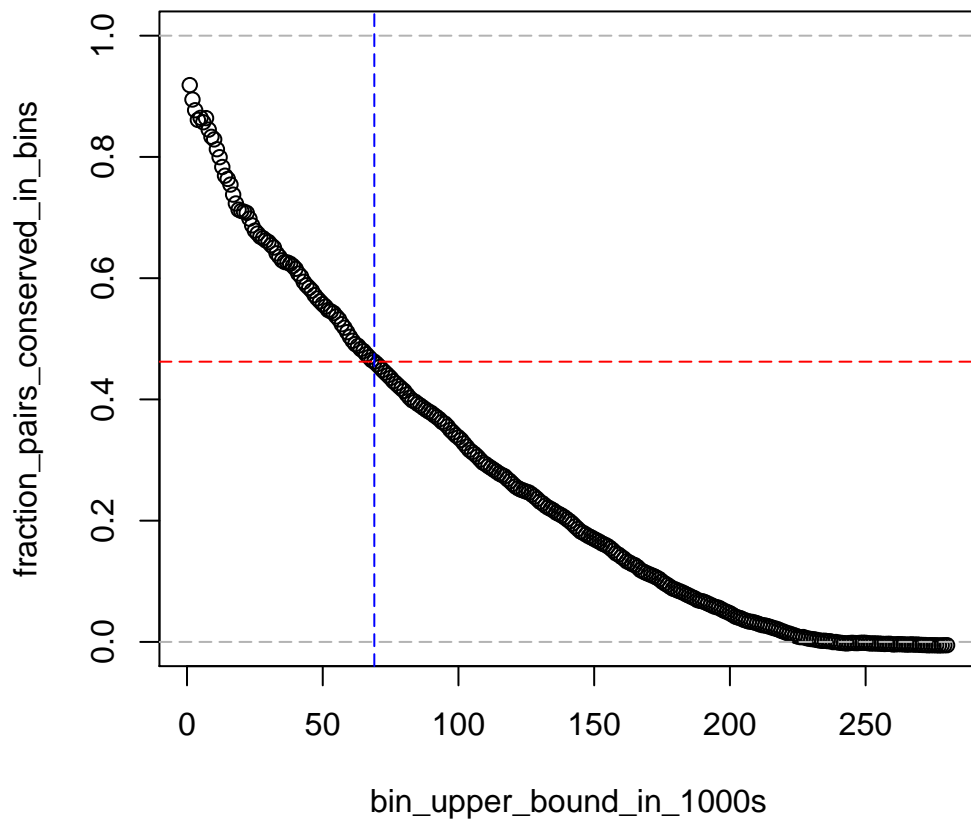

**Bin\_conservation\_minus\_bg\_IL-3A\_vs\_MA-1E**  
**PD-0.014728**

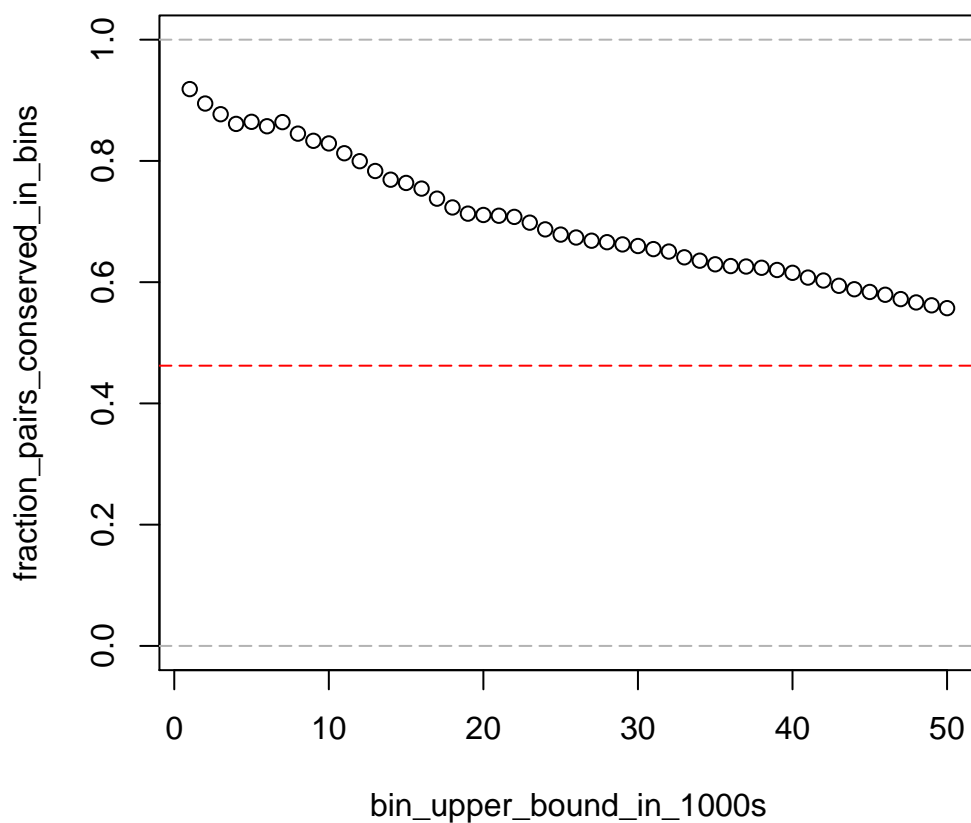

Supplement: s1 [file s1]

**Bin\_conservation\_minus\_bg\_AP110A\_vs\_IL-5-2s1**  
**PD-0.663832**

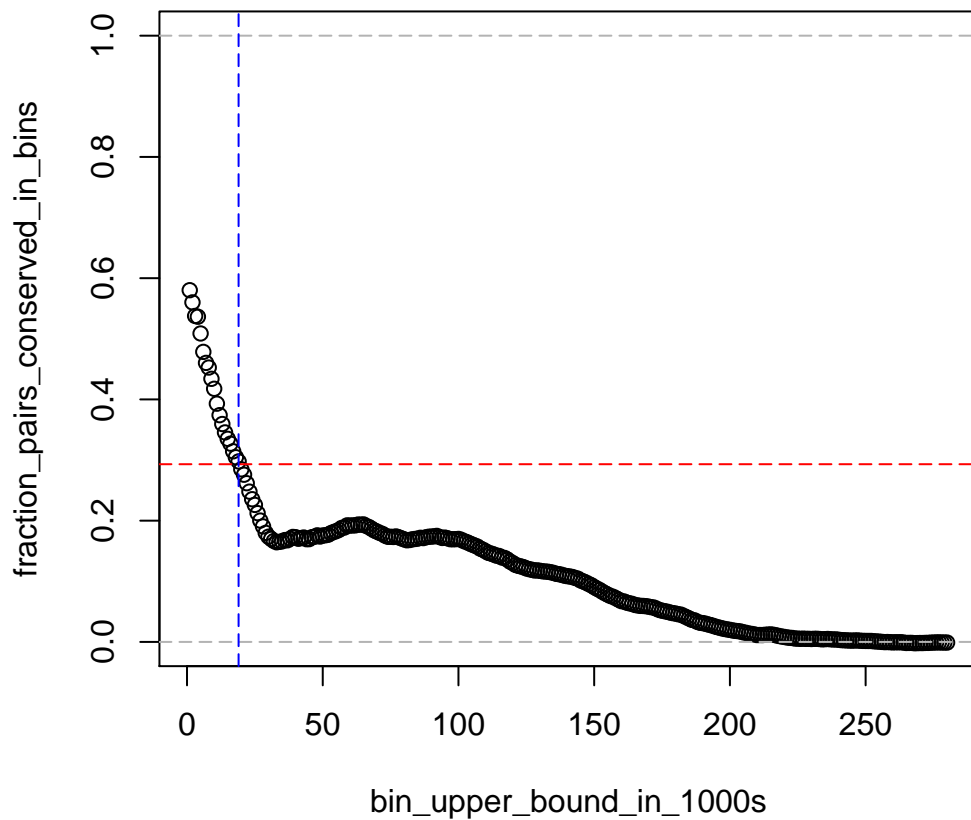

**Bin\_conservation\_minus\_bg\_AP110A\_vs\_IL-5-2s1**  
**PD-0.663832**

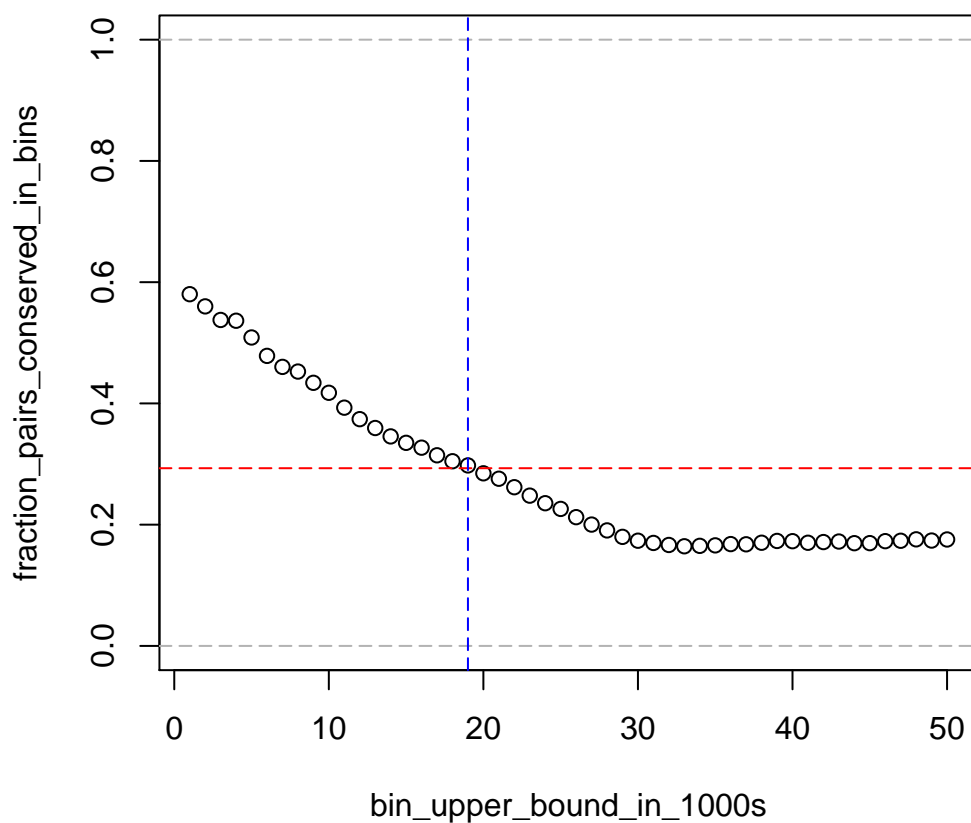

Supplement: s1 [file s1]

**Bin\_conservation\_minus\_bg\_Can0610SP\_vs\_NYs-1**  
**PD-0.702897**

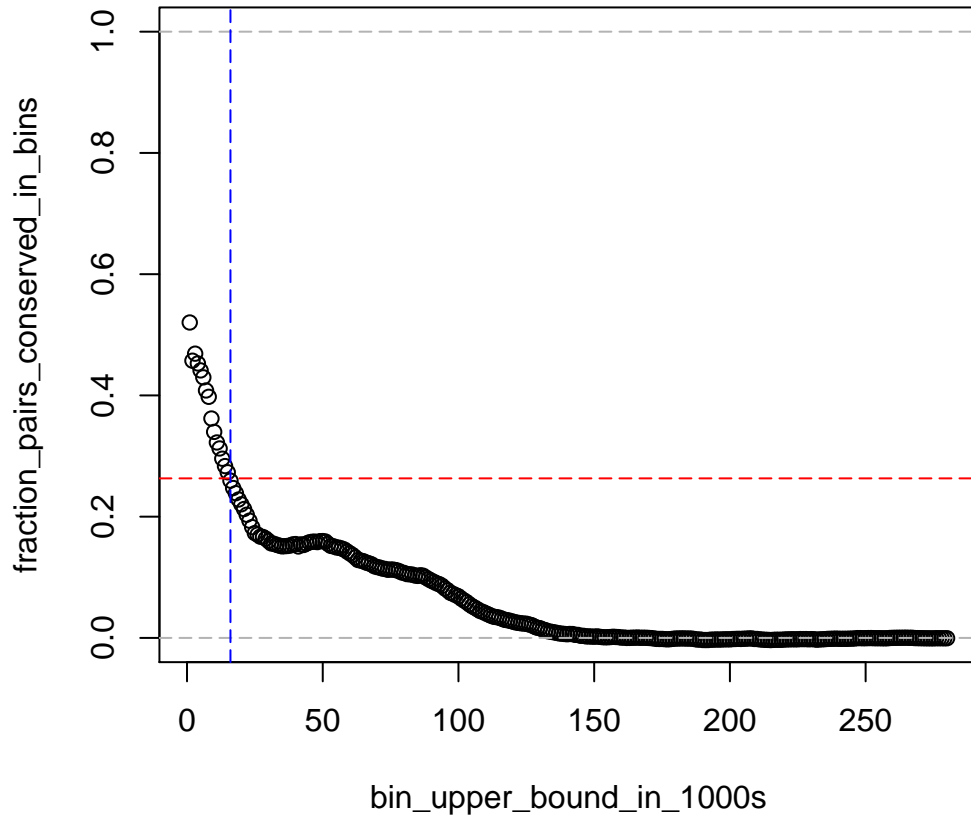

**Bin\_conservation\_minus\_bg\_Can0610SP\_vs\_NYs-1**  
**PD-0.702897**

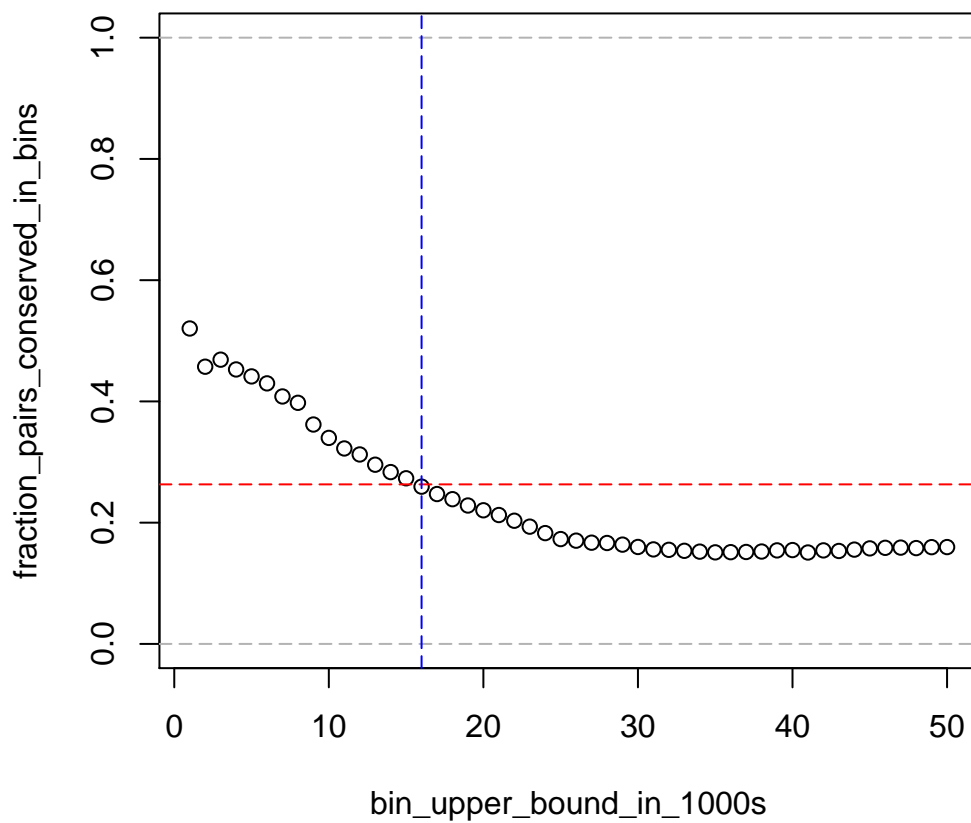

Supplement: s1 [file s1]

**Bin\_conservation\_minus\_bg\_CVM-1\_vs\_IL-5-2s1**  
**PD-0.660656**

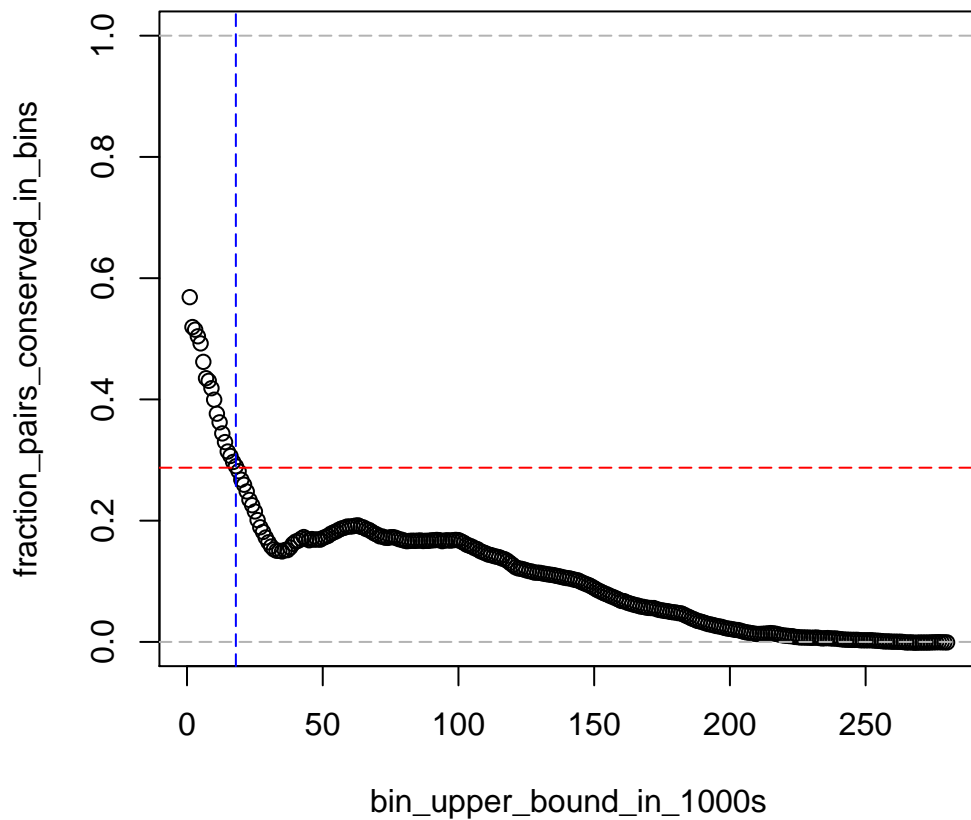

**Bin\_conservation\_minus\_bg\_CVM-1\_vs\_IL-5-2s1**  
**PD-0.660656**

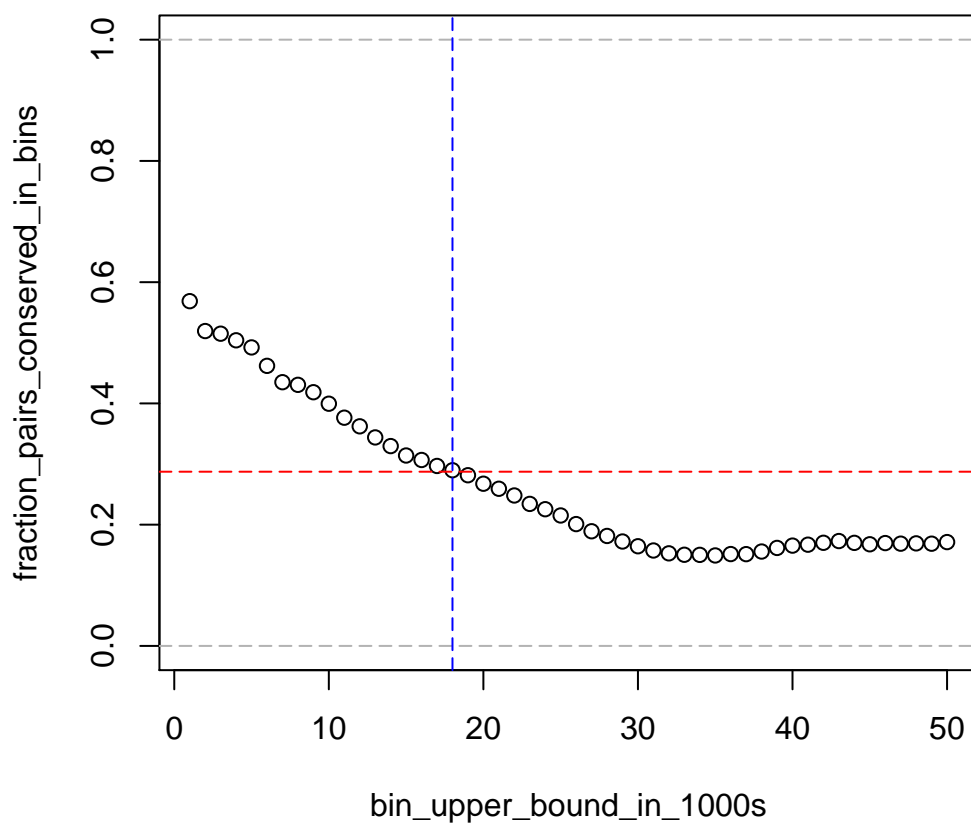

Supplement: s1 [file s1]

**Bin\_conservation\_minus\_bg\_AR158\_vs\_ATCV1**  
**PD-0.704765**

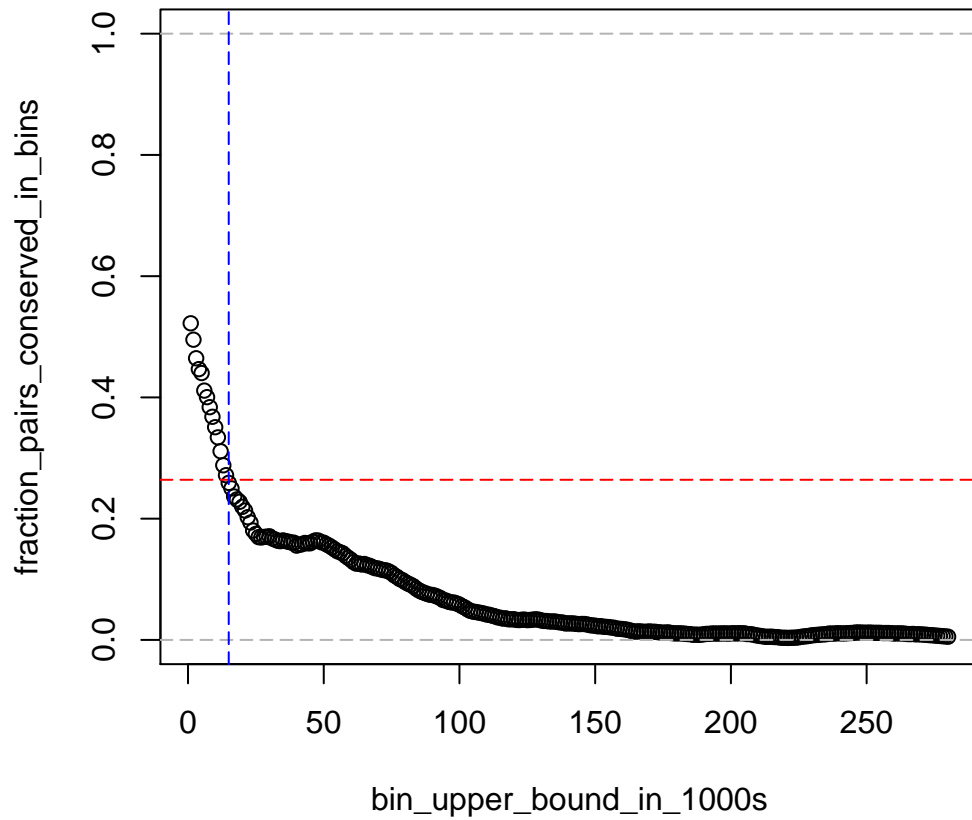

**Bin\_conservation\_minus\_bg\_AR158\_vs\_ATCV1**  
**PD-0.704765**

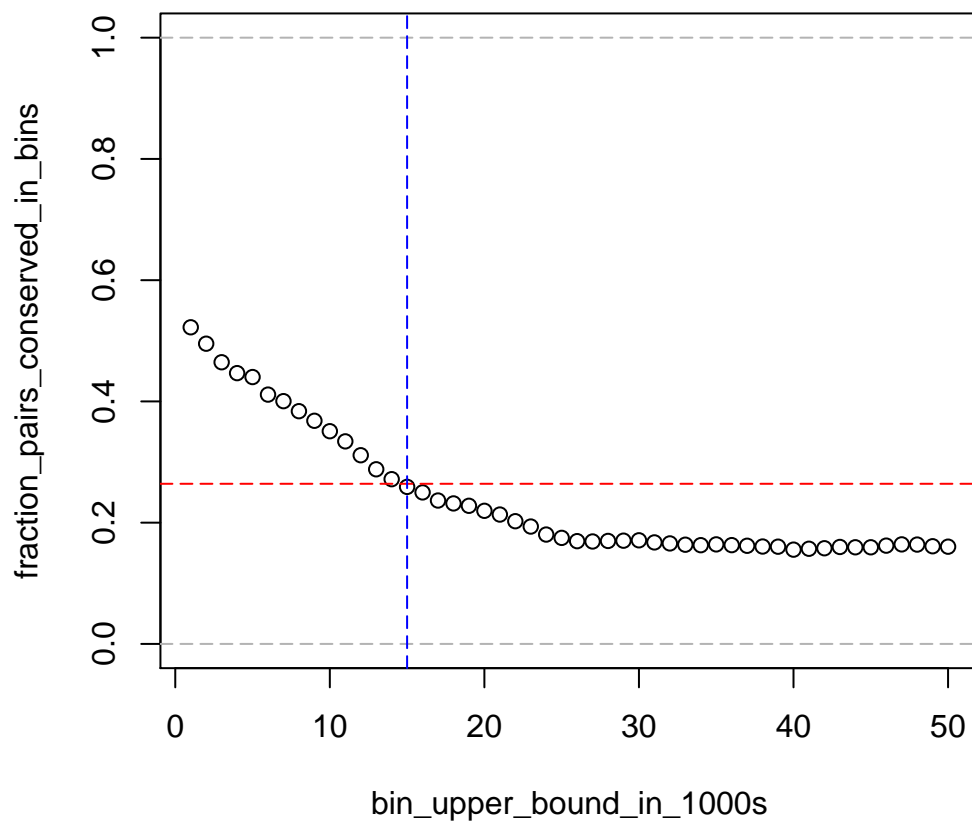

Supplement: s1 [file s1]

**Bin\_conservation\_minus\_bg\_NE-JV-3\_vs\_TN603.4.2**  
**PD-0.06235**

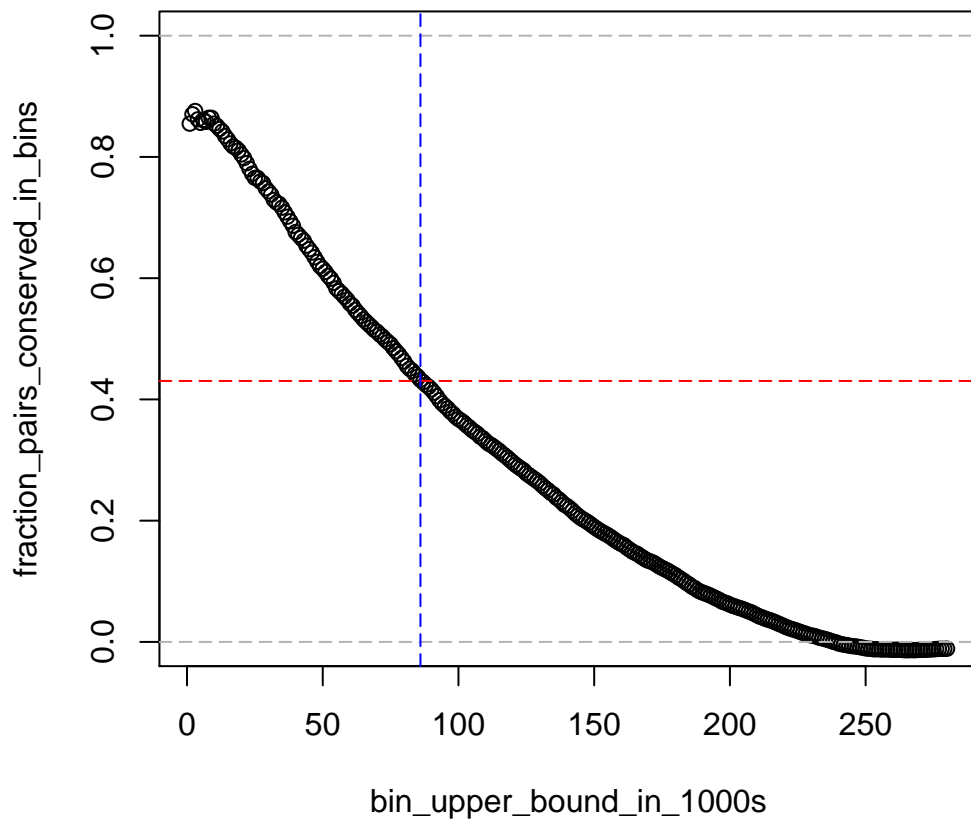

**Bin\_conservation\_minus\_bg\_NE-JV-3\_vs\_TN603.4.2**  
**PD-0.06235**

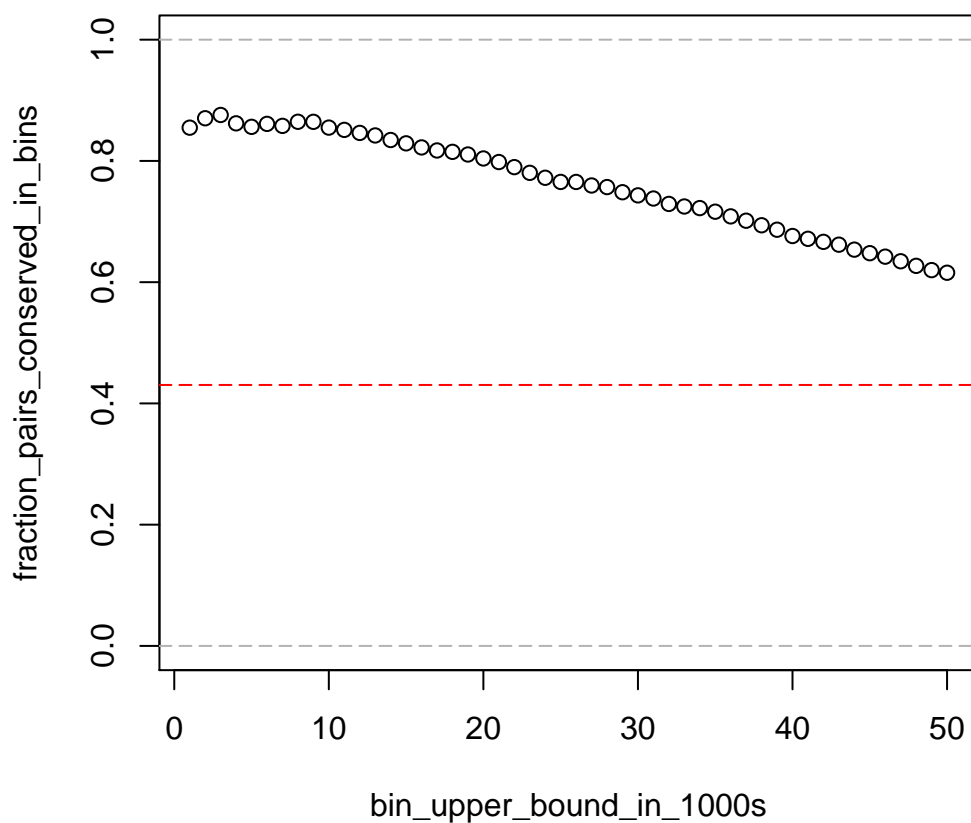

Supplement: s1 [file s1]

**Bin\_conservation\_minus\_bg\_Can0610SP\_vs\_IL-5-2s1**  
**PD-0.703612**

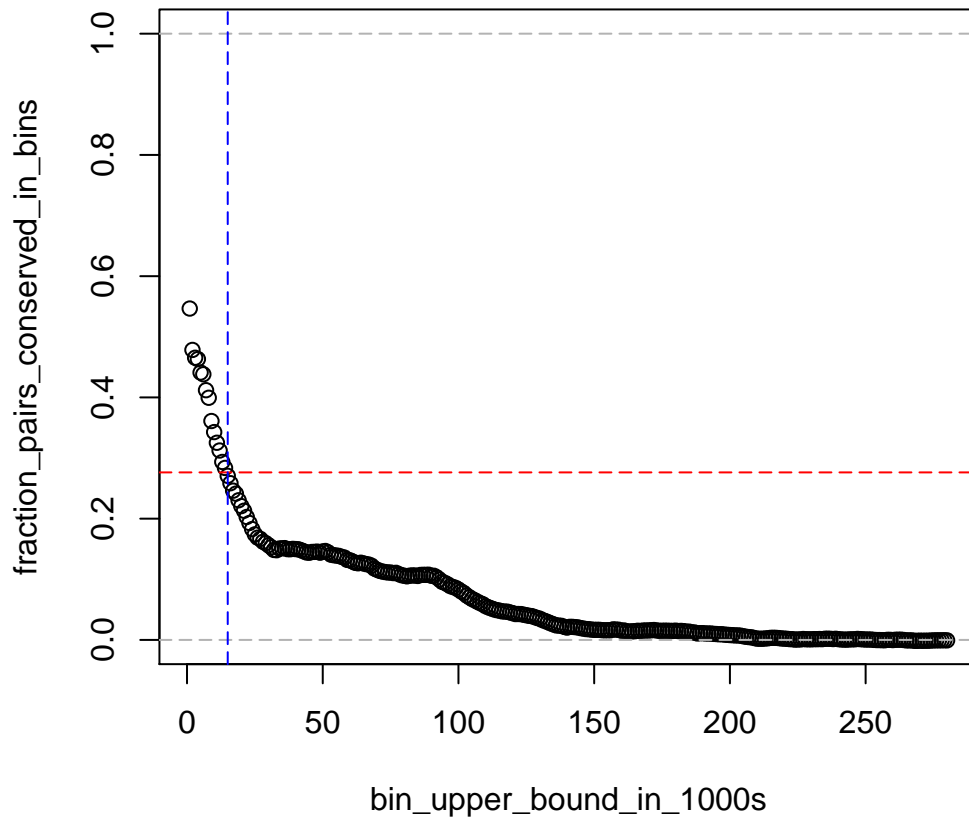

**Bin\_conservation\_minus\_bg\_Can0610SP\_vs\_IL-5-2s1**  
**PD-0.703612**

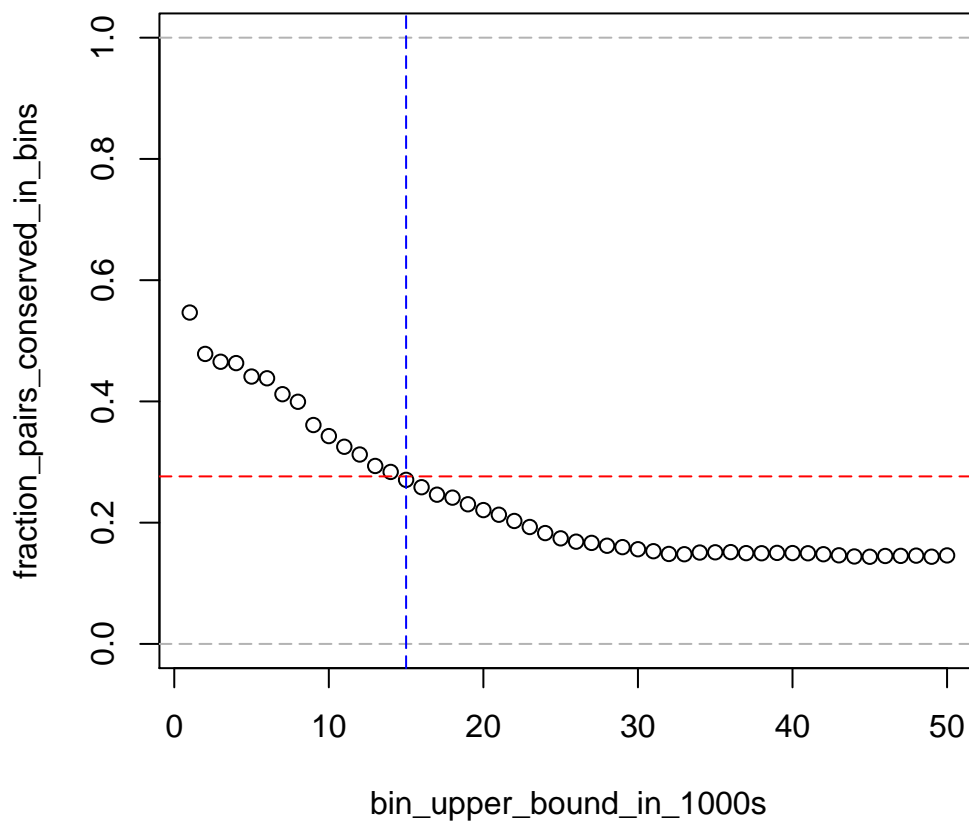

Supplement: s1 [file s1]

**Bin\_conservation\_minus\_bg\_CZ-2\_vs\_MT325**  
**PD-0.040627**

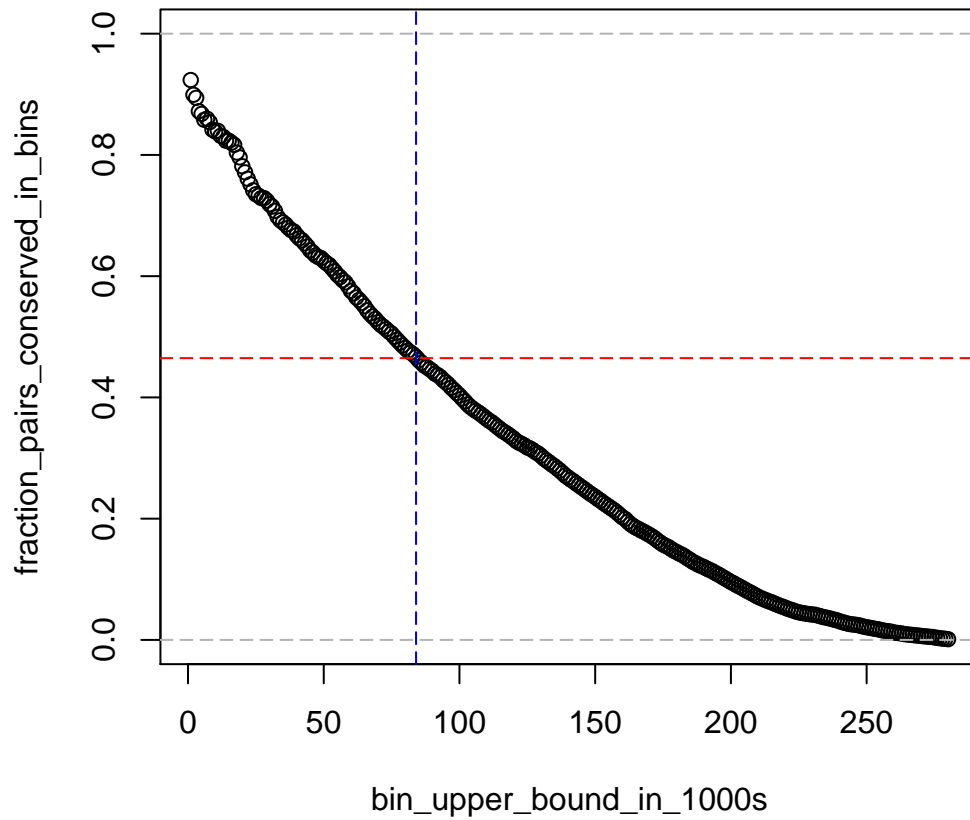

**Bin\_conservation\_minus\_bg\_CZ-2\_vs\_MT325**  
**PD-0.040627**

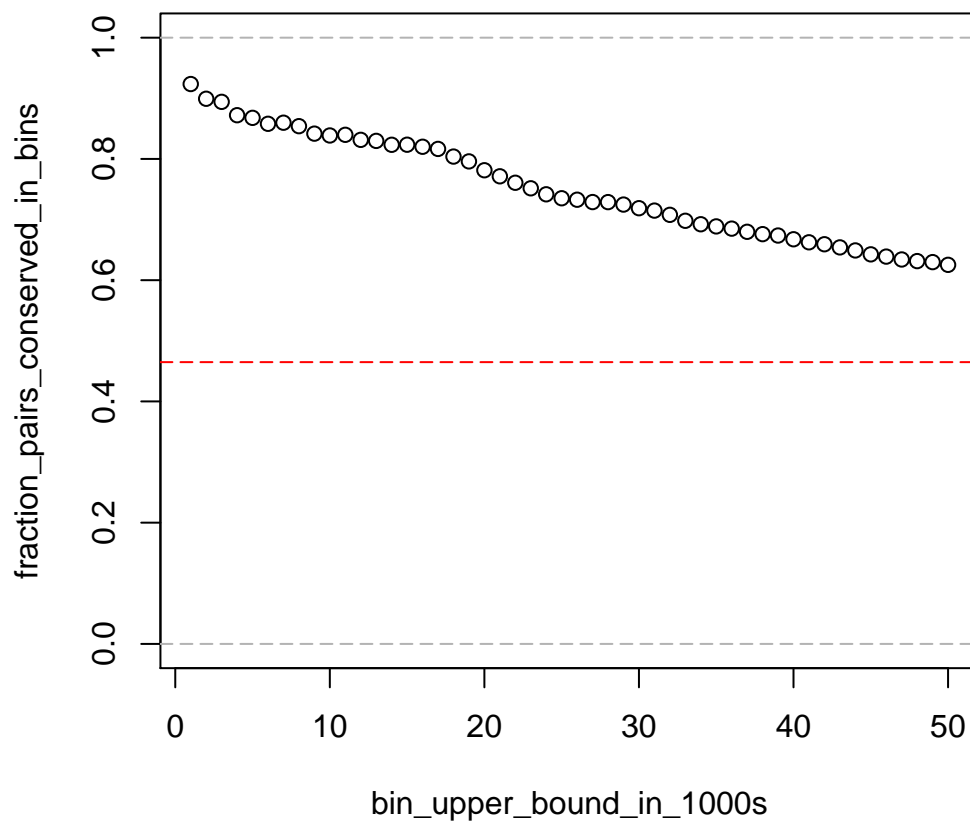

Supplement: s1 [file s1]

**Bin\_conservation\_minus\_bg\_CVB-1\_vs\_MN0810.1**  
**PD-0.473621**

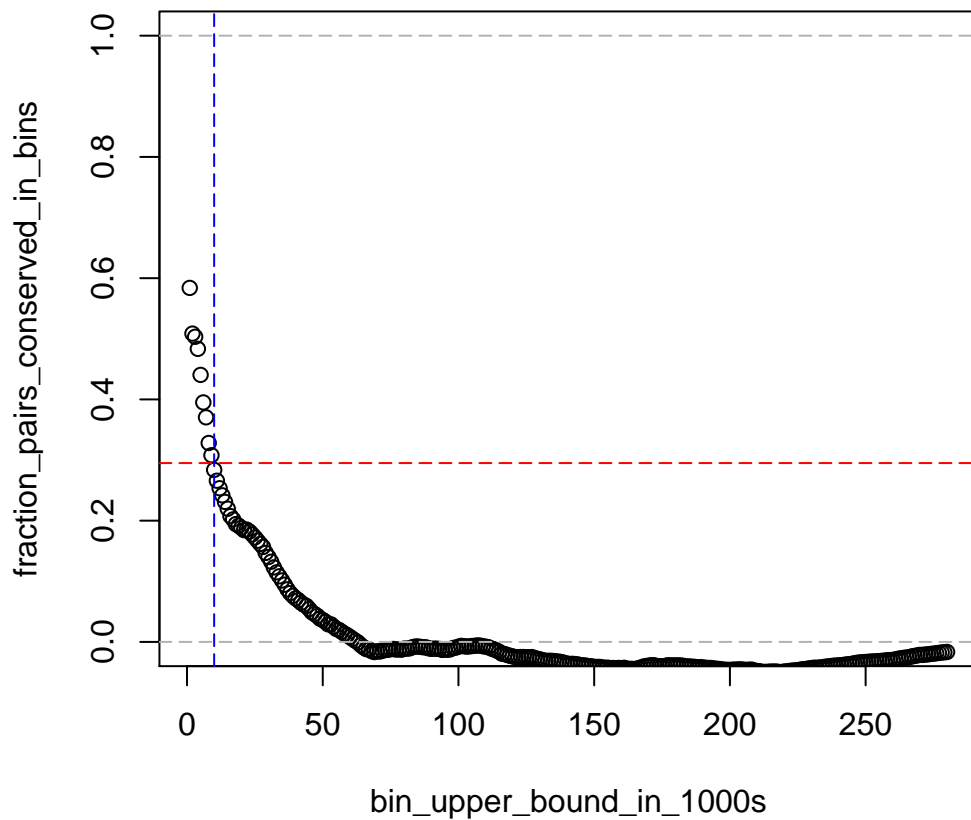

**Bin\_conservation\_minus\_bg\_CVB-1\_vs\_MN0810.1**  
**PD-0.473621**

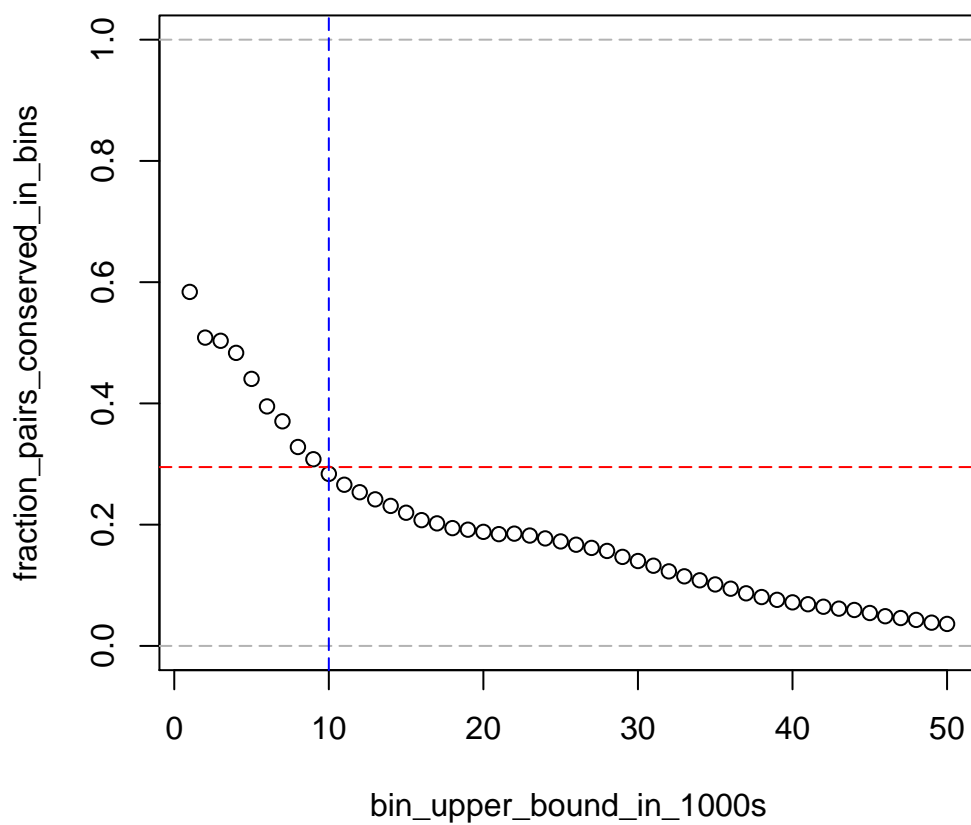

Supplement: s1 [file s1]

**Bin\_conservation\_minus\_bg\_MO0605SPH\_vs\_PBCV1**  
**PD-0.68027**

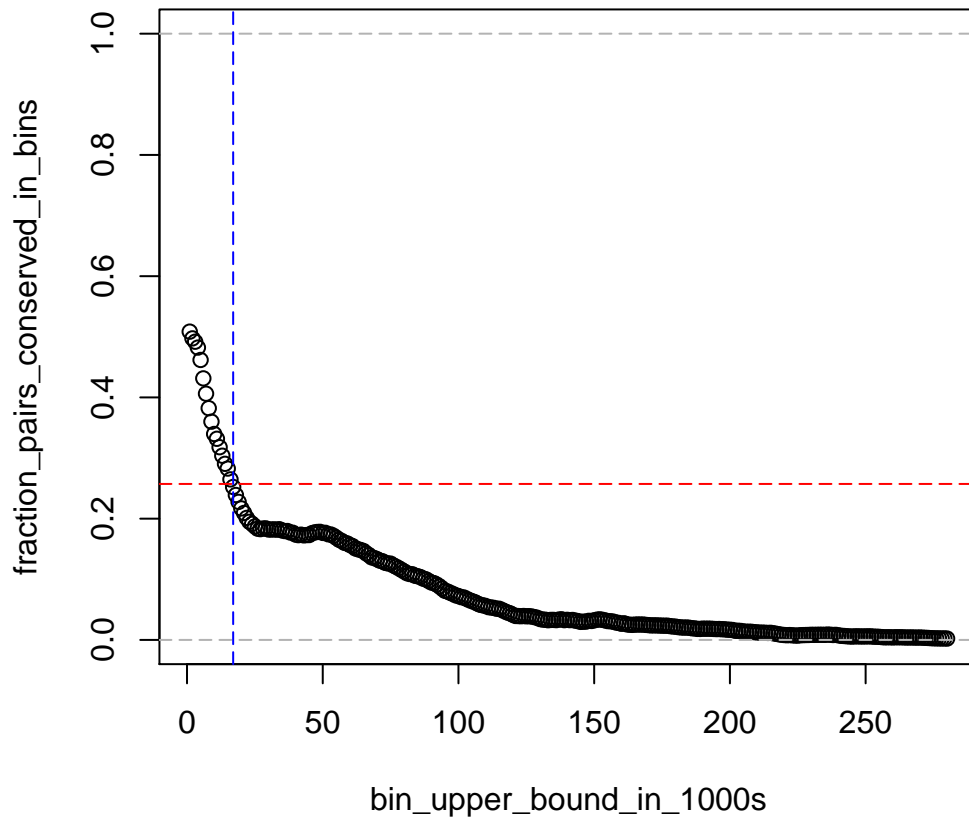

**Bin\_conservation\_minus\_bg\_MO0605SPH\_vs\_PBCV1**  
**PD-0.68027**

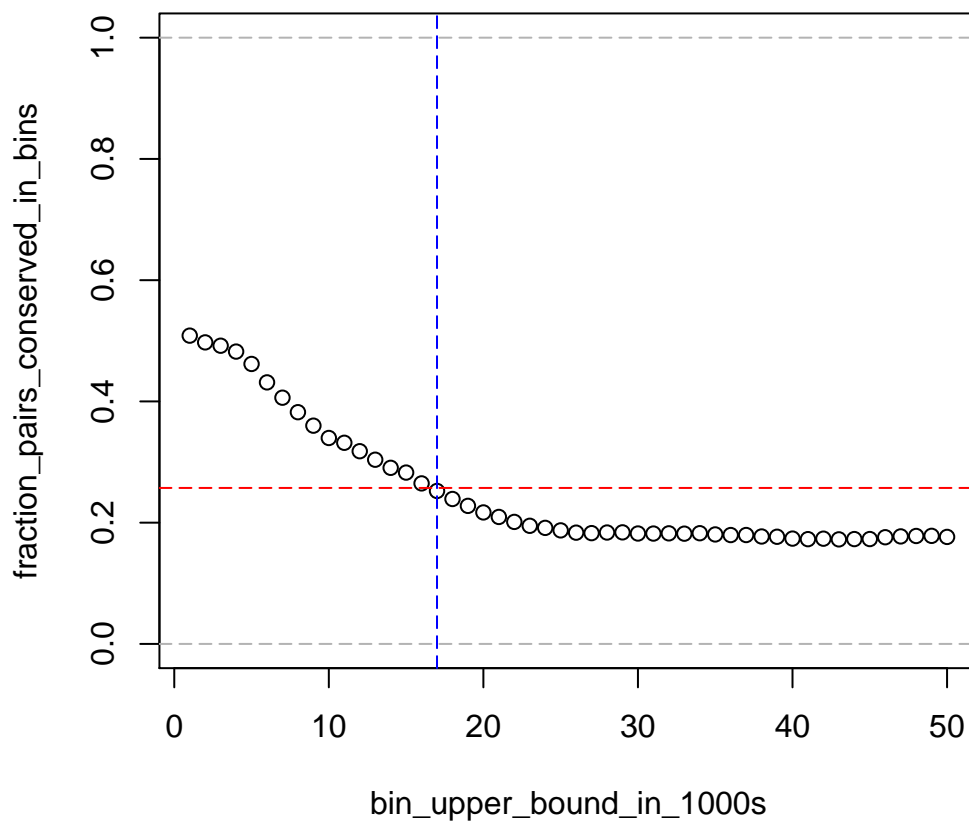

Supplement: s1 [file s1]

**Bin\_conservation\_minus\_bg\_CZ-2\_vs\_Fr5L**  
**PD-0.019939**

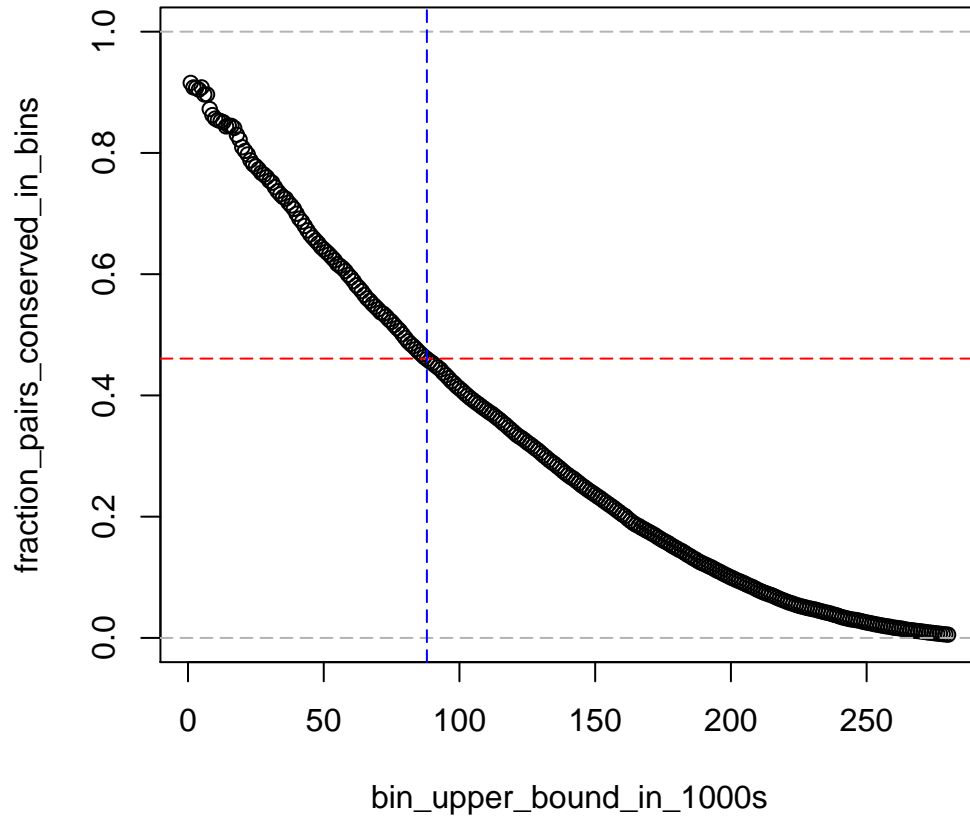

**Bin\_conservation\_minus\_bg\_CZ-2\_vs\_Fr5L**  
**PD-0.019939**

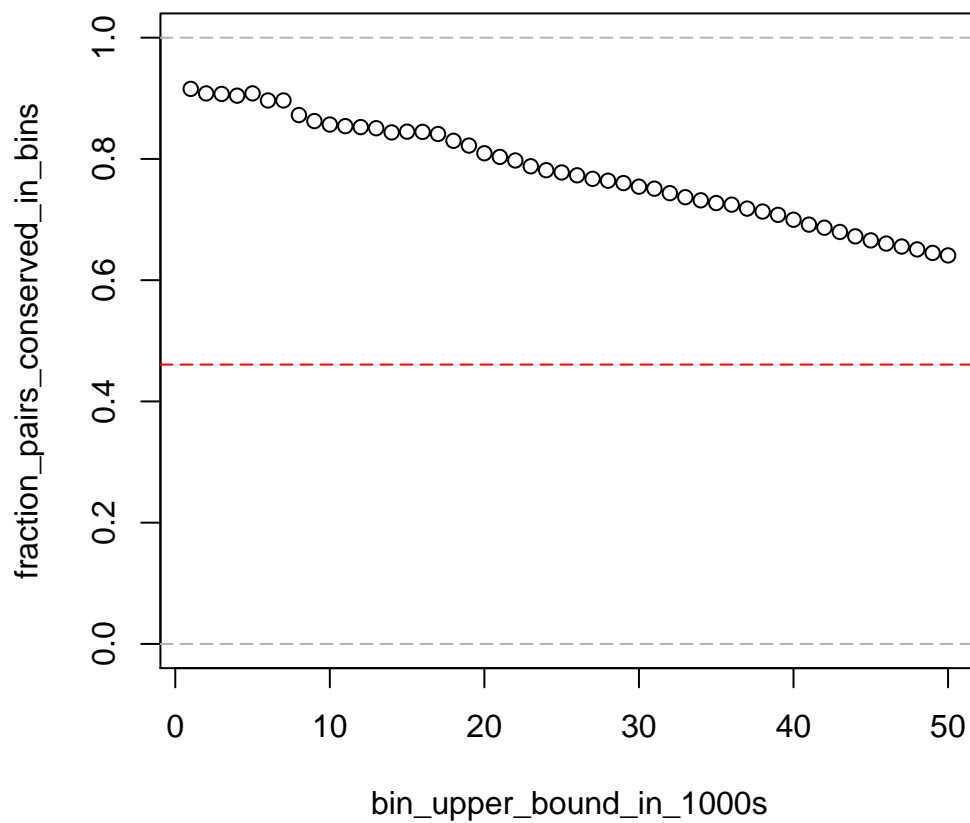

Supplement: s1 [file s1]

**Bin\_conservation\_minus\_bg\_Can18-4\_vs\_CviKI**  
**PD-0.661246**

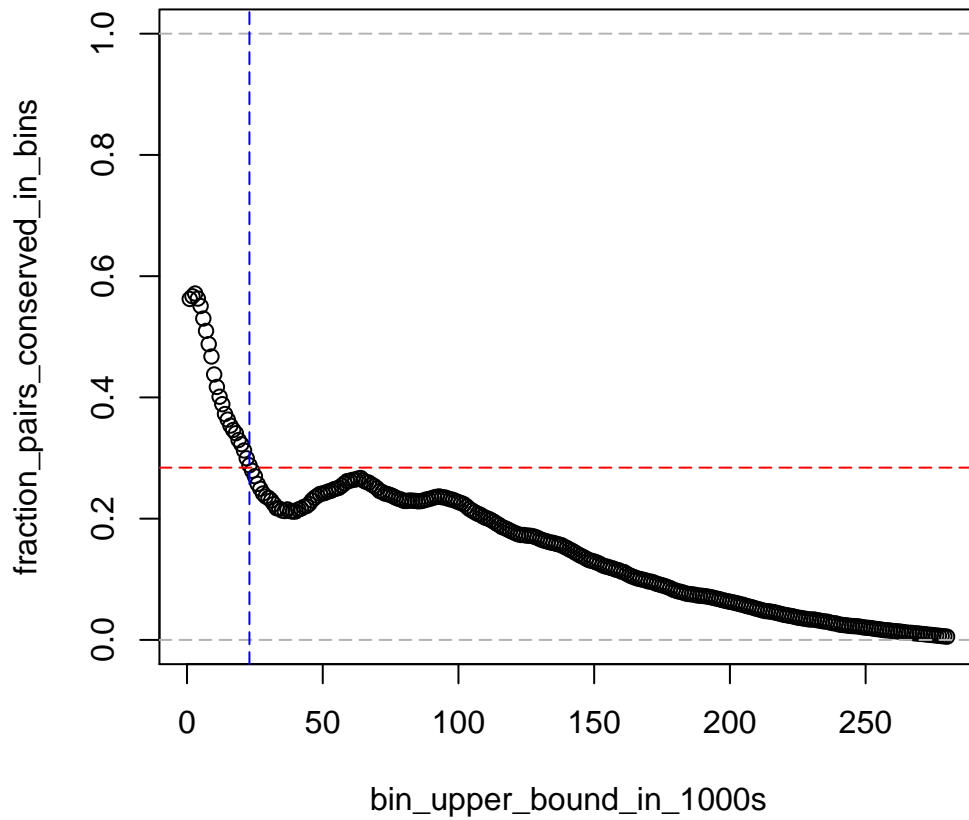

**Bin\_conservation\_minus\_bg\_Can18-4\_vs\_CviKI**  
**PD-0.661246**

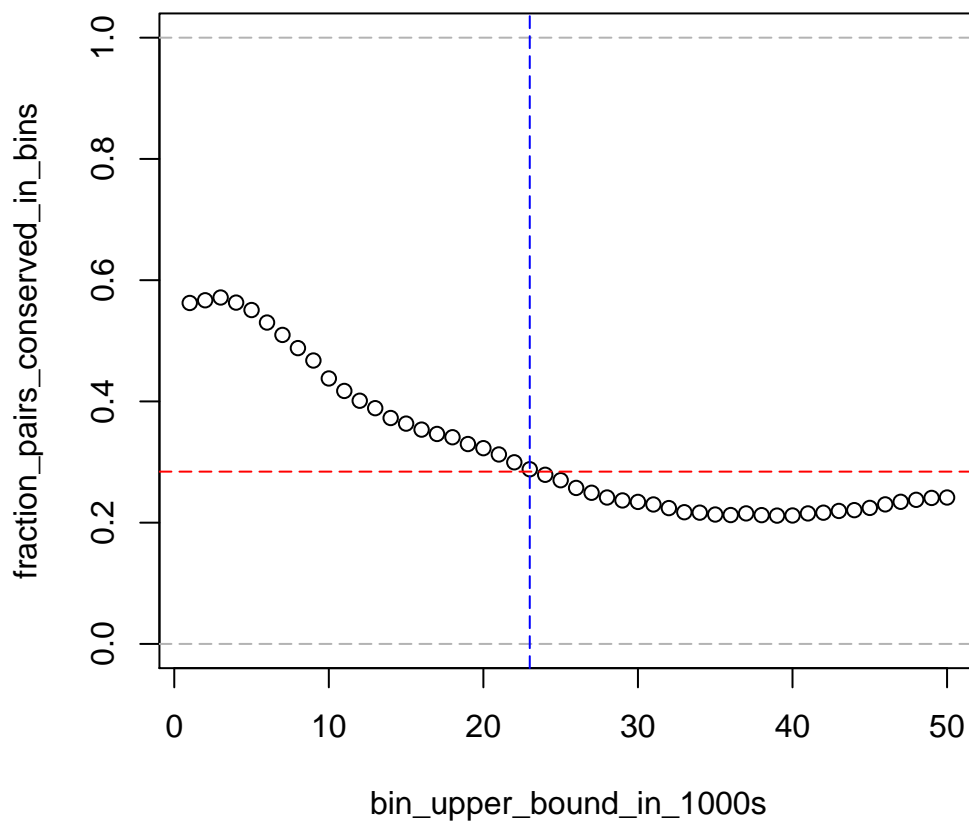

Supplement: s1 [file s1]

**Bin\_conservation\_minus\_bg\_FR483\_vs\_MT325**  
**PD-0.028029**

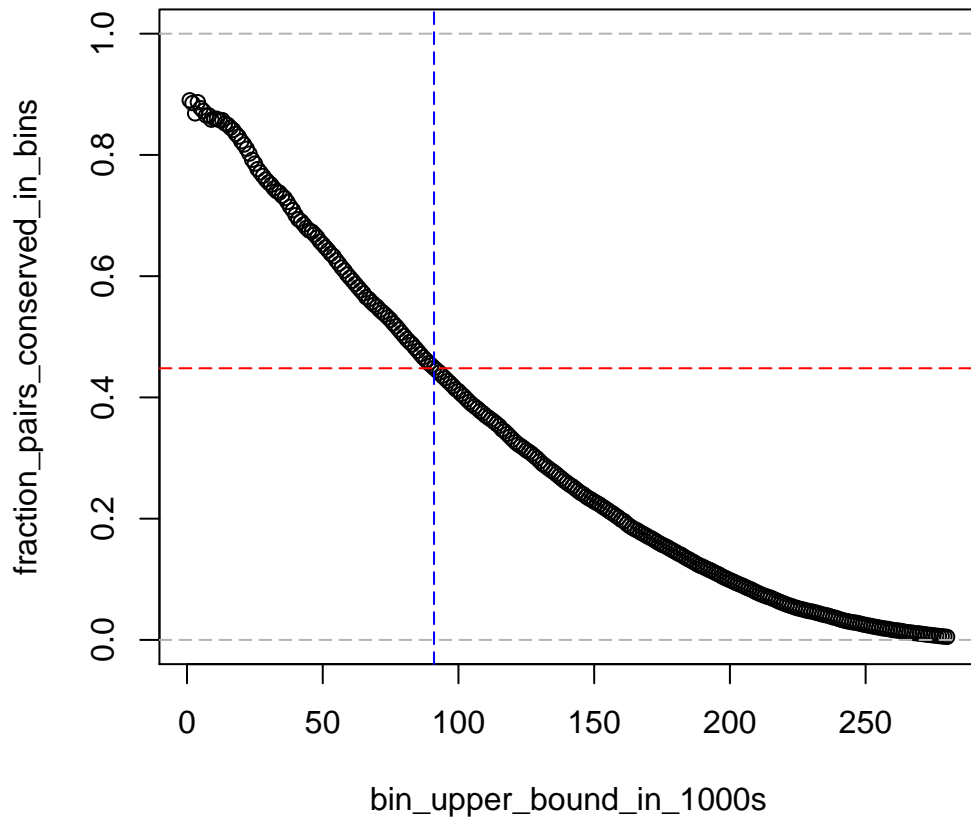

**Bin\_conservation\_minus\_bg\_FR483\_vs\_MT325**  
**PD-0.028029**

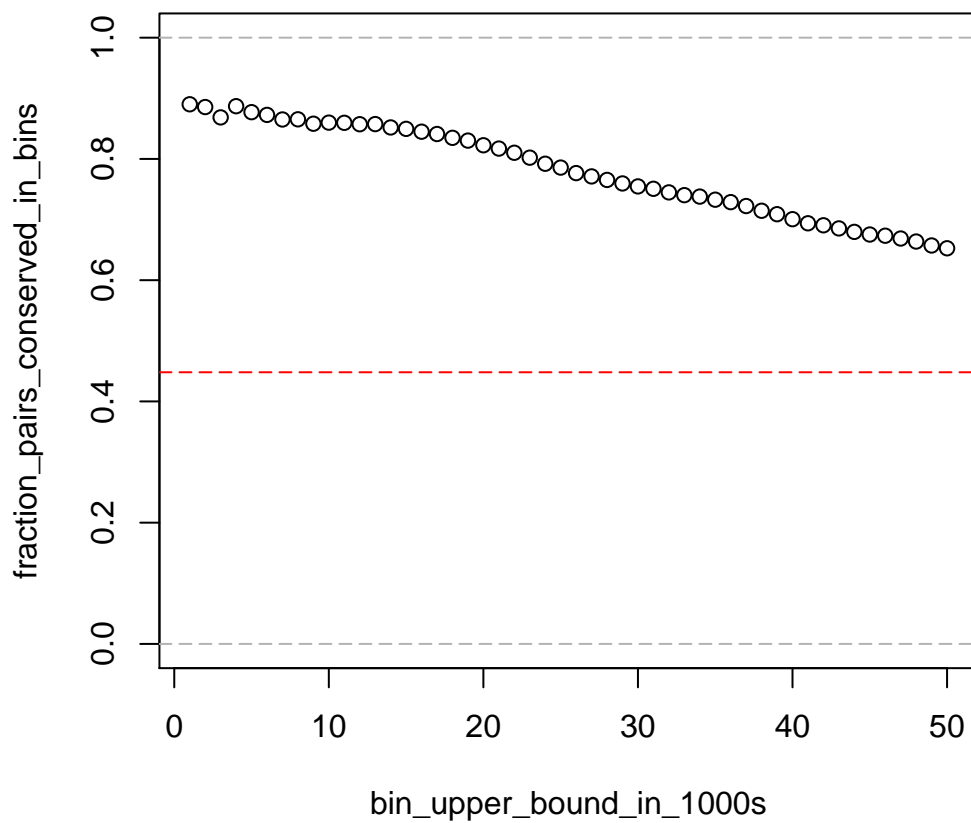

Supplement: s1 [file s1]

**Bin\_conservation\_minus\_bg\_NE-JV-4\_vs\_TN603.4.2**  
**PD-0.671316**

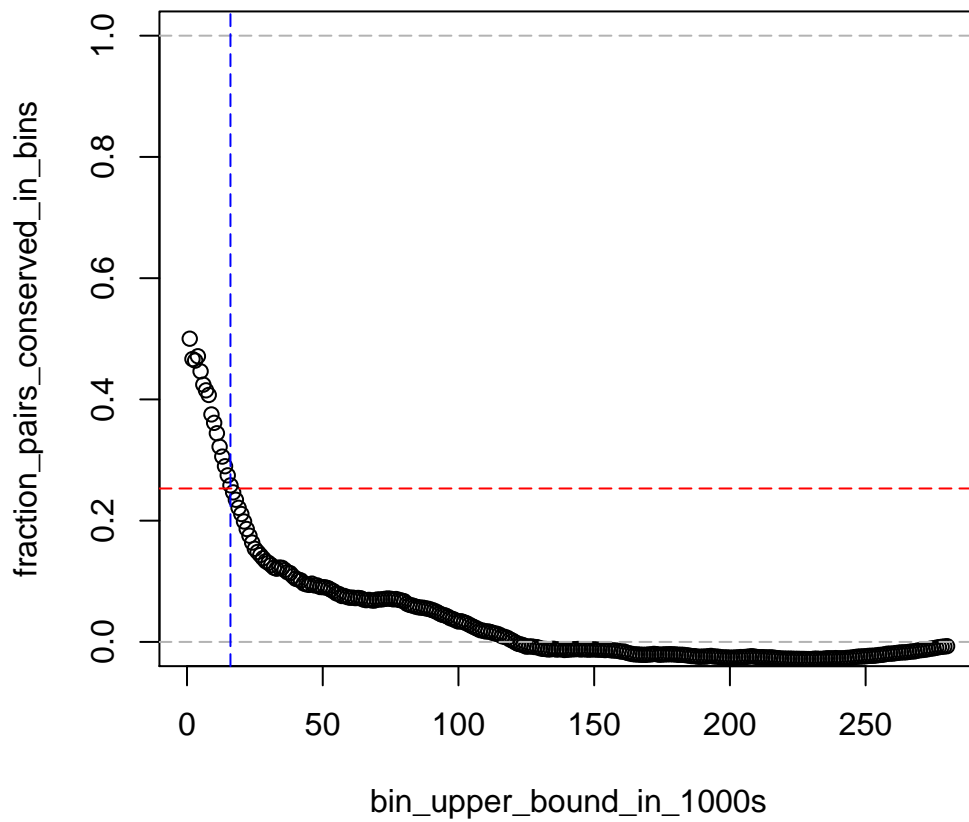

**Bin\_conservation\_minus\_bg\_NE-JV-4\_vs\_TN603.4.2**  
**PD-0.671316**

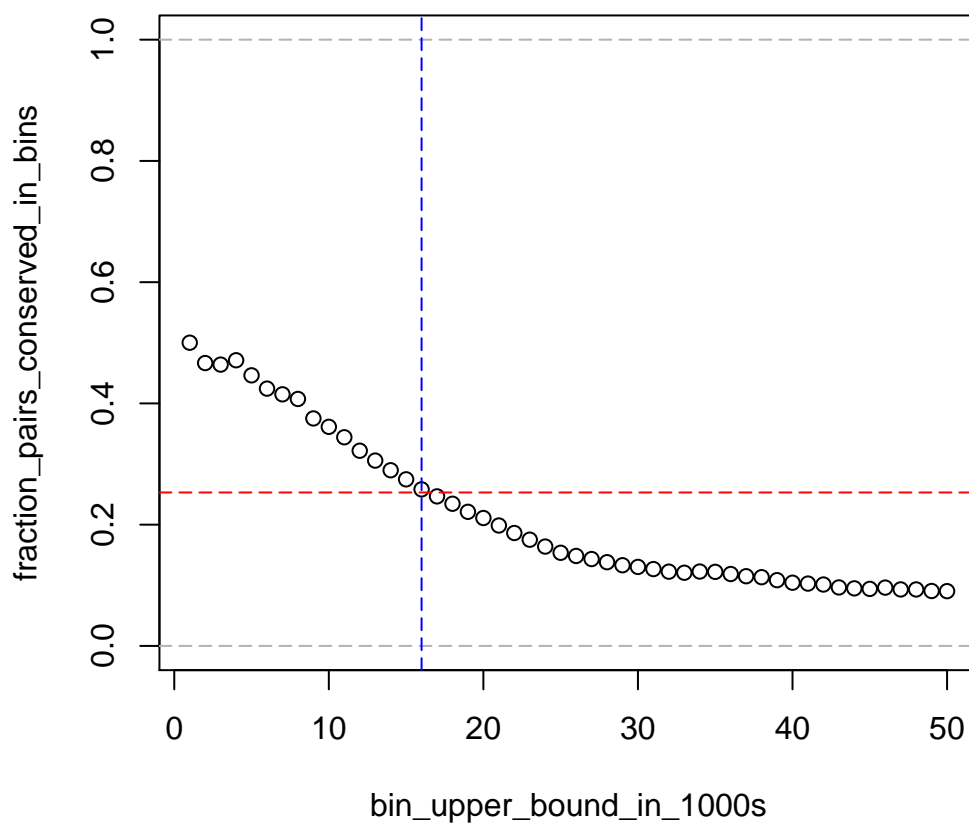

Supplement: s1 [file s1]

**Bin\_conservation\_minus\_bg\_Can18-4\_vs\_CVR-1**  
**PD-0.031296**

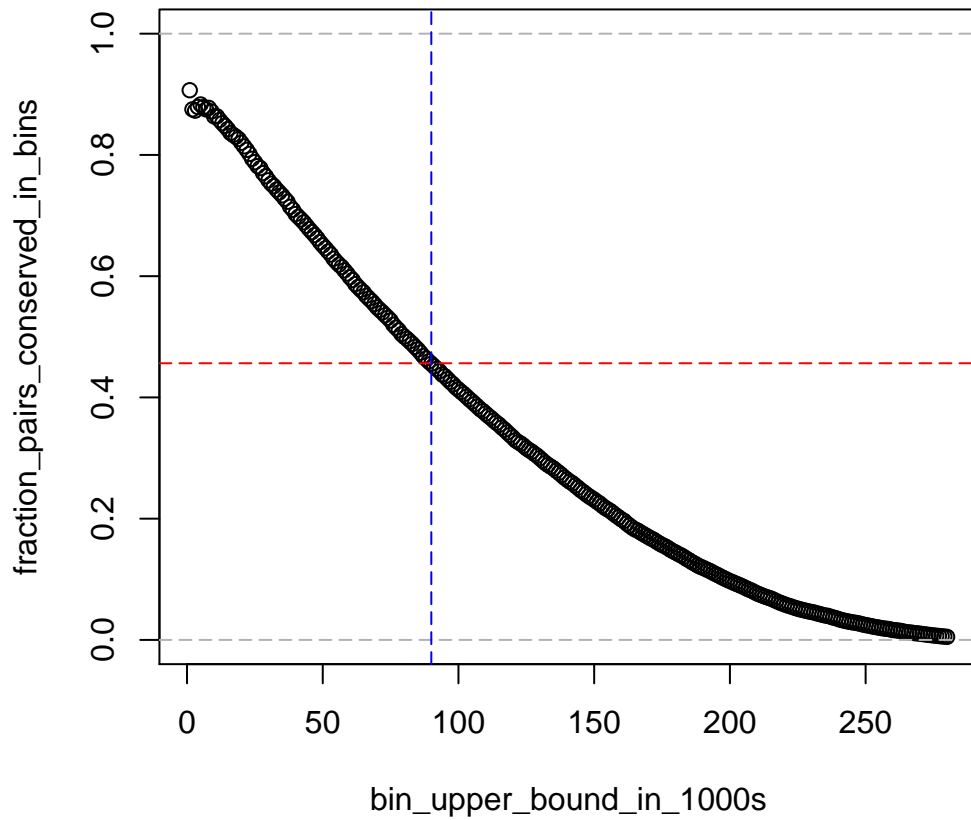

**Bin\_conservation\_minus\_bg\_Can18-4\_vs\_CVR-1**  
**PD-0.031296**

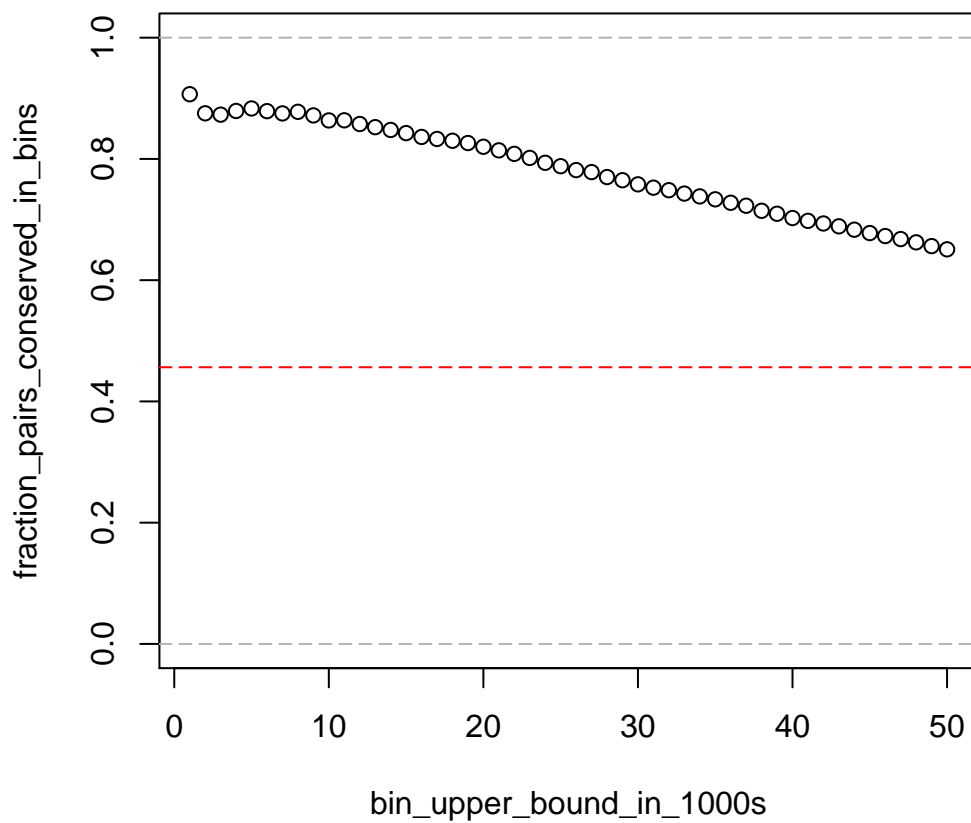

Supplement: s1 [file s1]

**Bin\_conservation\_minus\_bg\_CVG-1\_vs\_CVR-1**  
**PD-0.015089**

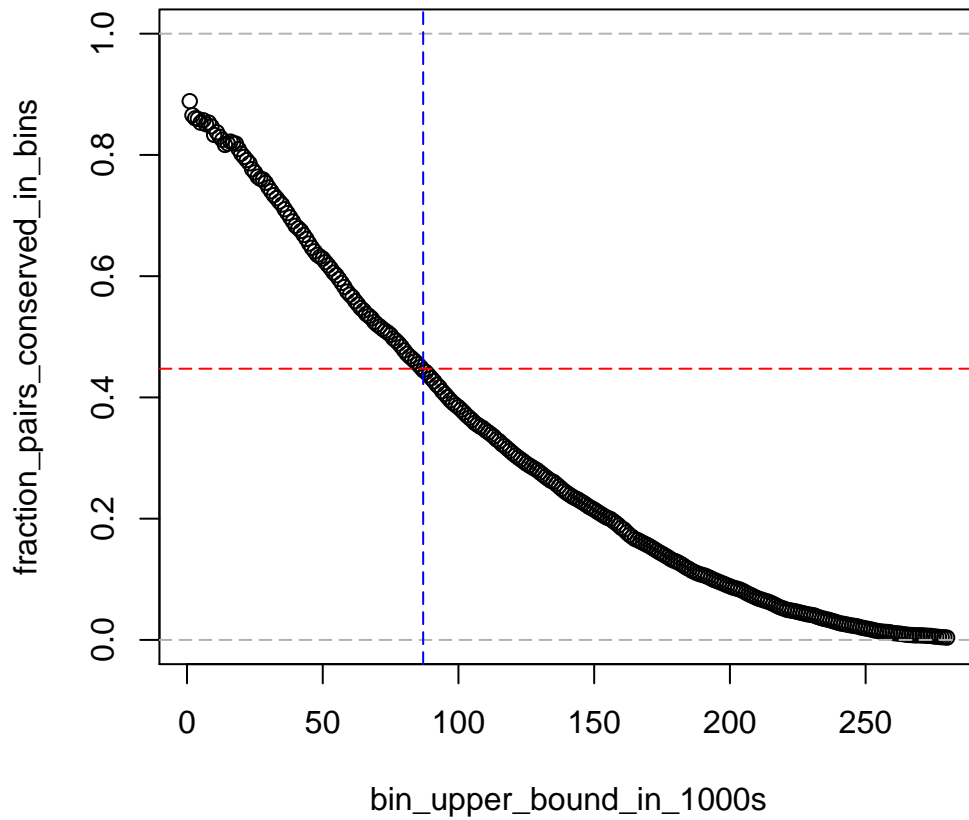

**Bin\_conservation\_minus\_bg\_CVG-1\_vs\_CVR-1**  
**PD-0.015089**

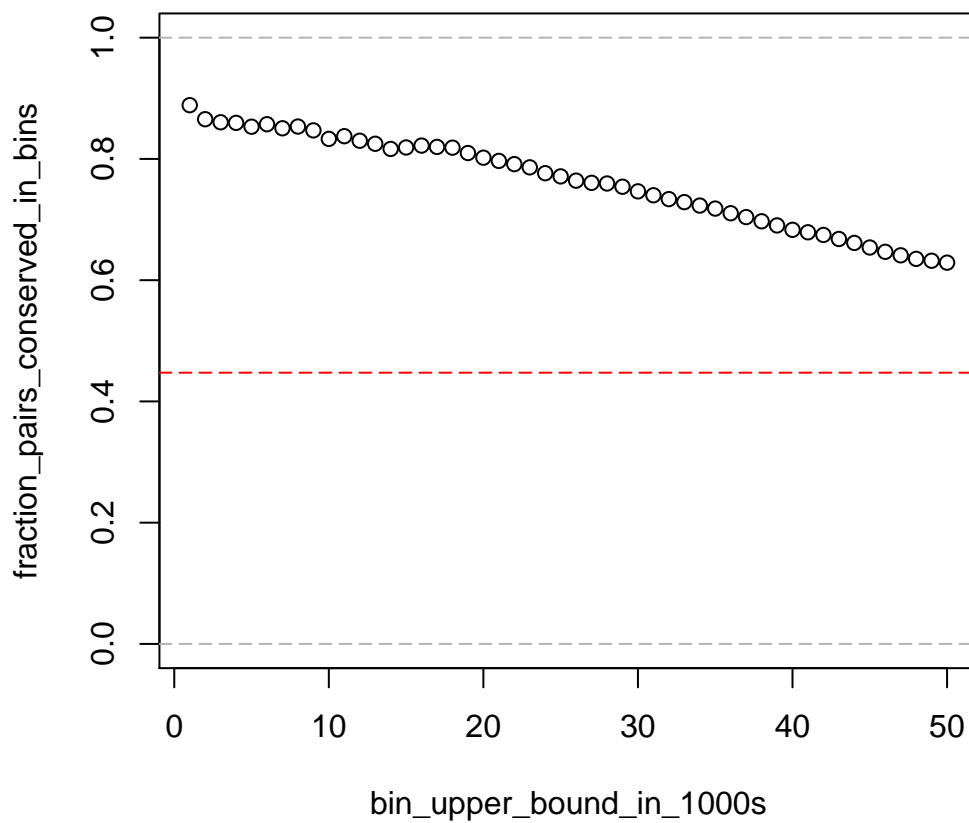

Supplement: s1 [file s1]

**Bin\_conservation\_minus\_bg\_AP110A\_vs\_CvsA1**  
**PD-0.65509**

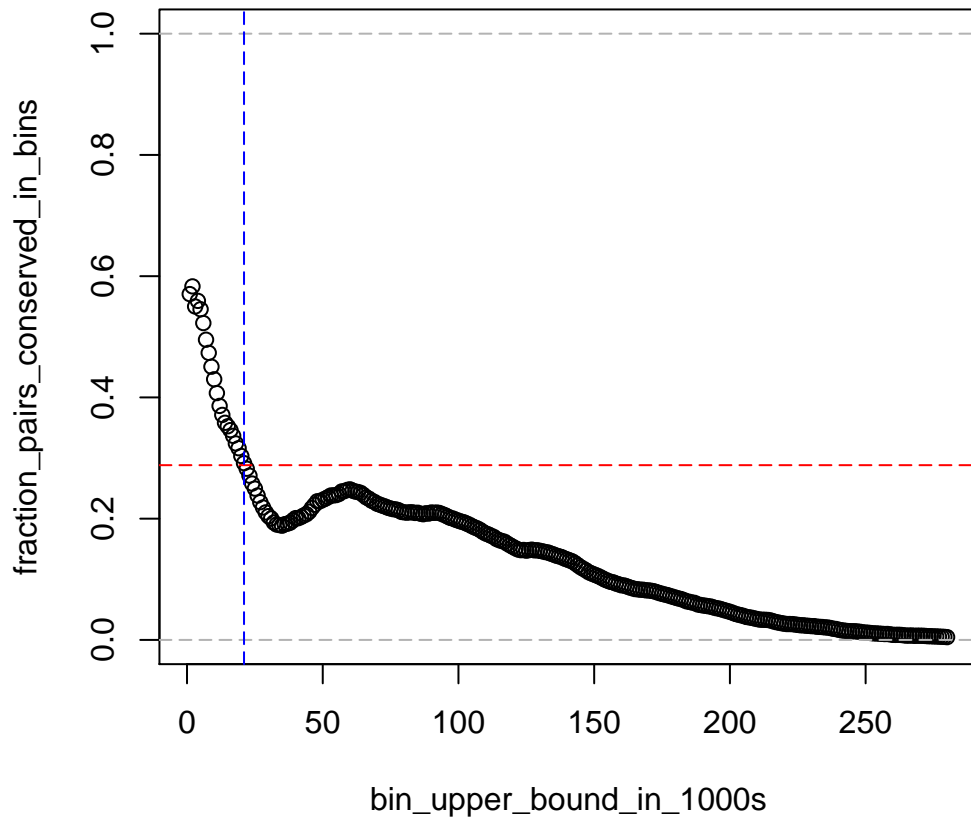

**Bin\_conservation\_minus\_bg\_AP110A\_vs\_CvsA1**  
**PD-0.65509**

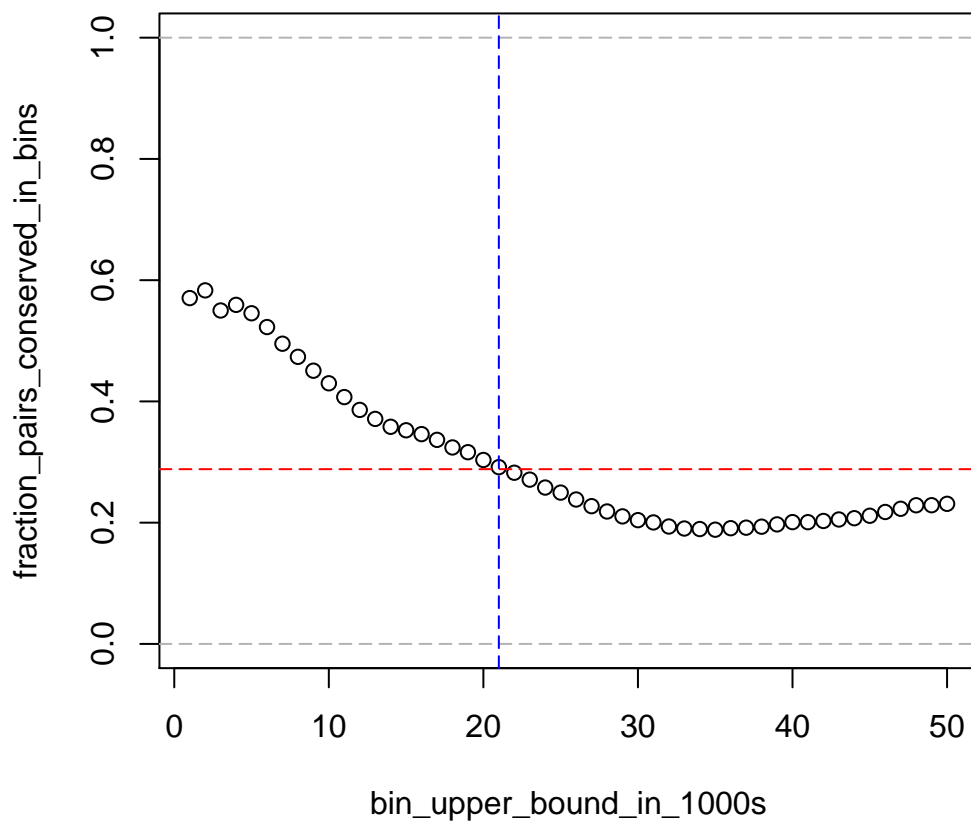

Supplement: s1 [file s1]

**Bin\_conservation\_minus\_bg\_NW665.2\_vs\_NY2A**  
**PD-0.671043**

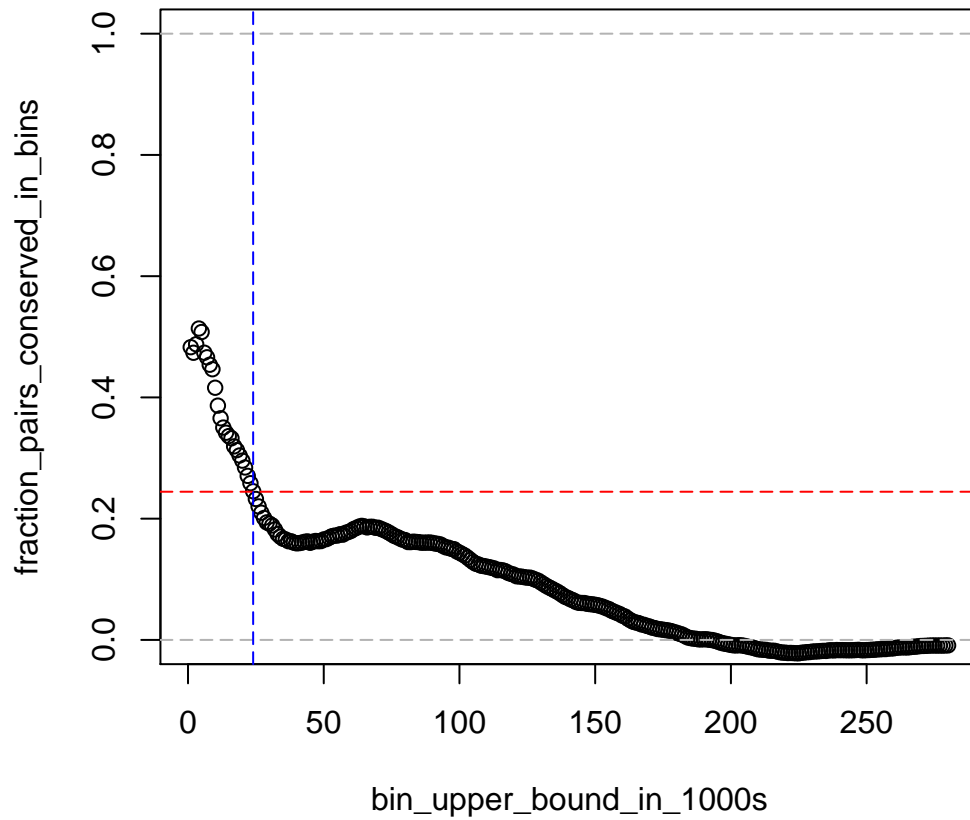

**Bin\_conservation\_minus\_bg\_NW665.2\_vs\_NY2A**  
**PD-0.671043**

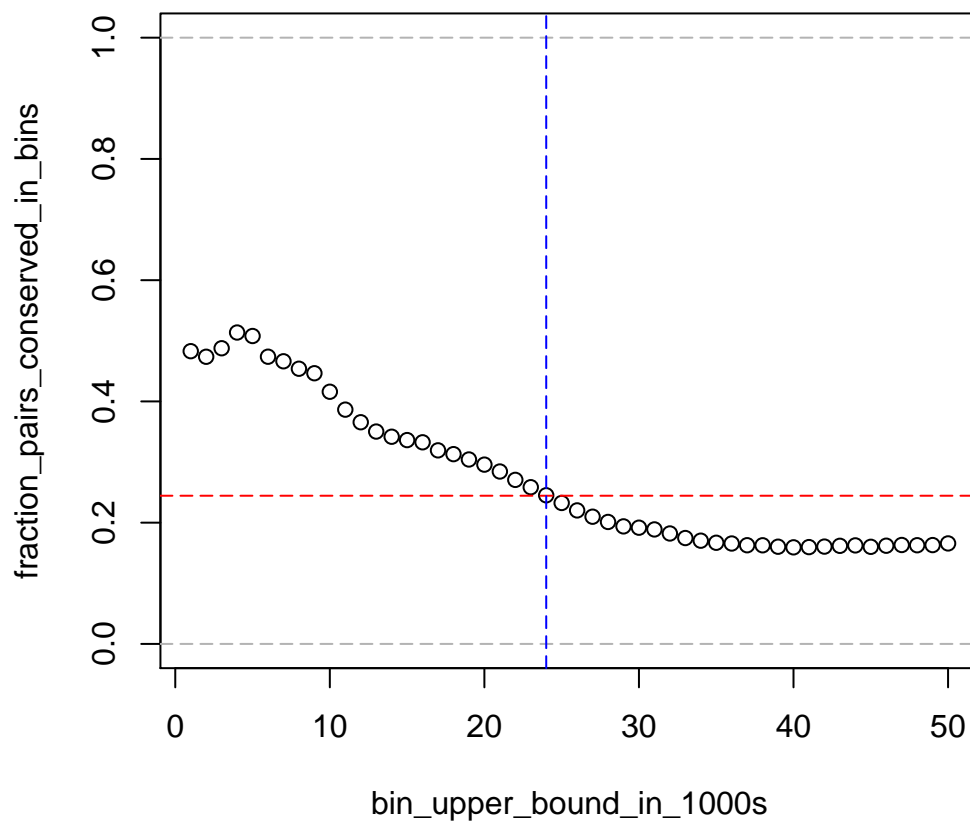

Supplement: s1 [file s1]

**Bin\_conservation\_minus\_bg\_IL-3A\_vs\_NE-JV-2**  
**PD-0.681127**

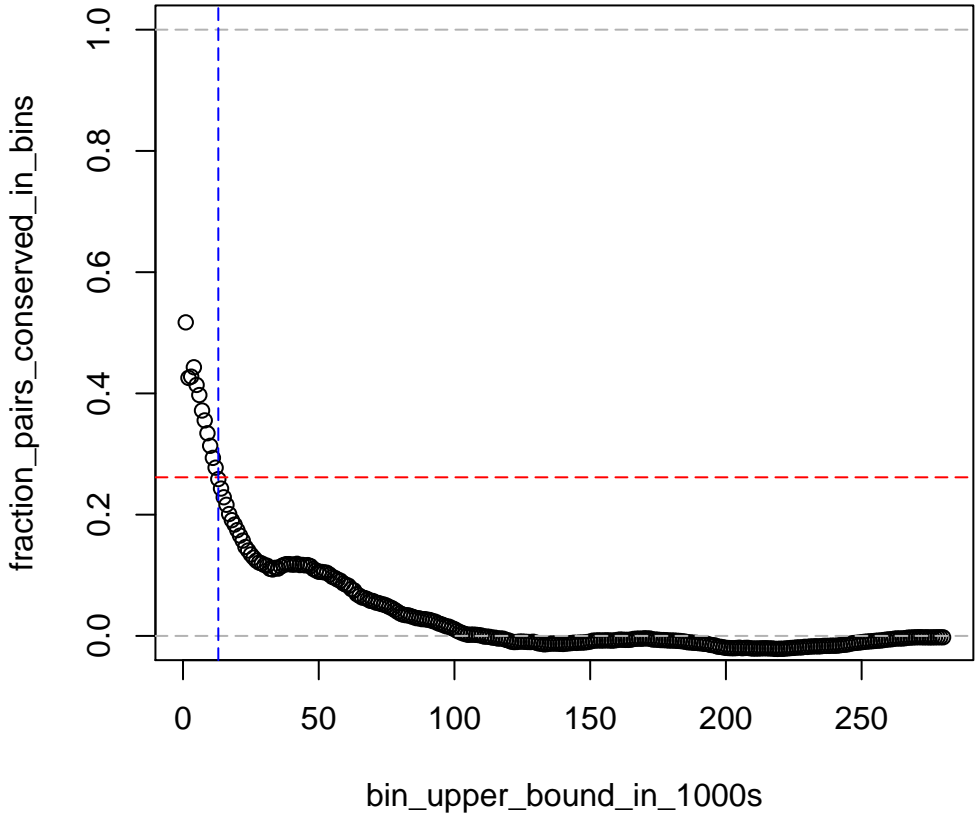

**Bin\_conservation\_minus\_bg\_IL-3A\_vs\_NE-JV-2**  
**PD-0.681127**

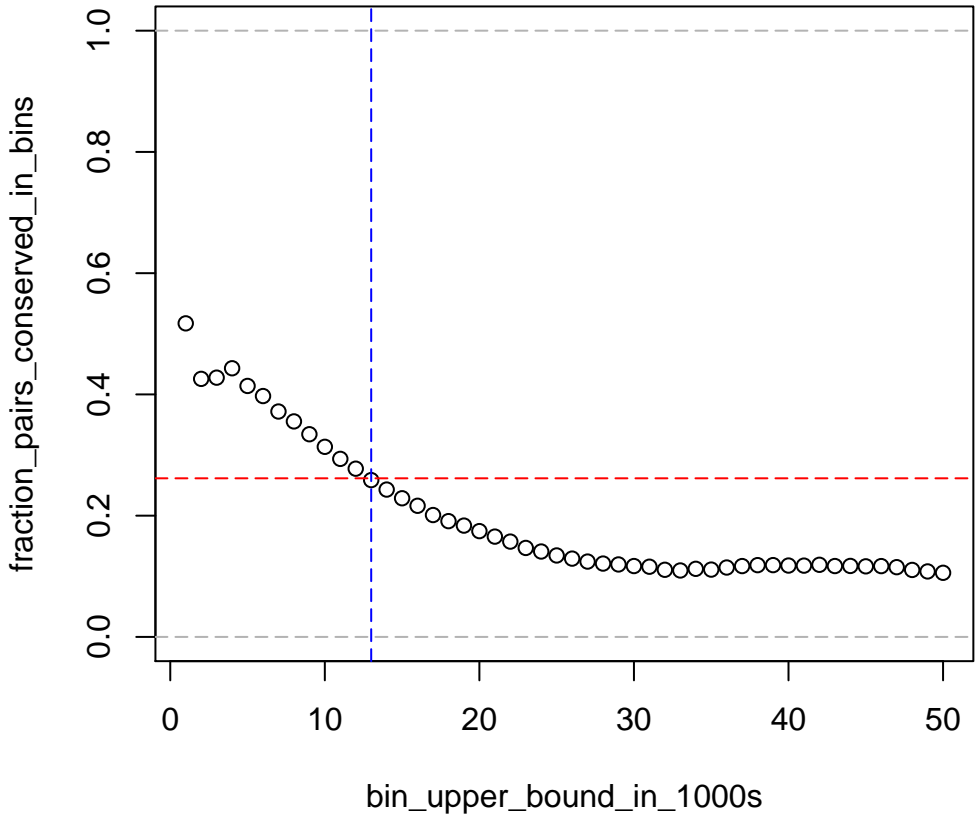

Supplement: s1 [file s1]

**Bin\_conservation\_minus\_bg\_Br0604L\_vs\_Canal-1**  
**PD-0.103116**

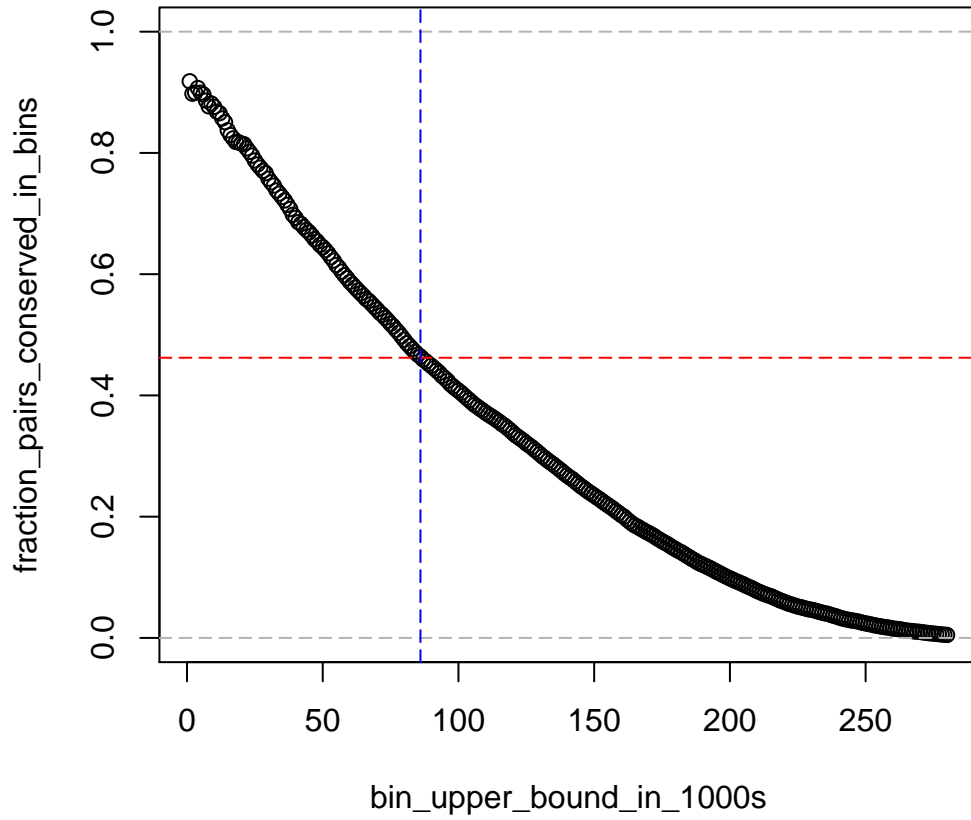

**Bin\_conservation\_minus\_bg\_Br0604L\_vs\_Canal-1**  
**PD-0.103116**

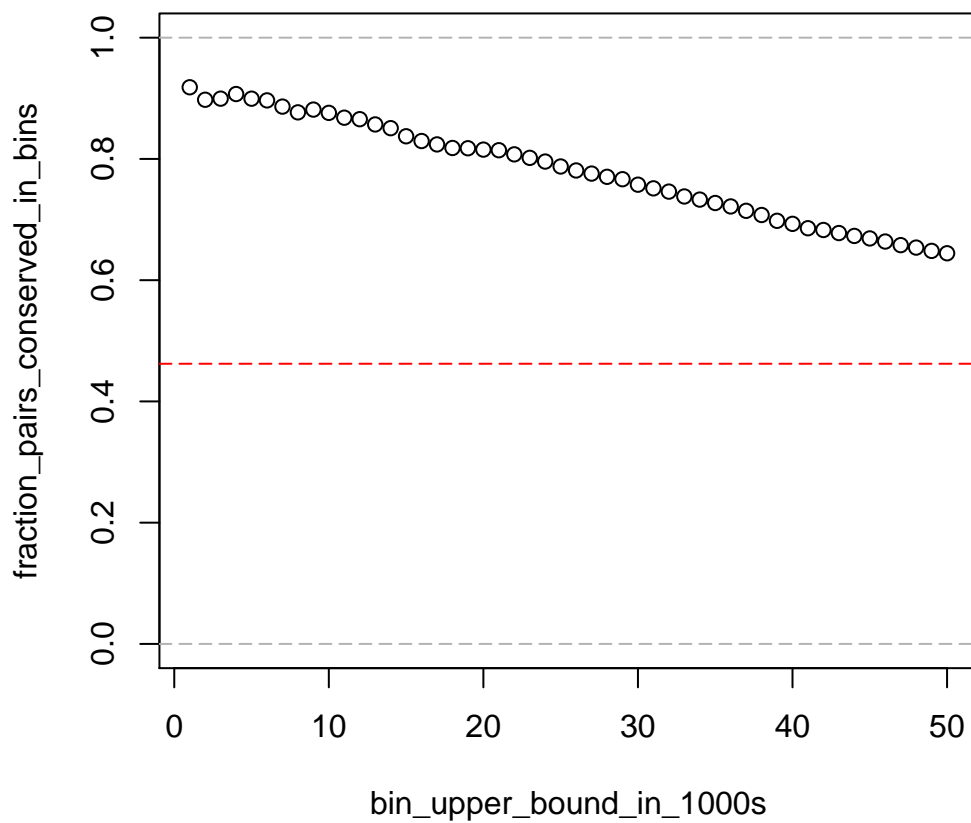

Supplement: s1 [file s1]

**Bin\_conservation\_minus\_bg\_MT325\_vs\_NW665.2**  
**PD-0.026172**

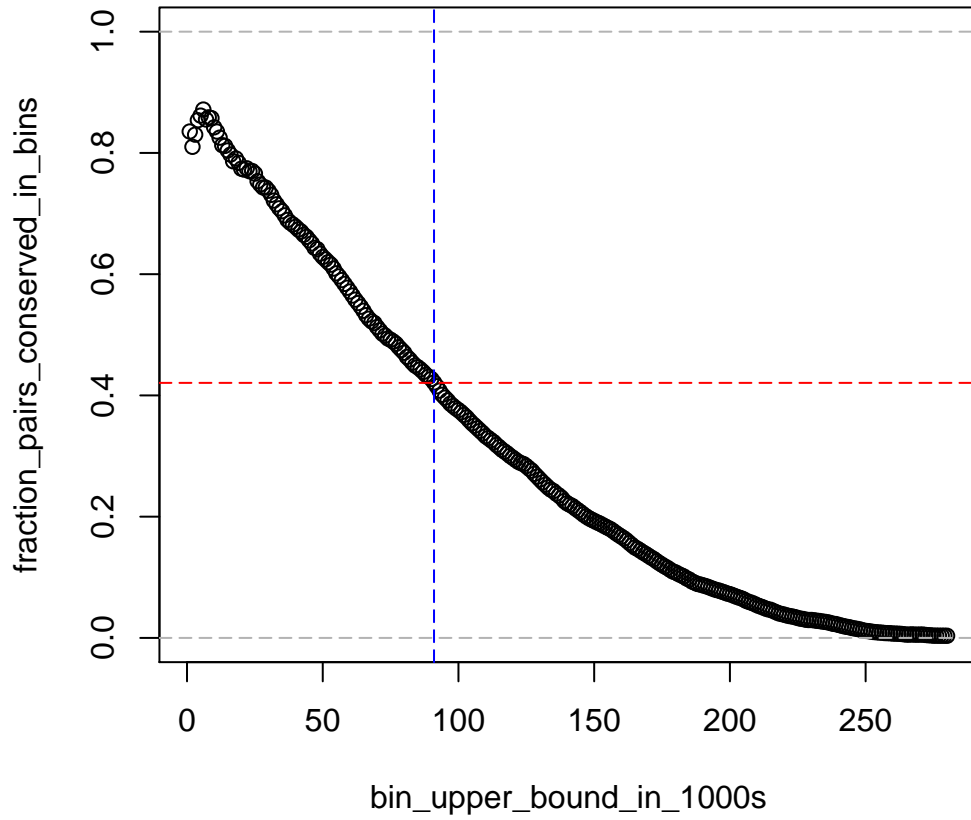

**Bin\_conservation\_minus\_bg\_MT325\_vs\_NW665.2**  
**PD-0.026172**

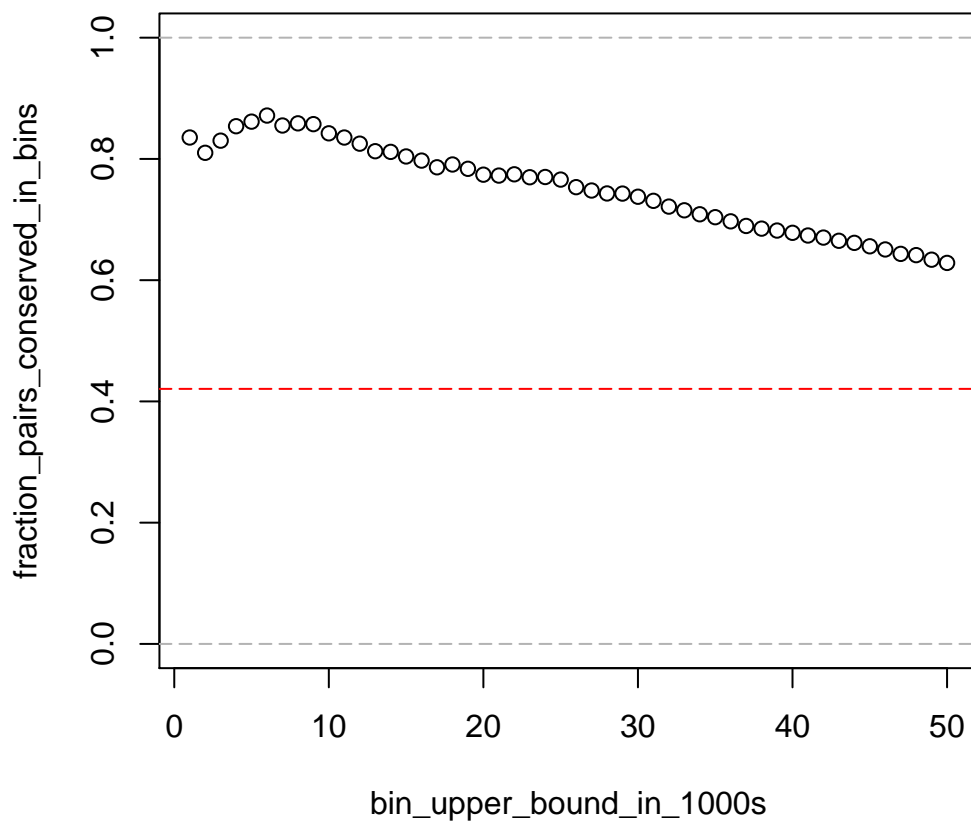

Supplement: s1 [file s1]

**Bin\_conservation\_minus\_bg\_CVM-1\_vs\_MA-1D**  
**PD-0.658129**

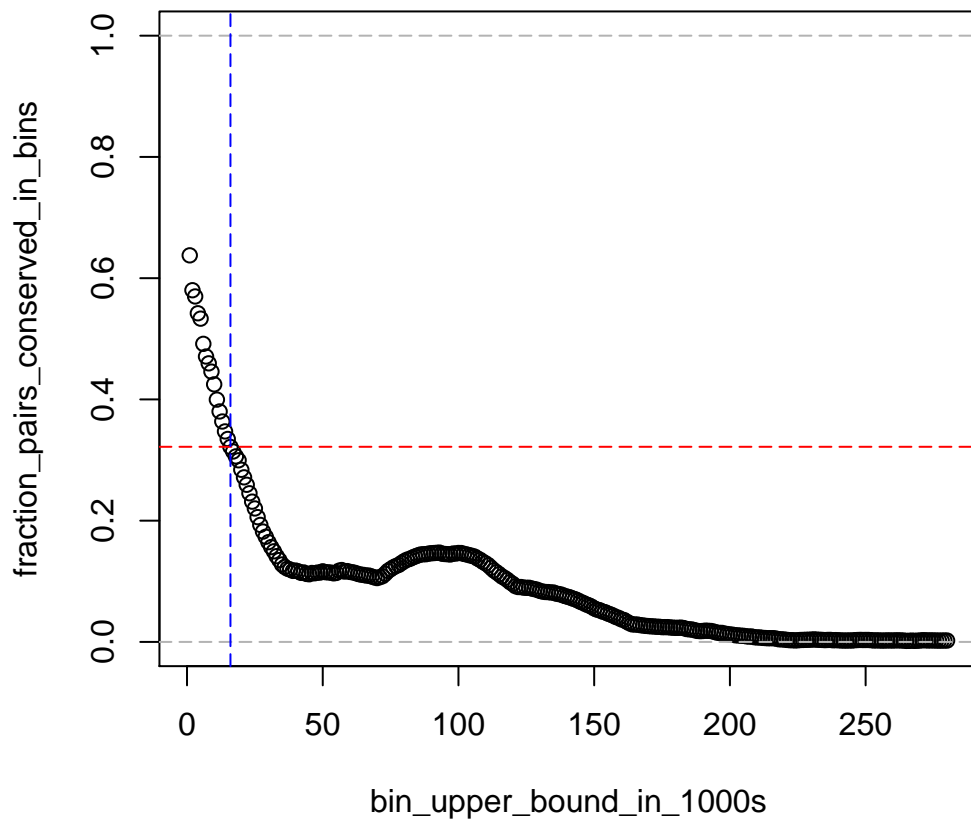

**Bin\_conservation\_minus\_bg\_CVM-1\_vs\_MA-1D**  
**PD-0.658129**

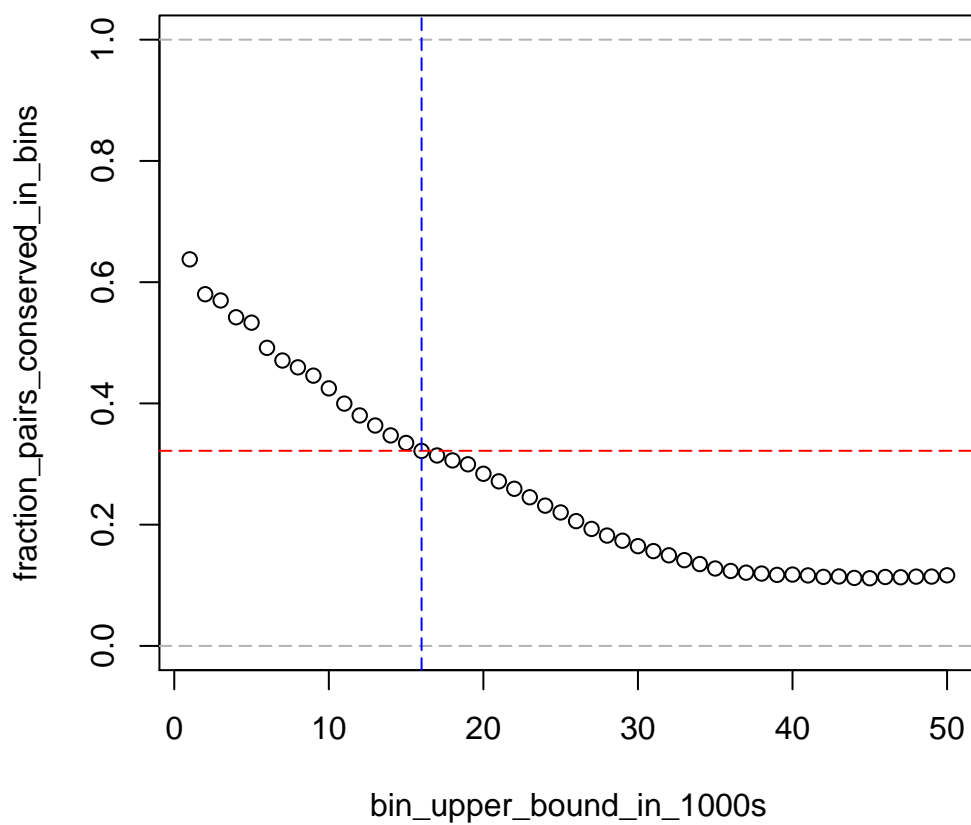

Supplement: s1 [file s1]

**Bin\_conservation\_minus\_bg\_NW665.2\_vs\_PBCV1**  
**PD-0.637891**

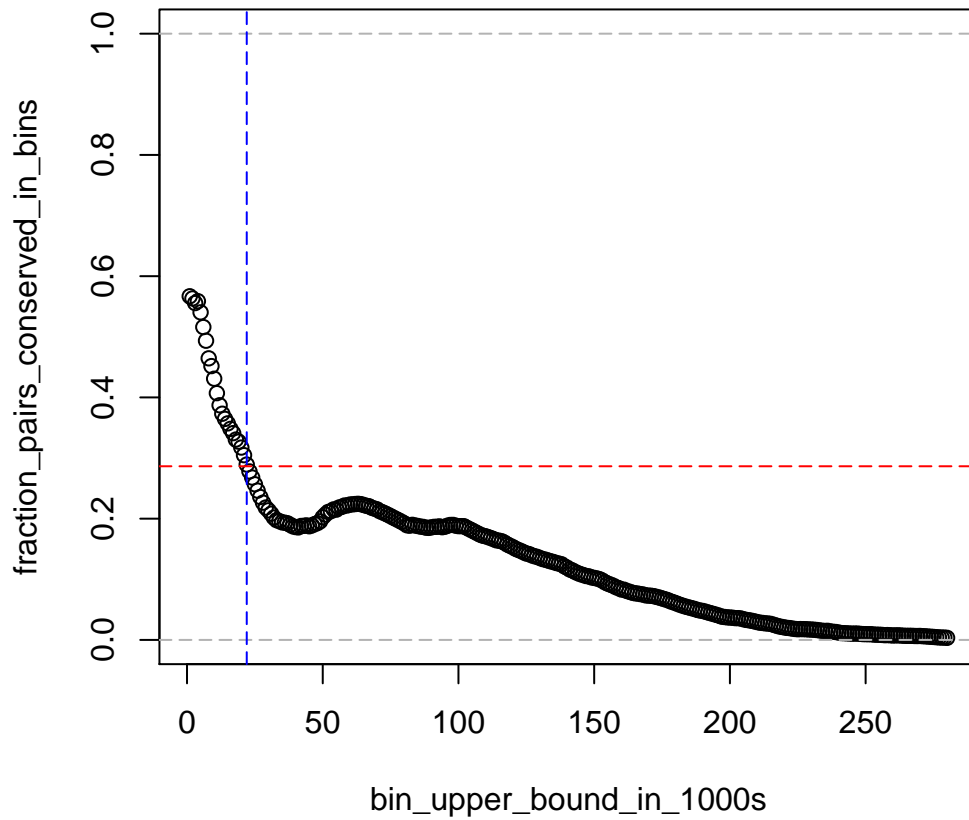

**Bin\_conservation\_minus\_bg\_NW665.2\_vs\_PBCV1**  
**PD-0.637891**

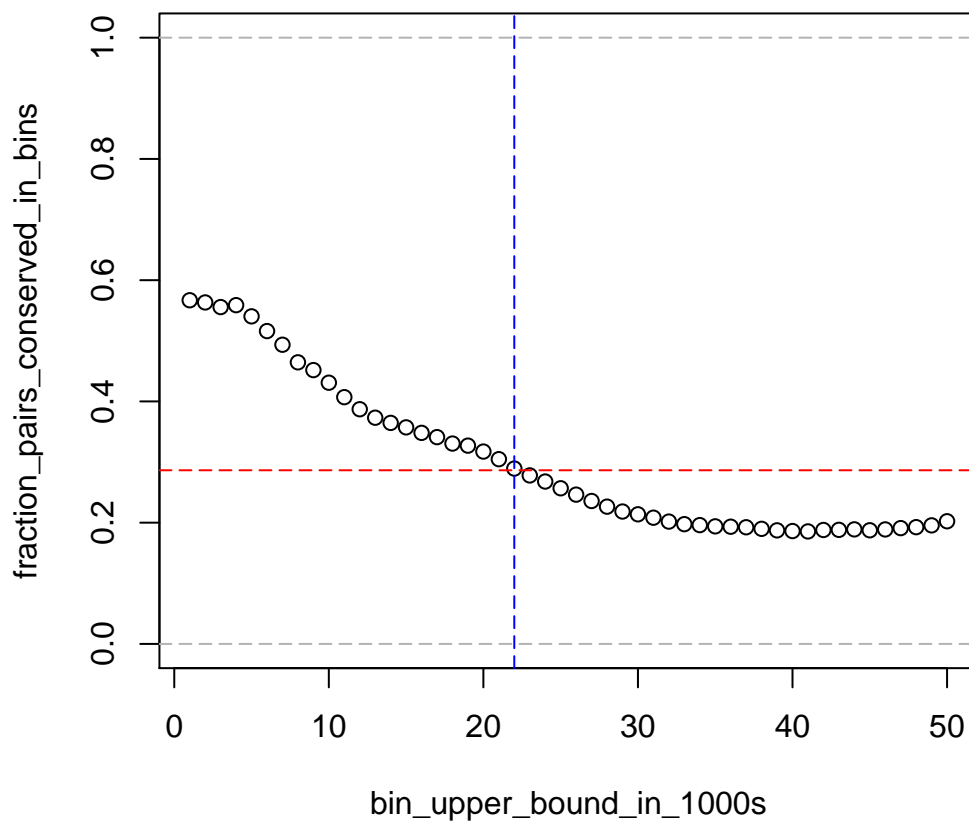

Supplement: s1 [file s1]

**Bin\_conservation\_minus\_bg\_Canal-1\_vs\_NE-JV-2**  
**PD-0.113787**

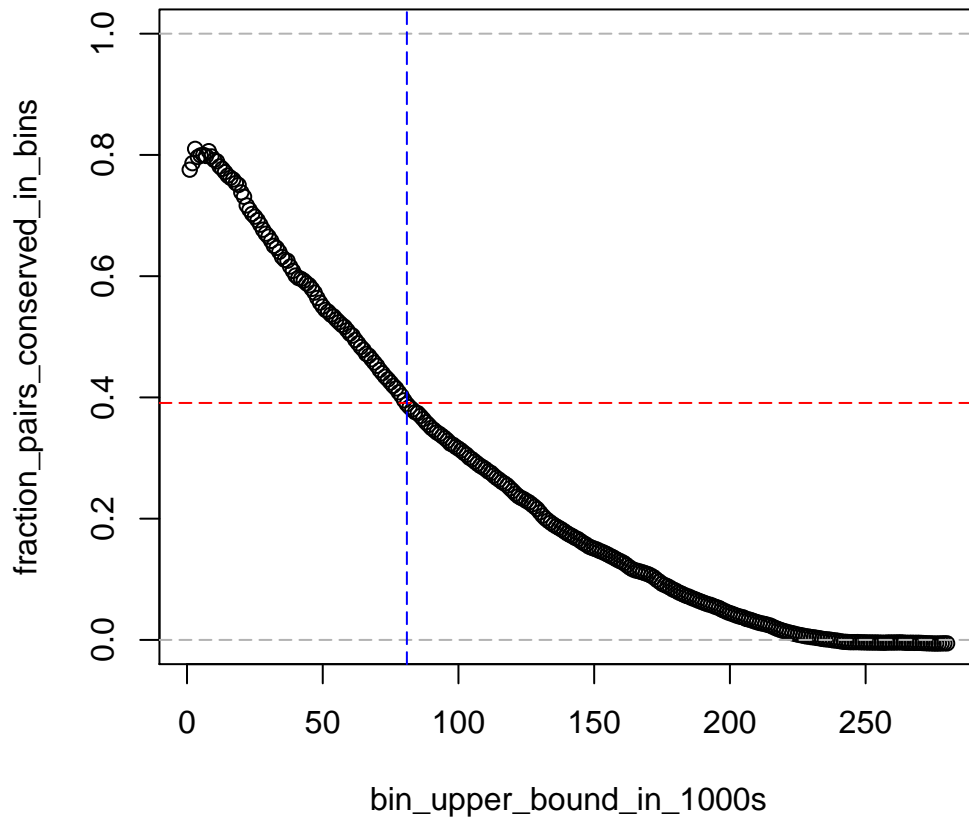

**Bin\_conservation\_minus\_bg\_Canal-1\_vs\_NE-JV-2**  
**PD-0.113787**

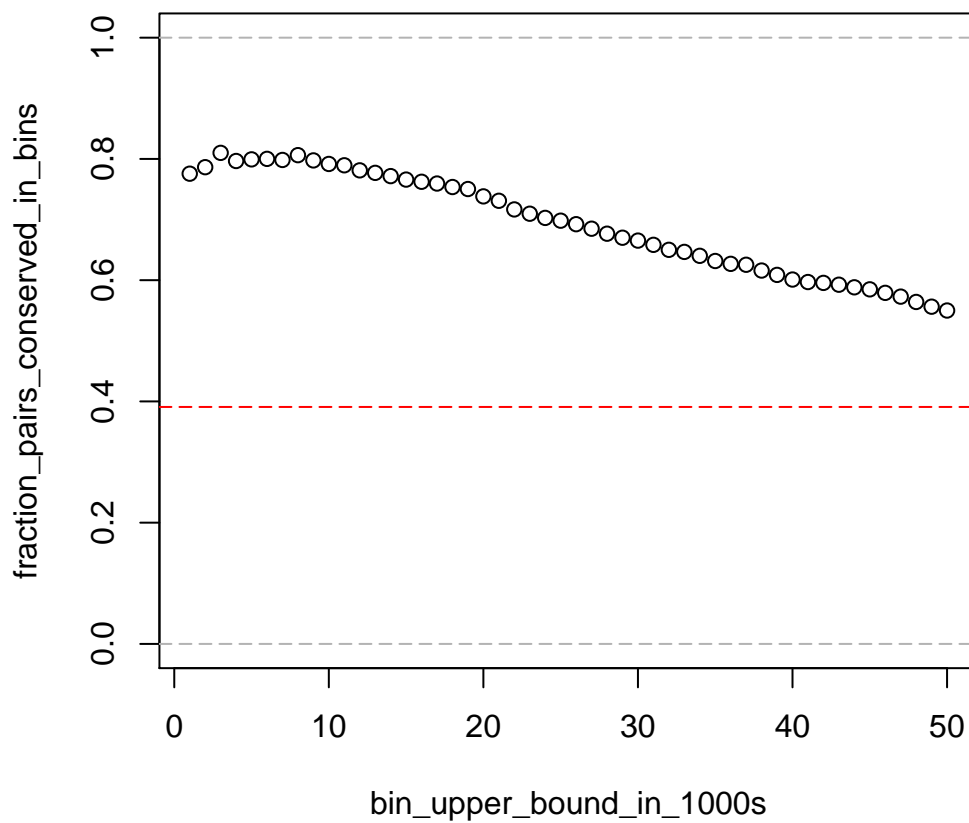

Supplement: s1 [file s1]

**Bin\_conservation\_minus\_bg\_IL-3A\_vs\_NY2A**  
**PD-0.141775**

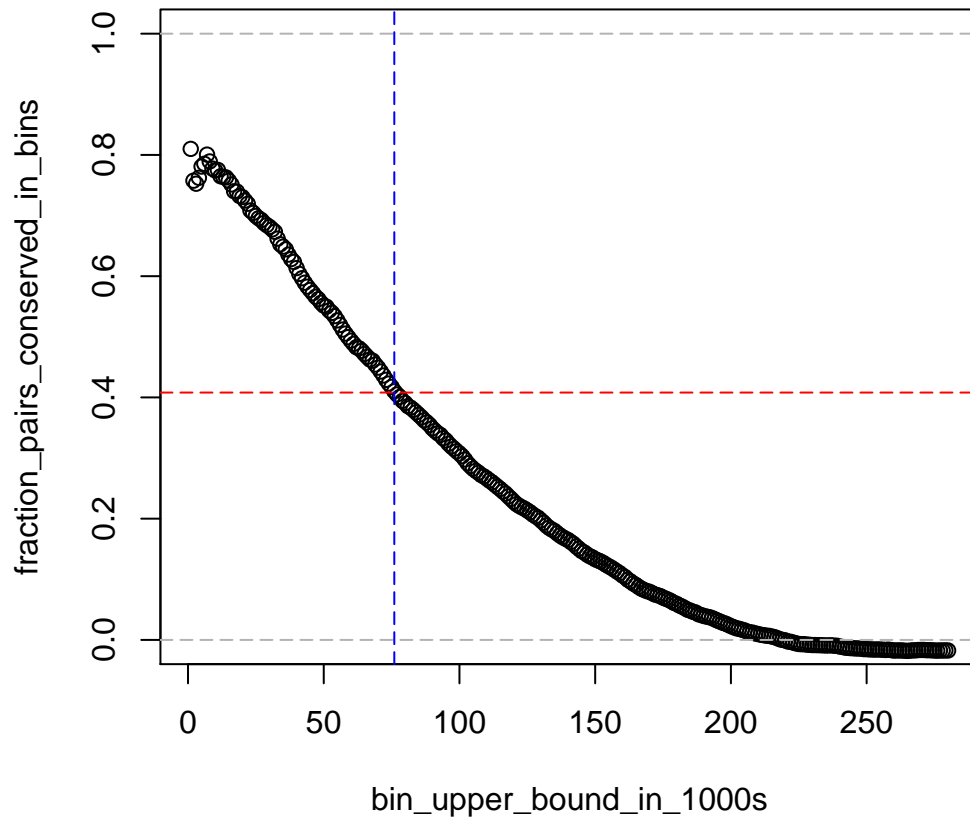

**Bin\_conservation\_minus\_bg\_IL-3A\_vs\_NY2A**  
**PD-0.141775**

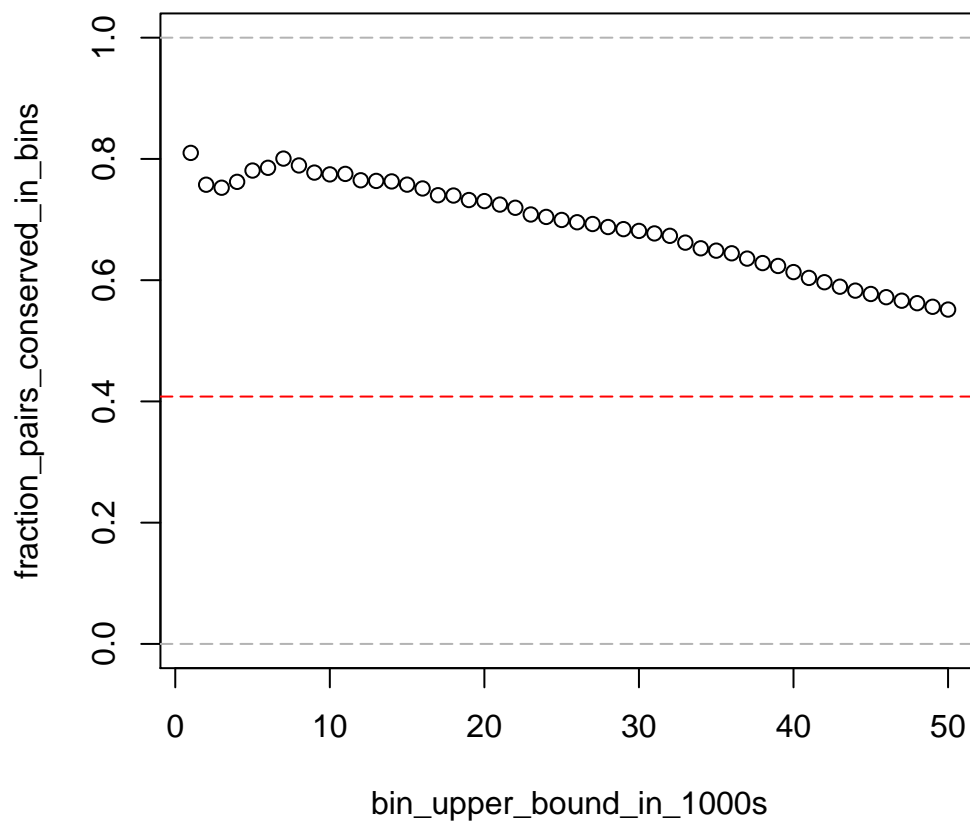

Supplement: s1 [file s1]

**Bin\_conservation\_minus\_bg\_NY-2B\_vs\_OR0704.3**  
**PD-0.705613**

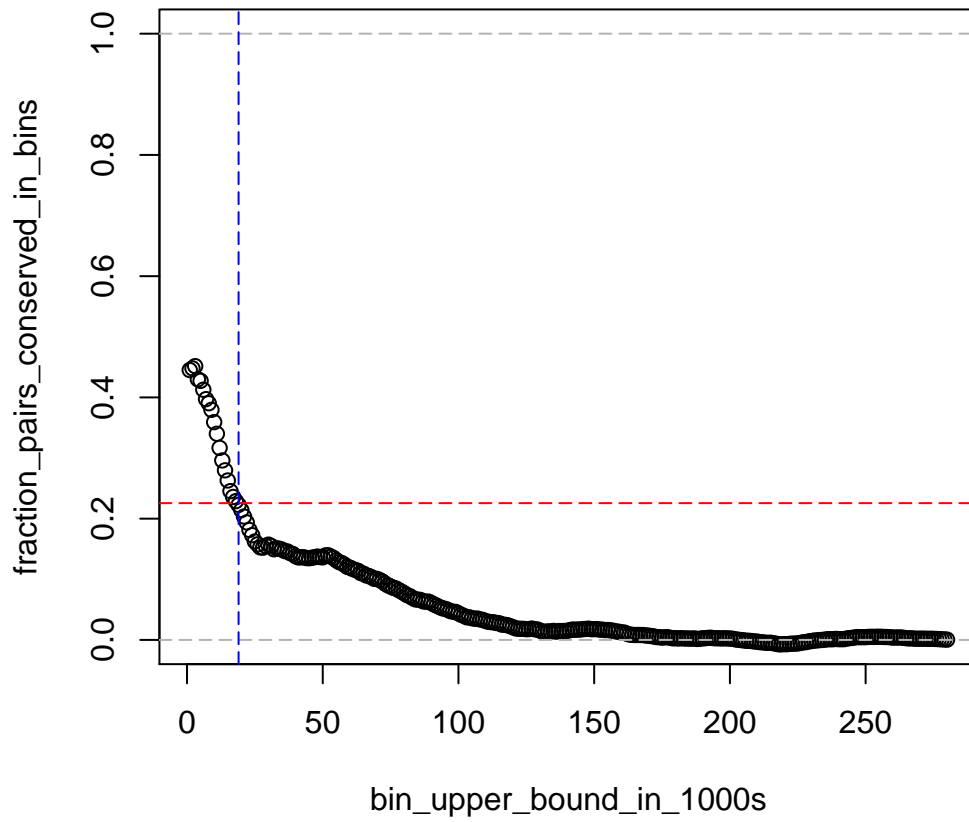

**Bin\_conservation\_minus\_bg\_NY-2B\_vs\_OR0704.3**  
**PD-0.705613**

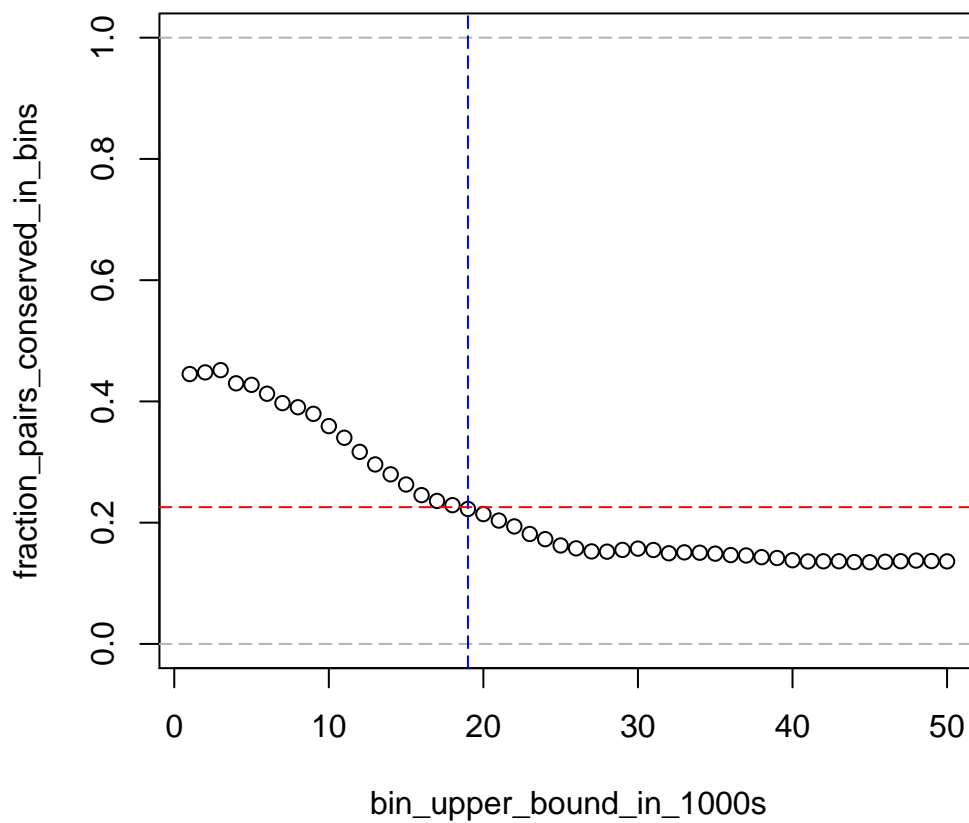

Supplement: s1 [file s1]

**Bin\_conservation\_minus\_bg\_Can0610SP\_vs\_NW665.2**  
**PD-0.463472**

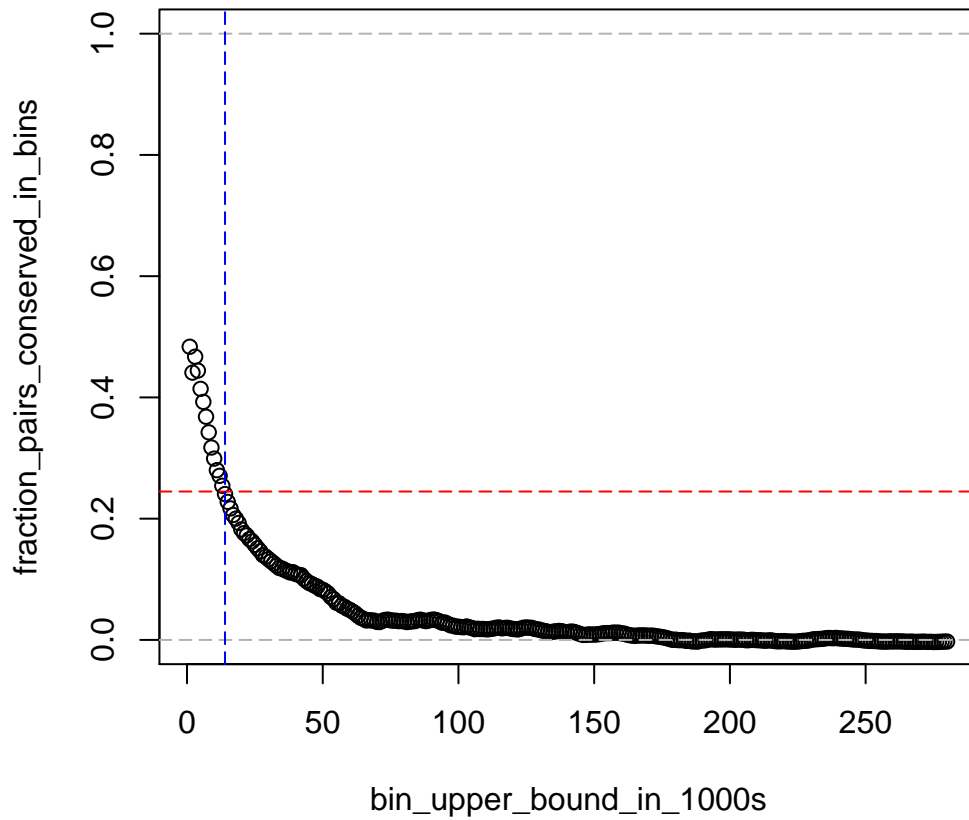

**Bin\_conservation\_minus\_bg\_Can0610SP\_vs\_NW665.2**  
**PD-0.463472**

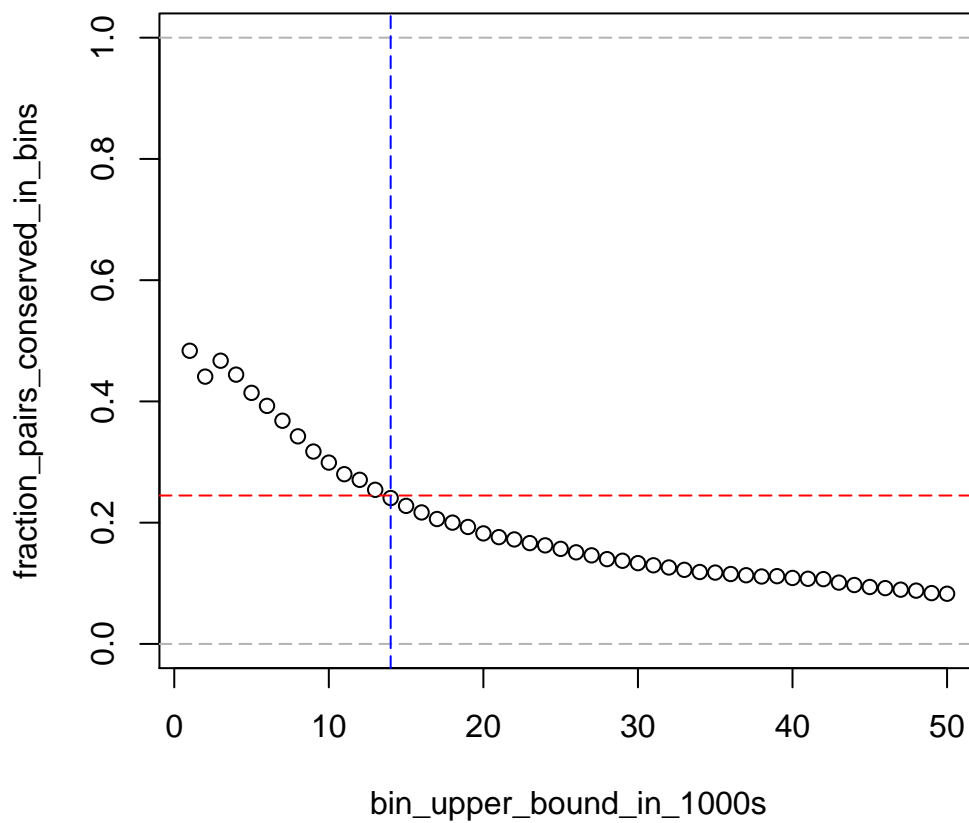

Supplement: s1 [file s1]

**Bin\_conservation\_minus\_bg\_CVB-1\_vs\_NTS-1**  
**PD-0.470848**

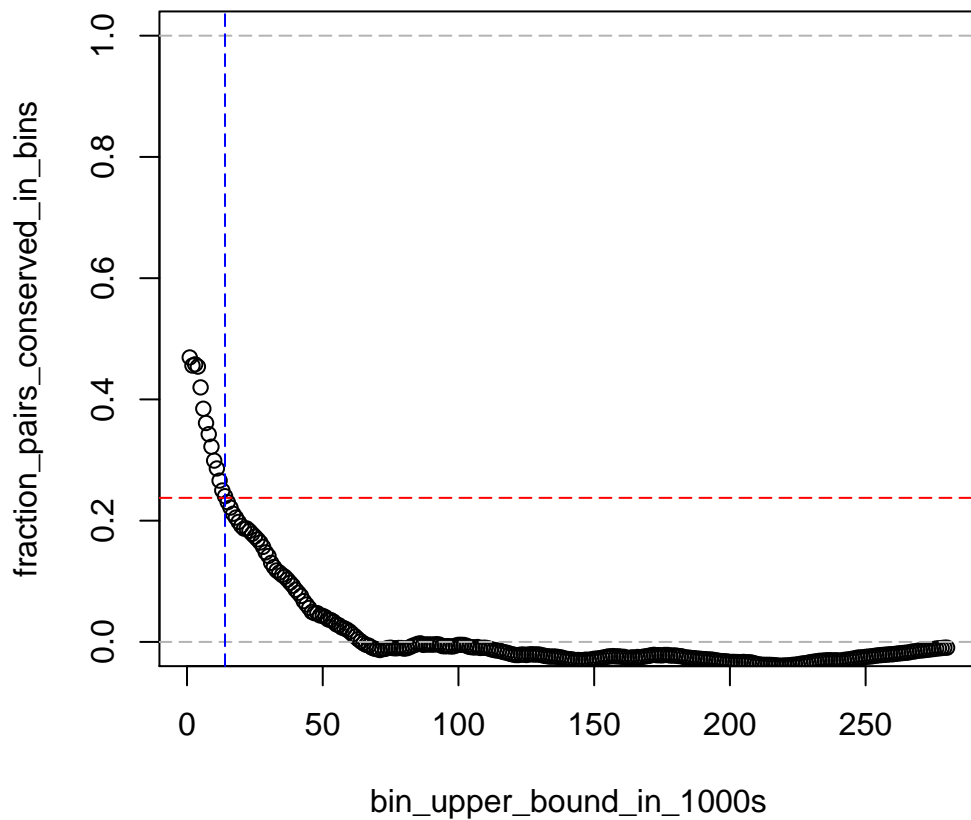

**Bin\_conservation\_minus\_bg\_CVB-1\_vs\_NTS-1**  
**PD-0.470848**

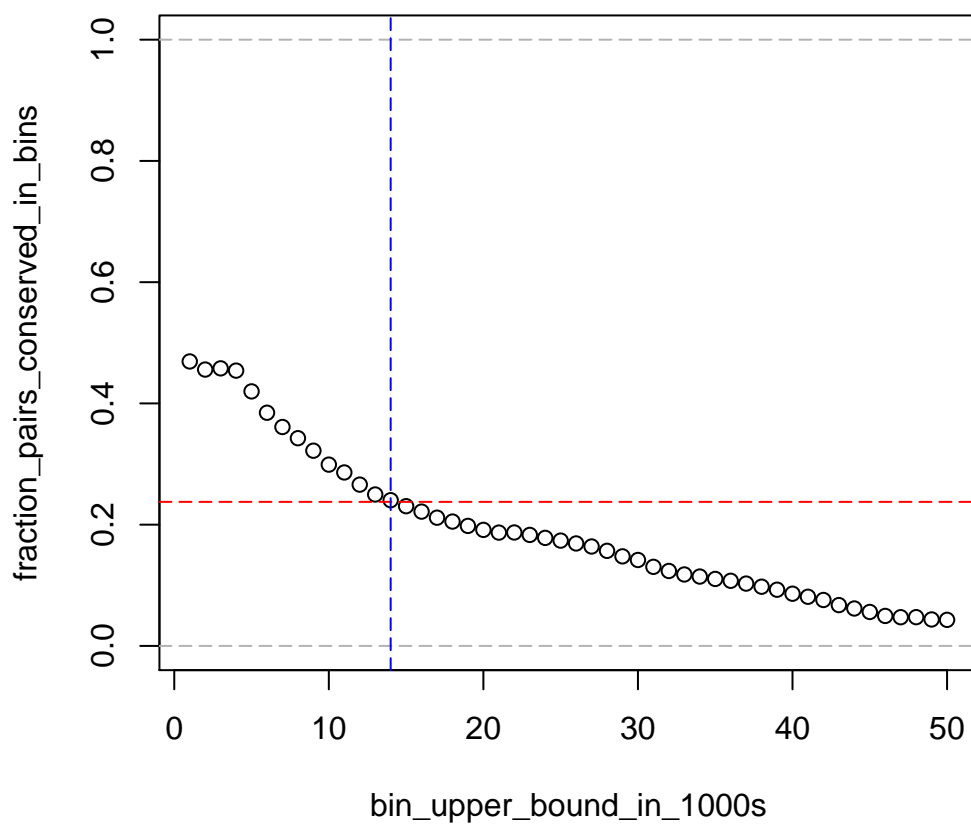

Supplement: s1 [file s1]

**Bin\_conservation\_minus\_bg\_MN0810.1\_vs\_NYs-1**  
**PD-0.700391**

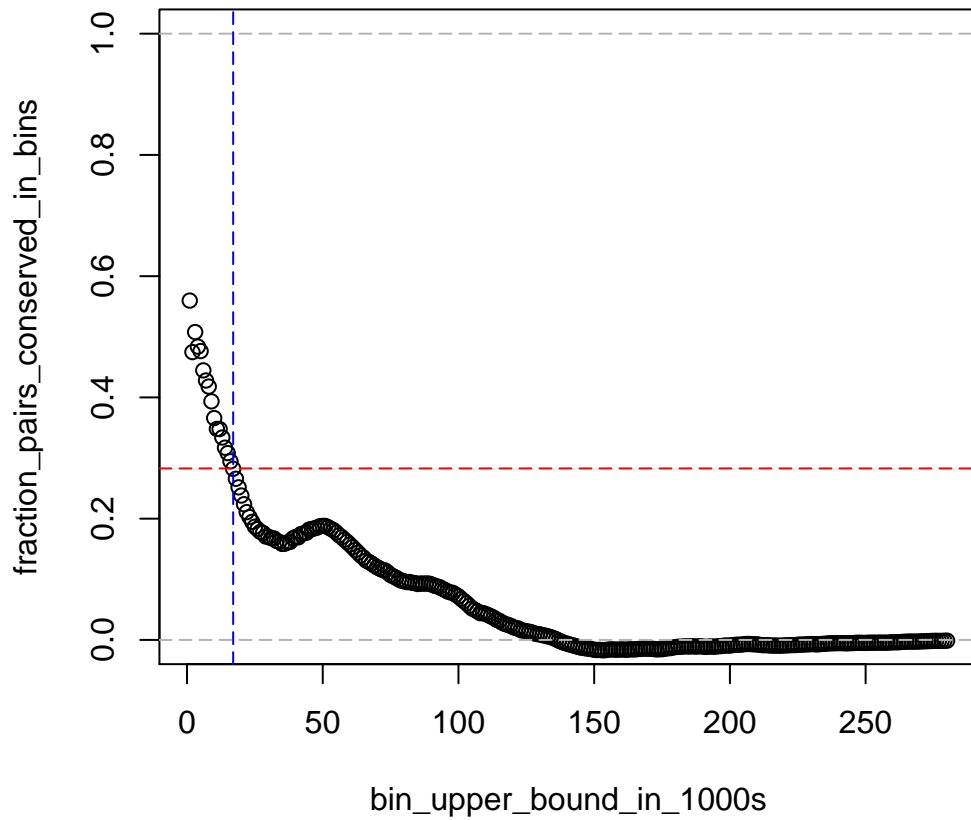

**Bin\_conservation\_minus\_bg\_MN0810.1\_vs\_NYs-1**  
**PD-0.700391**

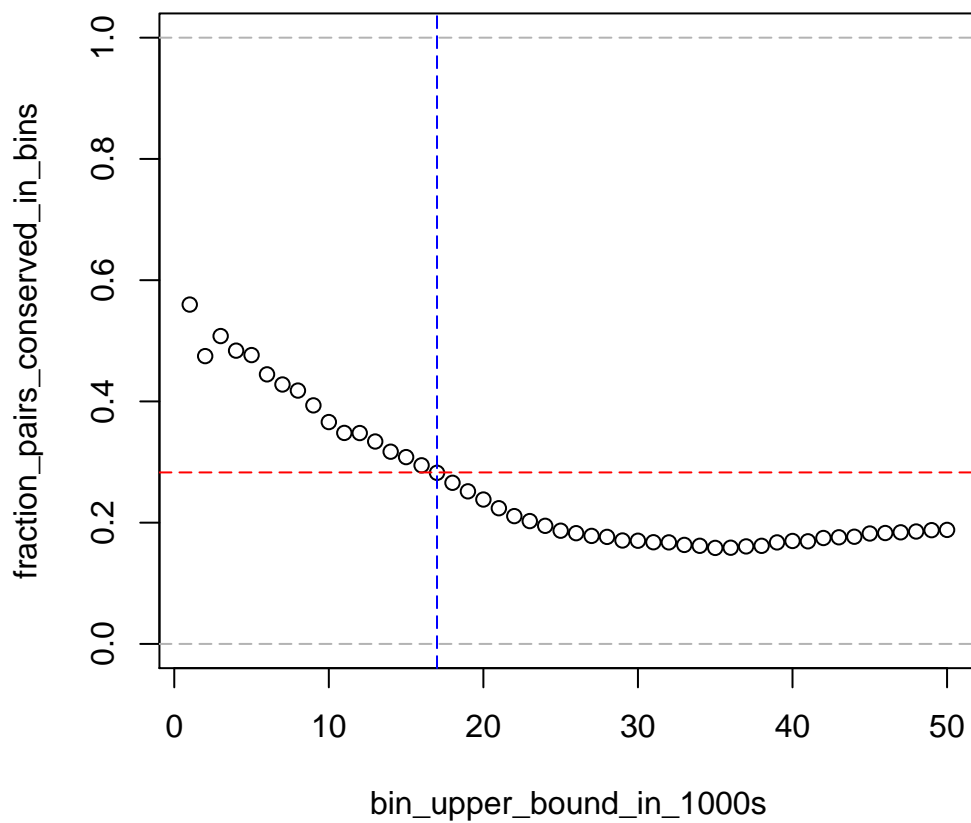

Supplement: s1 [file s1]

**Bin\_conservation\_minus\_bg\_MN0810.1\_vs\_TN603.4.2**  
**PD-0.100634**

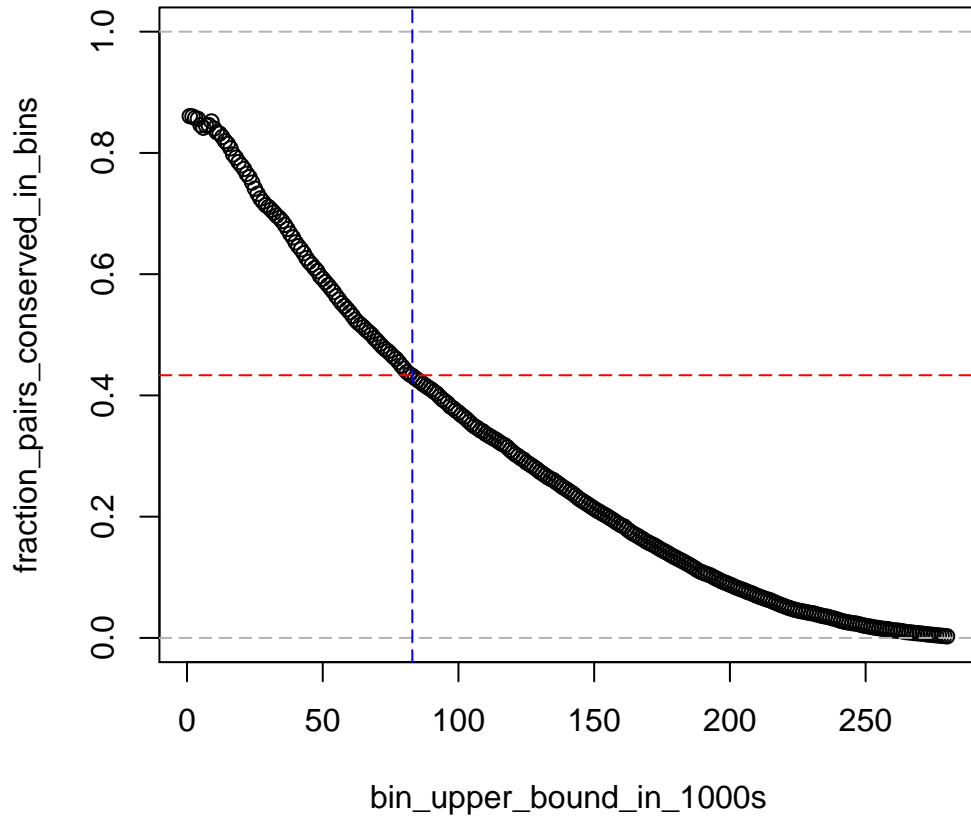

**Bin\_conservation\_minus\_bg\_MN0810.1\_vs\_TN603.4.2**  
**PD-0.100634**

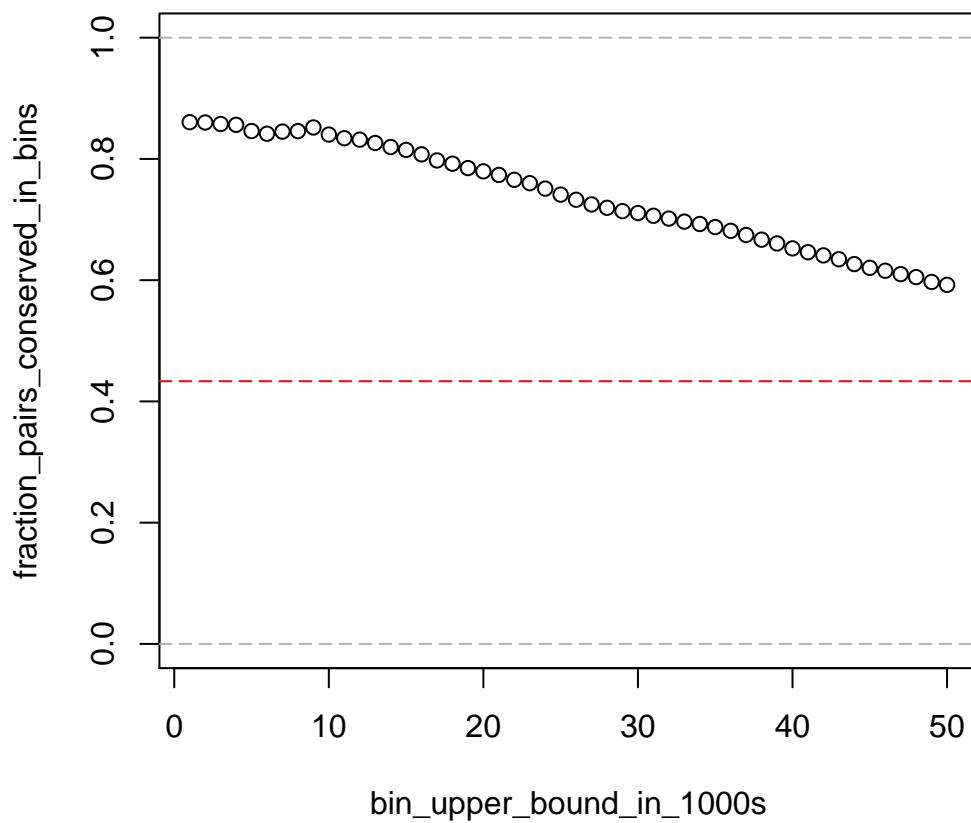

Supplement: s1 [file s1]

**Bin\_conservation\_minus\_bg\_IL-3A\_vs\_MT325**  
**PD-0.638118**

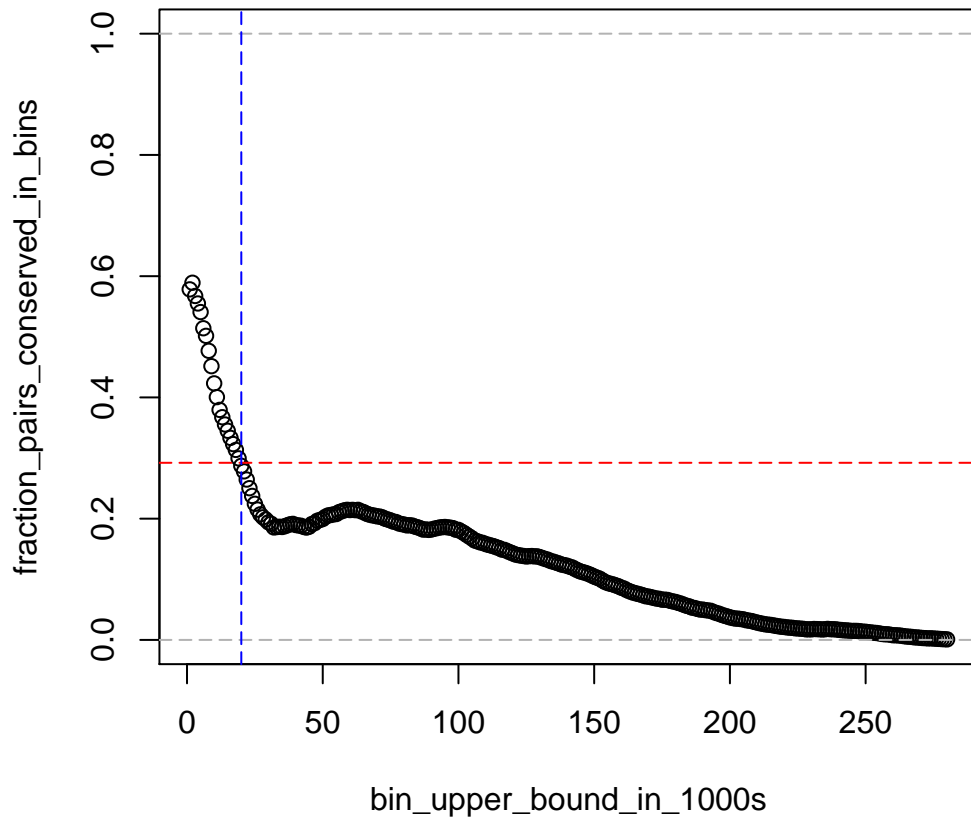

**Bin\_conservation\_minus\_bg\_IL-3A\_vs\_MT325**  
**PD-0.638118**

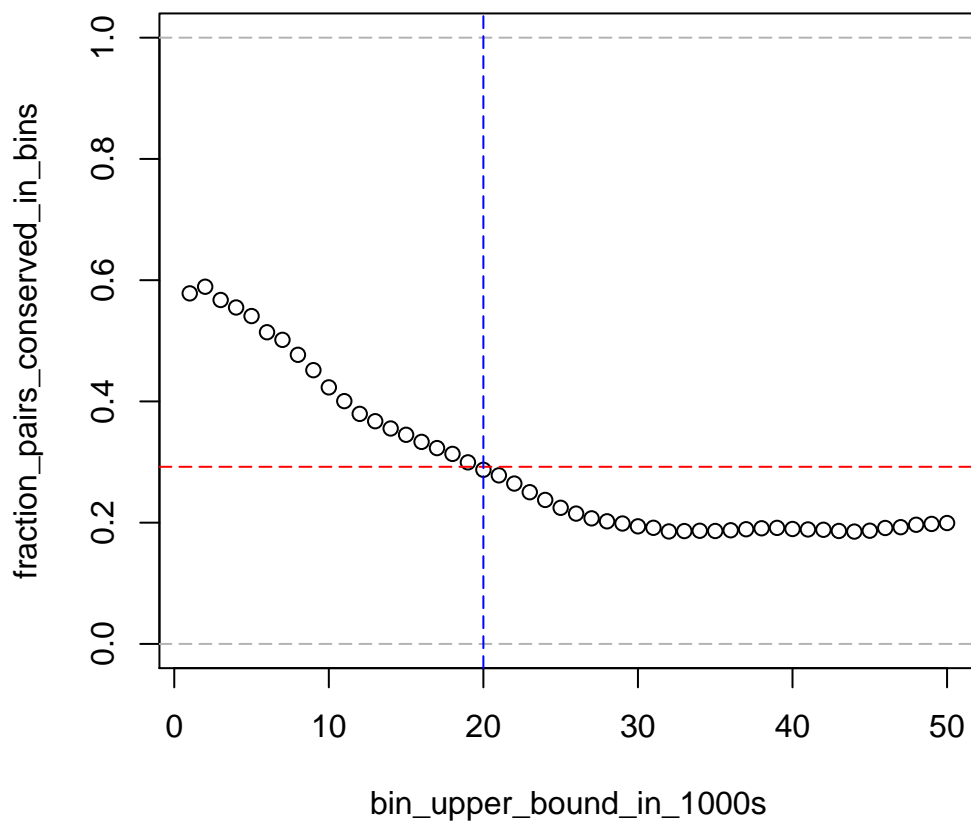

Supplement: s1 [file s1]

**Bin\_conservation\_minus\_bg\_MA-1E\_vs\_NYs-1**  
**PD-0.148011**

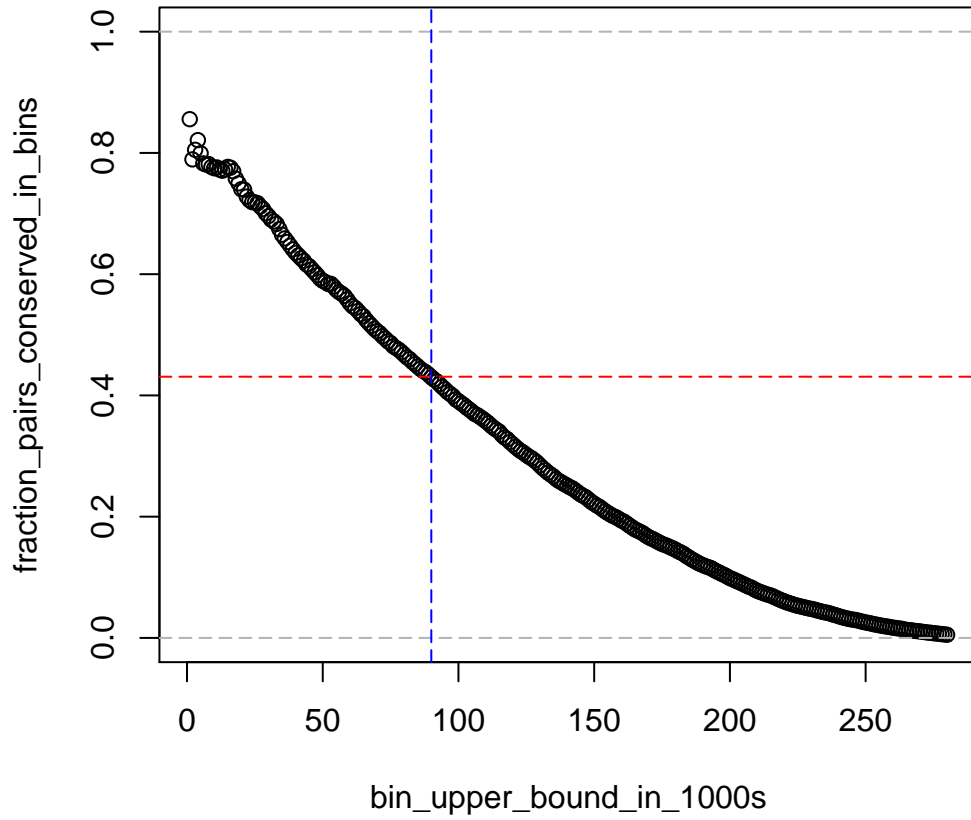

**Bin\_conservation\_minus\_bg\_MA-1E\_vs\_NYs-1**  
**PD-0.148011**

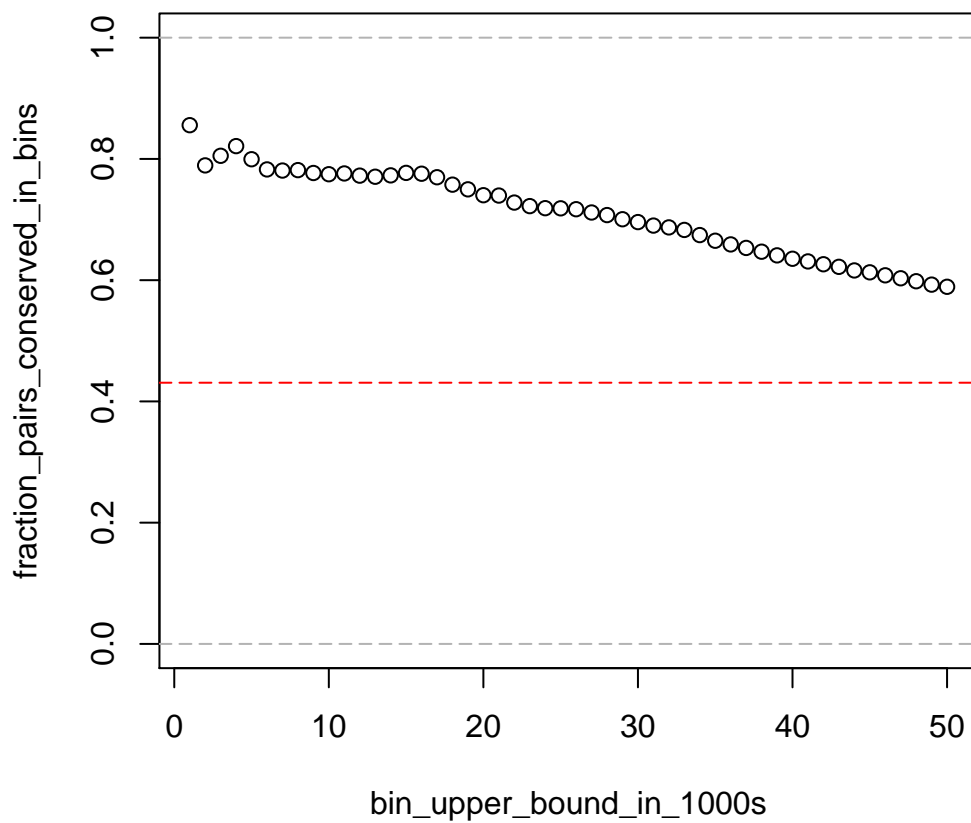

Supplement: s1 [file s1]

**Bin\_conservation\_minus\_bg\_CVB-1\_vs\_CvsA1**  
**PD-0.668415**

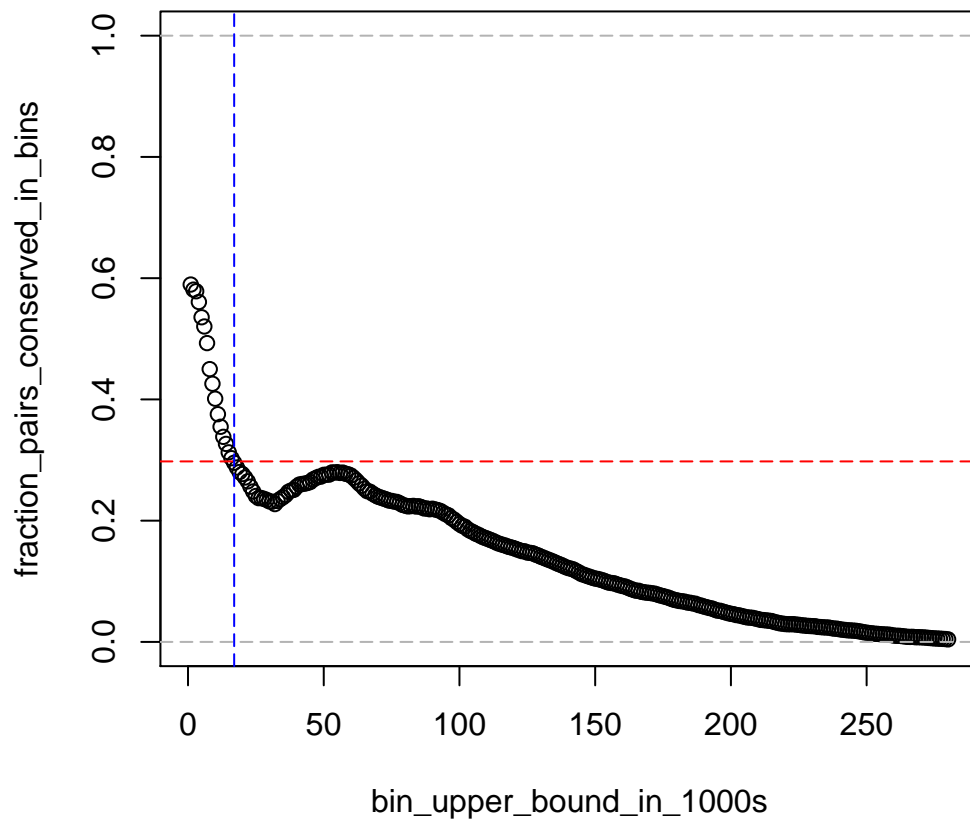

**Bin\_conservation\_minus\_bg\_CVB-1\_vs\_CvsA1**  
**PD-0.668415**

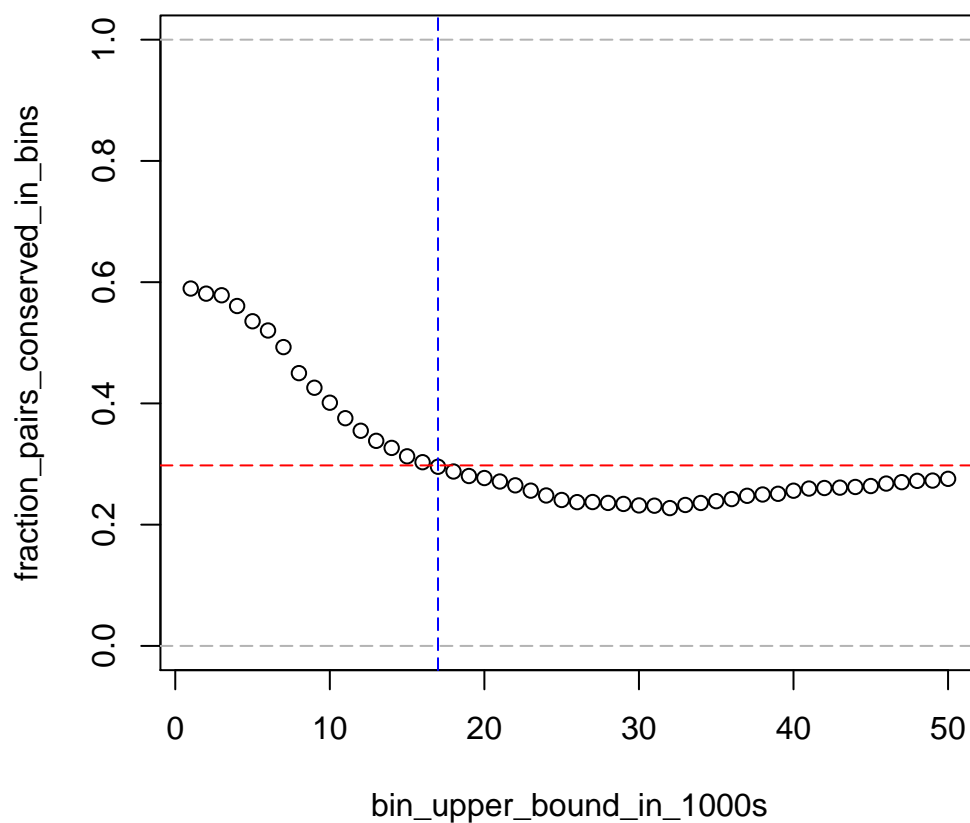

Supplement: s1 [file s1]

**Bin\_conservation\_minus\_bg\_ATCV1\_vs\_CVA-1**  
**PD-0.456961**

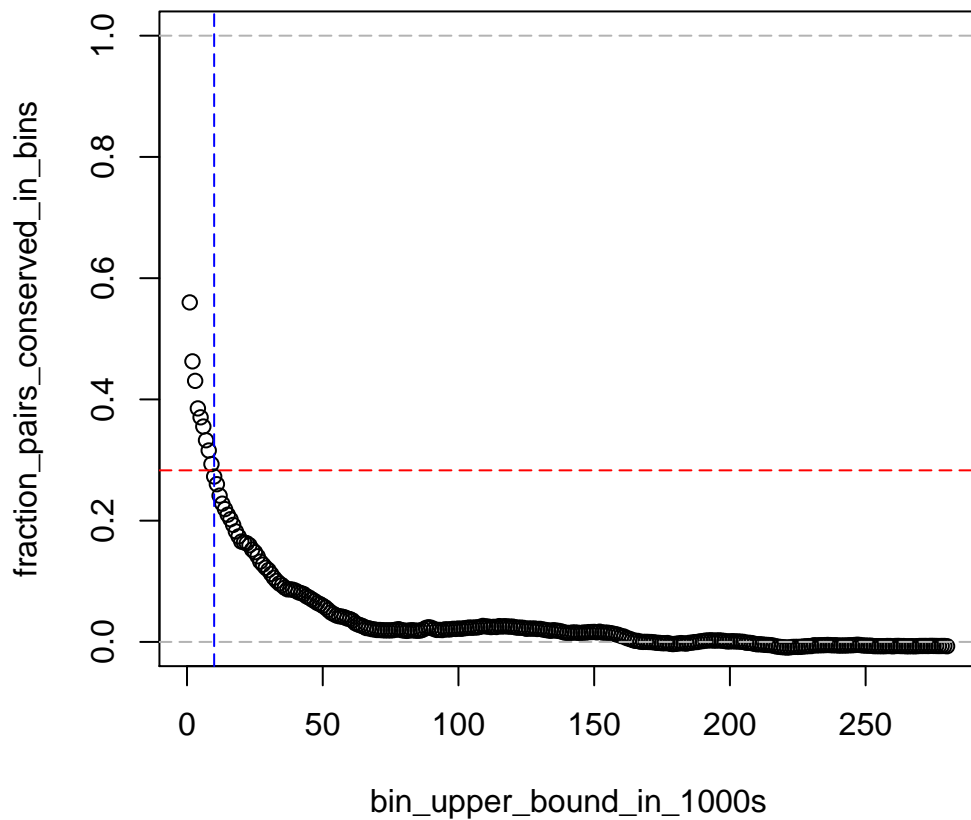

**Bin\_conservation\_minus\_bg\_ATCV1\_vs\_CVA-1**  
**PD-0.456961**

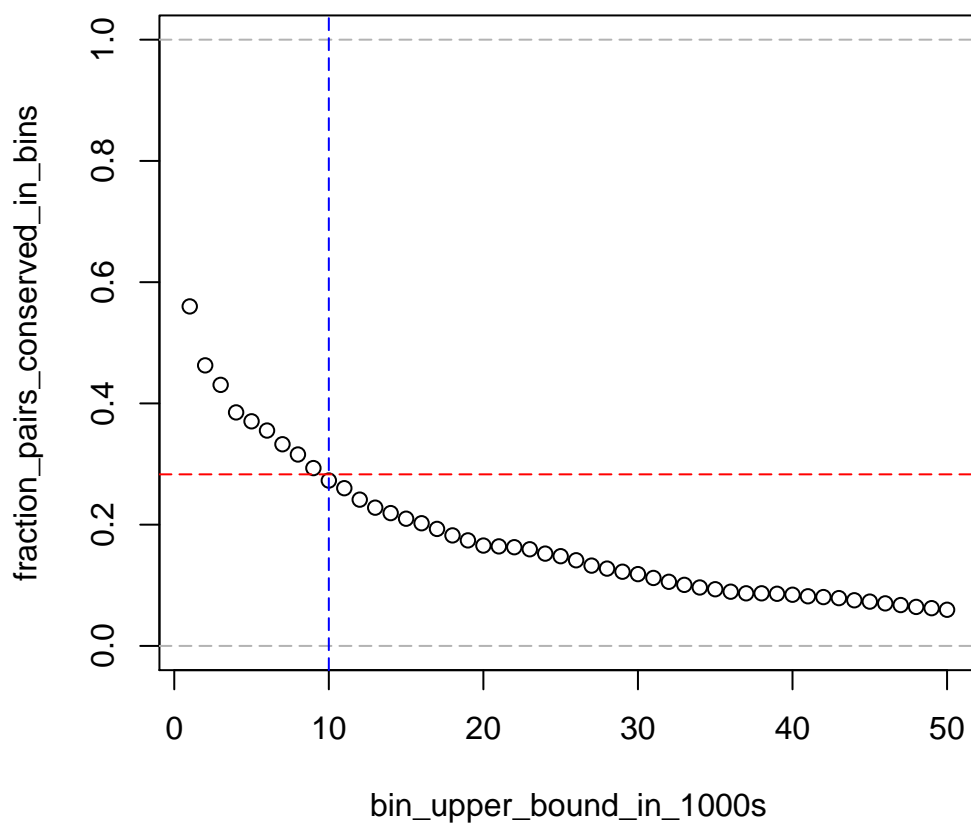

Supplement: s1 [file s1]

**Bin\_conservation\_minus\_bg\_AR158\_vs\_IL-5-2s1**  
**PD-0.012243**

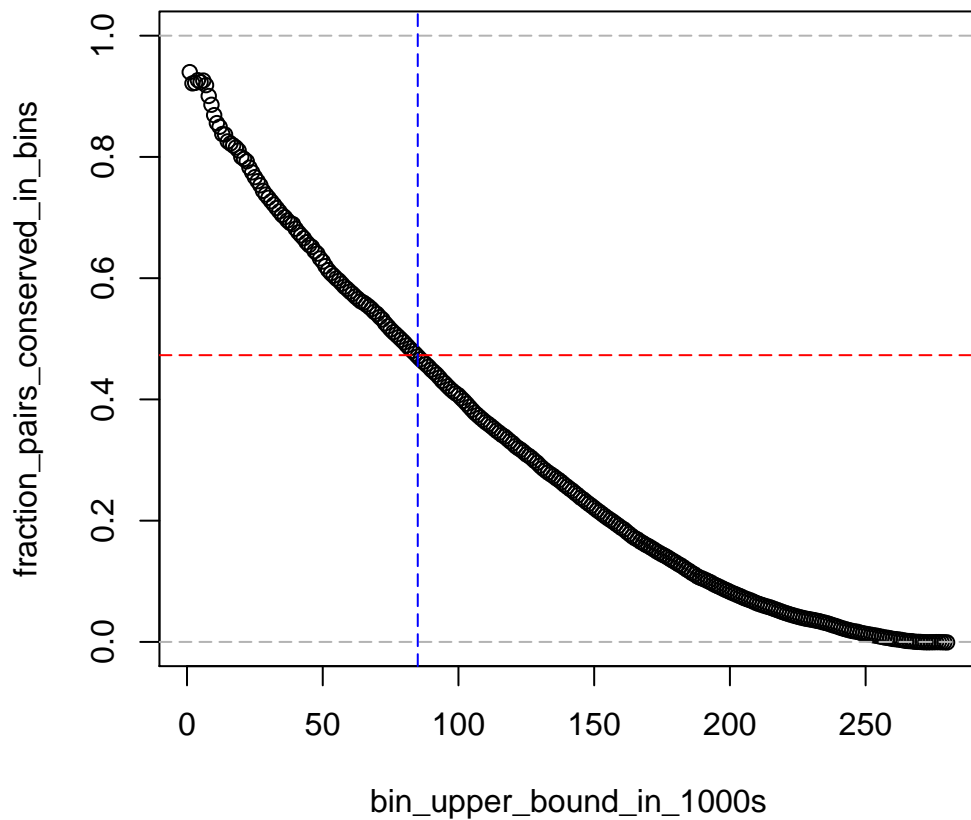

**Bin\_conservation\_minus\_bg\_AR158\_vs\_IL-5-2s1**  
**PD-0.012243**

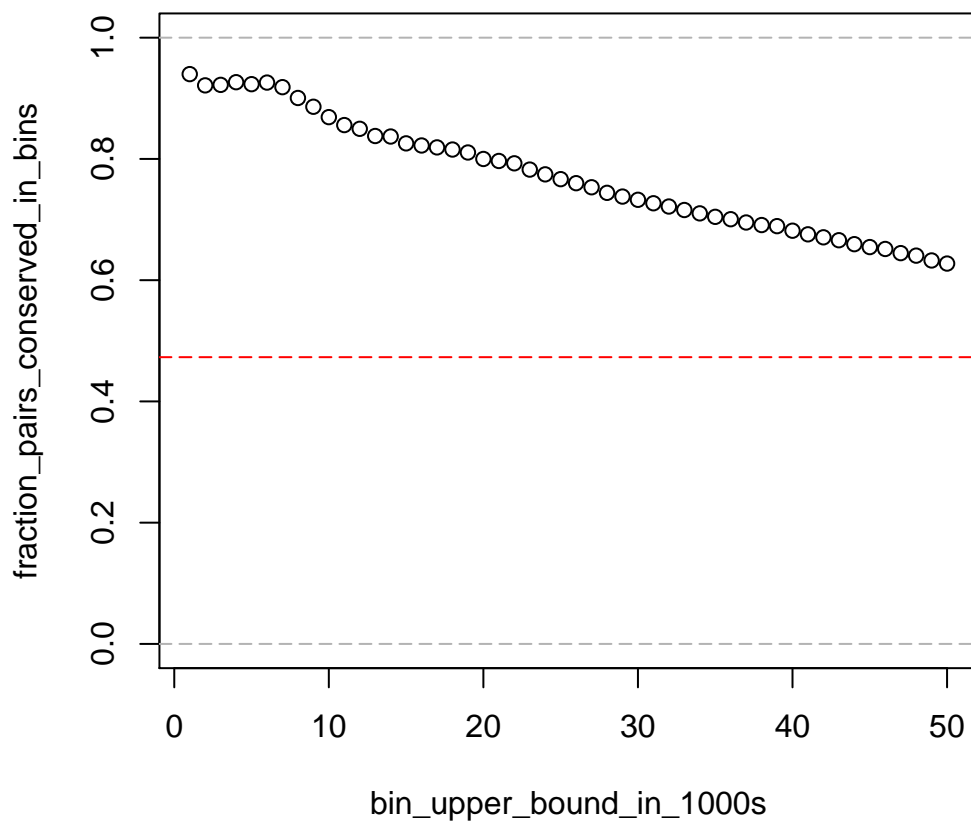

Supplement: s1 [file s1]

**Bin\_conservation\_minus\_bg\_Fr5L\_vs\_GM0701.1**  
**PD-0.448931**

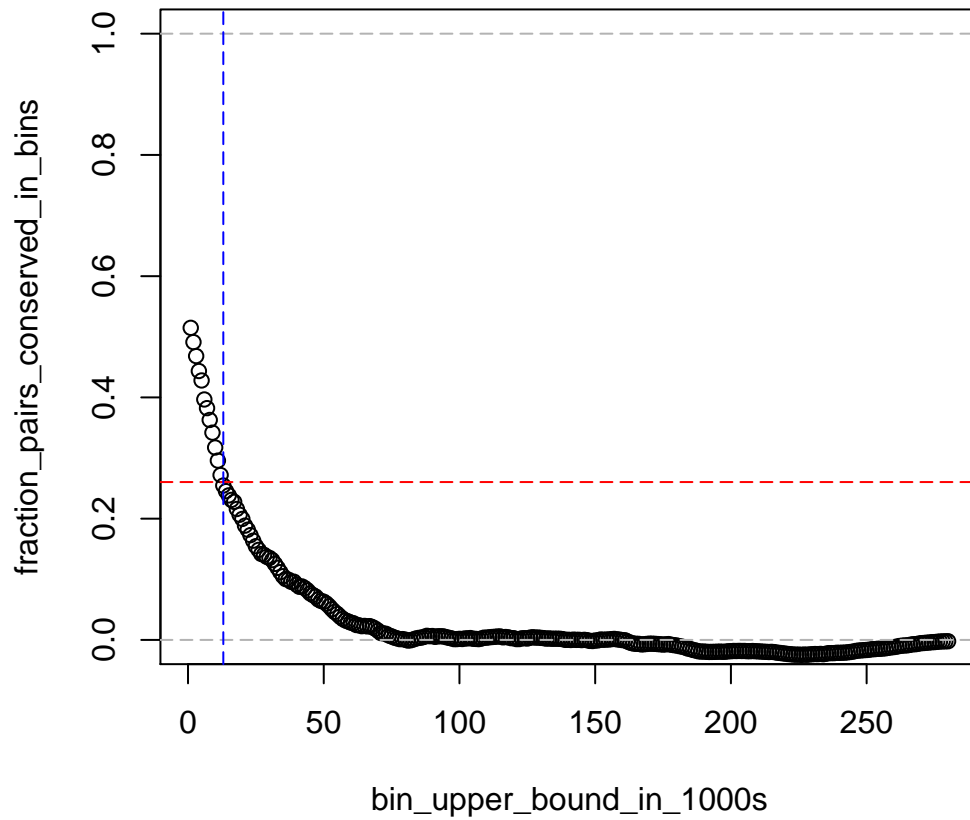

**Bin\_conservation\_minus\_bg\_Fr5L\_vs\_GM0701.1**  
**PD-0.448931**

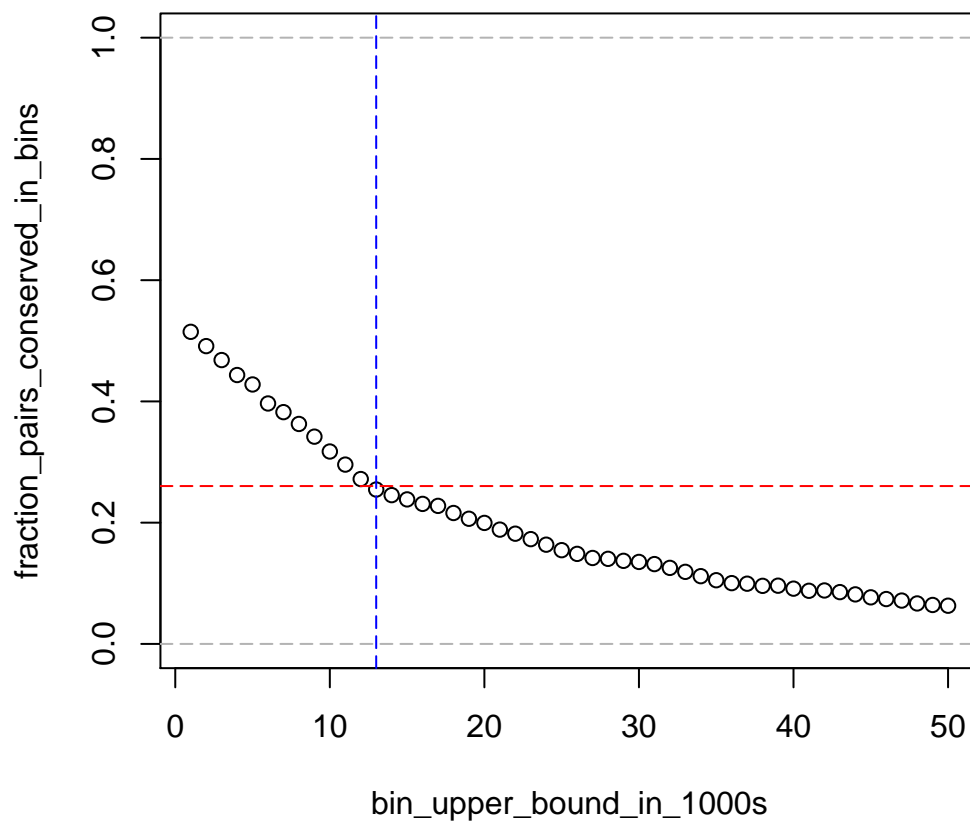

Supplement: s1 [file s1]

**Bin\_conservation\_minus\_bg\_MN0810.1\_vs\_NE-JV-4**  
**PD-0.679398**

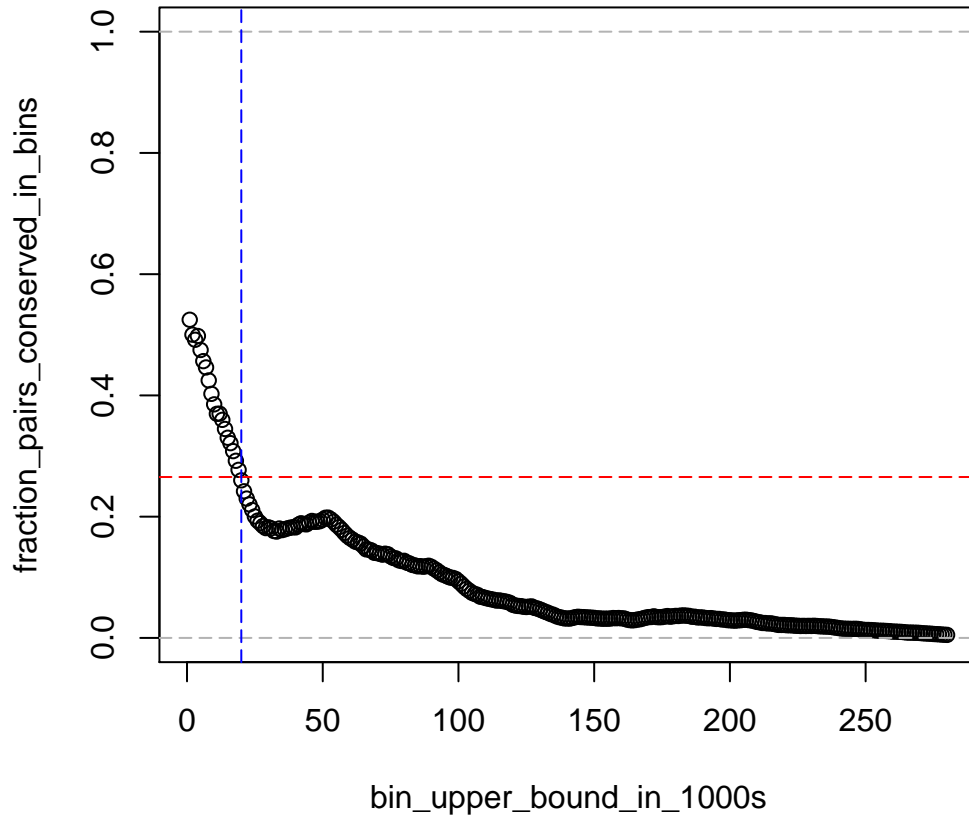

**Bin\_conservation\_minus\_bg\_MN0810.1\_vs\_NE-JV-4**  
**PD-0.679398**

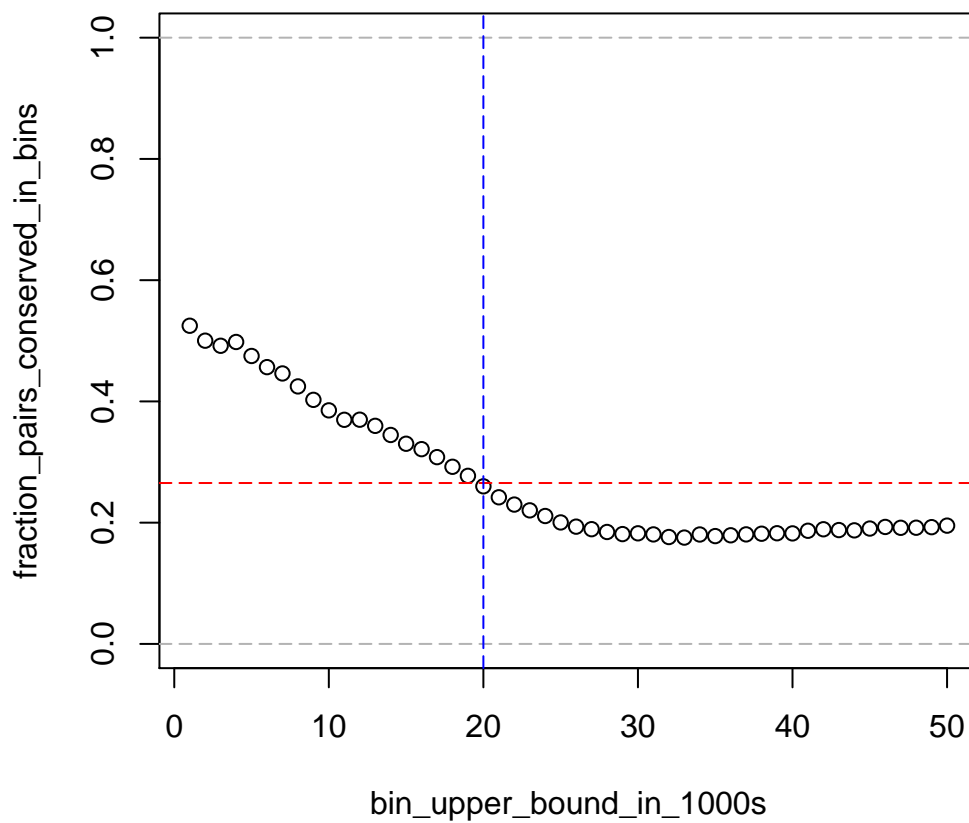

Supplement: s1 [file s1]

**Bin\_conservation\_minus\_bg\_AP110A\_vs\_OR0704.2.2**  
**PD-0.038522**

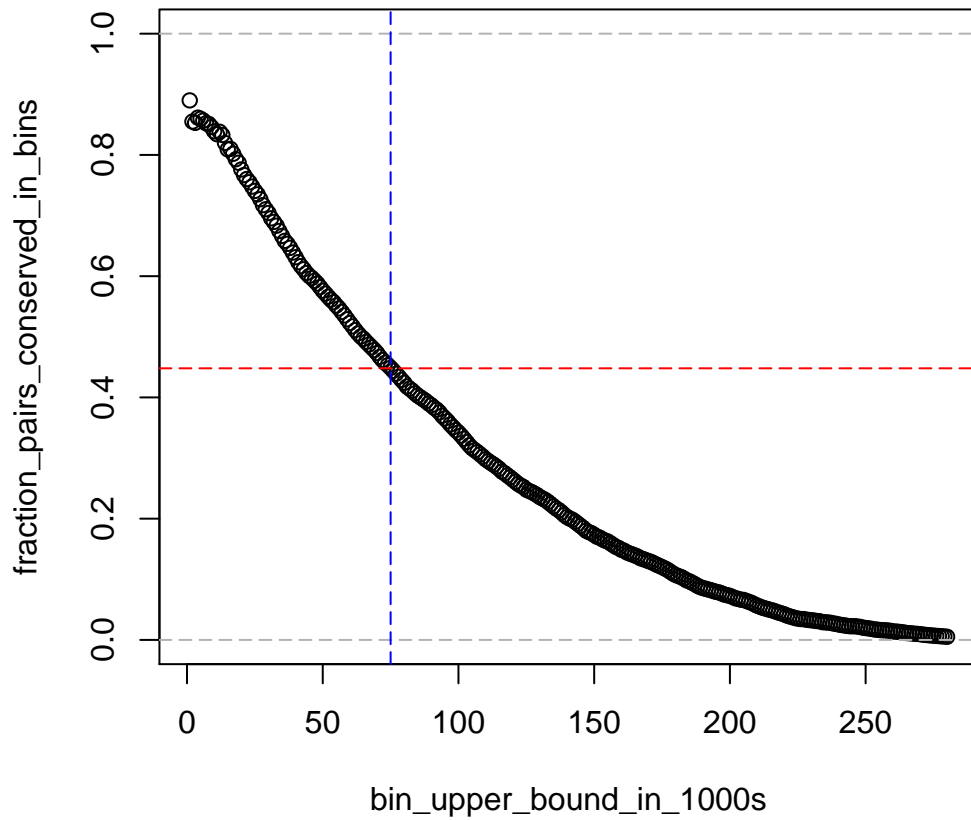

**Bin\_conservation\_minus\_bg\_AP110A\_vs\_OR0704.2.2**  
**PD-0.038522**

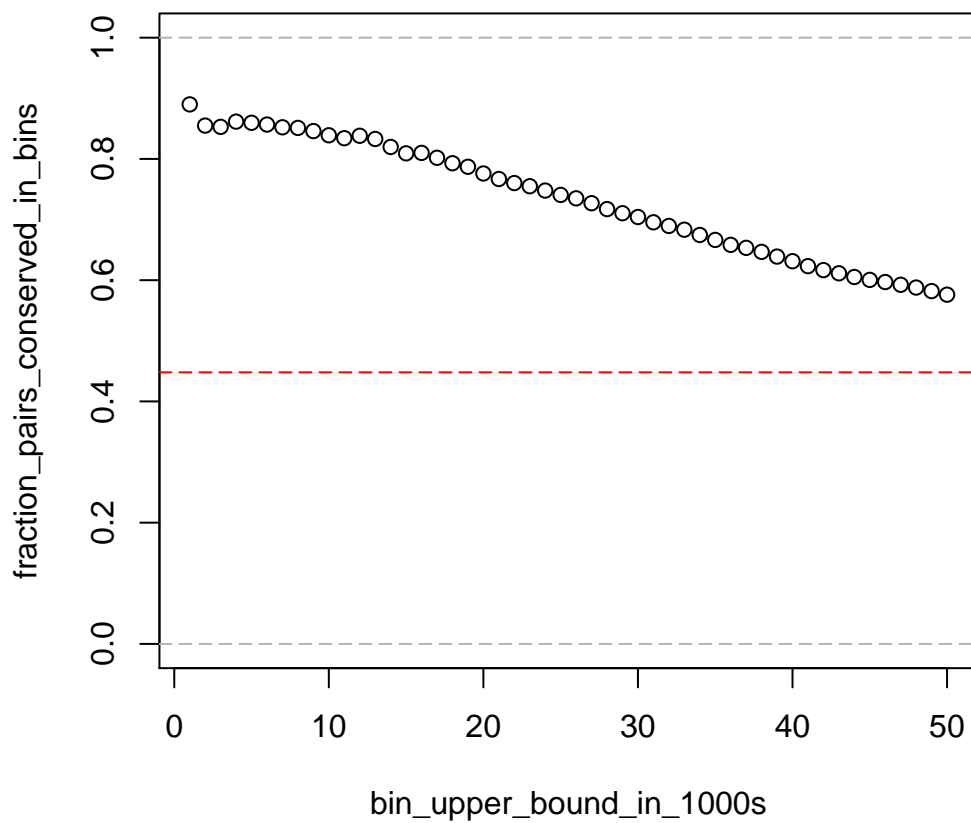

Supplement: s1 [file s1]

**Bin\_conservation\_minus\_bg\_NE-JV-1\_vs\_WI0606**  
**PD-0.497907**

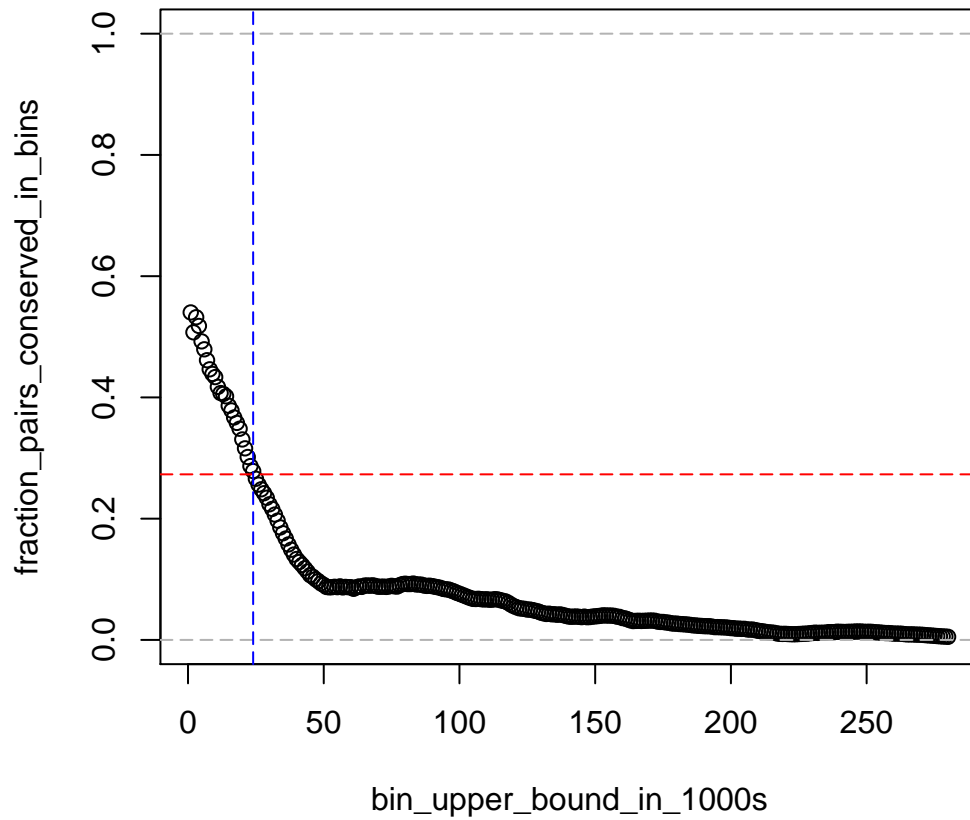

**Bin\_conservation\_minus\_bg\_NE-JV-1\_vs\_WI0606**  
**PD-0.497907**

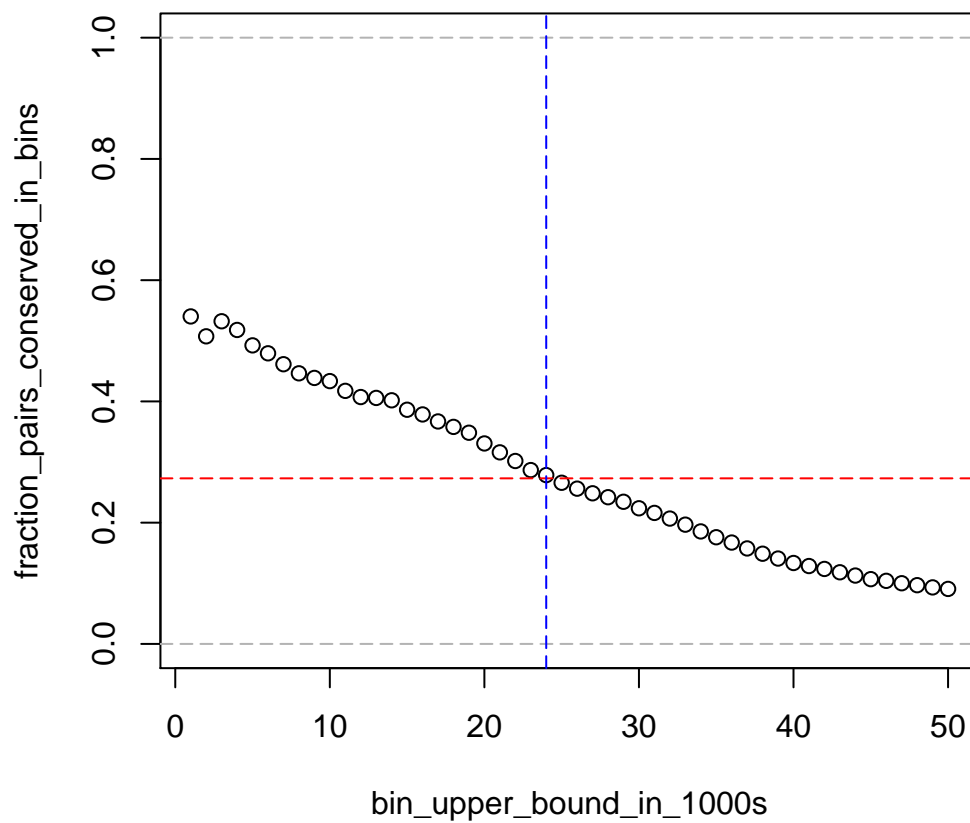

Supplement: s1 [file s1]

**Bin\_conservation\_minus\_bg\_CVR-1\_vs\_FR483**  
**PD-0.018334**

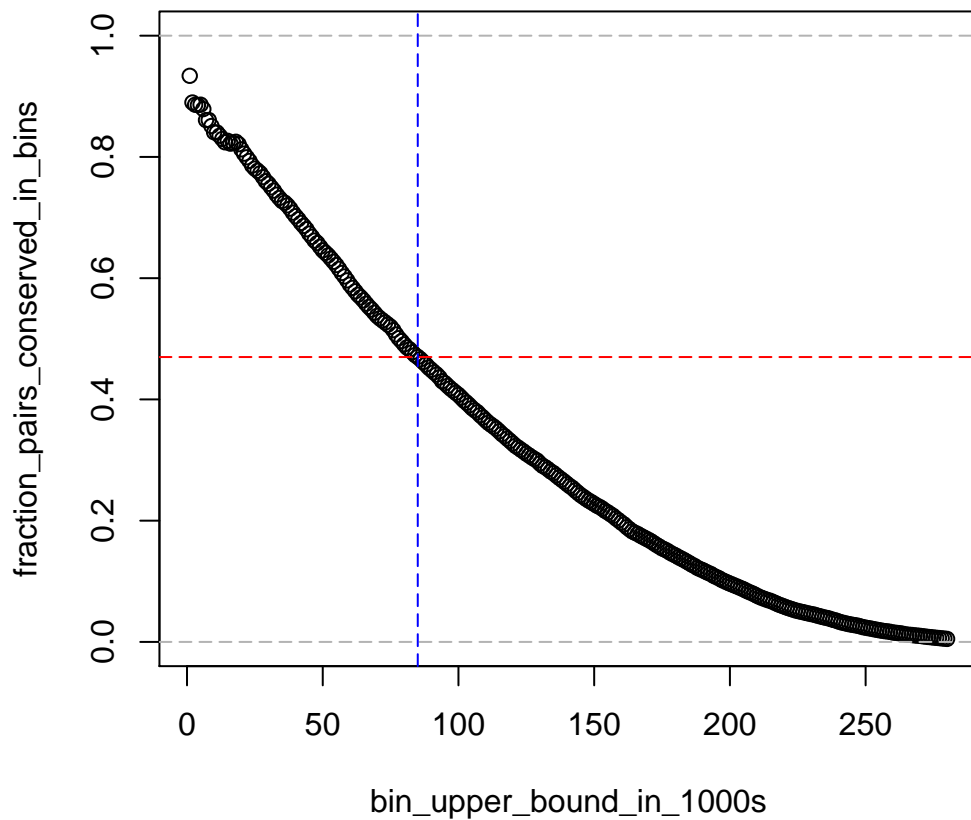

**Bin\_conservation\_minus\_bg\_CVR-1\_vs\_FR483**  
**PD-0.018334**

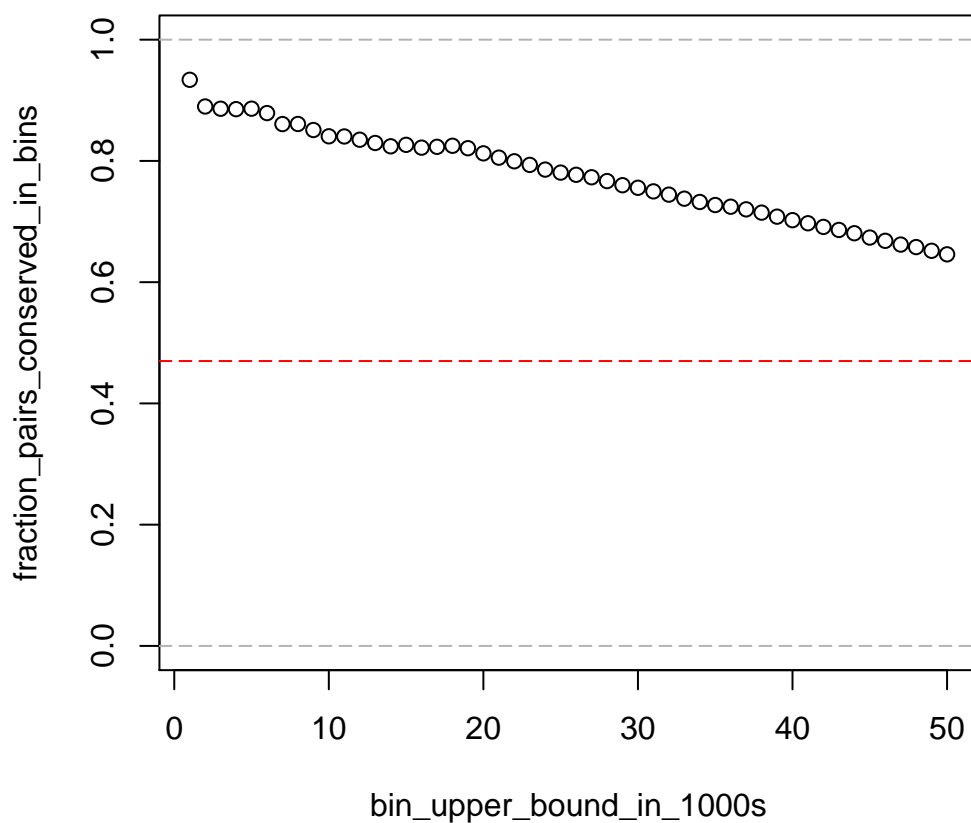

Supplement: s1 [file s1]

**Bin\_conservation\_minus\_bg\_Can0610SP\_vs\_MN0810.1**  
**PD-0.111222**

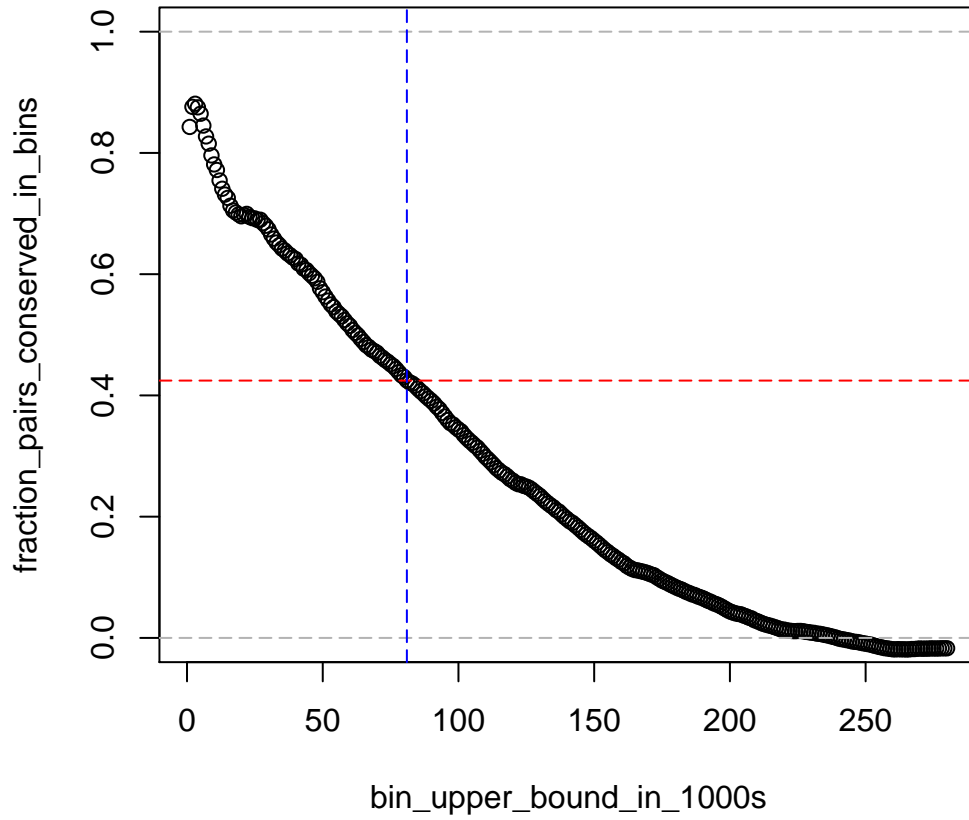

**Bin\_conservation\_minus\_bg\_Can0610SP\_vs\_MN0810.1**  
**PD-0.111222**

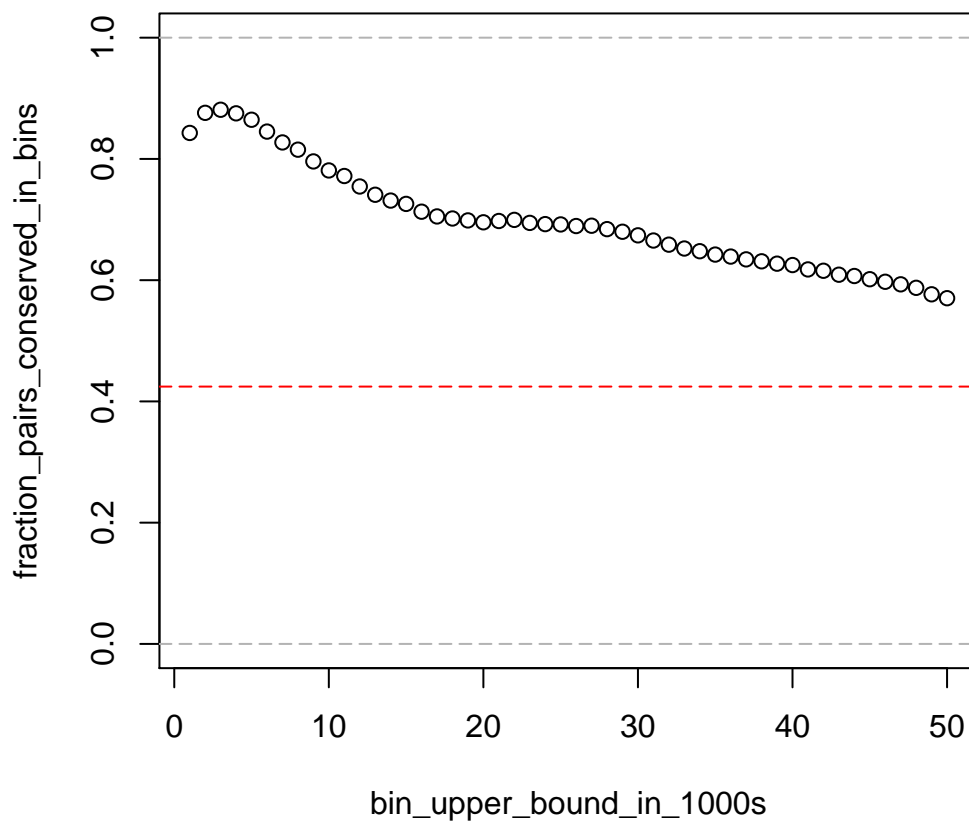

Supplement: s1 [file s1]

**Bin\_conservation\_minus\_bg\_CVR-1\_vs\_NE-JV-1**  
**PD-0.355029**

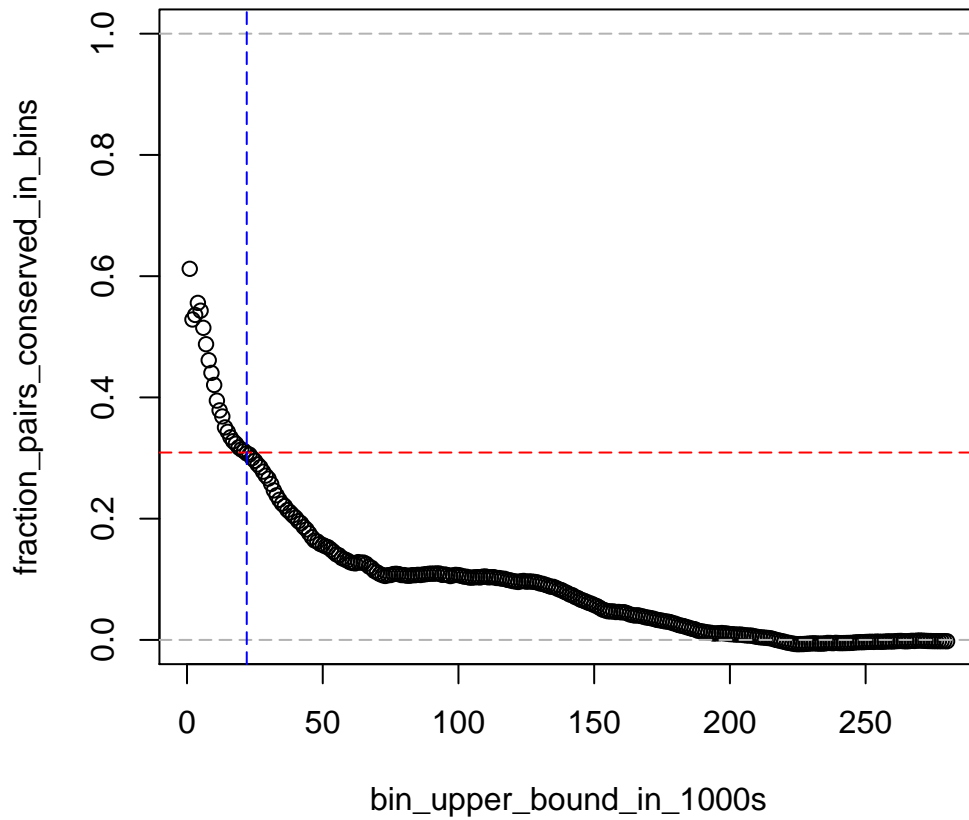

**Bin\_conservation\_minus\_bg\_CVR-1\_vs\_NE-JV-1**  
**PD-0.355029**

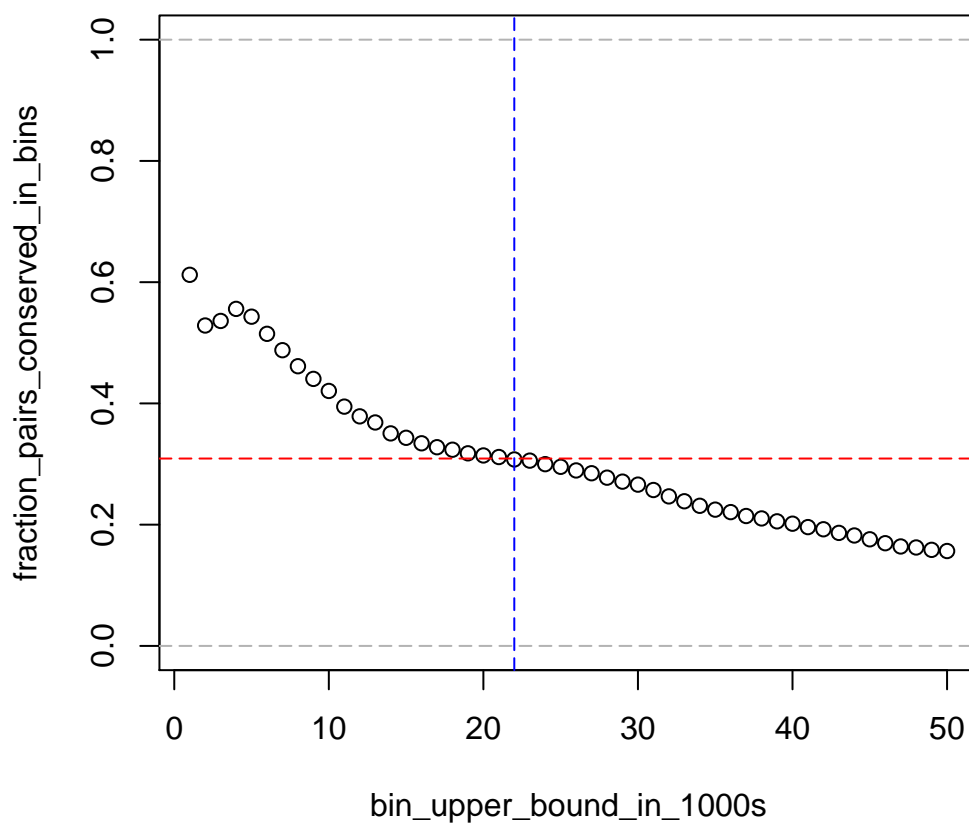

Supplement: s1 [file s1]

**Bin\_conservation\_minus\_bg\_CZ-2\_vs\_FR483**  
**PD-0.046686**

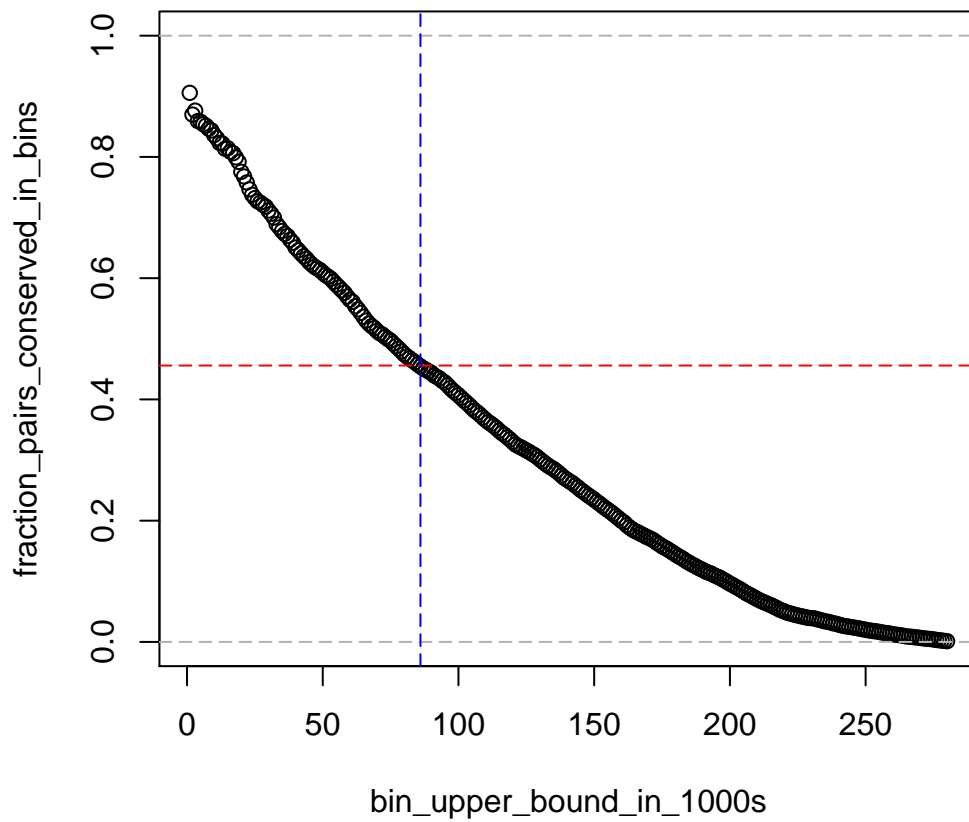

**Bin\_conservation\_minus\_bg\_CZ-2\_vs\_FR483**  
**PD-0.046686**

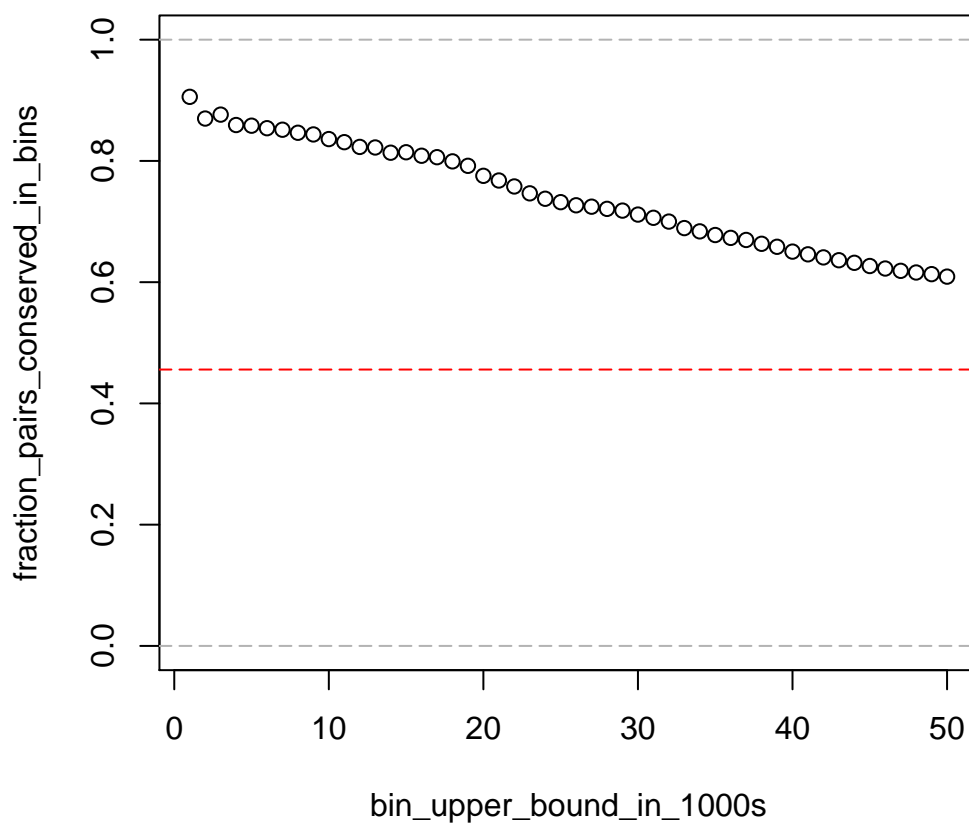

Supplement: s1 [file s1]

**Bin\_conservation\_minus\_bg\_FR483\_vs\_MA-1D**  
**PD-0.663832**

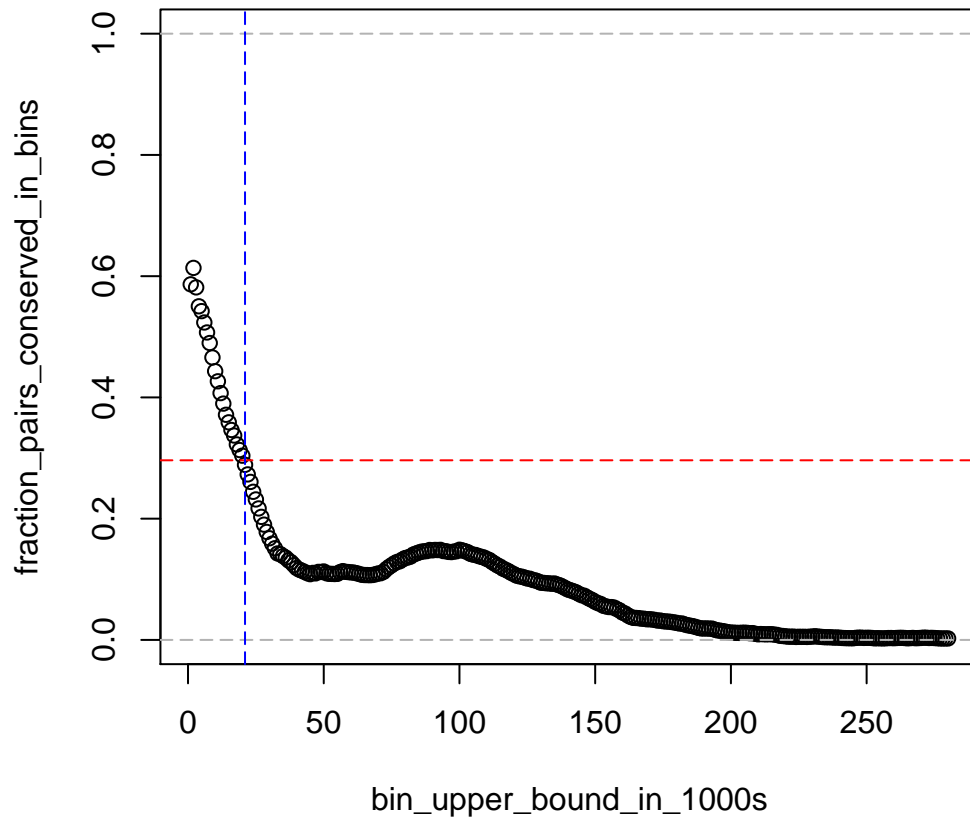

**Bin\_conservation\_minus\_bg\_FR483\_vs\_MA-1D**  
**PD-0.663832**

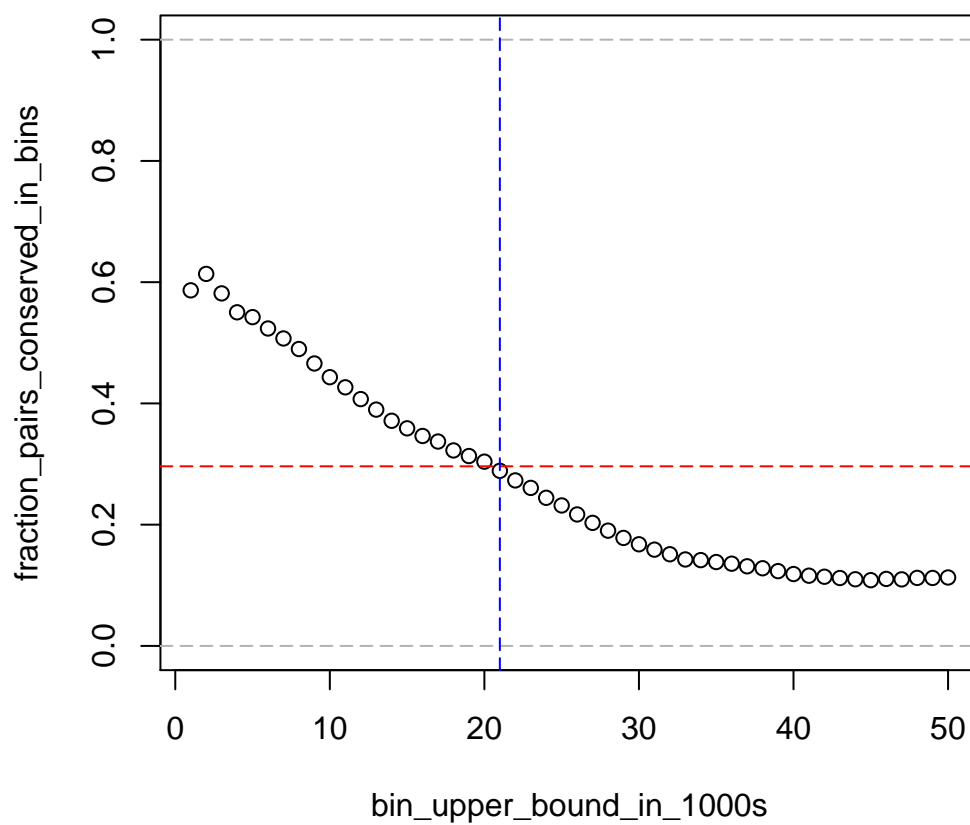

Supplement: s1 [file s1]

**Bin\_conservation\_minus\_bg\_KS1B\_vs\_TN603.4.2**  
**PD-0.683042**

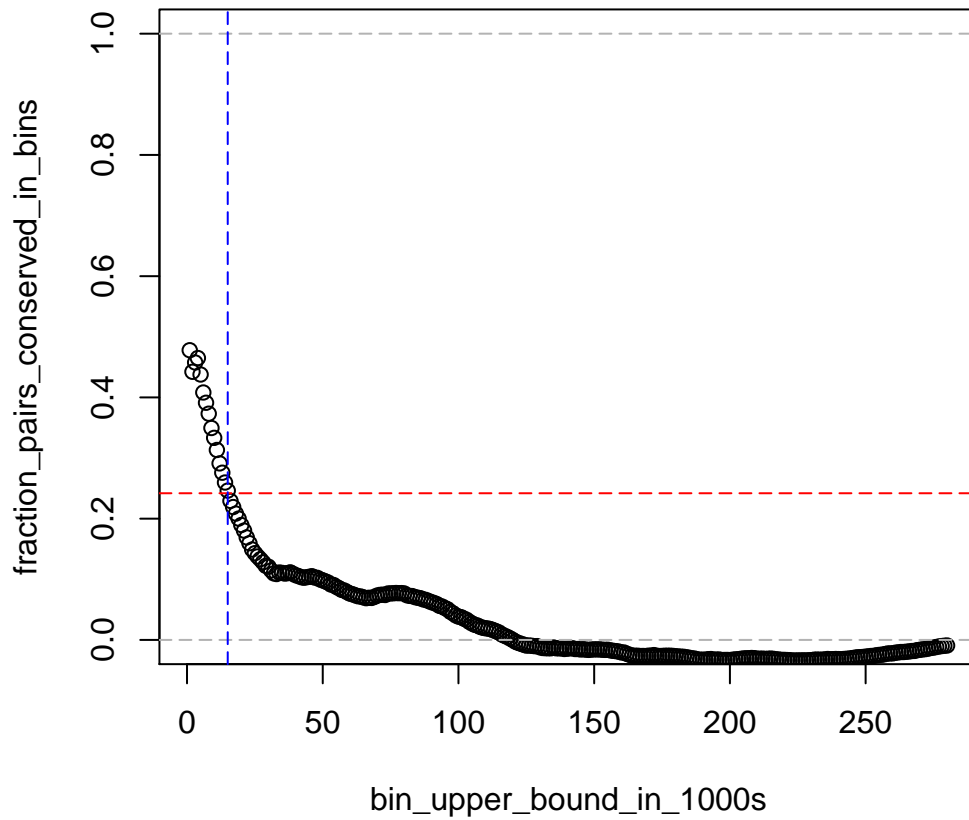

**Bin\_conservation\_minus\_bg\_KS1B\_vs\_TN603.4.2**  
**PD-0.683042**

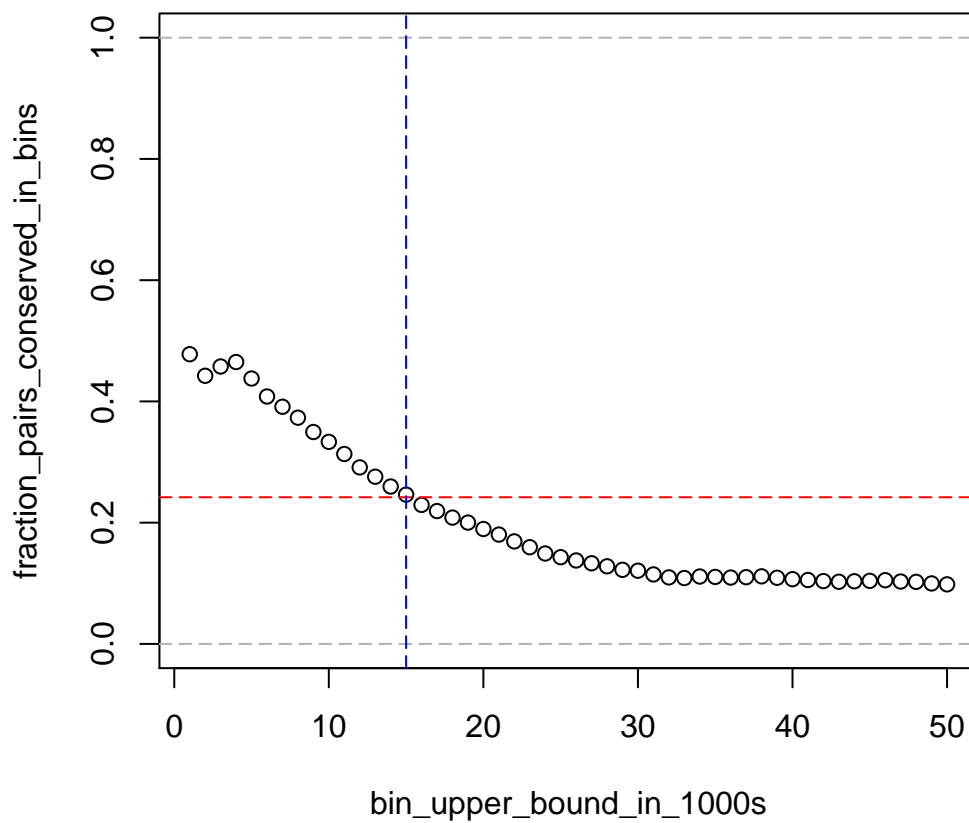

Supplement: s1 [file s1]

**Bin\_conservation\_minus\_bg\_Canal-1\_vs\_IL-3A**  
**PD-0.681792**

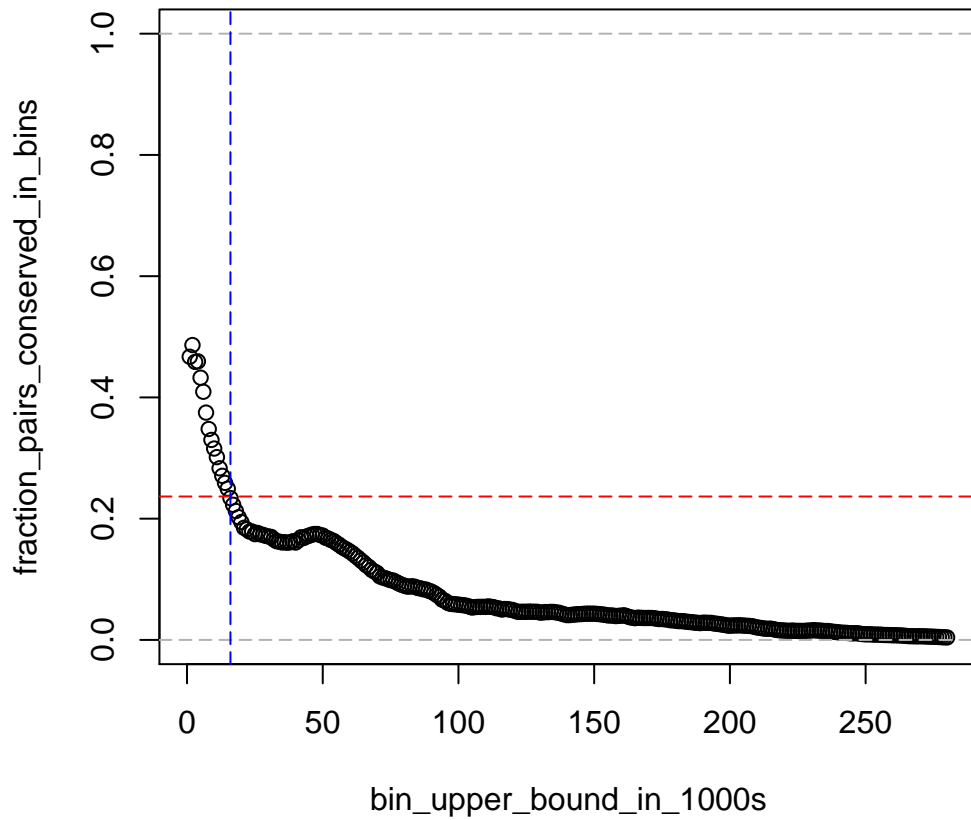

**Bin\_conservation\_minus\_bg\_Canal-1\_vs\_IL-3A**  
**PD-0.681792**

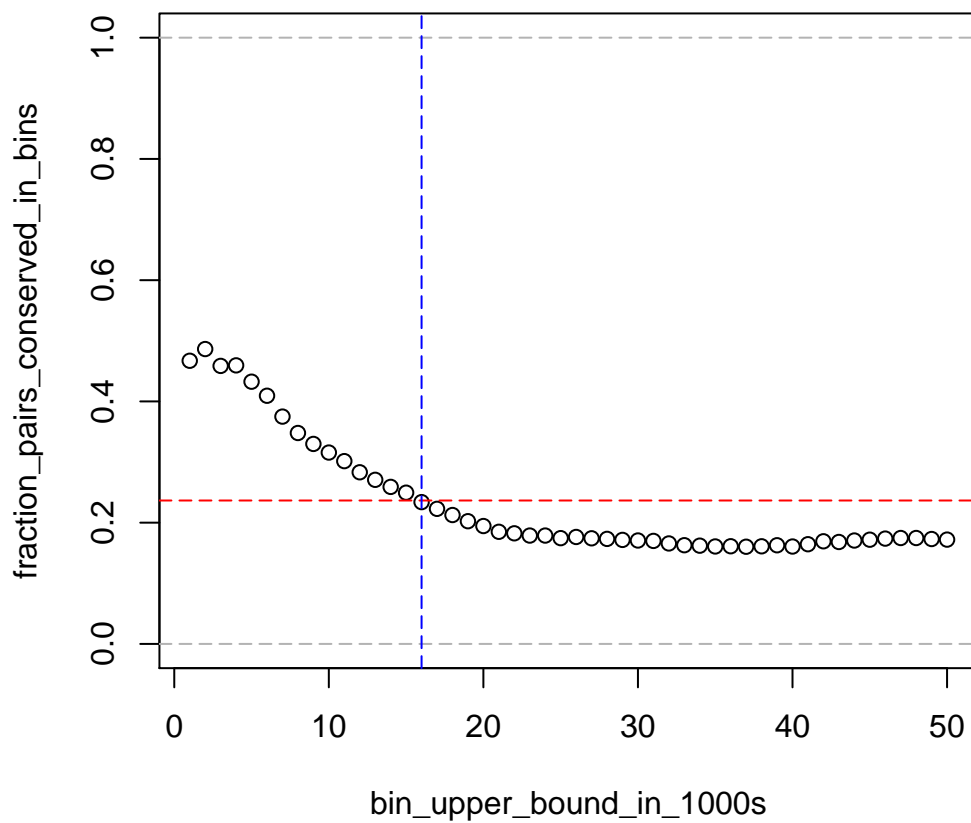

Supplement: s1 [file s1]

**Bin\_conservation\_minus\_bg\_ATCV1\_vs\_MO0605SPH**  
**PD-0.011911**

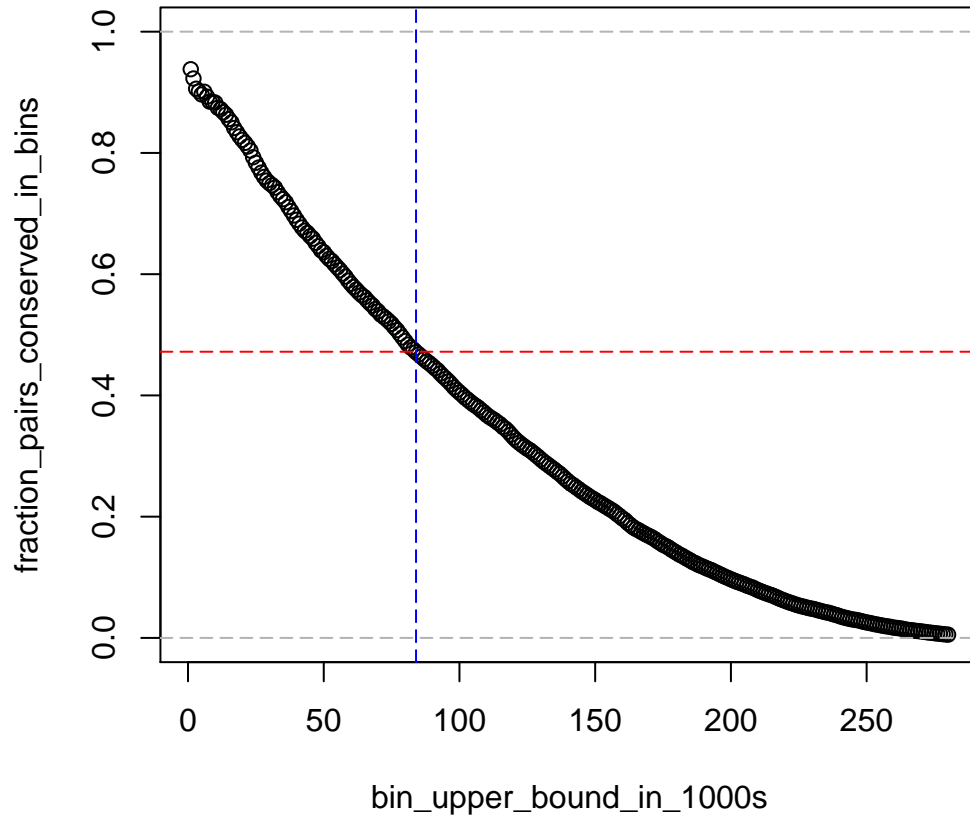

**Bin\_conservation\_minus\_bg\_ATCV1\_vs\_MO0605SPH**  
**PD-0.011911**

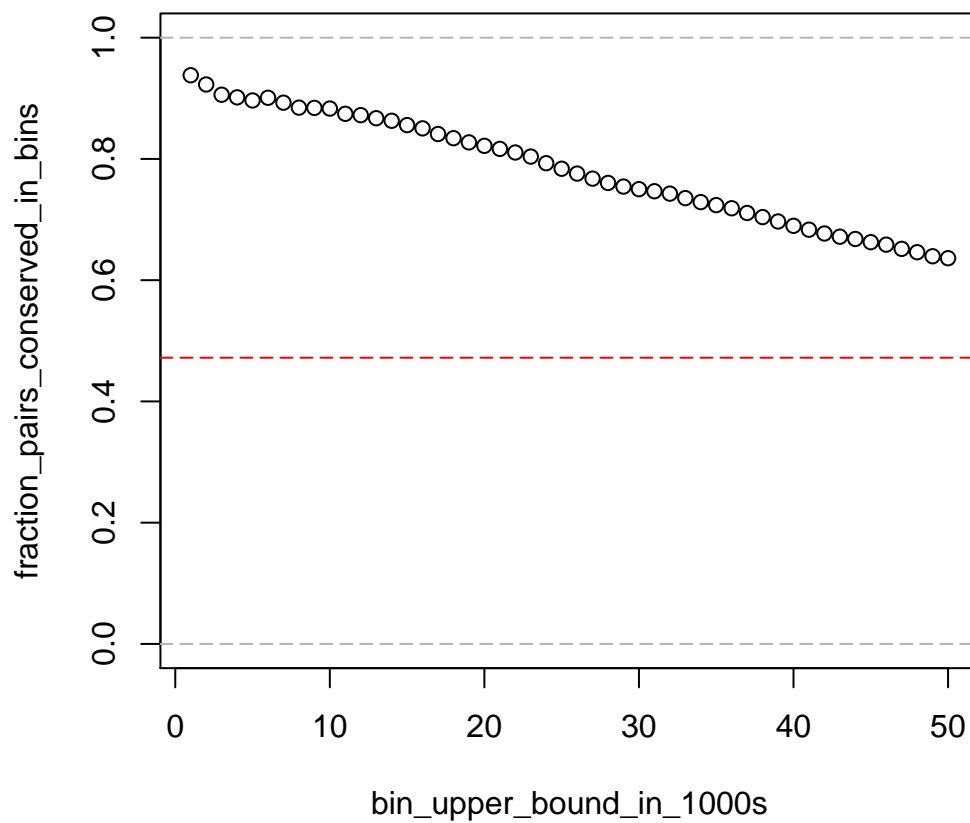

Supplement: s1 [file s1]

**Bin\_conservation\_minus\_bg\_GM0701.1\_vs\_NTS-1**  
**PD-0.056786**

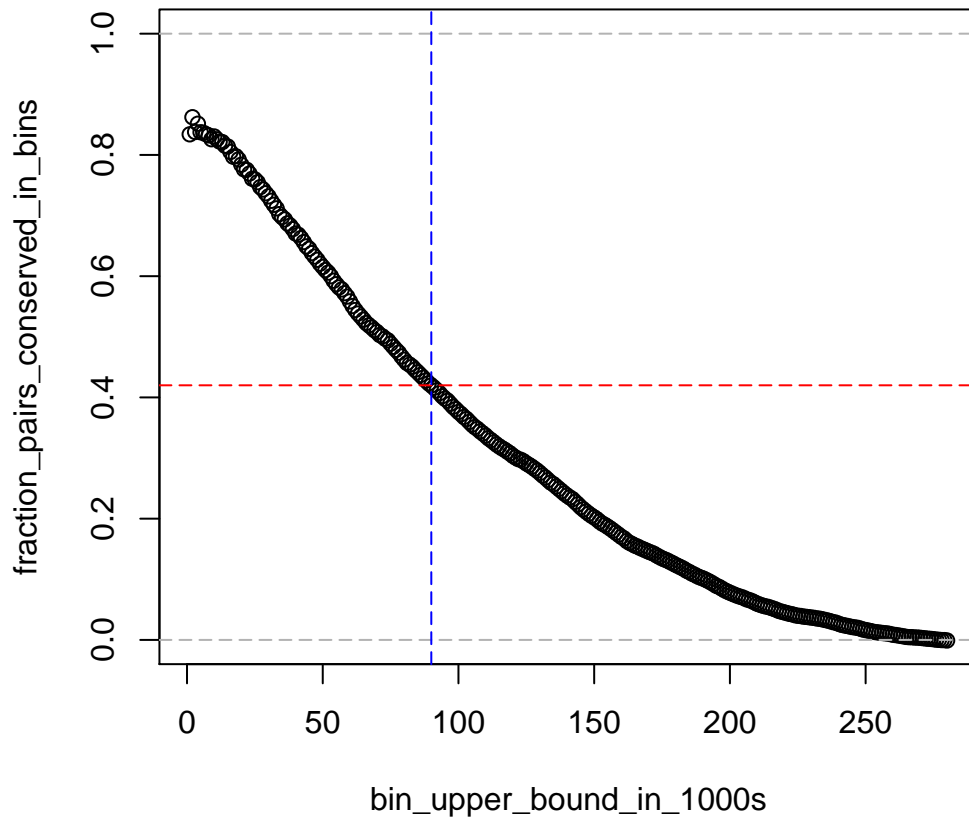

**Bin\_conservation\_minus\_bg\_GM0701.1\_vs\_NTS-1**  
**PD-0.056786**

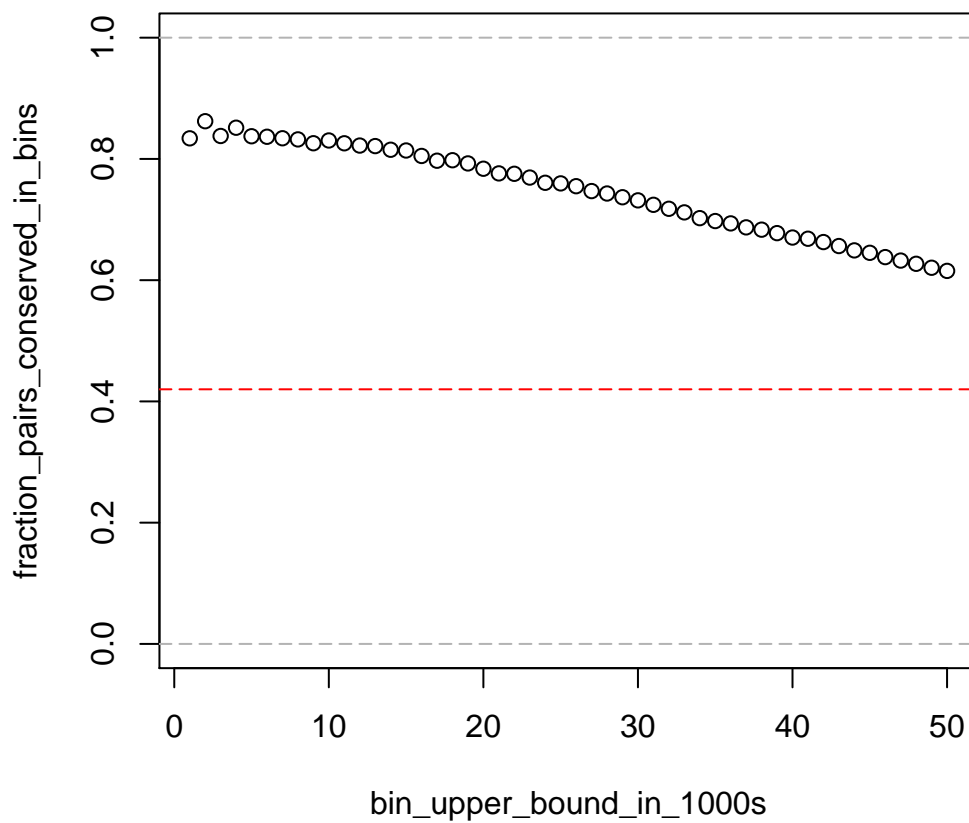

Supplement: s1 [file s1]

**Bin\_conservation\_minus\_bg\_CVB-1\_vs\_OR0704.3**  
**PD-0.476137**

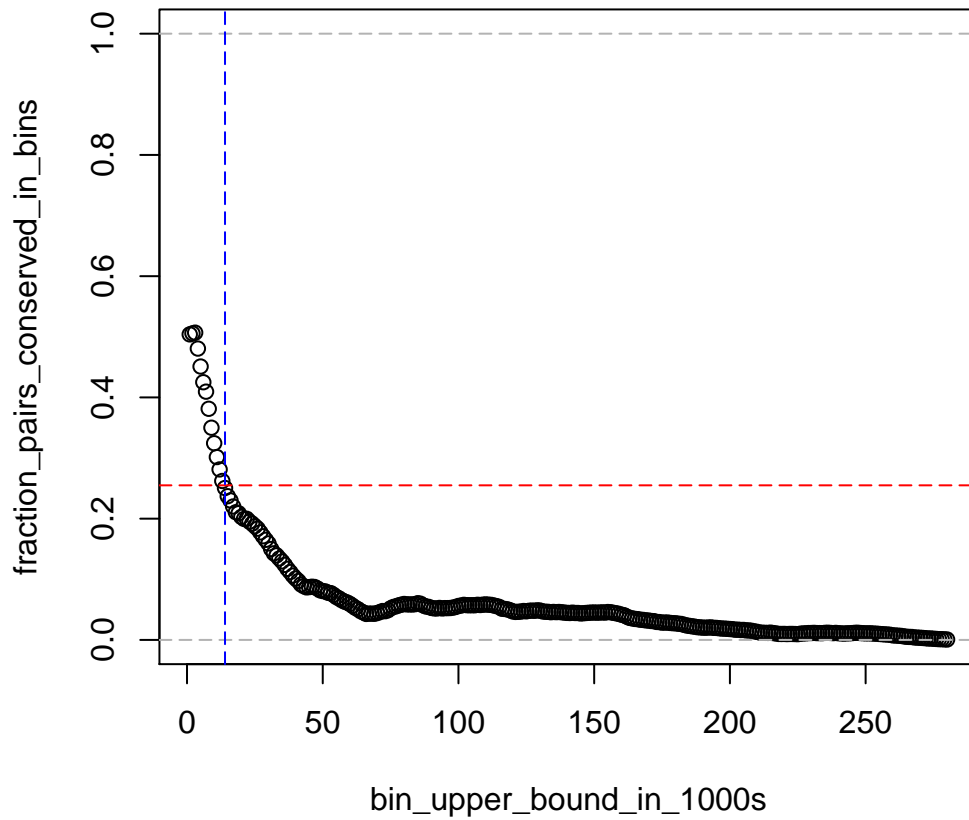

**Bin\_conservation\_minus\_bg\_CVB-1\_vs\_OR0704.3**  
**PD-0.476137**

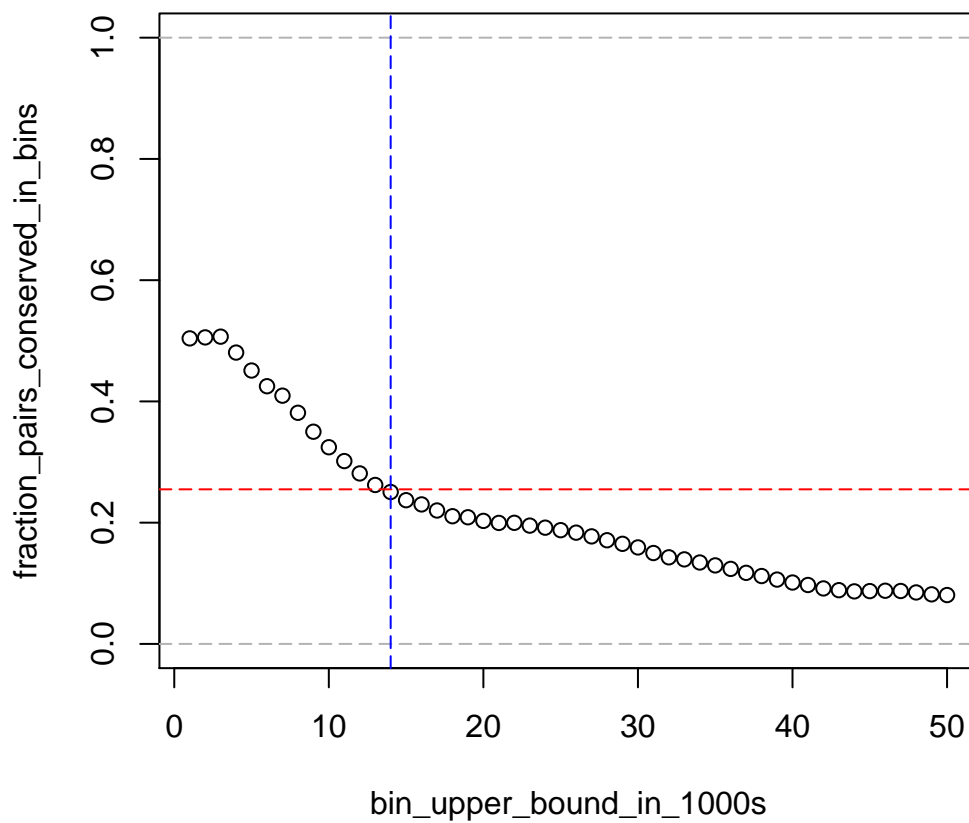

Supplement: s1 [file s1]

**Bin\_conservation\_minus\_bg\_CviKI\_vs\_MT325**  
**PD-0.650503**

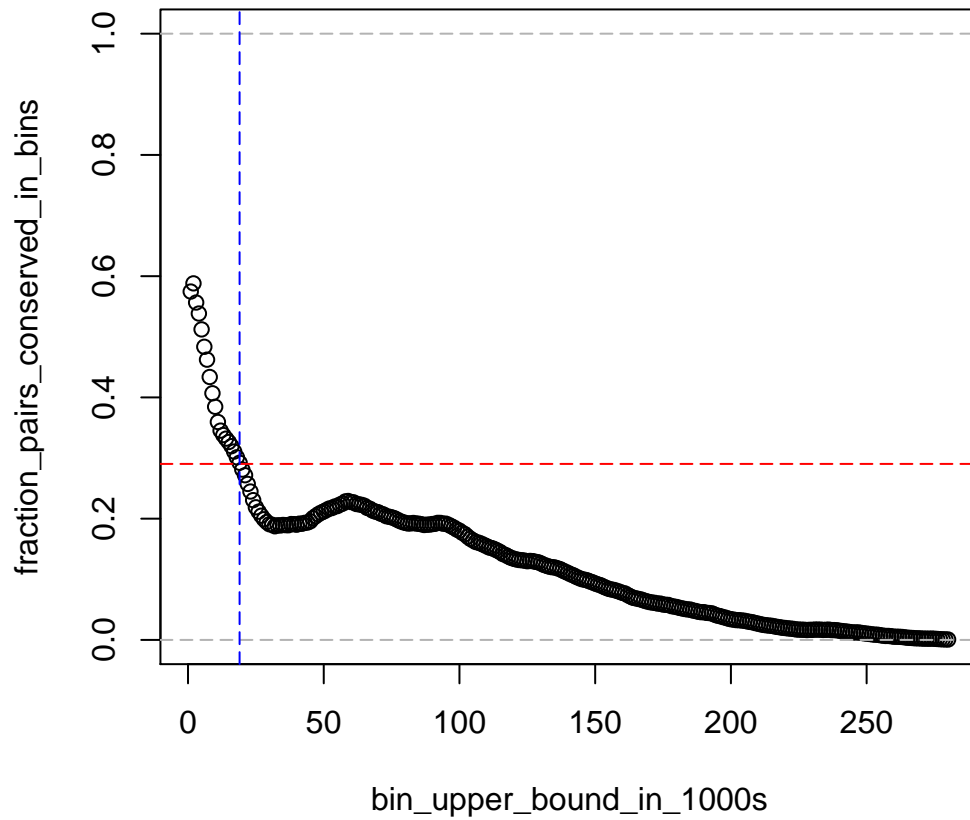

**Bin\_conservation\_minus\_bg\_CviKI\_vs\_MT325**  
**PD-0.650503**

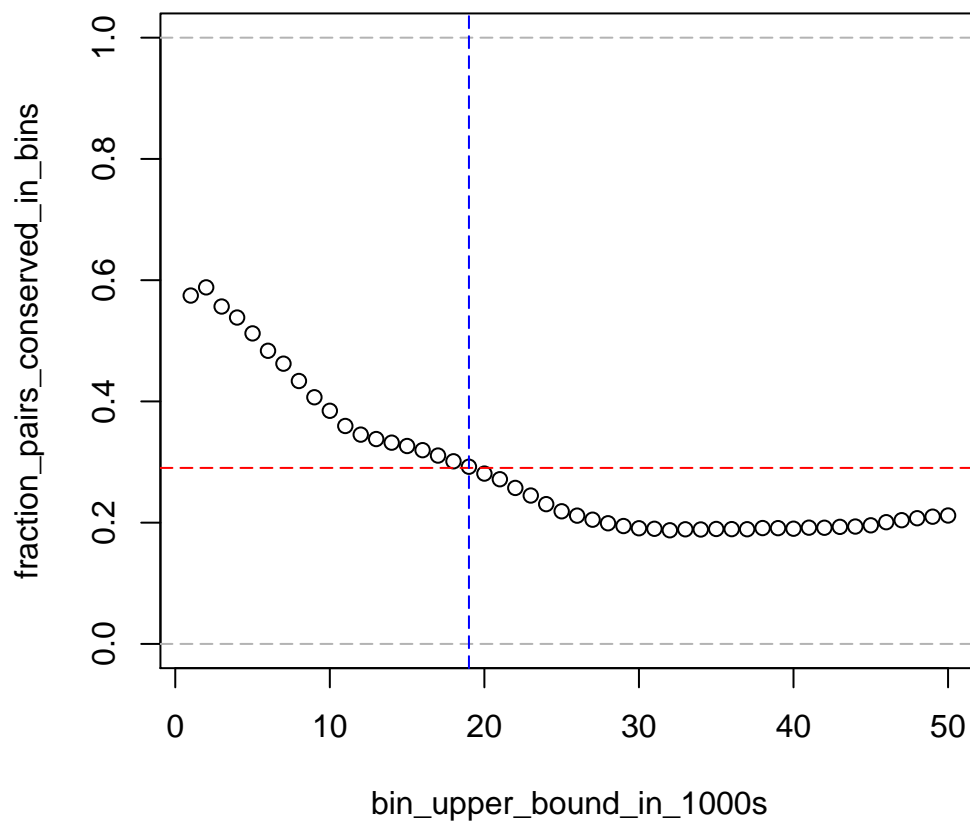

Supplement: s1 [file s1]

**Bin\_conservation\_minus\_bg\_CVB-1\_vs\_IL-5-2s1**  
**PD-0.677157**

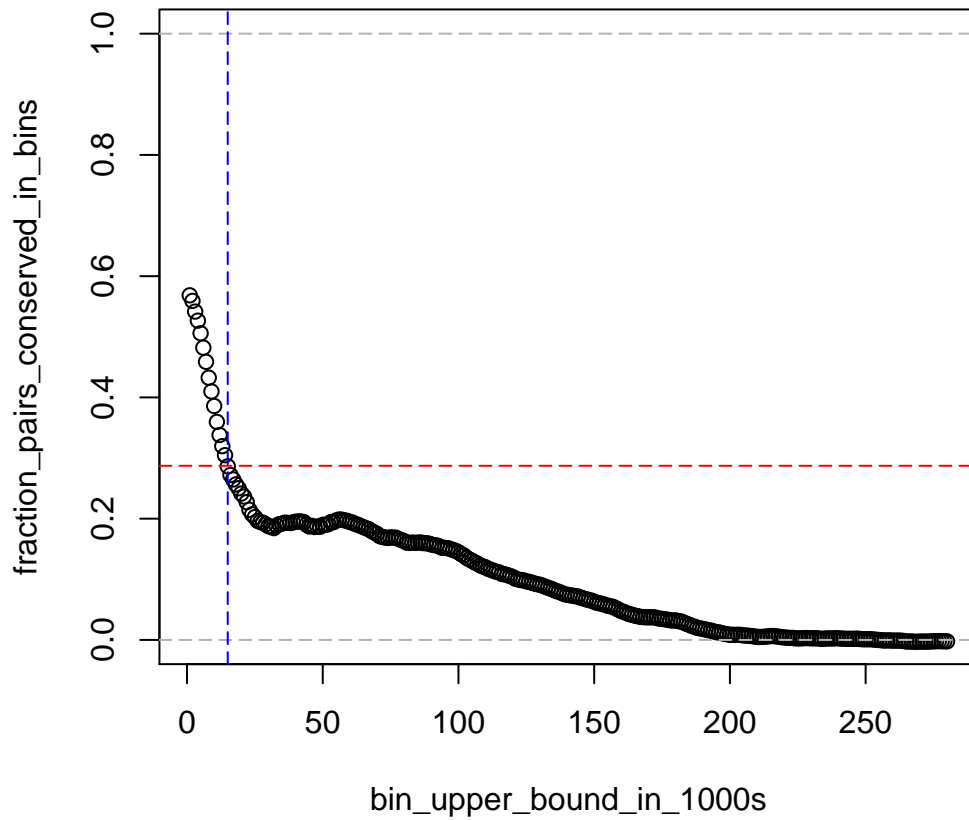

**Bin\_conservation\_minus\_bg\_CVB-1\_vs\_IL-5-2s1**  
**PD-0.677157**

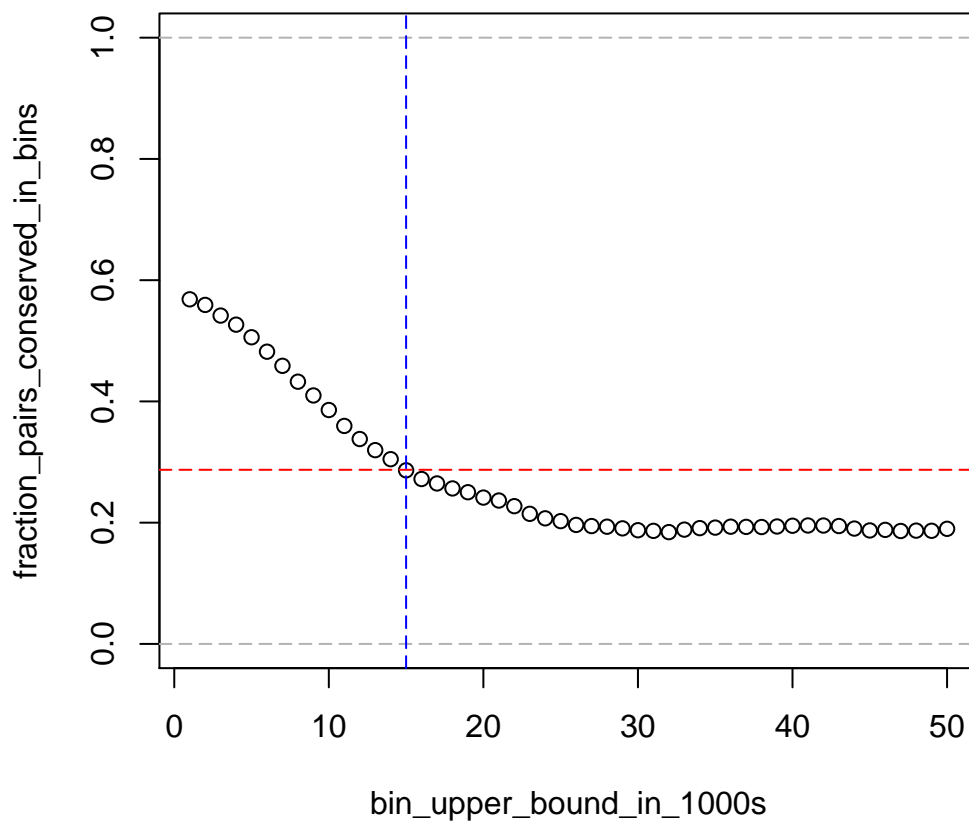

Supplement: s1 [file s1]

**Bin\_conservation\_minus\_bg\_CviKI\_vs\_NE-JV-3**  
**PD-0.694157**

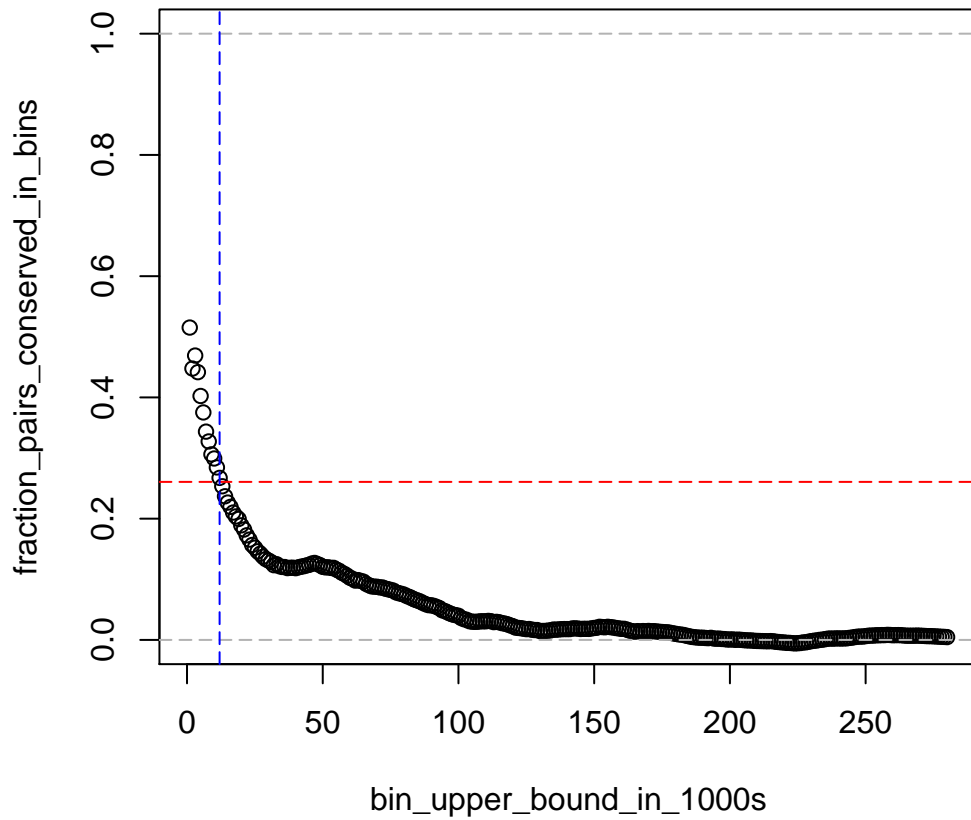

**Bin\_conservation\_minus\_bg\_CviKI\_vs\_NE-JV-3**  
**PD-0.694157**

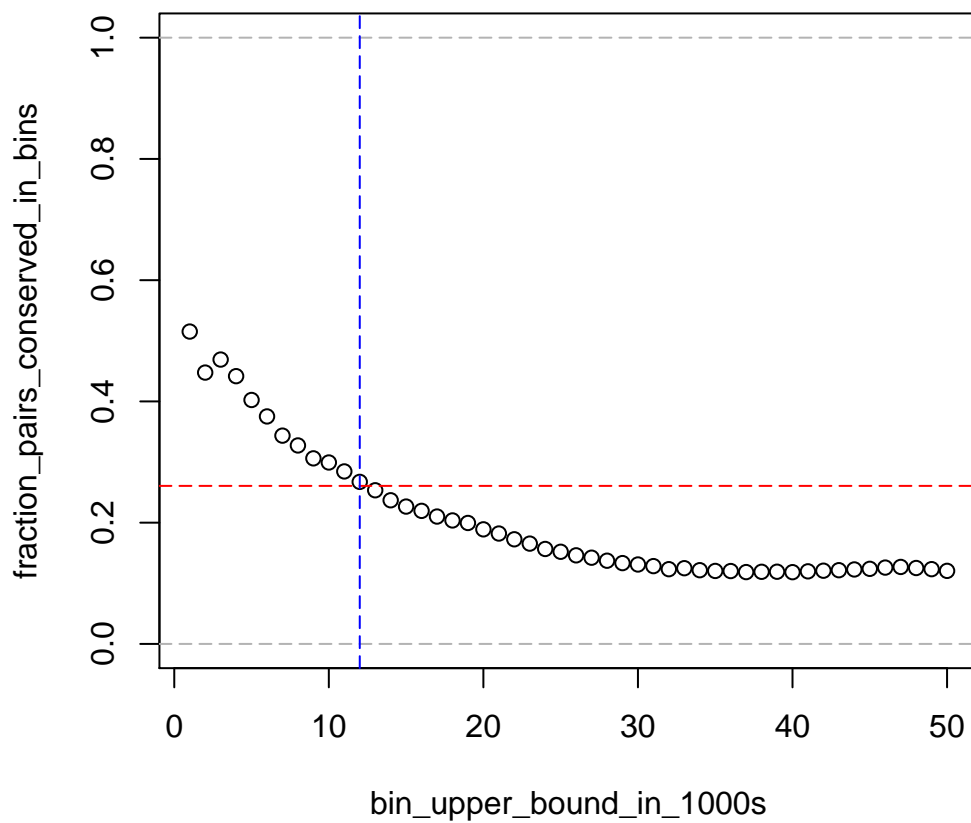

Supplement: s1 [file s1]

**Bin\_conservation\_minus\_bg\_KS1B\_vs\_MO0605SPH**  
**PD-0.696899**

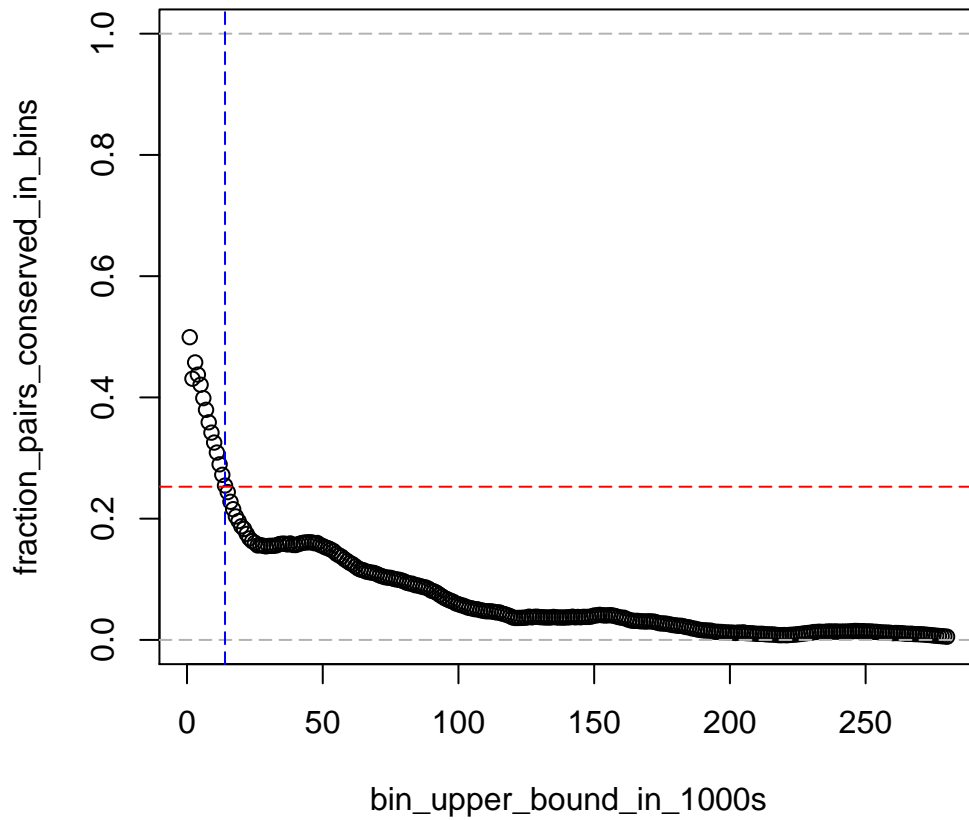

**Bin\_conservation\_minus\_bg\_KS1B\_vs\_MO0605SPH**  
**PD-0.696899**

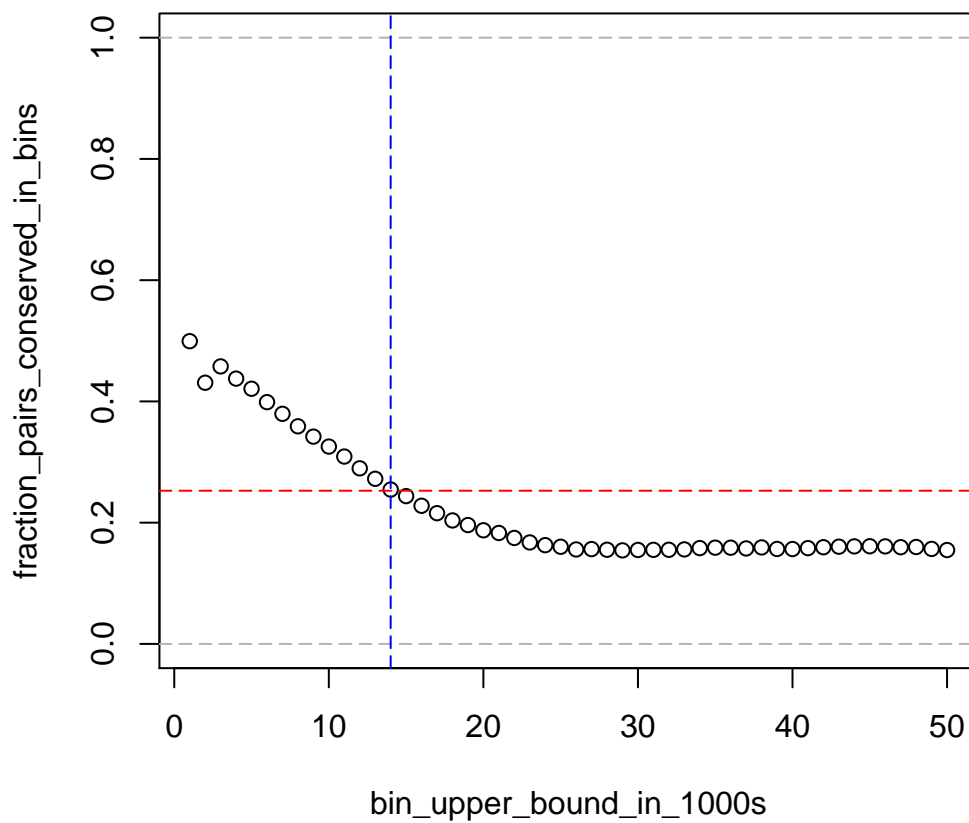

Supplement: s1 [file s1]

**Bin\_conservation\_minus\_bg\_AN69C\_vs\_Can0610SP**  
**PD-0.678453**

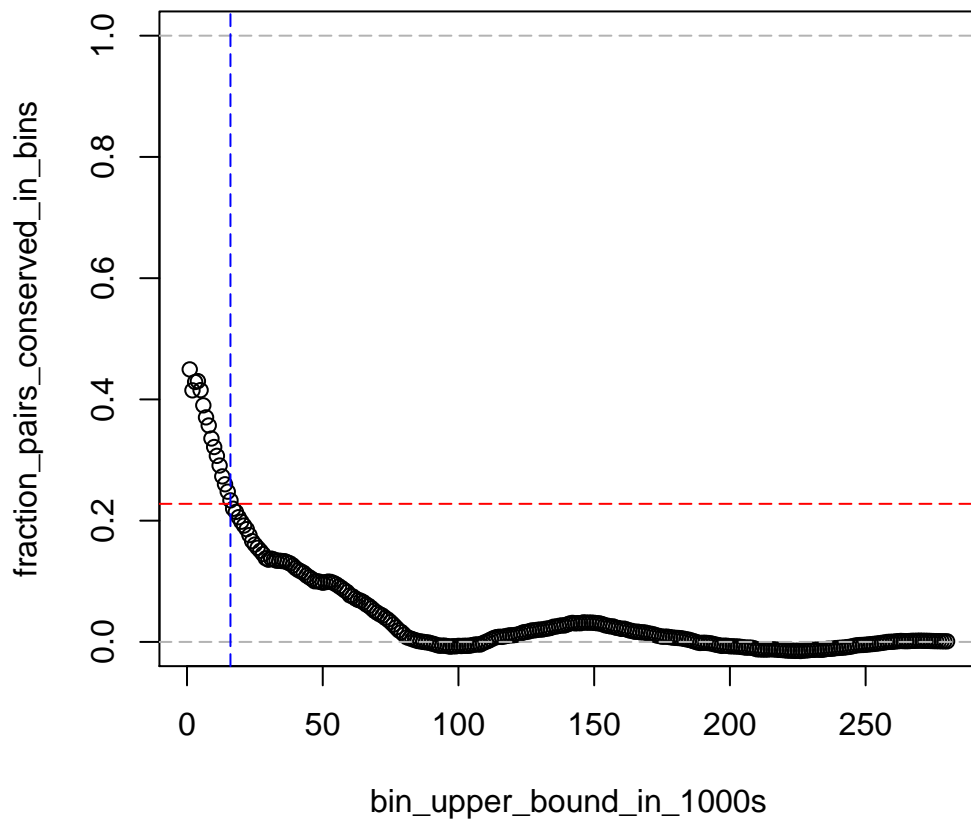

**Bin\_conservation\_minus\_bg\_AN69C\_vs\_Can0610SP**  
**PD-0.678453**

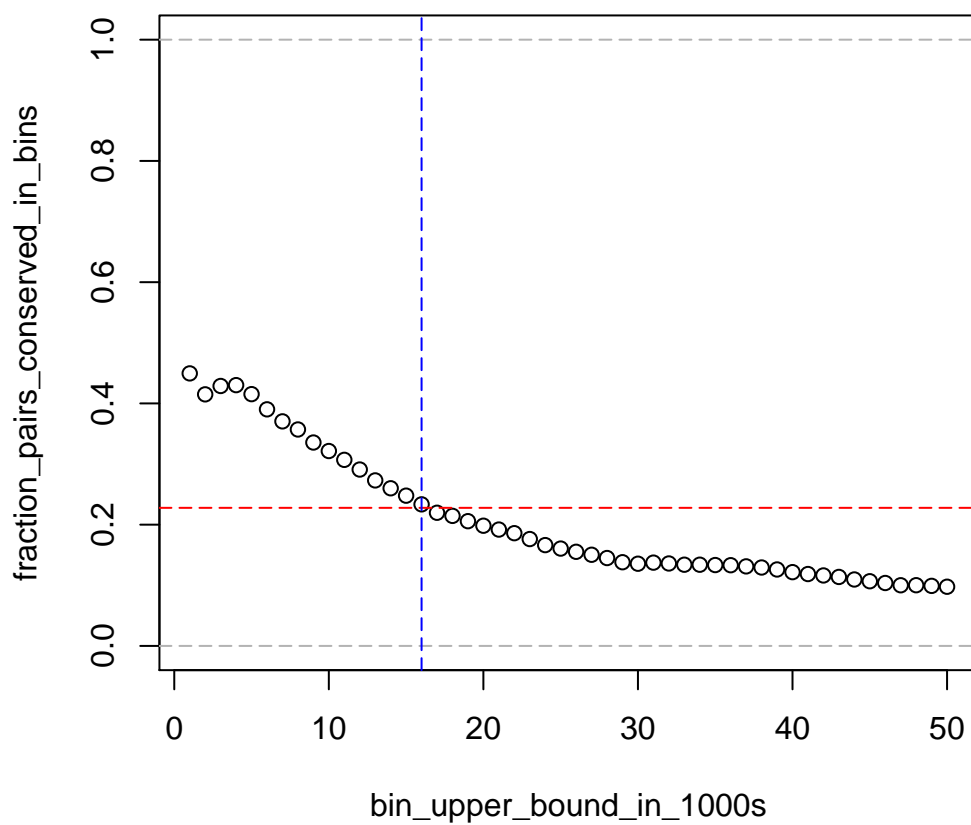

Supplement: s1 [file s1]

**Bin\_conservation\_minus\_bg\_MA-1E\_vs\_NE-JV-3**  
**PD-0.695264**

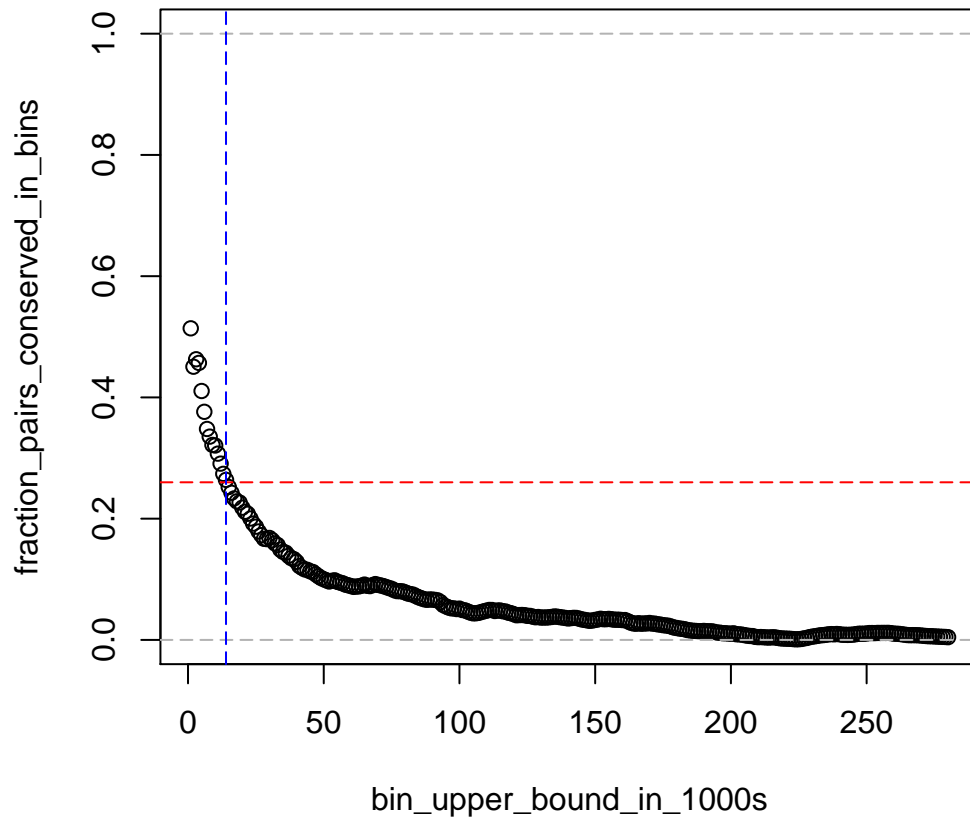

**Bin\_conservation\_minus\_bg\_MA-1E\_vs\_NE-JV-3**  
**PD-0.695264**

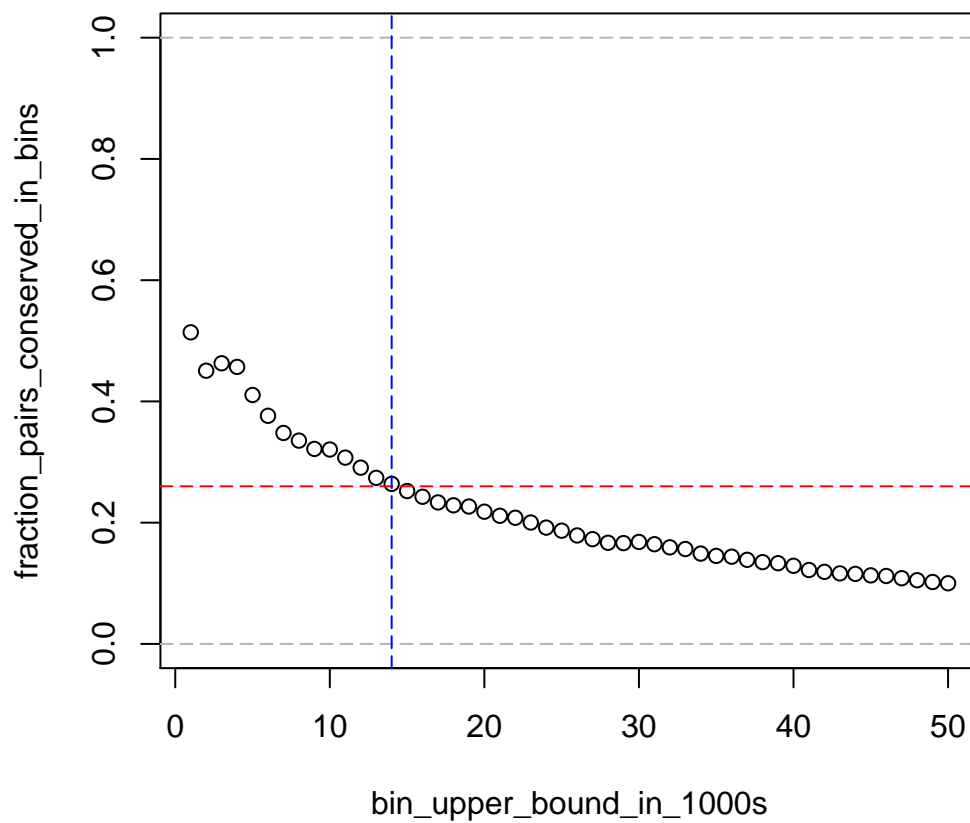

Supplement: s1 [file s1]

**Bin\_conservation\_minus\_bg\_AP110A\_vs\_Fr5L**  
**PD-0.038352**

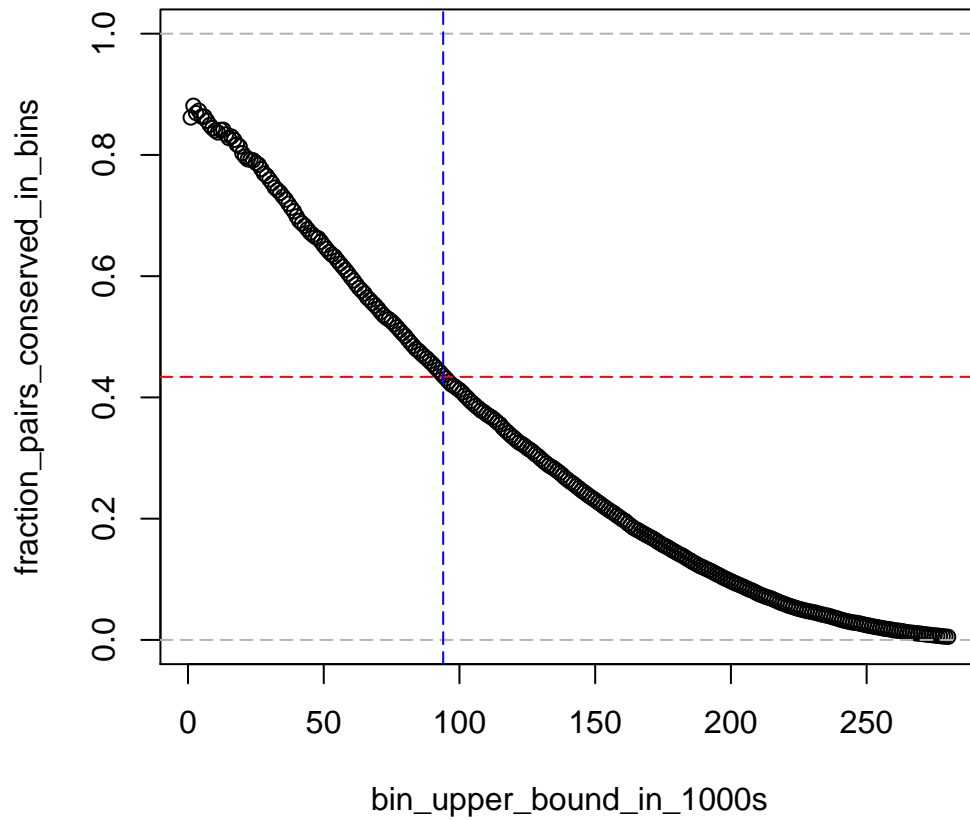

**Bin\_conservation\_minus\_bg\_AP110A\_vs\_Fr5L**  
**PD-0.038352**

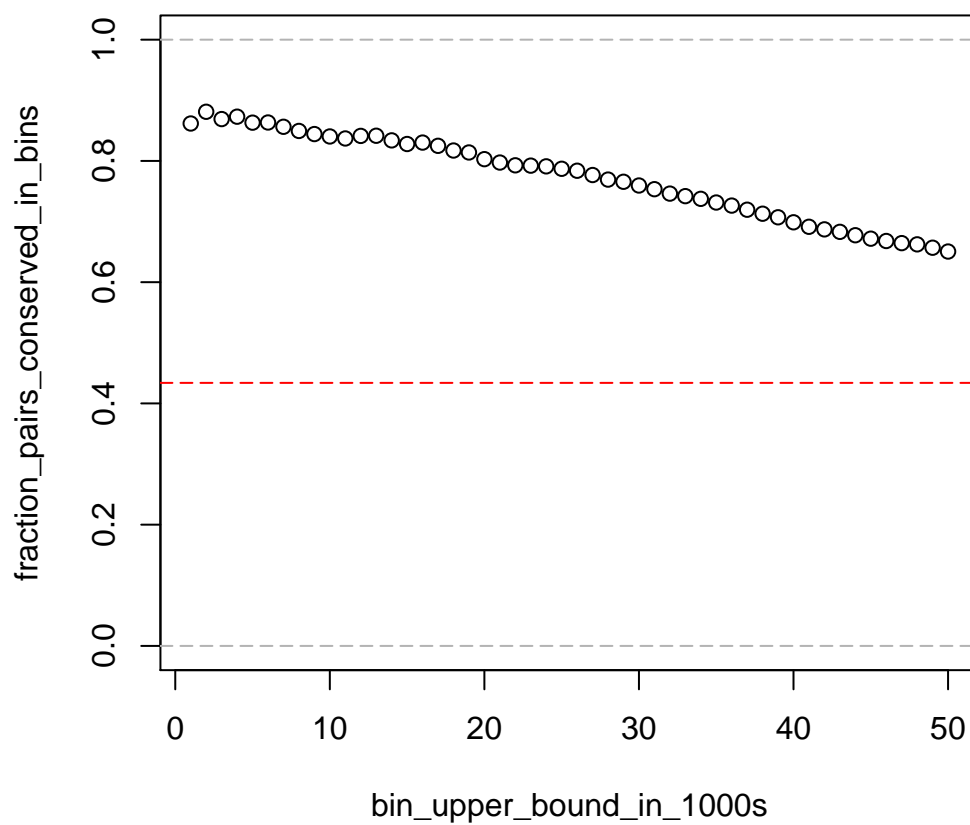

Supplement: s1 [file s1]

**Bin\_conservation\_minus\_bg\_Can18-4\_vs\_NW665.2**  
**PD-0.036915**

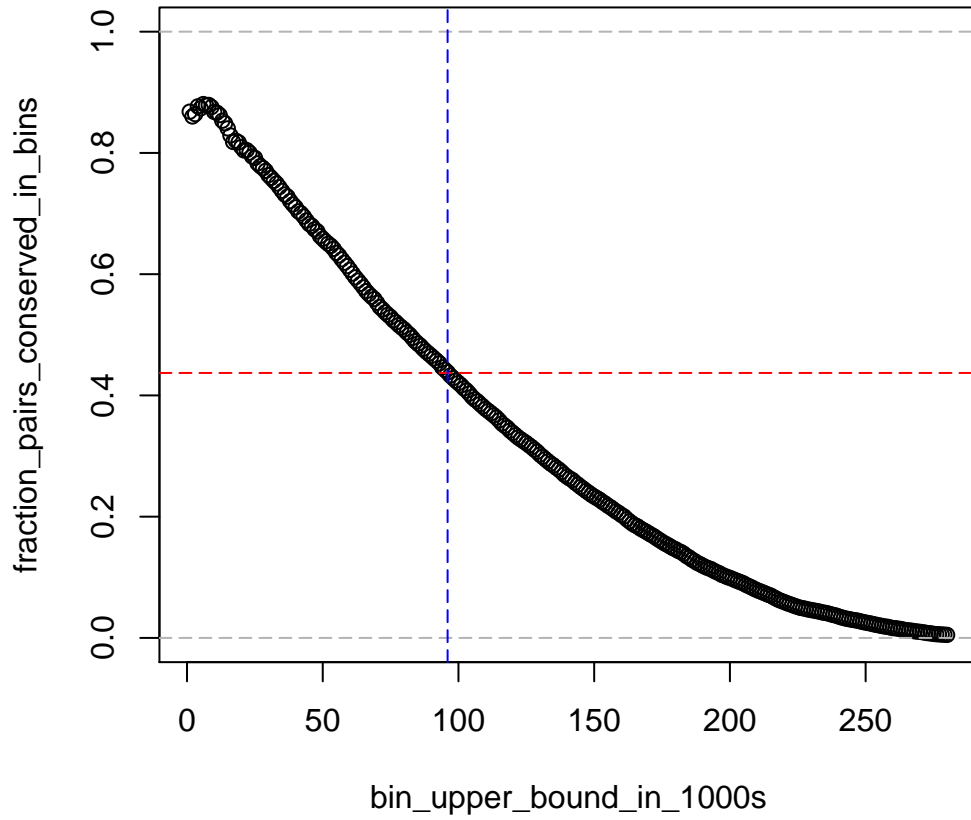

**Bin\_conservation\_minus\_bg\_Can18-4\_vs\_NW665.2**  
**PD-0.036915**

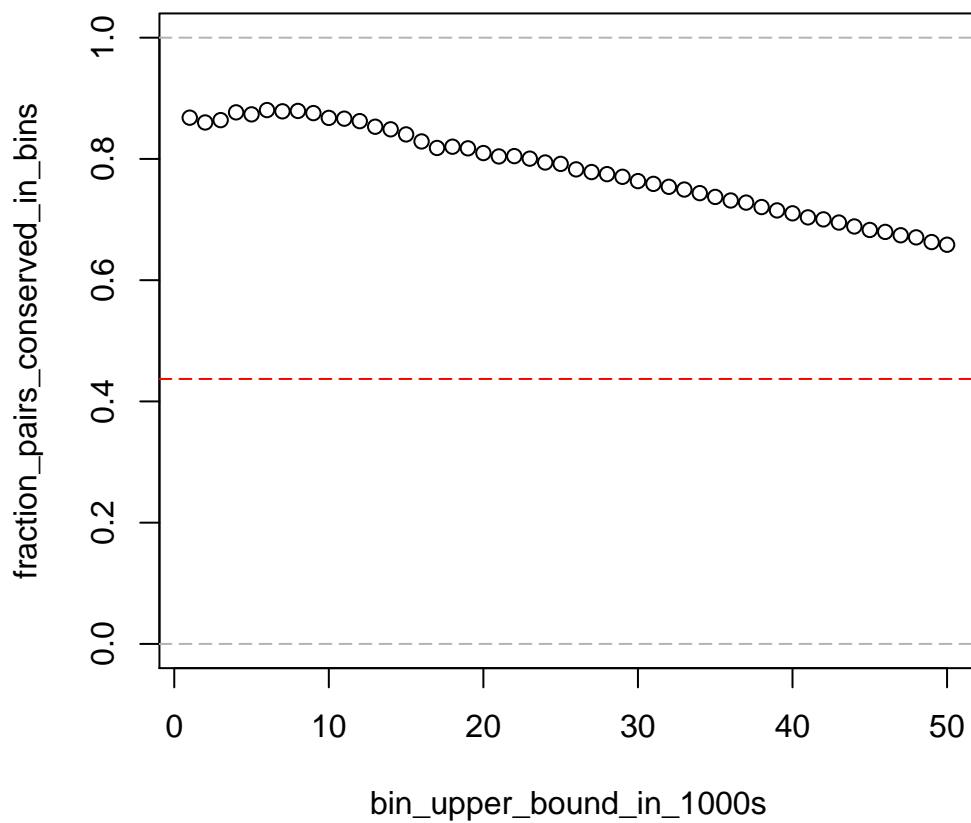

Supplement: s1 [file s1]

**Bin\_conservation\_minus\_bg\_AN69C\_vs\_GM0701.1**  
**PD-0.667922**

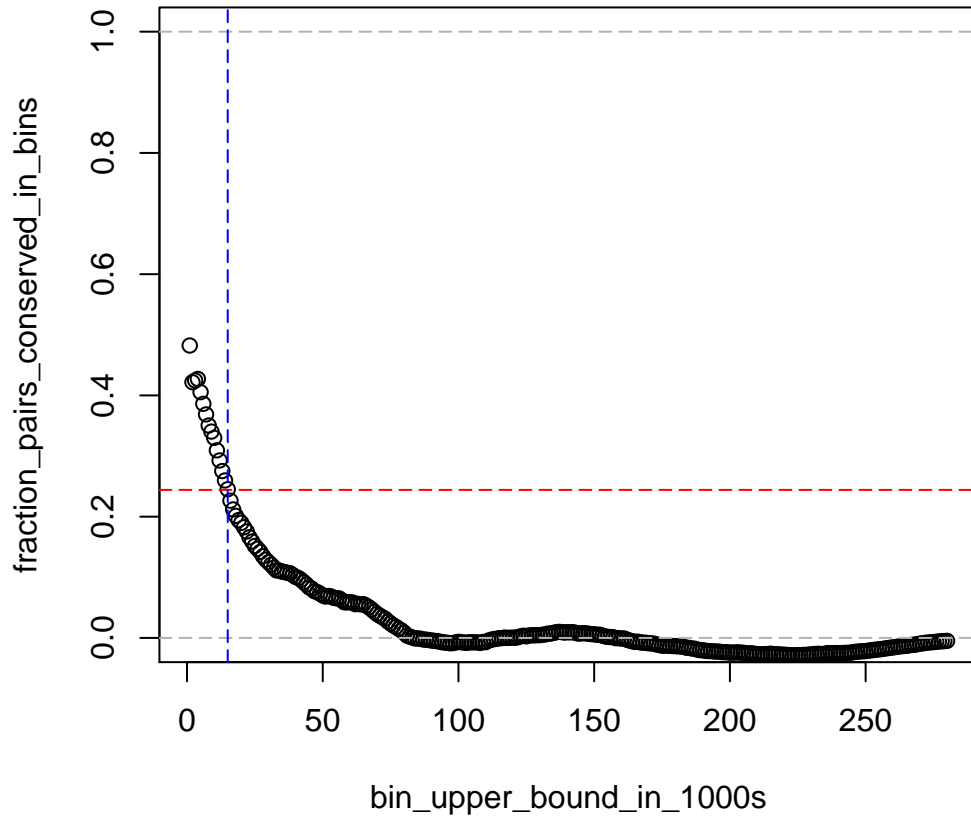

**Bin\_conservation\_minus\_bg\_AN69C\_vs\_GM0701.1**  
**PD-0.667922**

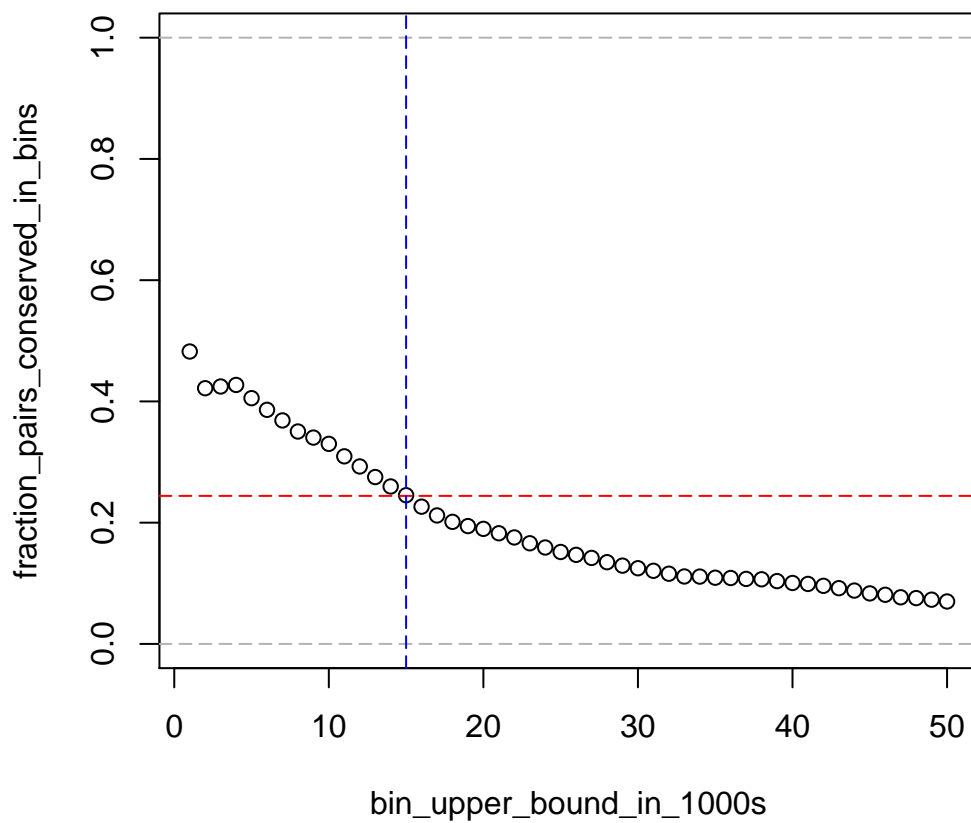

Supplement: s1 [file s1]
