# Supplementary figures and images for: Gene Gangs of the Chloroviruses: Conserved Clusters of Collinear Monocistronic Genes (part 5 of 9)
Source: MDPI journal article supplement (doi:10.3390/v10100576), 2018-10-20

**Bin\_conservation\_minus\_bg\_CVM-1\_vs\_MT325**  
**PD-0.022326**

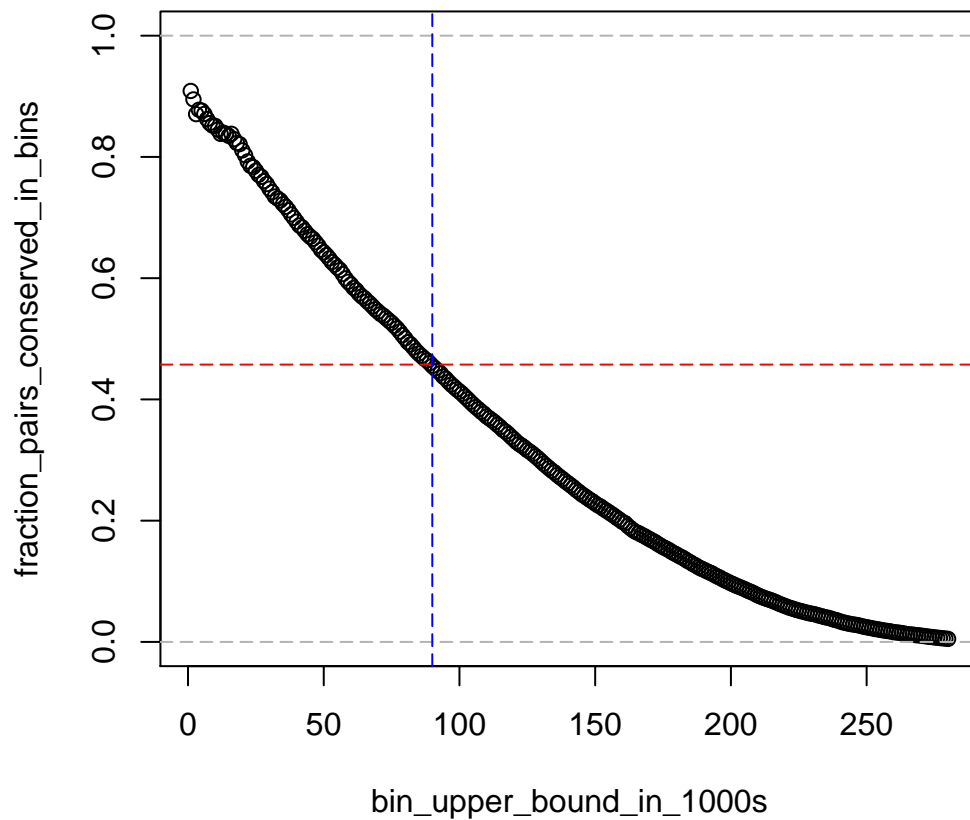

**Bin\_conservation\_minus\_bg\_CVM-1\_vs\_MT325**  
**PD-0.022326**

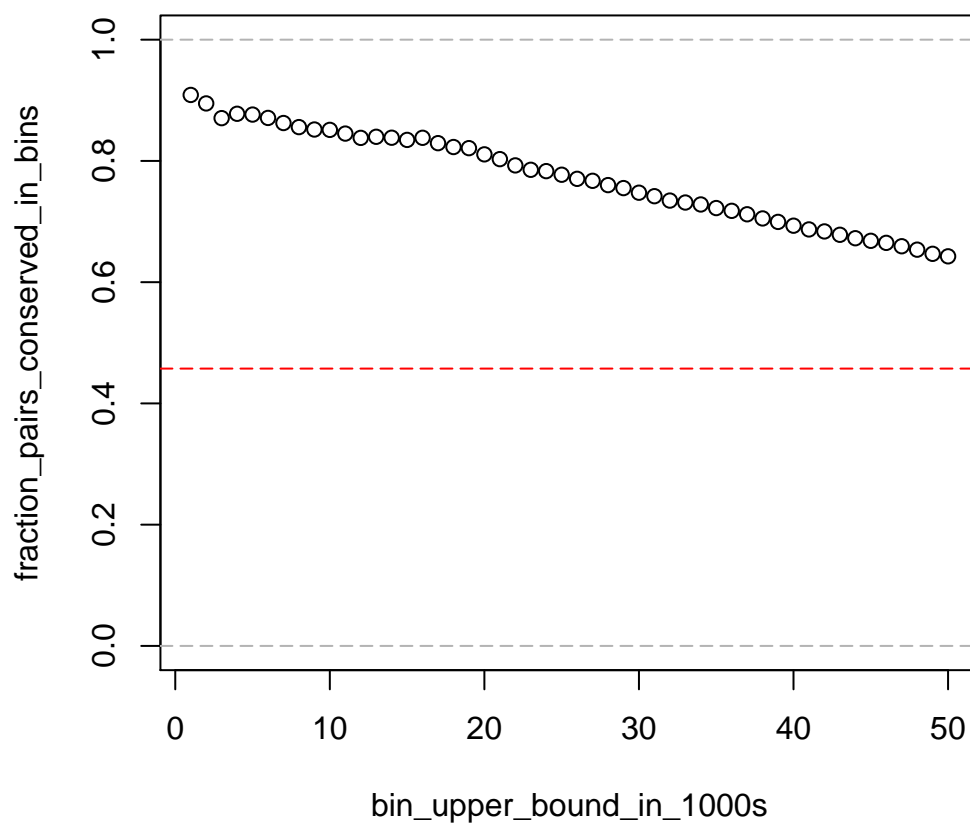

Supplement: s1 [file s1]

**Bin\_conservation\_minus\_bg\_AN69C\_vs\_NY-2B**  
**PD-0.134248**

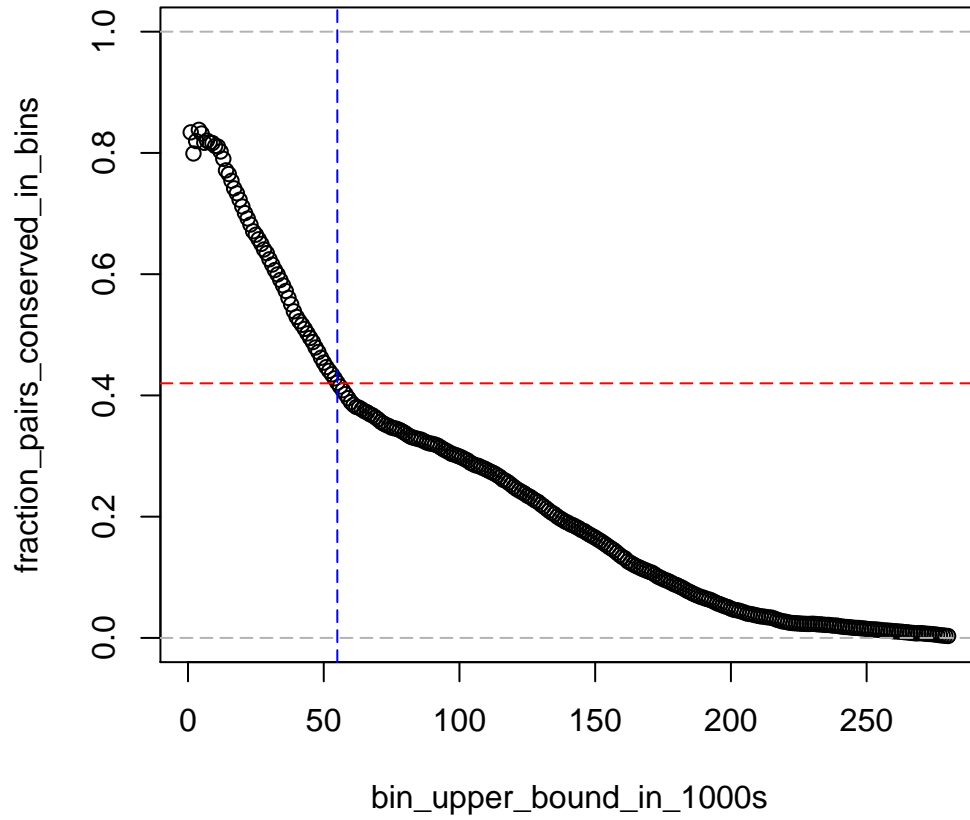

**Bin\_conservation\_minus\_bg\_AN69C\_vs\_NY-2B**  
**PD-0.134248**

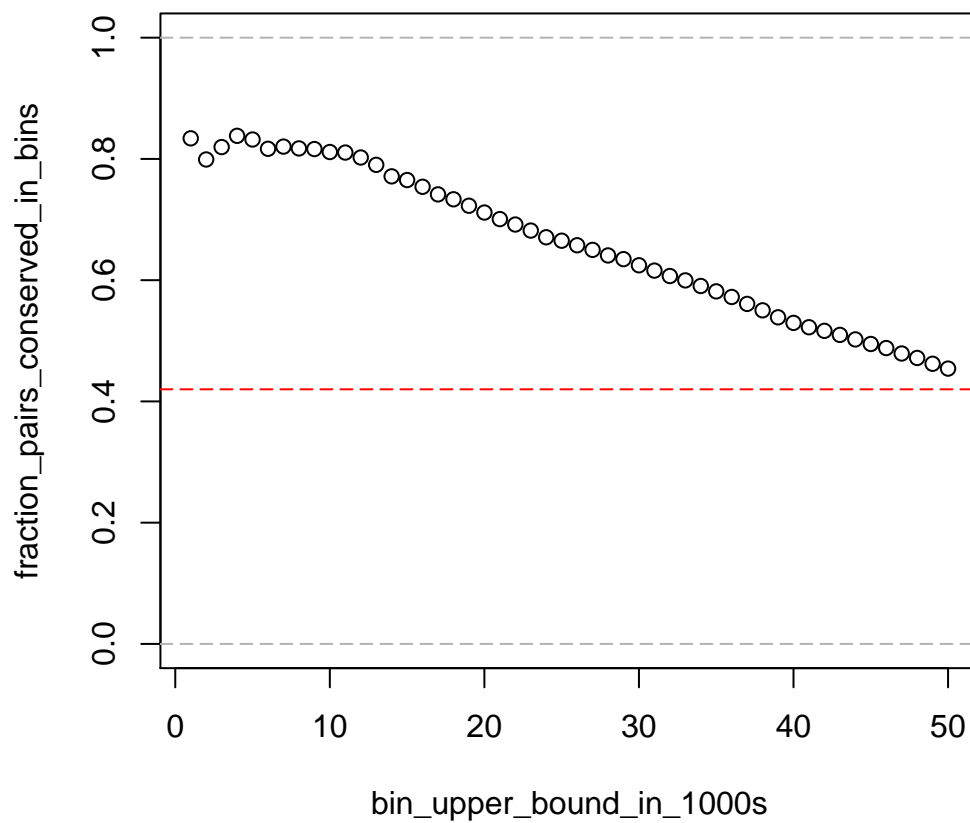

Supplement: s1 [file s1]

**Bin\_conservation\_minus\_bg\_NY2A\_vs\_OR0704.2.2**  
**PD-0.667203**

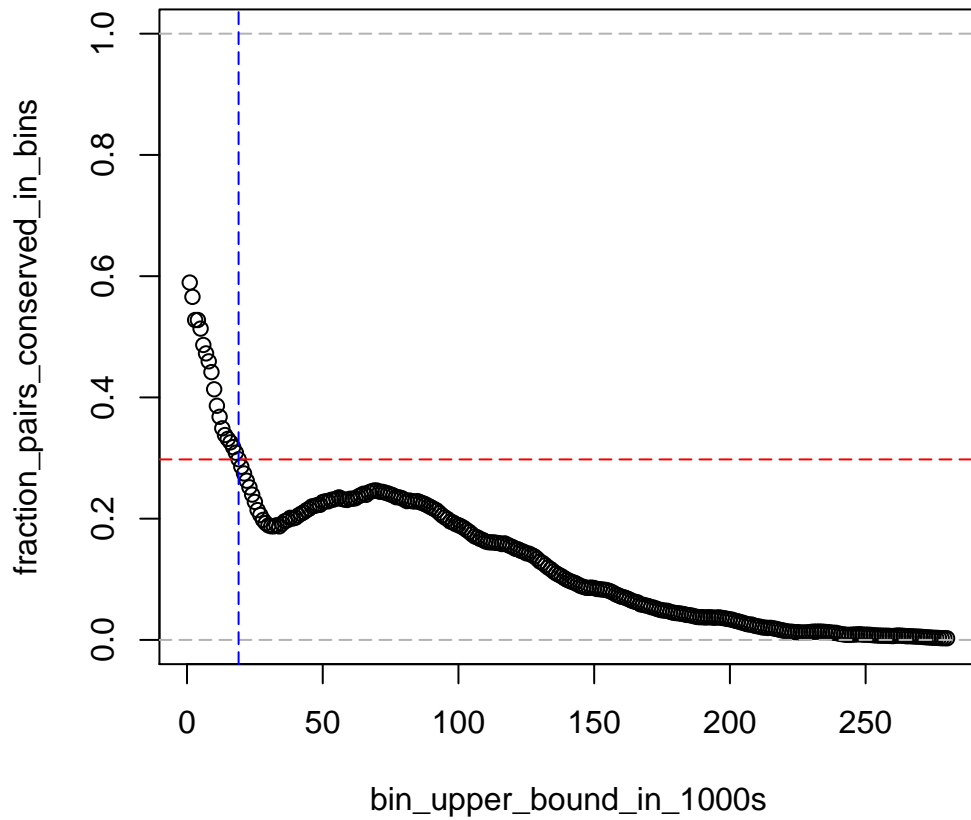

**Bin\_conservation\_minus\_bg\_NY2A\_vs\_OR0704.2.2**  
**PD-0.667203**

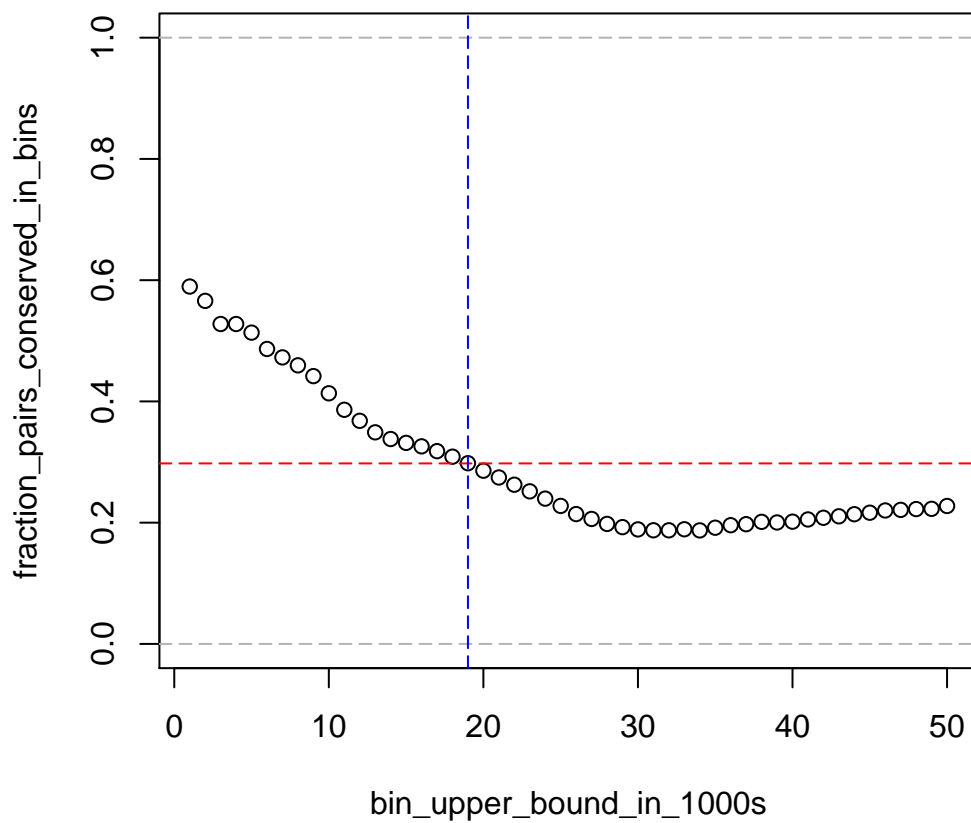

Supplement: s1 [file s1]

**Bin\_conservation\_minus\_bg\_Can18-4\_vs\_NE-JV-1**  
**PD-0.367189**

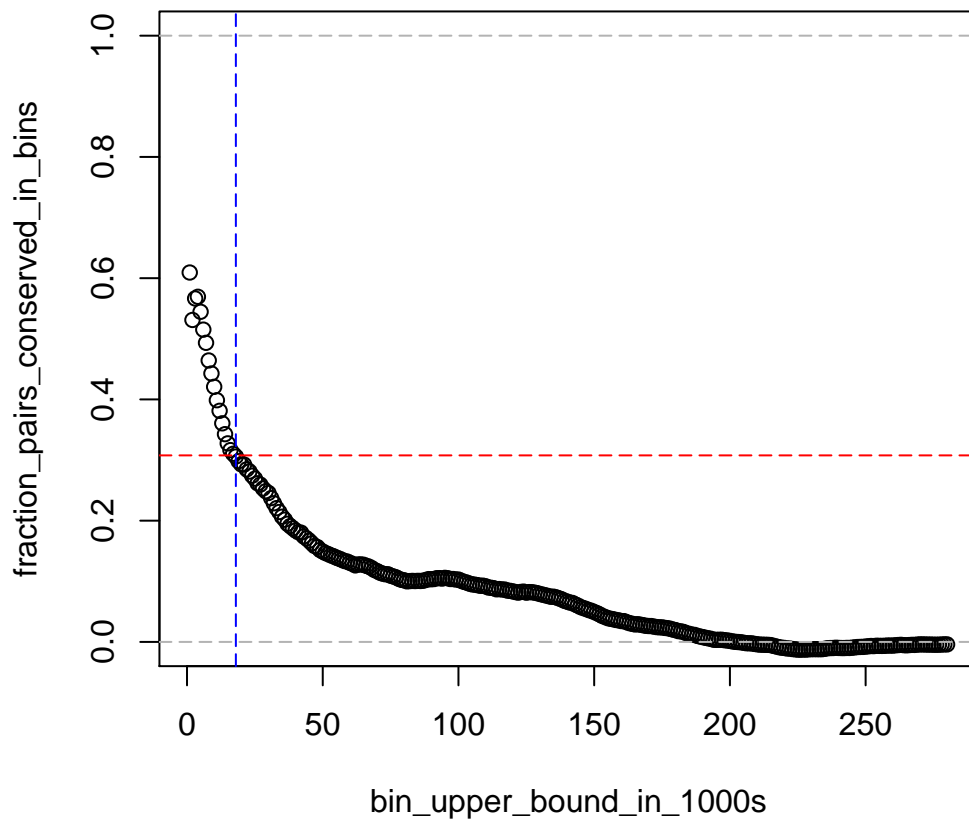

**Bin\_conservation\_minus\_bg\_Can18-4\_vs\_NE-JV-1**  
**PD-0.367189**

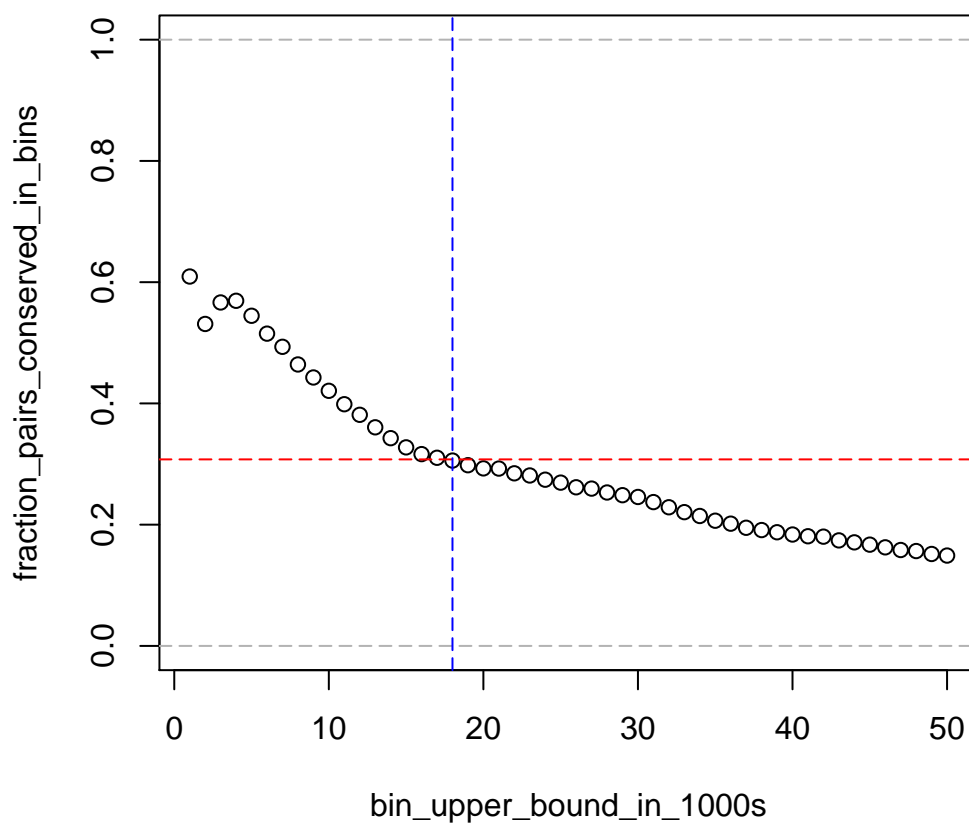

Supplement: s1 [file s1]

**Bin\_conservation\_minus\_bg\_Canal-1\_vs\_PBCV1**  
**PD-0.677363**

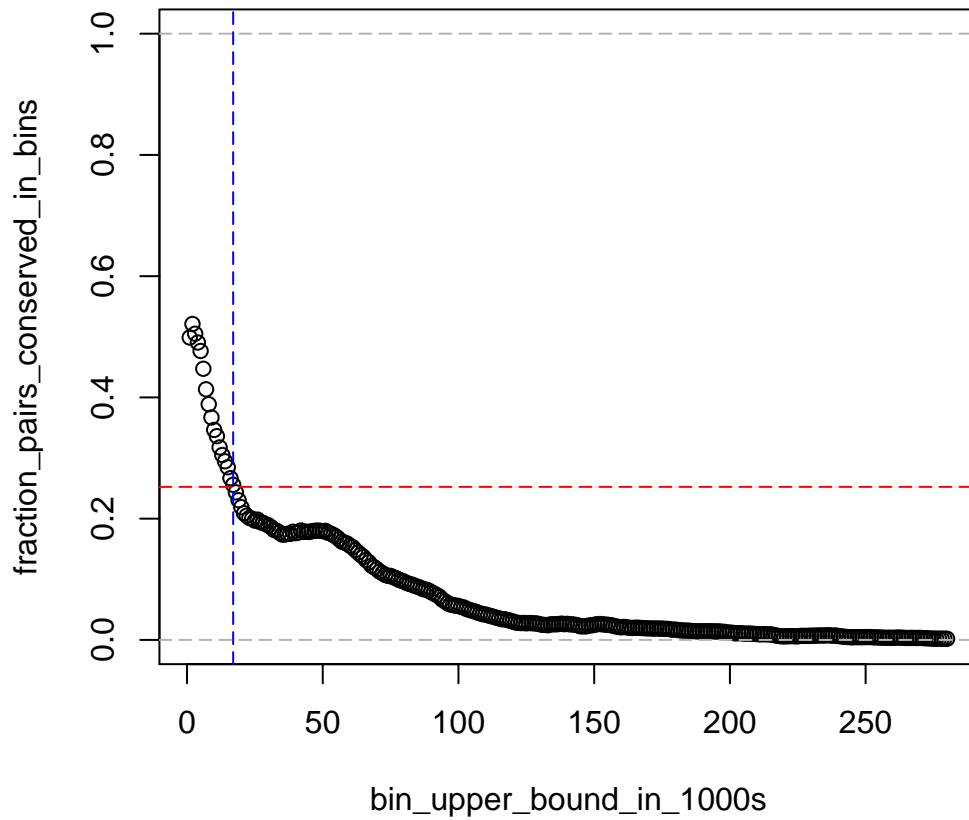

**Bin\_conservation\_minus\_bg\_Canal-1\_vs\_PBCV1**  
**PD-0.677363**

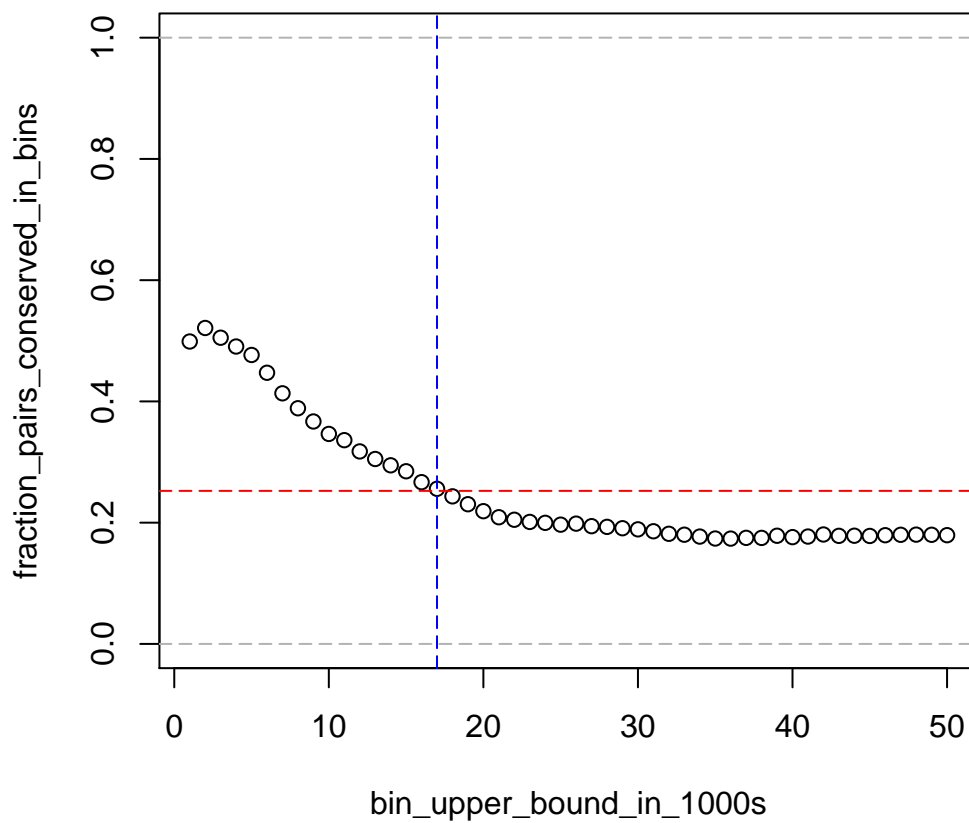

Supplement: s1 [file s1]

**Bin\_conservation\_minus\_bg\_CVG-1\_vs\_NYs-1**  
**PD-0.662399**

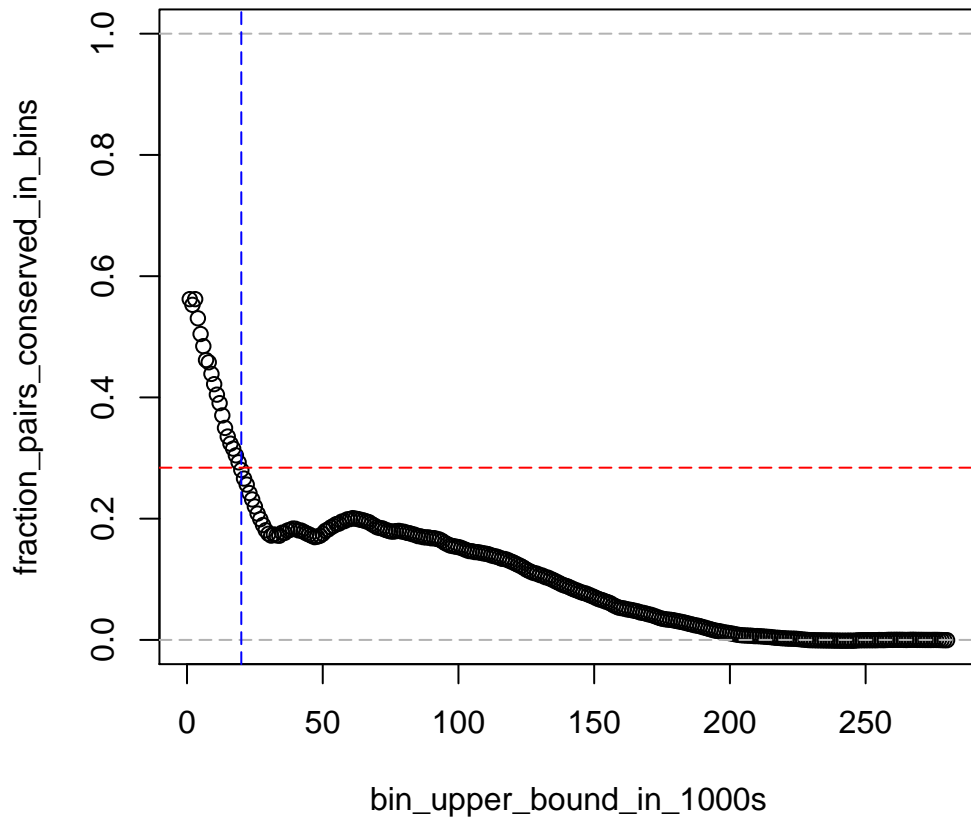

**Bin\_conservation\_minus\_bg\_CVG-1\_vs\_NYs-1**  
**PD-0.662399**

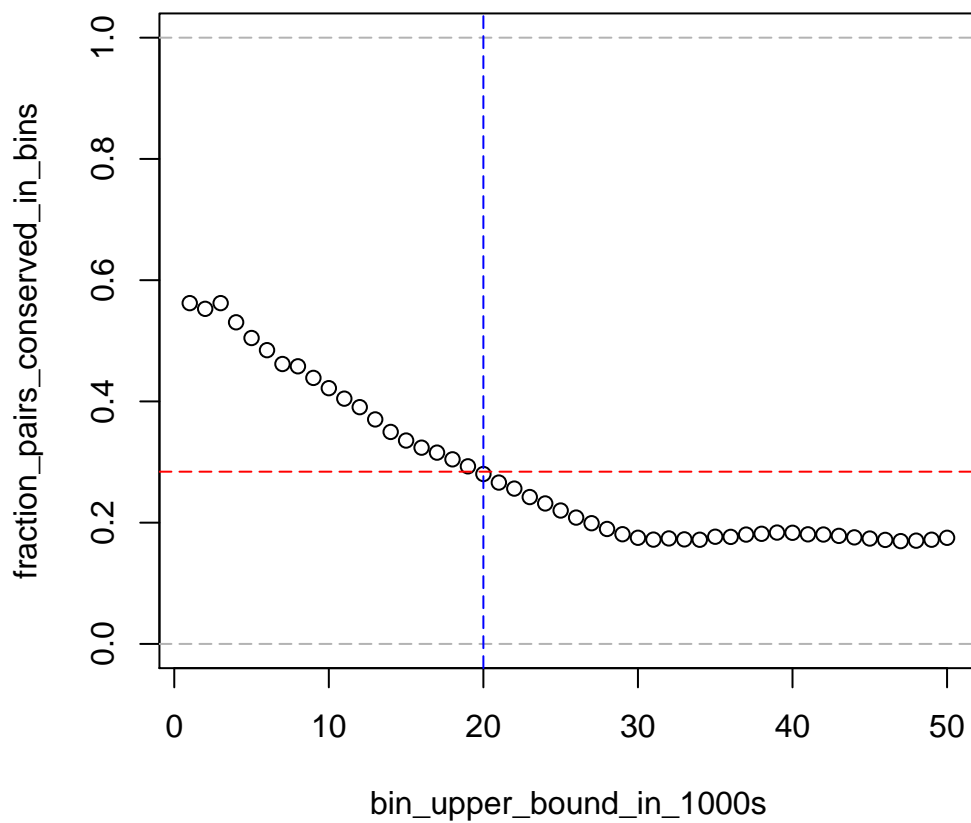

Supplement: s1 [file s1]

**Bin\_conservation\_minus\_bg\_AP110A\_vs\_NYs-1**  
**PD-0.663117**

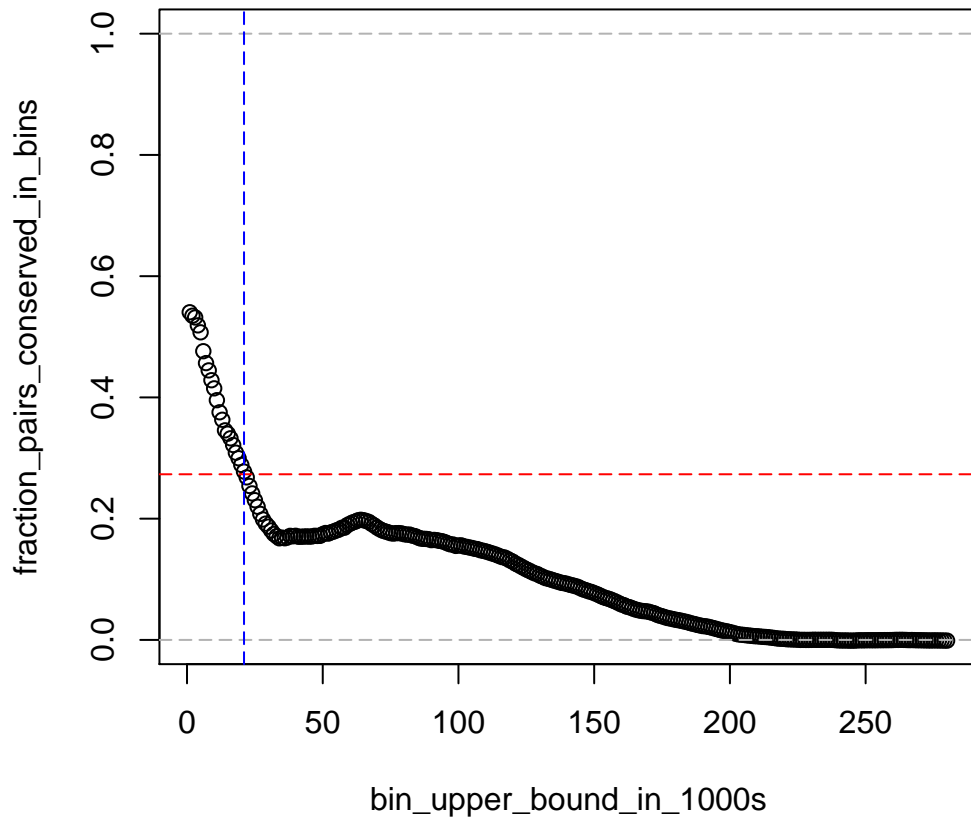

**Bin\_conservation\_minus\_bg\_AP110A\_vs\_NYs-1**  
**PD-0.663117**

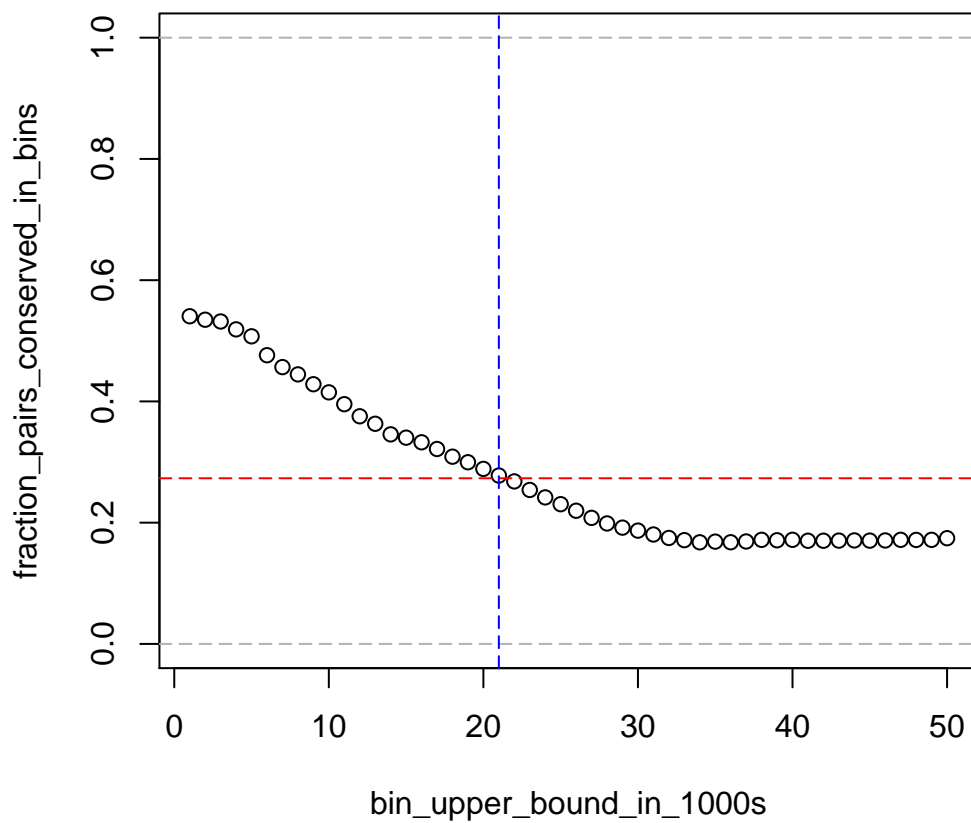

Supplement: s1 [file s1]

**Bin\_conservation\_minus\_bg\_NE-JV-2\_vs\_NY-2B**  
**PD-0.7053**

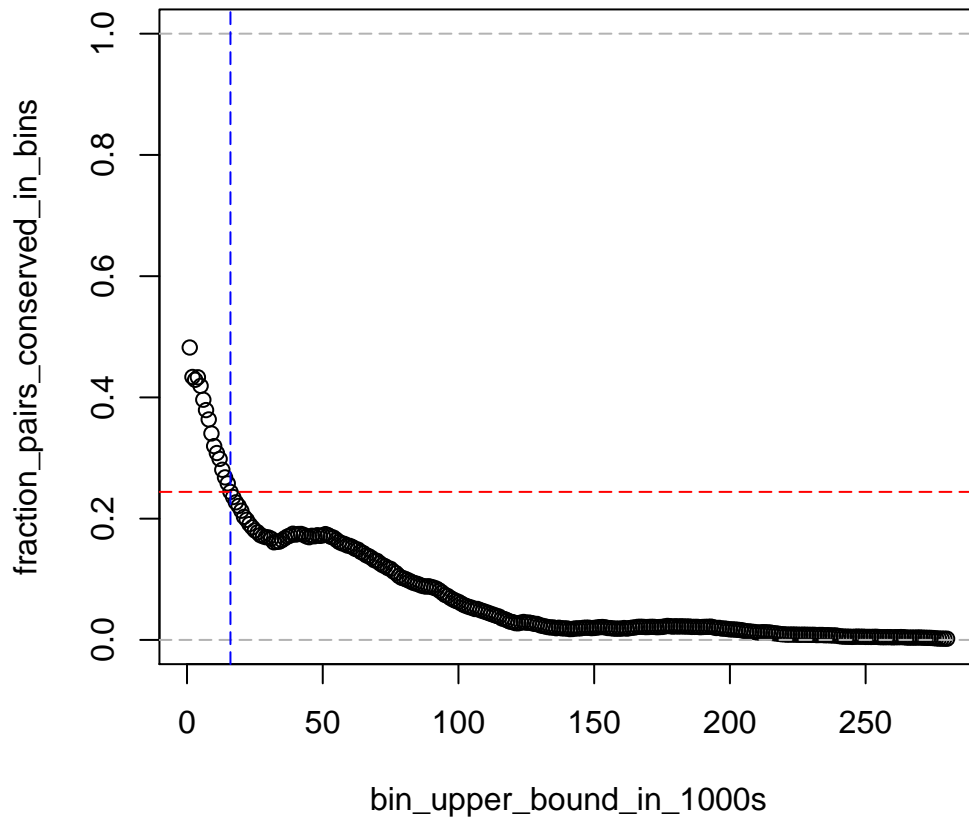

**Bin\_conservation\_minus\_bg\_NE-JV-2\_vs\_NY-2B**  
**PD-0.7053**

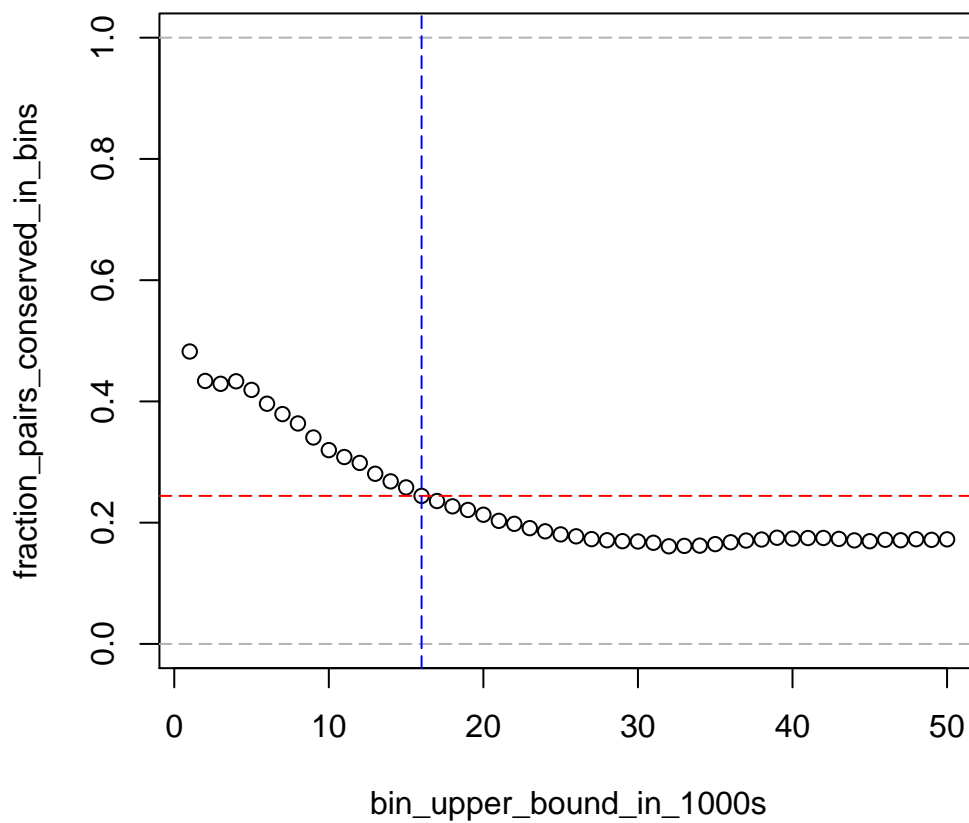

Supplement: s1 [file s1]

**Bin\_conservation\_minus\_bg\_CVA-1\_vs\_NE-JV-4**  
**PD-0.637175**

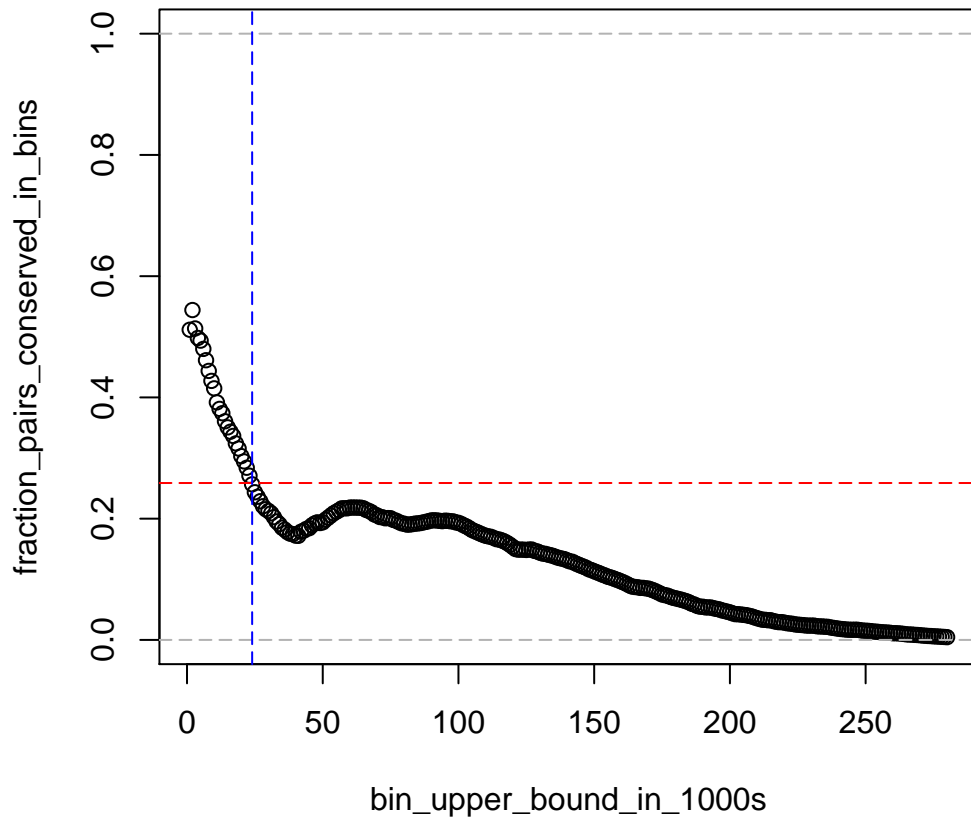

**Bin\_conservation\_minus\_bg\_CVA-1\_vs\_NE-JV-4**  
**PD-0.637175**

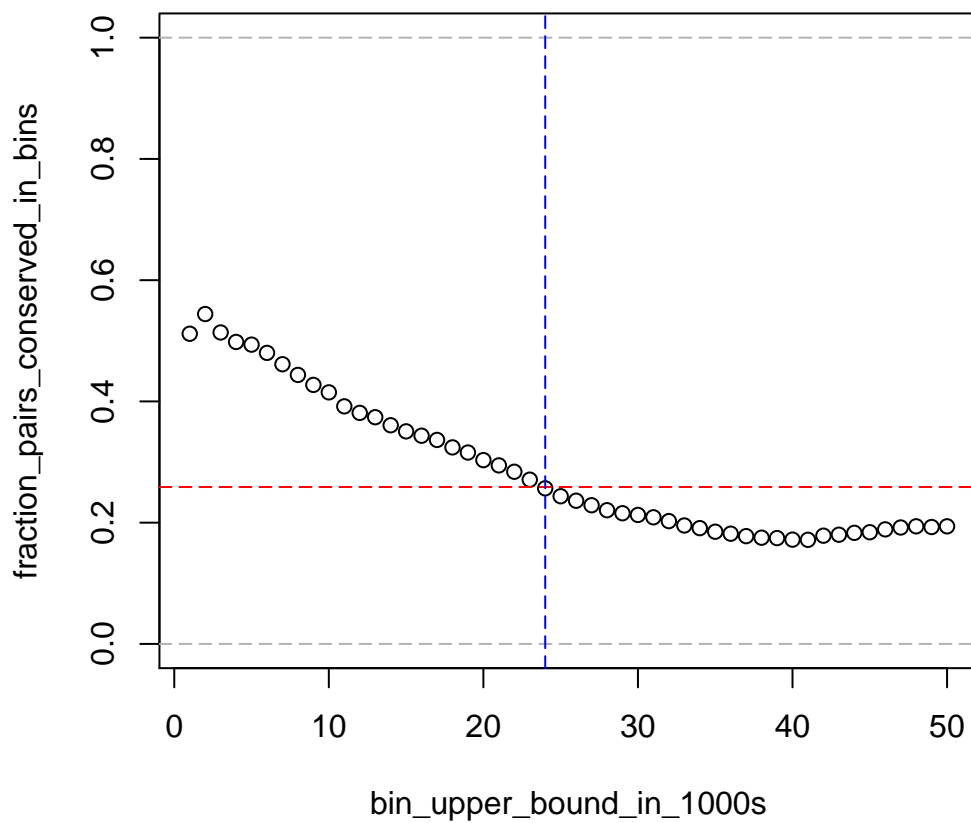

Supplement: s1 [file s1]

**Bin\_conservation\_minus\_bg\_GM0701.1\_vs\_OR0704.2.2**  
**PD-0.449101**

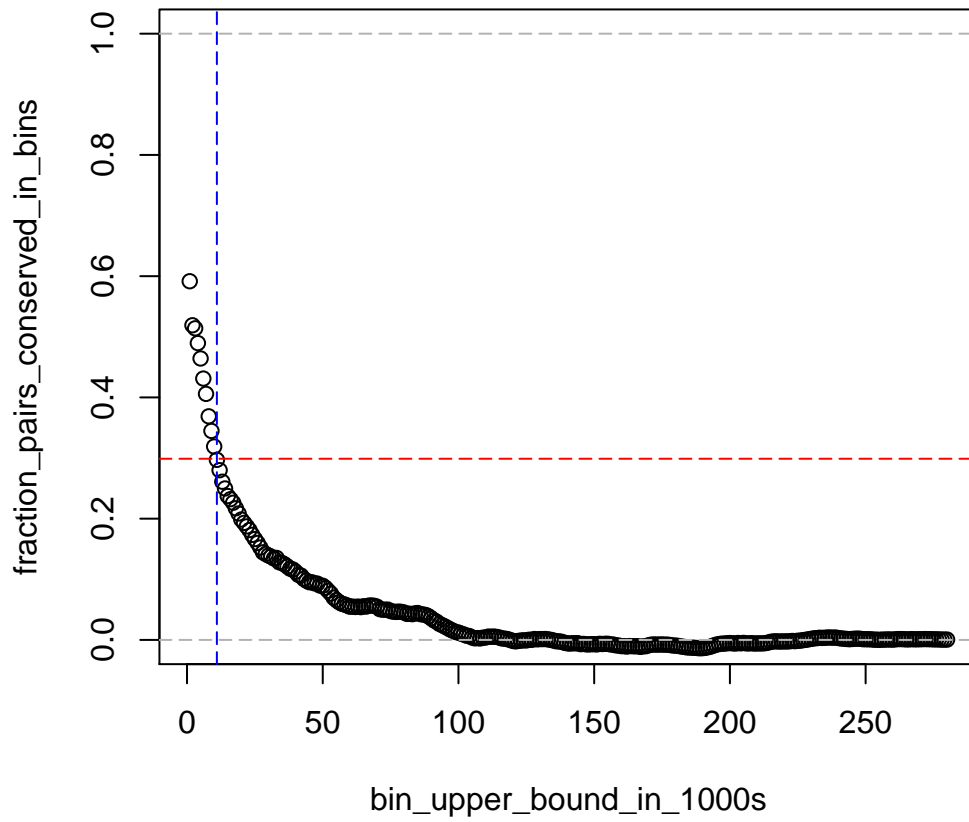

**Bin\_conservation\_minus\_bg\_GM0701.1\_vs\_OR0704.2.2**  
**PD-0.449101**

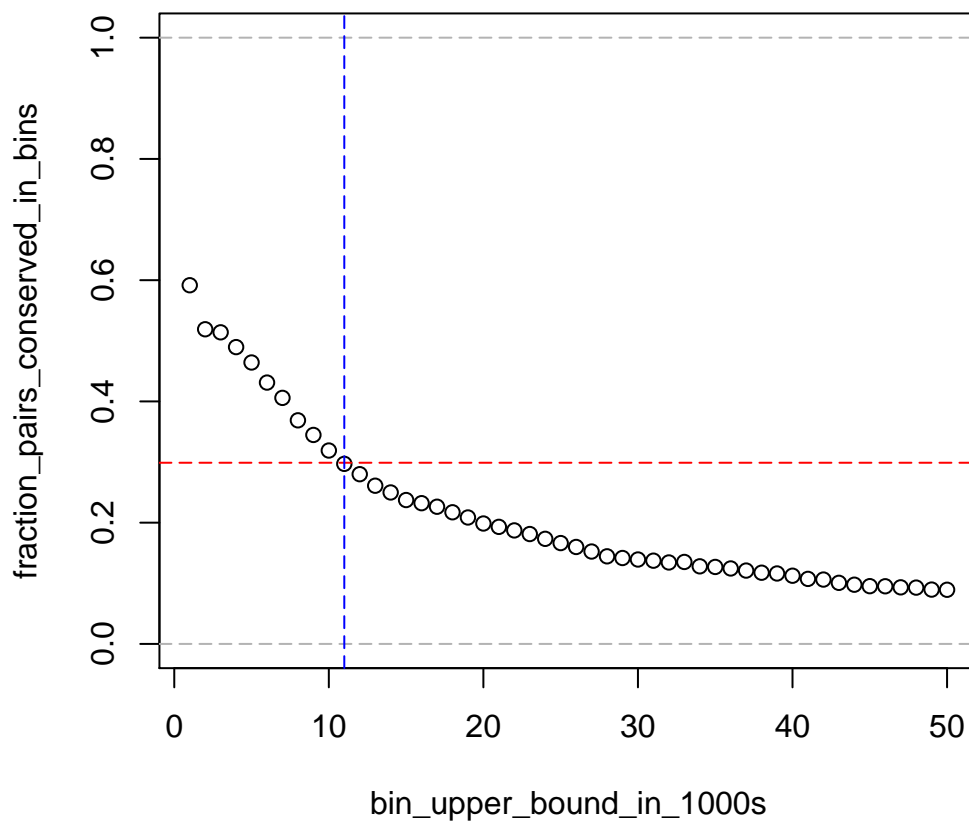

Supplement: s1 [file s1]

**Bin\_conservation\_minus\_bg\_AP110A\_vs\_Canal-1**  
**PD-0.463164**

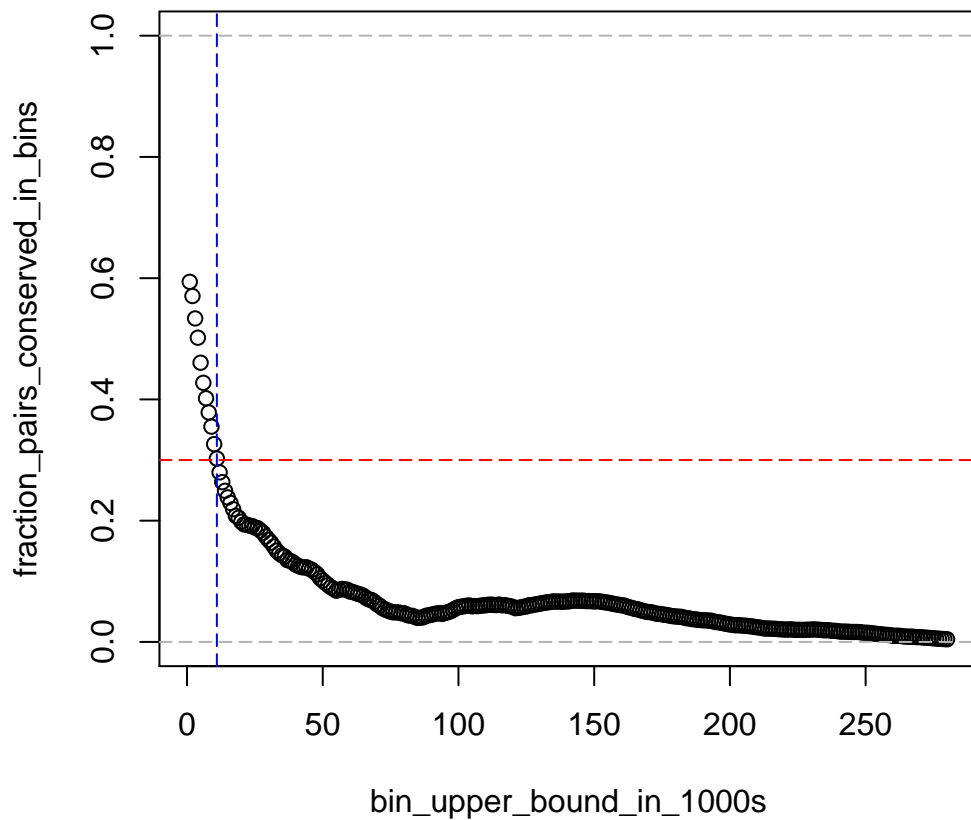

**Bin\_conservation\_minus\_bg\_AP110A\_vs\_Canal-1**  
**PD-0.463164**

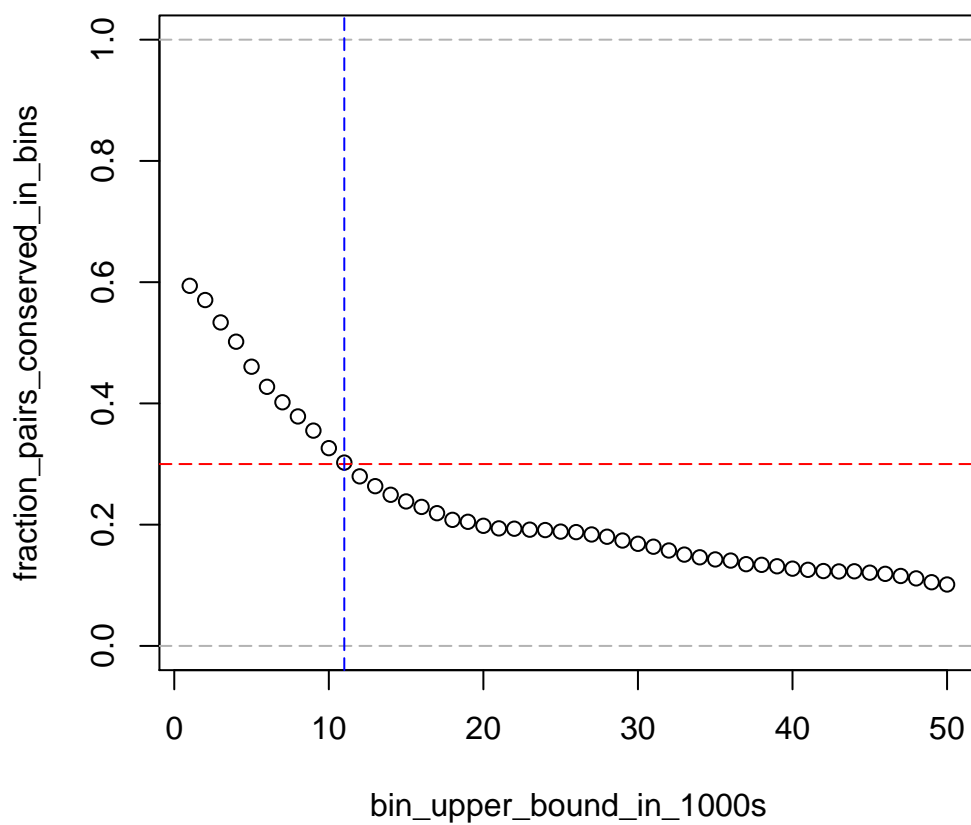

Supplement: s1 [file s1]

**Bin\_conservation\_minus\_bg\_AR158\_vs\_Can0610SP**  
**PD-0.705657**

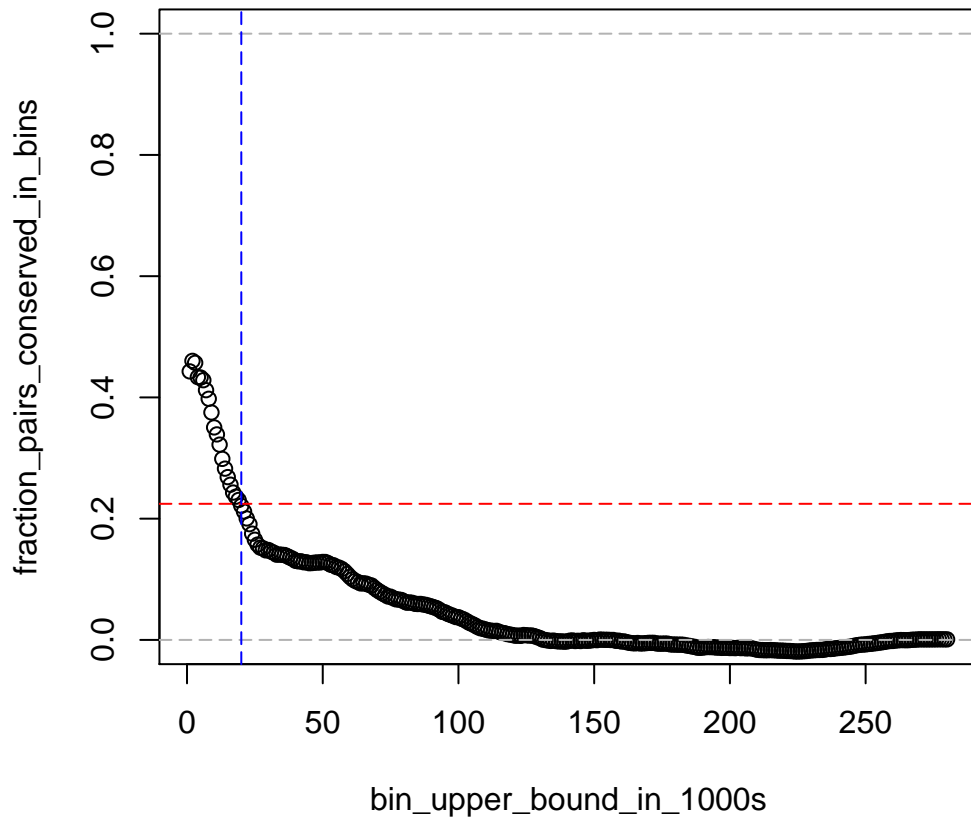

**Bin\_conservation\_minus\_bg\_AR158\_vs\_Can0610SP**  
**PD-0.705657**

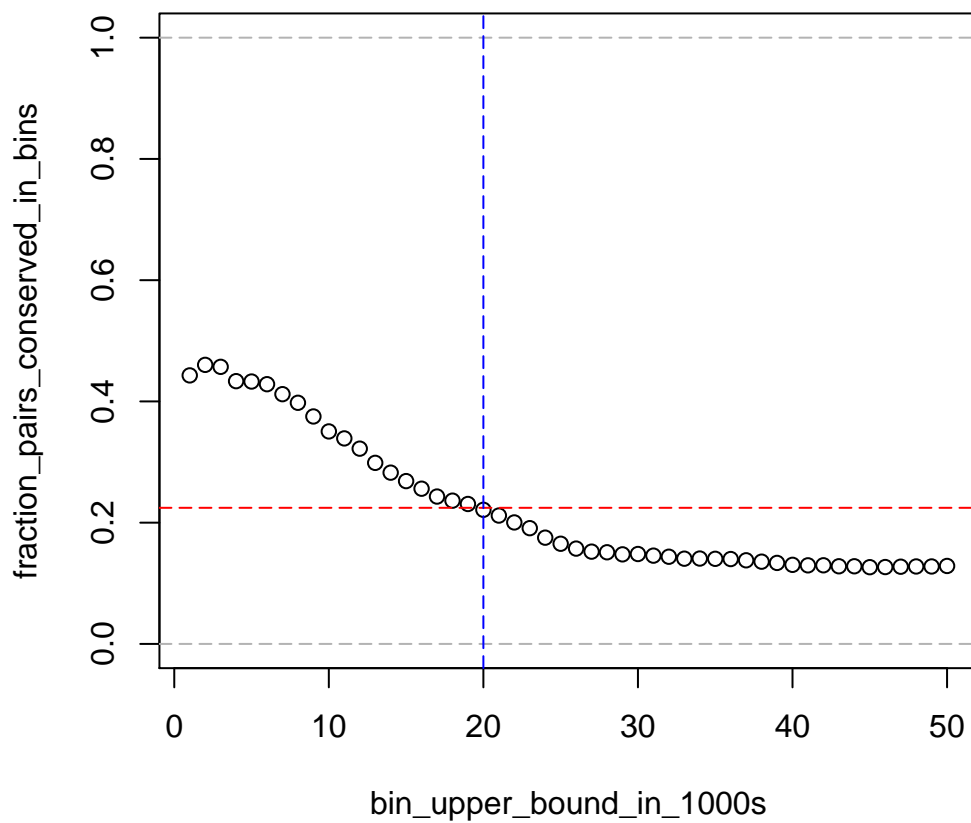

Supplement: s1 [file s1]

**Bin\_conservation\_minus\_bg\_AP110A\_vs\_NE-JV-1**  
**PD-0.359978**

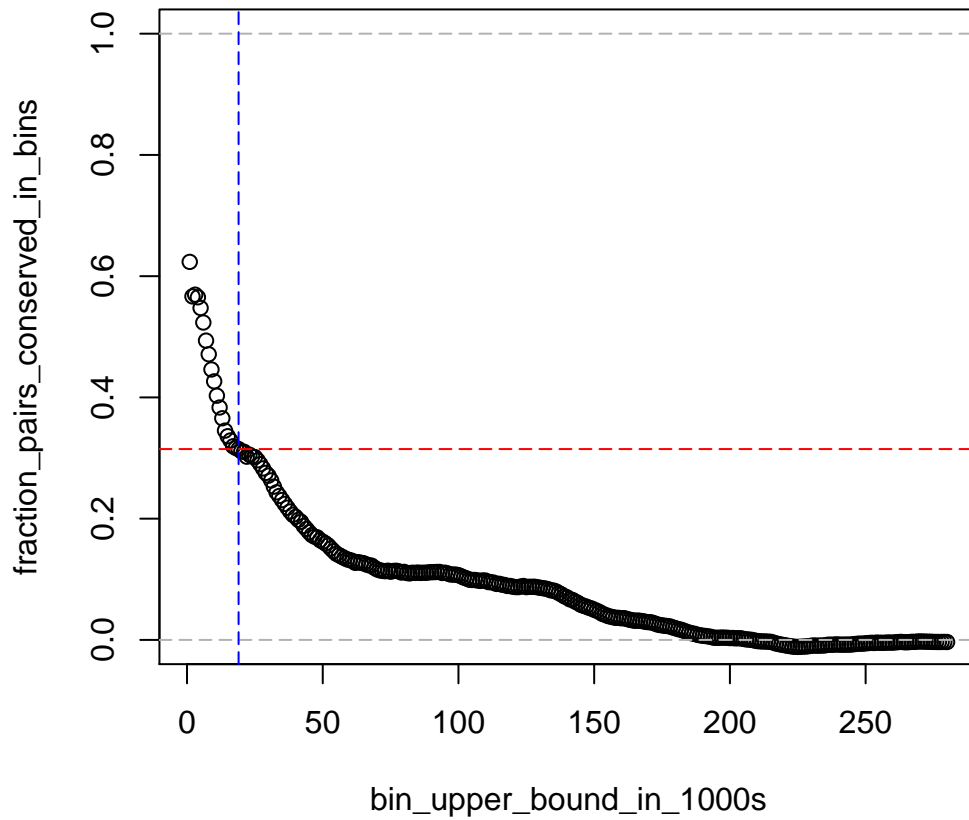

**Bin\_conservation\_minus\_bg\_AP110A\_vs\_NE-JV-1**  
**PD-0.359978**

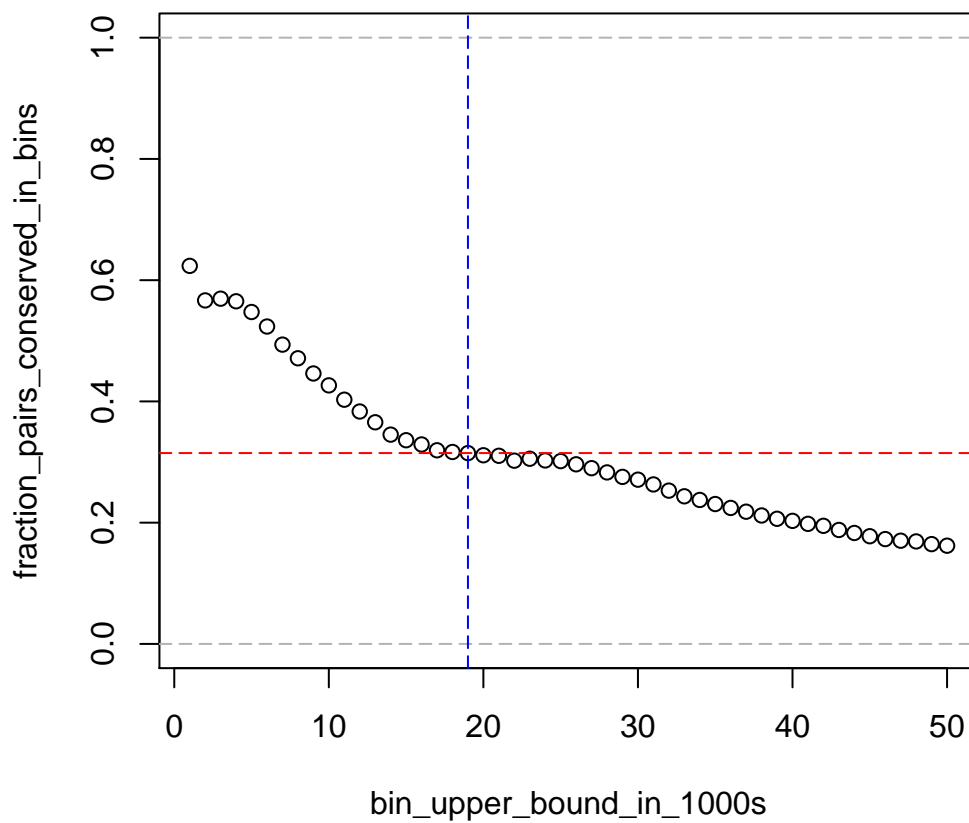

Supplement: s1 [file s1]

**Bin\_conservation\_minus\_bg\_Canal-1\_vs\_MA-1E**  
**PD-0.695284**

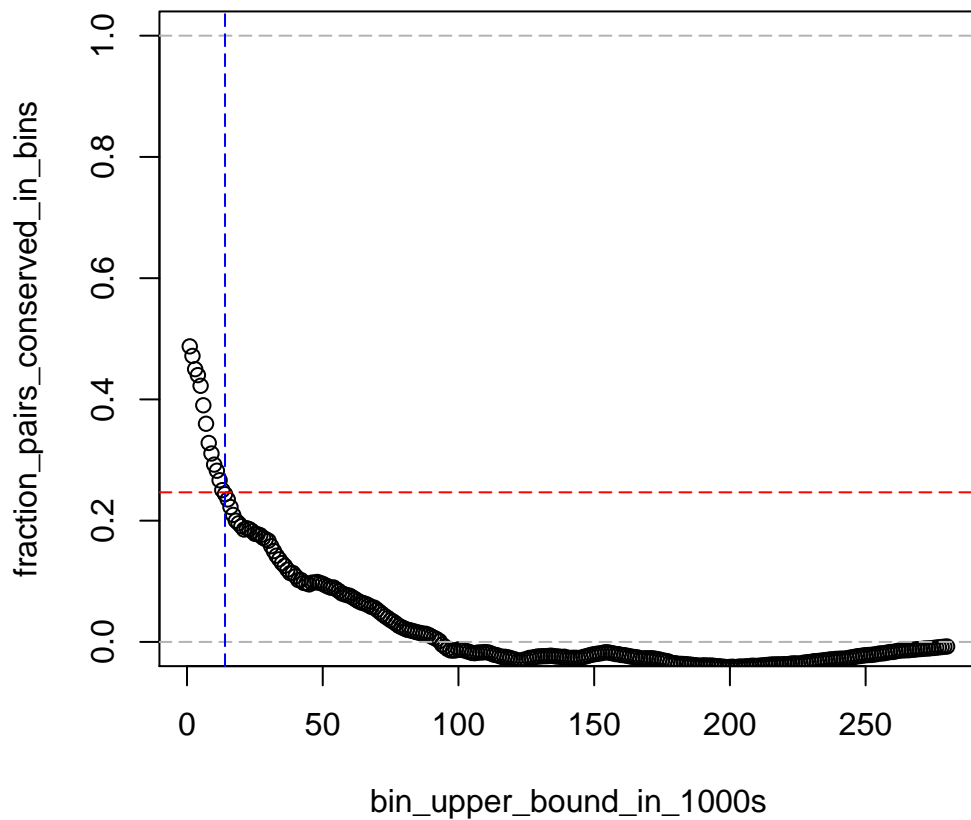

**Bin\_conservation\_minus\_bg\_Canal-1\_vs\_MA-1E**  
**PD-0.695284**

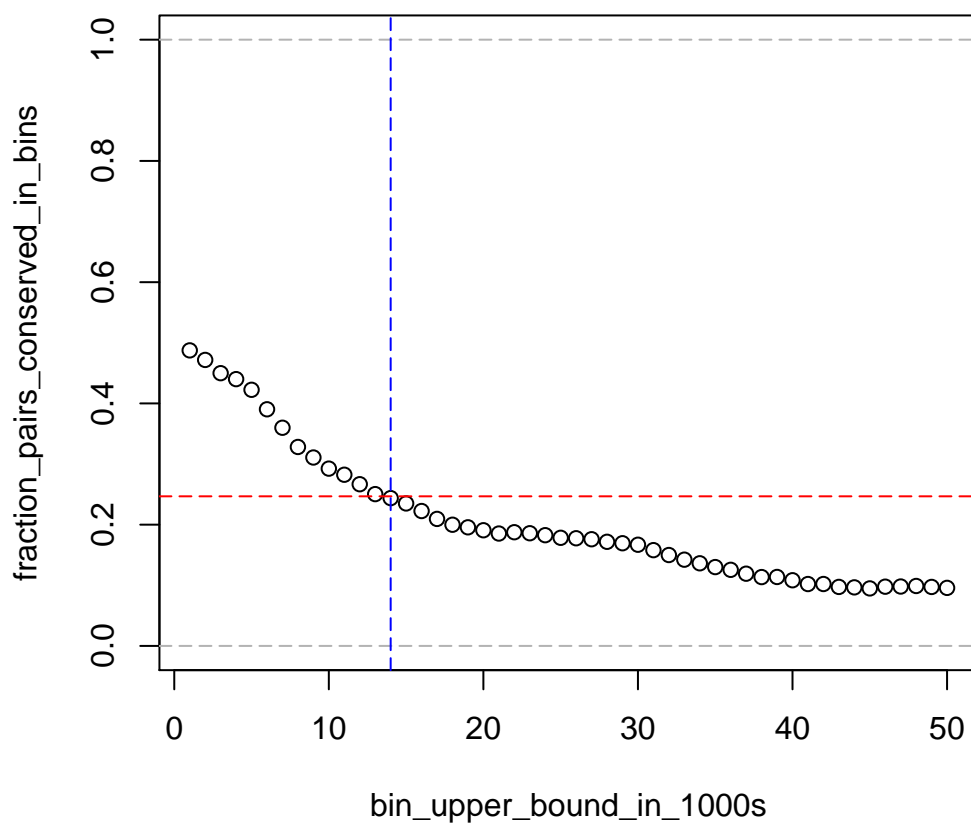

Supplement: s1 [file s1]

**Bin\_conservation\_minus\_bg\_NTS-1\_vs\_OR0704.2.2**  
**PD-0.454353**

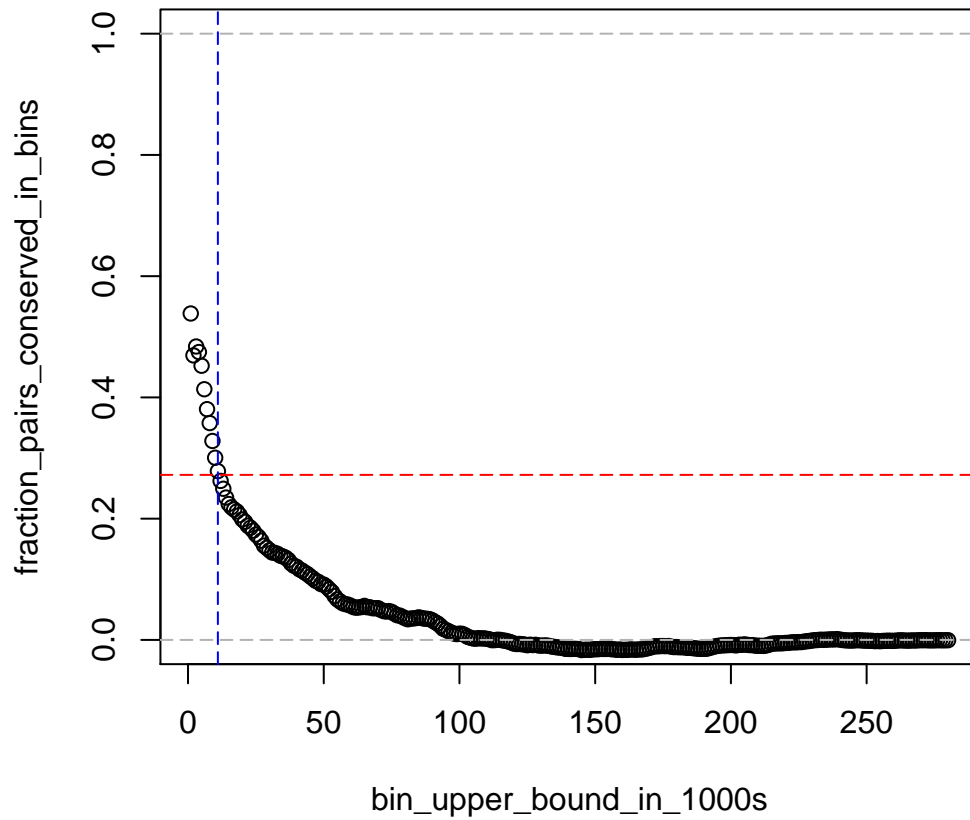

**Bin\_conservation\_minus\_bg\_NTS-1\_vs\_OR0704.2.2**  
**PD-0.454353**

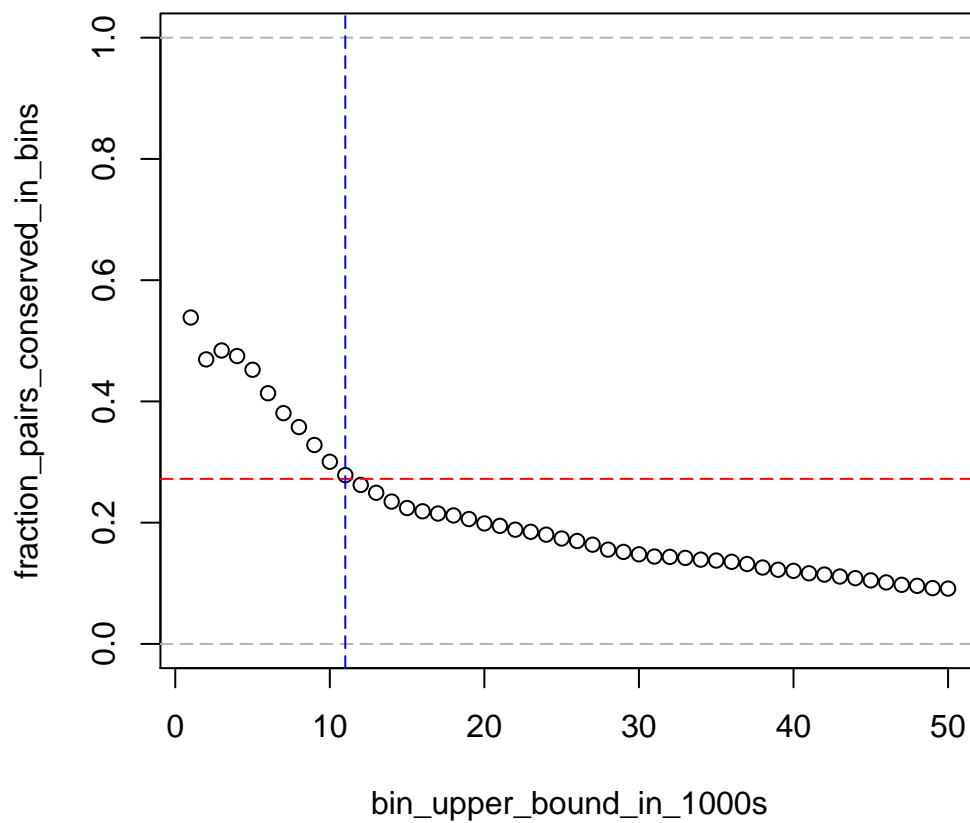

Supplement: s1 [file s1]

**Bin\_conservation\_minus\_bg\_AN69C\_vs\_Can18-4**  
**PD-0.645884**

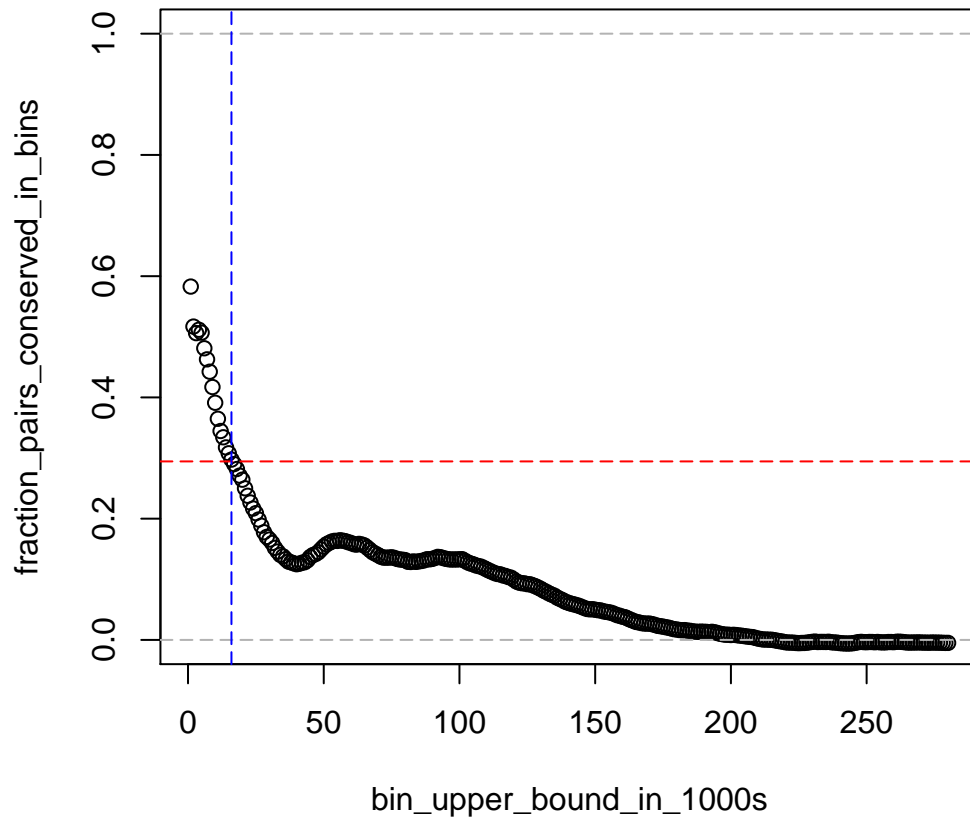

**Bin\_conservation\_minus\_bg\_AN69C\_vs\_Can18-4**  
**PD-0.645884**

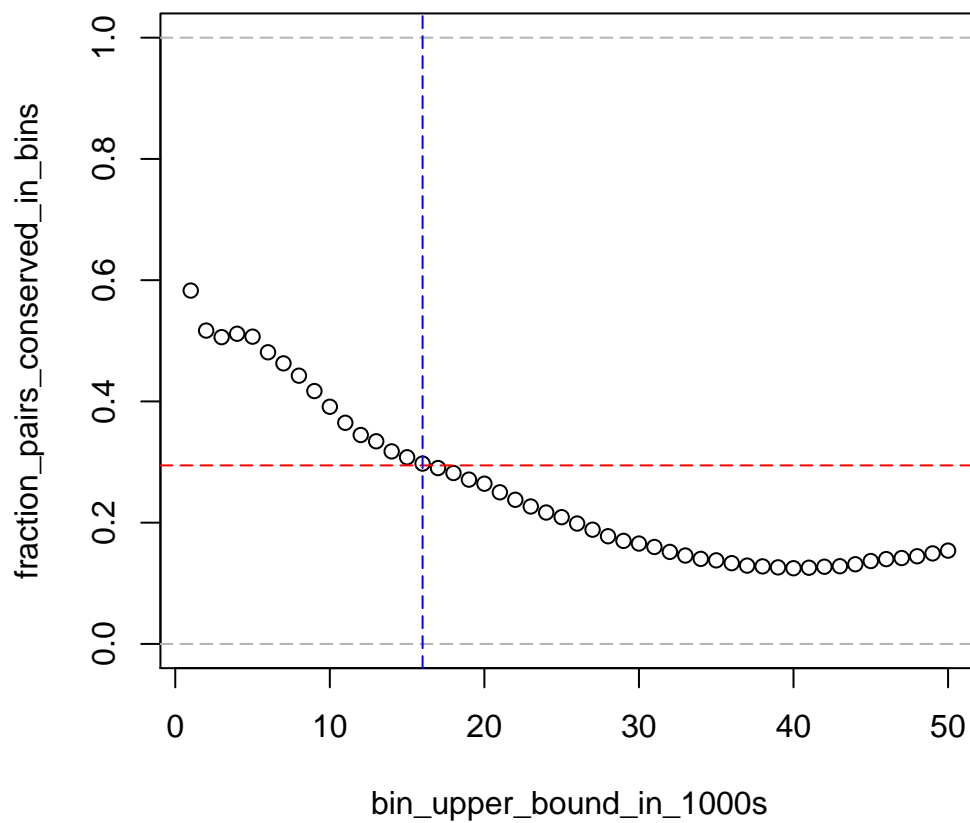

Supplement: s1 [file s1]

**Bin\_conservation\_minus\_bg\_CviKI\_vs\_IL-3A**  
**PD-0.013621**

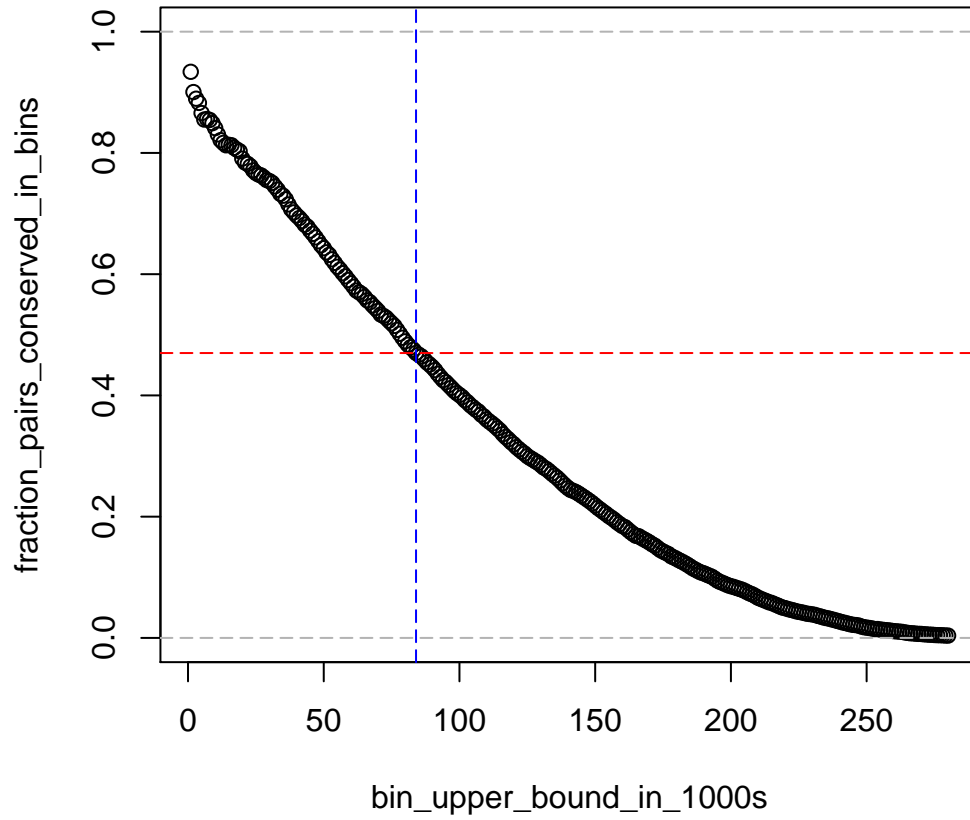

**Bin\_conservation\_minus\_bg\_CviKI\_vs\_IL-3A**  
**PD-0.013621**

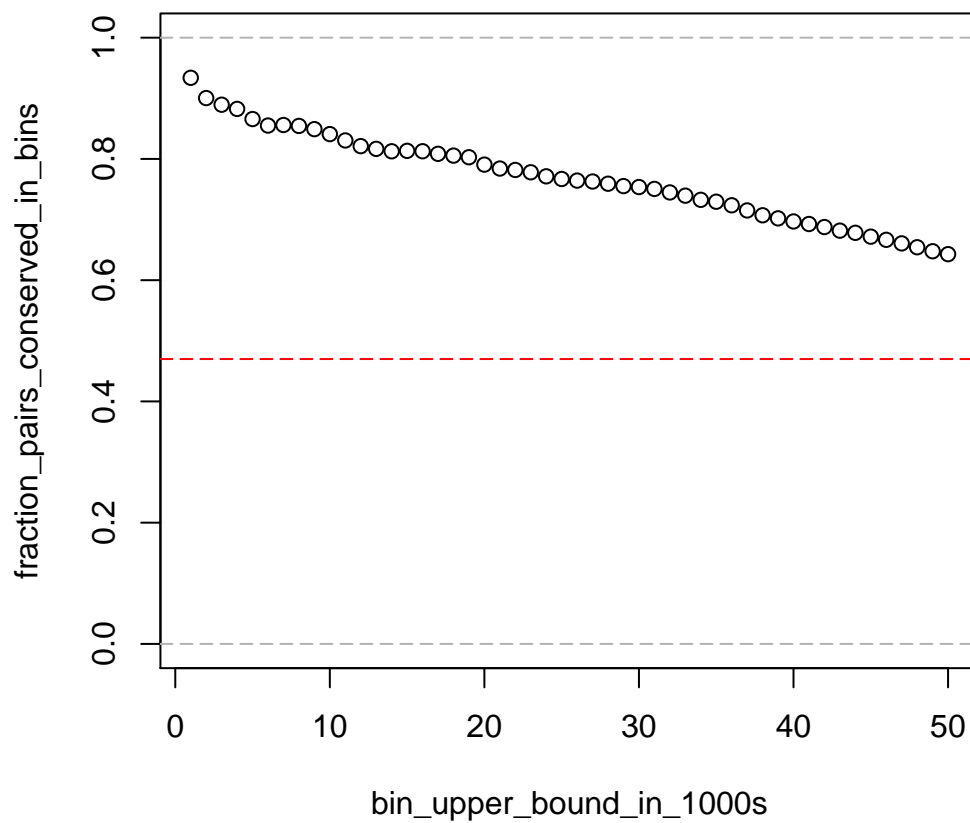

Supplement: s1 [file s1]

**Bin\_conservation\_minus\_bg\_CVB-1\_vs\_CVG-1**  
**PD-0.030039**

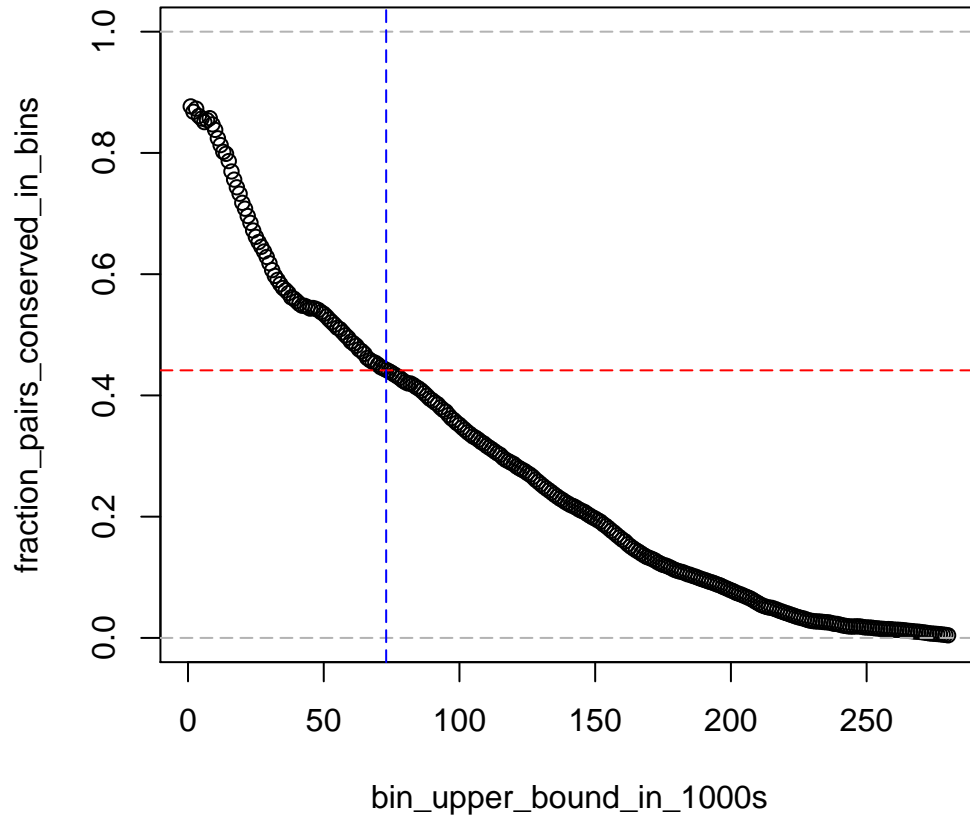

**Bin\_conservation\_minus\_bg\_CVB-1\_vs\_CVG-1**  
**PD-0.030039**

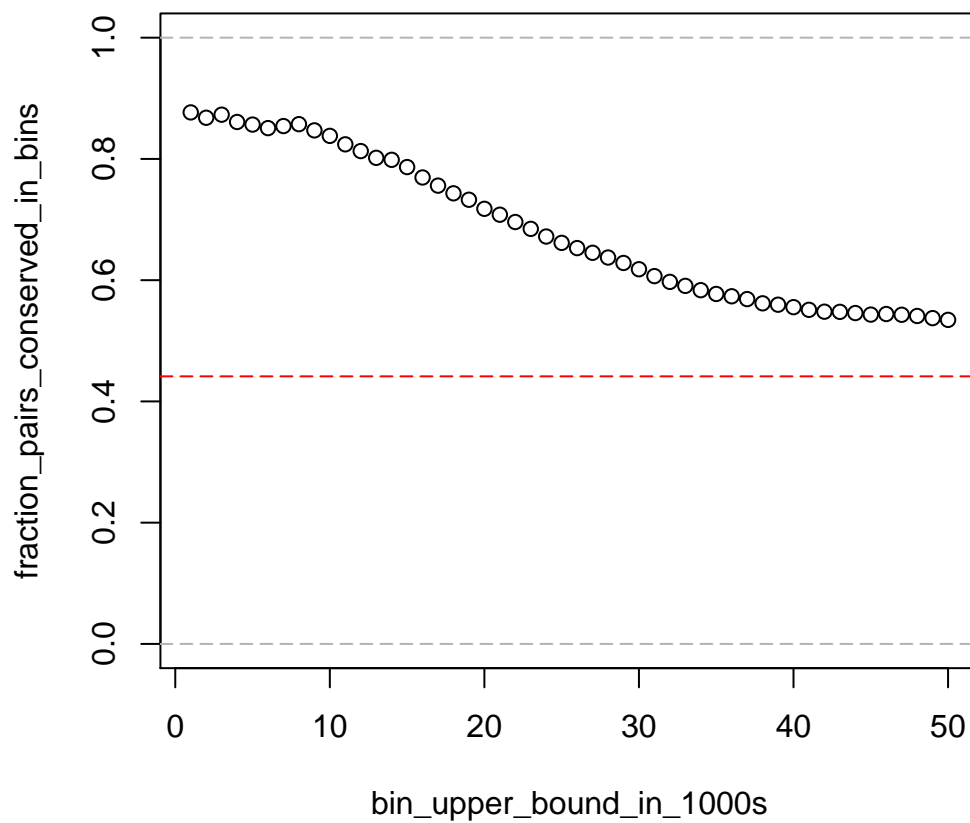

Supplement: s1 [file s1]

**Bin\_conservation\_minus\_bg\_Canal-1\_vs\_NW665.2**  
**PD-0.463834**

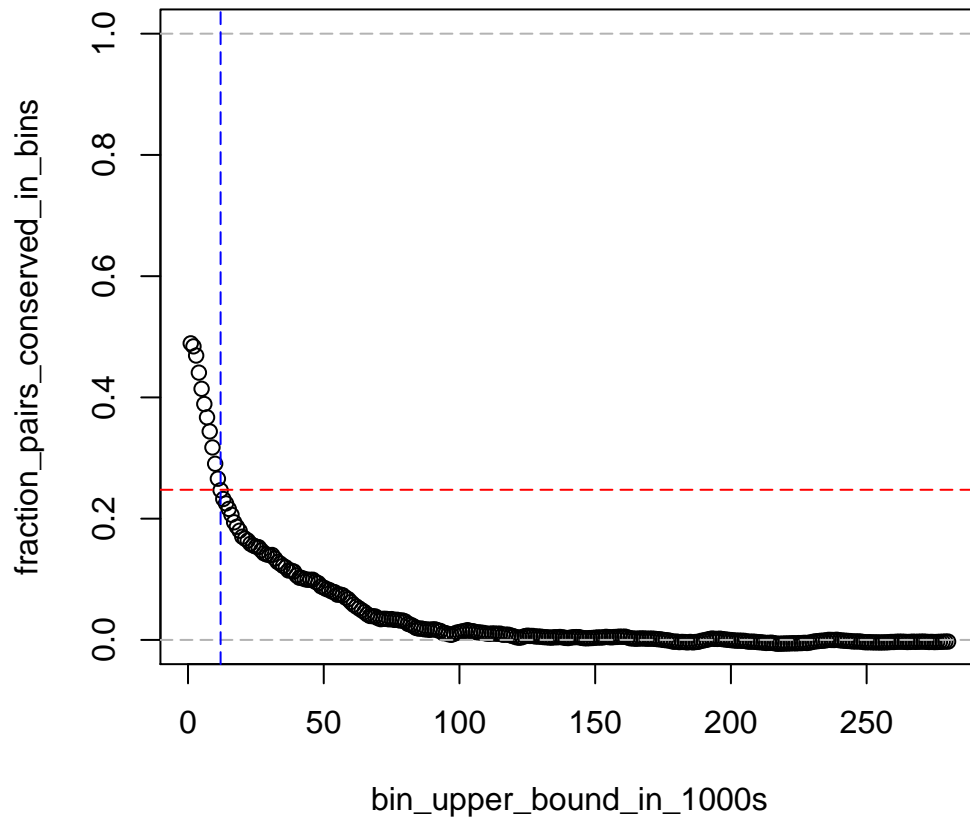

**Bin\_conservation\_minus\_bg\_Canal-1\_vs\_NW665.2**  
**PD-0.463834**

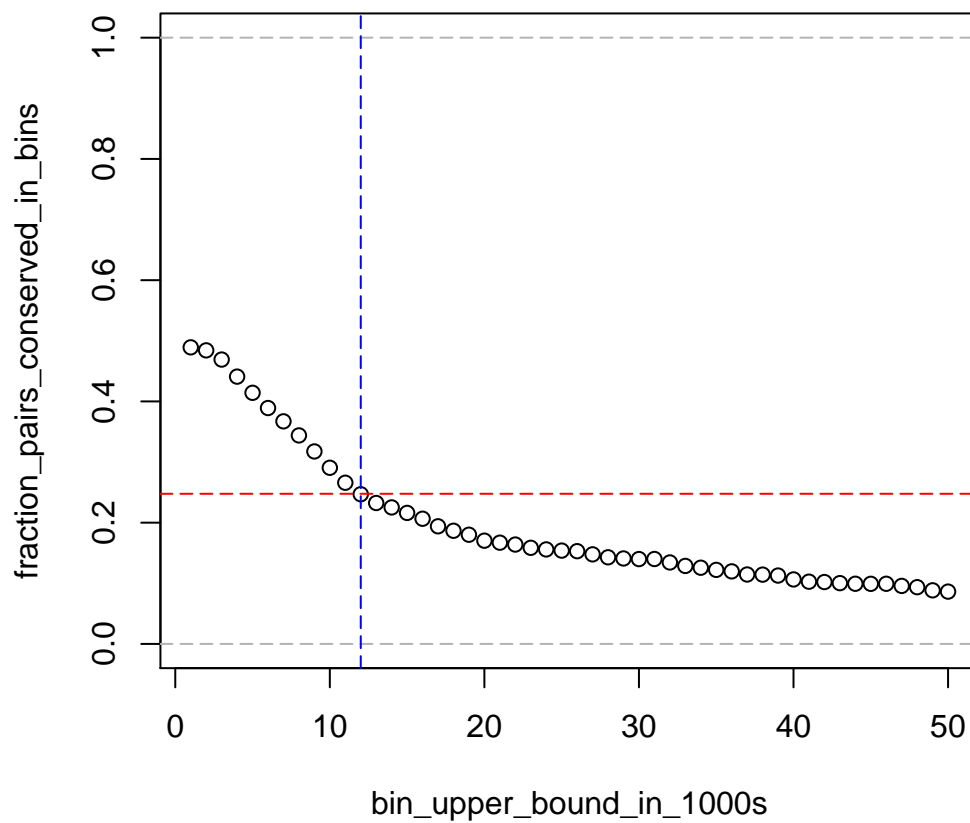

Supplement: s1 [file s1]

**Bin\_conservation\_minus\_bg\_Can18-4\_vs\_OR0704.2.2**  
**PD-0.045733**

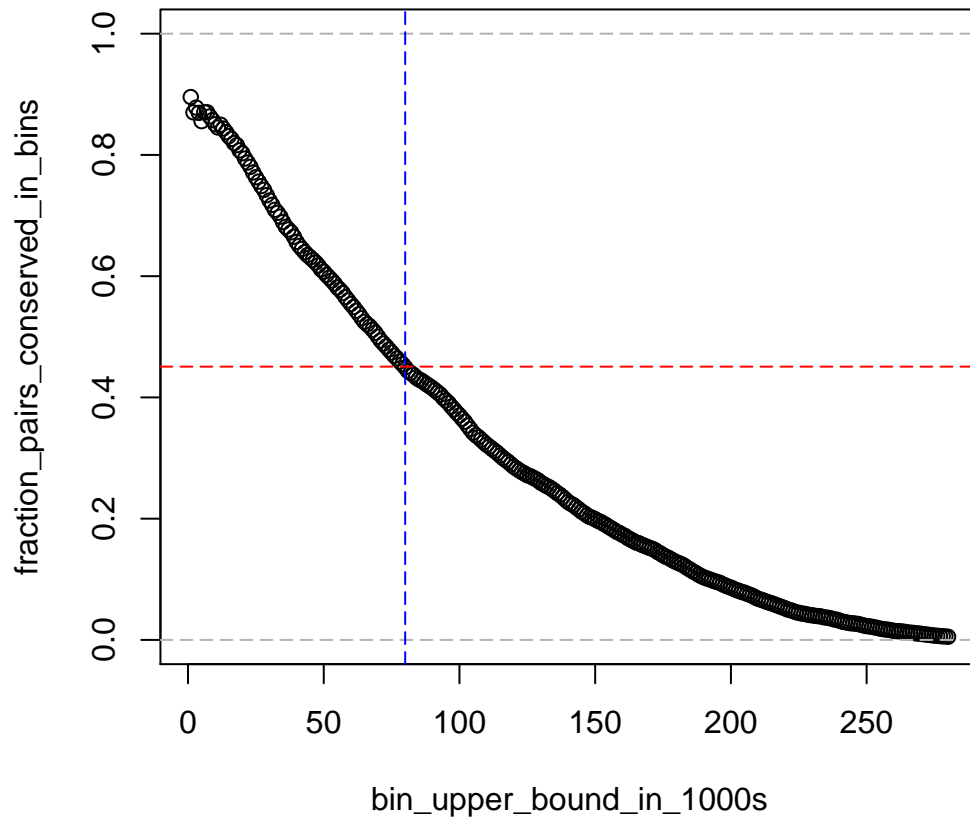

**Bin\_conservation\_minus\_bg\_Can18-4\_vs\_OR0704.2.2**  
**PD-0.045733**

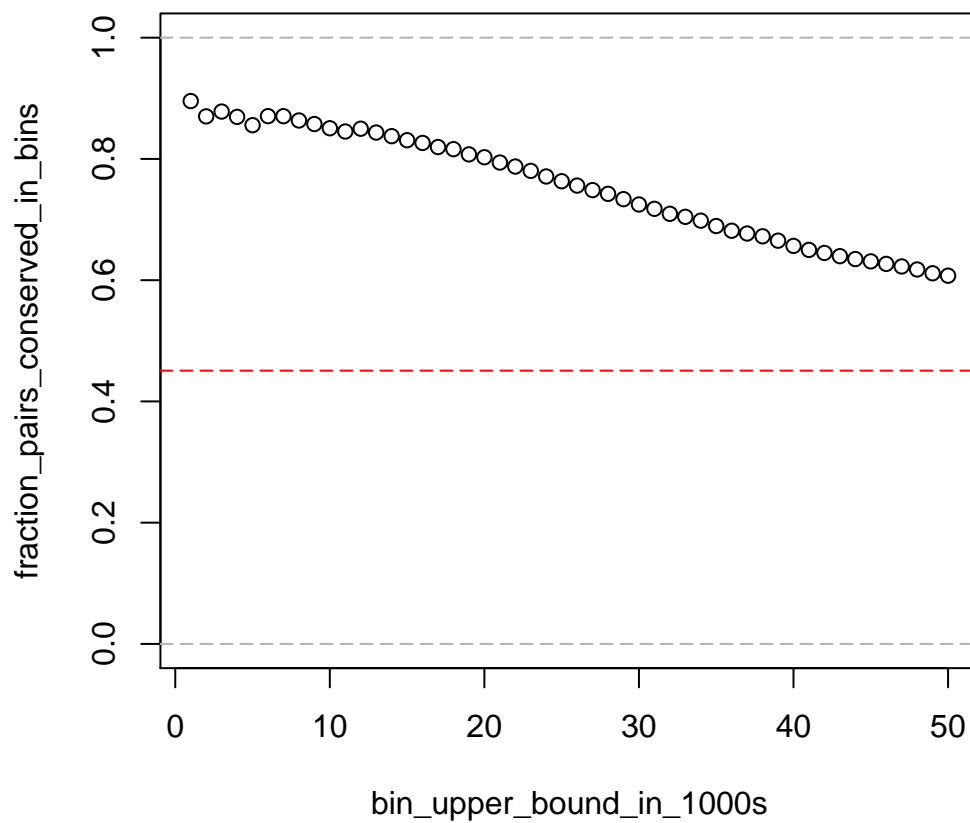

Supplement: s1 [file s1]

**Bin\_conservation\_minus\_bg\_NE-JV-1\_vs\_OR0704.3**  
**PD-0.49414**

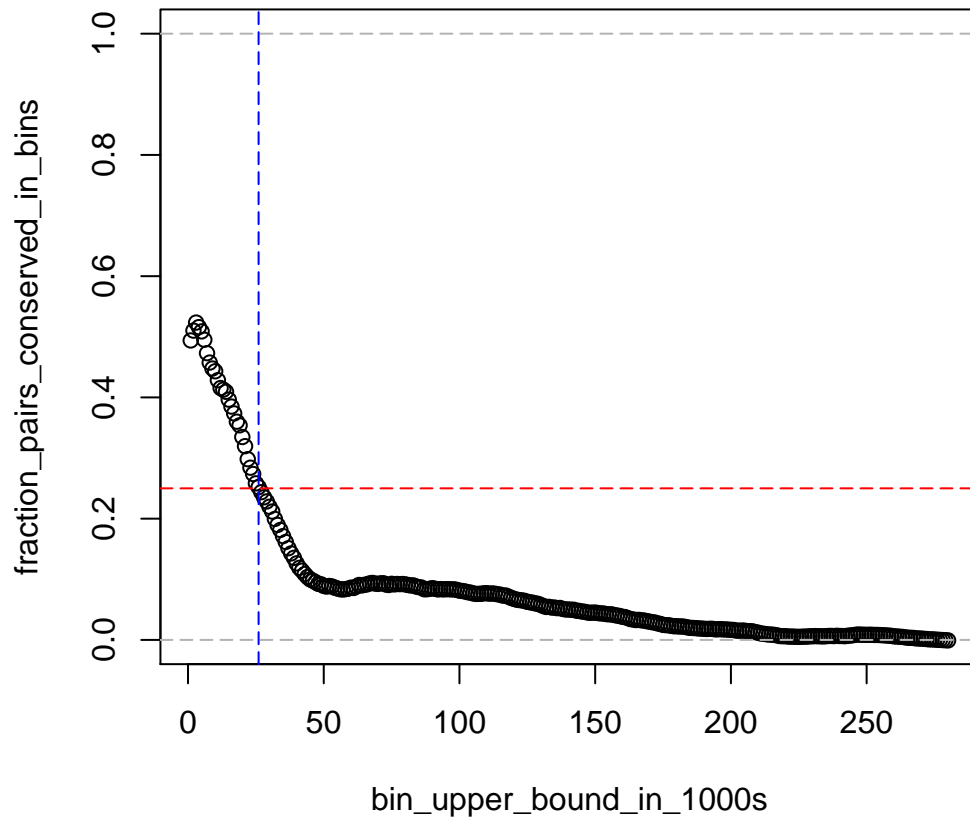

**Bin\_conservation\_minus\_bg\_NE-JV-1\_vs\_OR0704.3**  
**PD-0.49414**

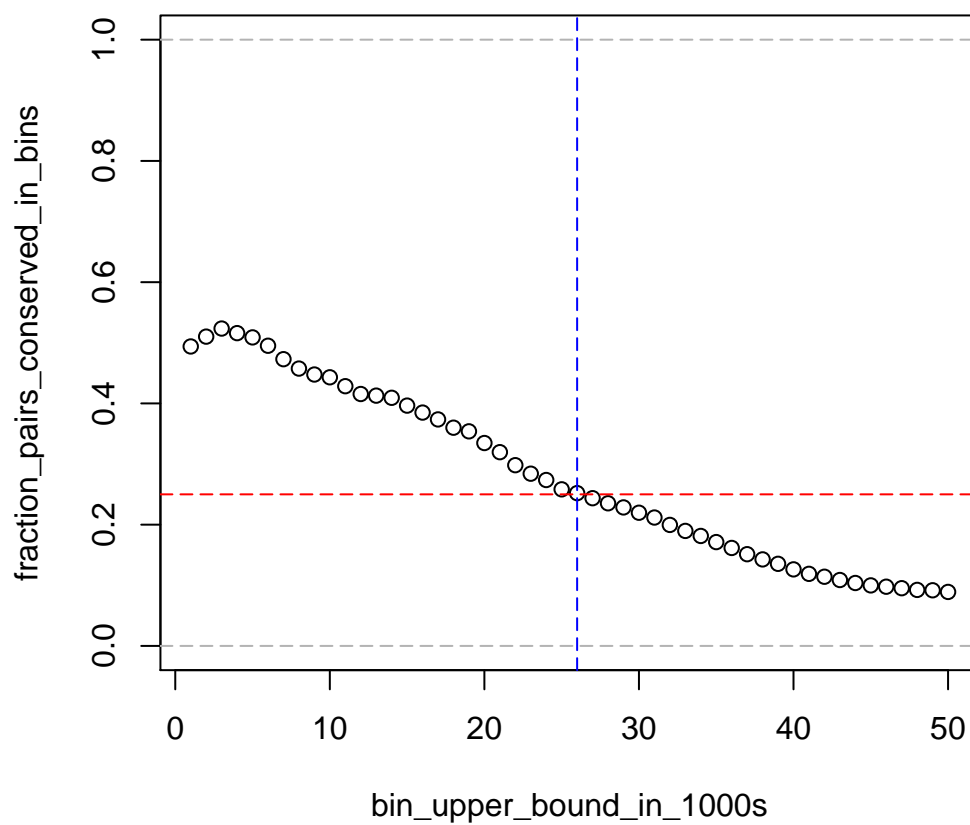

Supplement: s1 [file s1]

**Bin\_conservation\_minus\_bg\_NE-JV-2\_vs\_NW665.2**  
**PD-0.463169**

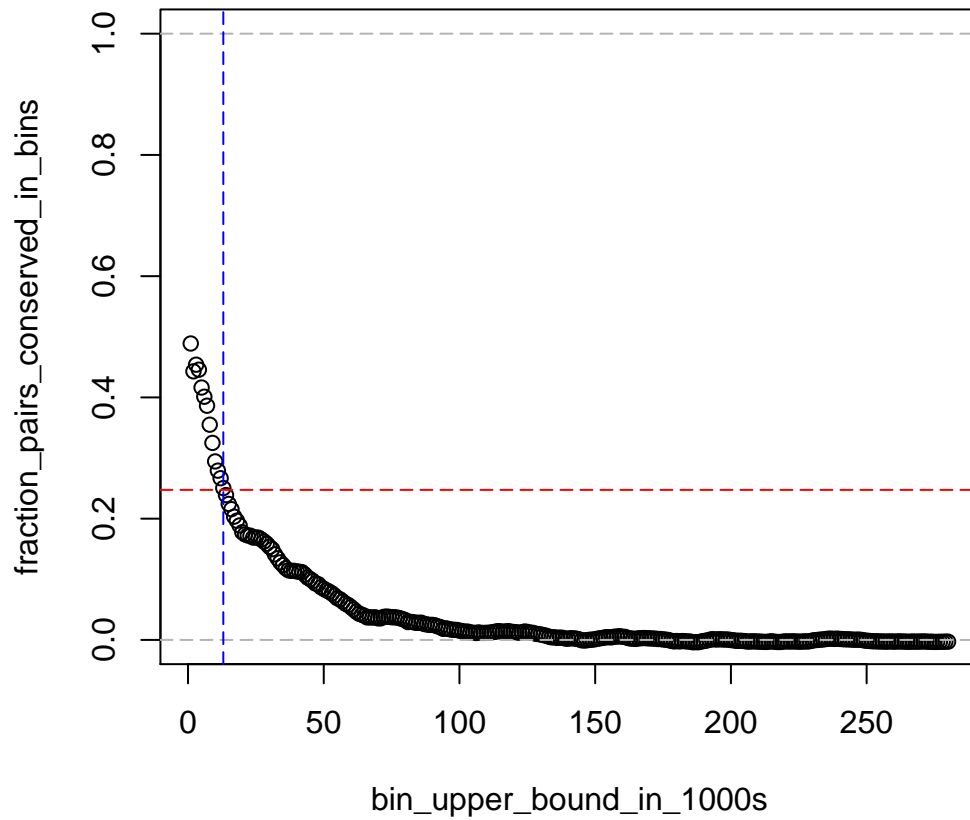

**Bin\_conservation\_minus\_bg\_NE-JV-2\_vs\_NW665.2**  
**PD-0.463169**

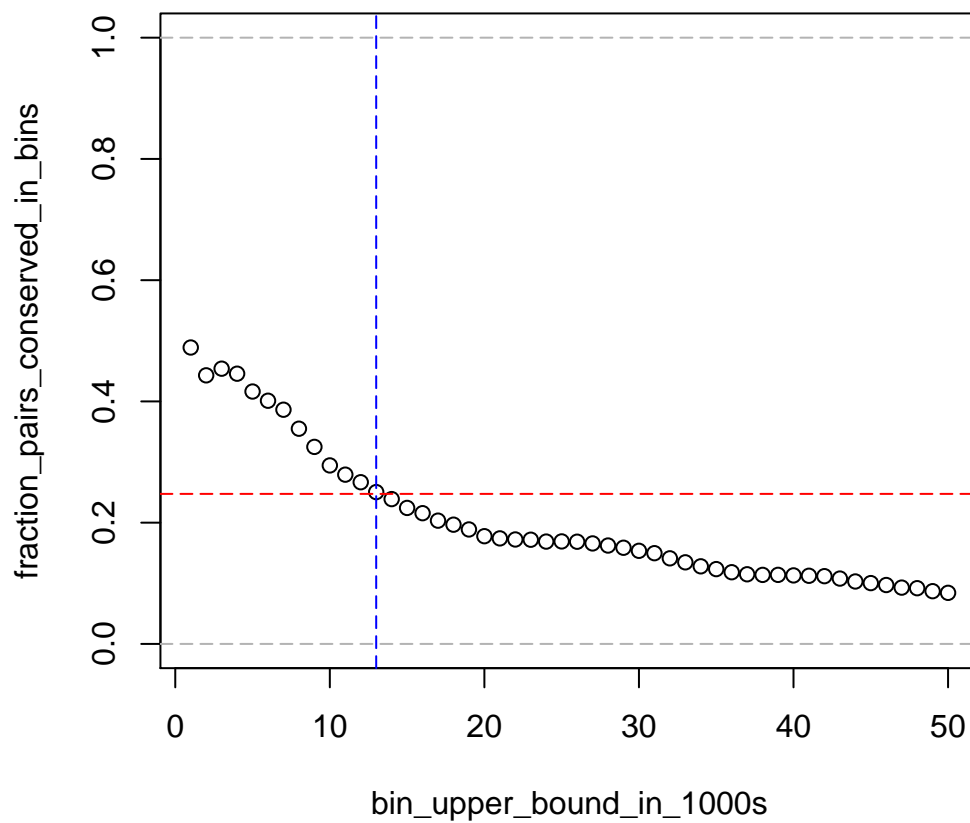

Supplement: s1 [file s1]

**Bin\_conservation\_minus\_bg\_Canal-1\_vs\_NE-JV-1**  
**PD-0.494492**

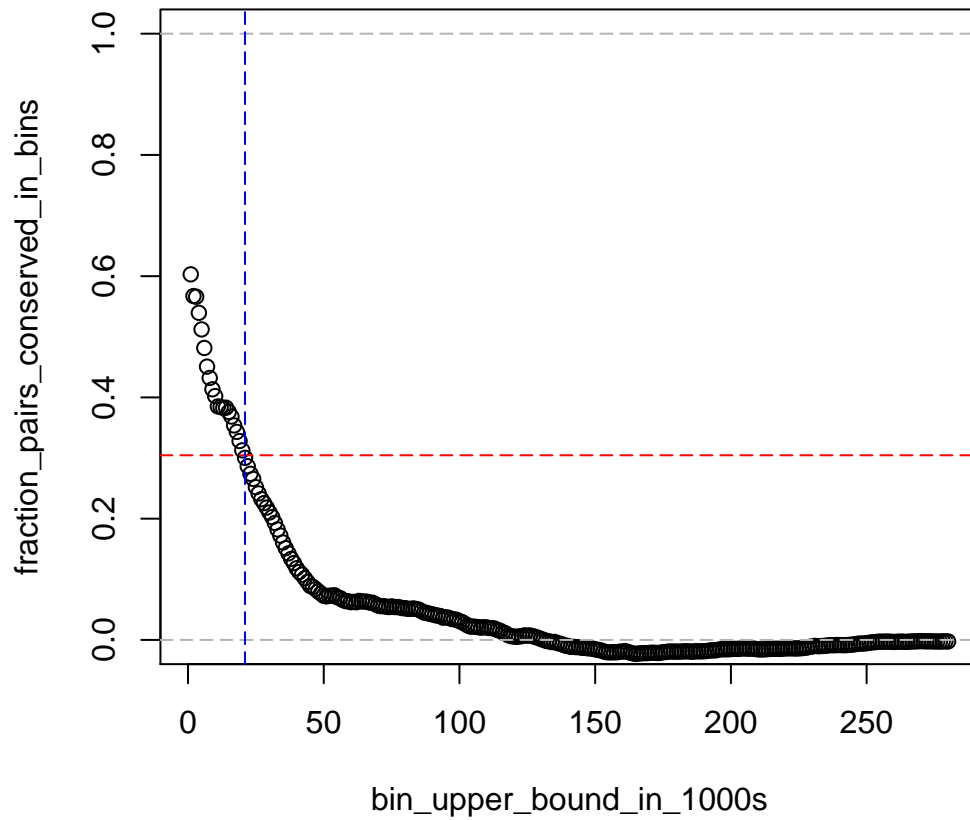

**Bin\_conservation\_minus\_bg\_Canal-1\_vs\_NE-JV-1**  
**PD-0.494492**

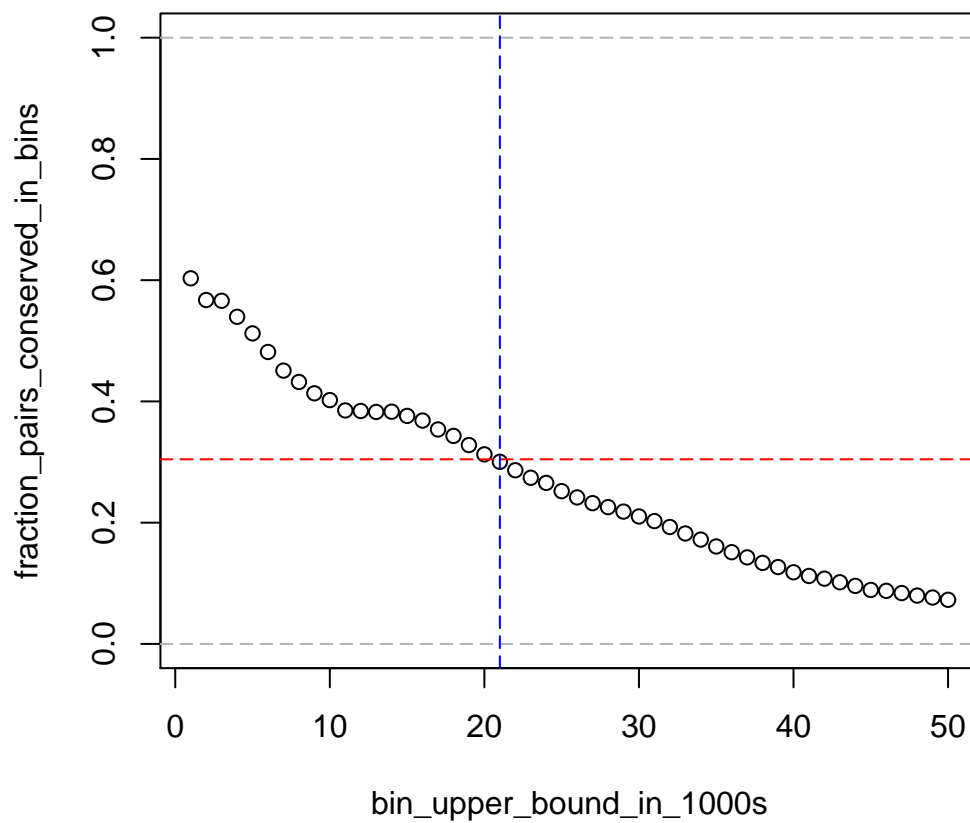

Supplement: s1 [file s1]

**Bin\_conservation\_minus\_bg\_MT325\_vs\_NY2A**  
**PD-0.666841**

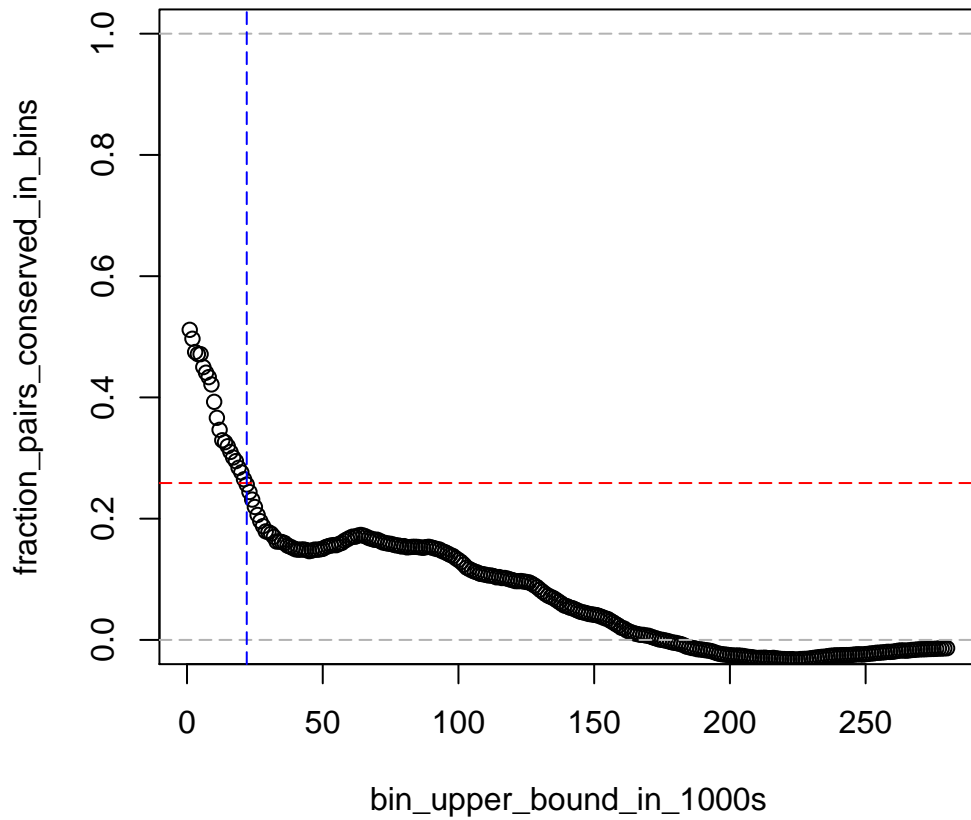

**Bin\_conservation\_minus\_bg\_MT325\_vs\_NY2A**  
**PD-0.666841**

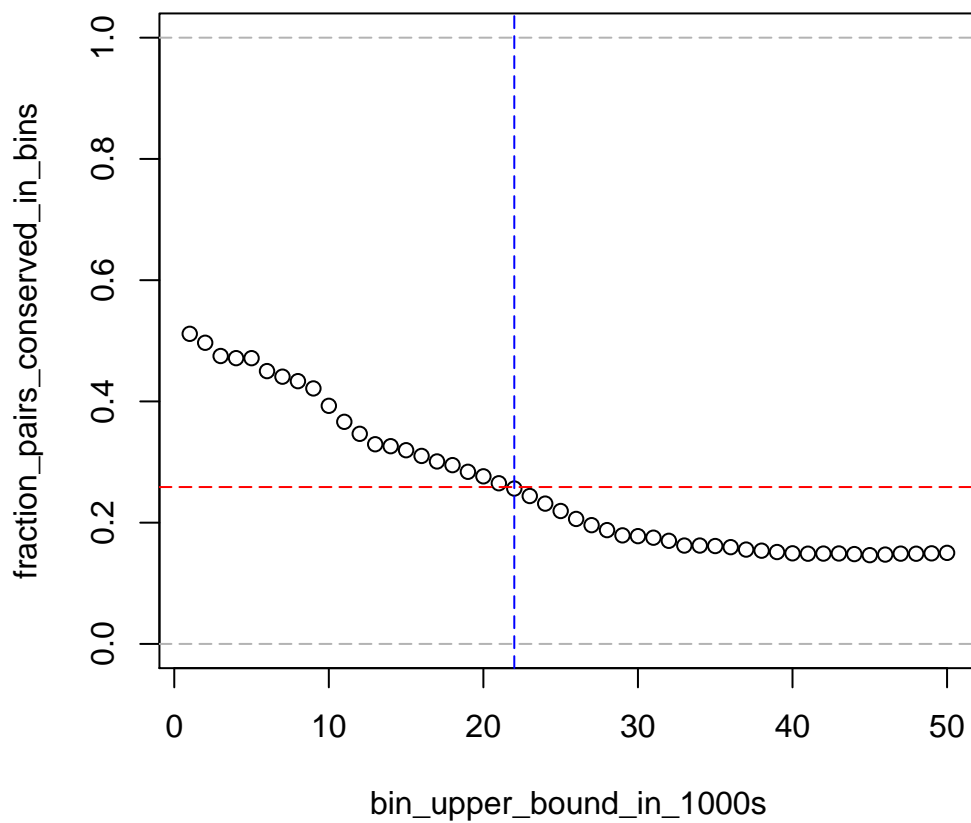

Supplement: s1 [file s1]

**Bin\_conservation\_minus\_bg\_AN69C\_vs\_CvsA1**  
**PD-0.017571**

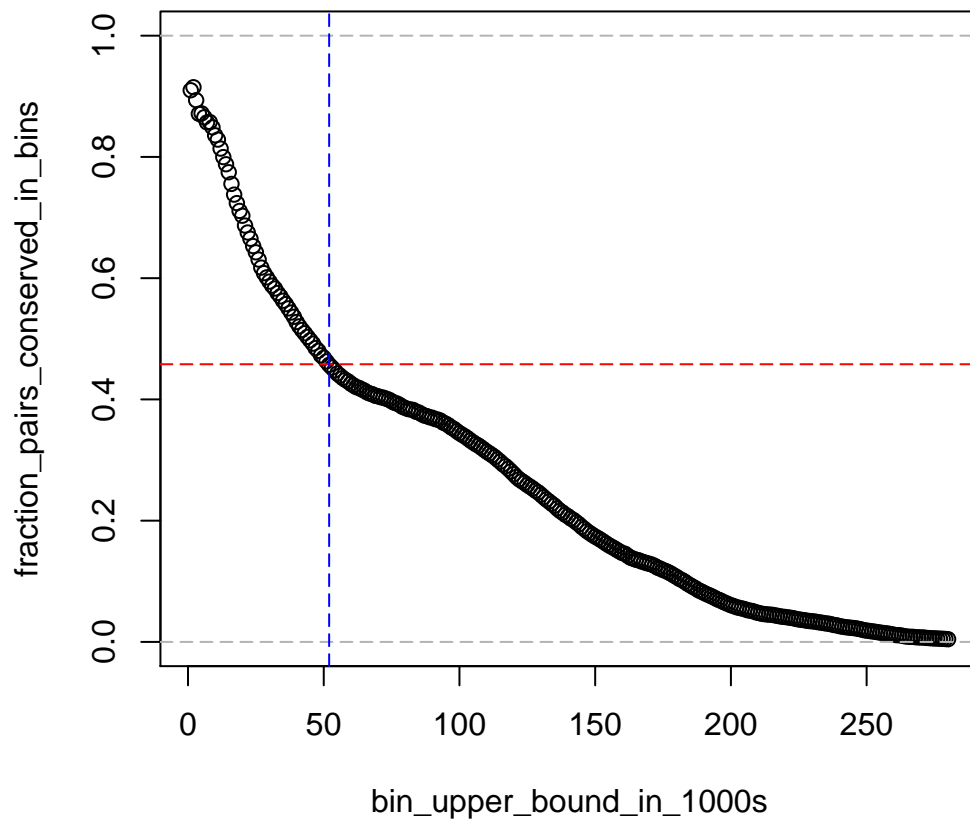

**Bin\_conservation\_minus\_bg\_AN69C\_vs\_CvsA1**  
**PD-0.017571**

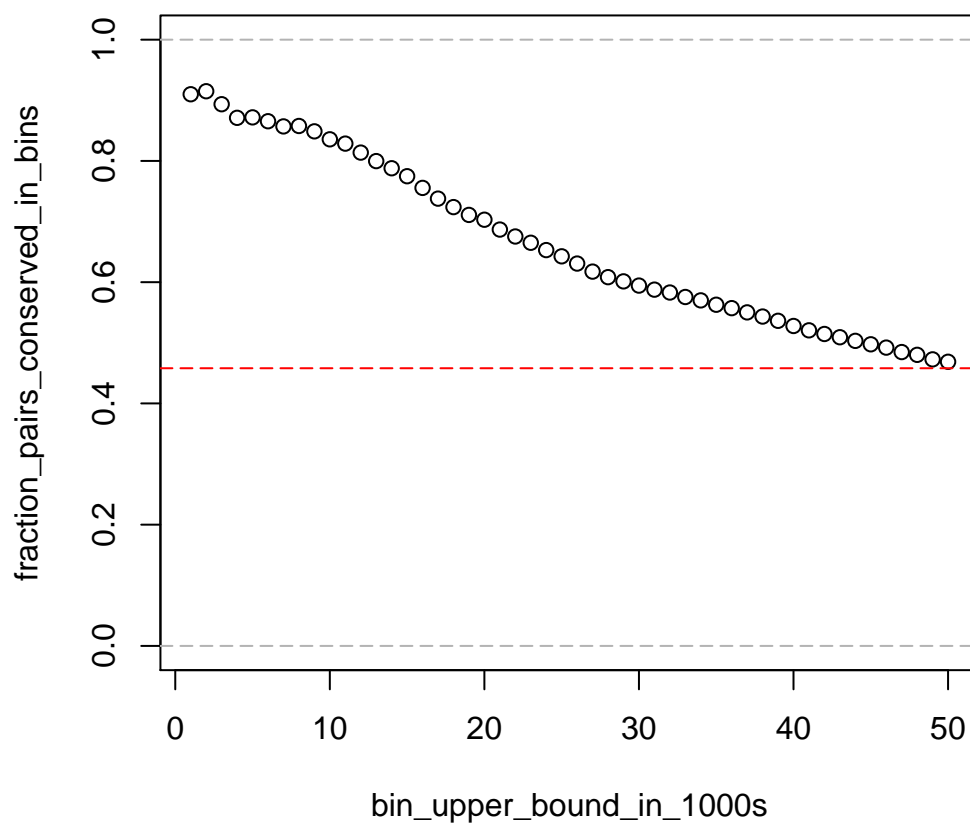

Supplement: s1 [file s1]

**Bin\_conservation\_minus\_bg\_AR158\_vs\_NE-JV-2**  
**PD-0.705354**

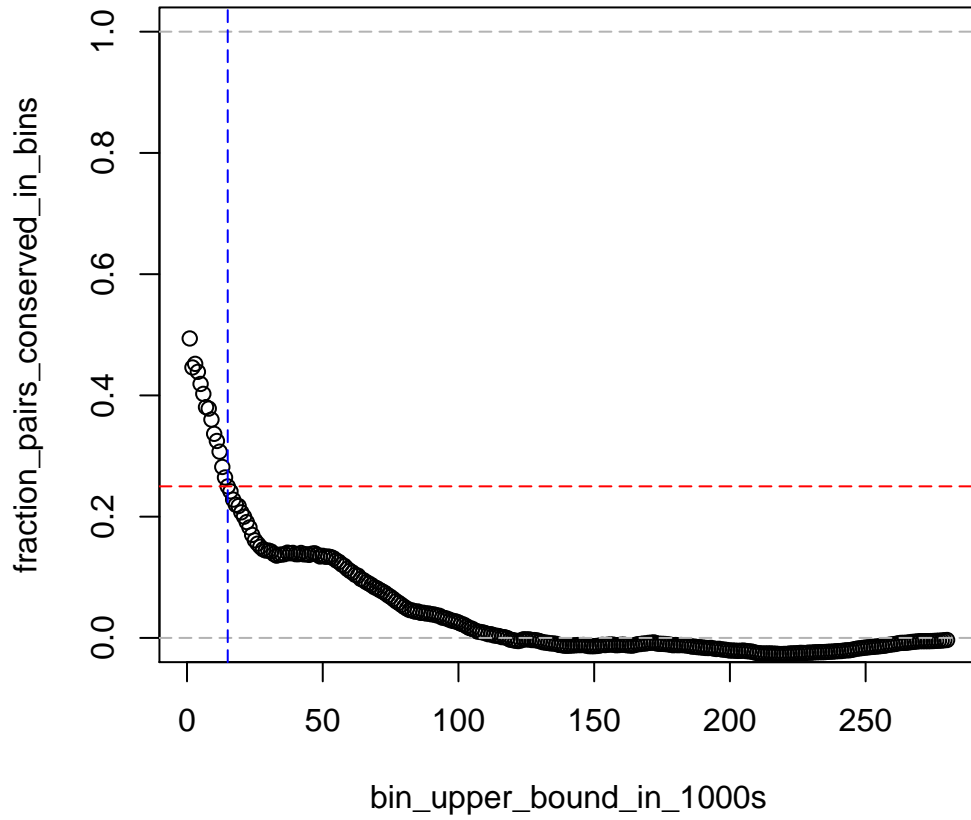

**Bin\_conservation\_minus\_bg\_AR158\_vs\_NE-JV-2**  
**PD-0.705354**

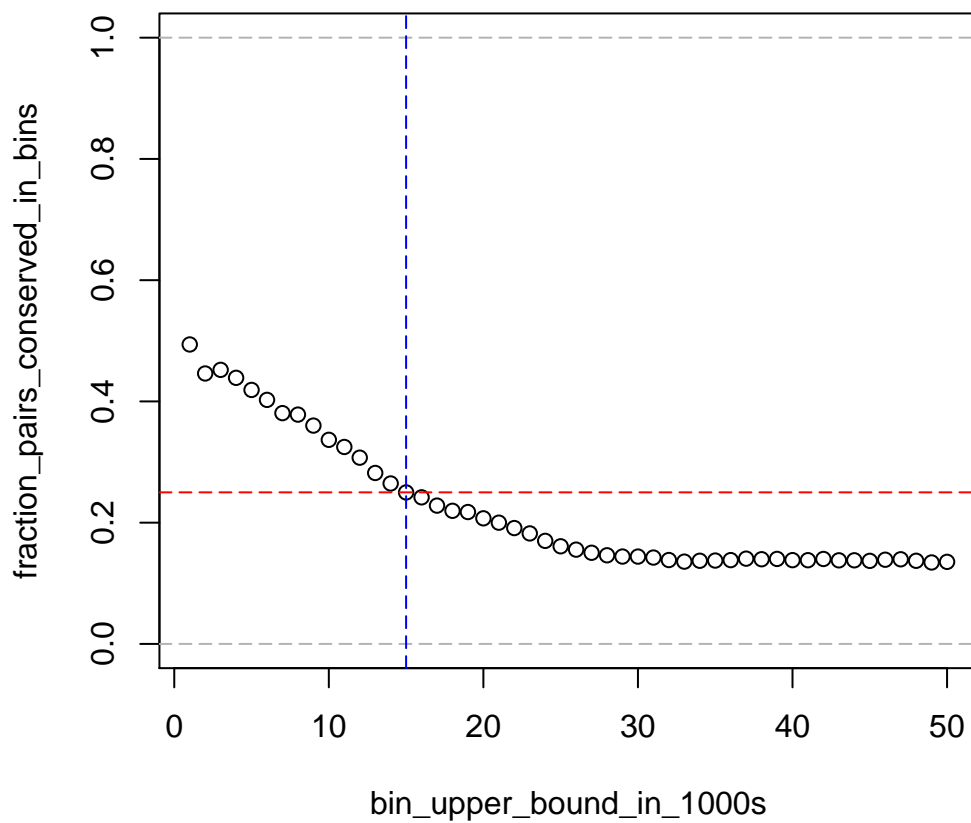

Supplement: s1 [file s1]

**Bin\_conservation\_minus\_bg\_CviKI\_vs\_CvsA1**  
**PD-0.003345**

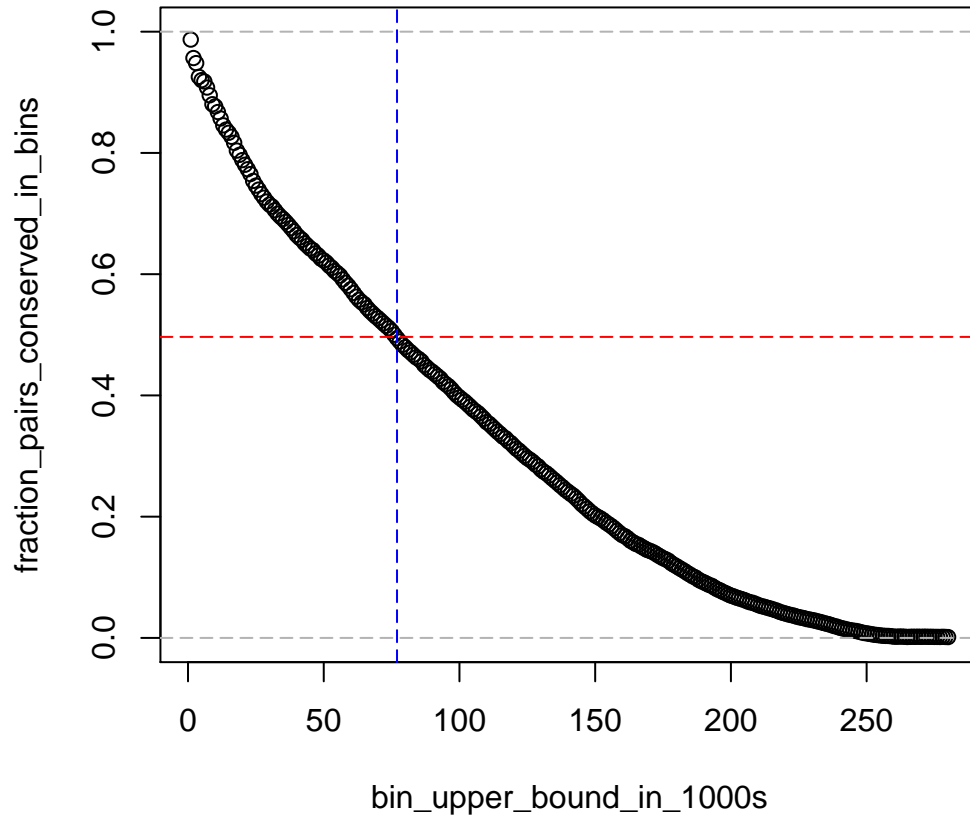

**Bin\_conservation\_minus\_bg\_CviKI\_vs\_CvsA1**  
**PD-0.003345**

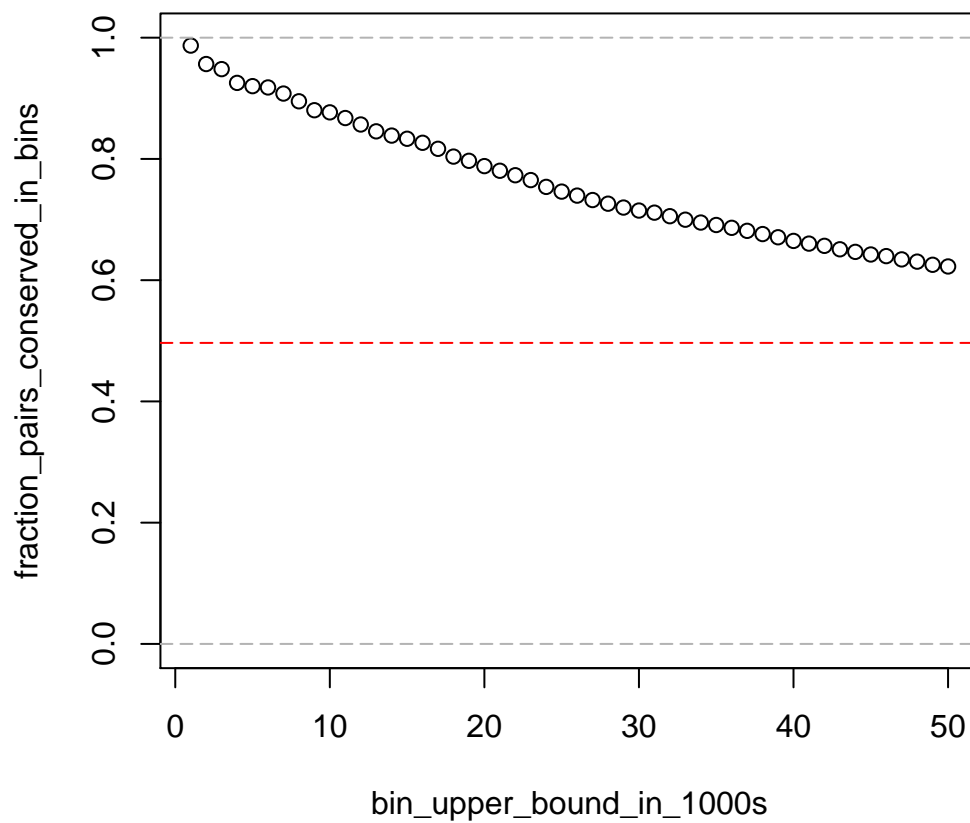

Supplement: s1 [file s1]

**Bin\_conservation\_minus\_bg\_MA-1D\_vs\_MO0605SPH**  
**PD-0.704354**

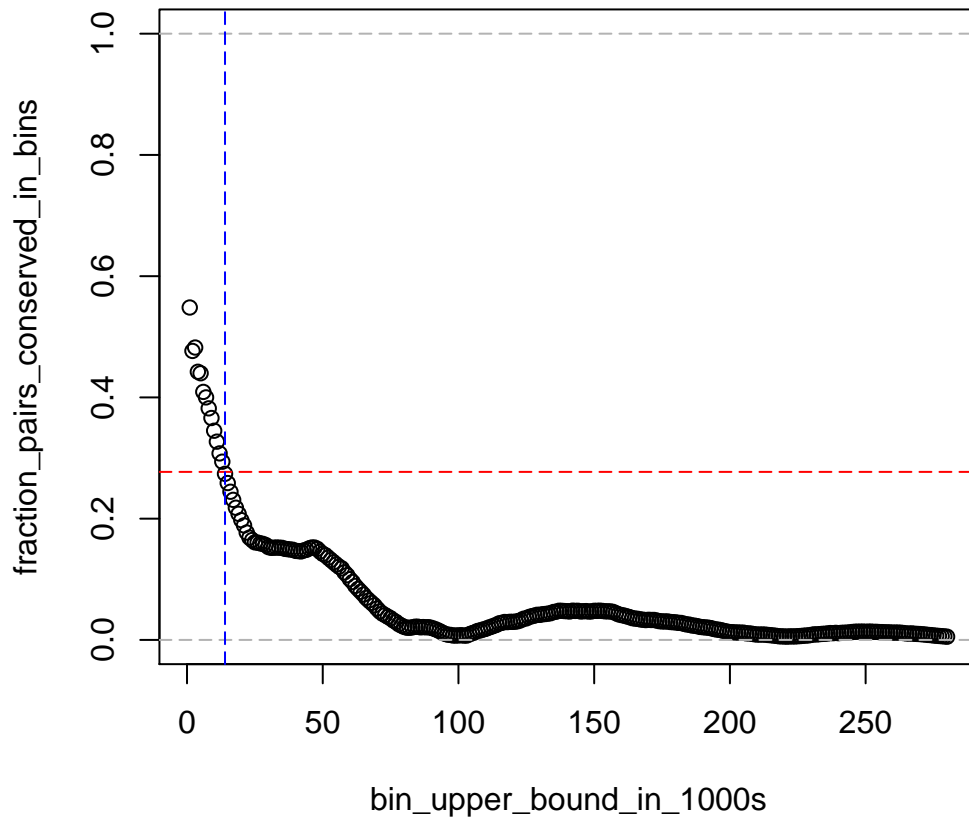

**Bin\_conservation\_minus\_bg\_MA-1D\_vs\_MO0605SPH**  
**PD-0.704354**

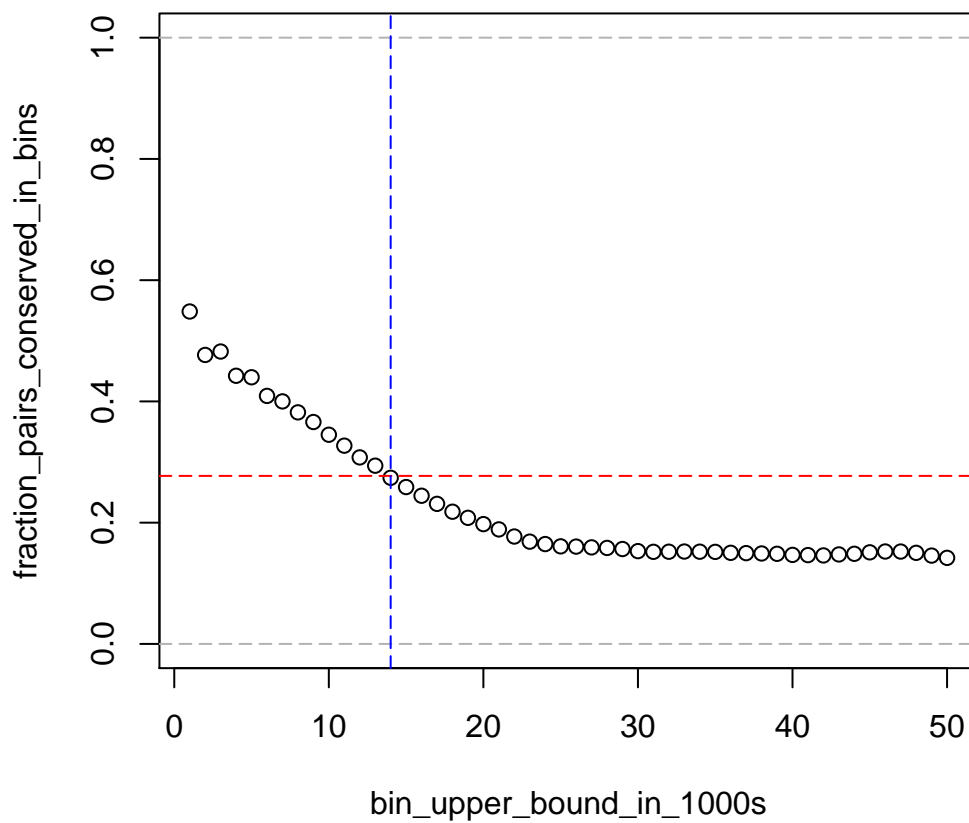

Supplement: s1 [file s1]

**Bin\_conservation\_minus\_bg\_AR158\_vs\_NYs-1**  
**PD-0.004488**

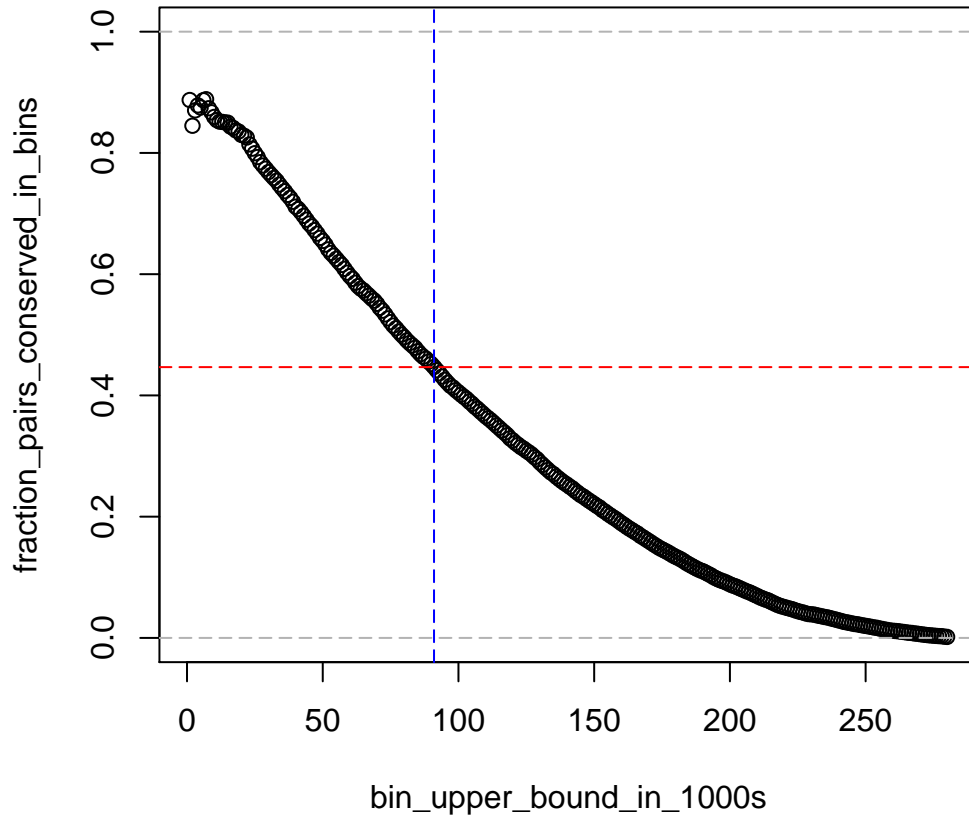

**Bin\_conservation\_minus\_bg\_AR158\_vs\_NYs-1**  
**PD-0.004488**

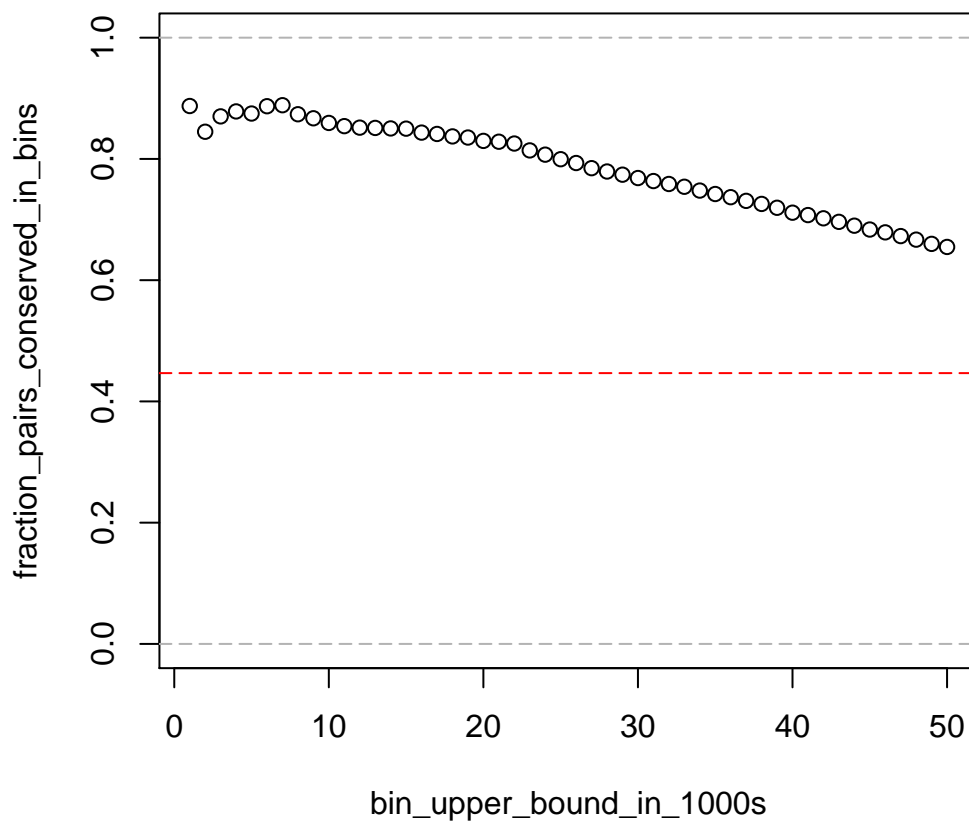

Supplement: s1 [file s1]

**Bin\_conservation\_minus\_bg\_FR483\_vs\_WI0606**  
**PD-0.469106**

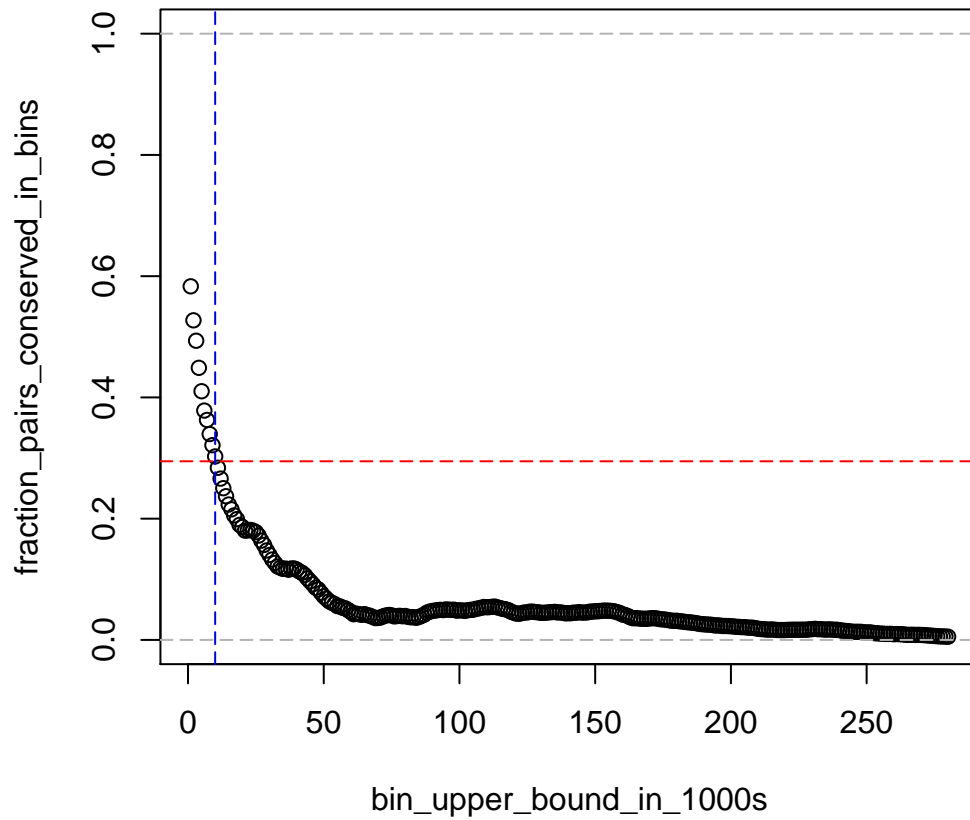

**Bin\_conservation\_minus\_bg\_FR483\_vs\_WI0606**  
**PD-0.469106**

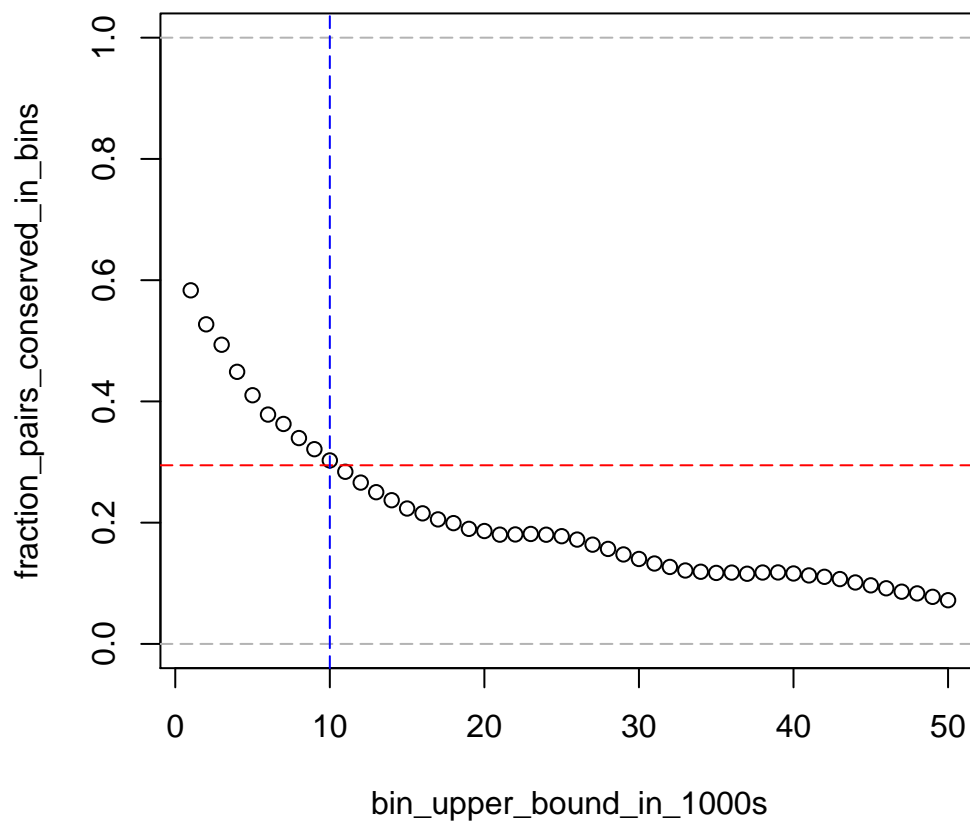

Supplement: s1 [file s1]

**Bin\_conservation\_minus\_bg\_Br0604L\_vs\_Can0610SP**  
**PD-0.061622**

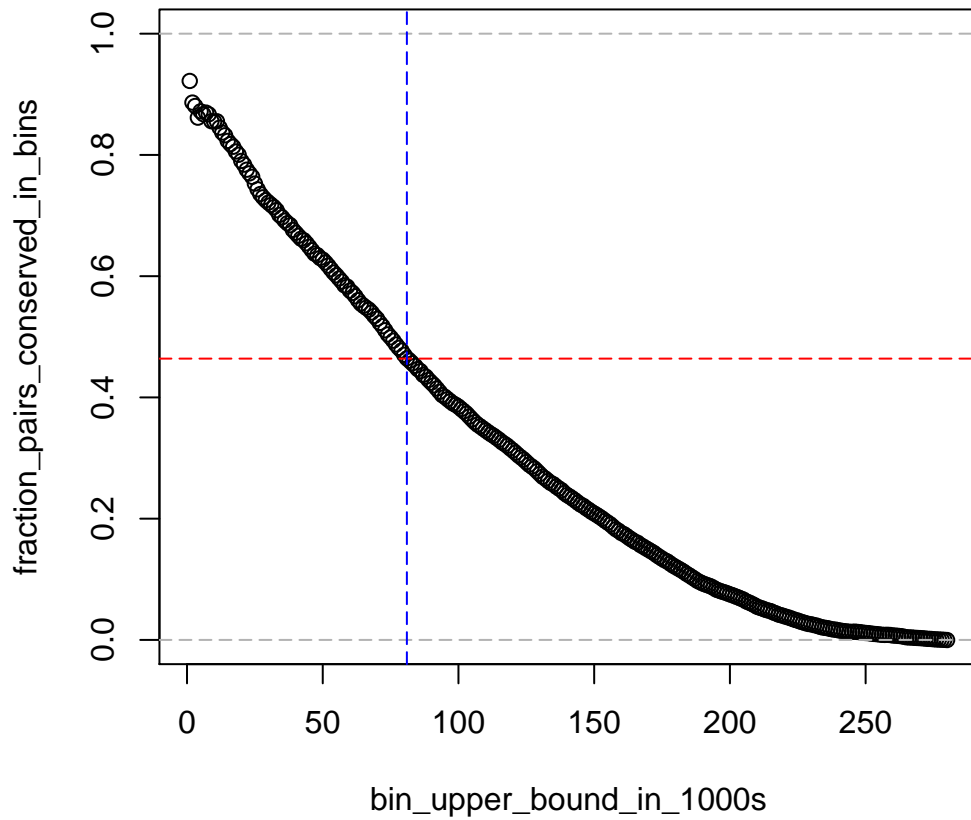

**Bin\_conservation\_minus\_bg\_Br0604L\_vs\_Can0610SP**  
**PD-0.061622**

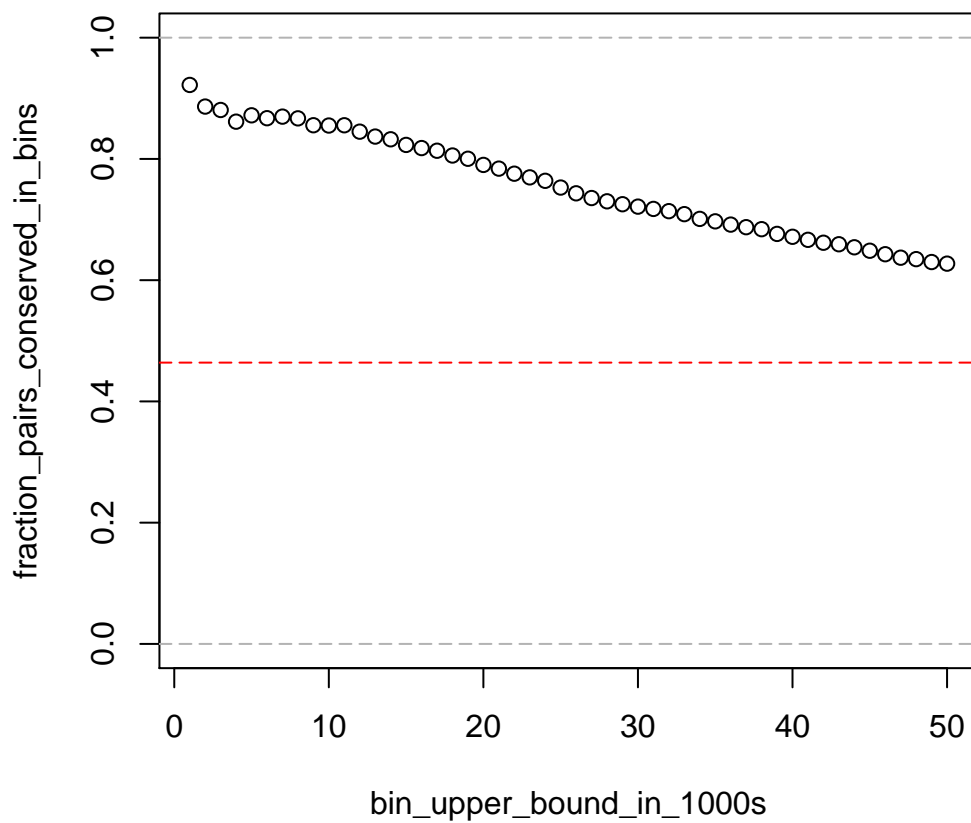

Supplement: s1 [file s1]

**Bin\_conservation\_minus\_bg\_AR158\_vs\_Fr5L**  
**PD-0.662537**

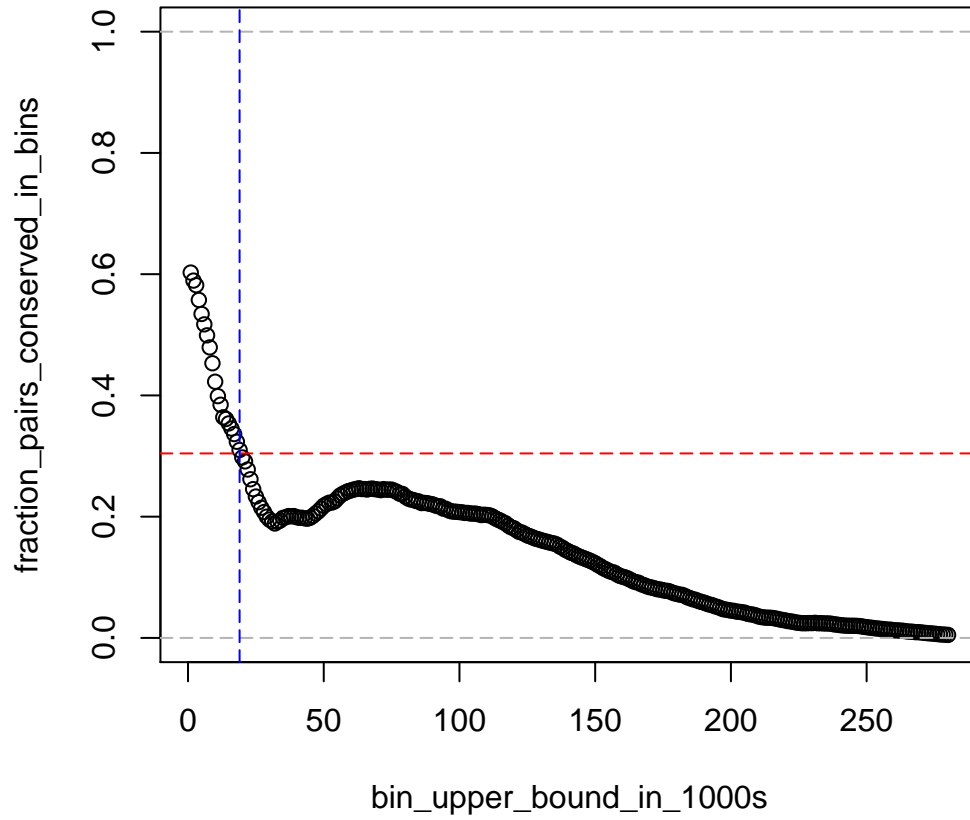

**Bin\_conservation\_minus\_bg\_AR158\_vs\_Fr5L**  
**PD-0.662537**

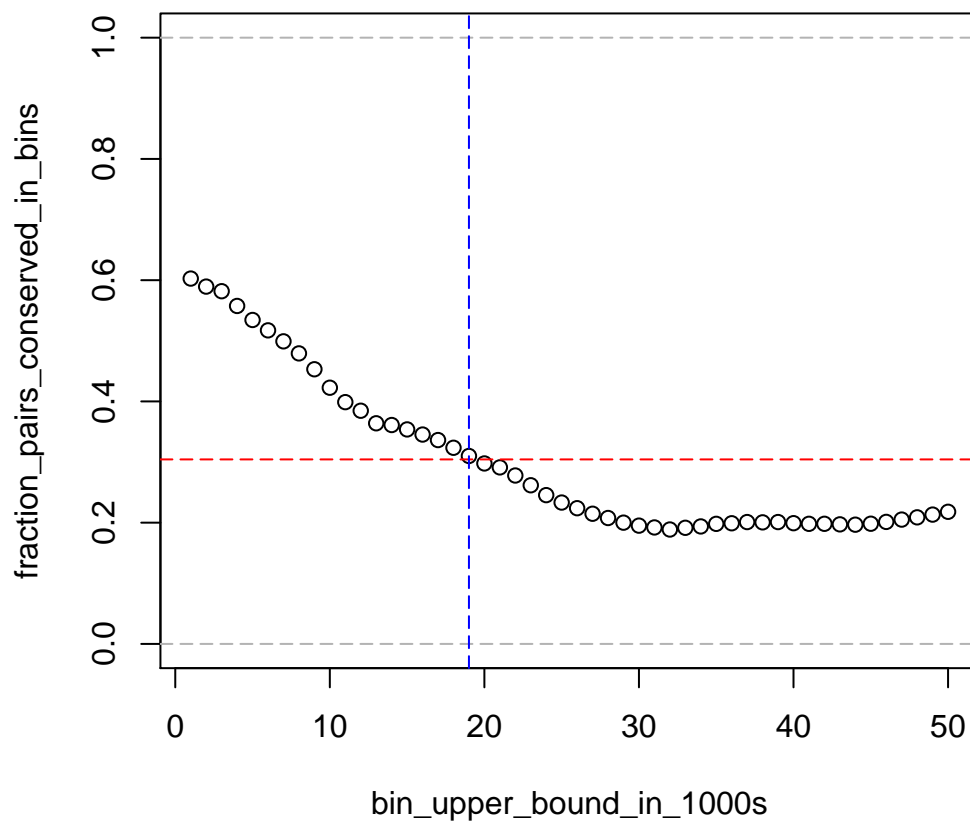

Supplement: s1 [file s1]

**Bin\_conservation\_minus\_bg\_NE-JV-3\_vs\_NYs-1**  
**PD-0.703239**

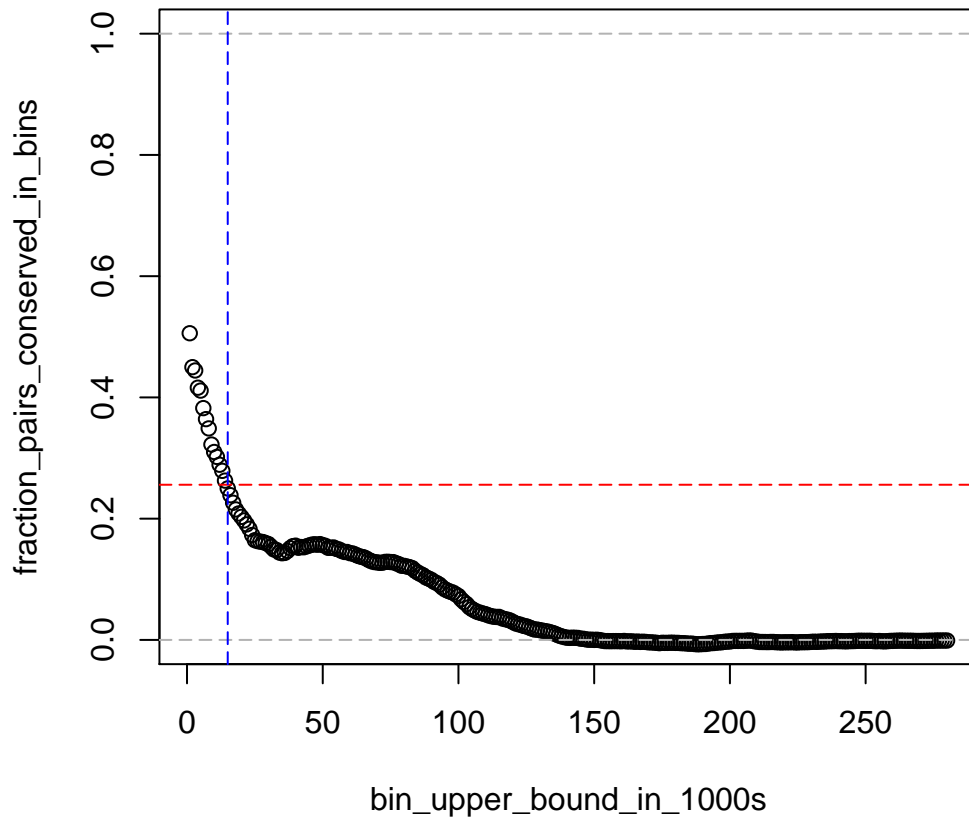

**Bin\_conservation\_minus\_bg\_NE-JV-3\_vs\_NYs-1**  
**PD-0.703239**

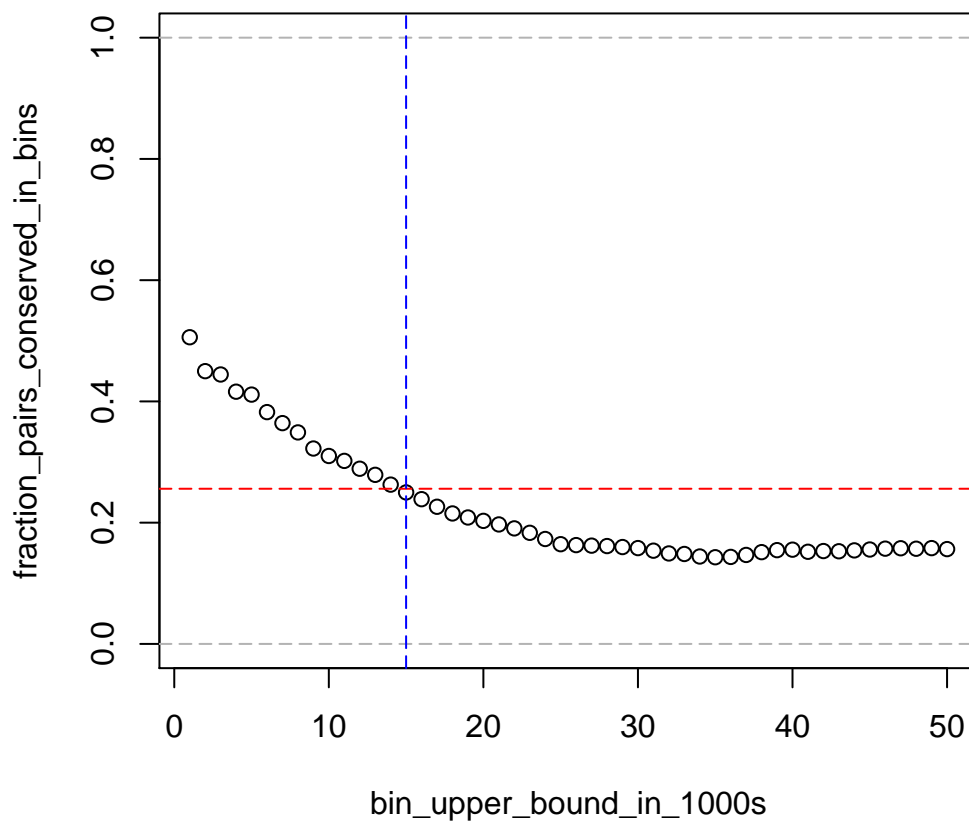

Supplement: s1 [file s1]

**Bin\_conservation\_minus\_bg\_CVB-1\_vs\_FR483**  
**PD-0.02728**

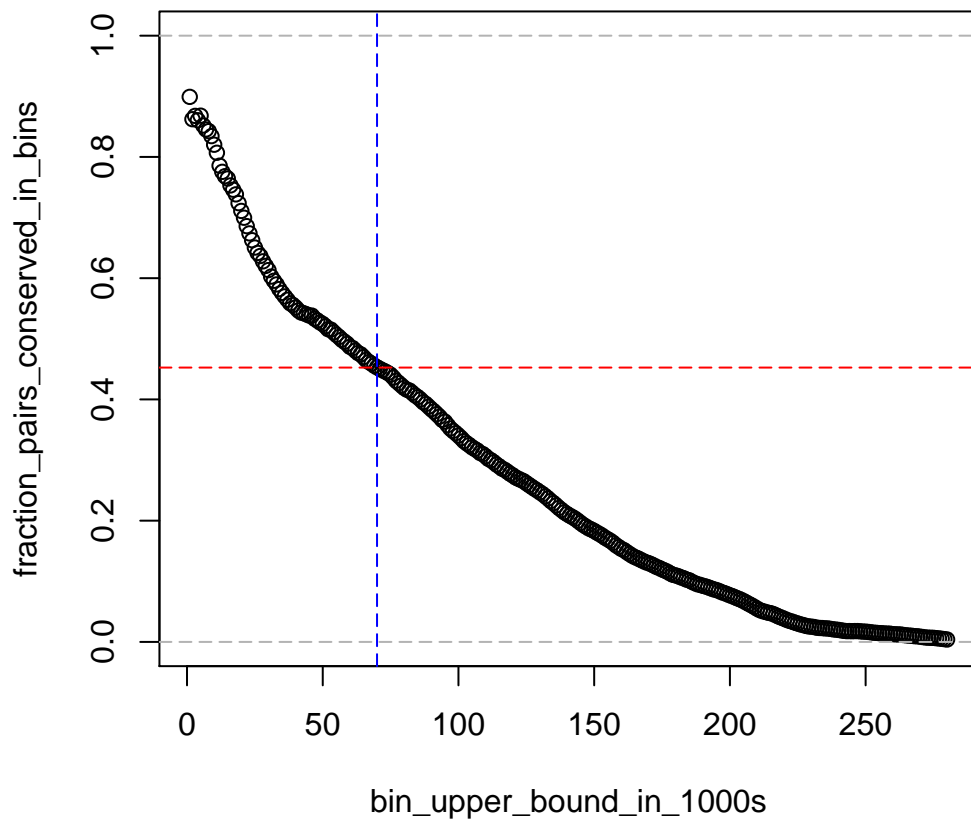

**Bin\_conservation\_minus\_bg\_CVB-1\_vs\_FR483**  
**PD-0.02728**

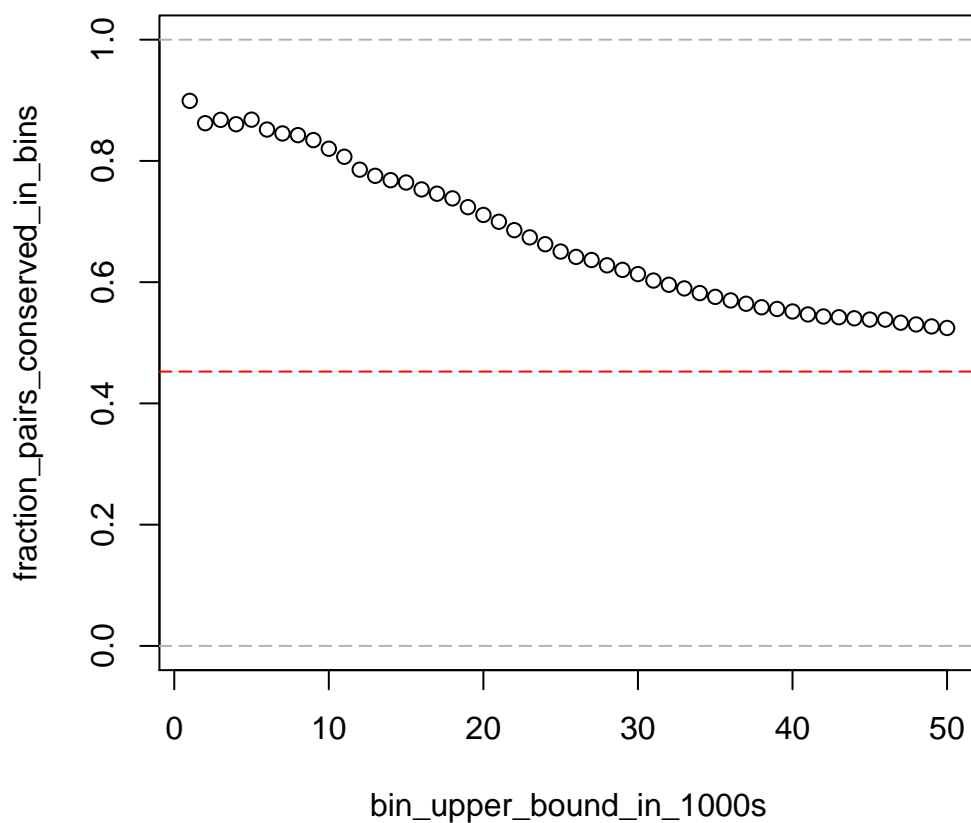

Supplement: s1 [file s1]

**Bin\_conservation\_minus\_bg\_IL-5-2s1\_vs\_OR0704.2.2**  
**PD-0.660662**

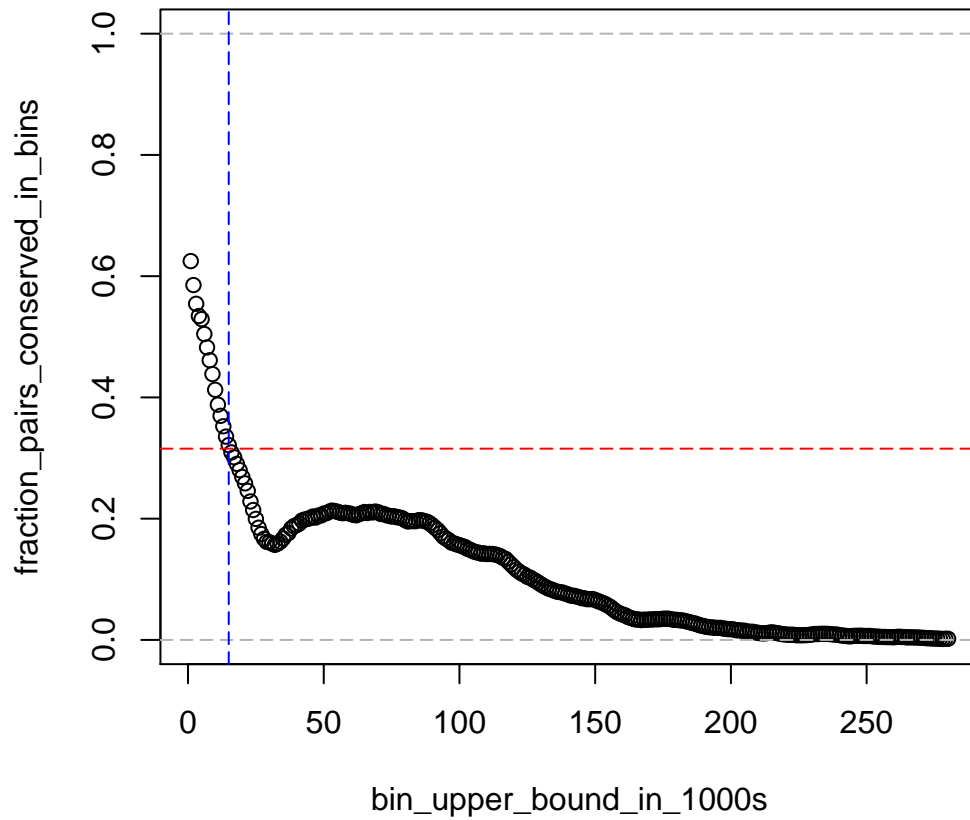

**Bin\_conservation\_minus\_bg\_IL-5-2s1\_vs\_OR0704.2.2**  
**PD-0.660662**

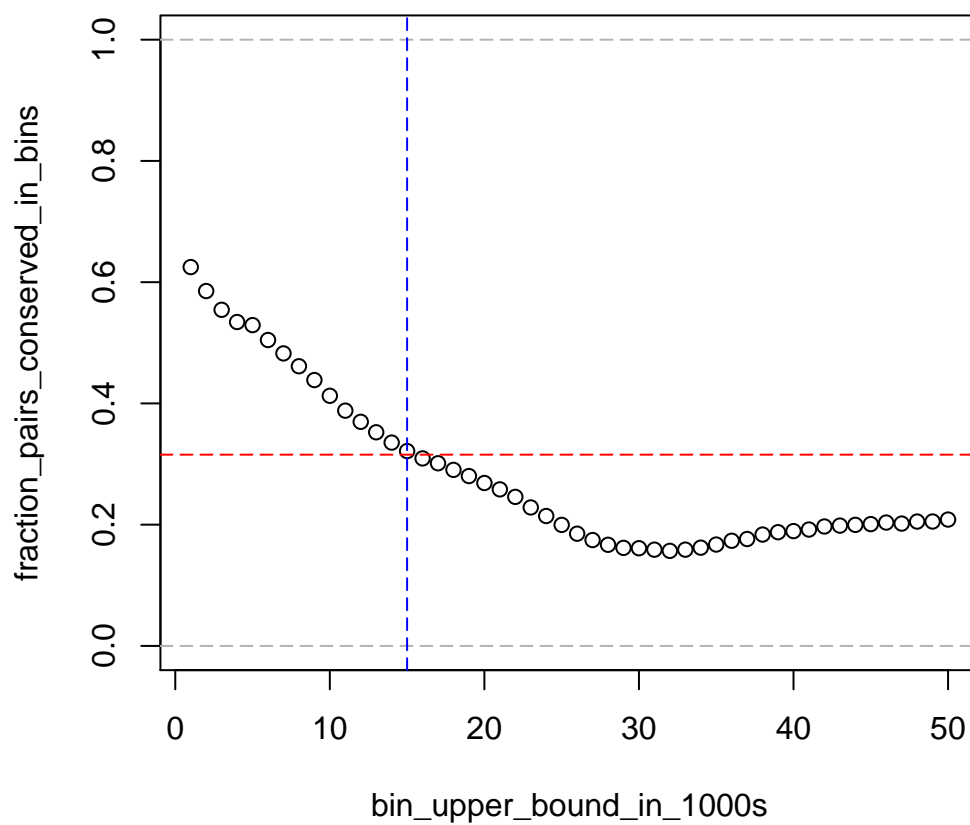

Supplement: s1 [file s1]

**Bin\_conservation\_minus\_bg\_MT325\_vs\_NE-JV-2**  
**PD-0.458967**

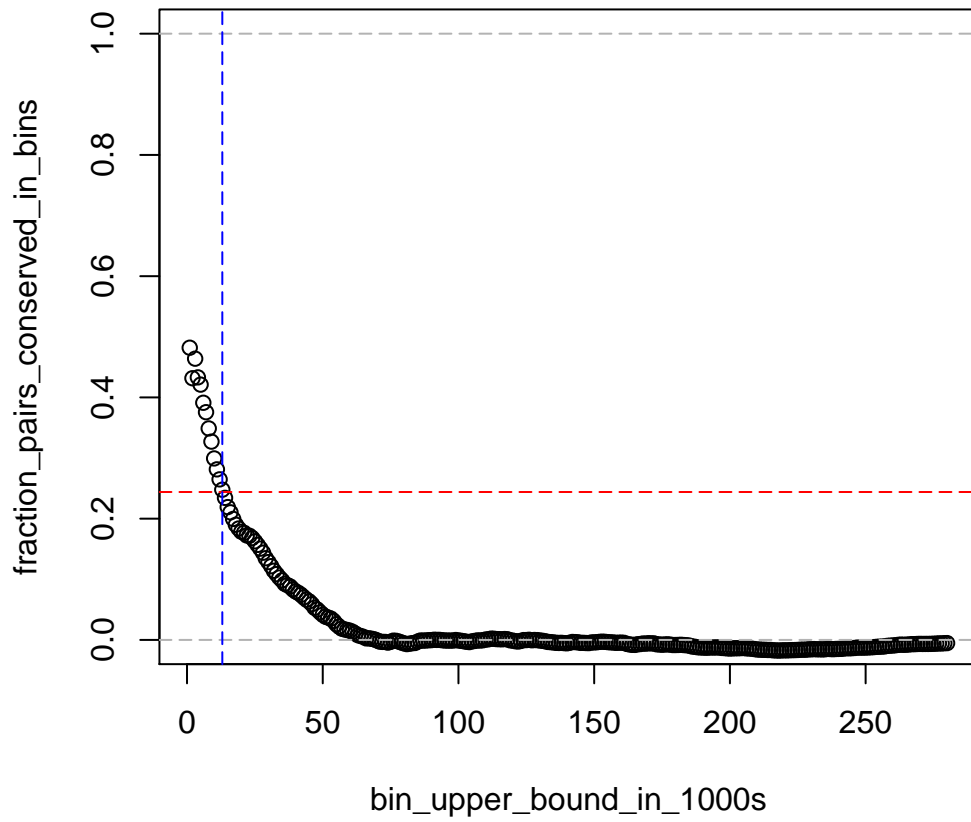

**Bin\_conservation\_minus\_bg\_MT325\_vs\_NE-JV-2**  
**PD-0.458967**

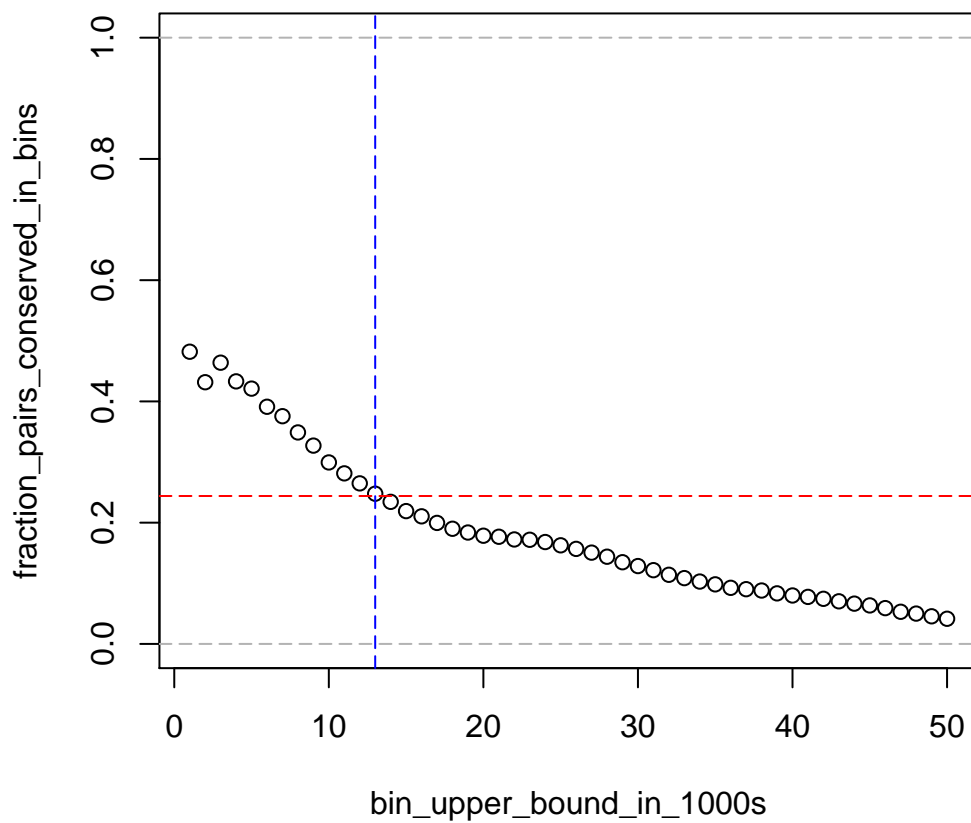

Supplement: s1 [file s1]

**Bin\_conservation\_minus\_bg\_Fr5L\_vs\_MT325**  
**PD-0.03482**

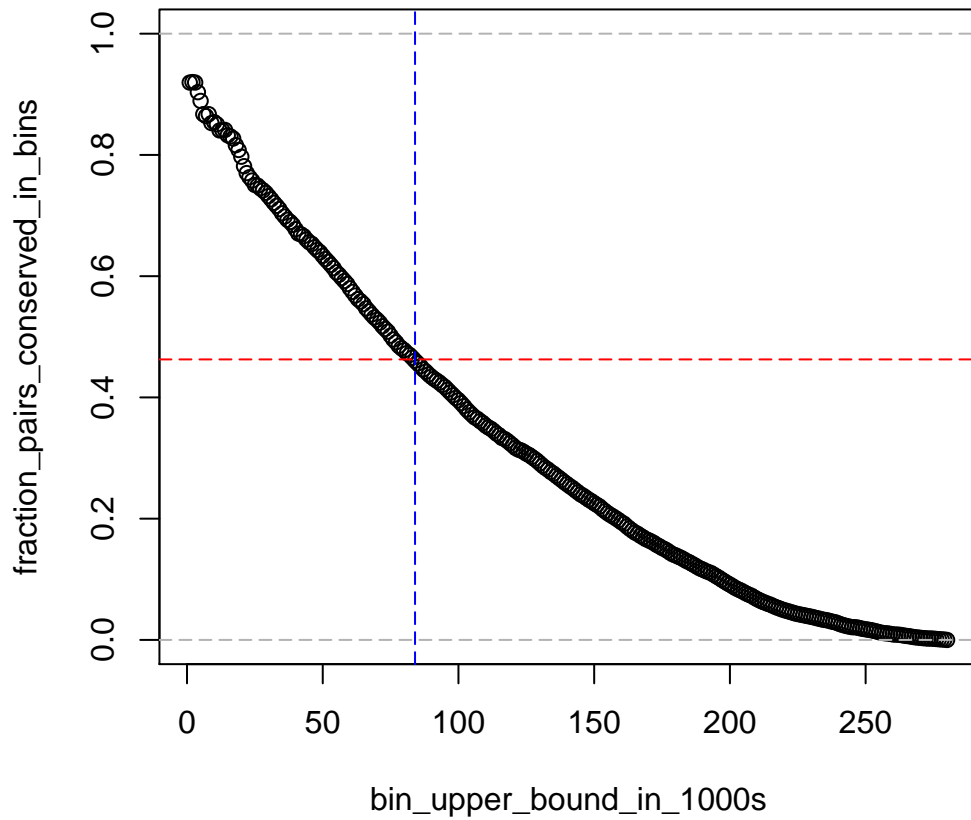

**Bin\_conservation\_minus\_bg\_Fr5L\_vs\_MT325**  
**PD-0.03482**

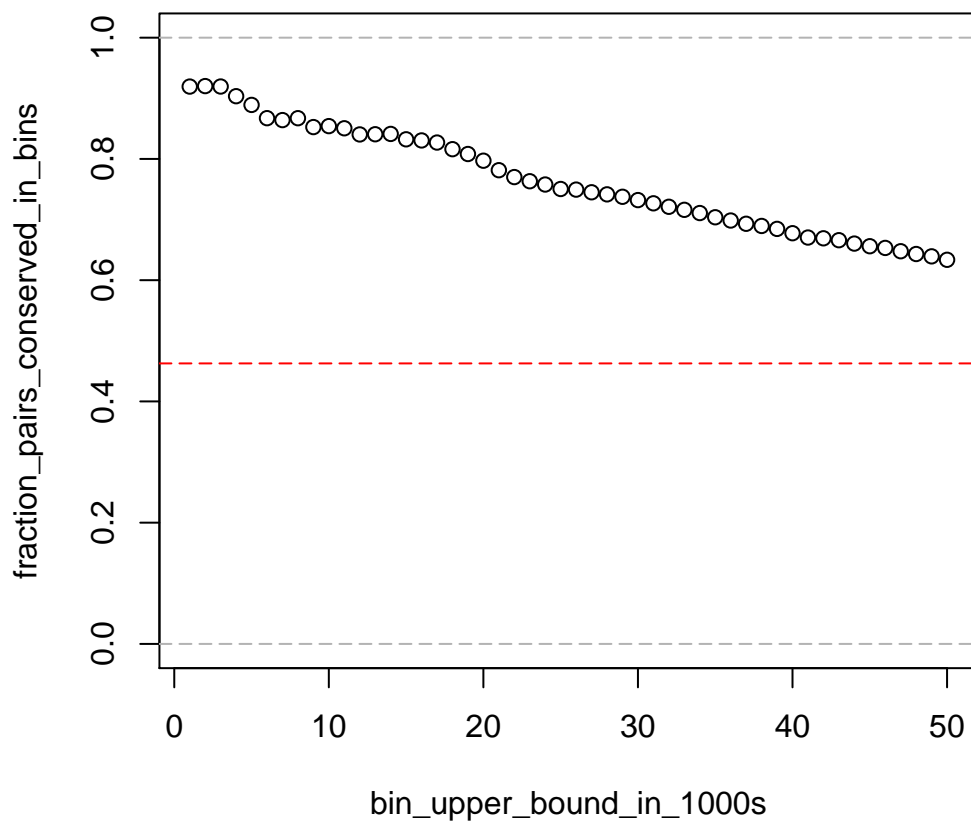

Supplement: s1 [file s1]

**Bin\_conservation\_minus\_bg\_NE-JV-2\_vs\_WI0606**  
**PD-0.015086**

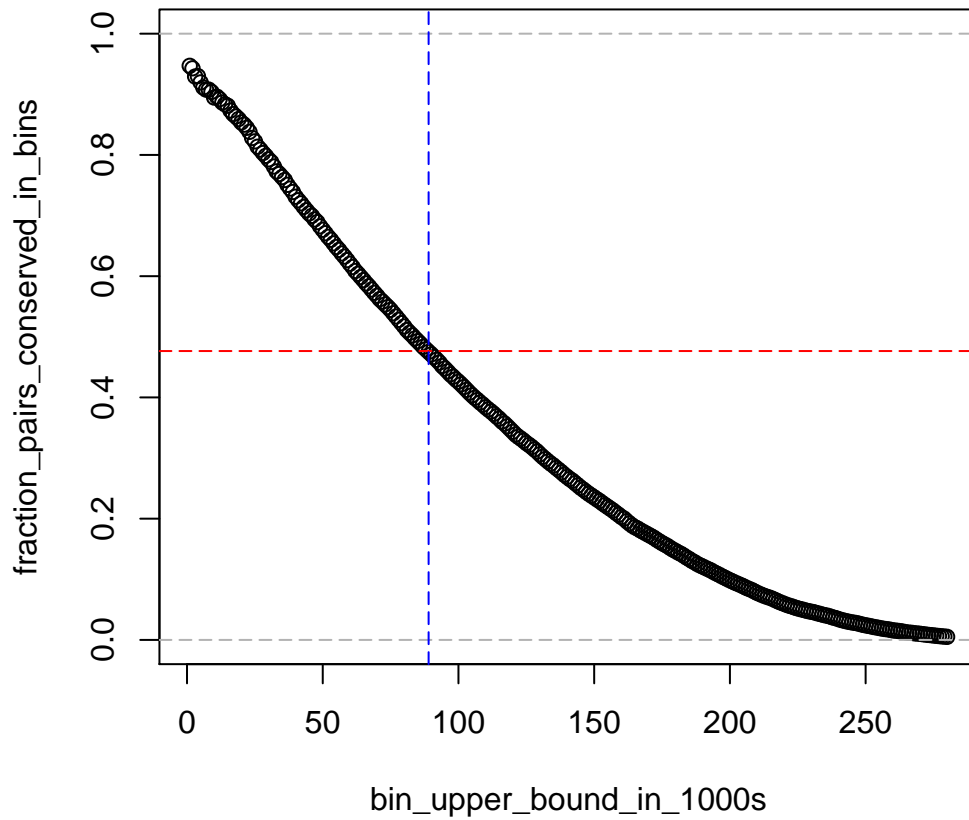

**Bin\_conservation\_minus\_bg\_NE-JV-2\_vs\_WI0606**  
**PD-0.015086**

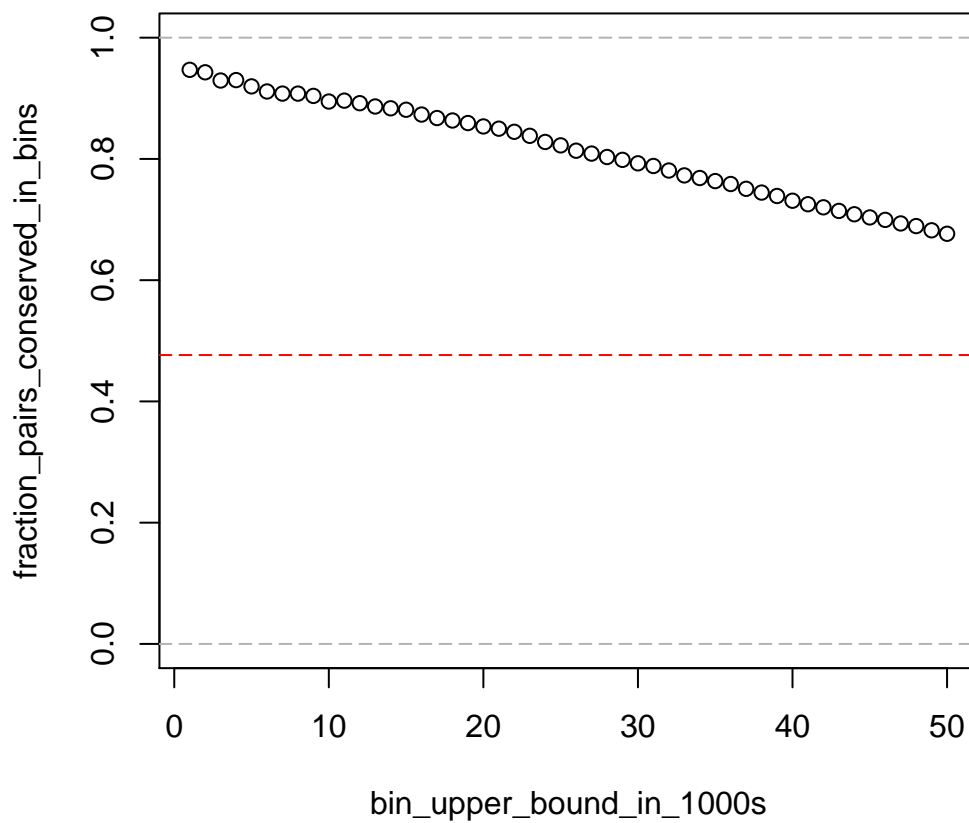

Supplement: s1 [file s1]

**Bin\_conservation\_minus\_bg\_IL-3A\_vs\_OR0704.2.2**  
**PD-0.63848**

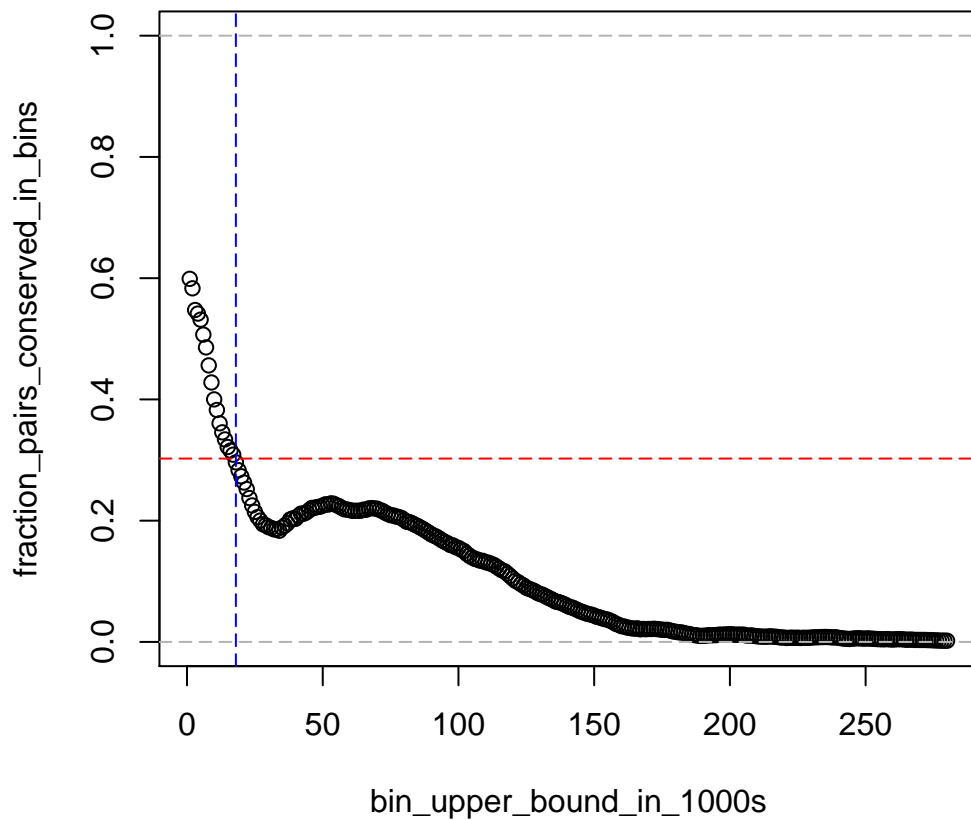

**Bin\_conservation\_minus\_bg\_IL-3A\_vs\_OR0704.2.2**  
**PD-0.63848**

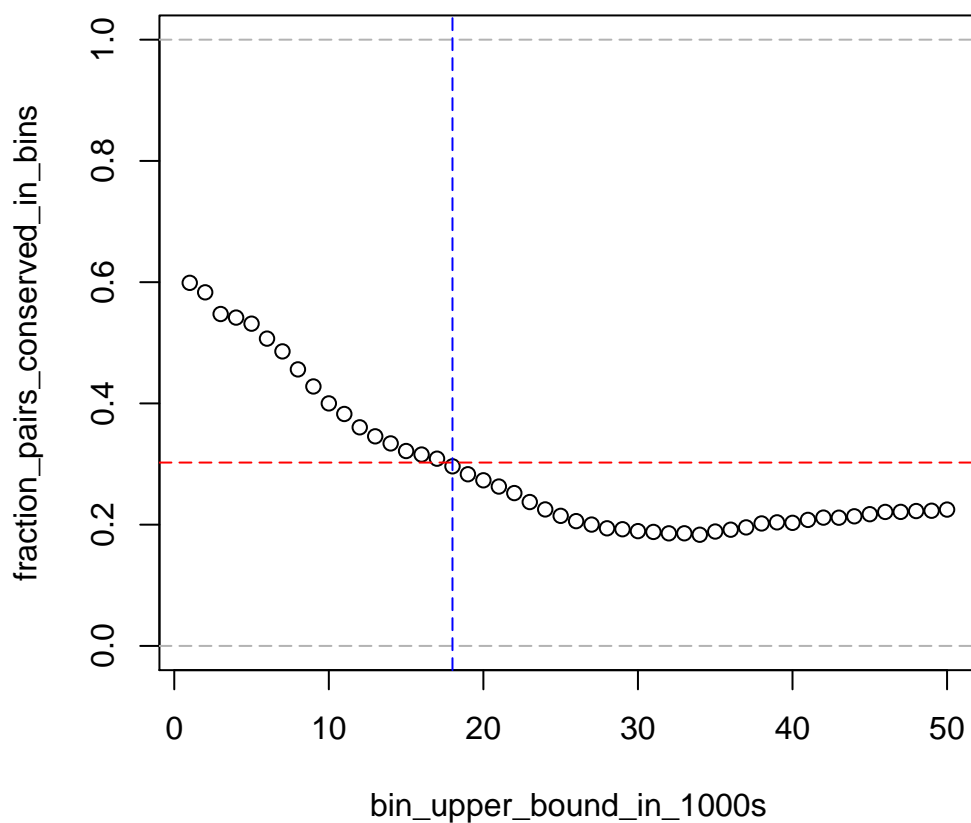

Supplement: s1 [file s1]

**Bin\_conservation\_minus\_bg\_Fr5L\_vs\_NE-JV-1**  
**PD-0.356638**

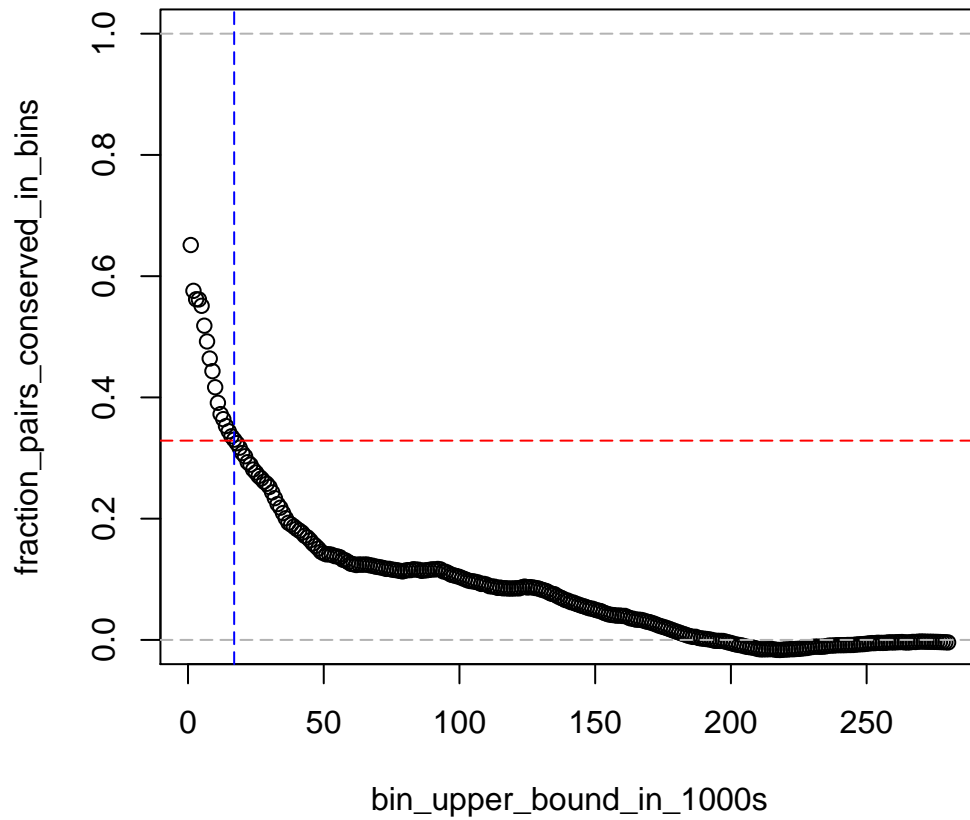

**Bin\_conservation\_minus\_bg\_Fr5L\_vs\_NE-JV-1**  
**PD-0.356638**

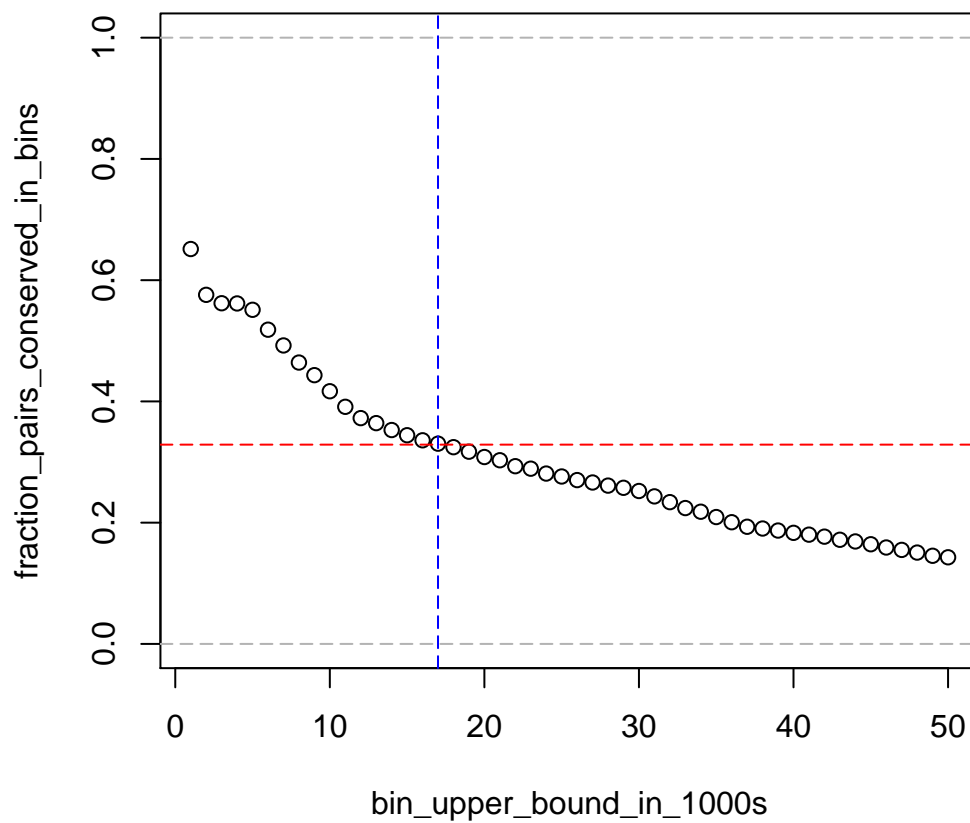

Supplement: s1 [file s1]

**Bin\_conservation\_minus\_bg\_NY-2B\_vs\_NYs-1**  
**PD-0.003794**

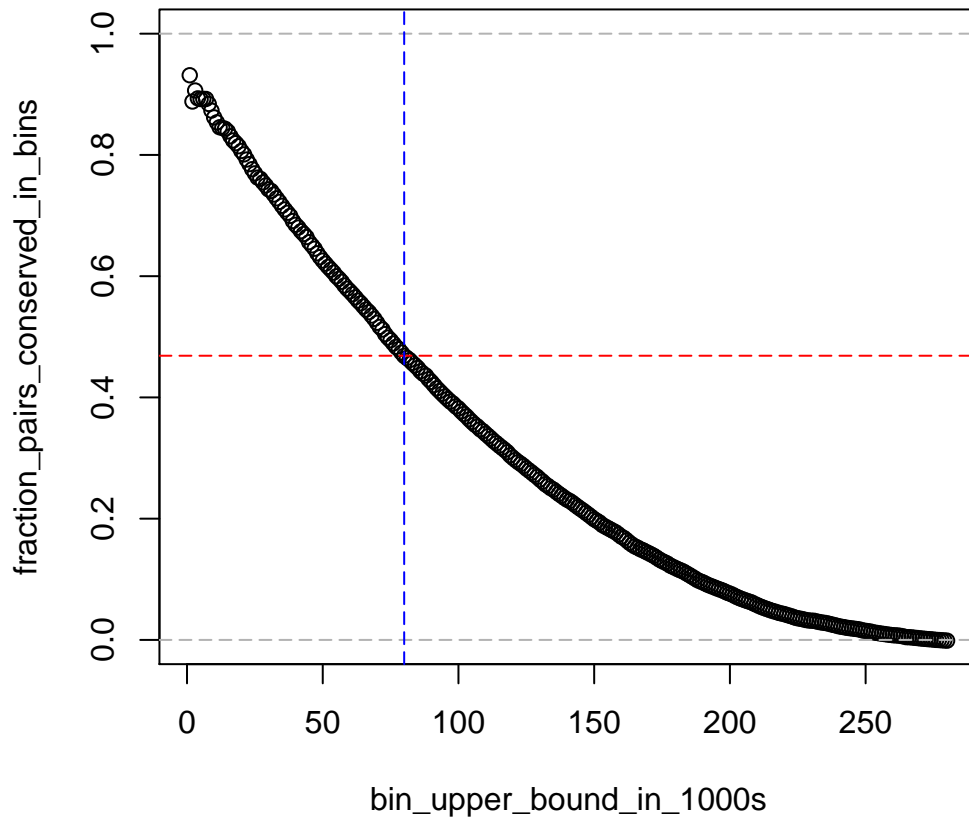

**Bin\_conservation\_minus\_bg\_NY-2B\_vs\_NYs-1**  
**PD-0.003794**

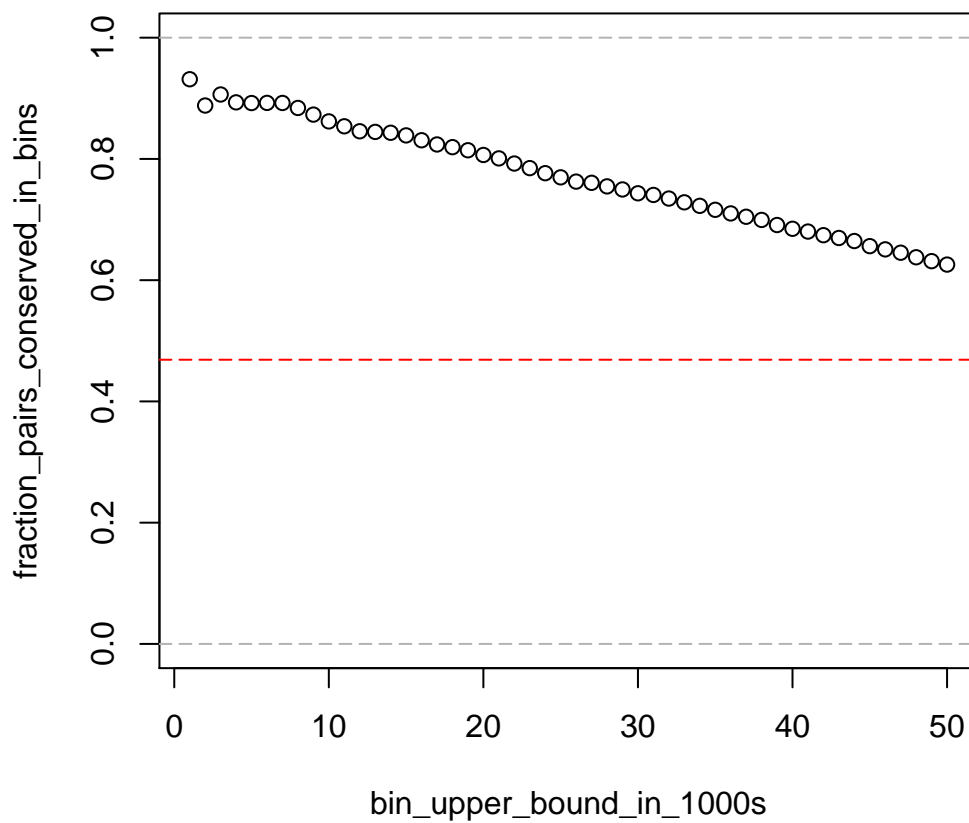

Supplement: s1 [file s1]

**Bin\_conservation\_minus\_bg\_NYs-1\_vs\_OR0704.2.2**  
**PD-0.659947**

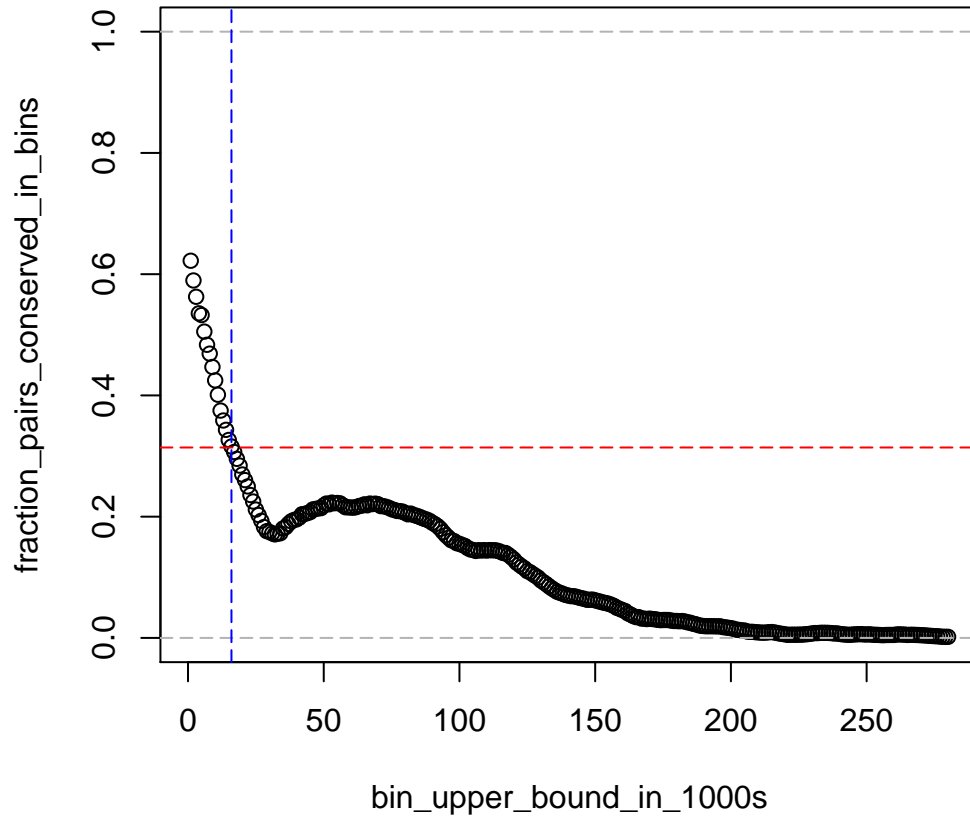

**Bin\_conservation\_minus\_bg\_NYs-1\_vs\_OR0704.2.2**  
**PD-0.659947**

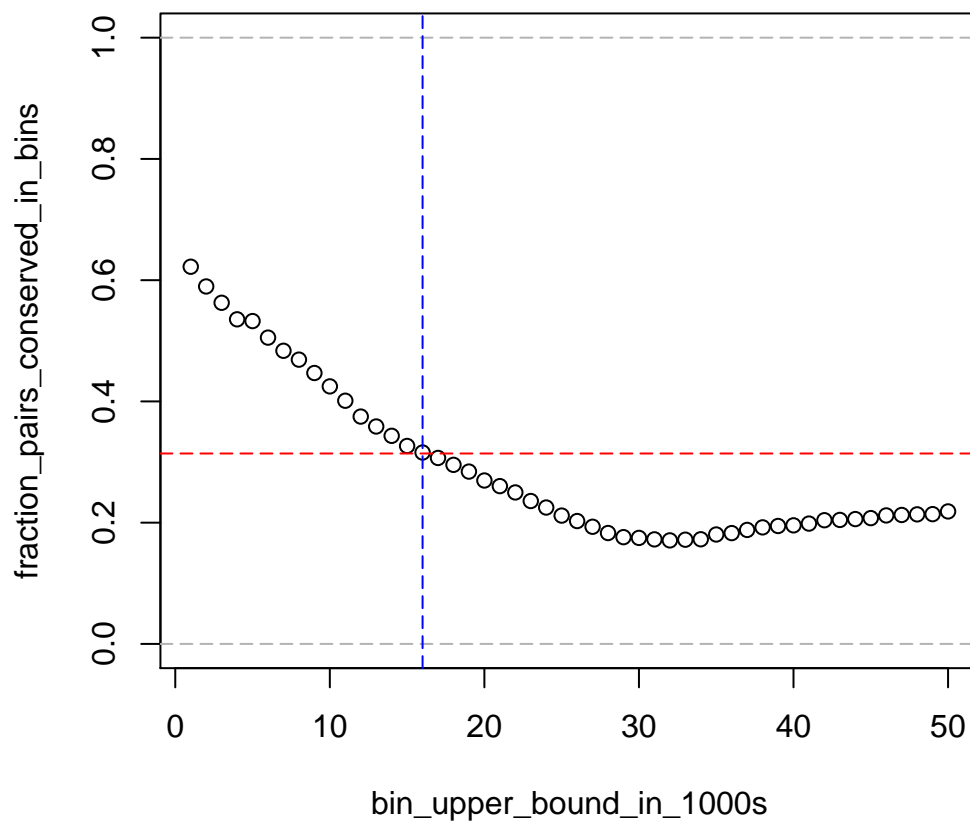

Supplement: s1 [file s1]

**Bin\_conservation\_minus\_bg\_ATCV1\_vs\_OR0704.3**  
**PD-0.019194**

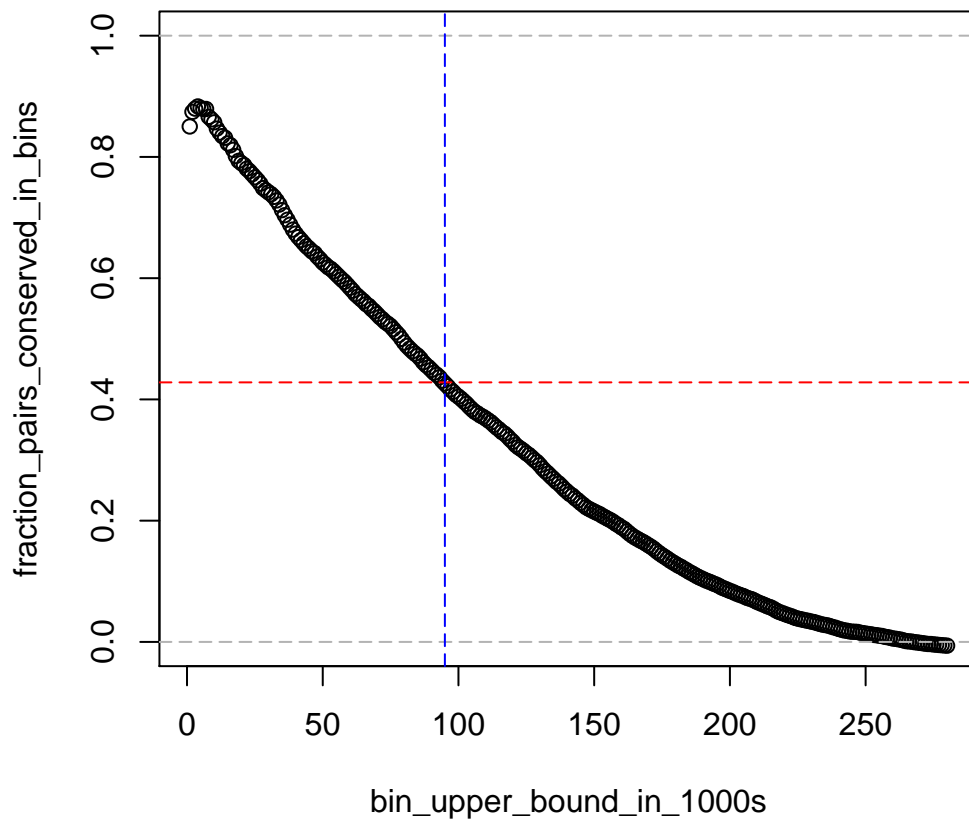

**Bin\_conservation\_minus\_bg\_ATCV1\_vs\_OR0704.3**  
**PD-0.019194**

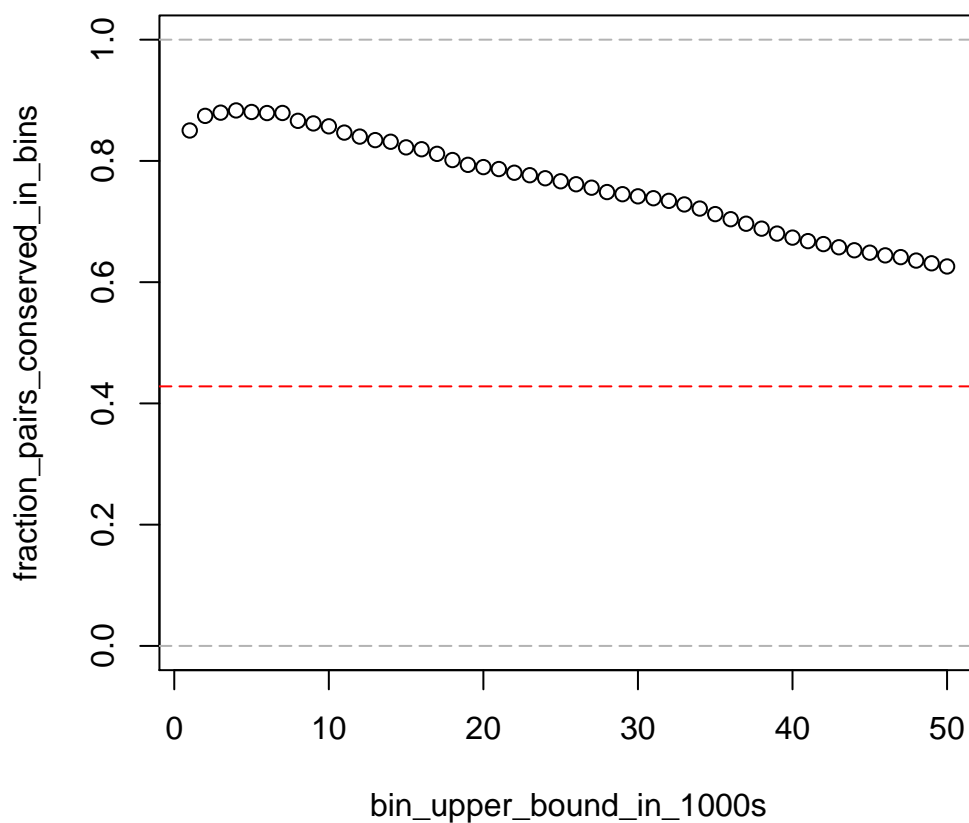

Supplement: s1 [file s1]

**Bin\_conservation\_minus\_bg\_CvsA1\_vs\_KS1B**  
**PD-0.018314**

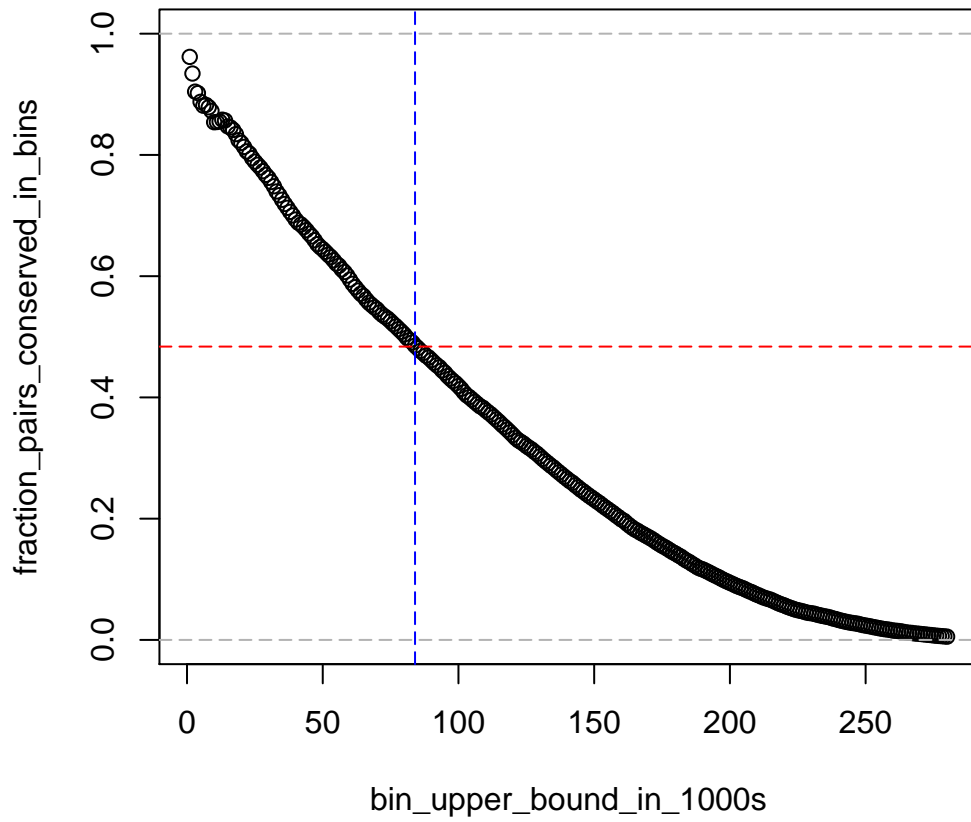

**Bin\_conservation\_minus\_bg\_CvsA1\_vs\_KS1B**  
**PD-0.018314**

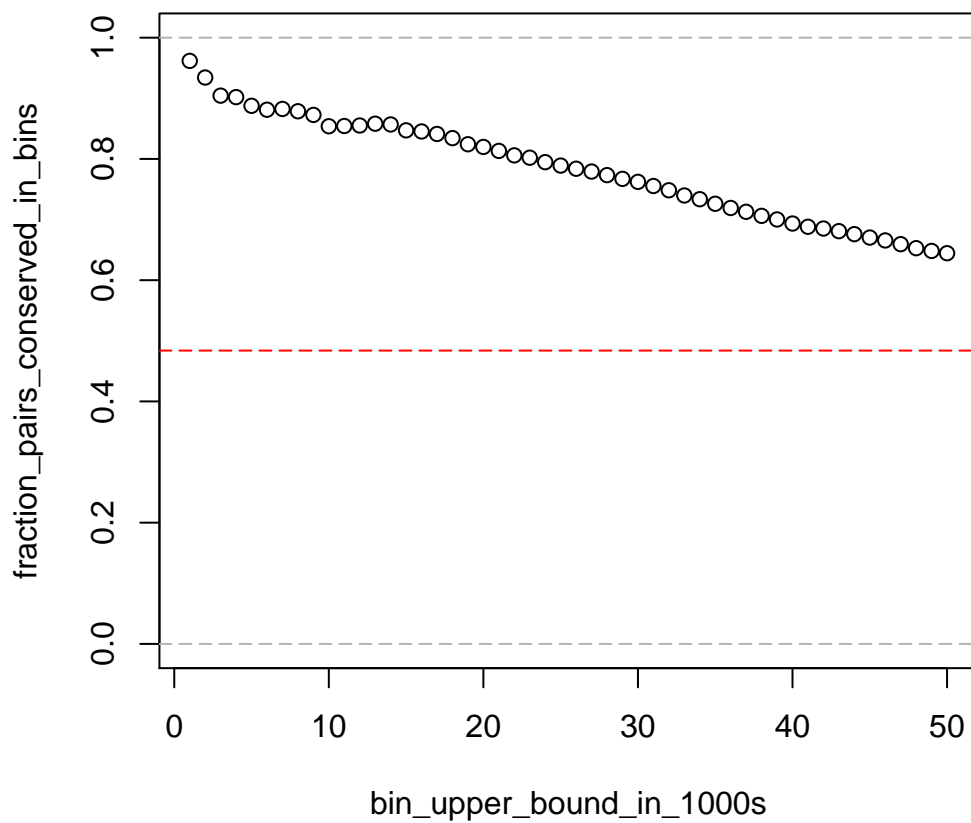

Supplement: s1 [file s1]

**Bin\_conservation\_minus\_bg\_AN69C\_vs\_KS1B**  
**PD-0.016331**

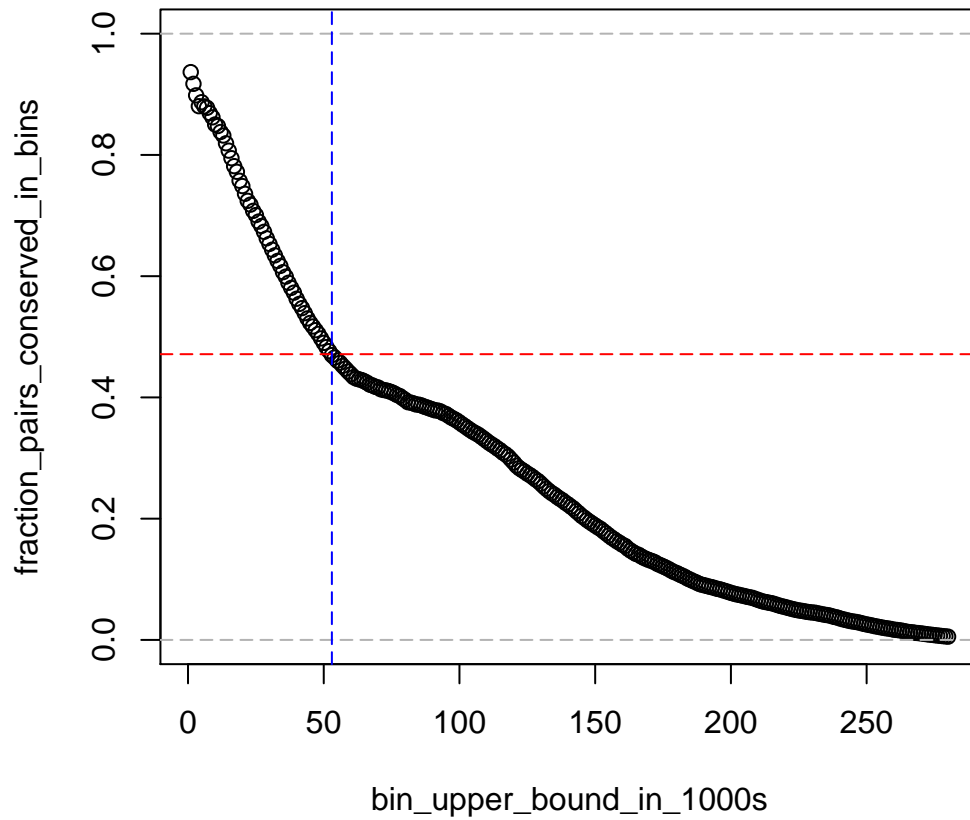

**Bin\_conservation\_minus\_bg\_AN69C\_vs\_KS1B**  
**PD-0.016331**

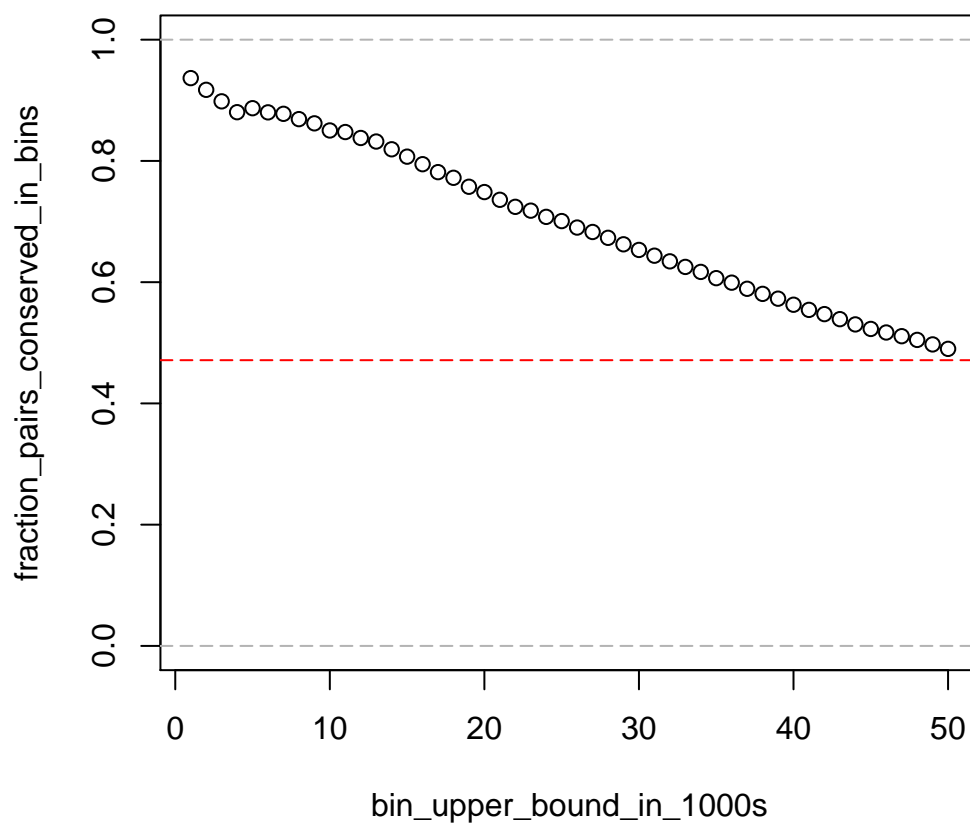

Supplement: s1 [file s1]

**Bin\_conservation\_minus\_bg\_IL-3A\_vs\_PBCV1**  
**PD-0.017631**

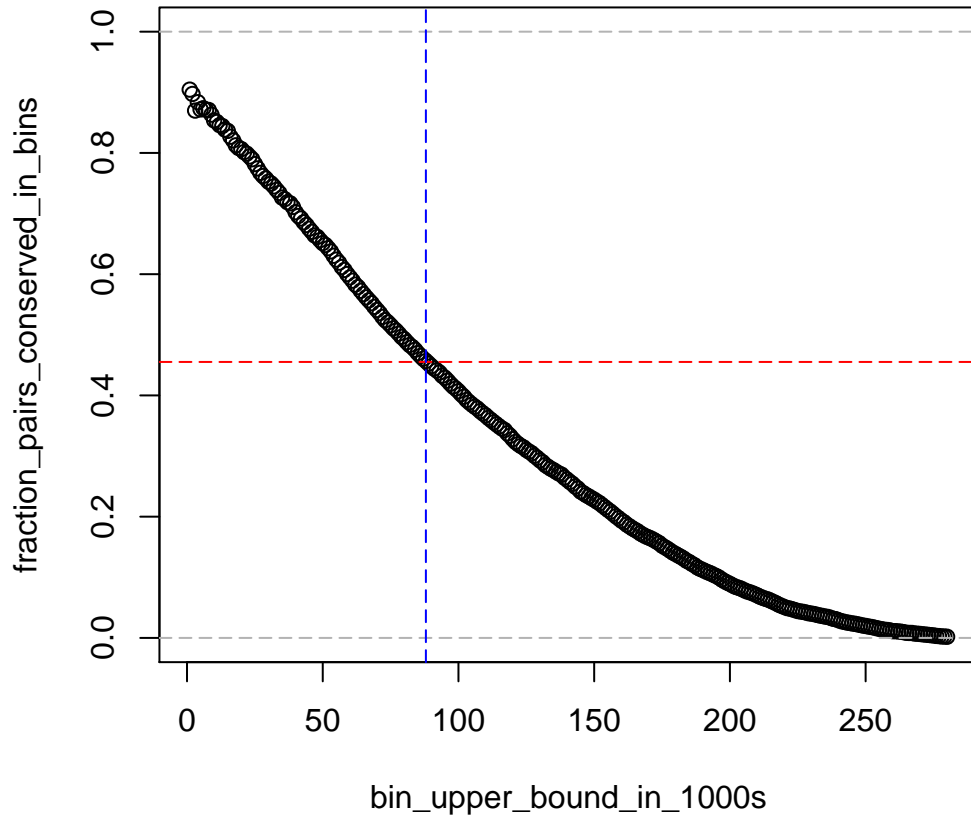

**Bin\_conservation\_minus\_bg\_IL-3A\_vs\_PBCV1**  
**PD-0.017631**

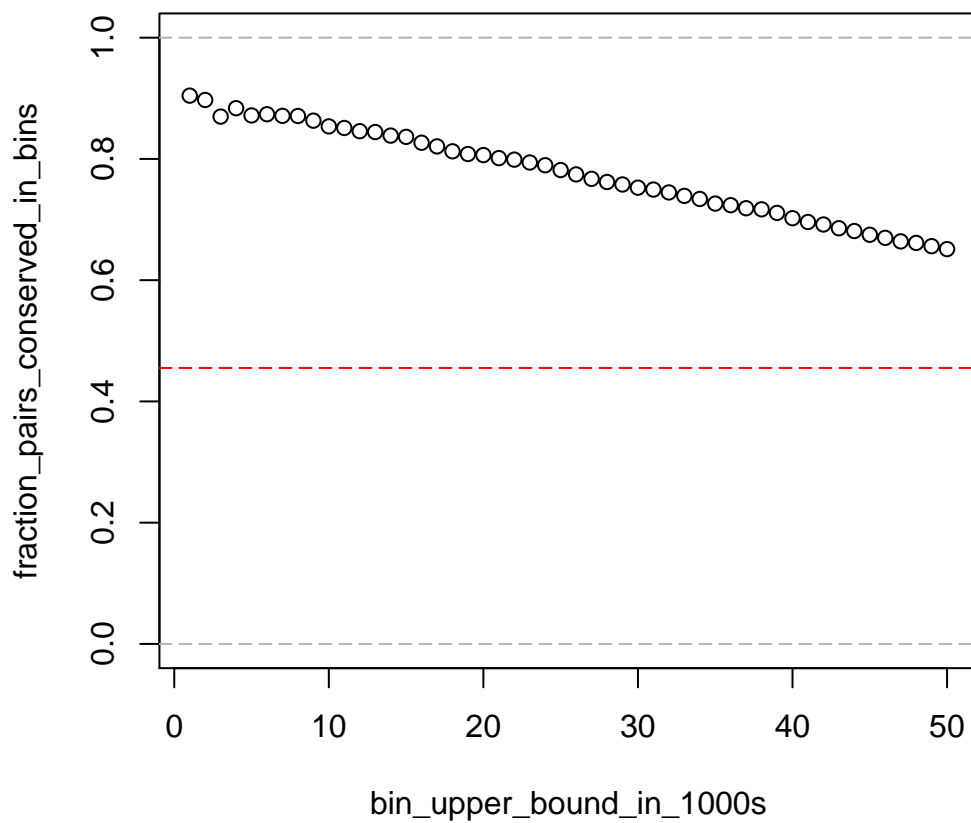

Supplement: s1 [file s1]

**Bin\_conservation\_minus\_bg\_CVG-1\_vs\_Fr5L**  
**PD-0.037634**

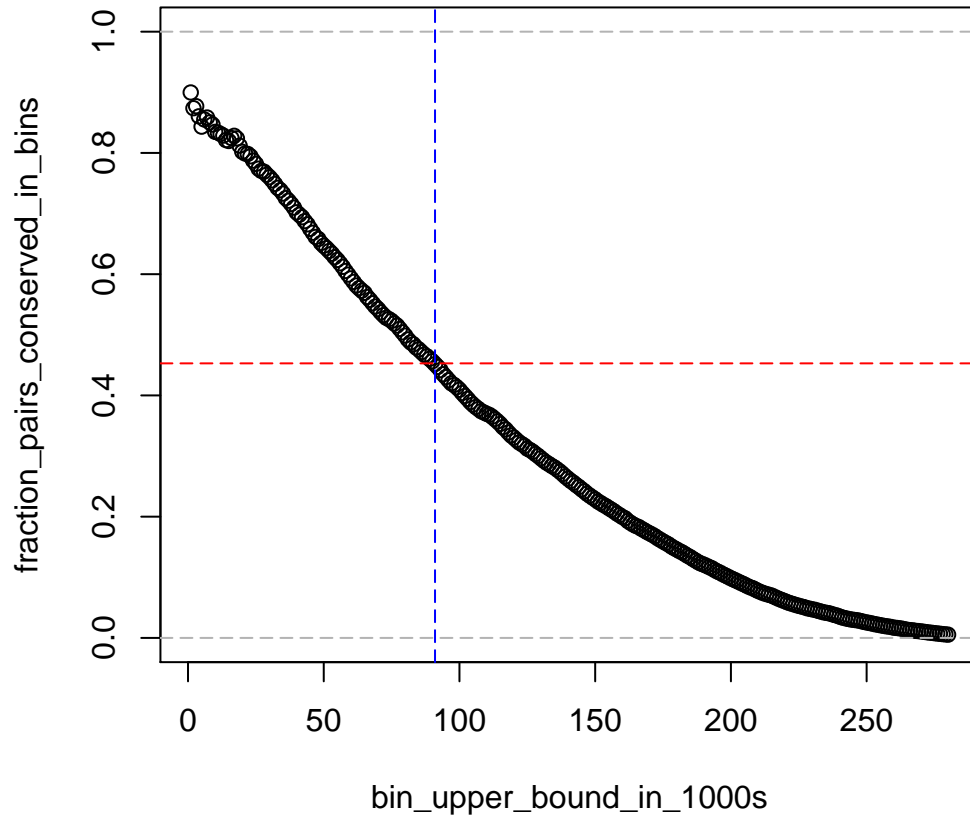

**Bin\_conservation\_minus\_bg\_CVG-1\_vs\_Fr5L**  
**PD-0.037634**

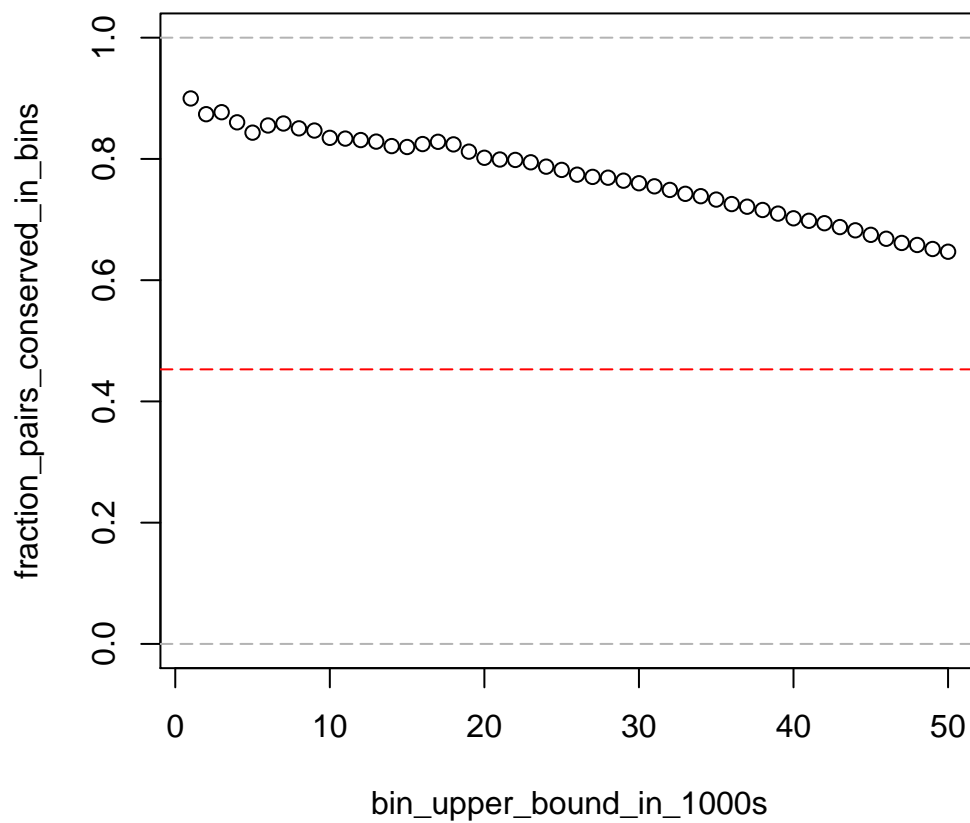

Supplement: s1 [file s1]

**Bin\_conservation\_minus\_bg\_ATCV1\_vs\_CvsA1**  
**PD-0.693978**

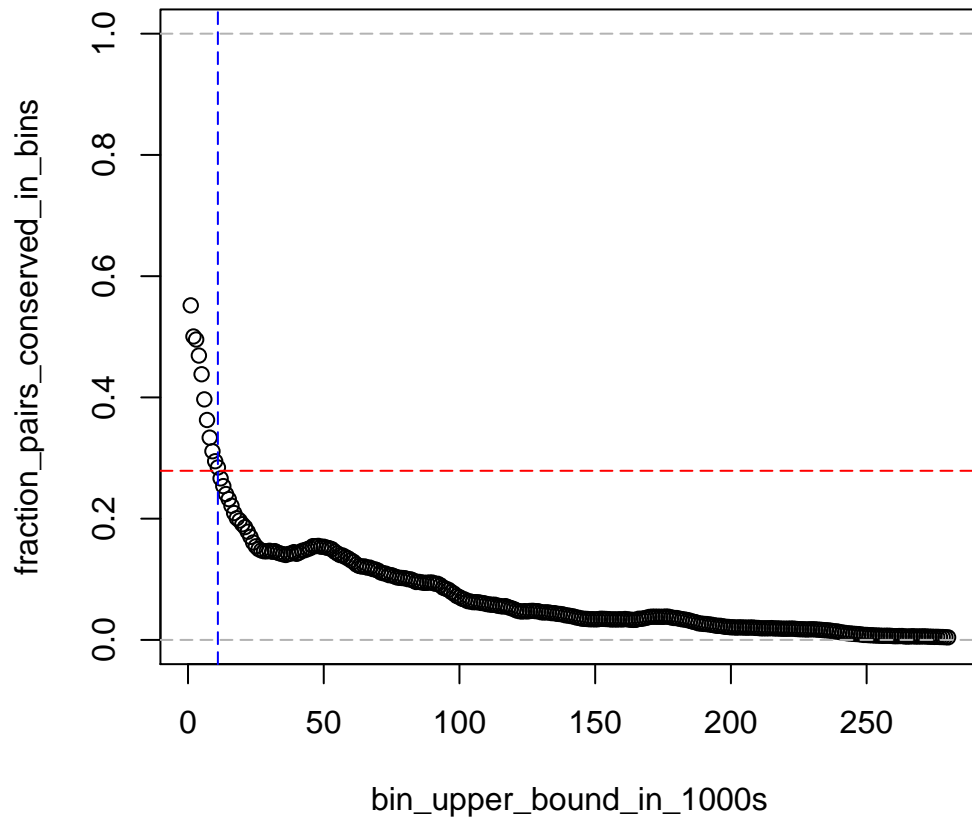

**Bin\_conservation\_minus\_bg\_ATCV1\_vs\_CvsA1**  
**PD-0.693978**

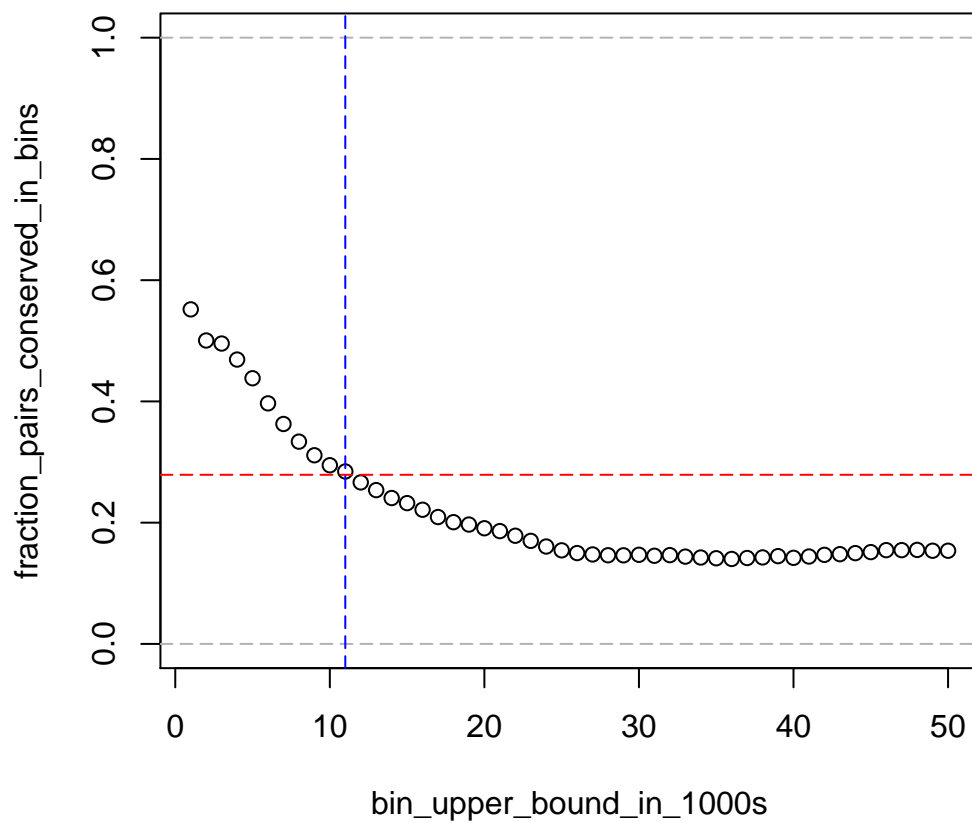

Supplement: s1 [file s1]

**Bin\_conservation\_minus\_bg\_AN69C\_vs\_Fr5L**  
**PD-0.635333**

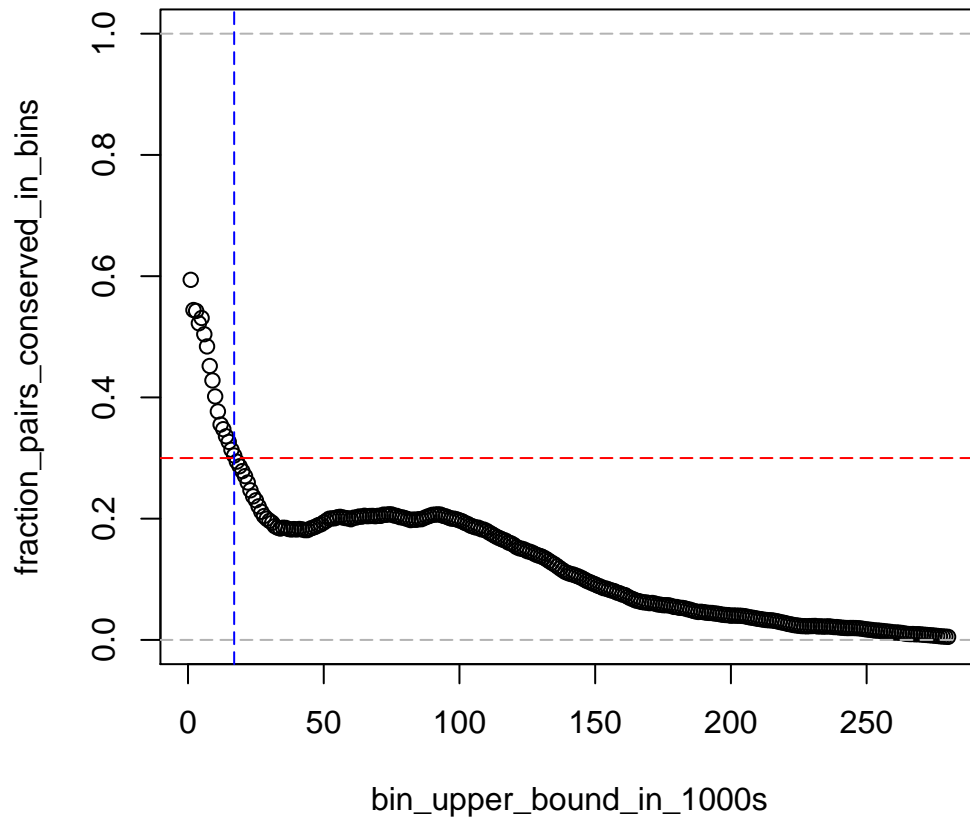

**Bin\_conservation\_minus\_bg\_AN69C\_vs\_Fr5L**  
**PD-0.635333**

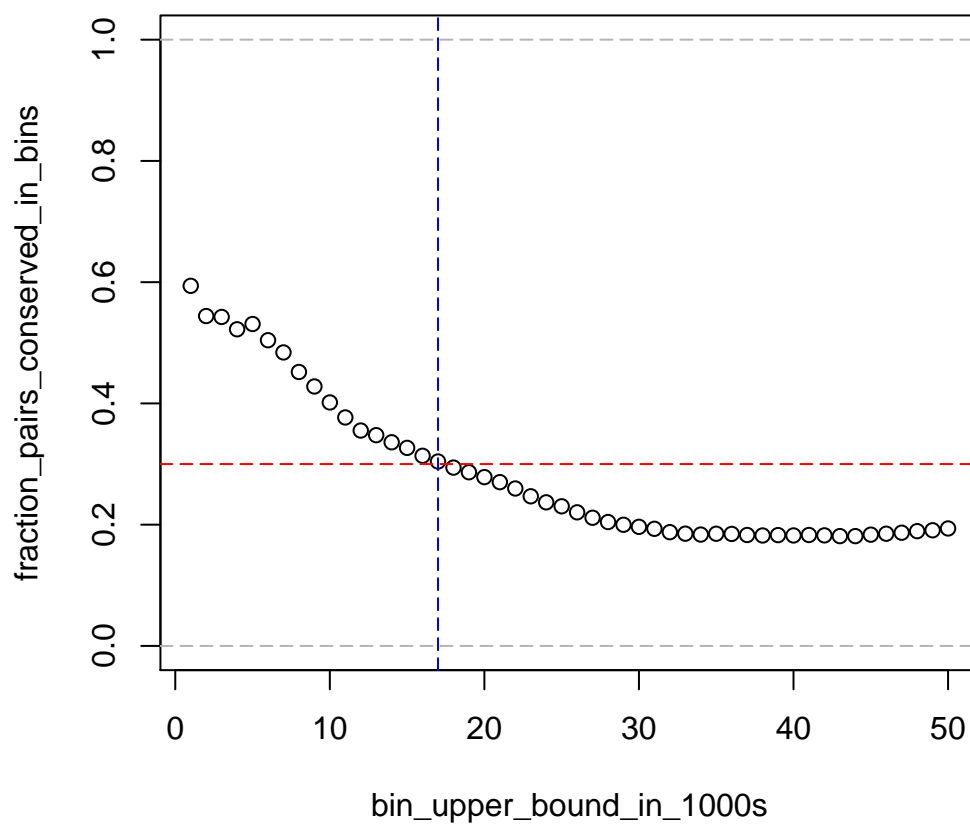

Supplement: s1 [file s1]

**Bin\_conservation\_minus\_bg\_FR483\_vs\_PBCV1**  
**PD-0.639748**

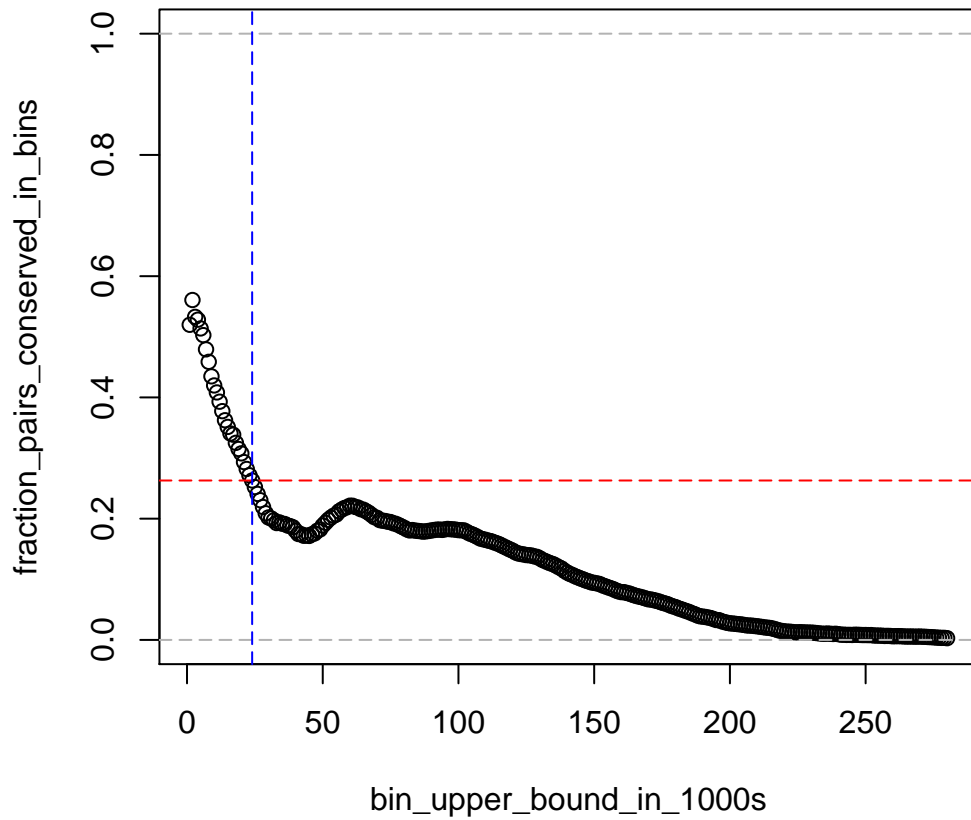

**Bin\_conservation\_minus\_bg\_FR483\_vs\_PBCV1**  
**PD-0.639748**

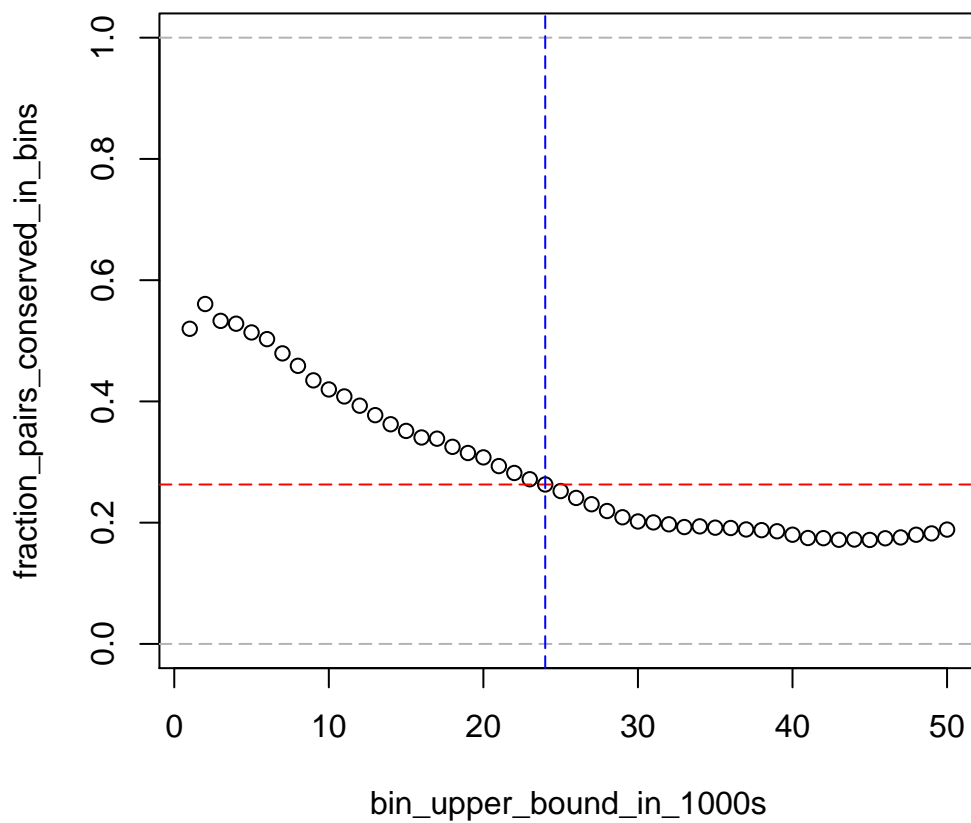

Supplement: s1 [file s1]

**Bin\_conservation\_minus\_bg\_CZ-2\_vs\_NE-JV-1**  
**PD-0.362445**

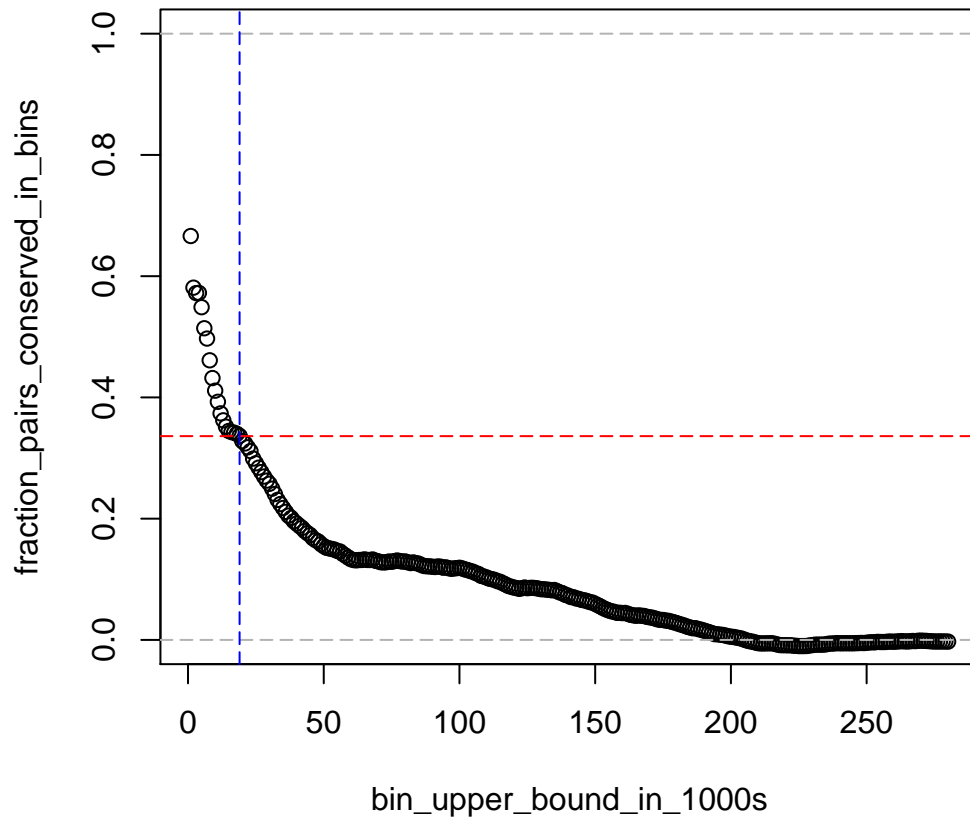

**Bin\_conservation\_minus\_bg\_CZ-2\_vs\_NE-JV-1**  
**PD-0.362445**

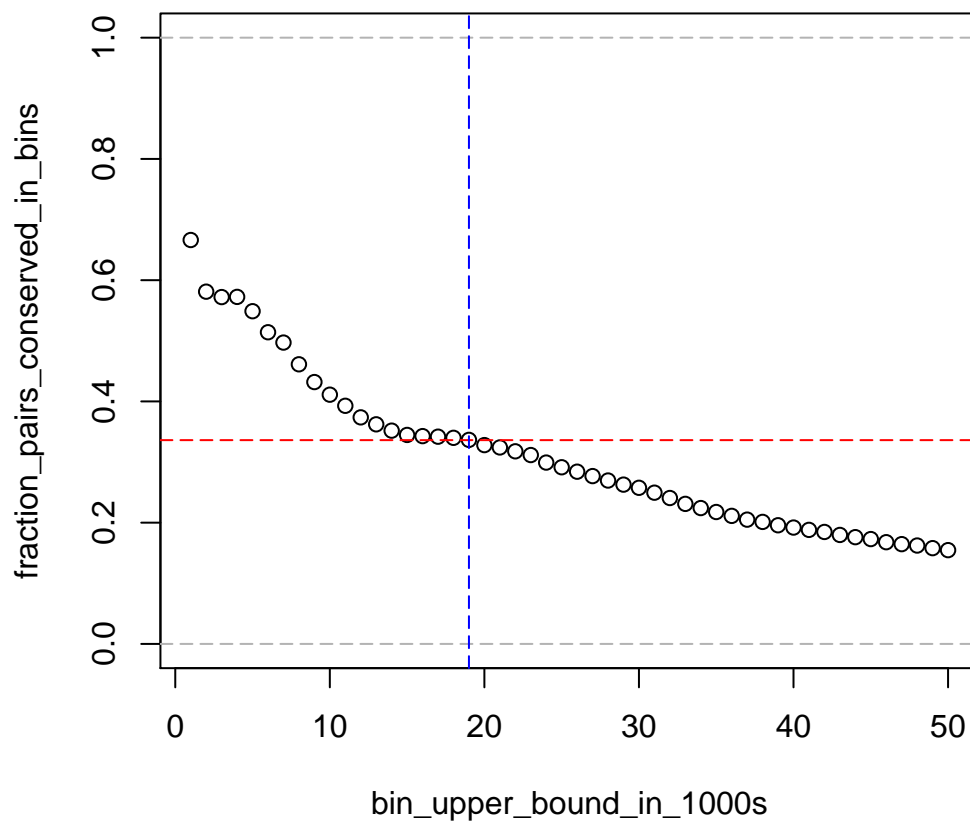

Supplement: s1 [file s1]

**Bin\_conservation\_minus\_bg\_CVB-1\_vs\_MA-1E**  
**PD-0.668467**

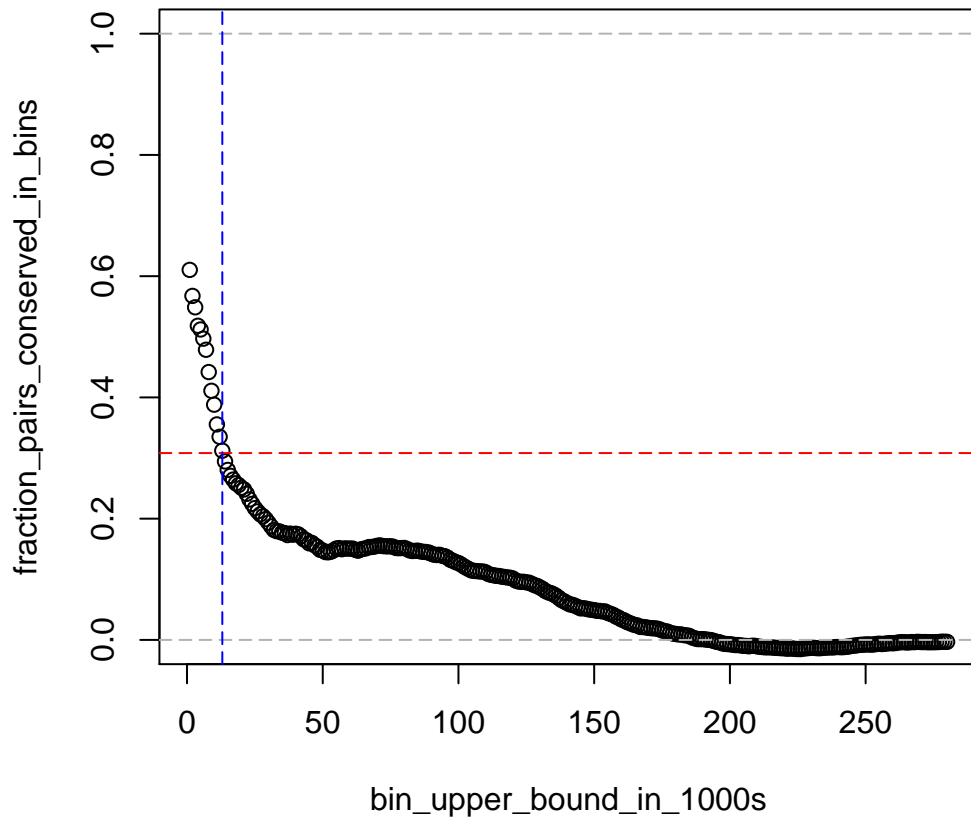

**Bin\_conservation\_minus\_bg\_CVB-1\_vs\_MA-1E**  
**PD-0.668467**

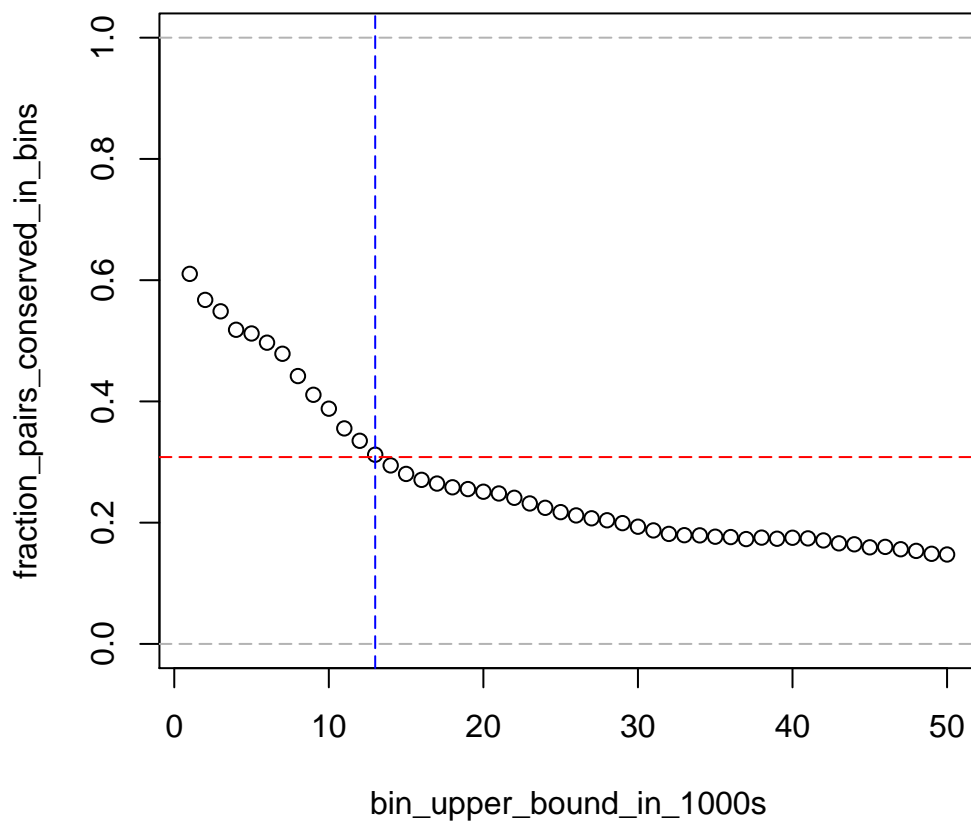

Supplement: s1 [file s1]

**Bin\_conservation\_minus\_bg\_MA-1D\_vs\_WI0606**  
**PD-0.704862**

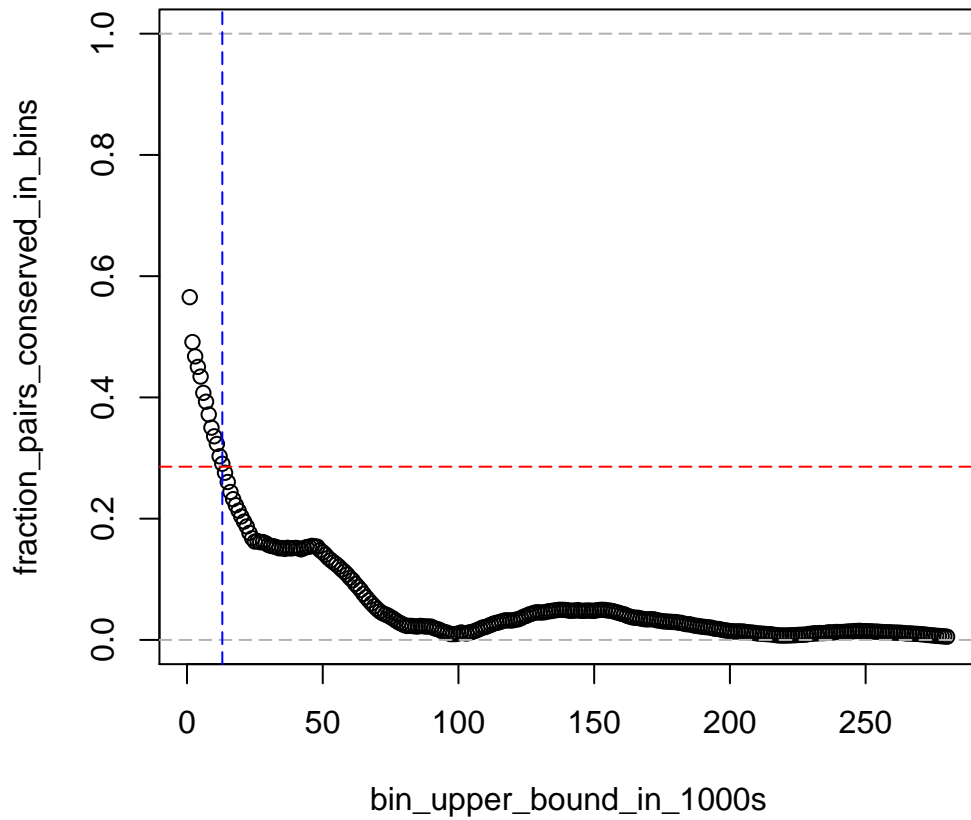

**Bin\_conservation\_minus\_bg\_MA-1D\_vs\_WI0606**  
**PD-0.704862**

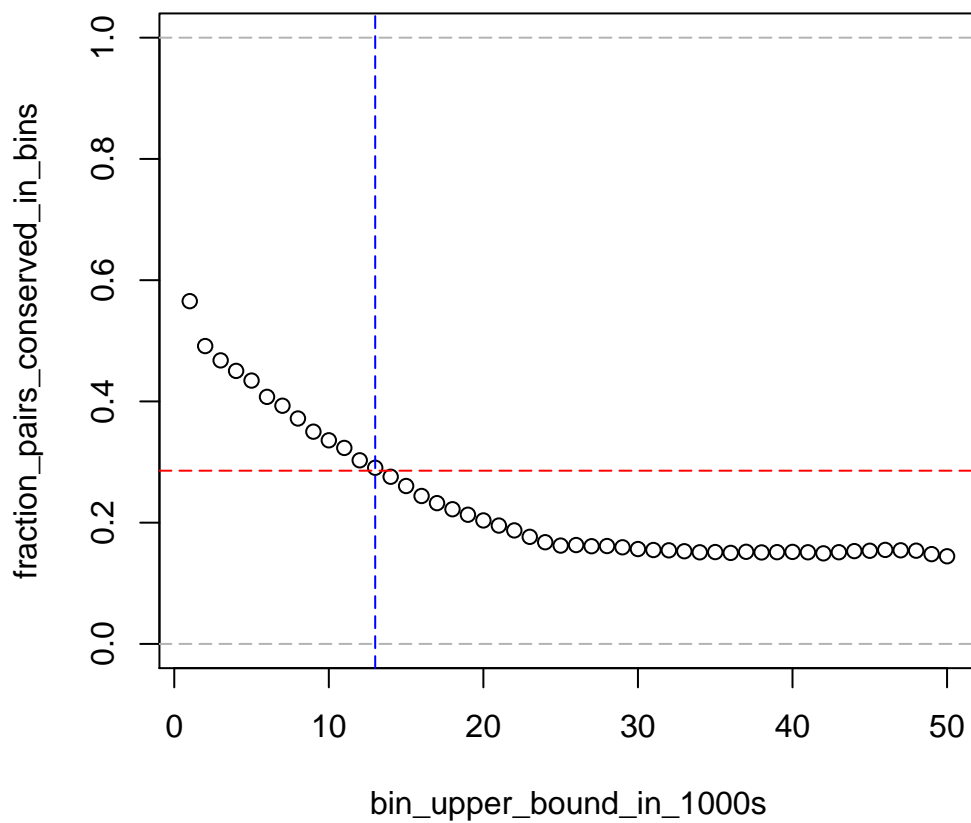

Supplement: s1 [file s1]

**Bin\_conservation\_minus\_bg\_KS1B\_vs\_NTS-1**  
**PD-0.688351**

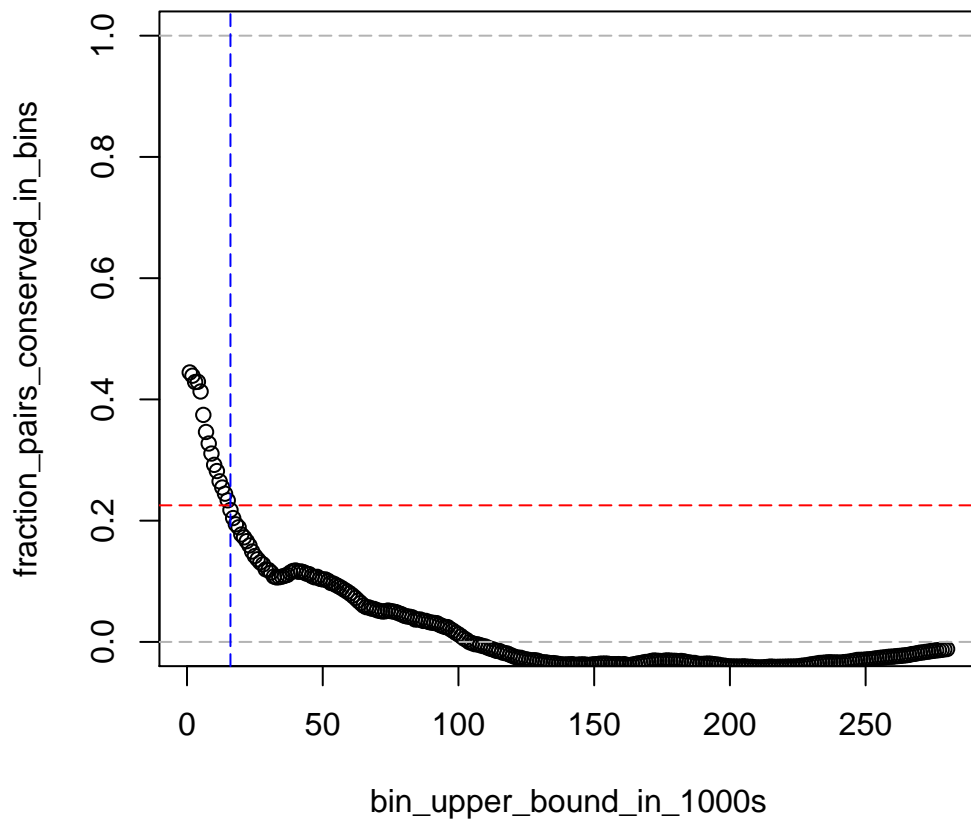

**Bin\_conservation\_minus\_bg\_KS1B\_vs\_NTS-1**  
**PD-0.688351**

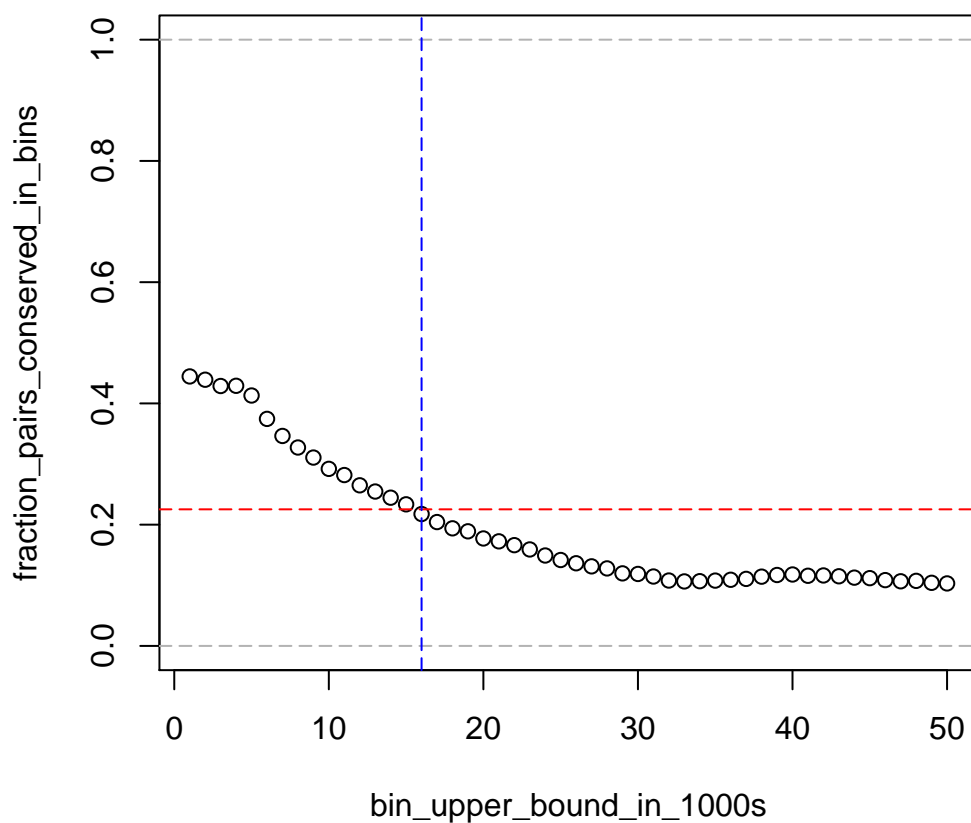

Supplement: s1 [file s1]

**Bin\_conservation\_minus\_bg\_CVA-1\_vs\_NYs-1**  
**PD-0.658168**

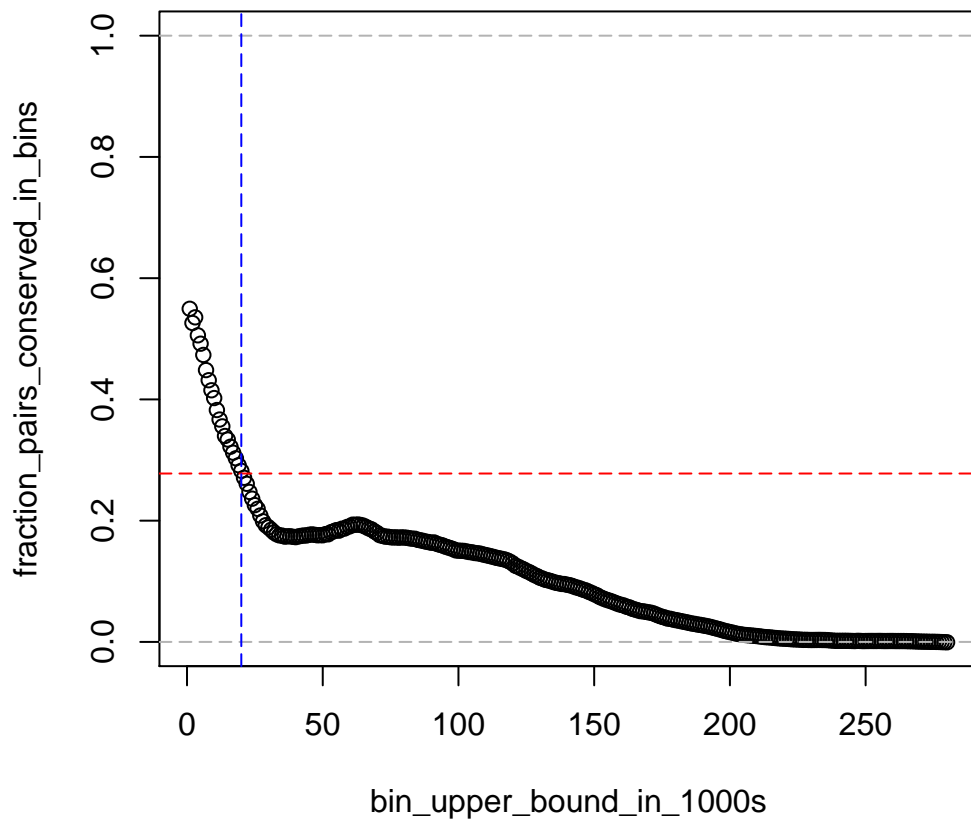

**Bin\_conservation\_minus\_bg\_CVA-1\_vs\_NYs-1**  
**PD-0.658168**

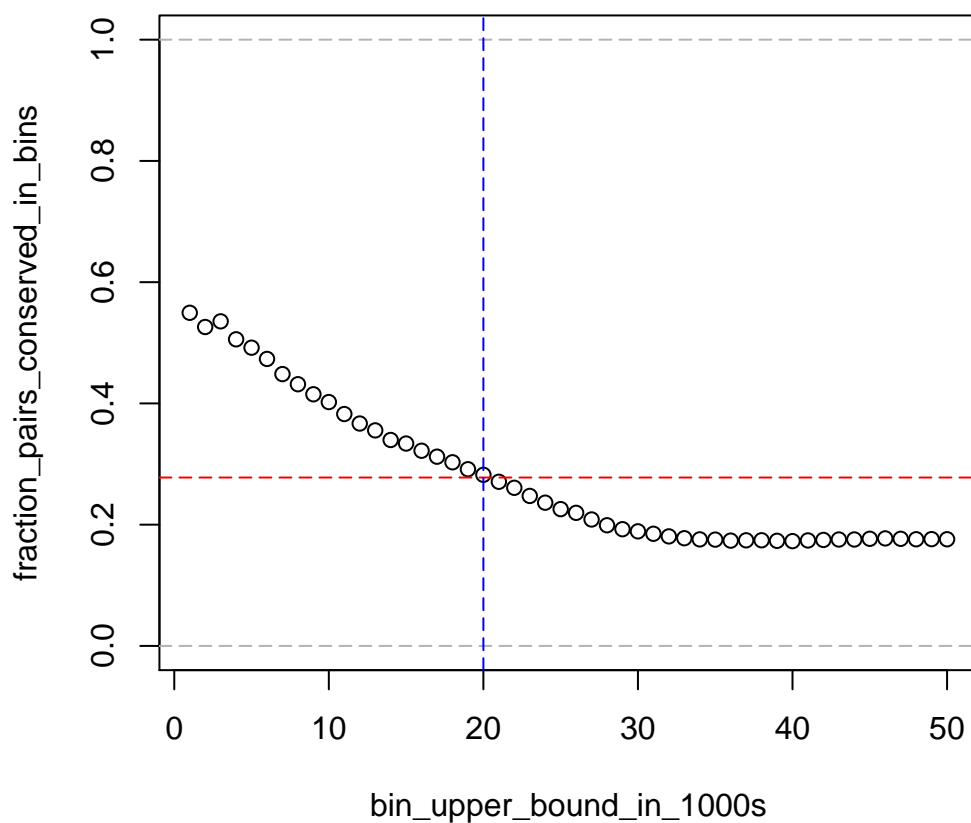

Supplement: s1 [file s1]

**Bin\_conservation\_minus\_bg\_GM0701.1\_vs\_NW665.2**  
**PD-0.452941**

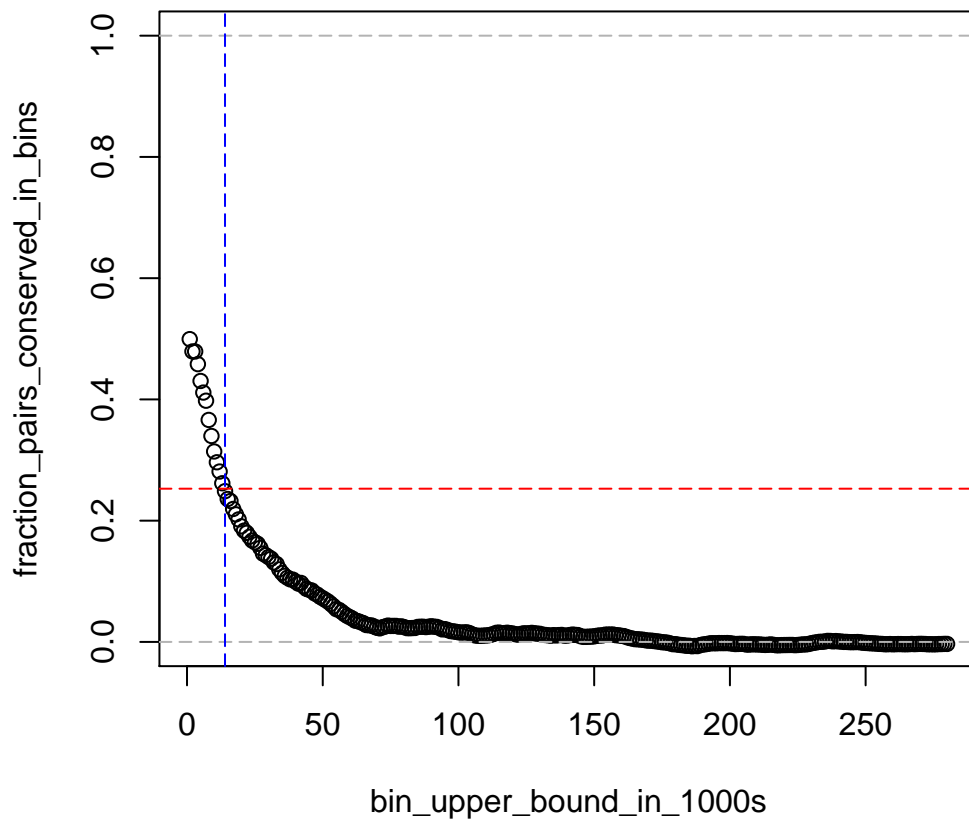

**Bin\_conservation\_minus\_bg\_GM0701.1\_vs\_NW665.2**  
**PD-0.452941**

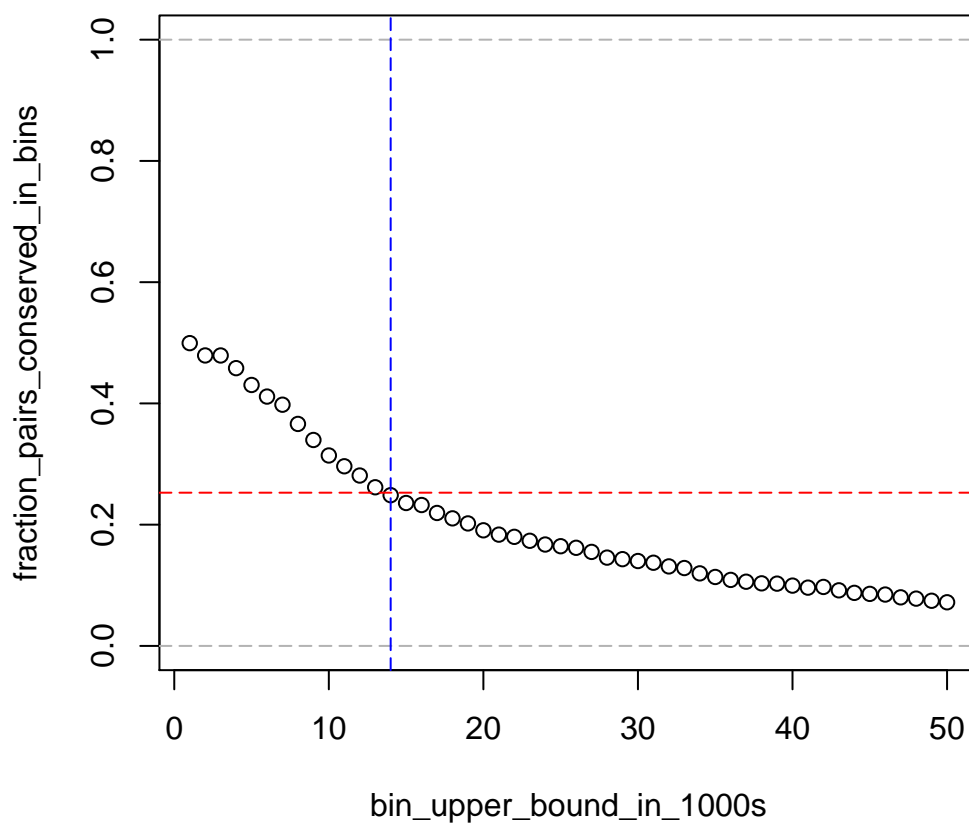

Supplement: s1 [file s1]

**Bin\_conservation\_minus\_bg\_Br0604L\_vs\_KS1B**  
**PD-0.682656**

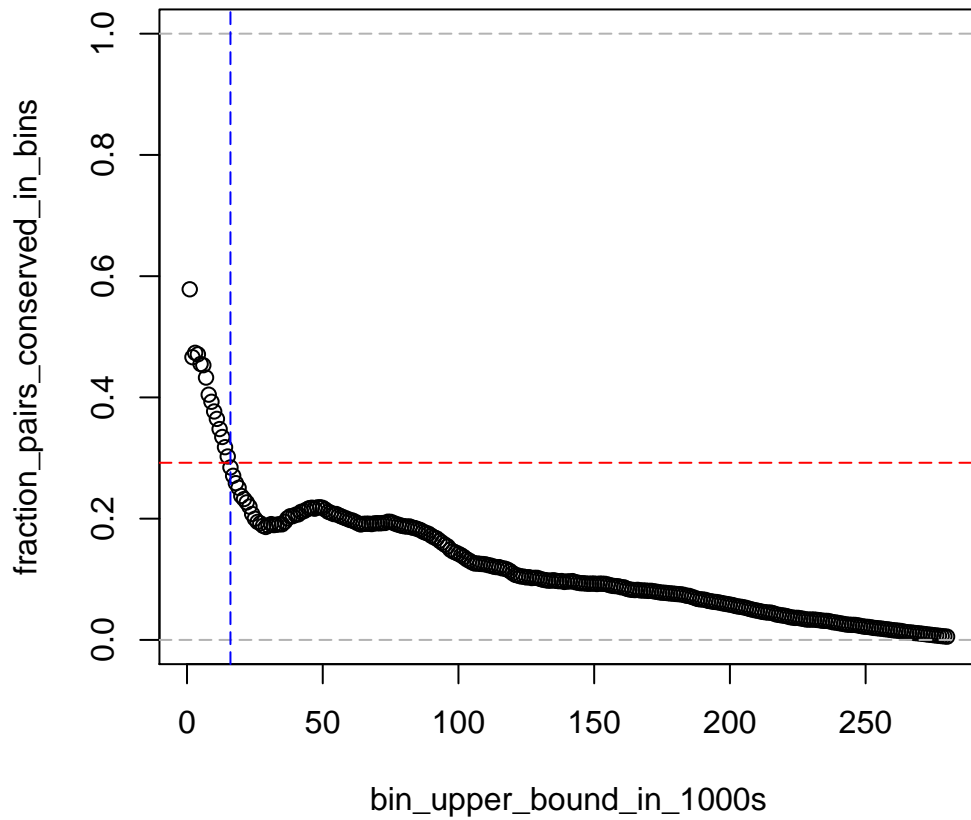

**Bin\_conservation\_minus\_bg\_Br0604L\_vs\_KS1B**  
**PD-0.682656**

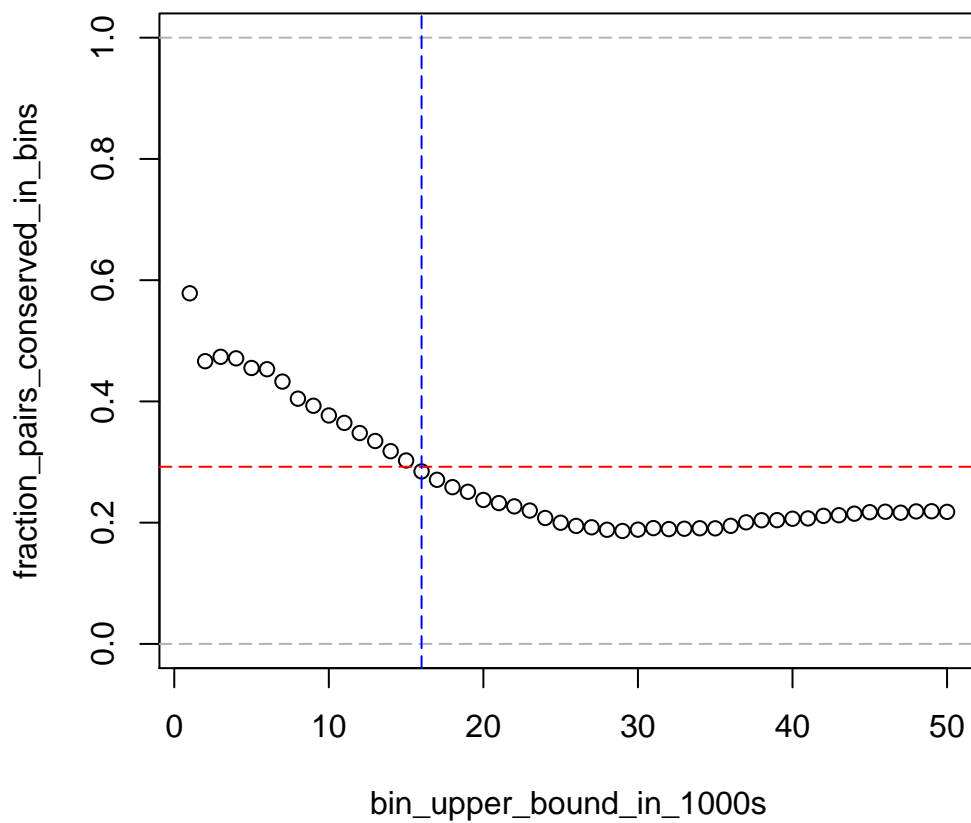

Supplement: s1 [file s1]

**Bin\_conservation\_minus\_bg\_MA-1D\_vs\_OR0704.2.2**  
**PD-0.658135**

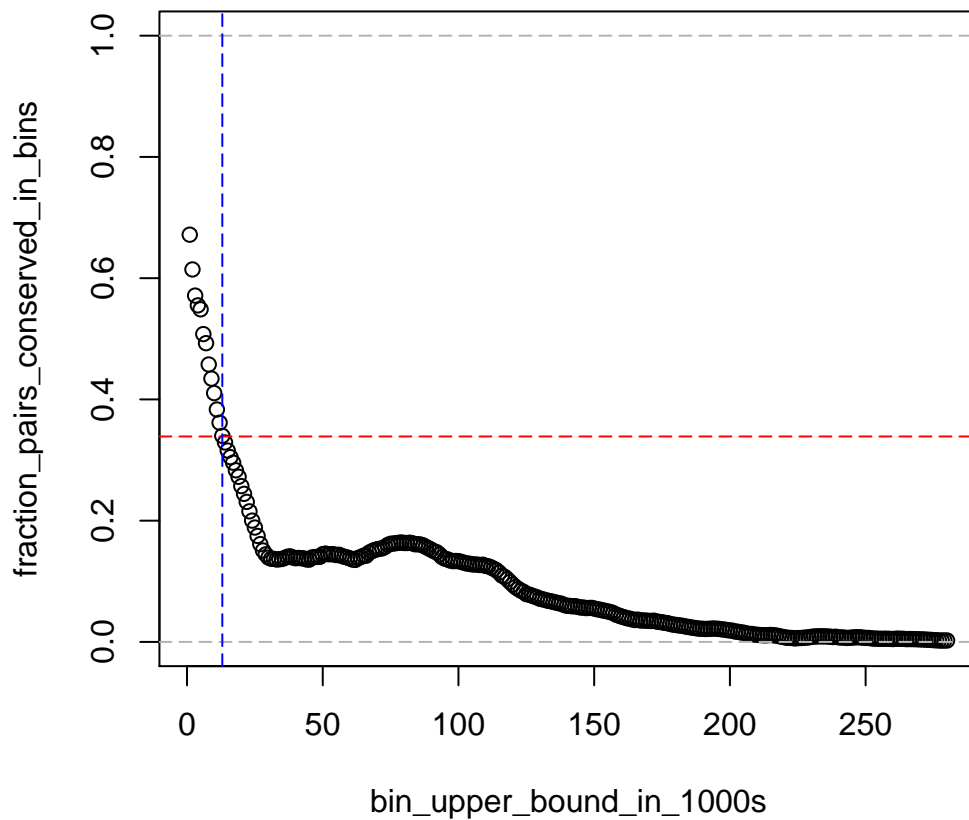

**Bin\_conservation\_minus\_bg\_MA-1D\_vs\_OR0704.2.2**  
**PD-0.658135**

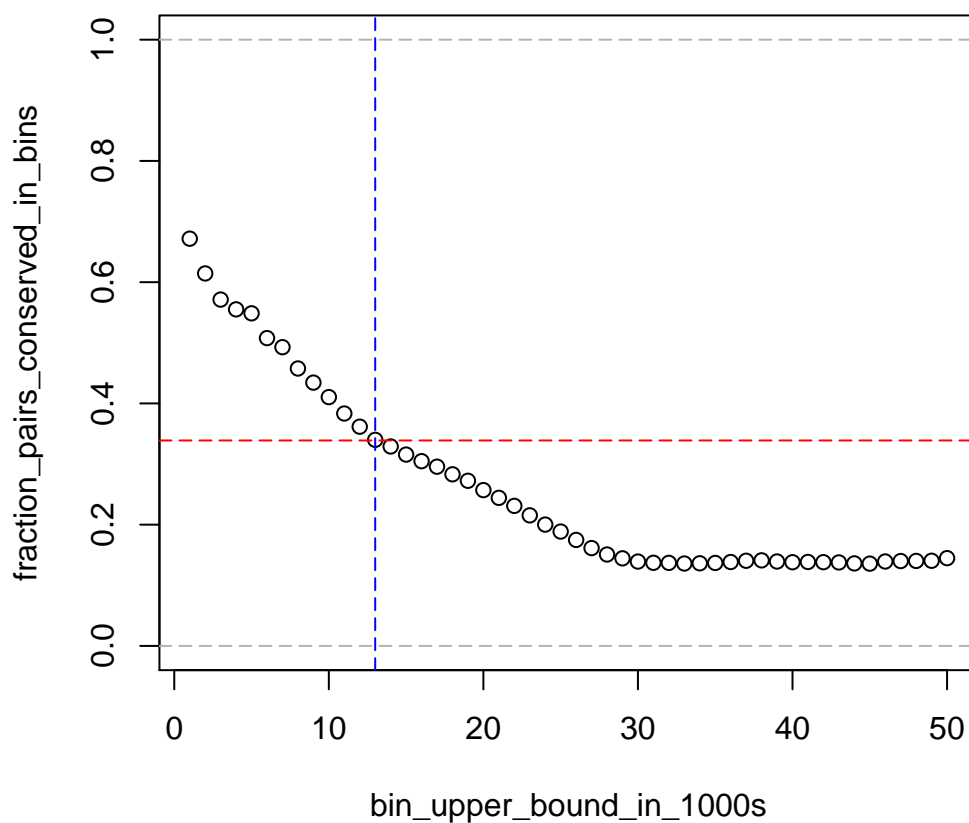

Supplement: s1 [file s1]

**Bin\_conservation\_minus\_bg\_Fr5L\_vs\_OR0704.2.2**  
**PD-0.014302**

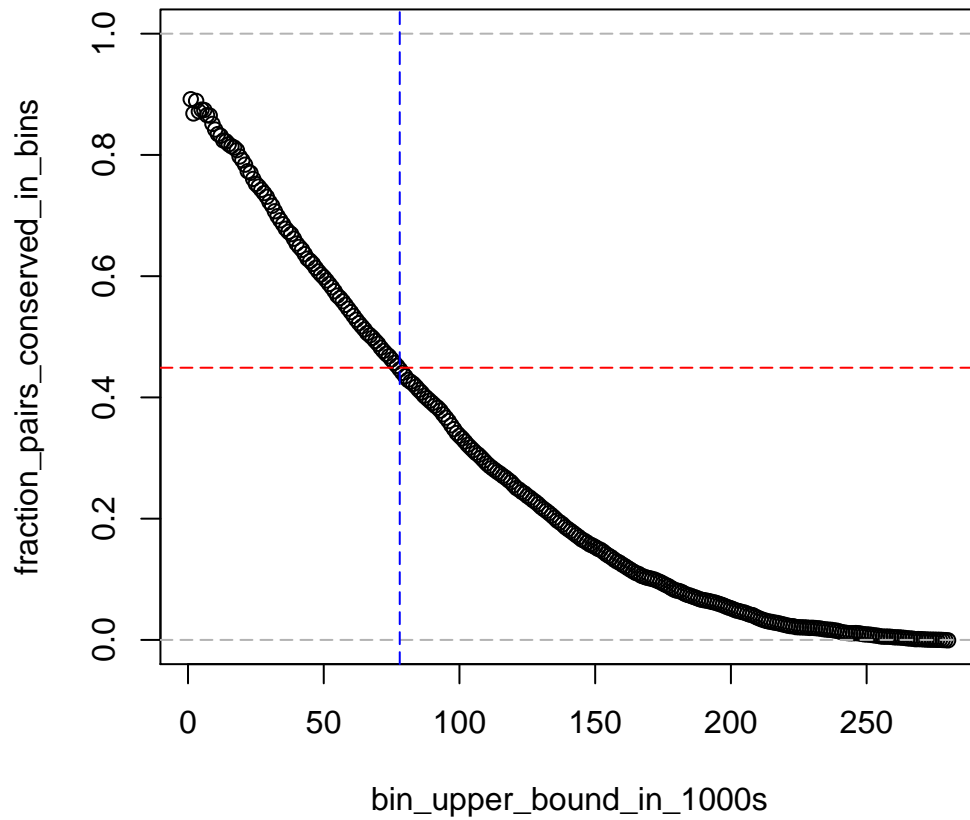

**Bin\_conservation\_minus\_bg\_Fr5L\_vs\_OR0704.2.2**  
**PD-0.014302**

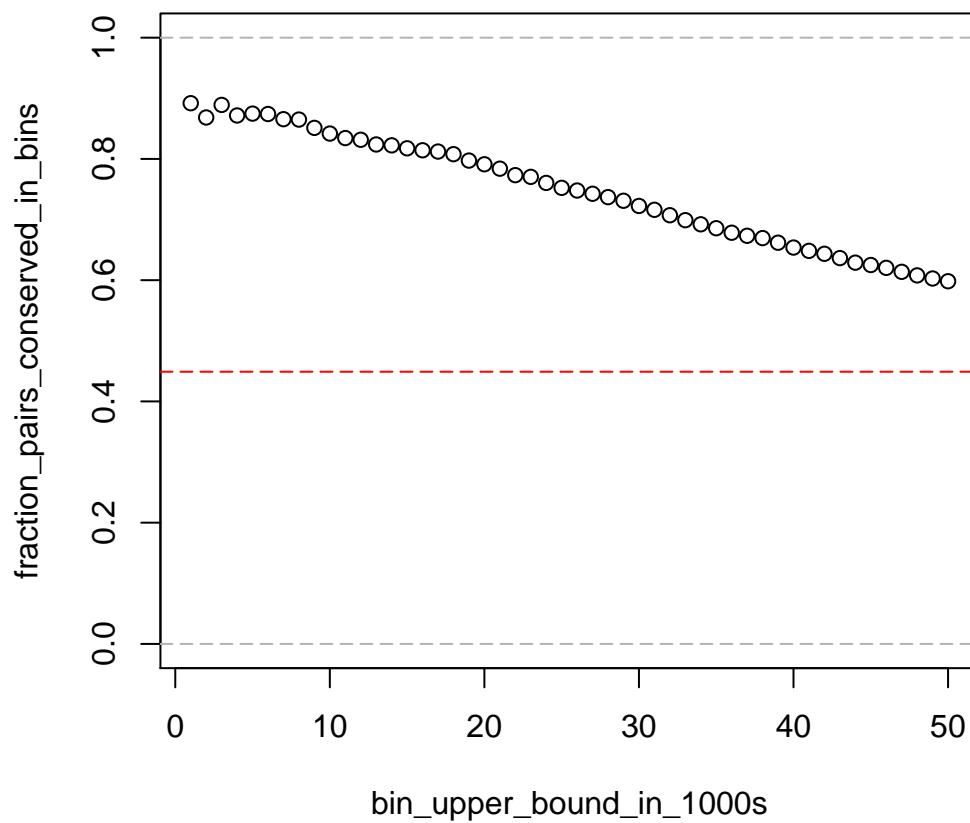

Supplement: s1 [file s1]

**Bin\_conservation\_minus\_bg\_KS1B\_vs\_MA-1E**  
**PD-0.018366**

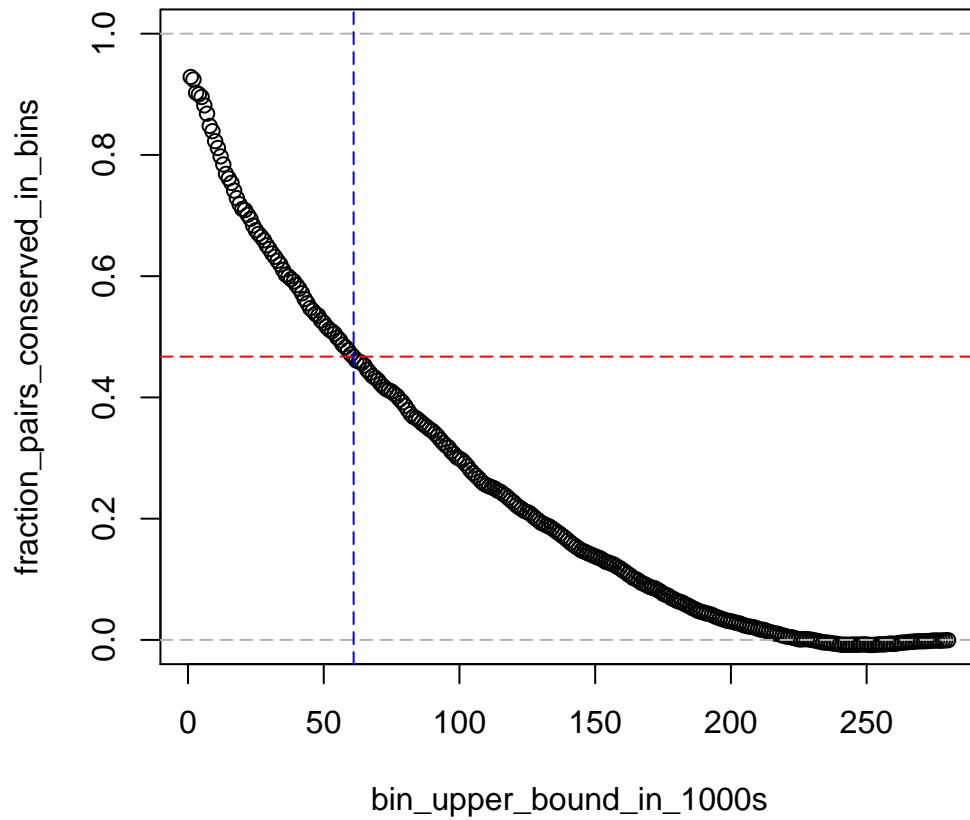

**Bin\_conservation\_minus\_bg\_KS1B\_vs\_MA-1E**  
**PD-0.018366**

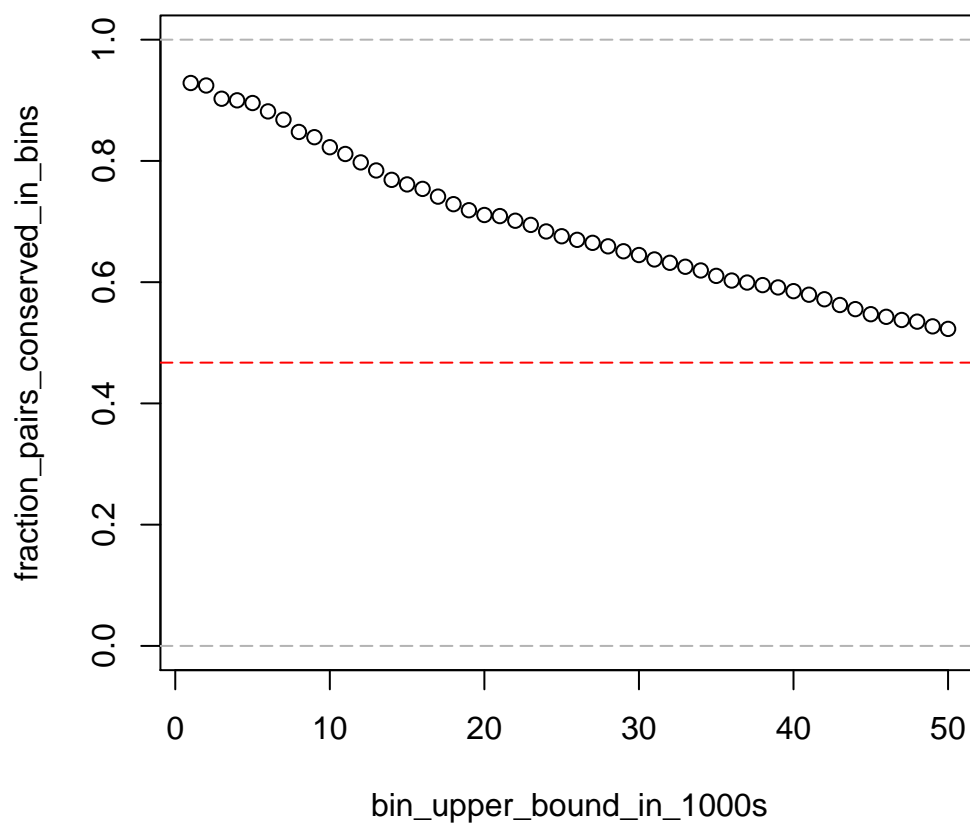

Supplement: s1 [file s1]

**Bin\_conservation\_minus\_bg\_AR158\_vs\_KS1B**  
**PD-0.149479**

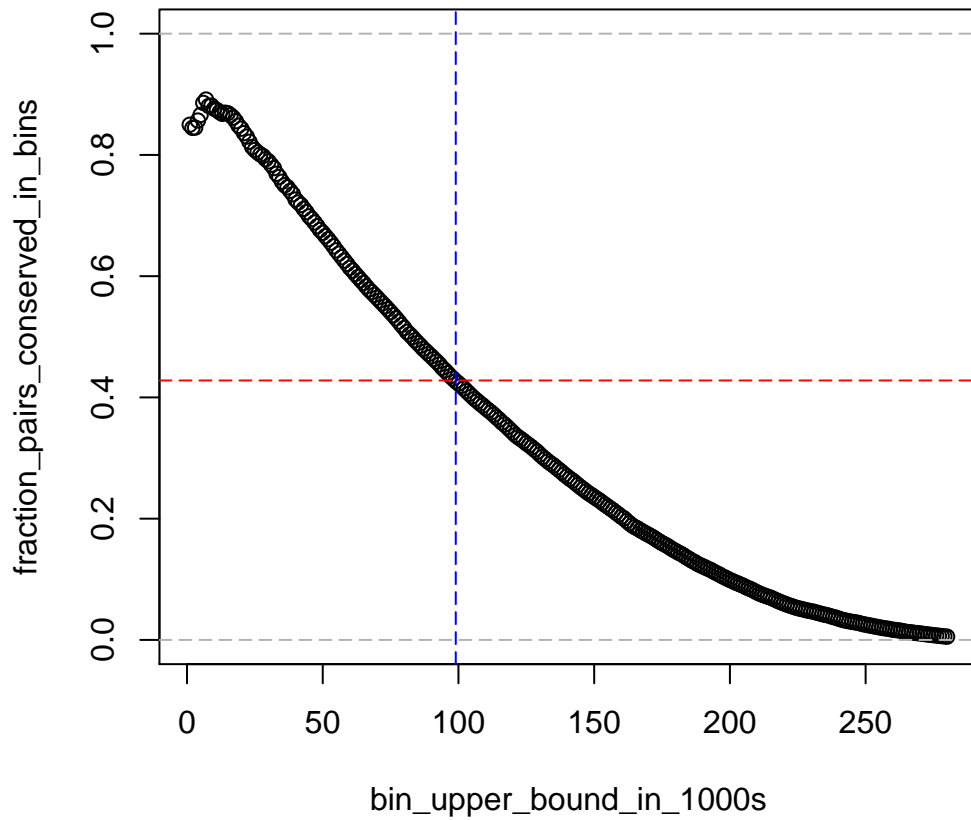

**Bin\_conservation\_minus\_bg\_AR158\_vs\_KS1B**  
**PD-0.149479**

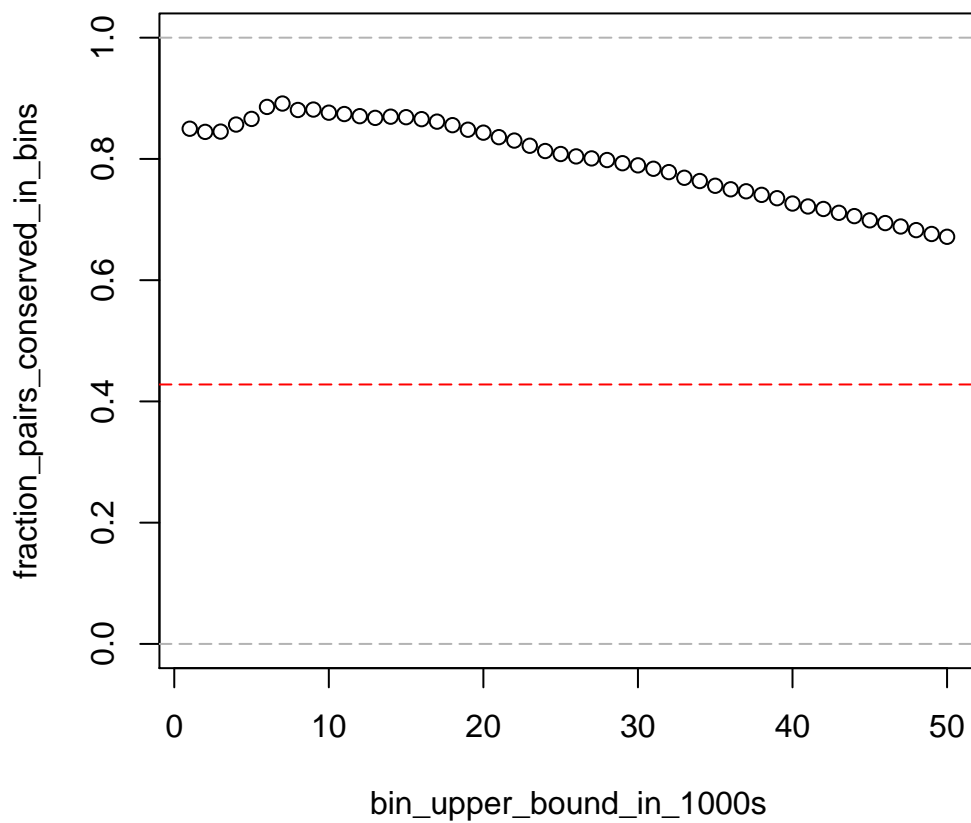

Supplement: s1 [file s1]

**Bin\_conservation\_minus\_bg\_CVM-1\_vs\_TN603.4.2**  
**PD-0.449038**

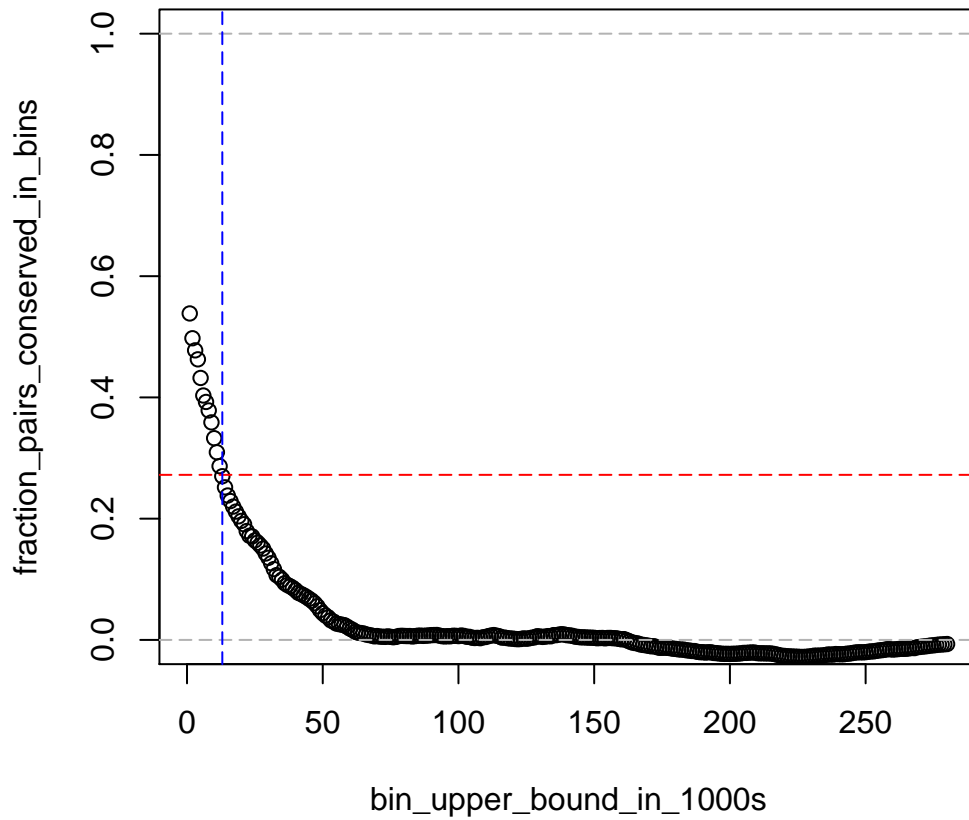

**Bin\_conservation\_minus\_bg\_CVM-1\_vs\_TN603.4.2**  
**PD-0.449038**

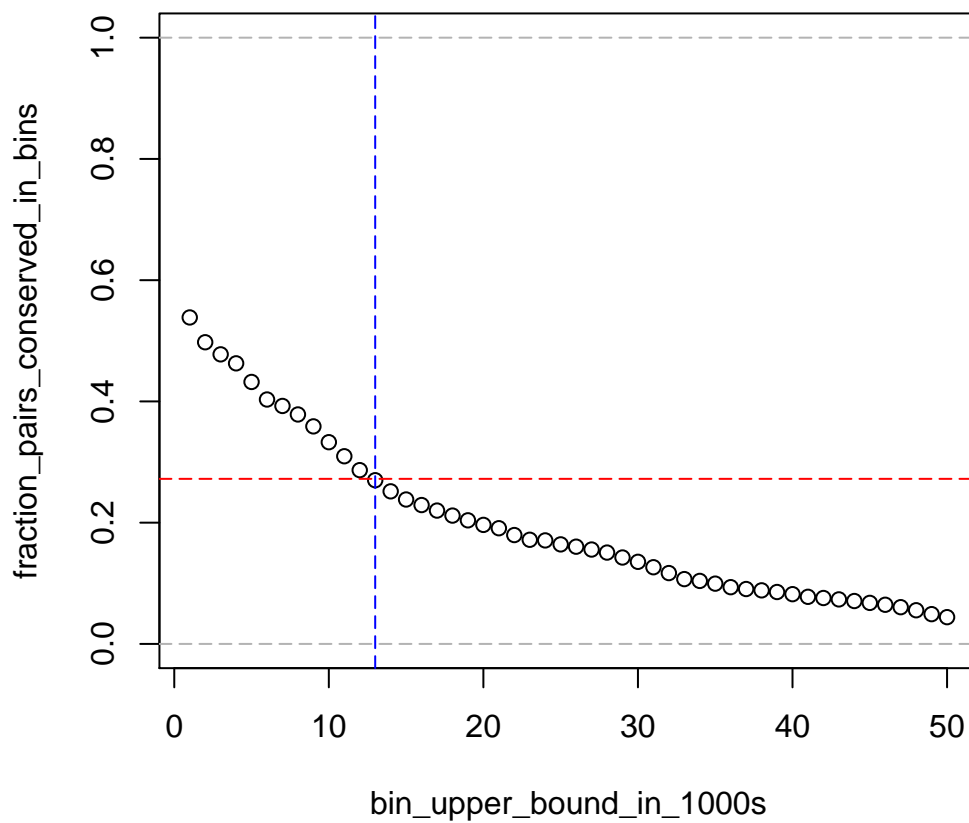

Supplement: s1 [file s1]

**Bin\_conservation\_minus\_bg\_FR483\_vs\_NY-2B**  
**PD-0.66835**

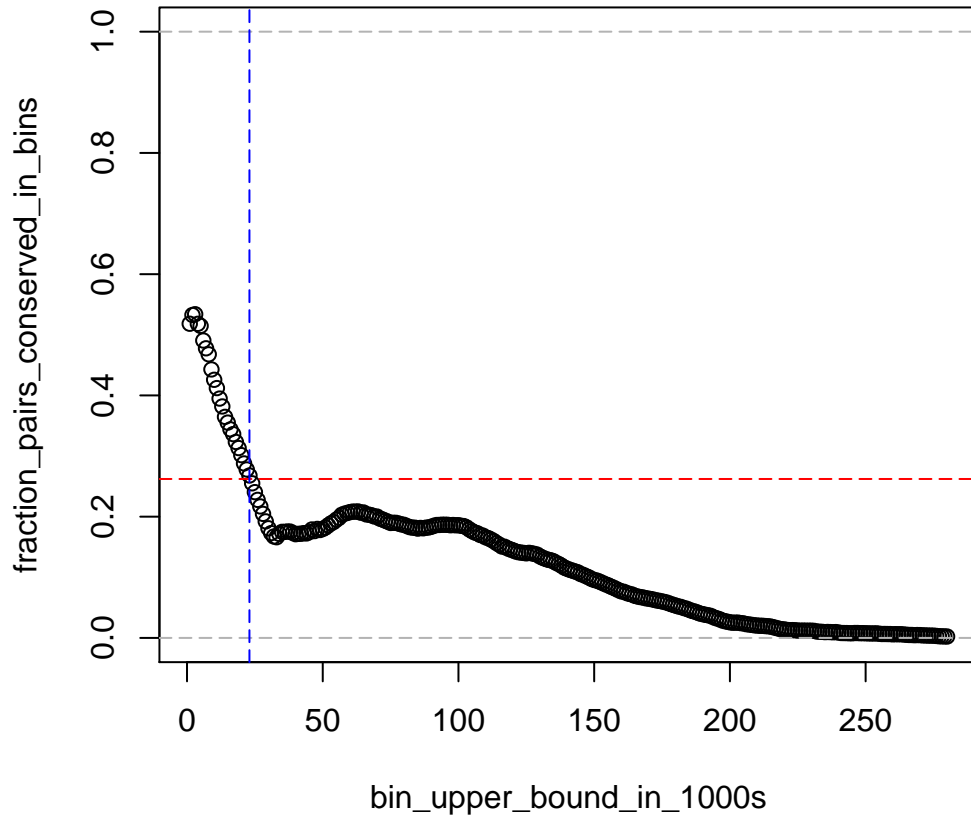

**Bin\_conservation\_minus\_bg\_FR483\_vs\_NY-2B**  
**PD-0.66835**

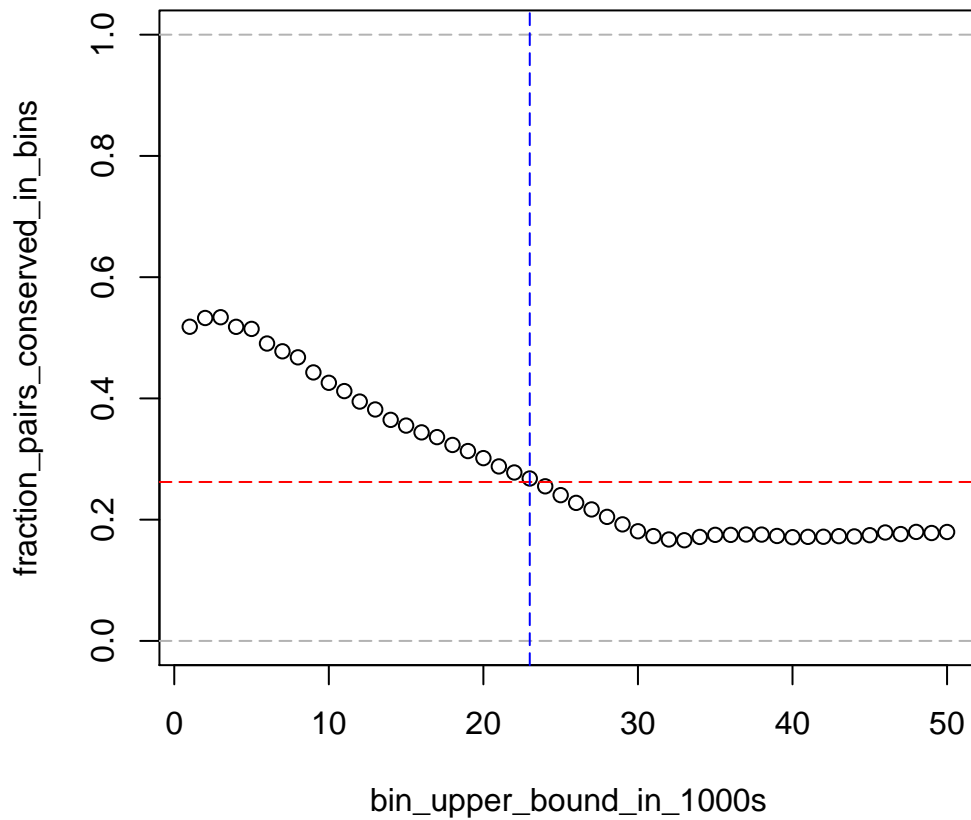

Supplement: s1 [file s1]

**Bin\_conservation\_minus\_bg\_NE-JV-4\_vs\_OR0704.2.2**  
**PD-0.638954**

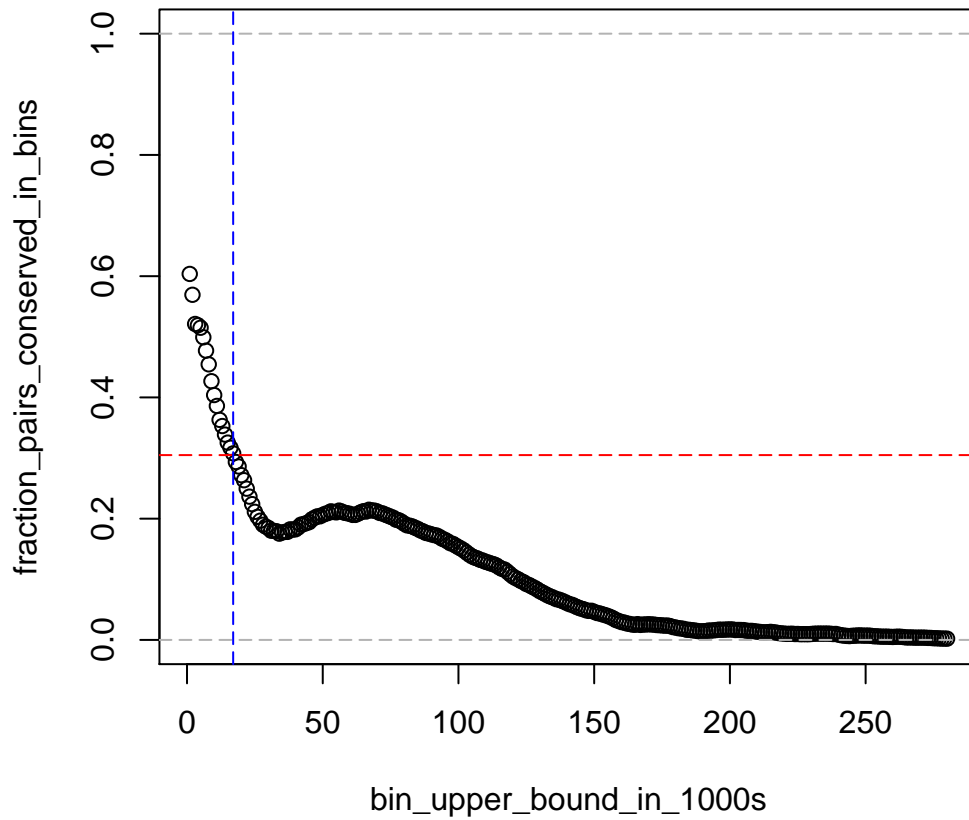

**Bin\_conservation\_minus\_bg\_NE-JV-4\_vs\_OR0704.2.2**  
**PD-0.638954**

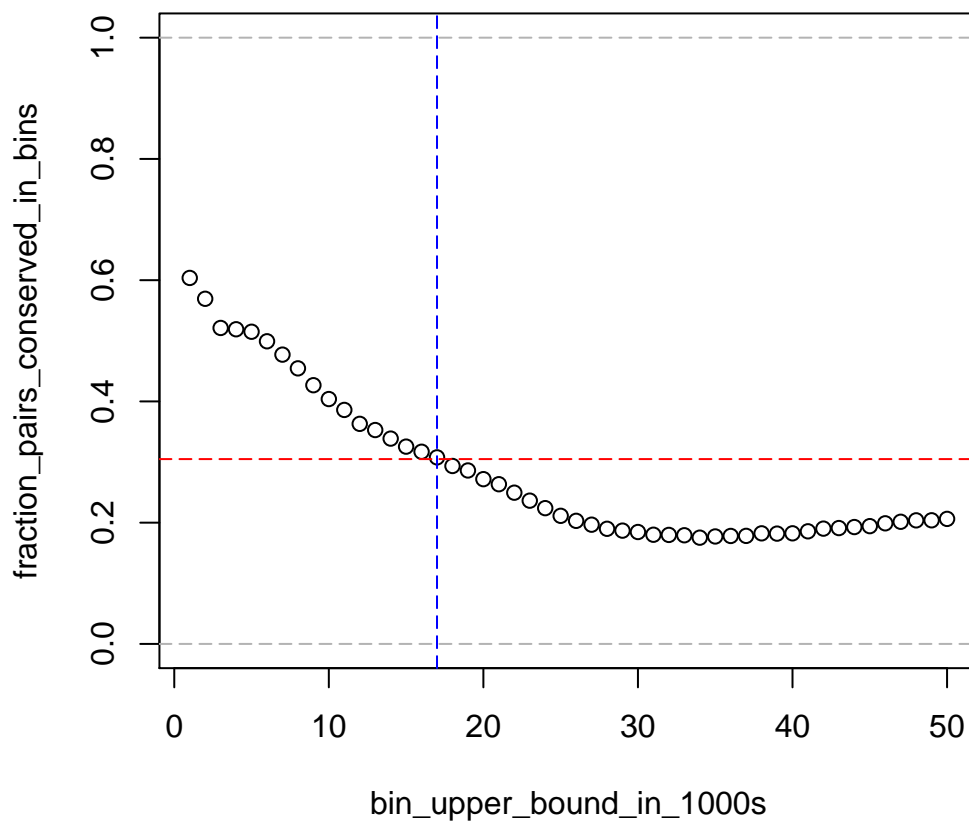

Supplement: s1 [file s1]

**Bin\_conservation\_minus\_bg\_CZ-2\_vs\_PBCV1**  
**PD-0.639688**

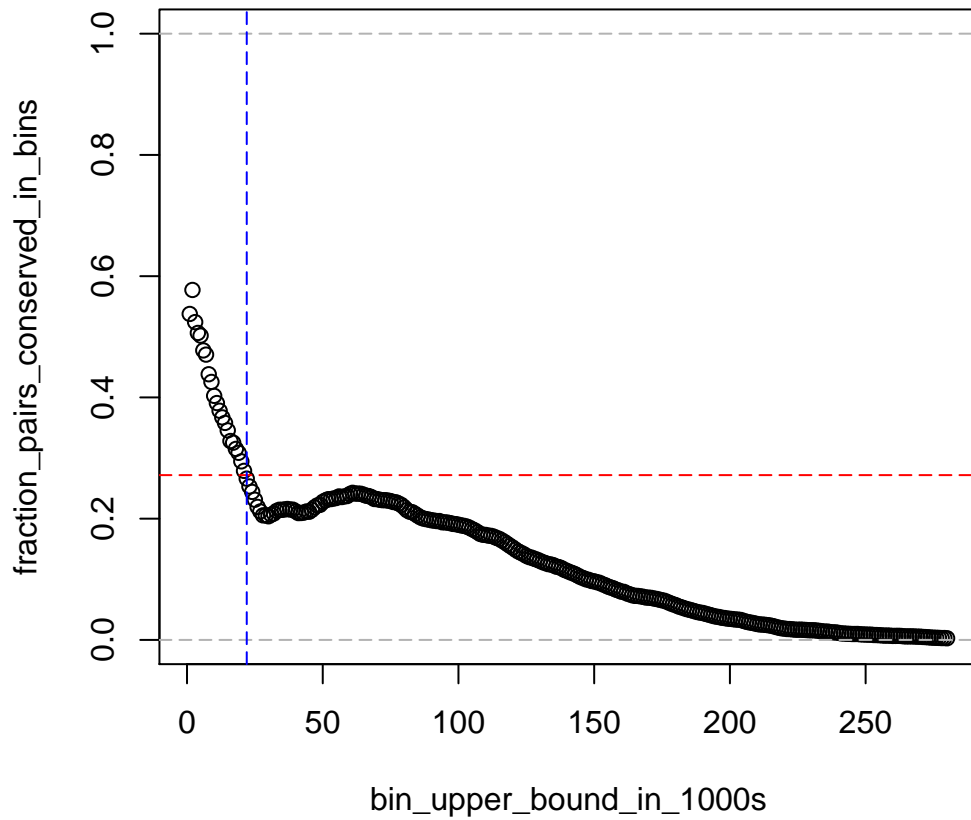

**Bin\_conservation\_minus\_bg\_CZ-2\_vs\_PBCV1**  
**PD-0.639688**

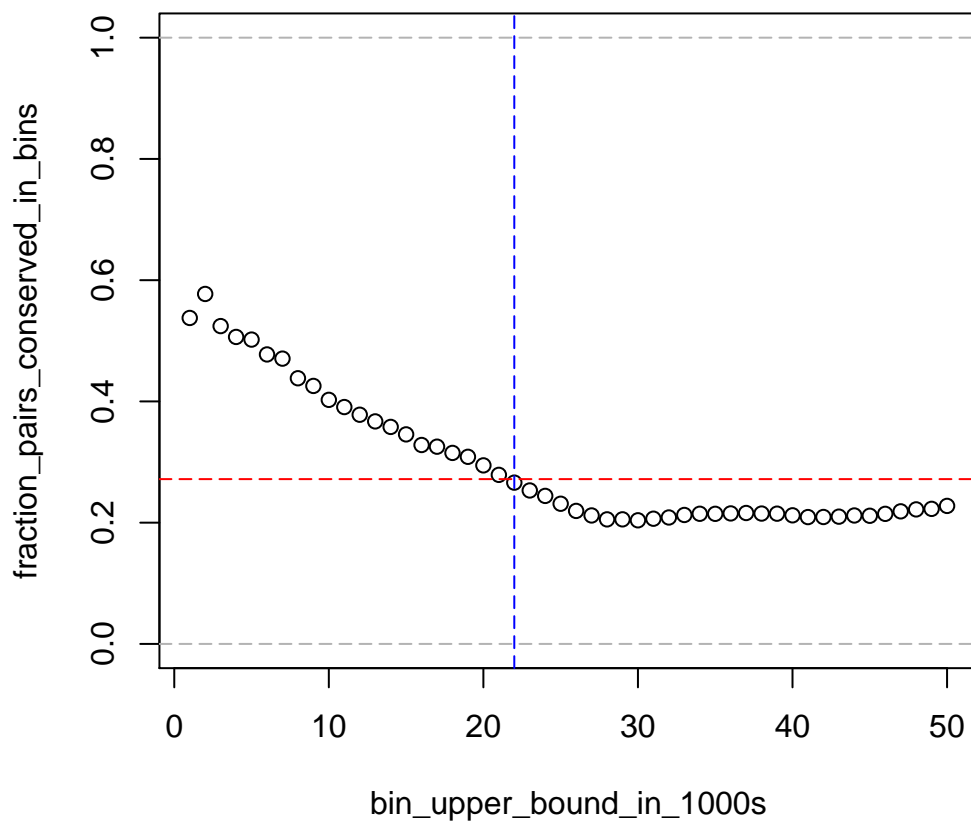

Supplement: s1 [file s1]

**Bin\_conservation\_minus\_bg\_CVR-1\_vs\_CvsA1**  
**PD-0.650141**

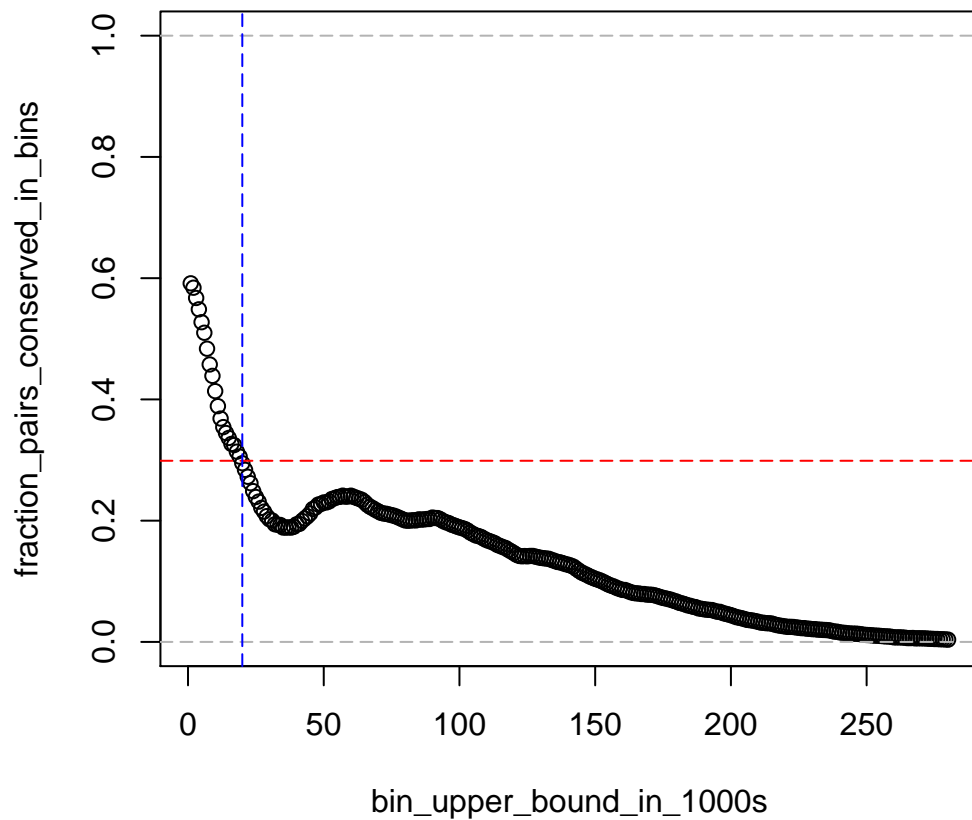

**Bin\_conservation\_minus\_bg\_CVR-1\_vs\_CvsA1**  
**PD-0.650141**

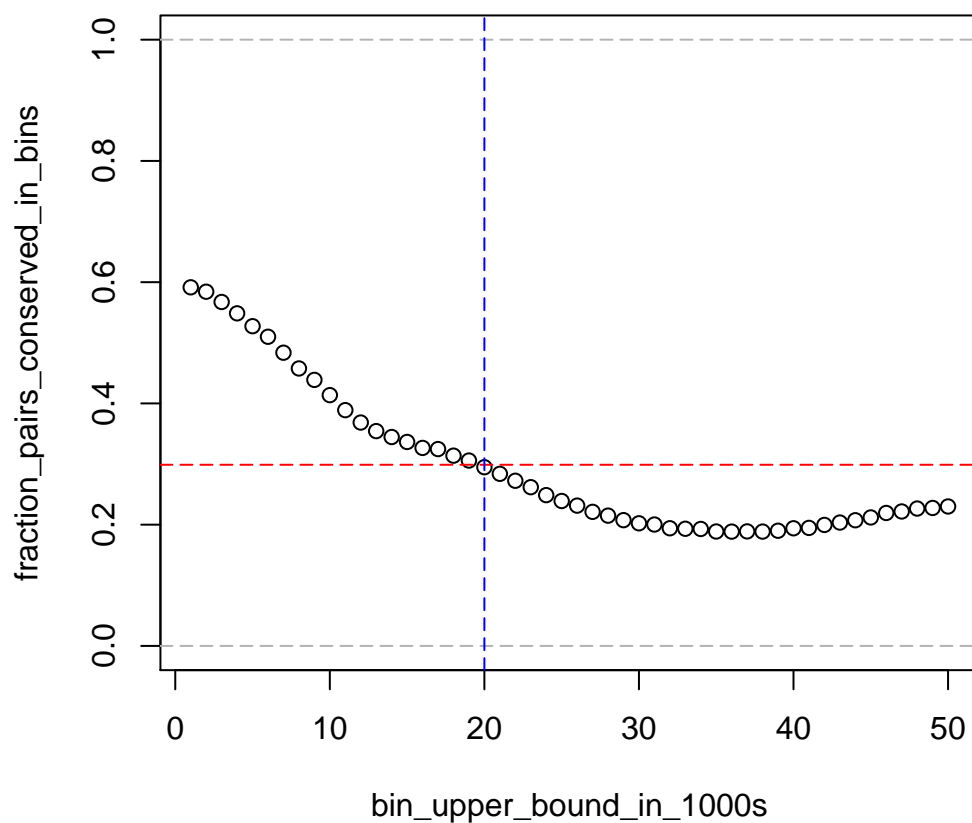

Supplement: s1 [file s1]

**Bin\_conservation\_minus\_bg\_ATCV1\_vs\_CZ-2**  
**PD-0.464377**

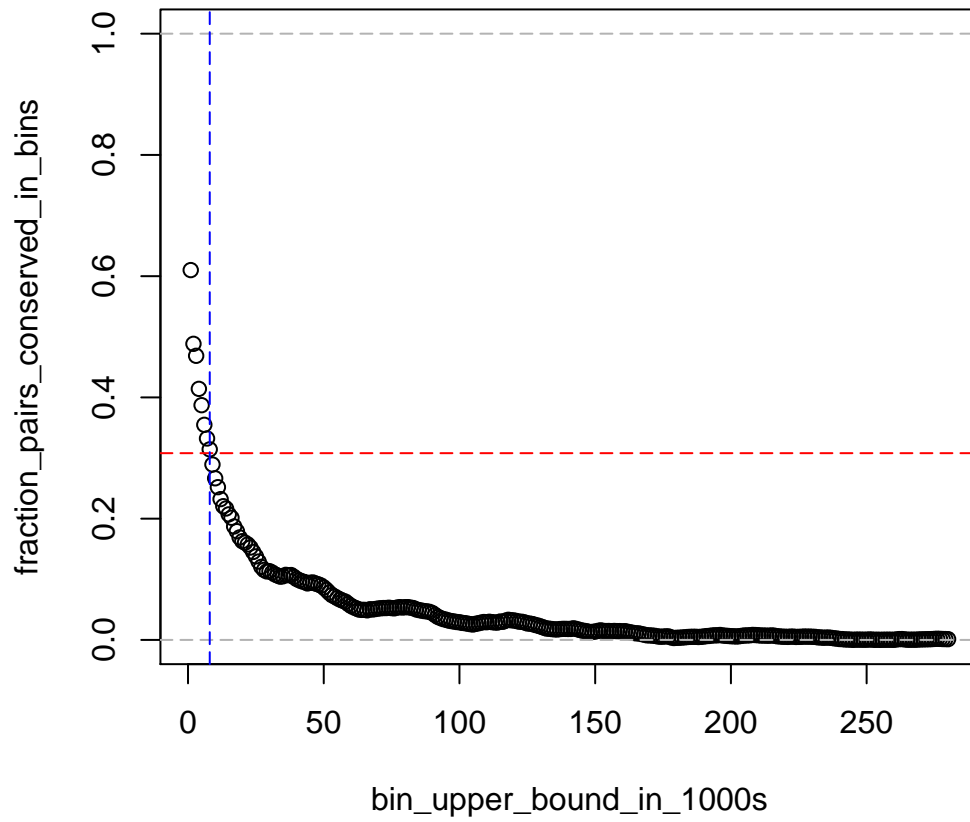

**Bin\_conservation\_minus\_bg\_ATCV1\_vs\_CZ-2**  
**PD-0.464377**

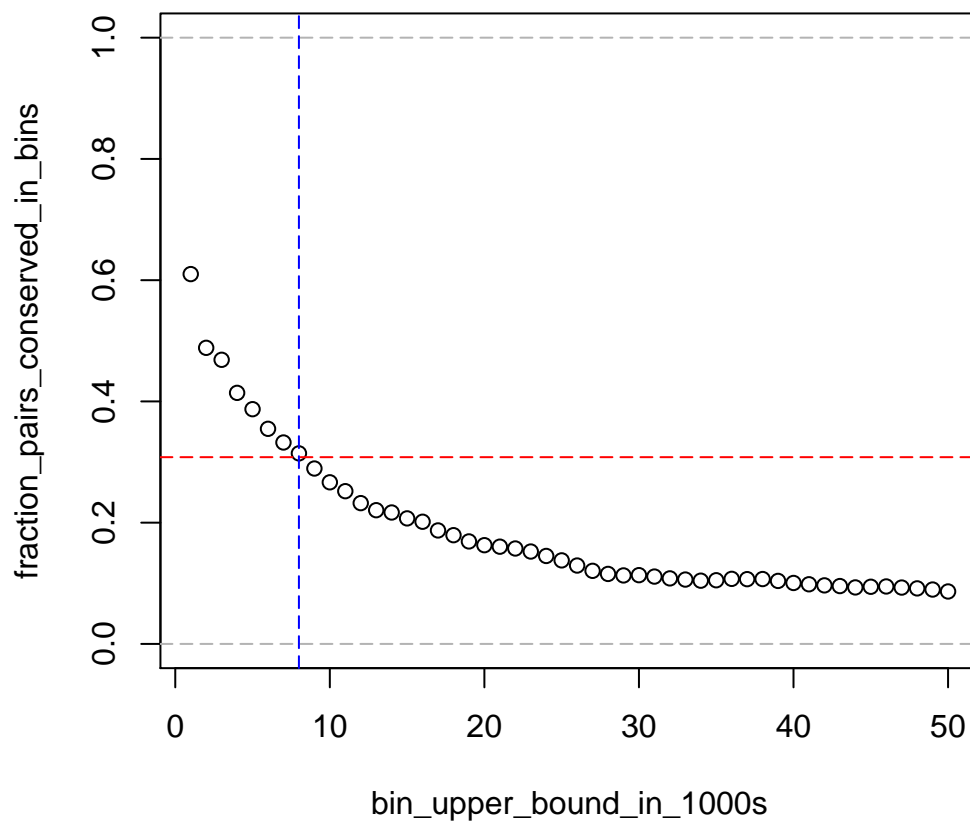

Supplement: s1 [file s1]

**Bin\_conservation\_minus\_bg\_CVM-1\_vs\_IL-3A**  
**PD-0.638474**

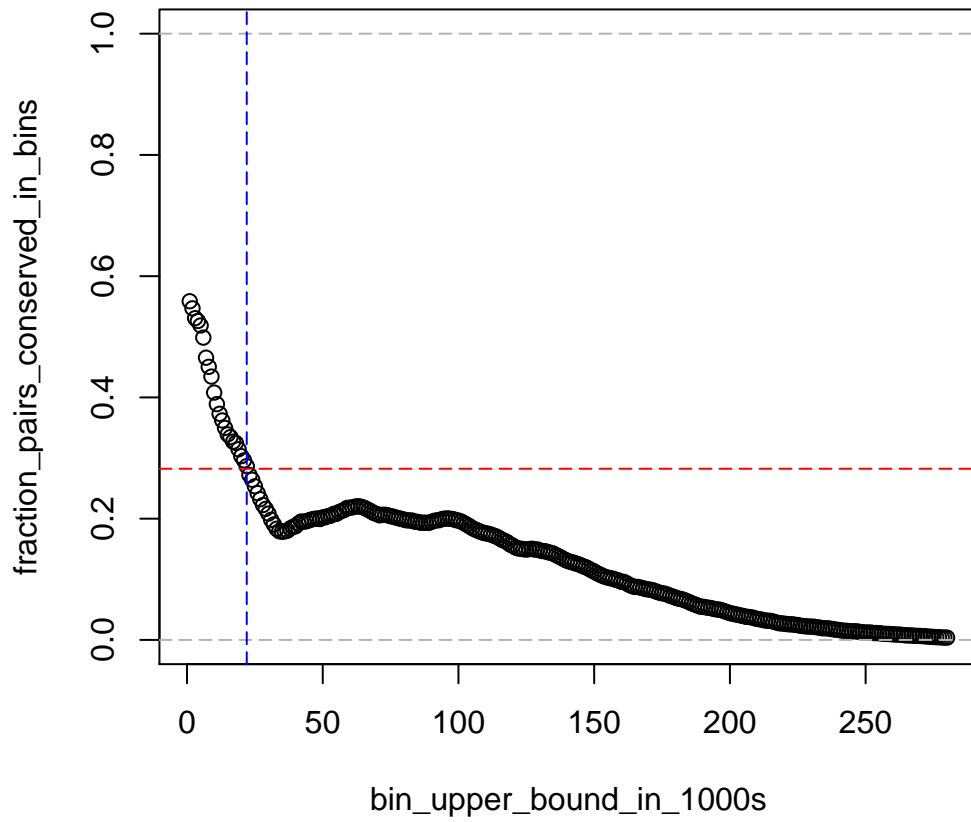

**Bin\_conservation\_minus\_bg\_CVM-1\_vs\_IL-3A**  
**PD-0.638474**

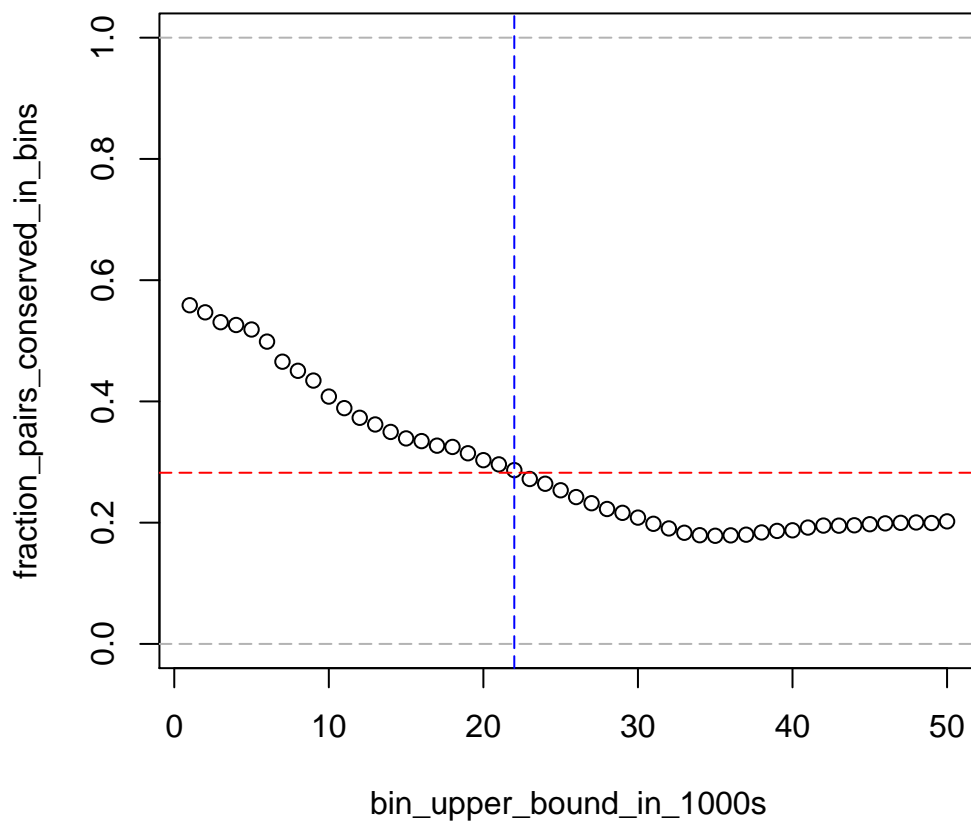

Supplement: s1 [file s1]

**Bin\_conservation\_minus\_bg\_CviKI\_vs\_NY-2B**  
**PD-0.14961**

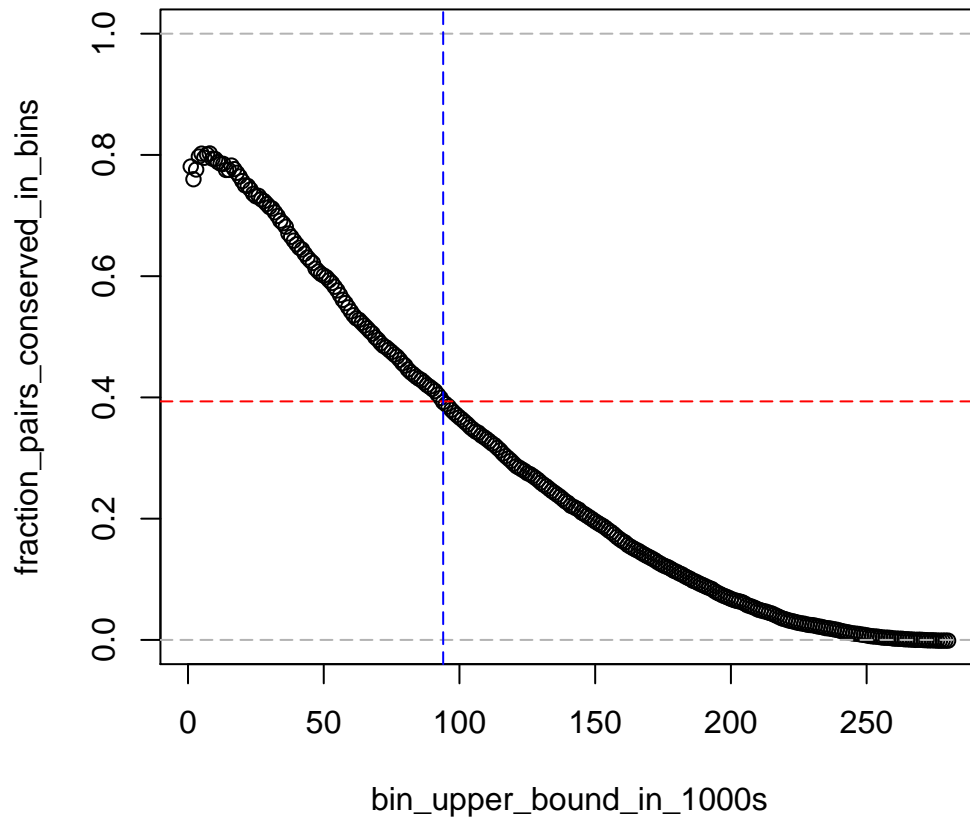

**Bin\_conservation\_minus\_bg\_CviKI\_vs\_NY-2B**  
**PD-0.14961**

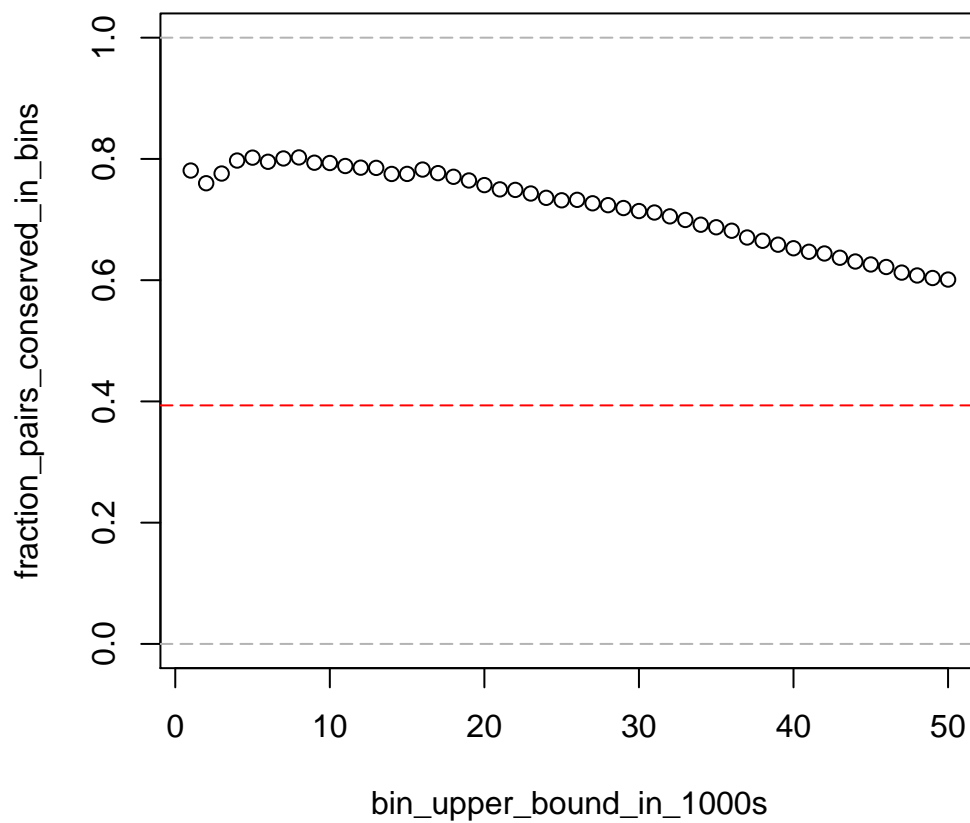

Supplement: s1 [file s1]

**Bin\_conservation\_minus\_bg\_CVG-1\_vs\_MT325**  
**PD-0.024784**

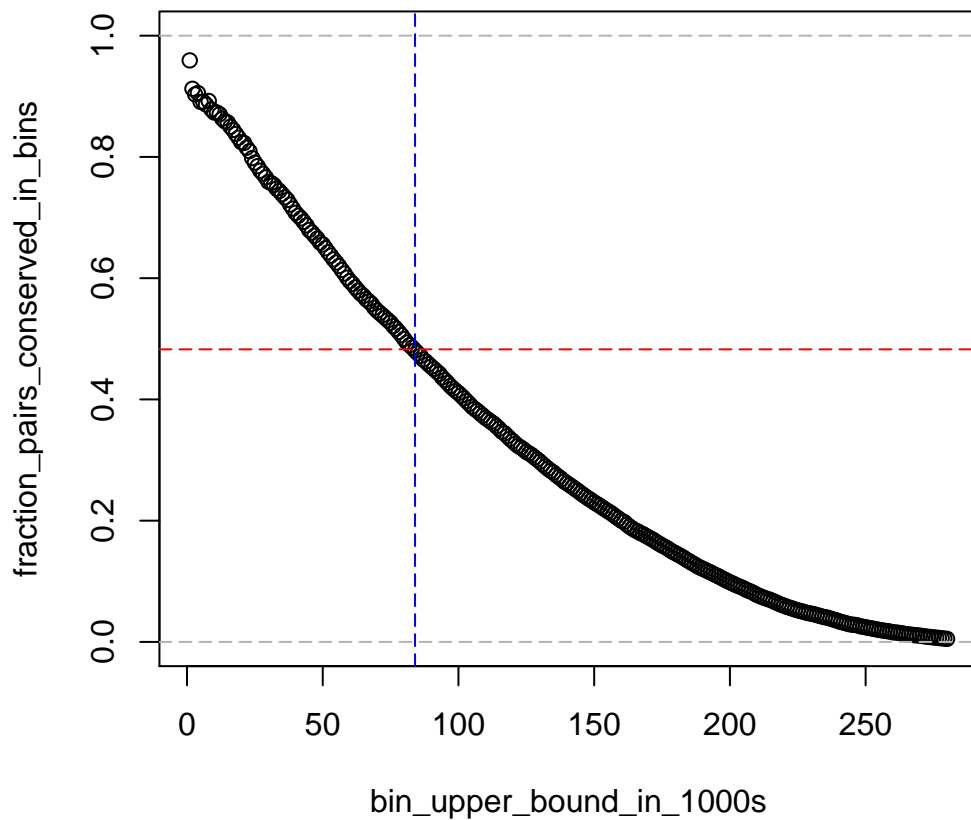

**Bin\_conservation\_minus\_bg\_CVG-1\_vs\_MT325**  
**PD-0.024784**

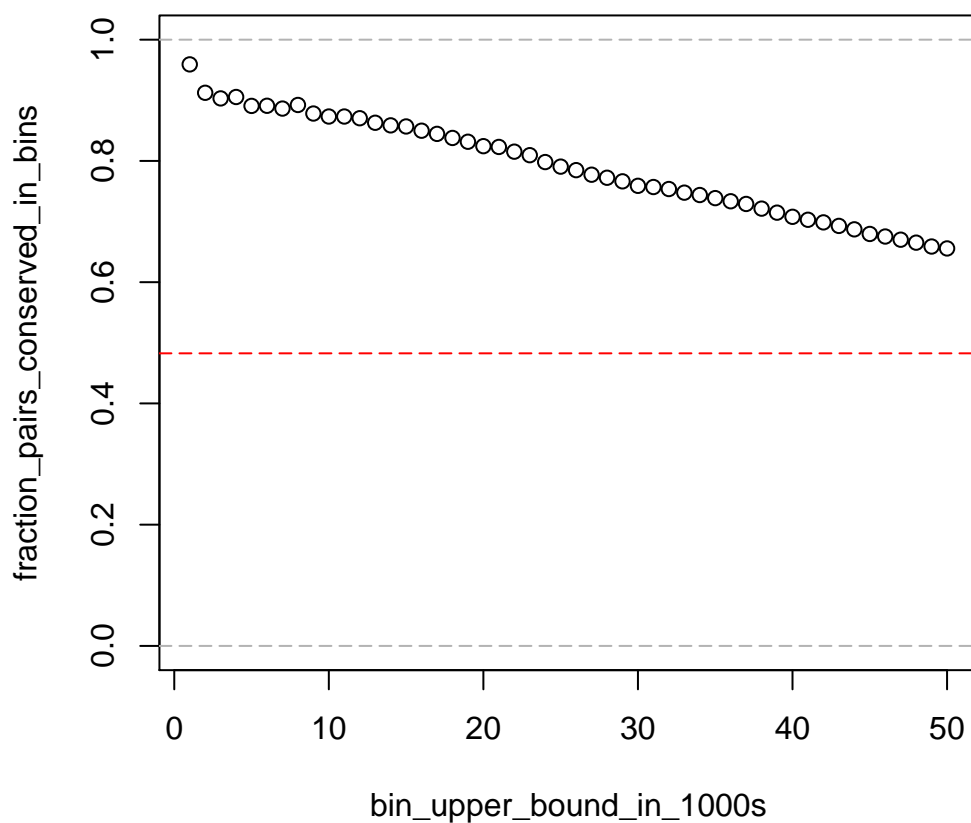

Supplement: s1 [file s1]

**Bin\_conservation\_minus\_bg\_AP110A\_vs\_ATCV1**  
**PD-0.46191**

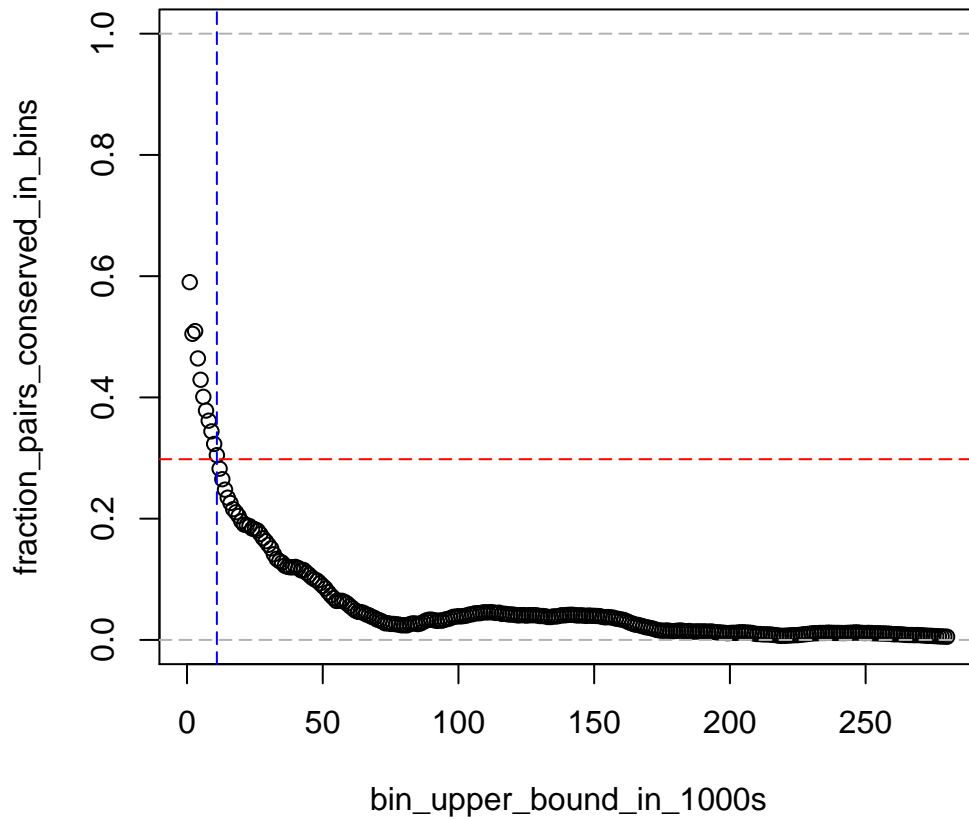

**Bin\_conservation\_minus\_bg\_AP110A\_vs\_ATCV1**  
**PD-0.46191**

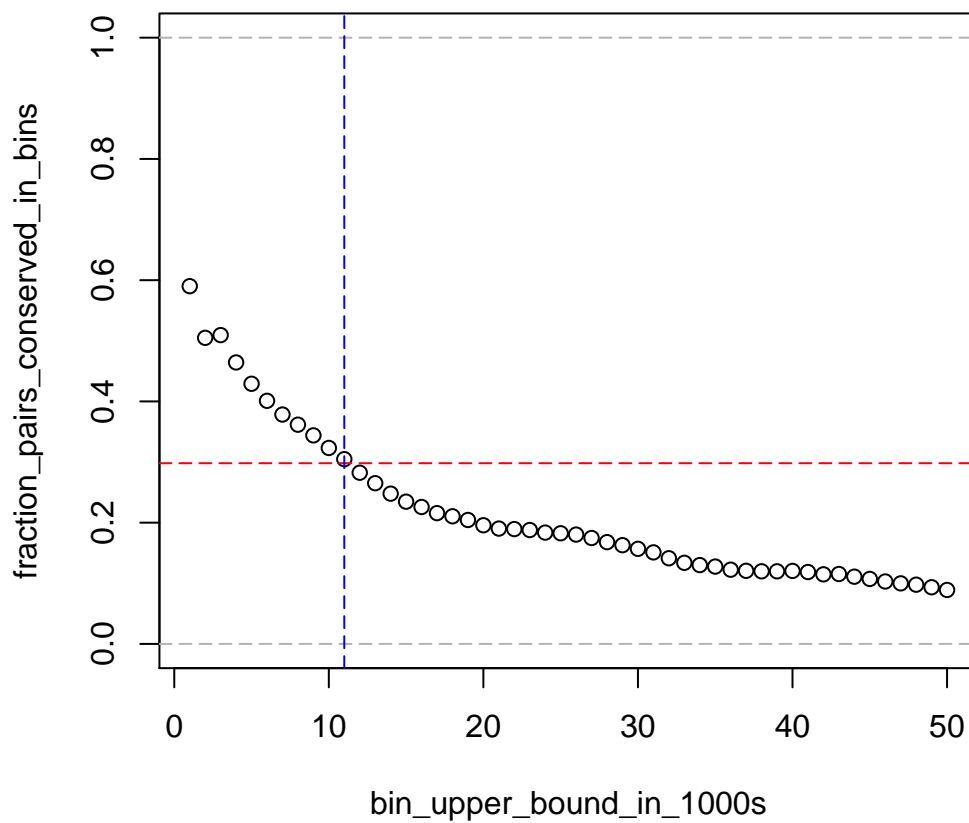

Supplement: s1 [file s1]

**Bin\_conservation\_minus\_bg\_Can18-4\_vs\_IL-3A**  
**PD-0.648861**

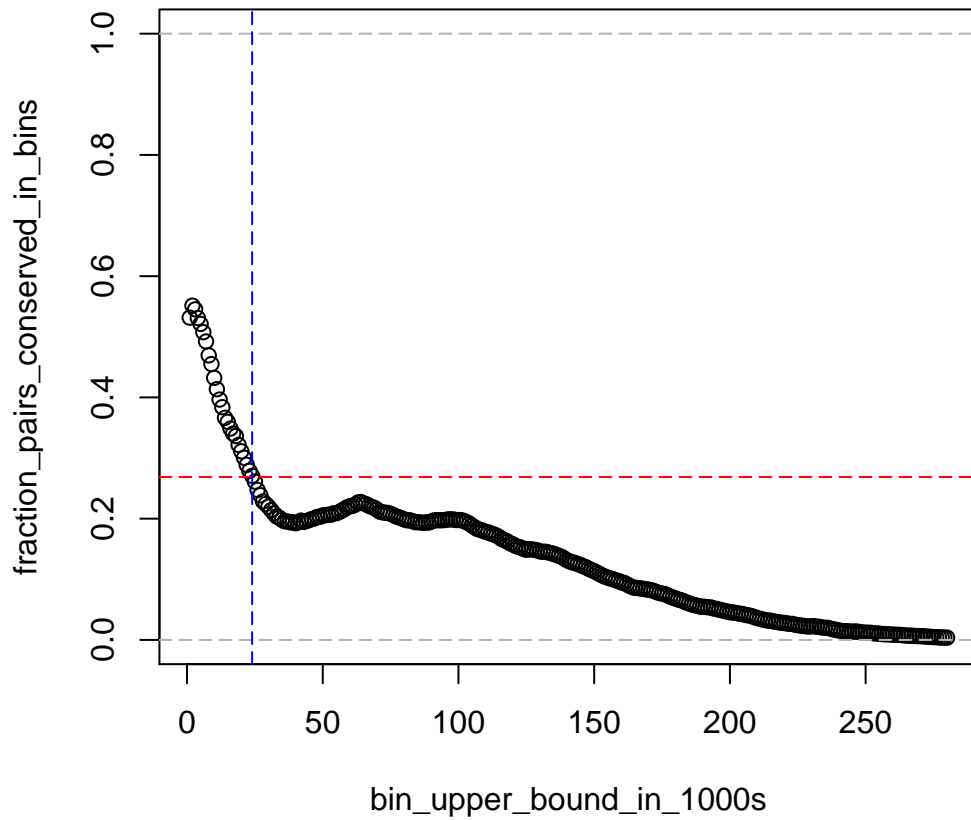

**Bin\_conservation\_minus\_bg\_Can18-4\_vs\_IL-3A**  
**PD-0.648861**

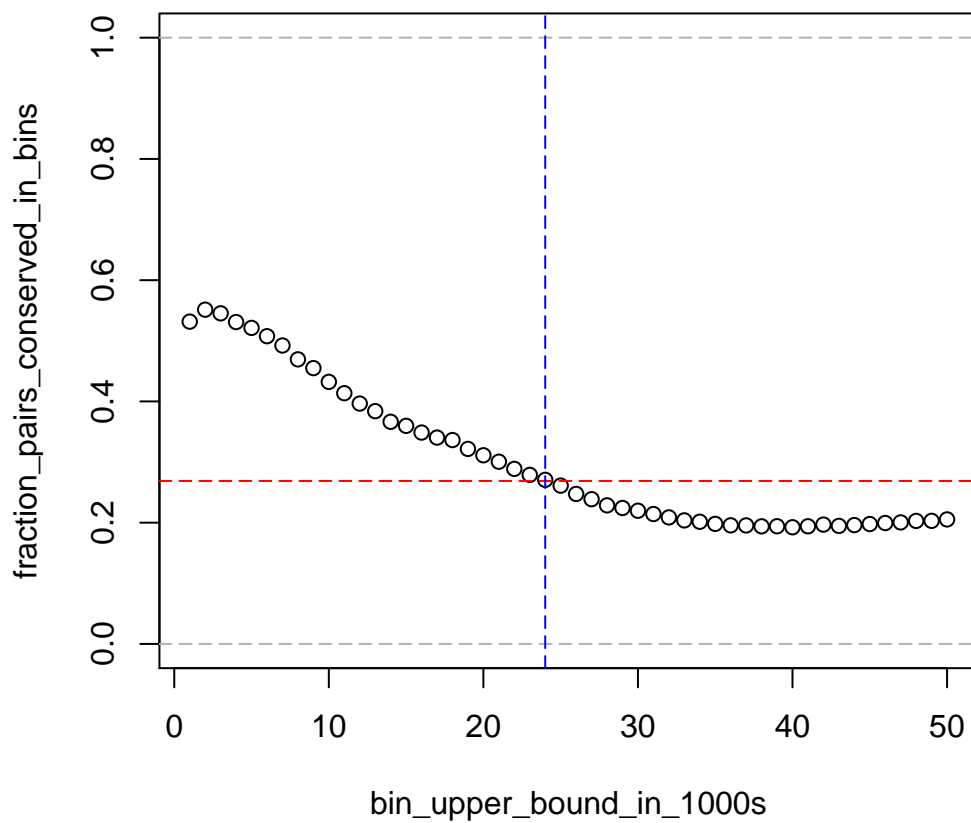

Supplement: s1 [file s1]

**Bin\_conservation\_minus\_bg\_FR483\_vs\_GM0701.1**  
**PD-0.454798**

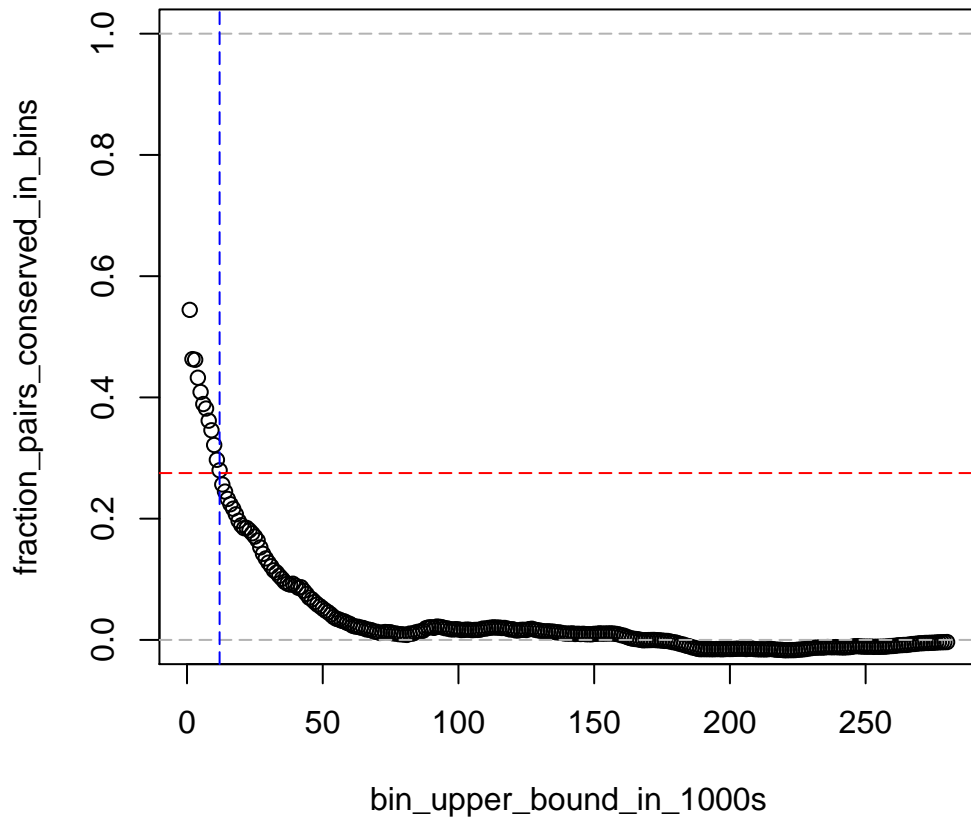

**Bin\_conservation\_minus\_bg\_FR483\_vs\_GM0701.1**  
**PD-0.454798**

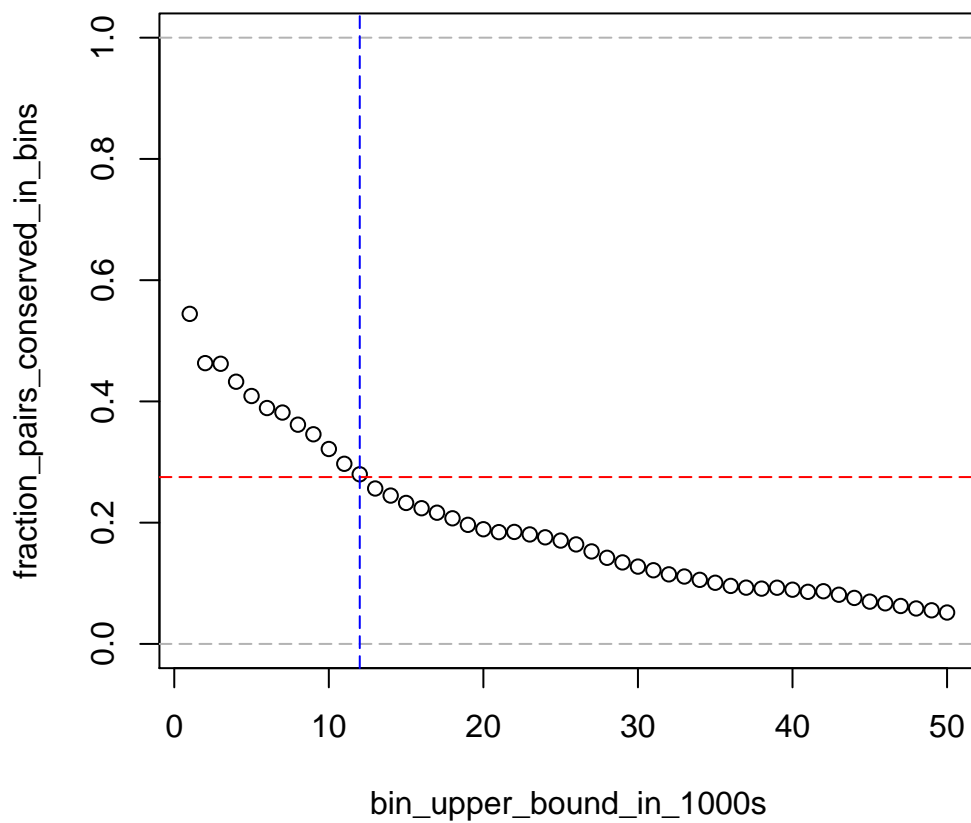

Supplement: s1 [file s1]

**Bin\_conservation\_minus\_bg\_CVG-1\_vs\_OR0704.2.2**  
**PD-0.037804**

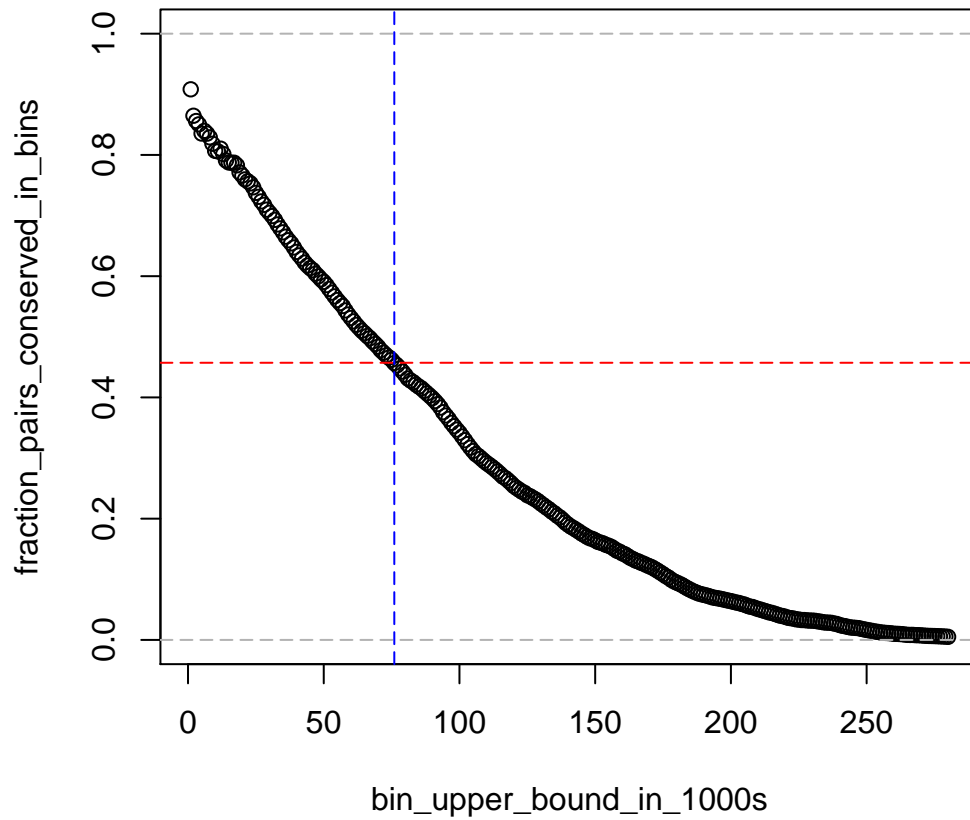

**Bin\_conservation\_minus\_bg\_CVG-1\_vs\_OR0704.2.2**  
**PD-0.037804**

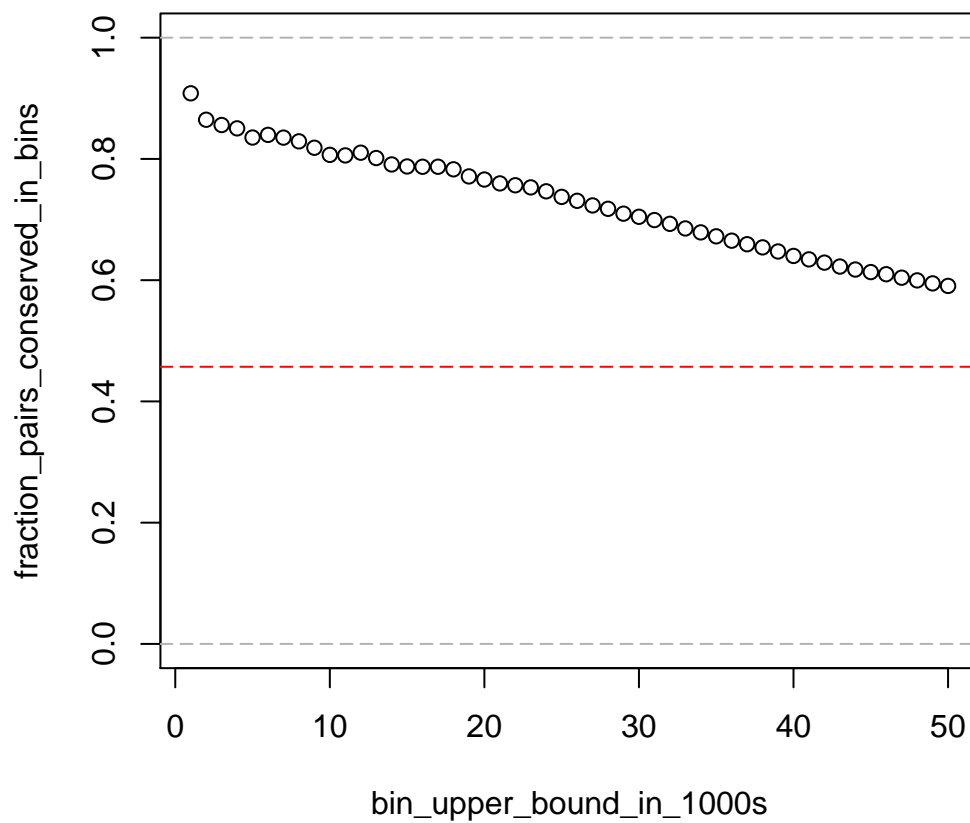

Supplement: s1 [file s1]

**Bin\_conservation\_minus\_bg\_Br0604L\_vs\_Fr5L**  
**PD-0.448488**

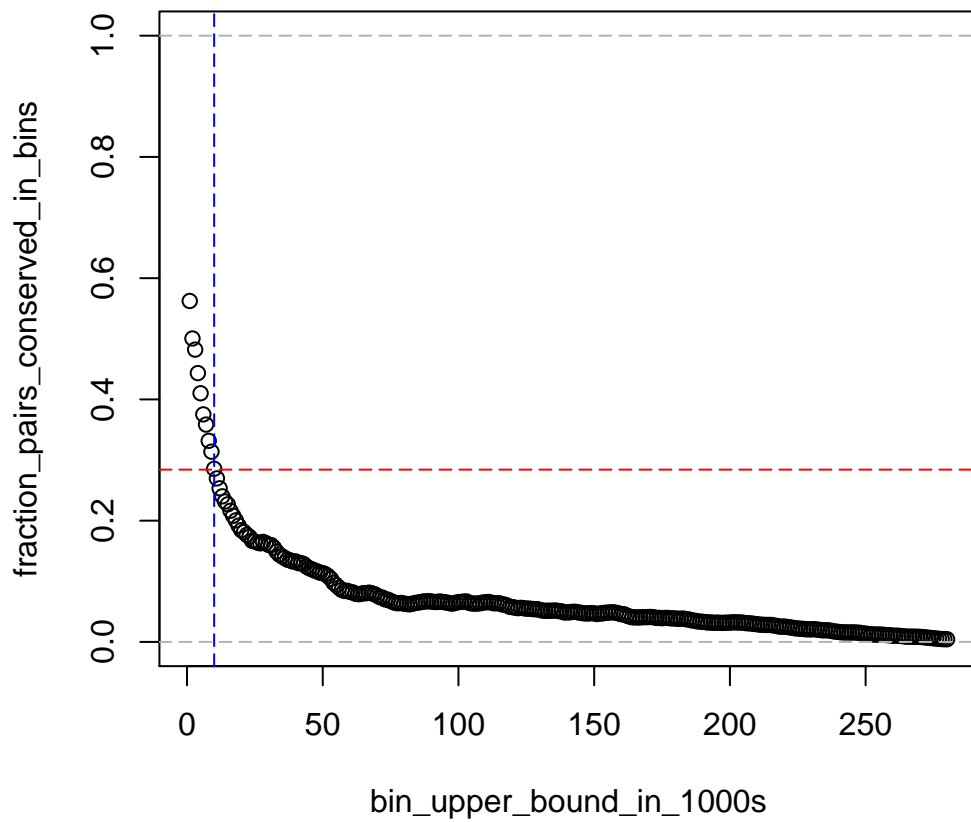

**Bin\_conservation\_minus\_bg\_Br0604L\_vs\_Fr5L**  
**PD-0.448488**

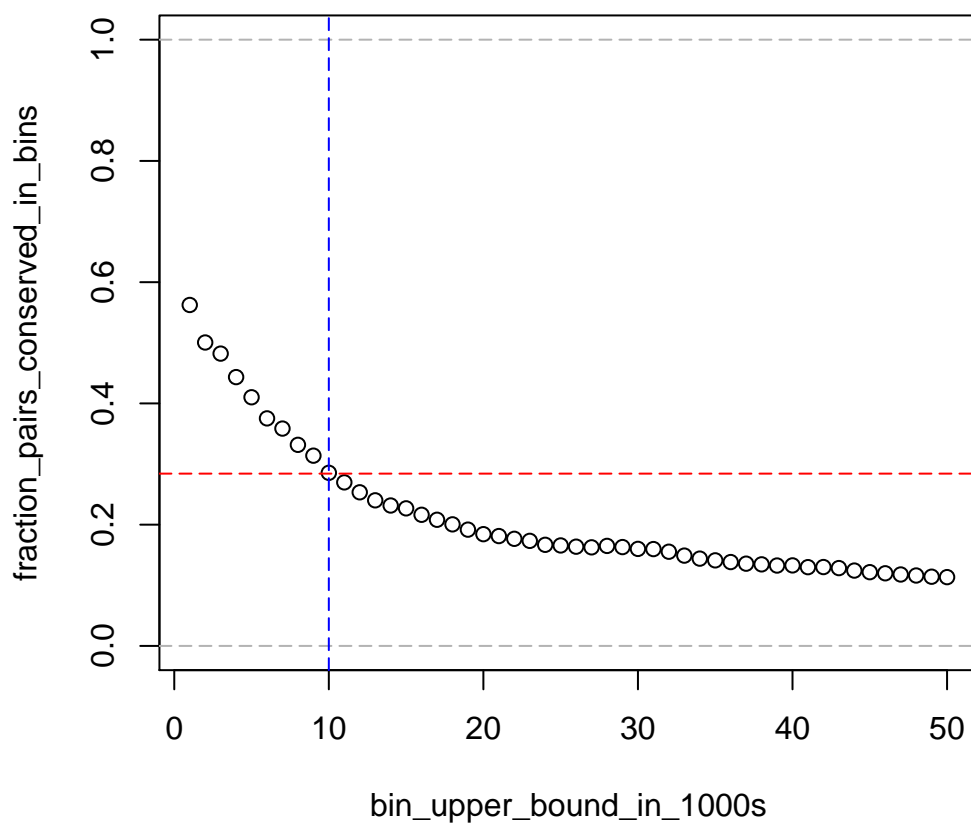

Supplement: s1 [file s1]

**Bin\_conservation\_minus\_bg\_MA-1E\_vs\_NW665.2**  
**PD-0.655812**

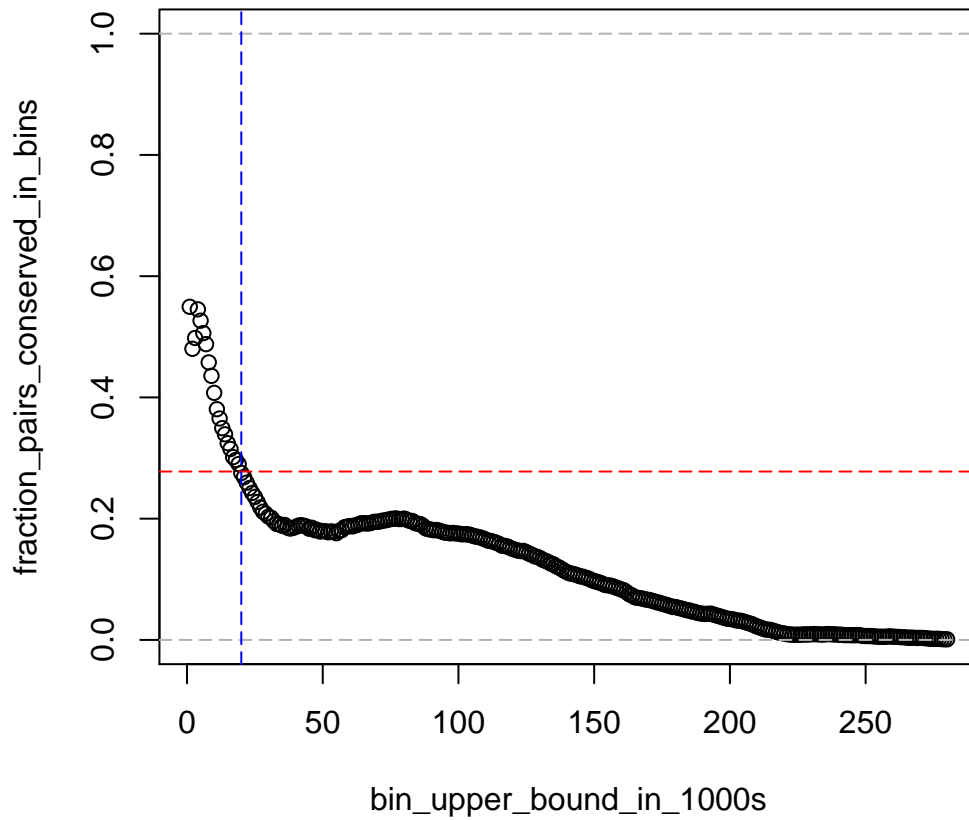

**Bin\_conservation\_minus\_bg\_MA-1E\_vs\_NW665.2**  
**PD-0.655812**

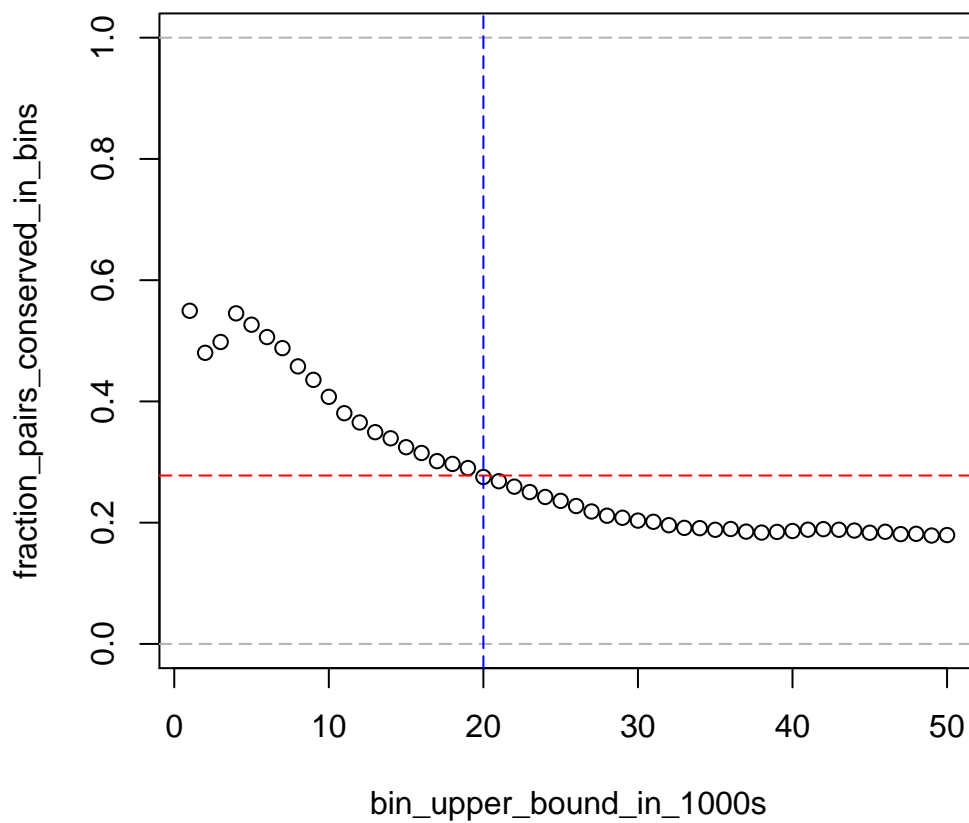

Supplement: s1 [file s1]

**Bin\_conservation\_minus\_bg\_GM0701.1\_vs\_PBCV1**  
**PD-0.66647**

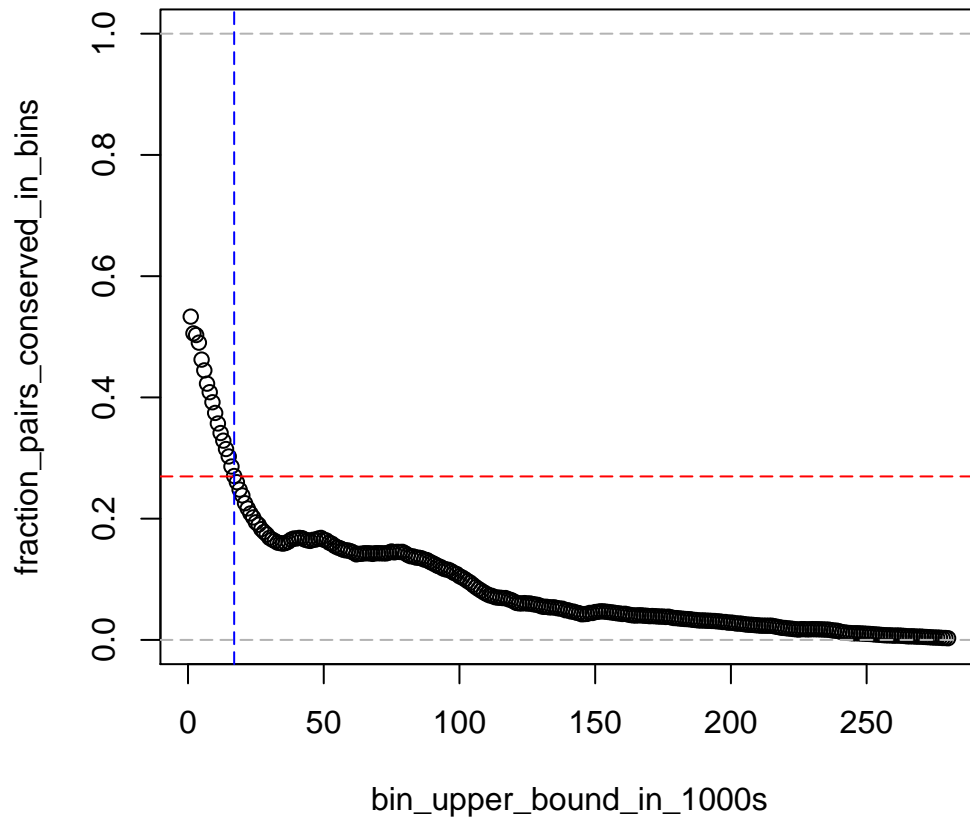

**Bin\_conservation\_minus\_bg\_GM0701.1\_vs\_PBCV1**  
**PD-0.66647**

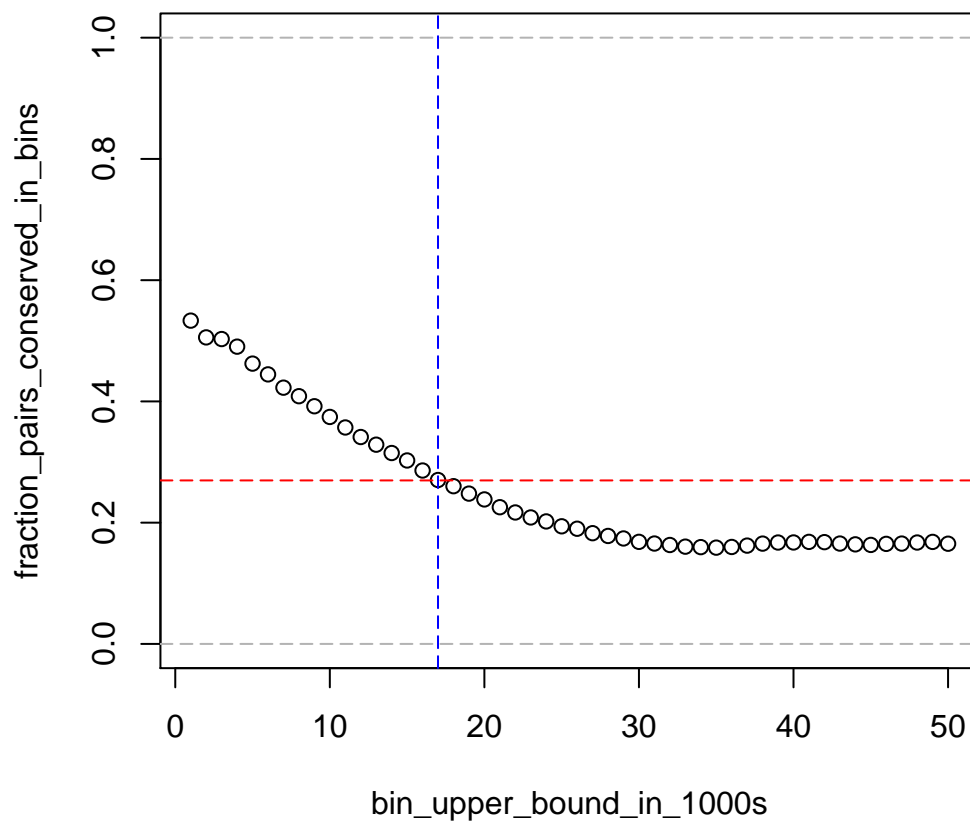

Supplement: s1 [file s1]

**Bin\_conservation\_minus\_bg\_IL-3A\_vs\_NYs-1**  
**PD-0.134519**

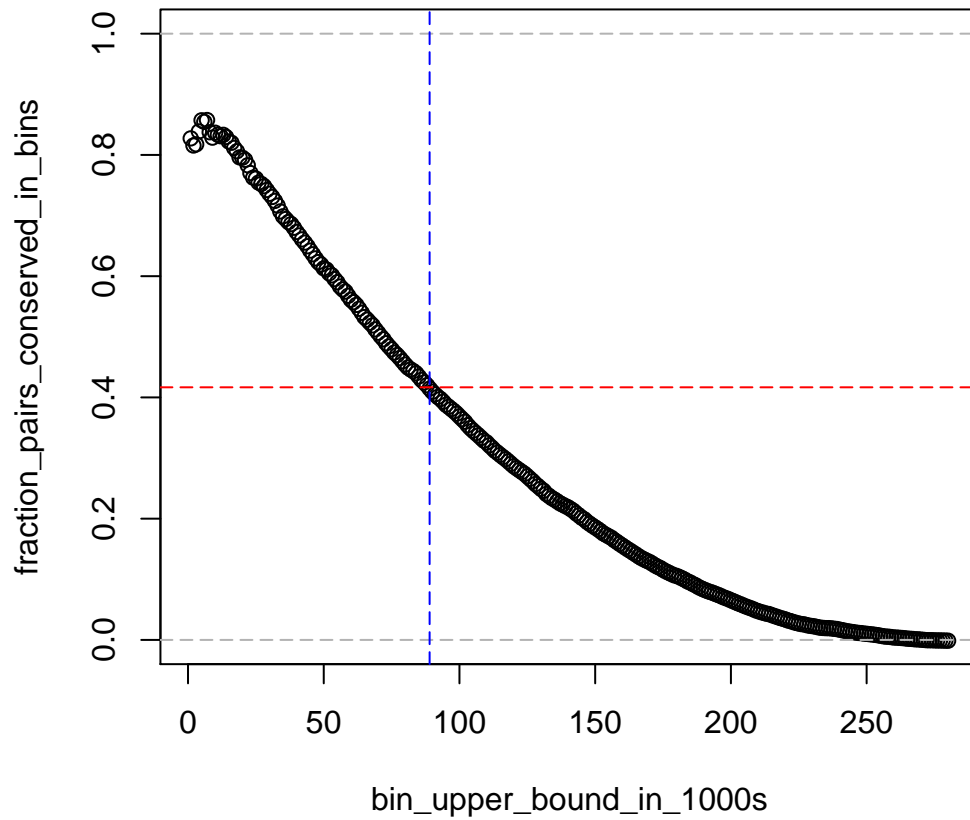

**Bin\_conservation\_minus\_bg\_IL-3A\_vs\_NYs-1**  
**PD-0.134519**

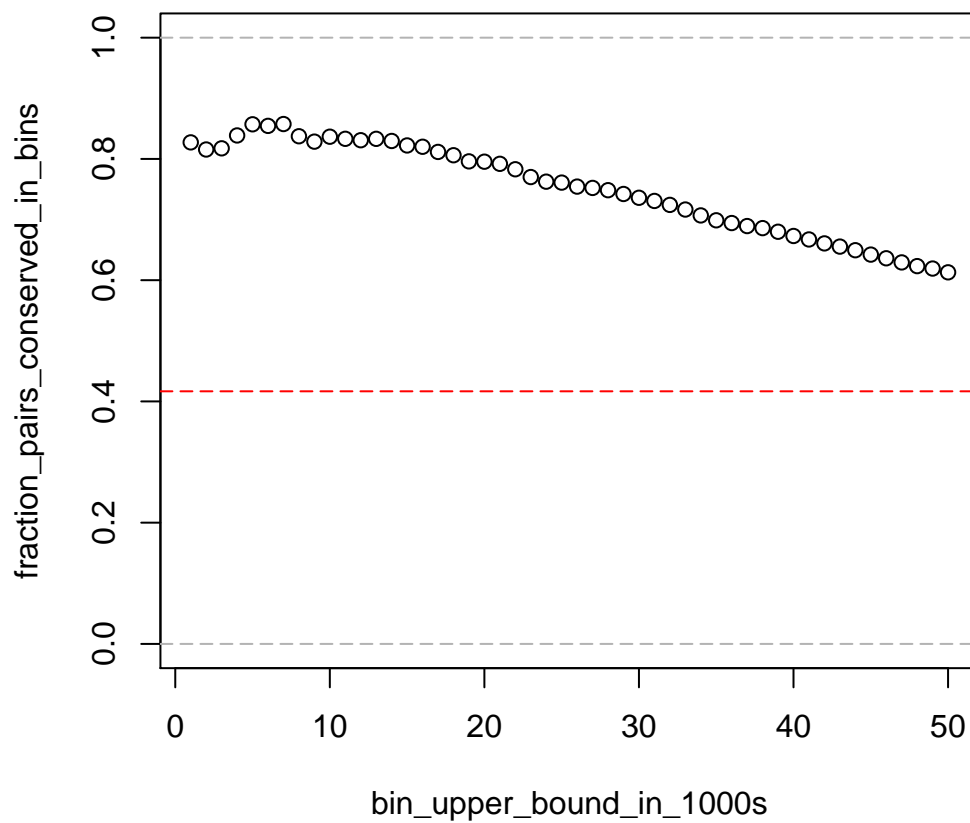

Supplement: s1 [file s1]

**Bin\_conservation\_minus\_bg\_CvsA1\_vs\_NY-2B**  
**PD-0.150665**

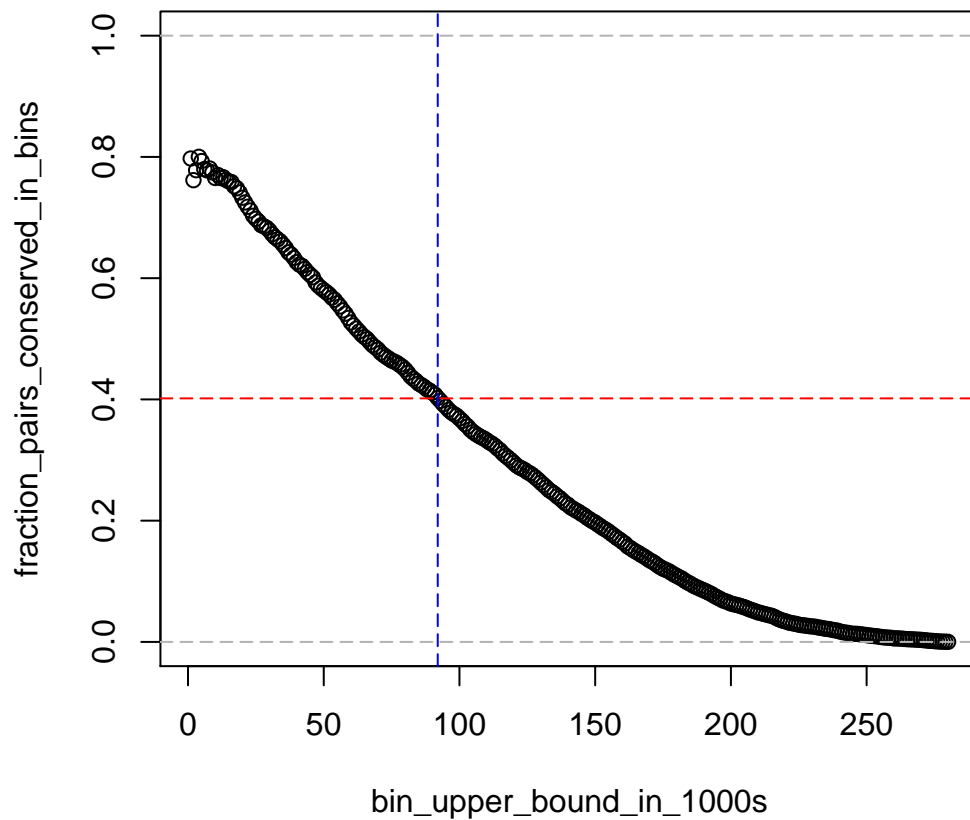

**Bin\_conservation\_minus\_bg\_CvsA1\_vs\_NY-2B**  
**PD-0.150665**

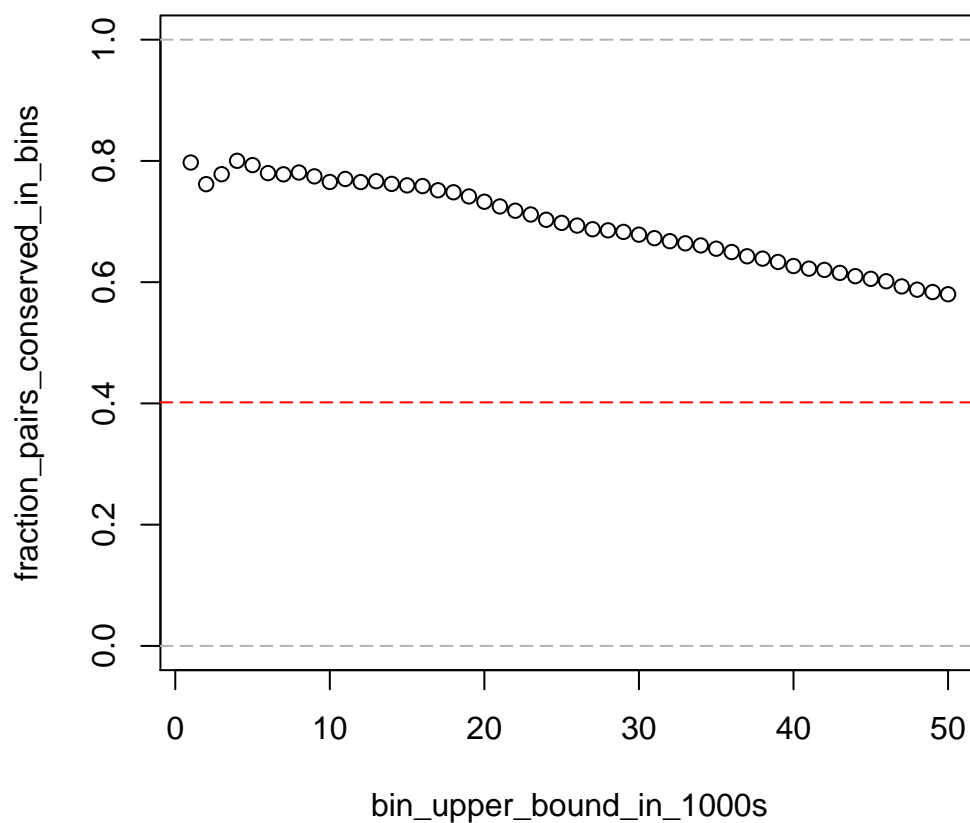

Supplement: s1 [file s1]

**Bin\_conservation\_minus\_bg\_NE-JV-1\_vs\_NY2A**  
**PD-0.701701**

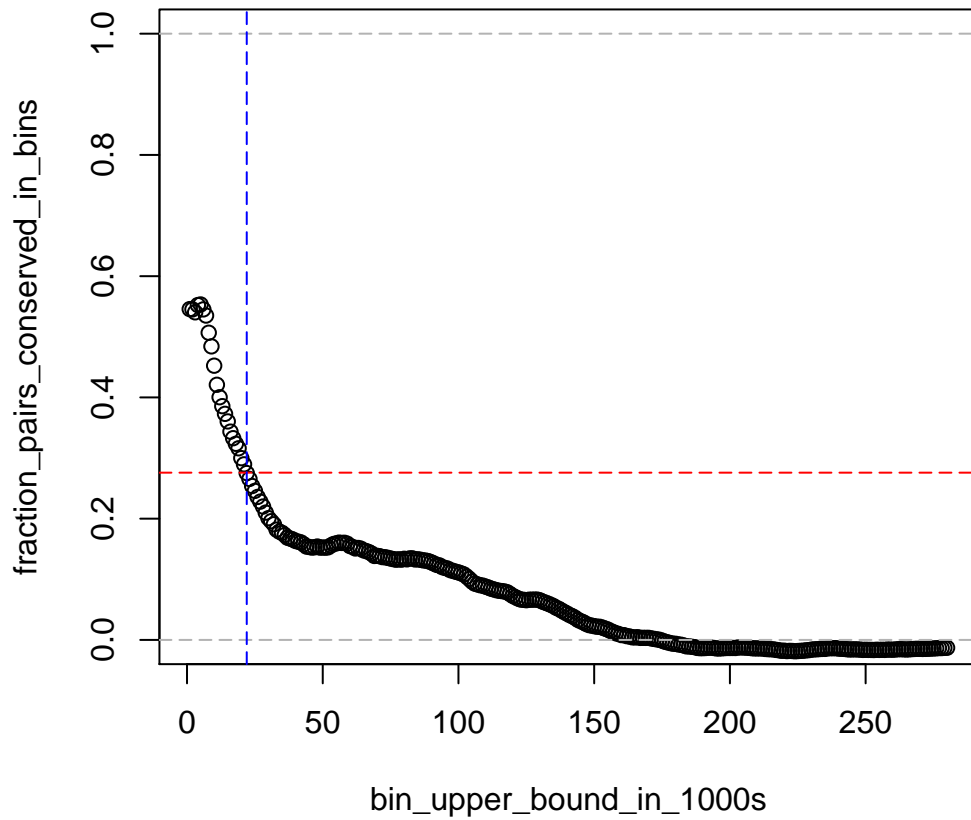

**Bin\_conservation\_minus\_bg\_NE-JV-1\_vs\_NY2A**  
**PD-0.701701**

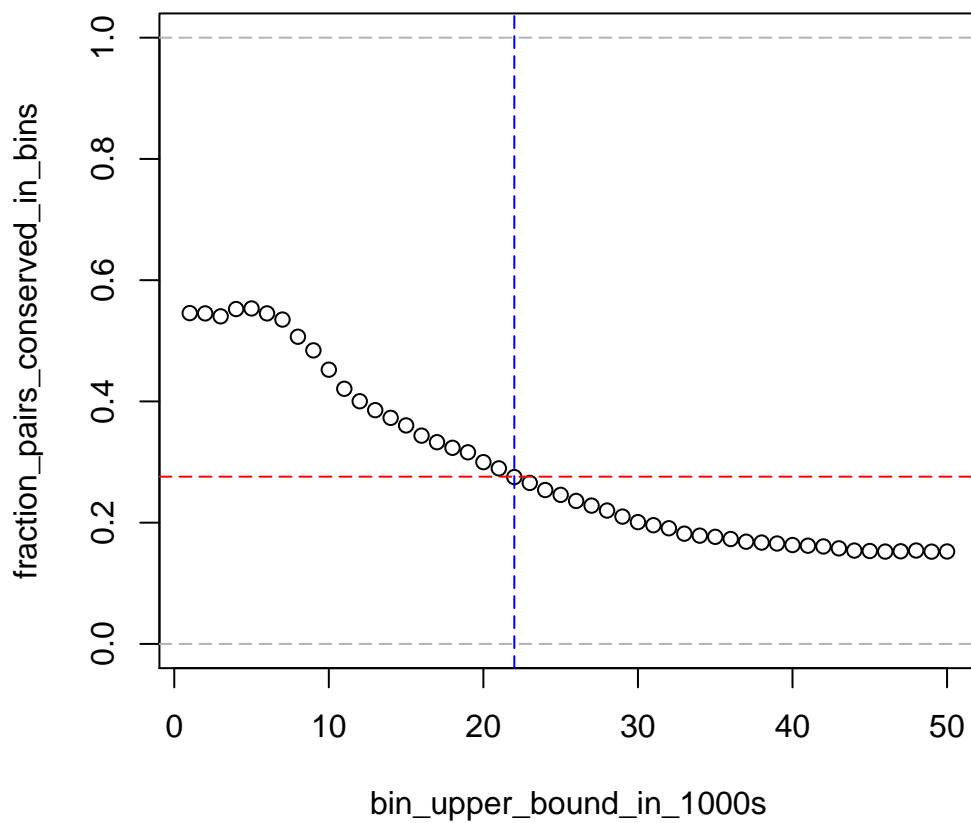

Supplement: s1 [file s1]

**Bin\_conservation\_minus\_bg\_MN0810.1\_vs\_MT325**  
**PD-0.456764**

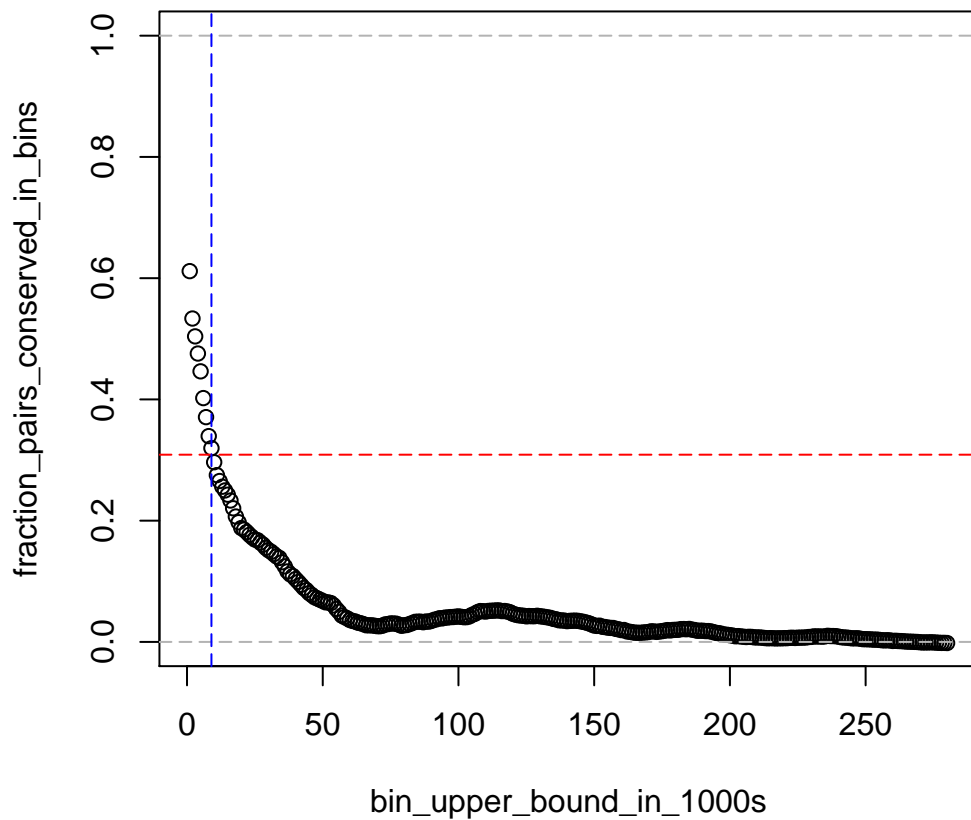

**Bin\_conservation\_minus\_bg\_MN0810.1\_vs\_MT325**  
**PD-0.456764**

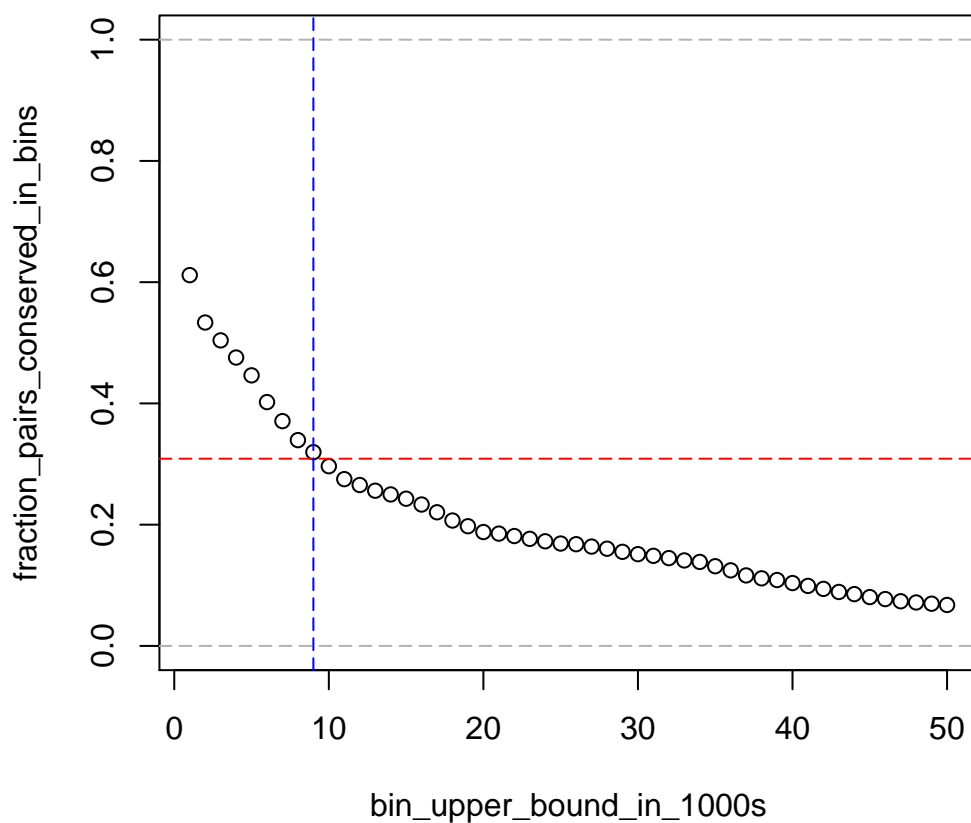

Supplement: s1 [file s1]

**Bin\_conservation\_minus\_bg\_CVB-1\_vs\_CZ-2**  
**PD-0.057484**

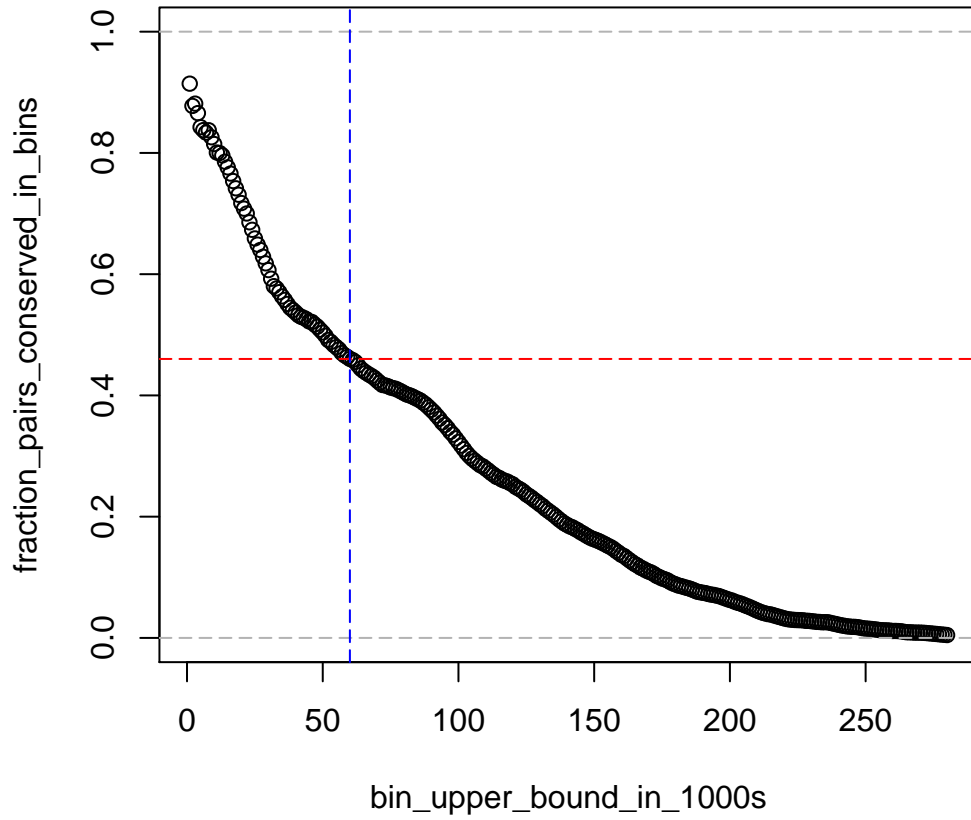

**Bin\_conservation\_minus\_bg\_CVB-1\_vs\_CZ-2**  
**PD-0.057484**

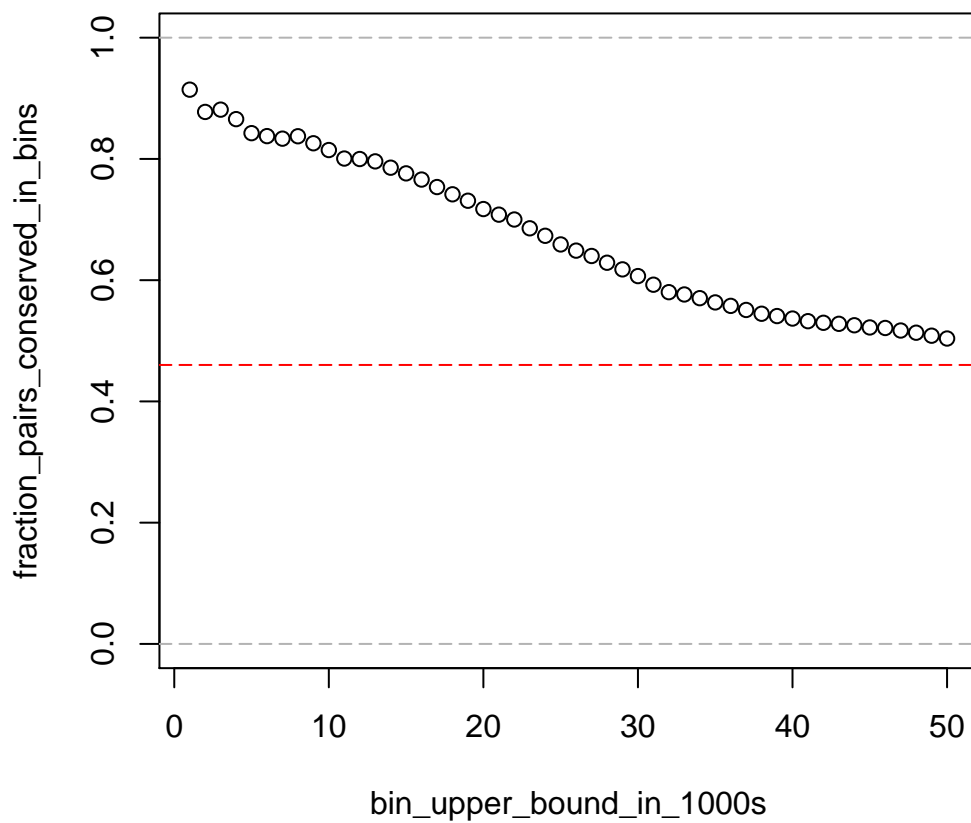

Supplement: s1 [file s1]

**Bin\_conservation\_minus\_bg\_FR483\_vs\_MA-1E**  
**PD-0.657669**

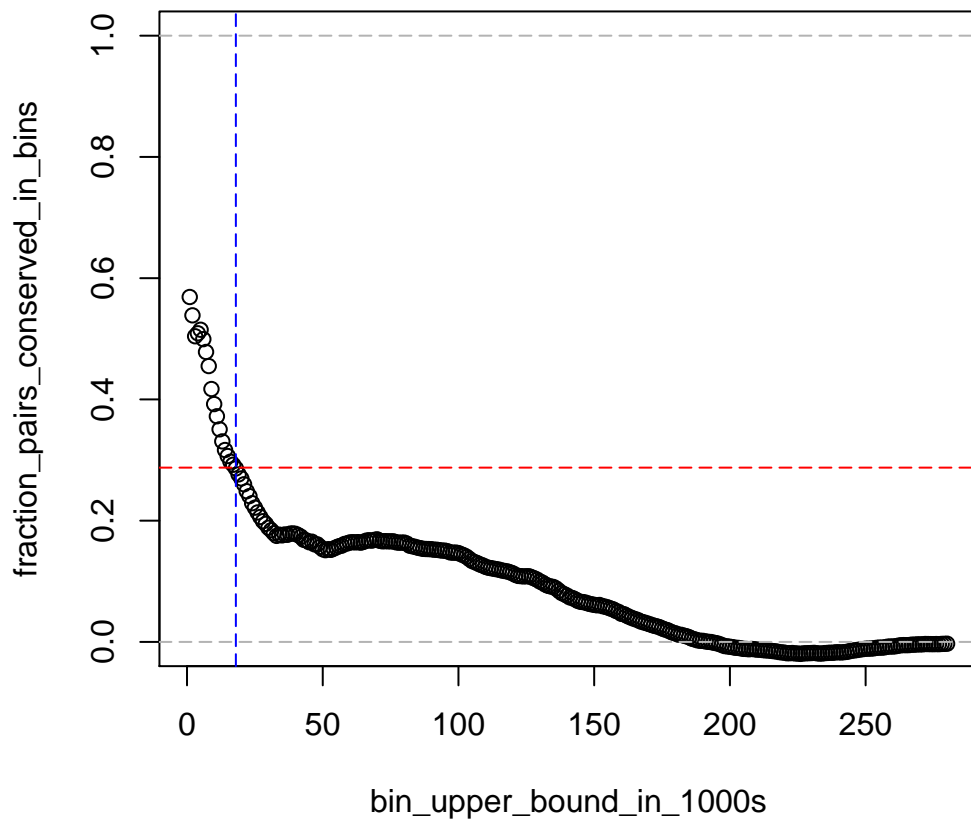

**Bin\_conservation\_minus\_bg\_FR483\_vs\_MA-1E**  
**PD-0.657669**

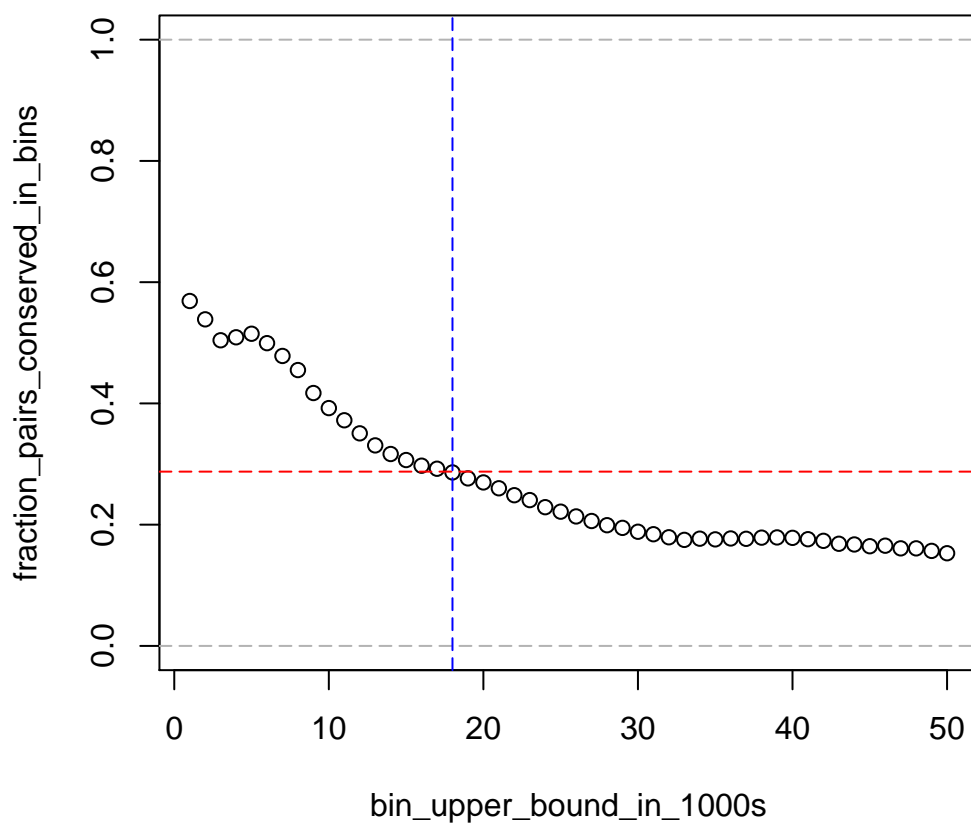

Supplement: s1 [file s1]

**Bin\_conservation\_minus\_bg\_MA-1D\_vs\_OR0704.3**  
**PD-0.701095**

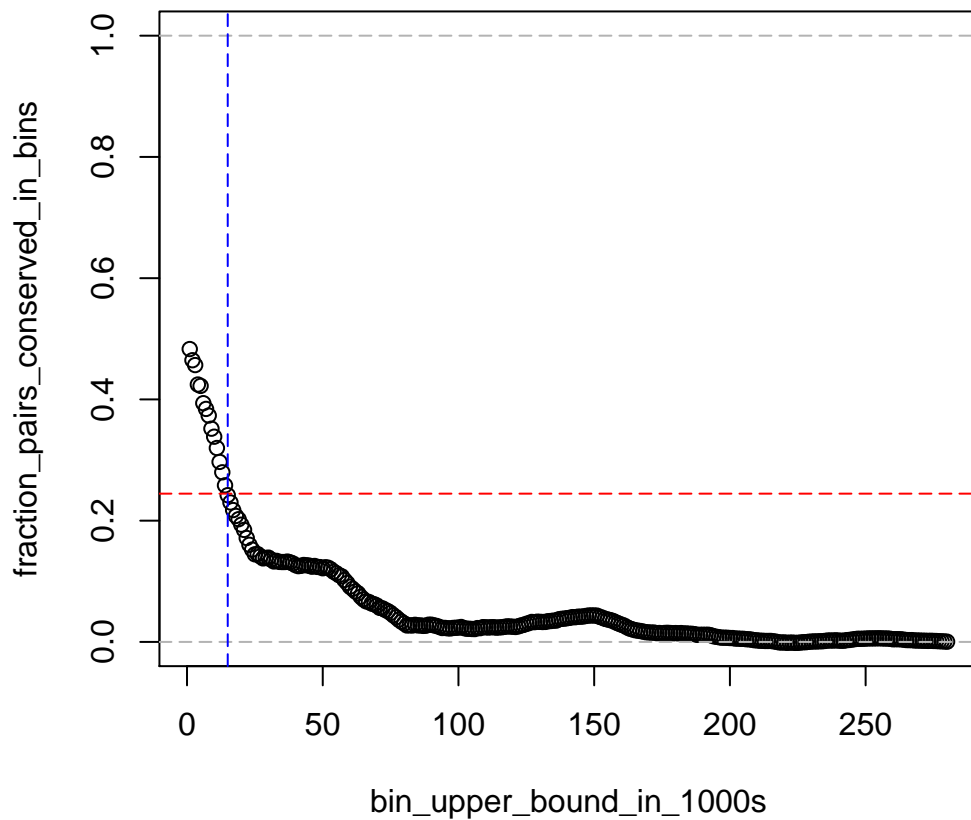

**Bin\_conservation\_minus\_bg\_MA-1D\_vs\_OR0704.3**  
**PD-0.701095**

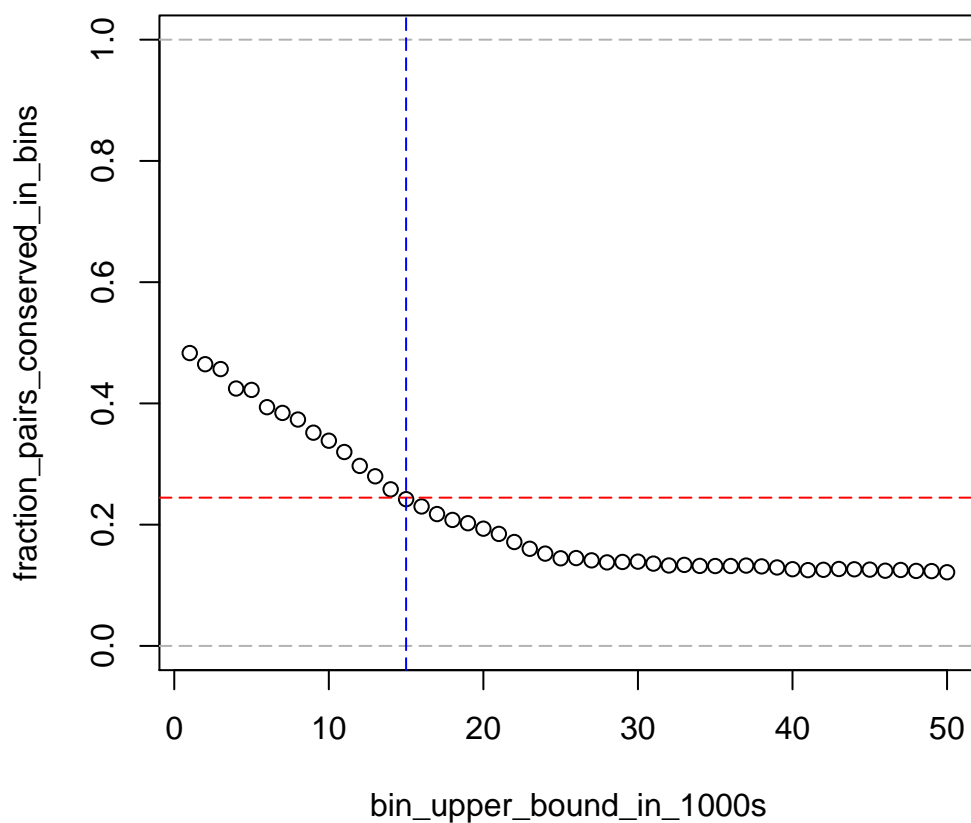

Supplement: s1 [file s1]

**Bin\_conservation\_minus\_bg\_Can0610SP\_vs\_GM0701.1**  
**PD-0.062065**

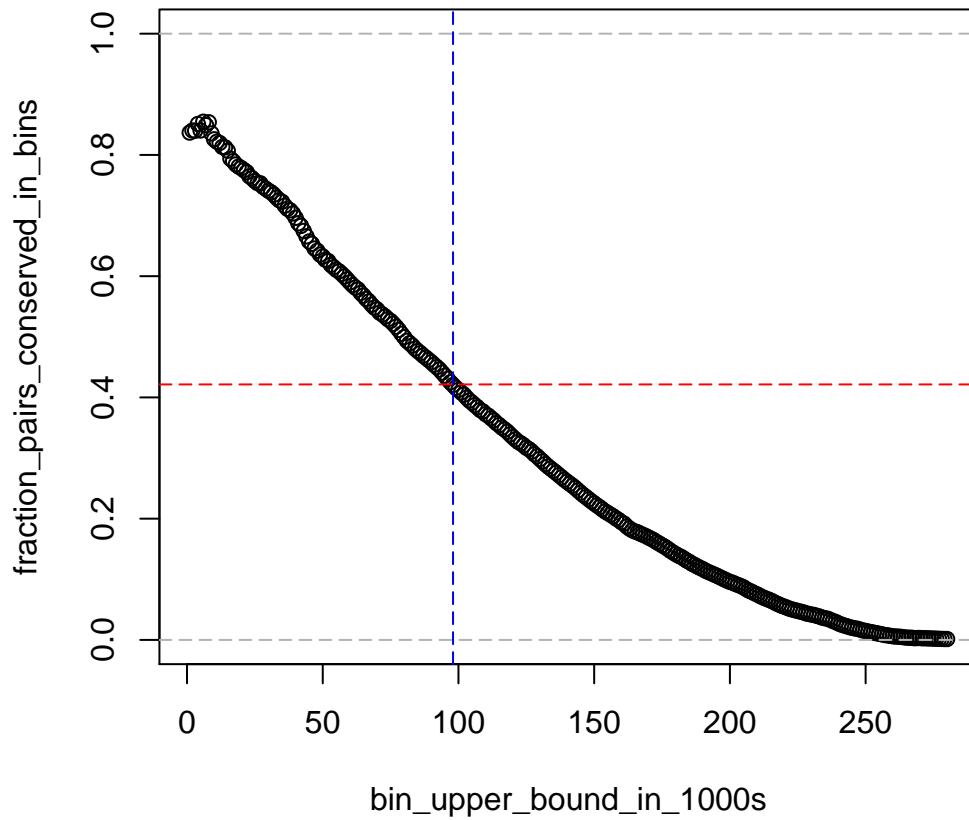

**Bin\_conservation\_minus\_bg\_Can0610SP\_vs\_GM0701.1**  
**PD-0.062065**

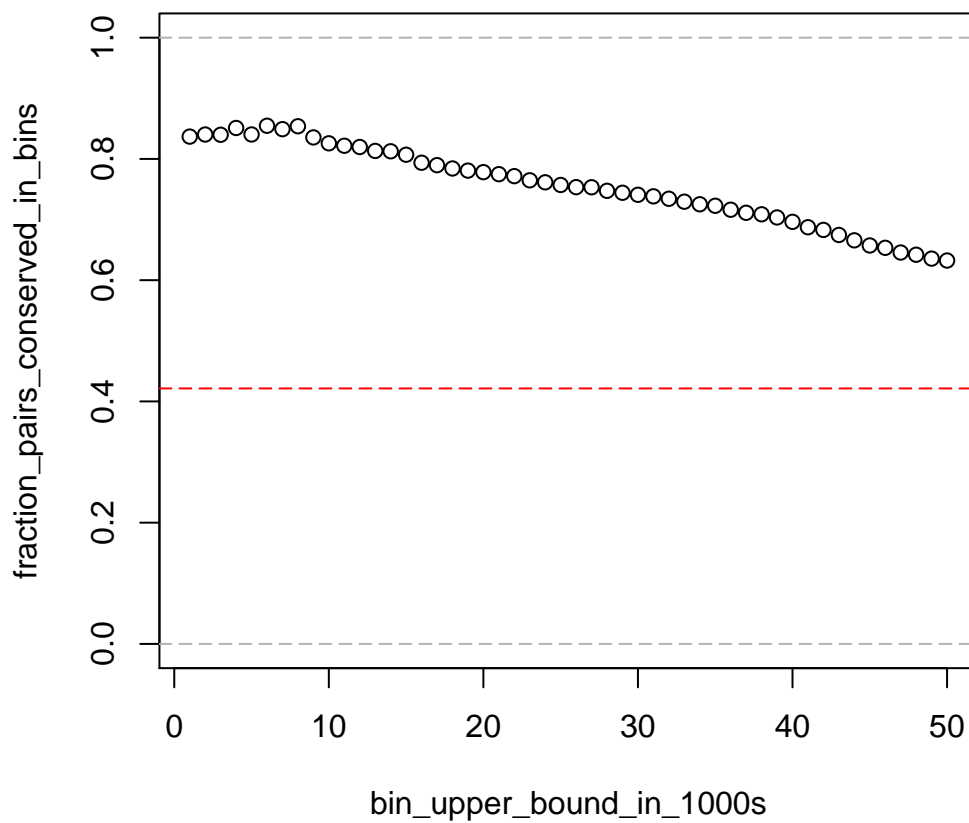

Supplement: s1 [file s1]

**Bin\_conservation\_minus\_bg\_AN69C\_vs\_FR483**  
**PD-0.6412**

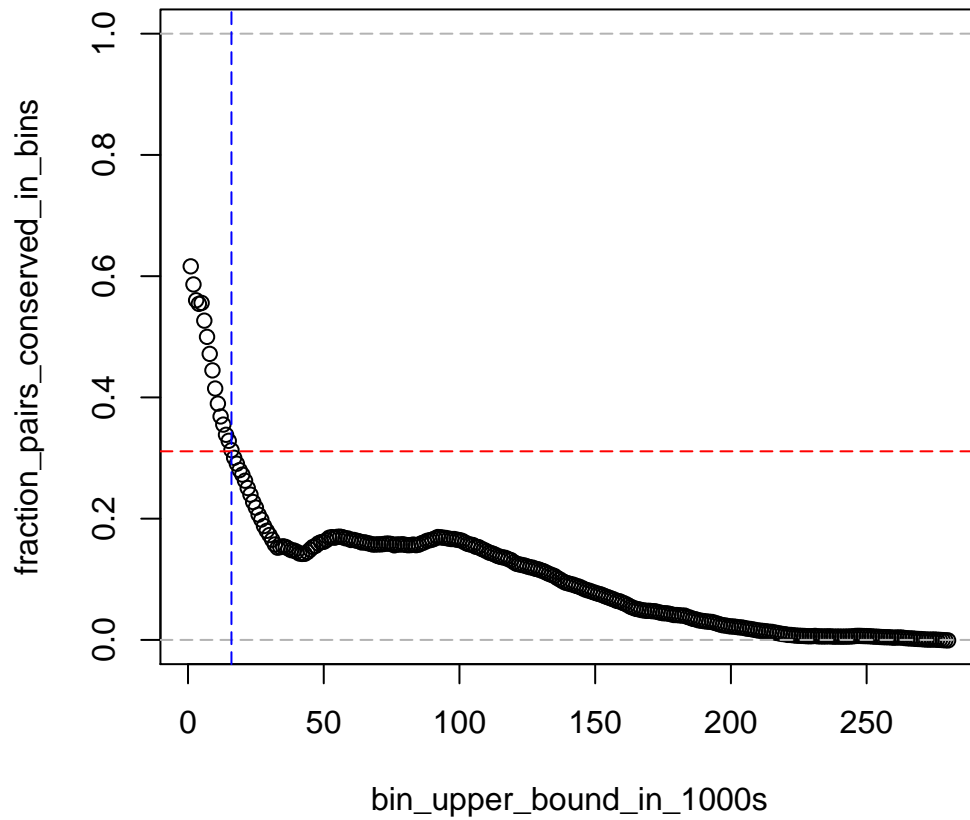

**Bin\_conservation\_minus\_bg\_AN69C\_vs\_FR483**  
**PD-0.6412**

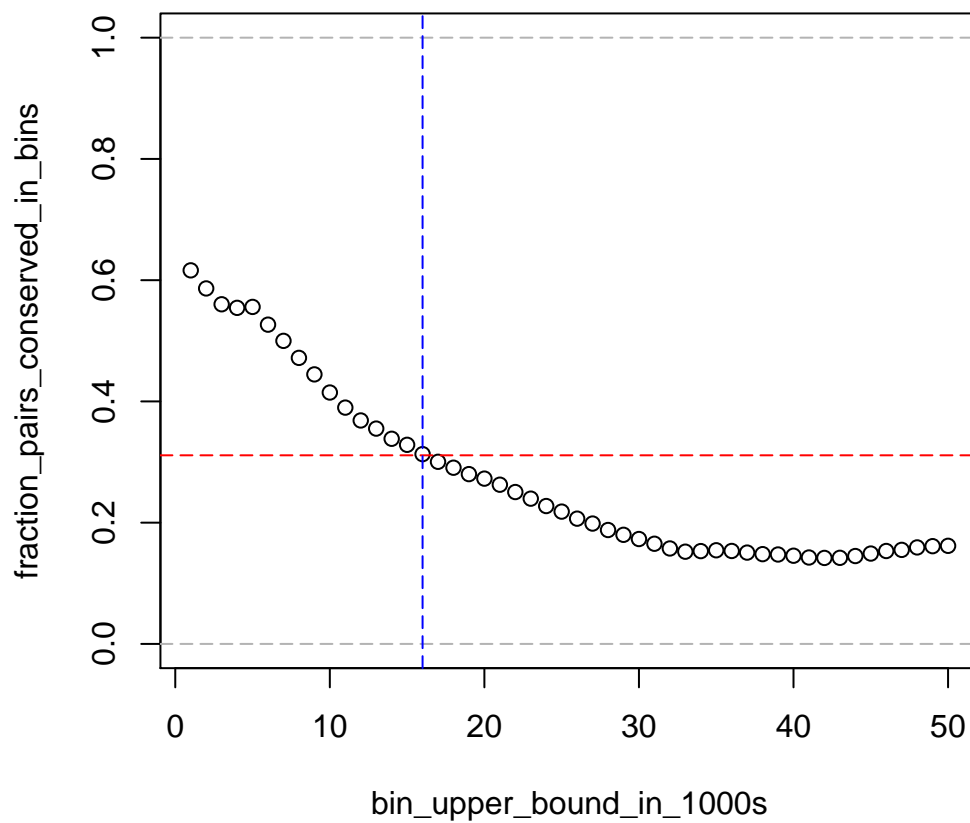

Supplement: s1 [file s1]

**Bin\_conservation\_minus\_bg\_CvsA1\_vs\_NE-JV-4**  
**PD-0.014634**

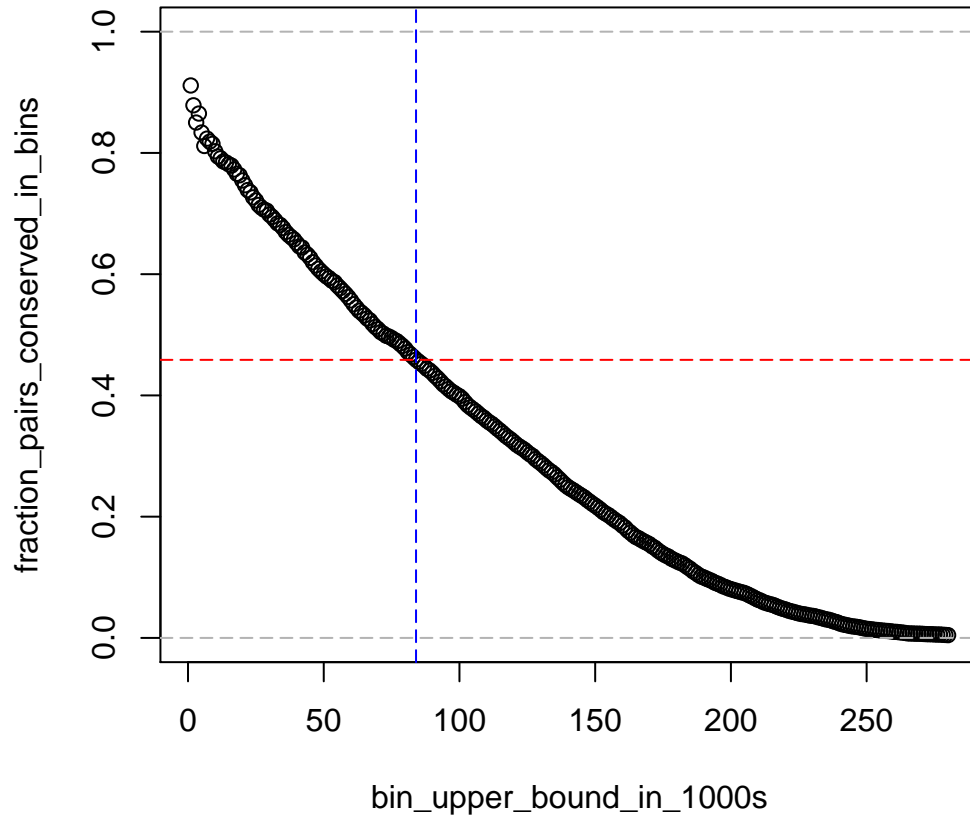

**Bin\_conservation\_minus\_bg\_CvsA1\_vs\_NE-JV-4**  
**PD-0.014634**

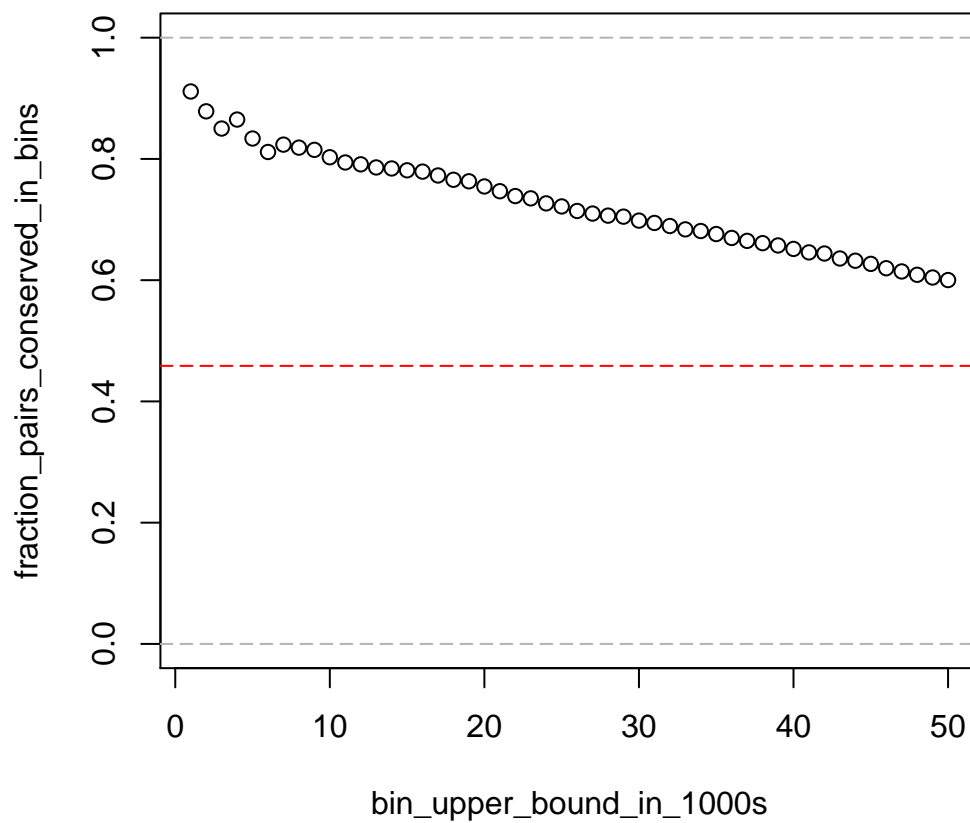

Supplement: s1 [file s1]

**Bin\_conservation\_minus\_bg\_NE-JV-3\_vs\_OR0704.3**  
**PD-0.020428**

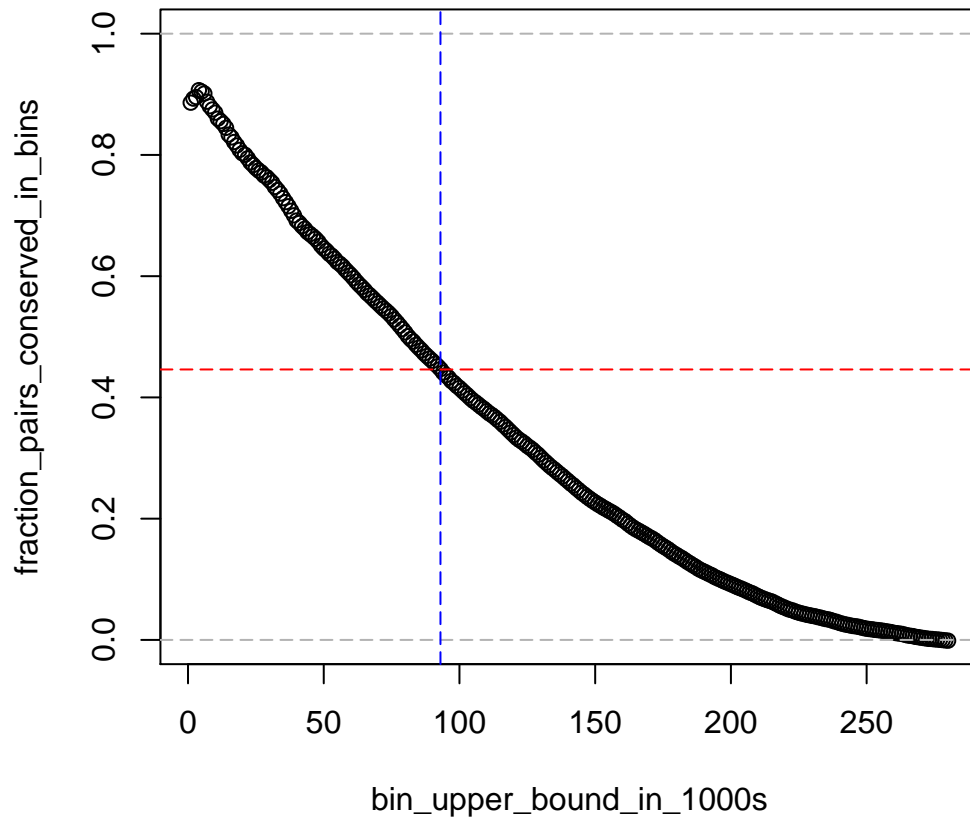

**Bin\_conservation\_minus\_bg\_NE-JV-3\_vs\_OR0704.3**  
**PD-0.020428**

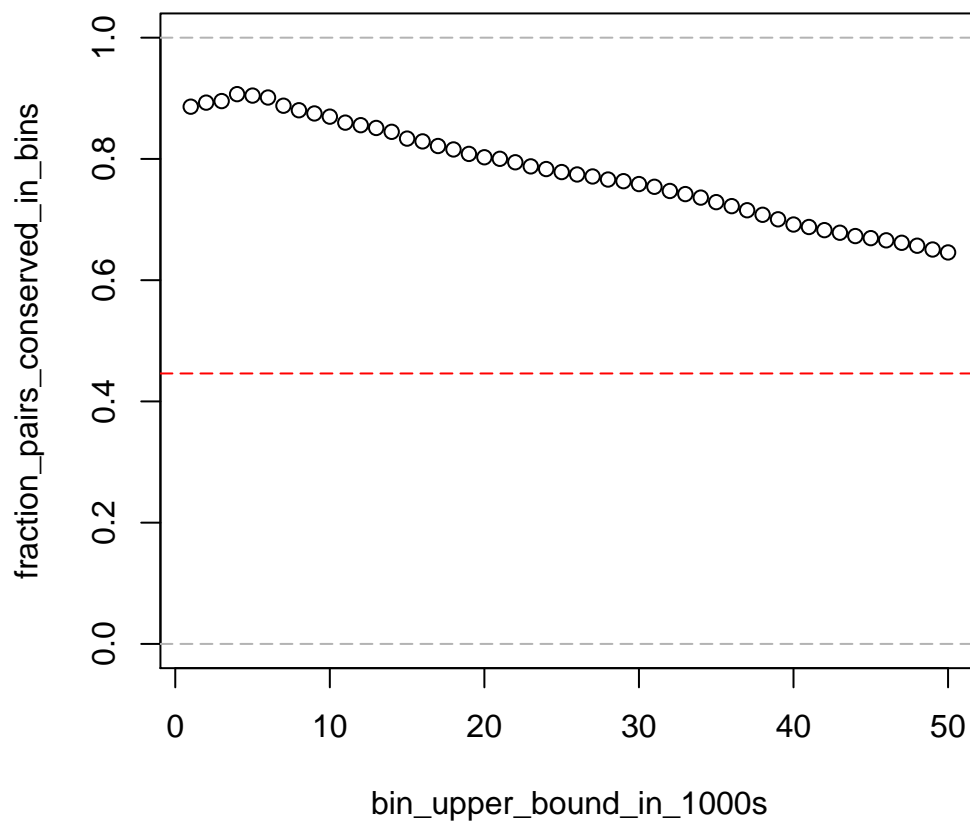

Supplement: s1 [file s1]

**Bin\_conservation\_minus\_bg\_NE-JV-1\_vs\_NYs-1**  
**PD-0.694445**

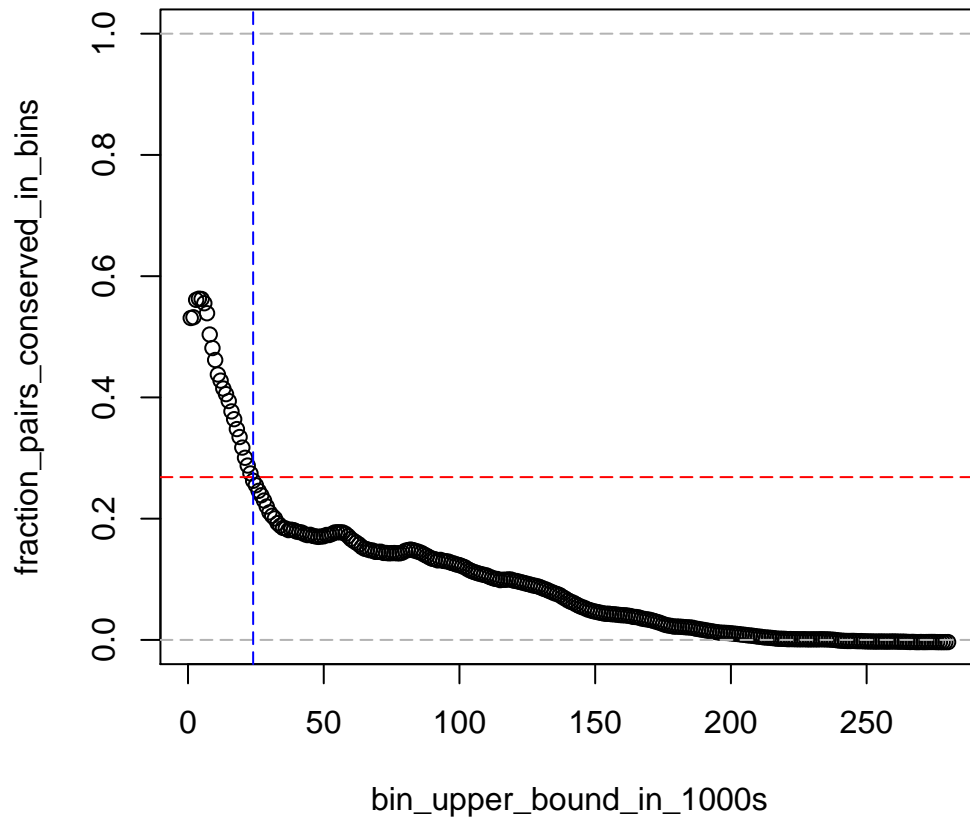

**Bin\_conservation\_minus\_bg\_NE-JV-1\_vs\_NYs-1**  
**PD-0.694445**

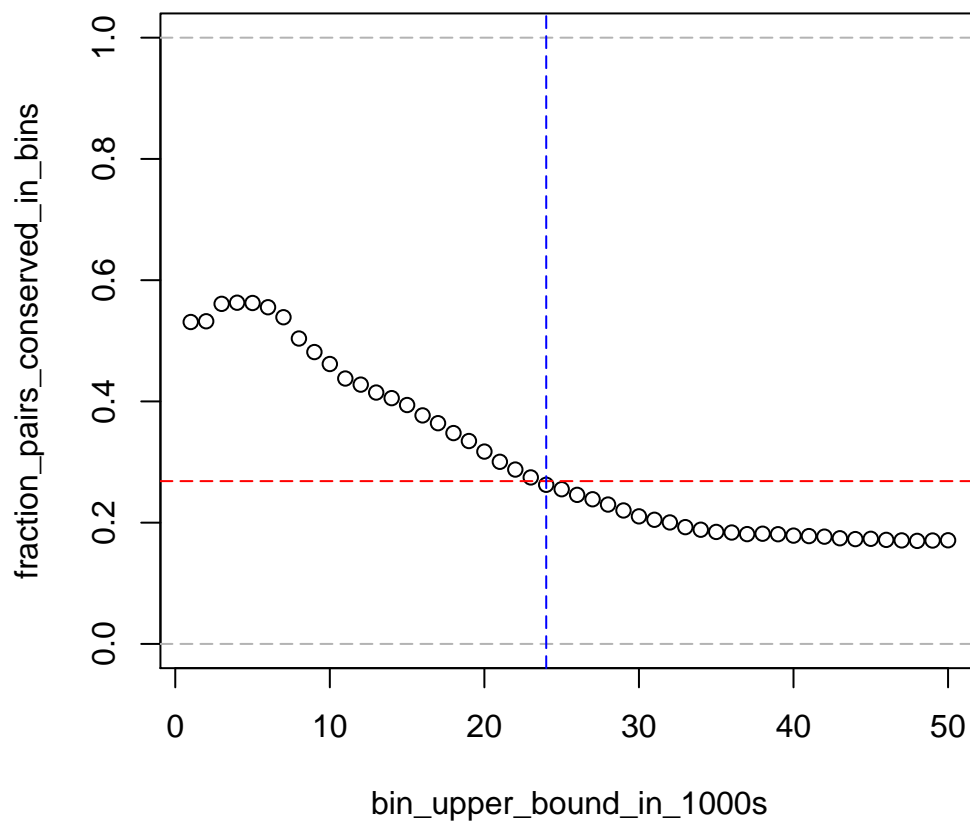

Supplement: s1 [file s1]

**Bin\_conservation\_minus\_bg\_CVM-1\_vs\_CZ-2**  
**PD-0.040983**

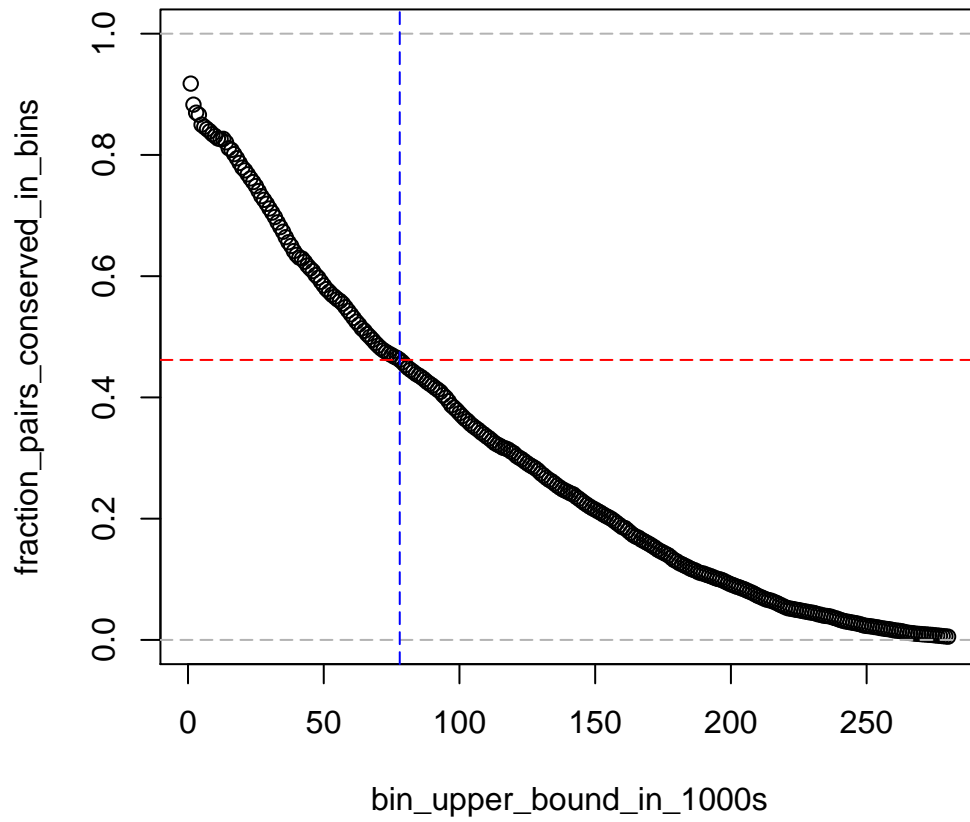

**Bin\_conservation\_minus\_bg\_CVM-1\_vs\_CZ-2**  
**PD-0.040983**

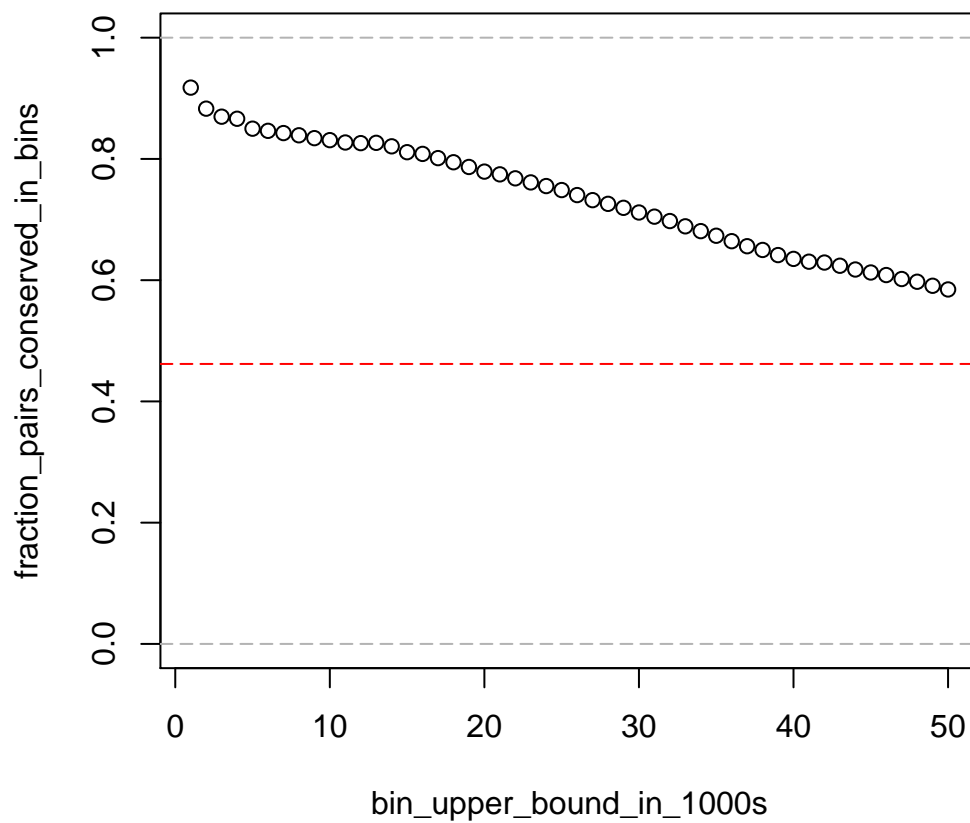

Supplement: s1 [file s1]

**Bin\_conservation\_minus\_bg\_IL-5-2s1\_vs\_WI0606**  
**PD-0.707389**

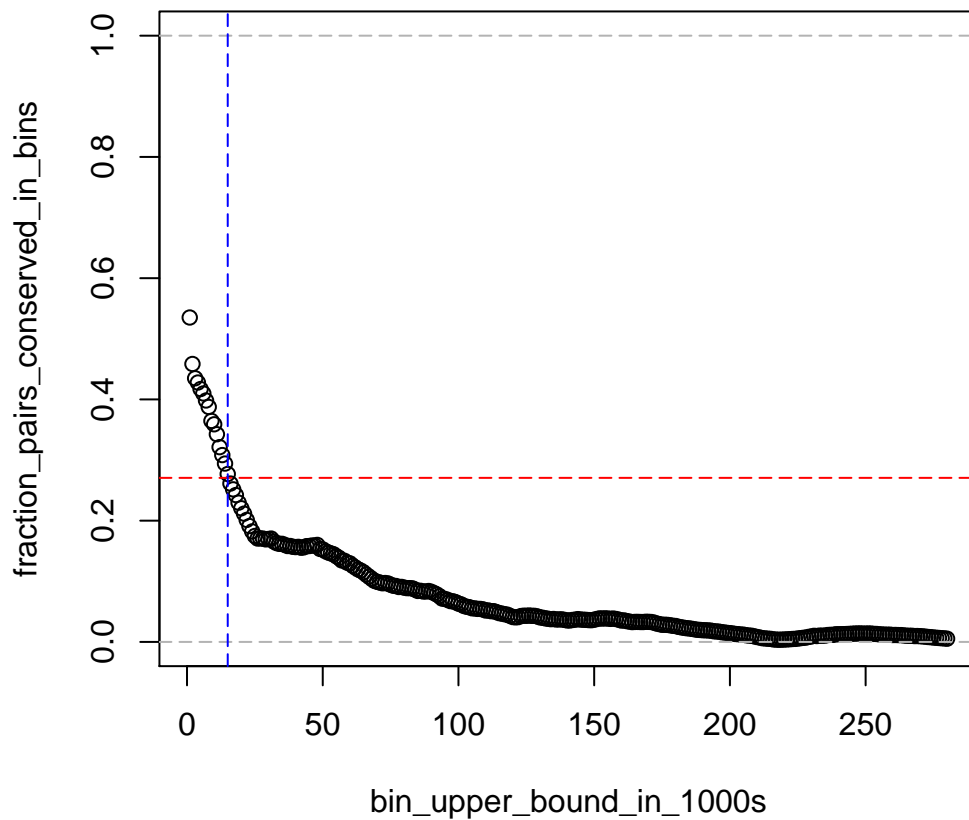

**Bin\_conservation\_minus\_bg\_IL-5-2s1\_vs\_WI0606**  
**PD-0.707389**

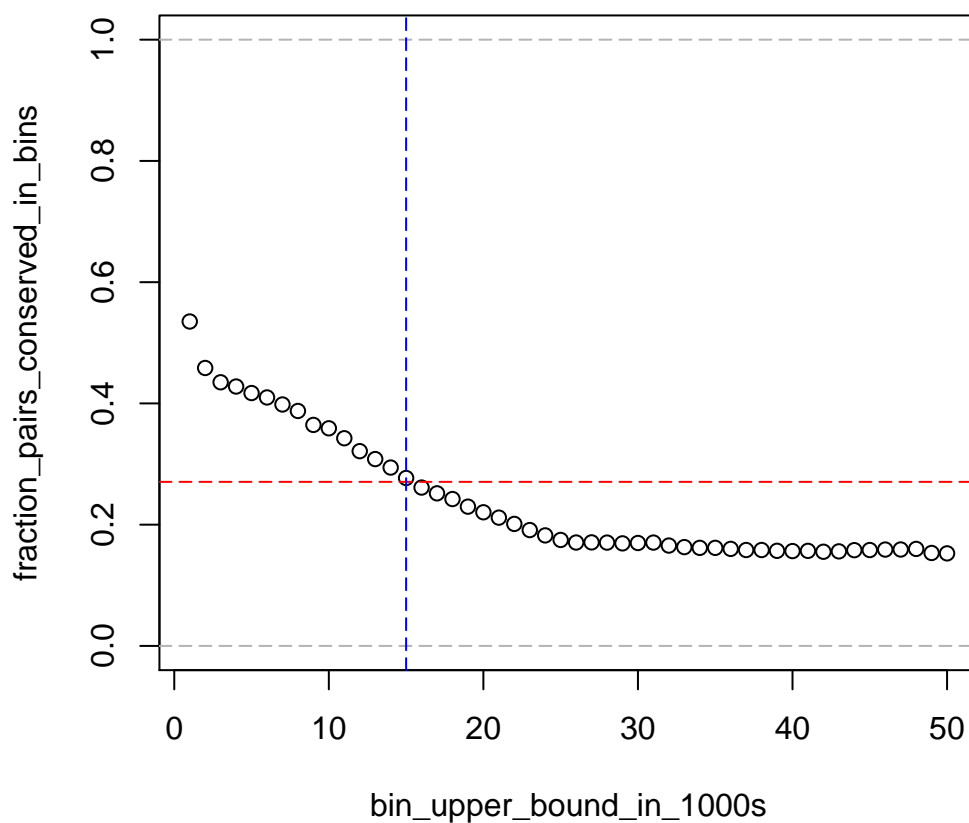

Supplement: s1 [file s1]

**Bin\_conservation\_minus\_bg\_CVG-1\_vs\_CviKI**  
**PD-0.653317**

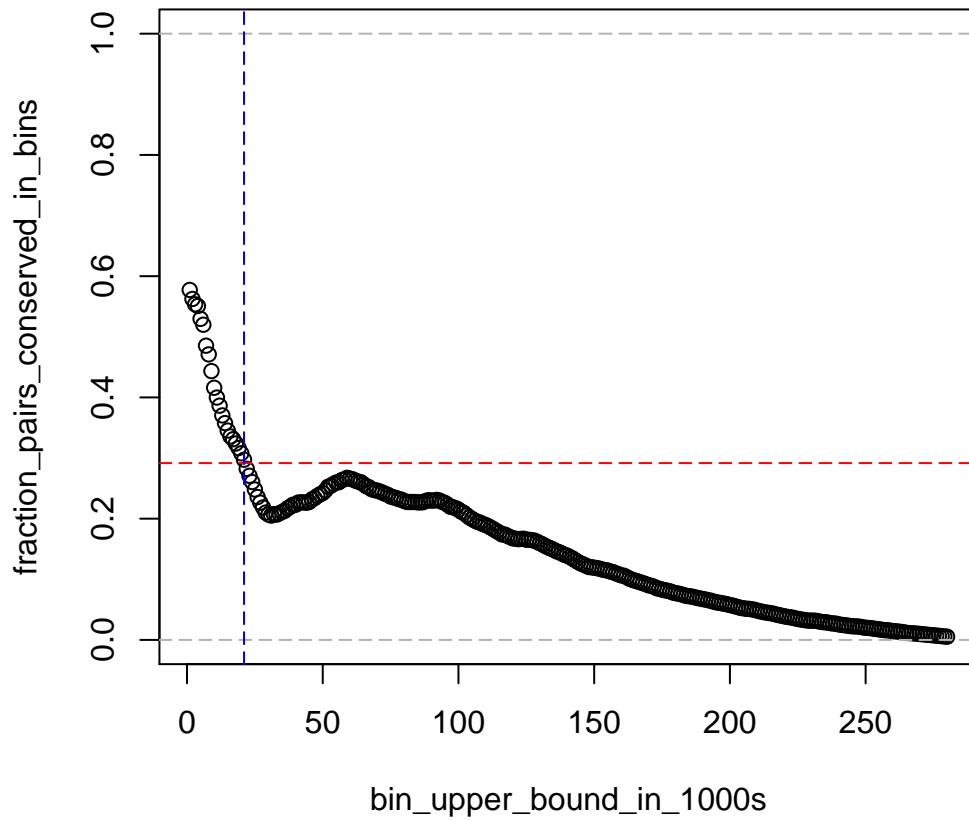

**Bin\_conservation\_minus\_bg\_CVG-1\_vs\_CviKI**  
**PD-0.653317**

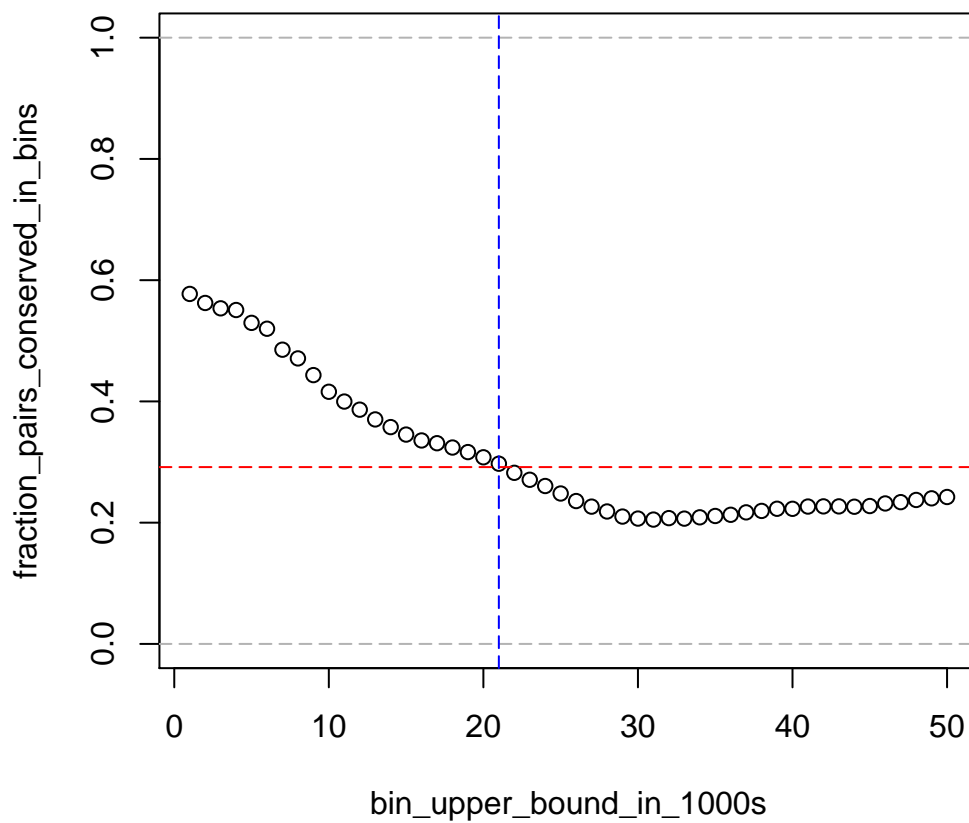

Supplement: s1 [file s1]

**Bin\_conservation\_minus\_bg\_CVB-1\_vs\_NY-2B**  
**PD-0.679148**

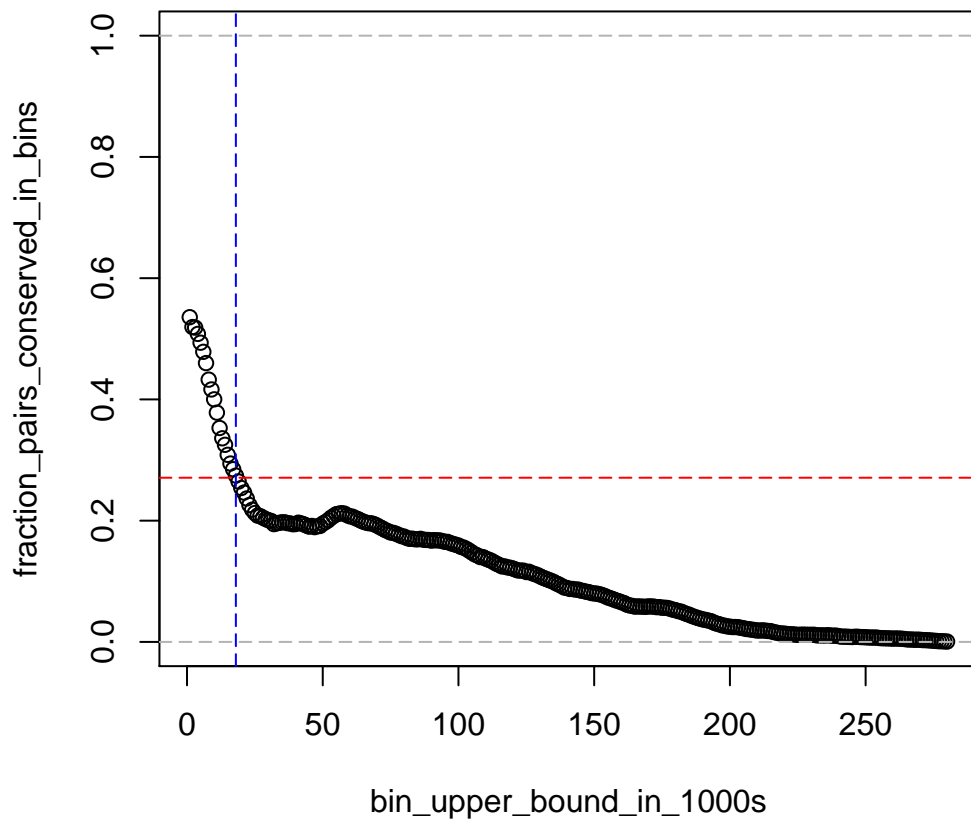

**Bin\_conservation\_minus\_bg\_CVB-1\_vs\_NY-2B**  
**PD-0.679148**

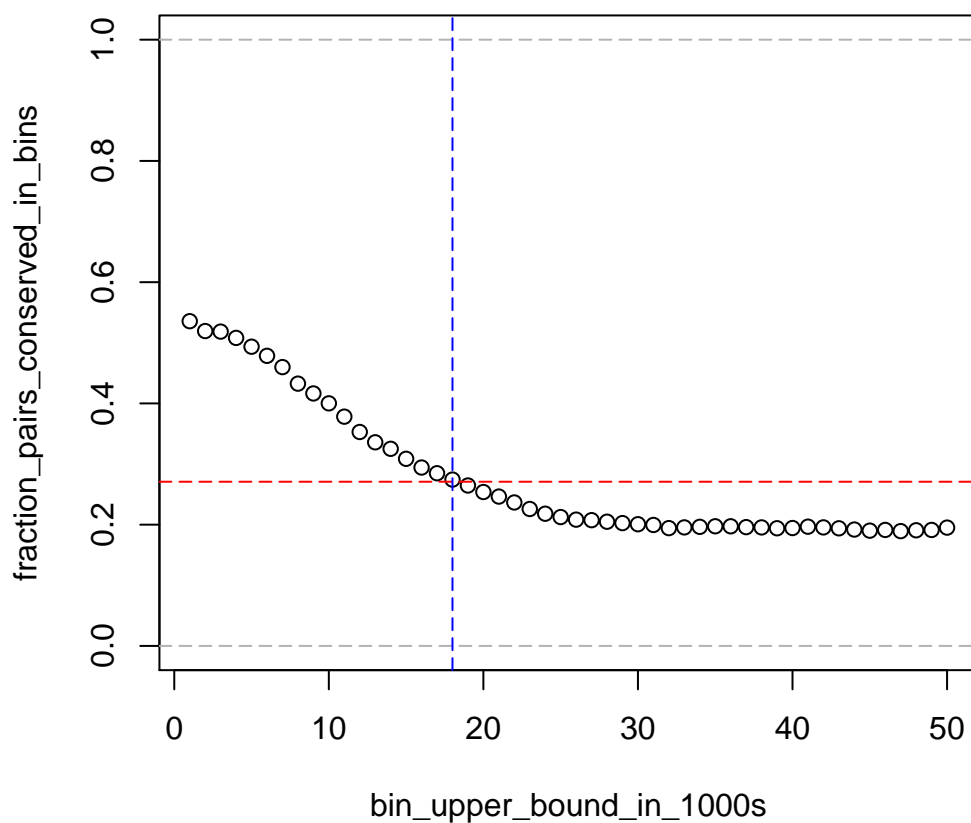

Supplement: s1 [file s1]

**Bin\_conservation\_minus\_bg\_ATCV1\_vs\_Fr5L**  
**PD-0.45857**

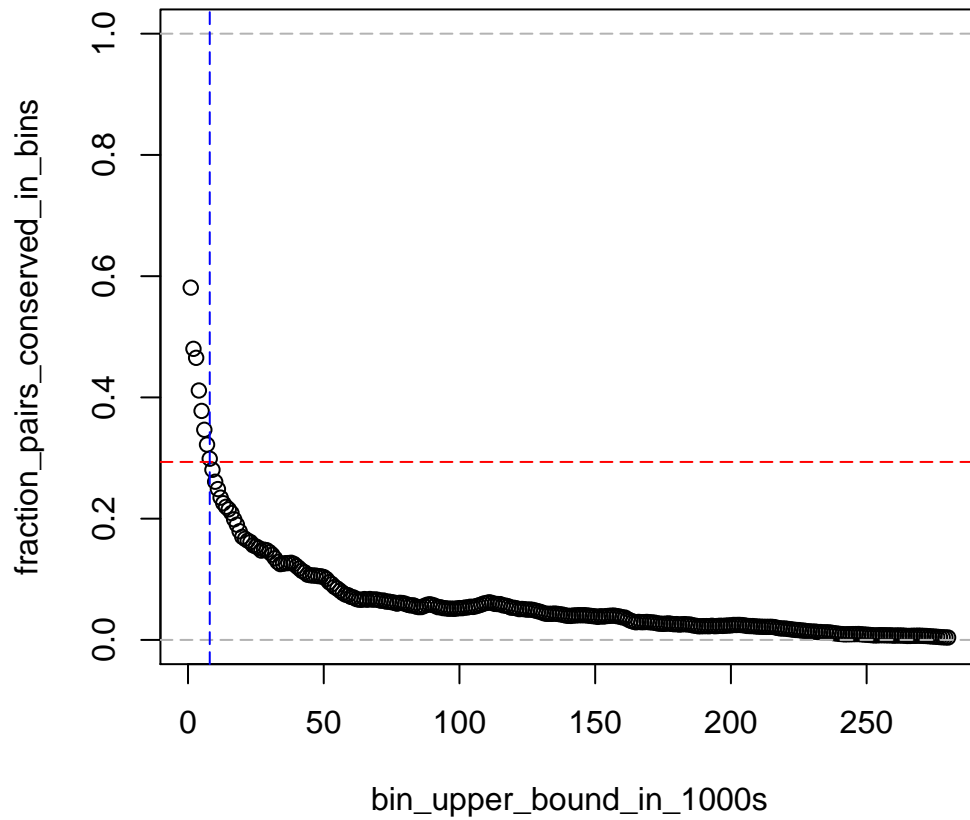

**Bin\_conservation\_minus\_bg\_ATCV1\_vs\_Fr5L**  
**PD-0.45857**

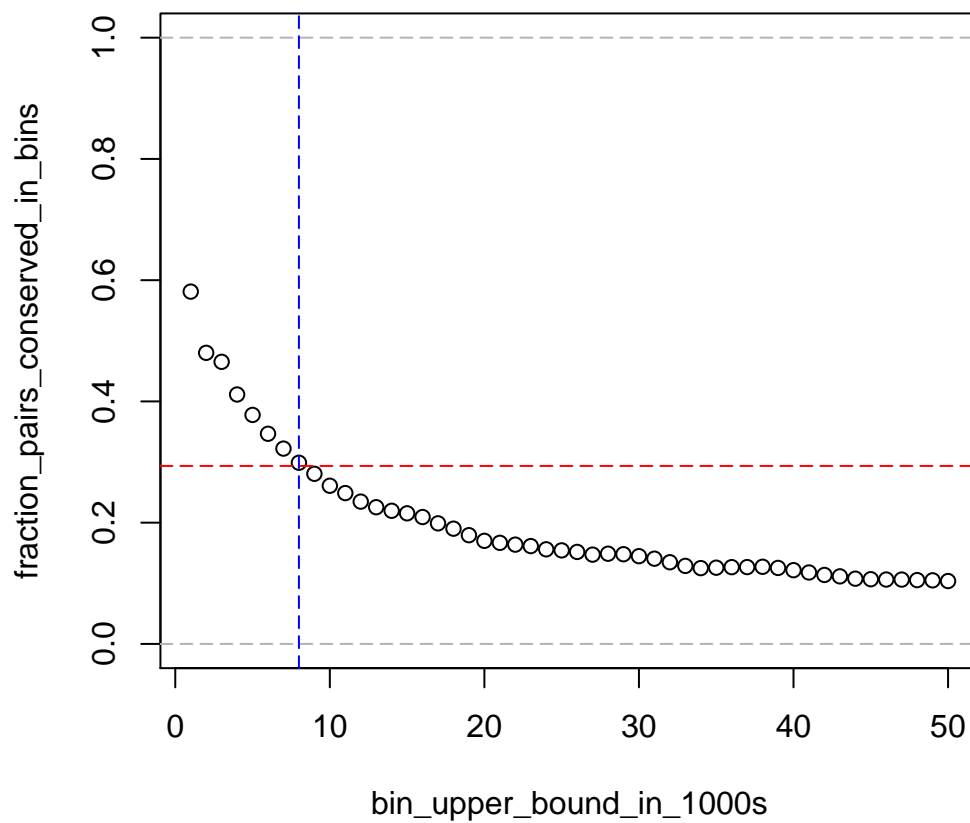

Supplement: s1 [file s1]

**Bin\_conservation\_minus\_bg\_ATCV1\_vs\_Can18-4**  
**PD-0.469121**

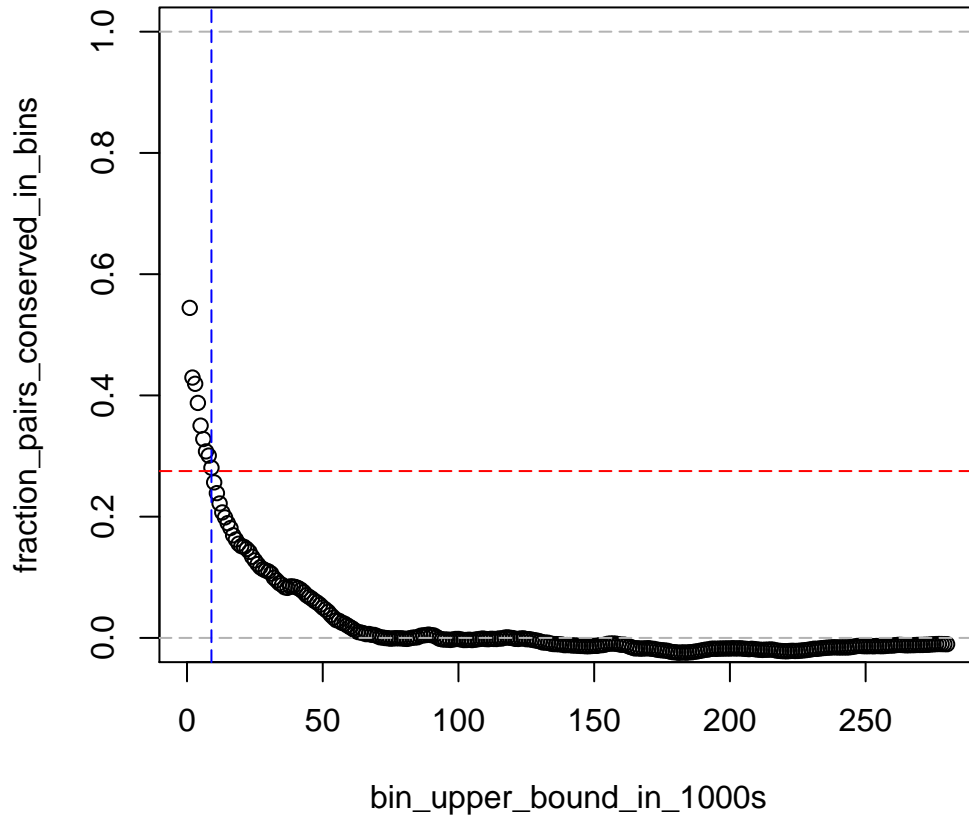

**Bin\_conservation\_minus\_bg\_ATCV1\_vs\_Can18-4**  
**PD-0.469121**

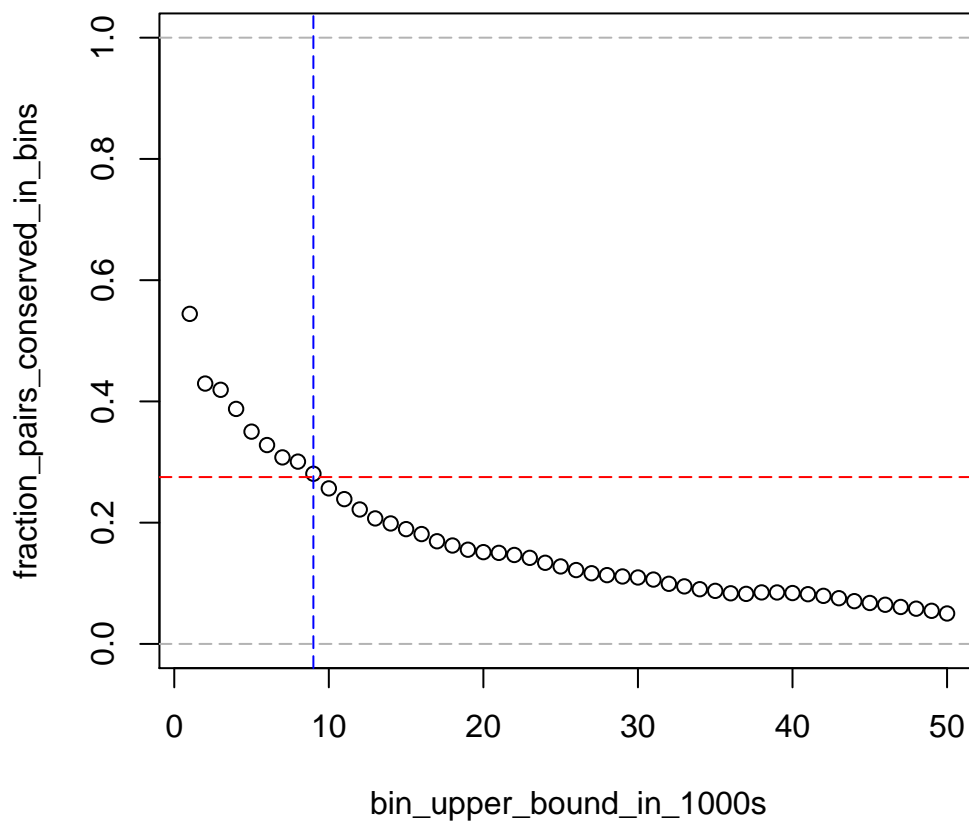

Supplement: s1 [file s1]

**Bin\_conservation\_minus\_bg\_Fr5L\_vs\_NY2A**  
**PD-0.667033**

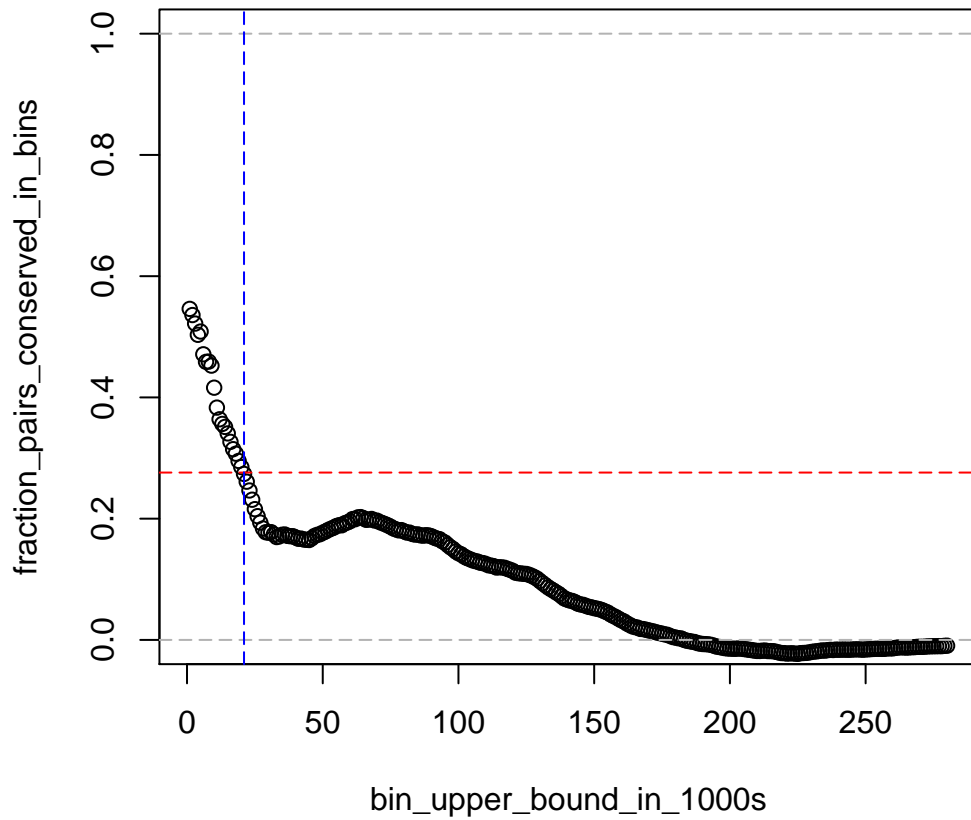

**Bin\_conservation\_minus\_bg\_Fr5L\_vs\_NY2A**  
**PD-0.667033**

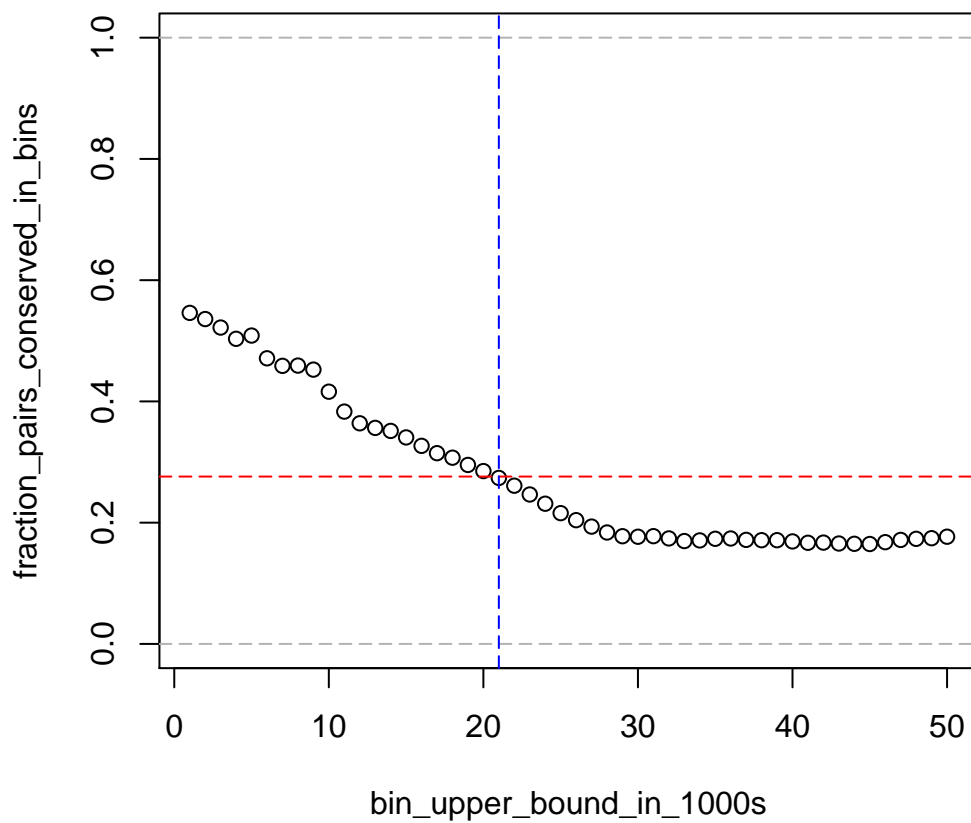

Supplement: s1 [file s1]

**Bin\_conservation\_minus\_bg\_MA-1E\_vs\_NY-2B**  
**PD-0.150717**

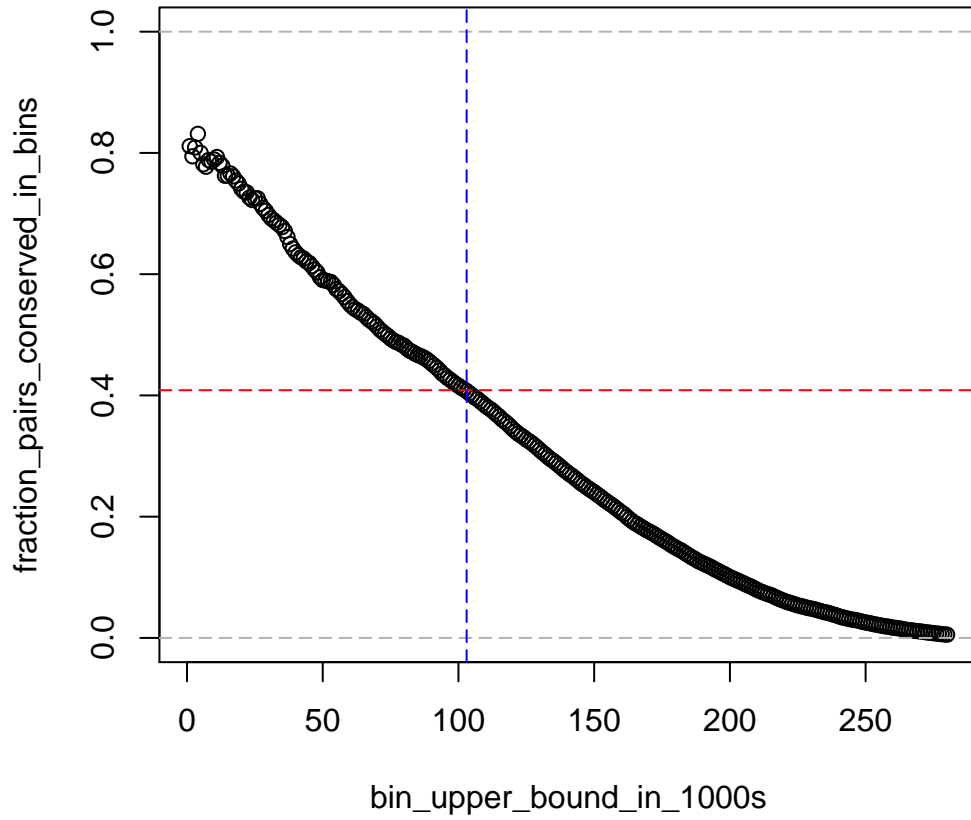

**Bin\_conservation\_minus\_bg\_MA-1E\_vs\_NY-2B**  
**PD-0.150717**

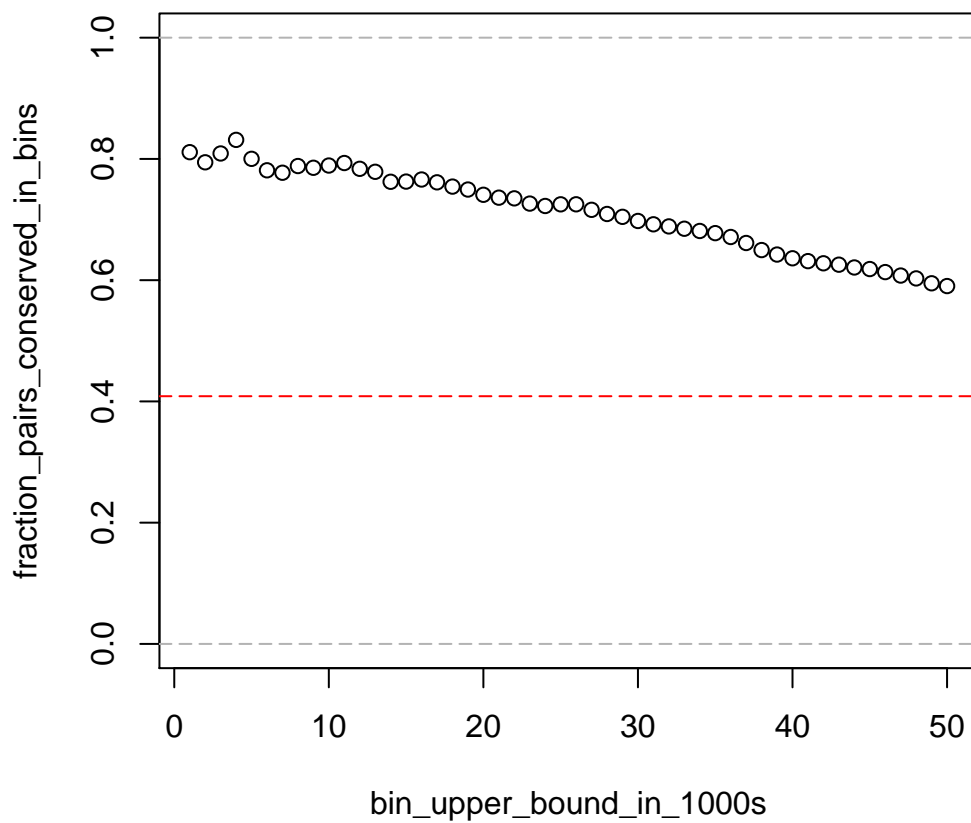

Supplement: s1 [file s1]

**Bin\_conservation\_minus\_bg\_CVM-1\_vs\_NE-JV-2**  
**PD-0.459323**

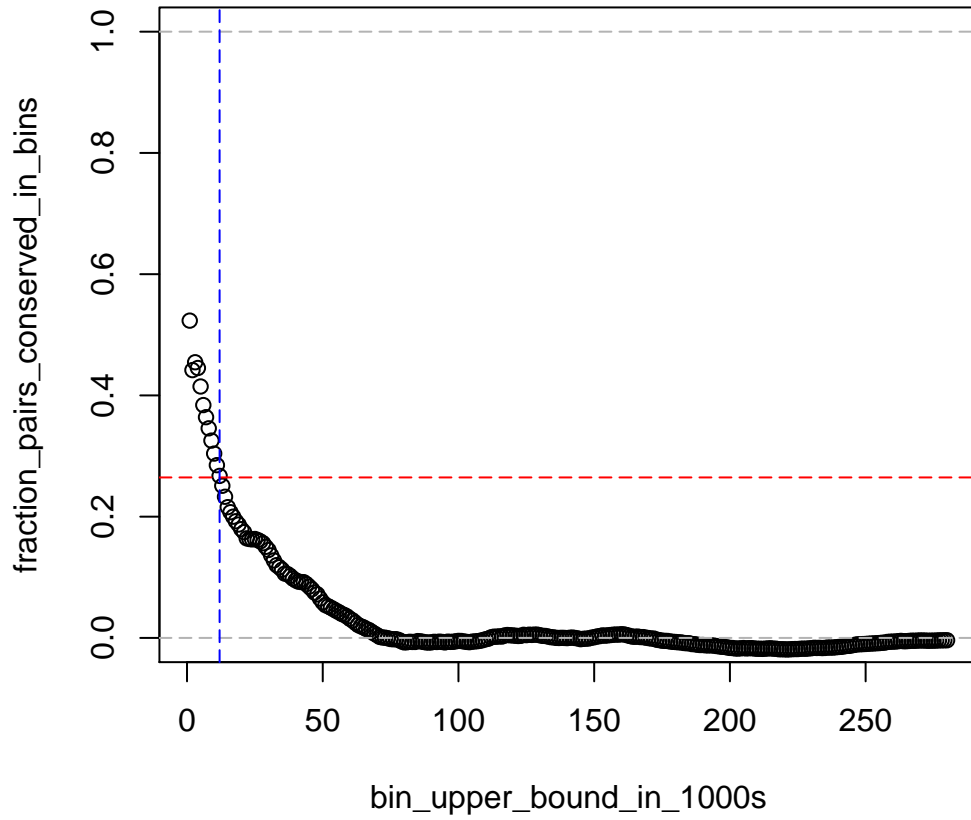

**Bin\_conservation\_minus\_bg\_CVM-1\_vs\_NE-JV-2**  
**PD-0.459323**

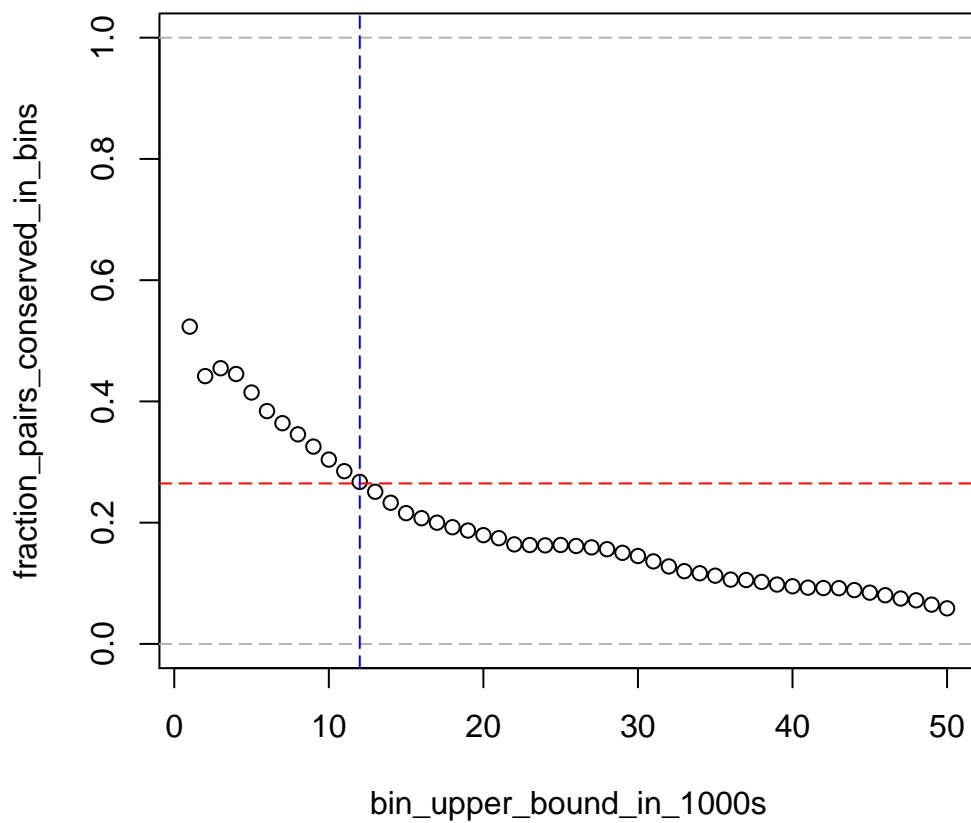

Supplement: s1 [file s1]

**Bin\_conservation\_minus\_bg\_ATCV1\_vs\_MT325**  
**PD-0.458378**

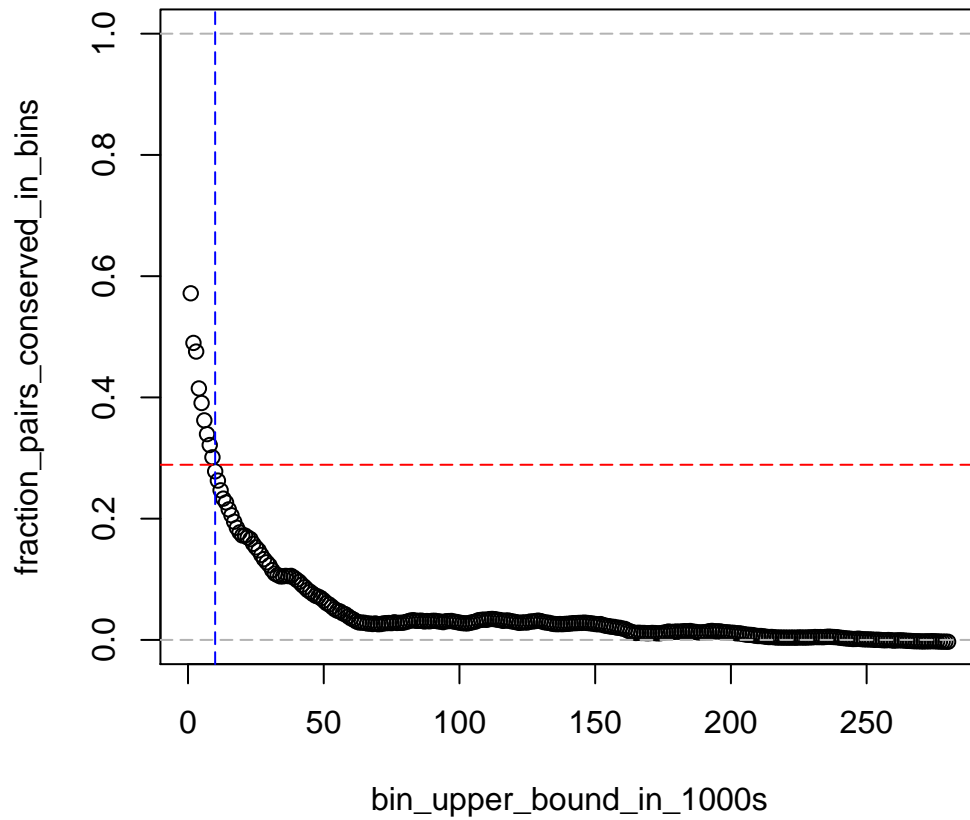

**Bin\_conservation\_minus\_bg\_ATCV1\_vs\_MT325**  
**PD-0.458378**

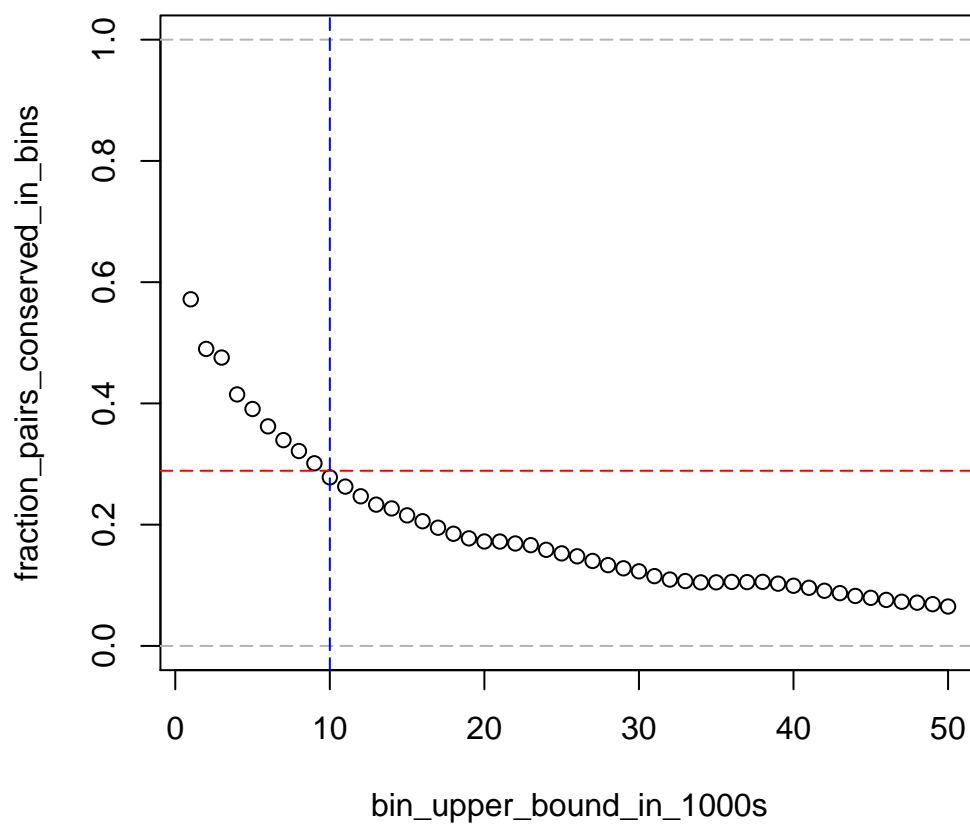

Supplement: s1 [file s1]

**Bin\_conservation\_minus\_bg\_NE-JV-2\_vs\_NYs-1**  
**PD-0.702594**

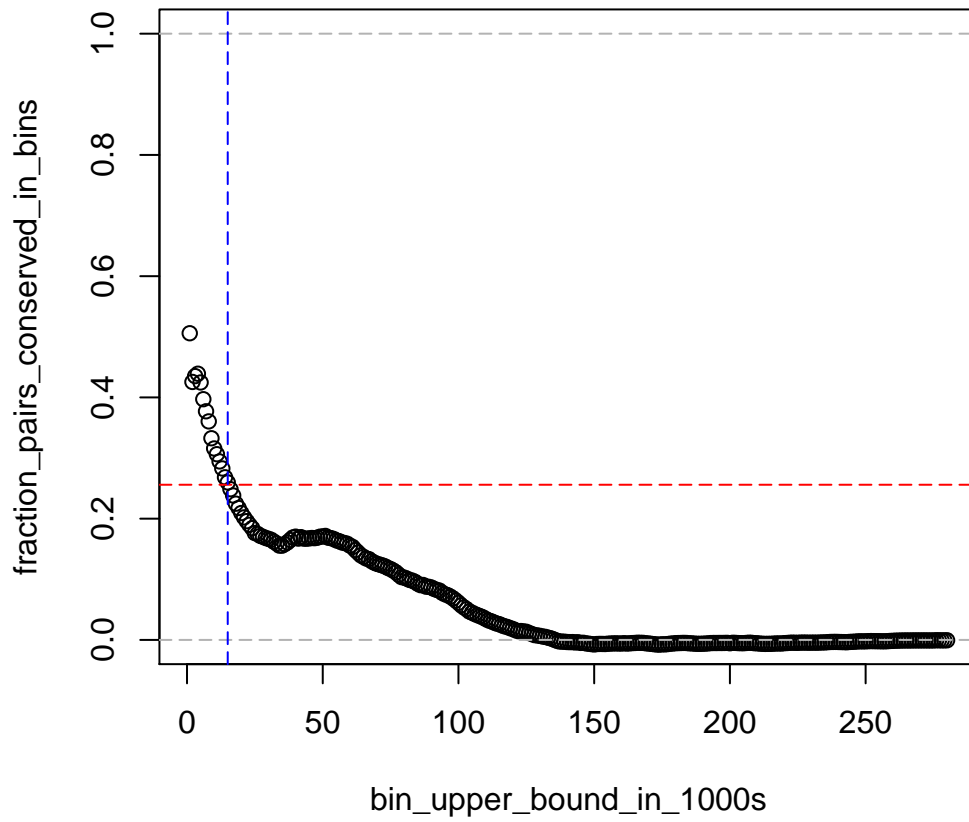

**Bin\_conservation\_minus\_bg\_NE-JV-2\_vs\_NYs-1**  
**PD-0.702594**

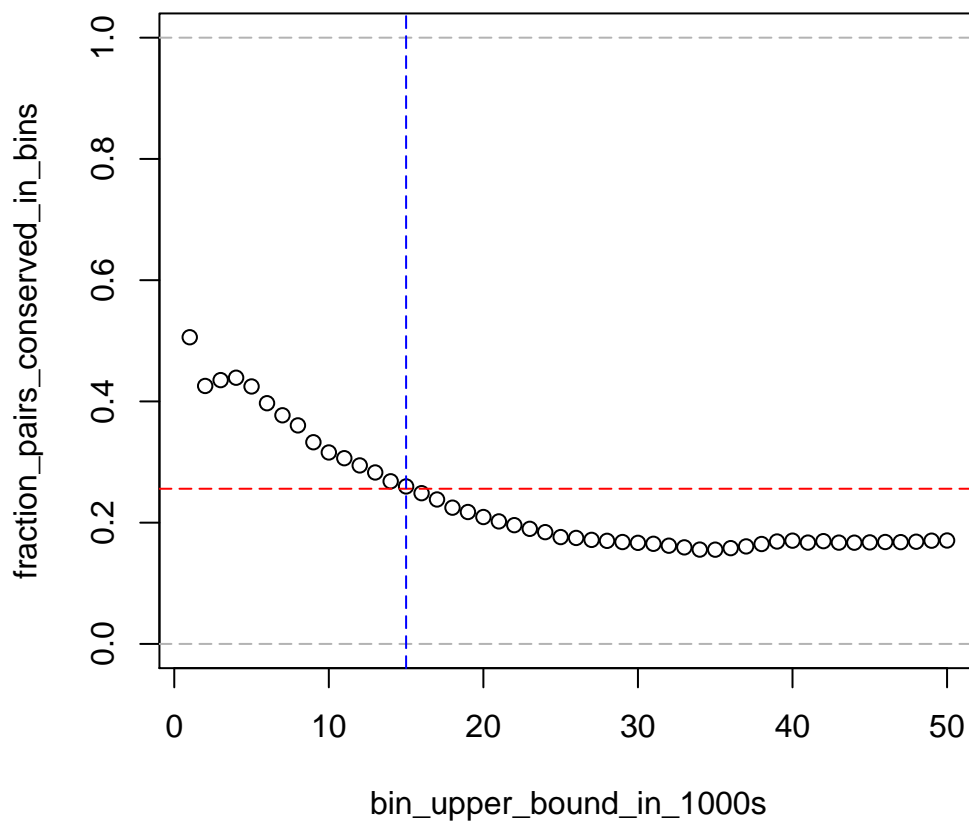

Supplement: s1 [file s1]
