# Supplementary figures and images for: Gene Gangs of the Chloroviruses: Conserved Clusters of Collinear Monocistronic Genes (part 6 of 9)
Source: MDPI journal article supplement (doi:10.3390/v10100576), 2018-10-20

**Bin\_conservation\_minus\_bg\_AP110A\_vs\_Can18-4**  
**PD-0.036245**

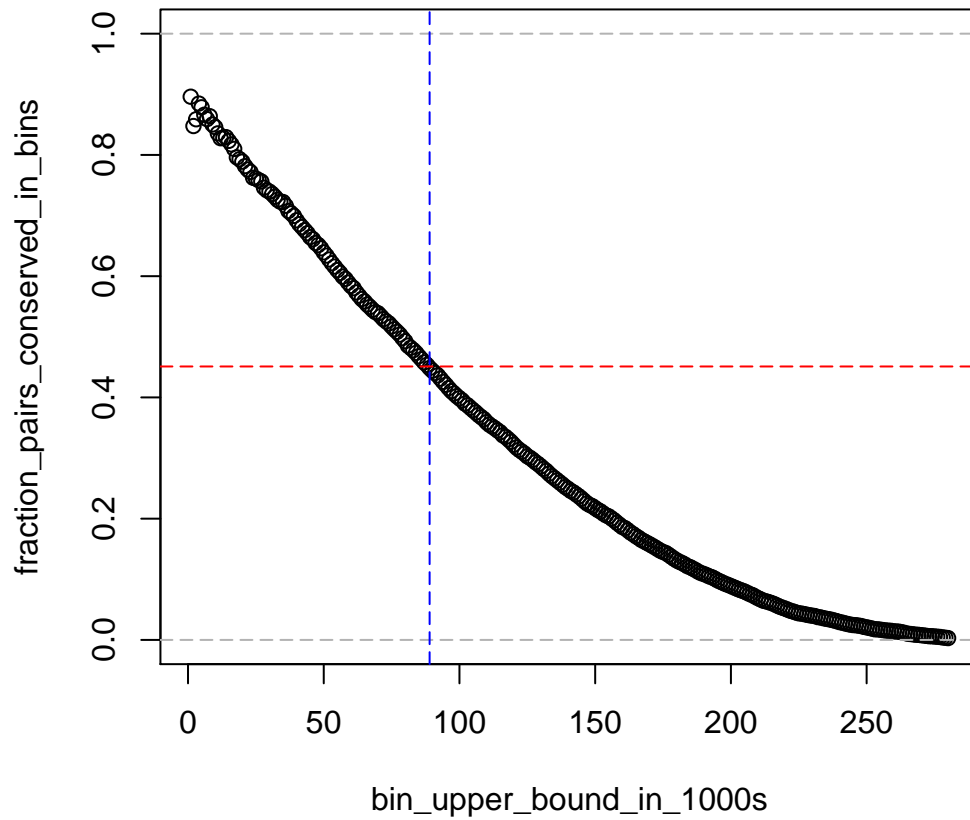

**Bin\_conservation\_minus\_bg\_AP110A\_vs\_Can18-4**  
**PD-0.036245**

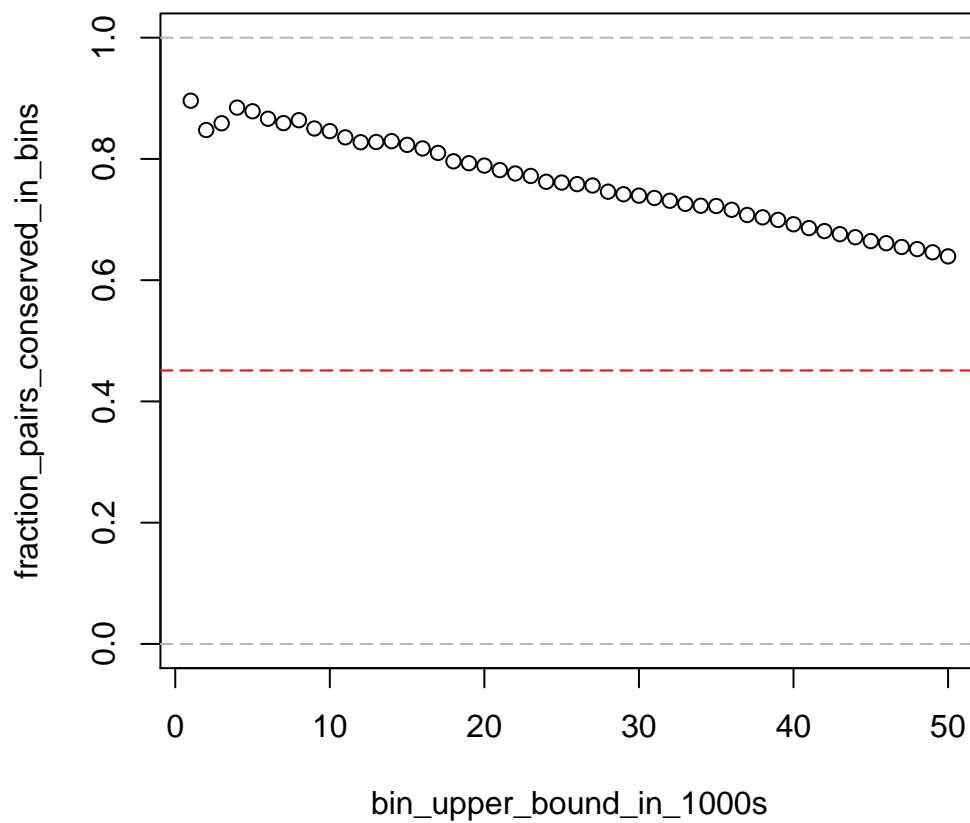

Supplement: s1 [file s1]

**Bin\_conservation\_minus\_bg\_AR158\_vs\_NY-2B**  
**PD-0.007194**

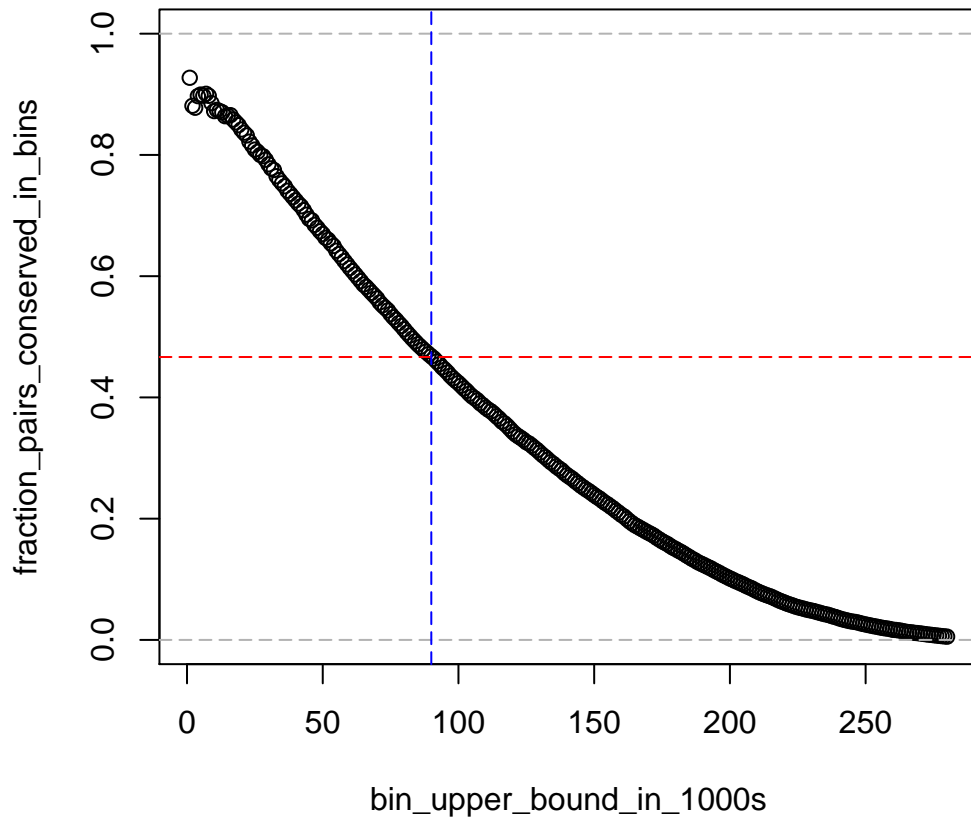

**Bin\_conservation\_minus\_bg\_AR158\_vs\_NY-2B**  
**PD-0.007194**

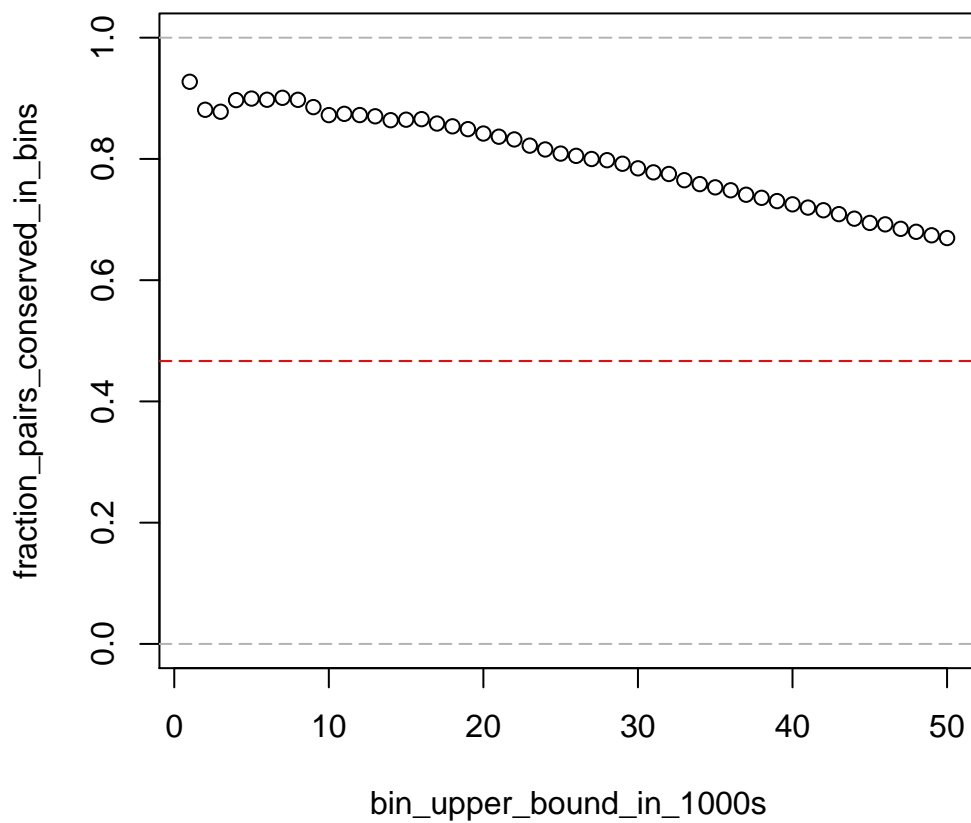

Supplement: s1 [file s1]

**Bin\_conservation\_minus\_bg\_Canal-1\_vs\_CVM-1**  
**PD-0.459988**

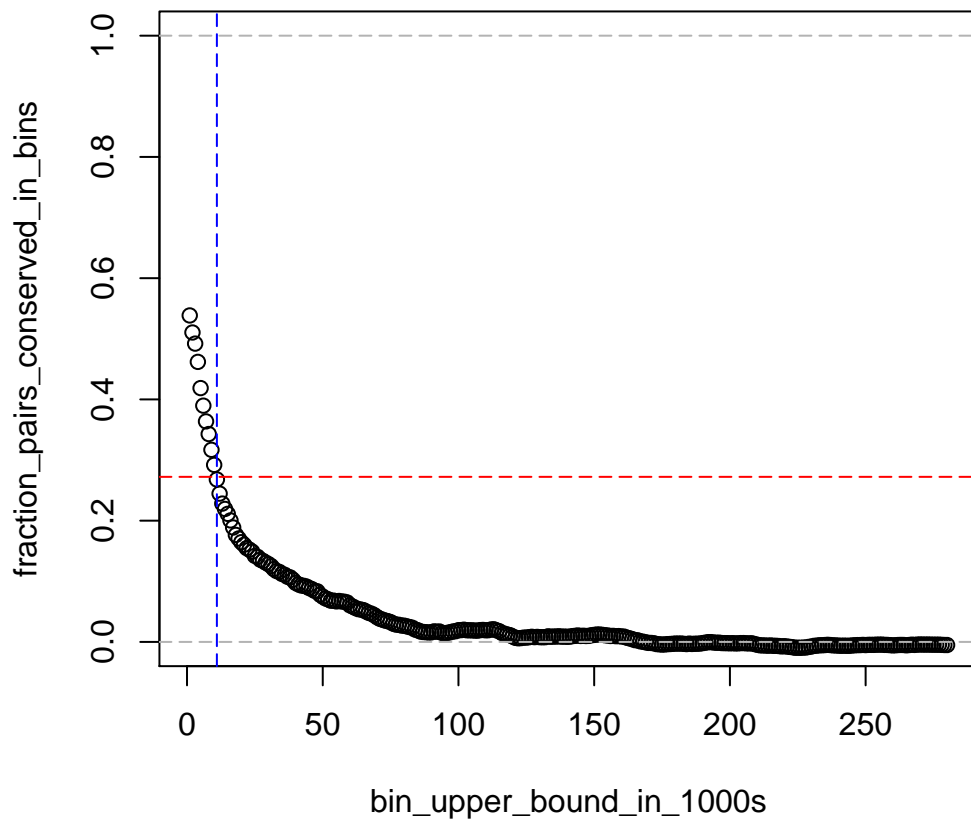

**Bin\_conservation\_minus\_bg\_Canal-1\_vs\_CVM-1**  
**PD-0.459988**

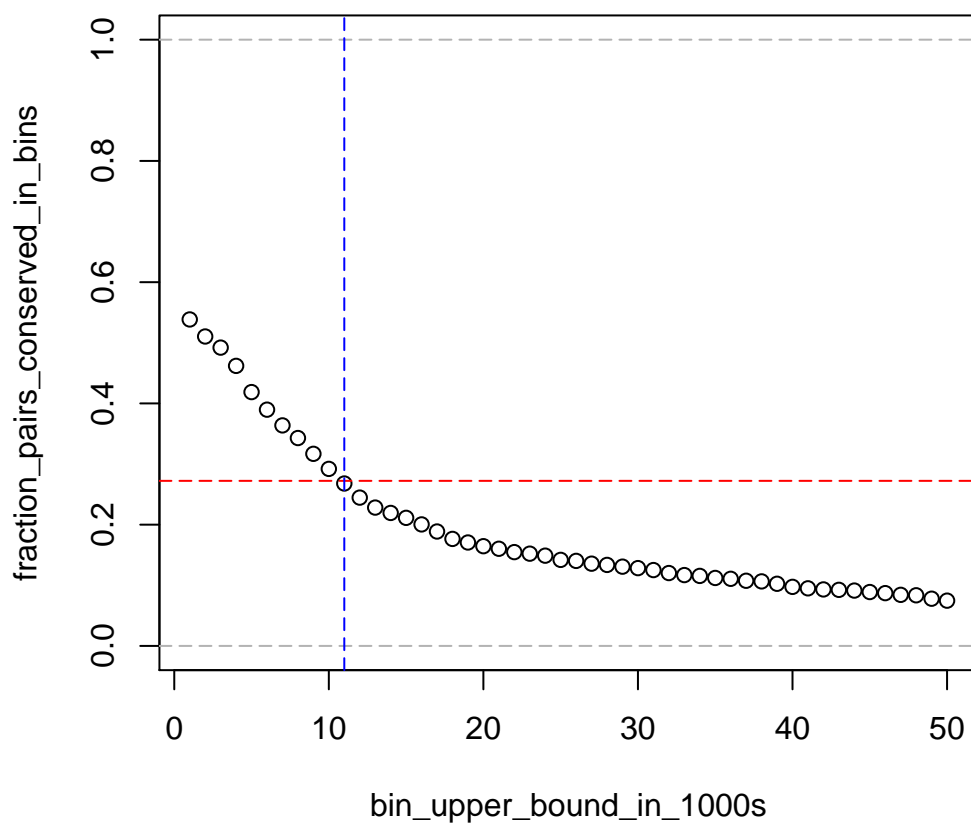

Supplement: s1 [file s1]

**Bin\_conservation\_minus\_bg\_AN69C\_vs\_PBCV1**  
**PD-0.014654**

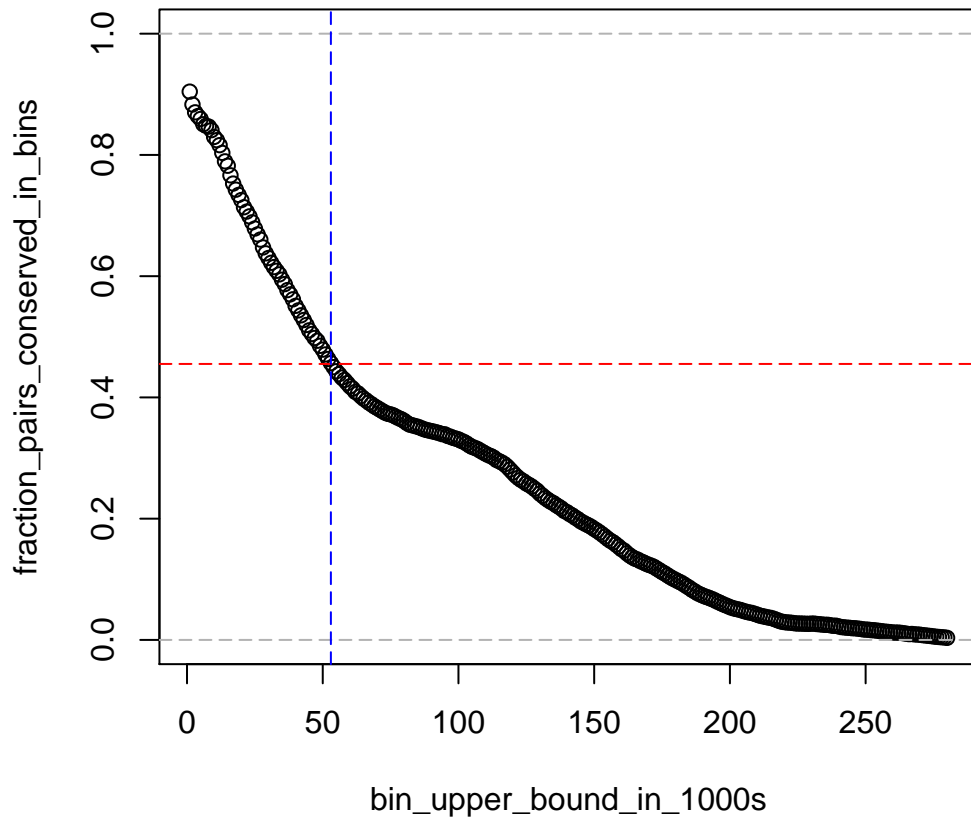

**Bin\_conservation\_minus\_bg\_AN69C\_vs\_PBCV1**  
**PD-0.014654**

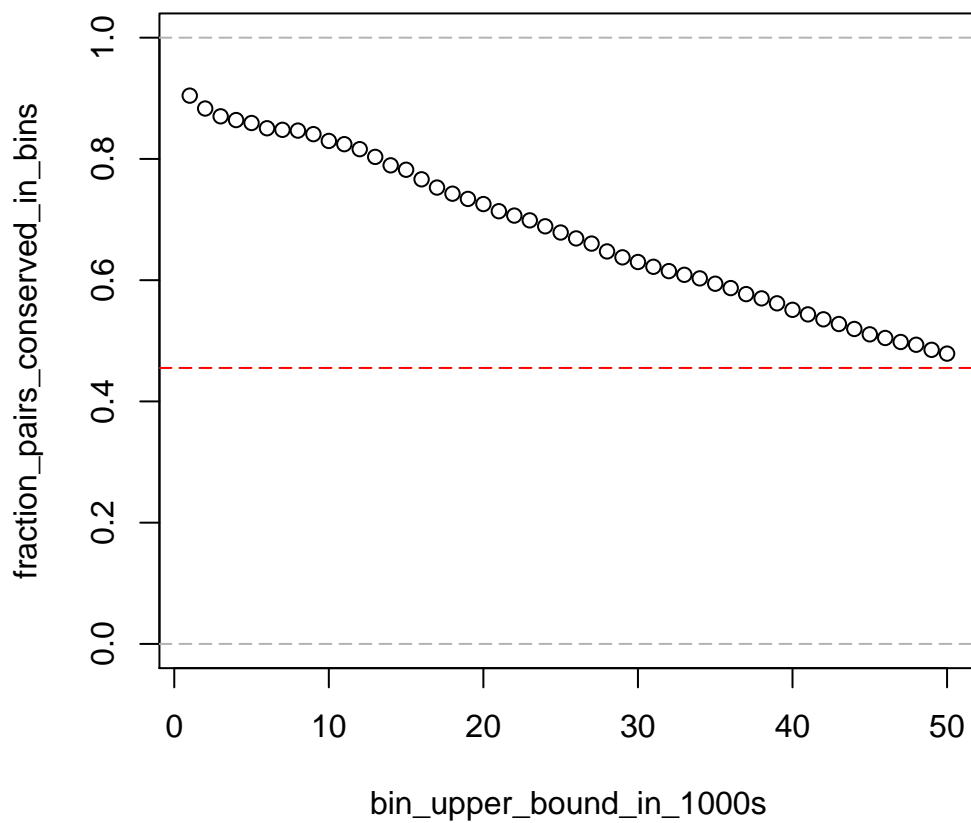

Supplement: s1 [file s1]

**Bin\_conservation\_minus\_bg\_CviKI\_vs\_MA-1D**  
**PD-0.145092**

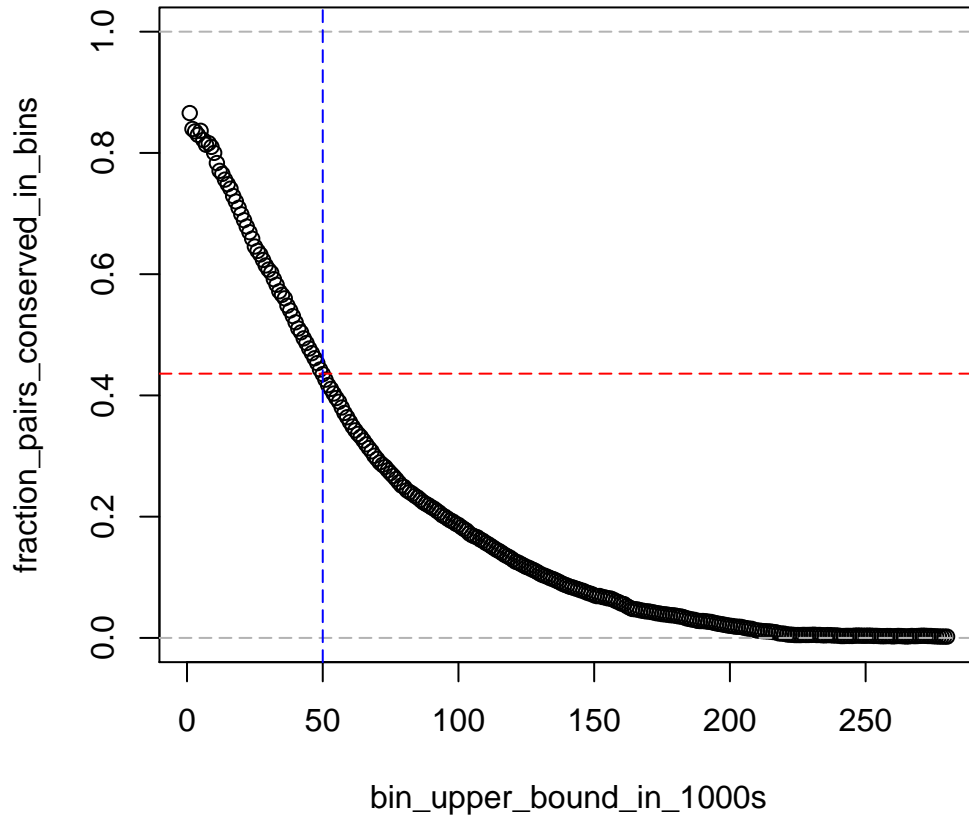

**Bin\_conservation\_minus\_bg\_CviKI\_vs\_MA-1D**  
**PD-0.145092**

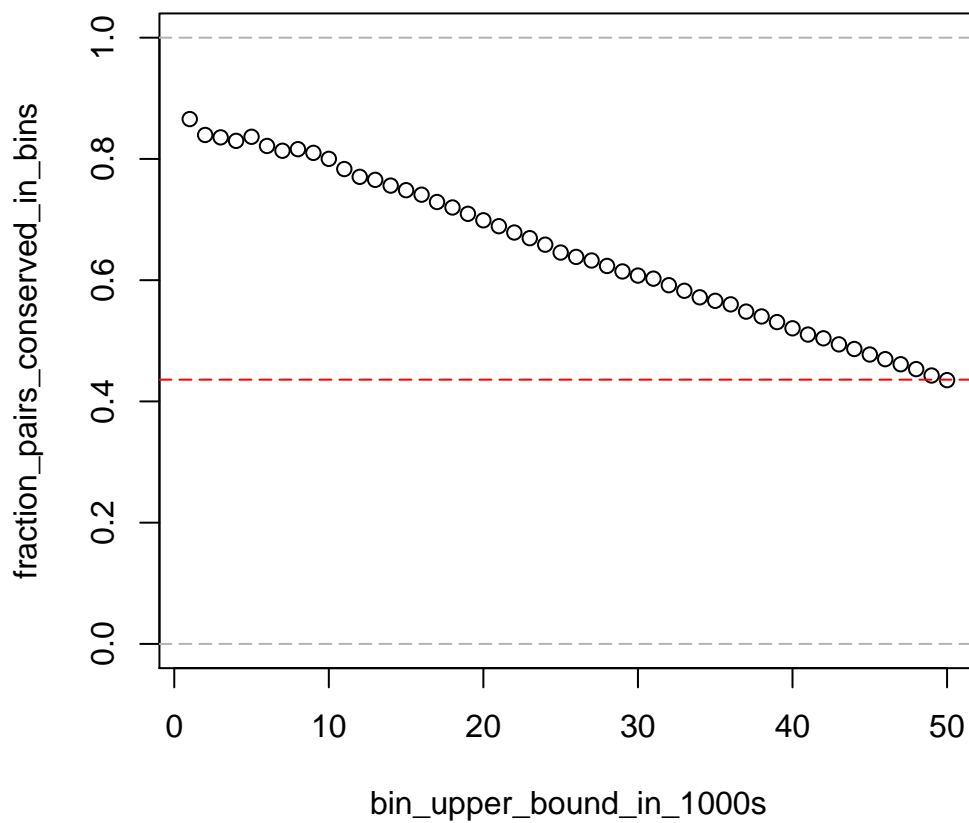

Supplement: s1 [file s1]

**Bin\_conservation\_minus\_bg\_Canal-1\_vs\_CviKI**  
**PD-0.694177**

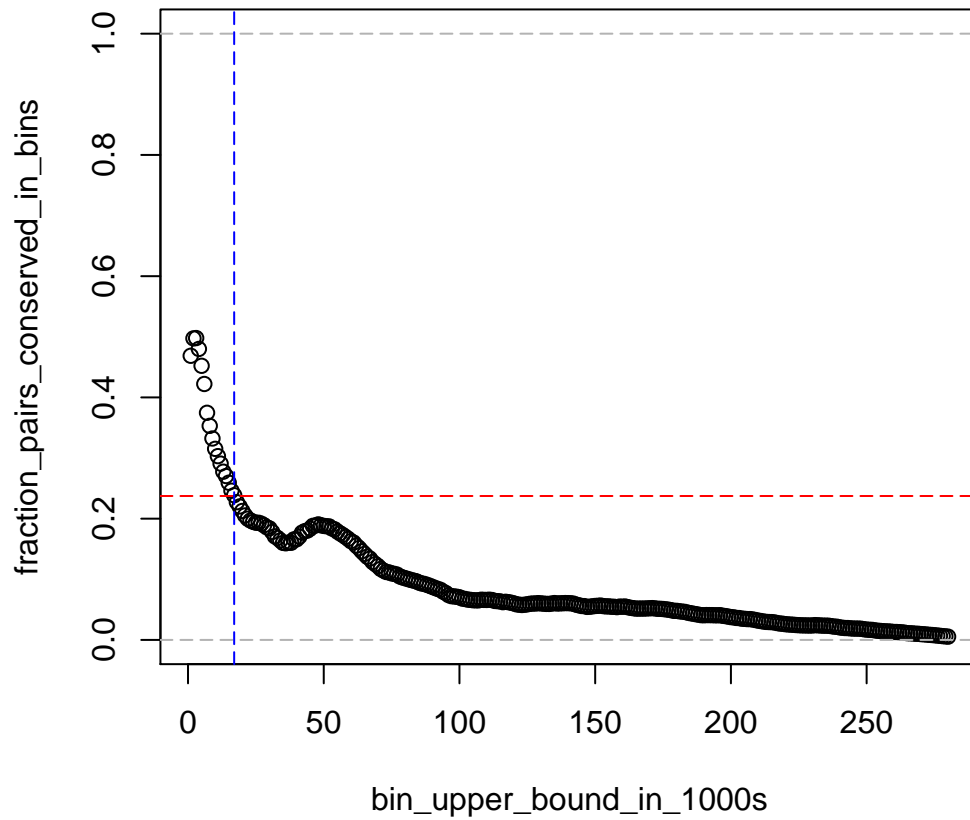

**Bin\_conservation\_minus\_bg\_Canal-1\_vs\_CviKI**  
**PD-0.694177**

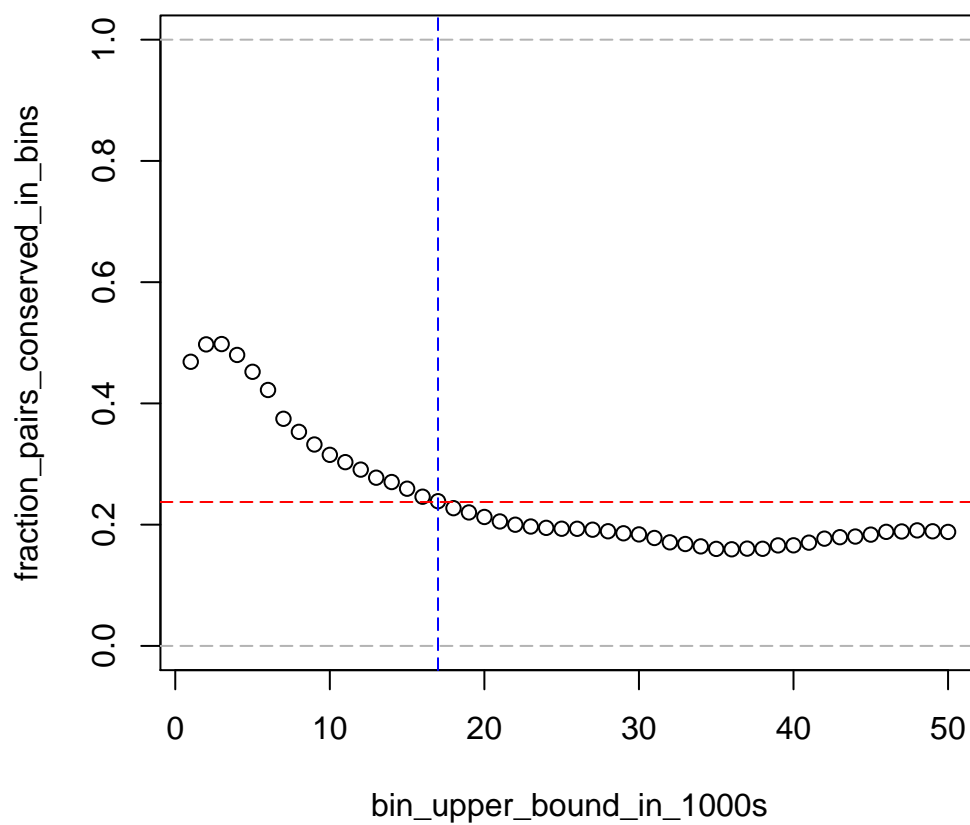

Supplement: s1 [file s1]

**Bin\_conservation\_minus\_bg\_AP110A\_vs\_GM0701.1**  
**PD-0.452271**

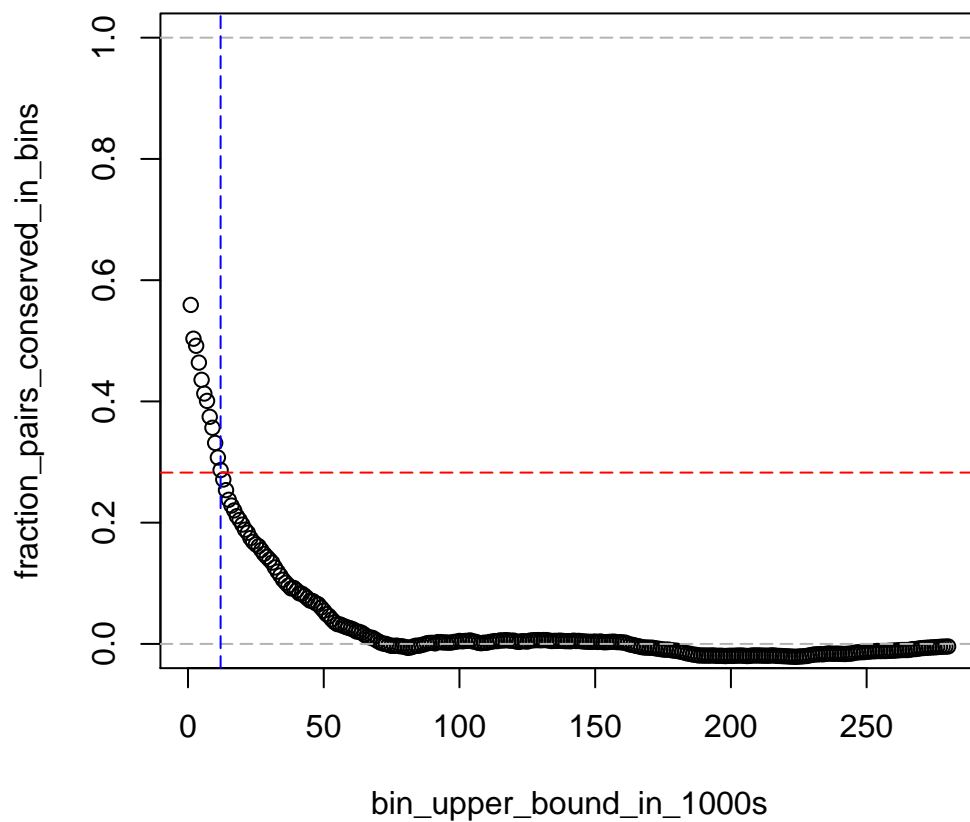

**Bin\_conservation\_minus\_bg\_AP110A\_vs\_GM0701.1**  
**PD-0.452271**

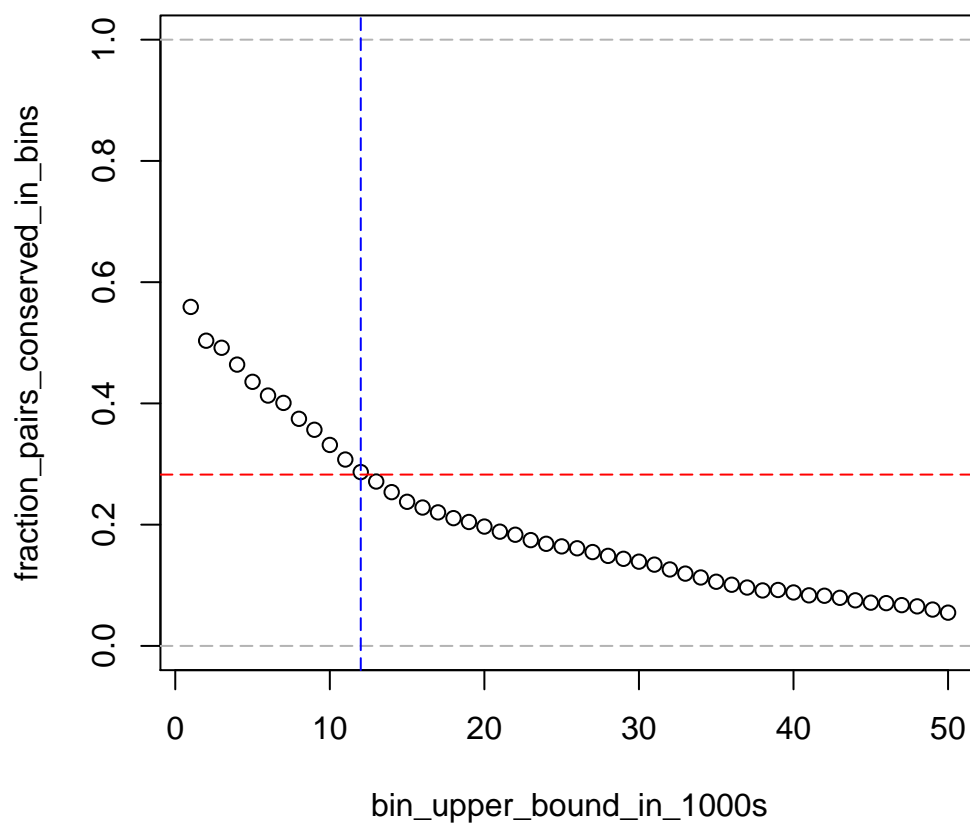

Supplement: s1 [file s1]

**Bin\_conservation\_minus\_bg\_Canal-1\_vs\_OR0704.2.2**  
**PD-0.459994**

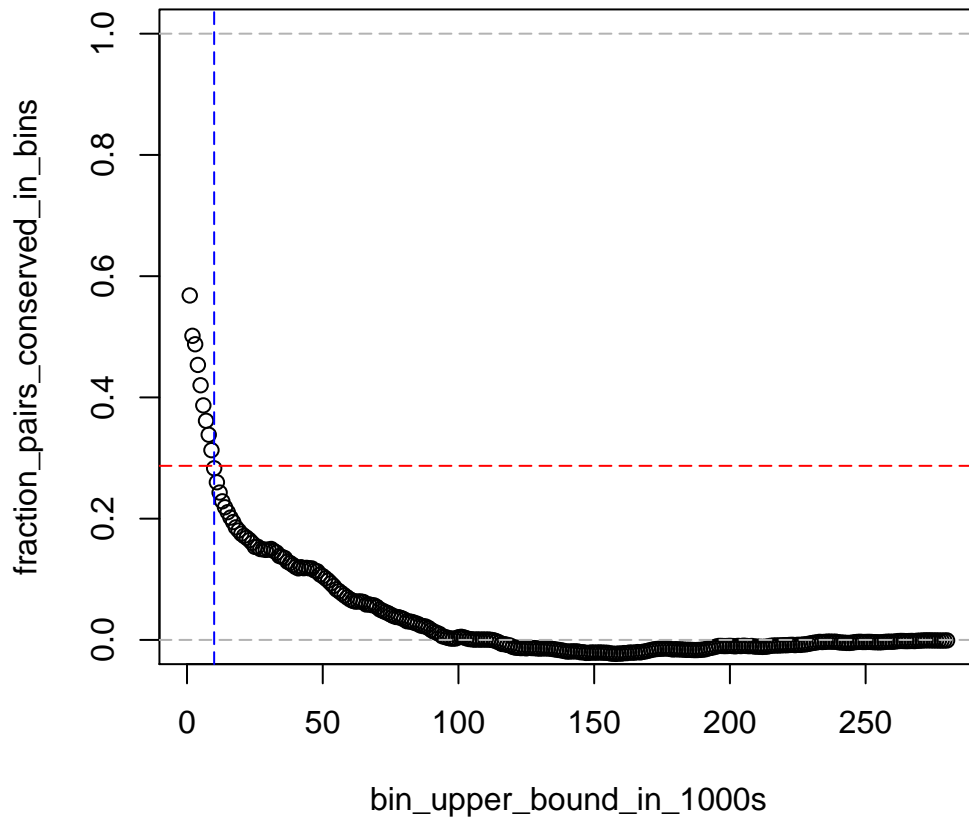

**Bin\_conservation\_minus\_bg\_Canal-1\_vs\_OR0704.2.2**  
**PD-0.459994**

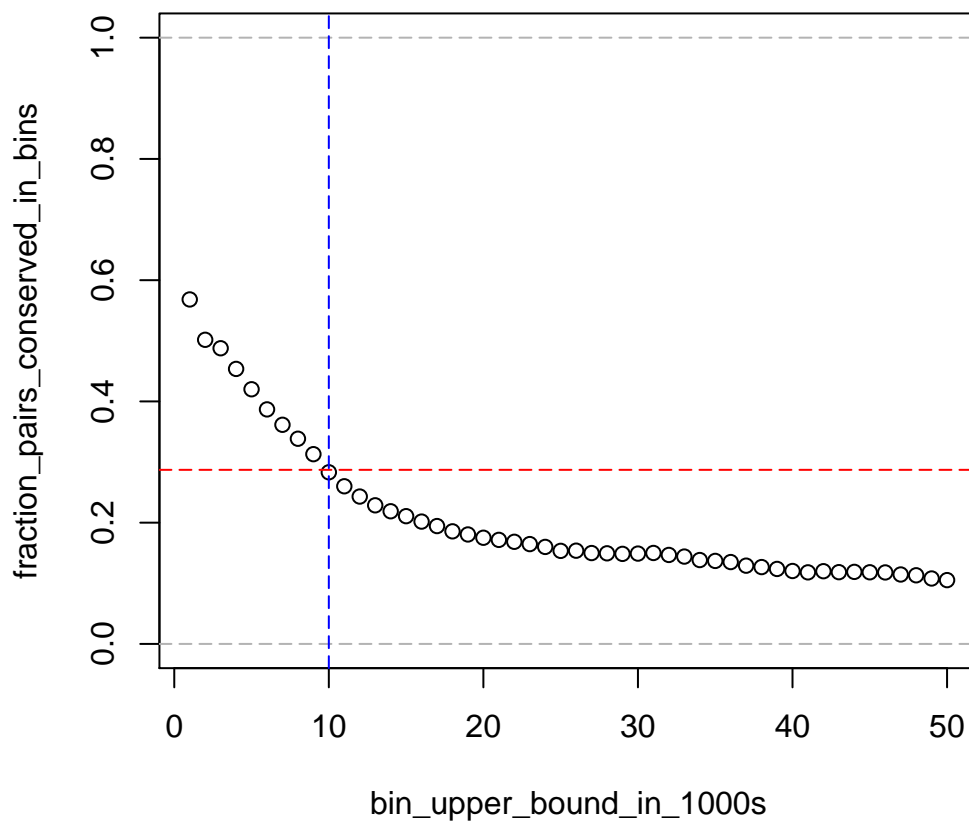

Supplement: s1 [file s1]

**Bin\_conservation\_minus\_bg\_Can18-4\_vs\_NYs-1**  
**PD-0.670328**

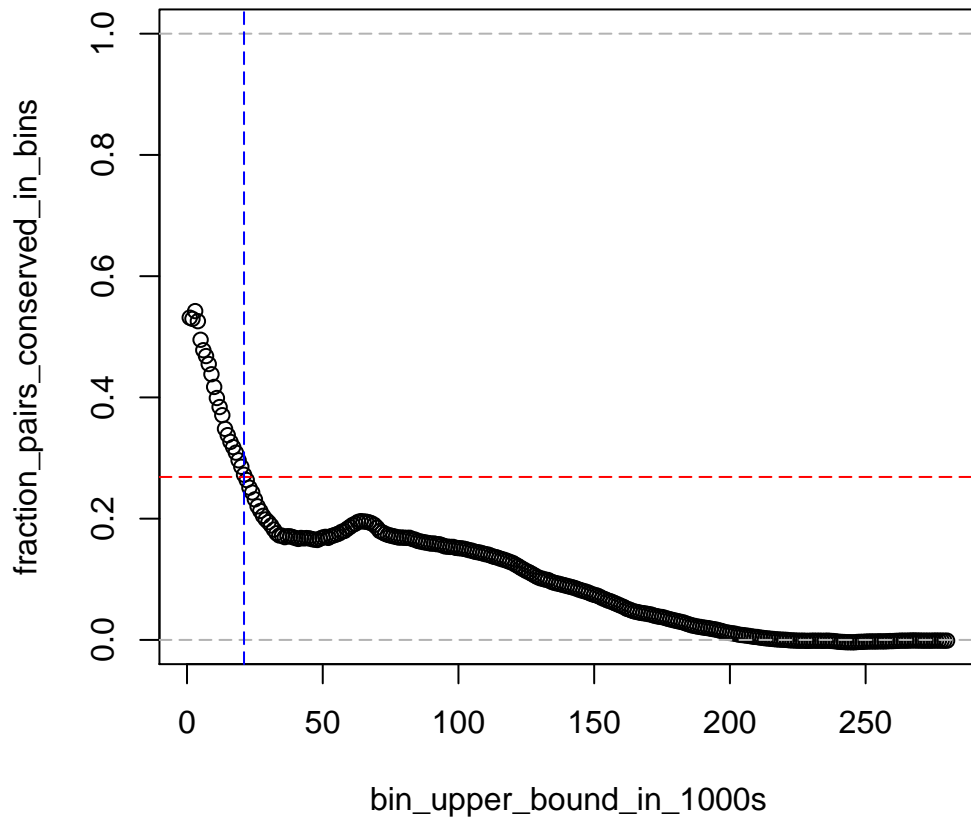

**Bin\_conservation\_minus\_bg\_Can18-4\_vs\_NYs-1**  
**PD-0.670328**

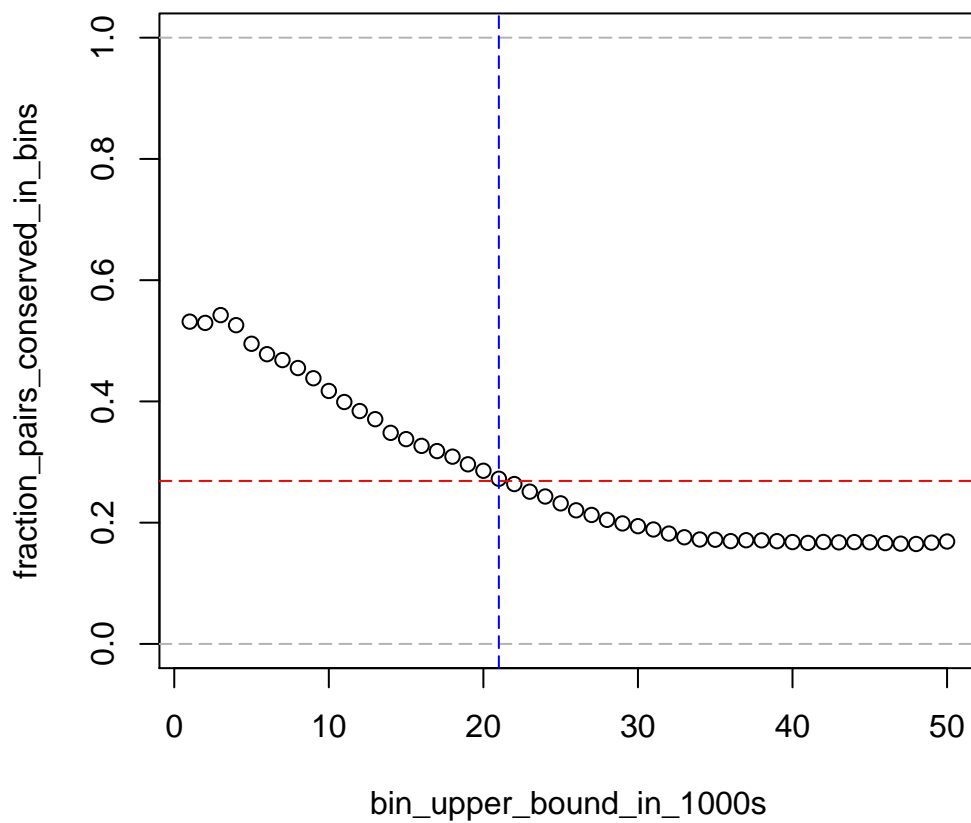

Supplement: s1 [file s1]

**Bin\_conservation\_minus\_bg\_IL-3A\_vs\_NY-2B**  
**PD-0.137225**

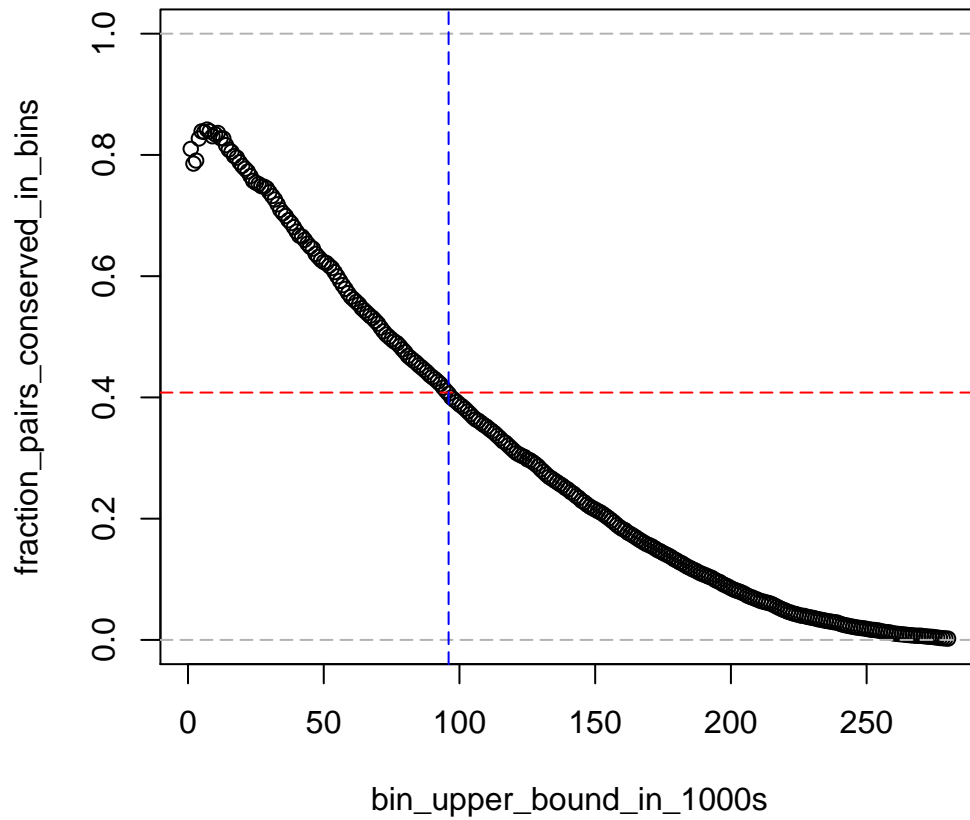

**Bin\_conservation\_minus\_bg\_IL-3A\_vs\_NY-2B**  
**PD-0.137225**

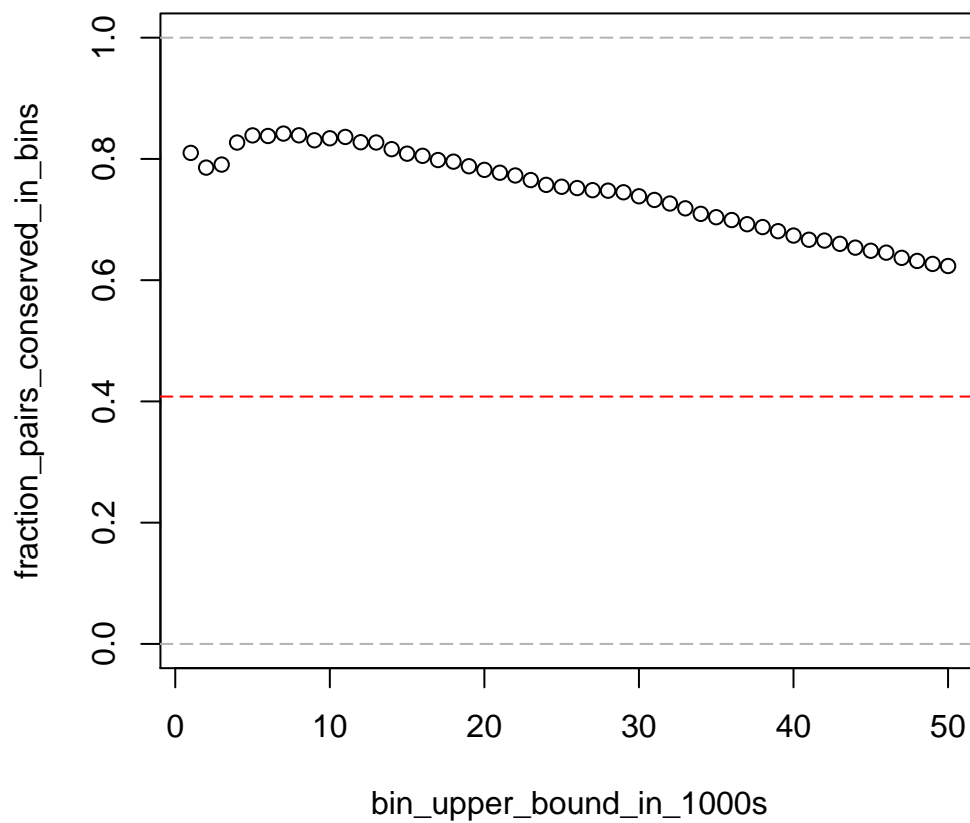

Supplement: s1 [file s1]

**Bin\_conservation\_minus\_bg\_CVA-1\_vs\_PBCV1**  
**PD-0.632272**

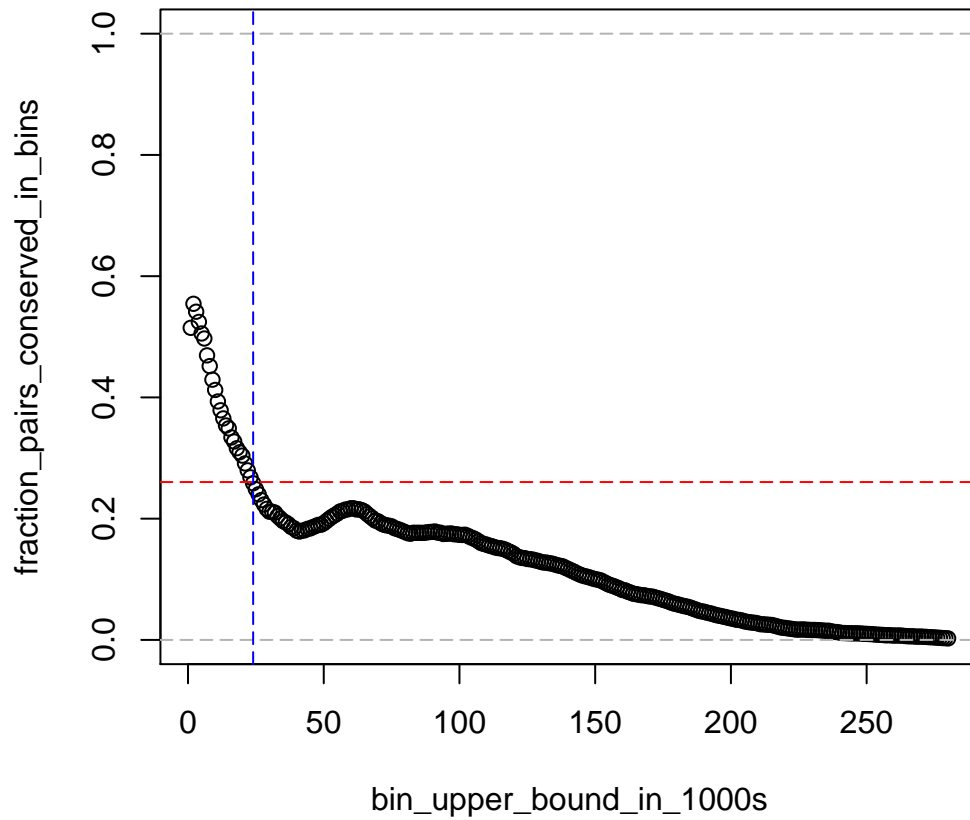

**Bin\_conservation\_minus\_bg\_CVA-1\_vs\_PBCV1**  
**PD-0.632272**

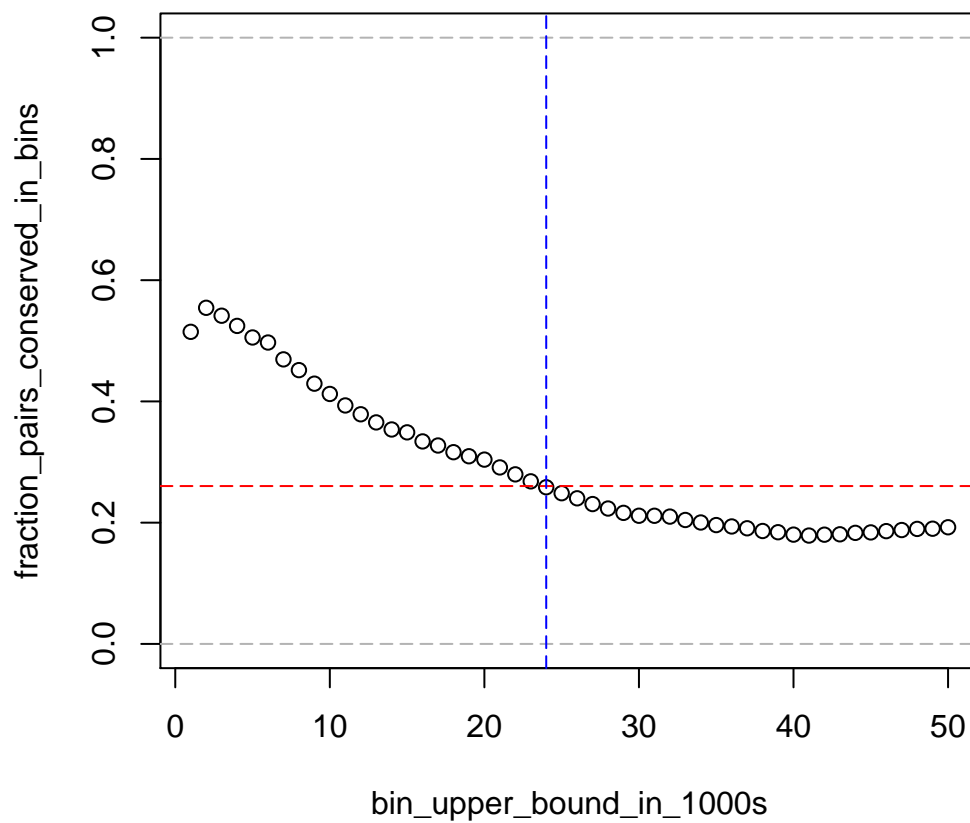

Supplement: s1 [file s1]

**Bin\_conservation\_minus\_bg\_Can0610SP\_vs\_CVM-1**  
**PD-0.459626**

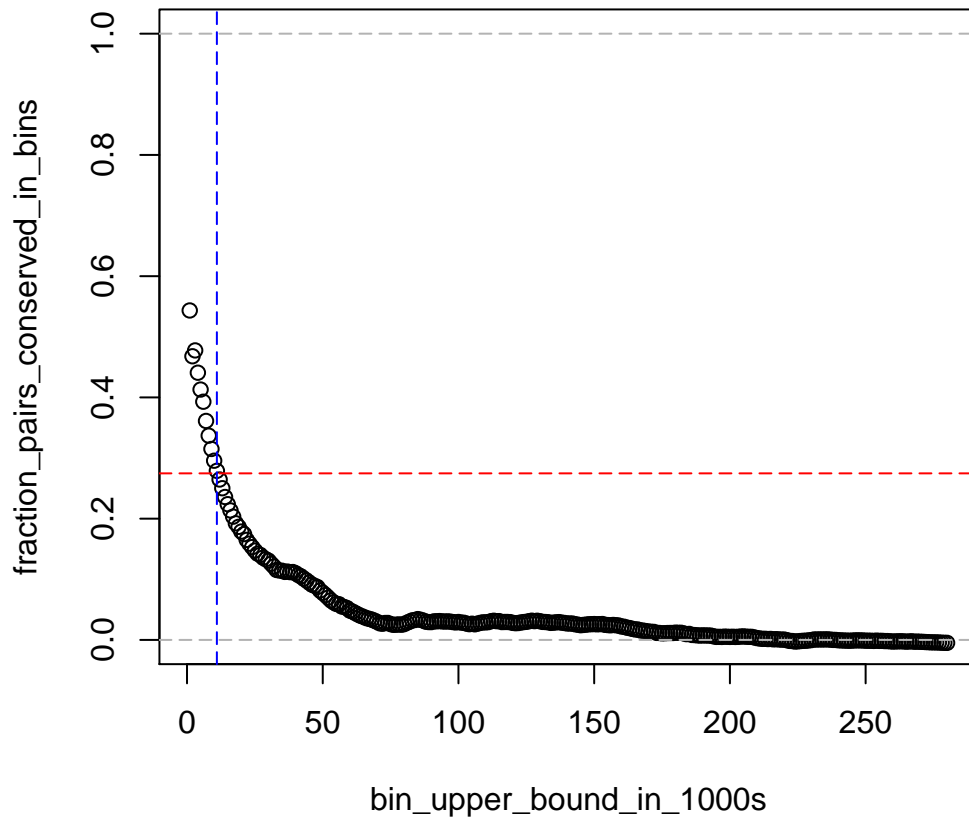

**Bin\_conservation\_minus\_bg\_Can0610SP\_vs\_CVM-1**  
**PD-0.459626**

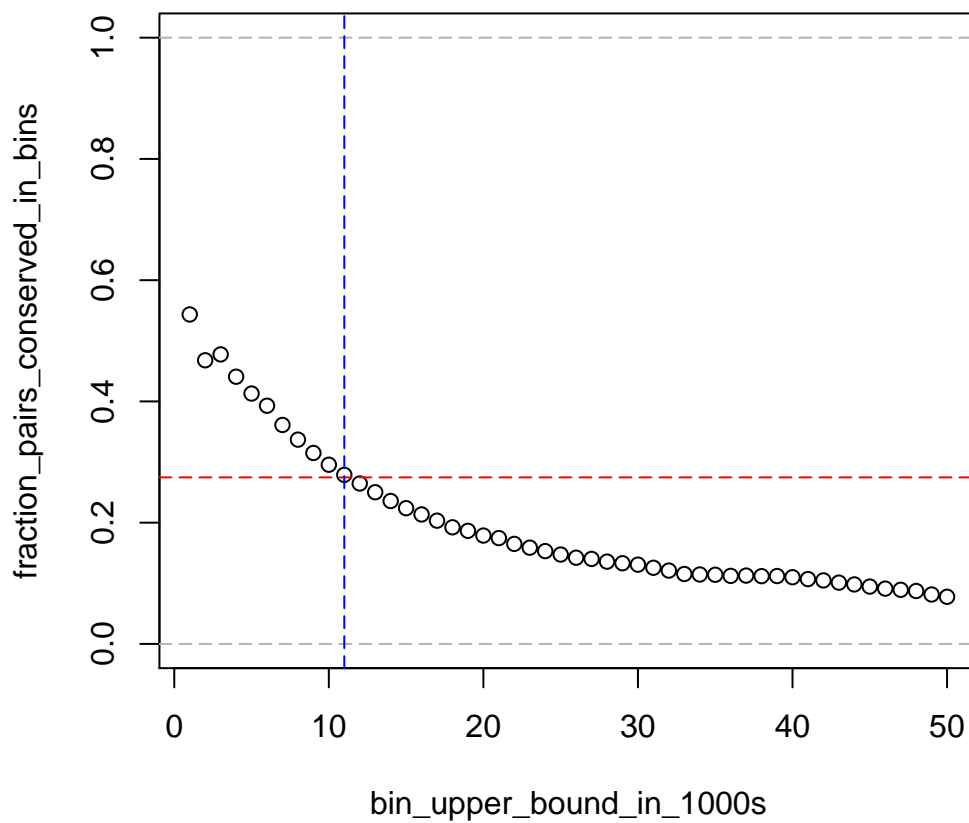

Supplement: s1 [file s1]

**Bin\_conservation\_minus\_bg\_Can0610SP\_vs\_Canal-1**  
**PD-0.11409**

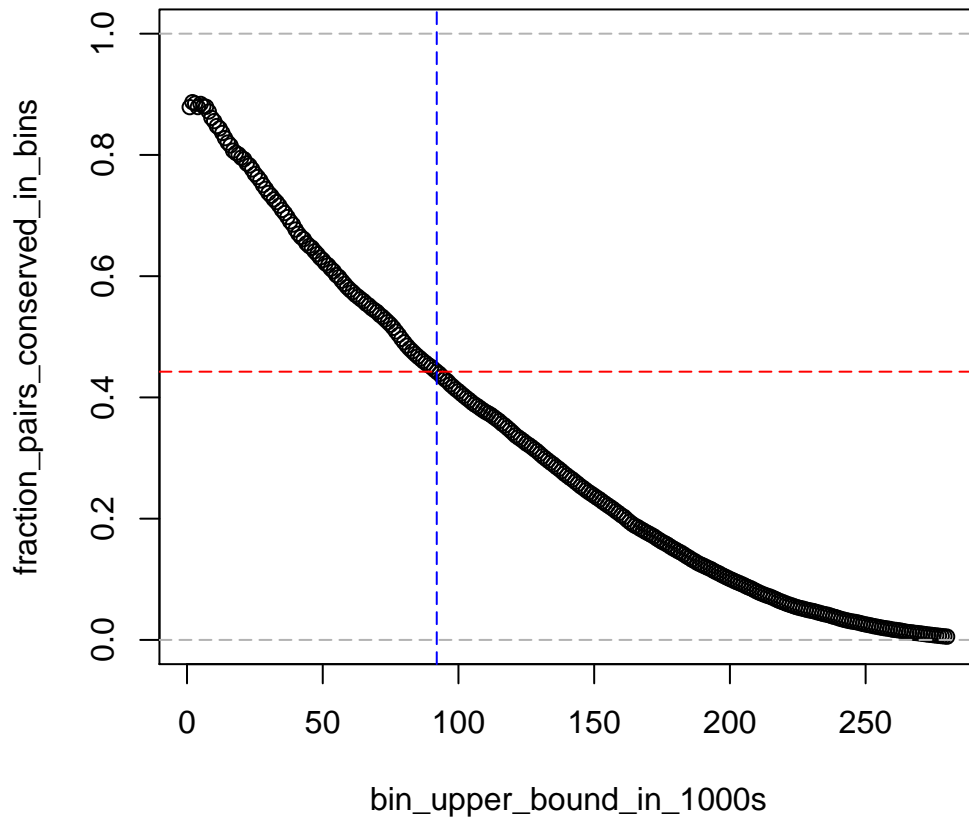

**Bin\_conservation\_minus\_bg\_Can0610SP\_vs\_Canal-1**  
**PD-0.11409**

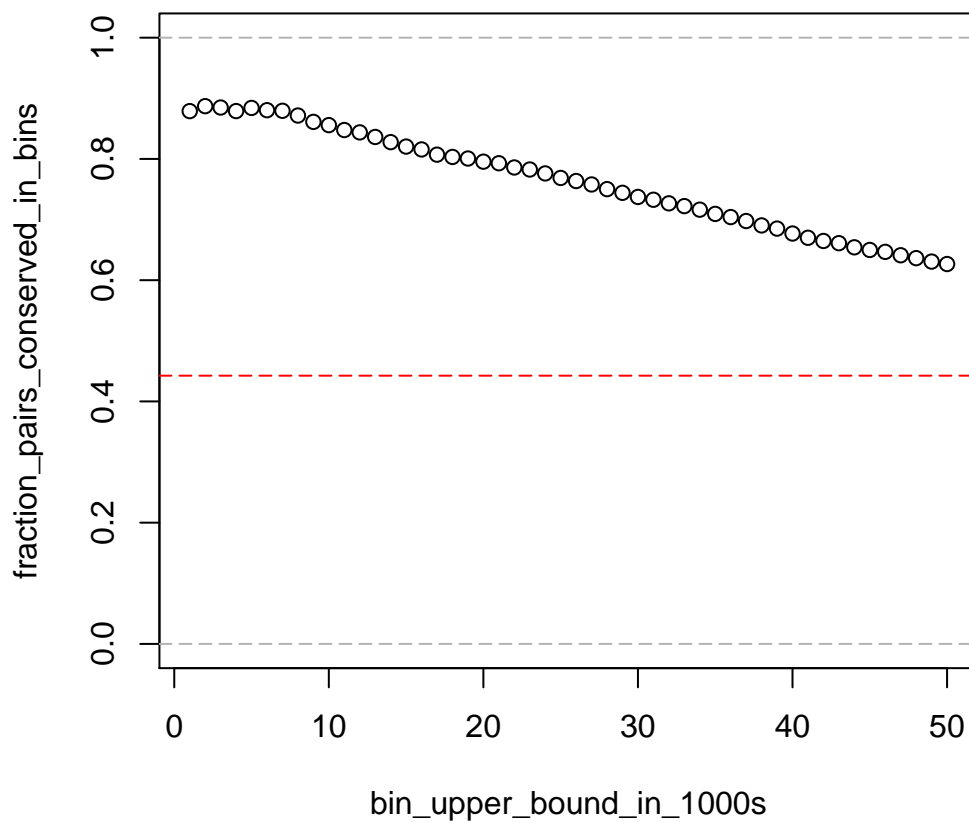

Supplement: s1 [file s1]

**Bin\_conservation\_minus\_bg\_Br0604L\_vs\_WI0606**  
**PD-0.065399**

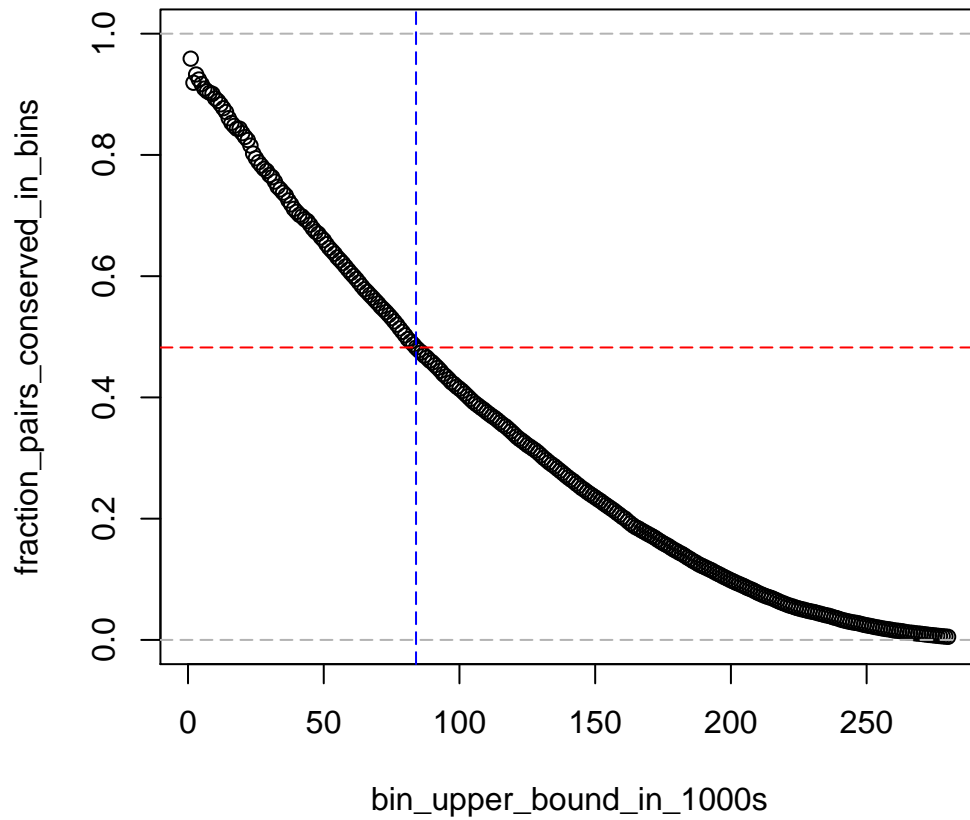

**Bin\_conservation\_minus\_bg\_Br0604L\_vs\_WI0606**  
**PD-0.065399**

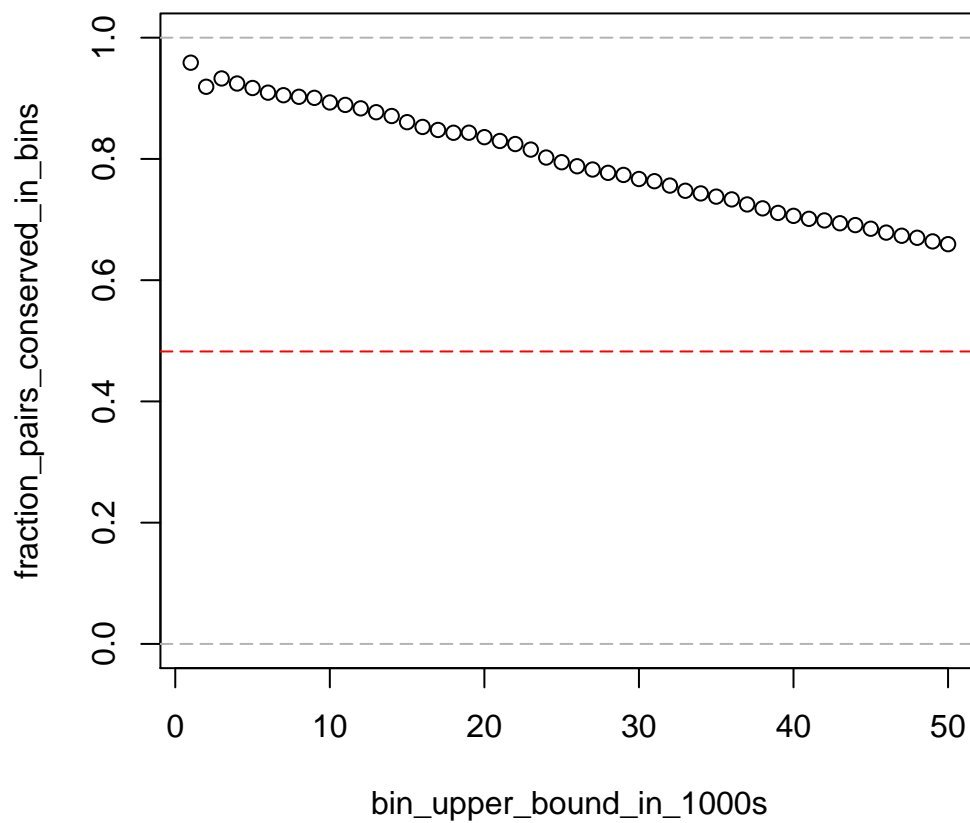

Supplement: s1 [file s1]

**Bin\_conservation\_minus\_bg\_CZ-2\_vs\_KS1B**  
**PD-0.656317**

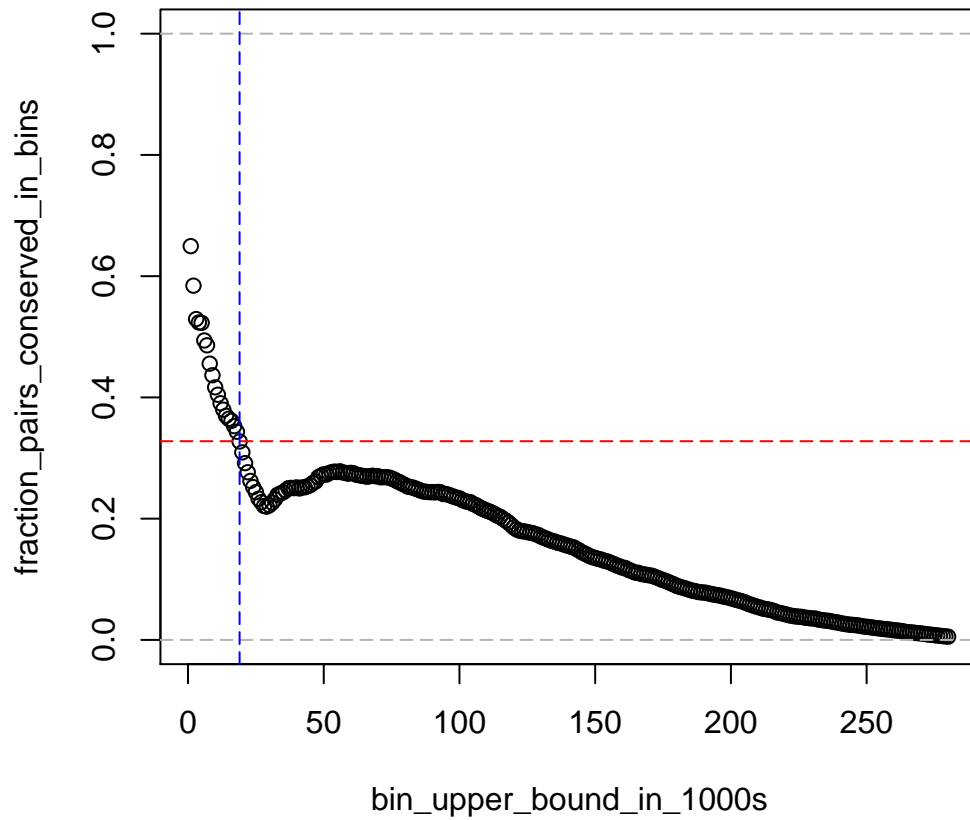

**Bin\_conservation\_minus\_bg\_CZ-2\_vs\_KS1B**  
**PD-0.656317**

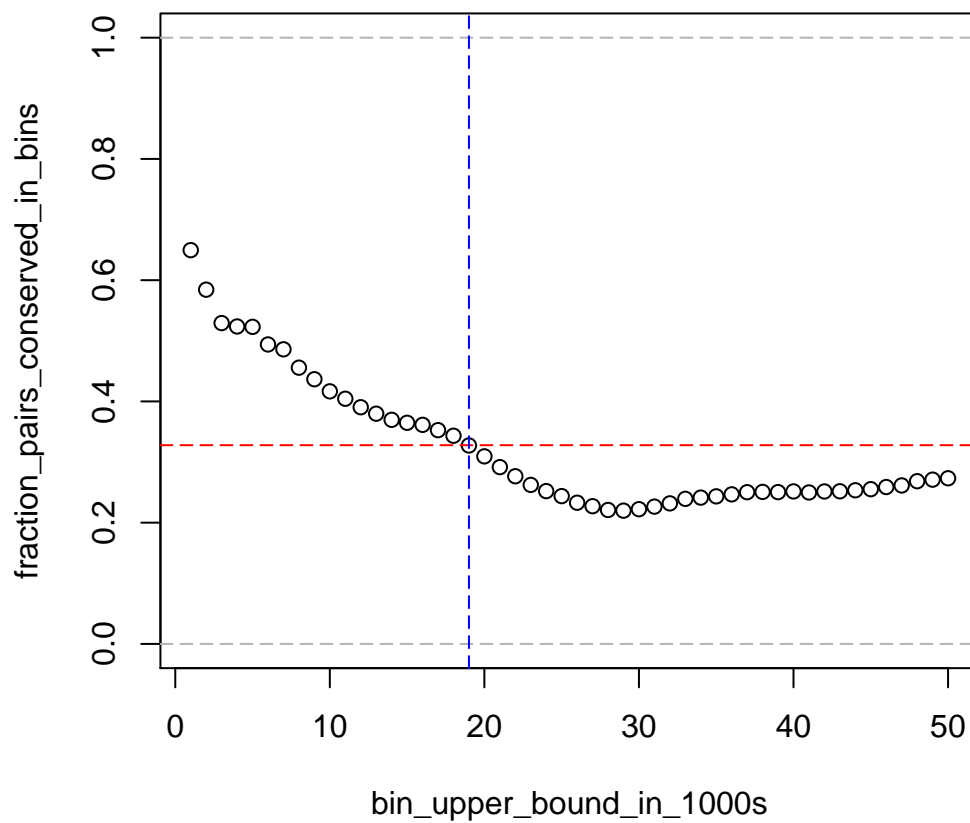

Supplement: s1 [file s1]

**Bin\_conservation\_minus\_bg\_MA-1E\_vs\_OR0704.3**  
**PD-0.694932**

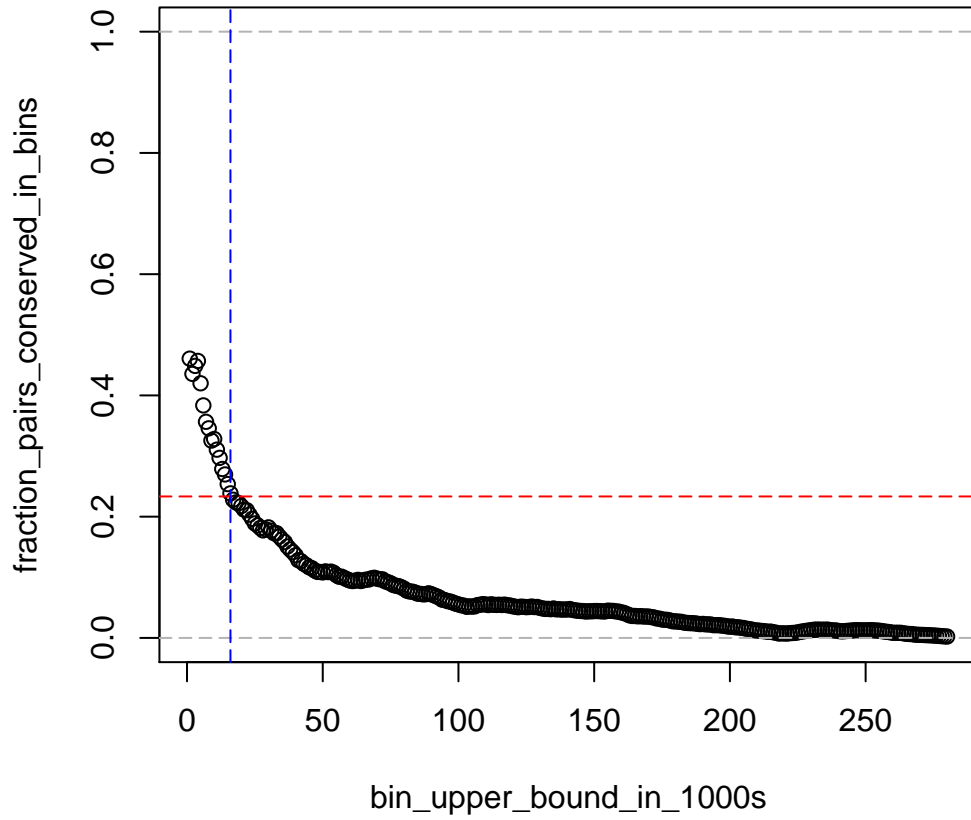

**Bin\_conservation\_minus\_bg\_MA-1E\_vs\_OR0704.3**  
**PD-0.694932**

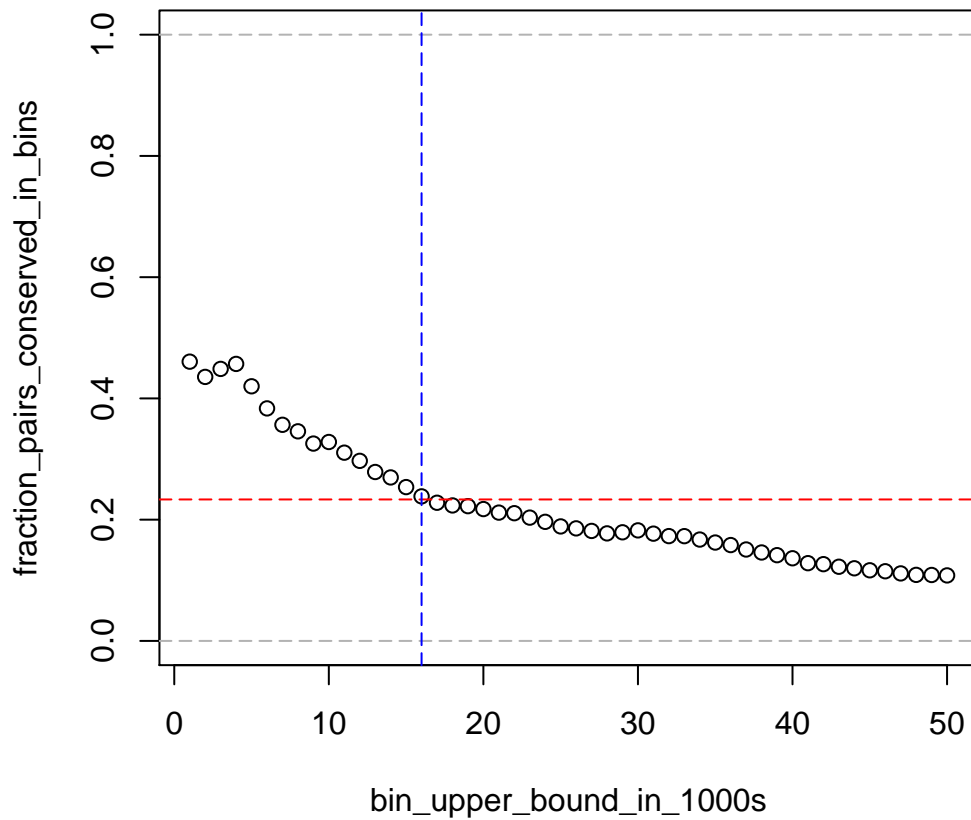

Supplement: s1 [file s1]

**Bin\_conservation\_minus\_bg\_IL-5-2s1\_vs\_NE-JV-4**  
**PD-0.135708**

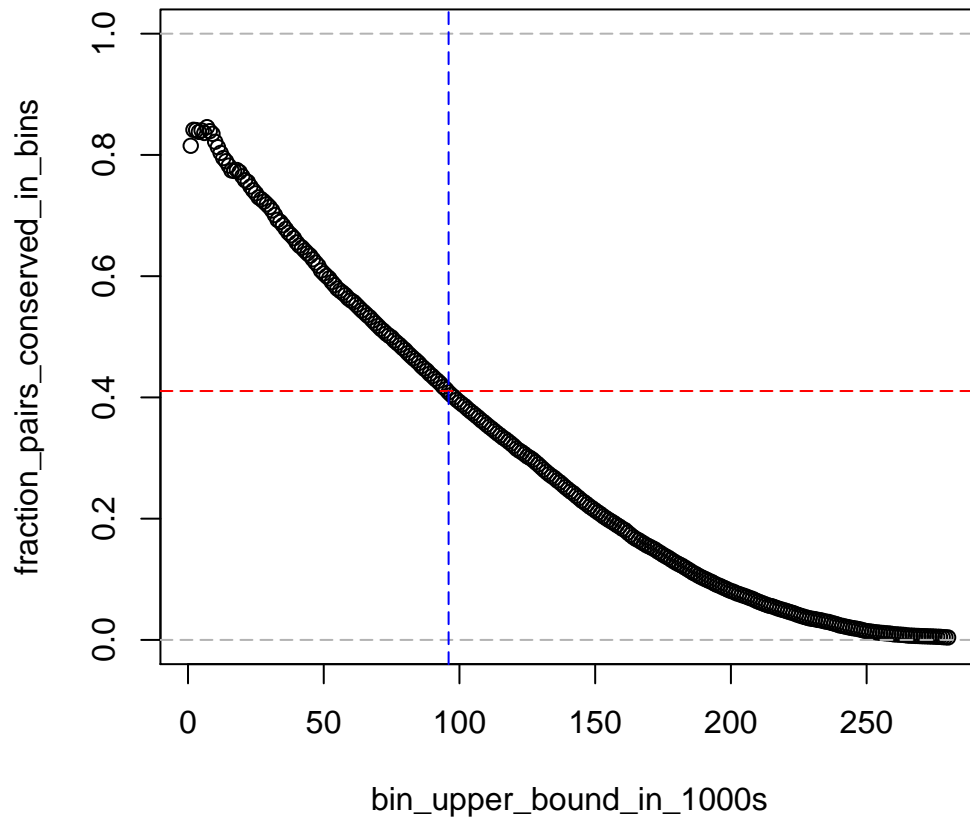

**Bin\_conservation\_minus\_bg\_IL-5-2s1\_vs\_NE-JV-4**  
**PD-0.135708**

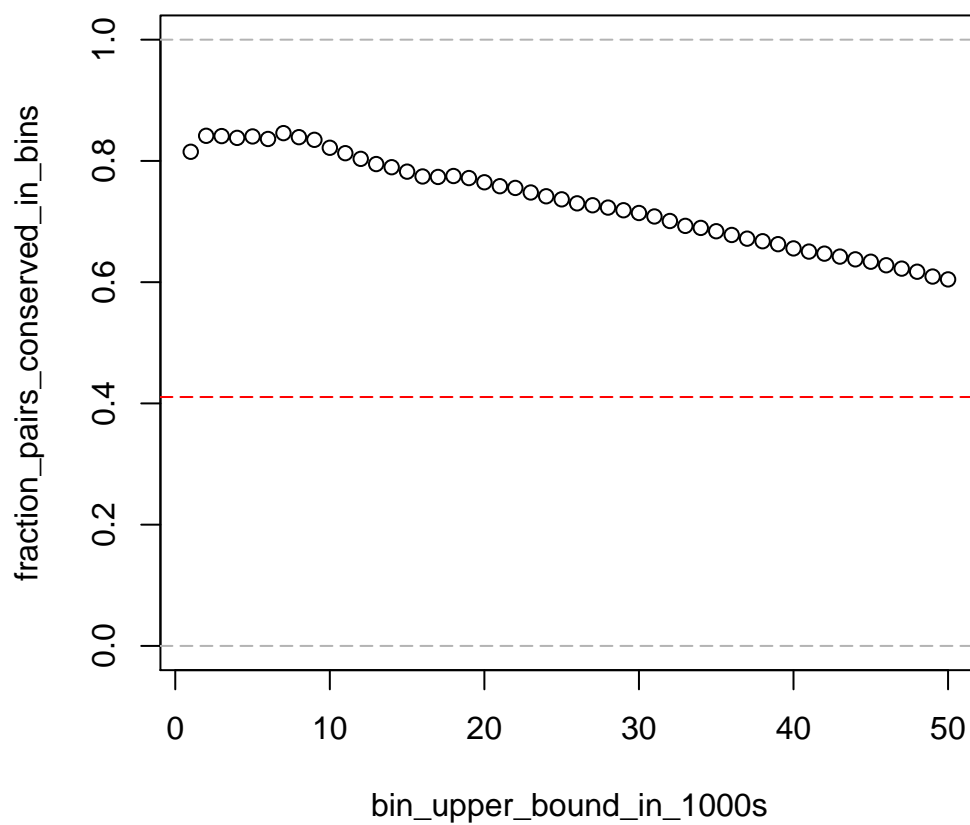

Supplement: s1 [file s1]

**Bin\_conservation\_minus\_bg\_OR0704.2.2\_vs\_OR0704.3**  
**PD-0.459642**

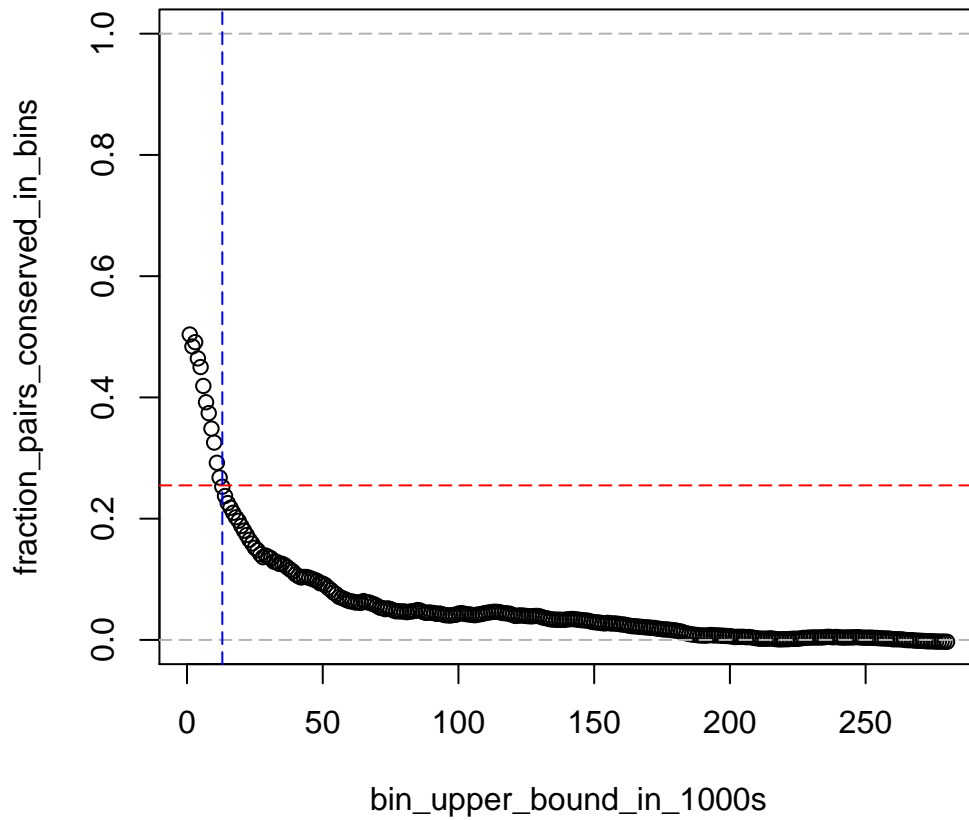

**Bin\_conservation\_minus\_bg\_OR0704.2.2\_vs\_OR0704.3**  
**PD-0.459642**

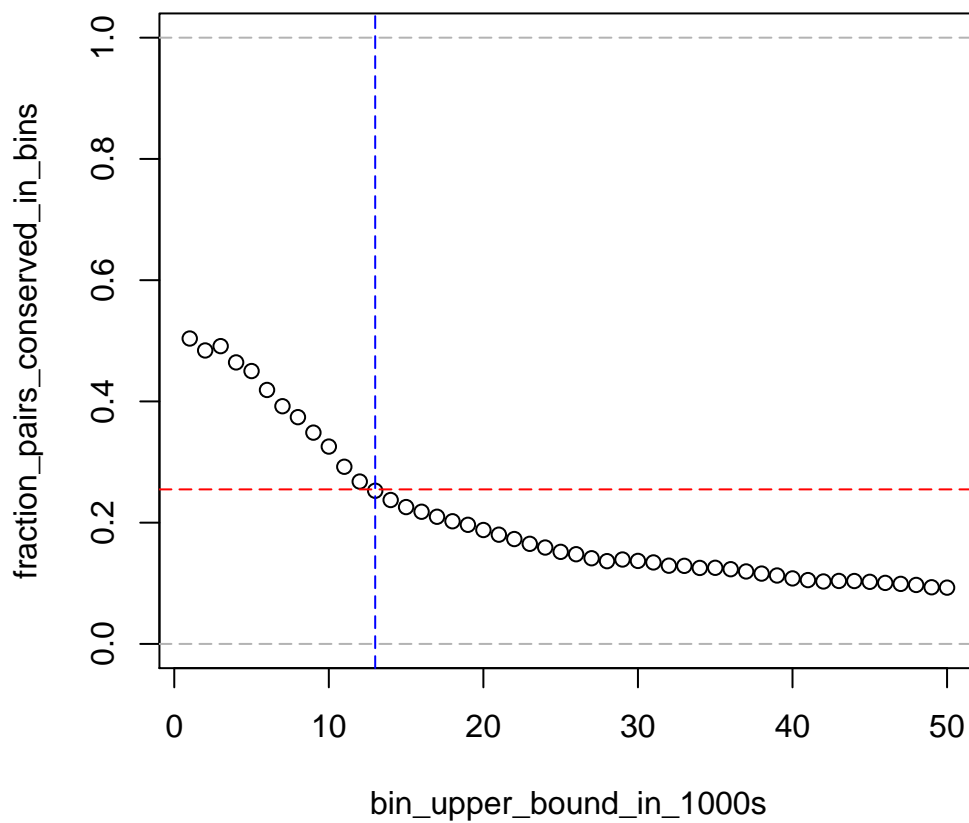

Supplement: s1 [file s1]

**Bin\_conservation\_minus\_bg\_CVR-1\_vs\_MA-1D**  
**PD-0.656356**

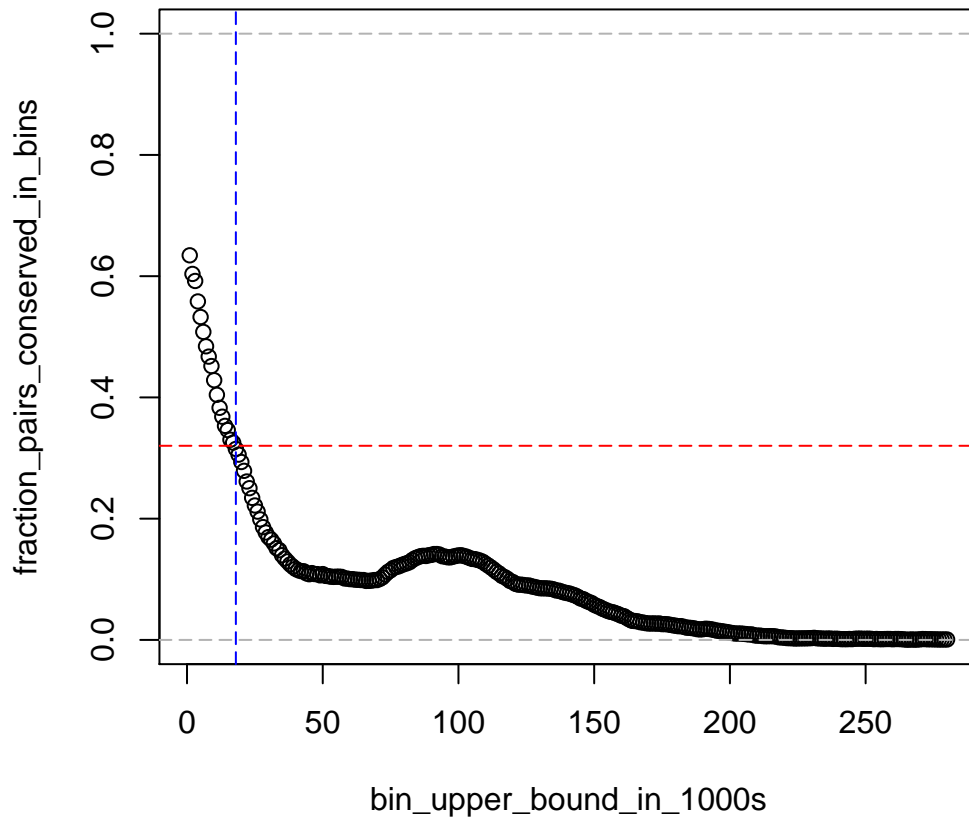

**Bin\_conservation\_minus\_bg\_CVR-1\_vs\_MA-1D**  
**PD-0.656356**

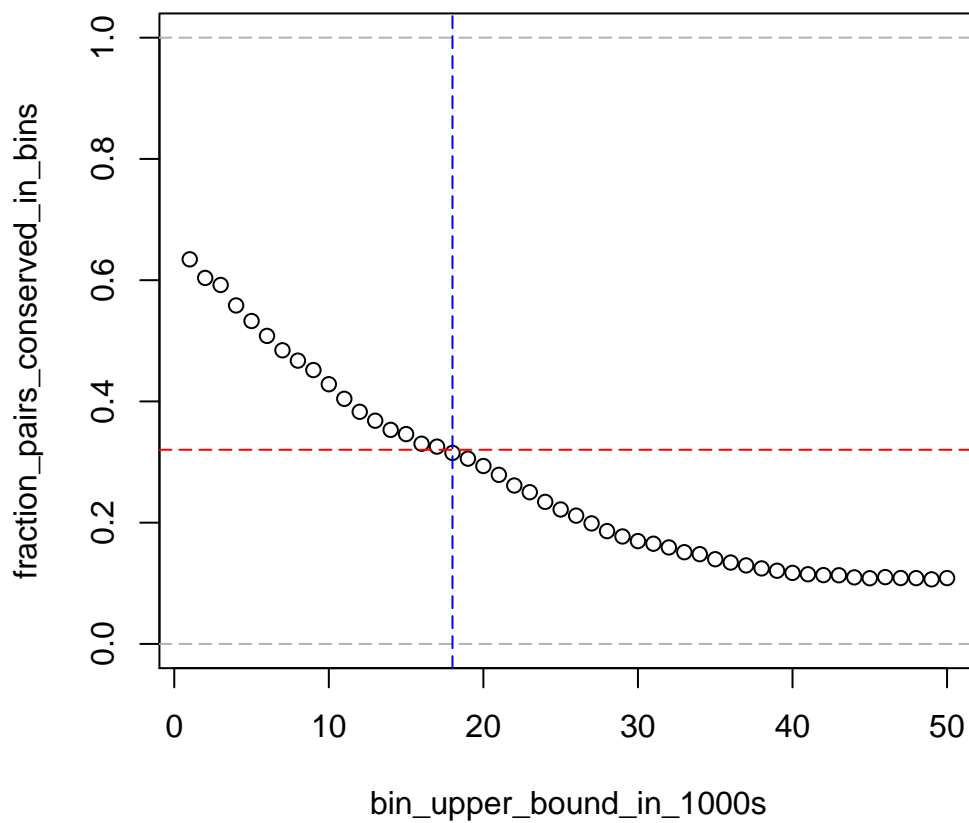

Supplement: s1 [file s1]

**Bin\_conservation\_minus\_bg\_Br0604L\_vs\_MN0810.1**  
**PD-0.100248**

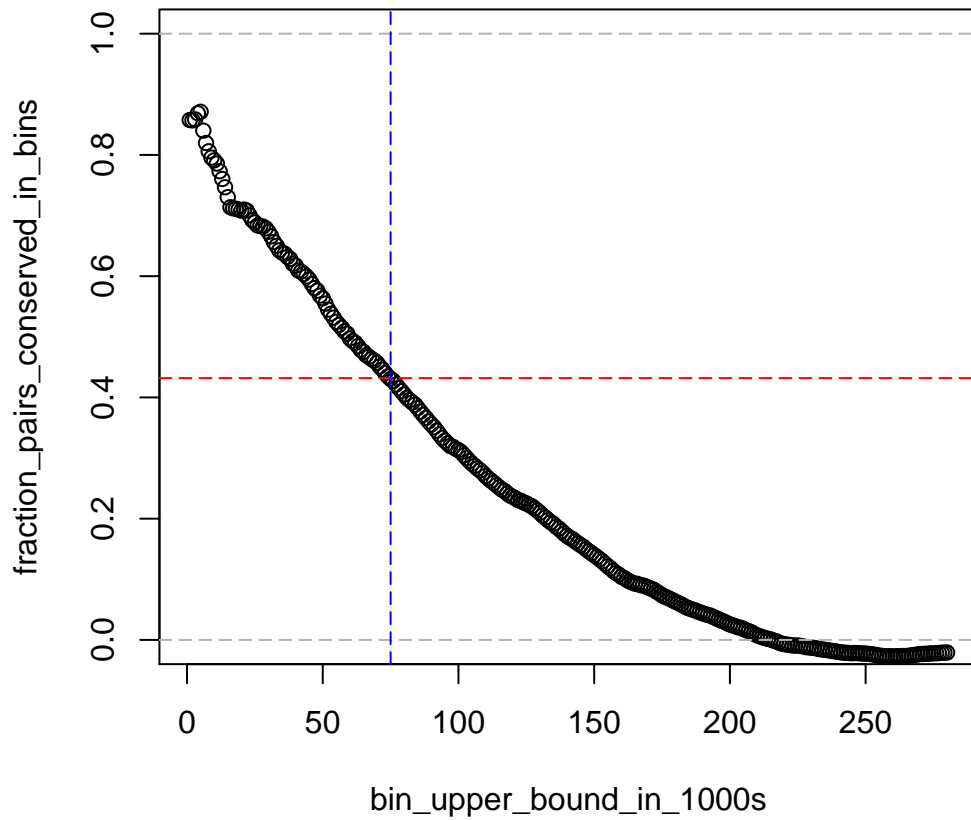

**Bin\_conservation\_minus\_bg\_Br0604L\_vs\_MN0810.1**  
**PD-0.100248**

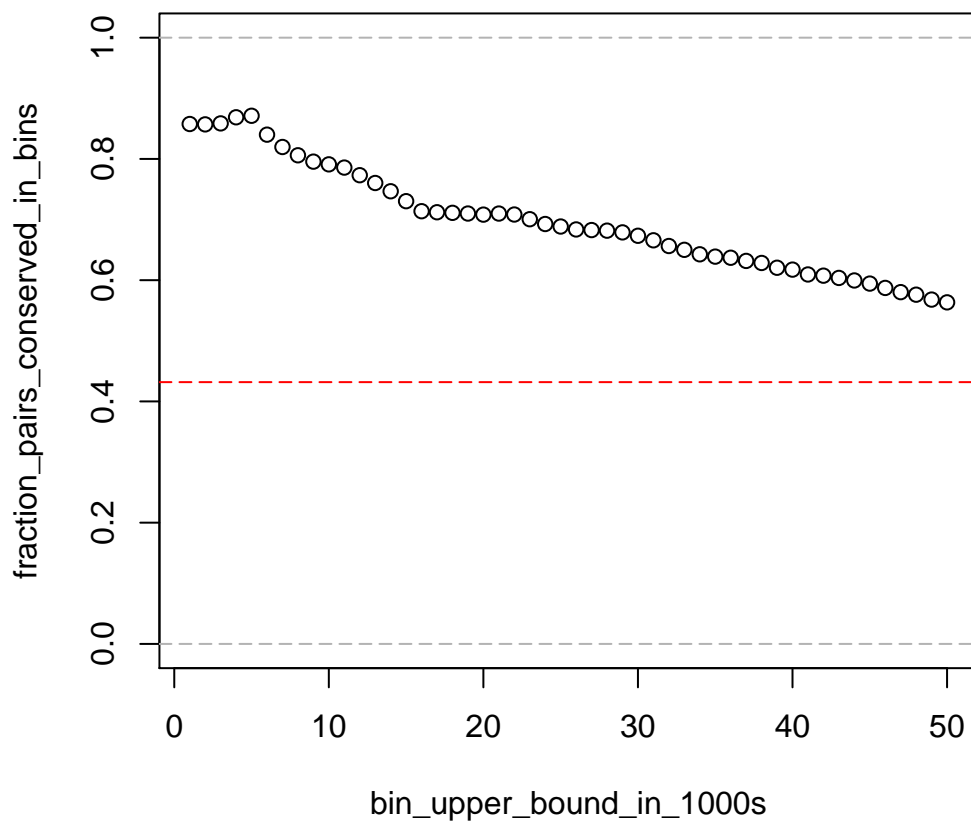

Supplement: s1 [file s1]

**Bin\_conservation\_minus\_bg\_AP110A\_vs\_CVA-1**  
**PD-0.009549**

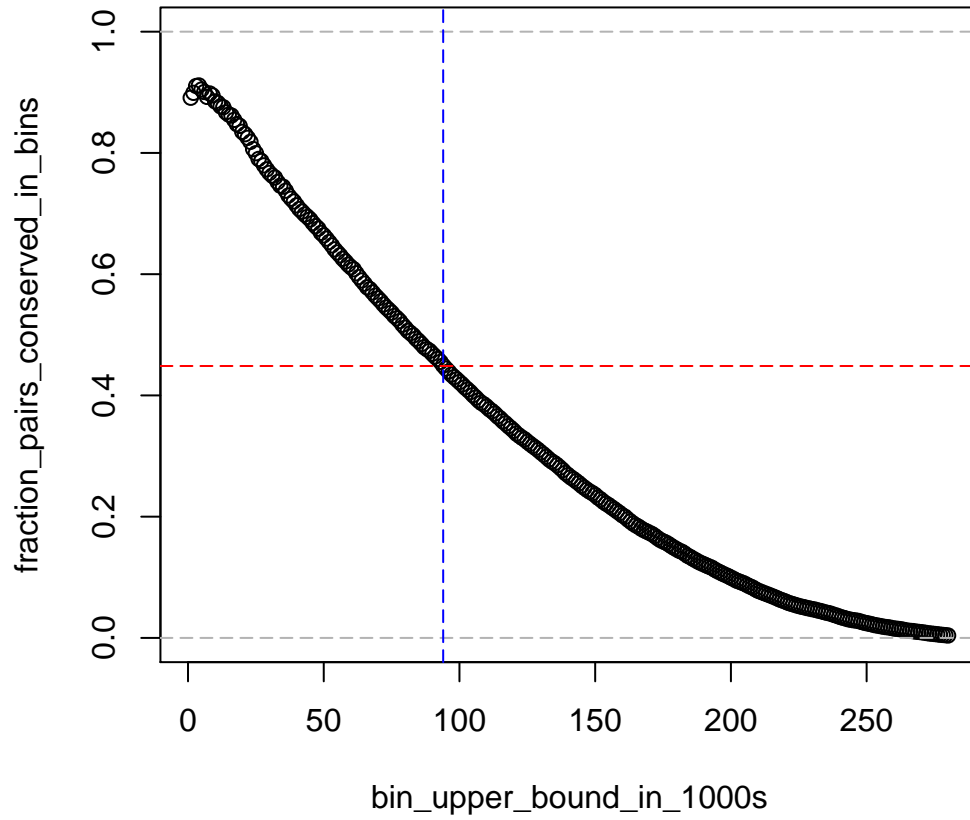

**Bin\_conservation\_minus\_bg\_AP110A\_vs\_CVA-1**  
**PD-0.009549**

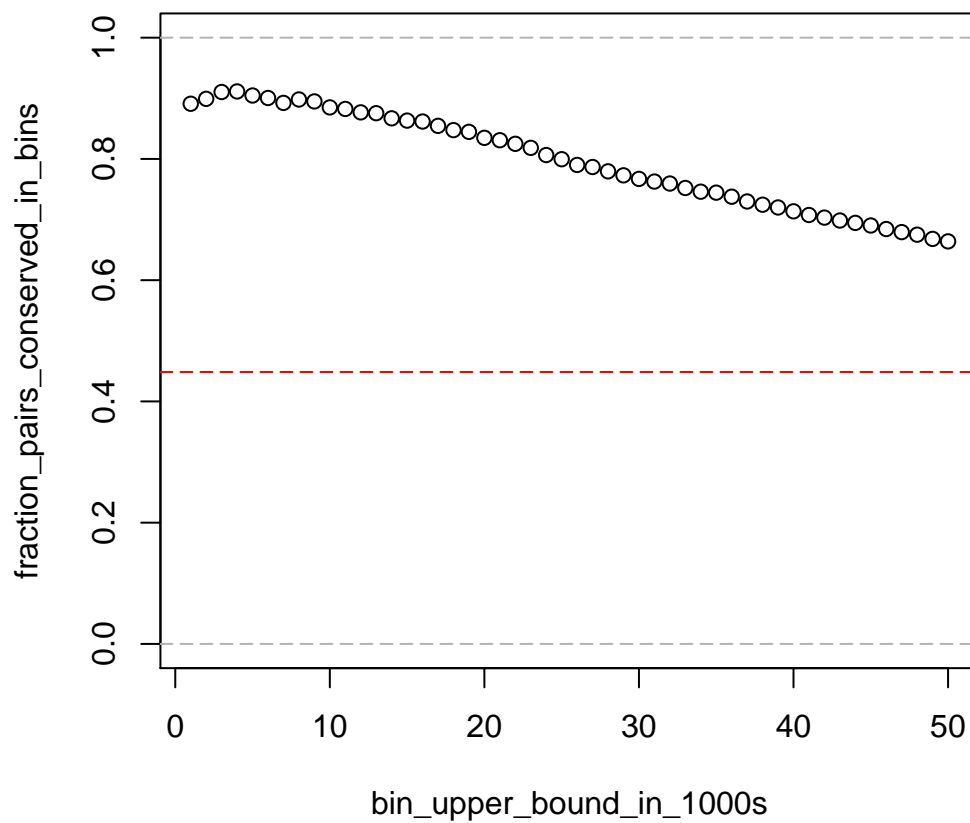

Supplement: s1 [file s1]

**Bin\_conservation\_minus\_bg\_CVR-1\_vs\_GM0701.1**  
**PD-0.447322**

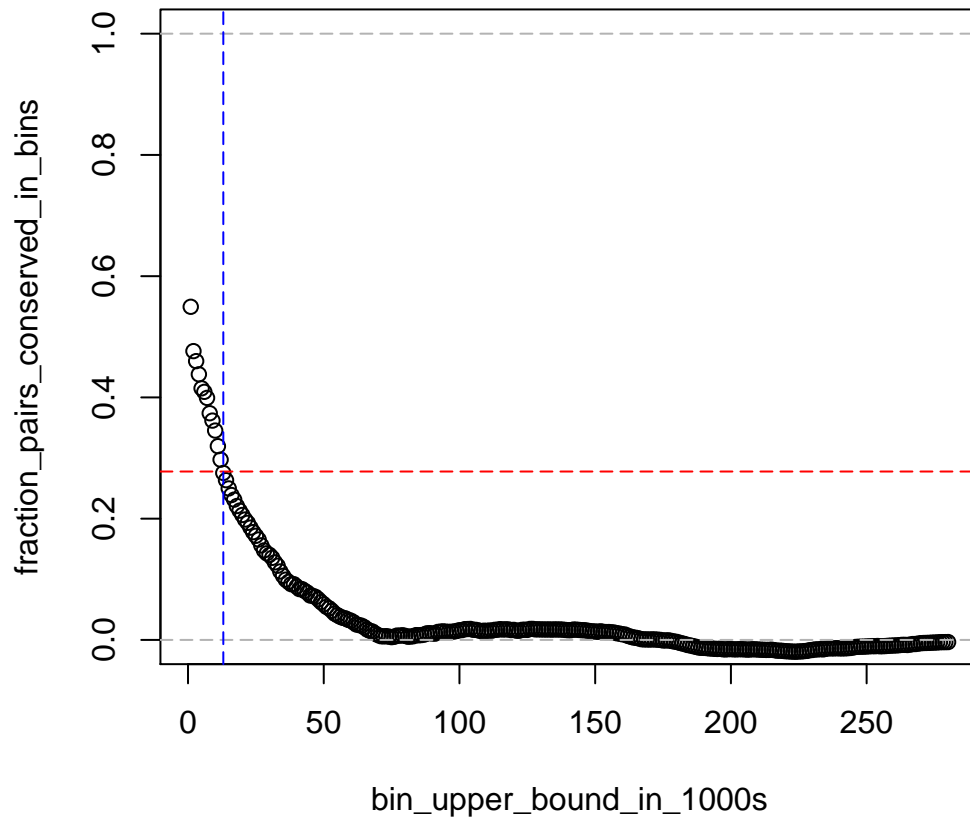

**Bin\_conservation\_minus\_bg\_CVR-1\_vs\_GM0701.1**  
**PD-0.447322**

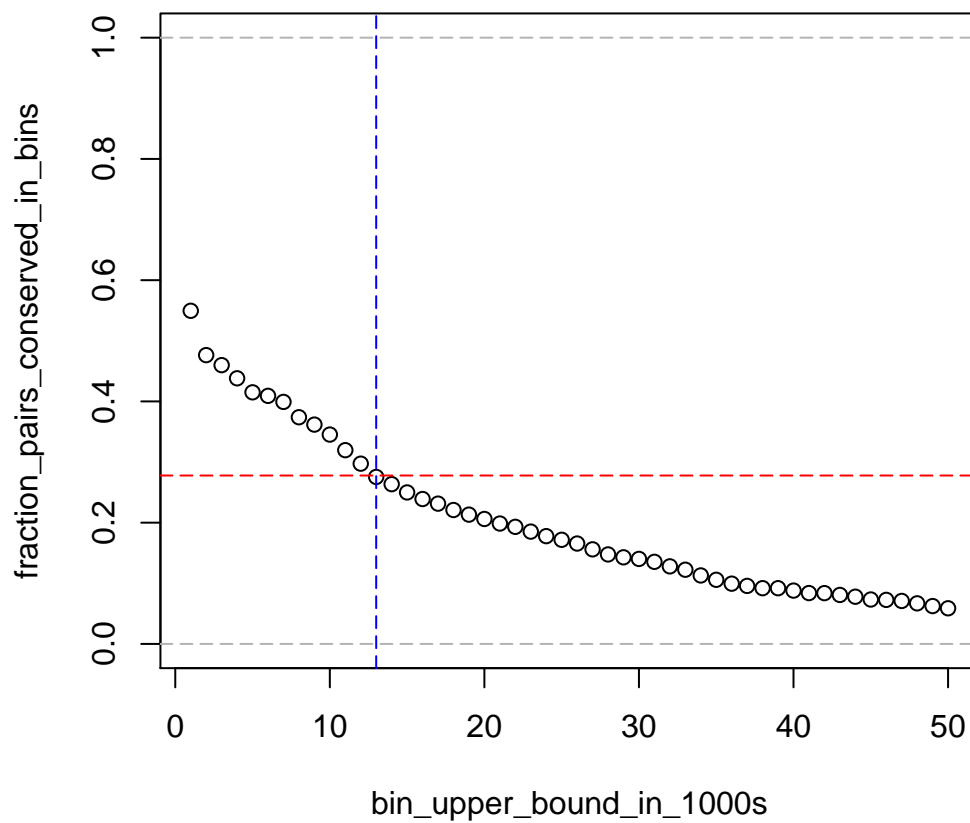

Supplement: s1 [file s1]

**Bin\_conservation\_minus\_bg\_CVA-1\_vs\_IL-5-2s1**  
**PD-0.658883**

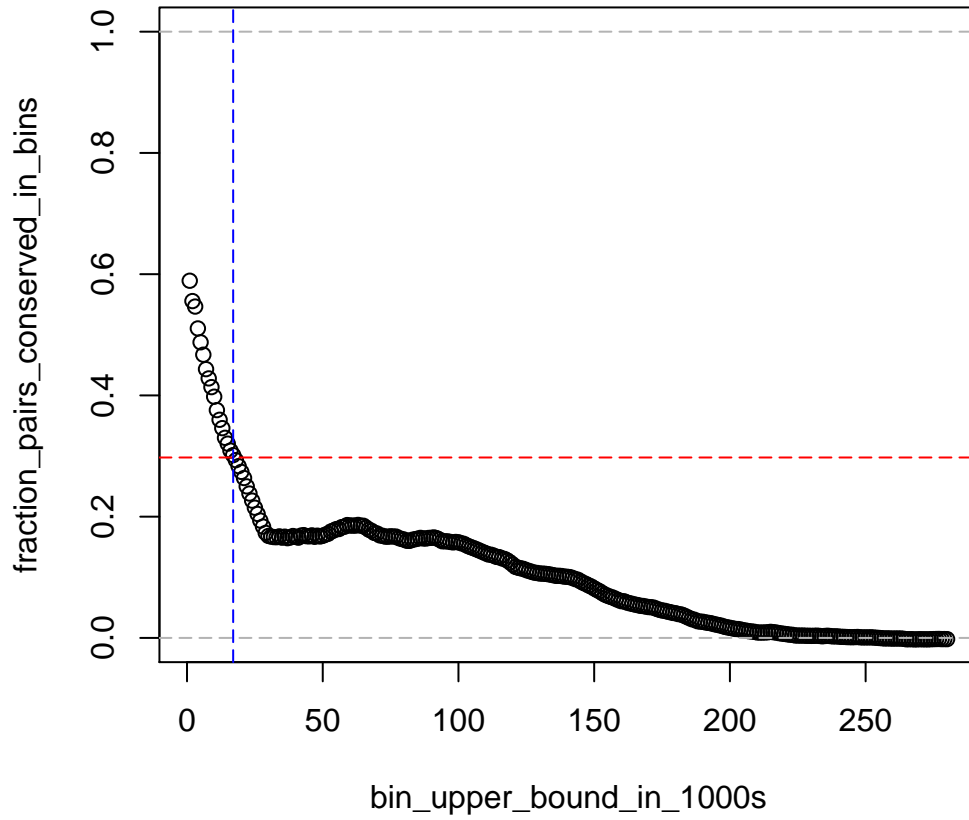

**Bin\_conservation\_minus\_bg\_CVA-1\_vs\_IL-5-2s1**  
**PD-0.658883**

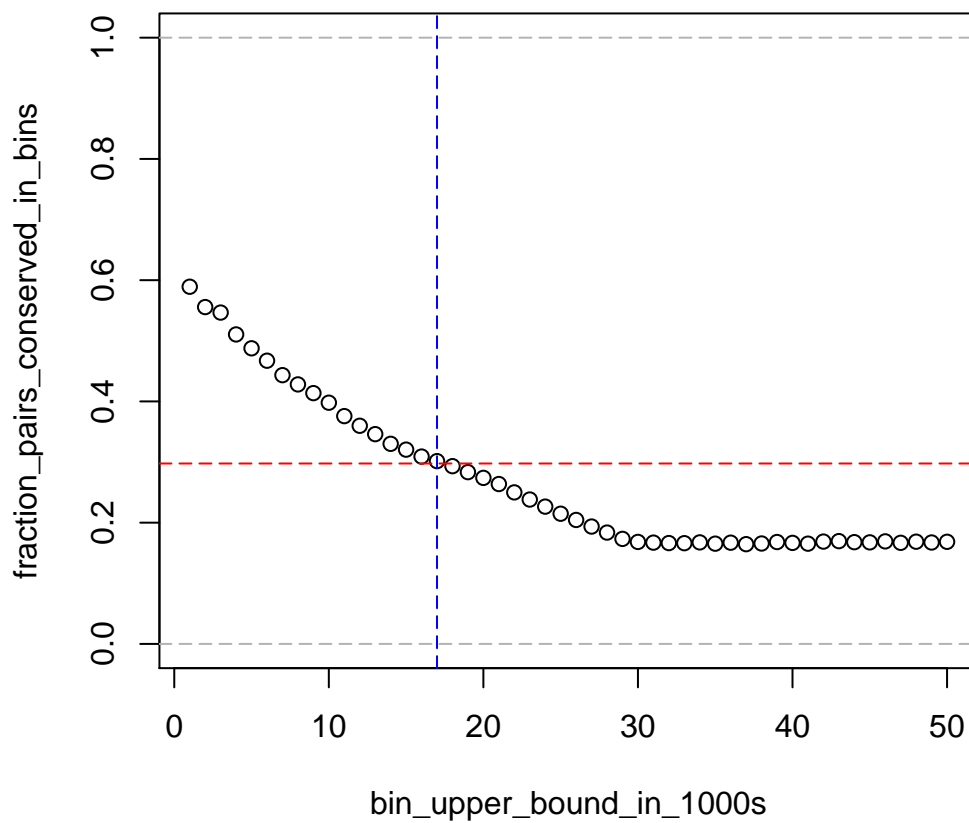

Supplement: s1 [file s1]

**Bin\_conservation\_minus\_bg\_AR158\_vs\_OR0704.3**  
**PD-0.705667**

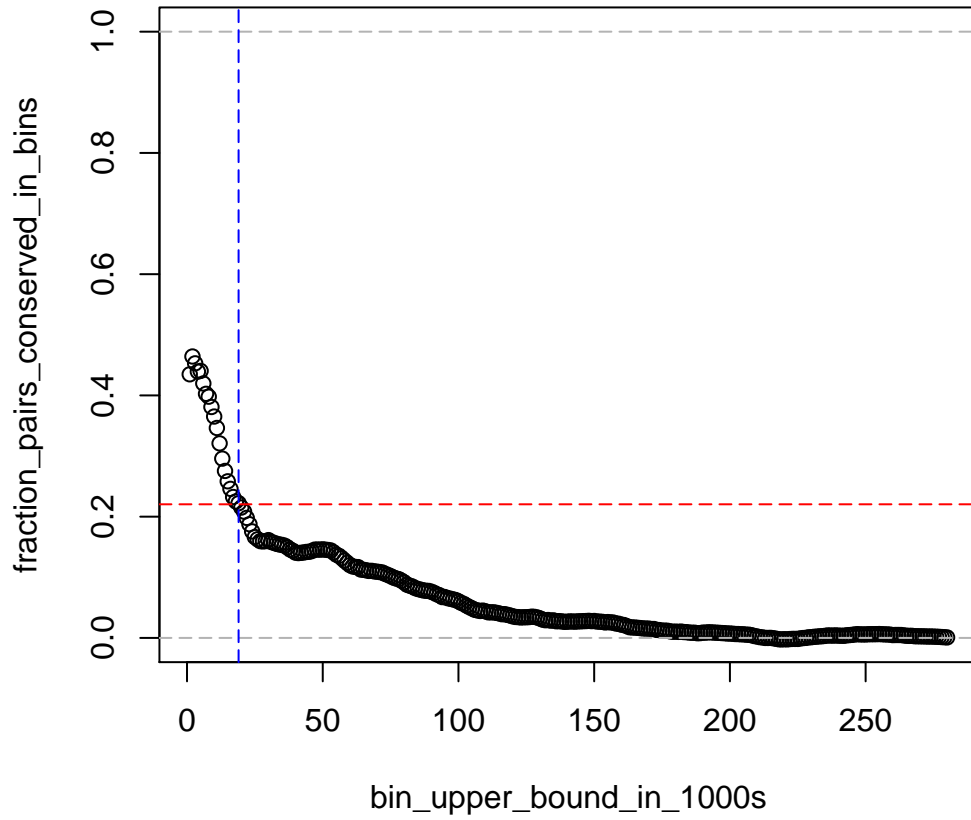

**Bin\_conservation\_minus\_bg\_AR158\_vs\_OR0704.3**  
**PD-0.705667**

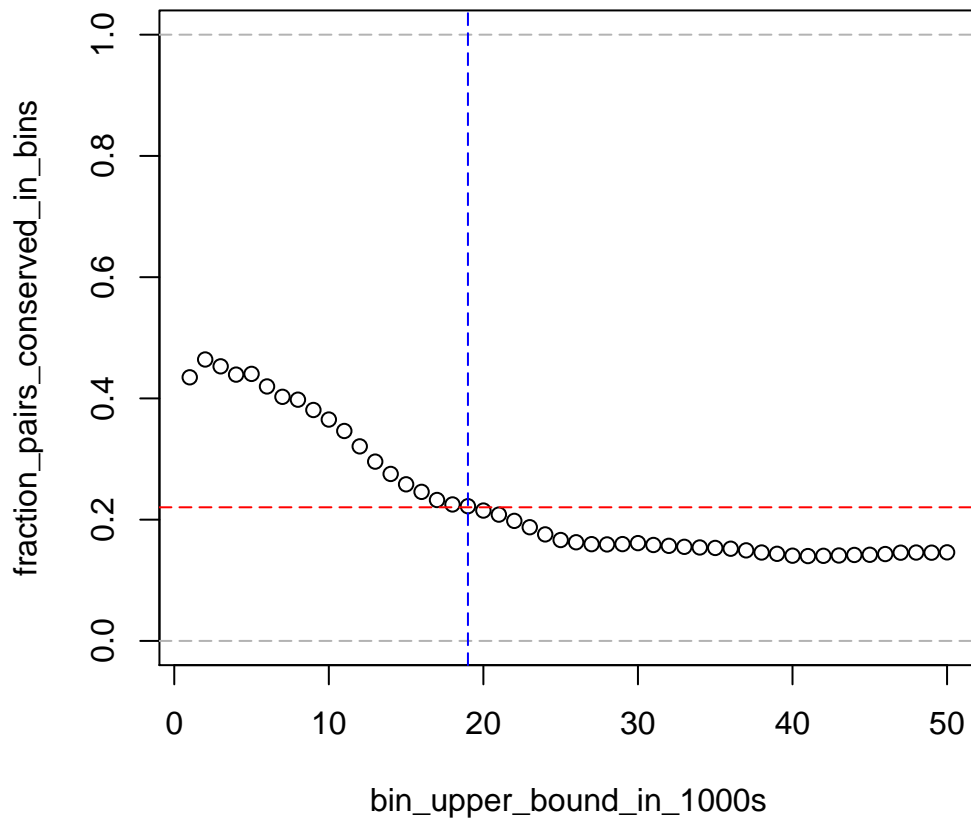

Supplement: s1 [file s1]

**Bin\_conservation\_minus\_bg\_Canal-1\_vs\_NTS-1**  
**PD-0.108811**

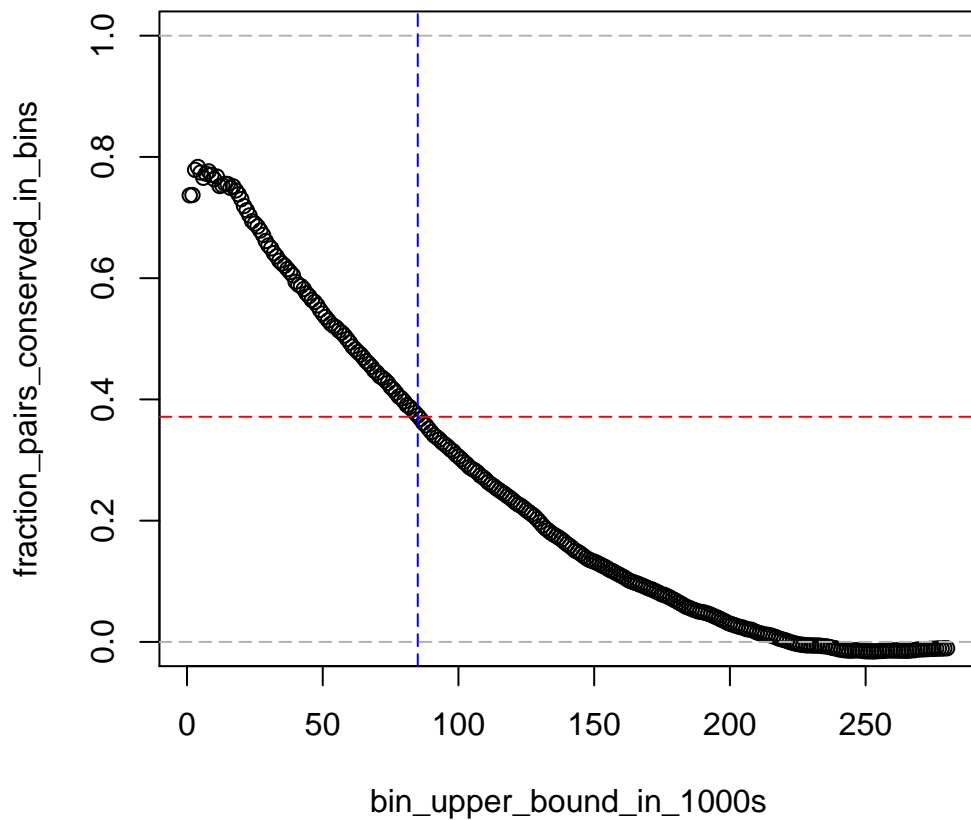

**Bin\_conservation\_minus\_bg\_Canal-1\_vs\_NTS-1**  
**PD-0.108811**

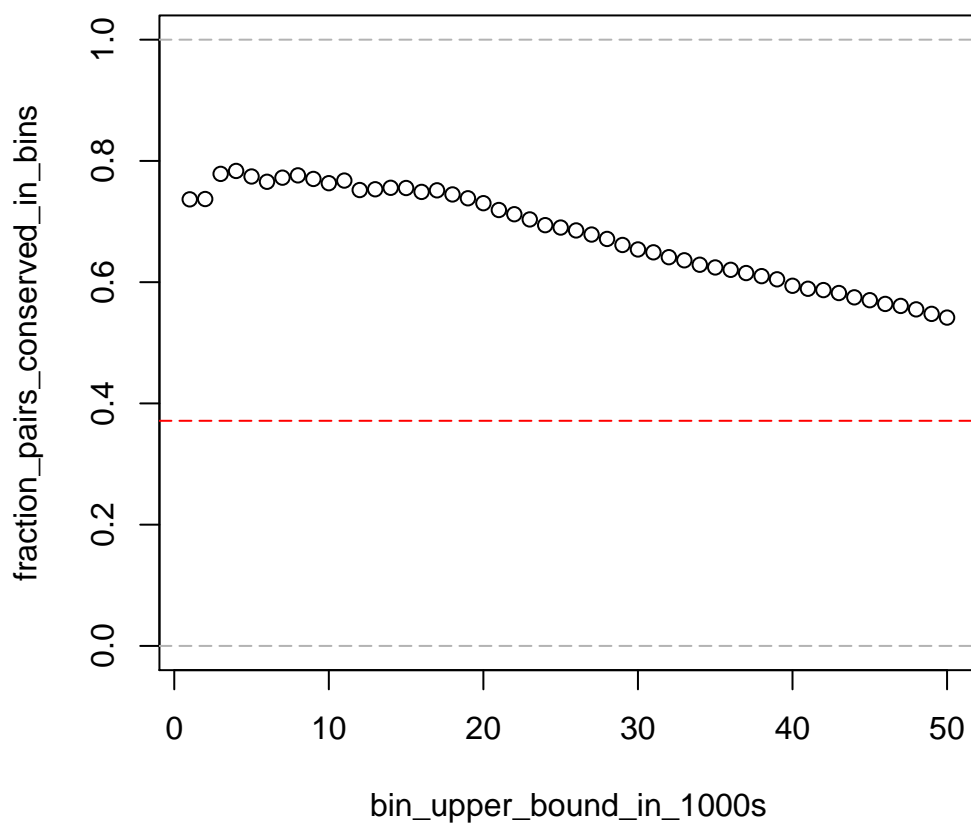

Supplement: s1 [file s1]

**Bin\_conservation\_minus\_bg\_AN69C\_vs\_NW665.2**  
**PD-0.639343**

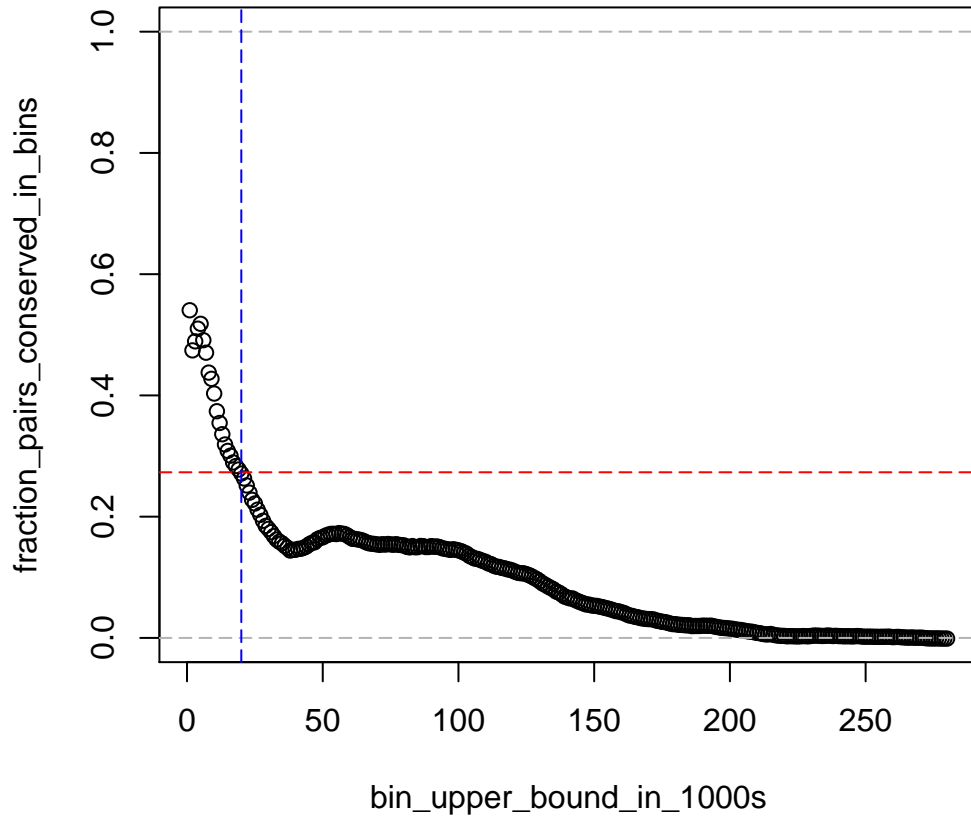

**Bin\_conservation\_minus\_bg\_AN69C\_vs\_NW665.2**  
**PD-0.639343**

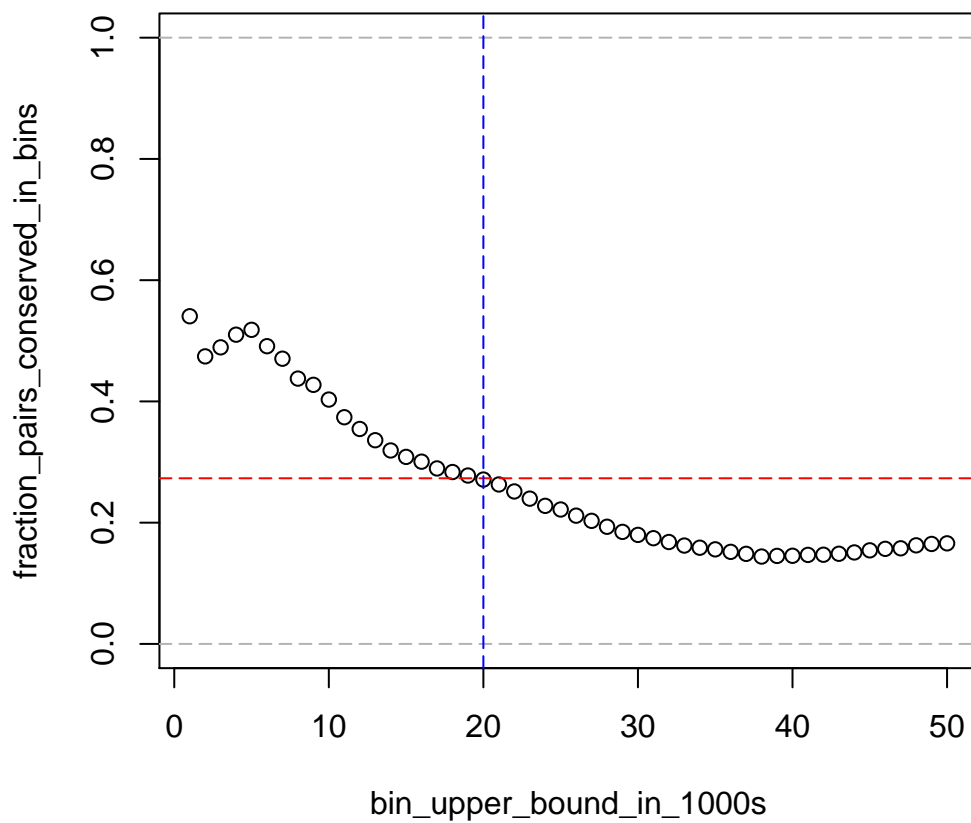

Supplement: s1 [file s1]

**Bin\_conservation\_minus\_bg\_AR158\_vs\_NE-JV-3**  
**PD-0.705999**

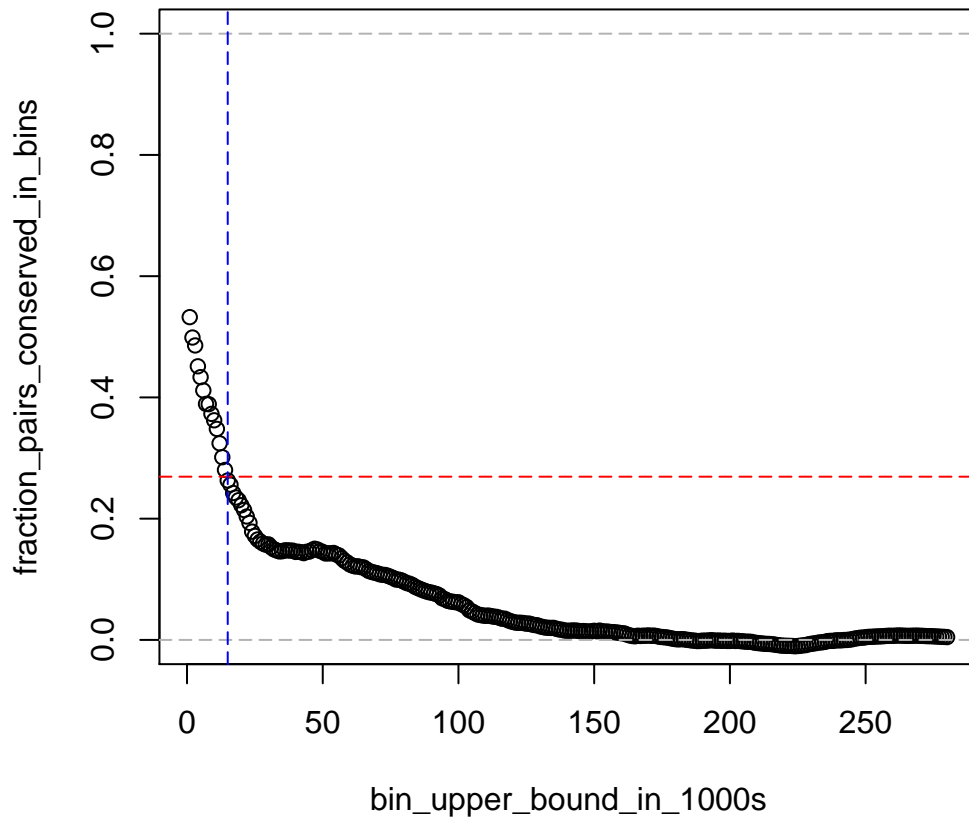

**Bin\_conservation\_minus\_bg\_AR158\_vs\_NE-JV-3**  
**PD-0.705999**

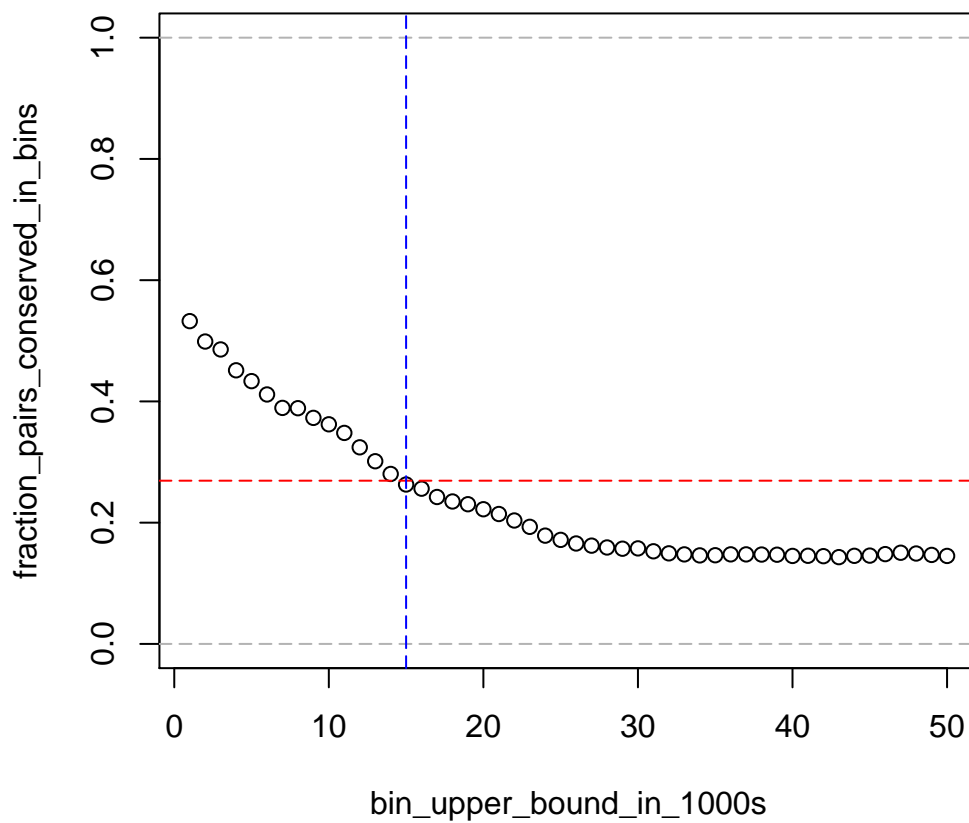

Supplement: s1 [file s1]

**Bin\_conservation\_minus\_bg\_Canal-1\_vs\_TN603.4.2**  
**PD-0.103502**

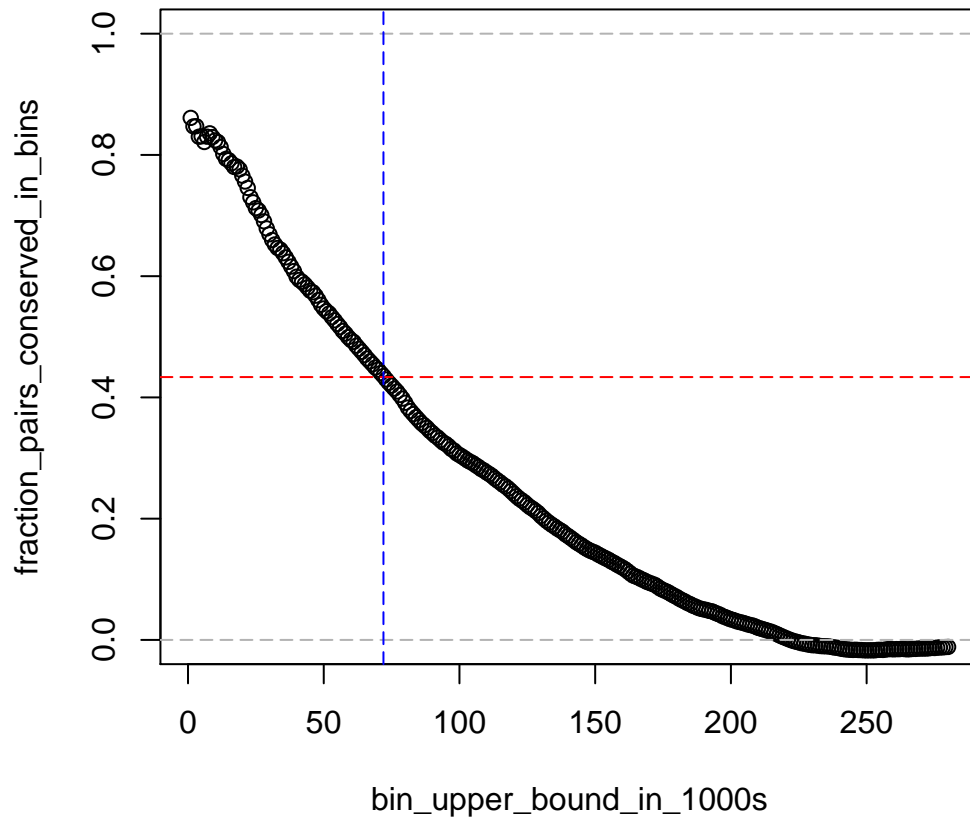

**Bin\_conservation\_minus\_bg\_Canal-1\_vs\_TN603.4.2**  
**PD-0.103502**

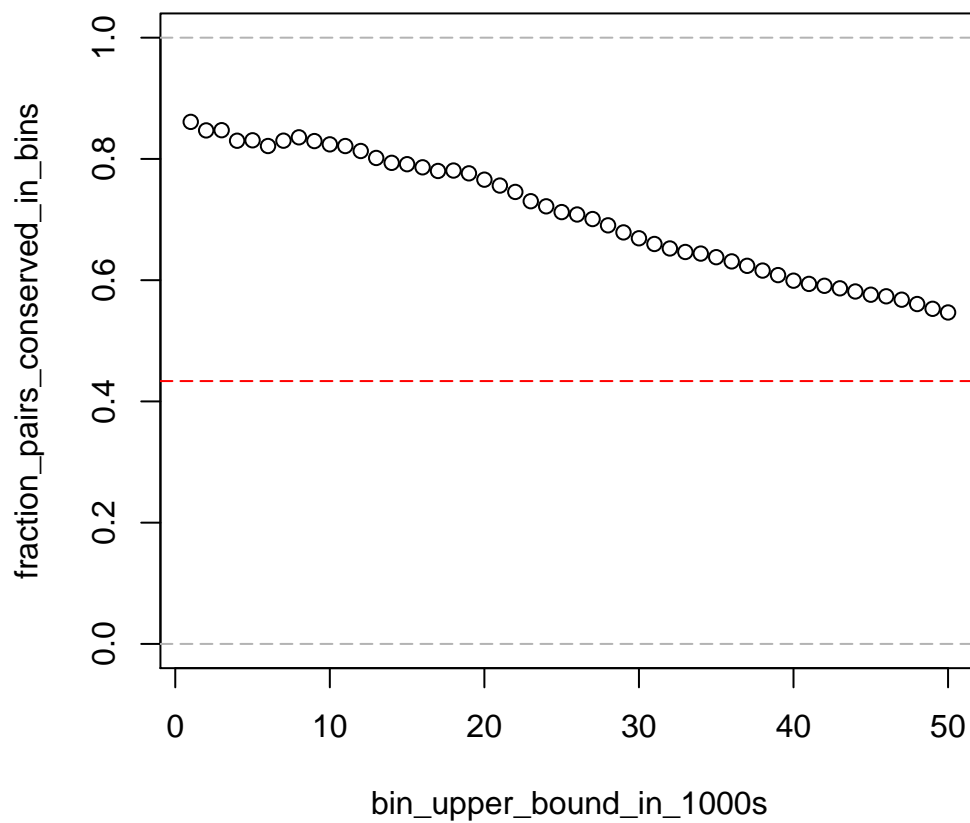

Supplement: s1 [file s1]

**Bin\_conservation\_minus\_bg\_CVA-1\_vs\_CVG-1**  
**PD-0.015089**

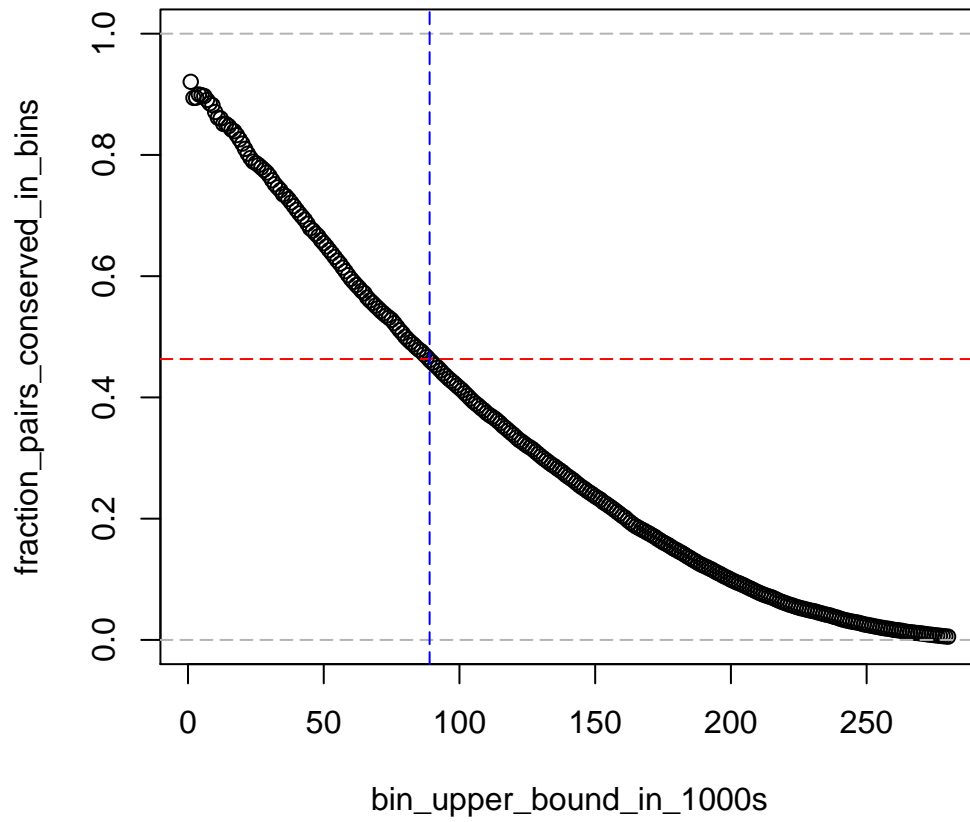

**Bin\_conservation\_minus\_bg\_CVA-1\_vs\_CVG-1**  
**PD-0.015089**

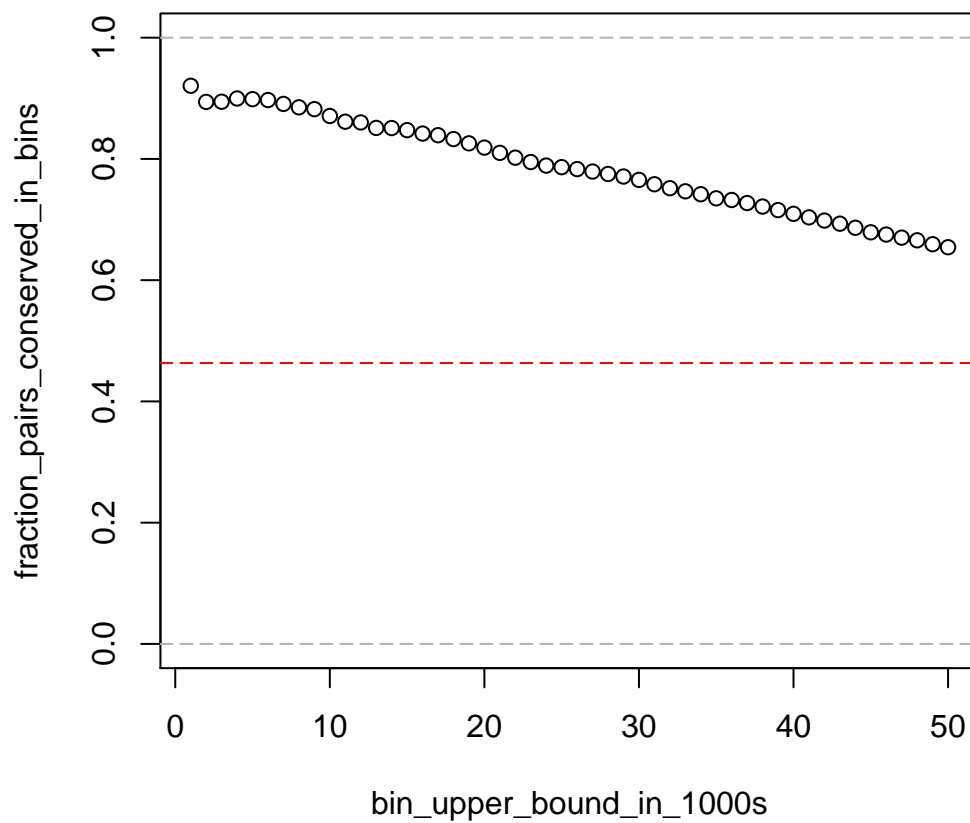

Supplement: s1 [file s1]

**Bin\_conservation\_minus\_bg\_GM0701.1\_vs\_MT325**  
**PD-0.448739**

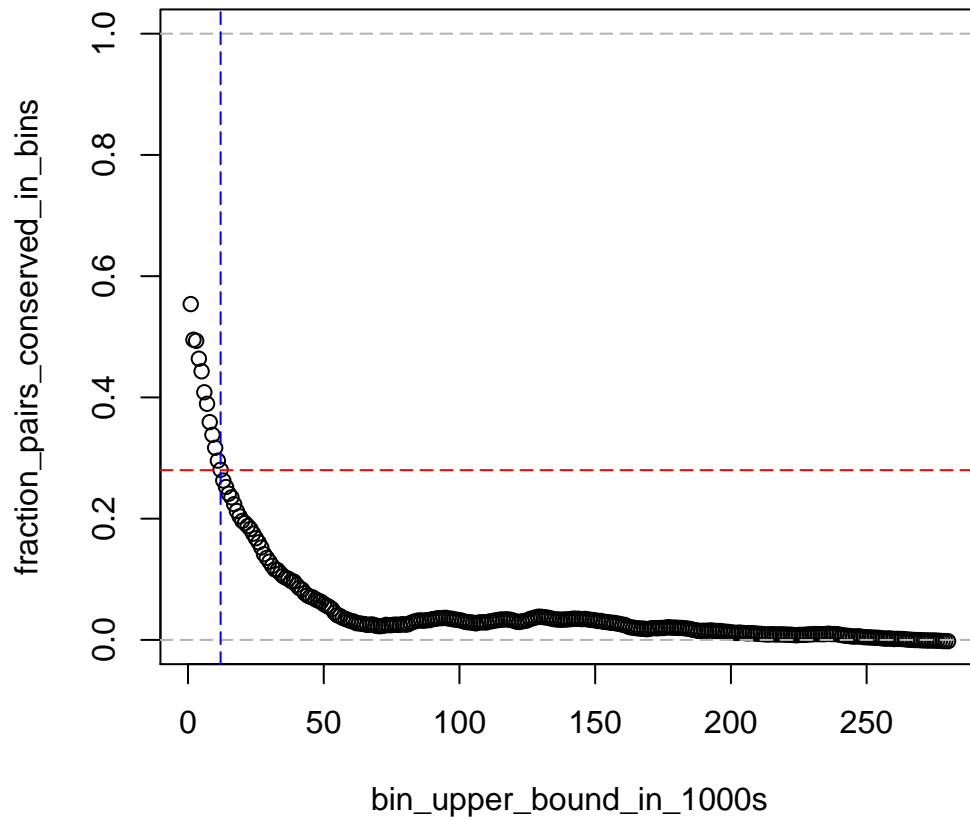

**Bin\_conservation\_minus\_bg\_GM0701.1\_vs\_MT325**  
**PD-0.448739**

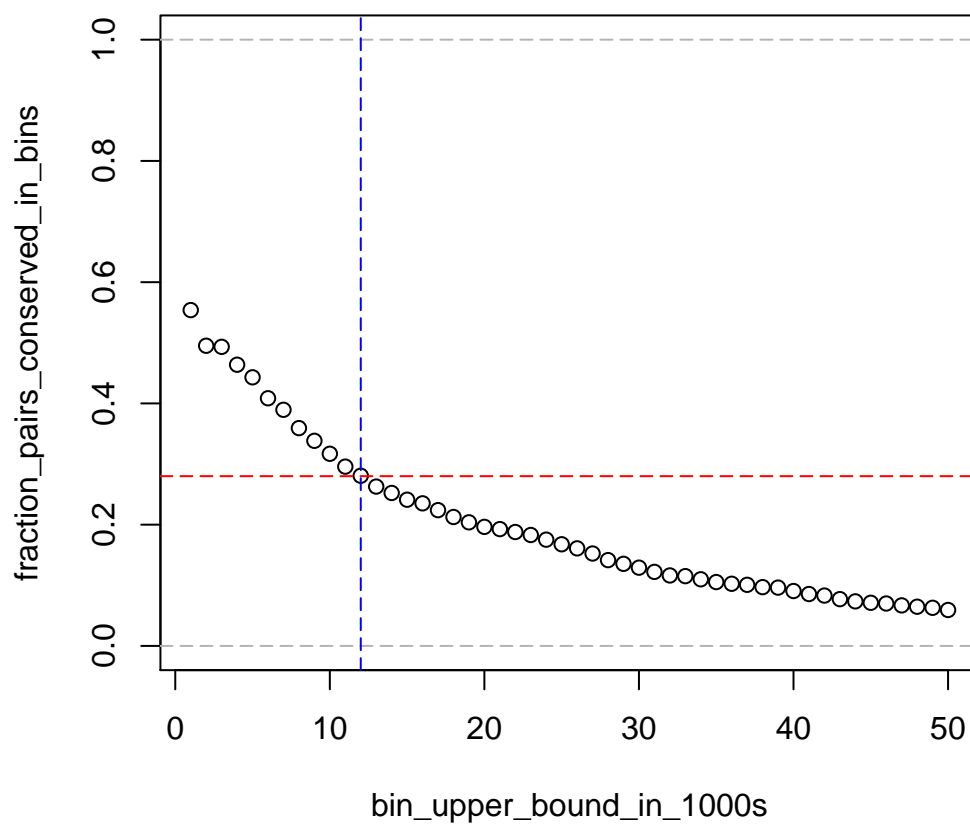

Supplement: s1 [file s1]

**Bin\_conservation\_minus\_bg\_Can0610SP\_vs\_CZ-2**  
**PD-0.465269**

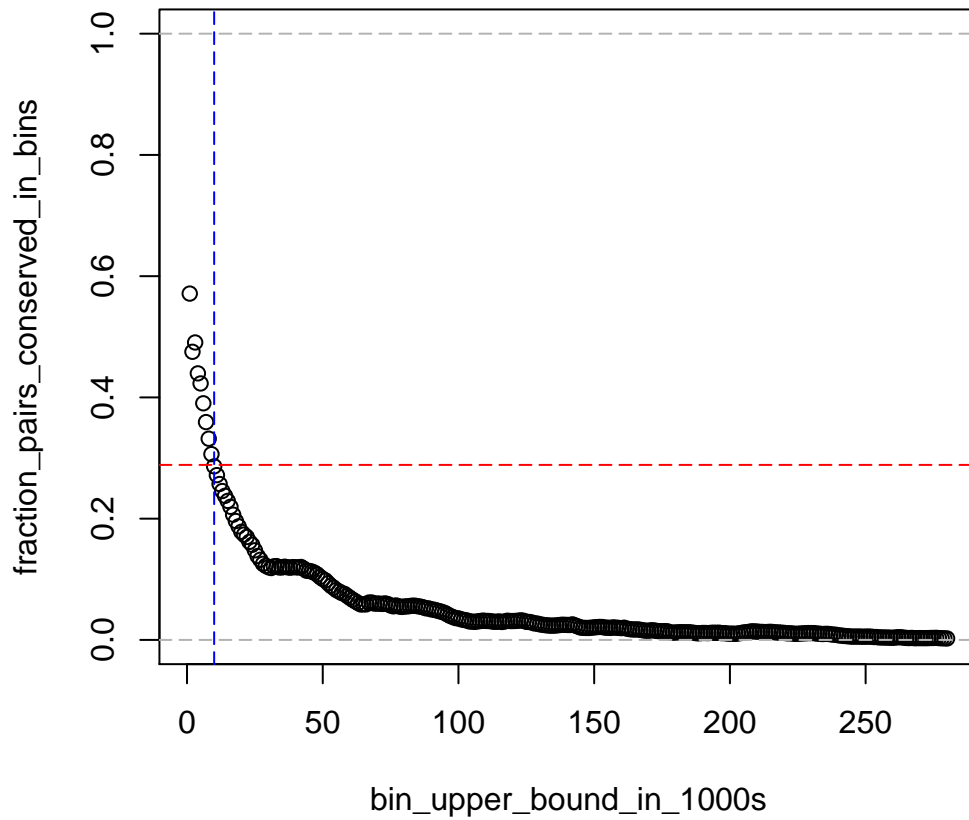

**Bin\_conservation\_minus\_bg\_Can0610SP\_vs\_CZ-2**  
**PD-0.465269**

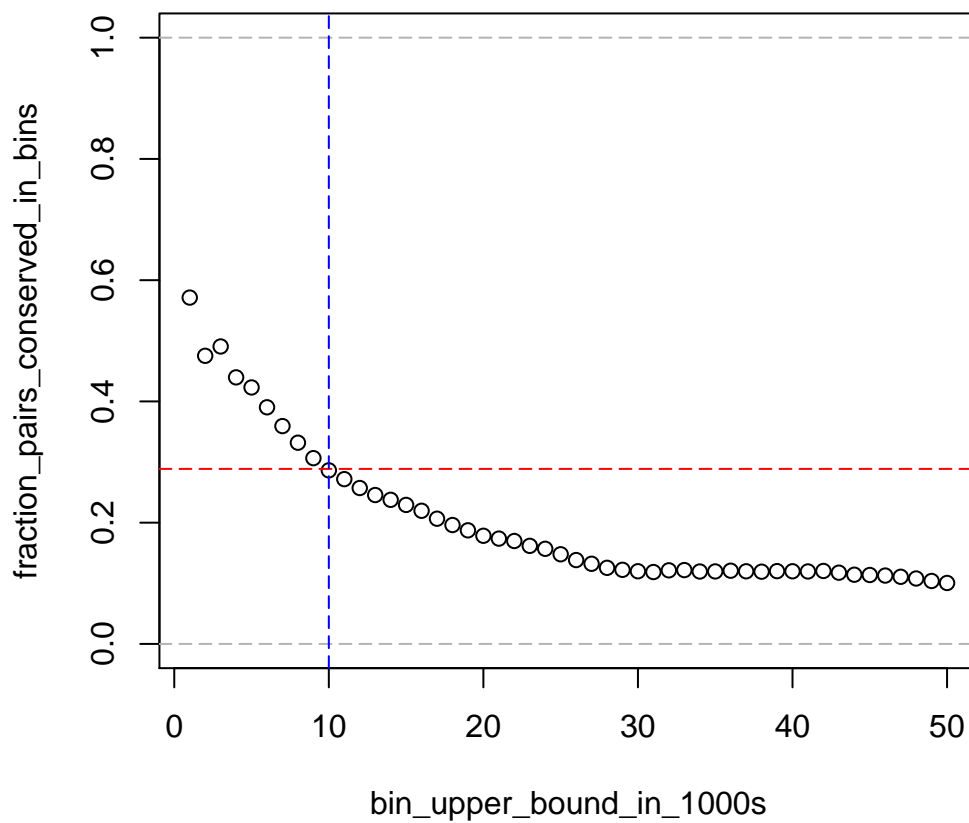

Supplement: s1 [file s1]

**Bin\_conservation\_minus\_bg\_AR158\_vs\_MN0810.1**  
**PD-0.703151**

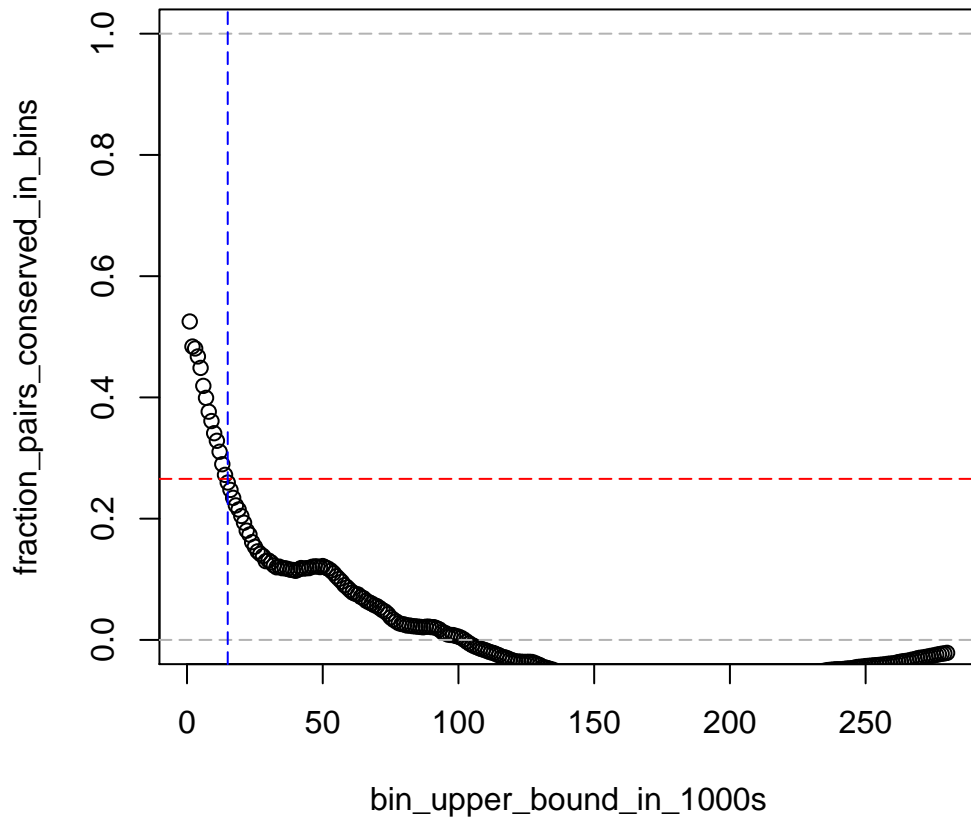

**Bin\_conservation\_minus\_bg\_AR158\_vs\_MN0810.1**  
**PD-0.703151**

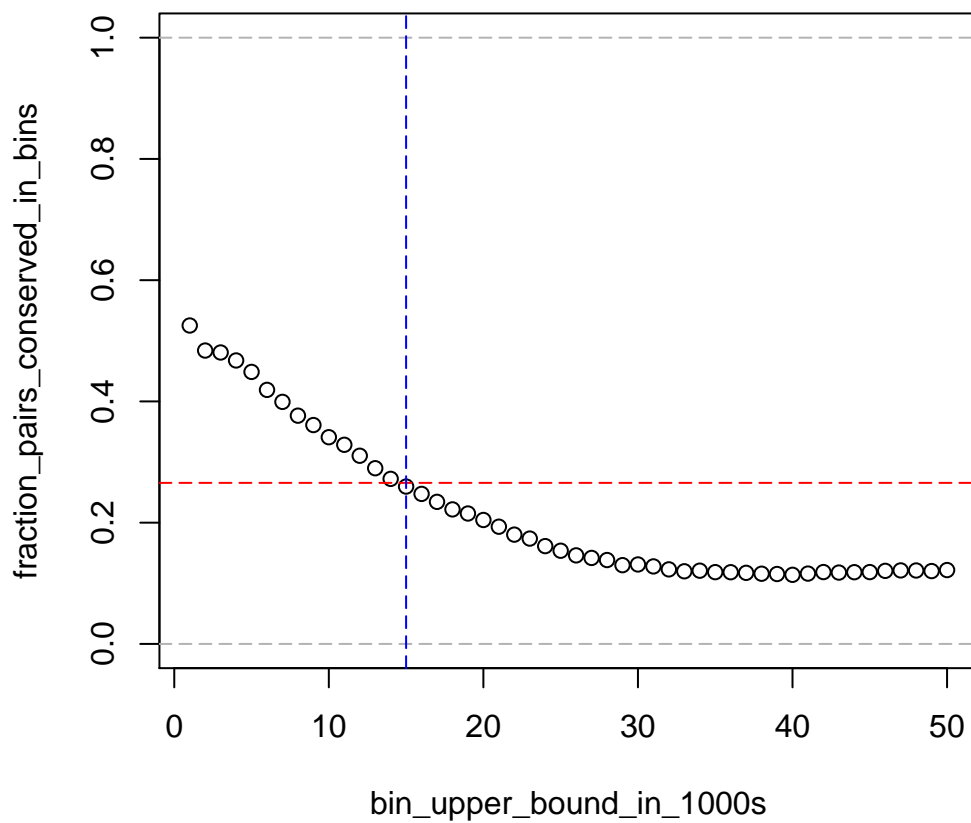

Supplement: s1 [file s1]

**Bin\_conservation\_minus\_bg\_FR483\_vs\_NE-JV-1**  
**PD-0.362505**

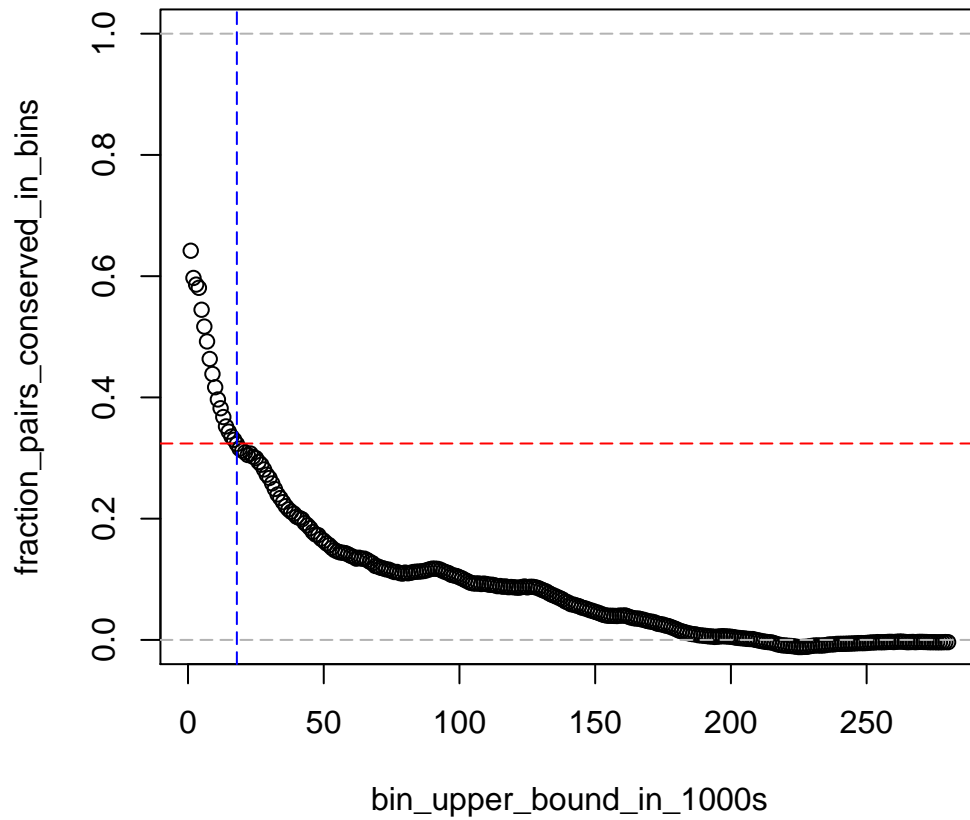

**Bin\_conservation\_minus\_bg\_FR483\_vs\_NE-JV-1**  
**PD-0.362505**

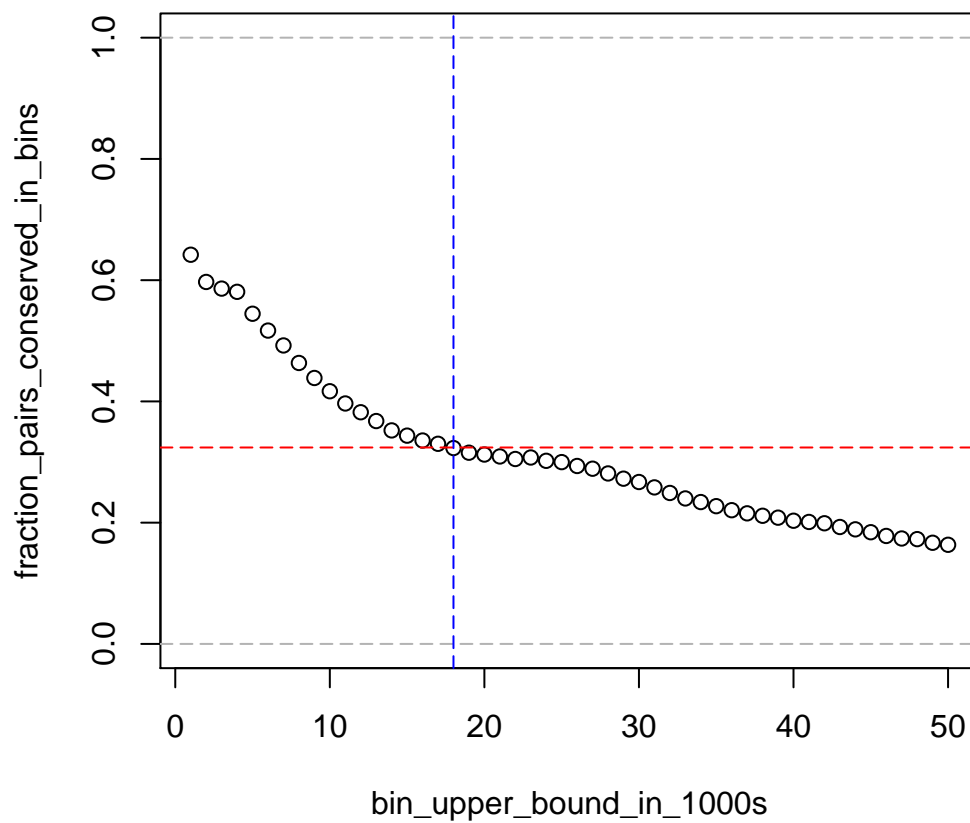

Supplement: s1 [file s1]

**Bin\_conservation\_minus\_bg\_NW665.2\_vs\_TN603.4.2**  
**PD-0.452884**

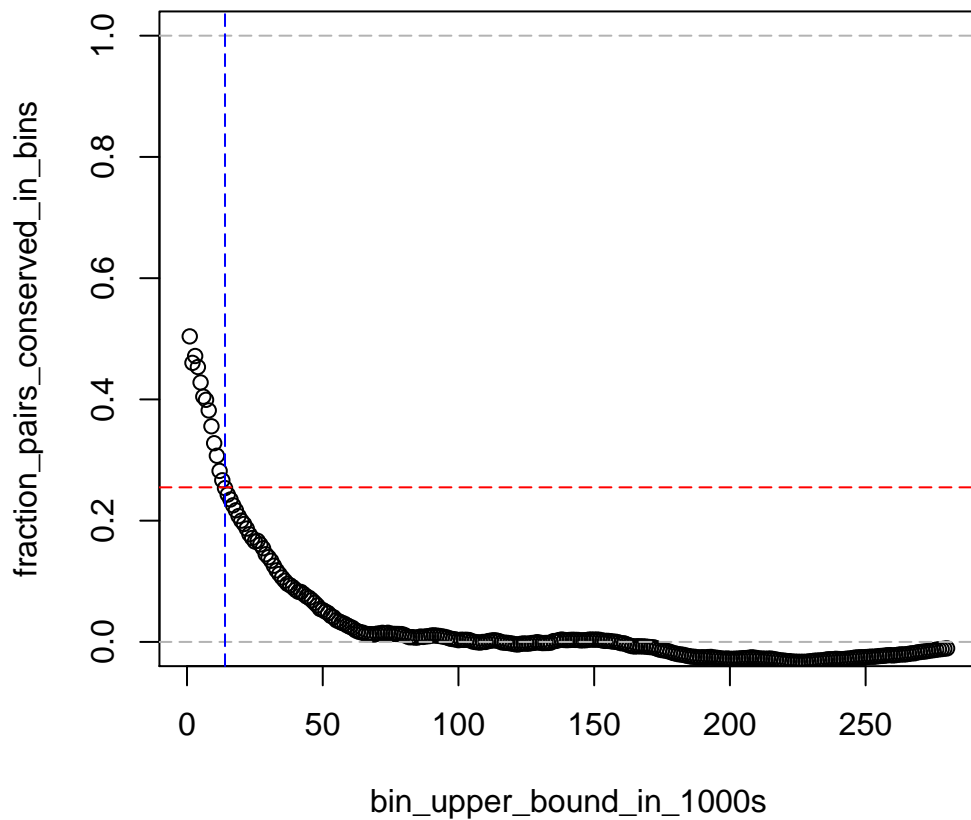

**Bin\_conservation\_minus\_bg\_NW665.2\_vs\_TN603.4.2**  
**PD-0.452884**

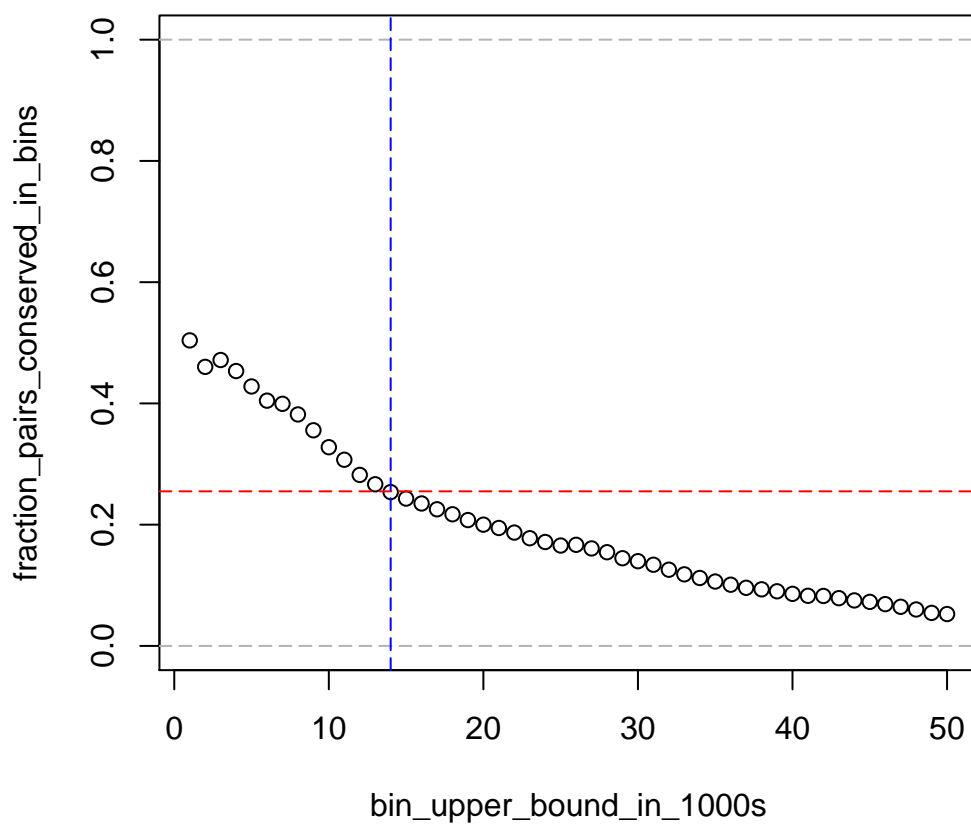

Supplement: s1 [file s1]

**Bin\_conservation\_minus\_bg\_AN69C\_vs\_CviKI**  
**PD-0.016516**

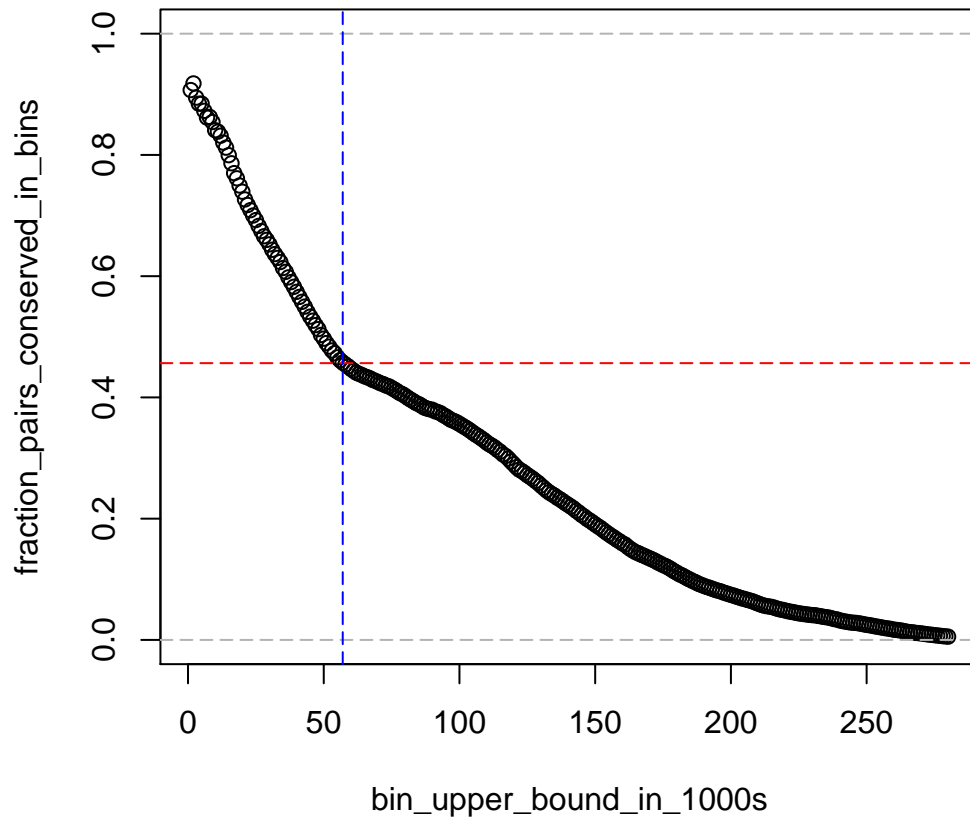

**Bin\_conservation\_minus\_bg\_AN69C\_vs\_CviKI**  
**PD-0.016516**

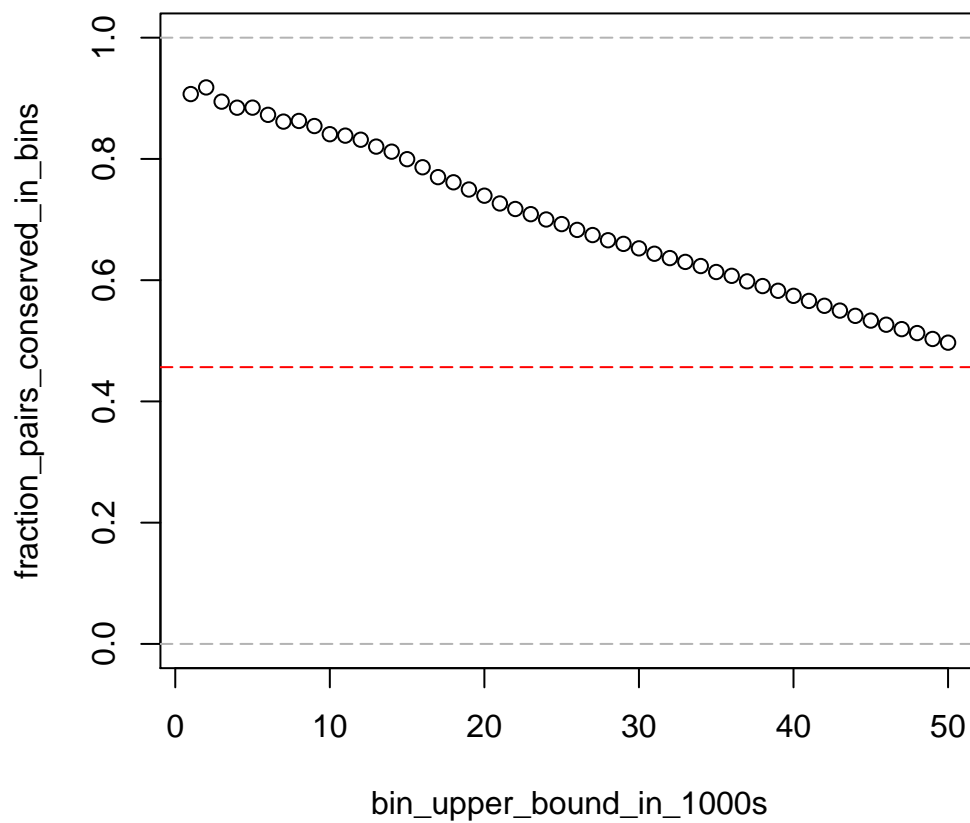

Supplement: s1 [file s1]

**Bin\_conservation\_minus\_bg\_CvsA1\_vs\_NYs-1**  
**PD-0.147959**

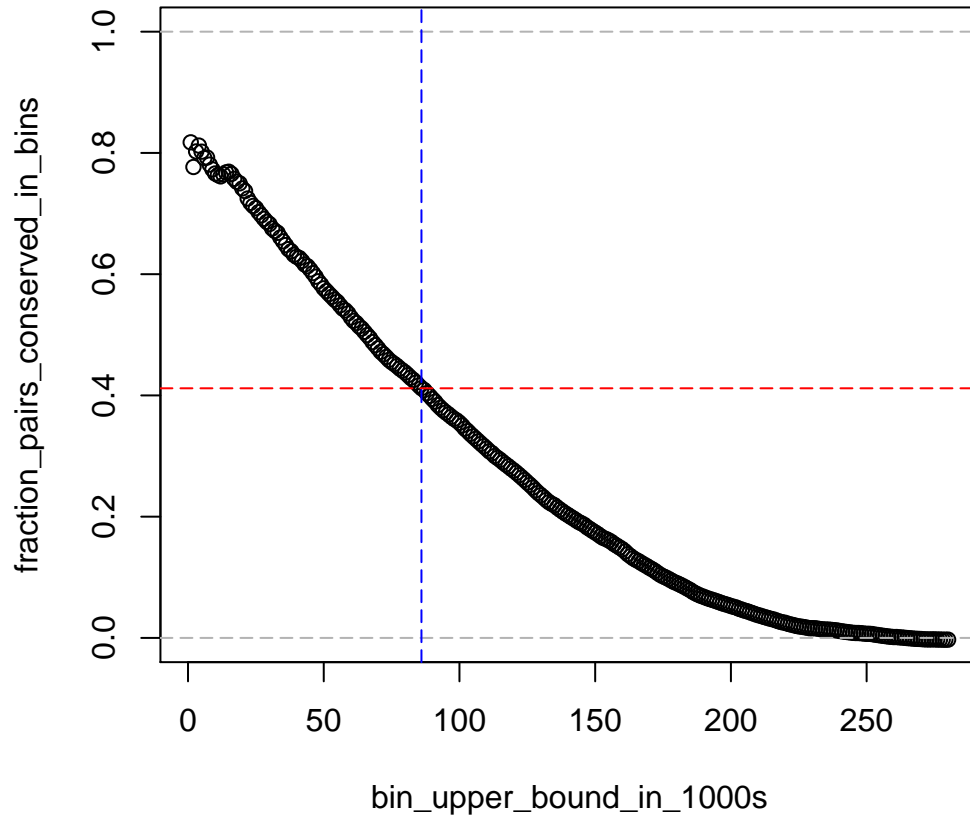

**Bin\_conservation\_minus\_bg\_CvsA1\_vs\_NYs-1**  
**PD-0.147959**

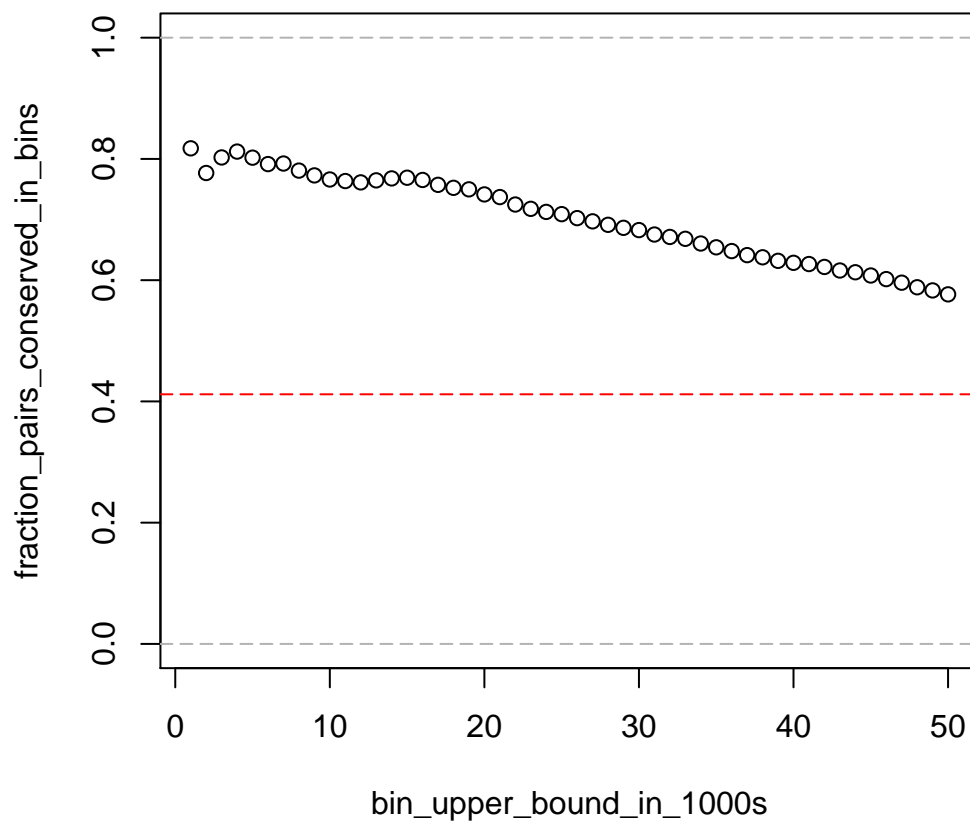

Supplement: s1 [file s1]

**Bin\_conservation\_minus\_bg\_CvsA1\_vs\_TN603.4.2**  
**PD-0.684282**

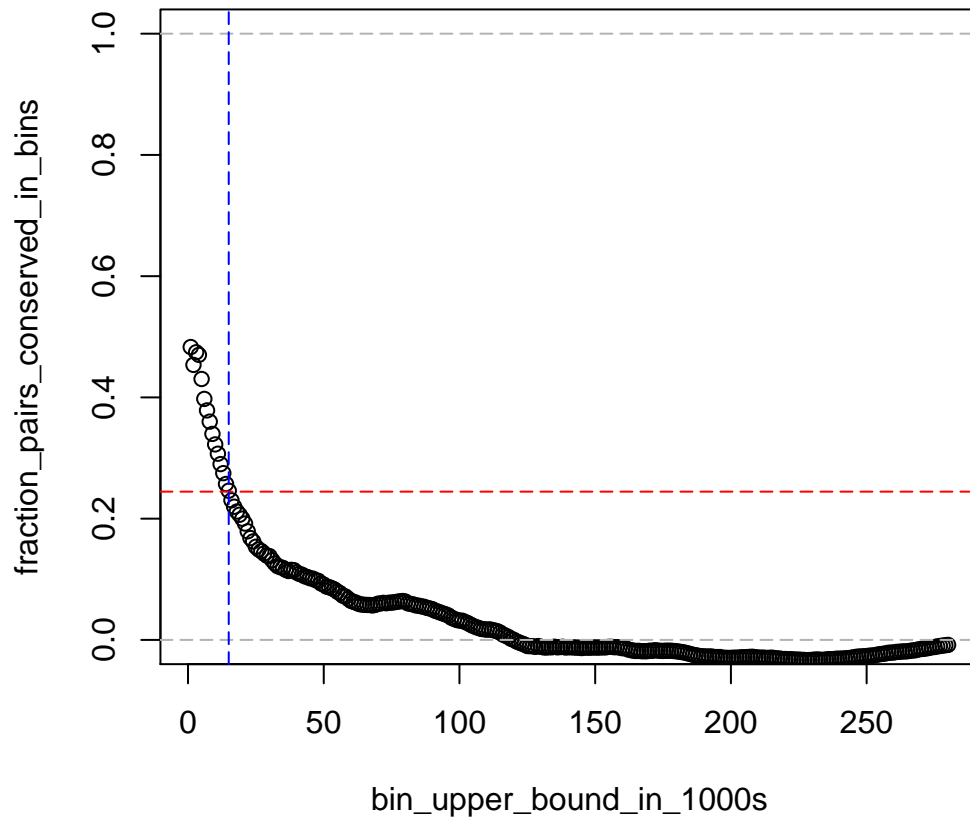

**Bin\_conservation\_minus\_bg\_CvsA1\_vs\_TN603.4.2**  
**PD-0.684282**

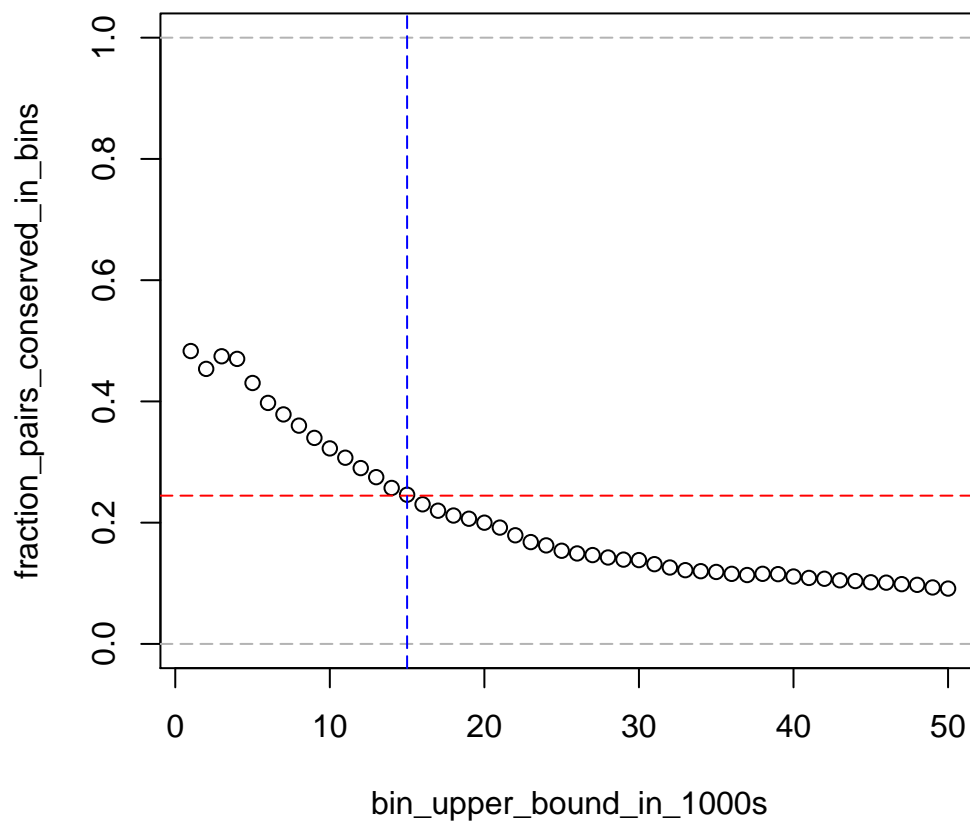

Supplement: s1 [file s1]

**Bin\_conservation\_minus\_bg\_CvsA1\_vs\_OR0704.2.2**  
**PD-0.65192**

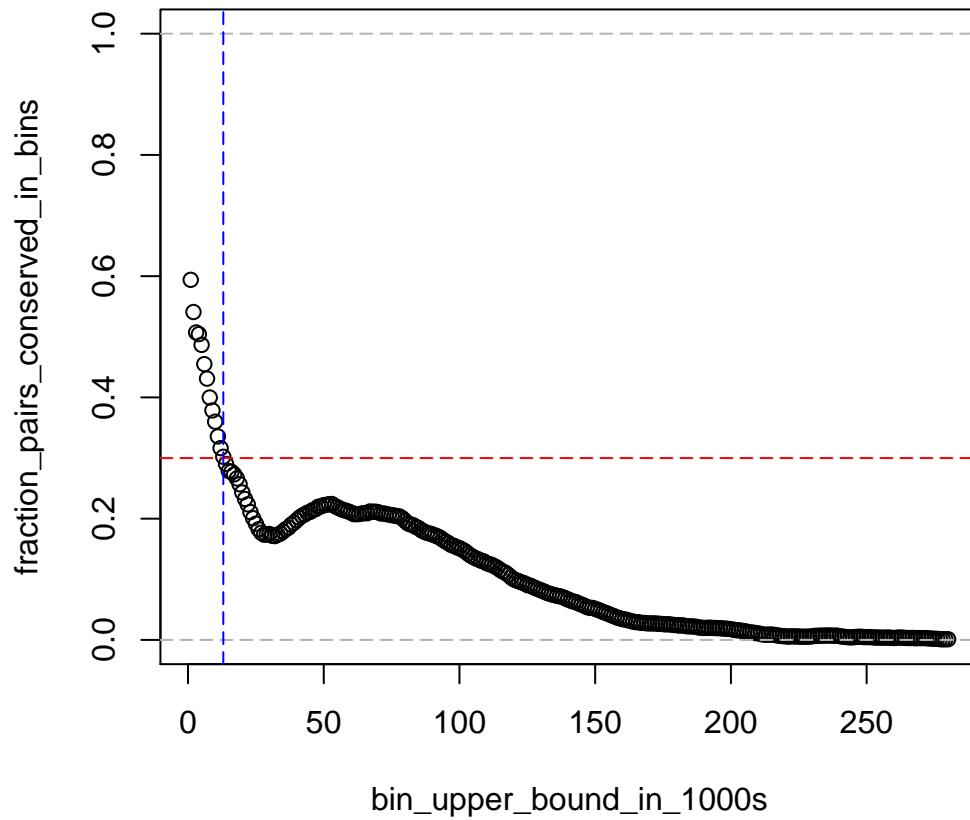

**Bin\_conservation\_minus\_bg\_CvsA1\_vs\_OR0704.2.2**  
**PD-0.65192**

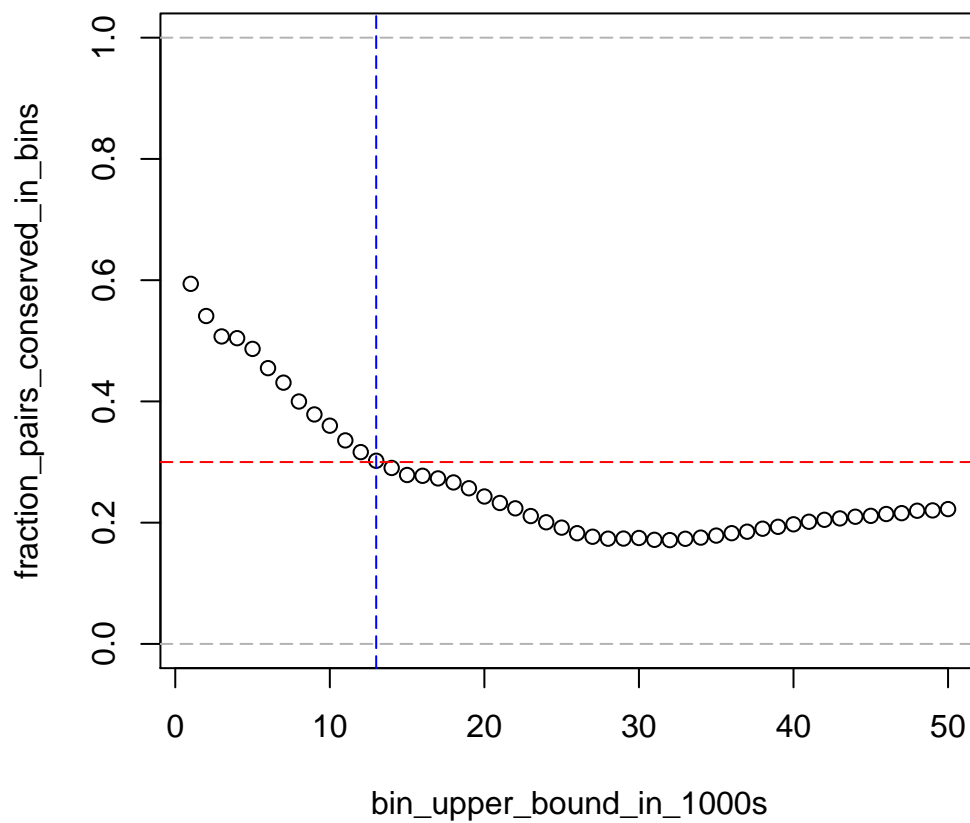

Supplement: s1 [file s1]

**Bin\_conservation\_minus\_bg\_Can0610SP\_vs\_OR0704.3**  
**PD-0.020086**

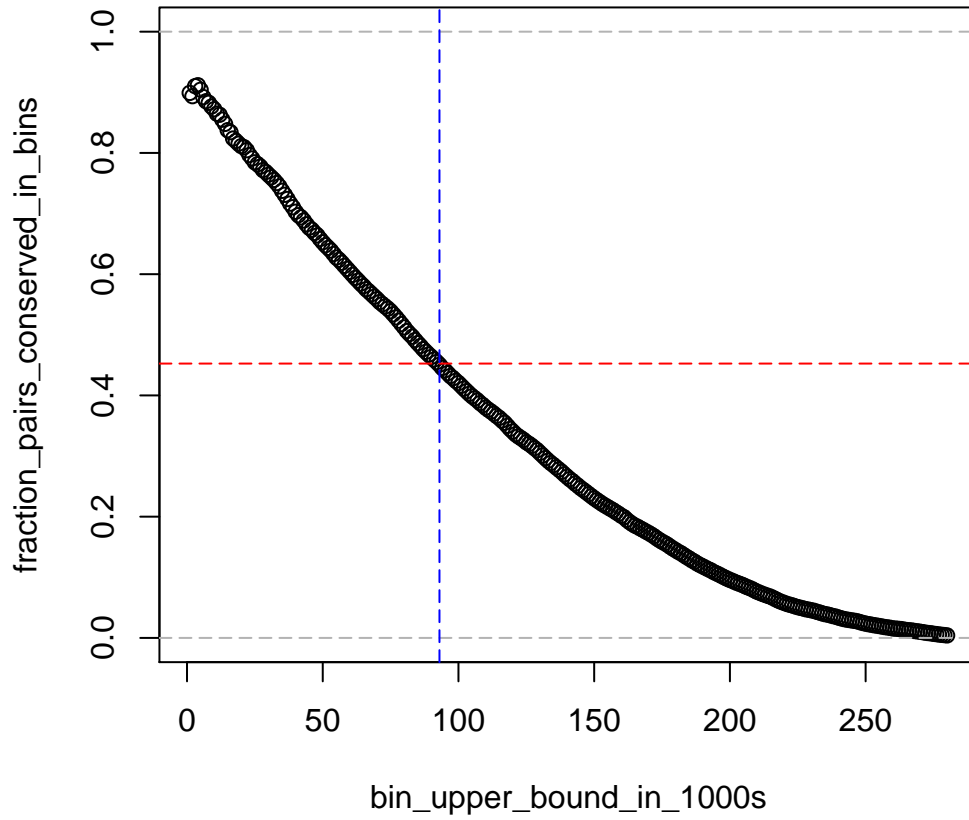

**Bin\_conservation\_minus\_bg\_Can0610SP\_vs\_OR0704.3**  
**PD-0.020086**

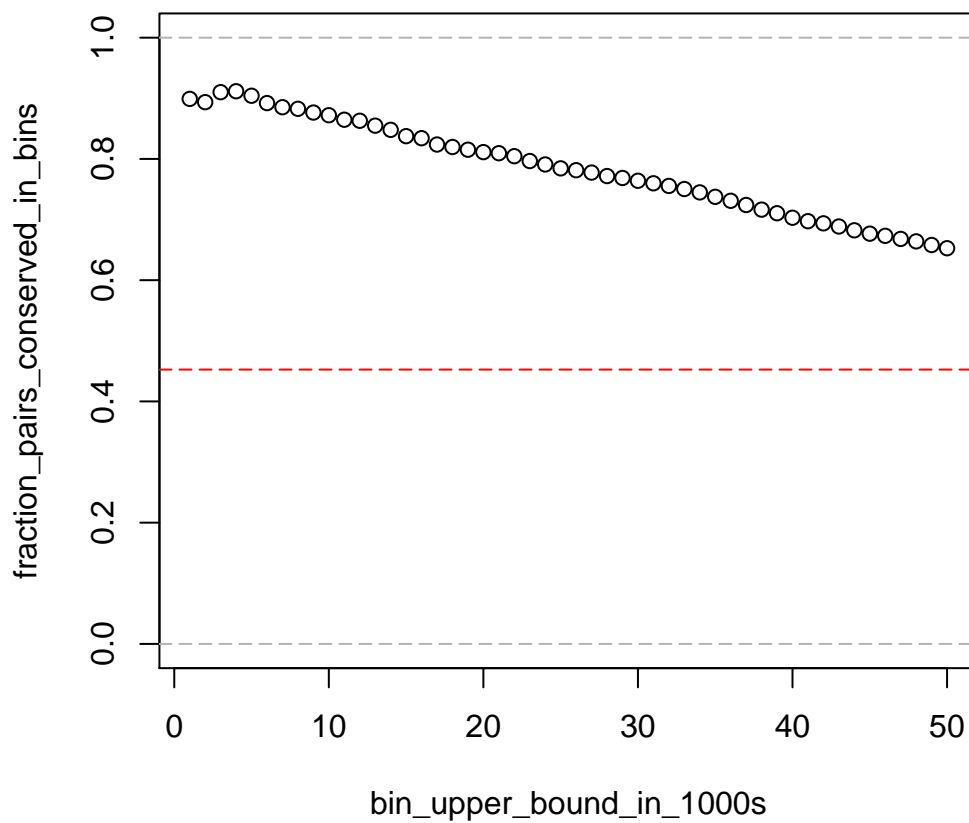

Supplement: s1 [file s1]

**Bin\_conservation\_minus\_bg\_CVB-1\_vs\_GM0701.1**  
**PD-0.465596**

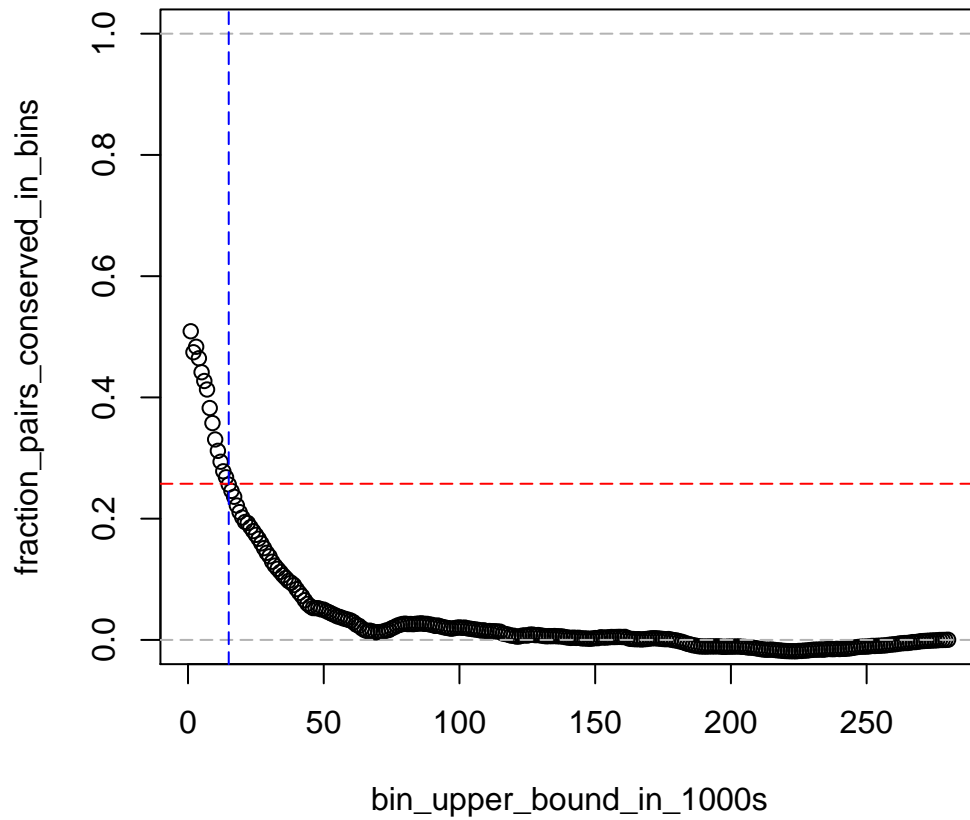

**Bin\_conservation\_minus\_bg\_CVB-1\_vs\_GM0701.1**  
**PD-0.465596**

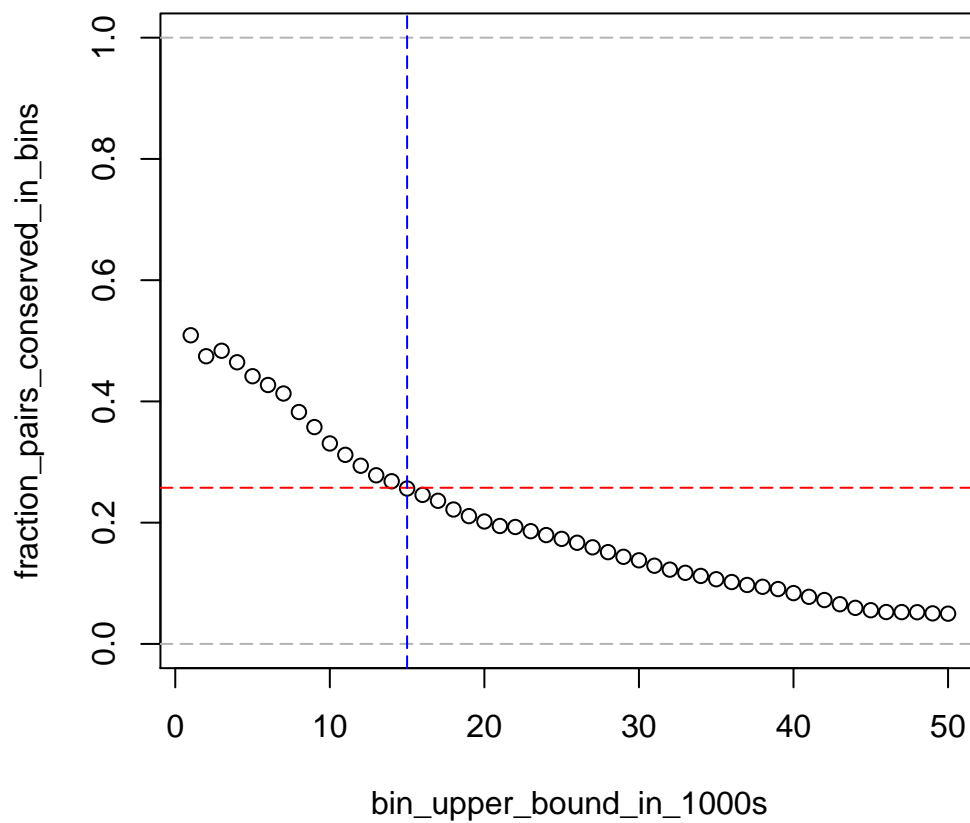

Supplement: s1 [file s1]

**Bin\_conservation\_minus\_bg\_KS1B\_vs\_PBCV1**  
**PD-0.029831**

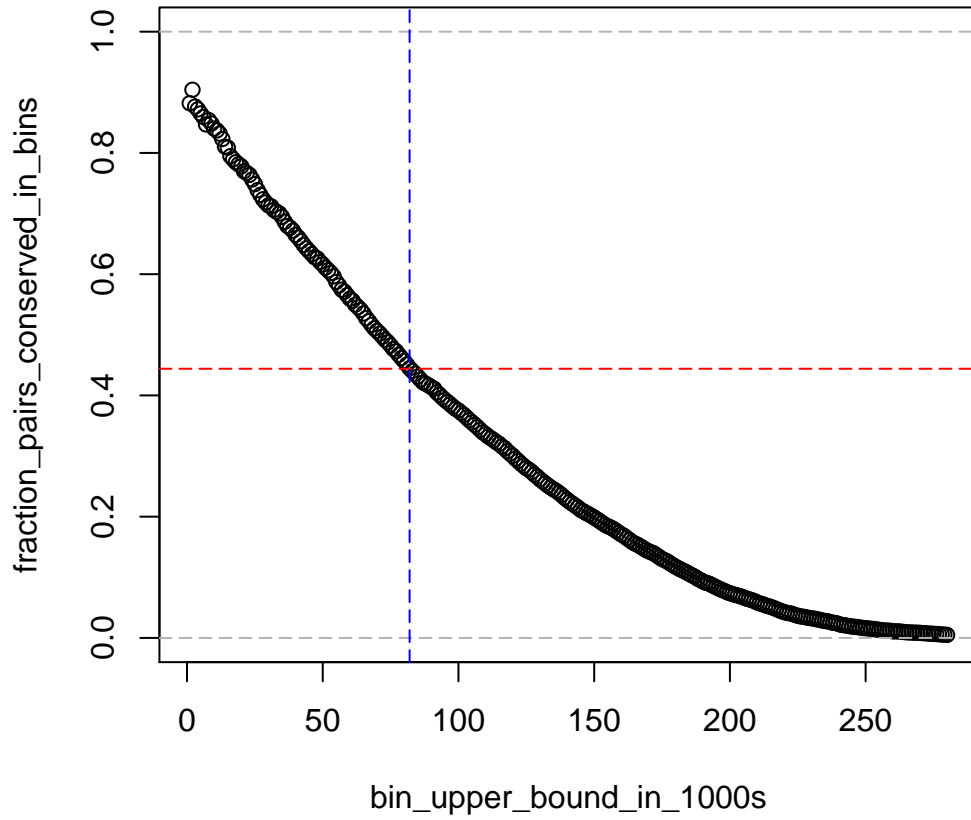

**Bin\_conservation\_minus\_bg\_KS1B\_vs\_PBCV1**  
**PD-0.029831**

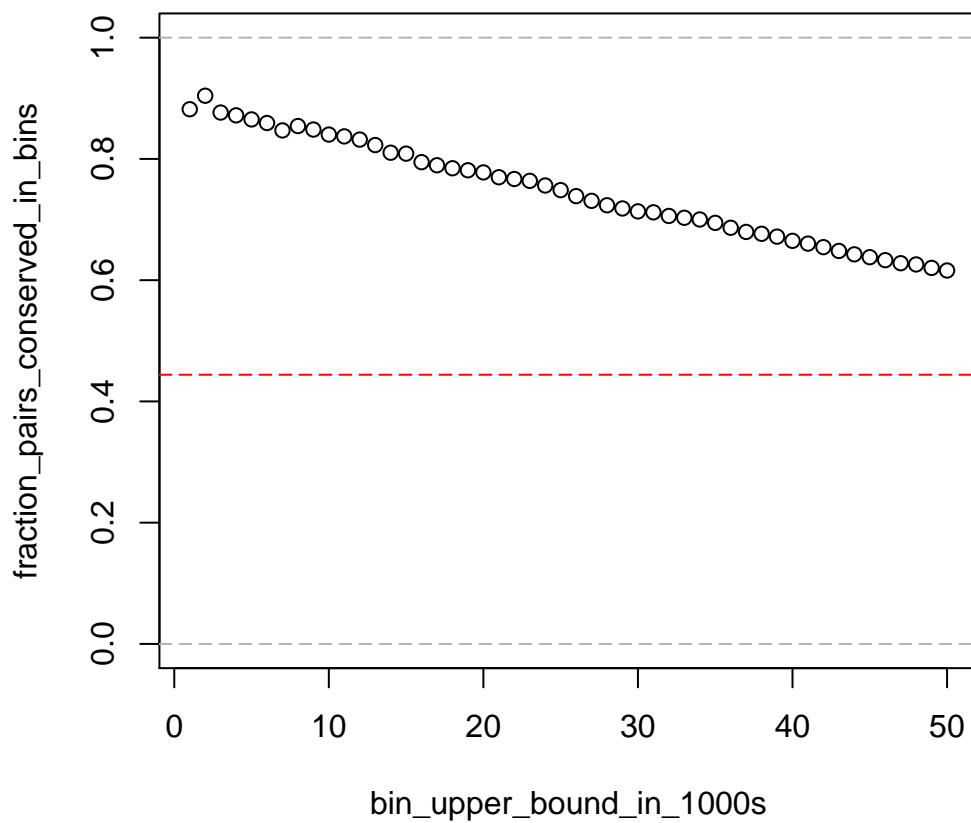

Supplement: s1 [file s1]

**Bin\_conservation\_minus\_bg\_Canal-1\_vs\_CVB-1**  
**PD-0.476489**

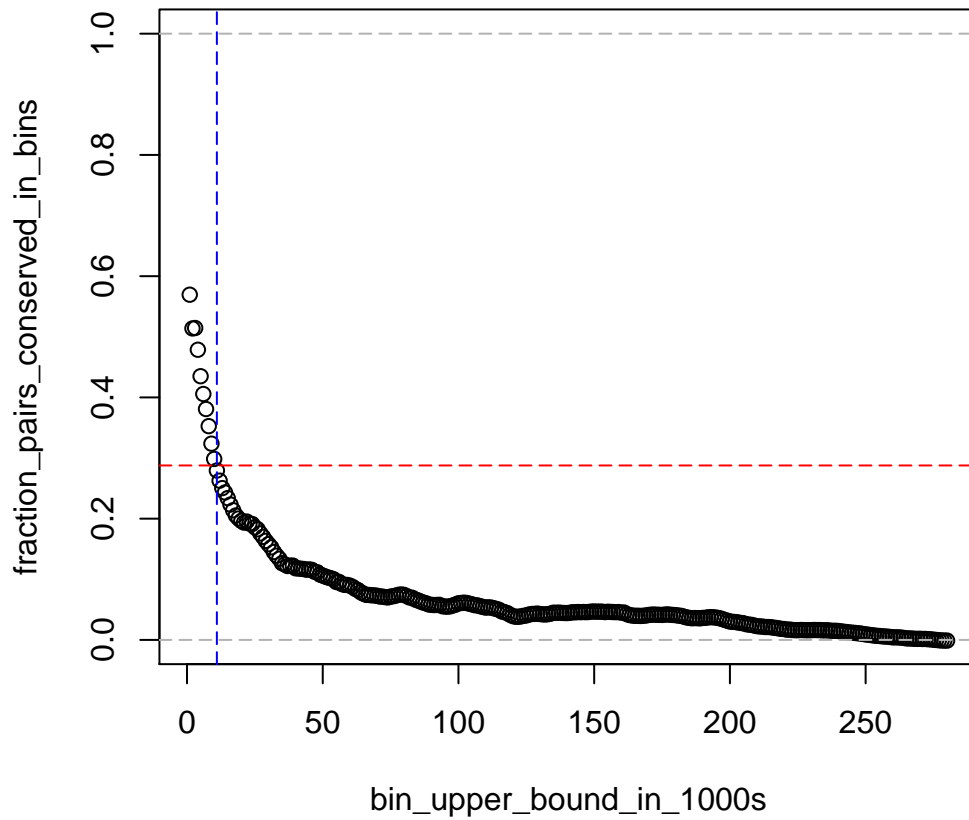

**Bin\_conservation\_minus\_bg\_Canal-1\_vs\_CVB-1**  
**PD-0.476489**

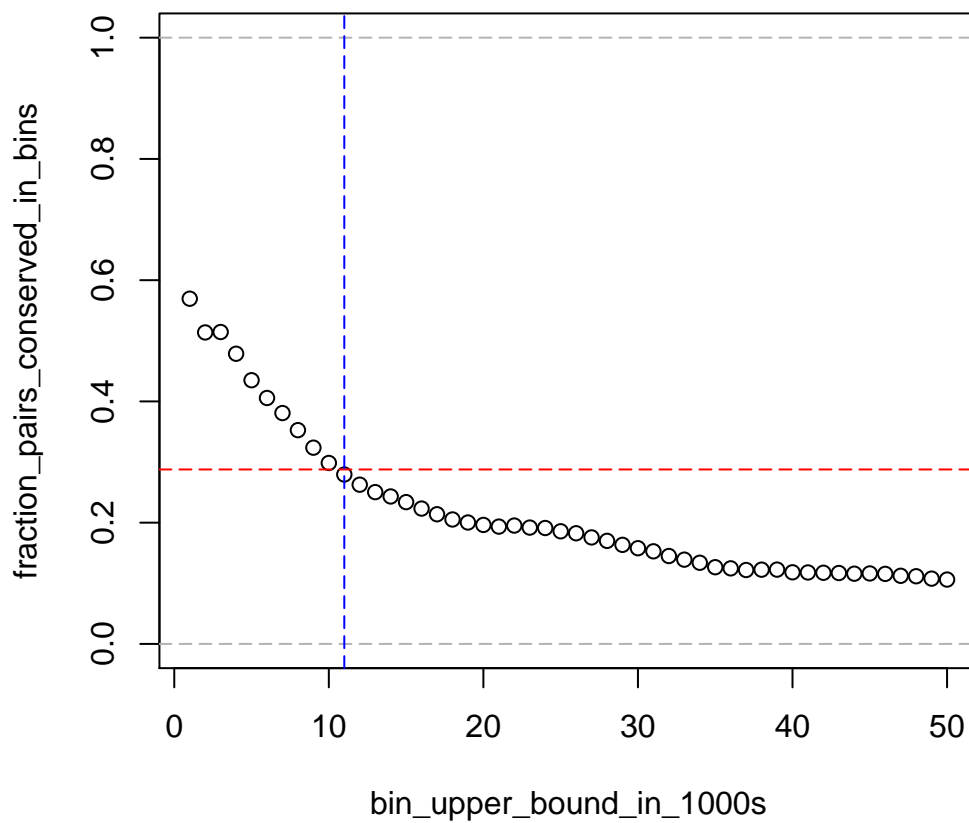

Supplement: s1 [file s1]

**Bin\_conservation\_minus\_bg\_Canal-1\_vs\_IL-5-2s1**  
**PD-0.703974**

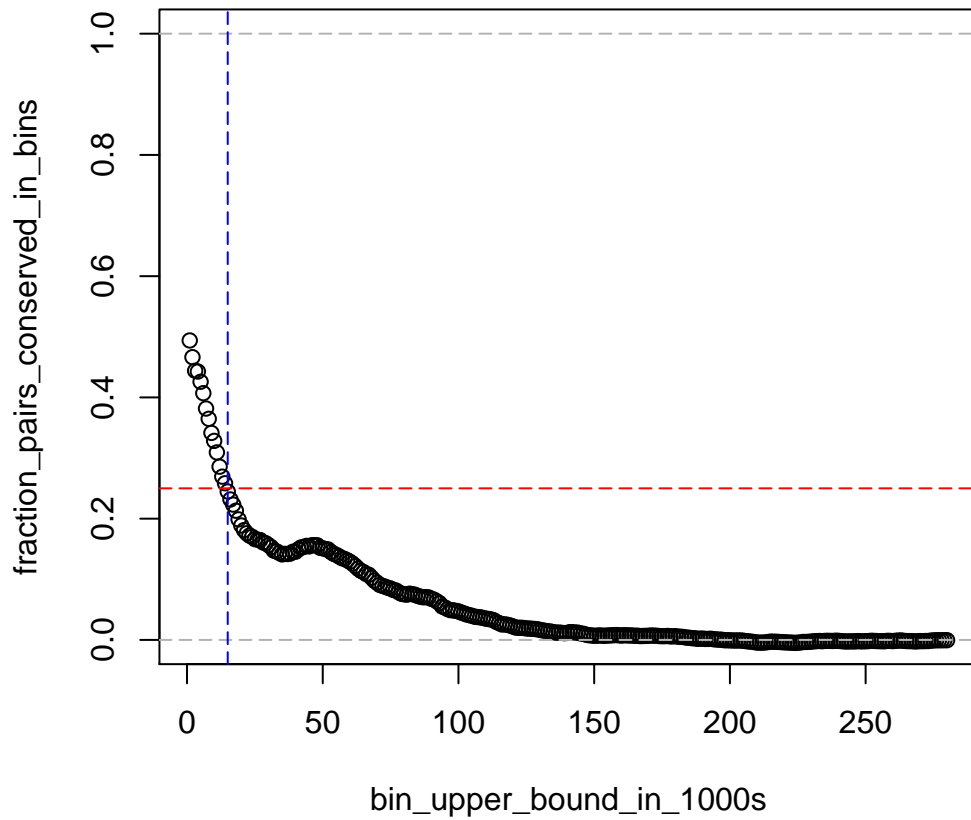

**Bin\_conservation\_minus\_bg\_Canal-1\_vs\_IL-5-2s1**  
**PD-0.703974**

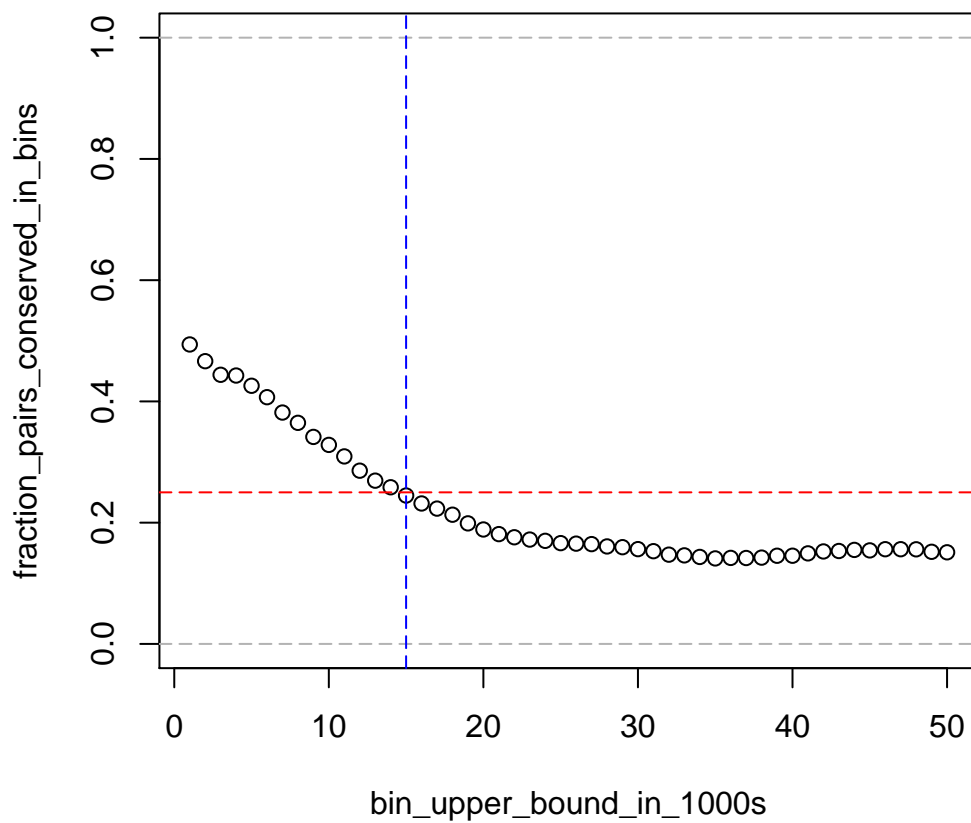

Supplement: s1 [file s1]

**Bin\_conservation\_minus\_bg\_CviKI\_vs\_CVR-1**  
**PD-0.649086**

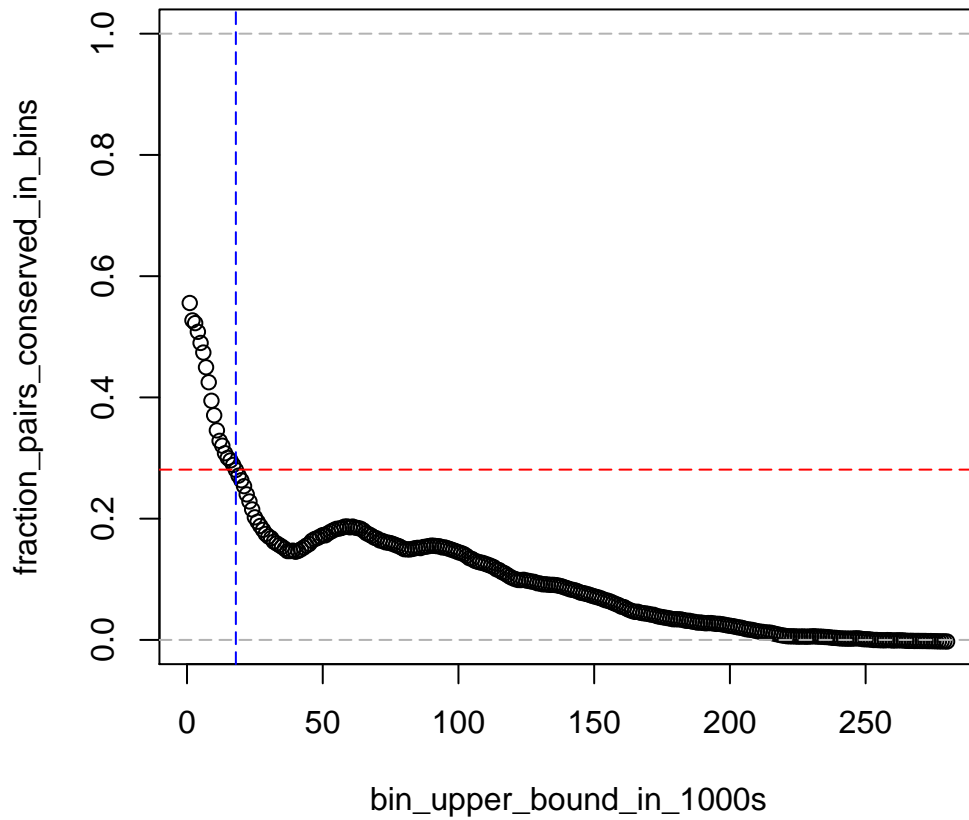

**Bin\_conservation\_minus\_bg\_CviKI\_vs\_CVR-1**  
**PD-0.649086**

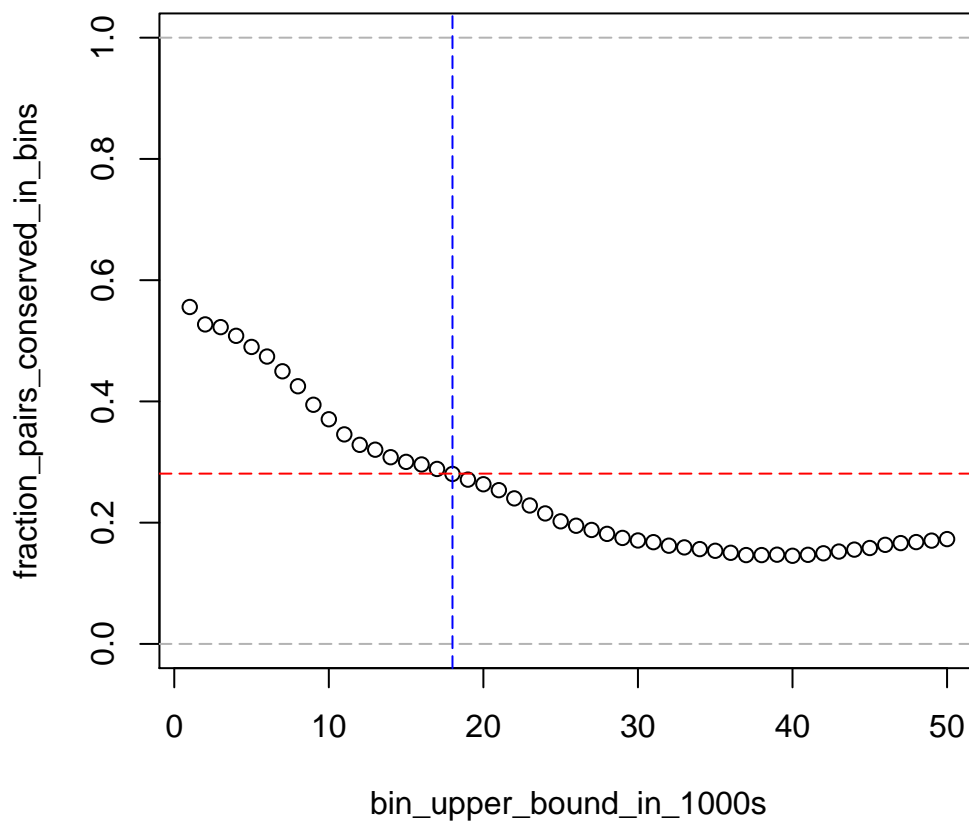

Supplement: s1 [file s1]

**Bin\_conservation\_minus\_bg\_Canal-1\_vs\_OR0704.3**  
**PD-0.1141**

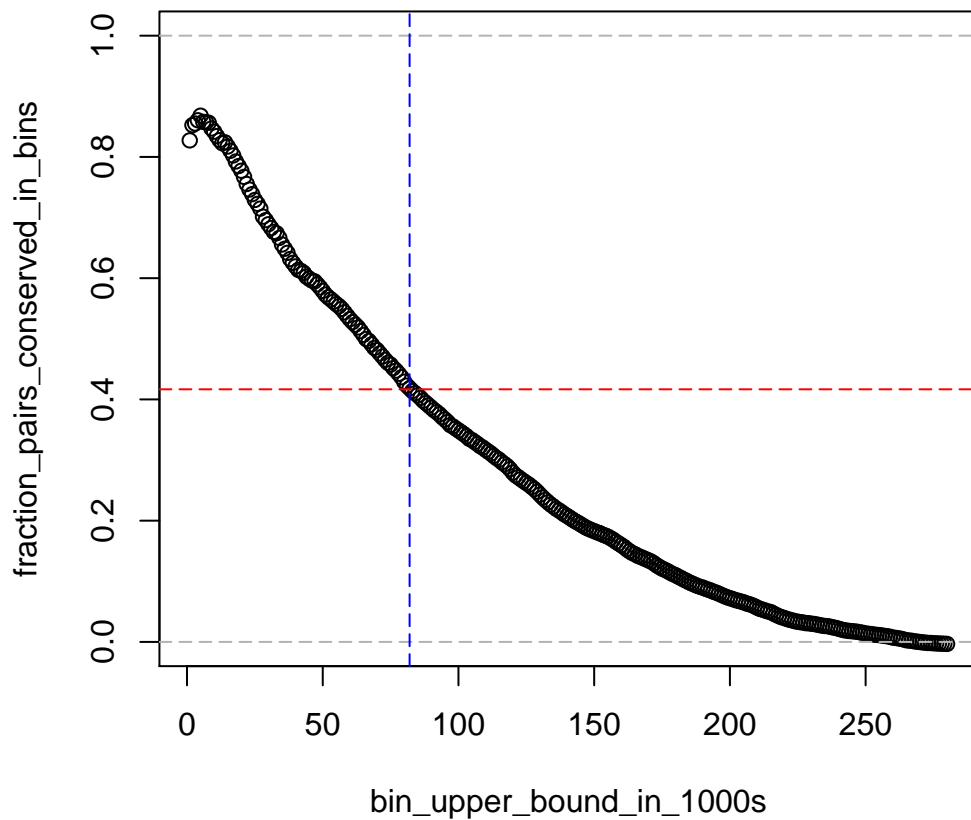

**Bin\_conservation\_minus\_bg\_Canal-1\_vs\_OR0704.3**  
**PD-0.1141**

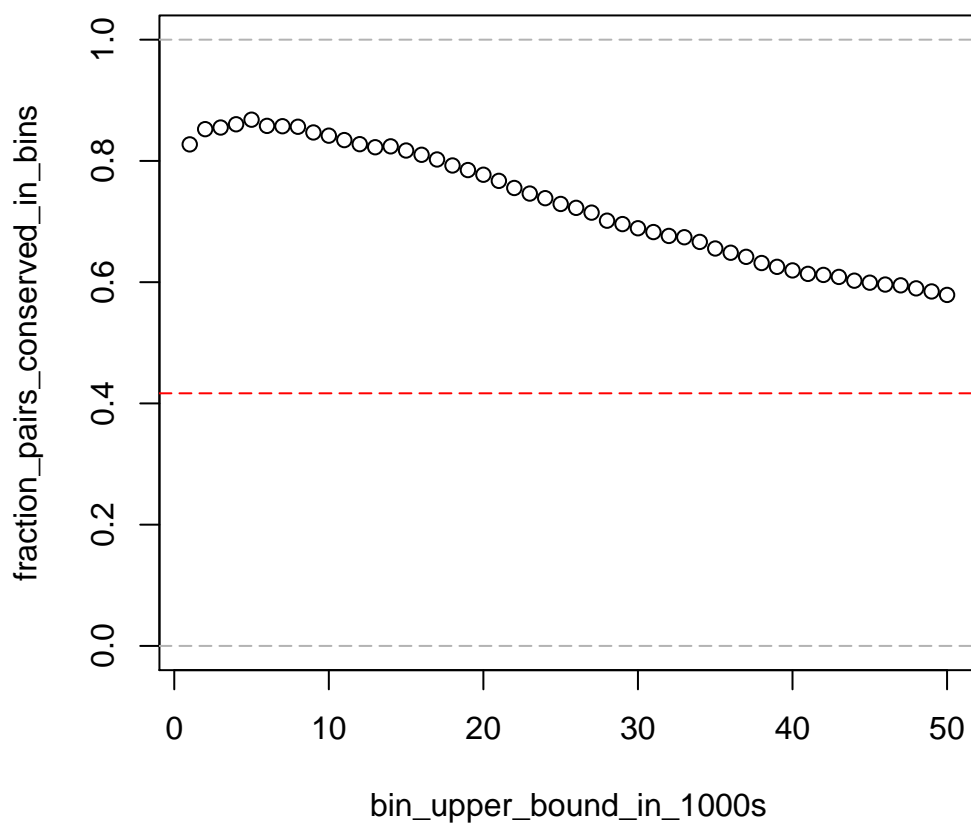

Supplement: s1 [file s1]

**Bin\_conservation\_minus\_bg\_GM0701.1\_vs\_NE-JV-1**  
**PD-0.483599**

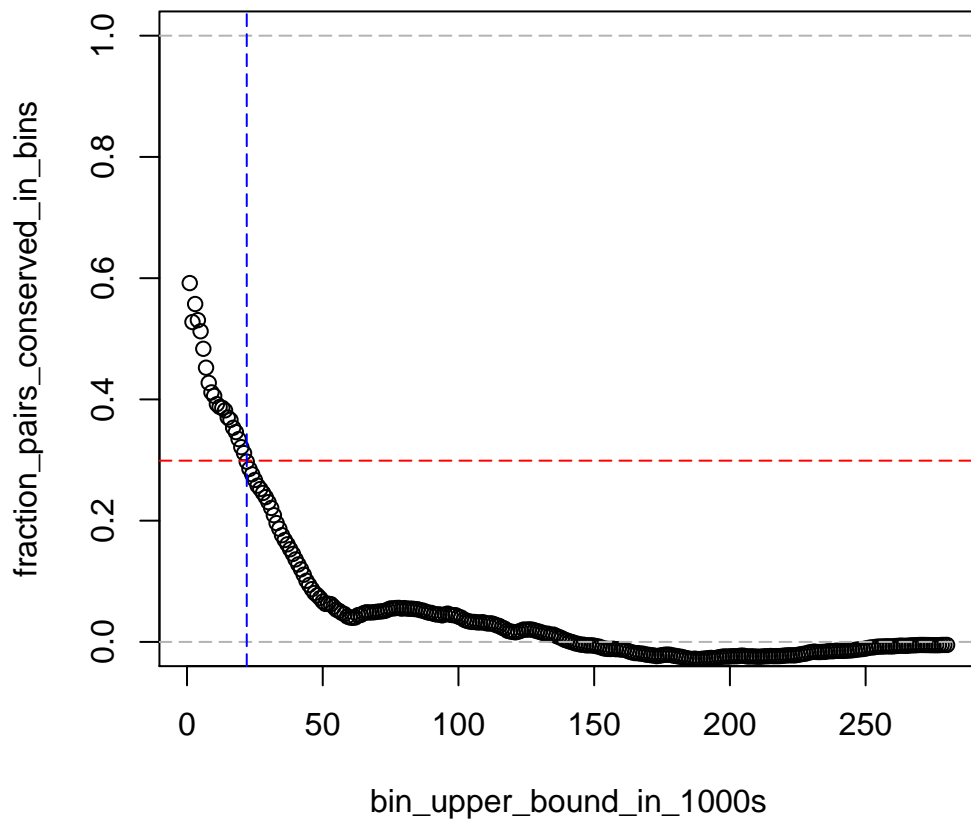

**Bin\_conservation\_minus\_bg\_GM0701.1\_vs\_NE-JV-1**  
**PD-0.483599**

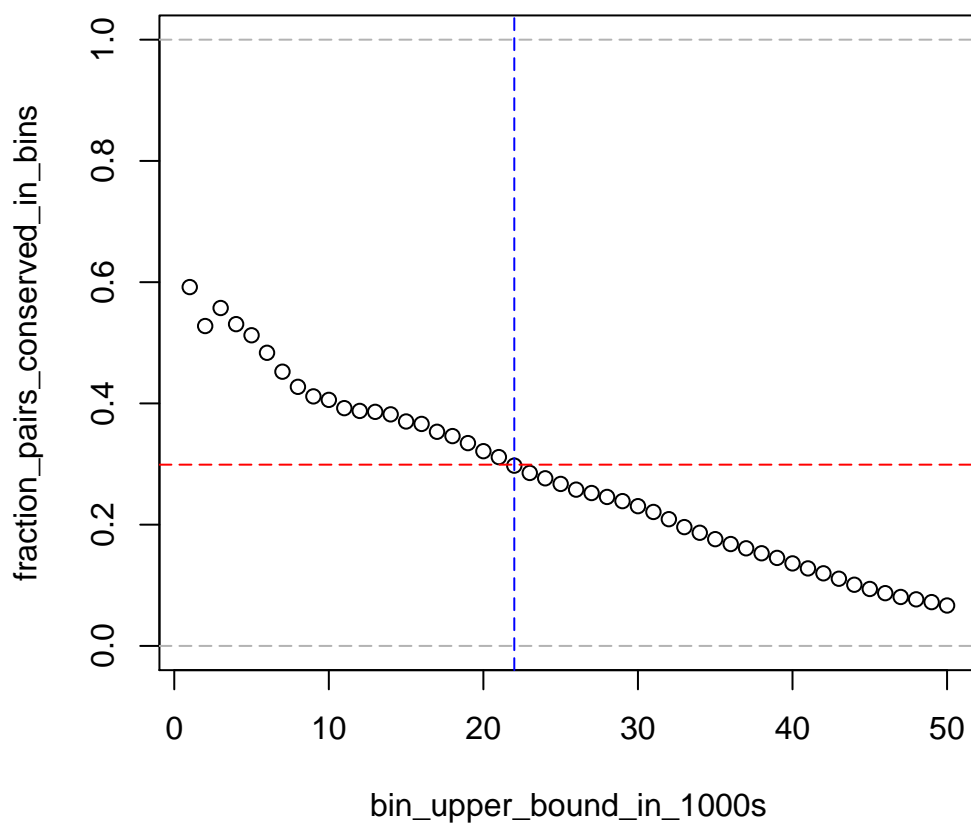

Supplement: s1 [file s1]

**Bin\_conservation\_minus\_bg\_CvsA1\_vs\_NW665.2**  
**PD-0.65576**

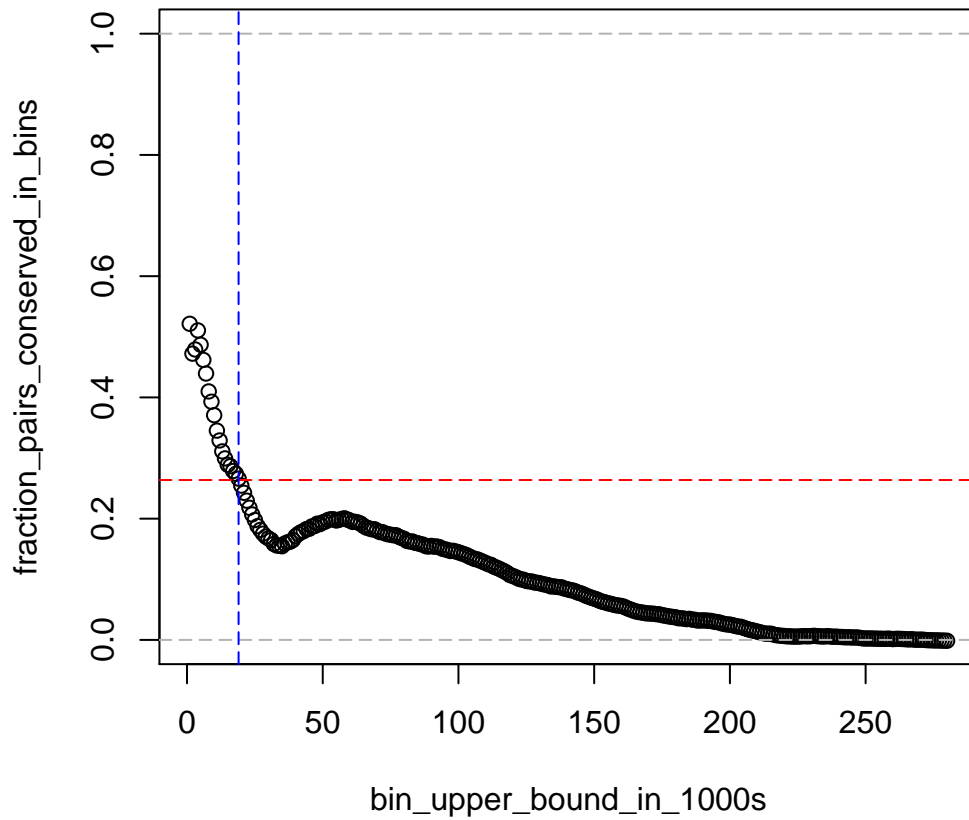

**Bin\_conservation\_minus\_bg\_CvsA1\_vs\_NW665.2**  
**PD-0.65576**

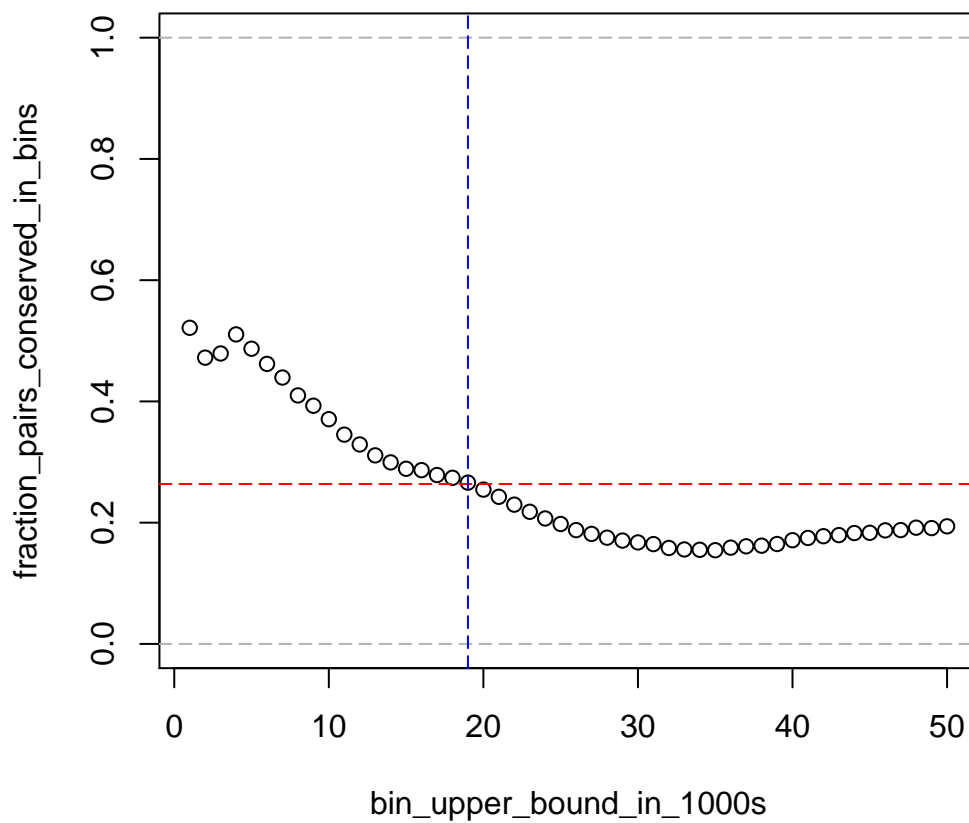

Supplement: s1 [file s1]

**Bin\_conservation\_minus\_bg\_CVG-1\_vs\_NE-JV-1**  
**PD-0.35926**

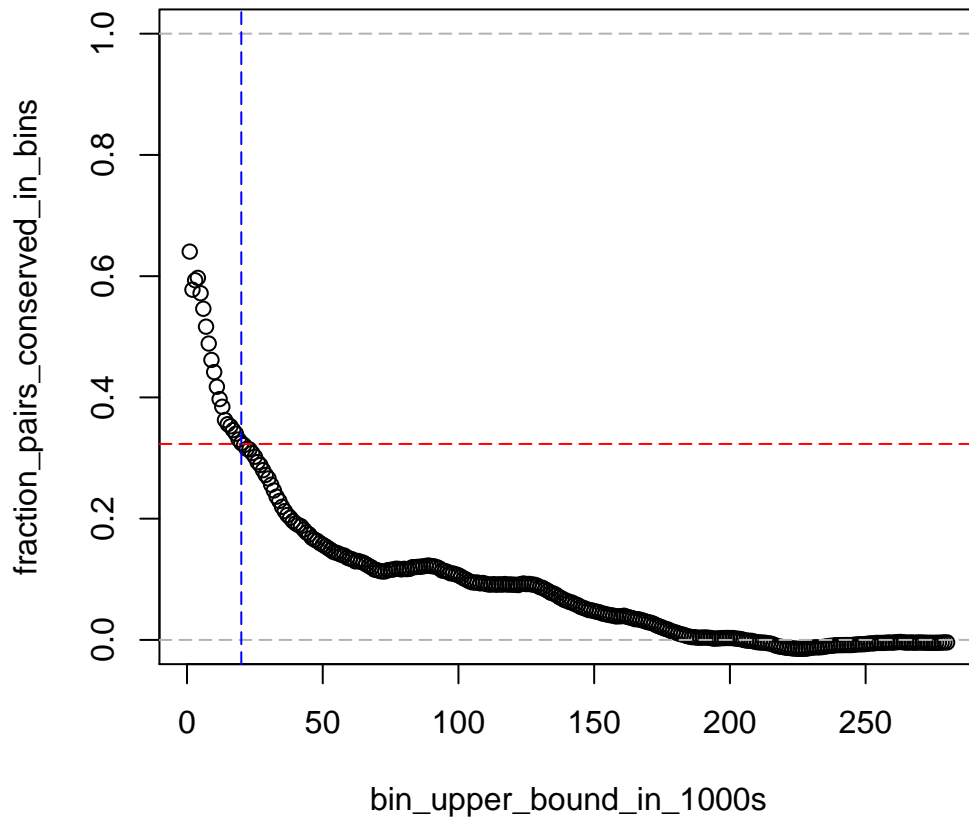

**Bin\_conservation\_minus\_bg\_CVG-1\_vs\_NE-JV-1**  
**PD-0.35926**

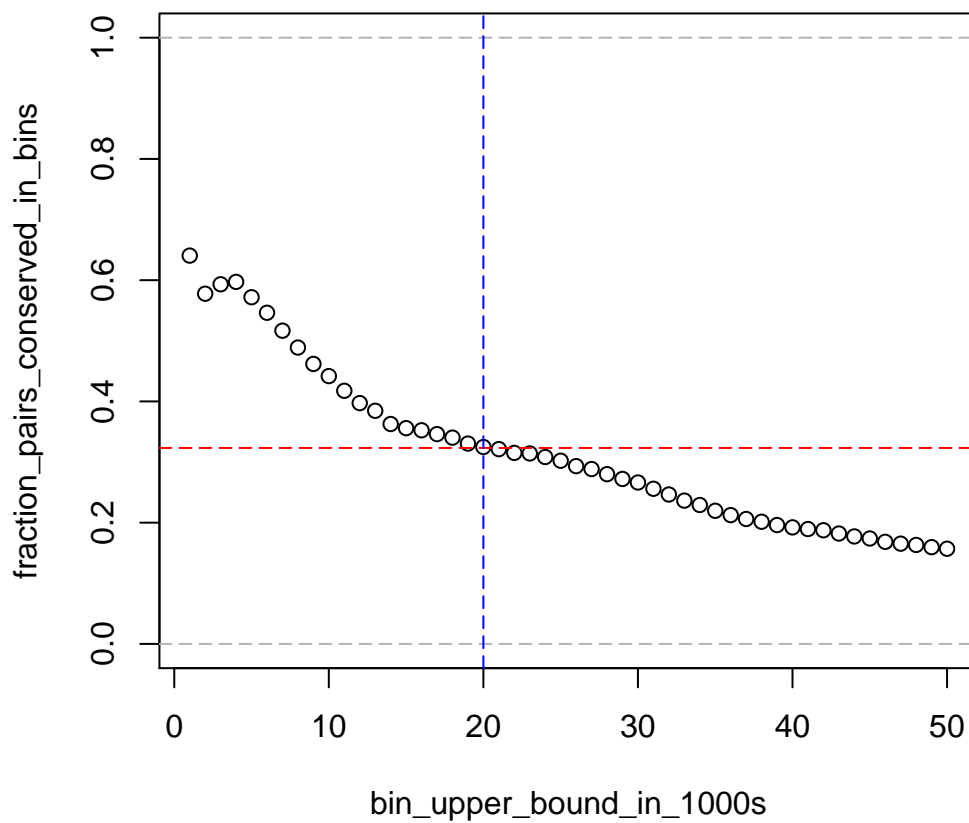

Supplement: s1 [file s1]

**Bin\_conservation\_minus\_bg\_MN0810.1\_vs\_WI0606**  
**PD-0.114999**

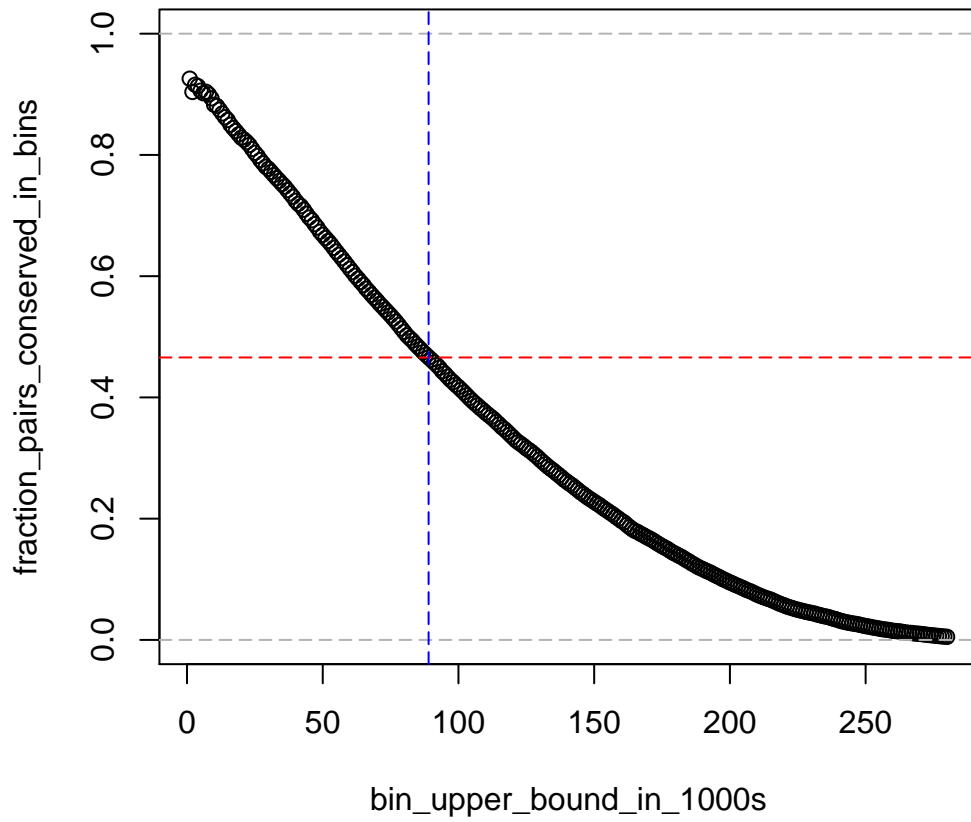

**Bin\_conservation\_minus\_bg\_MN0810.1\_vs\_WI0606**  
**PD-0.114999**

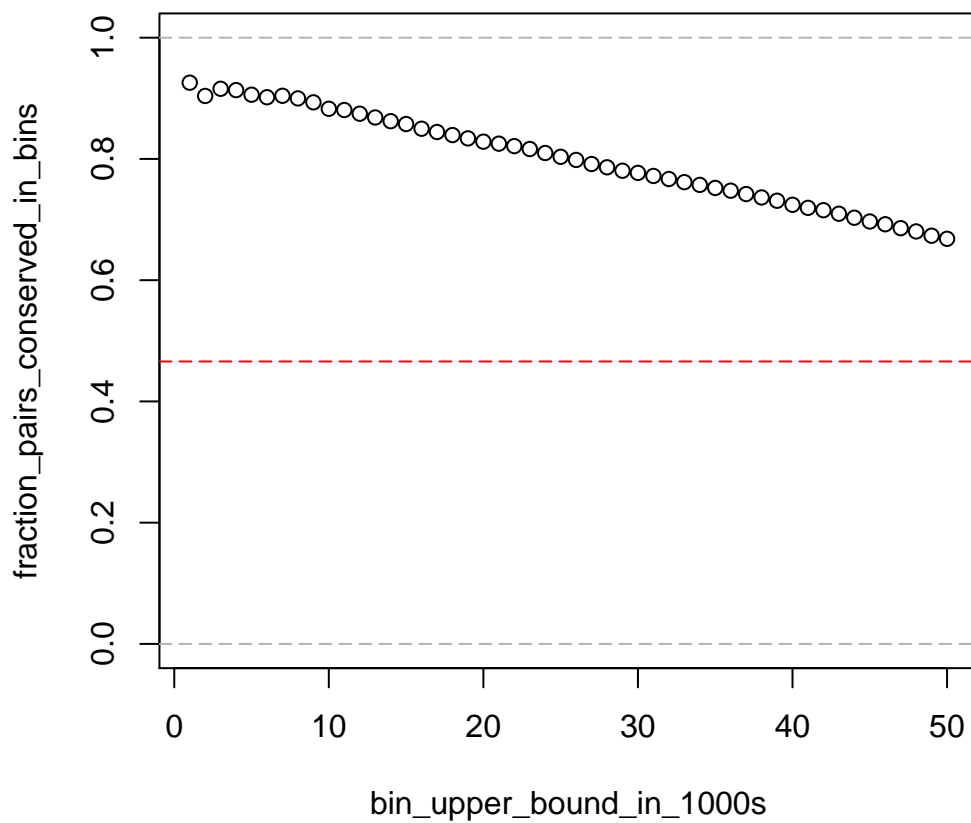

Supplement: s1 [file s1]

**Bin\_conservation\_minus\_bg\_CviKI\_vs\_Fr5L**  
**PD-0.650695**

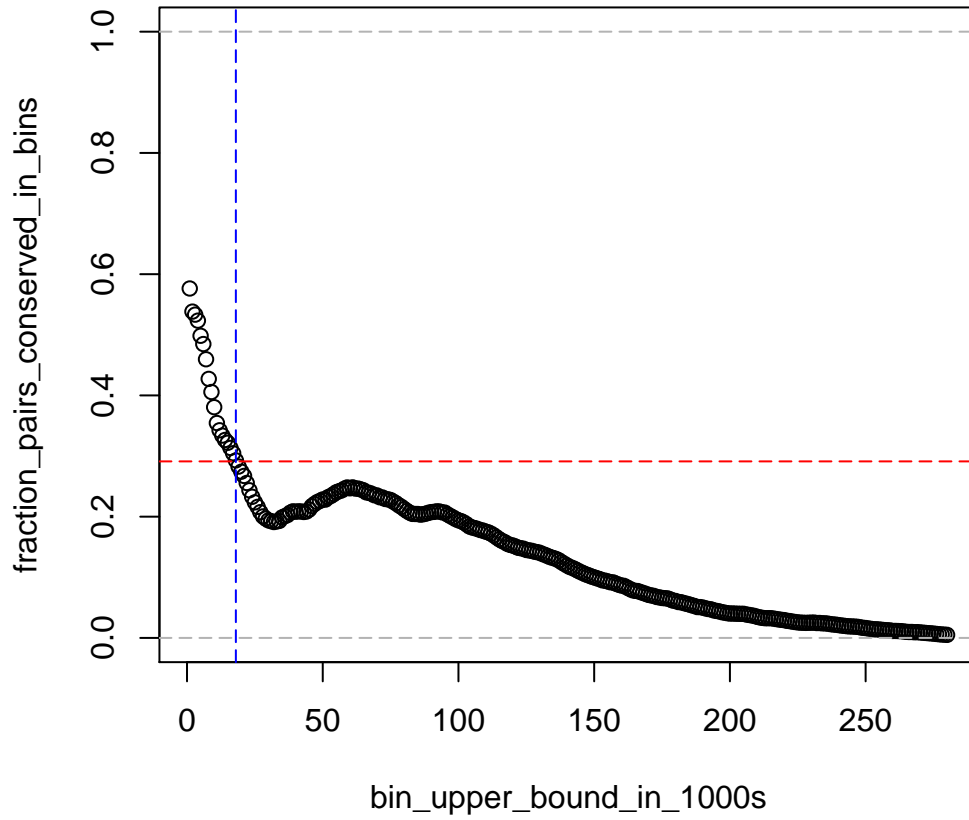

**Bin\_conservation\_minus\_bg\_CviKI\_vs\_Fr5L**  
**PD-0.650695**

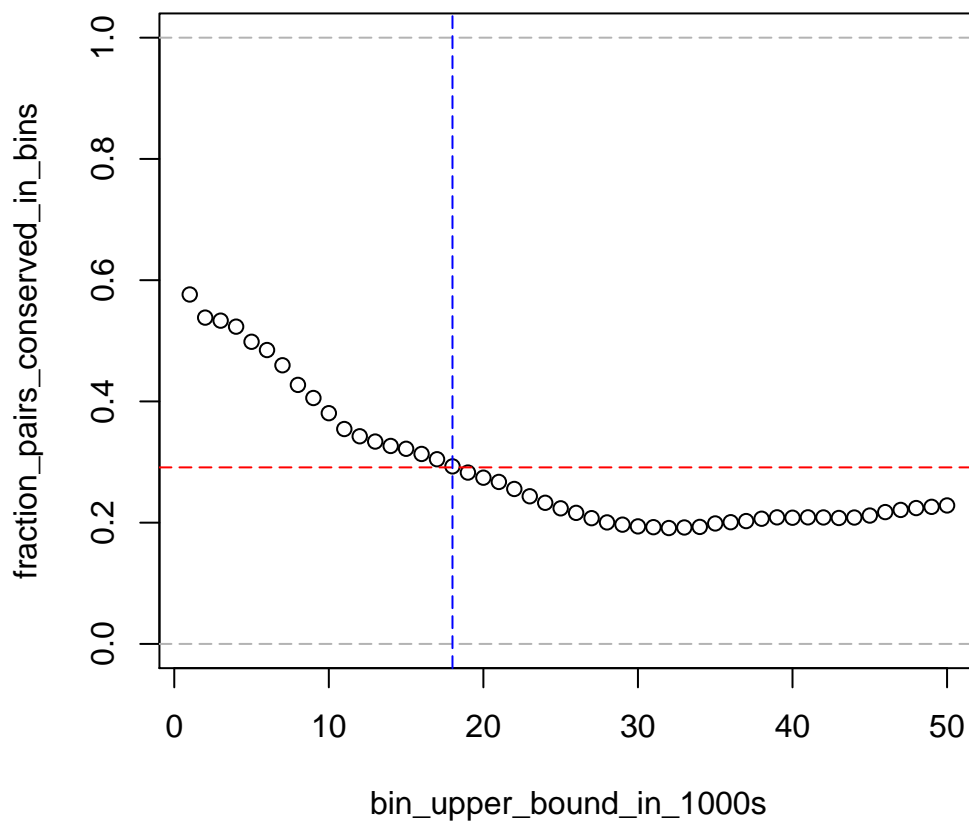

Supplement: s1 [file s1]

**Bin\_conservation\_minus\_bg\_Can0610SP\_vs\_IL-3A**  
**PD-0.68143**

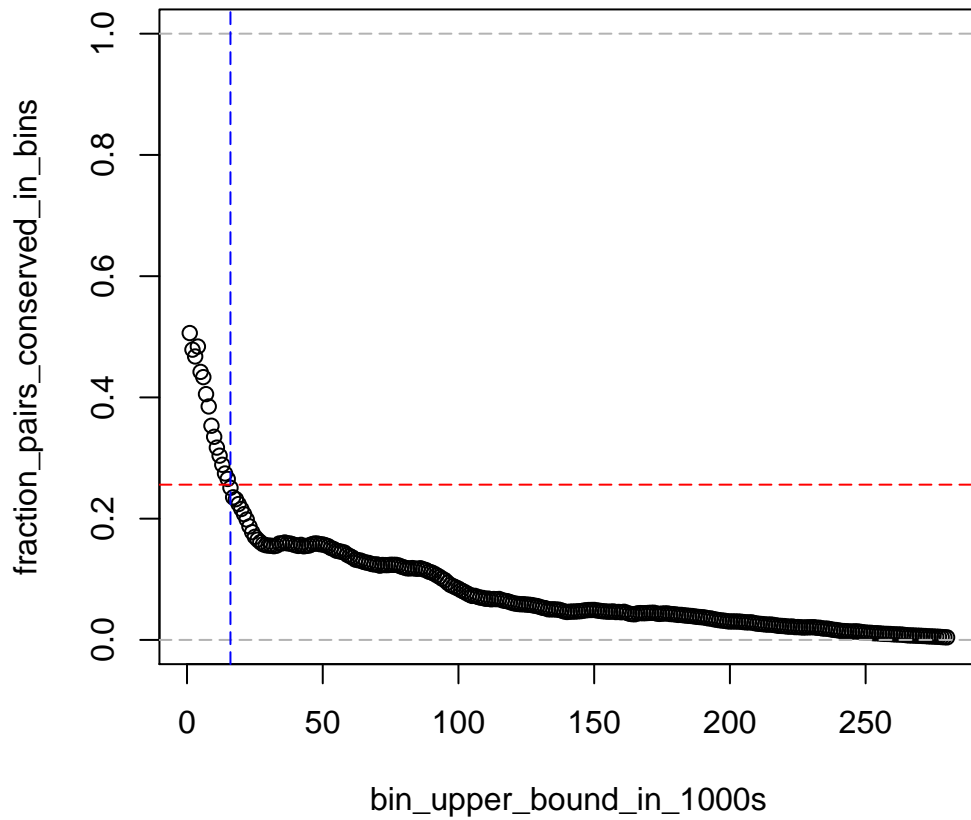

**Bin\_conservation\_minus\_bg\_Can0610SP\_vs\_IL-3A**  
**PD-0.68143**

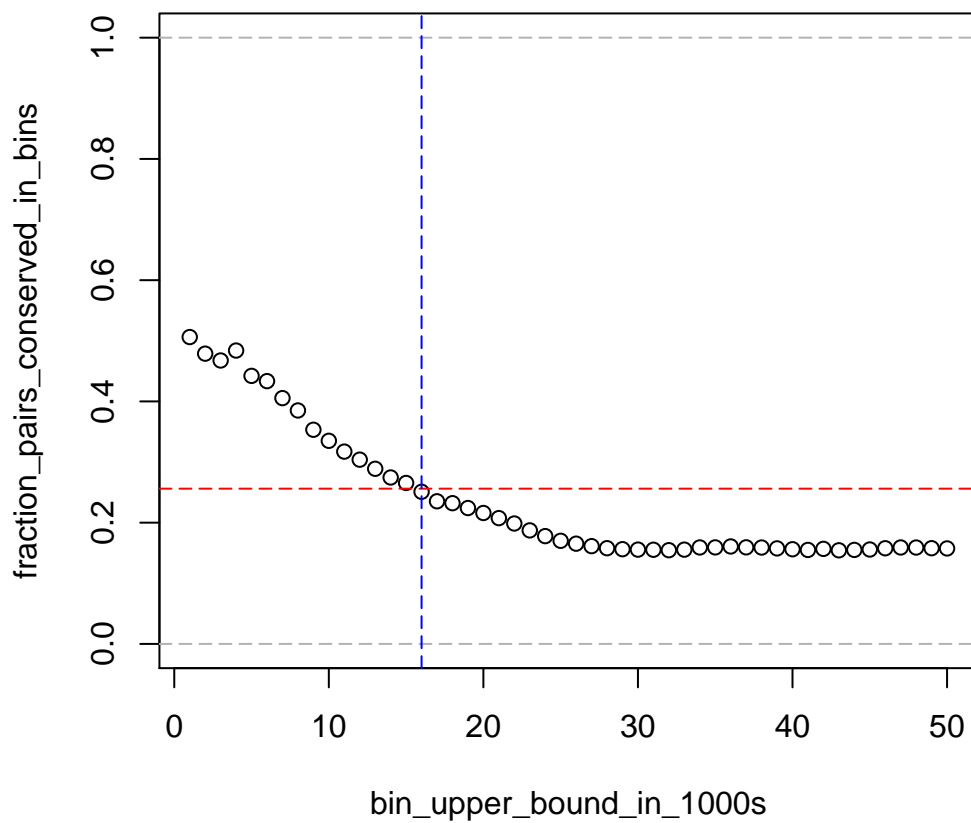

Supplement: s1 [file s1]

**Bin\_conservation\_minus\_bg\_Br0604L\_vs\_MA-1D**  
**PD-0.690111**

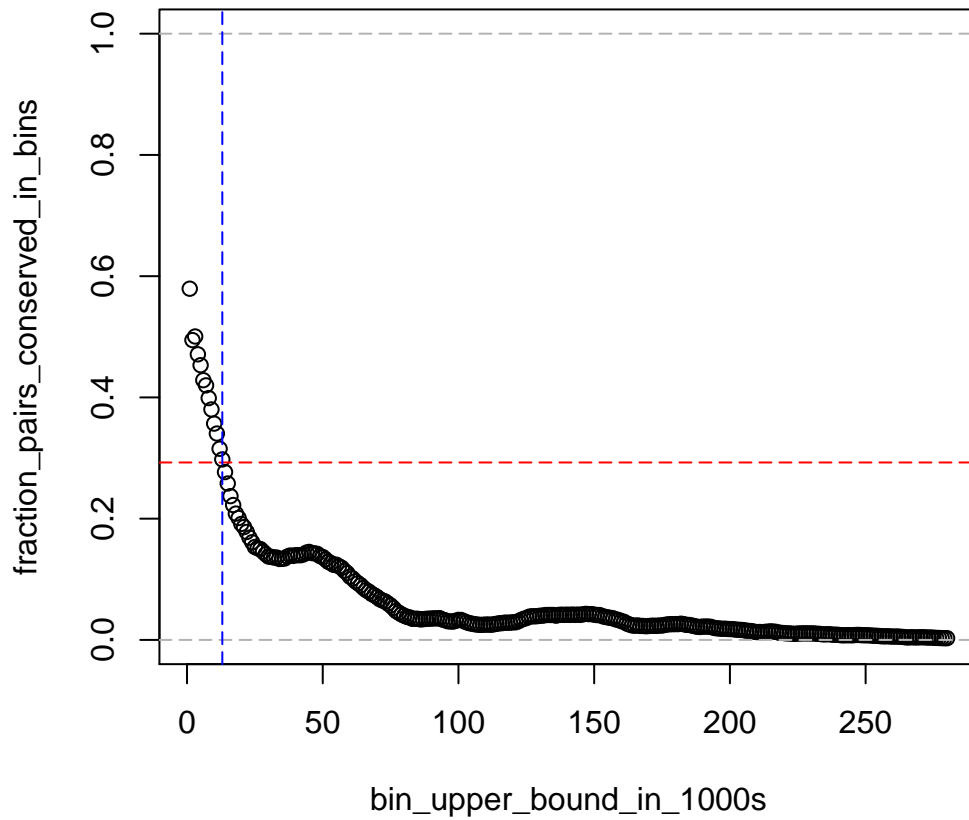

**Bin\_conservation\_minus\_bg\_Br0604L\_vs\_MA-1D**  
**PD-0.690111**

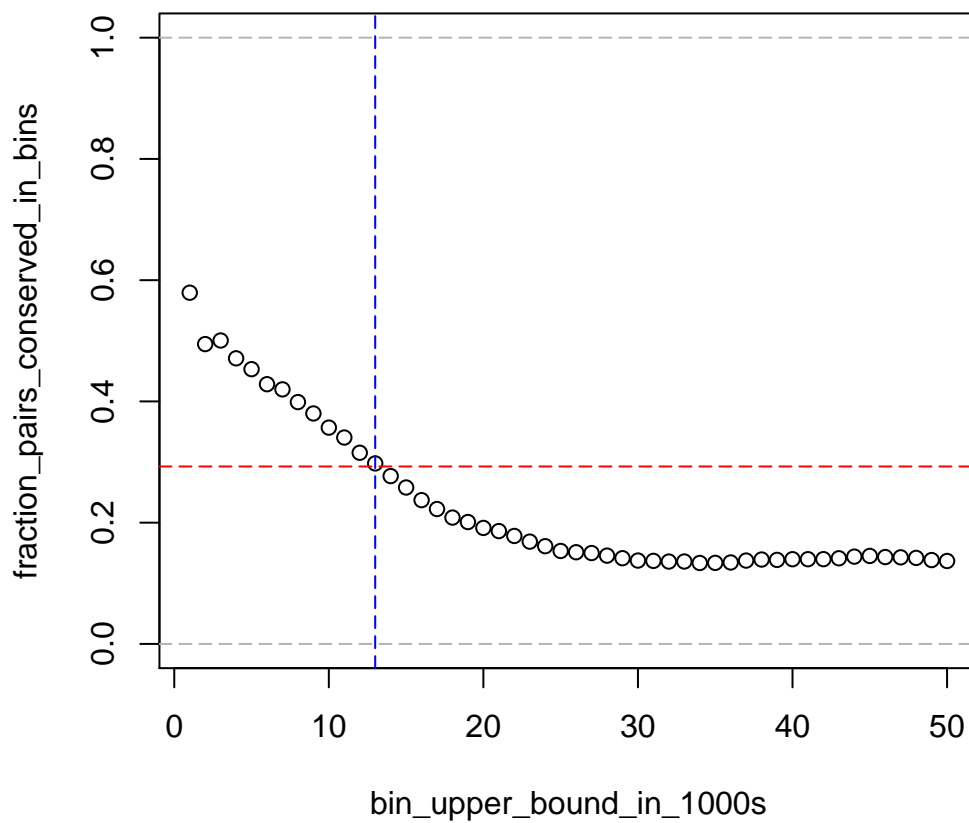

Supplement: s1 [file s1]

**Bin\_conservation\_minus\_bg\_CVM-1\_vs\_OR0704.2.2**  
**PD-0.035346**

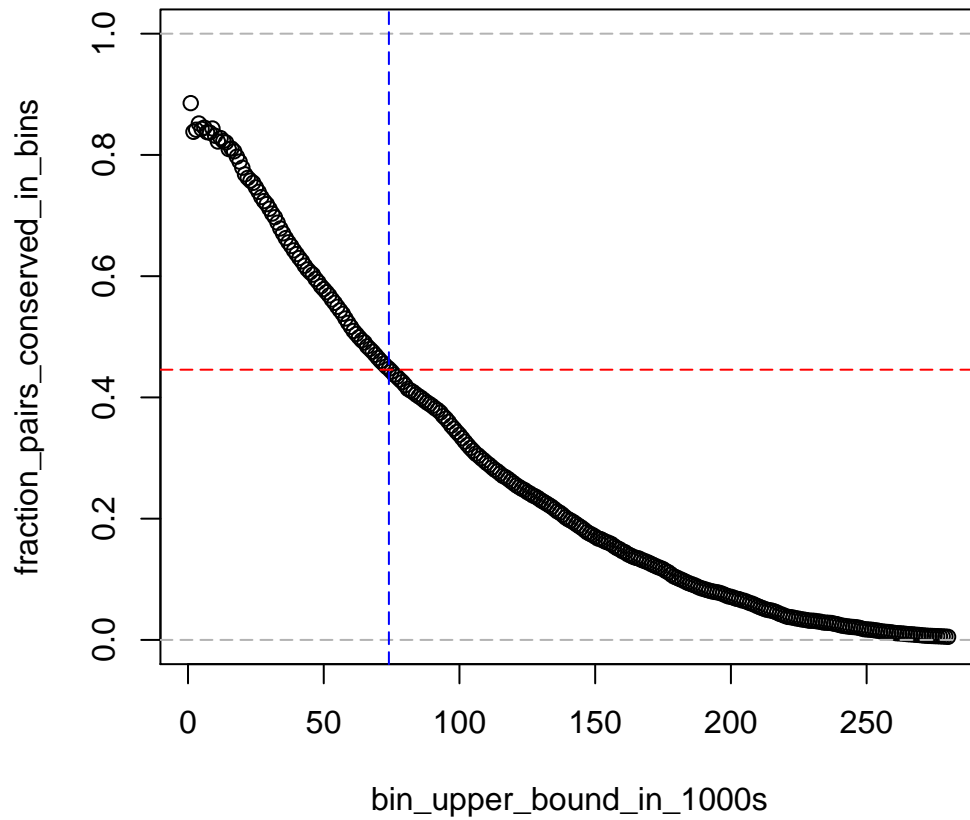

**Bin\_conservation\_minus\_bg\_CVM-1\_vs\_OR0704.2.2**  
**PD-0.035346**

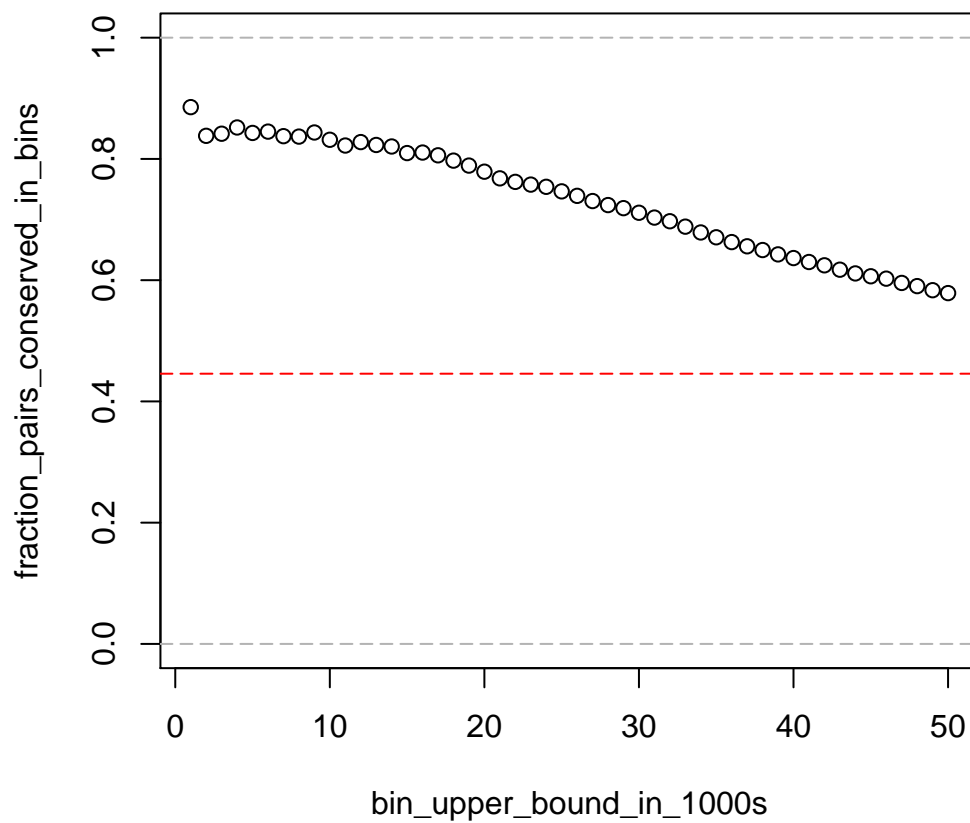

Supplement: s1 [file s1]

**Bin\_conservation\_minus\_bg\_CZ-2\_vs\_IL-5-2s1**  
**PD-0.666299**

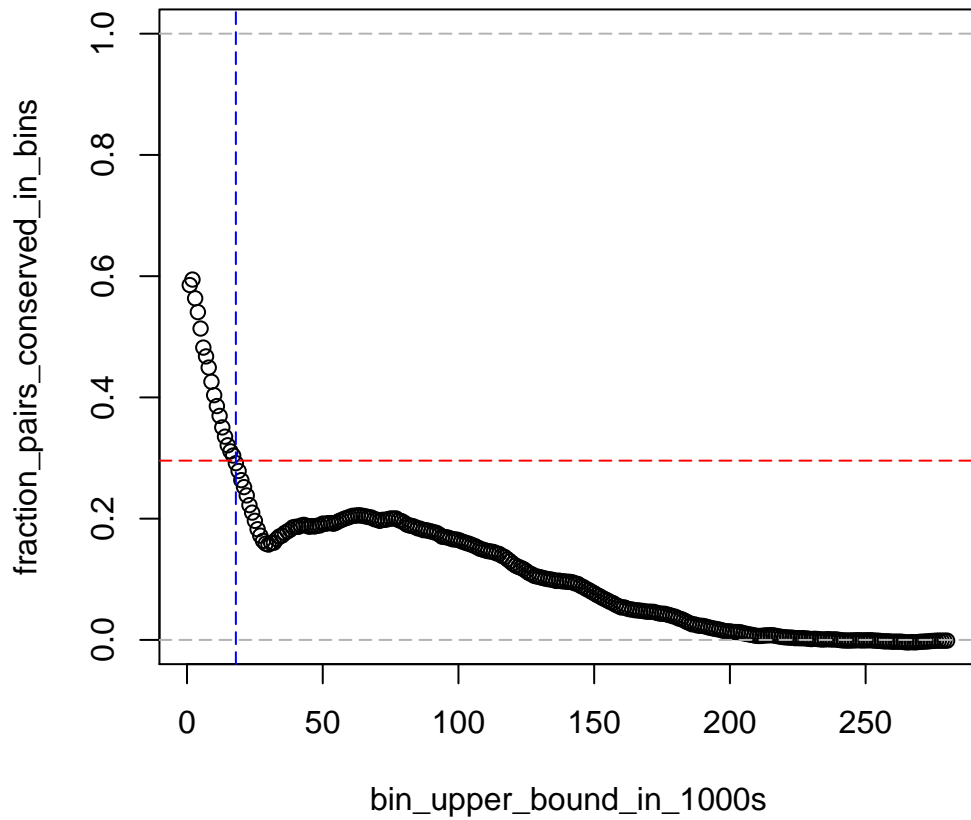

**Bin\_conservation\_minus\_bg\_CZ-2\_vs\_IL-5-2s1**  
**PD-0.666299**

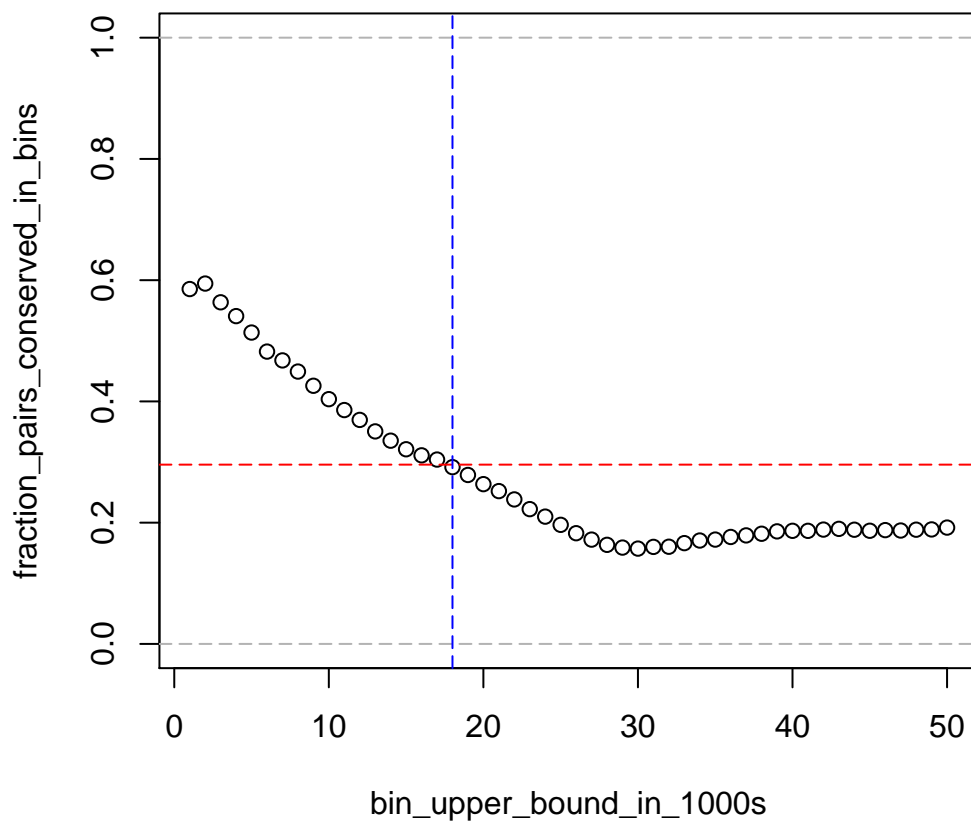

Supplement: s1 [file s1]

**Bin\_conservation\_minus\_bg\_IL-3A\_vs\_IL-5-2s1**  
**PD-0.135234**

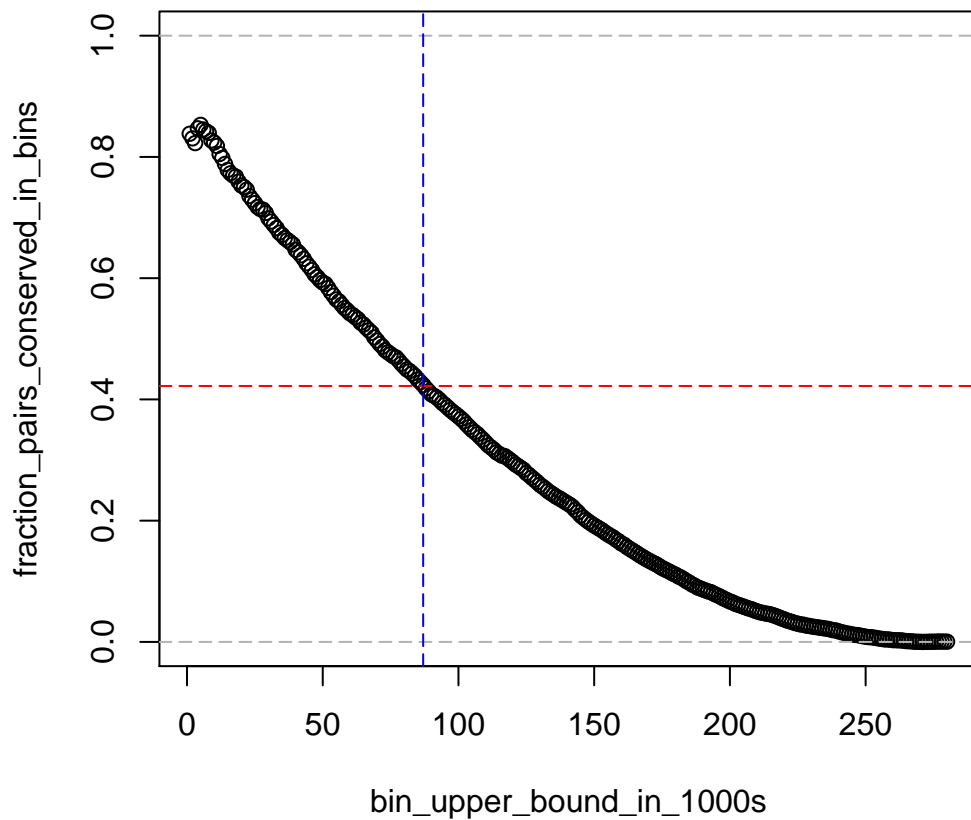

**Bin\_conservation\_minus\_bg\_IL-3A\_vs\_IL-5-2s1**  
**PD-0.135234**

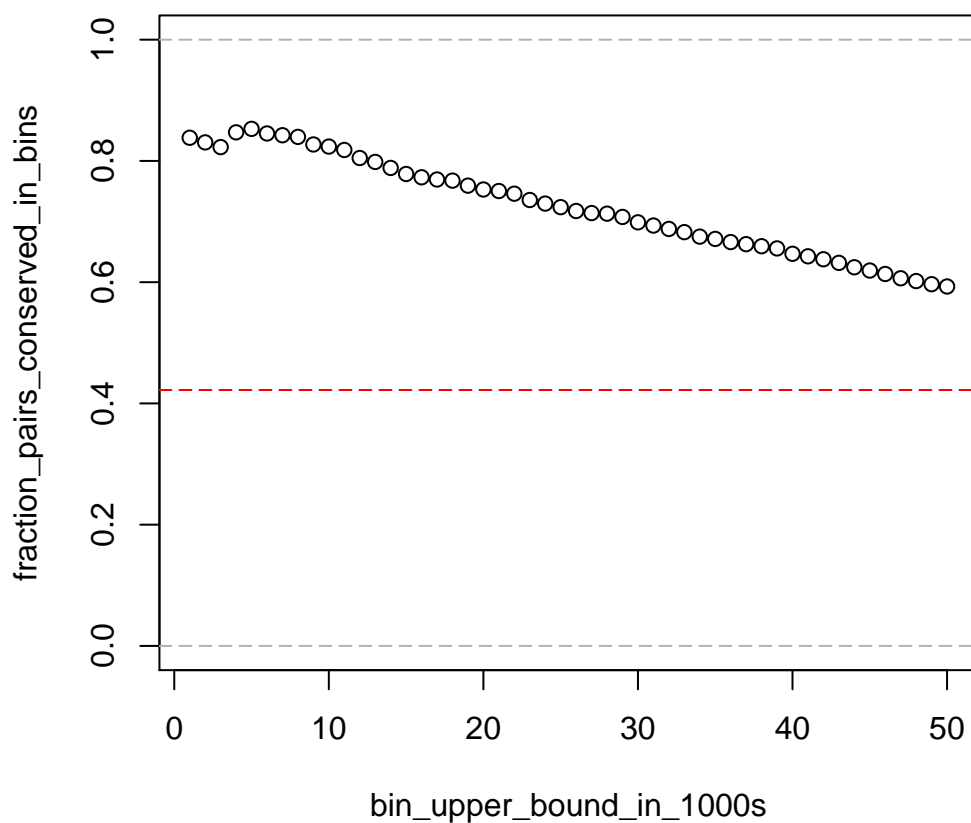

Supplement: s1 [file s1]

**Bin\_conservation\_minus\_bg\_Br0604L\_vs\_IL-5-2s1**  
**PD-0.692638**

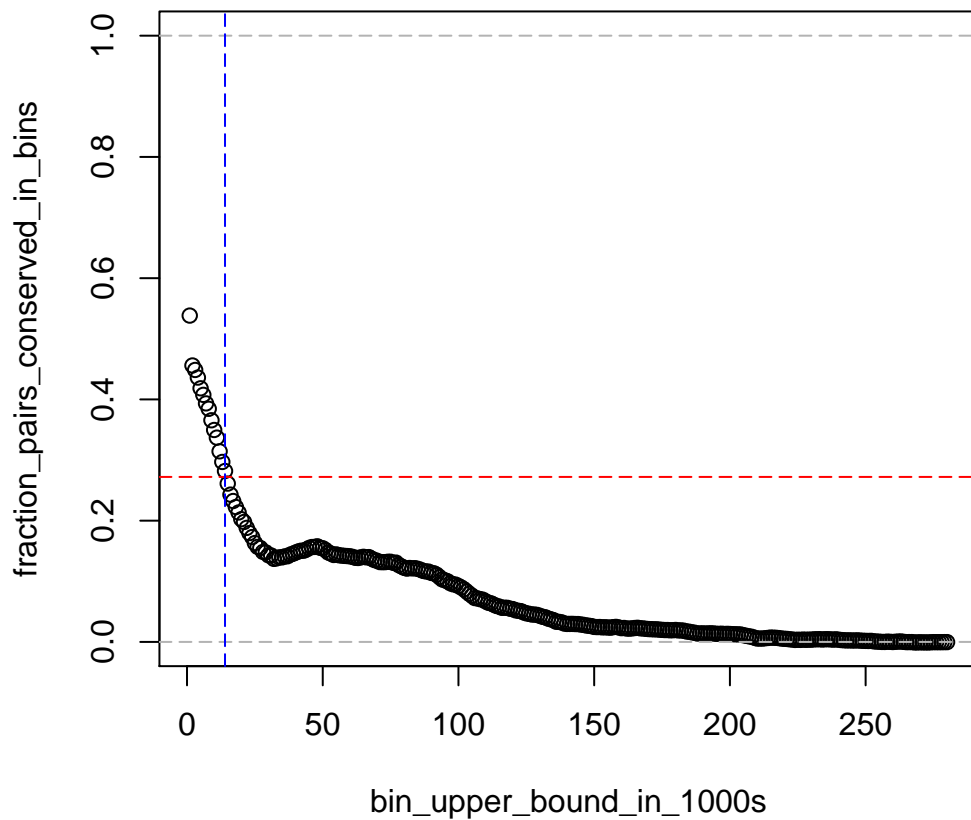

**Bin\_conservation\_minus\_bg\_Br0604L\_vs\_IL-5-2s1**  
**PD-0.692638**

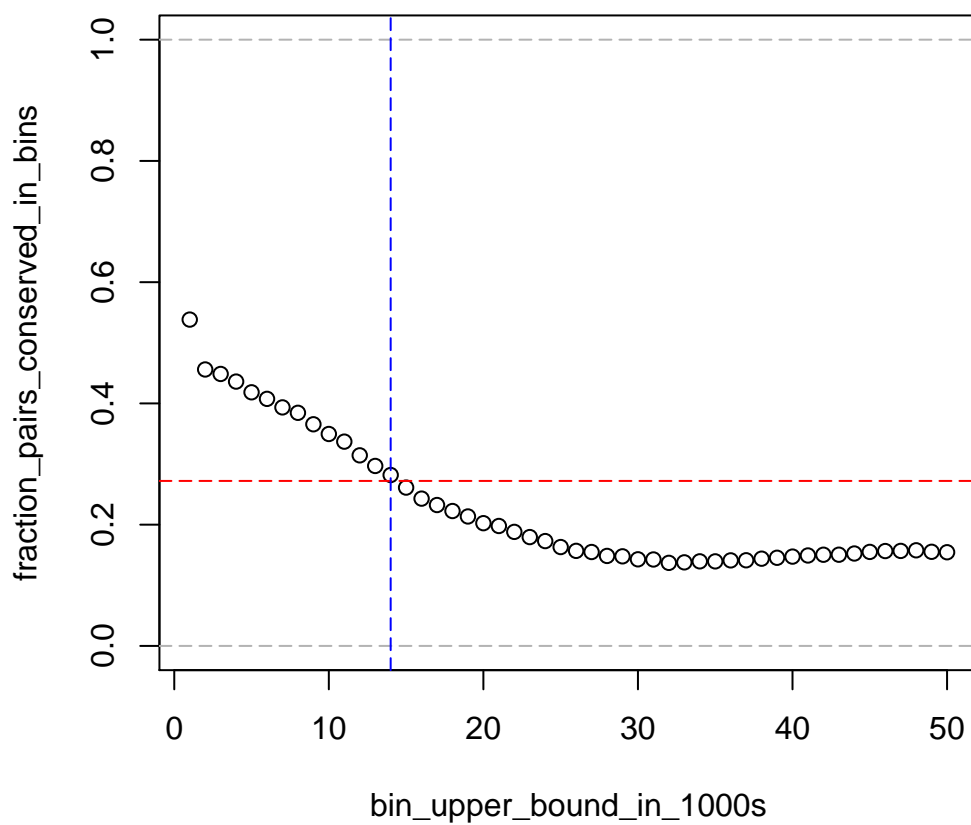

Supplement: s1 [file s1]

**Bin\_conservation\_minus\_bg\_Can0610SP\_vs\_MA-1D**  
**PD-0.701085**

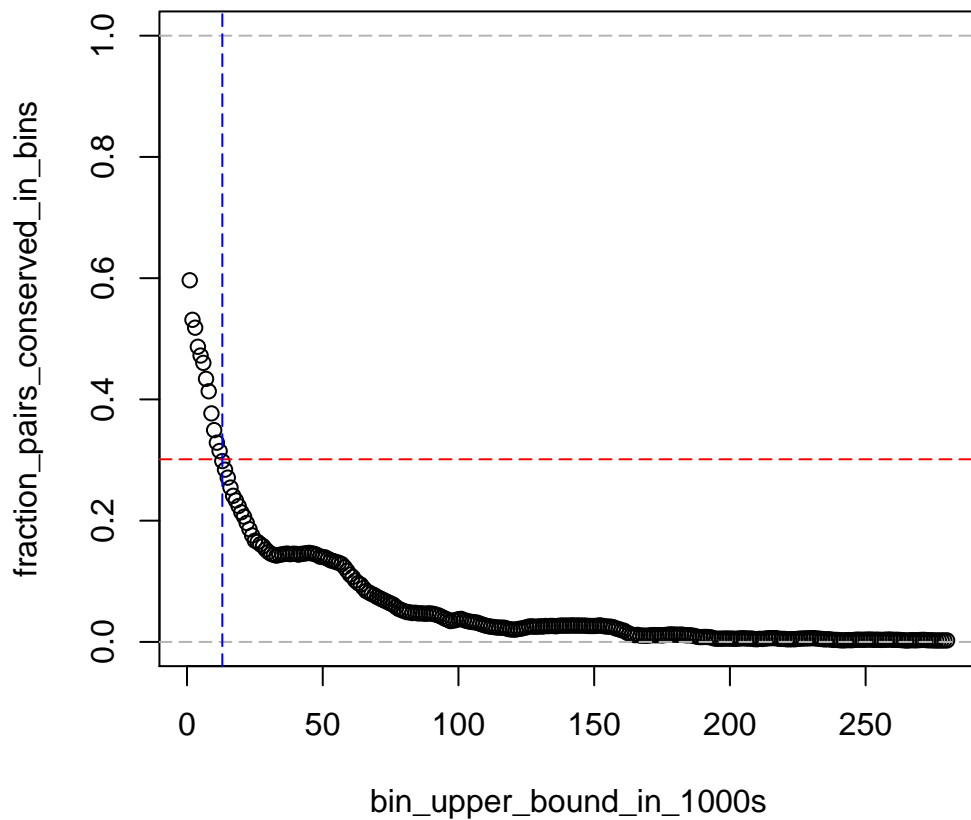

**Bin\_conservation\_minus\_bg\_Can0610SP\_vs\_MA-1D**  
**PD-0.701085**

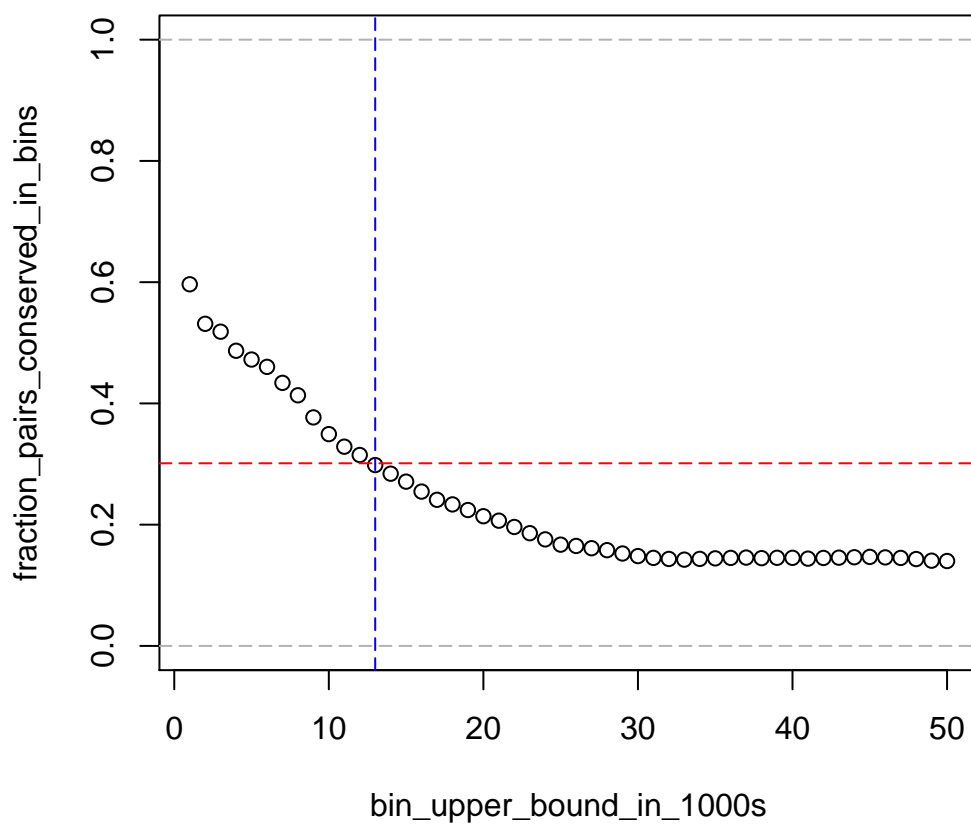

Supplement: s1 [file s1]

**Bin\_conservation\_minus\_bg\_AN69C\_vs\_NTS-1**  
**PD-0.673174**

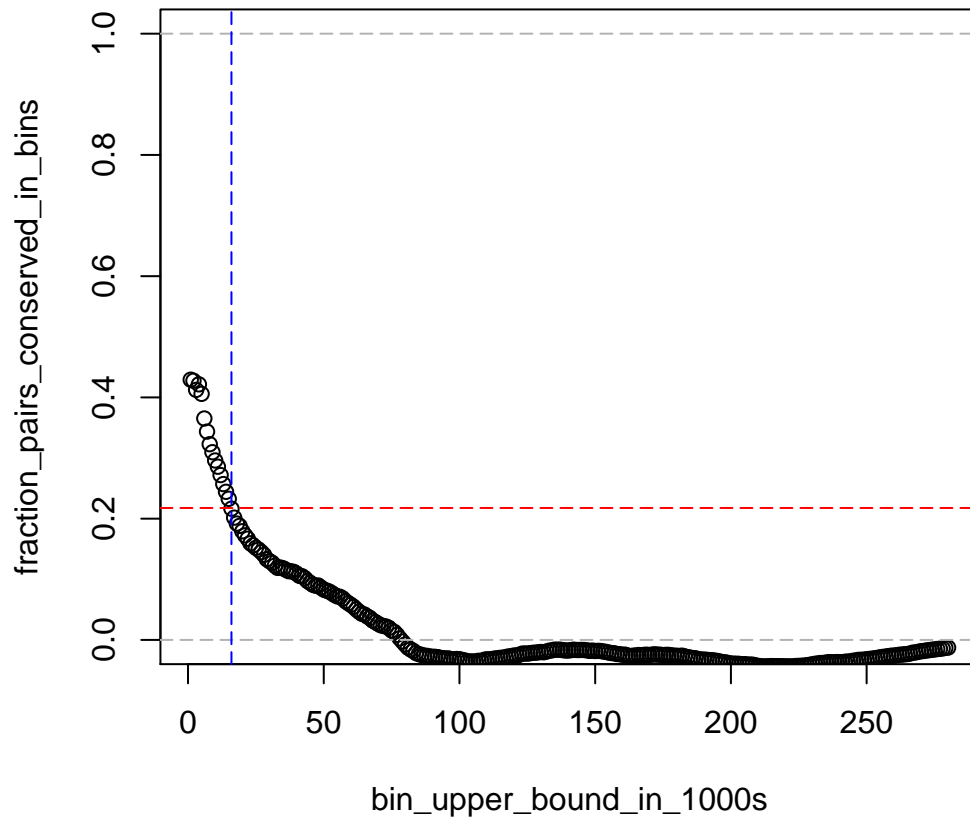

**Bin\_conservation\_minus\_bg\_AN69C\_vs\_NTS-1**  
**PD-0.673174**

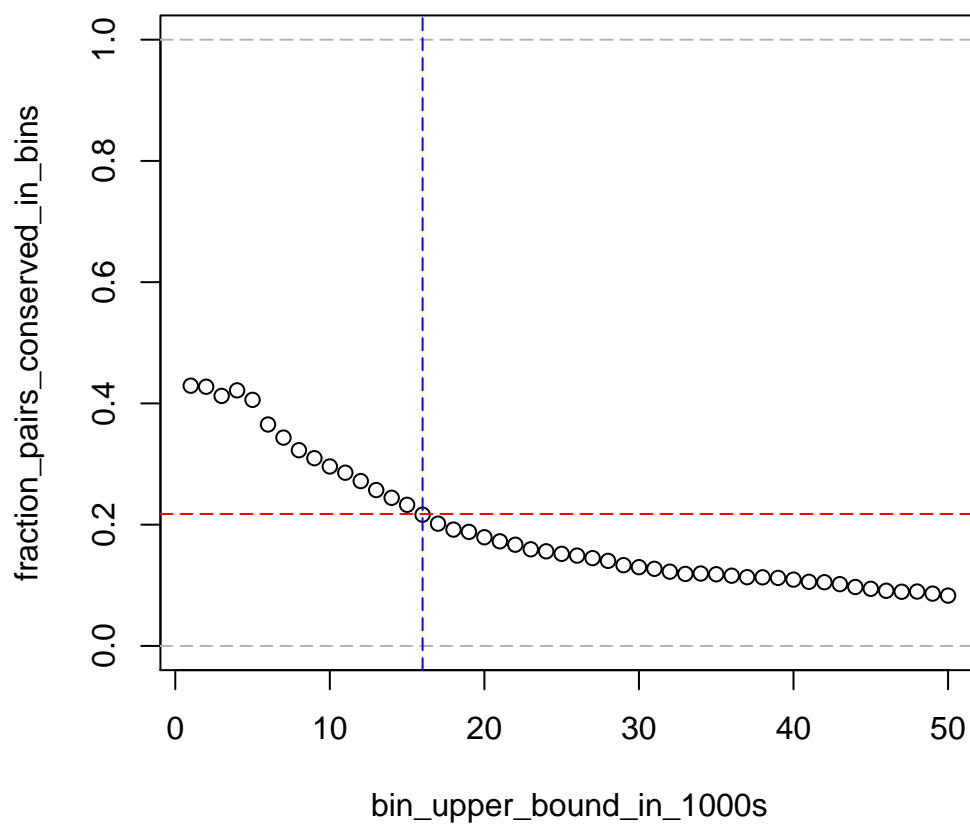

Supplement: s1 [file s1]

**Bin\_conservation\_minus\_bg\_CVR-1\_vs\_MN0810.1**  
**PD-0.455347**

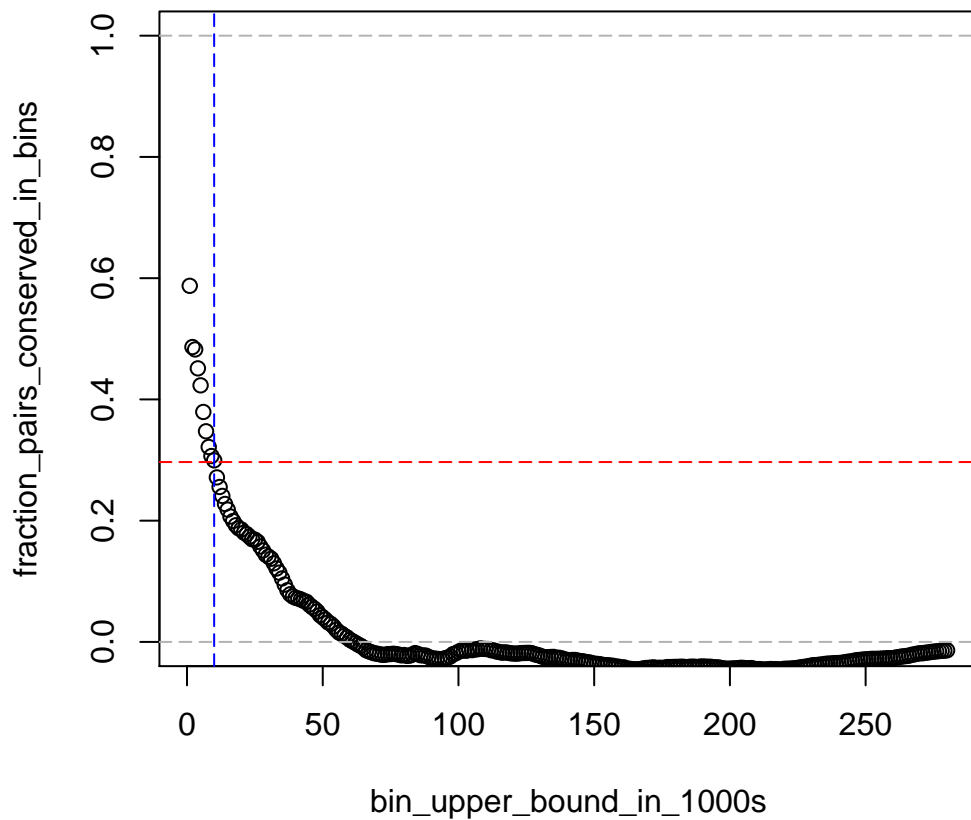

**Bin\_conservation\_minus\_bg\_CVR-1\_vs\_MN0810.1**  
**PD-0.455347**

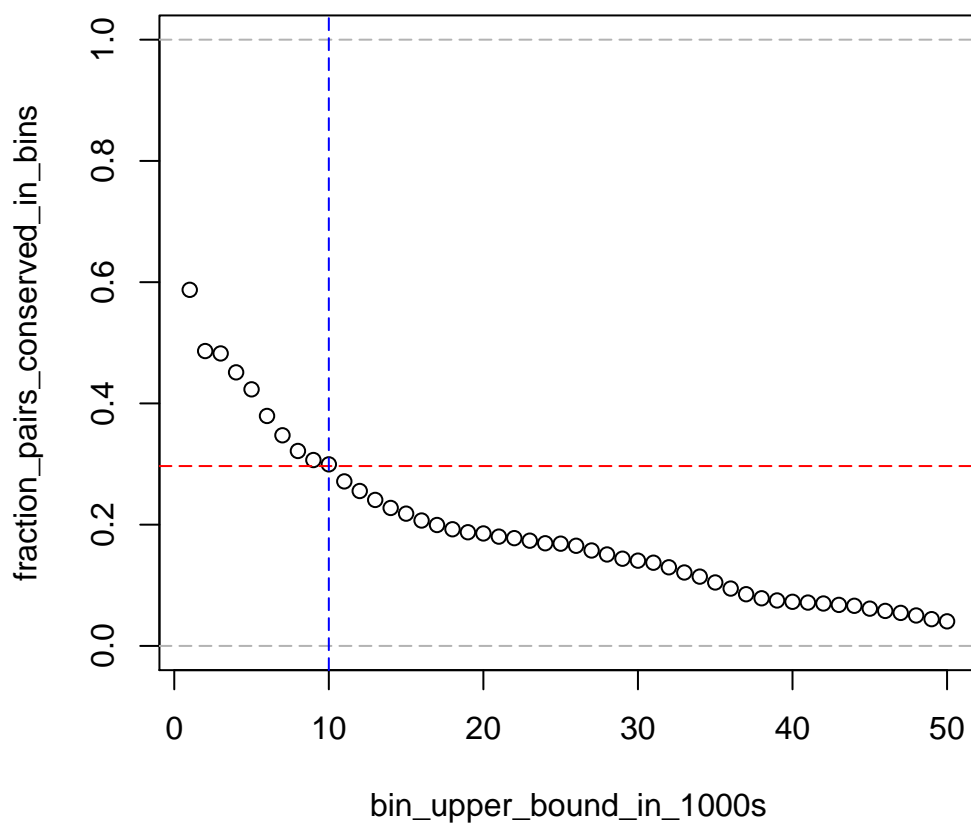

Supplement: s1 [file s1]

**Bin\_conservation\_minus\_bg\_IL-5-2s1\_vs\_KS1B**  
**PD-0.147434**

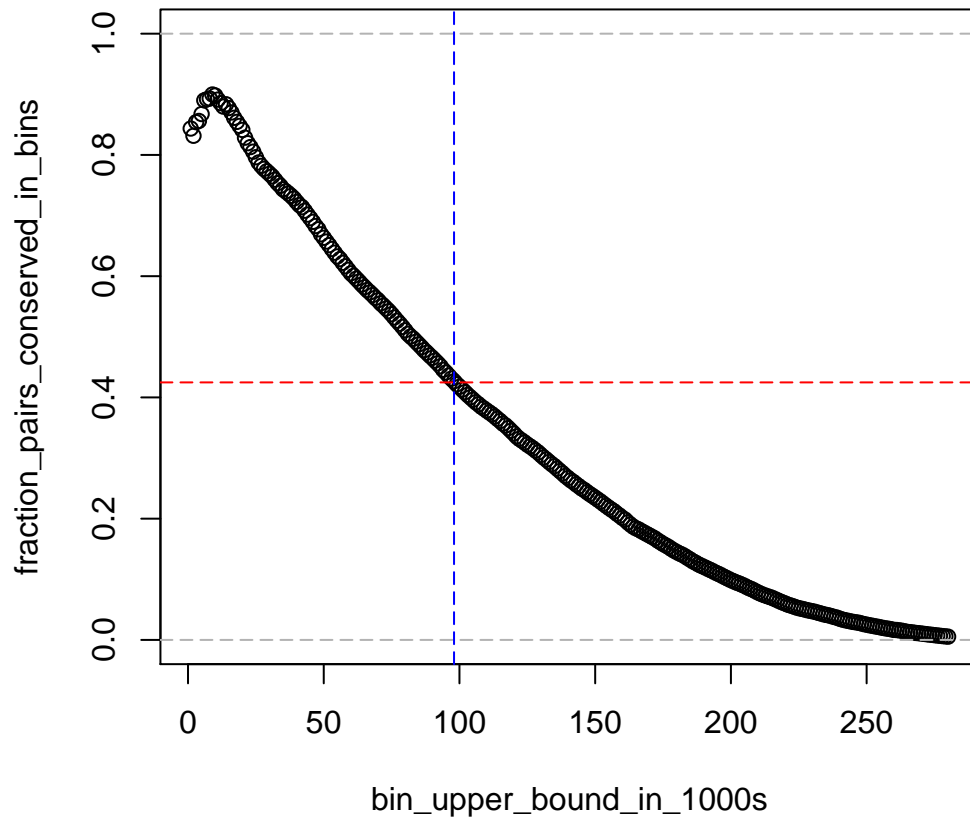

**Bin\_conservation\_minus\_bg\_IL-5-2s1\_vs\_KS1B**  
**PD-0.147434**

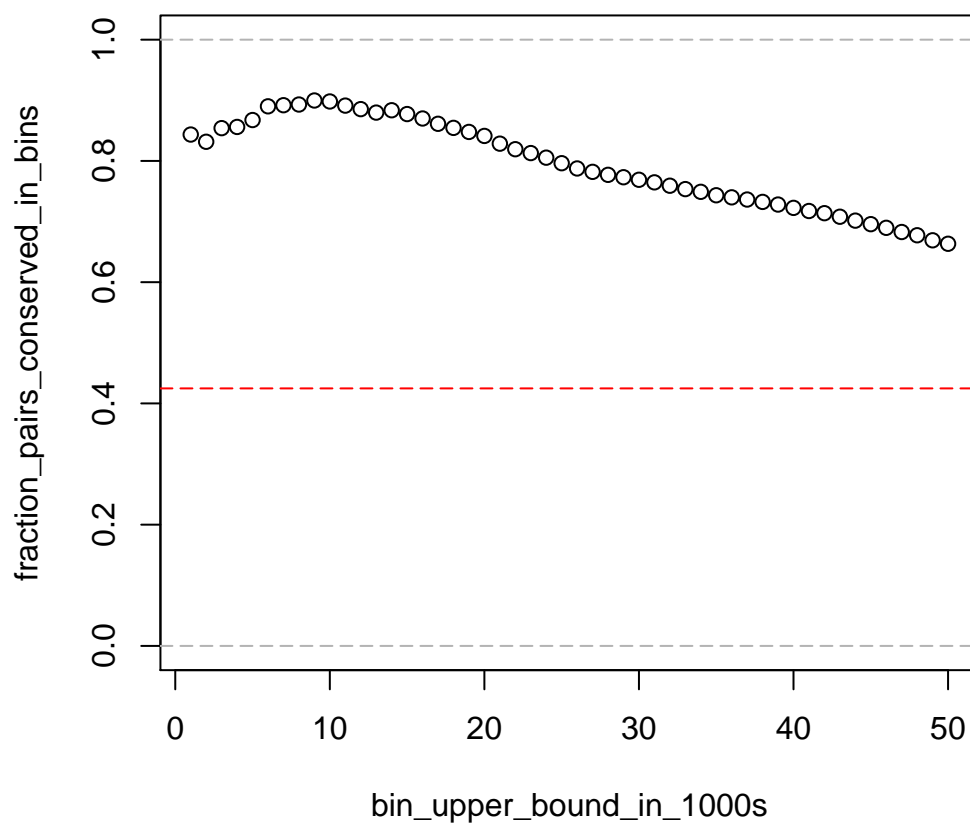

Supplement: s1 [file s1]

**Bin\_conservation\_minus\_bg\_AR158\_vs\_IL-3A**  
**PD-0.137279**

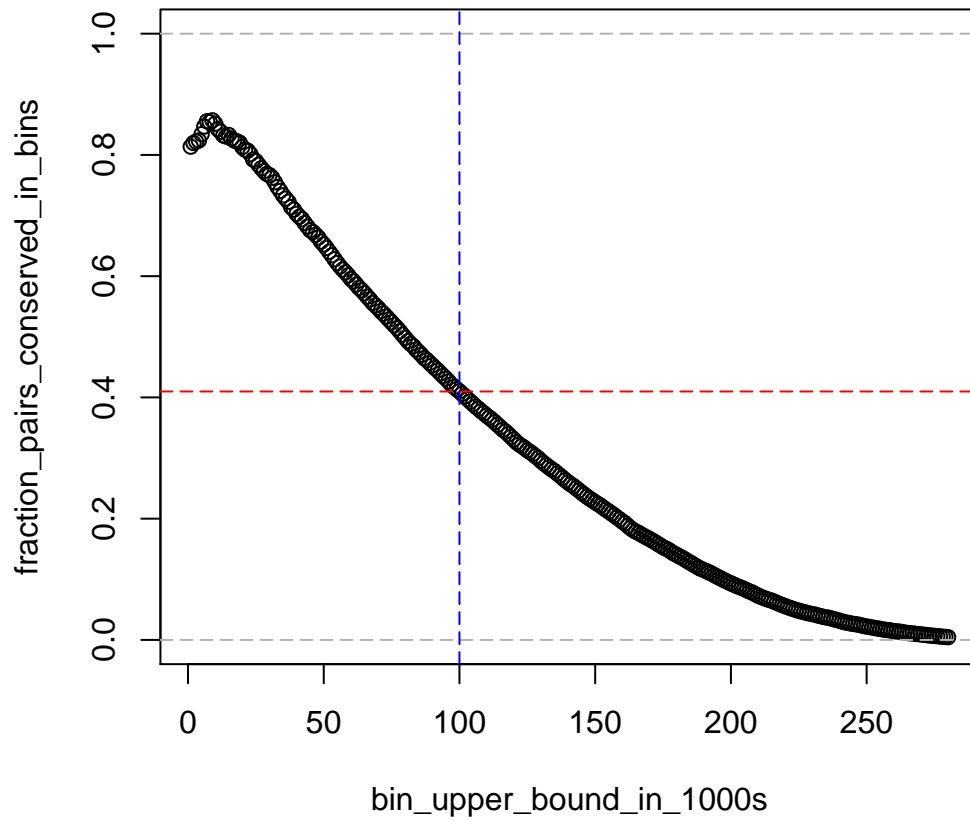

**Bin\_conservation\_minus\_bg\_AR158\_vs\_IL-3A**  
**PD-0.137279**

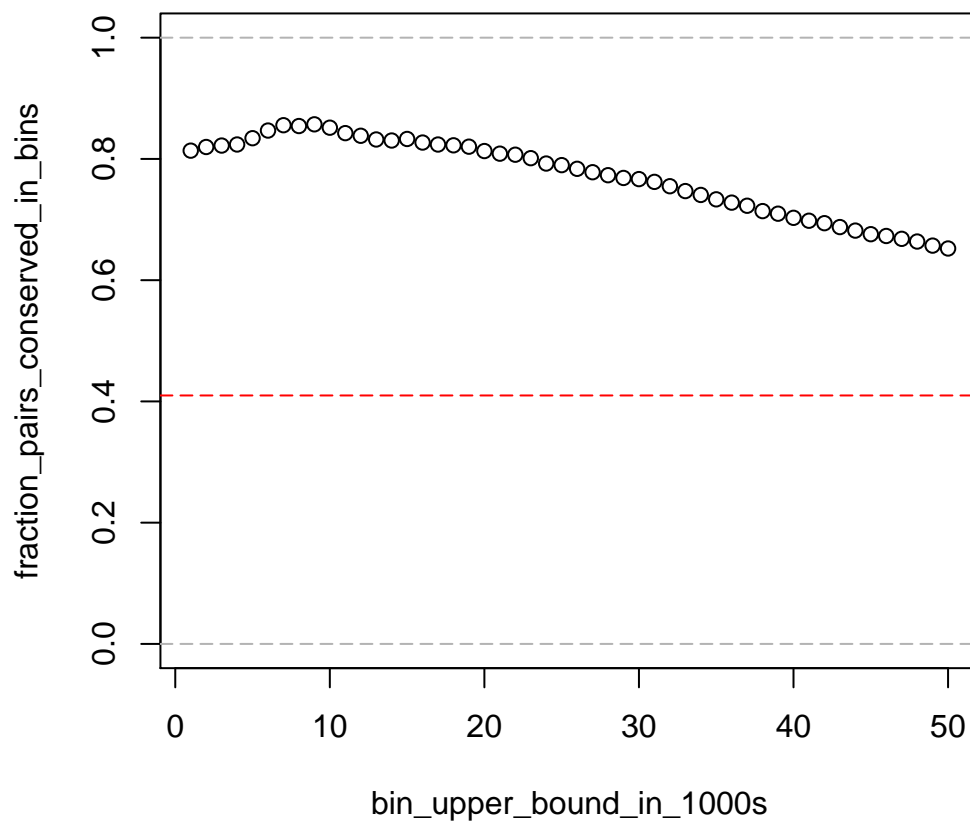

Supplement: s1 [file s1]

**Bin\_conservation\_minus\_bg\_CVA-1\_vs\_NE-JV-2**  
**PD-0.45755**

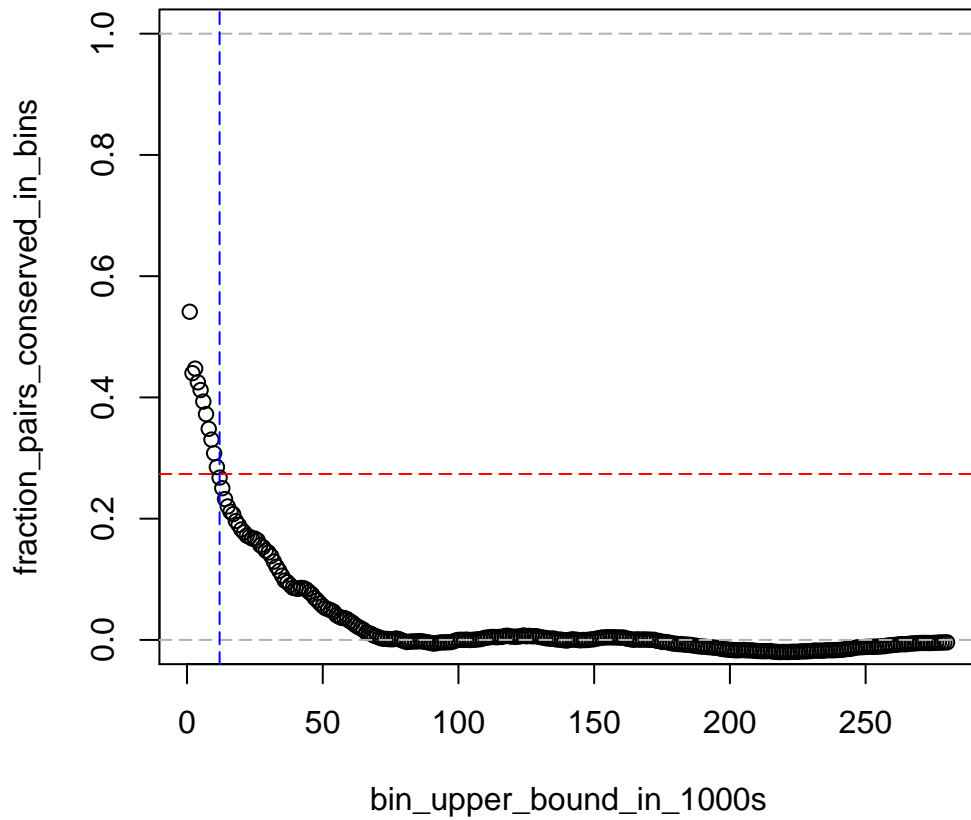

**Bin\_conservation\_minus\_bg\_CVA-1\_vs\_NE-JV-2**  
**PD-0.45755**

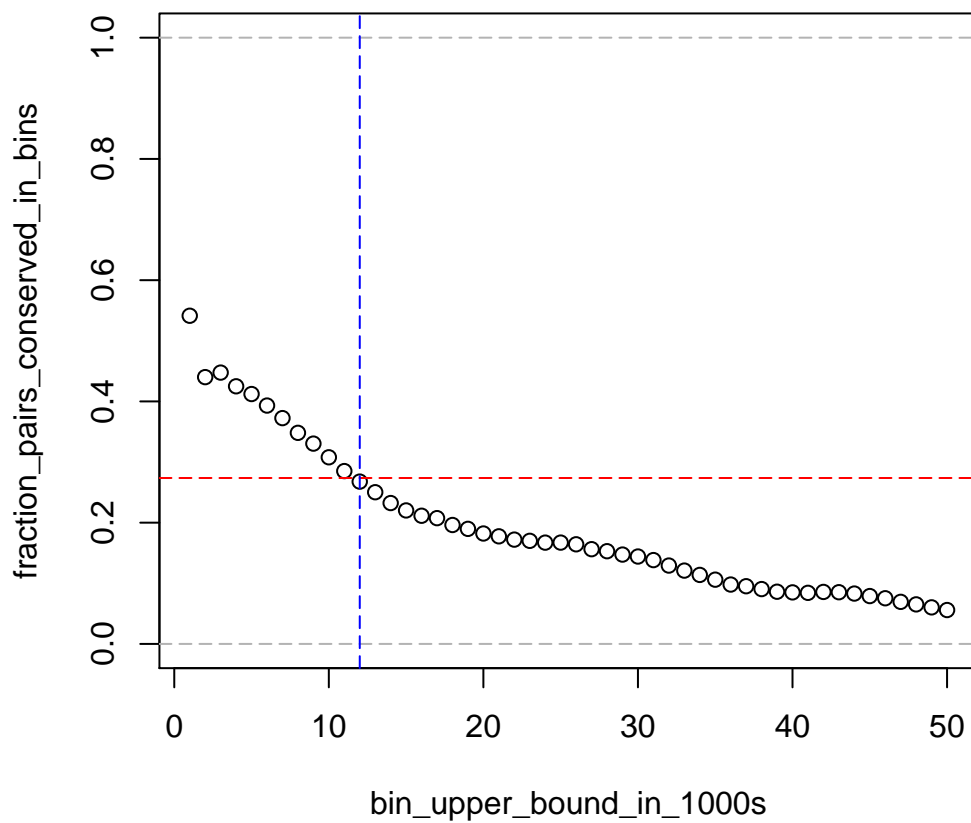

Supplement: s1 [file s1]

**Bin\_conservation\_minus\_bg\_MN0810.1\_vs\_PBCV1**  
**PD-0.674495**

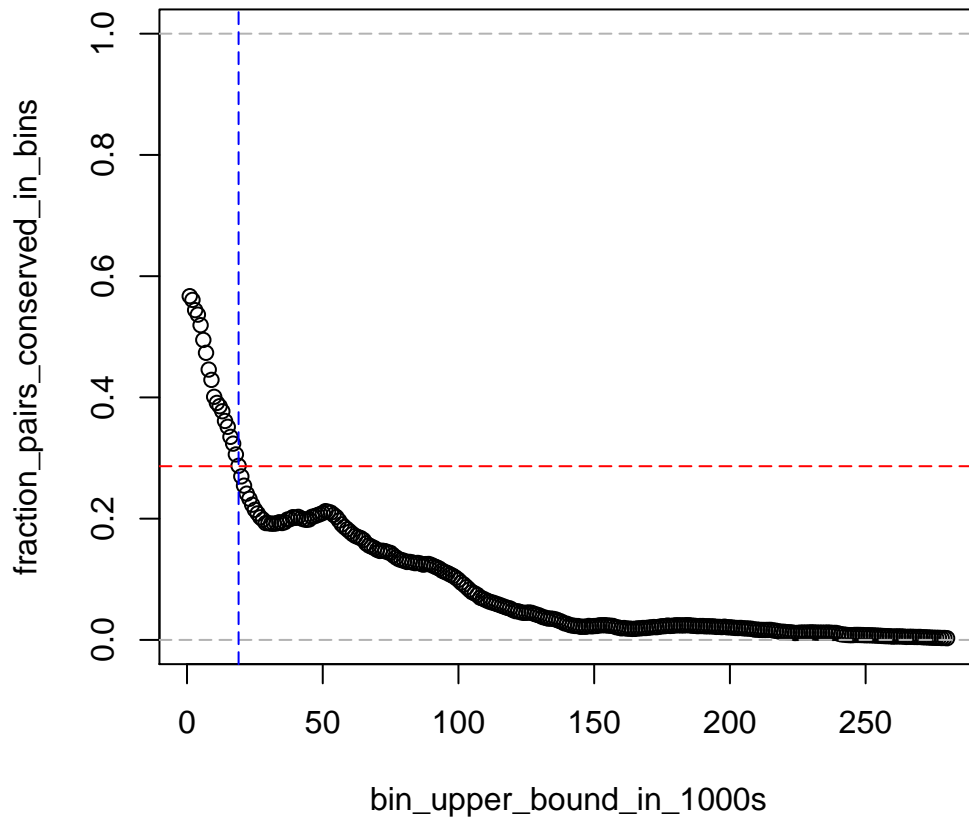

**Bin\_conservation\_minus\_bg\_MN0810.1\_vs\_PBCV1**  
**PD-0.674495**

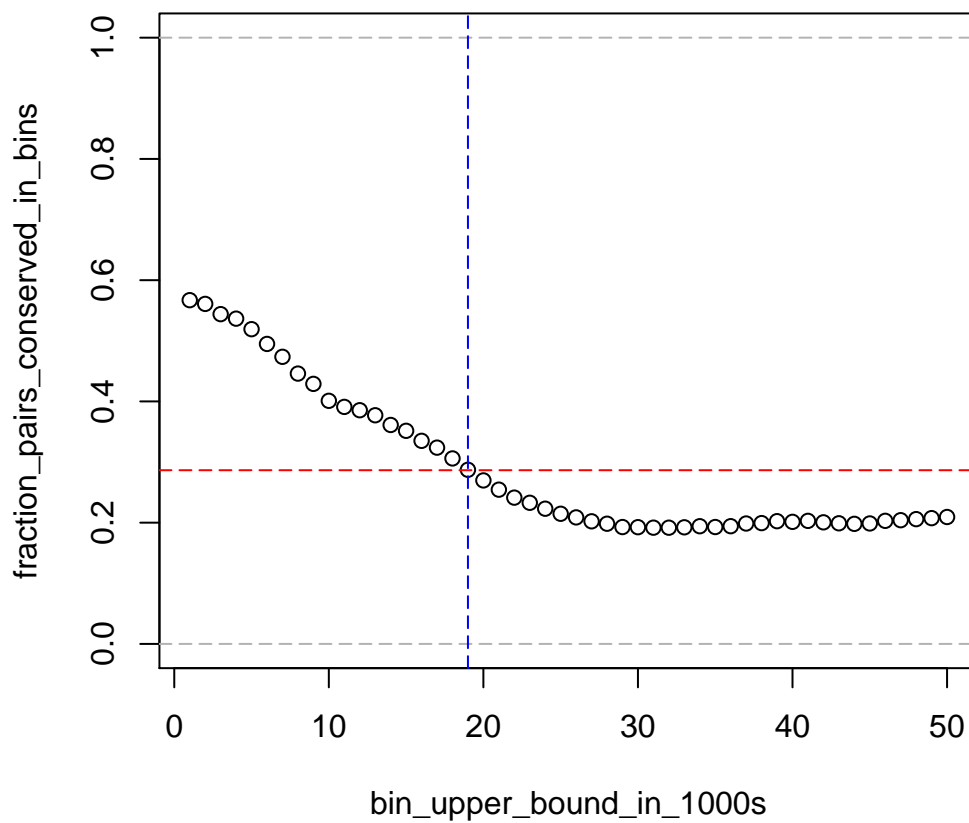

Supplement: s1 [file s1]

**Bin\_conservation\_minus\_bg\_Br0604L\_vs\_NE-JV-1**  
**PD-0.483156**

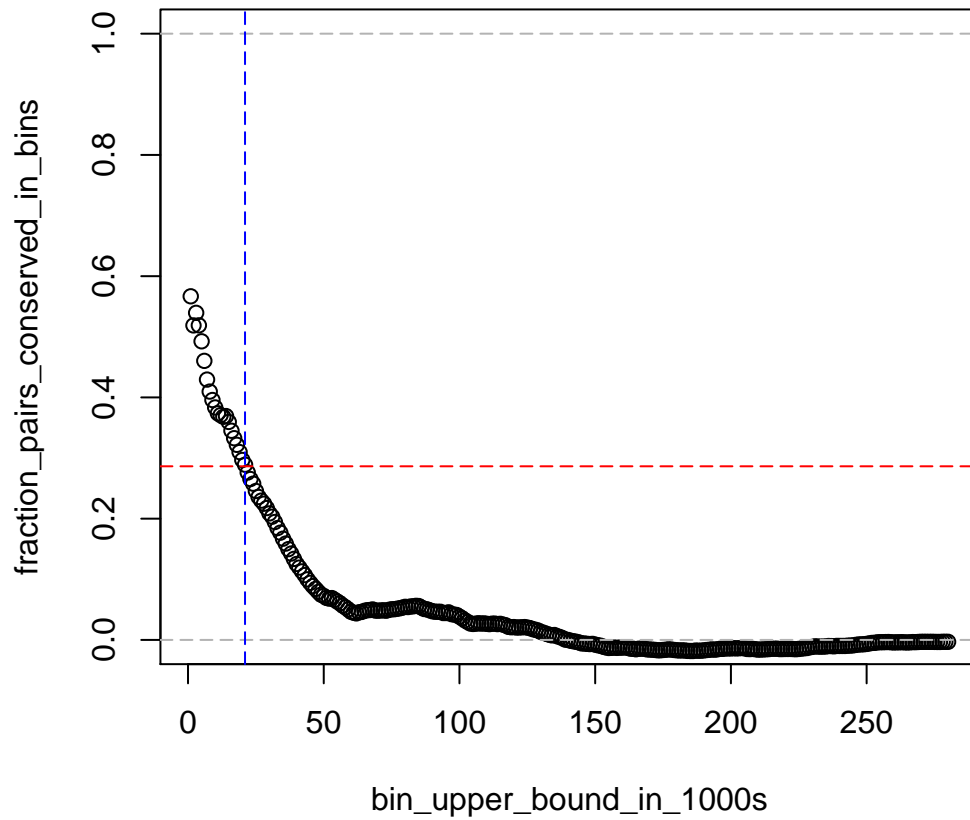

**Bin\_conservation\_minus\_bg\_Br0604L\_vs\_NE-JV-1**  
**PD-0.483156**

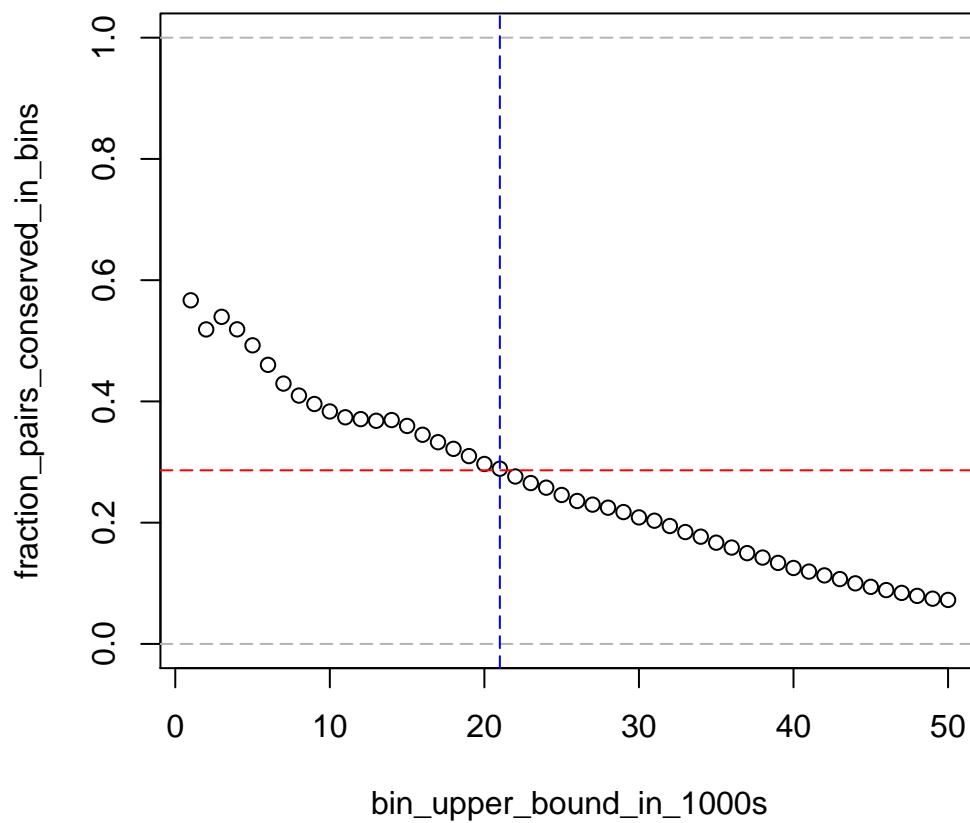

Supplement: s1 [file s1]

**Bin\_conservation\_minus\_bg\_AR158\_vs\_CvsA1**  
**PD-0.150719**

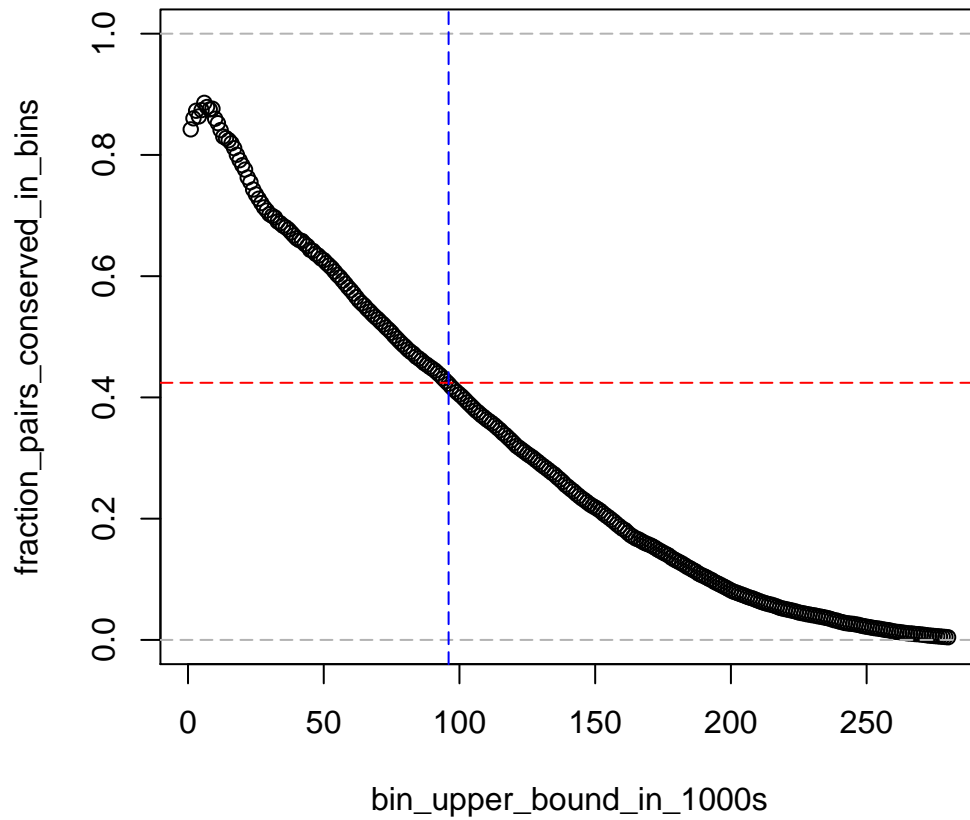

**Bin\_conservation\_minus\_bg\_AR158\_vs\_CvsA1**  
**PD-0.150719**

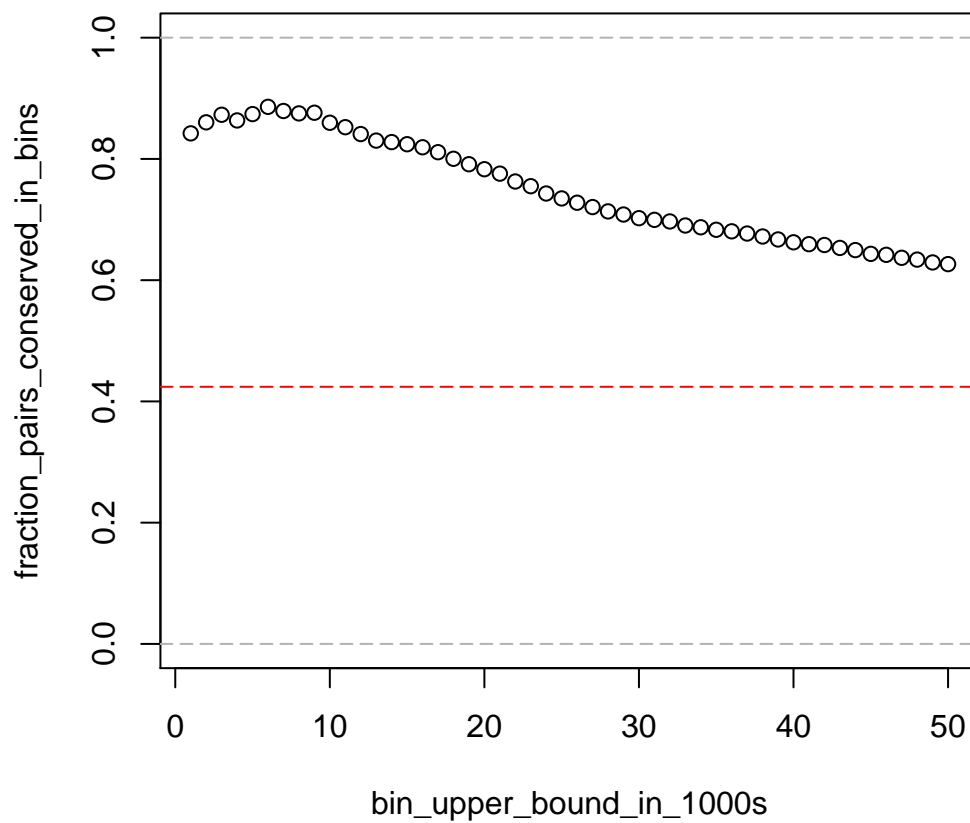

Supplement: s1 [file s1]

**Bin\_conservation\_minus\_bg\_NE-JV-4\_vs\_NY-2B**  
**PD-0.137699**

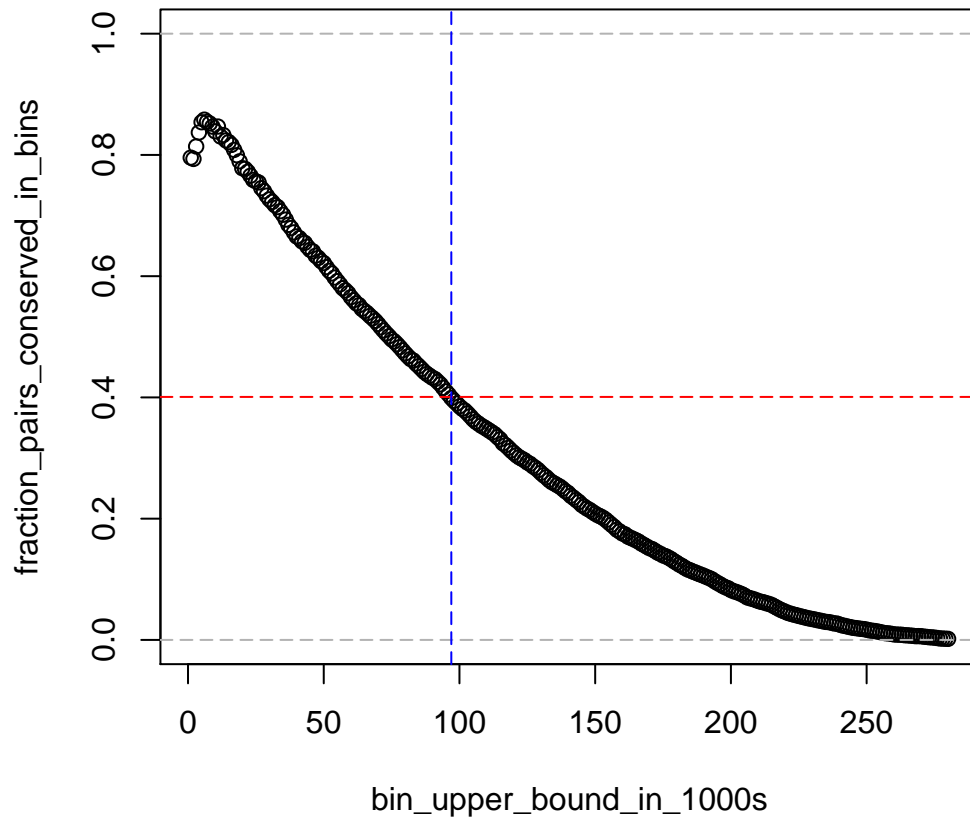

**Bin\_conservation\_minus\_bg\_NE-JV-4\_vs\_NY-2B**  
**PD-0.137699**

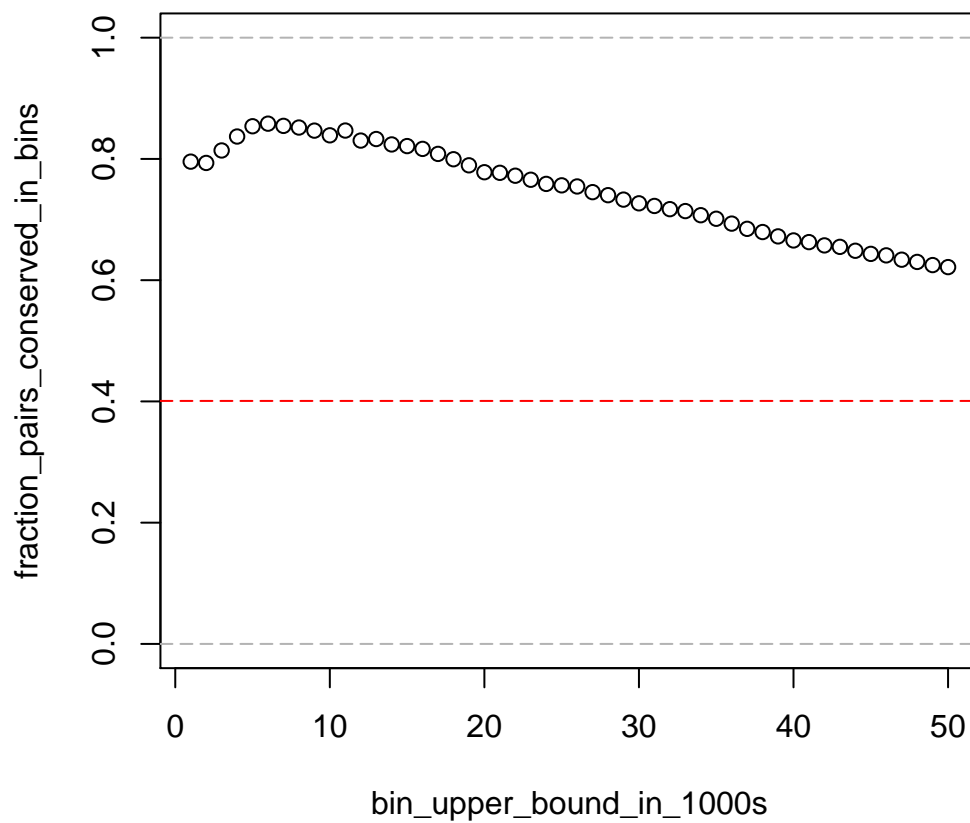

Supplement: s1 [file s1]

**Bin\_conservation\_minus\_bg\_AN69C\_vs\_CVG-1**  
**PD-0.637955**

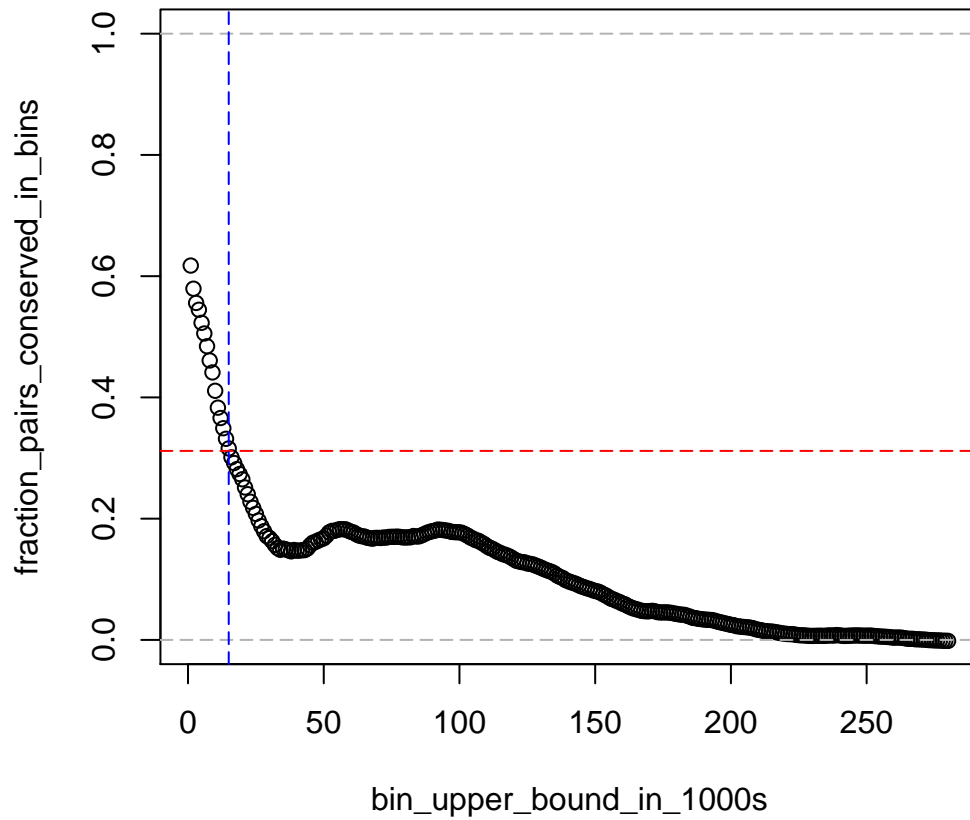

**Bin\_conservation\_minus\_bg\_AN69C\_vs\_CVG-1**  
**PD-0.637955**

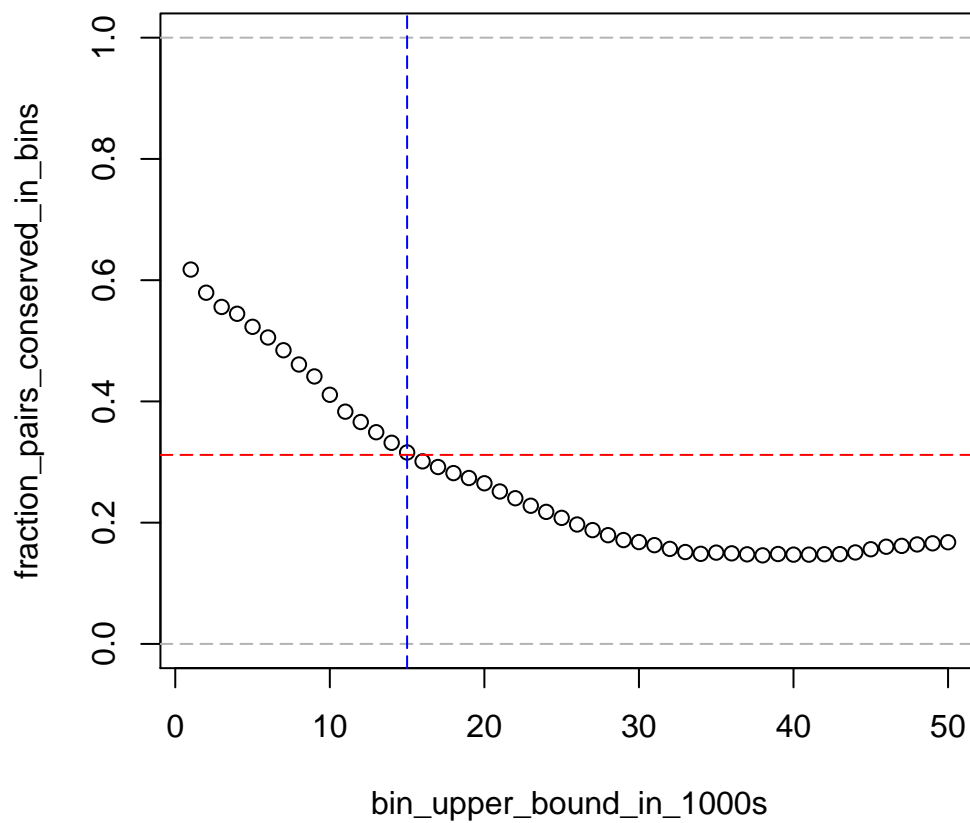

Supplement: s1 [file s1]

**Bin\_conservation\_minus\_bg\_CvsA1\_vs\_MT325**  
**PD-0.651558**

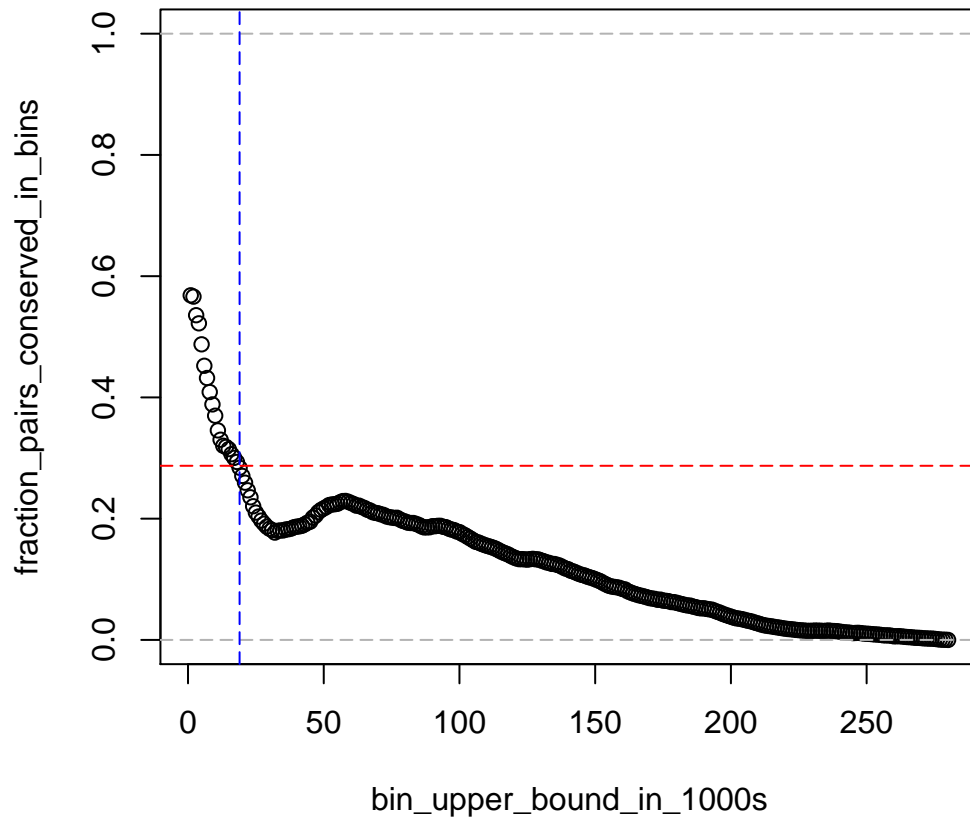

**Bin\_conservation\_minus\_bg\_CvsA1\_vs\_MT325**  
**PD-0.651558**

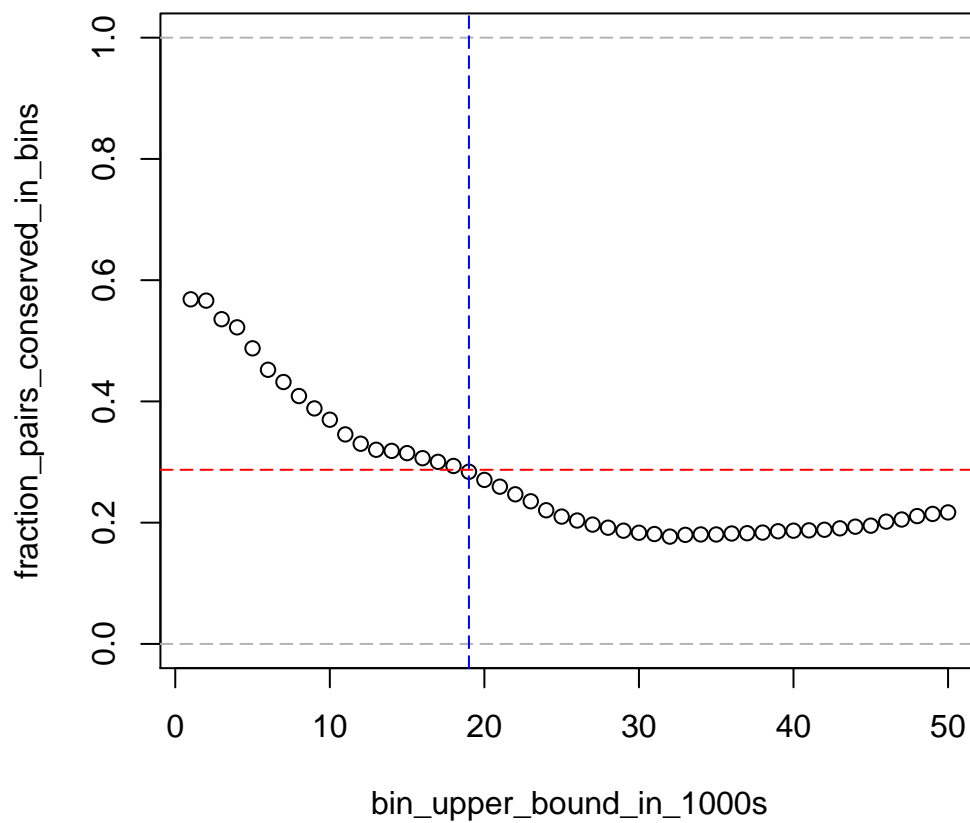

Supplement: s1 [file s1]

**Bin\_conservation\_minus\_bg\_MA-1E\_vs\_TN603.4.2**  
**PD-0.684334**

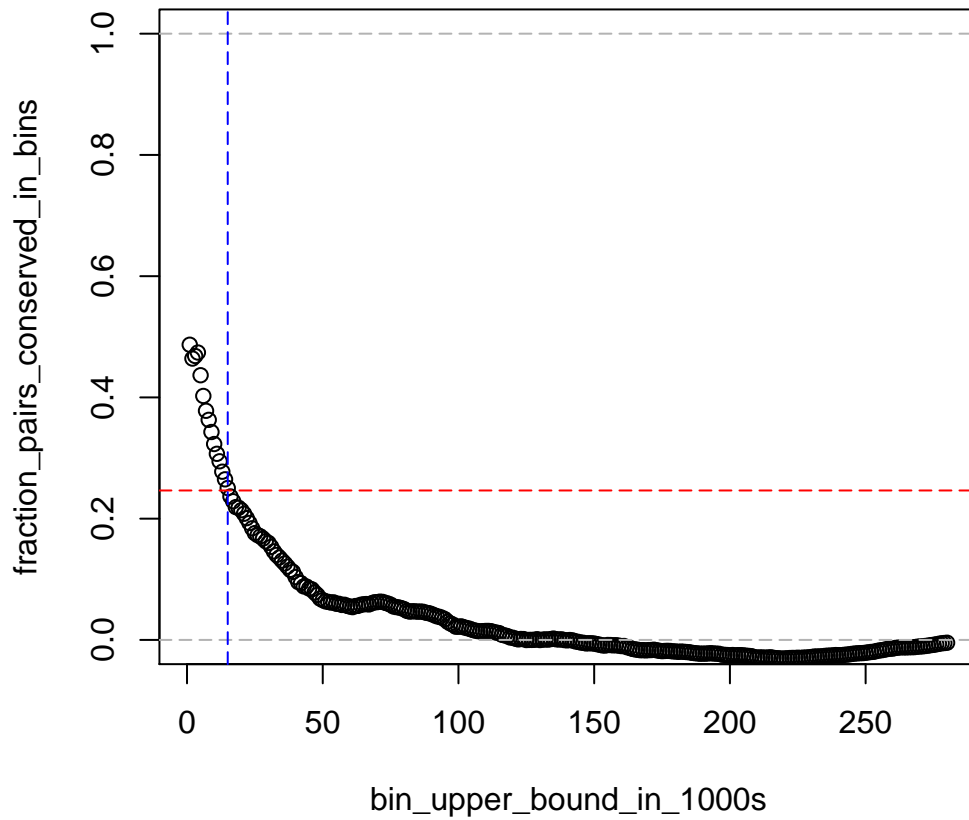

**Bin\_conservation\_minus\_bg\_MA-1E\_vs\_TN603.4.2**  
**PD-0.684334**

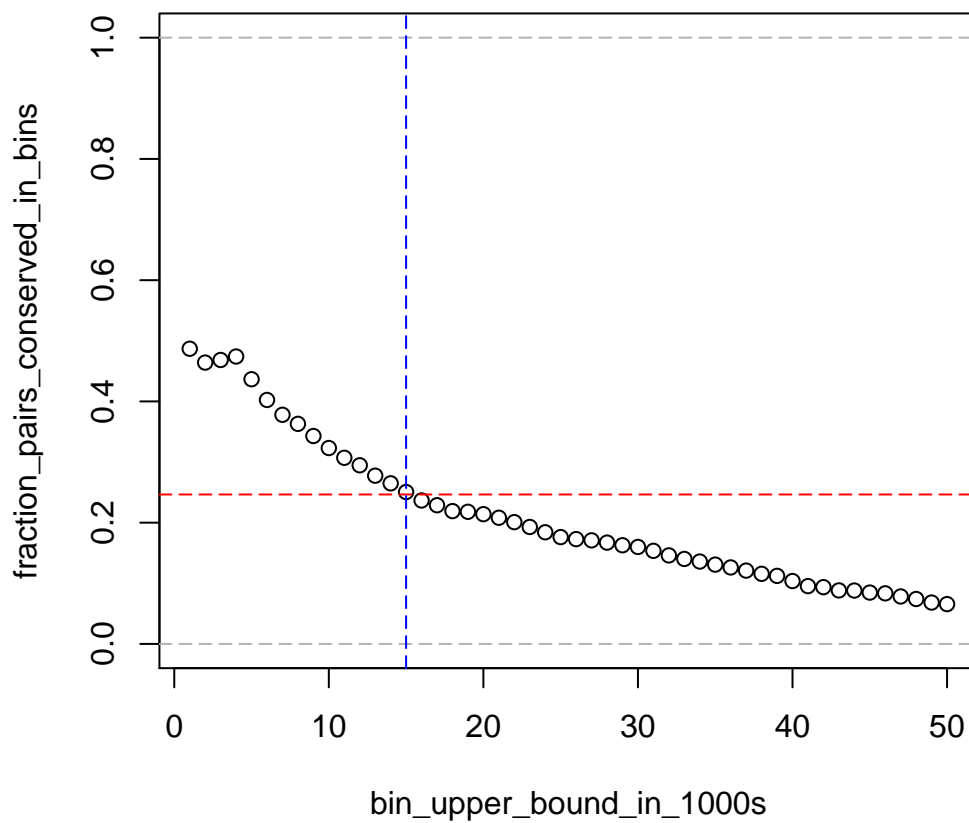

Supplement: s1 [file s1]

**Bin\_conservation\_minus\_bg\_AR158\_vs\_Can18-4**  
**PD-0.673088**

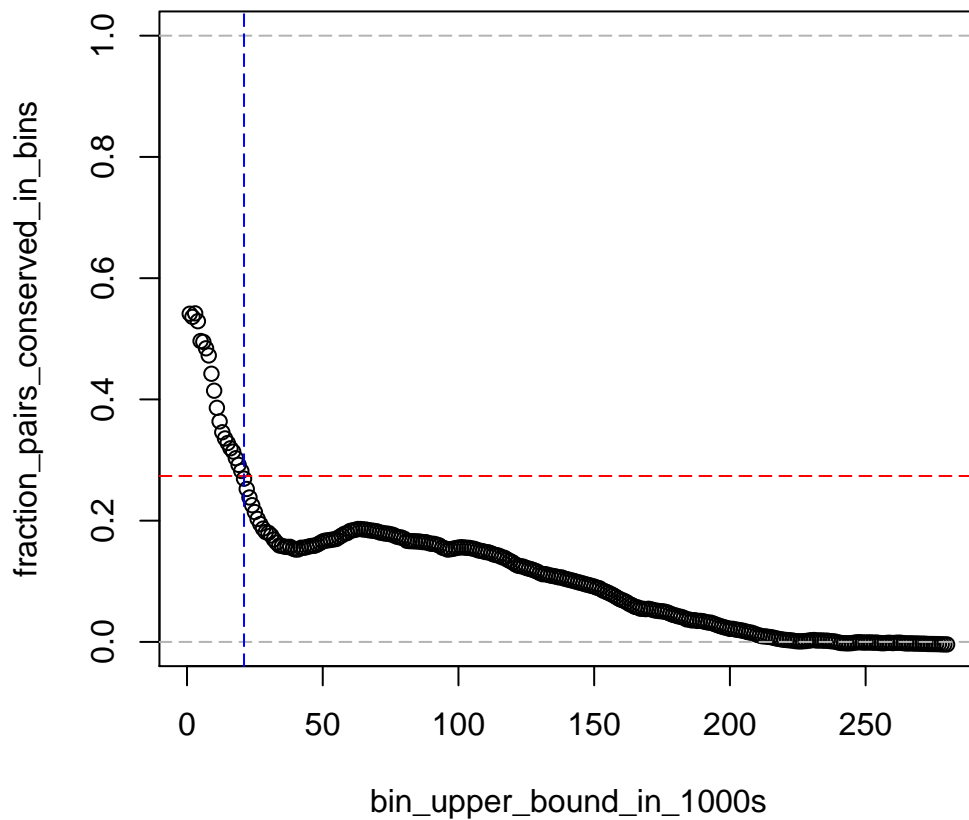

**Bin\_conservation\_minus\_bg\_AR158\_vs\_Can18-4**  
**PD-0.673088**

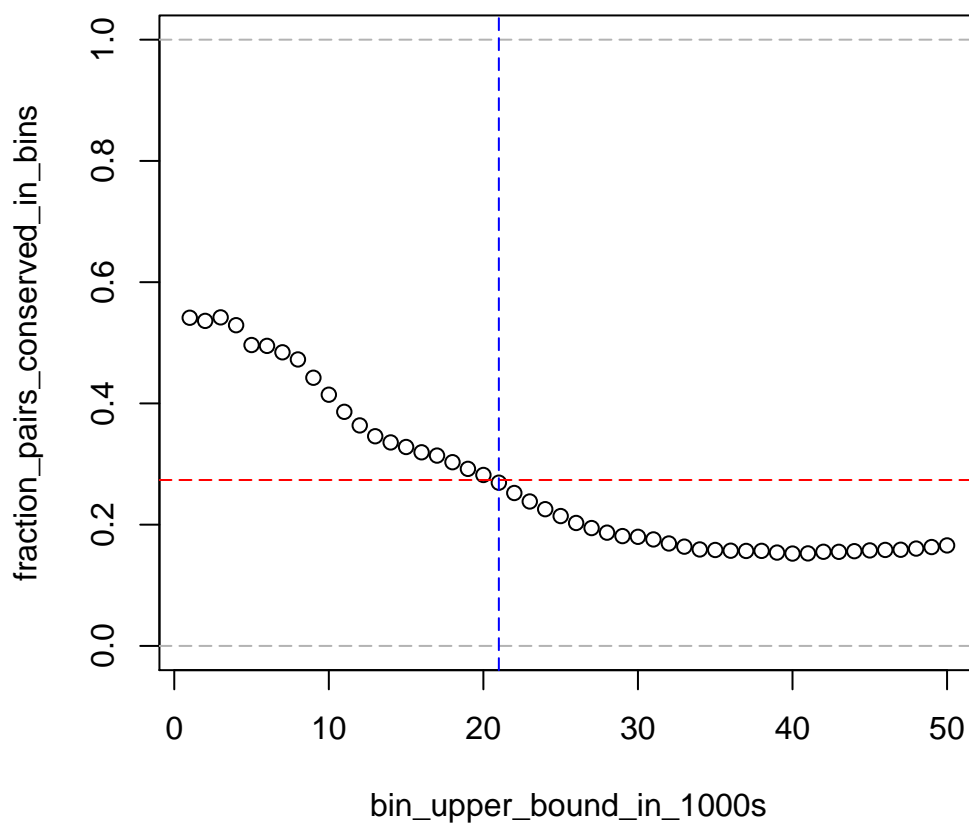

Supplement: s1 [file s1]

**Bin\_conservation\_minus\_bg\_Can0610SP\_vs\_NE-JV-4**  
**PD-0.681904**

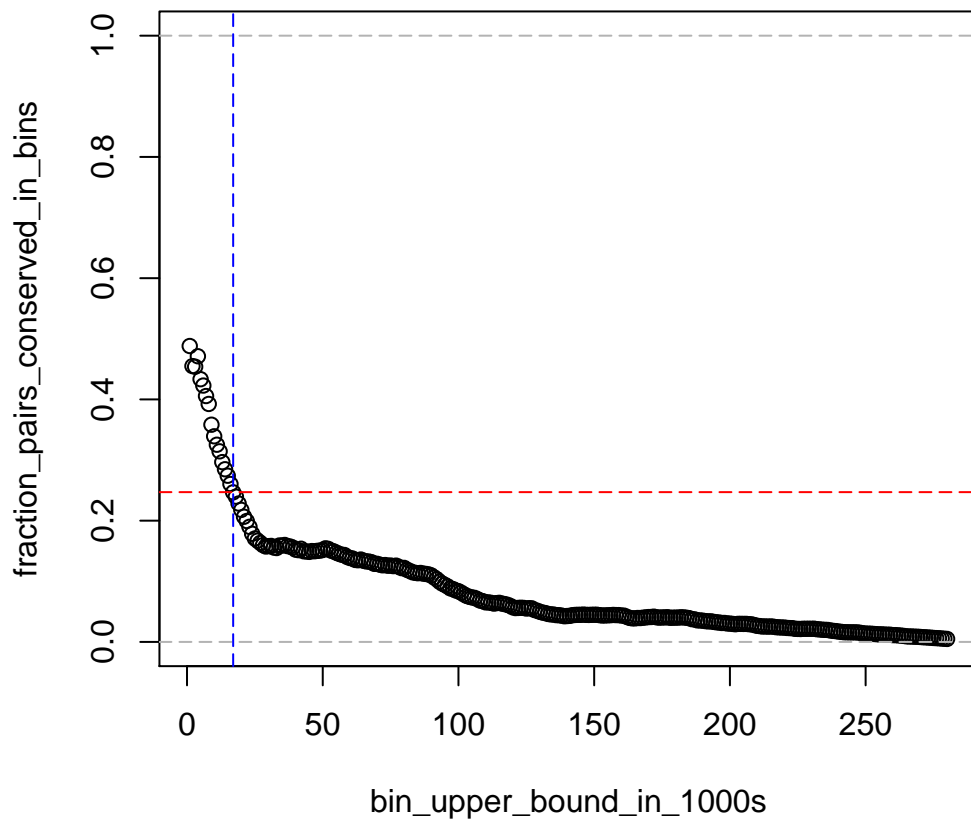

**Bin\_conservation\_minus\_bg\_Can0610SP\_vs\_NE-JV-4**  
**PD-0.681904**

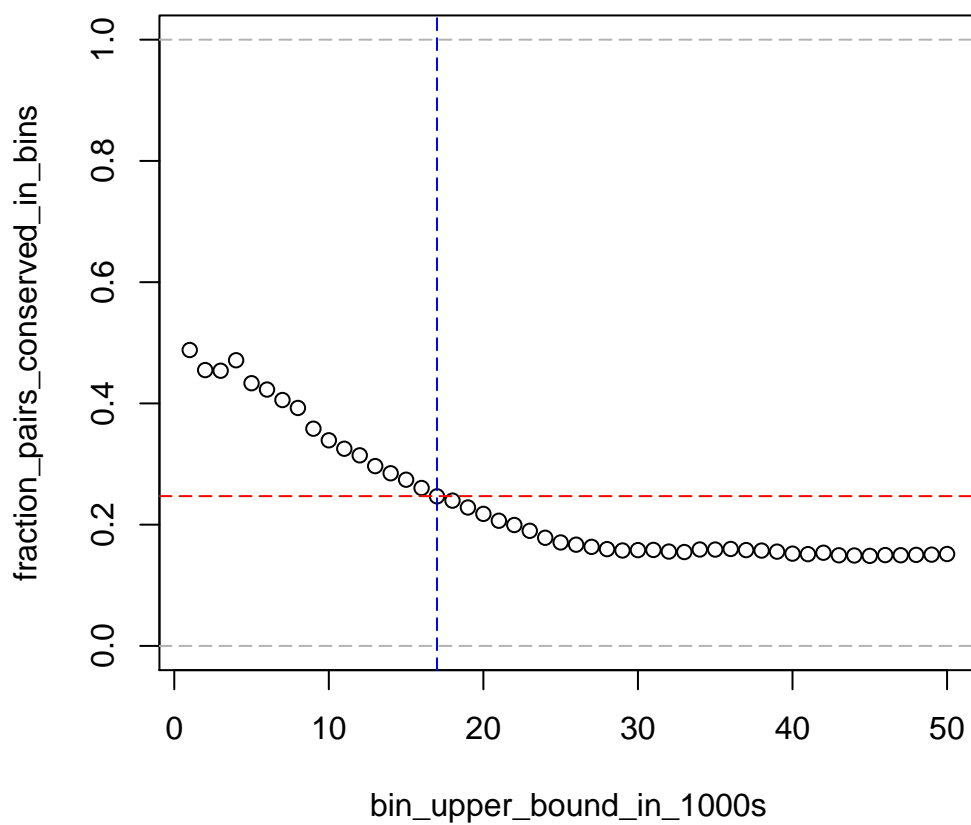

Supplement: s1 [file s1]

**Bin\_conservation\_minus\_bg\_NE-JV-1\_vs\_NW665.2**  
**PD-0.360648**

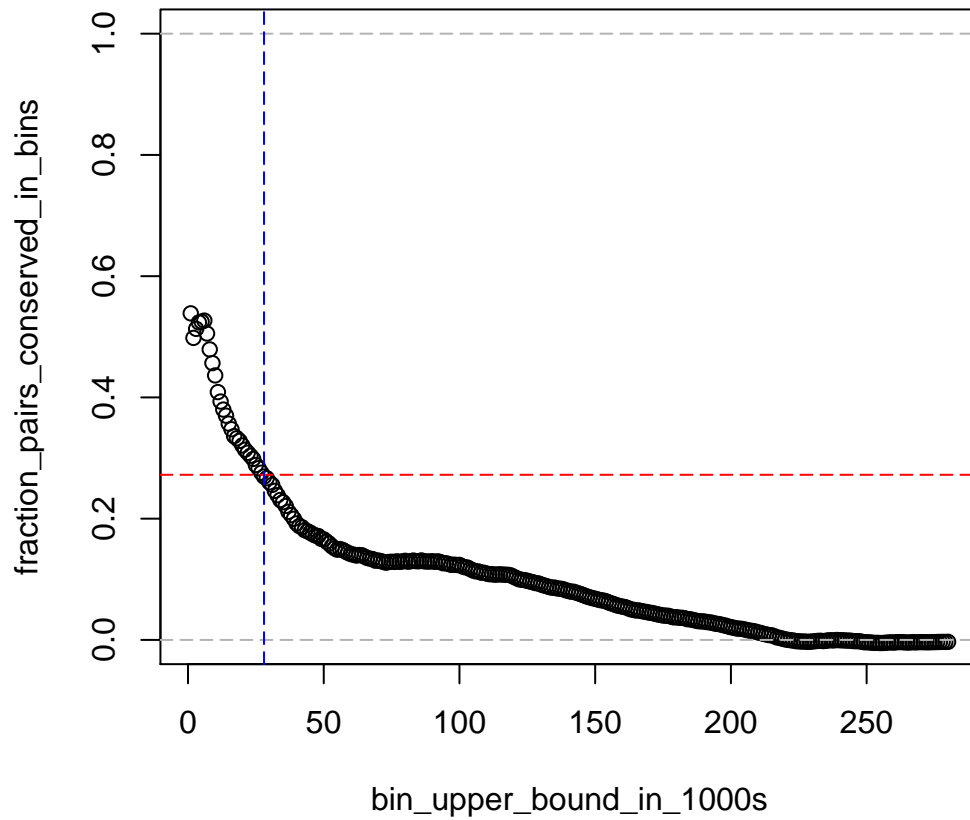

**Bin\_conservation\_minus\_bg\_NE-JV-1\_vs\_NW665.2**  
**PD-0.360648**

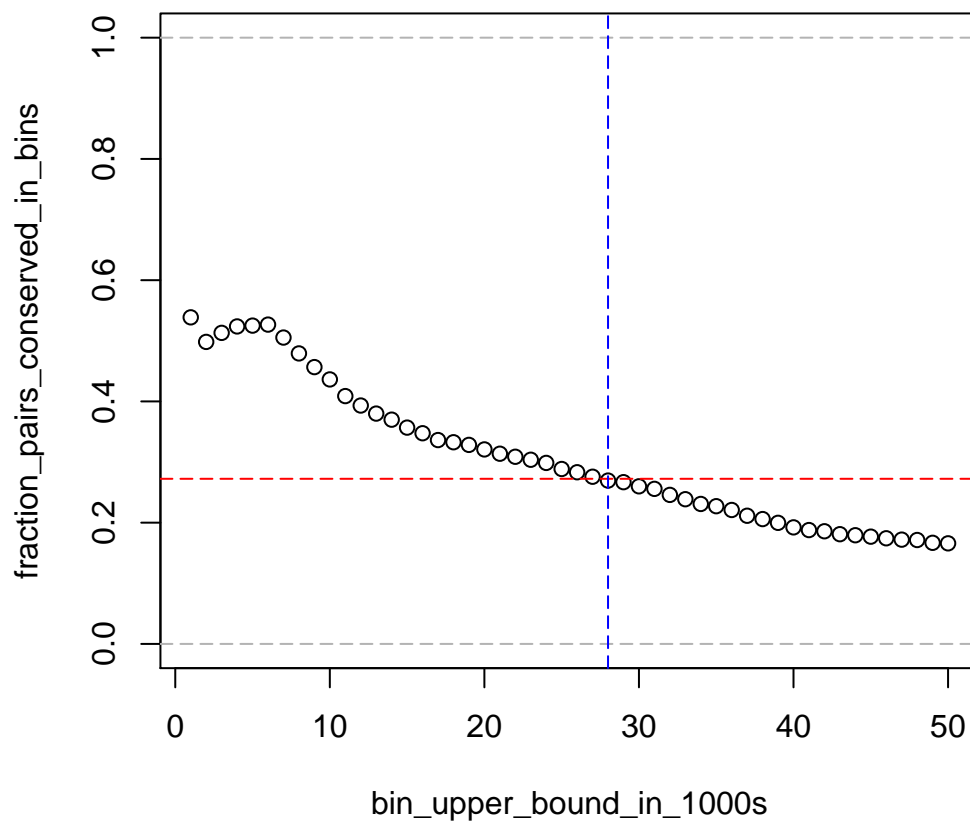

Supplement: s1 [file s1]

**Bin\_conservation\_minus\_bg\_OR0704.2.2\_vs\_TN603.4.2**  
**PD-0.449044**

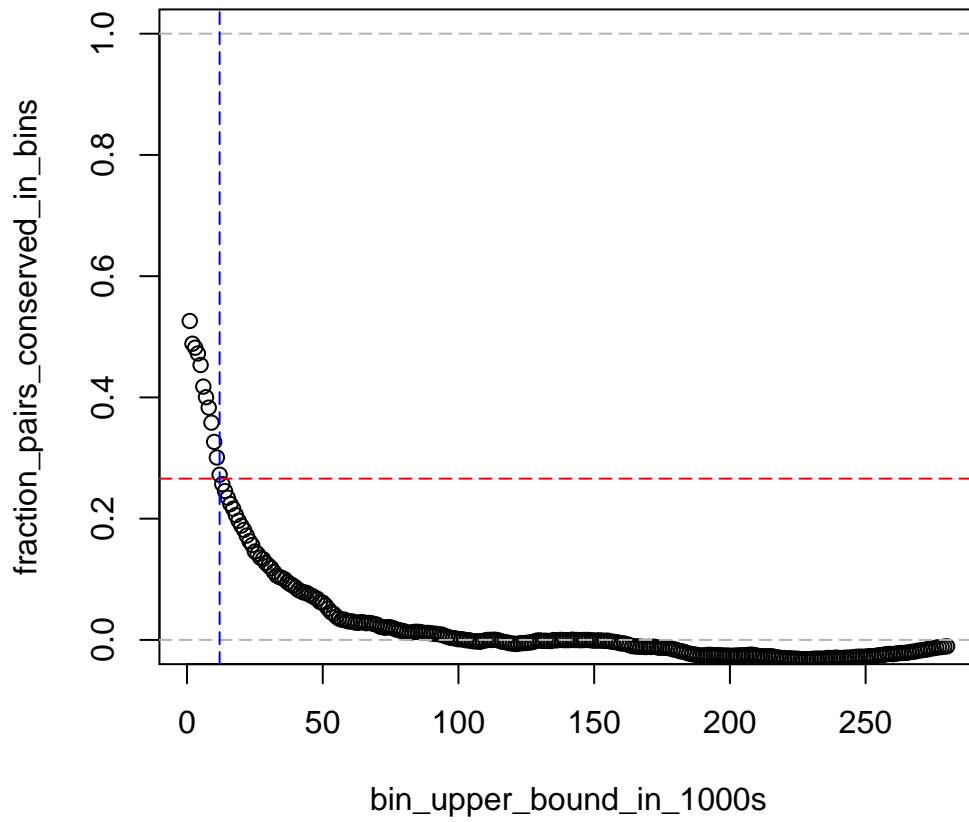

**Bin\_conservation\_minus\_bg\_OR0704.2.2\_vs\_TN603.4.2**  
**PD-0.449044**

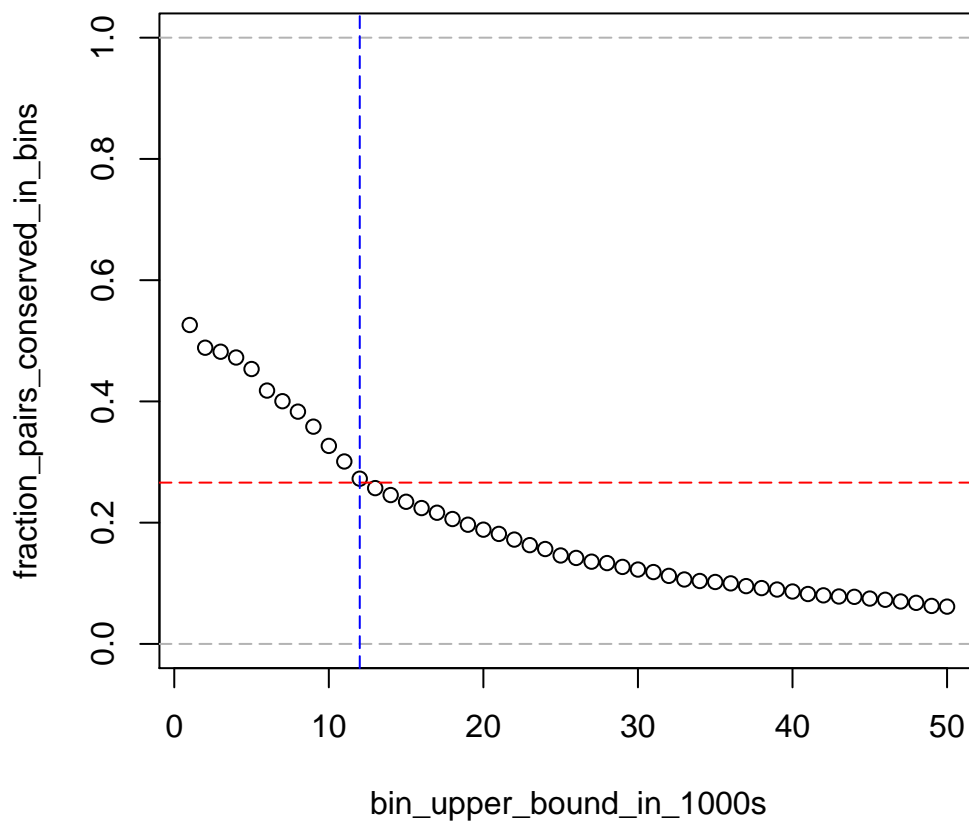

Supplement: s1 [file s1]

**Bin\_conservation\_minus\_bg\_Br0604L\_vs\_CVB-1**  
**PD-0.465153**

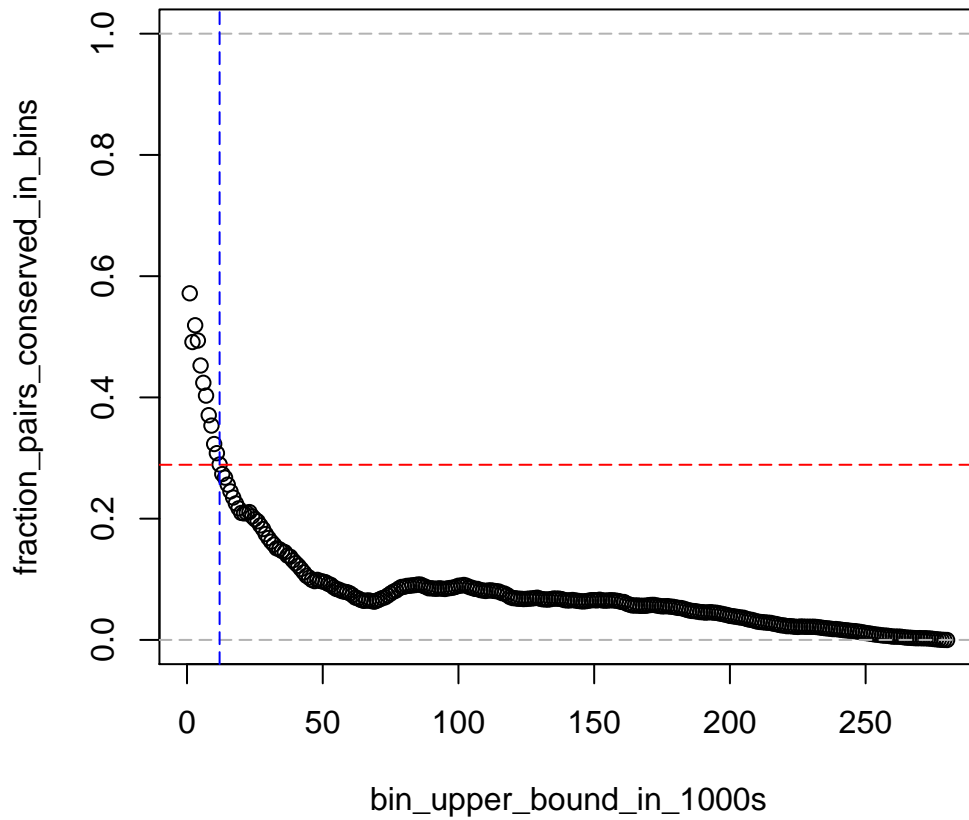

**Bin\_conservation\_minus\_bg\_Br0604L\_vs\_CVB-1**  
**PD-0.465153**

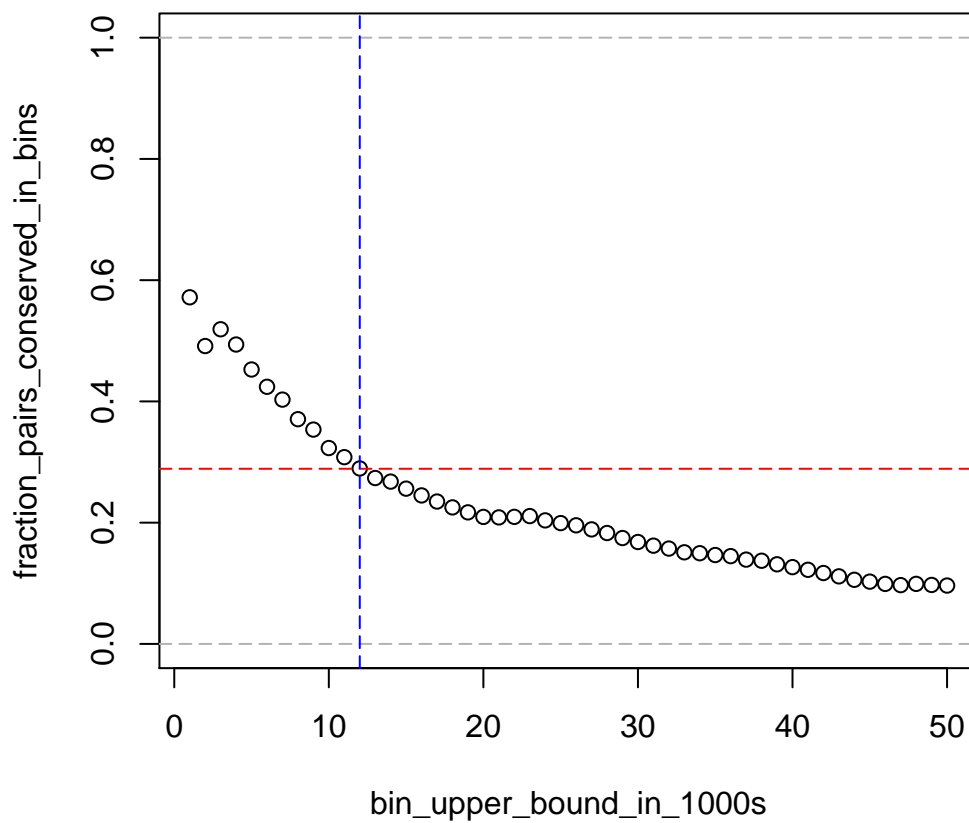

Supplement: s1 [file s1]

**Bin\_conservation\_minus\_bg\_Can0610SP\_vs\_OR0704.2.**  
**PD-0.459632**

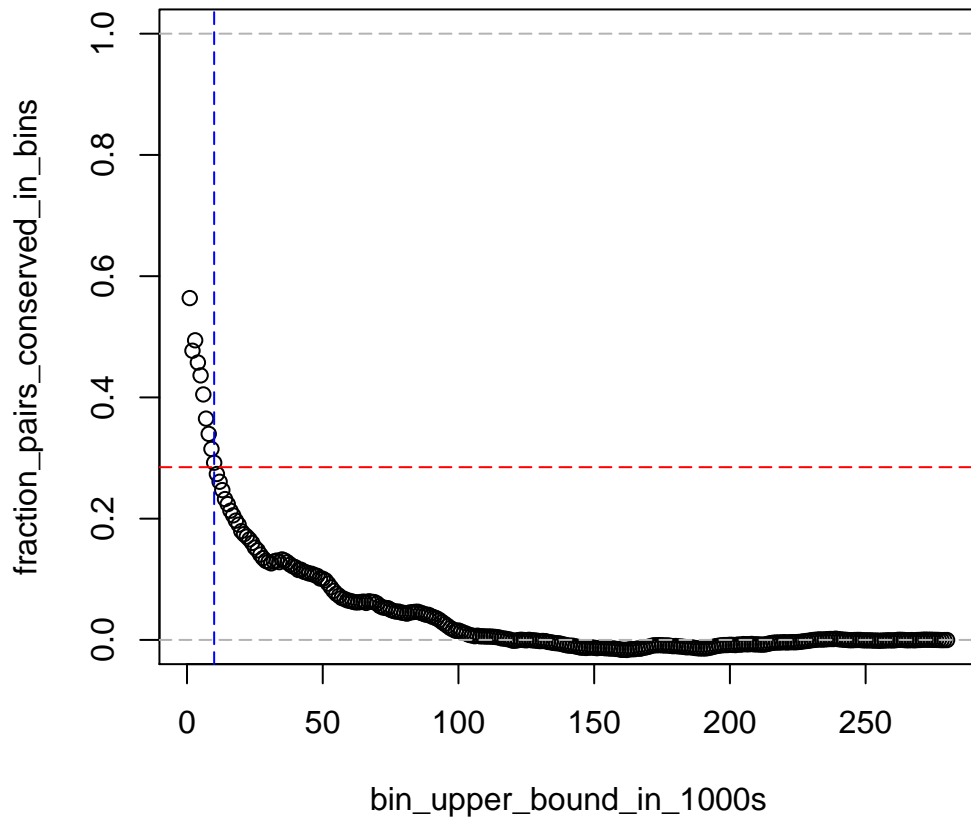

**Bin\_conservation\_minus\_bg\_Can0610SP\_vs\_OR0704.2.**  
**PD-0.459632**

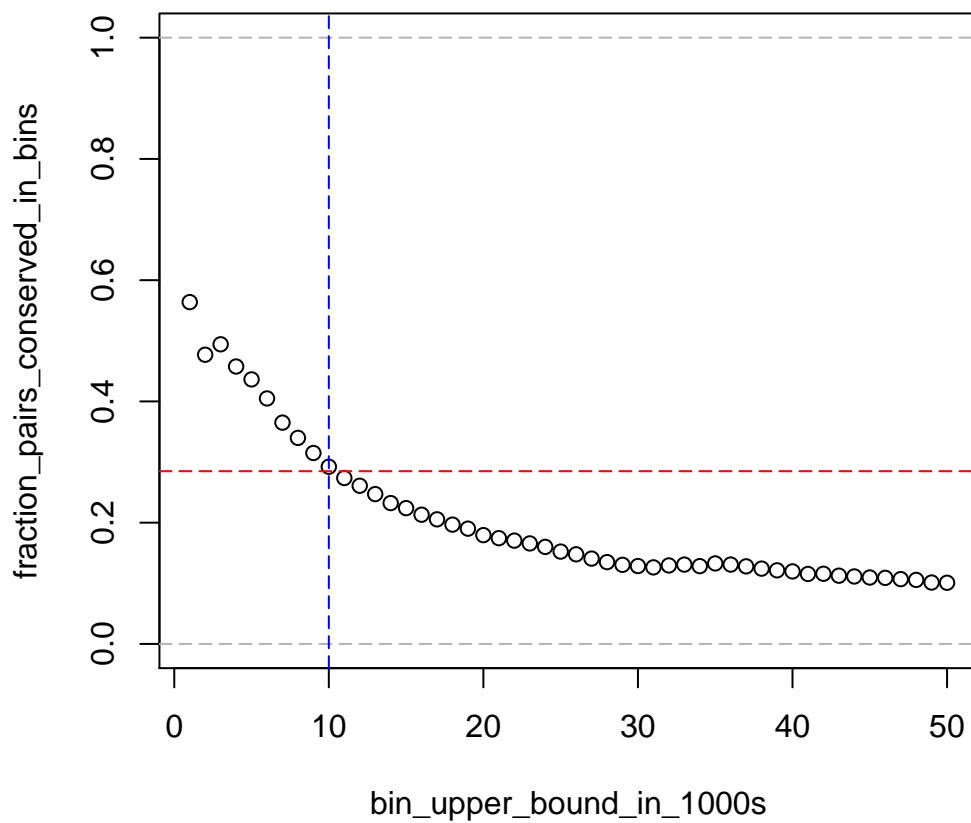

Supplement: s1 [file s1]

**Bin\_conservation\_minus\_bg\_CVR-1\_vs\_PBCV1**  
**PD-0.632272**

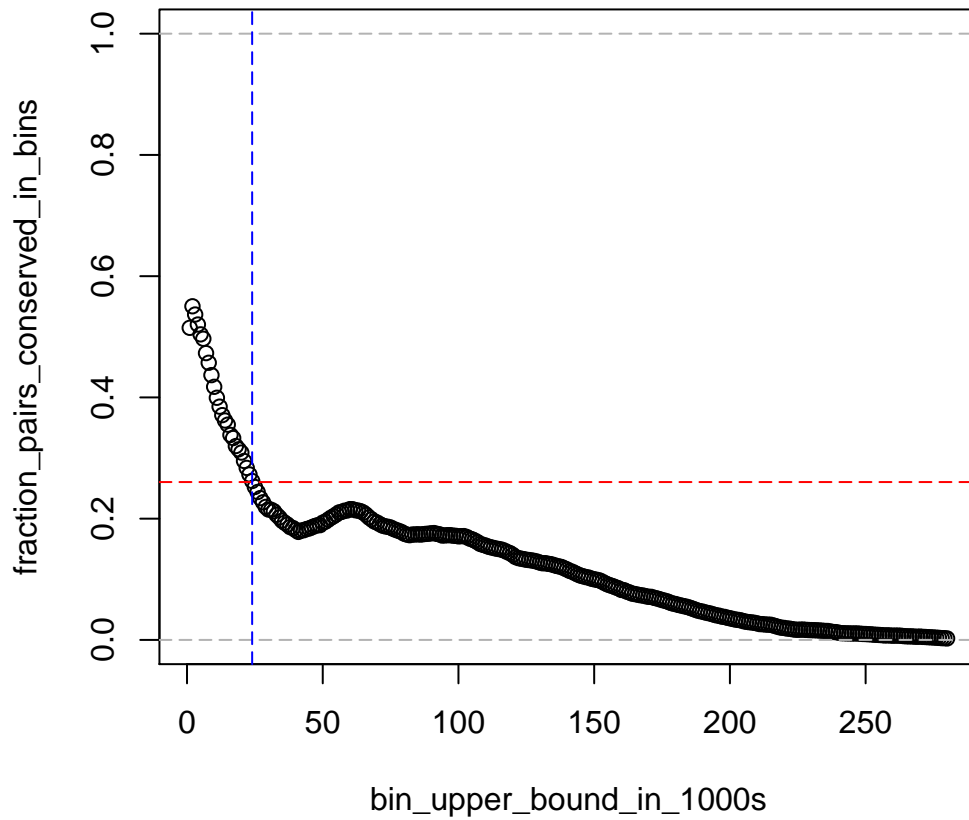

**Bin\_conservation\_minus\_bg\_CVR-1\_vs\_PBCV1**  
**PD-0.632272**

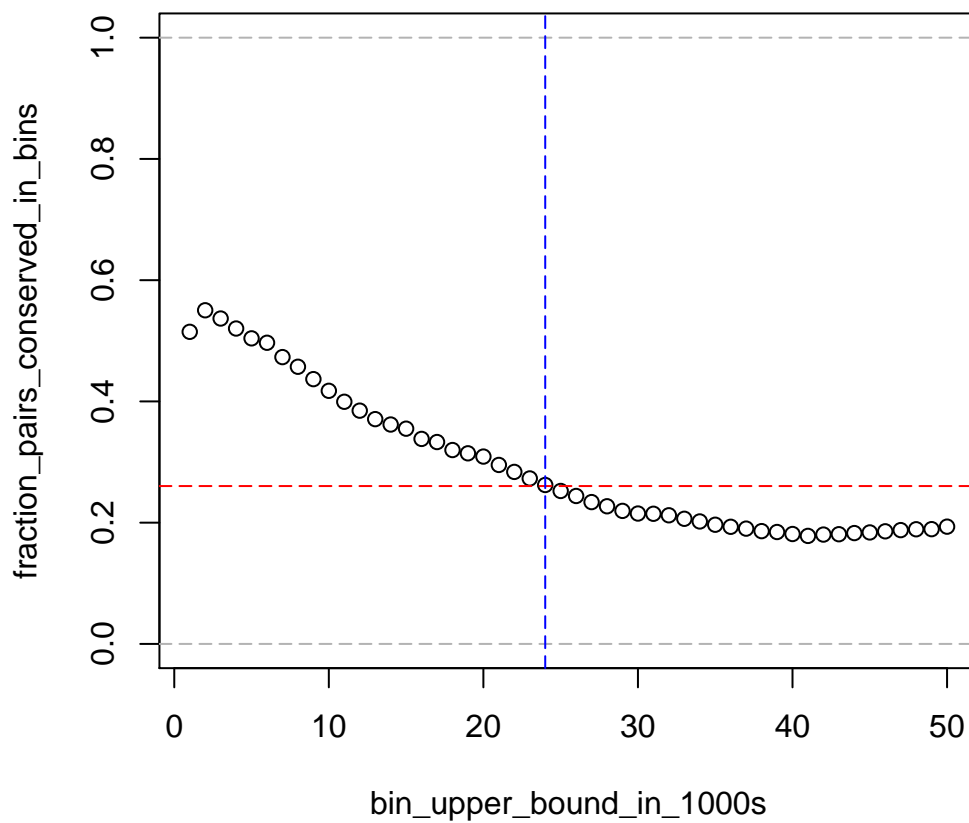

Supplement: s1 [file s1]

**Bin\_conservation\_minus\_bg\_CviKI\_vs\_GM0701.1**  
**PD-0.683284**

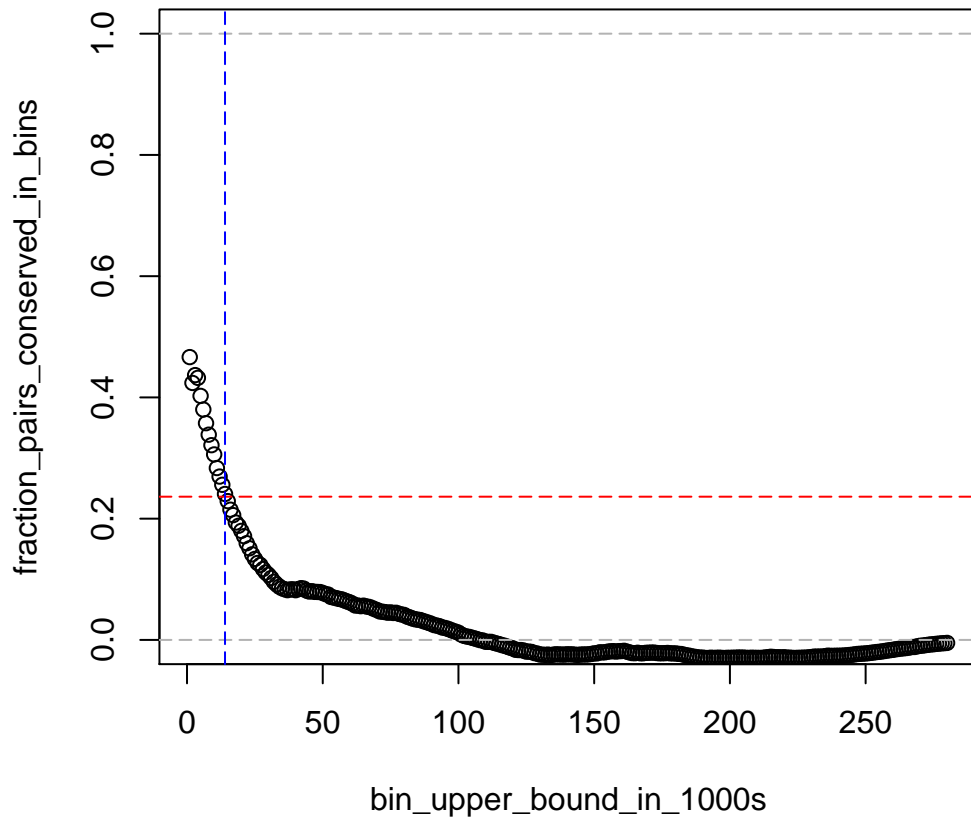

**Bin\_conservation\_minus\_bg\_CviKI\_vs\_GM0701.1**  
**PD-0.683284**

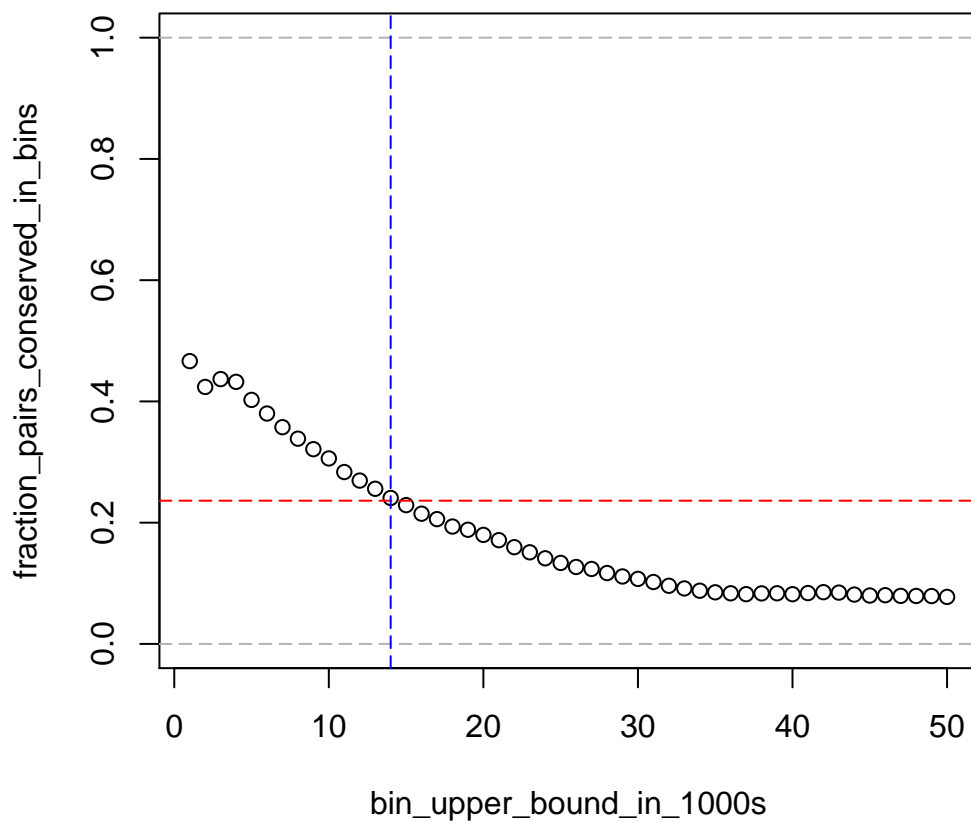

Supplement: s1 [file s1]

**Bin\_conservation\_minus\_bg\_AR158\_vs\_NW665.2**  
**PD-0.666547**

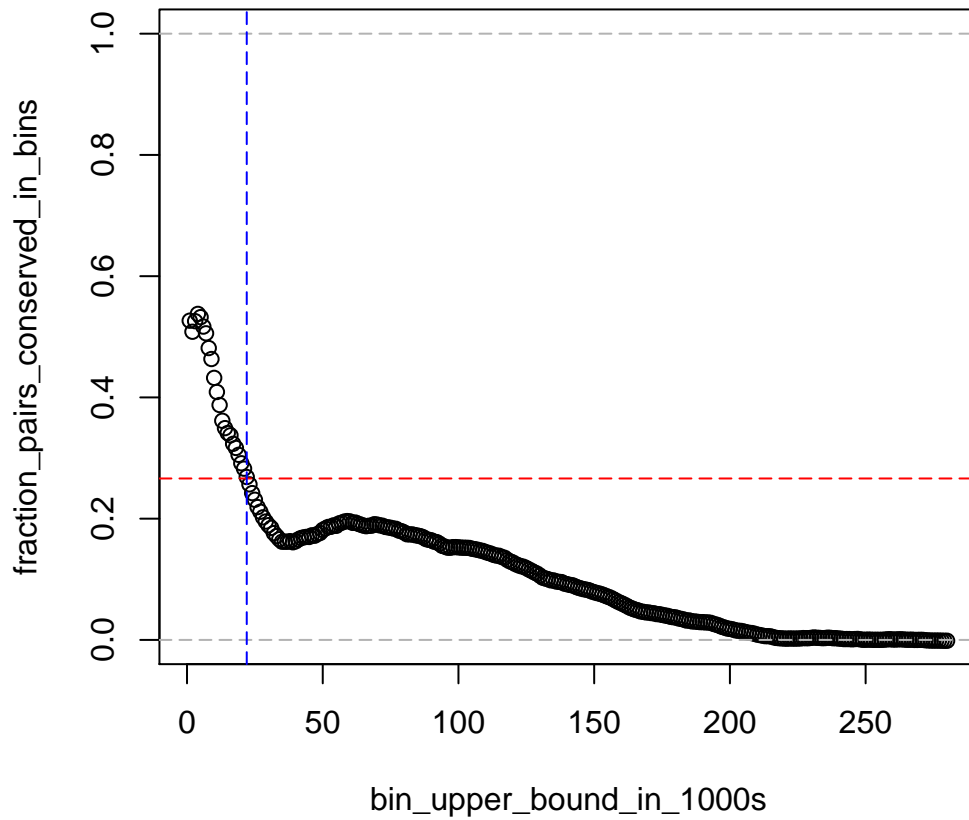

**Bin\_conservation\_minus\_bg\_AR158\_vs\_NW665.2**  
**PD-0.666547**

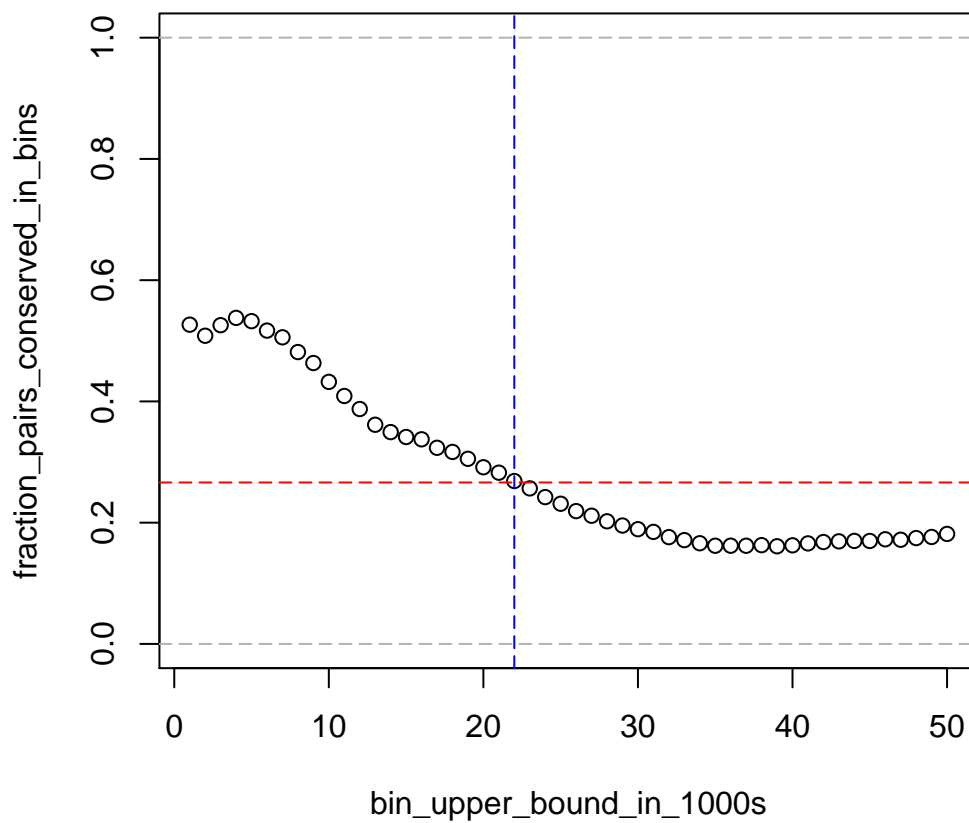

Supplement: s1 [file s1]

**Bin\_conservation\_minus\_bg\_AR158\_vs\_CVG-1**  
**PD-0.665159**

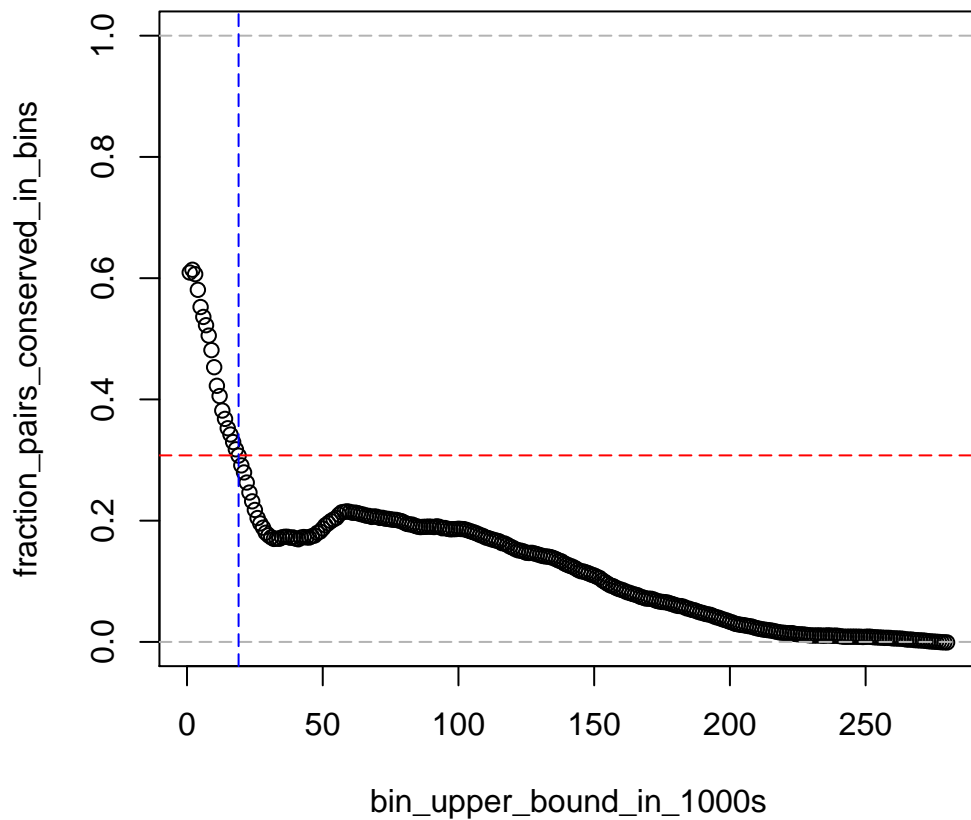

**Bin\_conservation\_minus\_bg\_AR158\_vs\_CVG-1**  
**PD-0.665159**

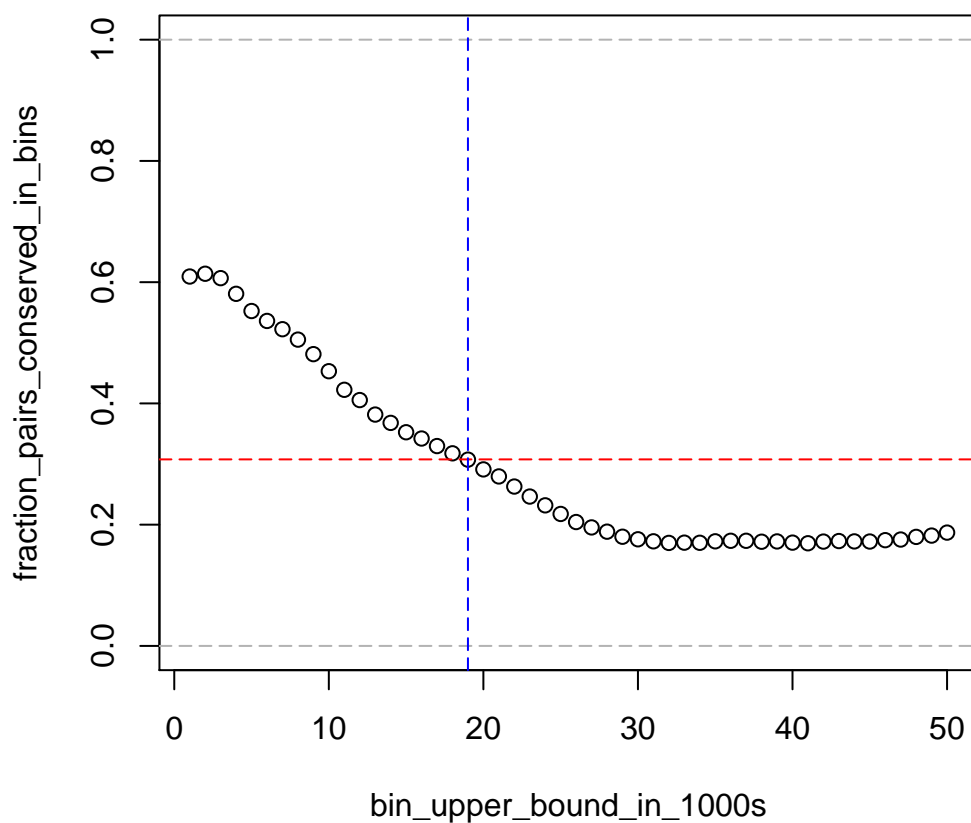

Supplement: s1 [file s1]

**Bin\_conservation\_minus\_bg\_MO0605SPH\_vs\_OR0704.2**  
**PD-0.462901**

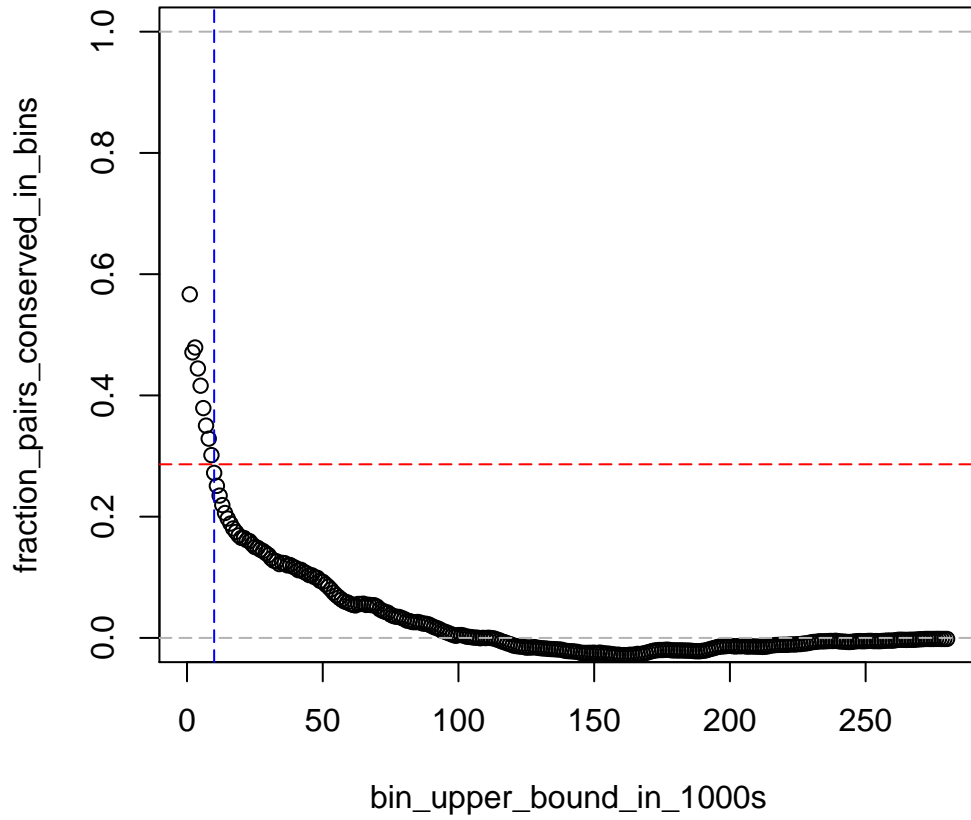

**Bin\_conservation\_minus\_bg\_MO0605SPH\_vs\_OR0704.2**  
**PD-0.462901**

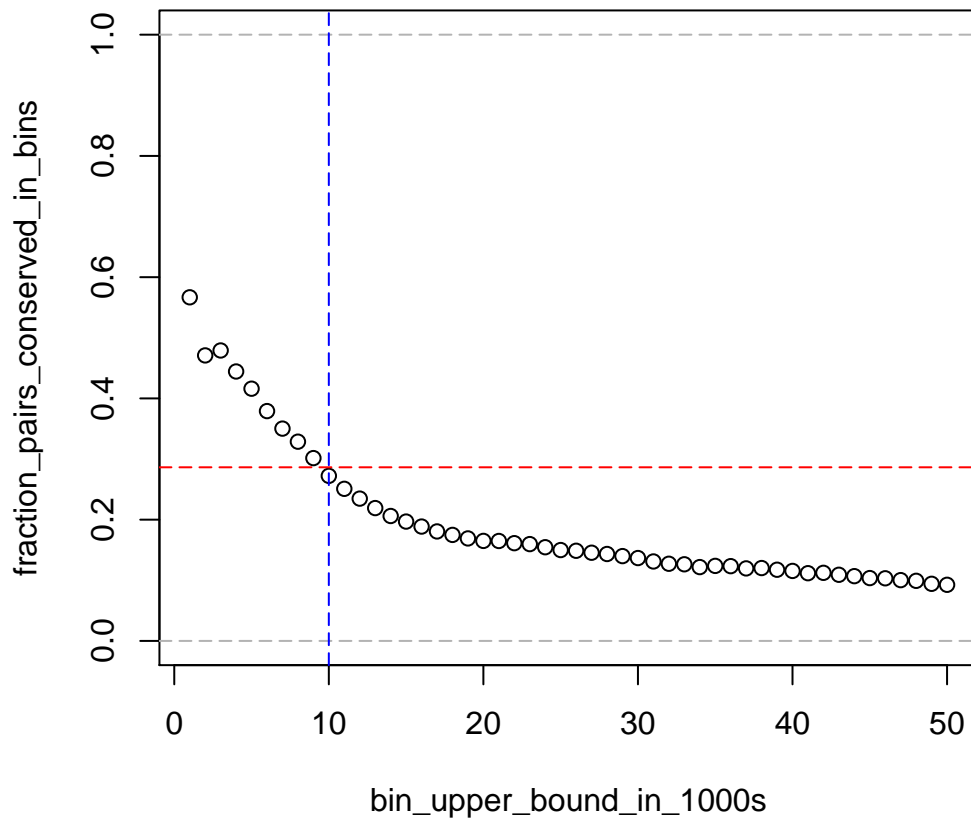

Supplement: s1 [file s1]

**Bin\_conservation\_minus\_bg\_NE-JV-4\_vs\_NY2A**  
**PD-0.142249**

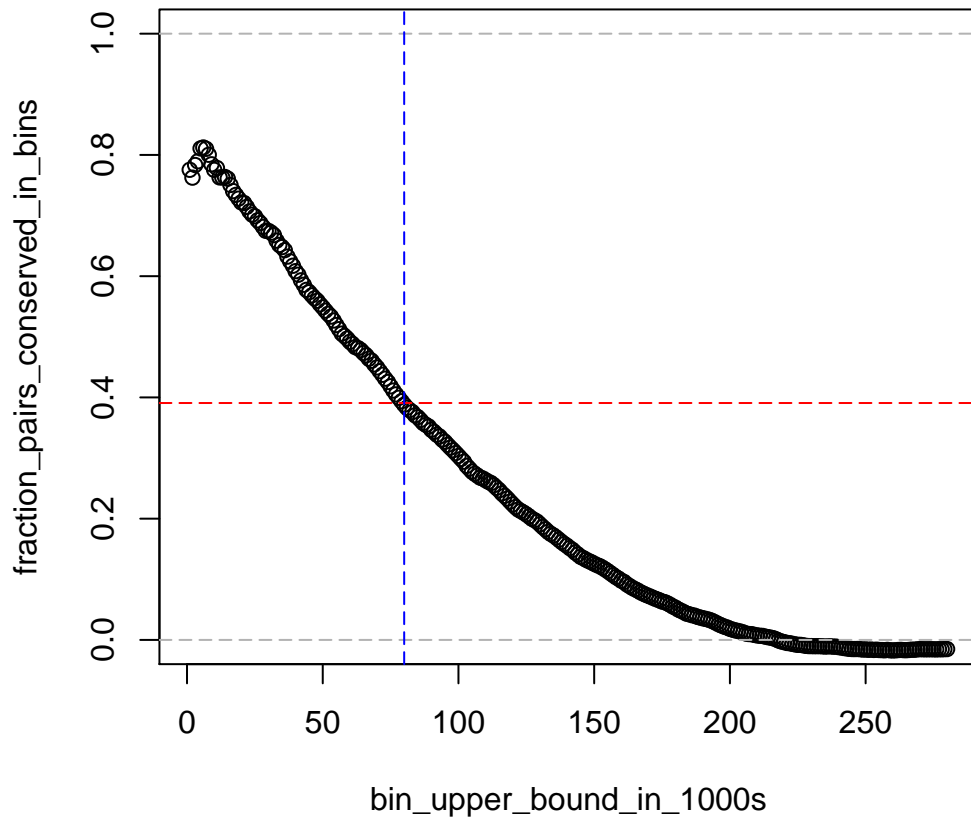

**Bin\_conservation\_minus\_bg\_NE-JV-4\_vs\_NY2A**  
**PD-0.142249**

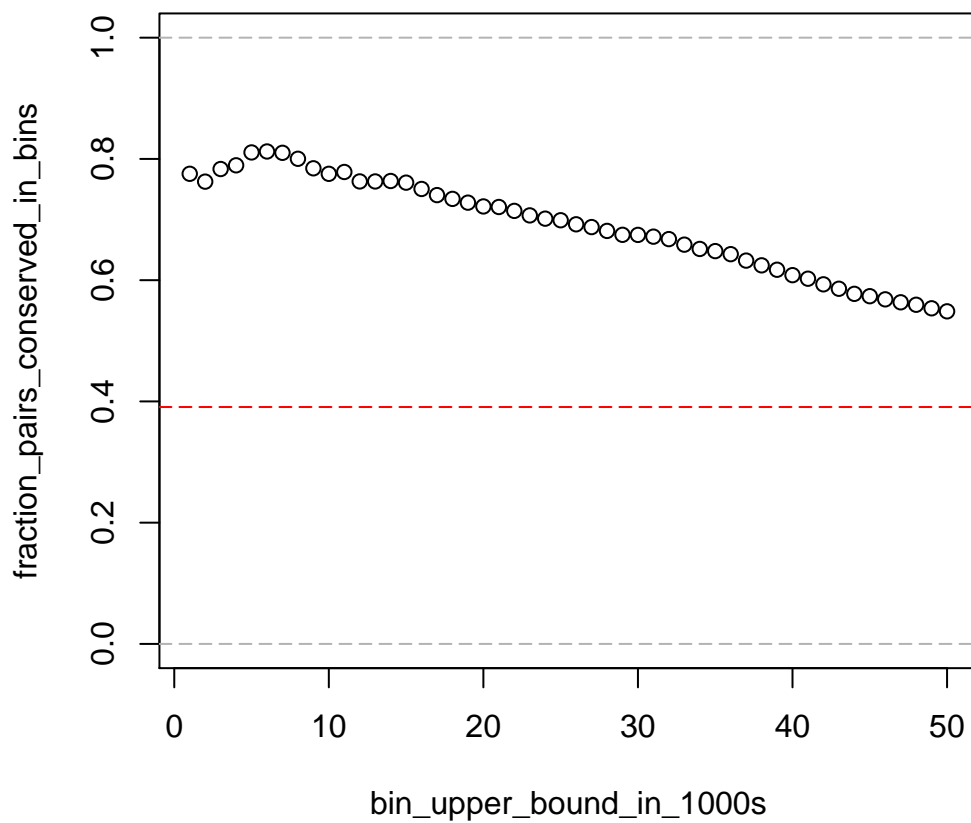

Supplement: s1 [file s1]

**Bin\_conservation\_minus\_bg\_Canal-1\_vs\_MT325**  
**PD-0.459632**

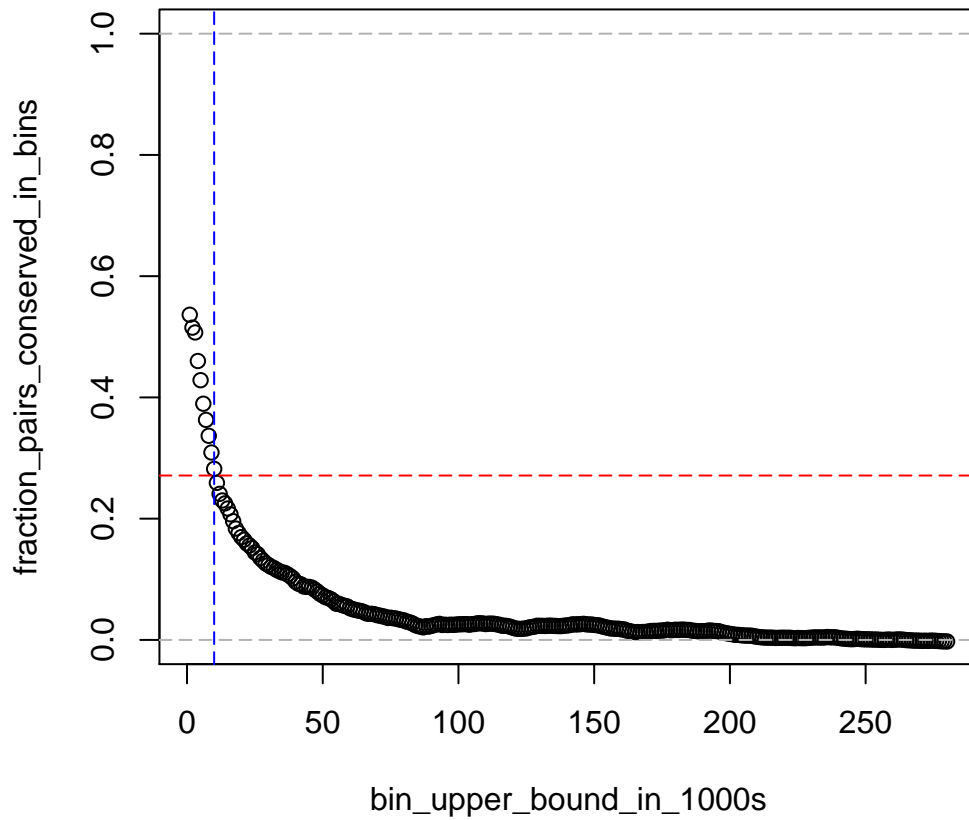

**Bin\_conservation\_minus\_bg\_Canal-1\_vs\_MT325**  
**PD-0.459632**

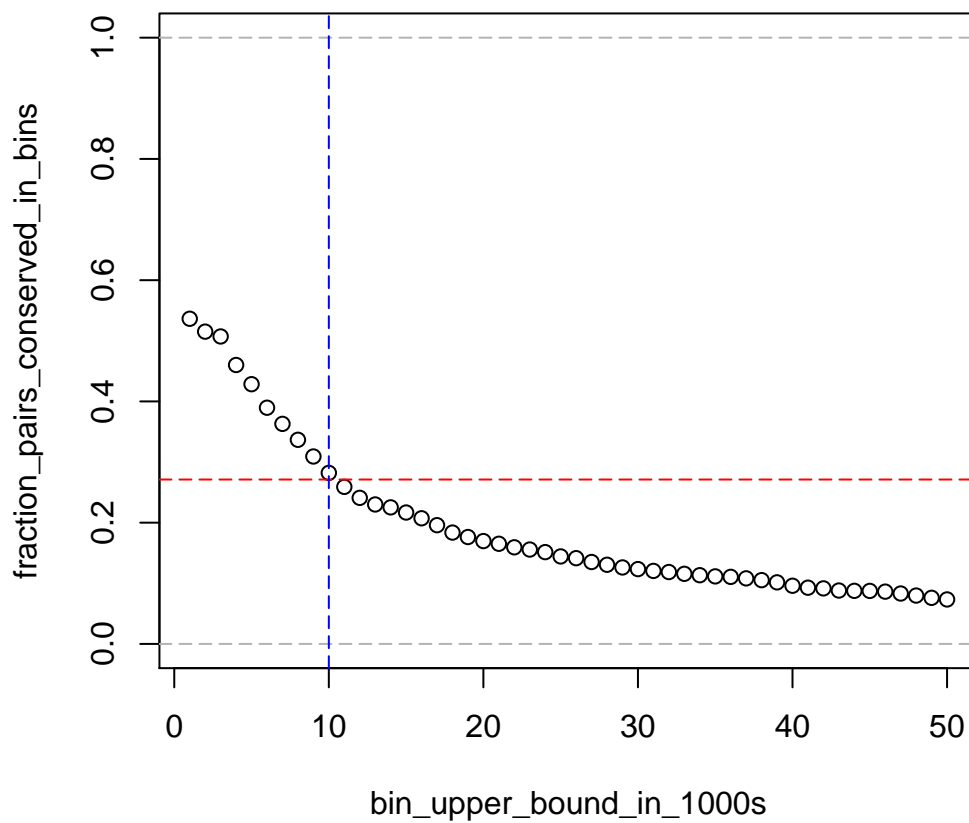

Supplement: s1 [file s1]

**Bin\_conservation\_minus\_bg\_CVA-1\_vs\_MA-1E**  
**PD-0.650193**

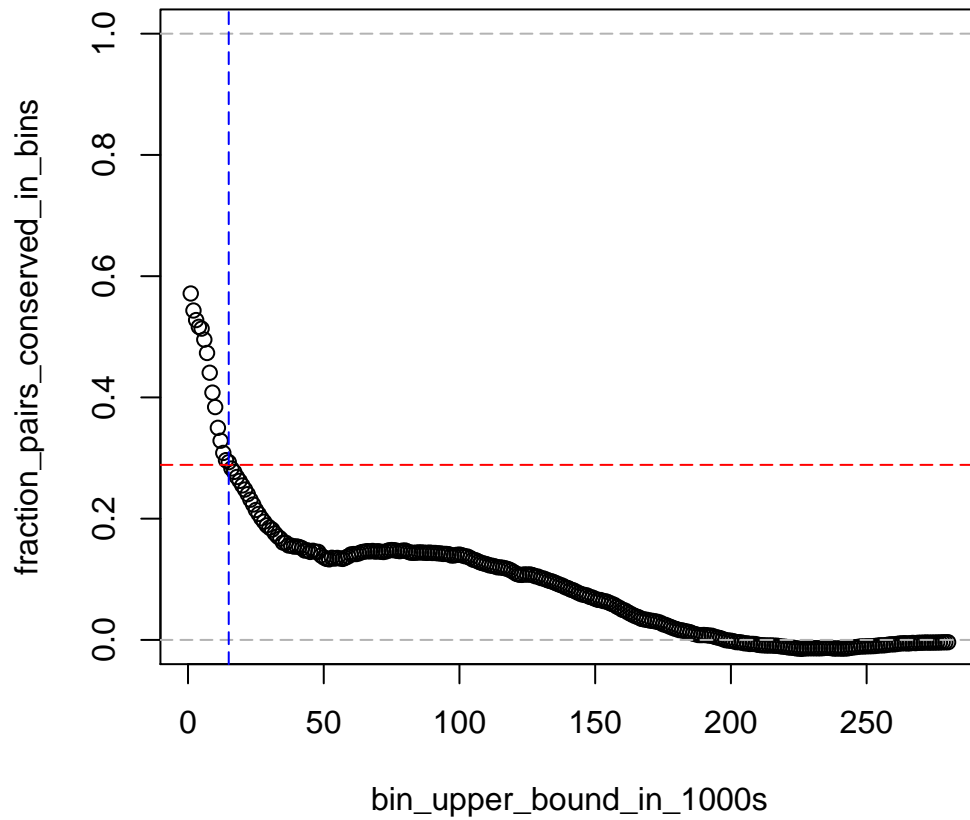

**Bin\_conservation\_minus\_bg\_CVA-1\_vs\_MA-1E**  
**PD-0.650193**

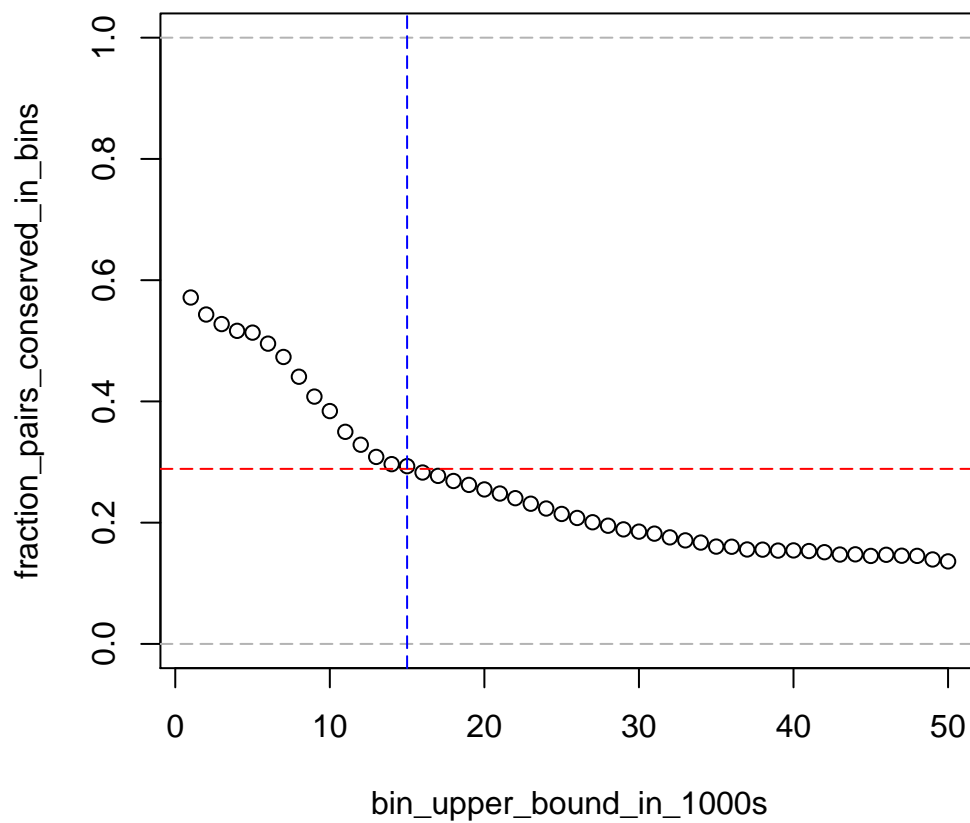

Supplement: s1 [file s1]

**Bin\_conservation\_minus\_bg\_CZ-2\_vs\_MO0605SPH**  
**PD-0.468538**

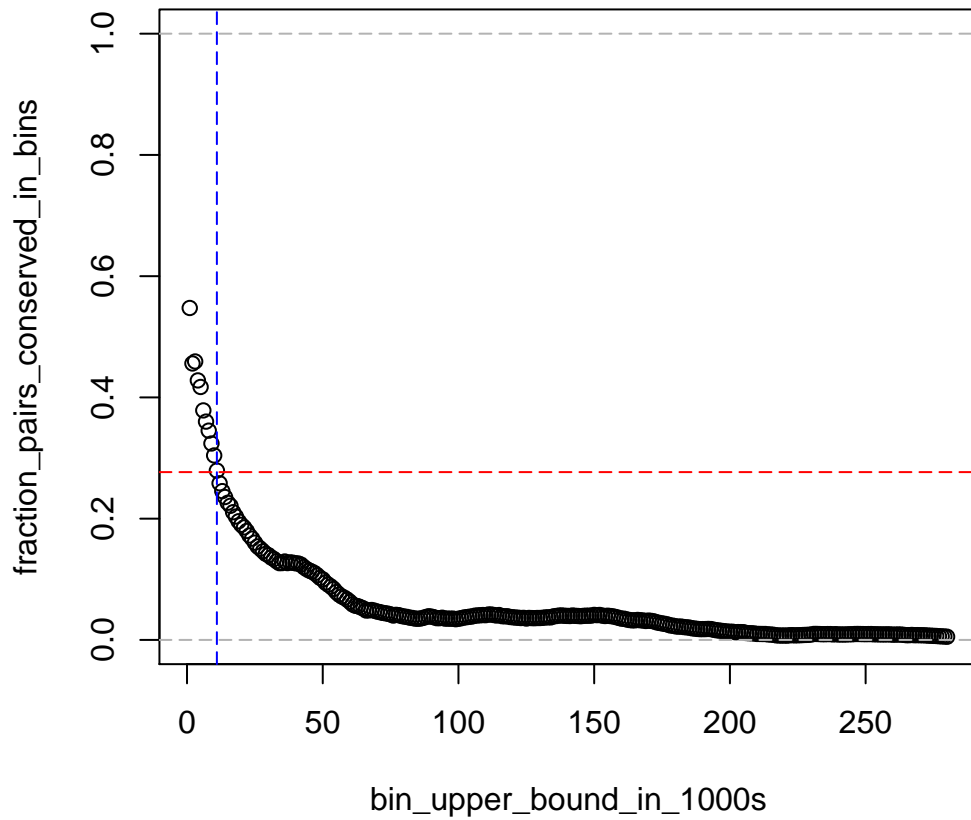

**Bin\_conservation\_minus\_bg\_CZ-2\_vs\_MO0605SPH**  
**PD-0.468538**

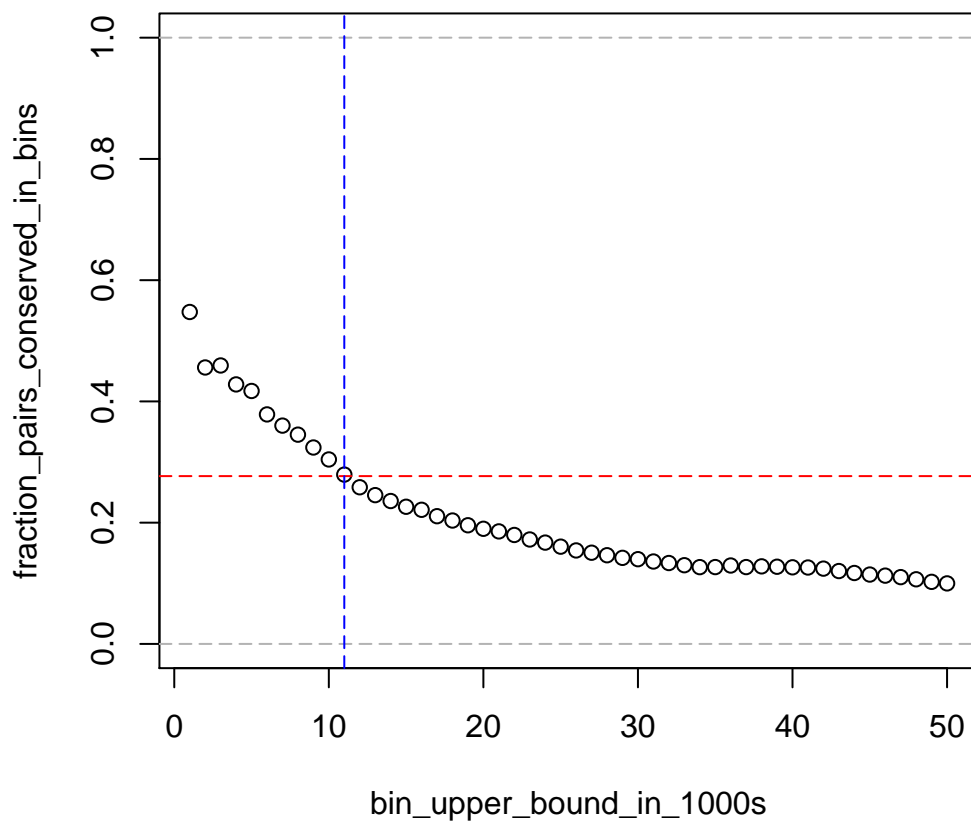

Supplement: s1 [file s1]

**Bin\_conservation\_minus\_bg\_CVR-1\_vs\_TN603.4.2**  
**PD-0.447265**

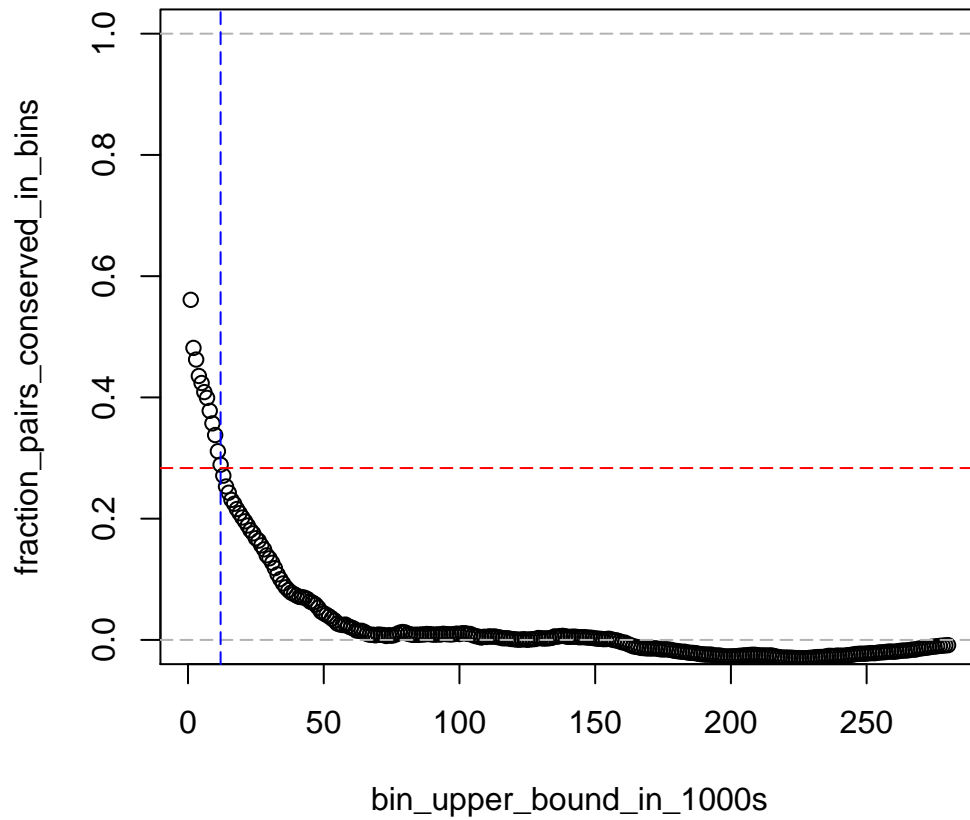

**Bin\_conservation\_minus\_bg\_CVR-1\_vs\_TN603.4.2**  
**PD-0.447265**

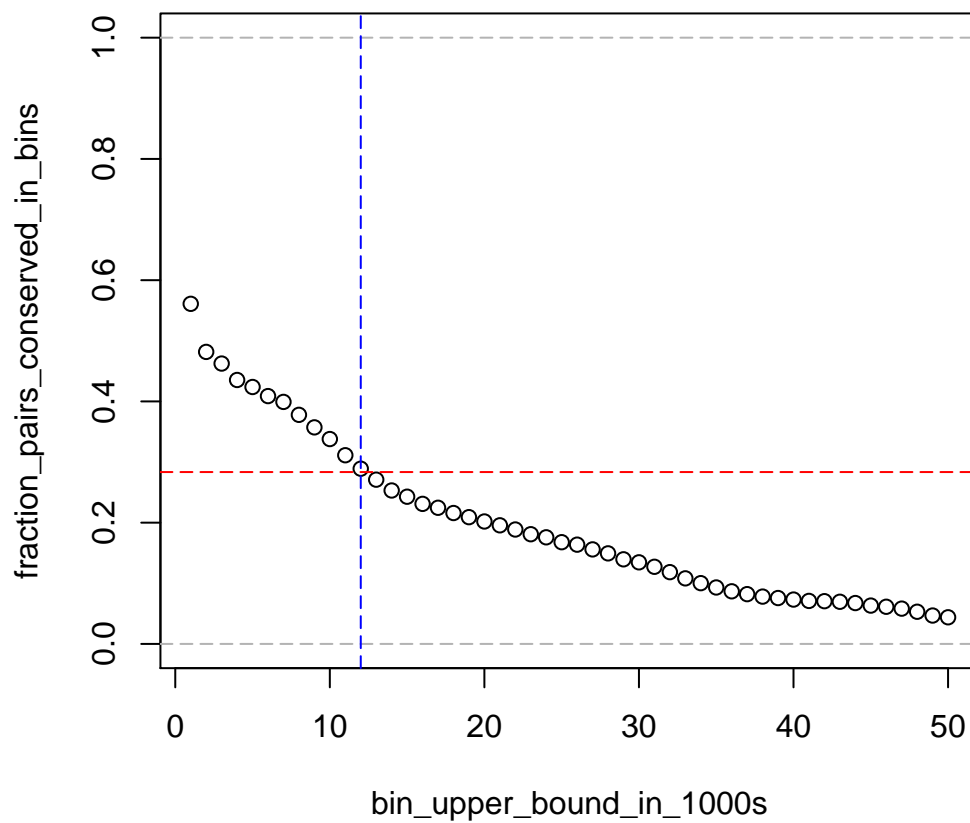

Supplement: s1 [file s1]

**Bin\_conservation\_minus\_bg\_CVA-1\_vs\_Fr5L**  
**PD-0.033403**

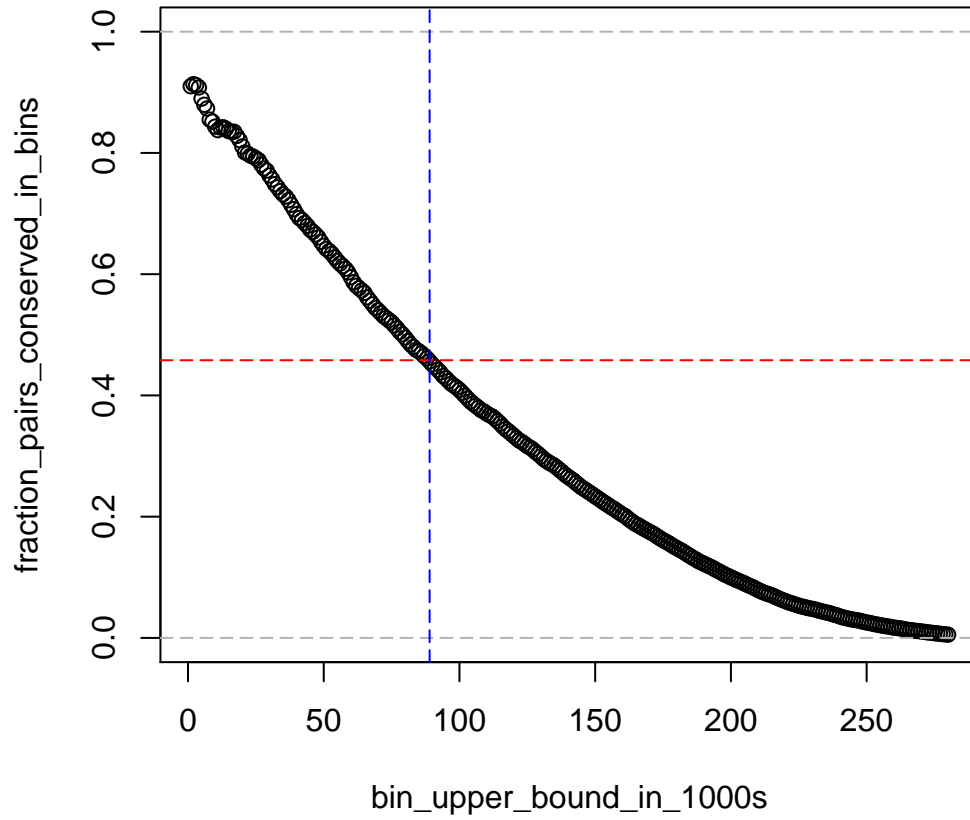

**Bin\_conservation\_minus\_bg\_CVA-1\_vs\_Fr5L**  
**PD-0.033403**

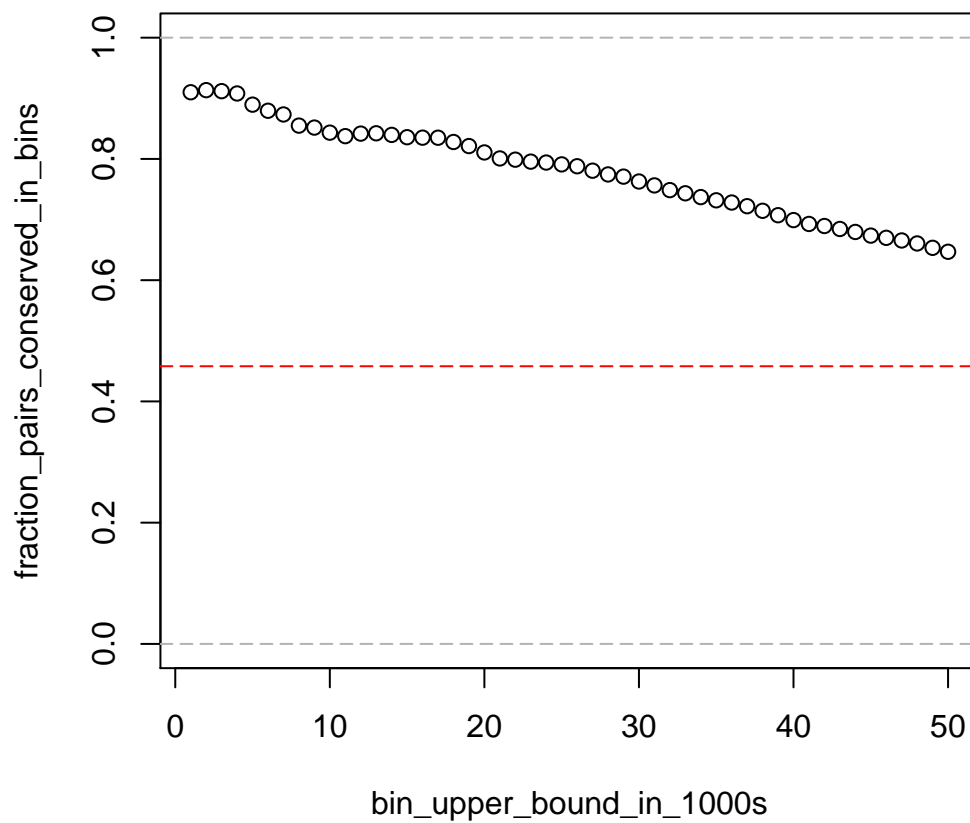

Supplement: s1 [file s1]

**Bin\_conservation\_minus\_bg\_AR158\_vs\_CviKI**  
**PD-0.149664**

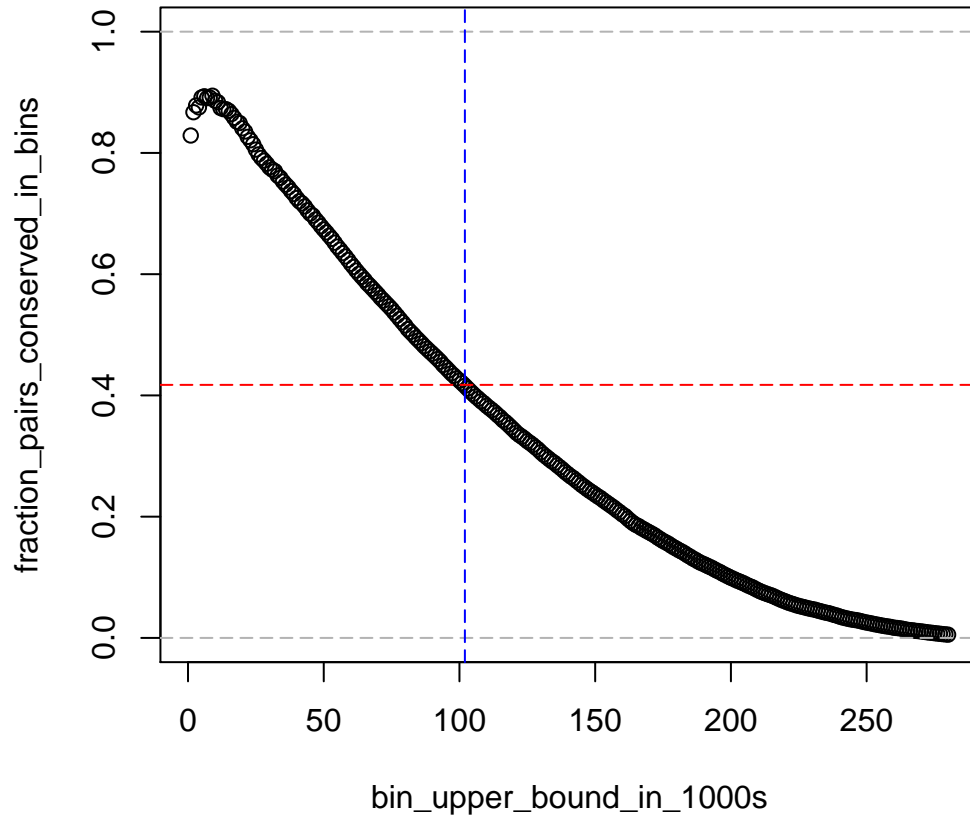

**Bin\_conservation\_minus\_bg\_AR158\_vs\_CviKI**  
**PD-0.149664**

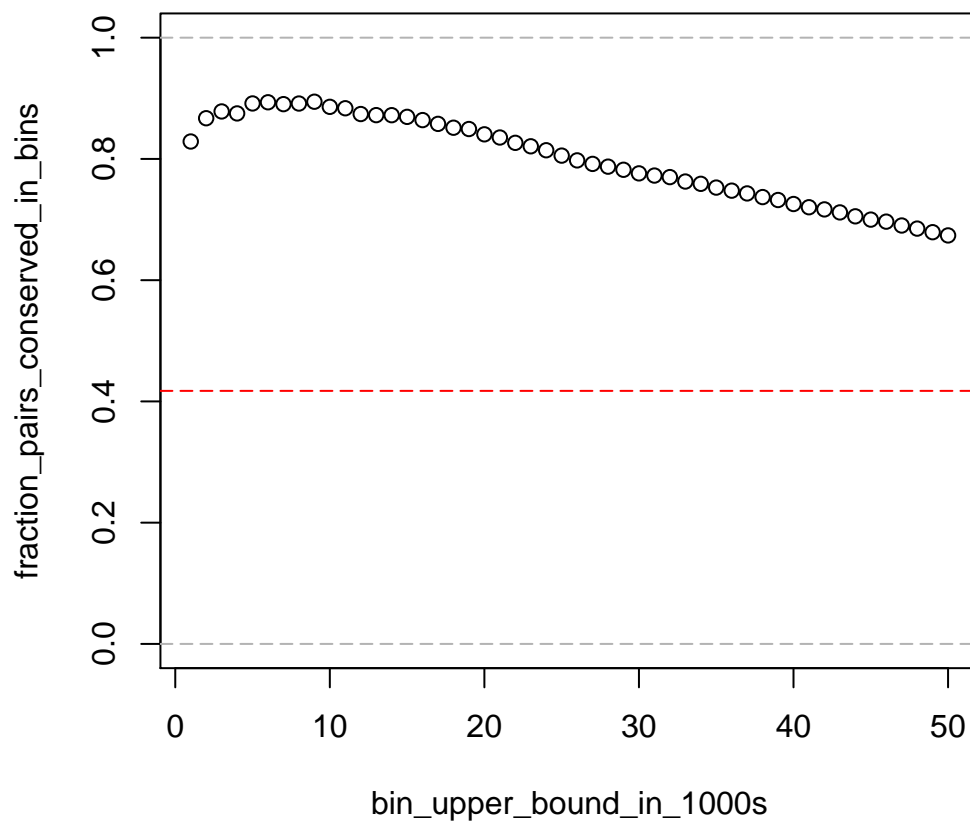

Supplement: s1 [file s1]

**Bin\_conservation\_minus\_bg\_Can18-4\_vs\_OR0704.3**  
**PD-0.470023**

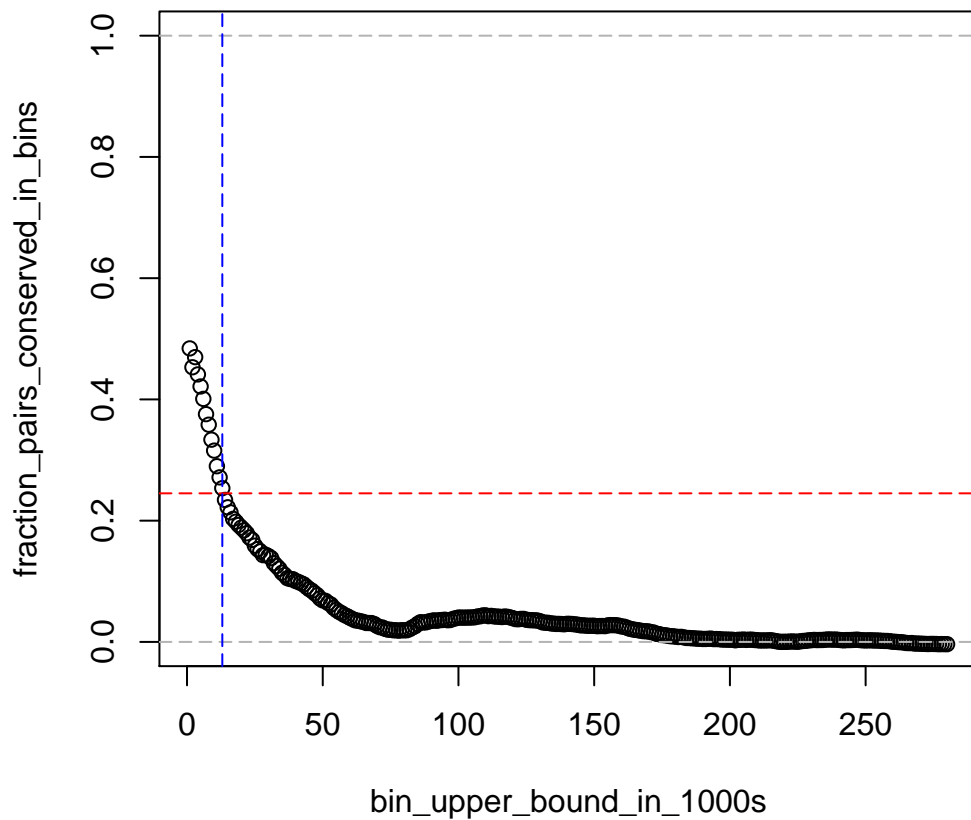

**Bin\_conservation\_minus\_bg\_Can18-4\_vs\_OR0704.3**  
**PD-0.470023**

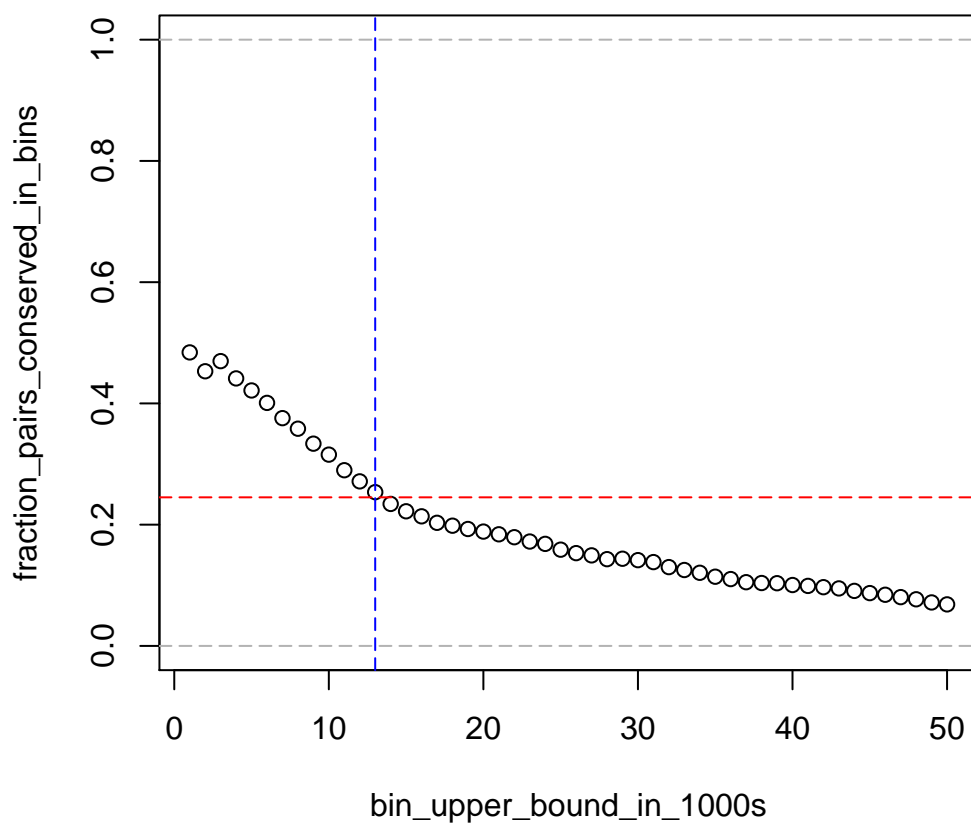

Supplement: s1 [file s1]

**Bin\_conservation\_minus\_bg\_AR158\_vs\_Canal-1**  
**PD-0.706019**

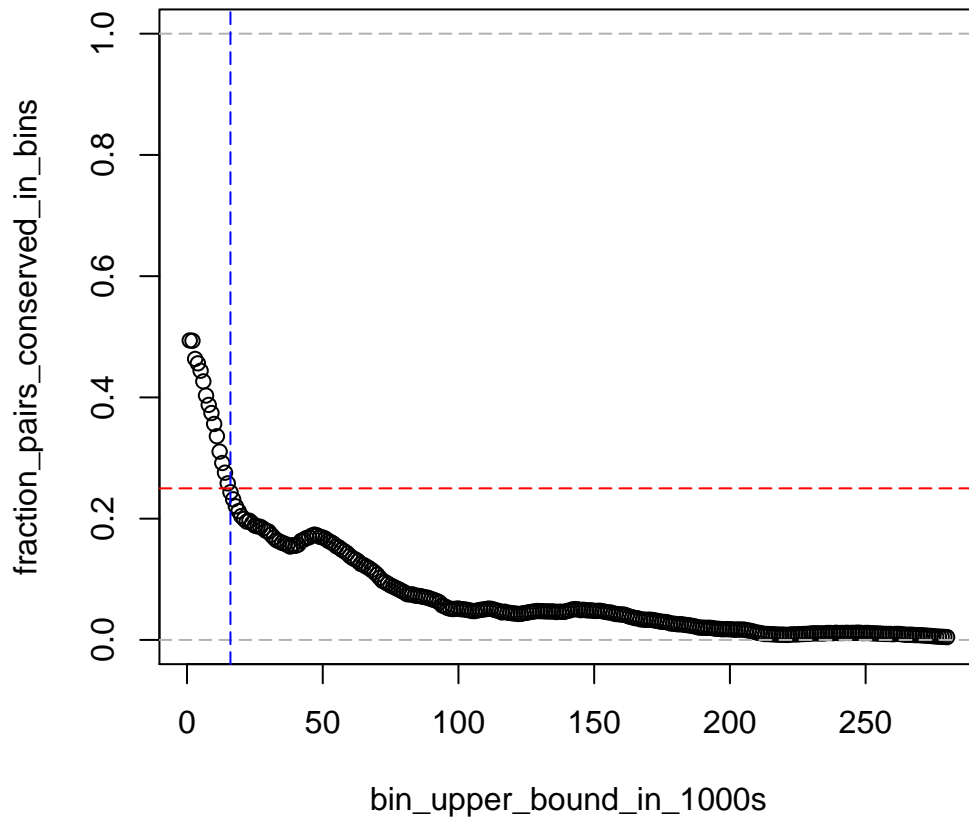

**Bin\_conservation\_minus\_bg\_AR158\_vs\_Canal-1**  
**PD-0.706019**

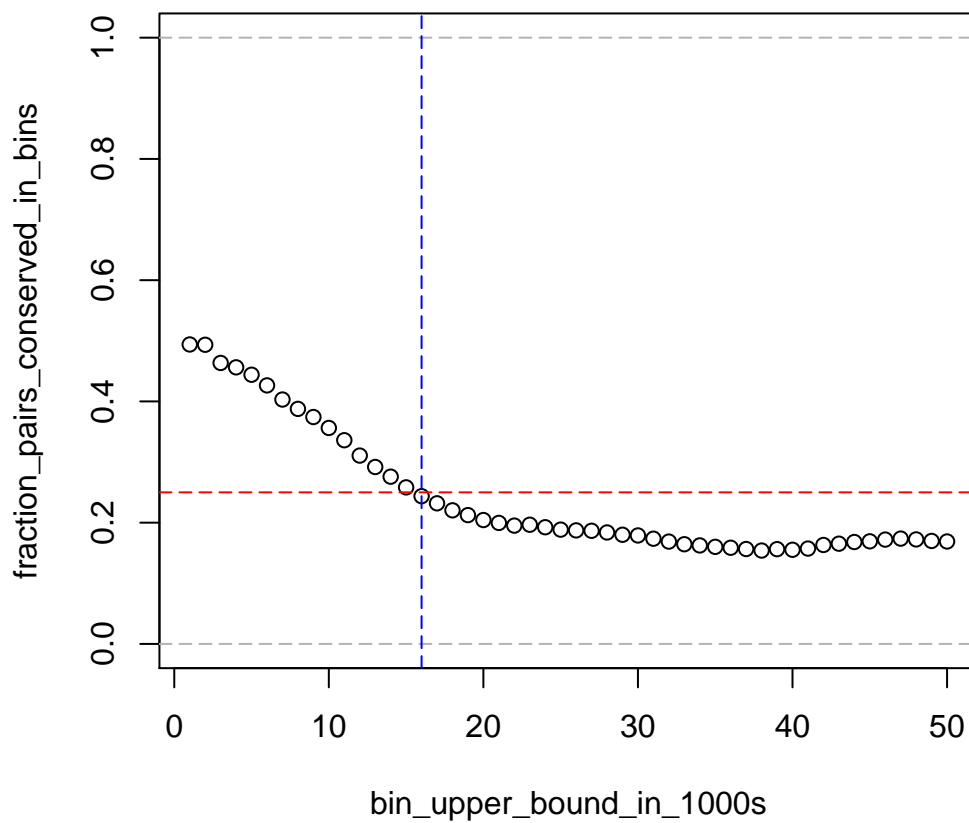

Supplement: s1 [file s1]

**Bin\_conservation\_minus\_bg\_CZ-2\_vs\_OR0704.3**  
**PD-0.465279**

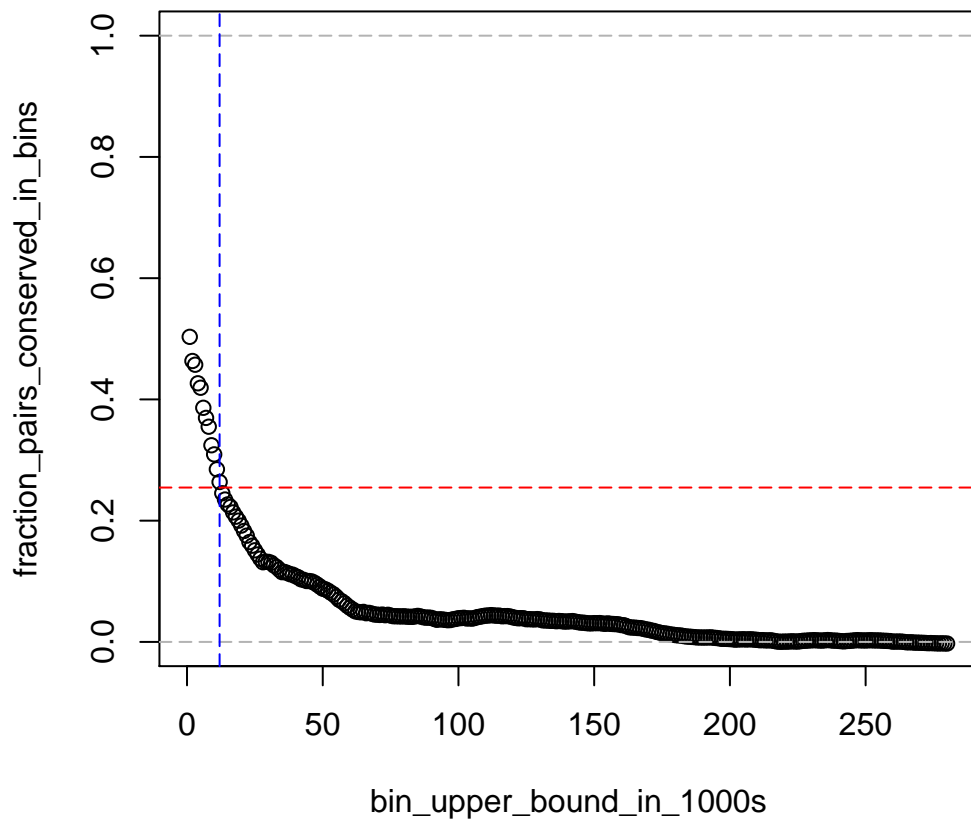

**Bin\_conservation\_minus\_bg\_CZ-2\_vs\_OR0704.3**  
**PD-0.465279**

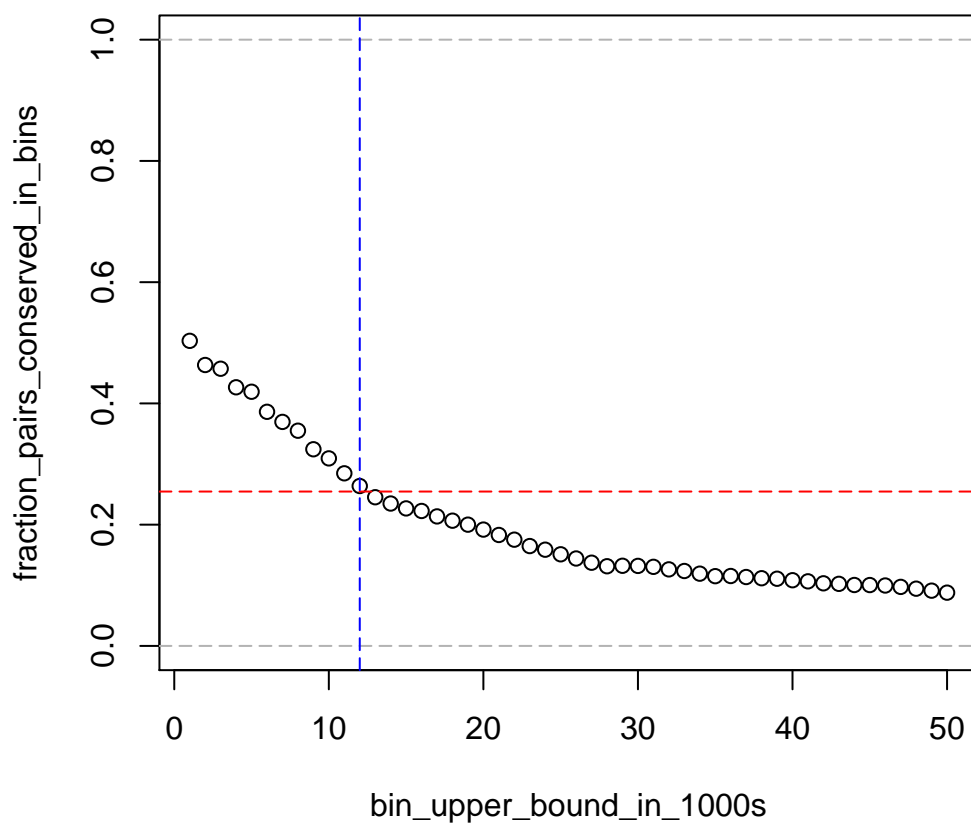

Supplement: s1 [file s1]

**Bin\_conservation\_minus\_bg\_ATCV1\_vs\_NYs-1**  
**PD-0.702005**

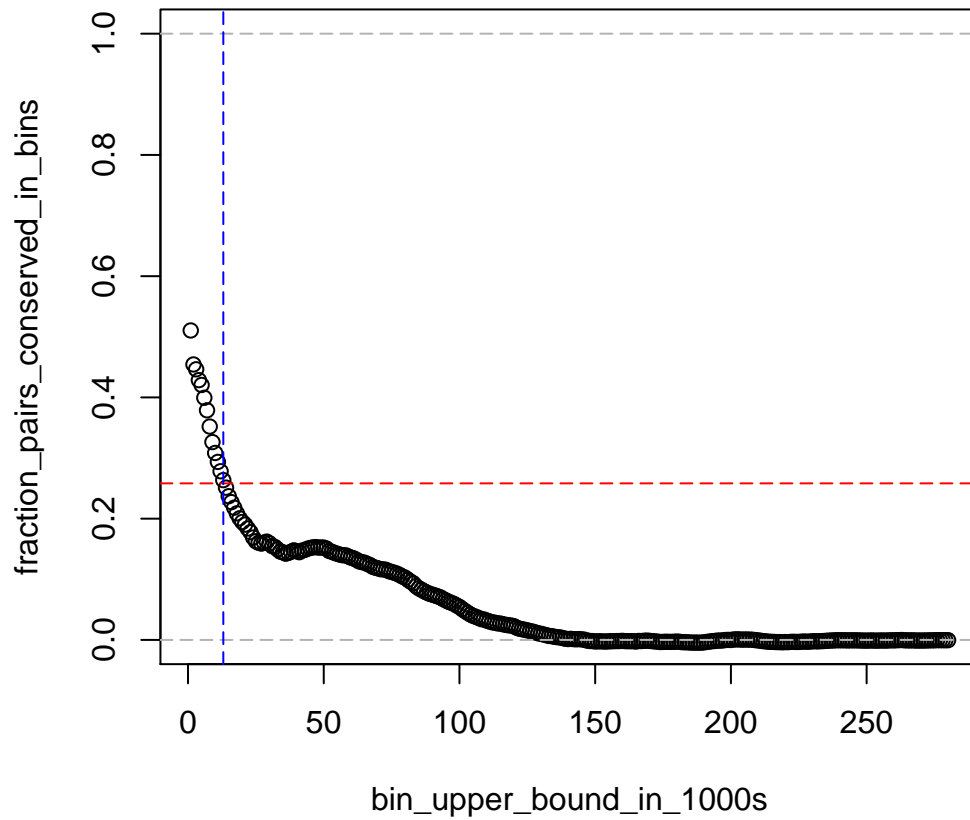

**Bin\_conservation\_minus\_bg\_ATCV1\_vs\_NYs-1**  
**PD-0.702005**

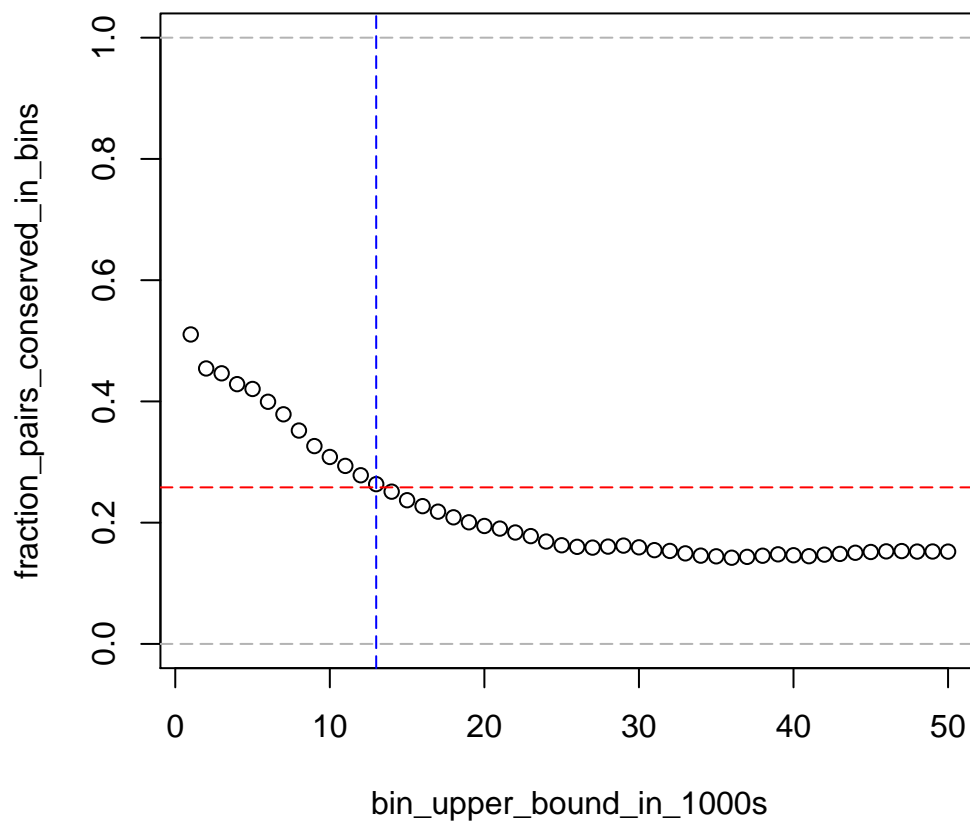

Supplement: s1 [file s1]

**Bin\_conservation\_minus\_bg\_CVR-1\_vs\_NW665.2**  
**PD-0.016477**

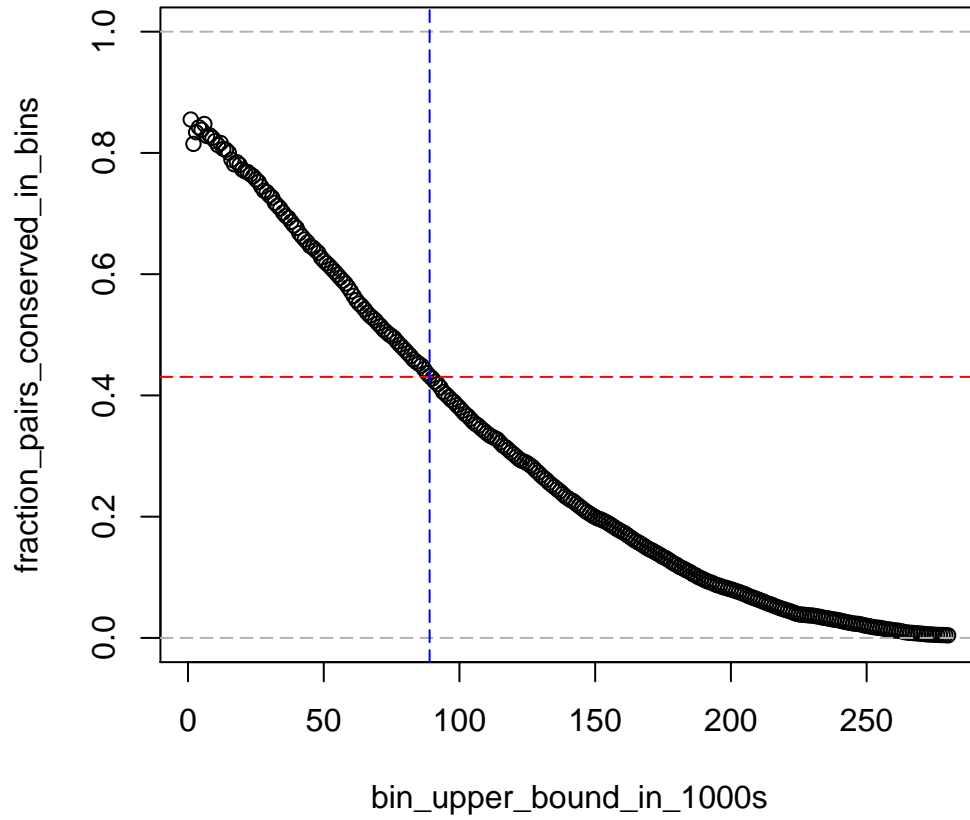

**Bin\_conservation\_minus\_bg\_CVR-1\_vs\_NW665.2**  
**PD-0.016477**

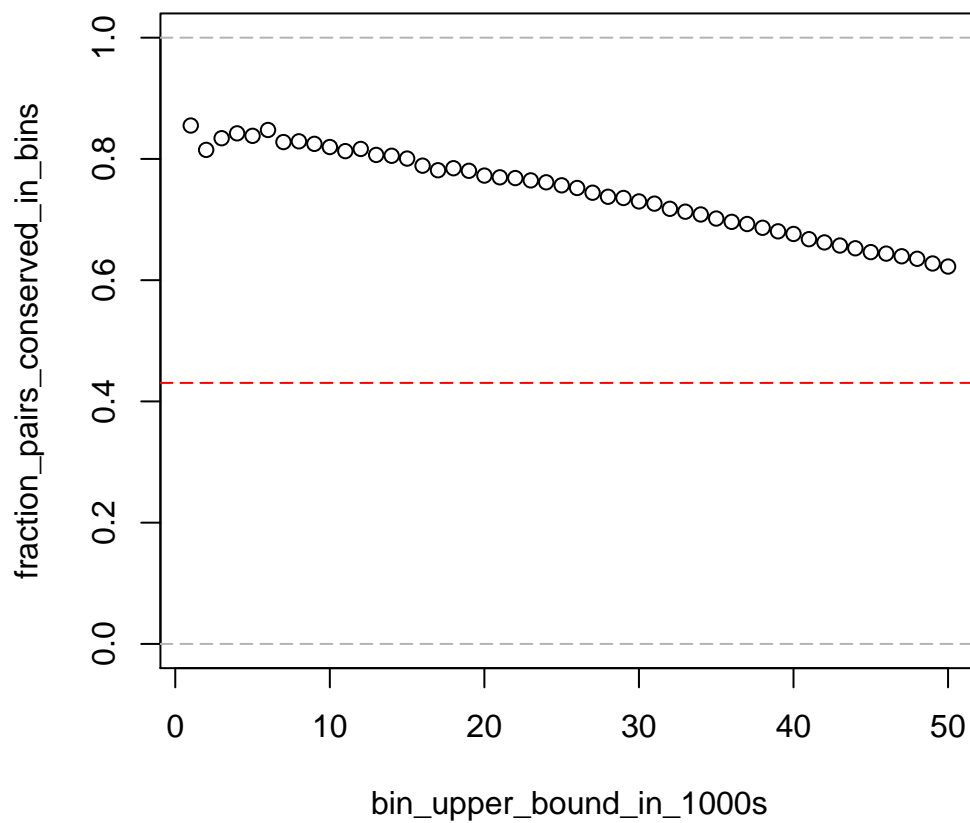

Supplement: s1 [file s1]

**Bin\_conservation\_minus\_bg\_CZ-2\_vs\_NTS-1**  
**PD-0.45999**

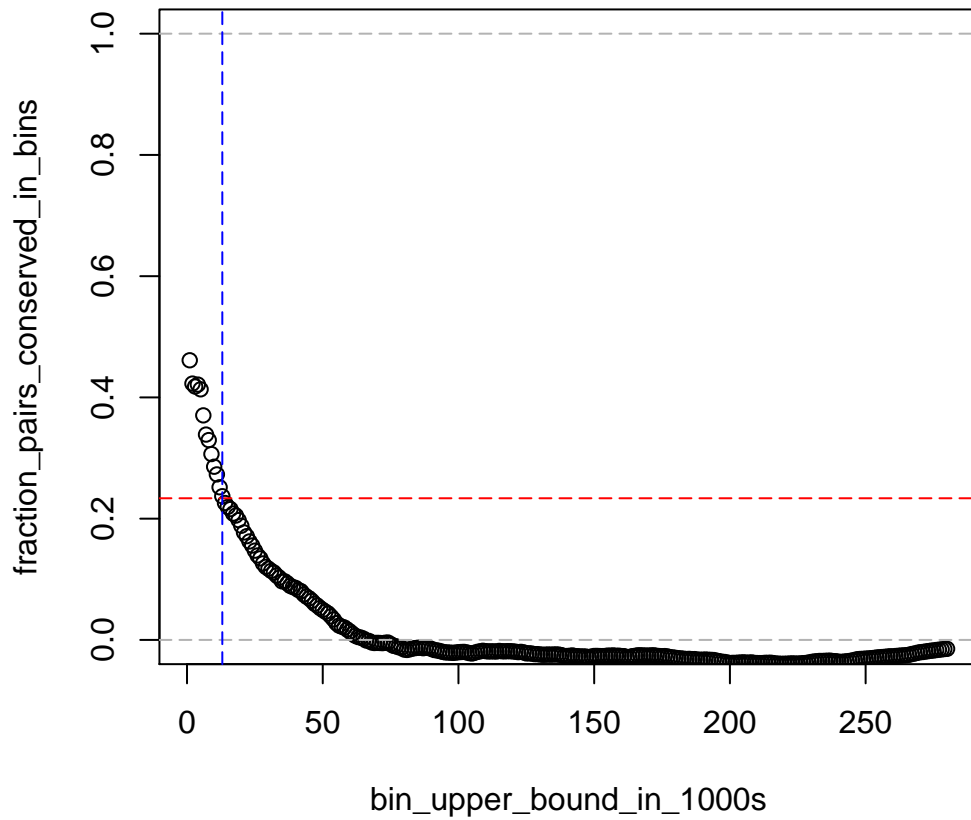

**Bin\_conservation\_minus\_bg\_CZ-2\_vs\_NTS-1**  
**PD-0.45999**

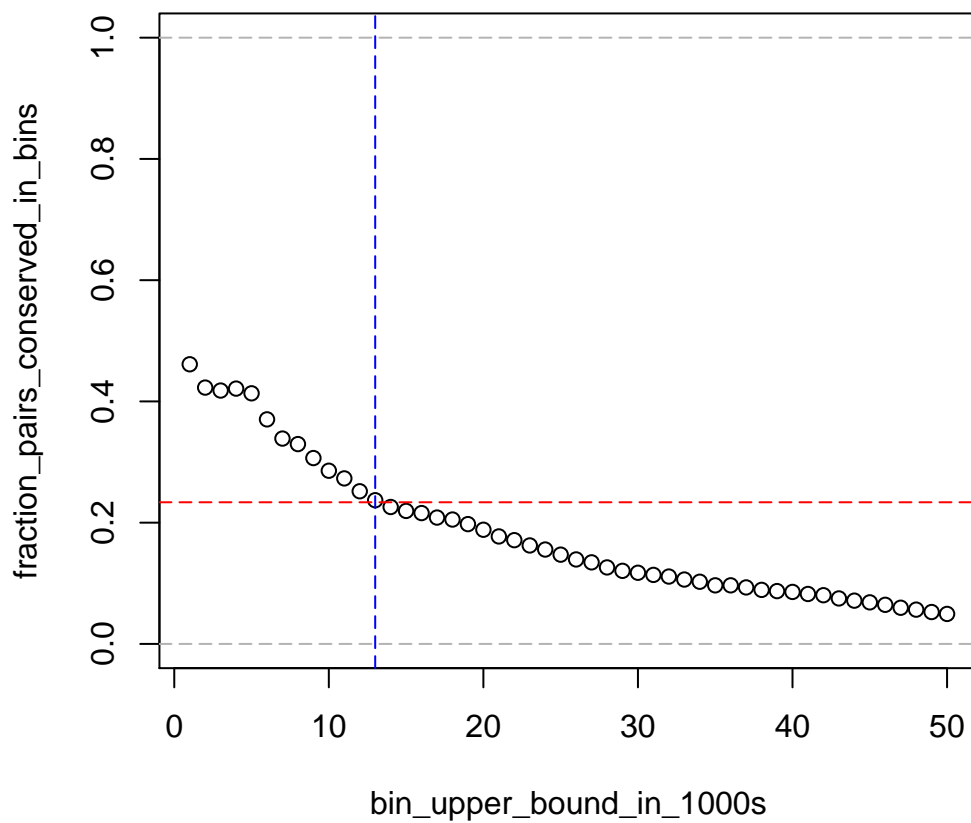

Supplement: s1 [file s1]

**Bin\_conservation\_minus\_bg\_Canal-1\_vs\_NY2A**  
**PD-0.710515**

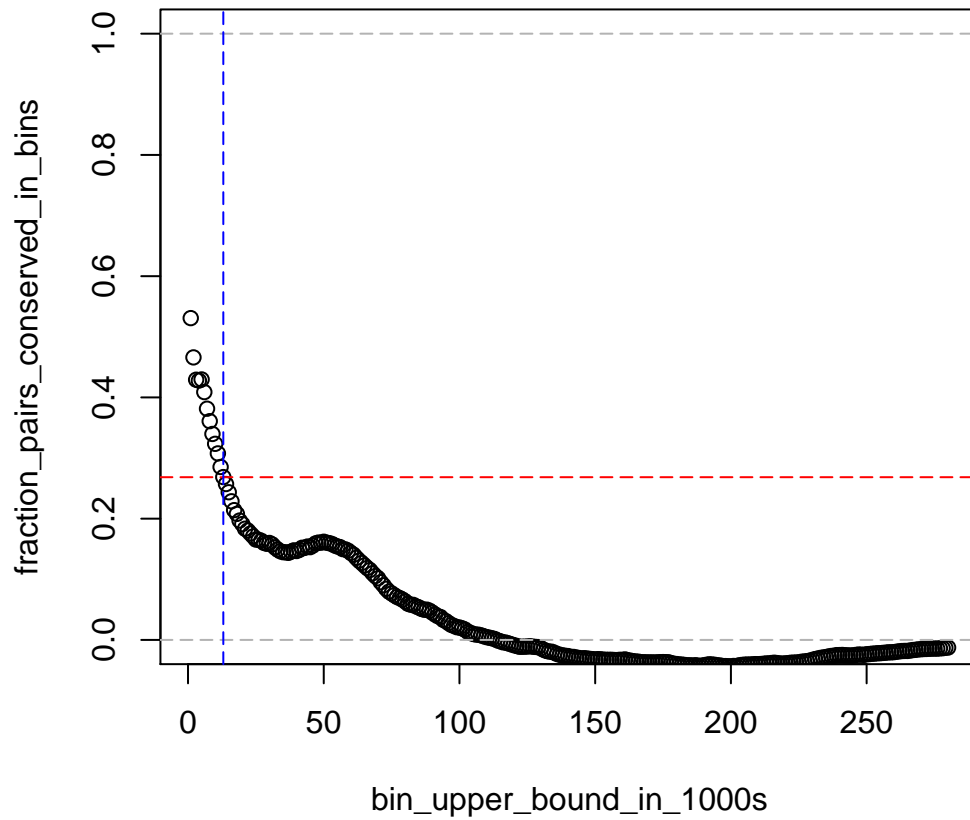

**Bin\_conservation\_minus\_bg\_Canal-1\_vs\_NY2A**  
**PD-0.710515**

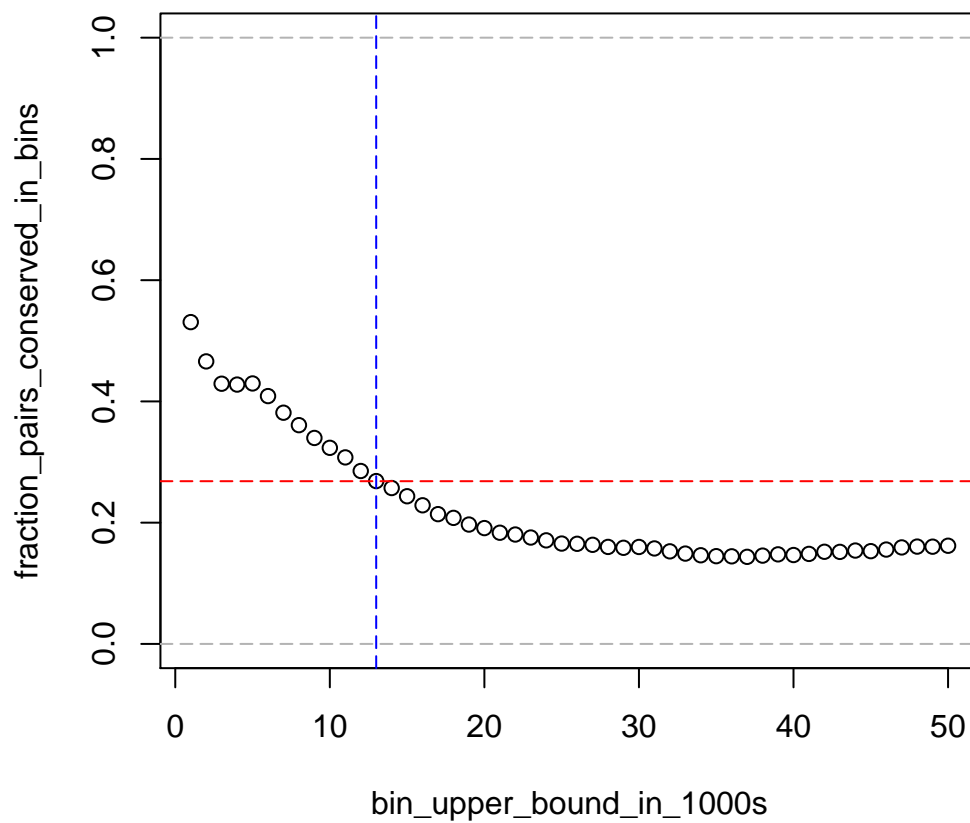

Supplement: s1 [file s1]

**Bin\_conservation\_minus\_bg\_CVR-1\_vs\_NY2A**  
**PD-0.665424**

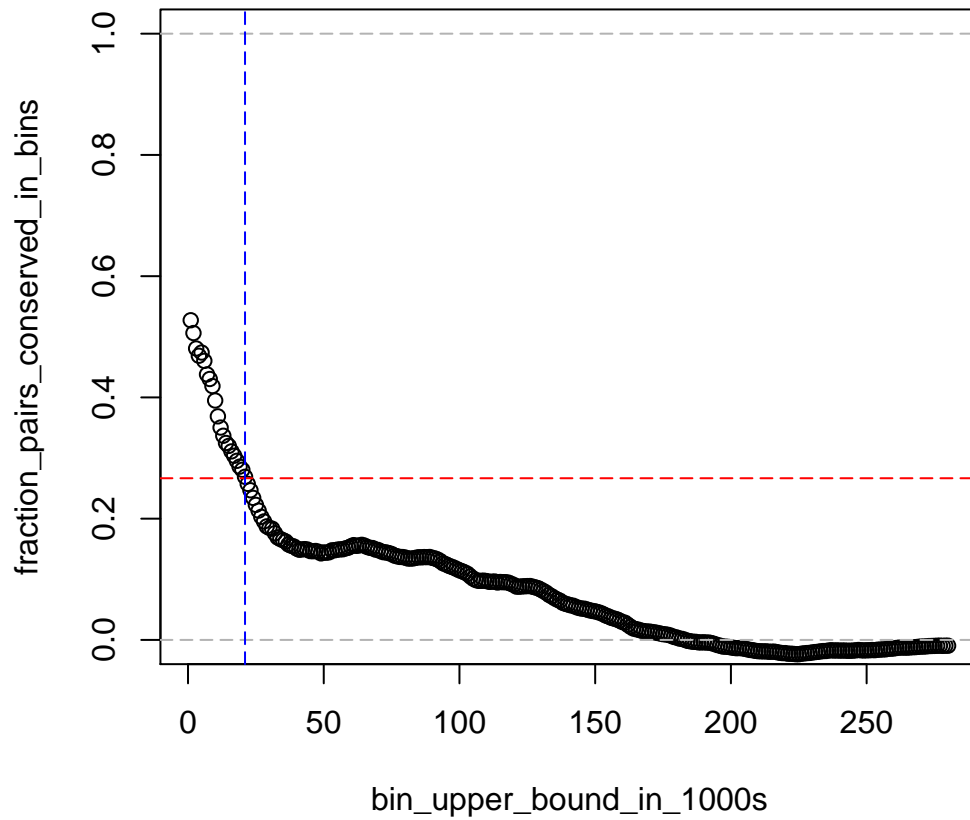

**Bin\_conservation\_minus\_bg\_CVR-1\_vs\_NY2A**  
**PD-0.665424**

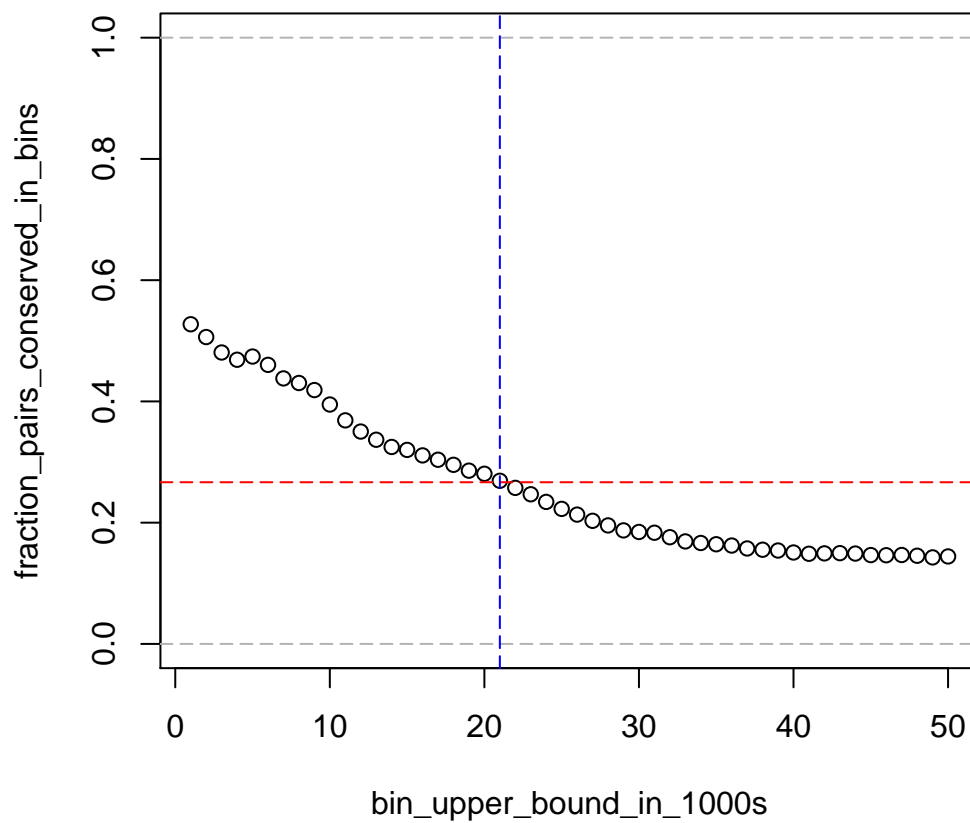

Supplement: s1 [file s1]

**Bin\_conservation\_minus\_bg\_FR483\_vs\_NY2A**  
**PD-0.6729**

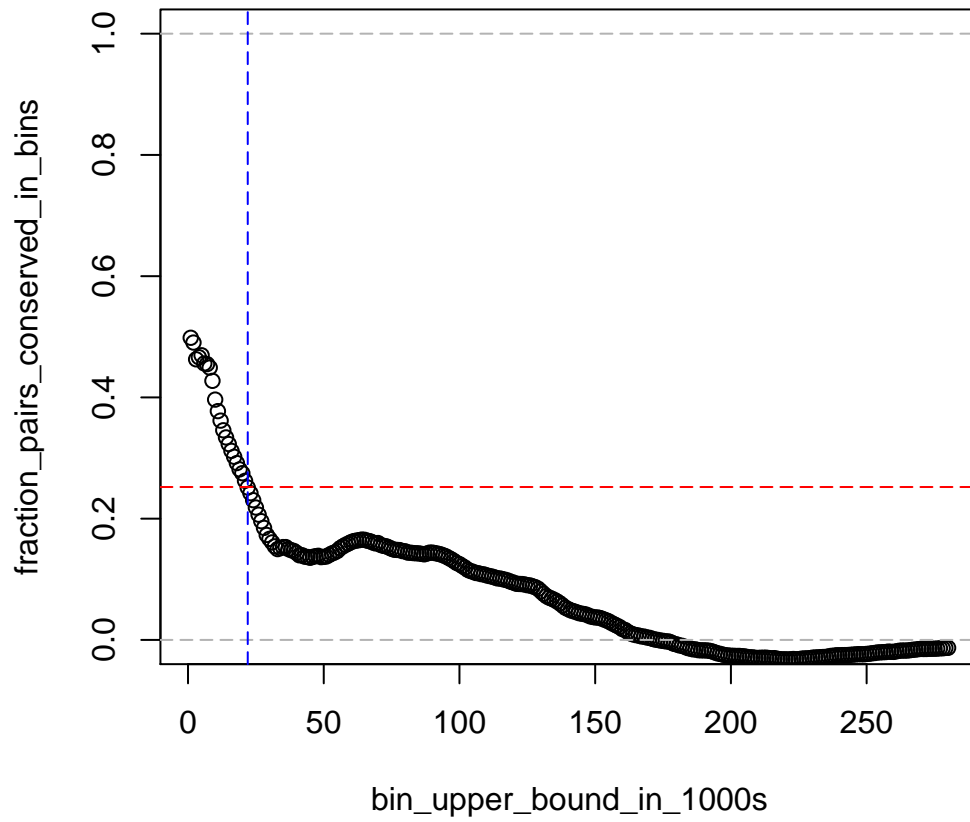

**Bin\_conservation\_minus\_bg\_FR483\_vs\_NY2A**  
**PD-0.6729**

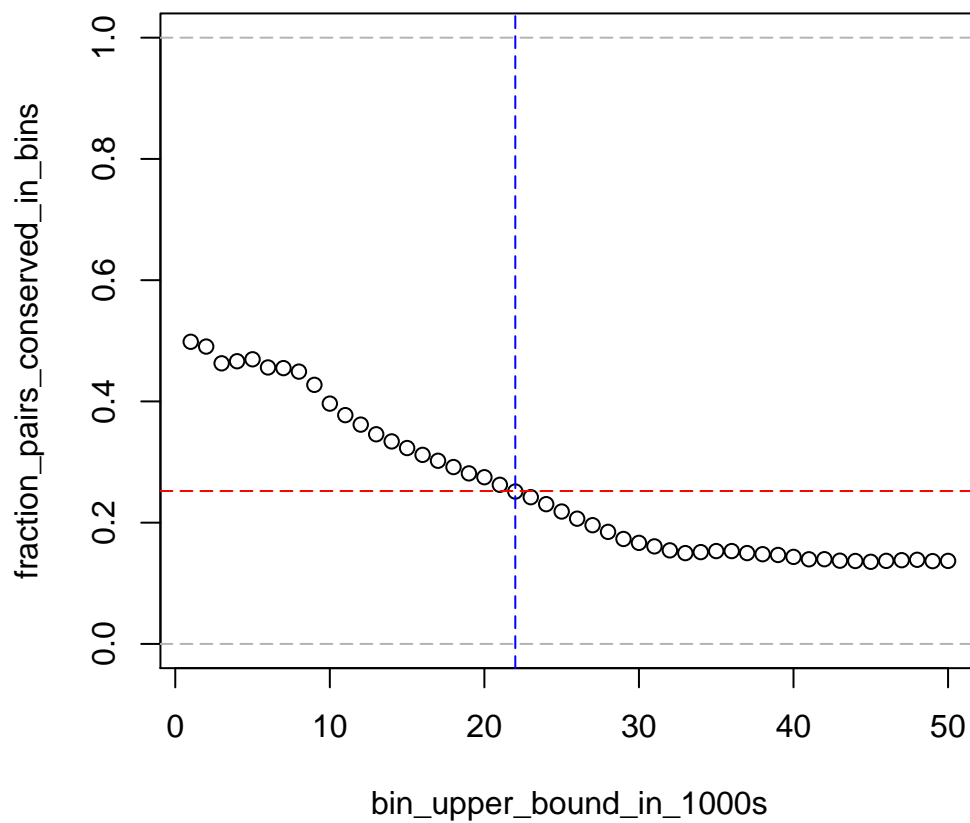

Supplement: s1 [file s1]

**Bin\_conservation\_minus\_bg\_CZ-2\_vs\_MA-1E**  
**PD-0.657609**

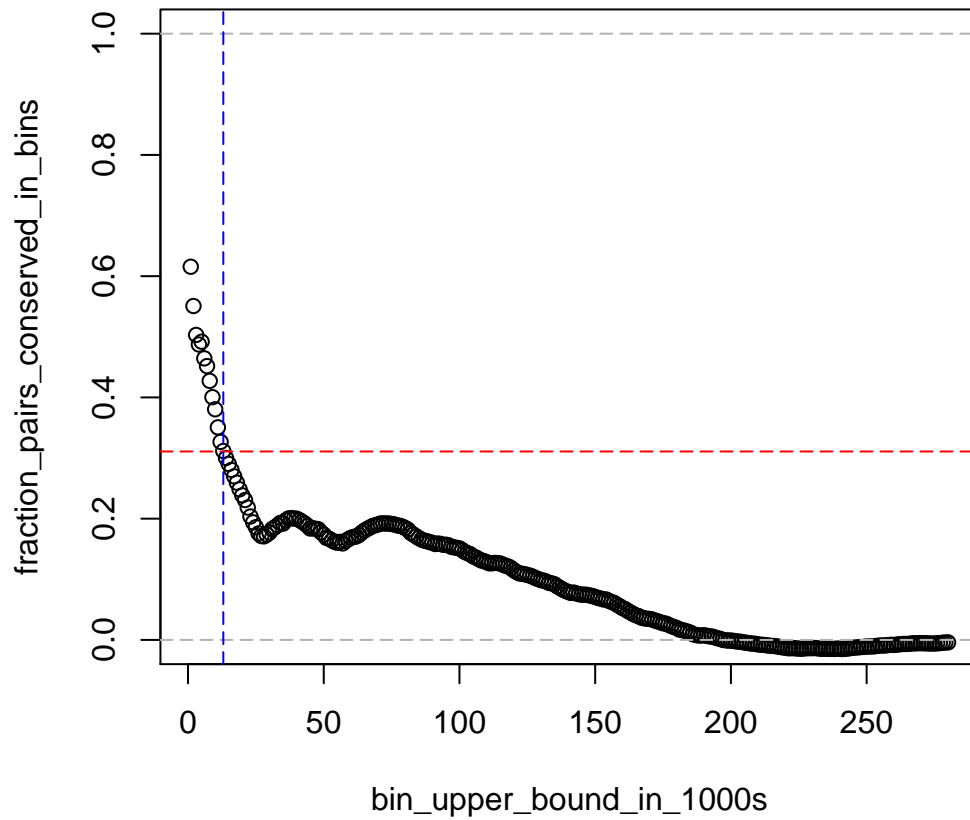

**Bin\_conservation\_minus\_bg\_CZ-2\_vs\_MA-1E**  
**PD-0.657609**

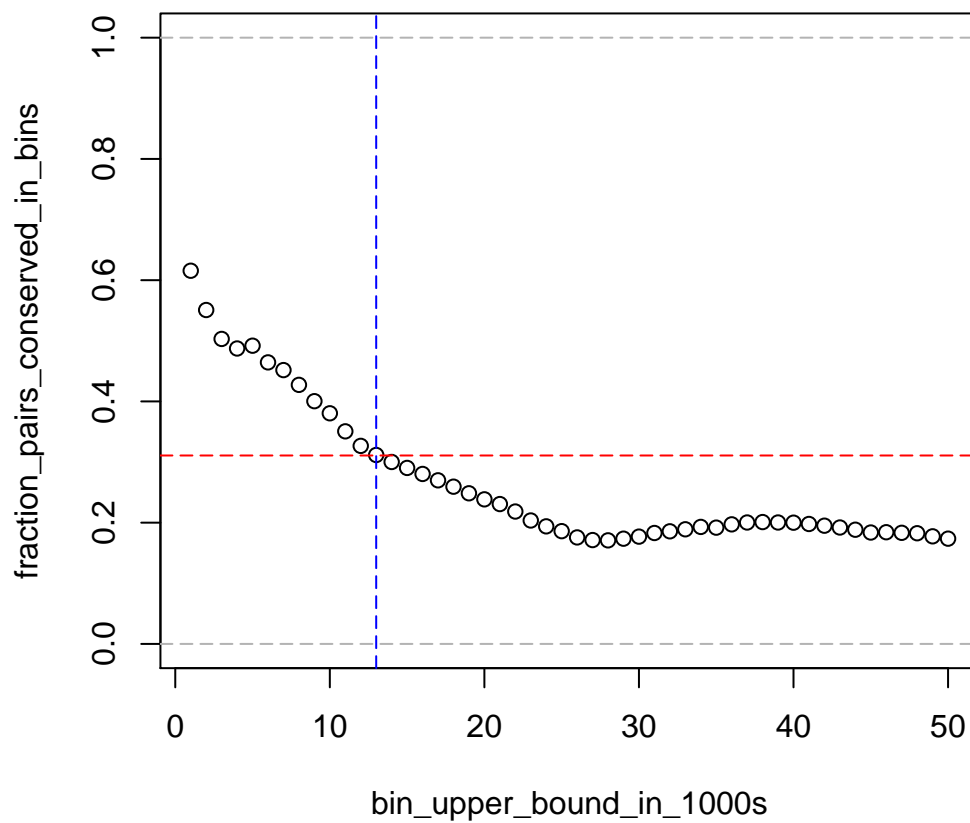

Supplement: s1 [file s1]

**Bin\_conservation\_minus\_bg\_Br0604L\_vs\_CZ-2**  
**PD-0.454295**

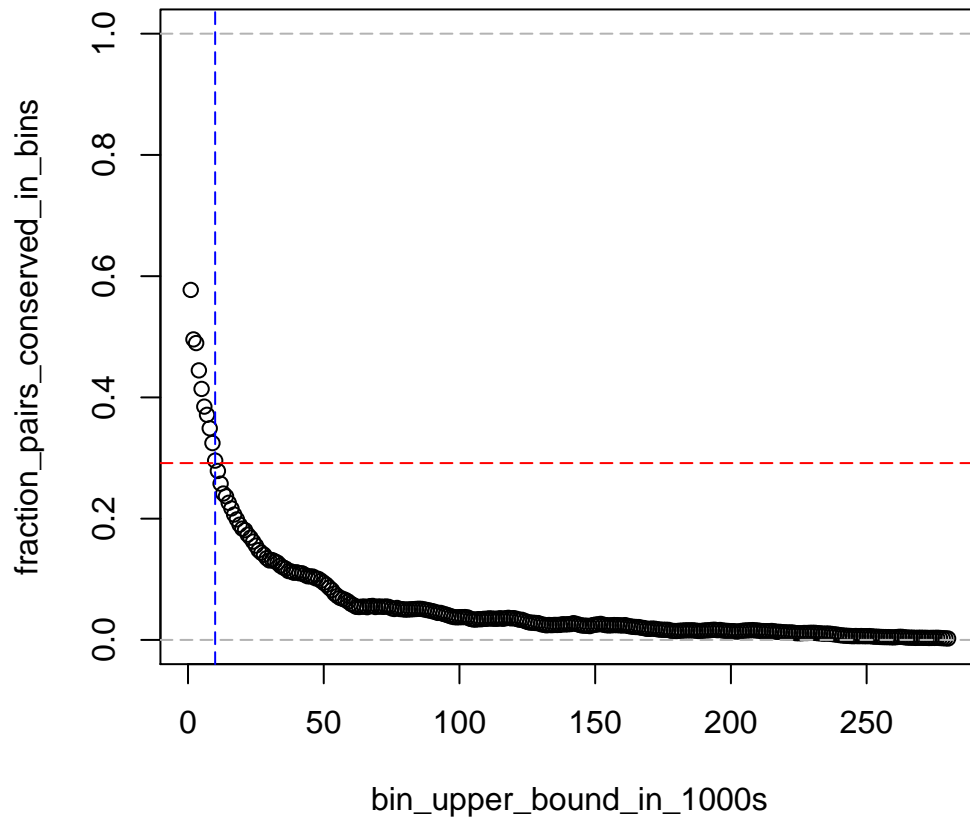

**Bin\_conservation\_minus\_bg\_Br0604L\_vs\_CZ-2**  
**PD-0.454295**

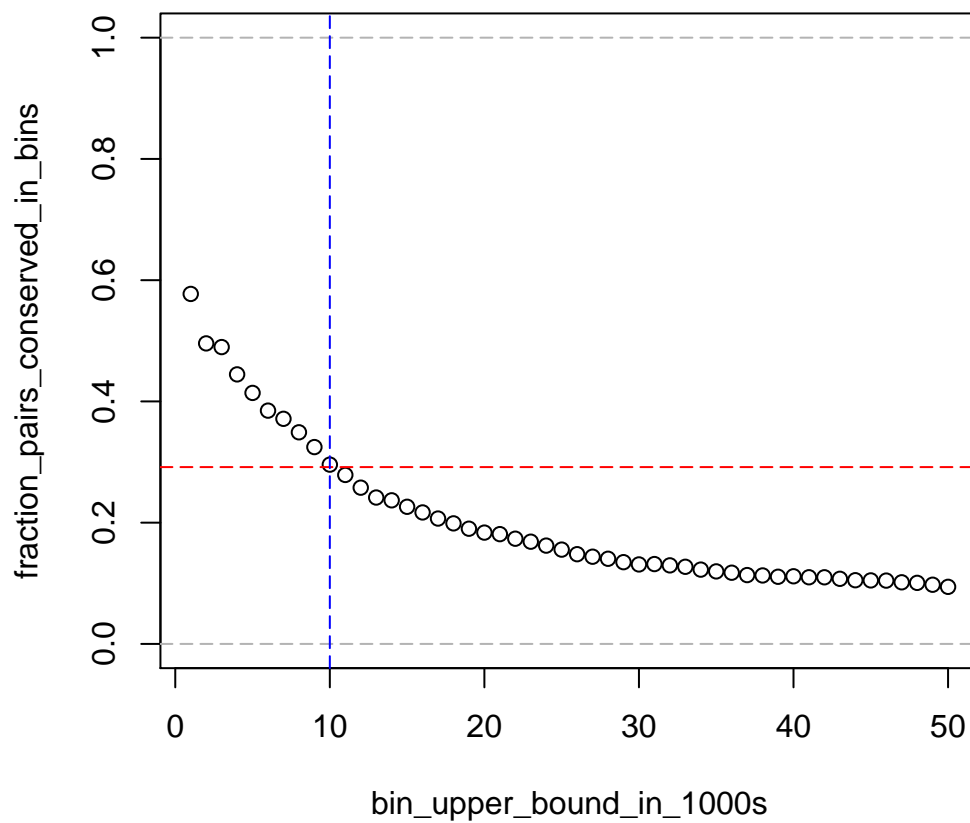

Supplement: s1 [file s1]

**Bin\_conservation\_minus\_bg\_Can18-4\_vs\_NE-JV-2**  
**PD-0.46971**

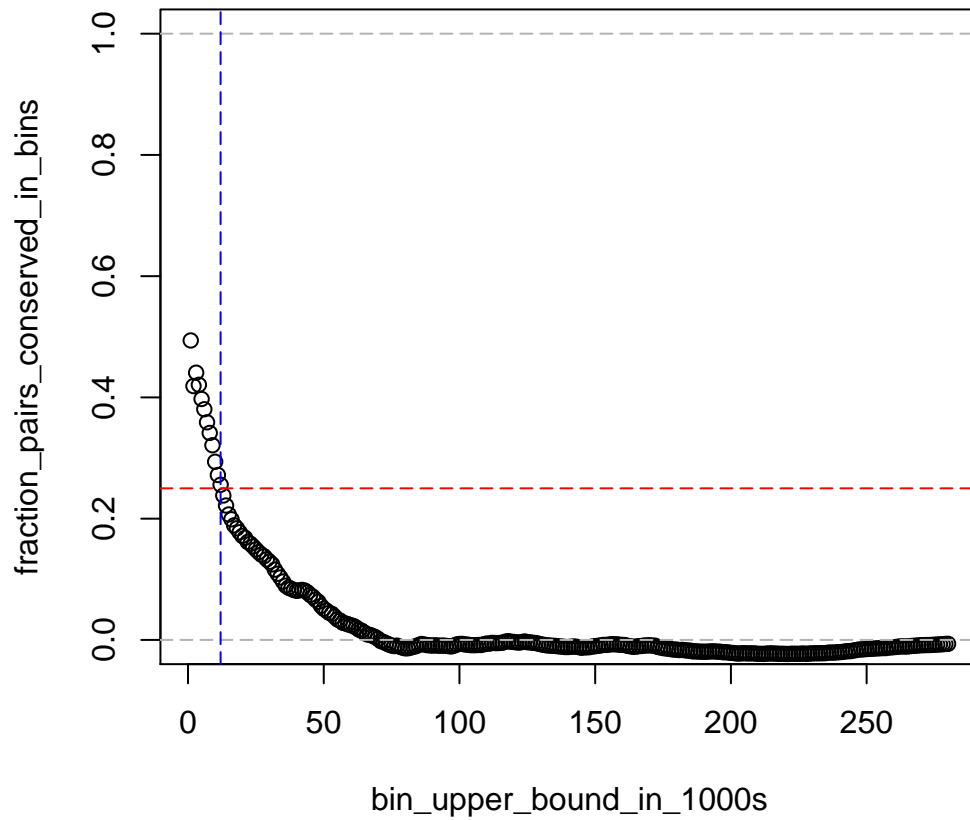

**Bin\_conservation\_minus\_bg\_Can18-4\_vs\_NE-JV-2**  
**PD-0.46971**

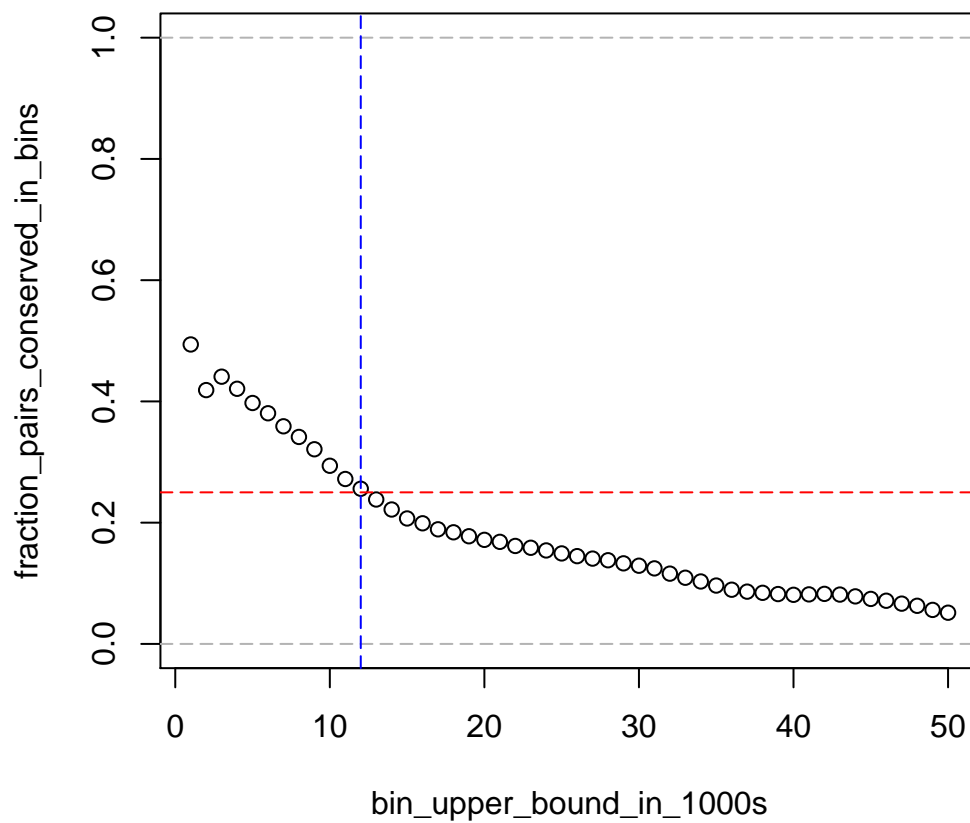

Supplement: s1 [file s1]

**Bin\_conservation\_minus\_bg\_CVM-1\_vs\_MA-1E**  
**PD-0.651966**

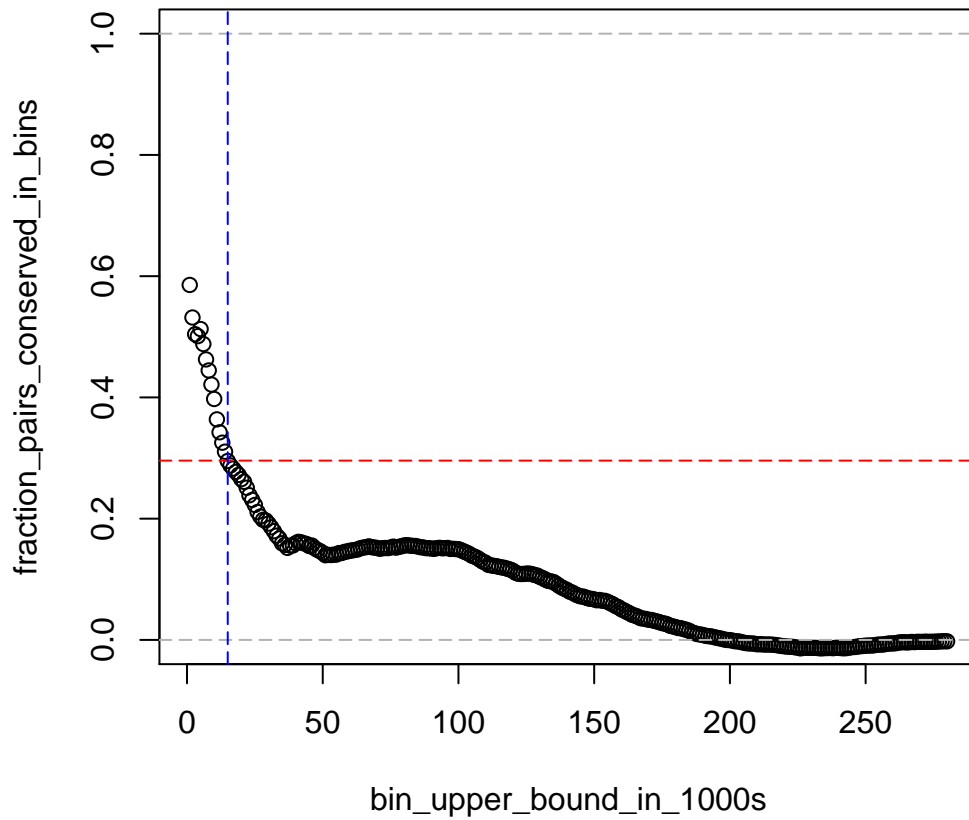

**Bin\_conservation\_minus\_bg\_CVM-1\_vs\_MA-1E**  
**PD-0.651966**

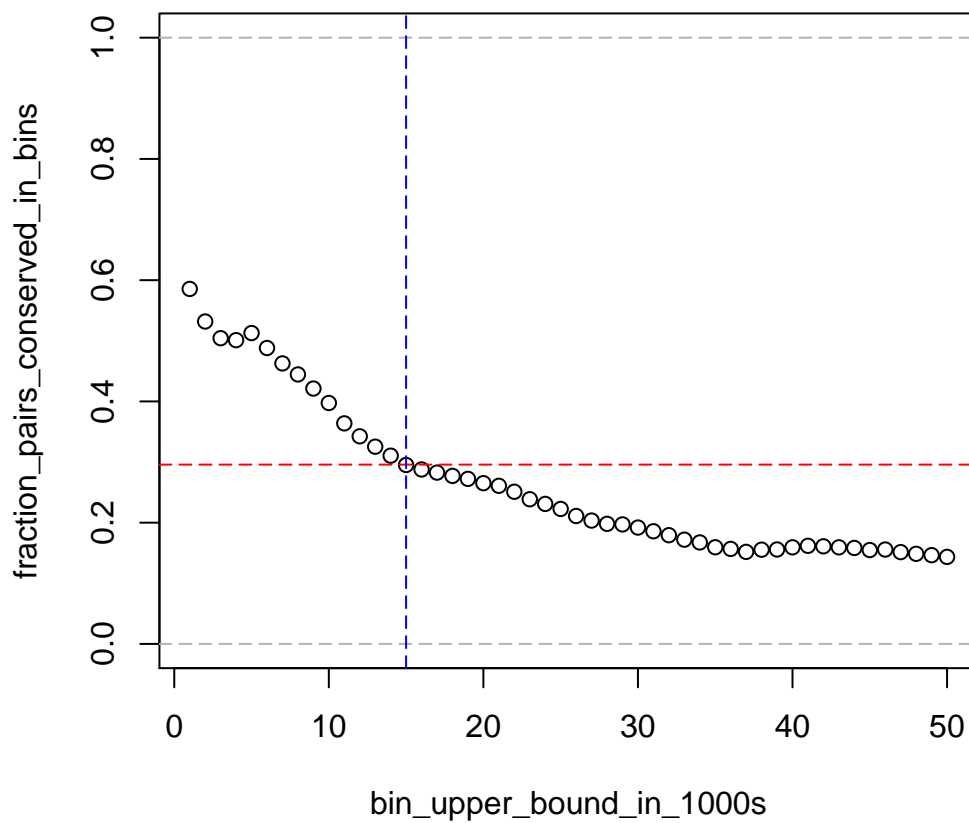

Supplement: s1 [file s1]
