# Supplementary figures and images for: Gene Gangs of the Chloroviruses: Conserved Clusters of Collinear Monocistronic Genes (part 7 of 9)
Source: MDPI journal article supplement (doi:10.3390/v10100576), 2018-10-20

**Bin\_conservation\_minus\_bg\_Br0604L\_vs\_Can18-4**  
**PD-0.459039**

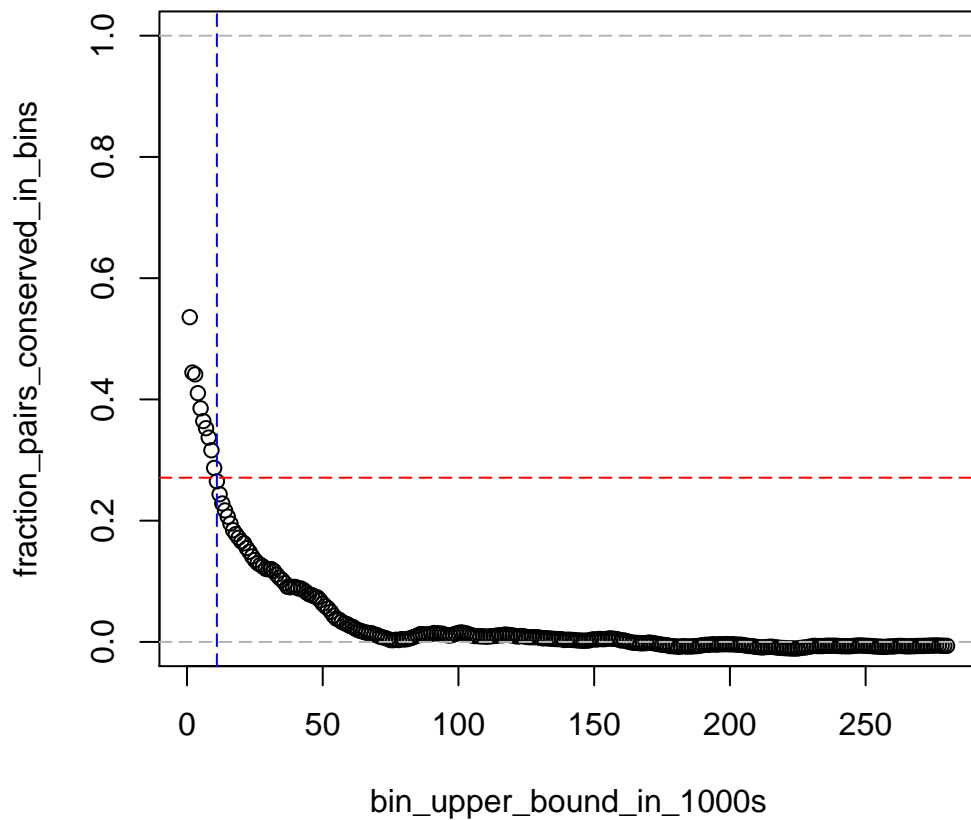

**Bin\_conservation\_minus\_bg\_Br0604L\_vs\_Can18-4**  
**PD-0.459039**

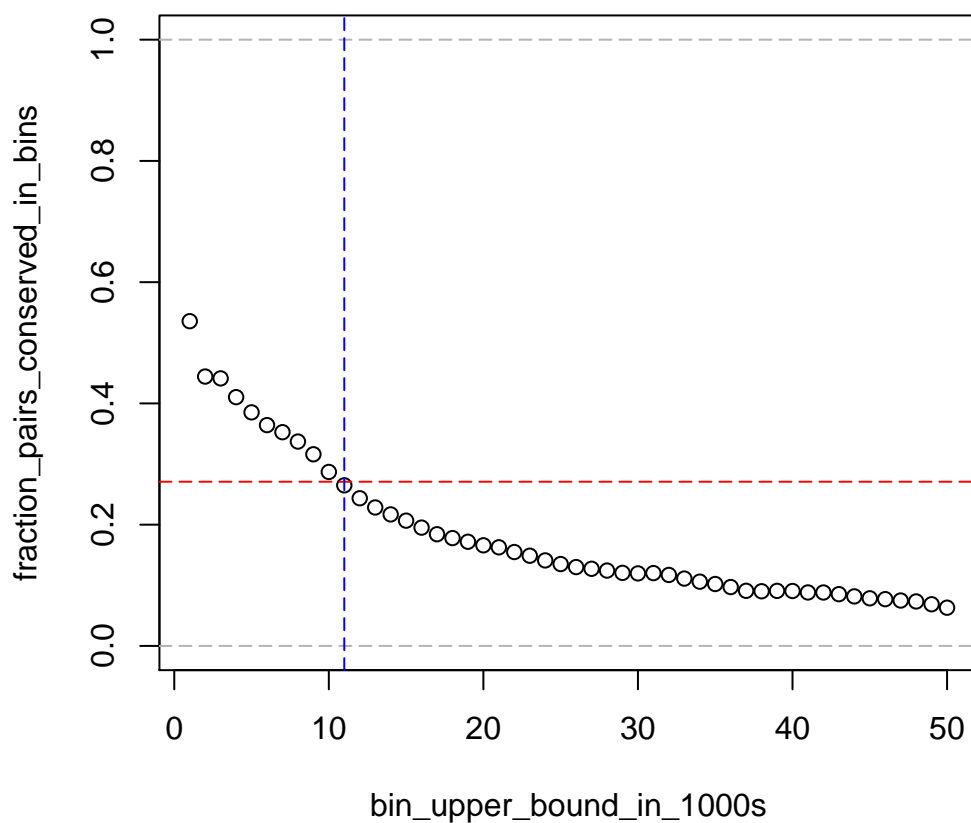

Supplement: s1 [file s1]

**Bin\_conservation\_minus\_bg\_AP110A\_vs\_MN0810.1**  
**PD-0.460296**

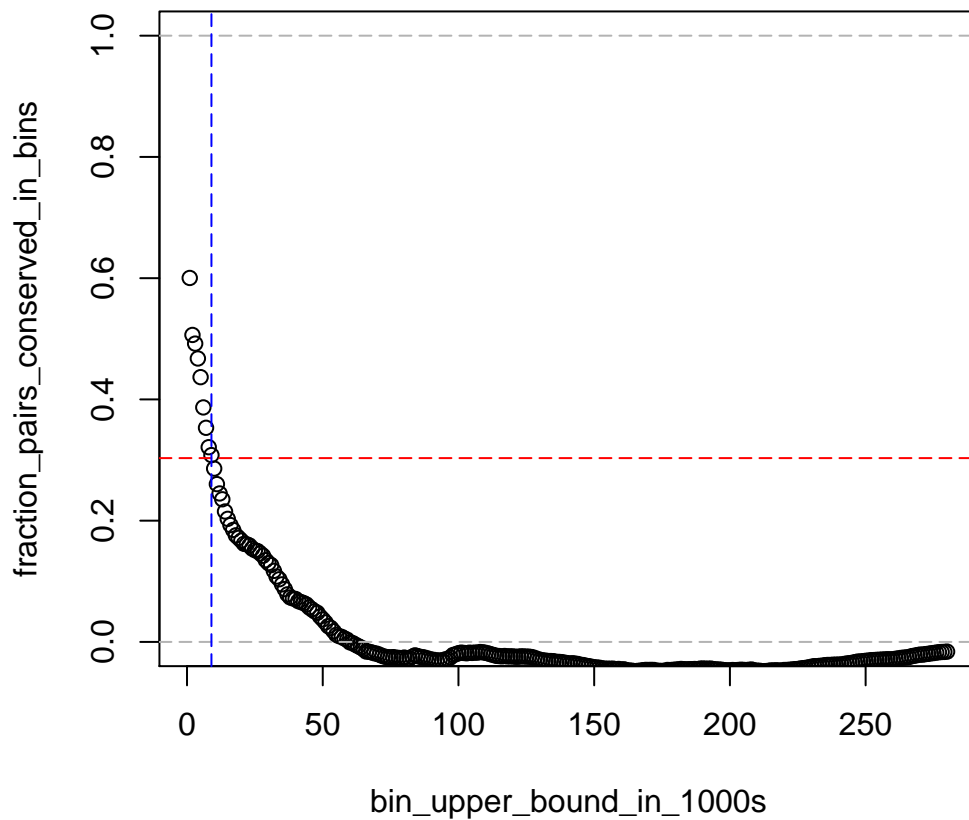

**Bin\_conservation\_minus\_bg\_AP110A\_vs\_MN0810.1**  
**PD-0.460296**

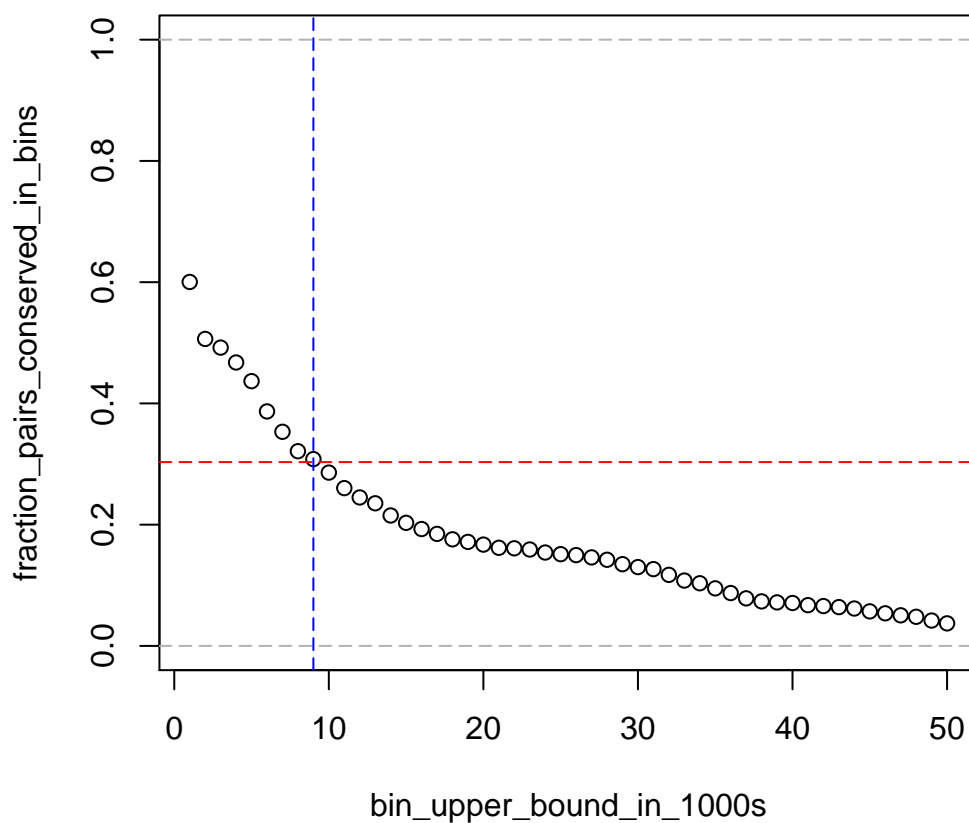

Supplement: s1 [file s1]

**Bin\_conservation\_minus\_bg\_CVA-1\_vs\_NY2A**  
**PD-0.665424**

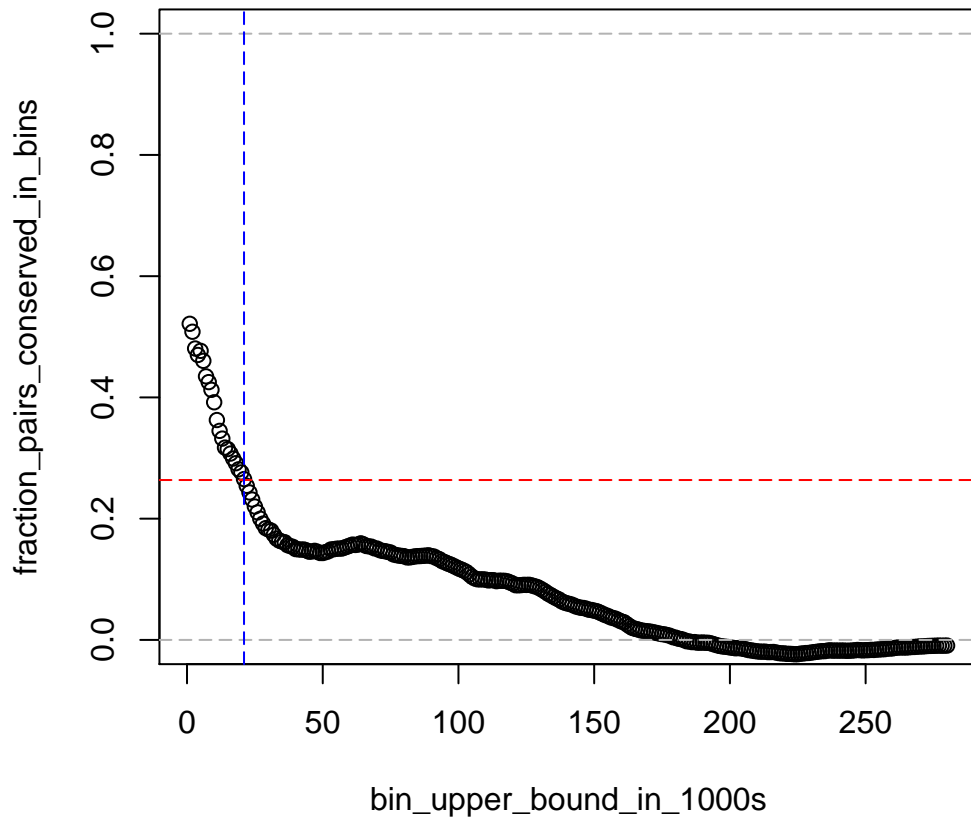

**Bin\_conservation\_minus\_bg\_CVA-1\_vs\_NY2A**  
**PD-0.665424**

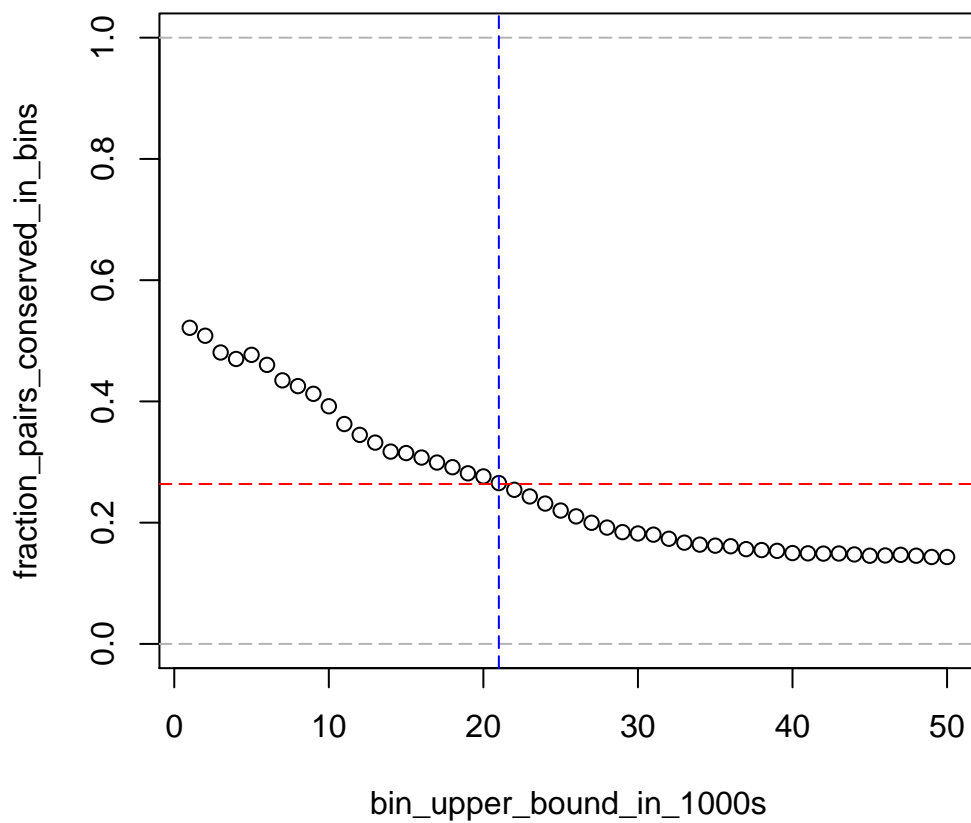

Supplement: s1 [file s1]

**Bin\_conservation\_minus\_bg\_AP110A\_vs\_MT325**  
**PD-0.025502**

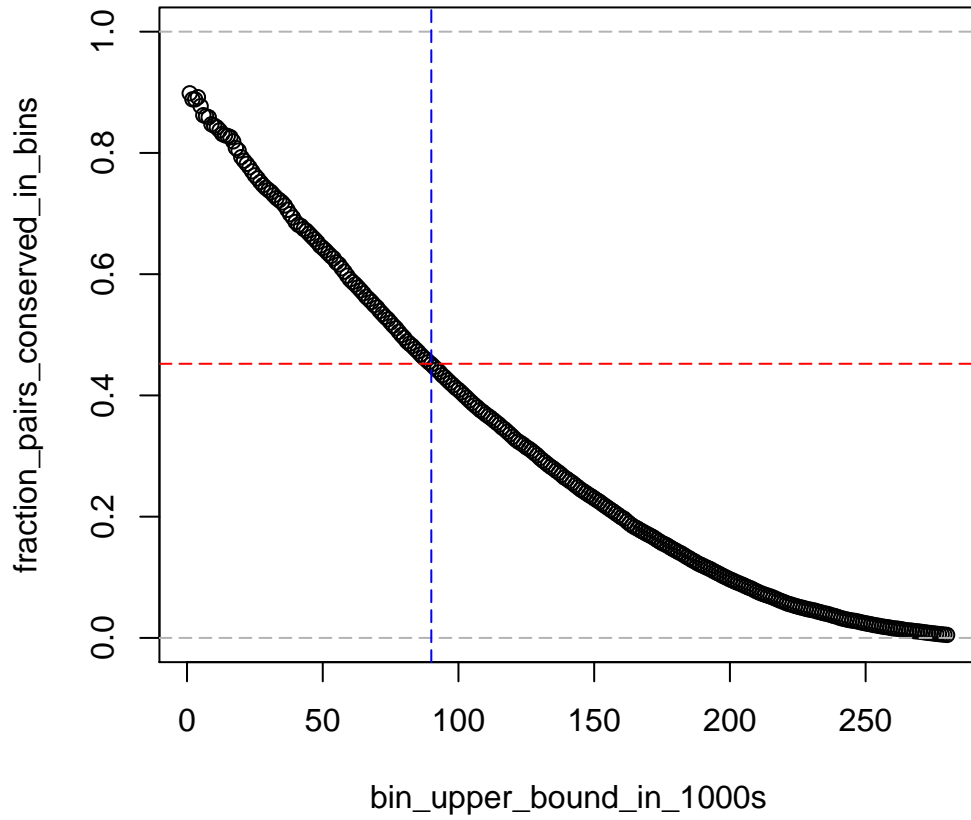

**Bin\_conservation\_minus\_bg\_AP110A\_vs\_MT325**  
**PD-0.025502**

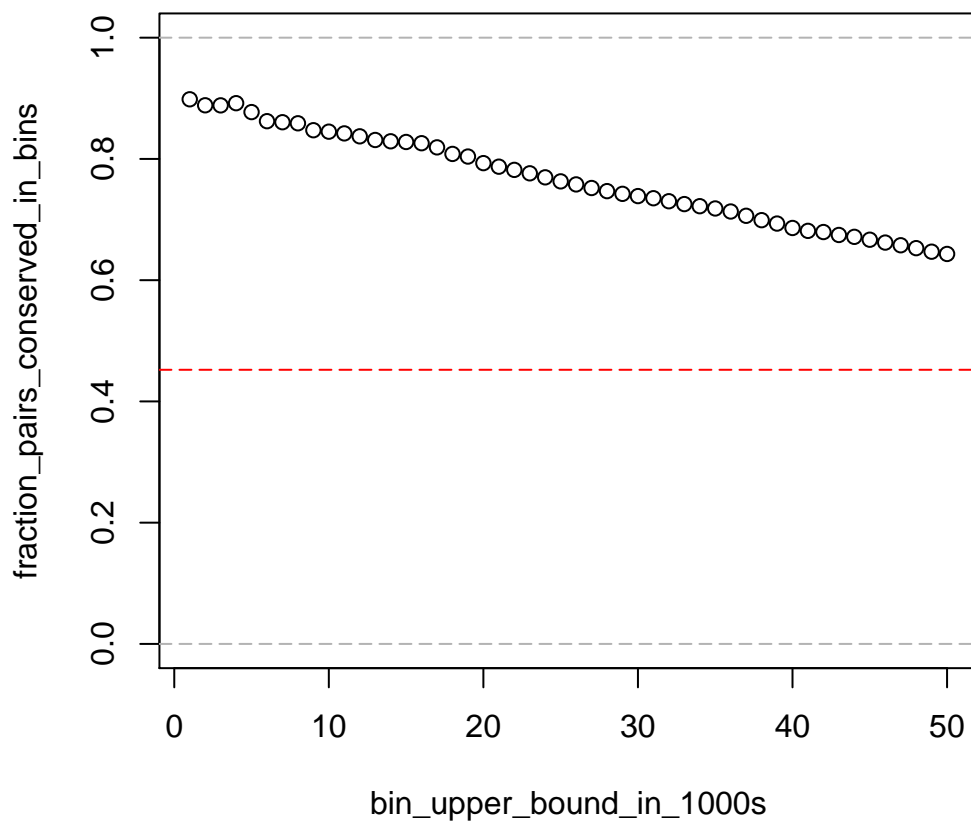

Supplement: s1 [file s1]

**Bin\_conservation\_minus\_bg\_FR483\_vs\_IL-5-2s1**  
**PD-0.666359**

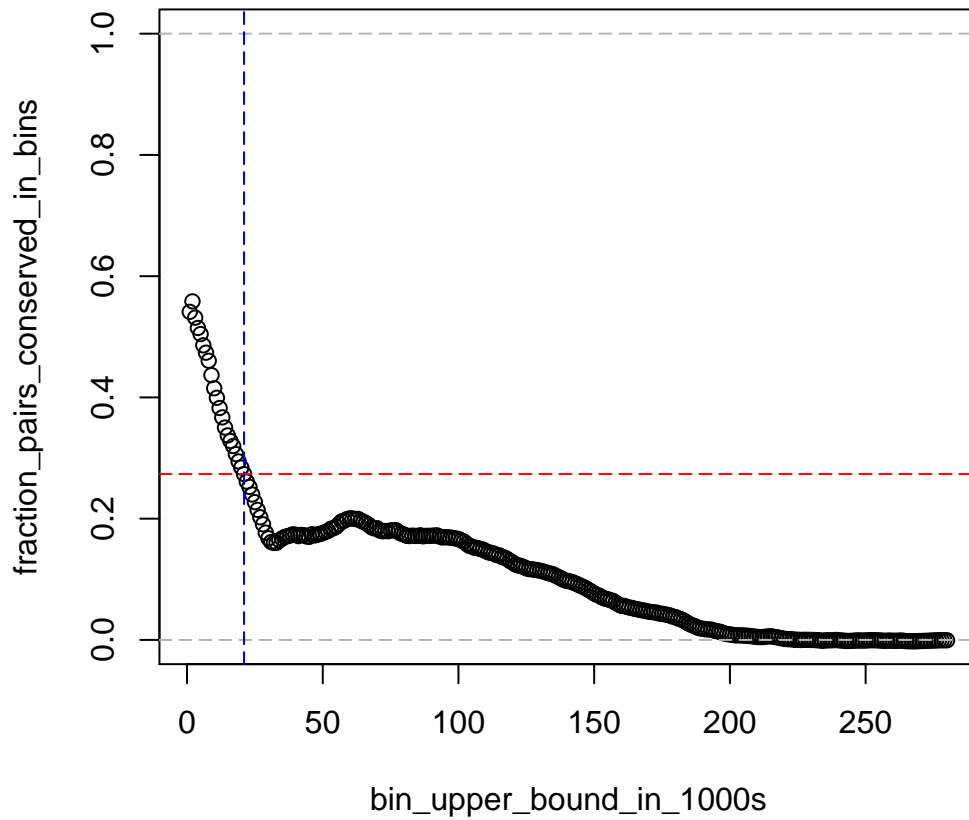

**Bin\_conservation\_minus\_bg\_FR483\_vs\_IL-5-2s1**  
**PD-0.666359**

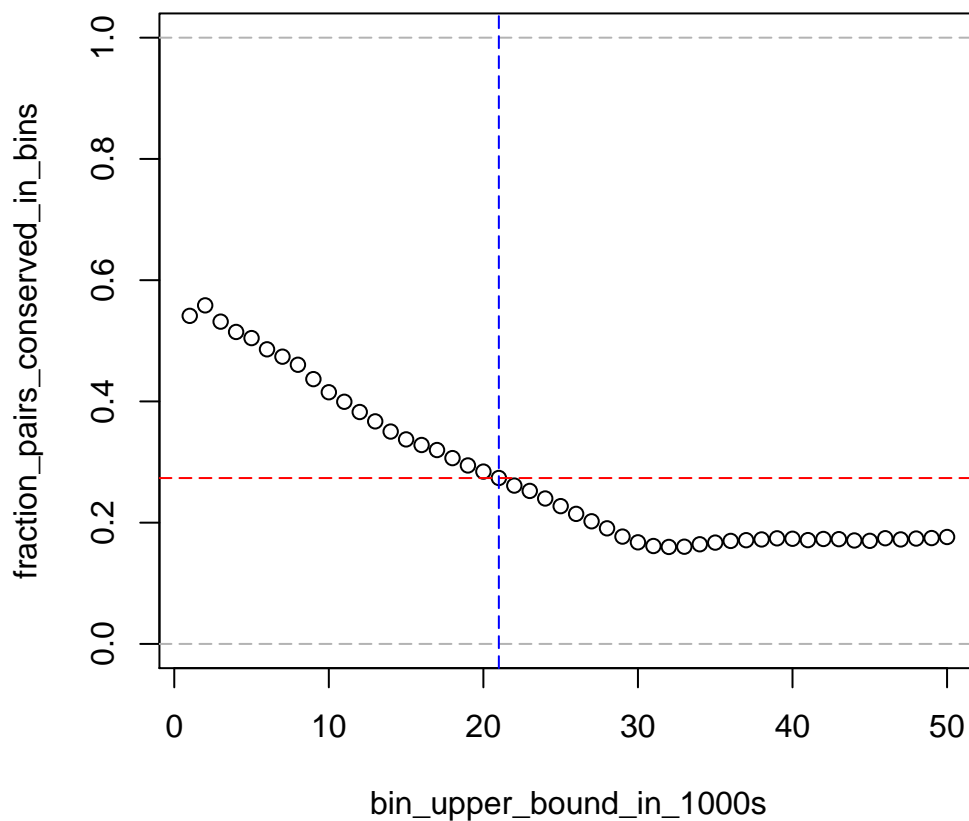

Supplement: s1 [file s1]

**Bin\_conservation\_minus\_bg\_MT325\_vs\_PBCV1**  
**PD-0.633689**

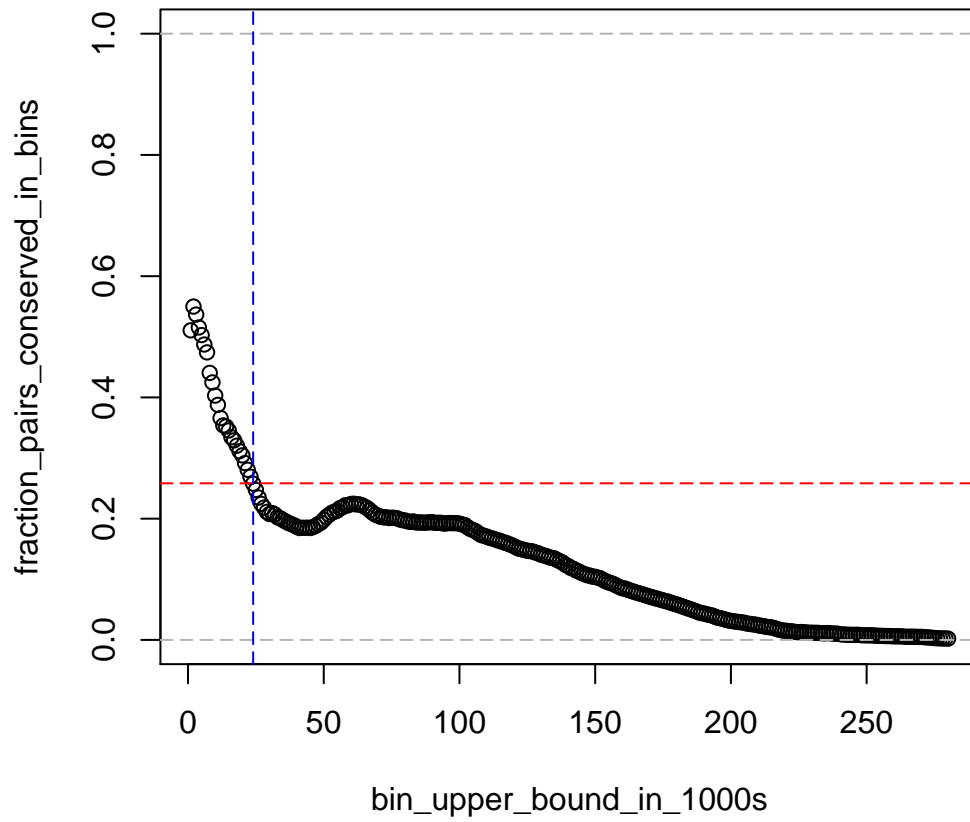

**Bin\_conservation\_minus\_bg\_MT325\_vs\_PBCV1**  
**PD-0.633689**

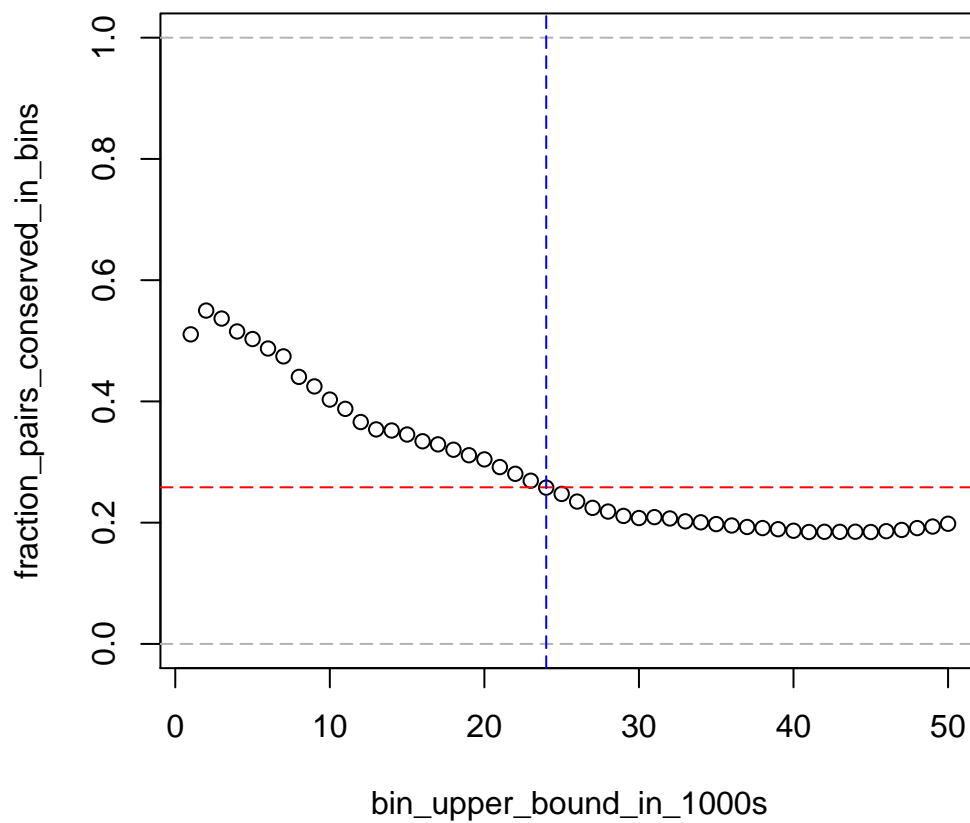

Supplement: s1 [file s1]

**Bin\_conservation\_minus\_bg\_CVM-1\_vs\_Fr5L**  
**PD-0.035176**

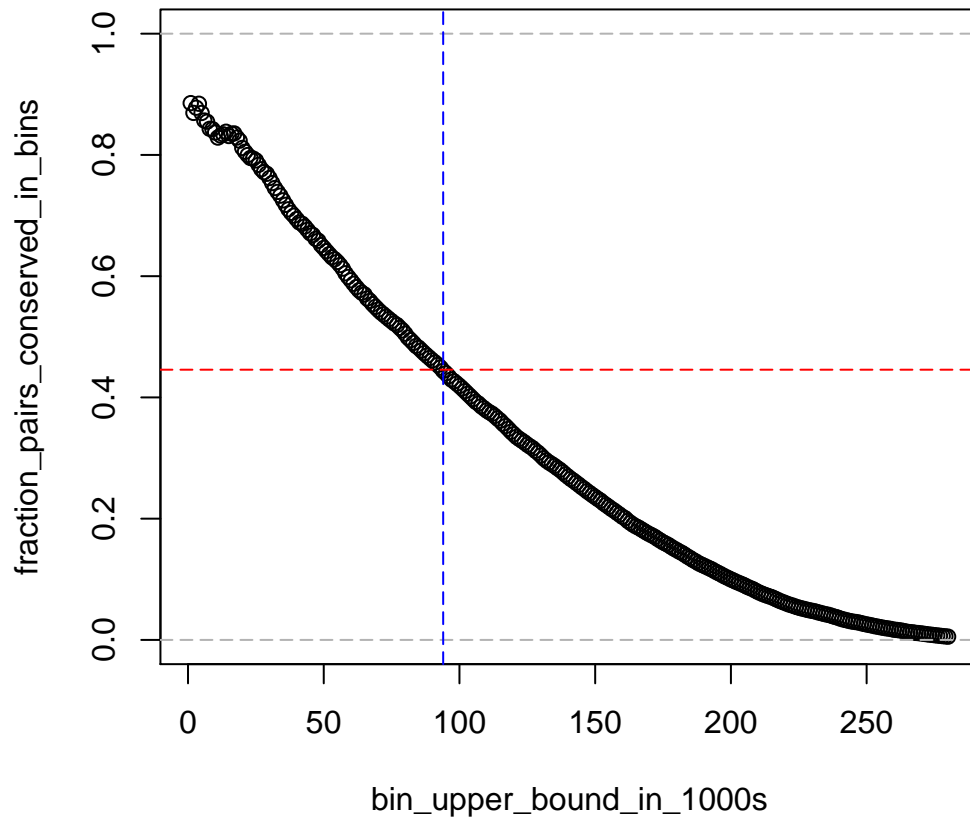

**Bin\_conservation\_minus\_bg\_CVM-1\_vs\_Fr5L**  
**PD-0.035176**

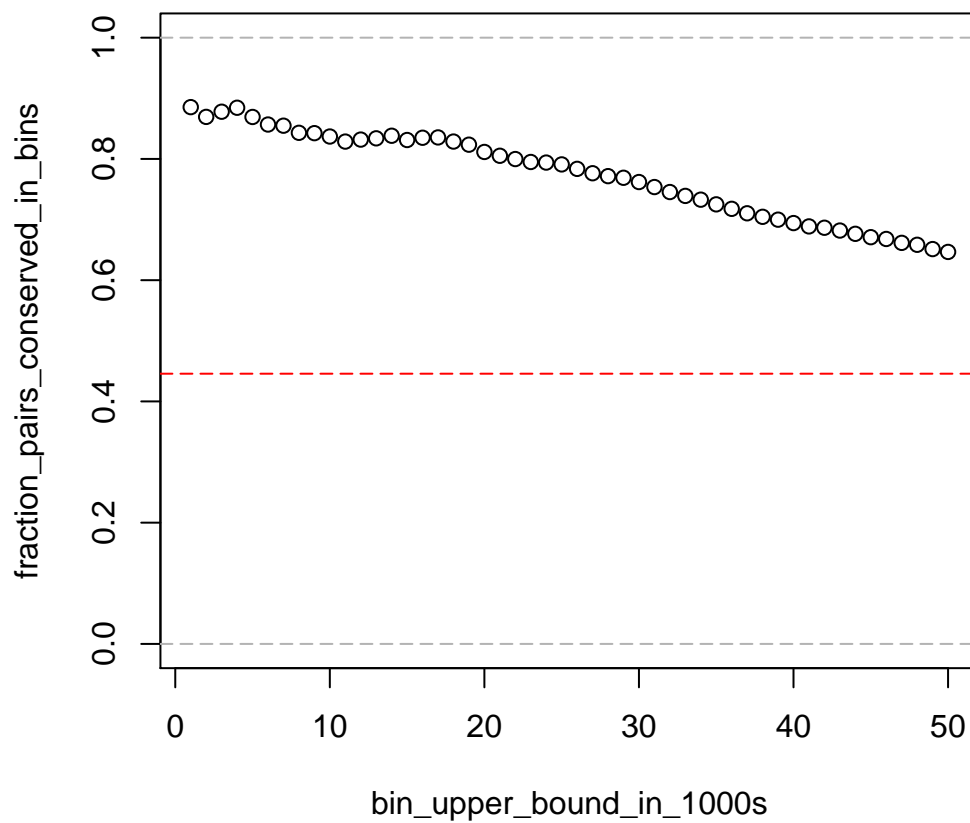

Supplement: s1 [file s1]

**Bin\_conservation\_minus\_bg\_IL-5-2s1\_vs\_NTS-1**  
**PD-0.698333**

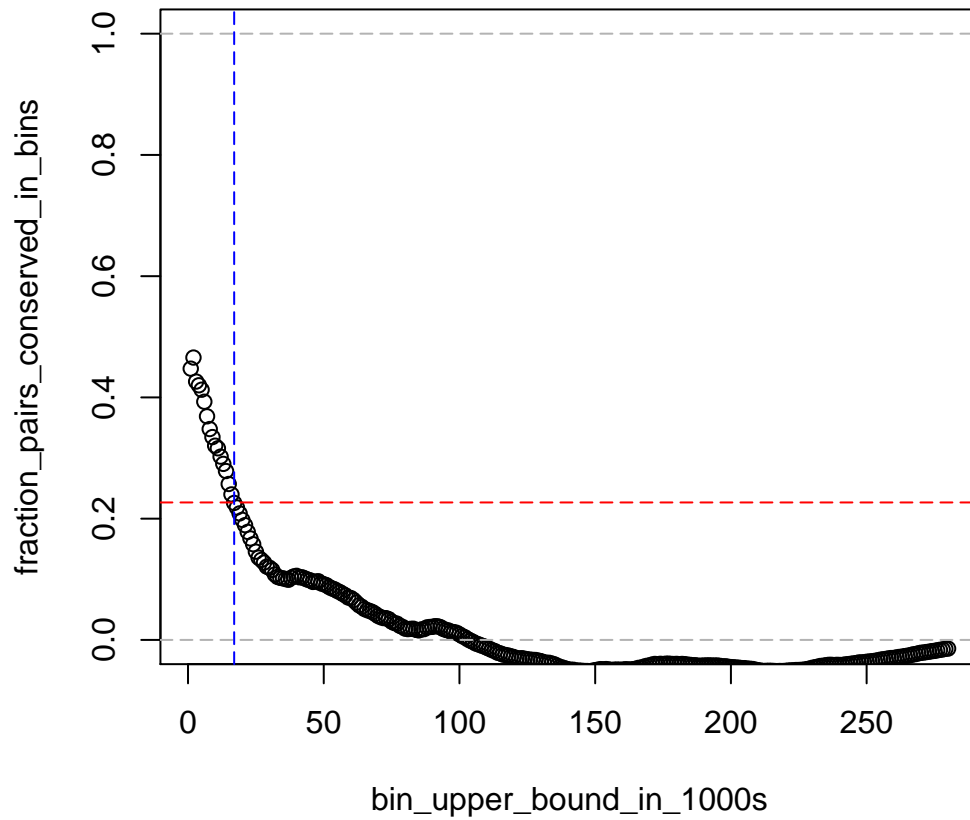

**Bin\_conservation\_minus\_bg\_IL-5-2s1\_vs\_NTS-1**  
**PD-0.698333**

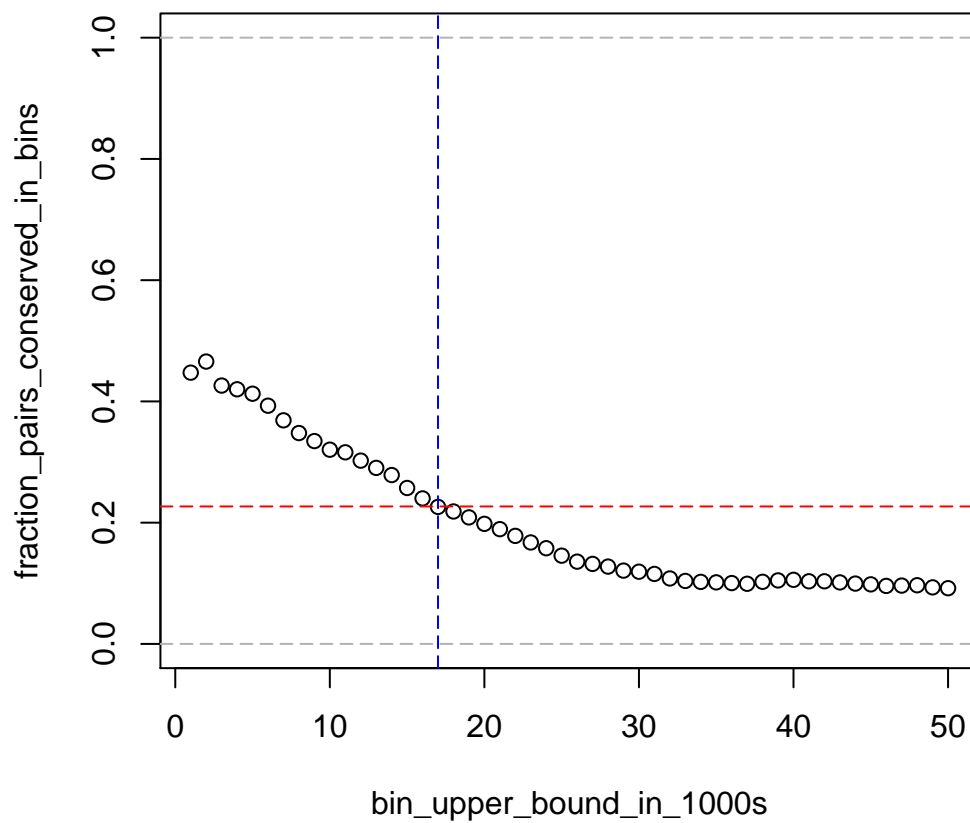

Supplement: s1 [file s1]

**Bin\_conservation\_minus\_bg\_MA-1E\_vs\_NE-JV-1**  
**PD-0.68647**

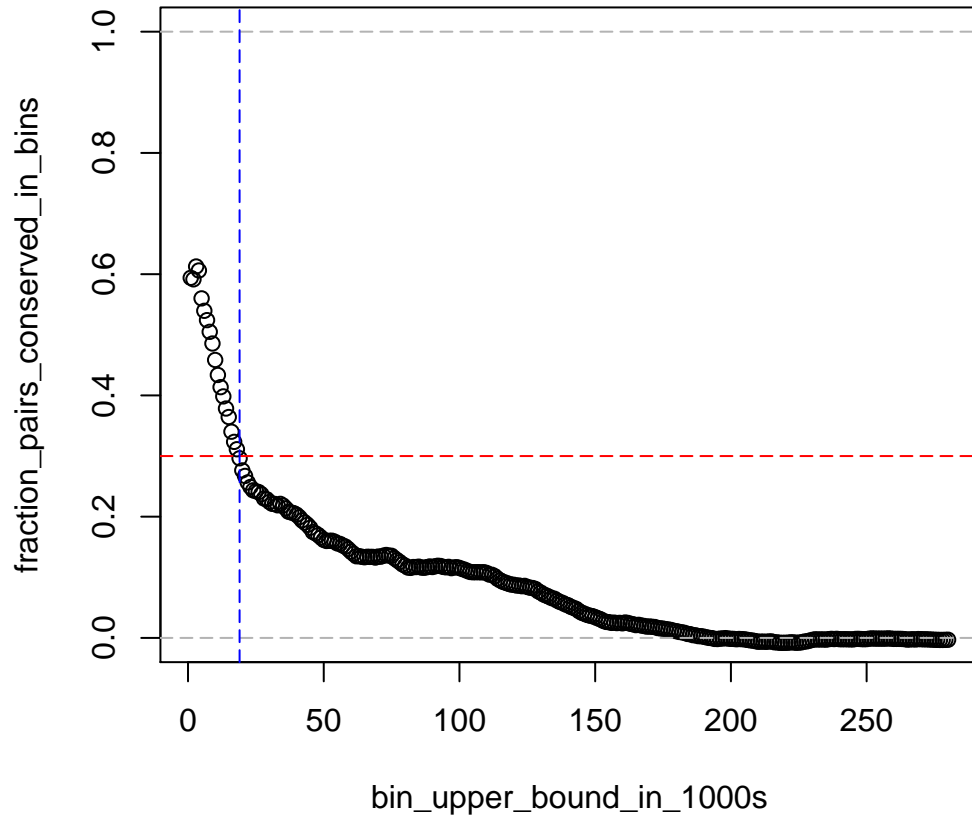

**Bin\_conservation\_minus\_bg\_MA-1E\_vs\_NE-JV-1**  
**PD-0.68647**

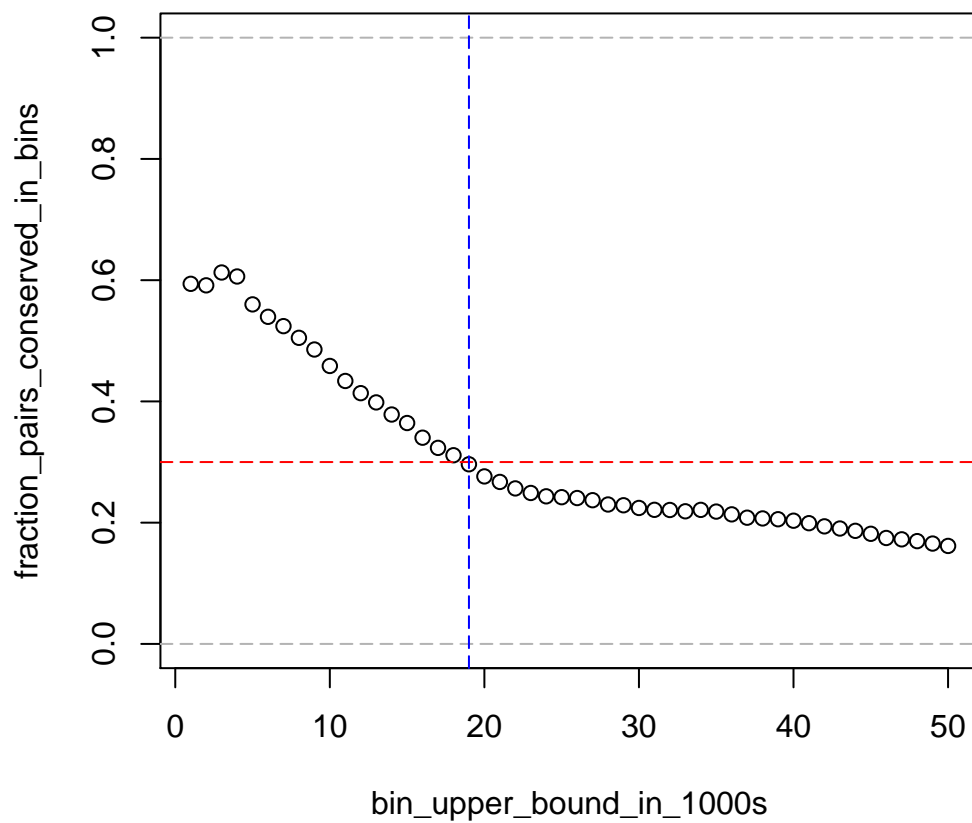

Supplement: s1 [file s1]

**Bin\_conservation\_minus\_bg\_AP110A\_vs\_NW665.2**  
**PD-0.021426**

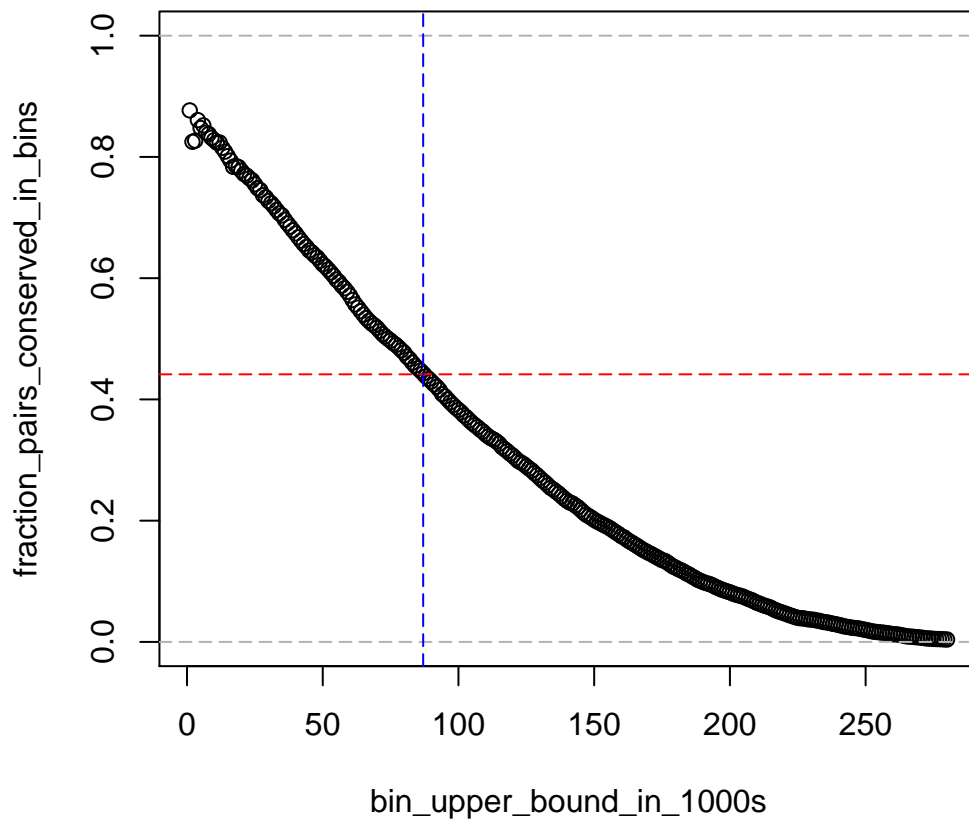

**Bin\_conservation\_minus\_bg\_AP110A\_vs\_NW665.2**  
**PD-0.021426**

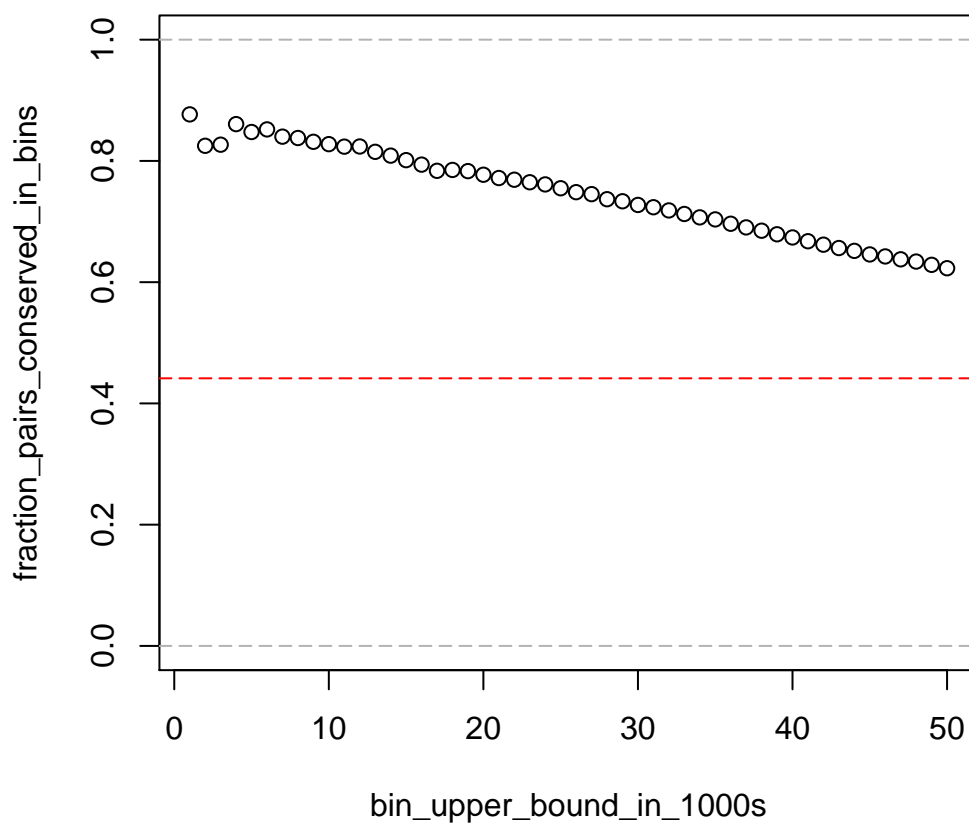

Supplement: s1 [file s1]

**Bin\_conservation\_minus\_bg\_Fr5L\_vs\_KS1B**  
**PD-0.65051**

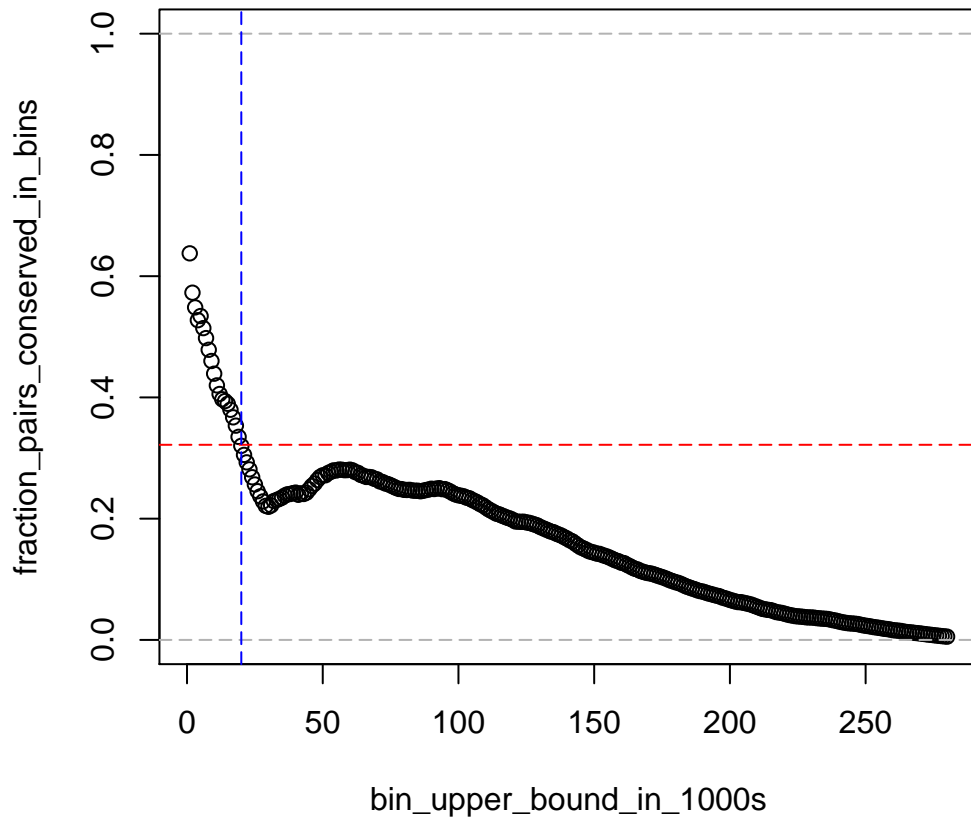

**Bin\_conservation\_minus\_bg\_Fr5L\_vs\_KS1B**  
**PD-0.65051**

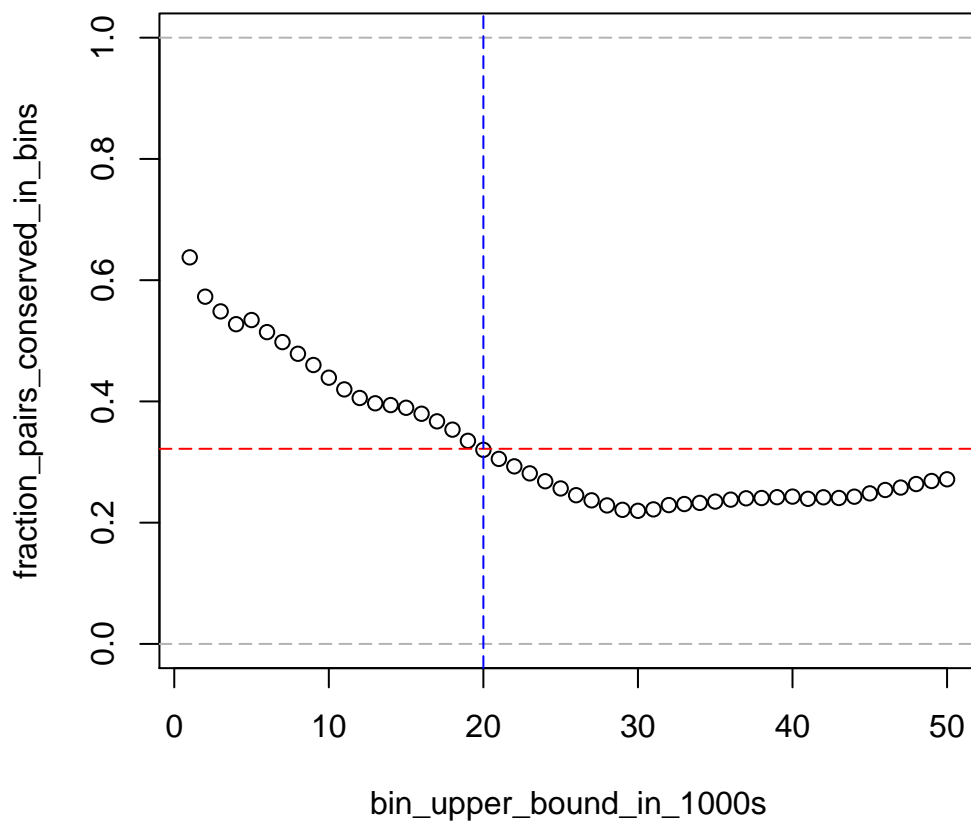

Supplement: s1 [file s1]

**Bin\_conservation\_minus\_bg\_CVG-1\_vs\_KS1B**  
**PD-0.653132**

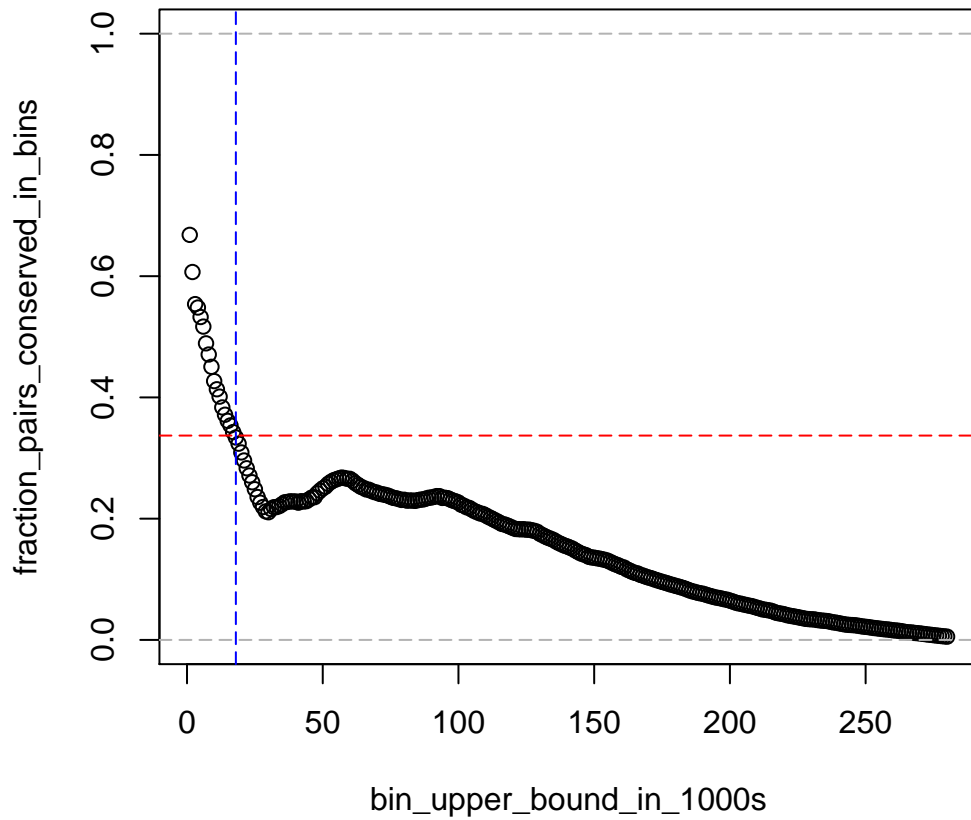

**Bin\_conservation\_minus\_bg\_CVG-1\_vs\_KS1B**  
**PD-0.653132**

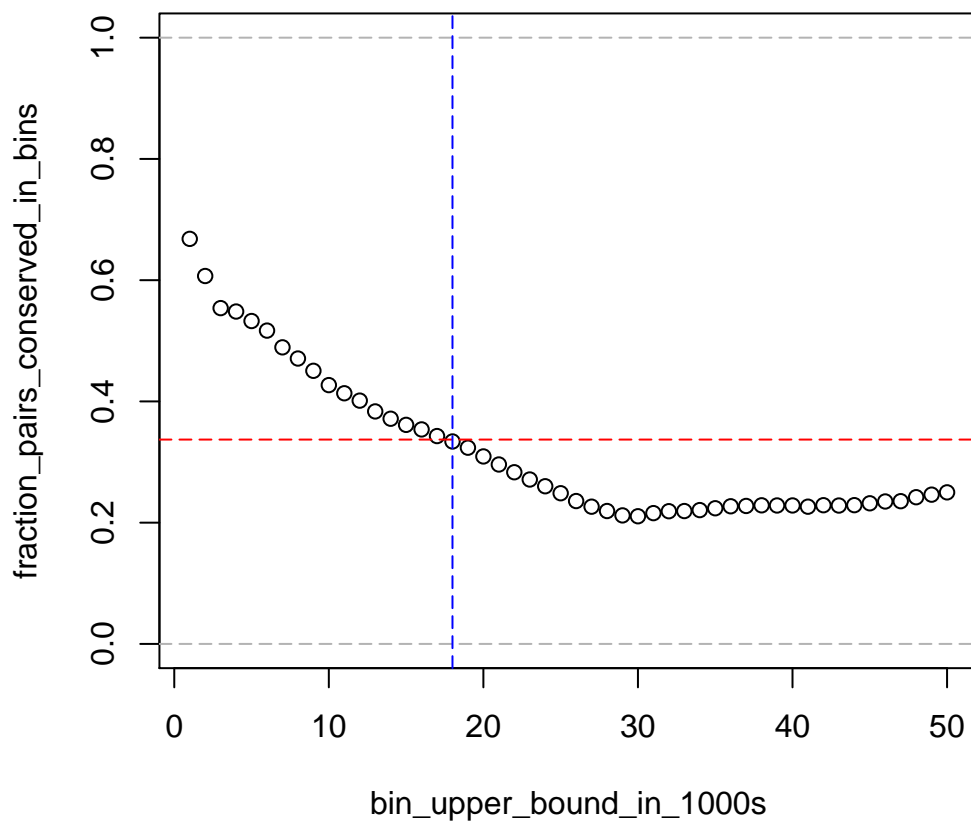

Supplement: s1 [file s1]

**Bin\_conservation\_minus\_bg\_AN69C\_vs\_Br0604L**  
**PD-0.667479**

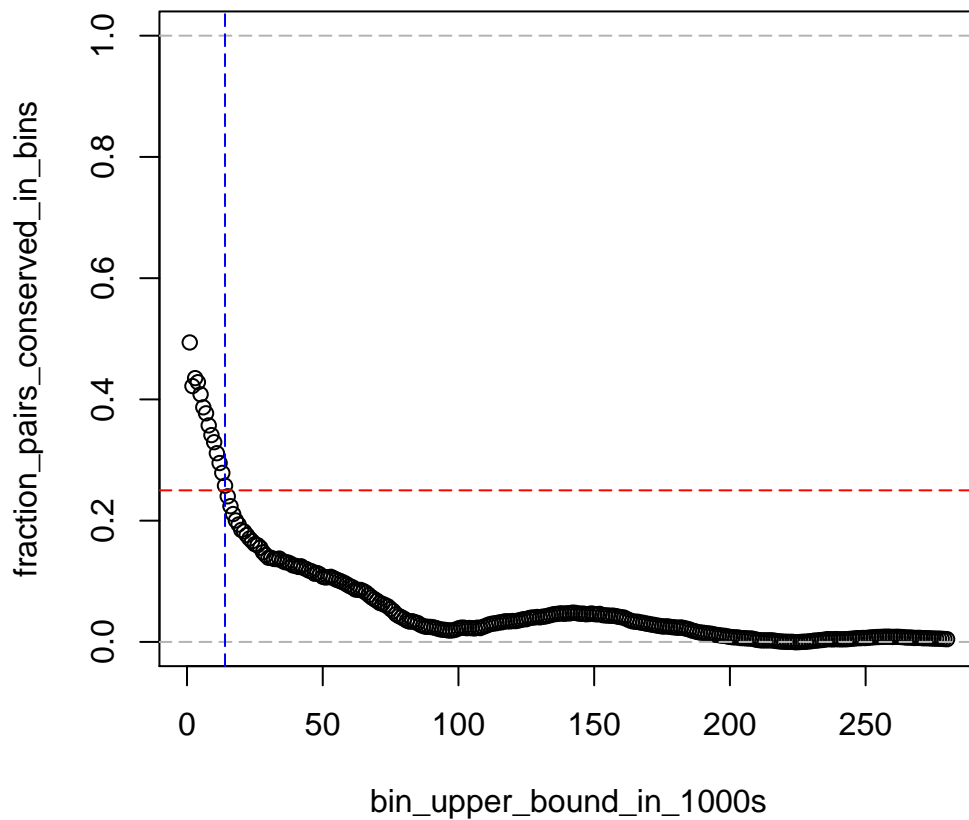

**Bin\_conservation\_minus\_bg\_AN69C\_vs\_Br0604L**  
**PD-0.667479**

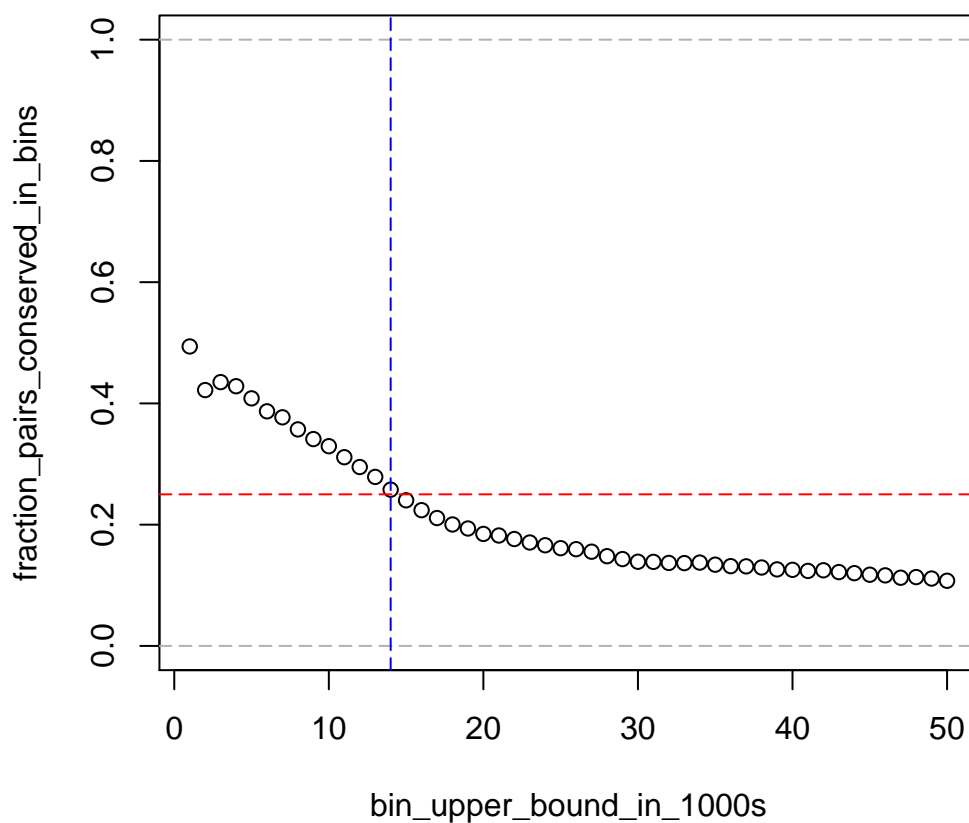

Supplement: s1 [file s1]

**Bin\_conservation\_minus\_bg\_CVR-1\_vs\_MO0605SPH**  
**PD-0.461122**

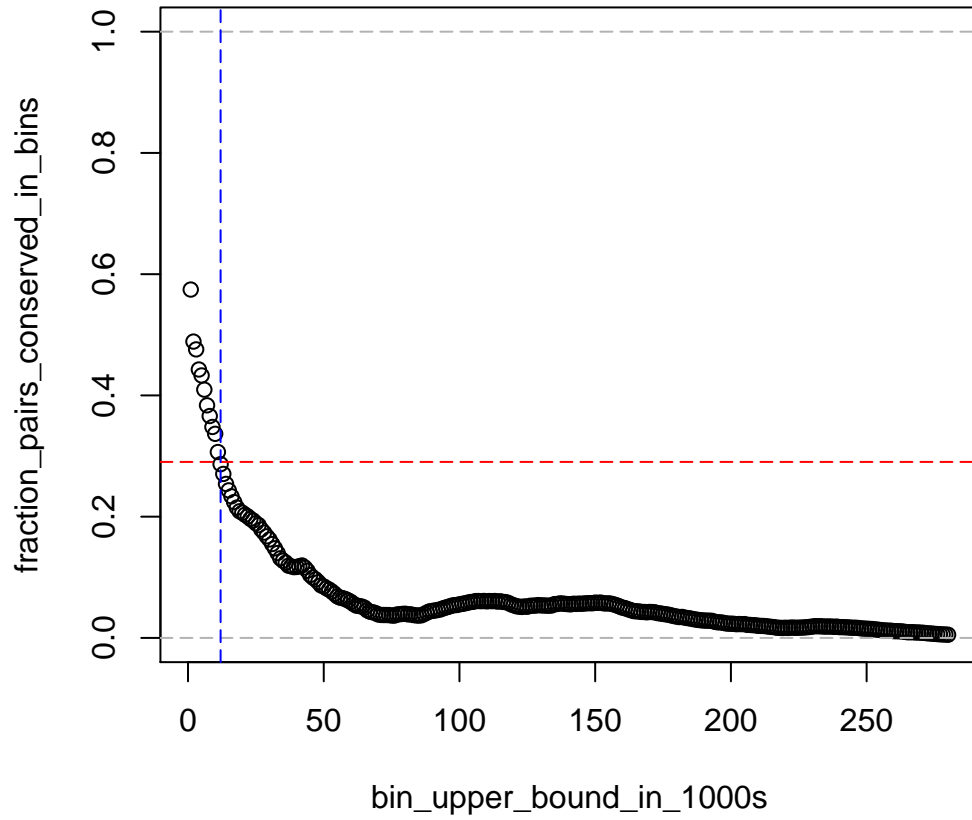

**Bin\_conservation\_minus\_bg\_CVR-1\_vs\_MO0605SPH**  
**PD-0.461122**

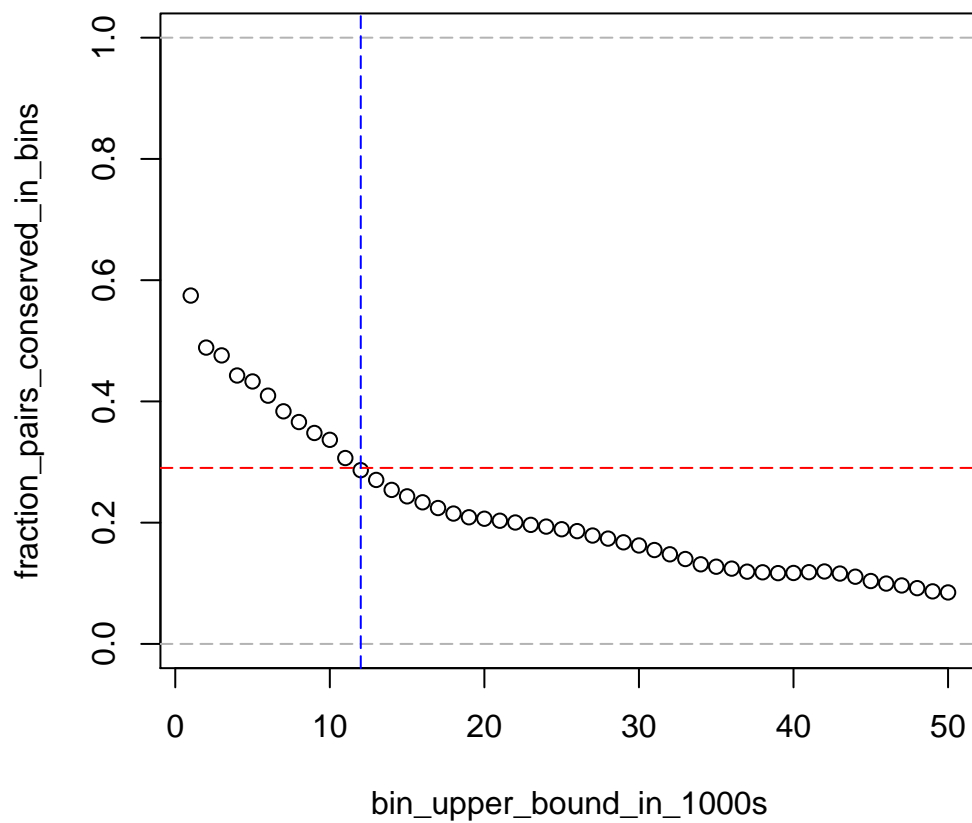

Supplement: s1 [file s1]

**Bin\_conservation\_minus\_bg\_NW665.2\_vs\_OR0704.3**  
**PD-0.463482**

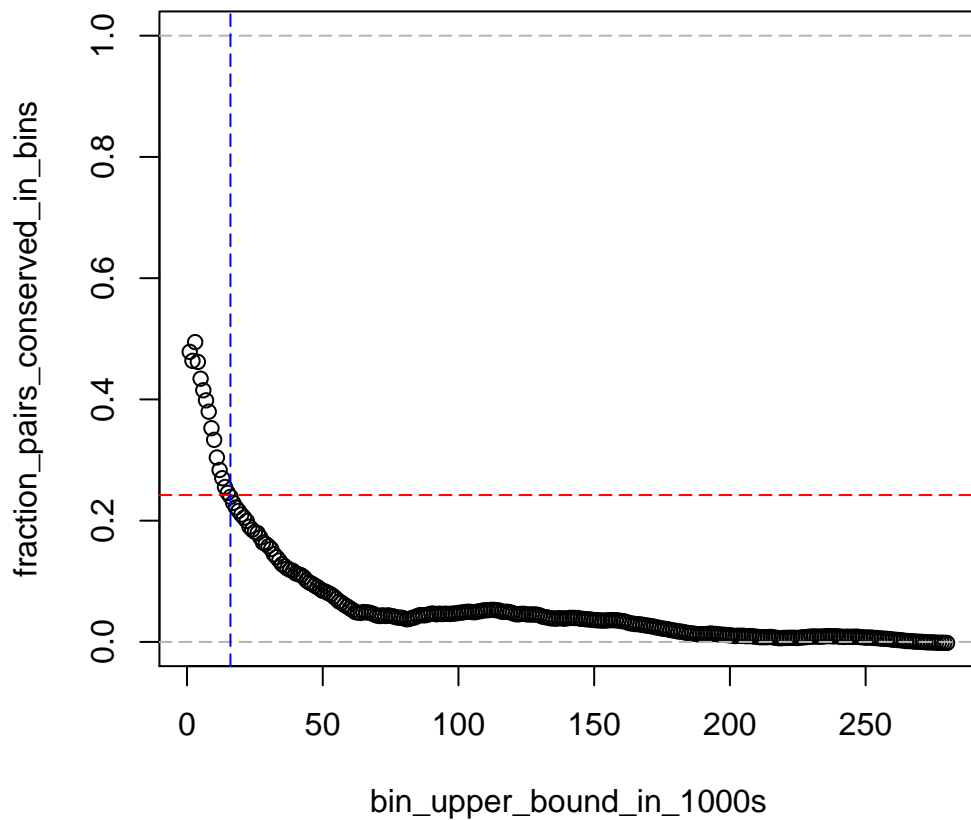

**Bin\_conservation\_minus\_bg\_NW665.2\_vs\_OR0704.3**  
**PD-0.463482**

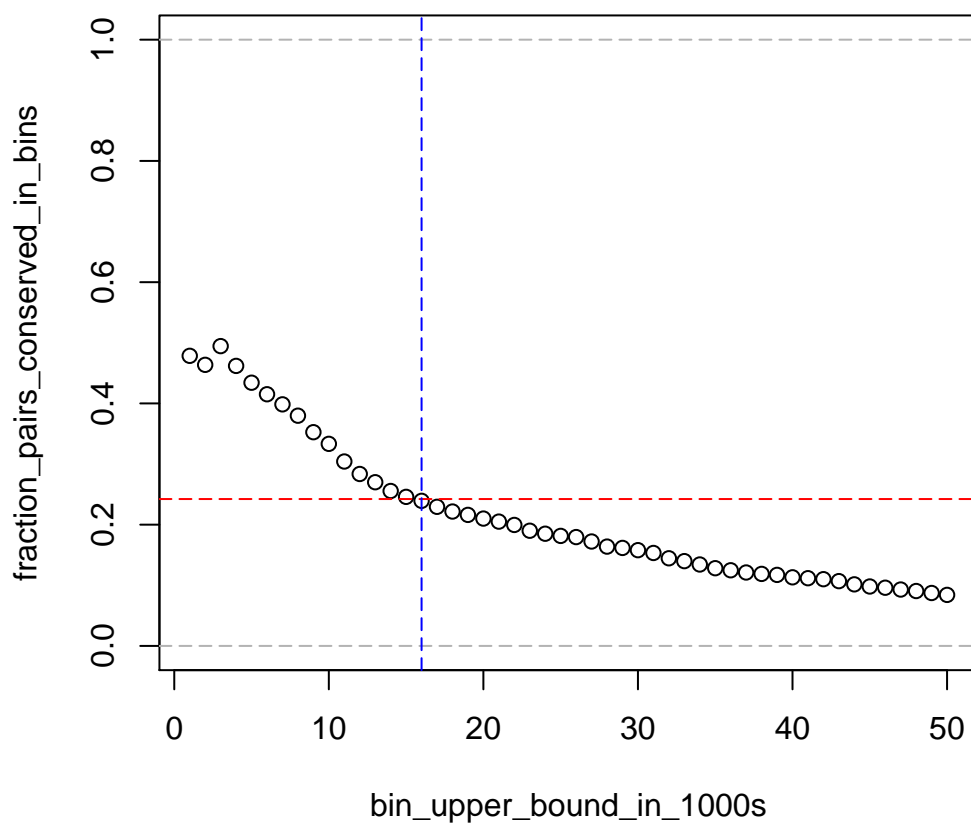

Supplement: s1 [file s1]

**Bin\_conservation\_minus\_bg\_AR158\_vs\_MA-1E**  
**PD-0.150771**

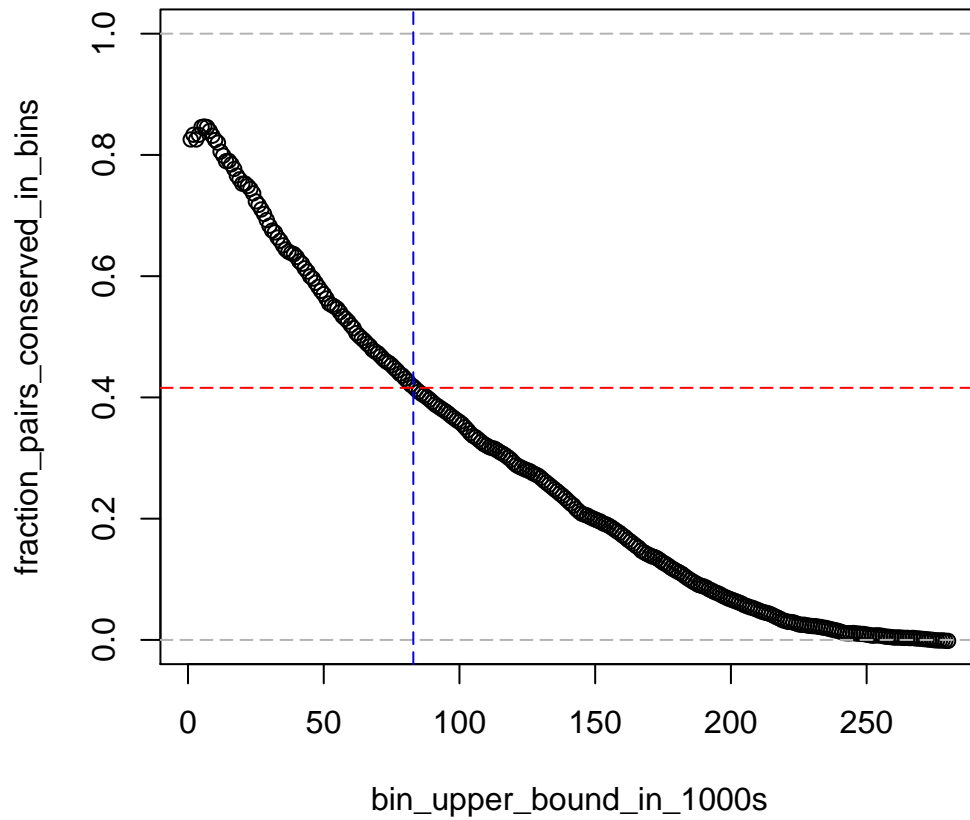

**Bin\_conservation\_minus\_bg\_AR158\_vs\_MA-1E**  
**PD-0.150771**

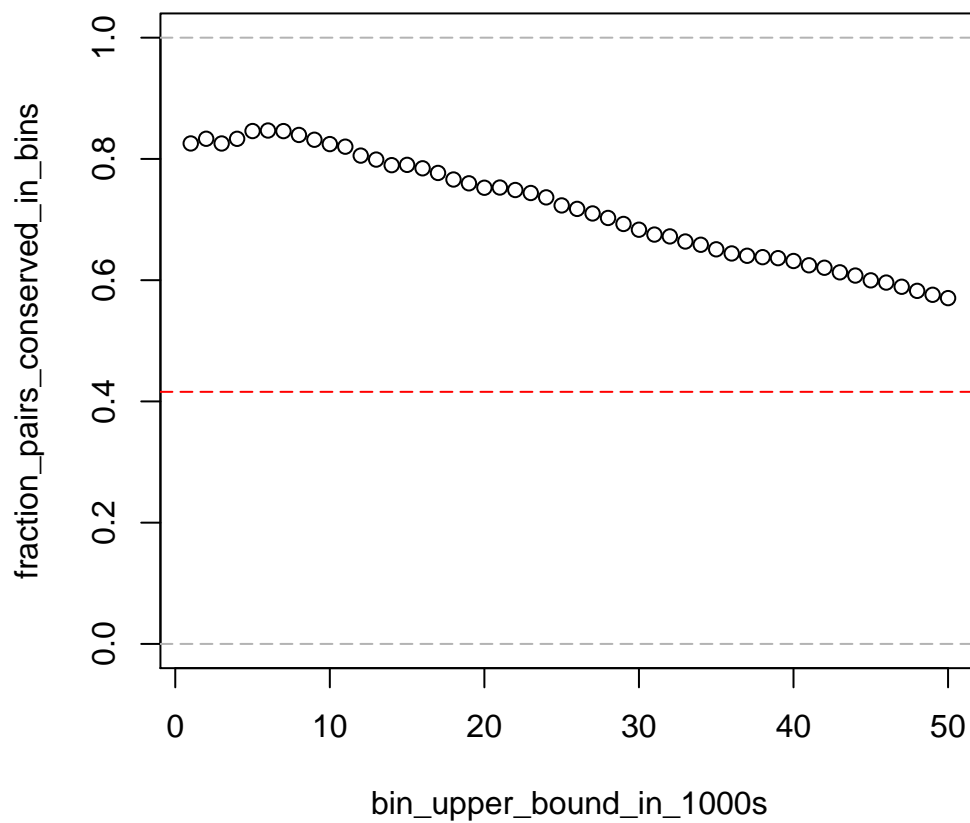

Supplement: s1 [file s1]

**Bin\_conservation\_minus\_bg\_Can0610SP\_vs\_MO0605SP**  
**PD-0.018247**

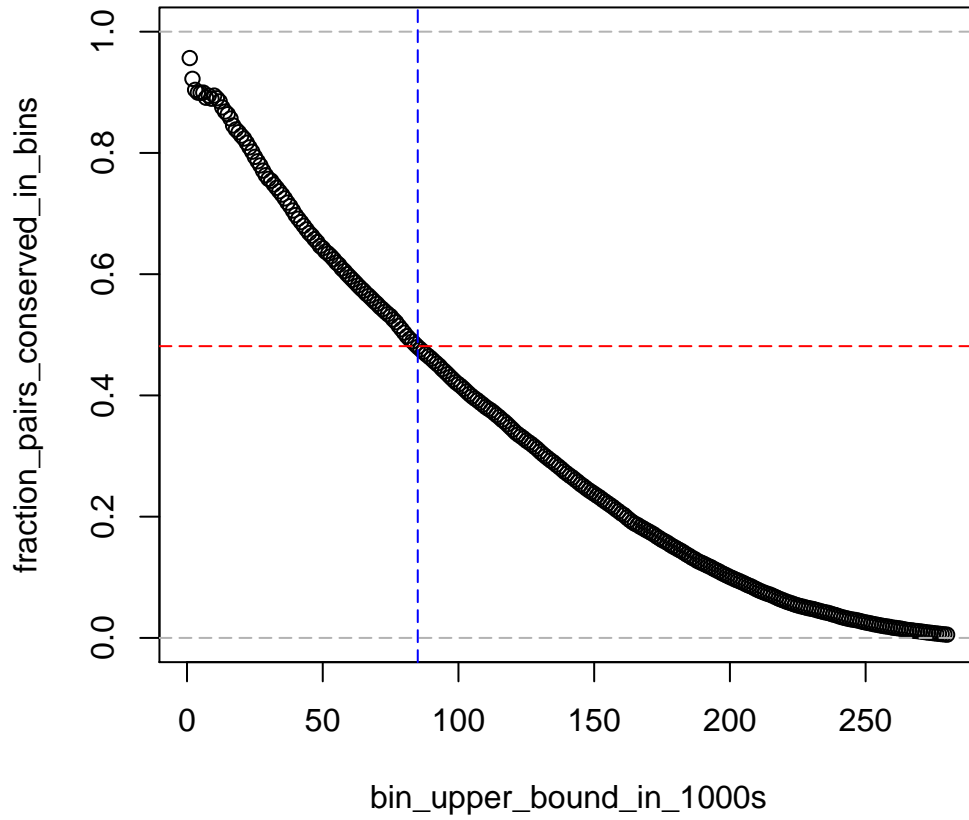

**Bin\_conservation\_minus\_bg\_Can0610SP\_vs\_MO0605SP**  
**PD-0.018247**

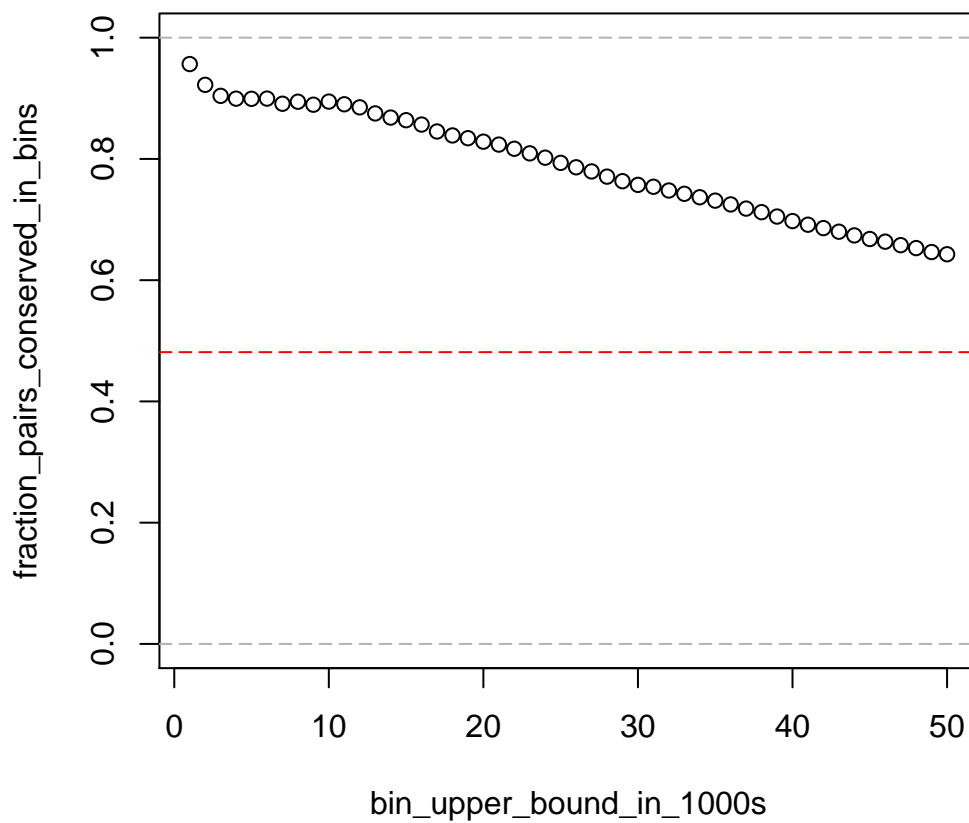

Supplement: s1 [file s1]

**Bin\_conservation\_minus\_bg\_MT325\_vs\_OR0704.3**  
**PD-0.45928**

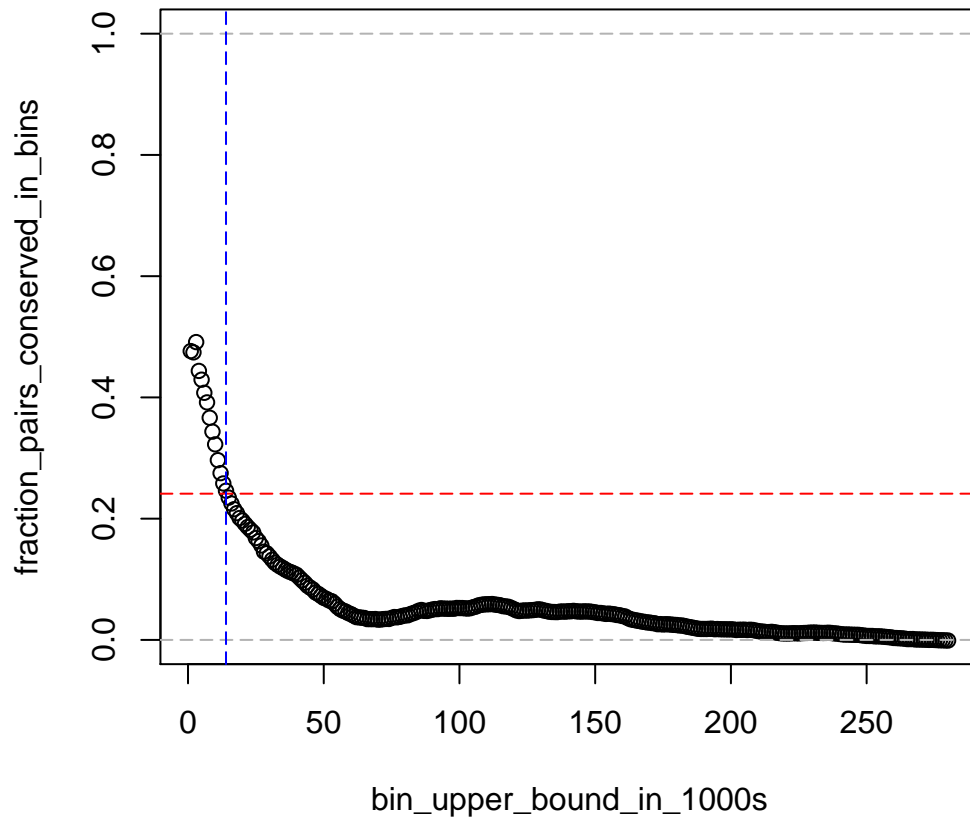

**Bin\_conservation\_minus\_bg\_MT325\_vs\_OR0704.3**  
**PD-0.45928**

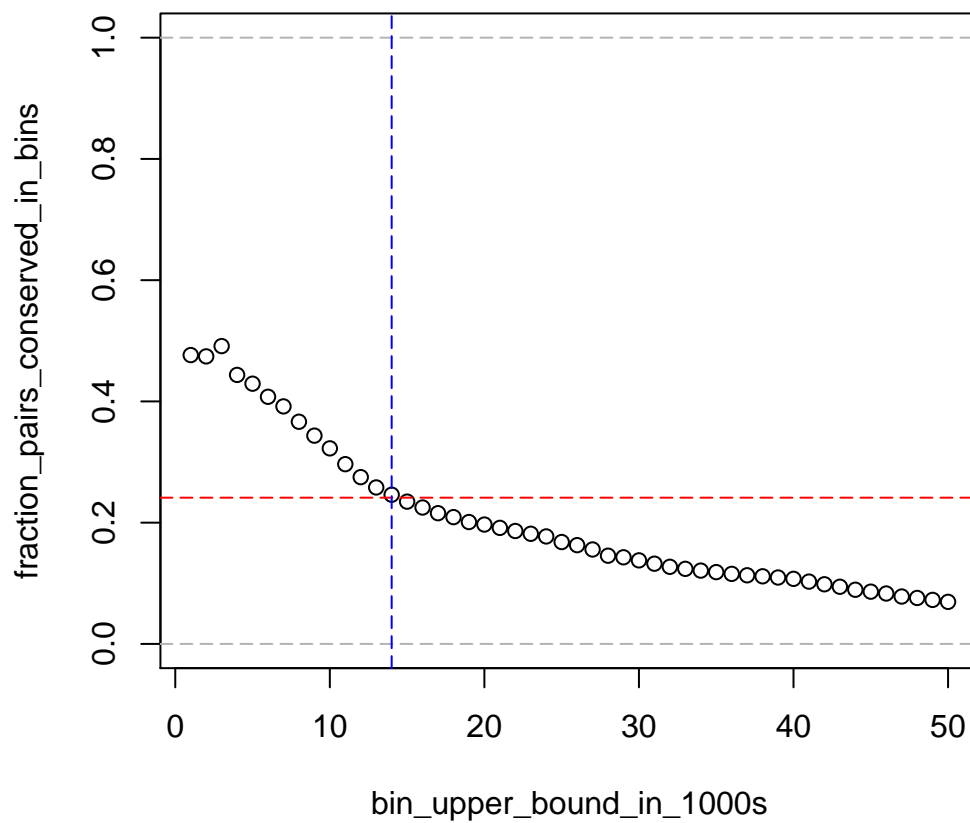

Supplement: s1 [file s1]

**Bin\_conservation\_minus\_bg\_CvsA1\_vs\_GM0701.1**  
**PD-0.684339**

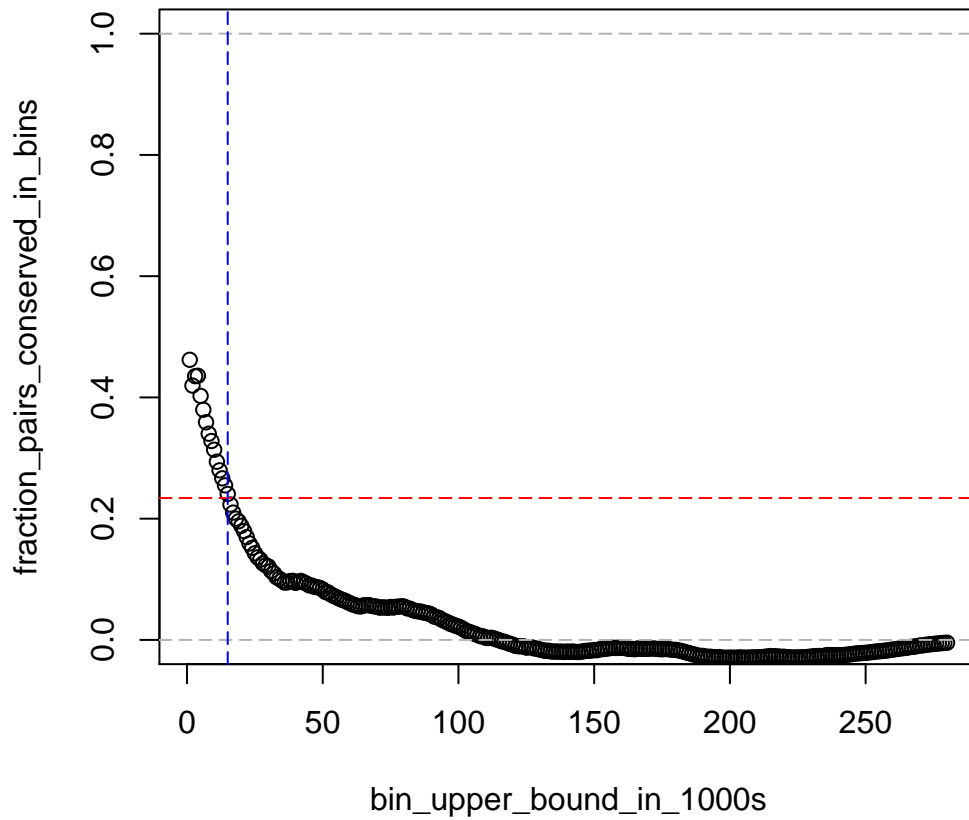

**Bin\_conservation\_minus\_bg\_CvsA1\_vs\_GM0701.1**  
**PD-0.684339**

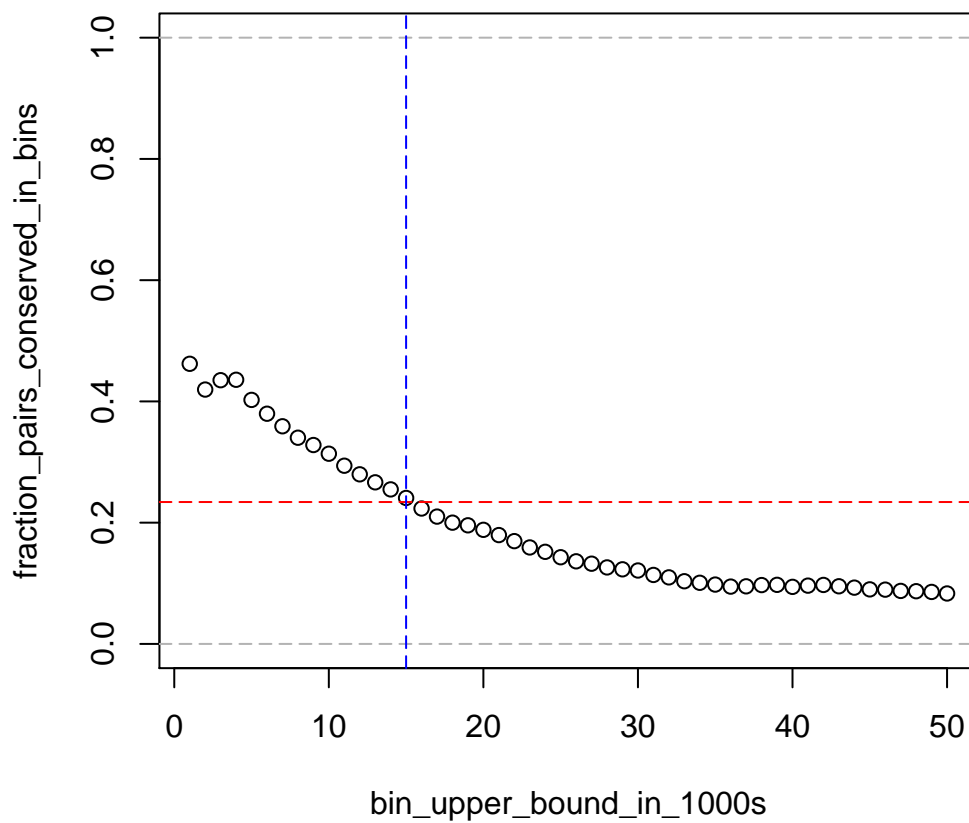

Supplement: s1 [file s1]

**Bin\_conservation\_minus\_bg\_MN0810.1\_vs\_MO0605SP1**  
**PD-0.114491**

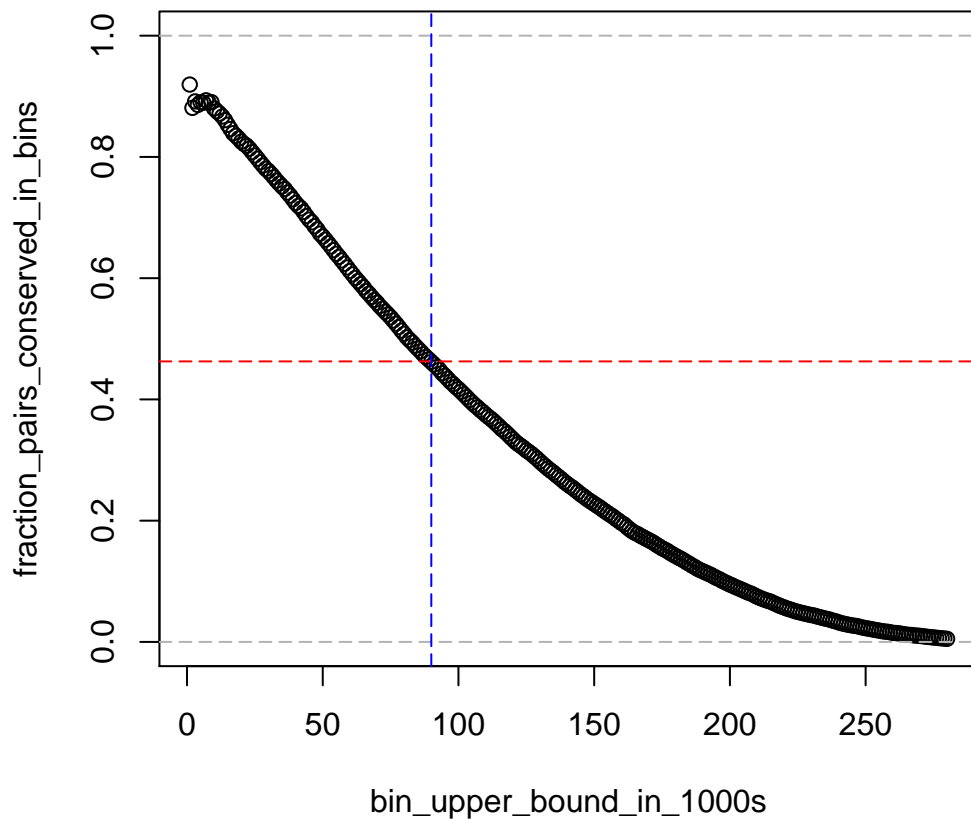

**Bin\_conservation\_minus\_bg\_MN0810.1\_vs\_MO0605SP1**  
**PD-0.114491**

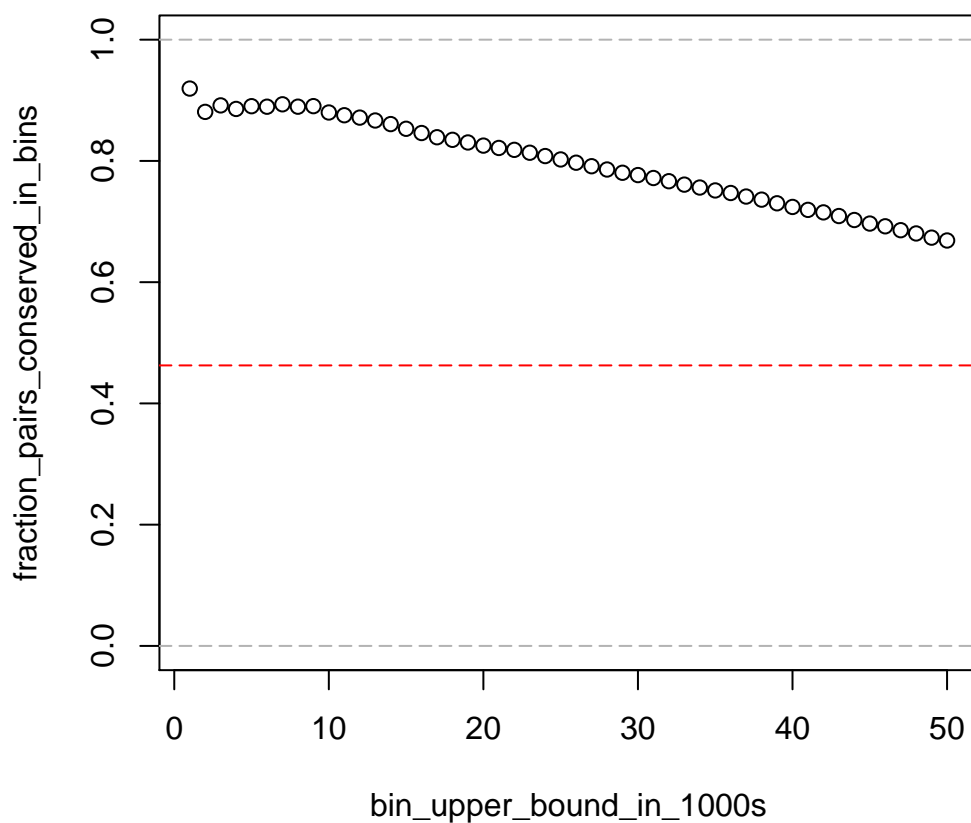

Supplement: s1 [file s1]

**Bin\_conservation\_minus\_bg\_AN69C\_vs\_AP110A**  
**PD-0.638673**

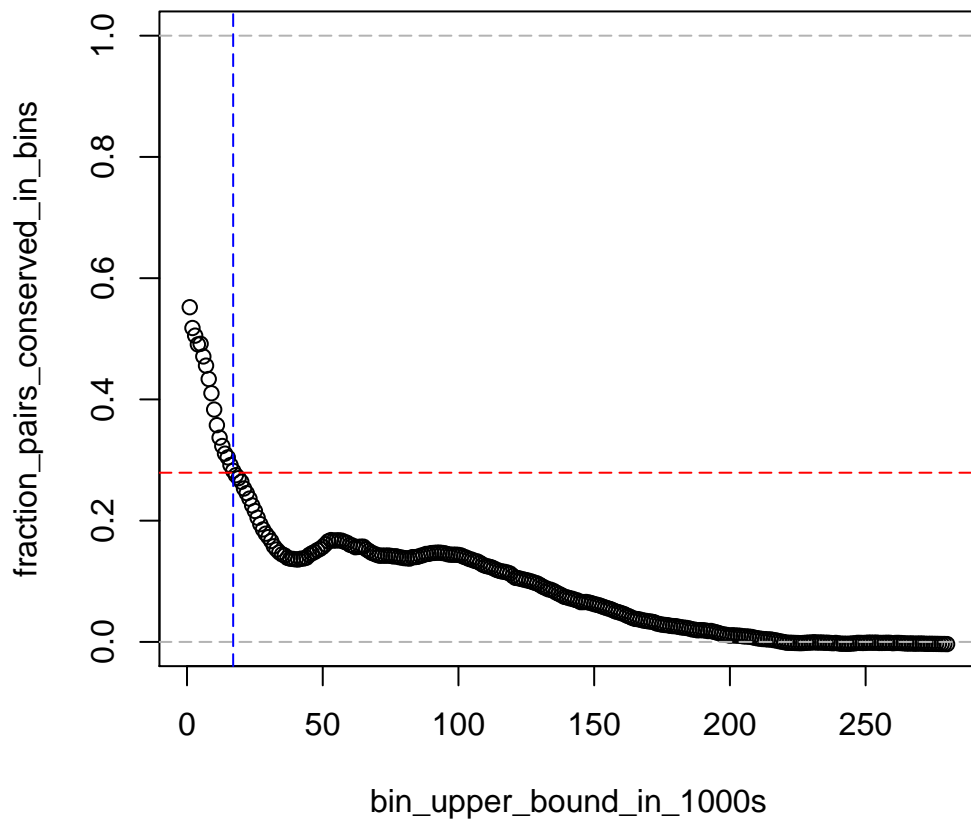

**Bin\_conservation\_minus\_bg\_AN69C\_vs\_AP110A**  
**PD-0.638673**

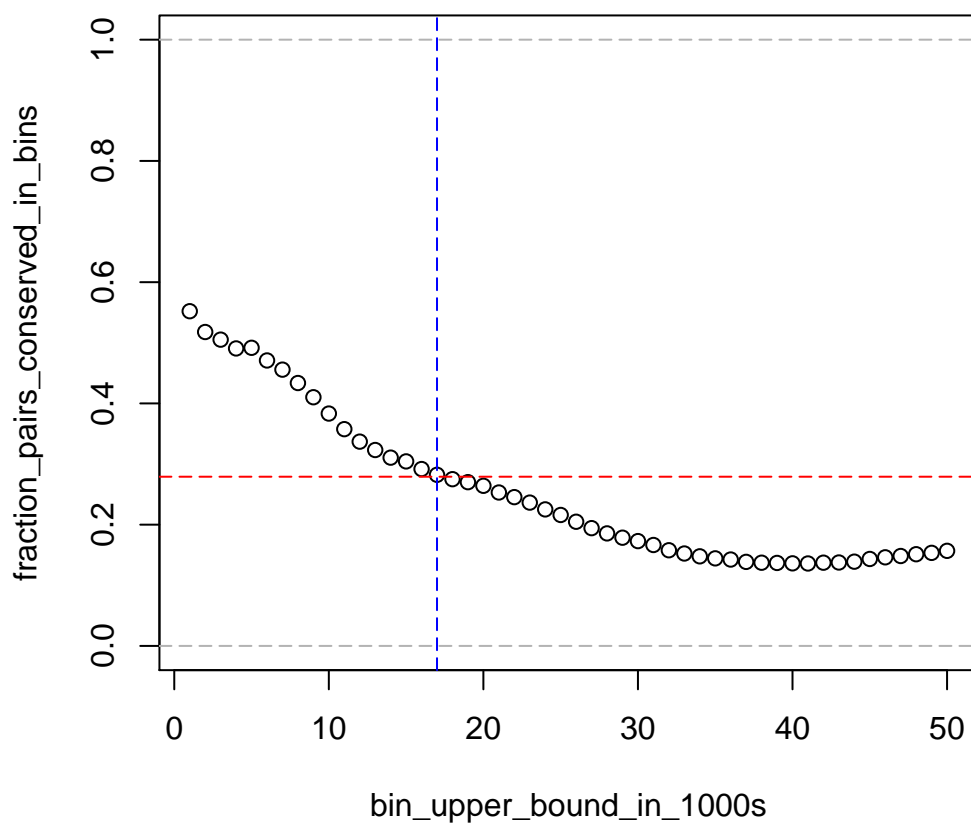

Supplement: s1 [file s1]

**Bin\_conservation\_minus\_bg\_CVM-1\_vs\_NW665.2**  
**PD-0.01825**

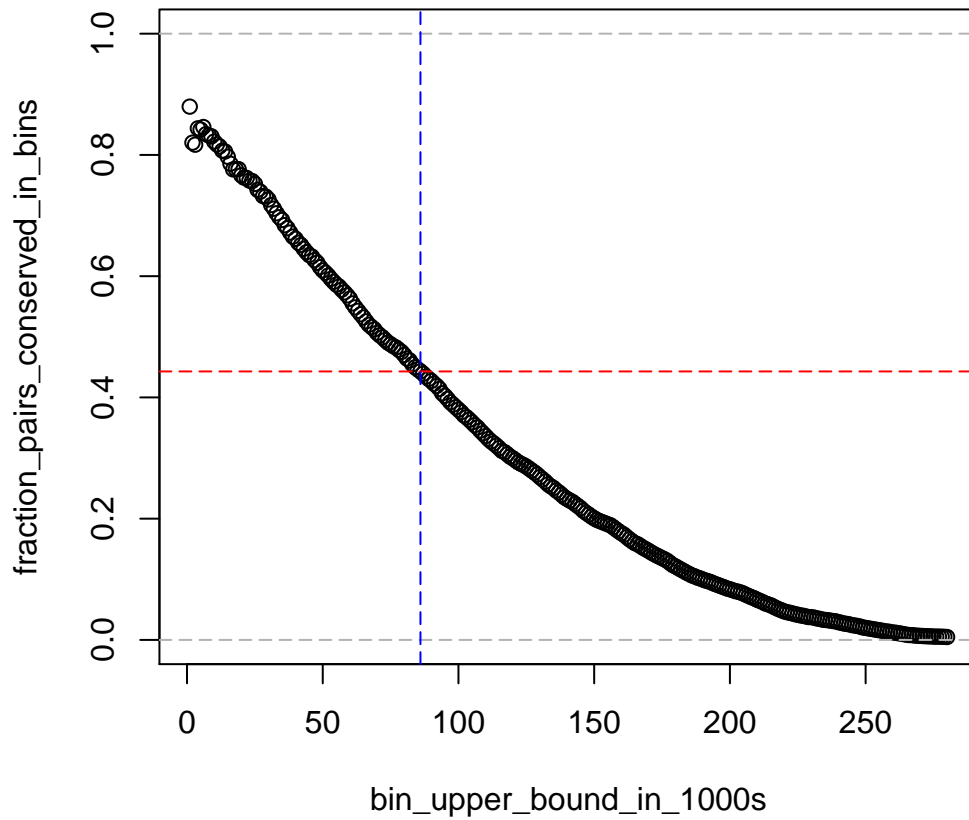

**Bin\_conservation\_minus\_bg\_CVM-1\_vs\_NW665.2**  
**PD-0.01825**

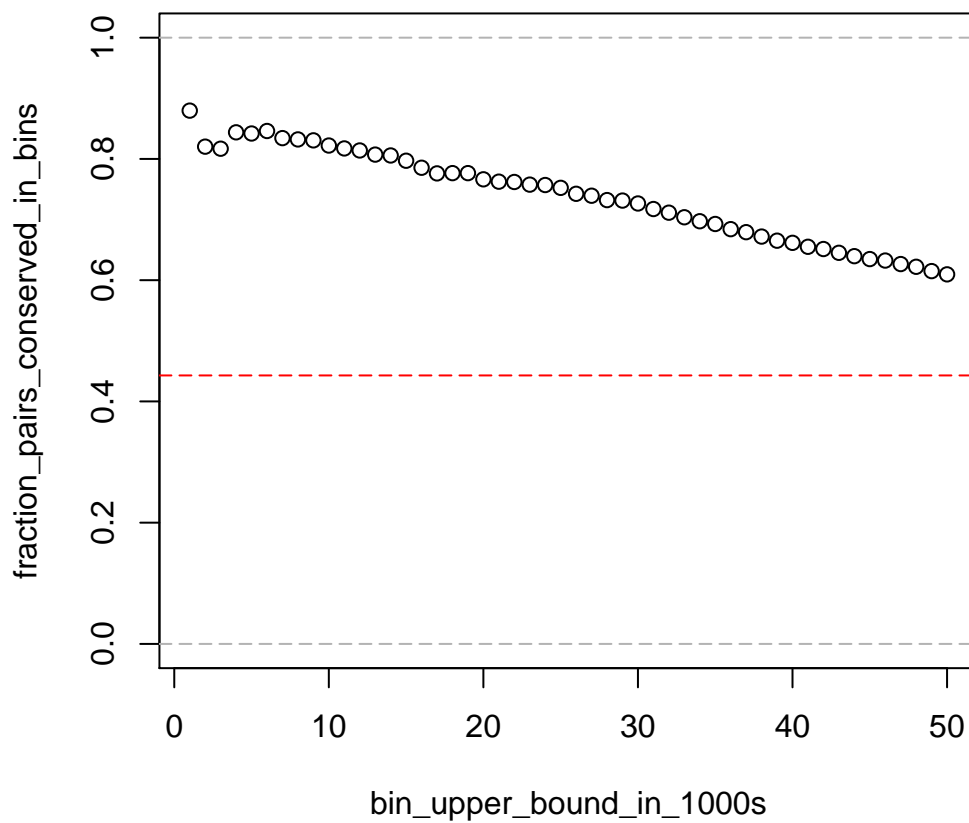

Supplement: s1 [file s1]

**Bin\_conservation\_minus\_bg\_CviKI\_vs\_NW665.2**  
**PD-0.654705**

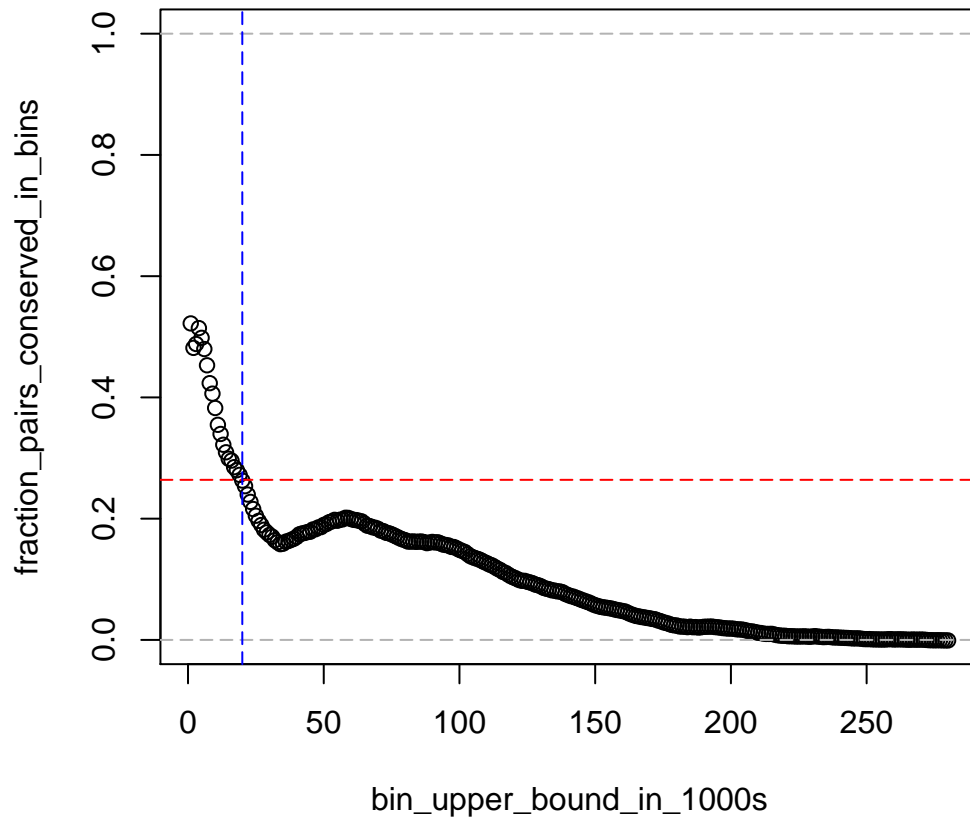

**Bin\_conservation\_minus\_bg\_CviKI\_vs\_NW665.2**  
**PD-0.654705**

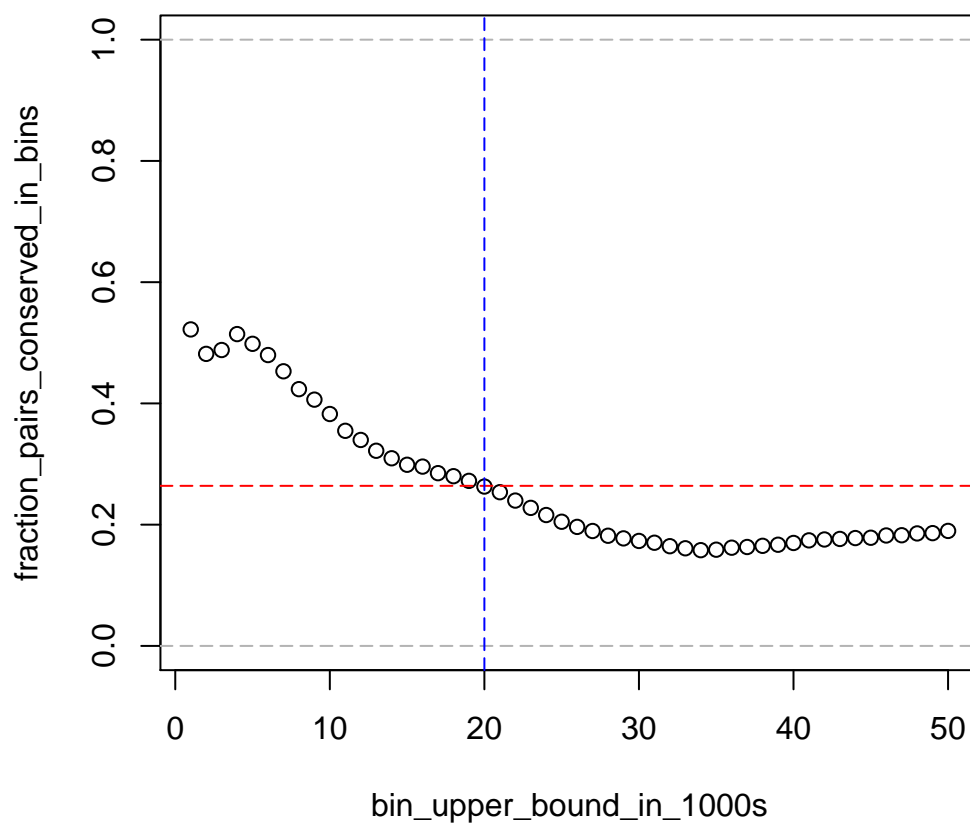

Supplement: s1 [file s1]

**Bin\_conservation\_minus\_bg\_CVA-1\_vs\_IL-3A**  
**PD-0.636701**

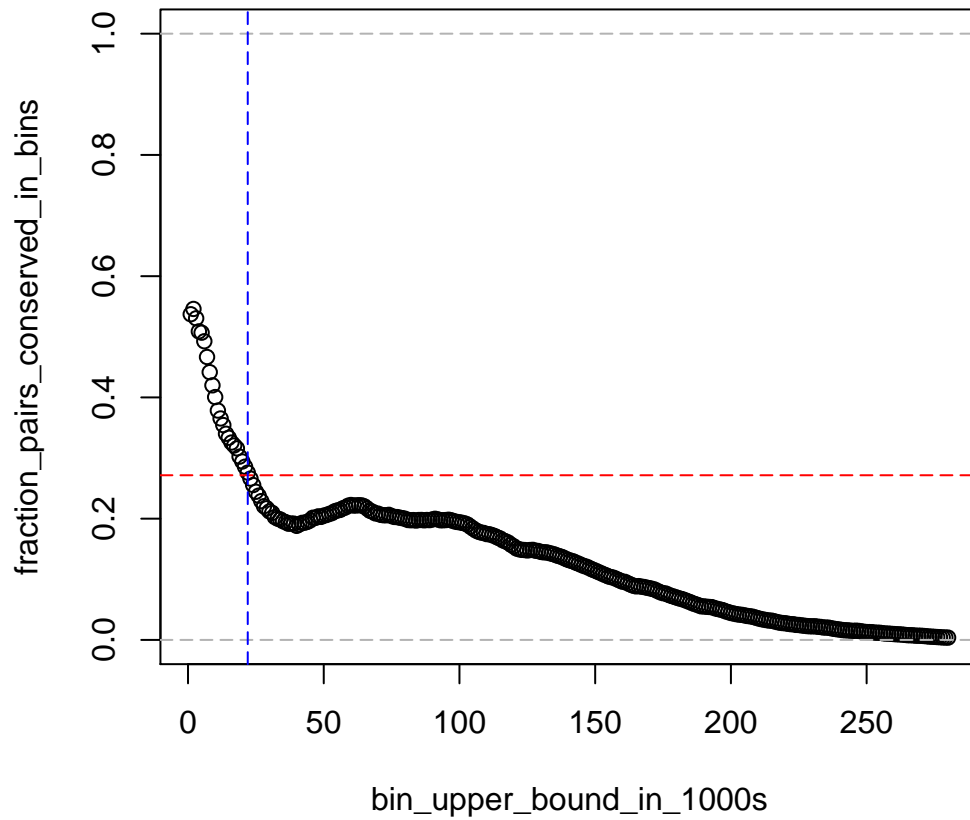

**Bin\_conservation\_minus\_bg\_CVA-1\_vs\_IL-3A**  
**PD-0.636701**

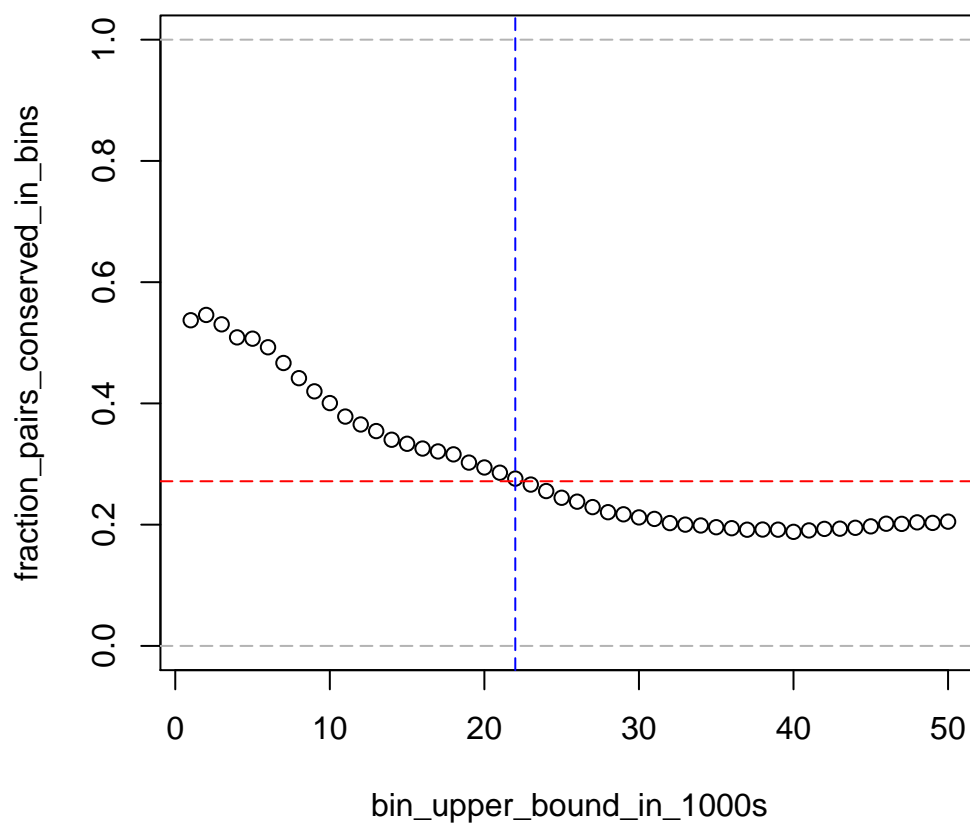

Supplement: s1 [file s1]

**Bin\_conservation\_minus\_bg\_NE-JV-4\_vs\_NW665.2**  
**PD-0.642794**

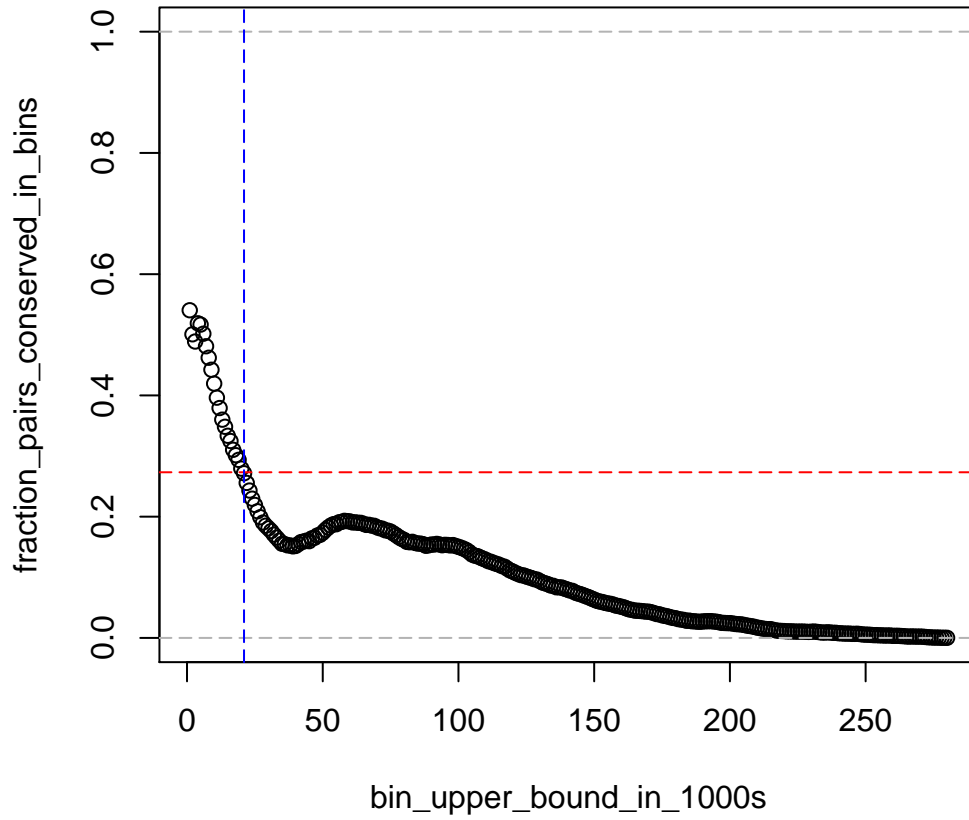

**Bin\_conservation\_minus\_bg\_NE-JV-4\_vs\_NW665.2**  
**PD-0.642794**

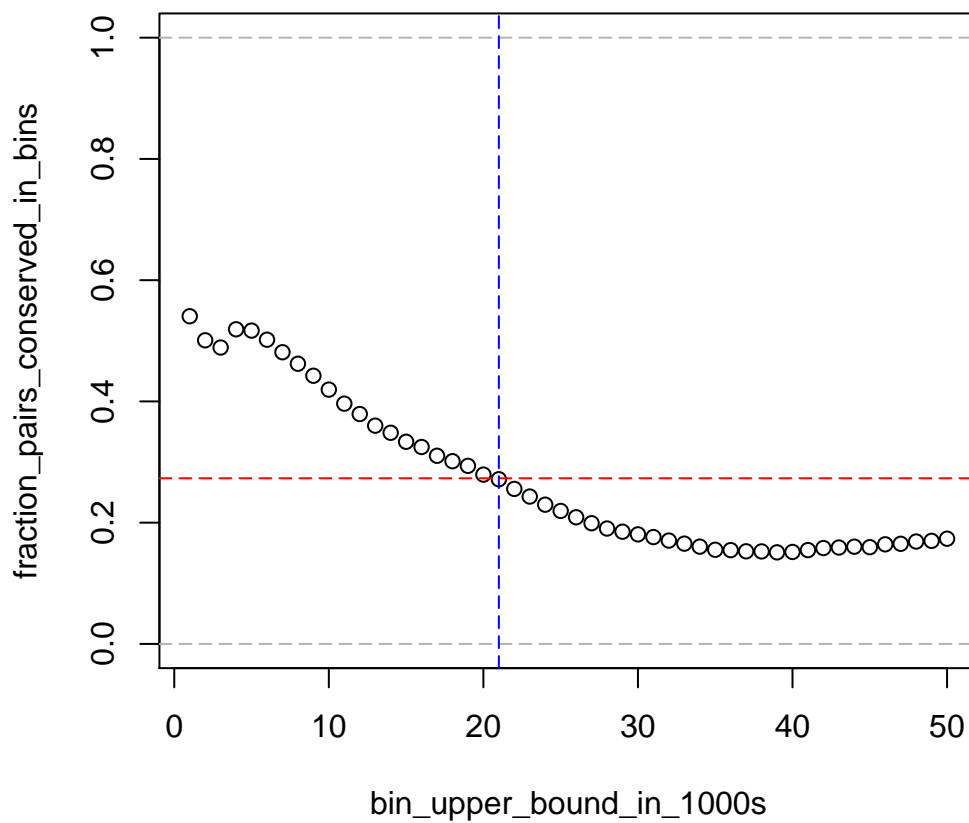

Supplement: s1 [file s1]

**Bin\_conservation\_minus\_bg\_Br0604L\_vs\_FR483**  
**PD-0.454355**

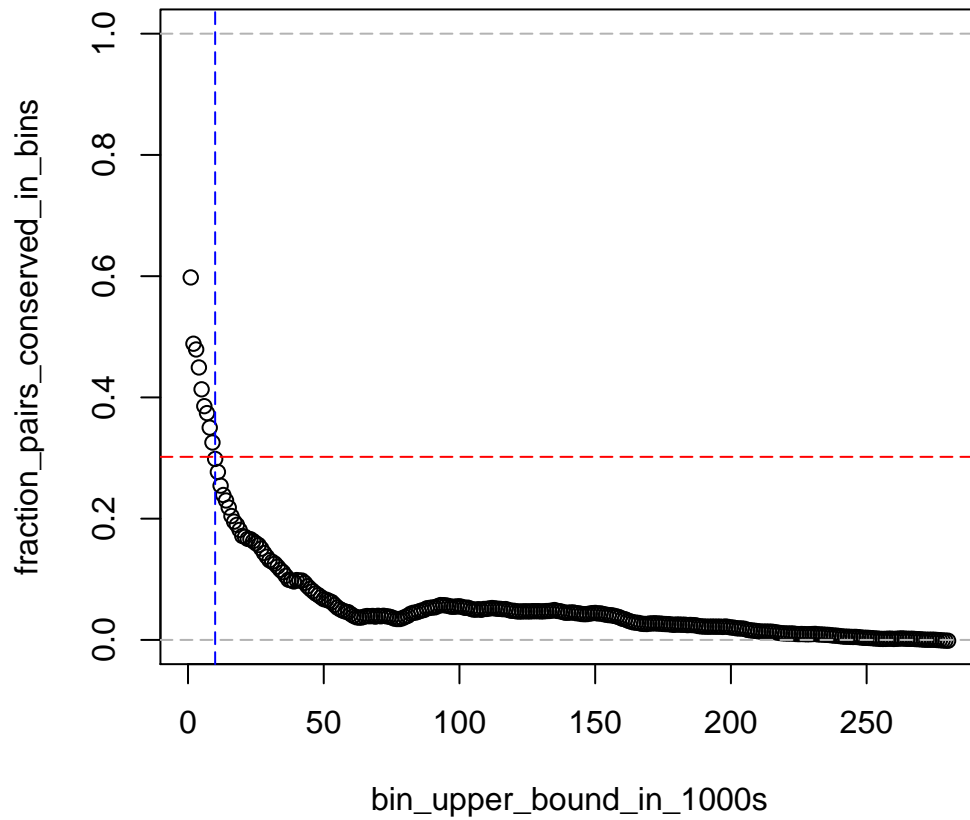

**Bin\_conservation\_minus\_bg\_Br0604L\_vs\_FR483**  
**PD-0.454355**

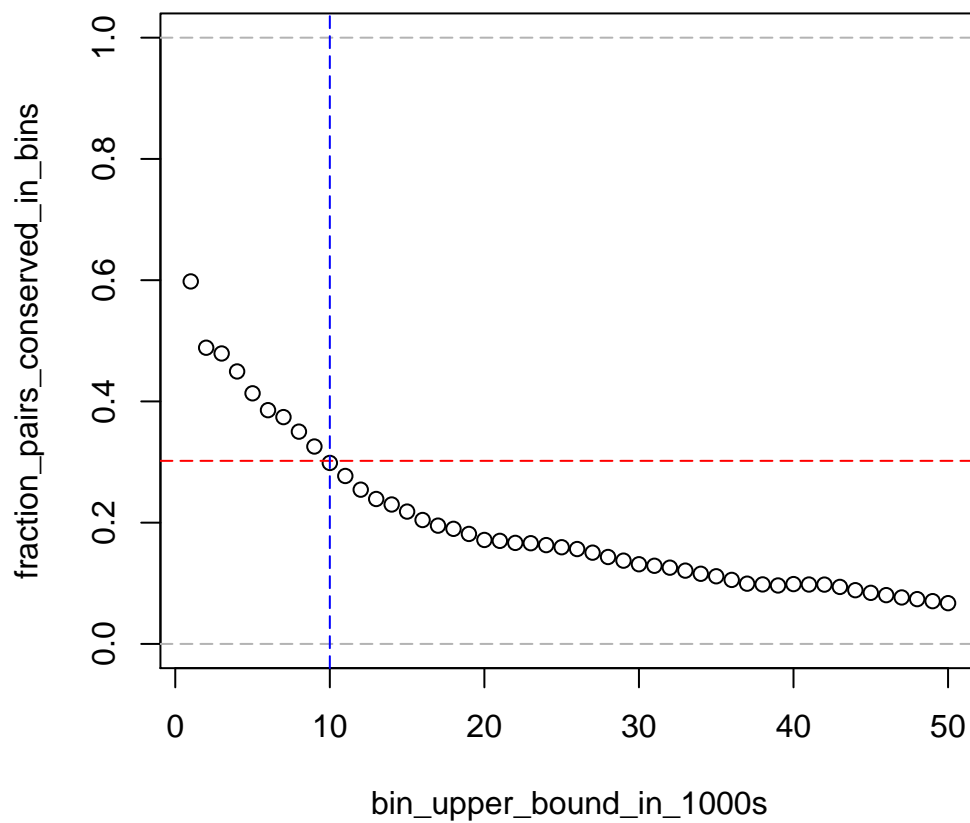

Supplement: s1 [file s1]

**Bin\_conservation\_minus\_bg\_CVG-1\_vs\_IL-3A**  
**PD-0.640932**

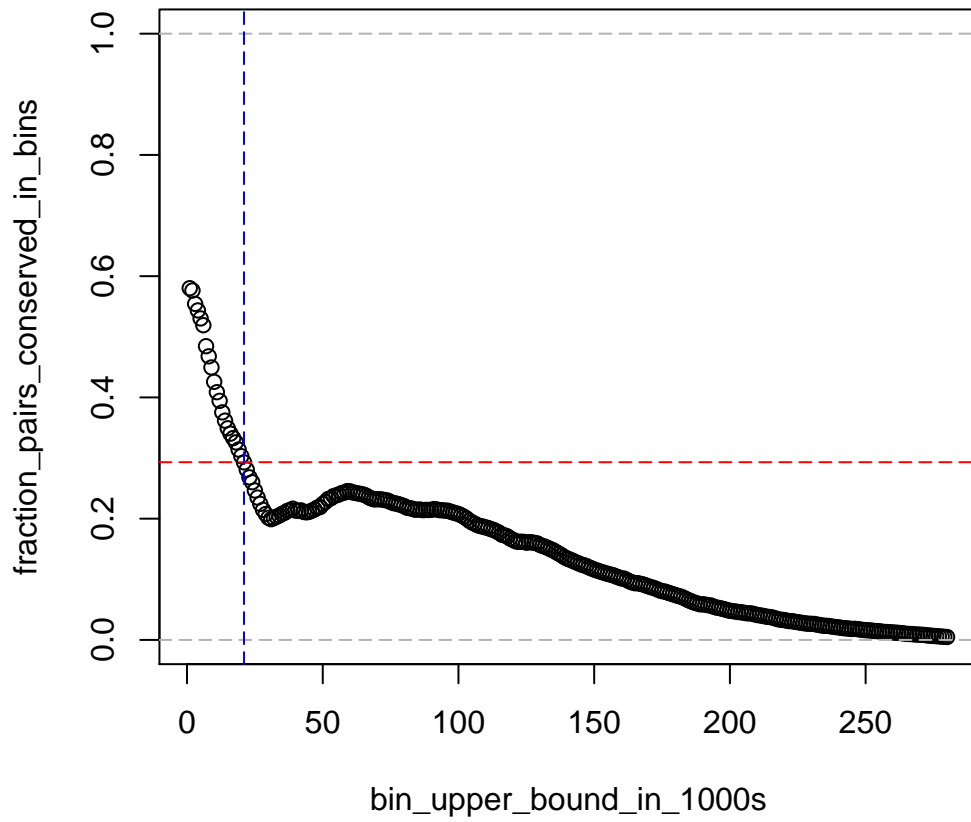

**Bin\_conservation\_minus\_bg\_CVG-1\_vs\_IL-3A**  
**PD-0.640932**

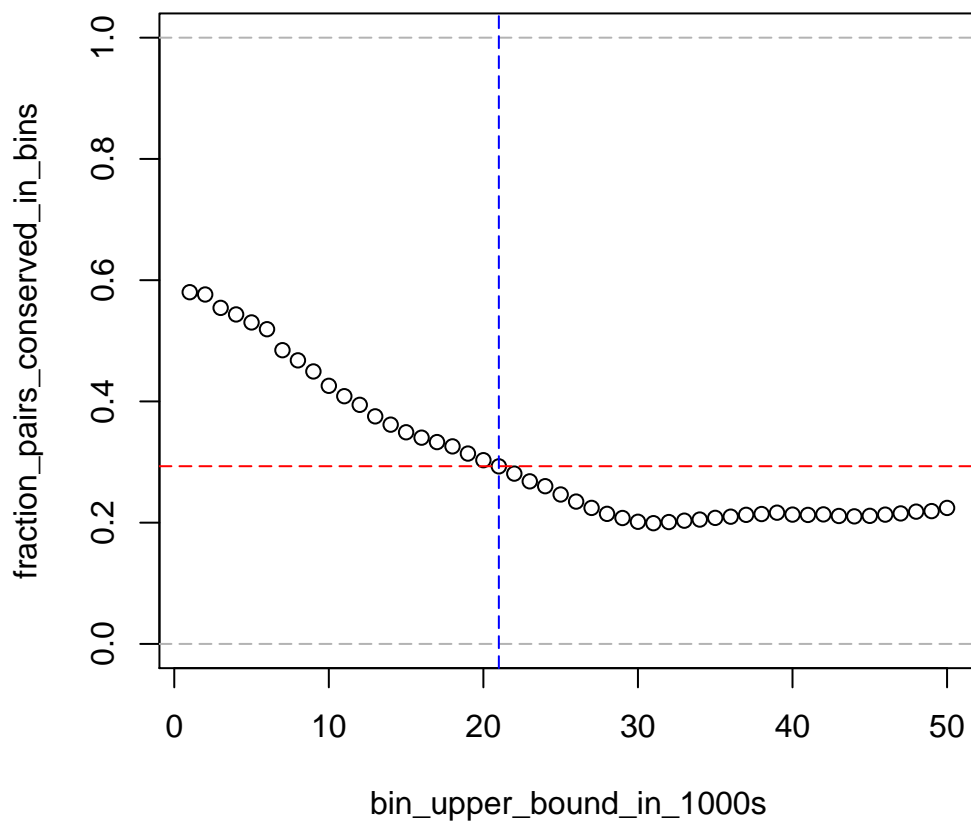

Supplement: s1 [file s1]

**Bin\_conservation\_minus\_bg\_NE-JV-3\_vs\_OR0704.2.2**  
**PD-0.459974**

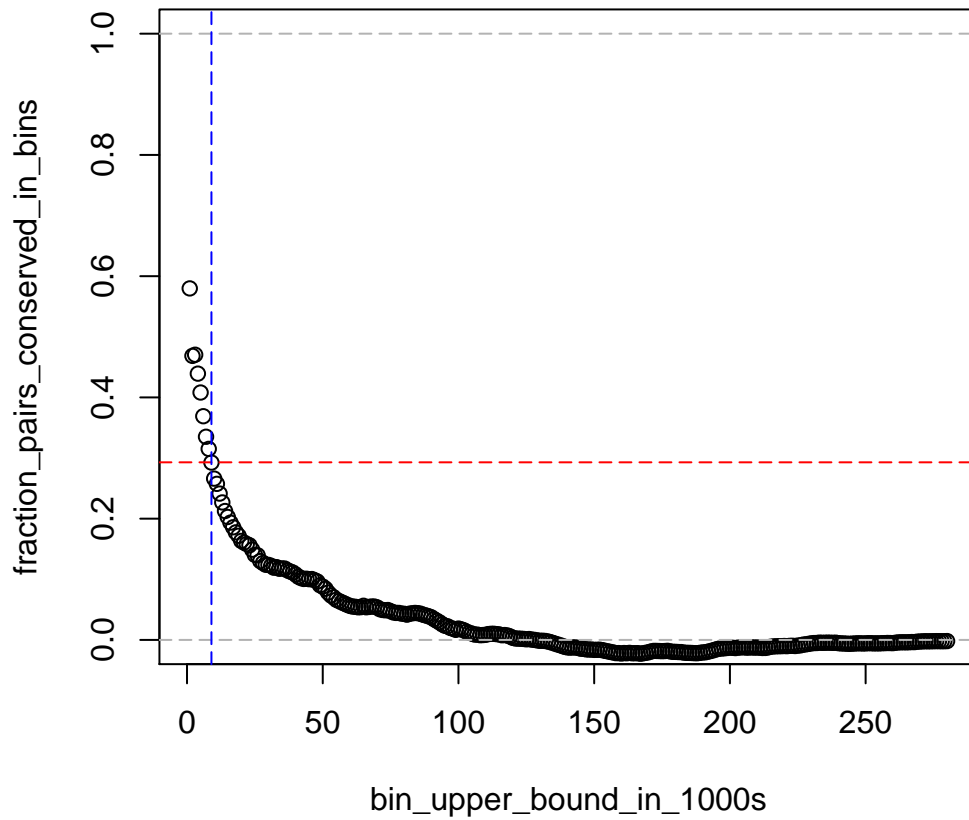

**Bin\_conservation\_minus\_bg\_NE-JV-3\_vs\_OR0704.2.2**  
**PD-0.459974**

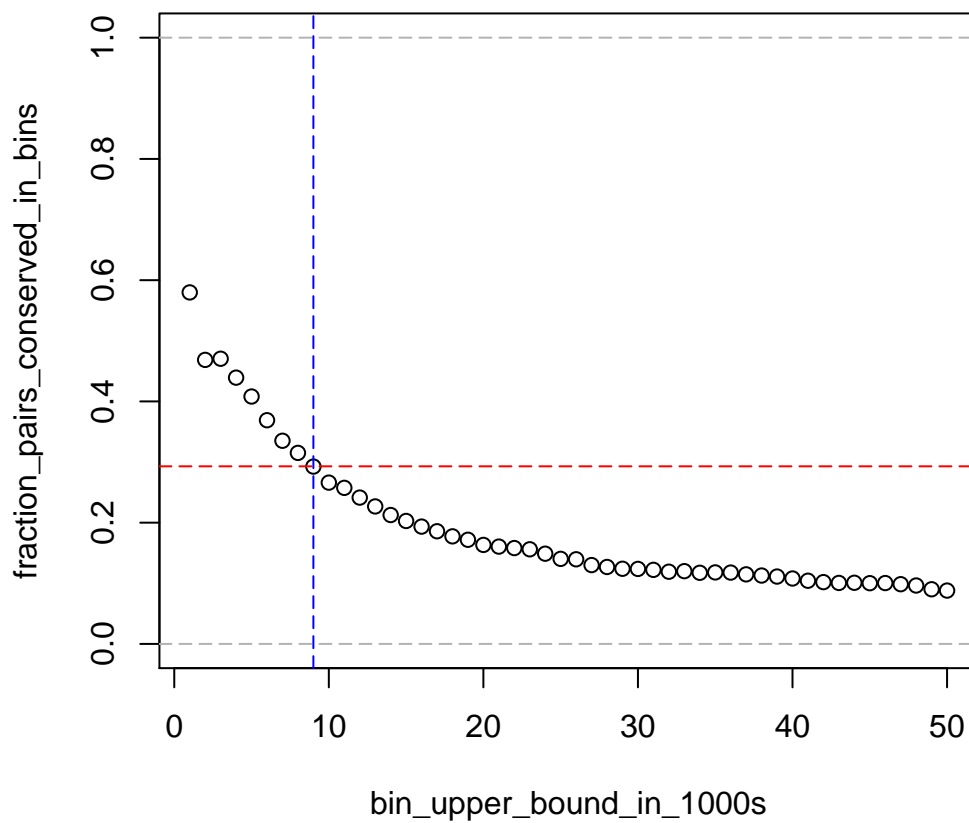

Supplement: s1 [file s1]

**Bin\_conservation\_minus\_bg\_AR158\_vs\_NY2A**  
**PD-0.054046**

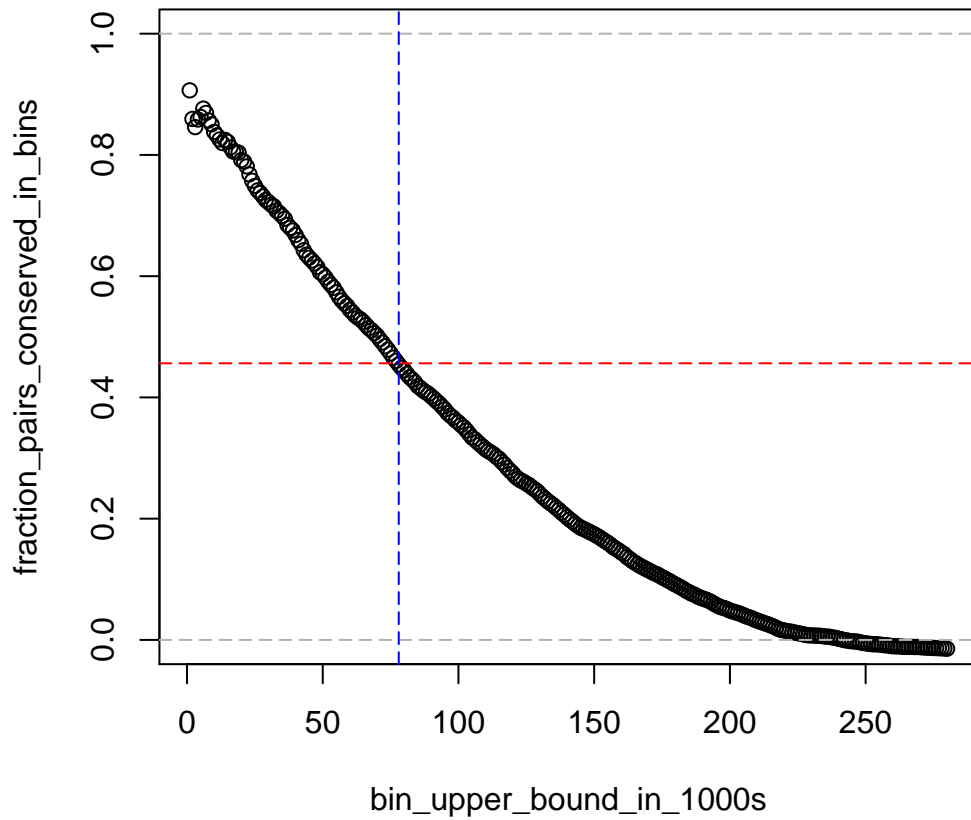

**Bin\_conservation\_minus\_bg\_AR158\_vs\_NY2A**  
**PD-0.054046**

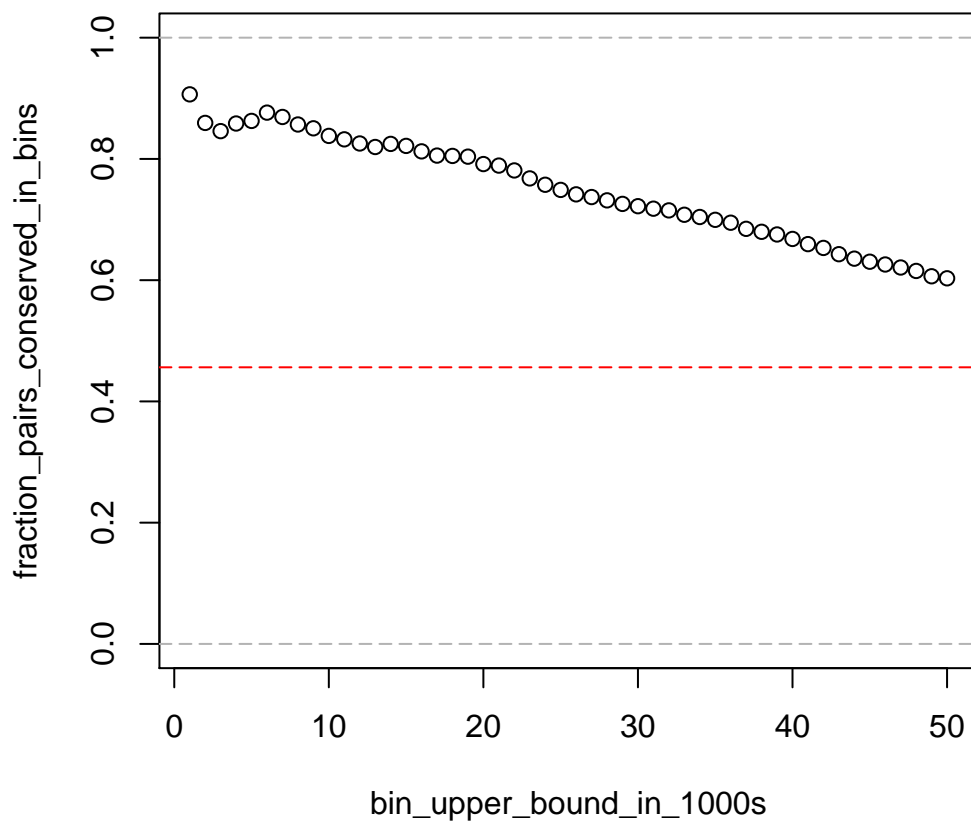

Supplement: s1 [file s1]

**Bin\_conservation\_minus\_bg\_NTS-1\_vs\_TN603.4.2**  
**PD-0.056729**

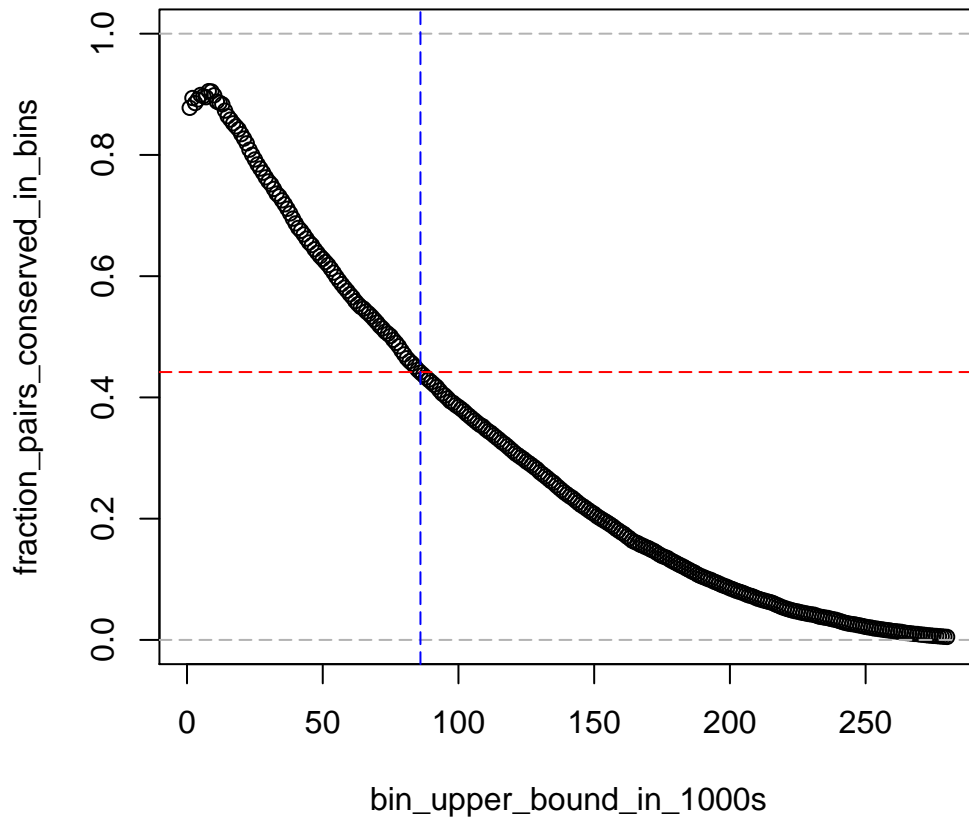

**Bin\_conservation\_minus\_bg\_NTS-1\_vs\_TN603.4.2**  
**PD-0.056729**

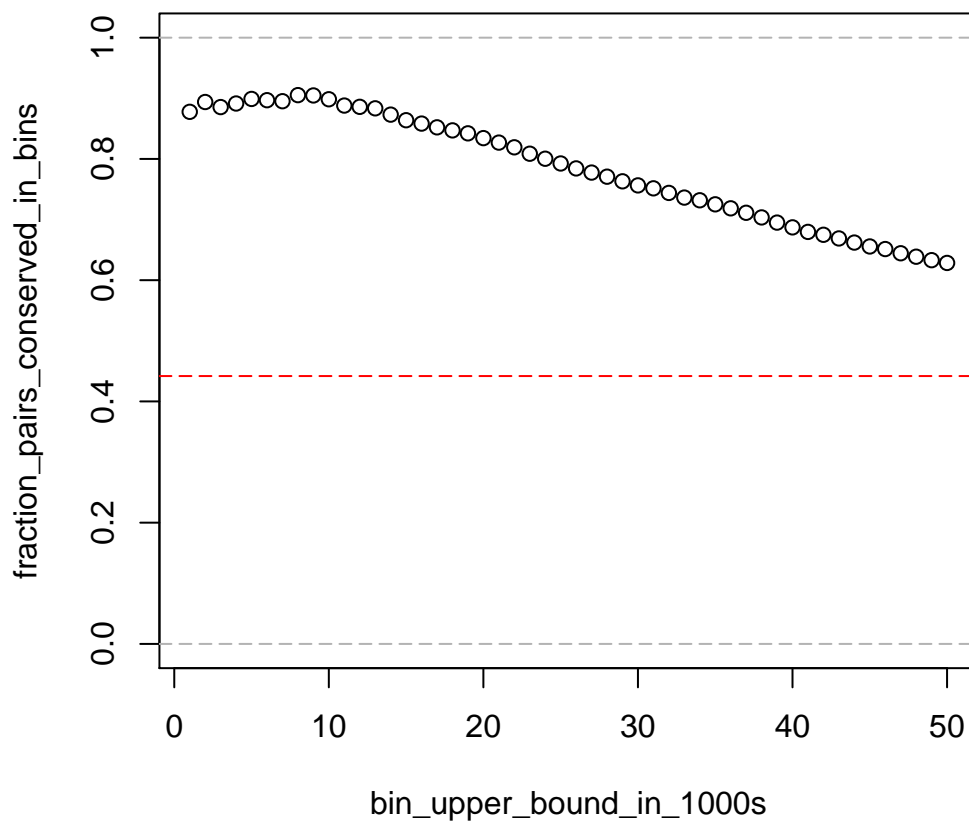

Supplement: s1 [file s1]

**Bin\_conservation\_minus\_bg\_AN69C\_vs\_MT325**  
**PD-0.635141**

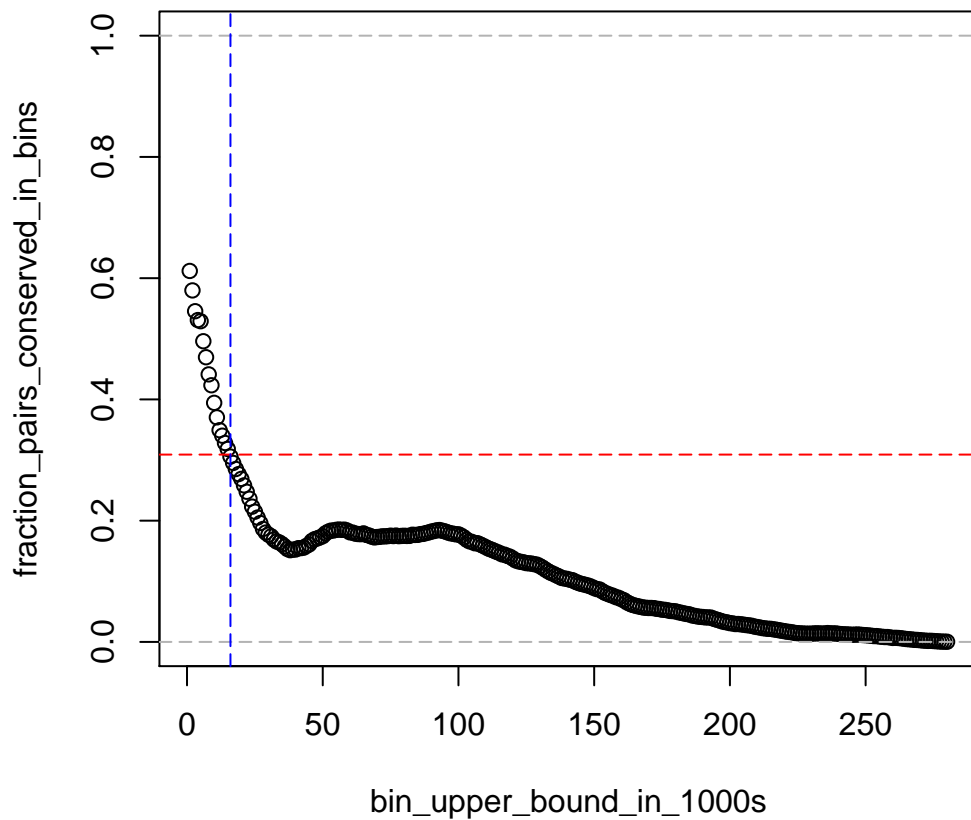

**Bin\_conservation\_minus\_bg\_AN69C\_vs\_MT325**  
**PD-0.635141**

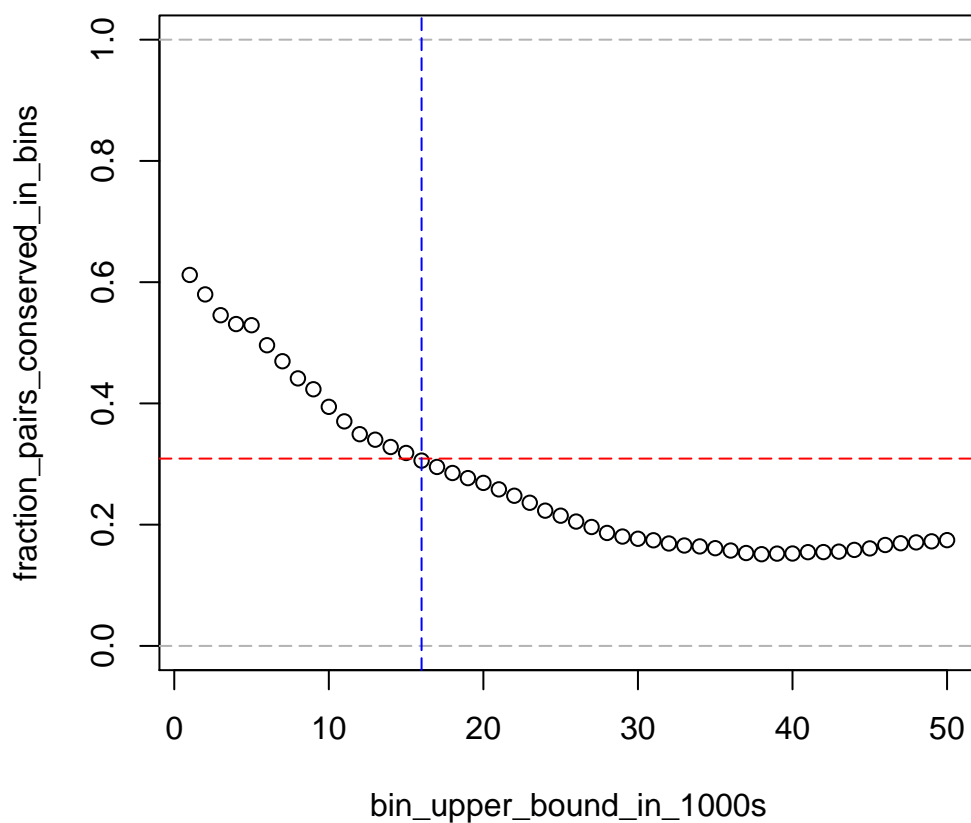

Supplement: s1 [file s1]

**Bin\_conservation\_minus\_bg\_CvsA1\_vs\_MN0810.1**  
**PD-0.692364**

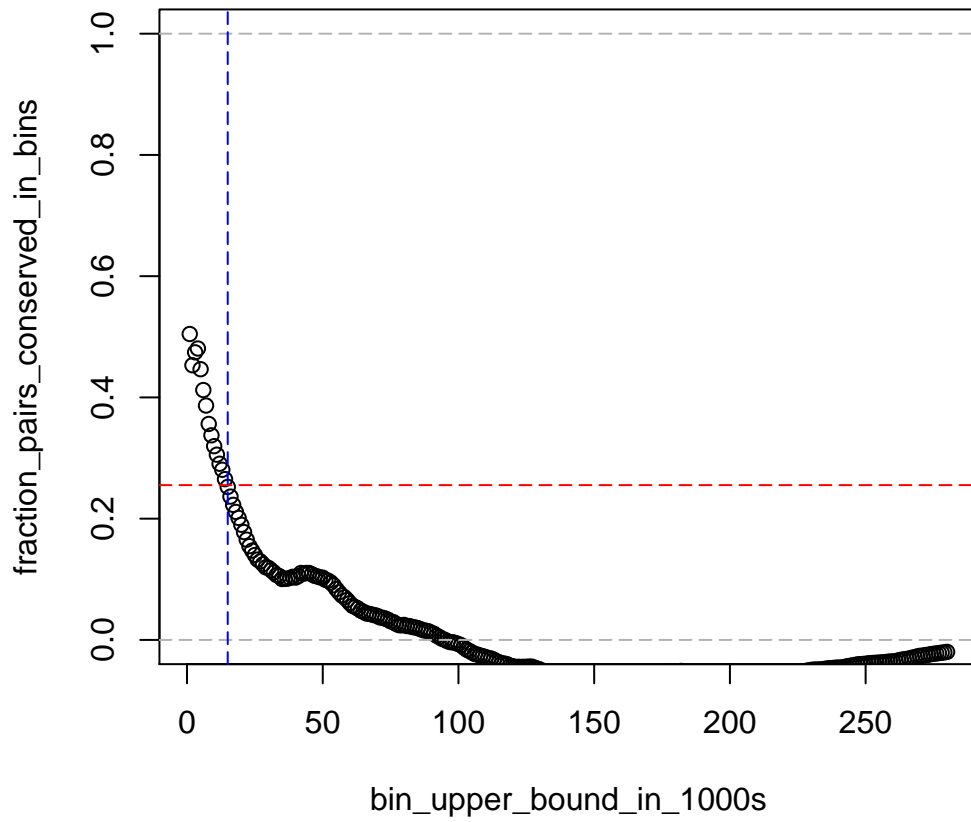

**Bin\_conservation\_minus\_bg\_CvsA1\_vs\_MN0810.1**  
**PD-0.692364**

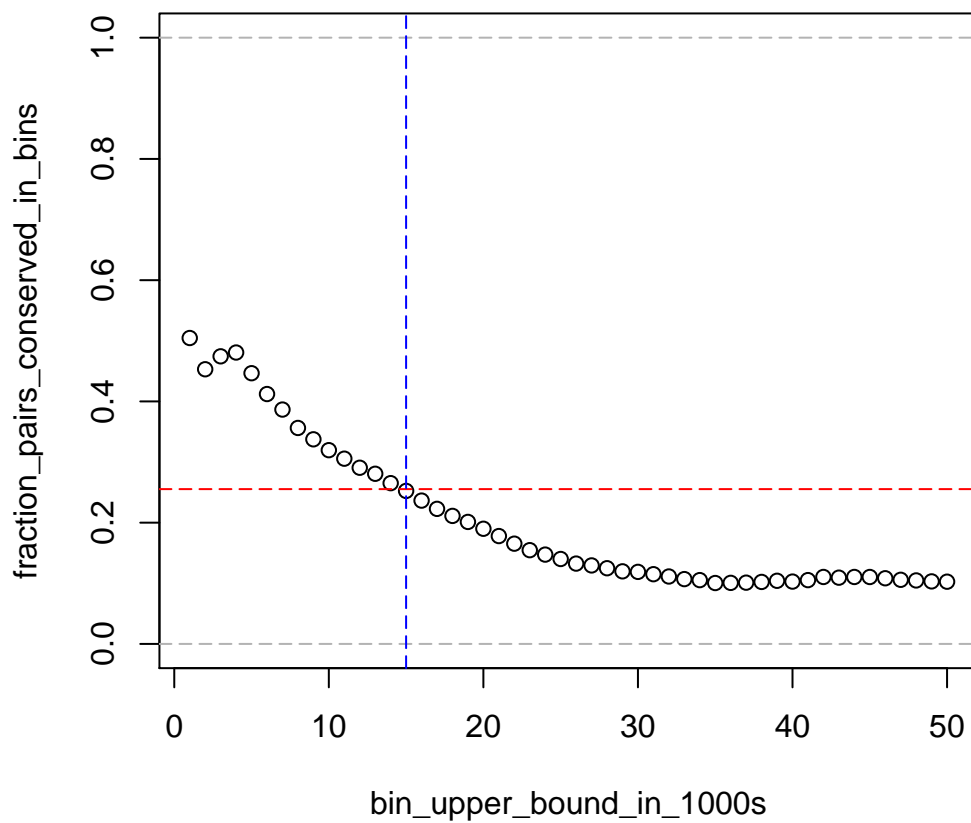

Supplement: s1 [file s1]

**Bin\_conservation\_minus\_bg\_GM0701.1\_vs\_MO0605SPt**  
**PD-0.065334**

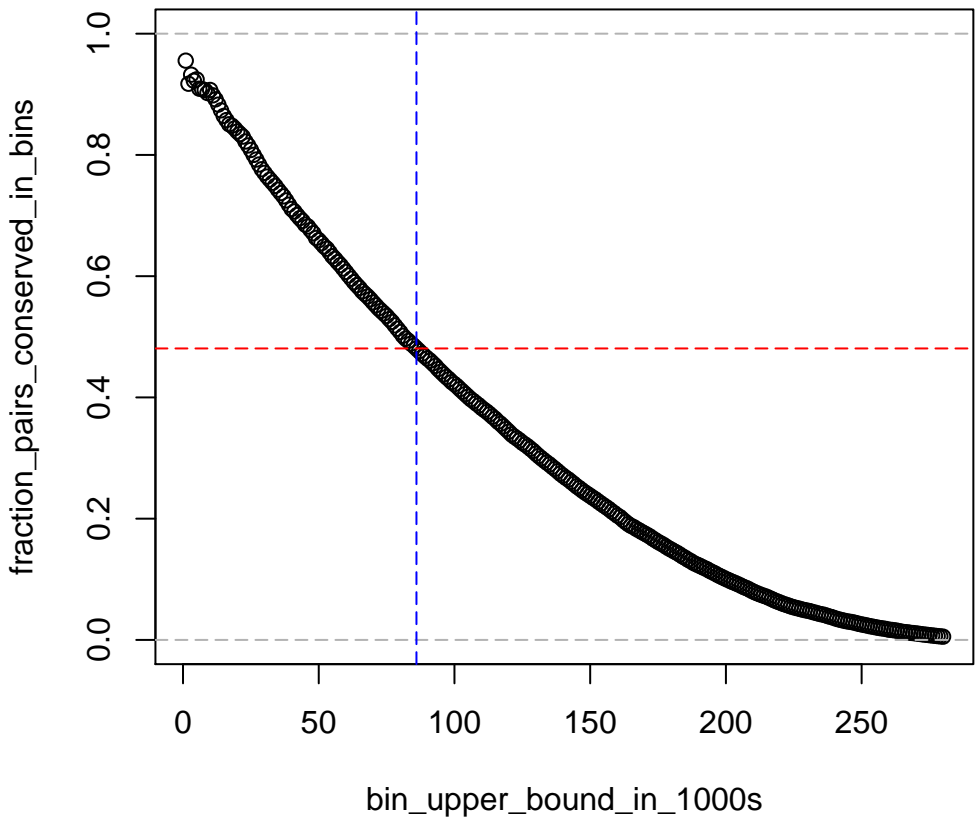

**Bin\_conservation\_minus\_bg\_GM0701.1\_vs\_MO0605SPt**  
**PD-0.065334**

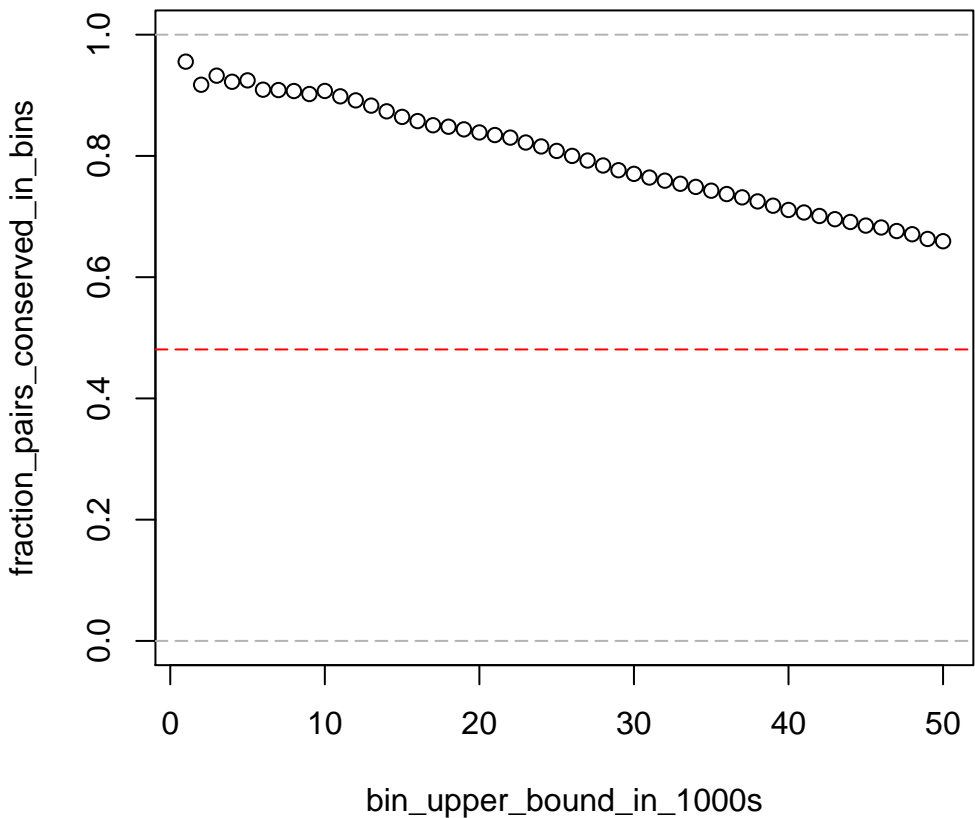

Supplement: s1 [file s1]

**Bin\_conservation\_minus\_bg\_GM0701.1\_vs\_NY2A**  
**PD-0.699622**

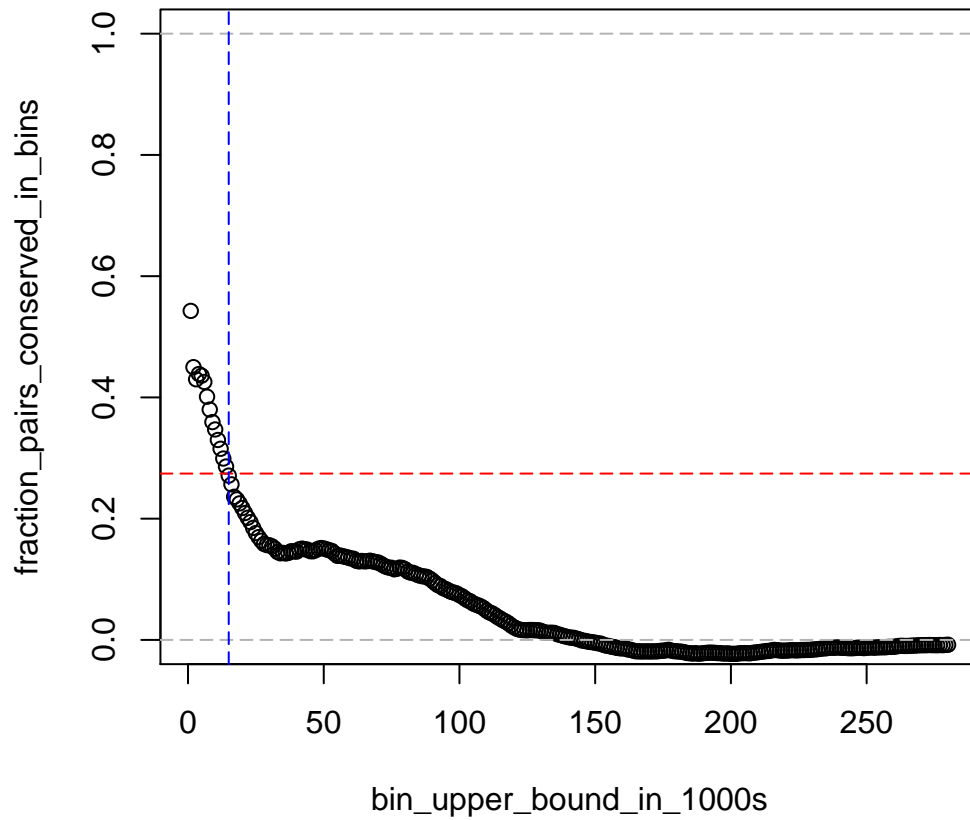

**Bin\_conservation\_minus\_bg\_GM0701.1\_vs\_NY2A**  
**PD-0.699622**

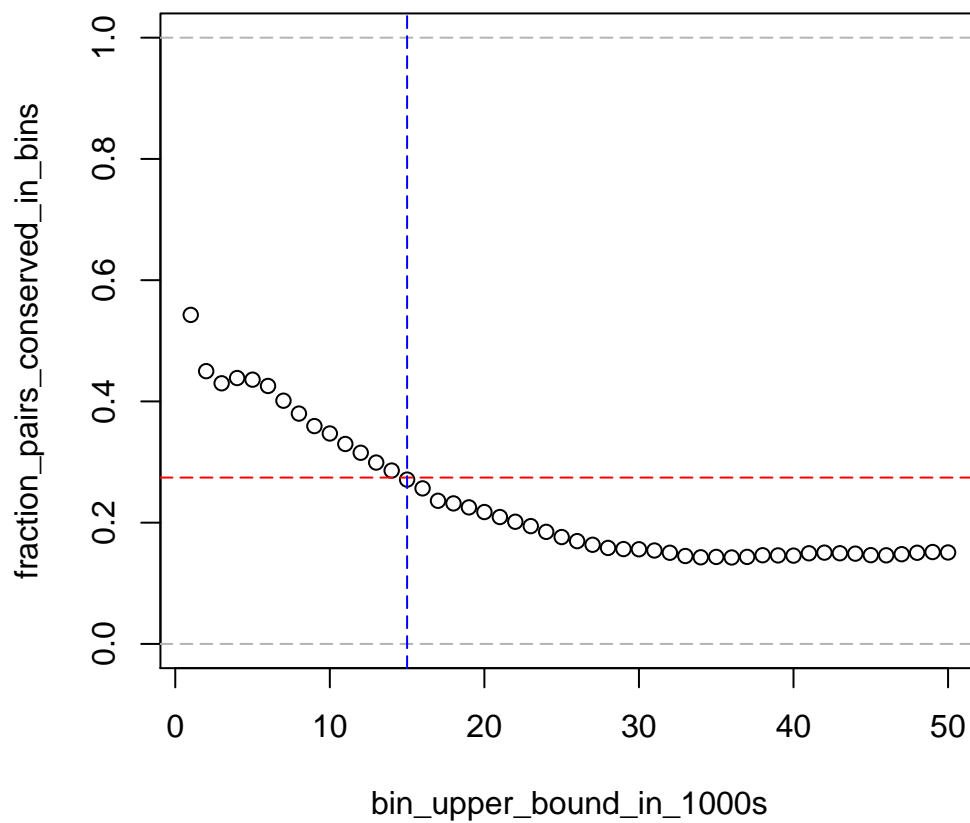

Supplement: s1 [file s1]

**Bin\_conservation\_minus\_bg\_CVM-1\_vs\_GM0701.1**  
**PD-0.449095**

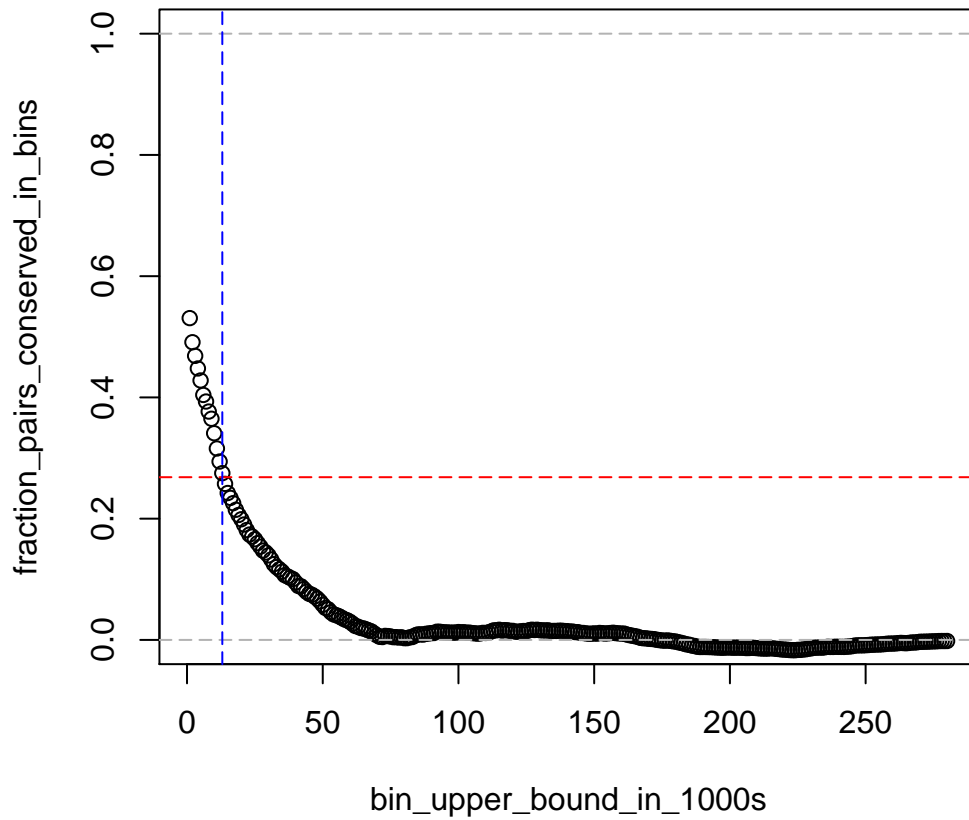

**Bin\_conservation\_minus\_bg\_CVM-1\_vs\_GM0701.1**  
**PD-0.449095**

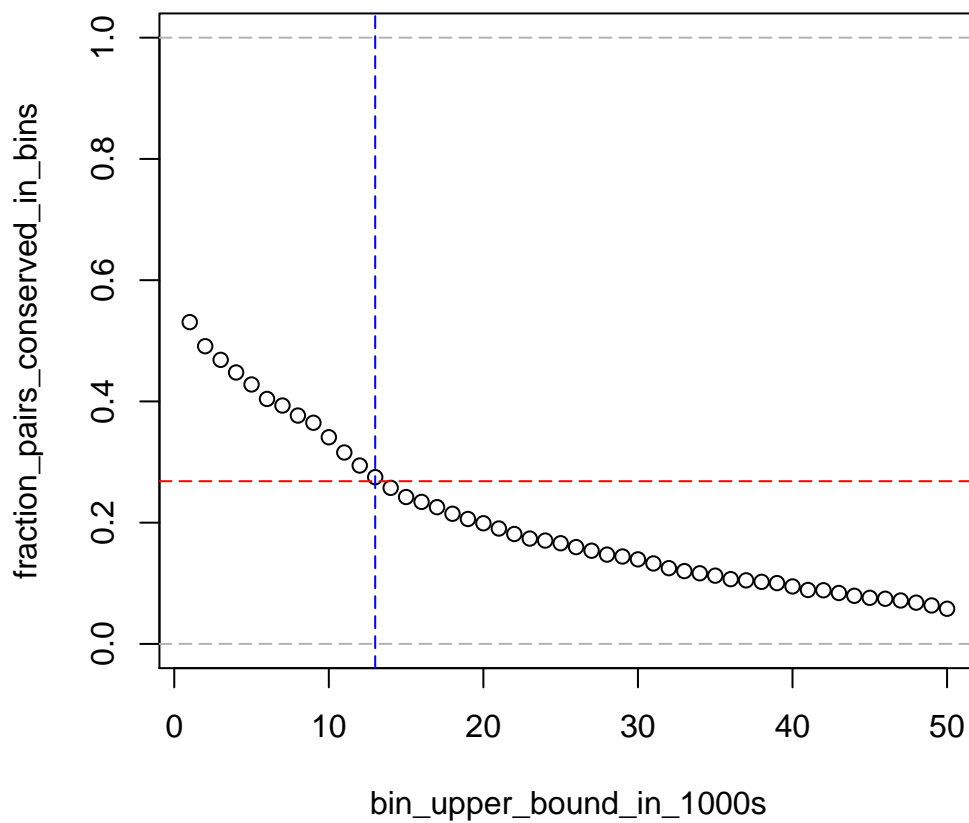

Supplement: s1 [file s1]

**Bin\_conservation\_minus\_bg\_IL-3A\_vs\_NE-JV-4**  
**PD-0.00171**

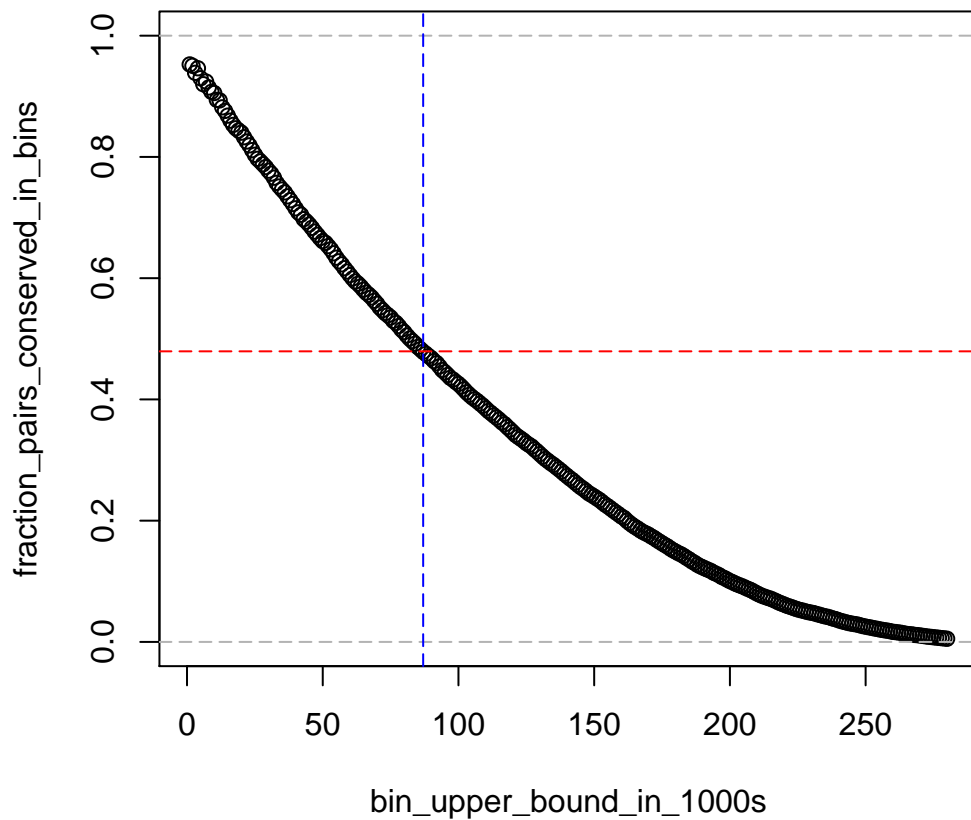

**Bin\_conservation\_minus\_bg\_IL-3A\_vs\_NE-JV-4**  
**PD-0.00171**

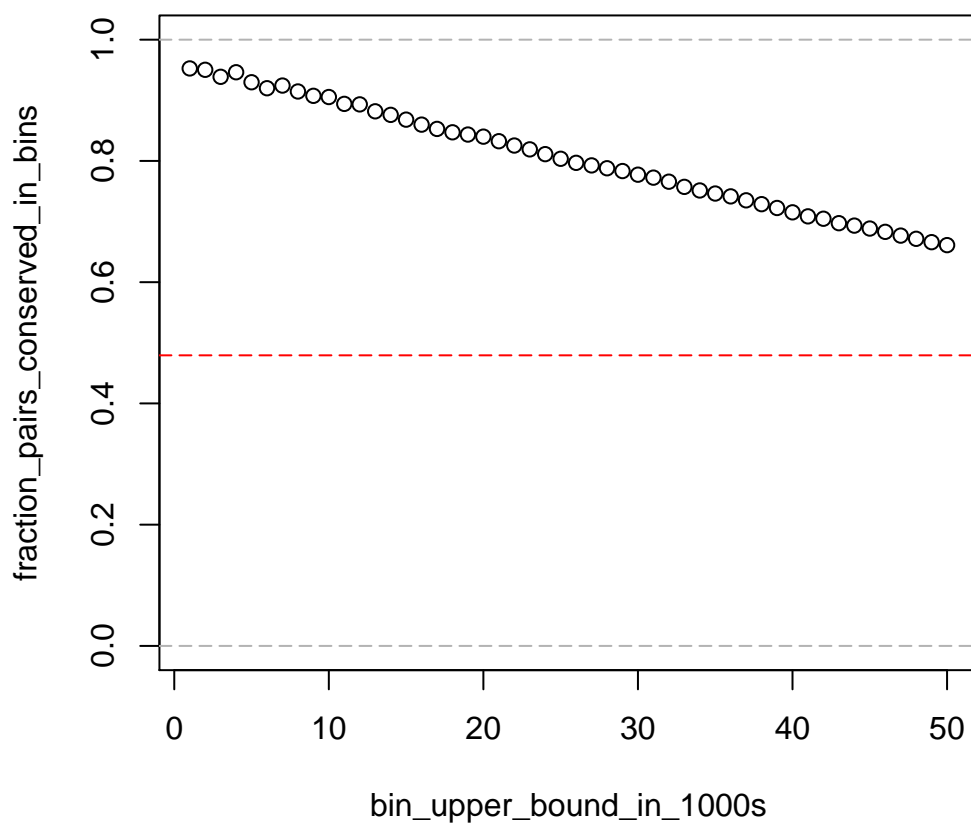

Supplement: s1 [file s1]

**Bin\_conservation\_minus\_bg\_Can0610SP\_vs\_PBCV1**  
**PD-0.677001**

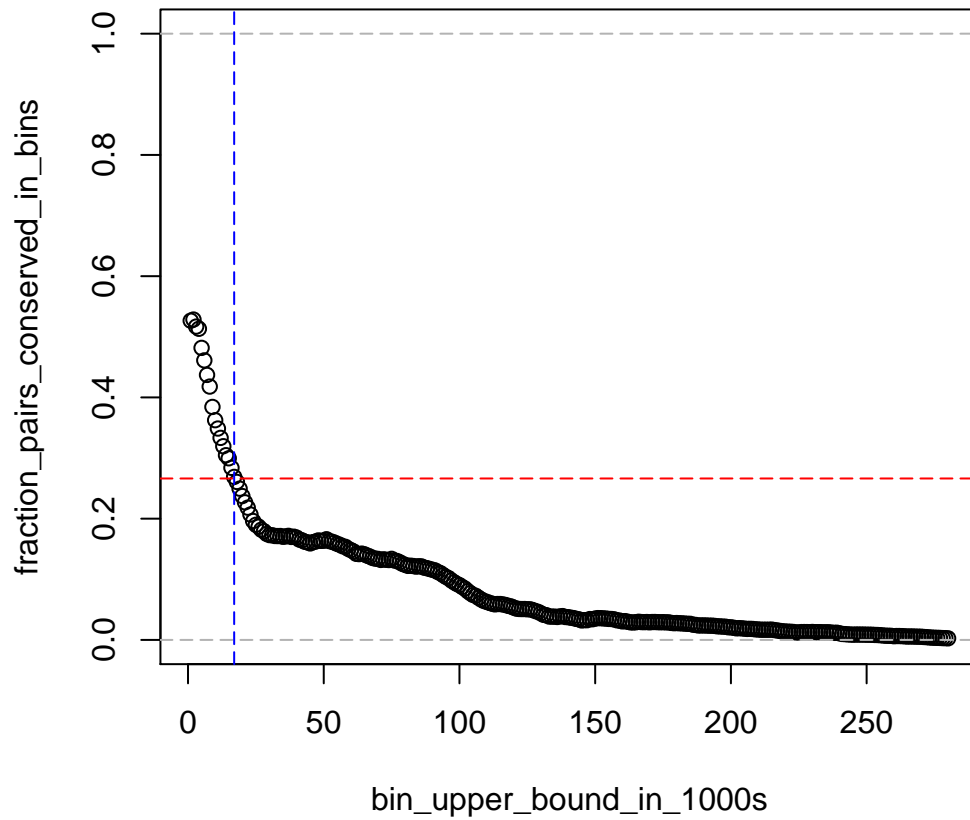

**Bin\_conservation\_minus\_bg\_Can0610SP\_vs\_PBCV1**  
**PD-0.677001**

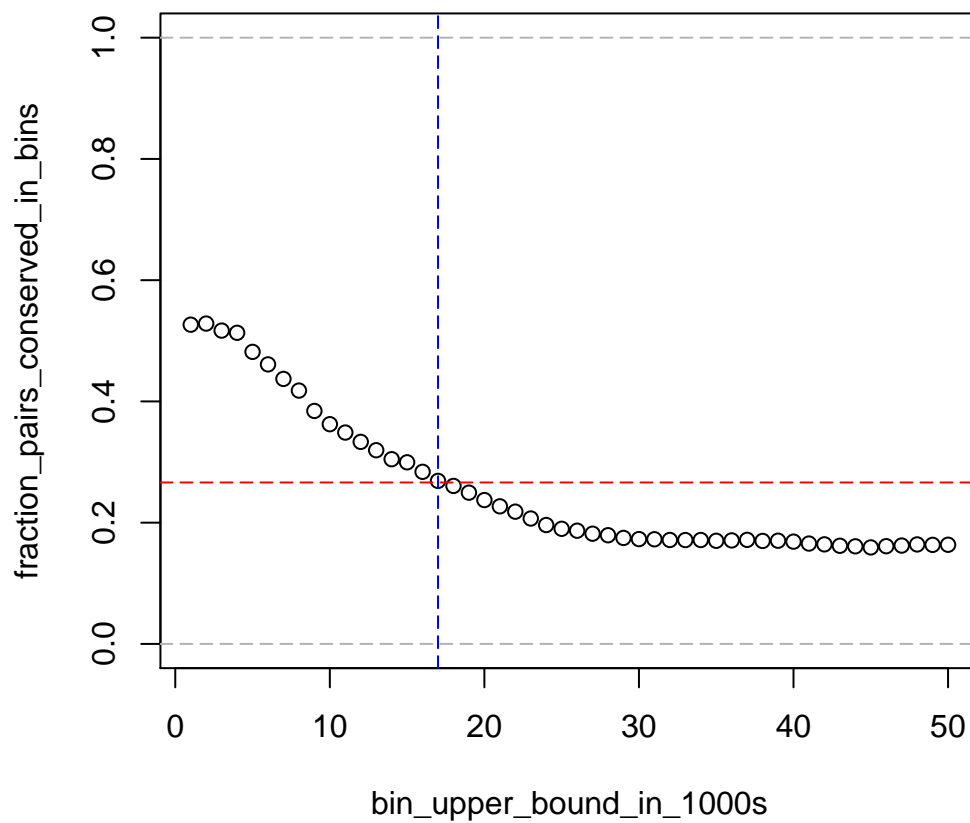

Supplement: s1 [file s1]

**Bin\_conservation\_minus\_bg\_AR158\_vs\_CVR-1**  
**PD-0.660928**

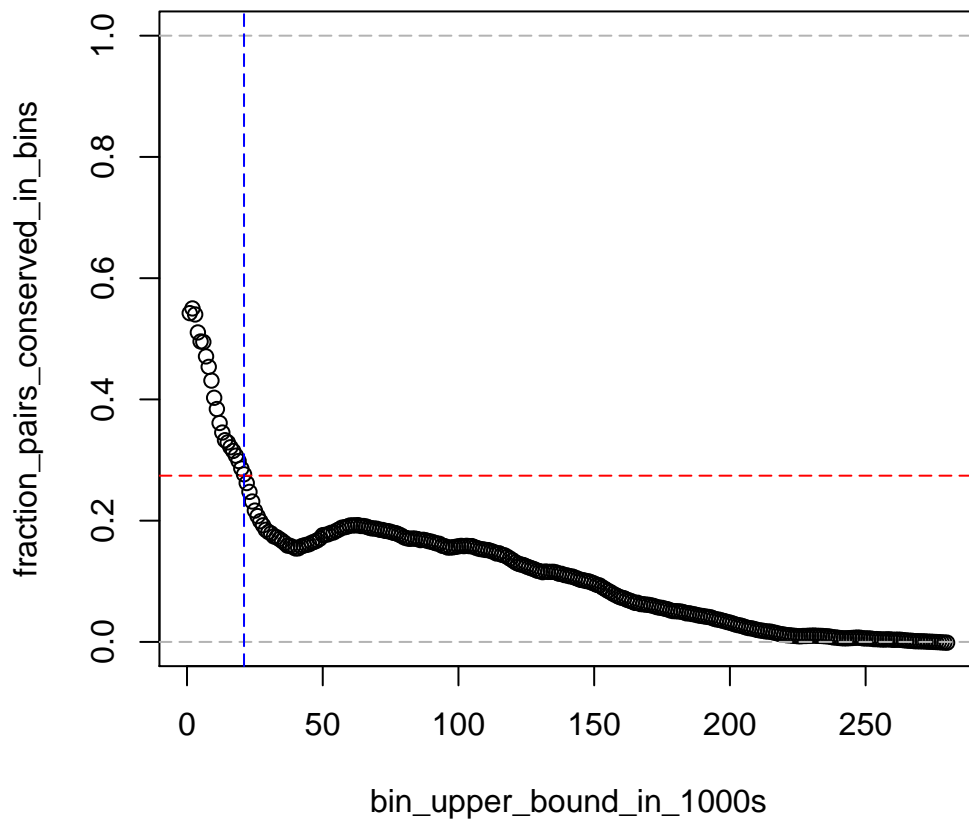

**Bin\_conservation\_minus\_bg\_AR158\_vs\_CVR-1**  
**PD-0.660928**

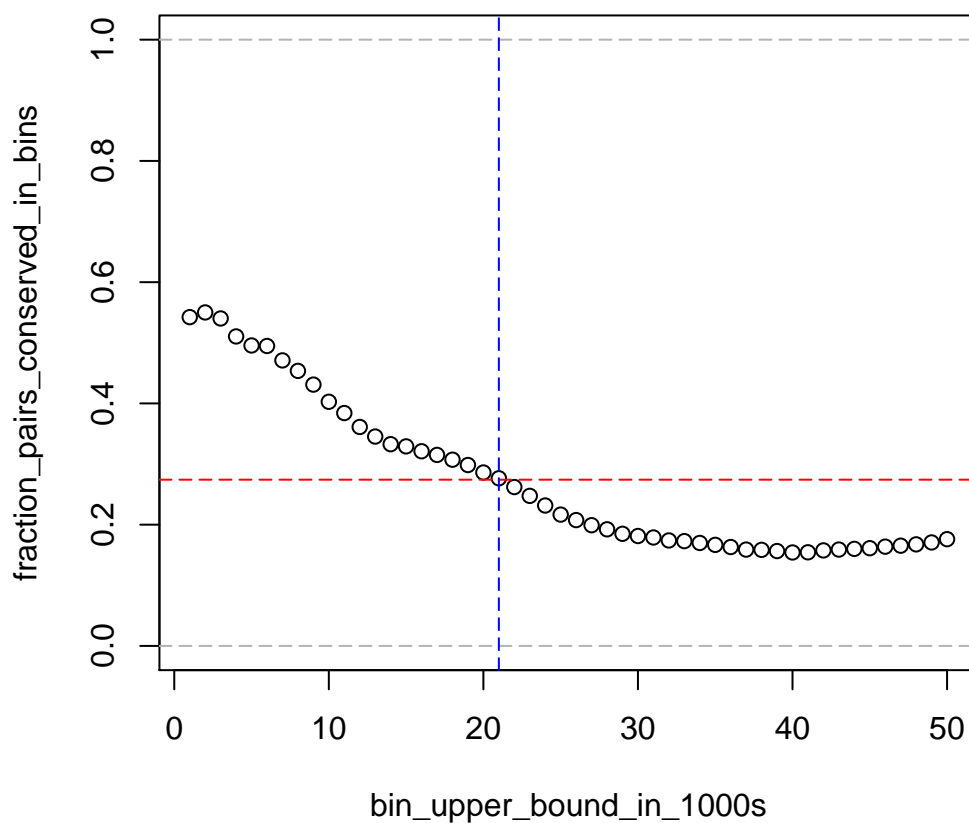

Supplement: s1 [file s1]

**Bin\_conservation\_minus\_bg\_MN0810.1\_vs\_NE-JV-1**  
**PD-0.491624**

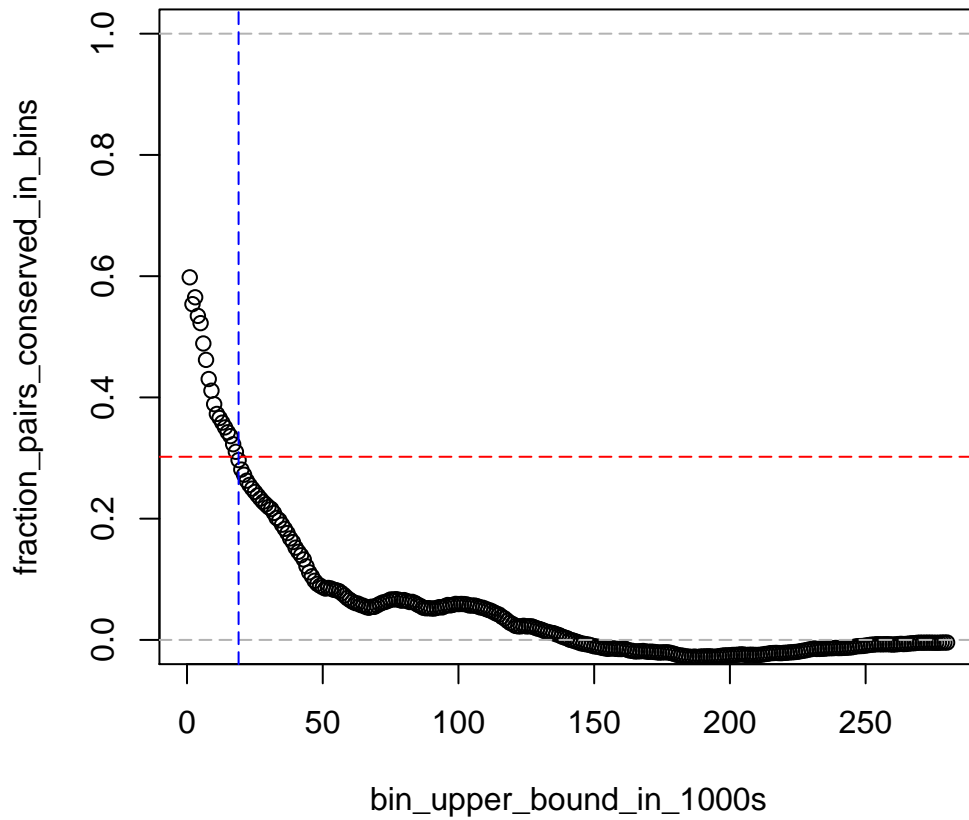

**Bin\_conservation\_minus\_bg\_MN0810.1\_vs\_NE-JV-1**  
**PD-0.491624**

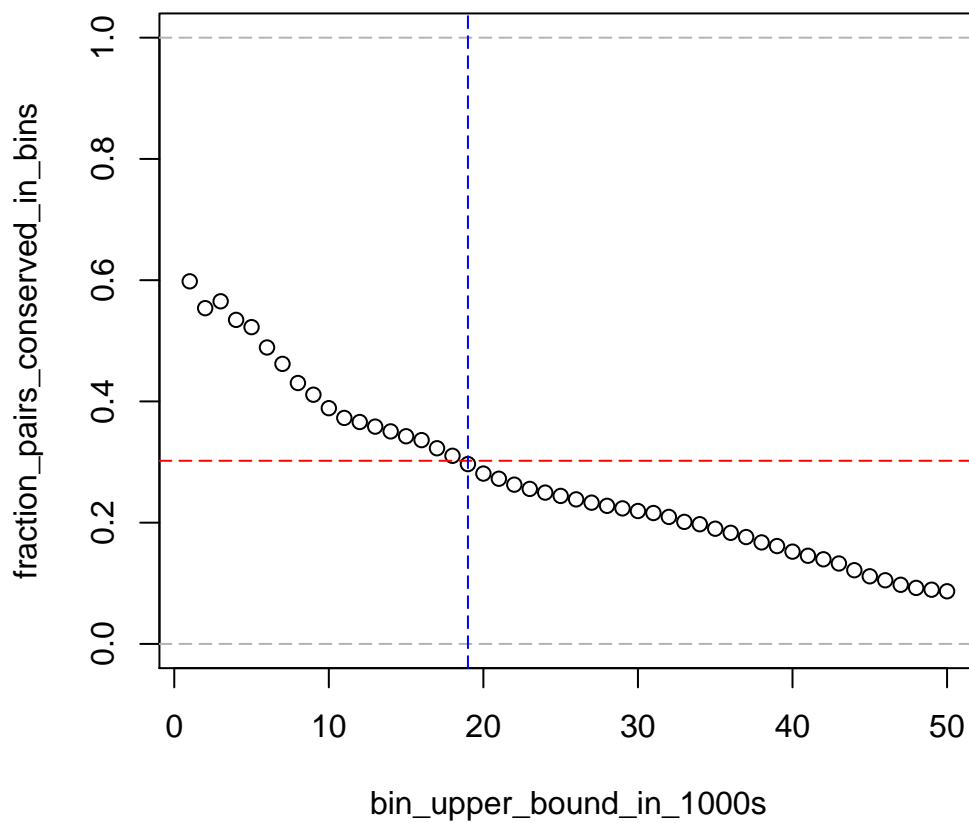

Supplement: s1 [file s1]

**Bin\_conservation\_minus\_bg\_CZ-2\_vs\_WI0606**  
**PD-0.469046**

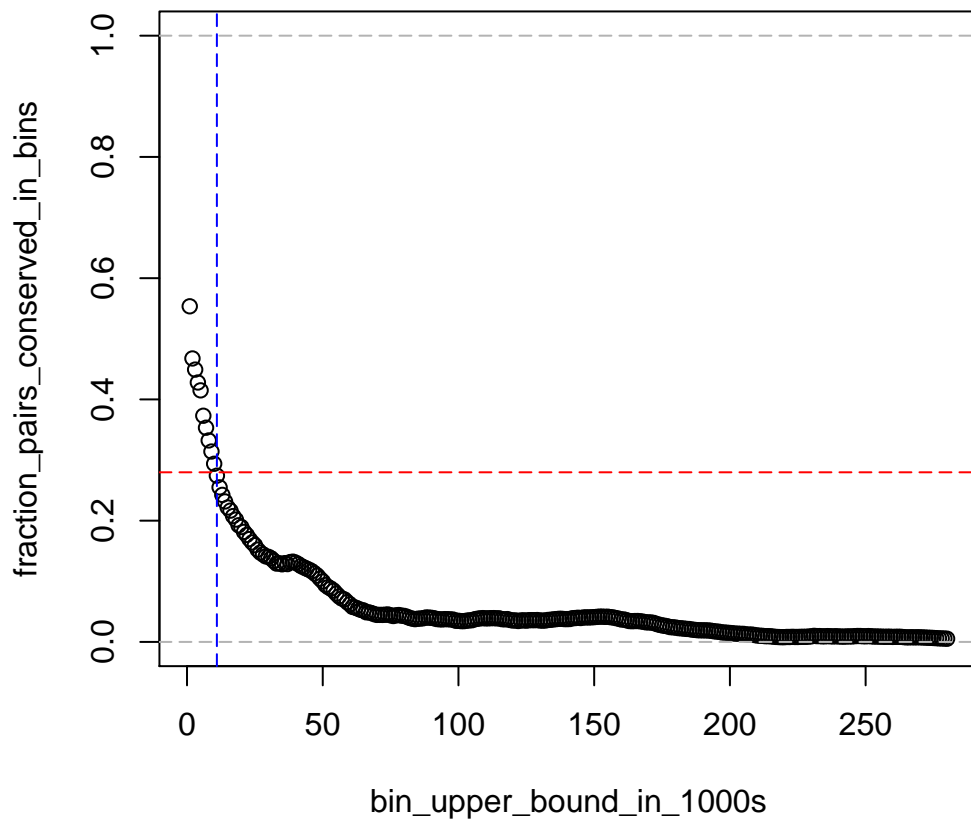

**Bin\_conservation\_minus\_bg\_CZ-2\_vs\_WI0606**  
**PD-0.469046**

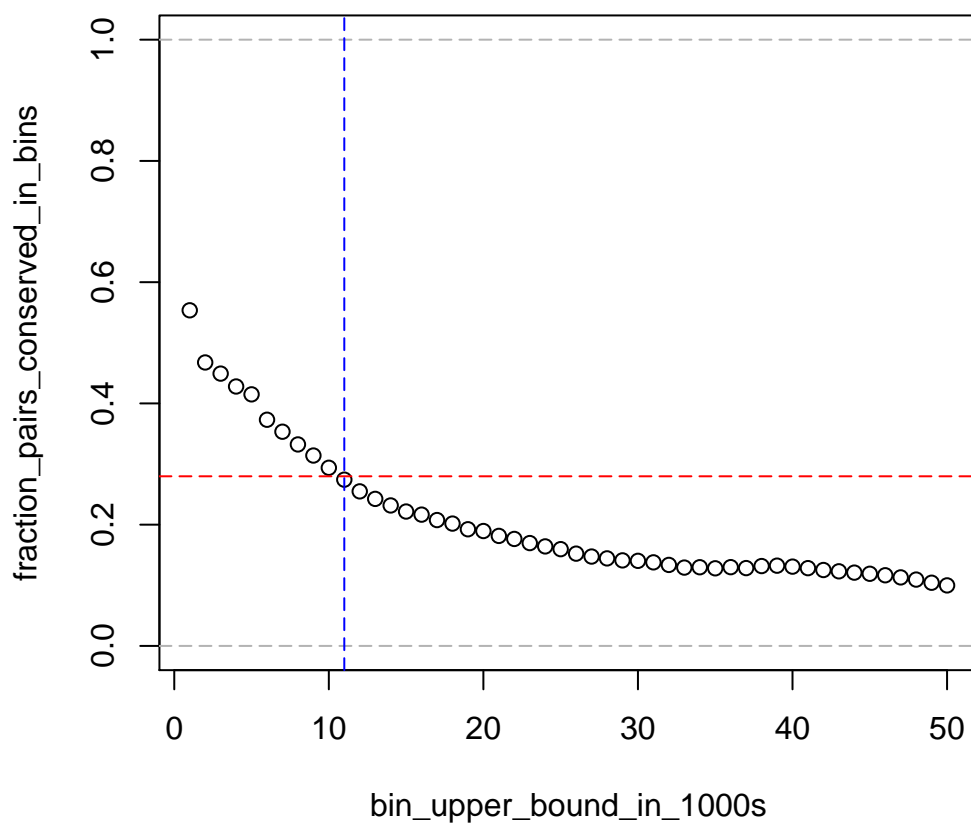

Supplement: s1 [file s1]

**Bin\_conservation\_minus\_bg\_NY-2B\_vs\_OR0704.2.2**  
**PD-0.662653**

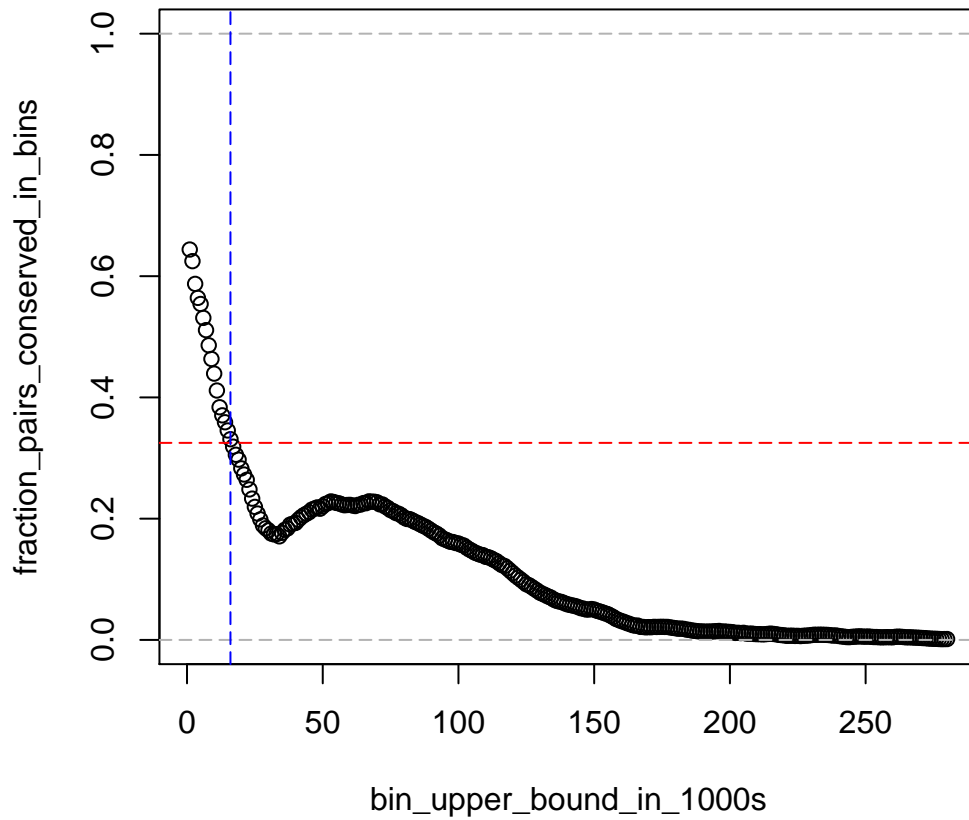

**Bin\_conservation\_minus\_bg\_NY-2B\_vs\_OR0704.2.2**  
**PD-0.662653**

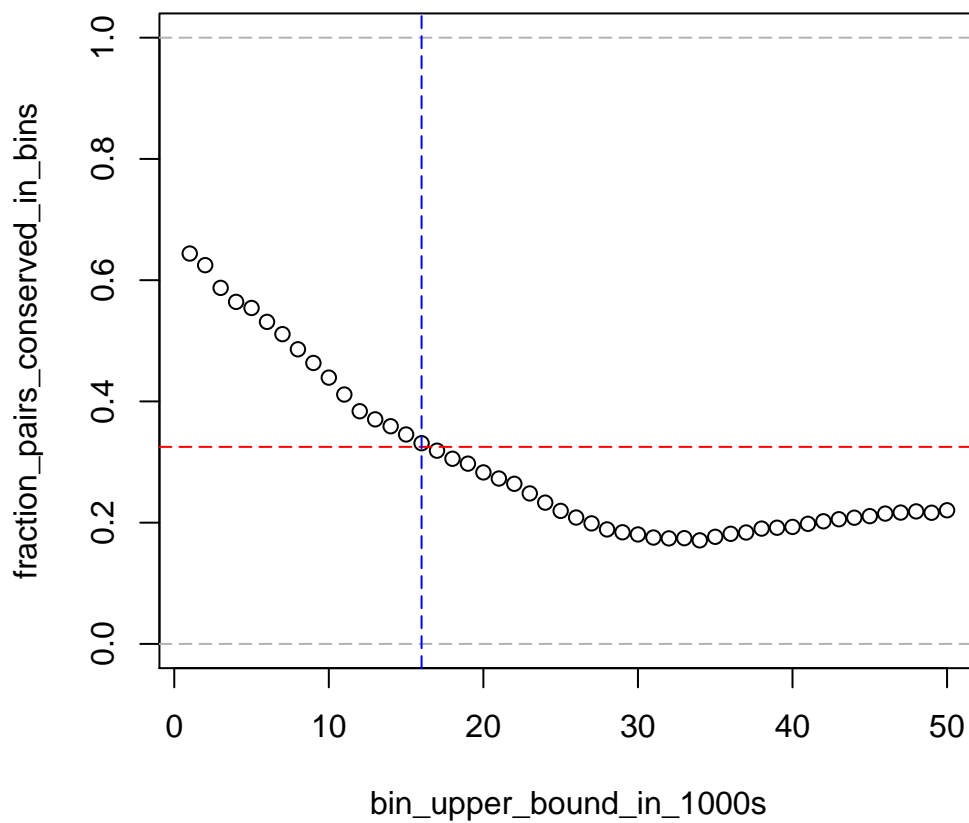

Supplement: s1 [file s1]

**Bin\_conservation\_minus\_bg\_FR483\_vs\_OR0704.3**  
**PD-0.465339**

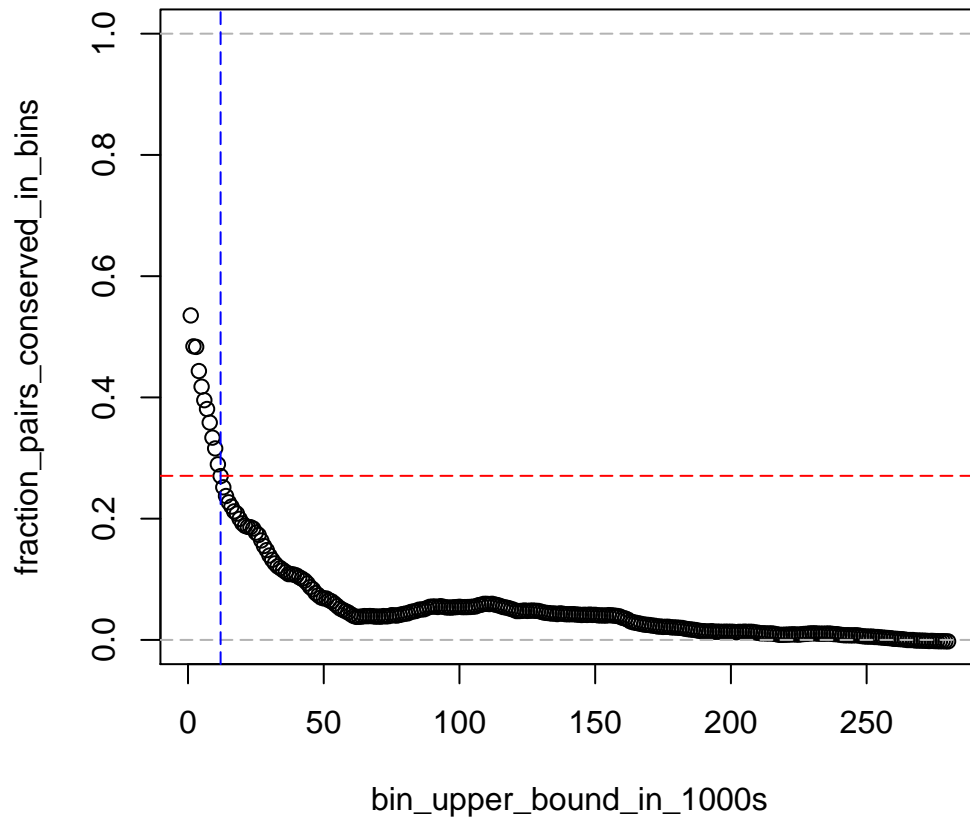

**Bin\_conservation\_minus\_bg\_FR483\_vs\_OR0704.3**  
**PD-0.465339**

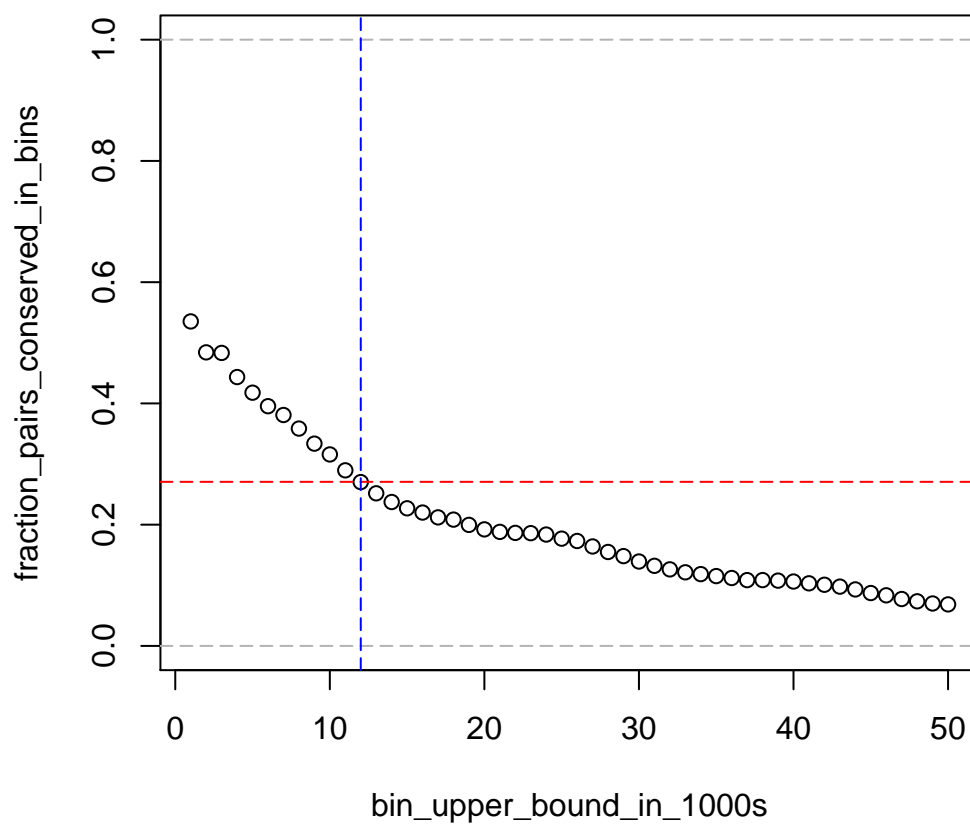

Supplement: s1 [file s1]

**Bin\_conservation\_minus\_bg\_ATCV1\_vs\_NE-JV-3**  
**PD-0.008984**

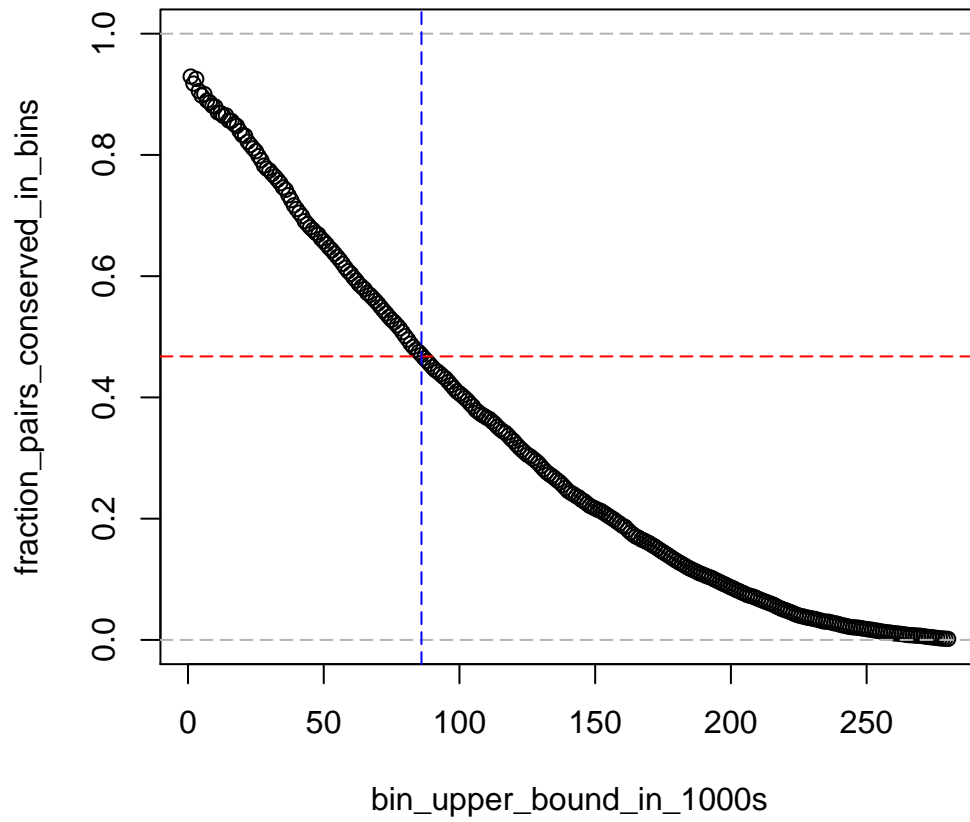

**Bin\_conservation\_minus\_bg\_ATCV1\_vs\_NE-JV-3**  
**PD-0.008984**

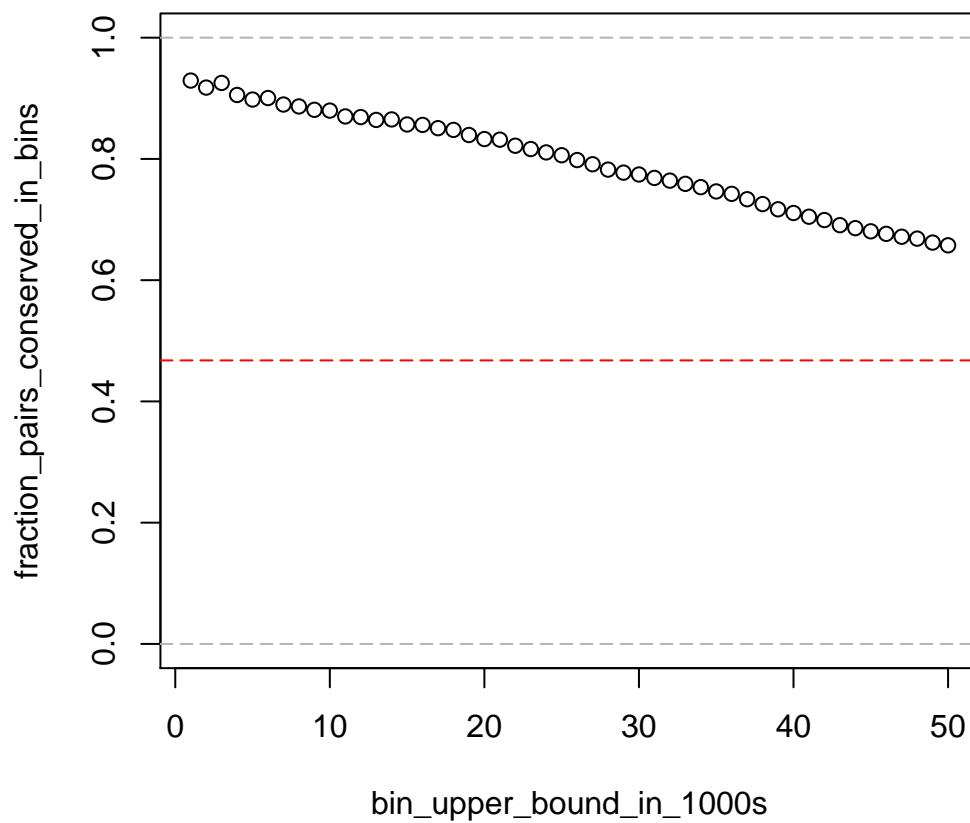

Supplement: s1 [file s1]

**Bin\_conservation\_minus\_bg\_MN0810.1\_vs\_NE-JV-2**  
**PD-0.110919**

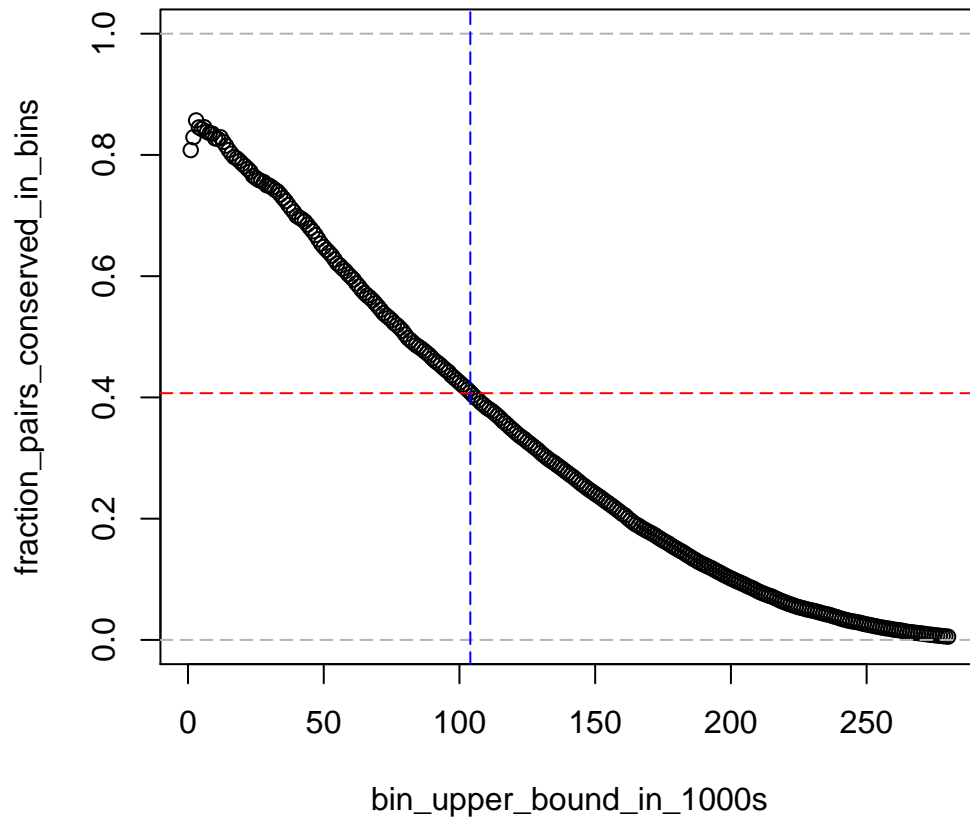

**Bin\_conservation\_minus\_bg\_MN0810.1\_vs\_NE-JV-2**  
**PD-0.110919**

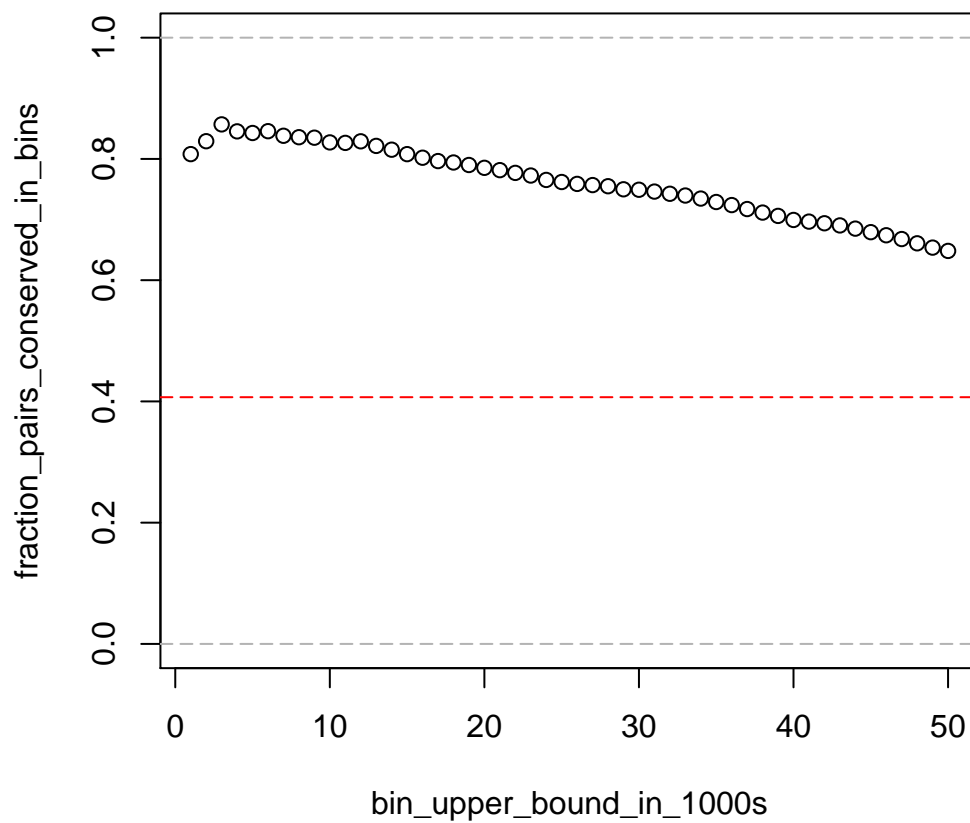

Supplement: s1 [file s1]

**Bin\_conservation\_minus\_bg\_CVG-1\_vs\_CVM-1**  
**PD-0.016862**

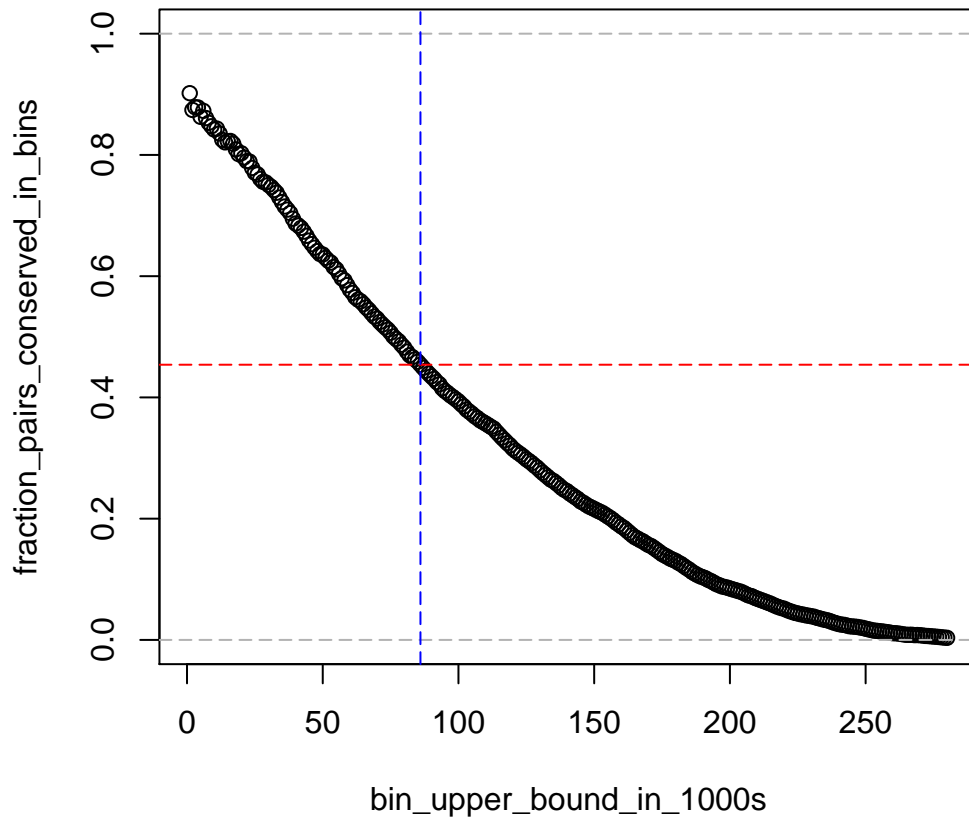

**Bin\_conservation\_minus\_bg\_CVG-1\_vs\_CVM-1**  
**PD-0.016862**

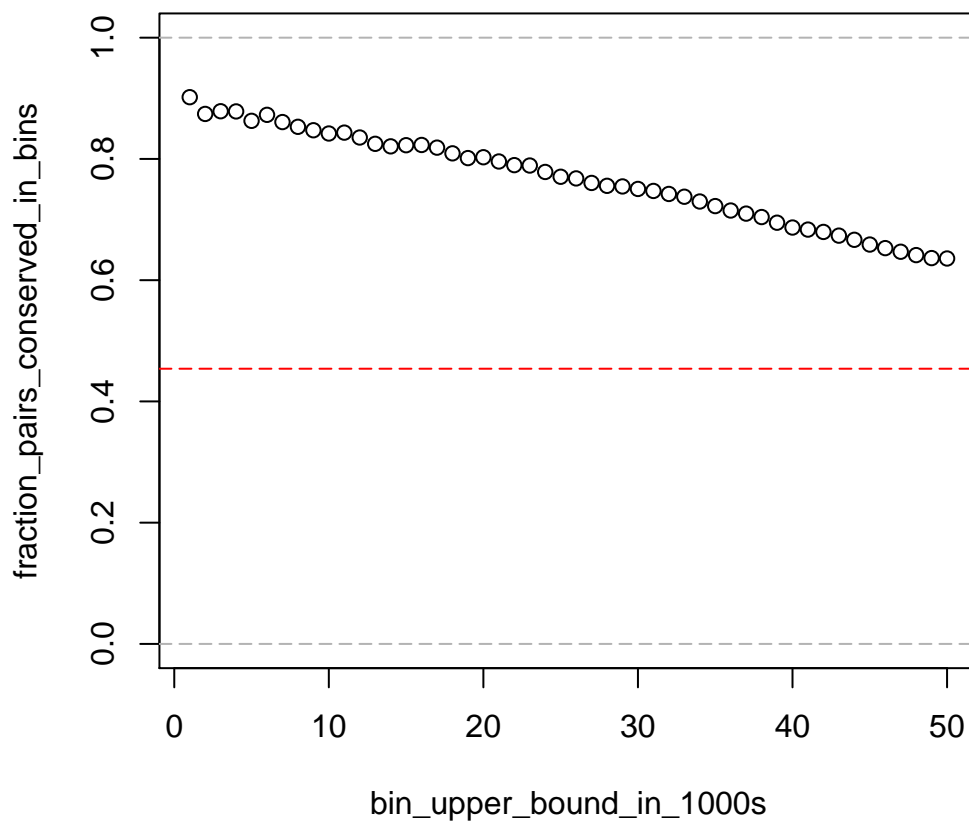

Supplement: s1 [file s1]

**Bin\_conservation\_minus\_bg\_Can18-4\_vs\_MA-1D**  
**PD-0.668516**

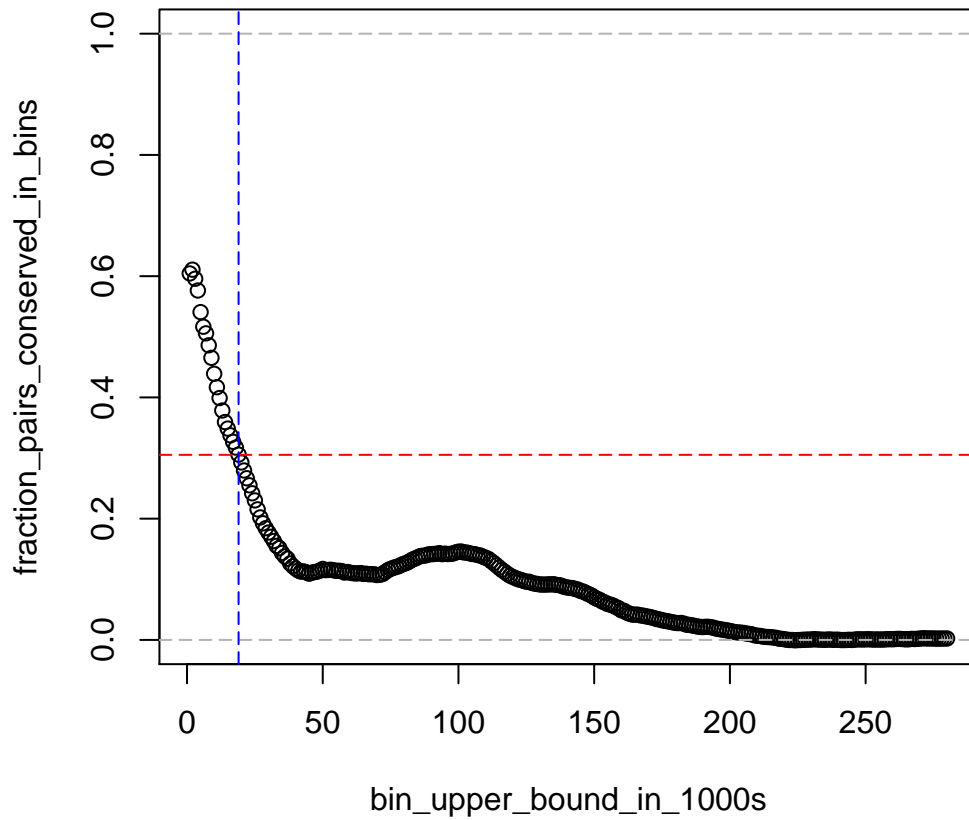

**Bin\_conservation\_minus\_bg\_Can18-4\_vs\_MA-1D**  
**PD-0.668516**

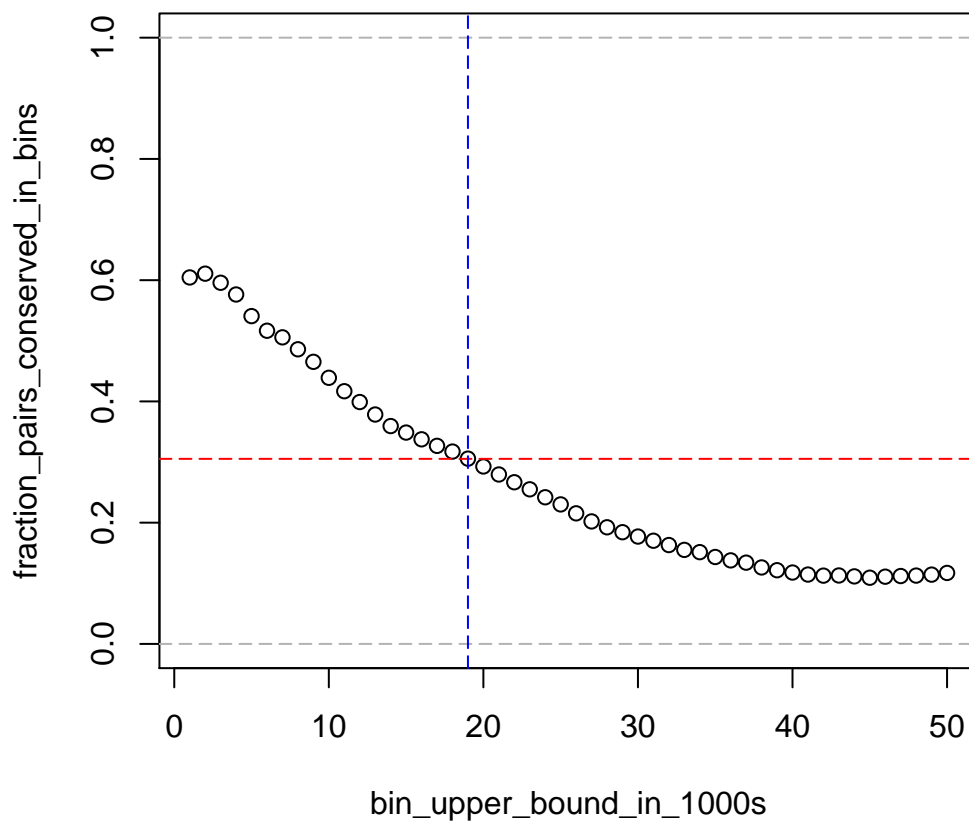

Supplement: s1 [file s1]

**Bin\_conservation\_minus\_bg\_AR158\_vs\_NE-JV-1**  
**PD-0.697205**

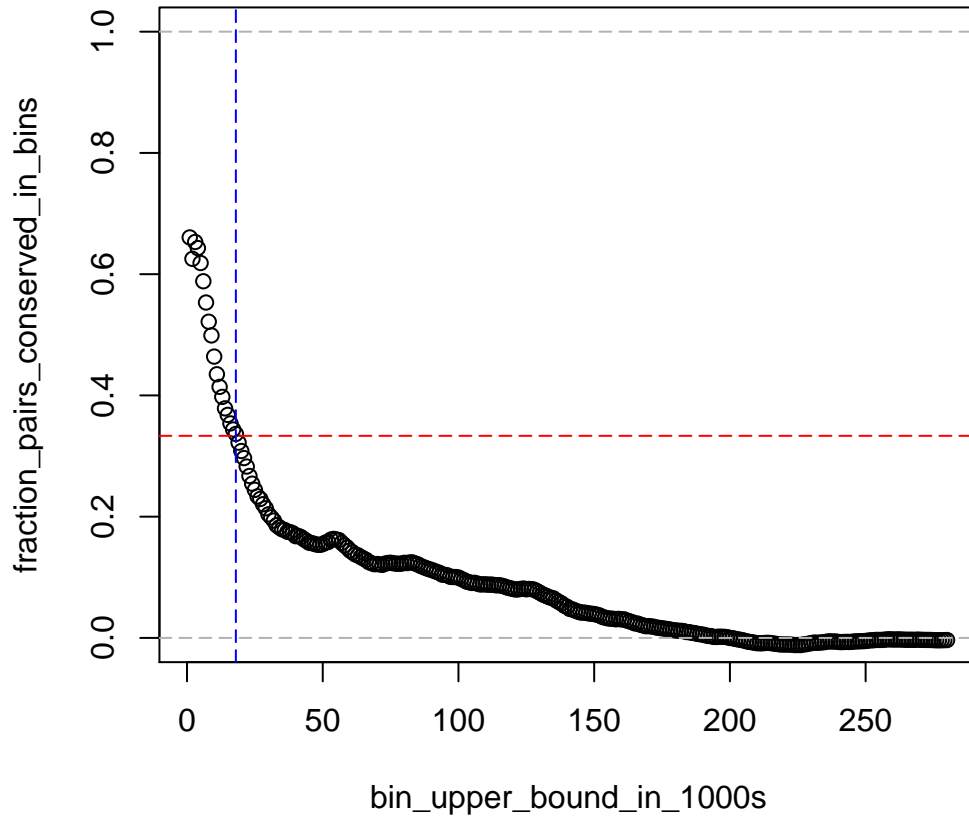

**Bin\_conservation\_minus\_bg\_AR158\_vs\_NE-JV-1**  
**PD-0.697205**

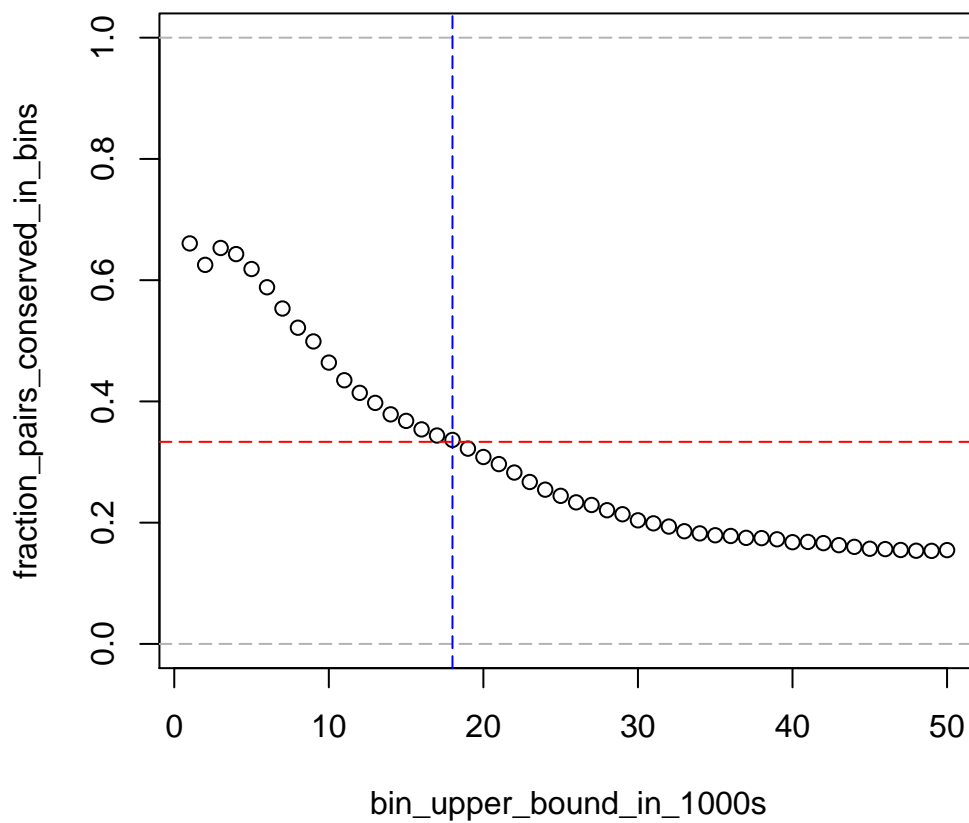

Supplement: s1 [file s1]

**Bin\_conservation\_minus\_bg\_AP110A\_vs\_FR483**  
**PD-0.023283**

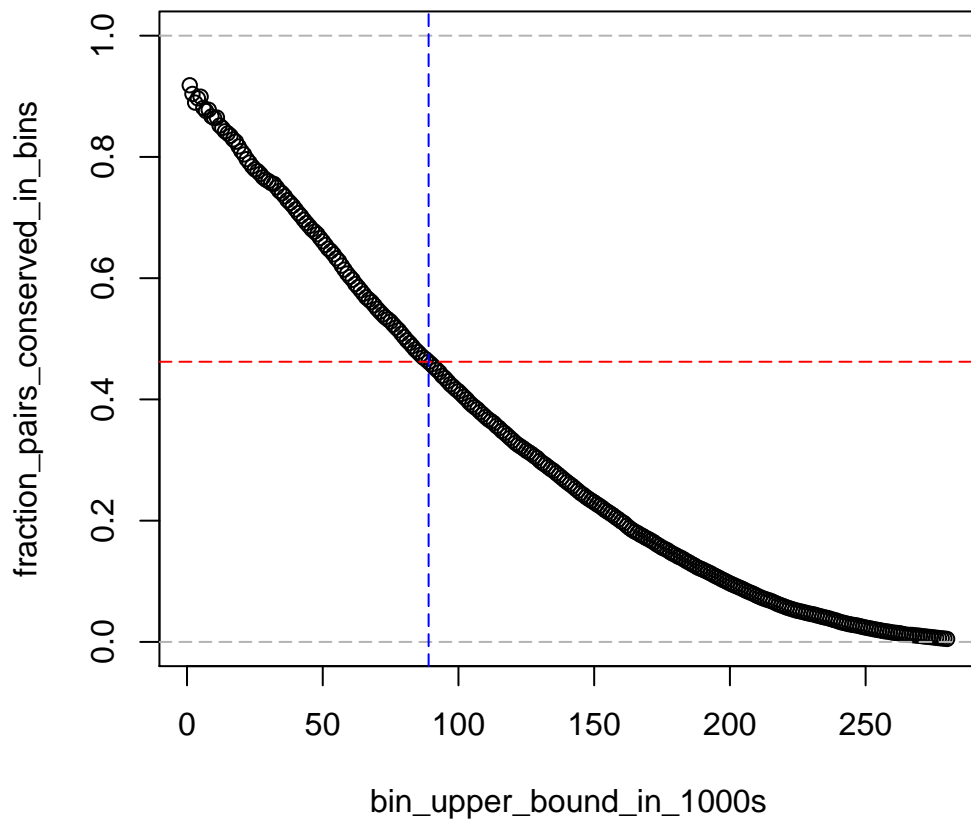

**Bin\_conservation\_minus\_bg\_AP110A\_vs\_FR483**  
**PD-0.023283**

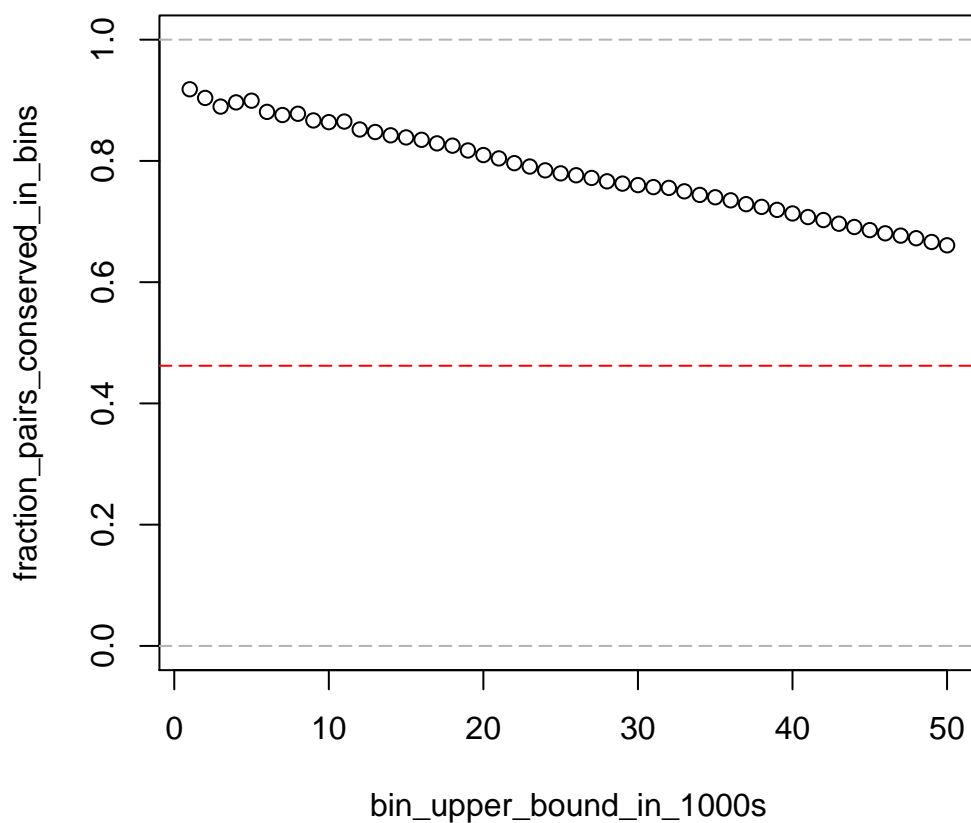

Supplement: s1 [file s1]

**Bin\_conservation\_minus\_bg\_Br0604L\_vs\_MT325**  
**PD-0.448296**

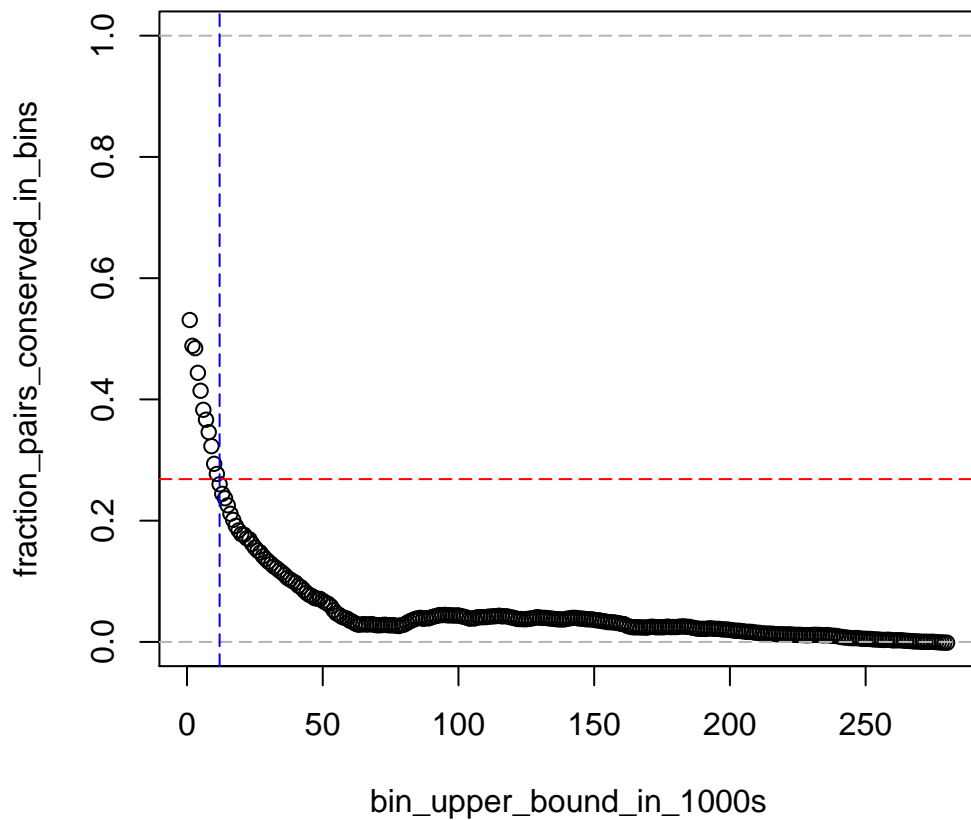

**Bin\_conservation\_minus\_bg\_Br0604L\_vs\_MT325**  
**PD-0.448296**

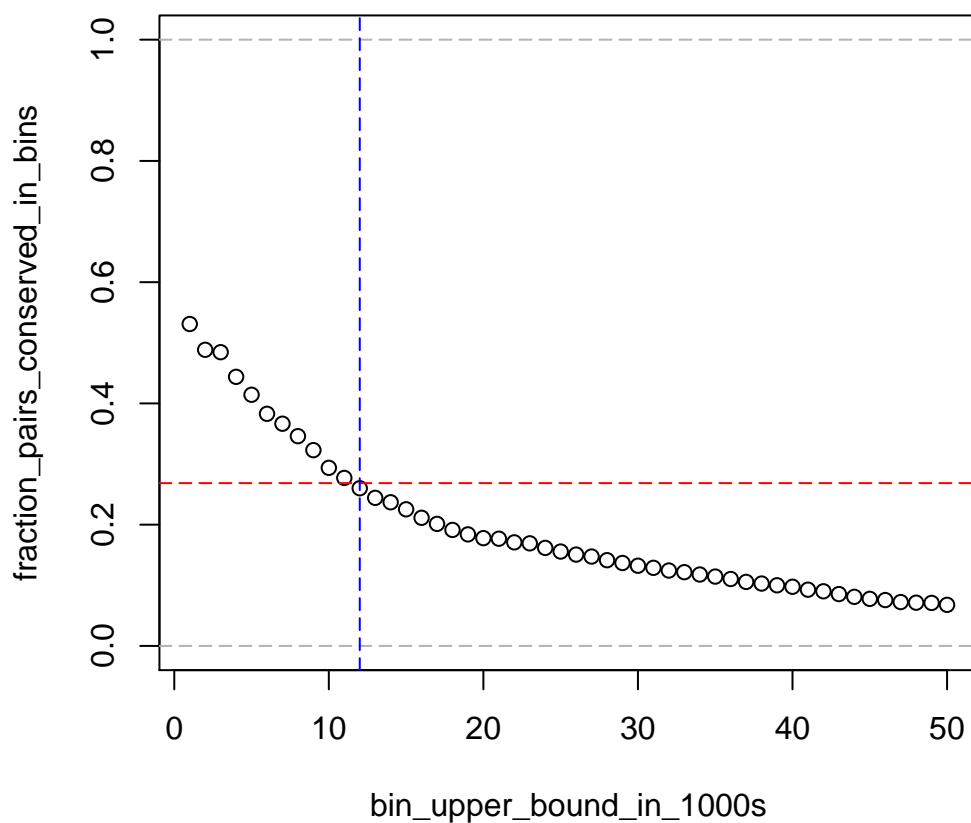

Supplement: s1 [file s1]

**Bin\_conservation\_minus\_bg\_CVR-1\_vs\_WI0606**  
**PD-0.46163**

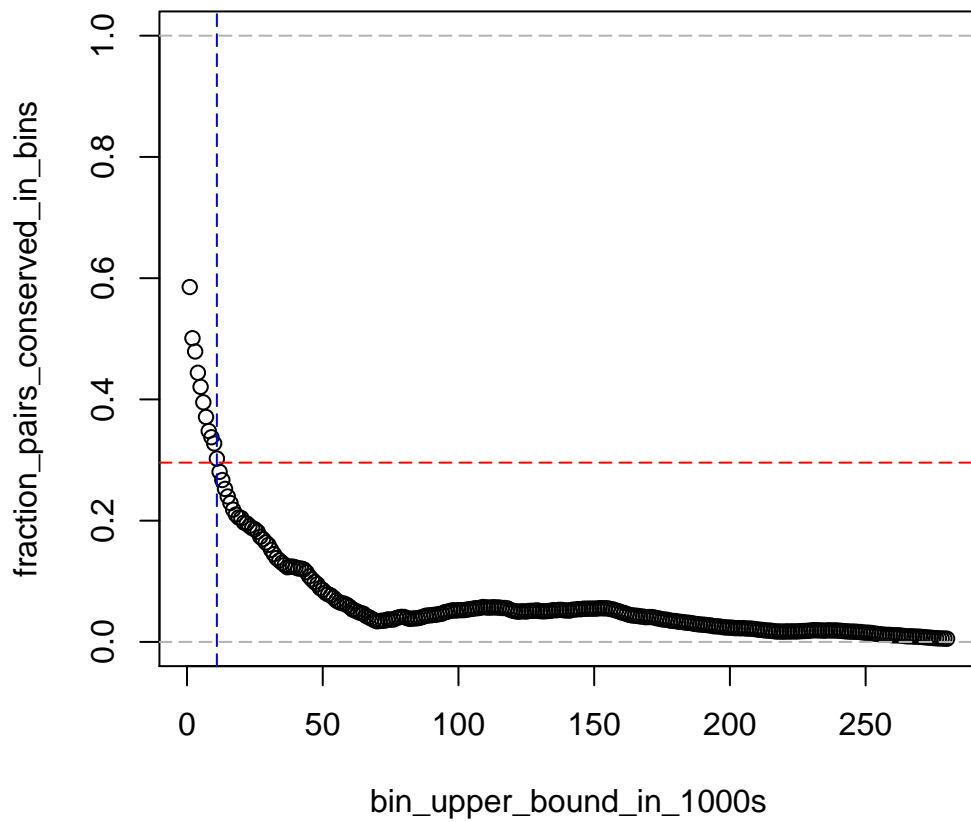

**Bin\_conservation\_minus\_bg\_CVR-1\_vs\_WI0606**  
**PD-0.46163**

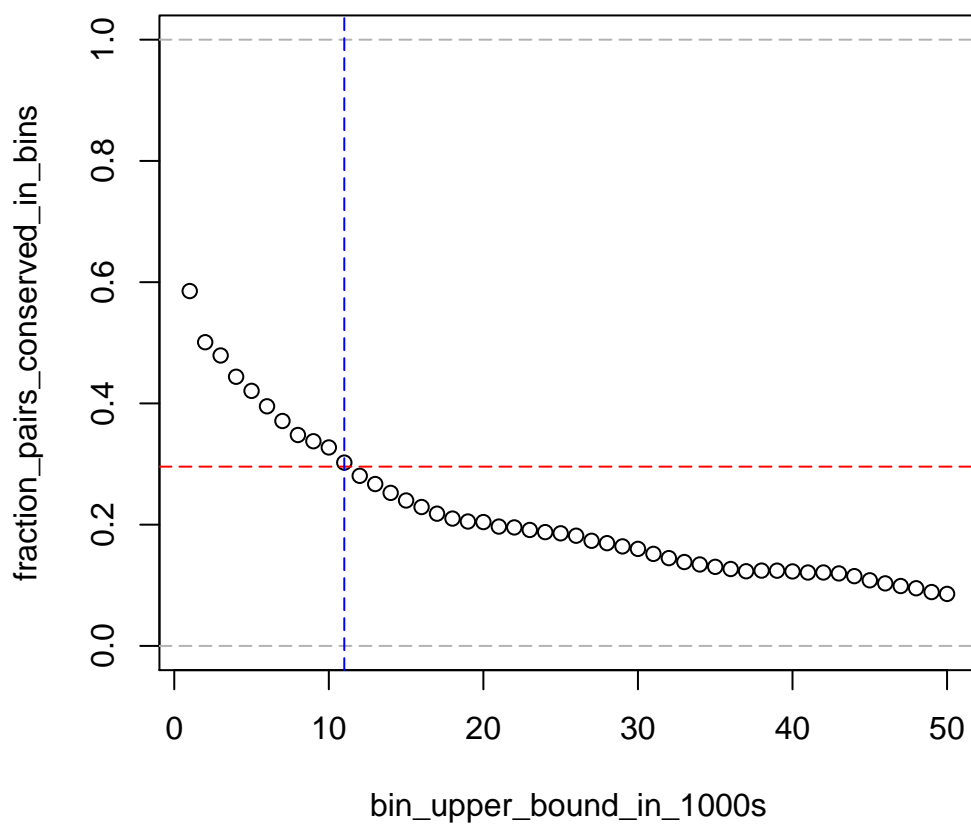

Supplement: s1 [file s1]

**Bin\_conservation\_minus\_bg\_NYs-1\_vs\_WI0606**  
**PD-0.706674**

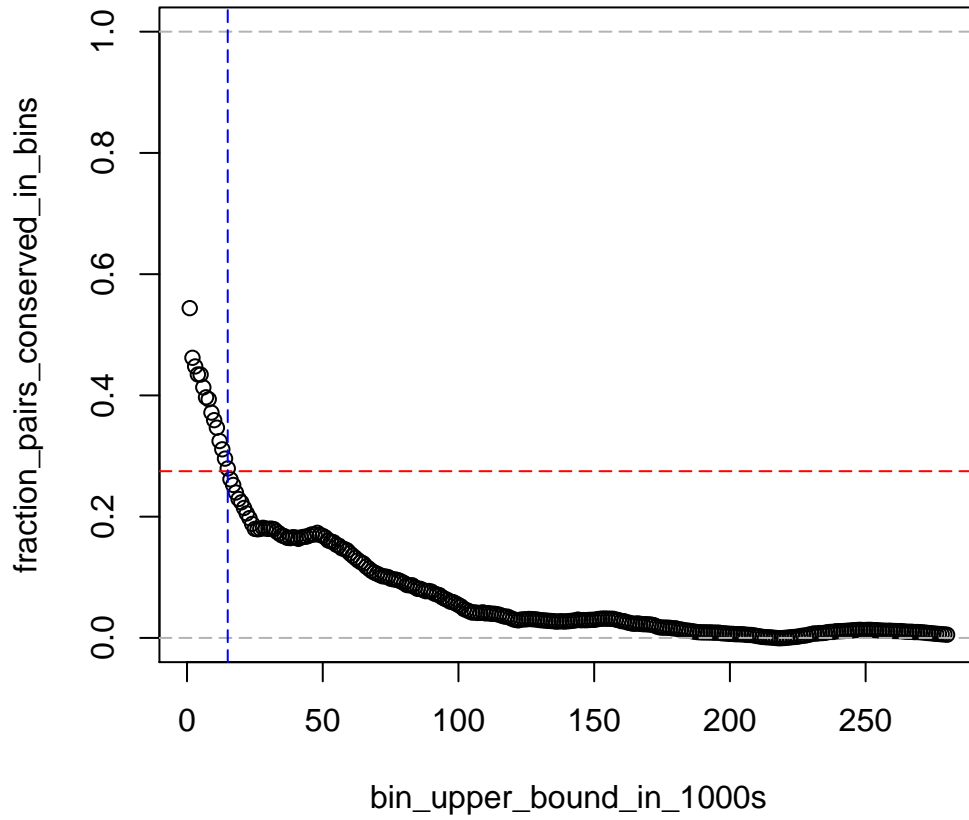

**Bin\_conservation\_minus\_bg\_NYs-1\_vs\_WI0606**  
**PD-0.706674**

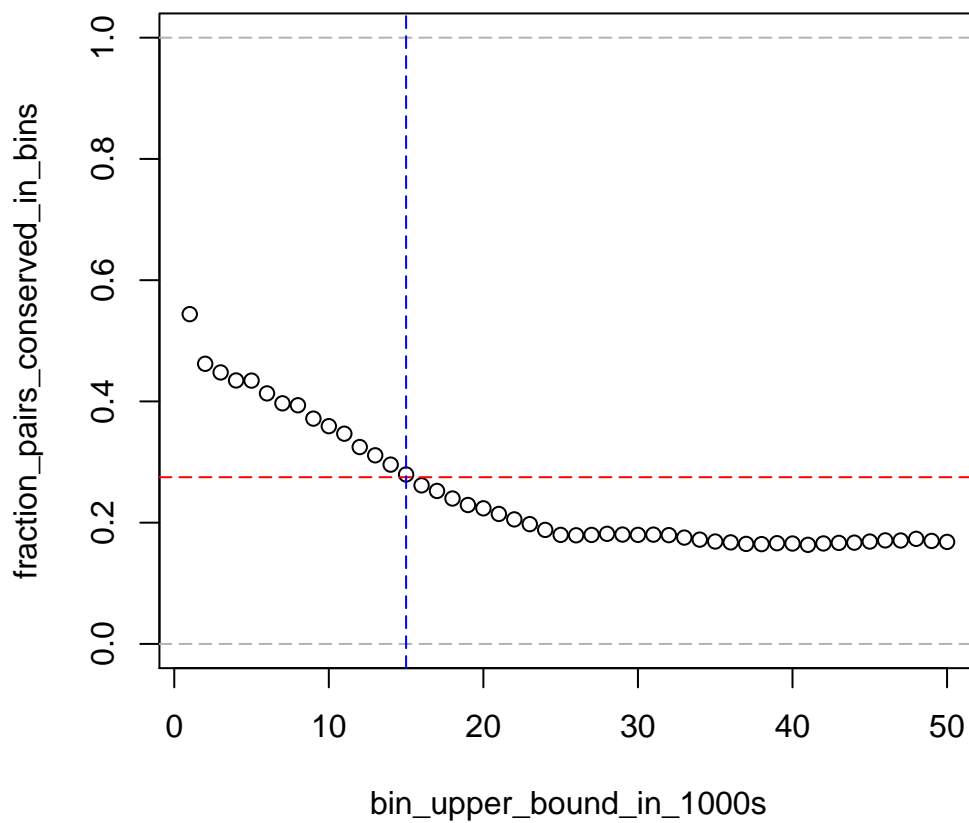

Supplement: s1 [file s1]

**Bin\_conservation\_minus\_bg\_MT325\_vs\_NE-JV-1**  
**PD-0.356446**

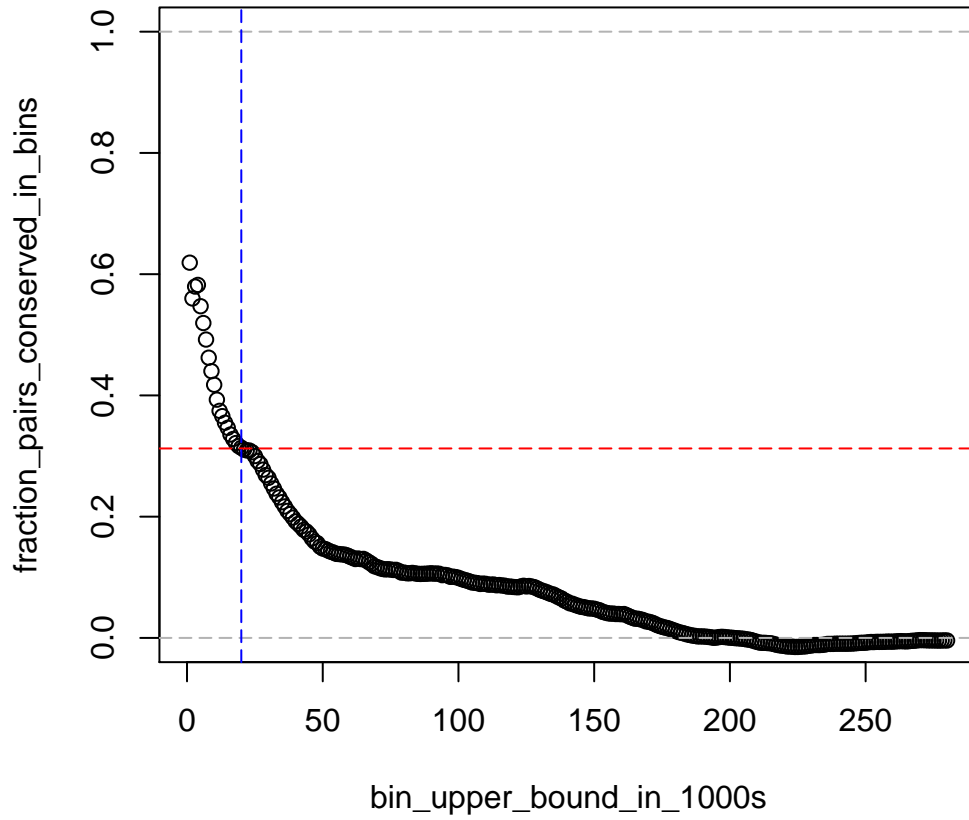

**Bin\_conservation\_minus\_bg\_MT325\_vs\_NE-JV-1**  
**PD-0.356446**

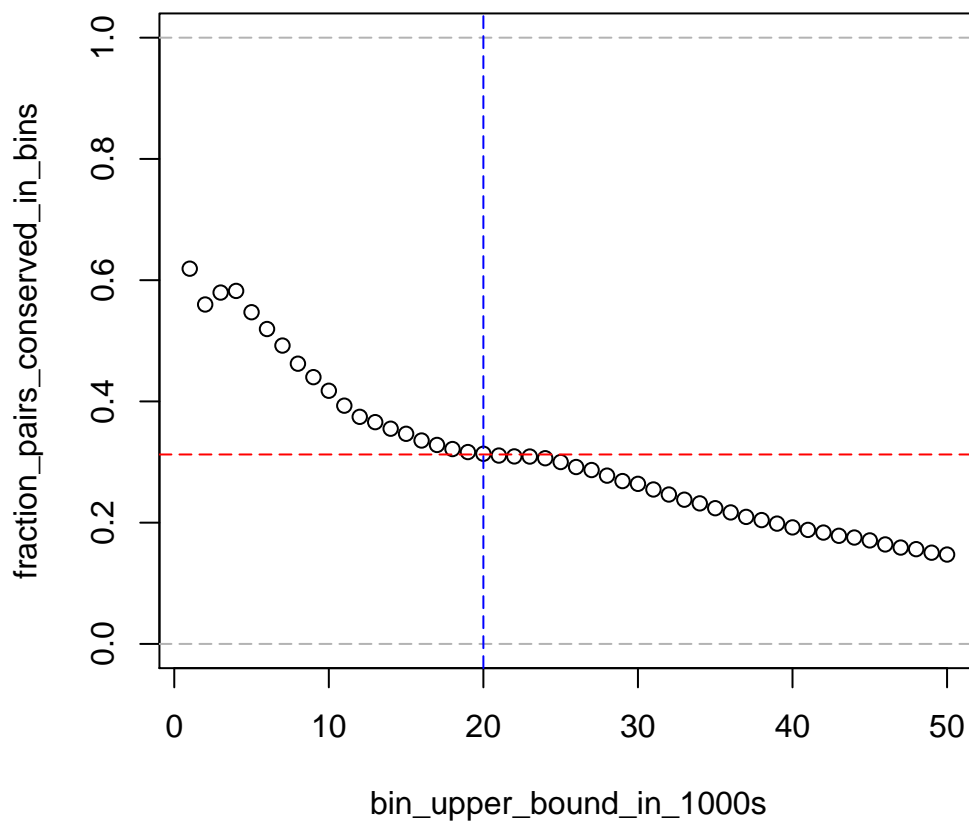

Supplement: s1 [file s1]

**Bin\_conservation\_minus\_bg\_FR483\_vs\_NE-JV-2**  
**PD-0.465026**

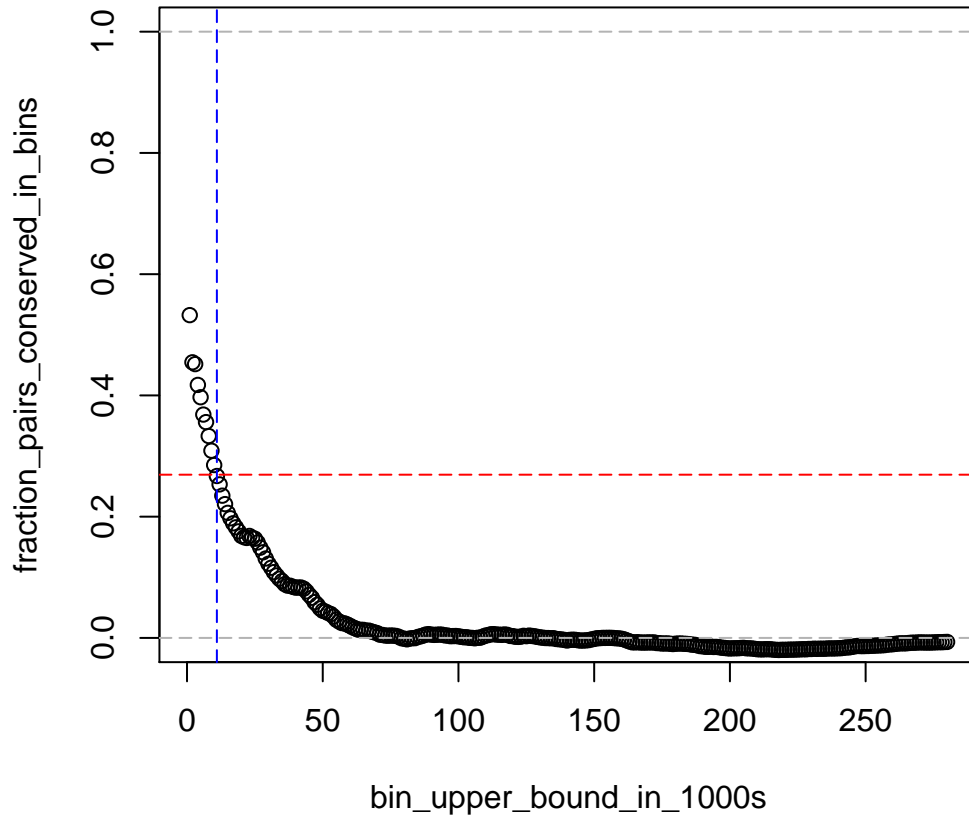

**Bin\_conservation\_minus\_bg\_FR483\_vs\_NE-JV-2**  
**PD-0.465026**

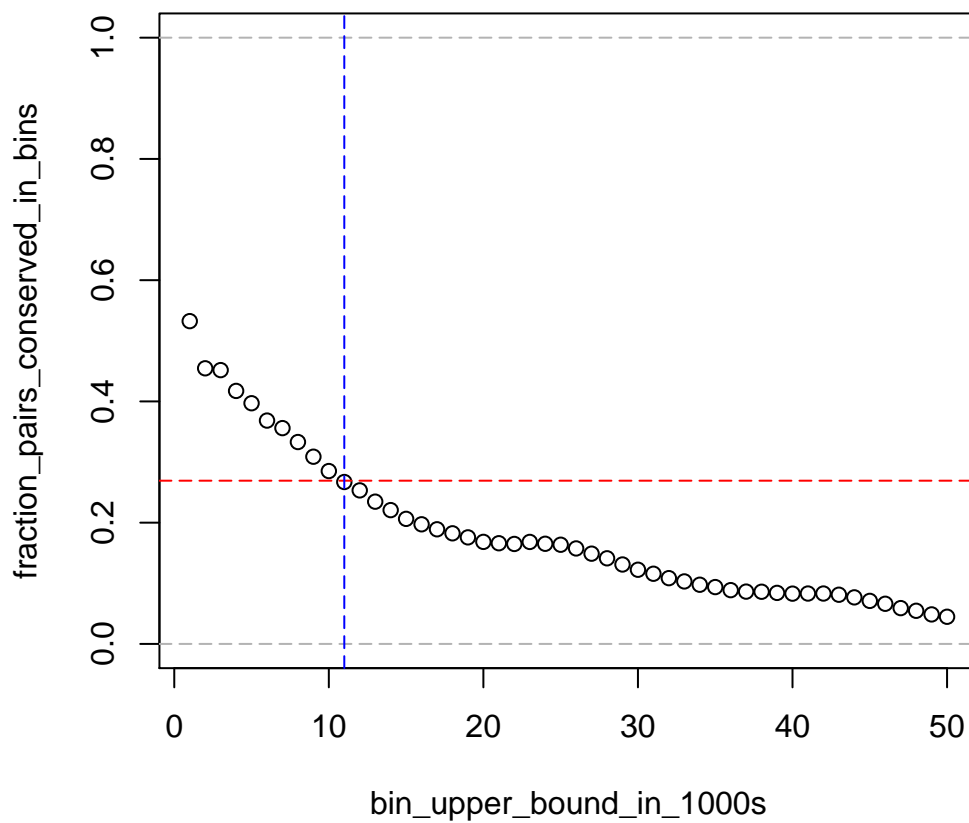

Supplement: s1 [file s1]

**Bin\_conservation\_minus\_bg\_KS1B\_vs\_NW665.2**  
**PD-0.65452**

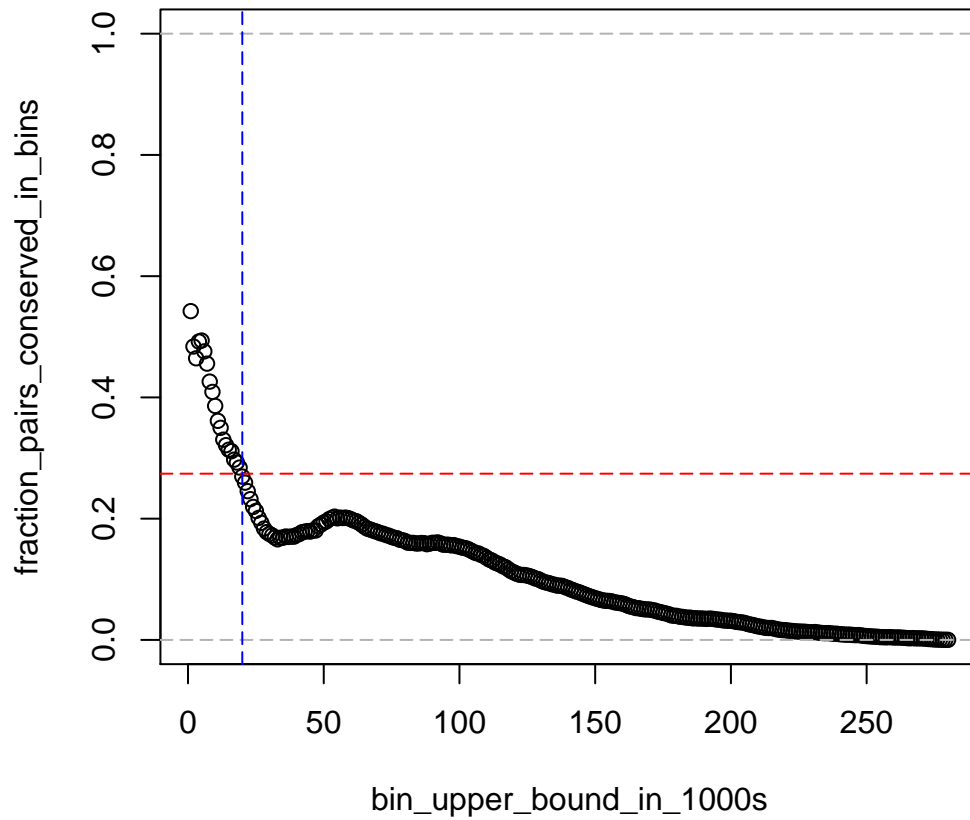

**Bin\_conservation\_minus\_bg\_KS1B\_vs\_NW665.2**  
**PD-0.65452**

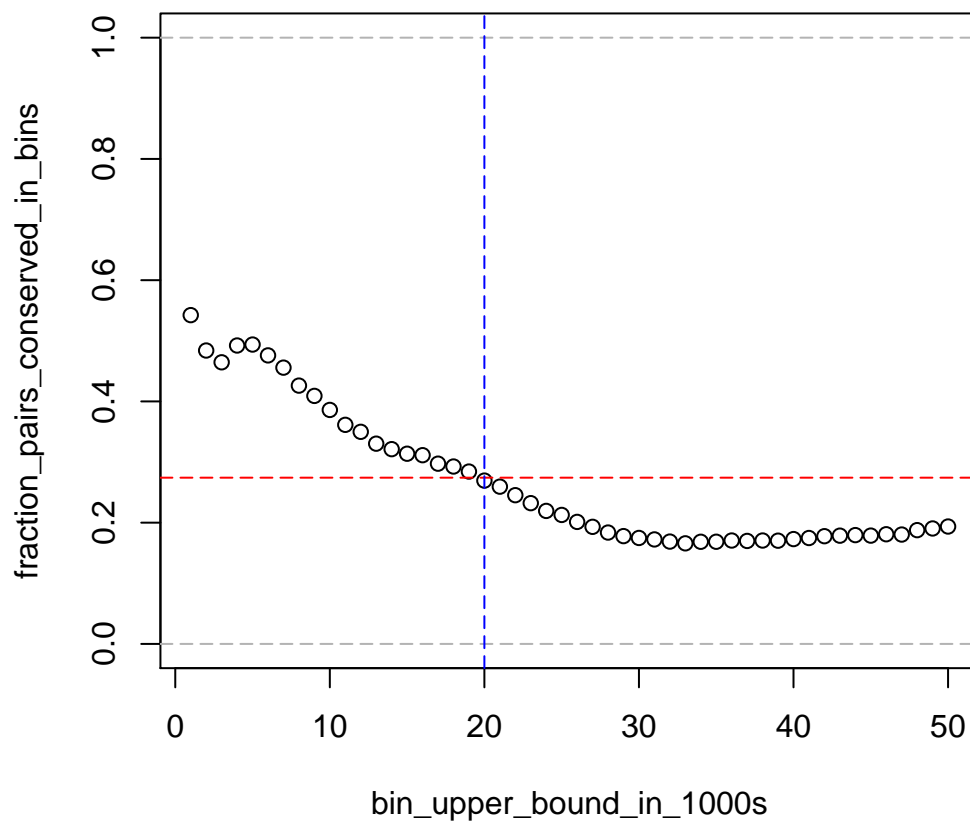

Supplement: s1 [file s1]

**Bin\_conservation\_minus\_bg\_IL-5-2s1\_vs\_MA-1E**  
**PD-0.148726**

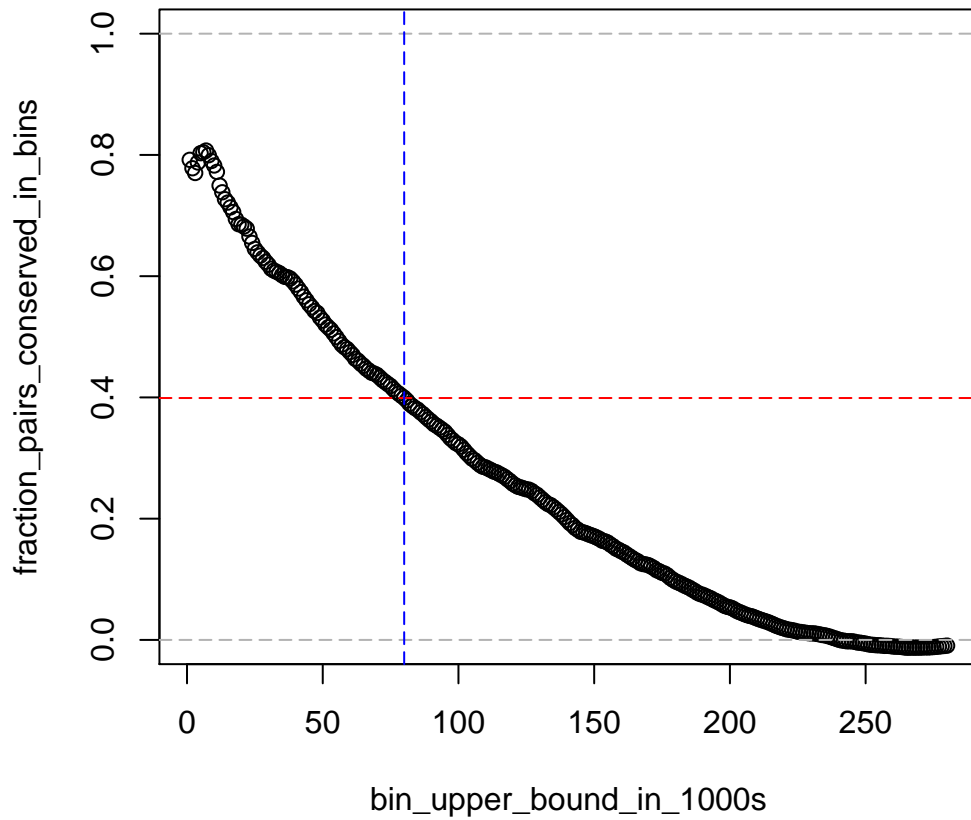

**Bin\_conservation\_minus\_bg\_IL-5-2s1\_vs\_MA-1E**  
**PD-0.148726**

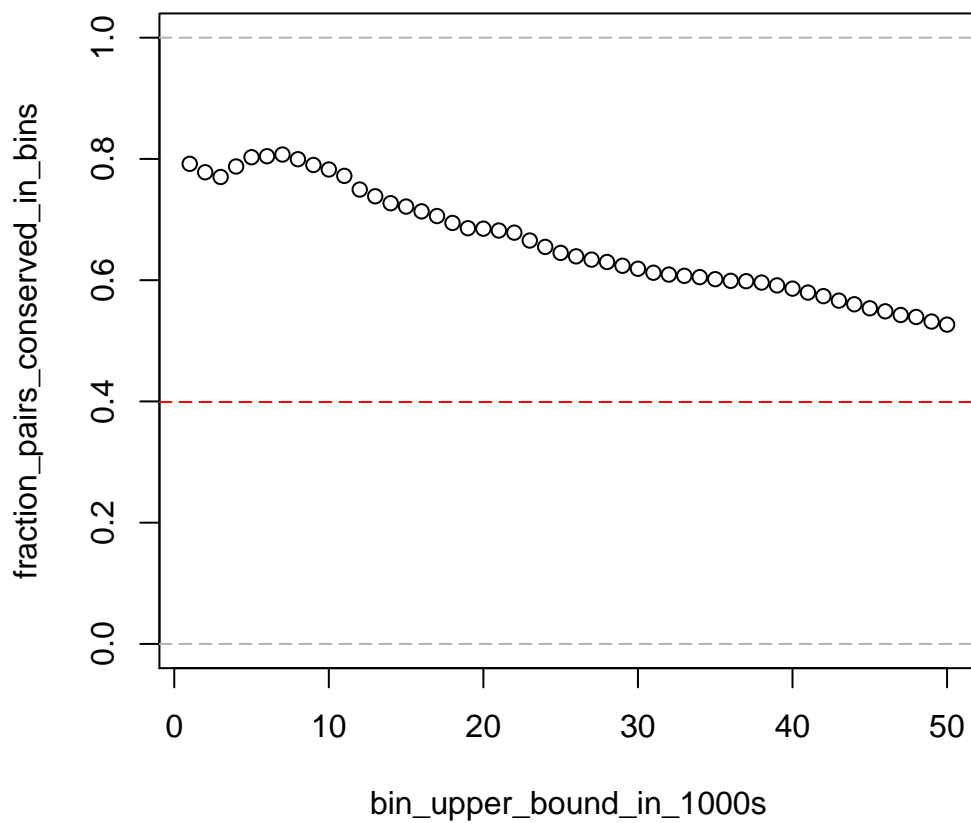

Supplement: s1 [file s1]

**Bin\_conservation\_minus\_bg\_Canal-1\_vs\_NE-JV-4**  
**PD-0.682266**

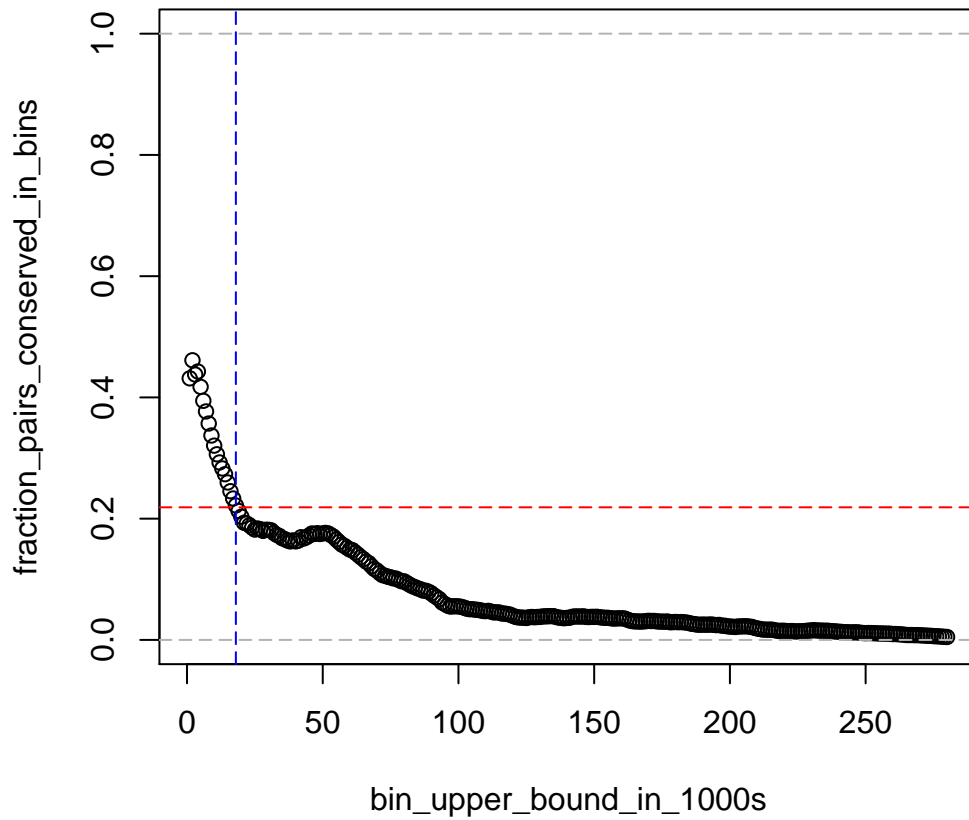

**Bin\_conservation\_minus\_bg\_Canal-1\_vs\_NE-JV-4**  
**PD-0.682266**

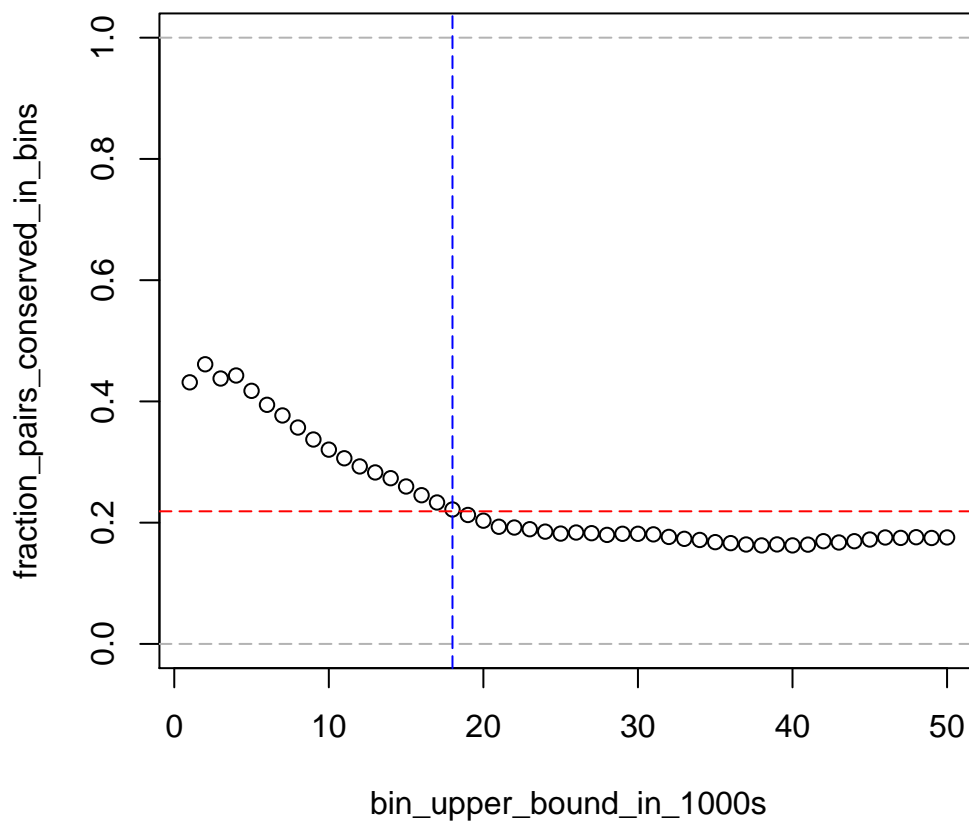

Supplement: s1 [file s1]

**Bin\_conservation\_minus\_bg\_NE-JV-1\_vs\_TN603.4.2**  
**PD-0.483542**

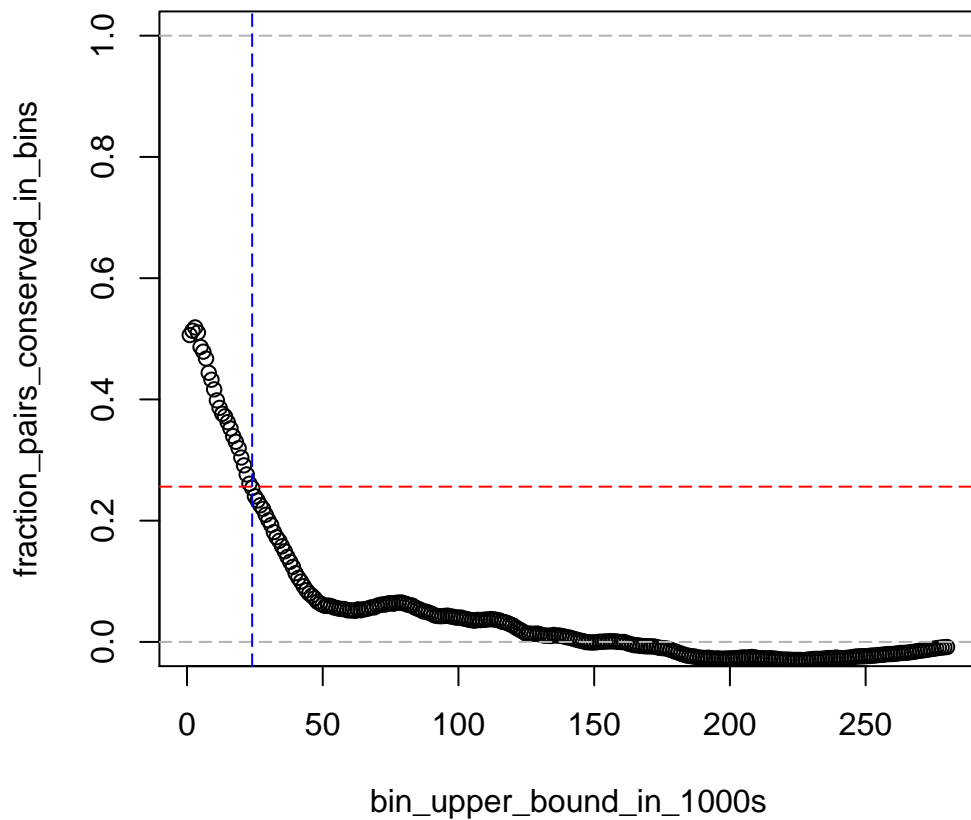

**Bin\_conservation\_minus\_bg\_NE-JV-1\_vs\_TN603.4.2**  
**PD-0.483542**

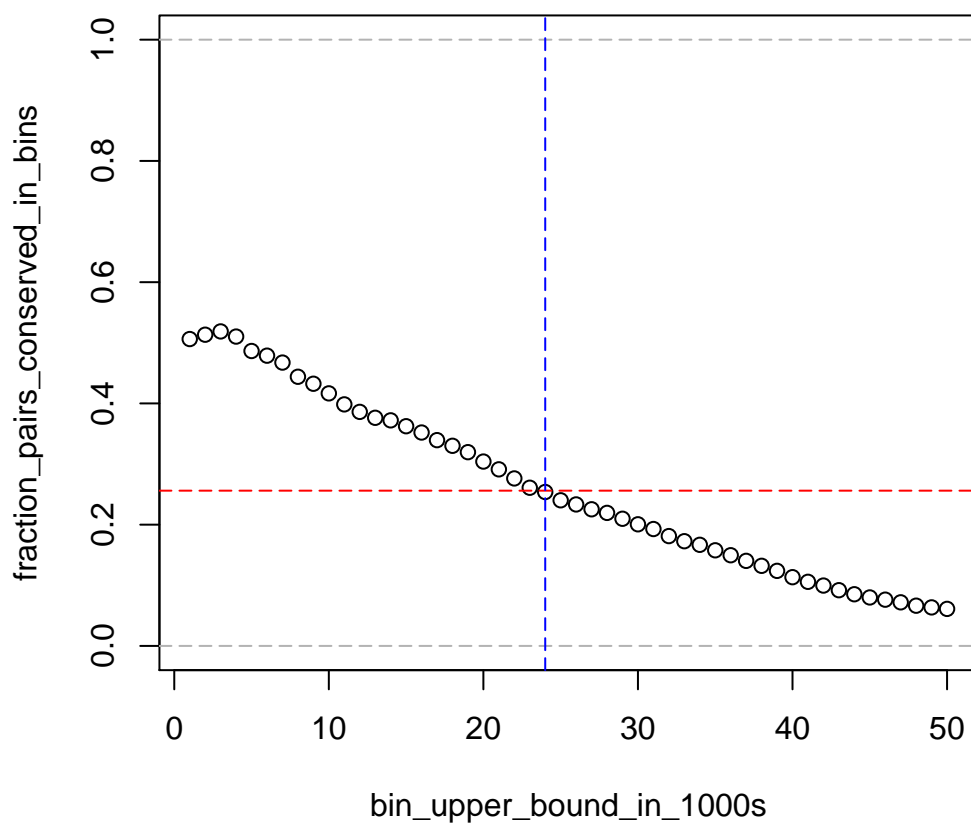

Supplement: s1 [file s1]

**Bin\_conservation\_minus\_bg\_ATCV1\_vs\_NY-2B**  
**PD-0.704711**

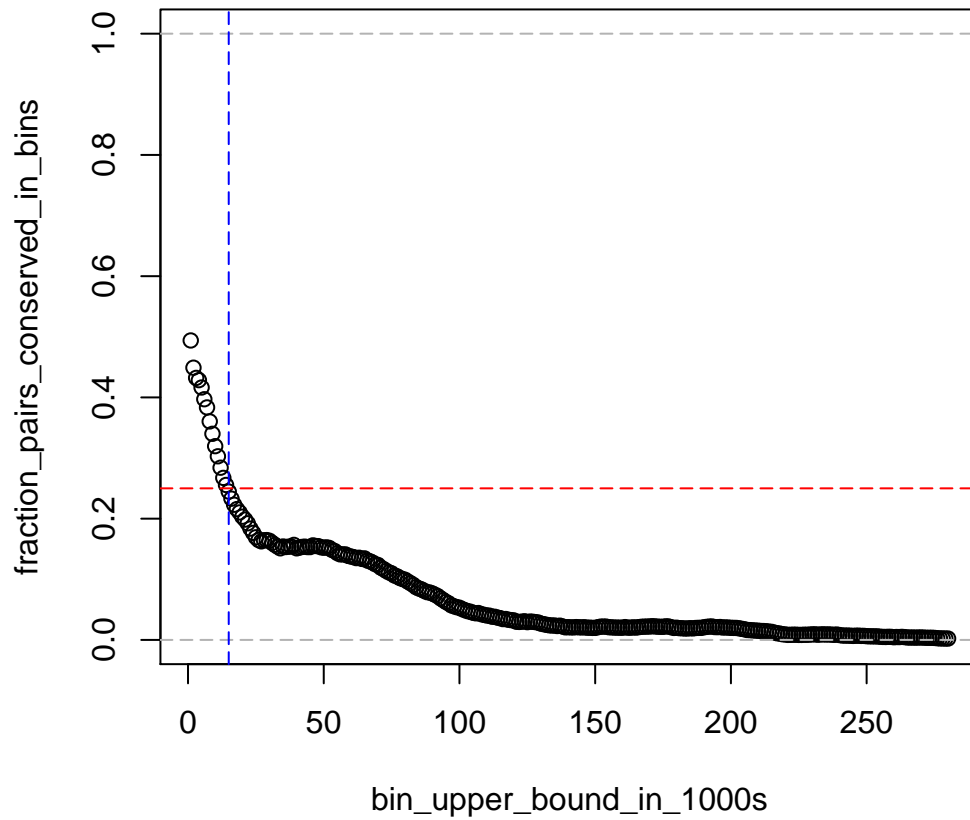

**Bin\_conservation\_minus\_bg\_ATCV1\_vs\_NY-2B**  
**PD-0.704711**

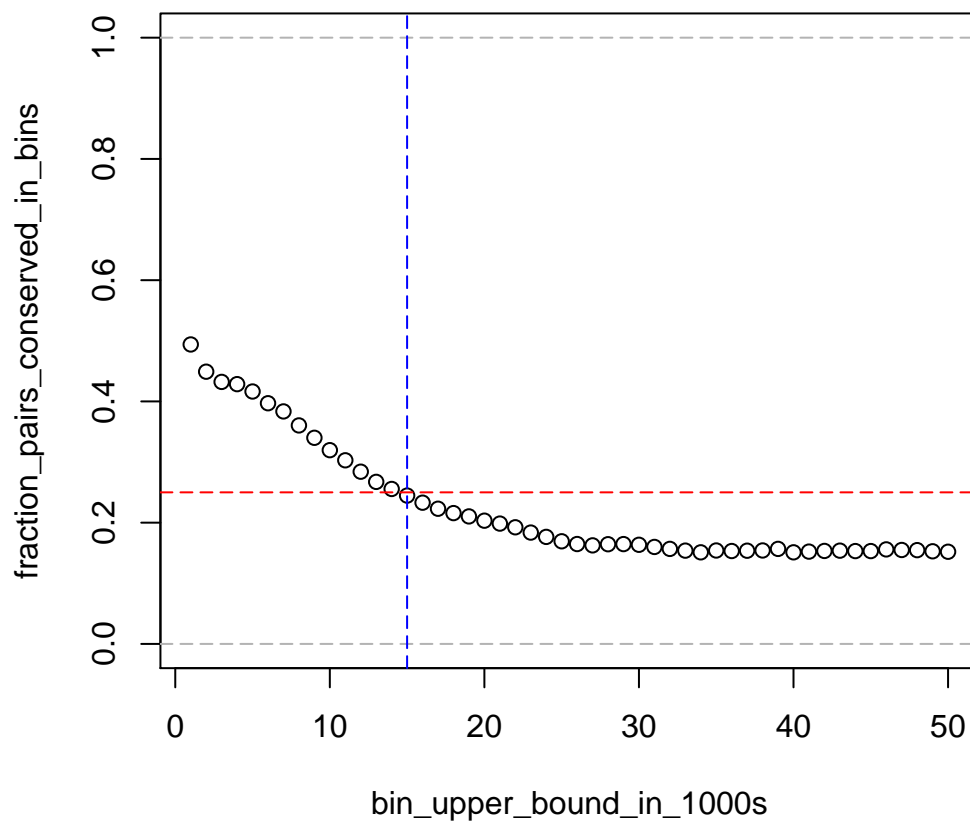

Supplement: s1 [file s1]

**Bin\_conservation\_minus\_bg\_CVM-1\_vs\_FR483**  
**PD-0.020107**

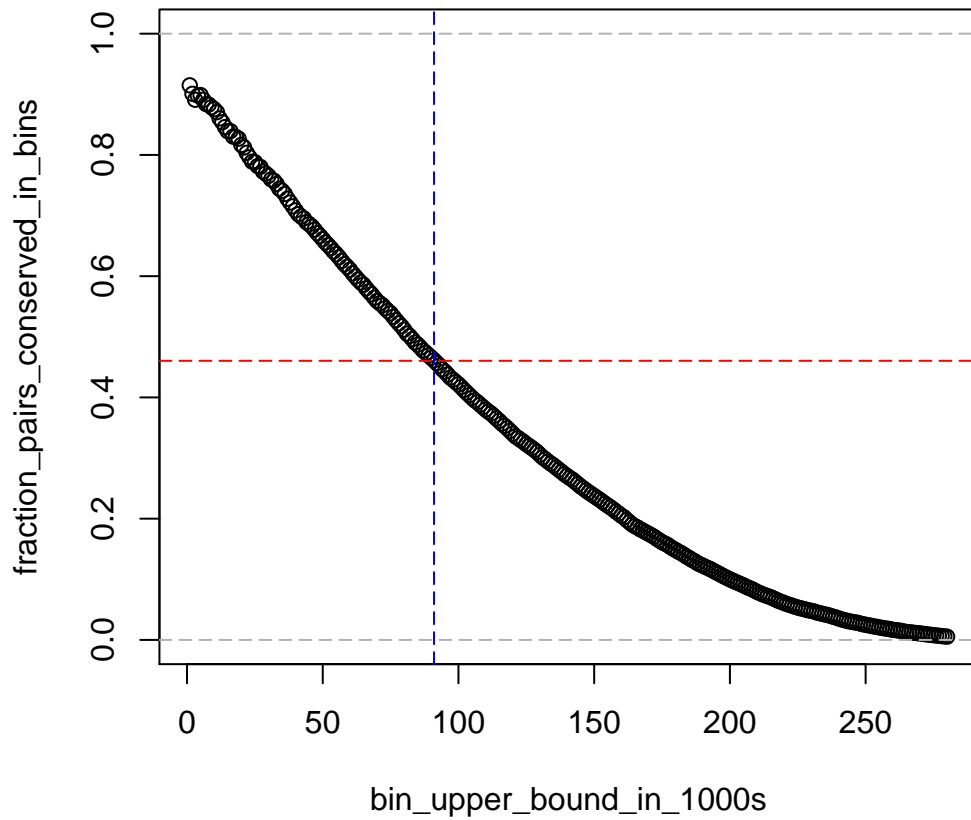

**Bin\_conservation\_minus\_bg\_CVM-1\_vs\_FR483**  
**PD-0.020107**

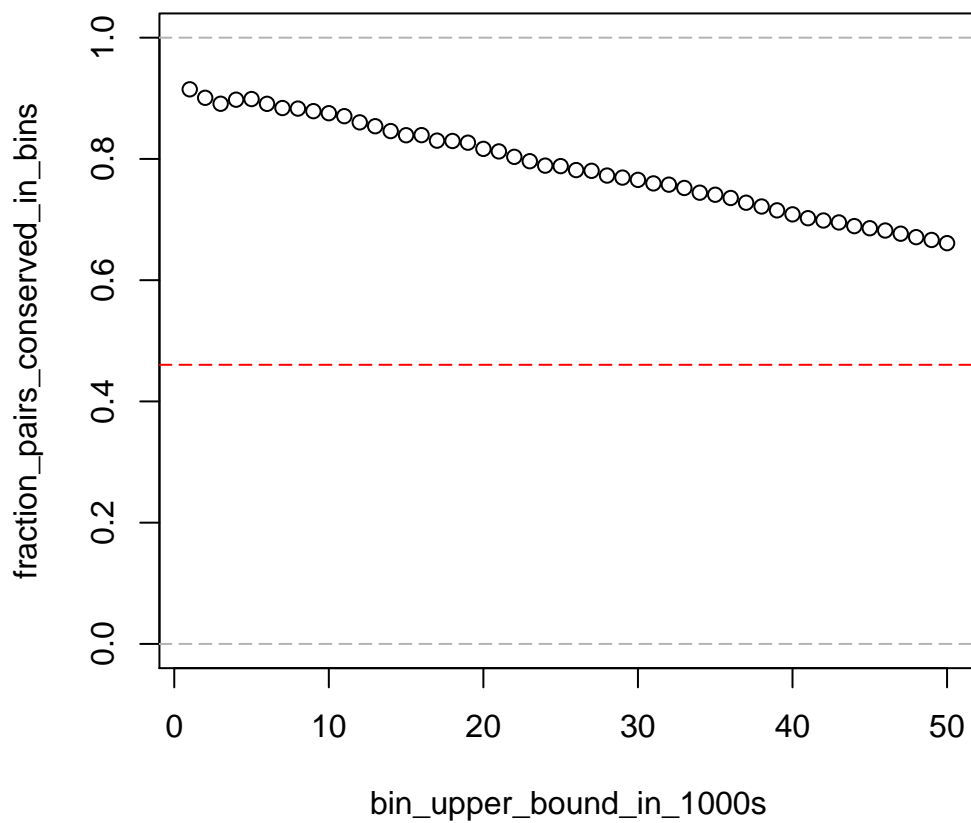

Supplement: s1 [file s1]

**Bin\_conservation\_minus\_bg\_CVG-1\_vs\_GM0701.1**  
**PD-0.451553**

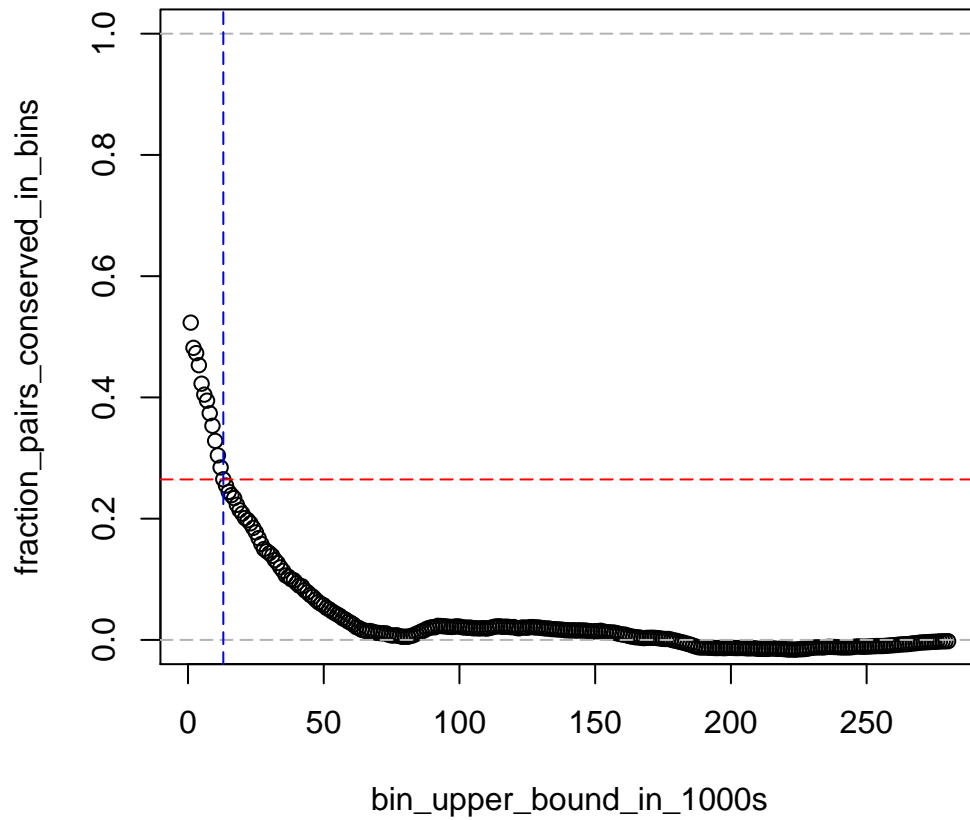

**Bin\_conservation\_minus\_bg\_CVG-1\_vs\_GM0701.1**  
**PD-0.451553**

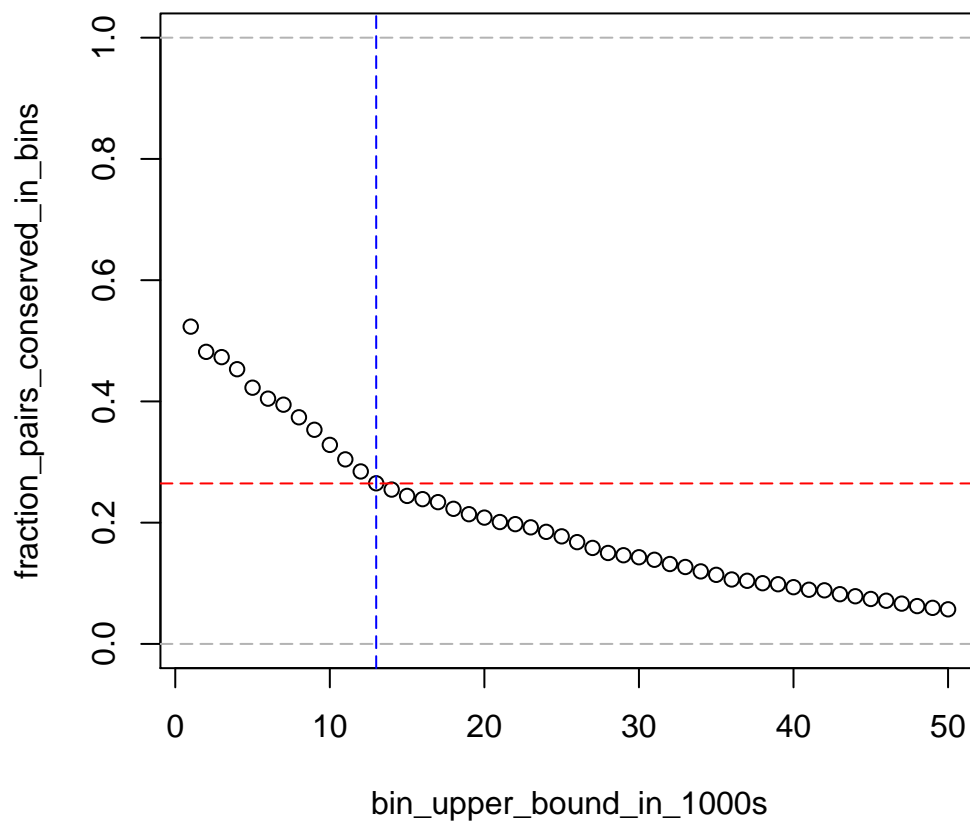

Supplement: s1 [file s1]

**Bin\_conservation\_minus\_bg\_CZ-2\_vs\_MN0810.1**  
**PD-0.462763**

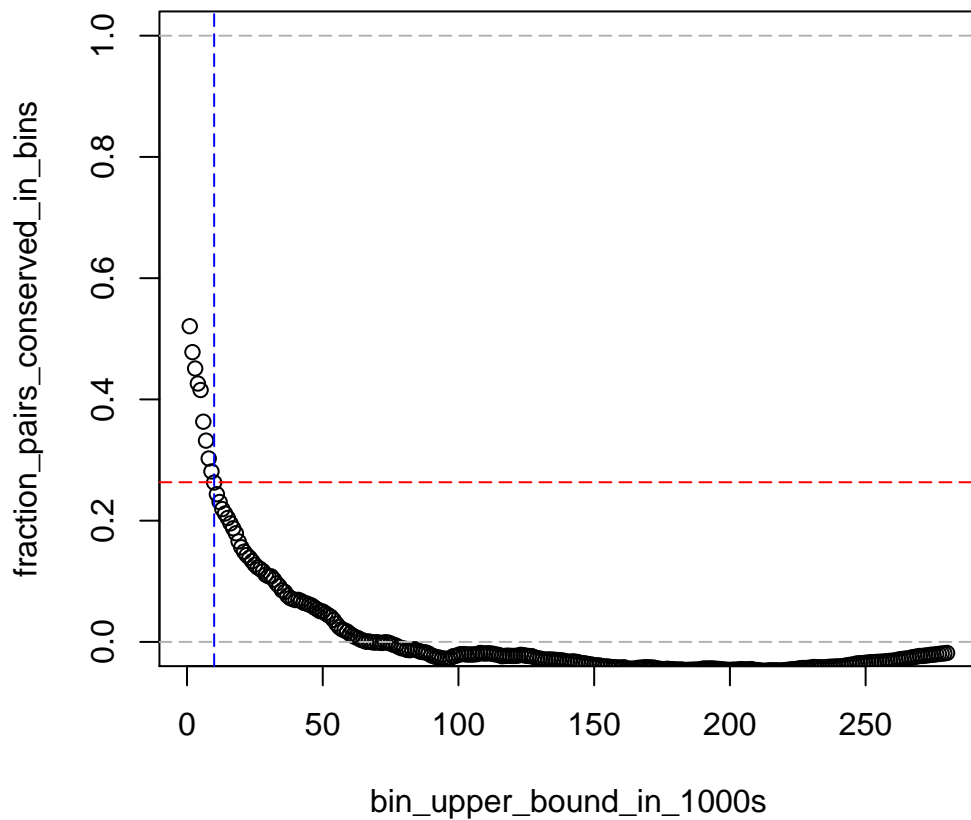

**Bin\_conservation\_minus\_bg\_CZ-2\_vs\_MN0810.1**  
**PD-0.462763**

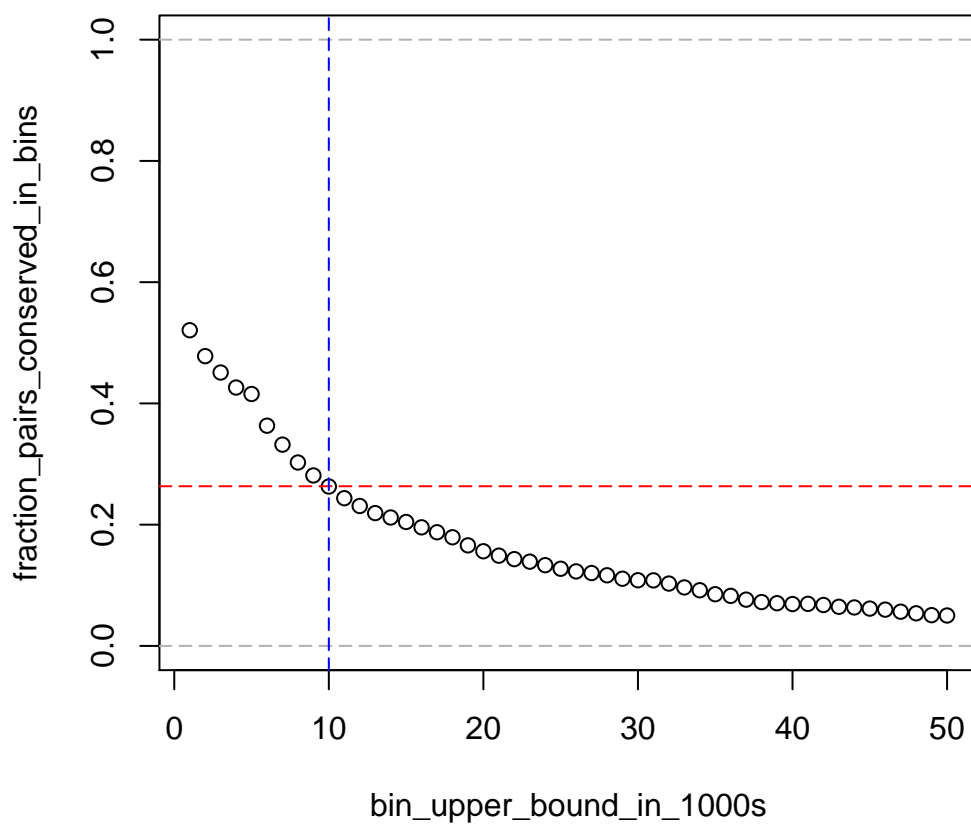

Supplement: s1 [file s1]

**Bin\_conservation\_minus\_bg\_GM0701.1\_vs\_IL-5-2s1**  
**PD-0.693081**

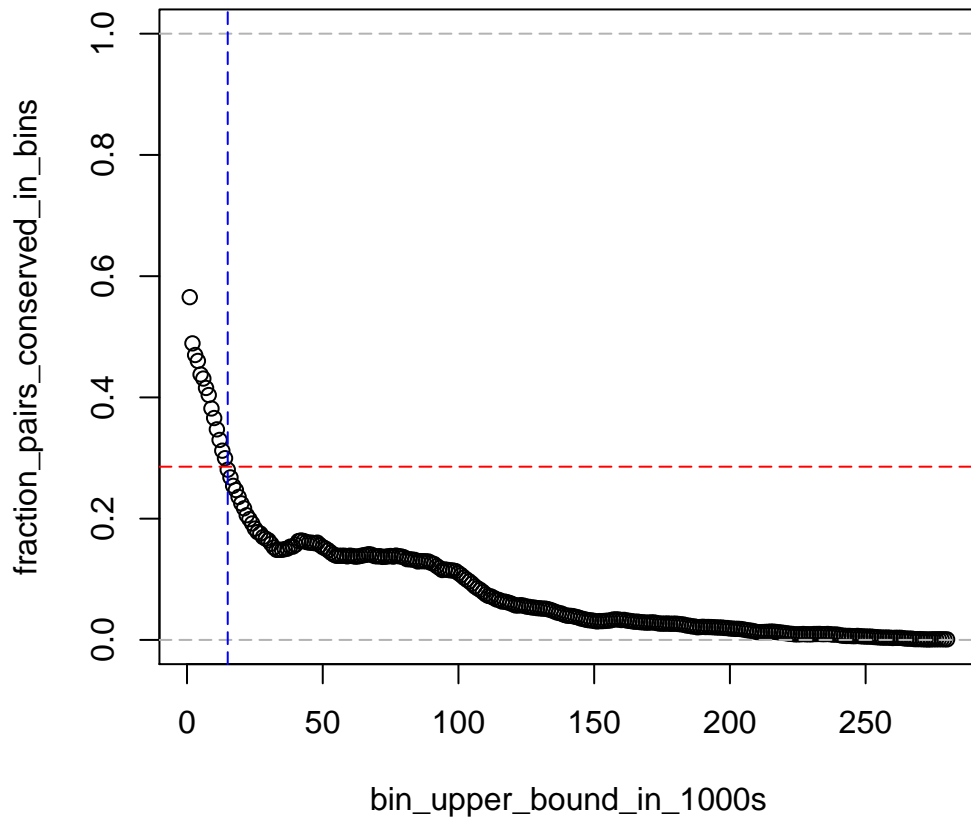

**Bin\_conservation\_minus\_bg\_GM0701.1\_vs\_IL-5-2s1**  
**PD-0.693081**

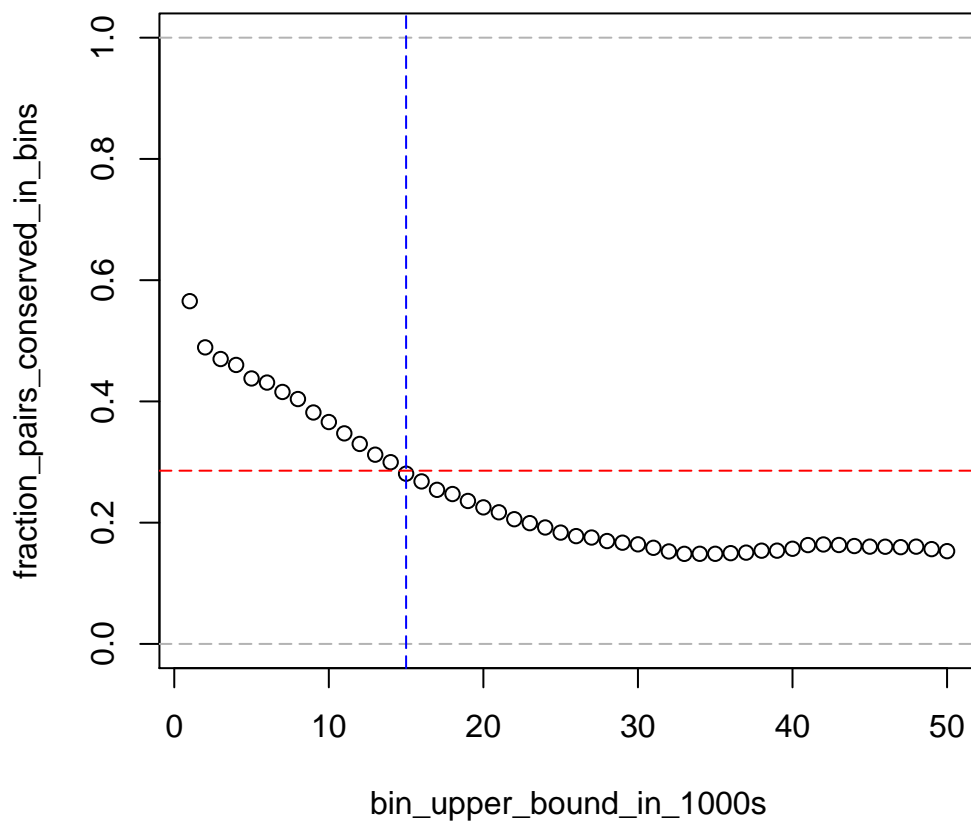

Supplement: s1 [file s1]

**Bin\_conservation\_minus\_bg\_AN69C\_vs\_NY2A**  
**PD-0.138798**

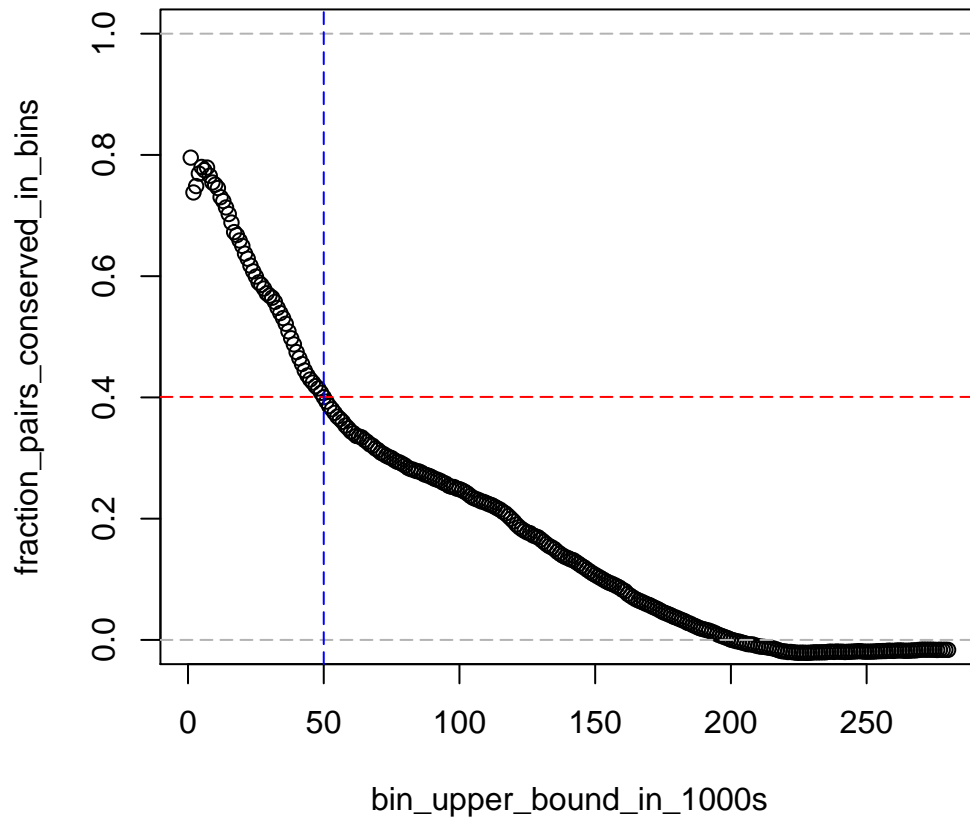

**Bin\_conservation\_minus\_bg\_AN69C\_vs\_NY2A**  
**PD-0.138798**

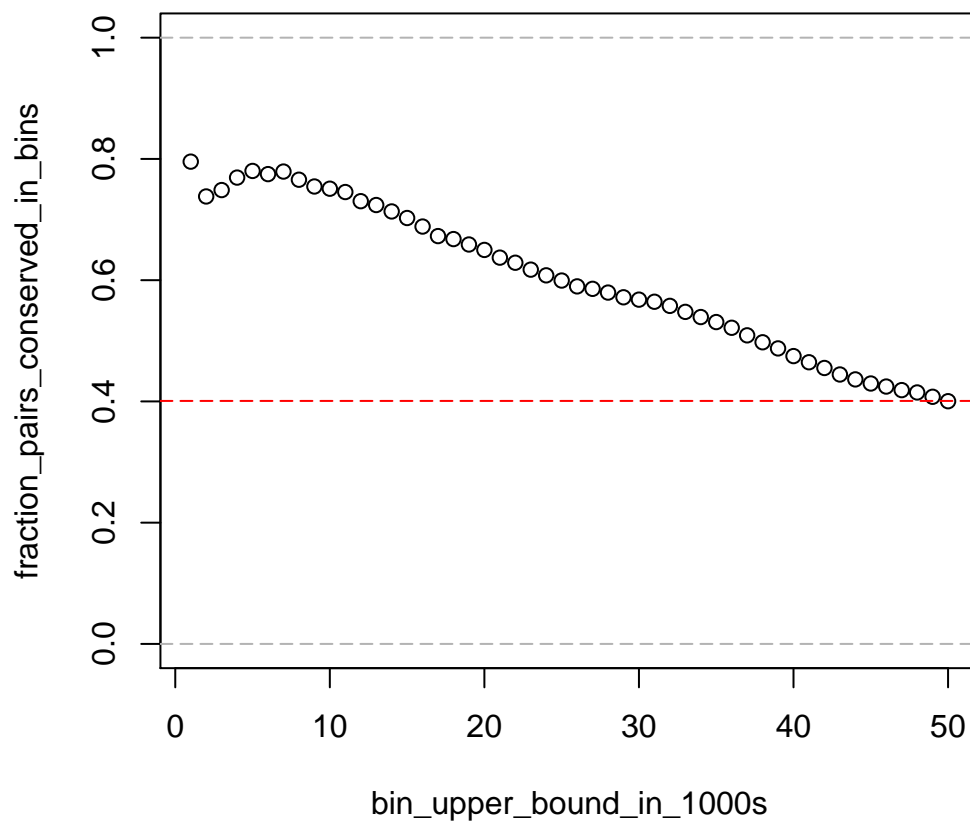

Supplement: s1 [file s1]

**Bin\_conservation\_minus\_bg\_CviKI\_vs\_IL-5-2s1**  
**PD-0.147619**

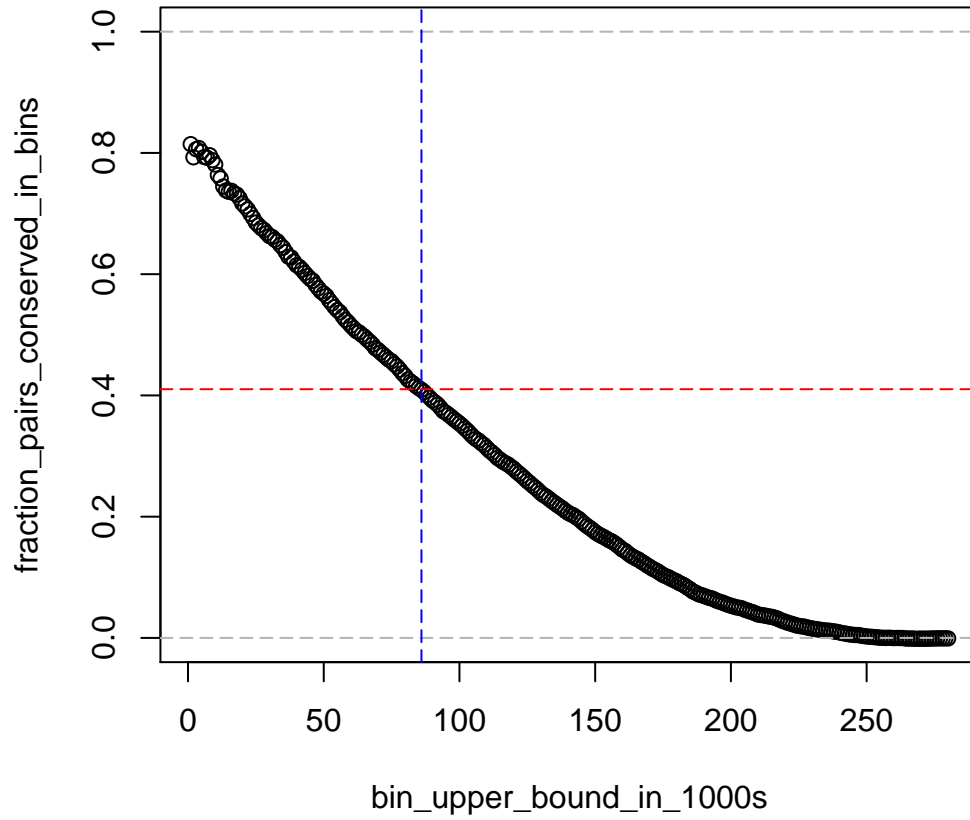

**Bin\_conservation\_minus\_bg\_CviKI\_vs\_IL-5-2s1**  
**PD-0.147619**

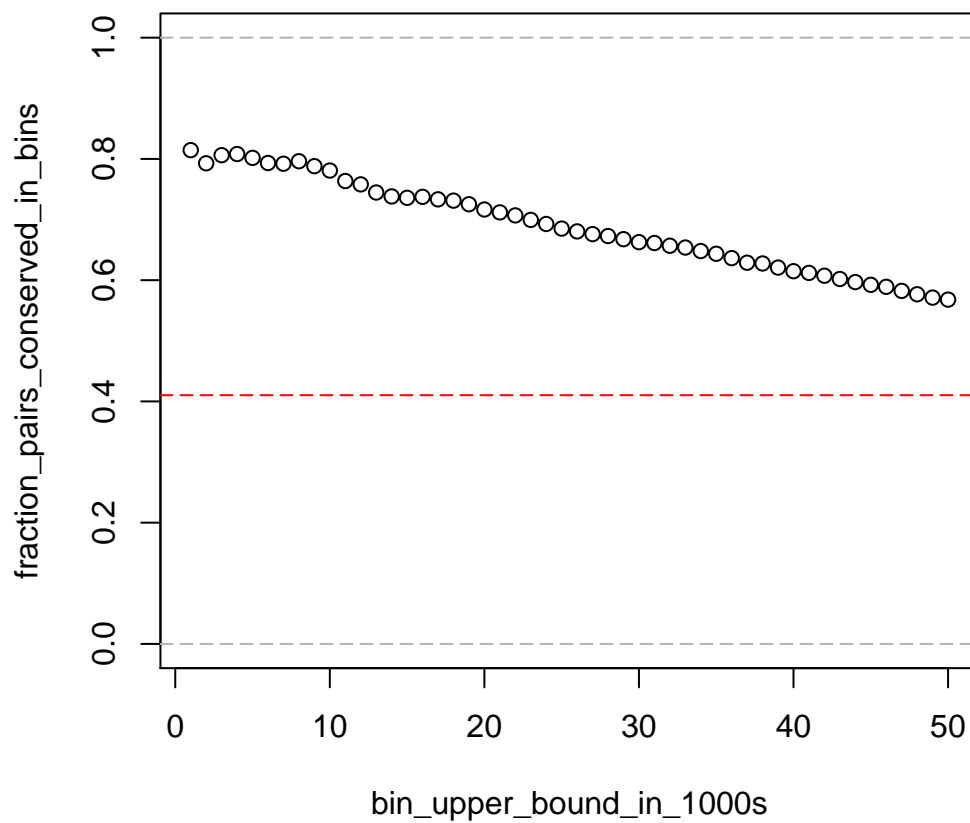

Supplement: s1 [file s1]

**Bin\_conservation\_minus\_bg\_CVG-1\_vs\_WI0606**  
**PD-0.465861**

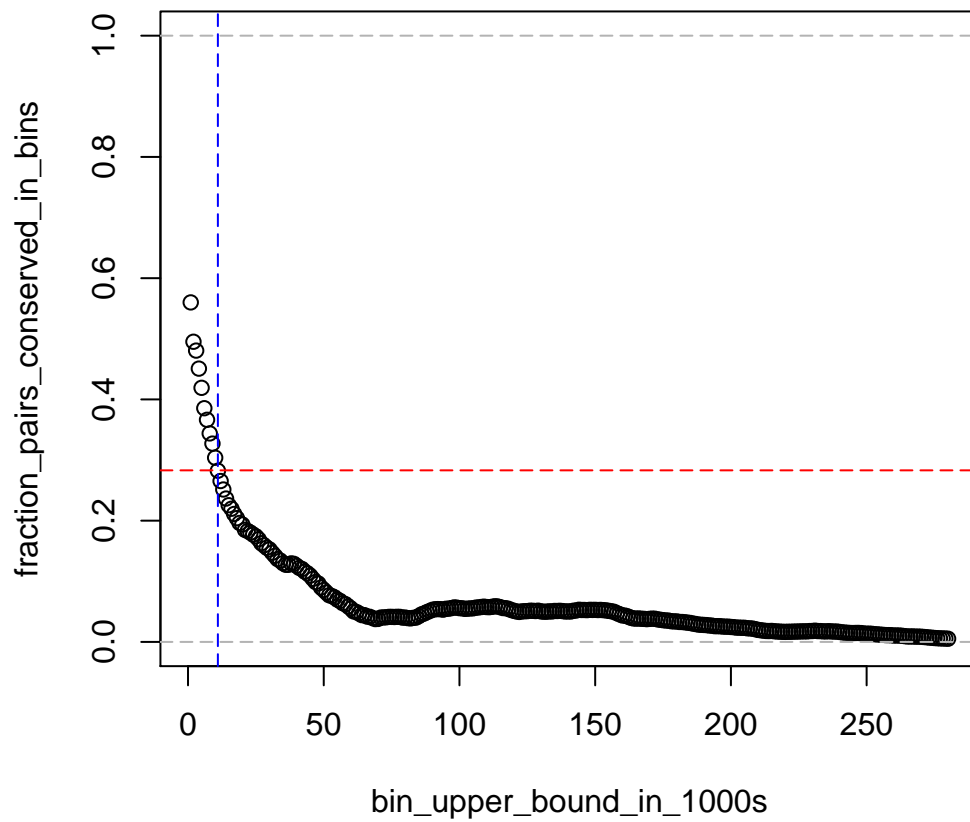

**Bin\_conservation\_minus\_bg\_CVG-1\_vs\_WI0606**  
**PD-0.465861**

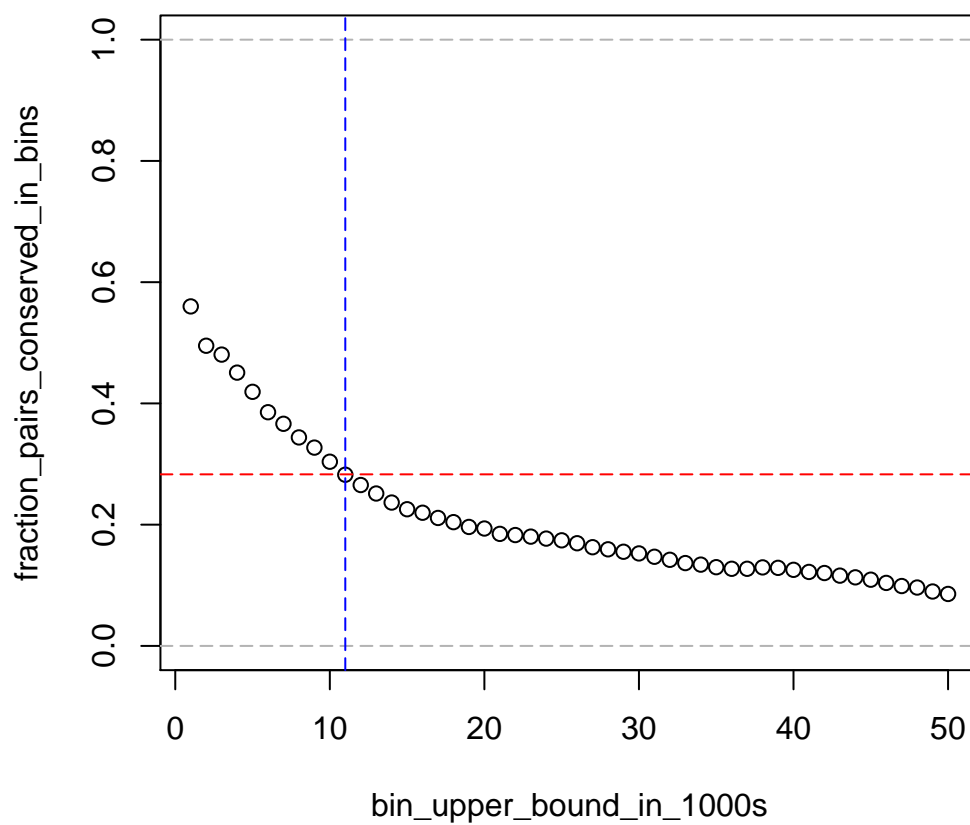

Supplement: s1 [file s1]

**Bin\_conservation\_minus\_bg\_CVG-1\_vs\_NE-JV-3**  
**PD-0.462426**

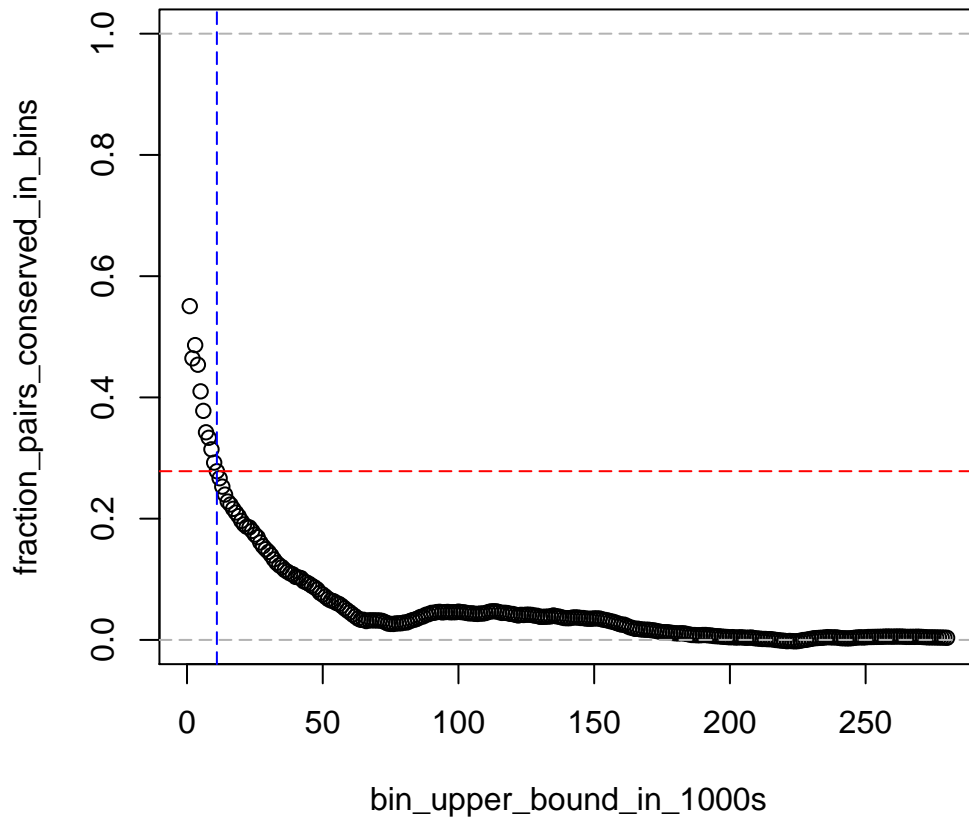

**Bin\_conservation\_minus\_bg\_CVG-1\_vs\_NE-JV-3**  
**PD-0.462426**

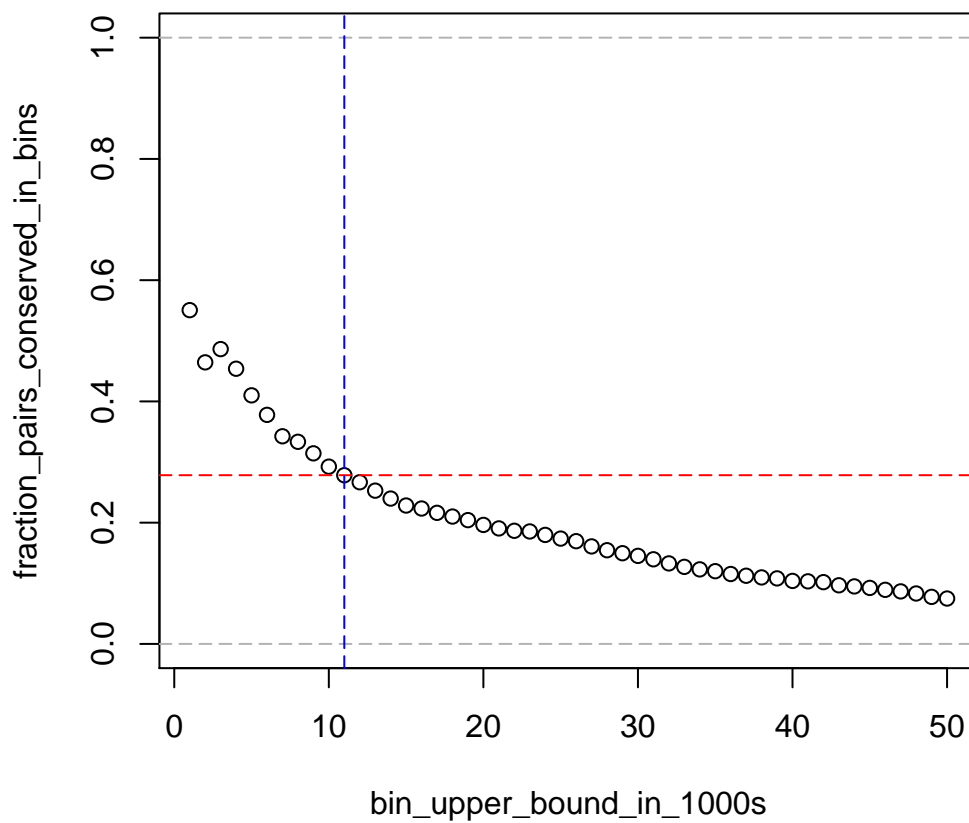

Supplement: s1 [file s1]

**Bin\_conservation\_minus\_bg\_CviKI\_vs\_OR0704.2.2**  
**PD-0.650865**

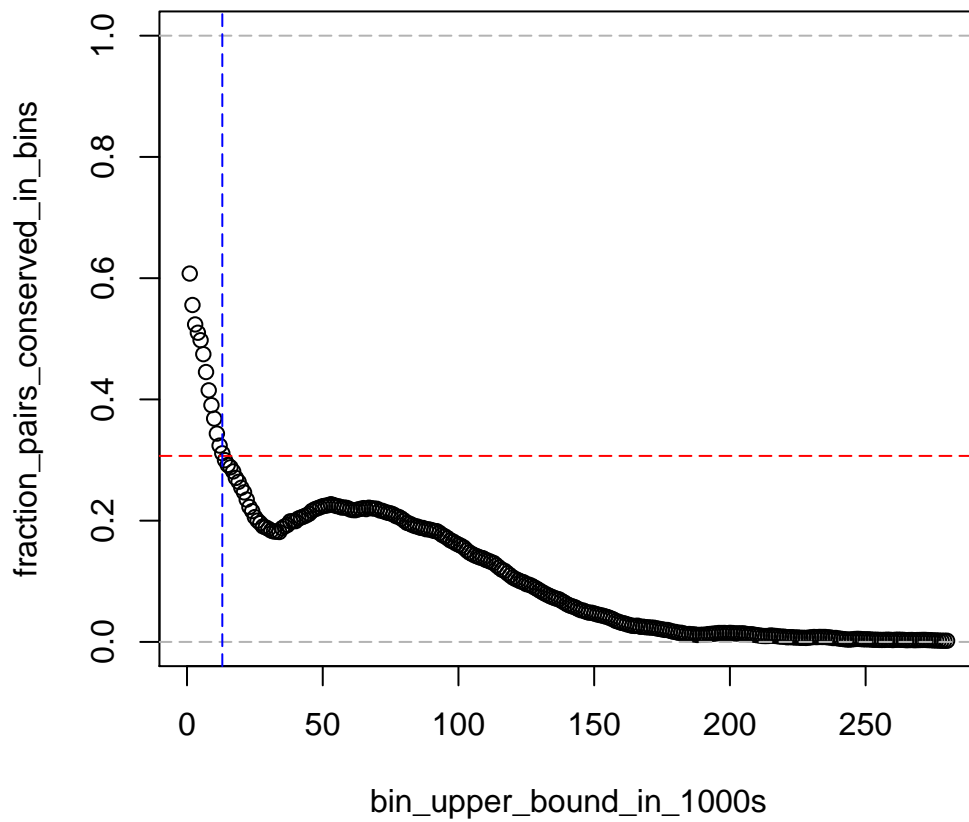

**Bin\_conservation\_minus\_bg\_CviKI\_vs\_OR0704.2.2**  
**PD-0.650865**

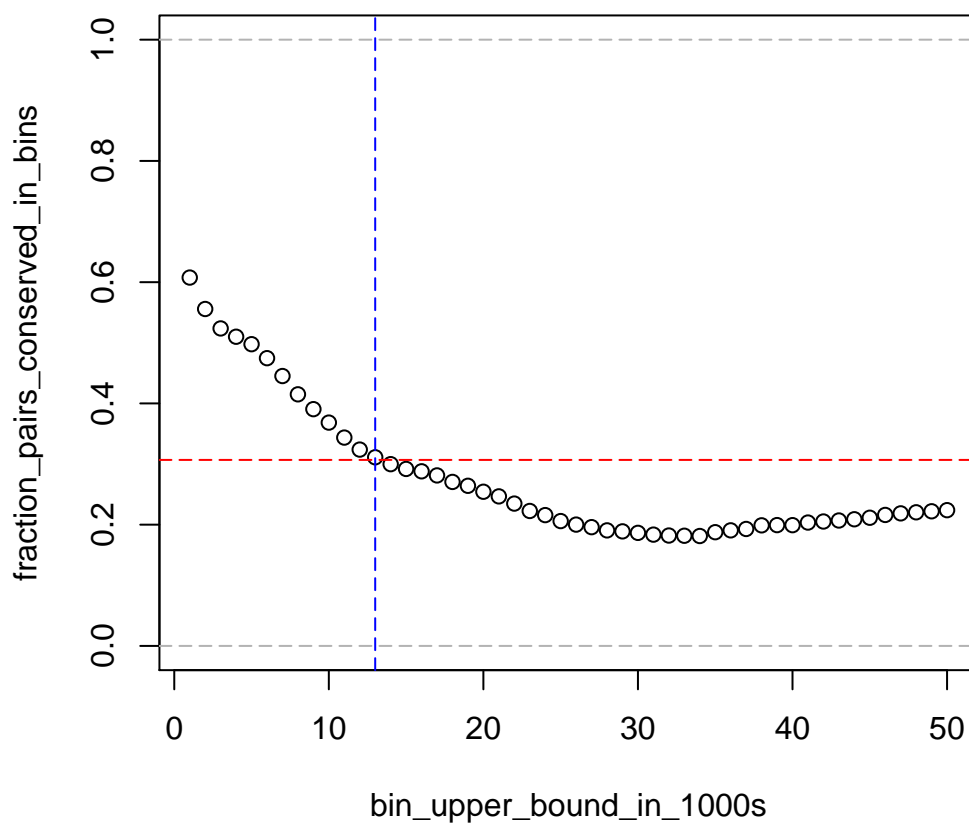

Supplement: s1 [file s1]

**Bin\_conservation\_minus\_bg\_Fr5L\_vs\_NY-2B**  
**PD-0.662483**

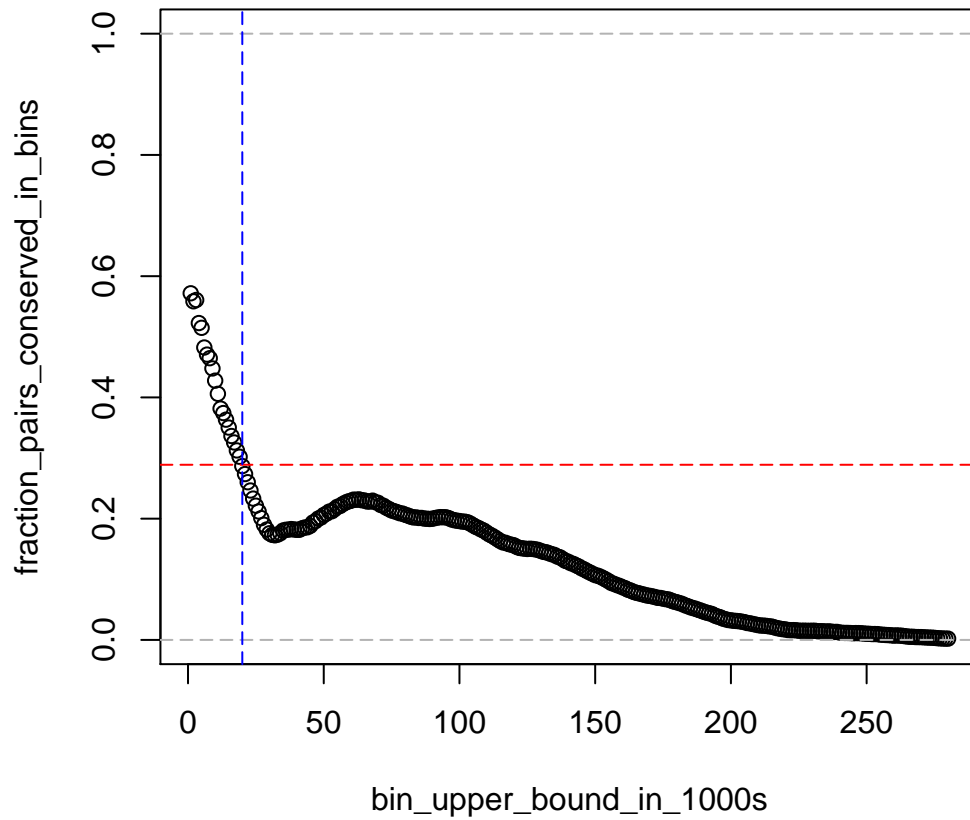

**Bin\_conservation\_minus\_bg\_Fr5L\_vs\_NY-2B**  
**PD-0.662483**

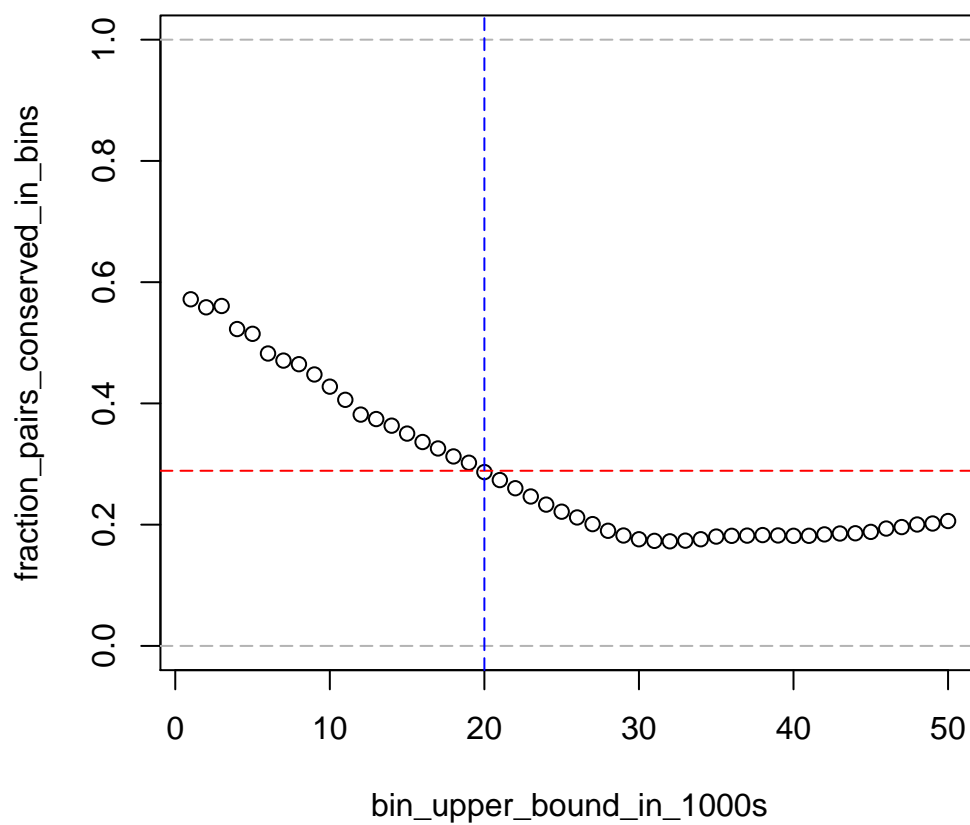

Supplement: s1 [file s1]

**Bin\_conservation\_minus\_bg\_CVA-1\_vs\_NE-JV-3**  
**PD-0.458195**

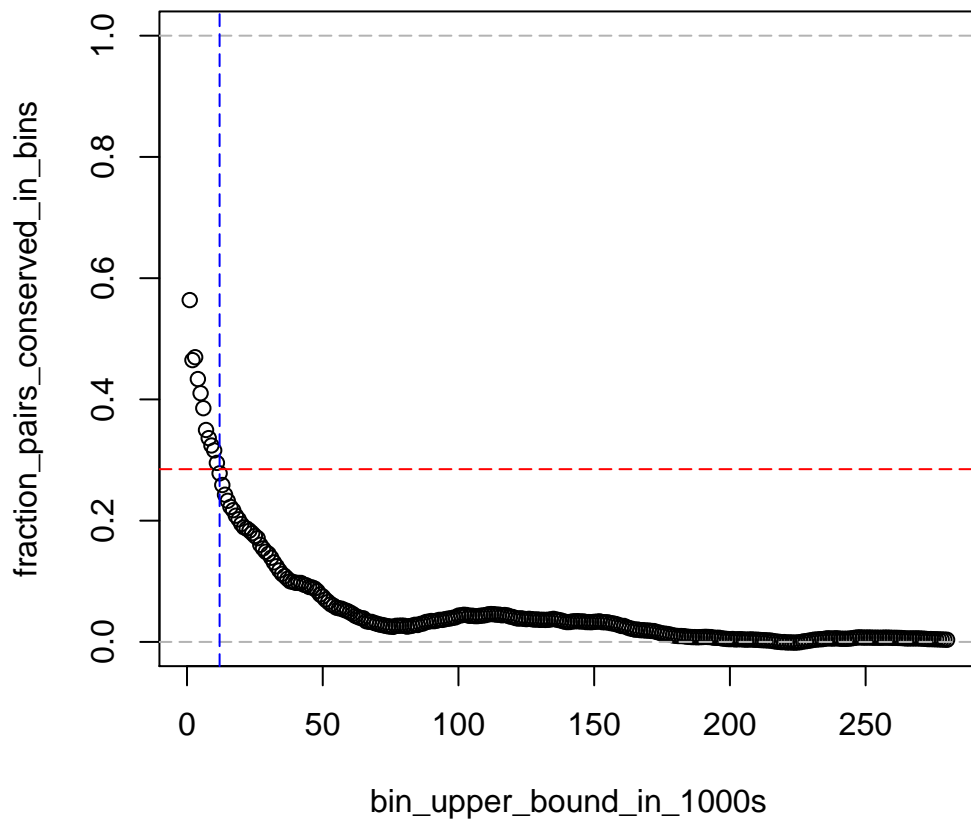

**Bin\_conservation\_minus\_bg\_CVA-1\_vs\_NE-JV-3**  
**PD-0.458195**

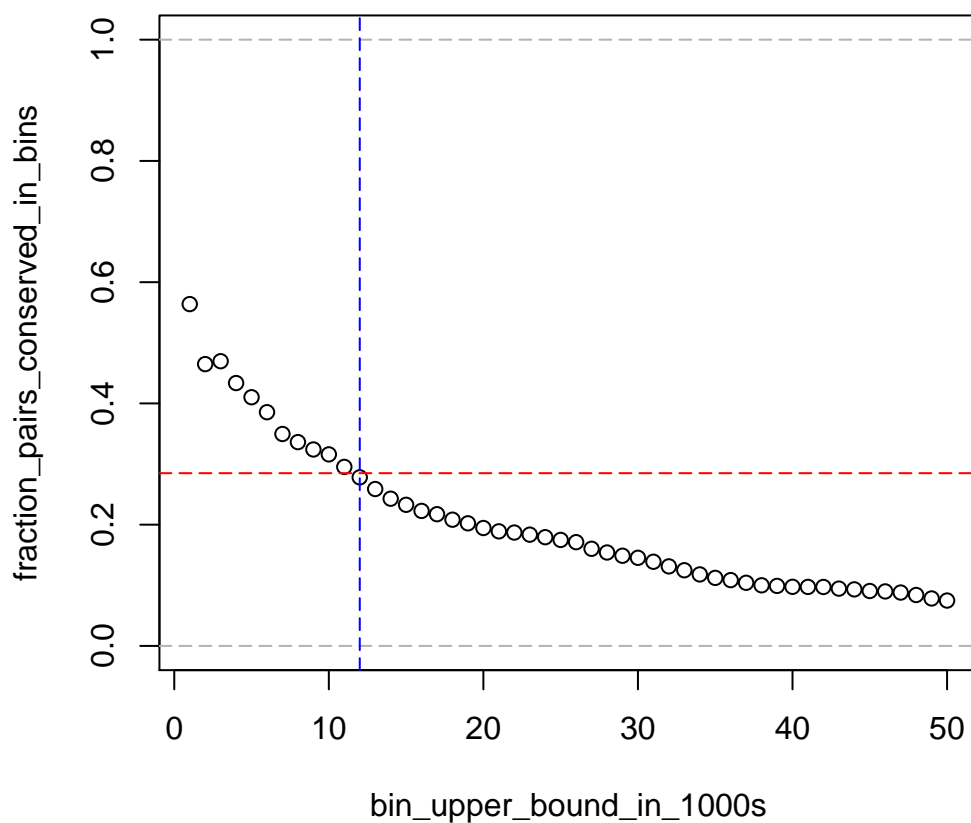

Supplement: s1 [file s1]

**Bin\_conservation\_minus\_bg\_NE-JV-4\_vs\_WI0606**  
**PD-0.685681**

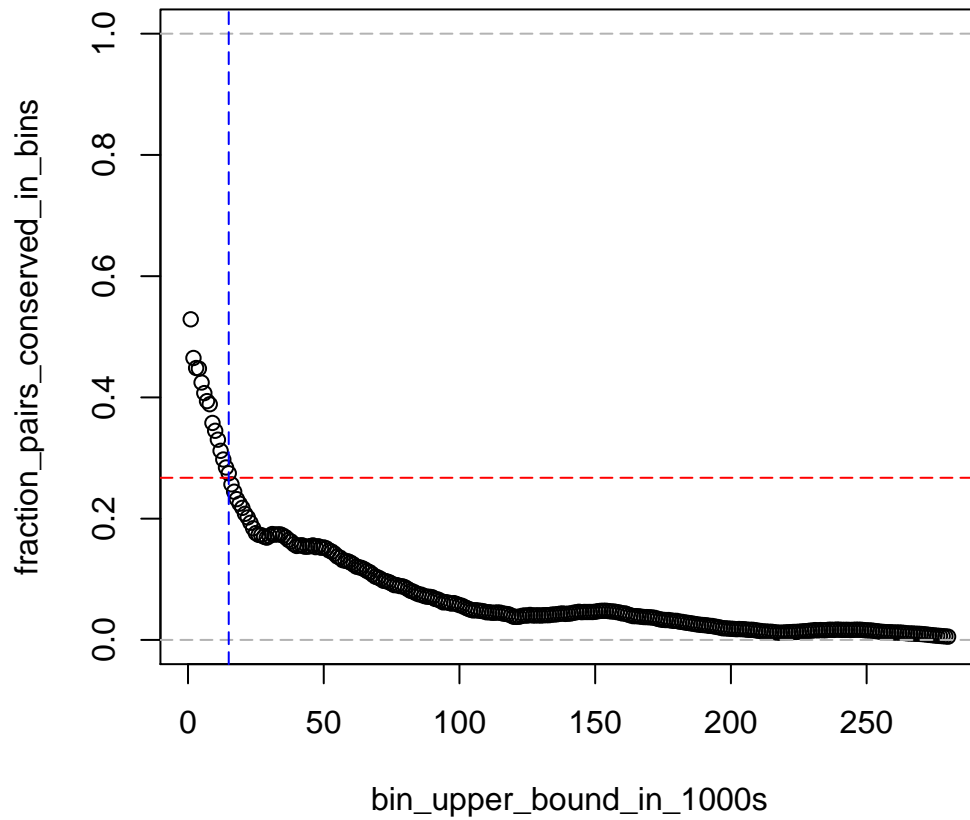

**Bin\_conservation\_minus\_bg\_NE-JV-4\_vs\_WI0606**  
**PD-0.685681**

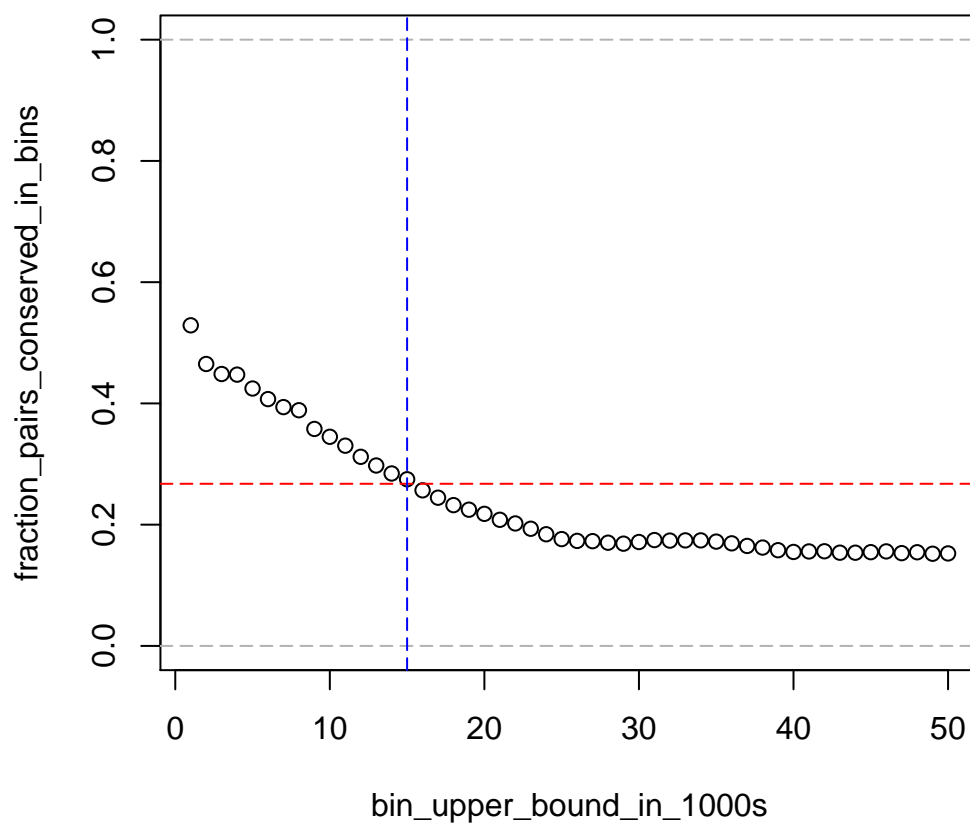

Supplement: s1 [file s1]

**Bin\_conservation\_minus\_bg\_CVG-1\_vs\_MA-1E**  
**PD-0.654424**

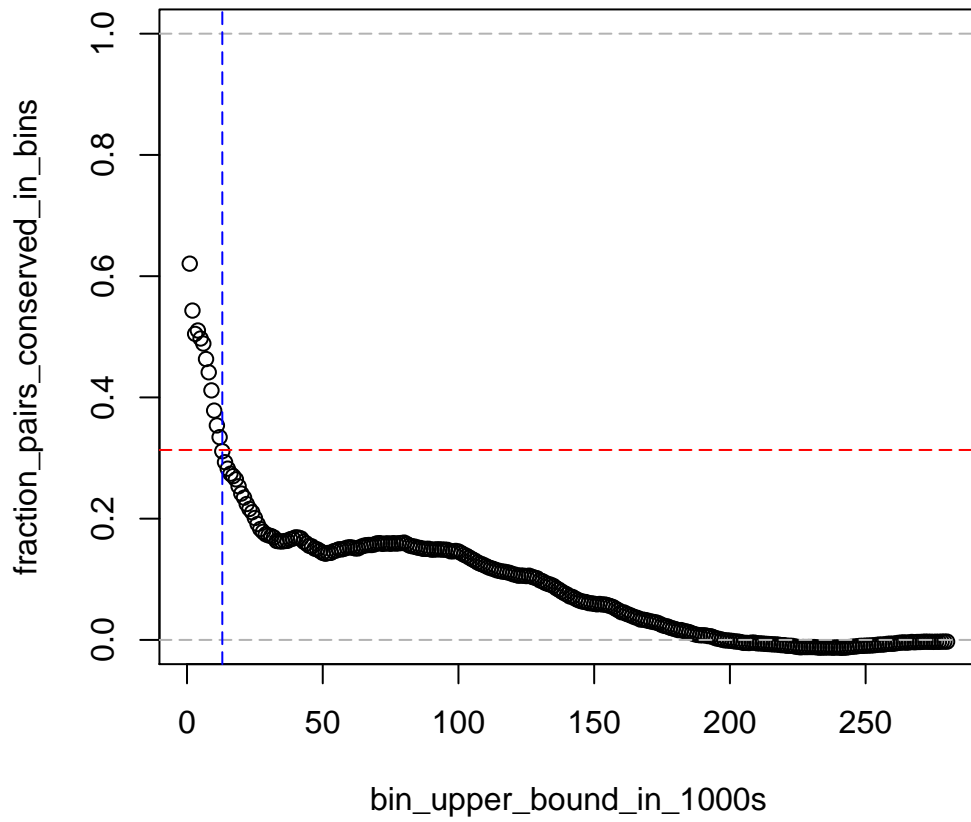

**Bin\_conservation\_minus\_bg\_CVG-1\_vs\_MA-1E**  
**PD-0.654424**

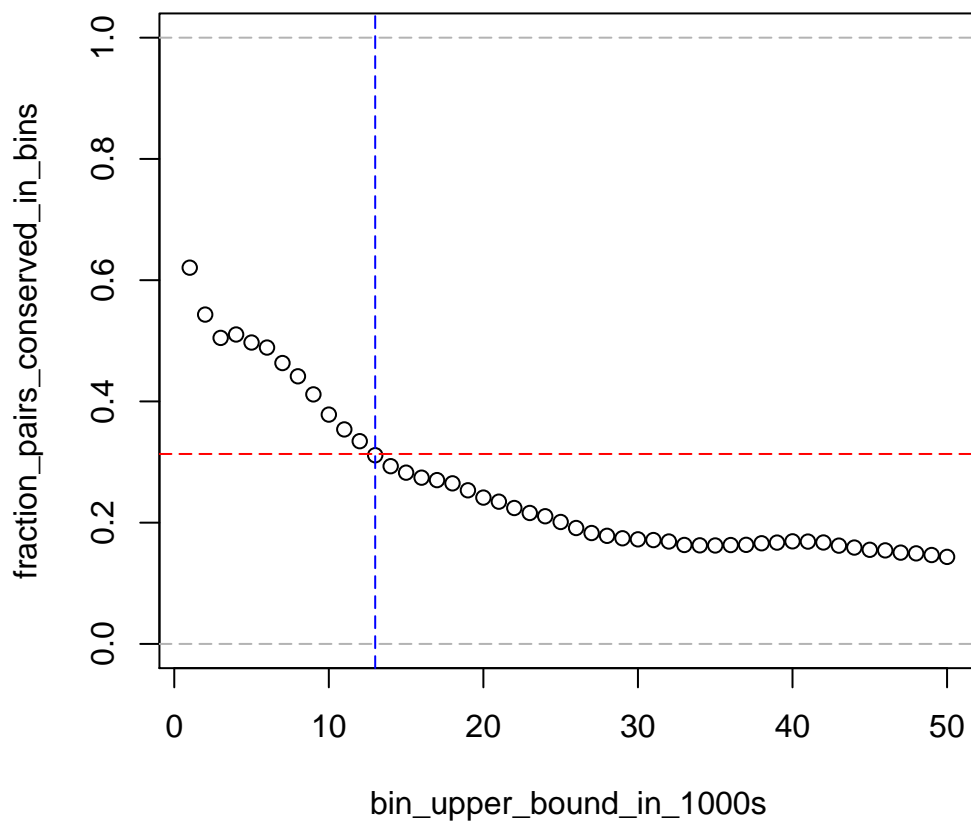

Supplement: s1 [file s1]

**Bin\_conservation\_minus\_bg\_CVG-1\_vs\_IL-5-2s1**  
**PD-0.663114**

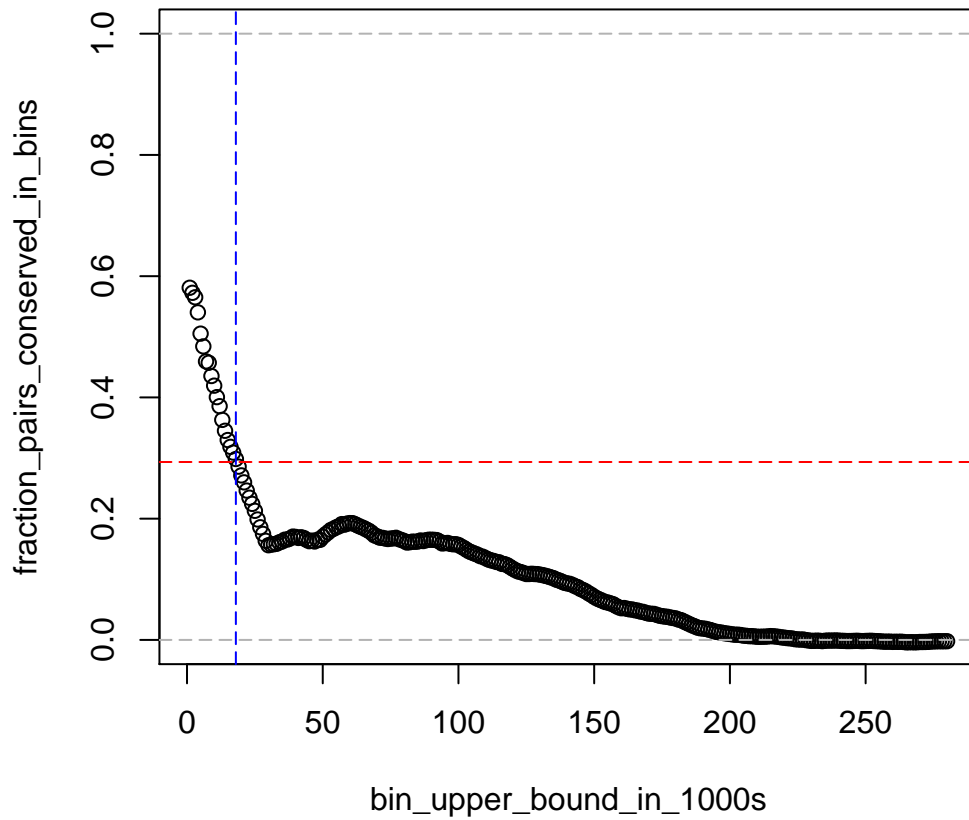

**Bin\_conservation\_minus\_bg\_CVG-1\_vs\_IL-5-2s1**  
**PD-0.663114**

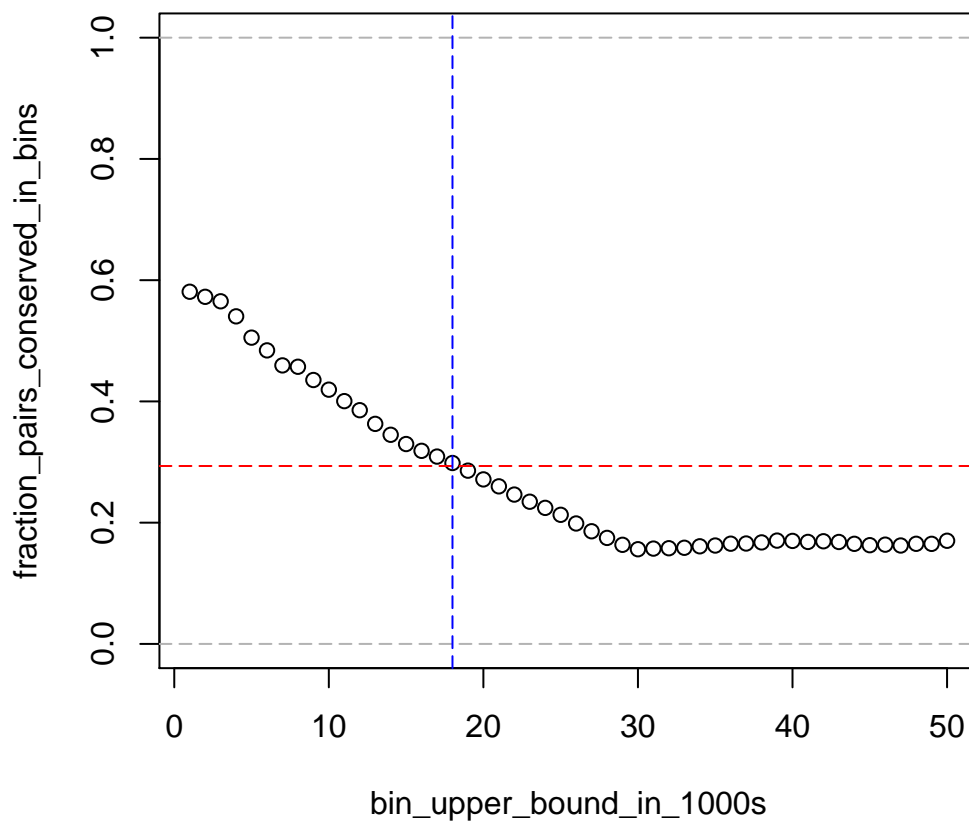

Supplement: s1 [file s1]

**Bin\_conservation\_minus\_bg\_Can18-4\_vs\_PBCV1**  
**PD-0.644432**

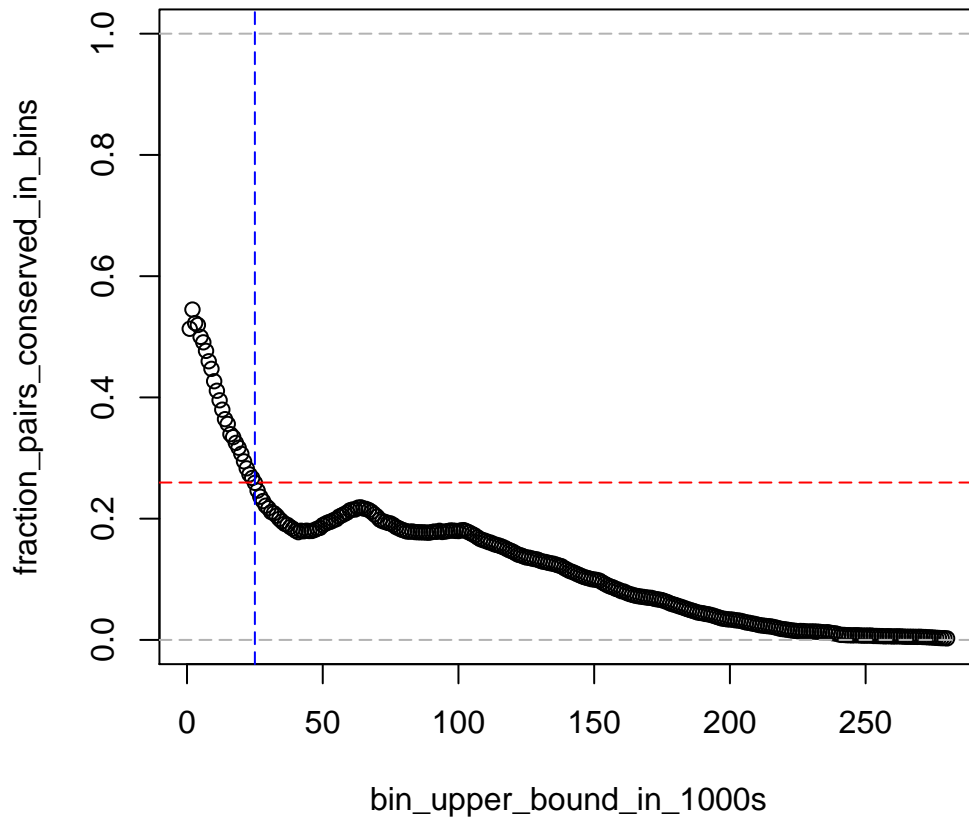

**Bin\_conservation\_minus\_bg\_Can18-4\_vs\_PBCV1**  
**PD-0.644432**

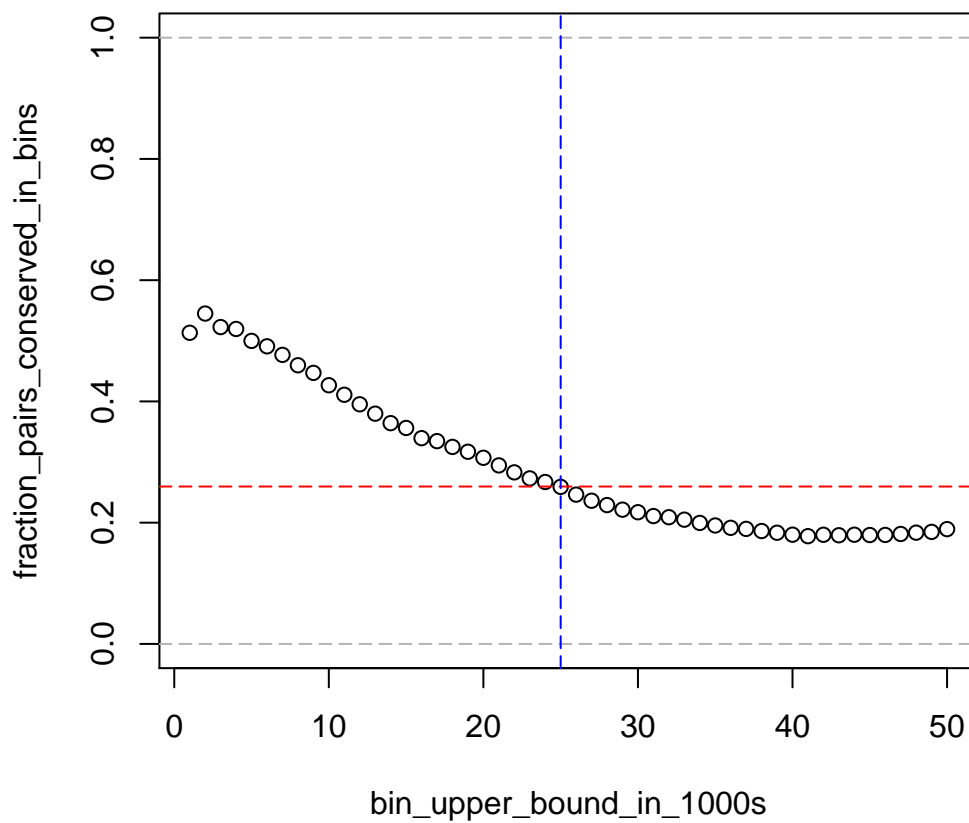

Supplement: s1 [file s1]

**Bin\_conservation\_minus\_bg\_MA-1D\_vs\_NY-2B**  
**PD-0.009662**

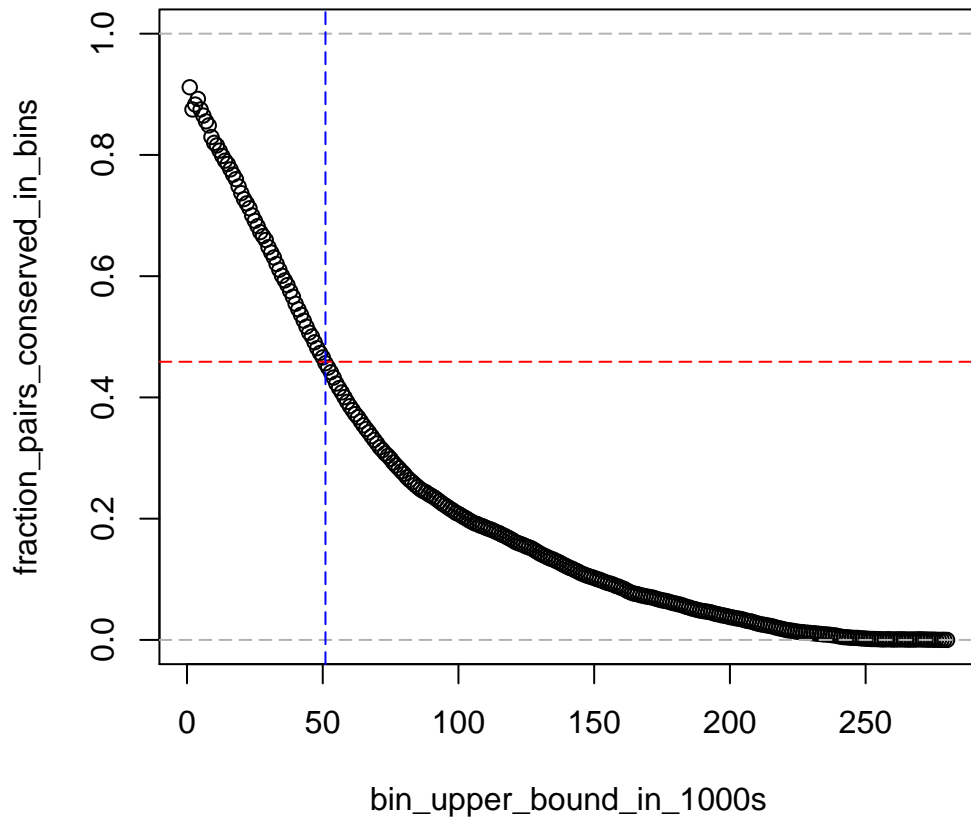

**Bin\_conservation\_minus\_bg\_MA-1D\_vs\_NY-2B**  
**PD-0.009662**

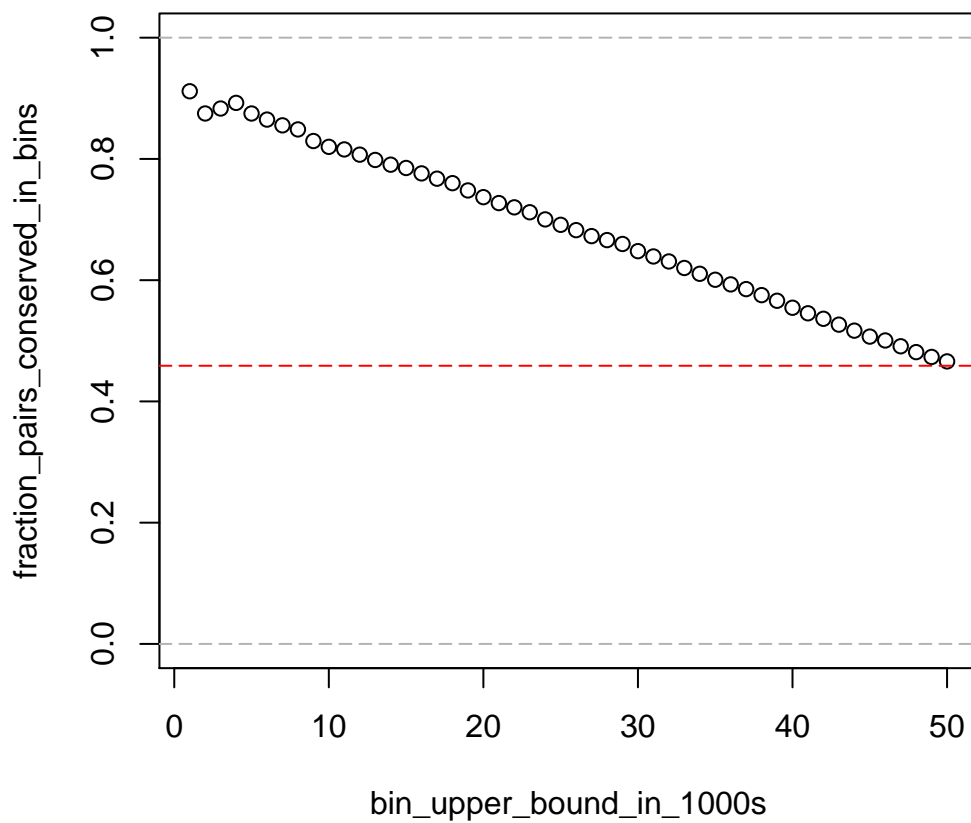

Supplement: s1 [file s1]

**Bin\_conservation\_minus\_bg\_Can0610SP\_vs\_NY2A**  
**PD-0.710153**

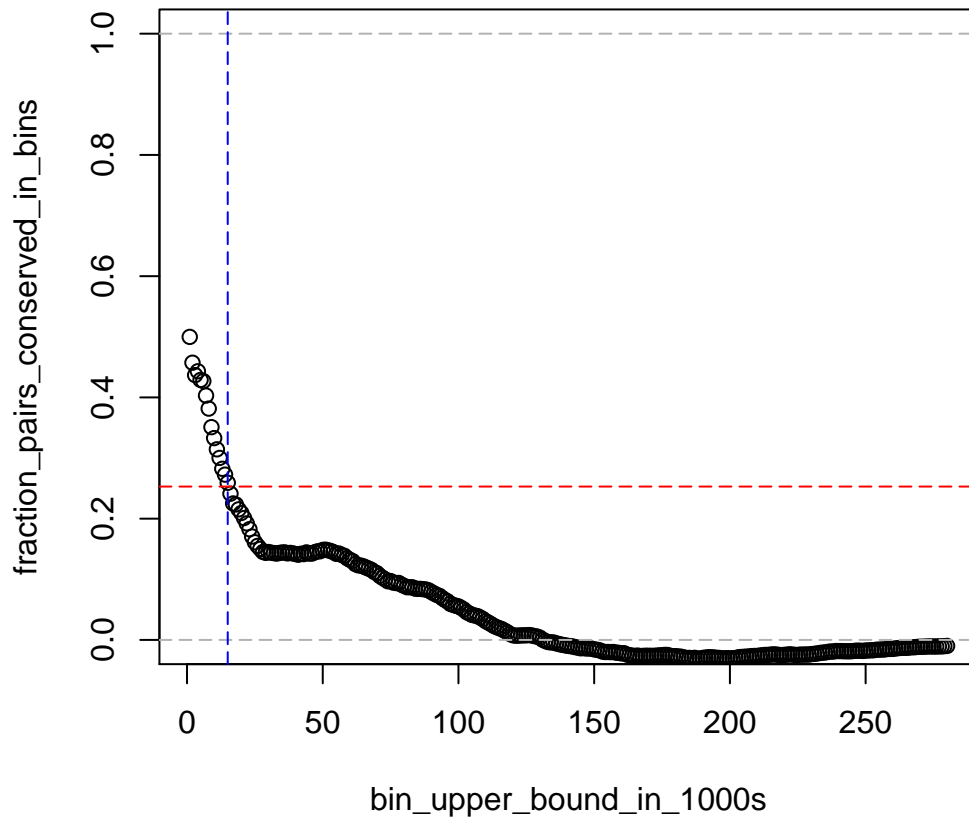

**Bin\_conservation\_minus\_bg\_Can0610SP\_vs\_NY2A**  
**PD-0.710153**

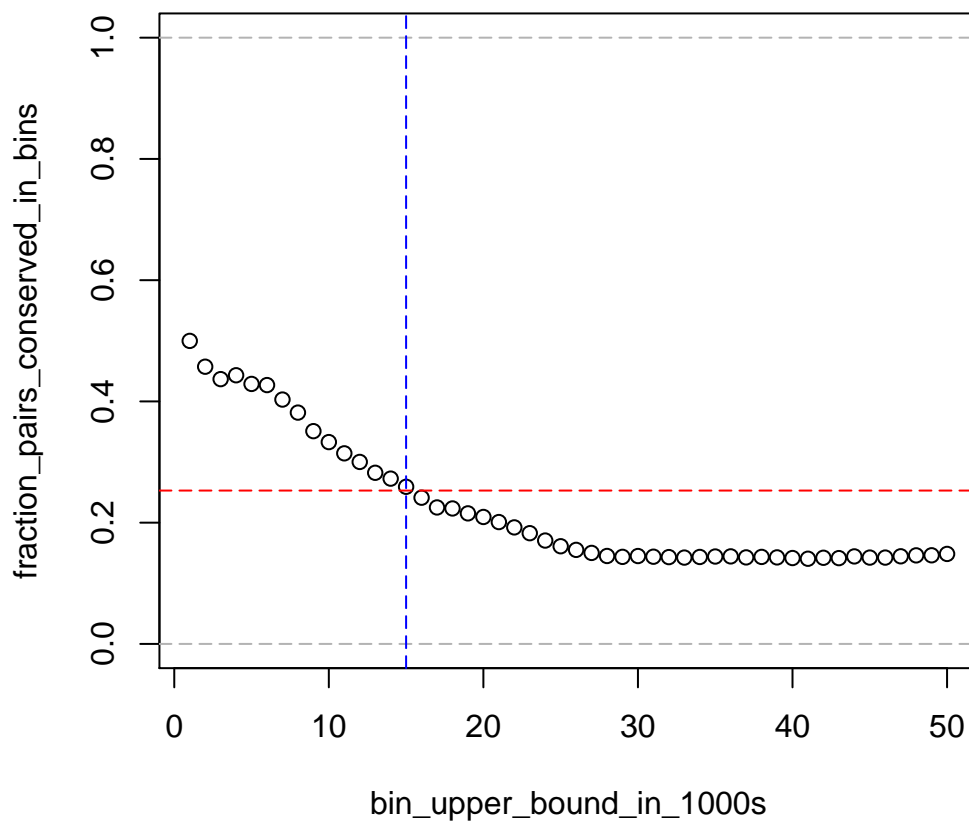

Supplement: s1 [file s1]

**Bin\_conservation\_minus\_bg\_AN69C\_vs\_CVB-1**  
**PD-0.651998**

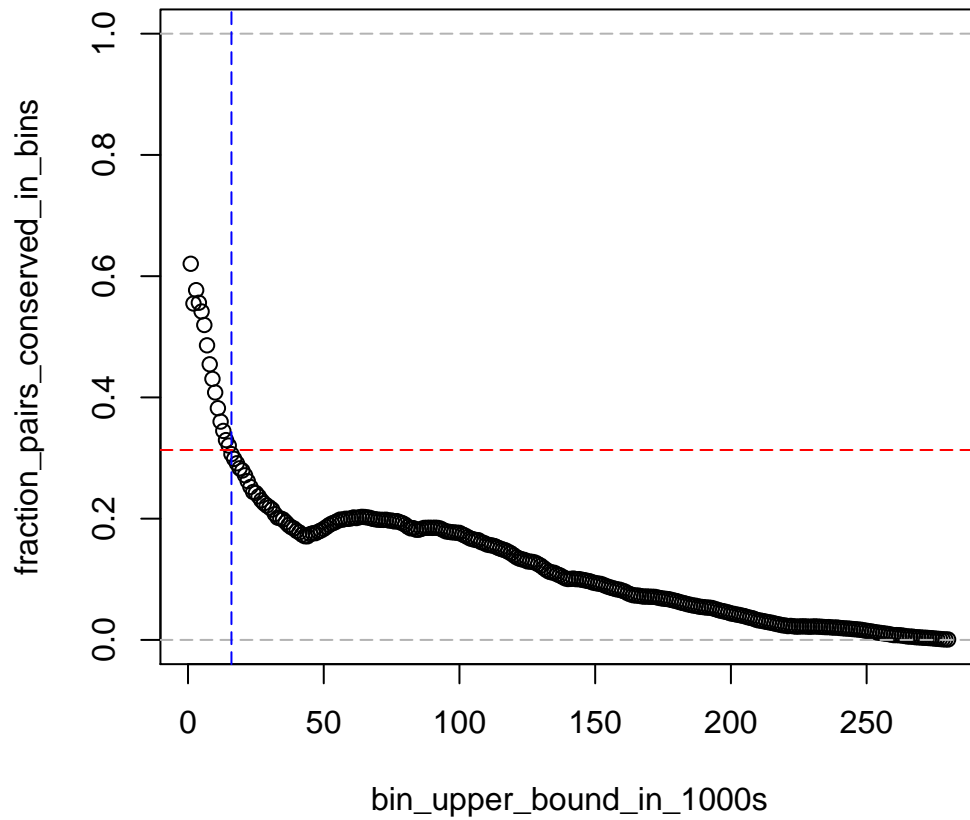

**Bin\_conservation\_minus\_bg\_AN69C\_vs\_CVB-1**  
**PD-0.651998**

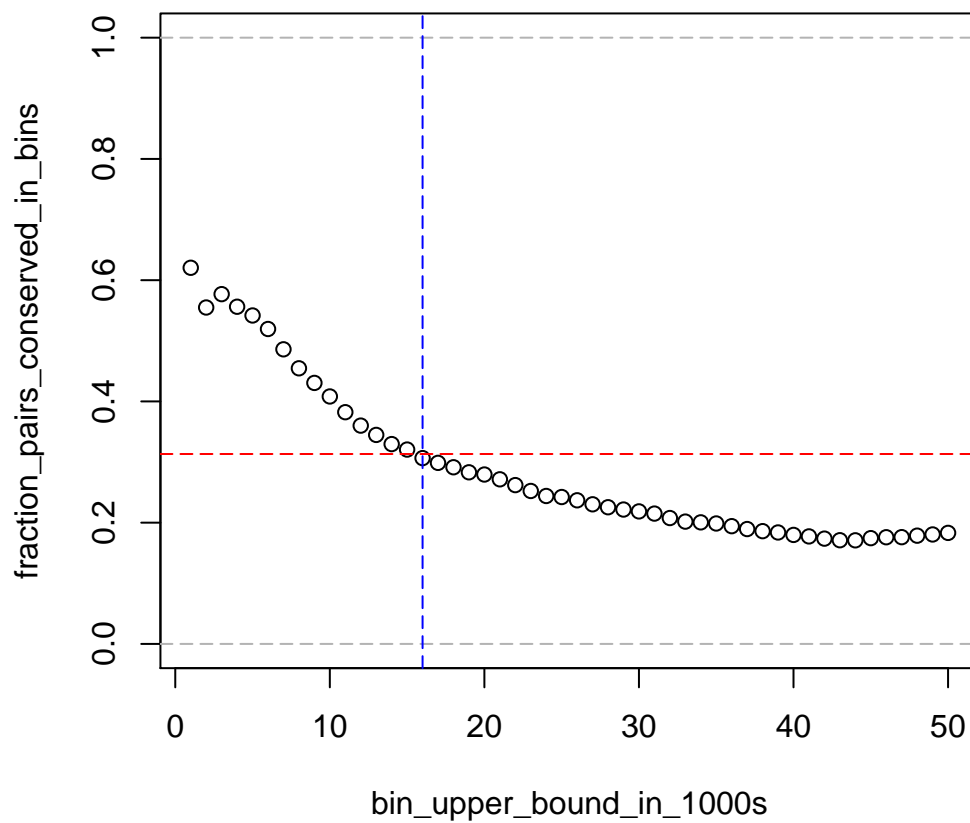

Supplement: s1 [file s1]

**Bin\_conservation\_minus\_bg\_Can18-4\_vs\_MO0605SPH**  
**PD-0.473282**

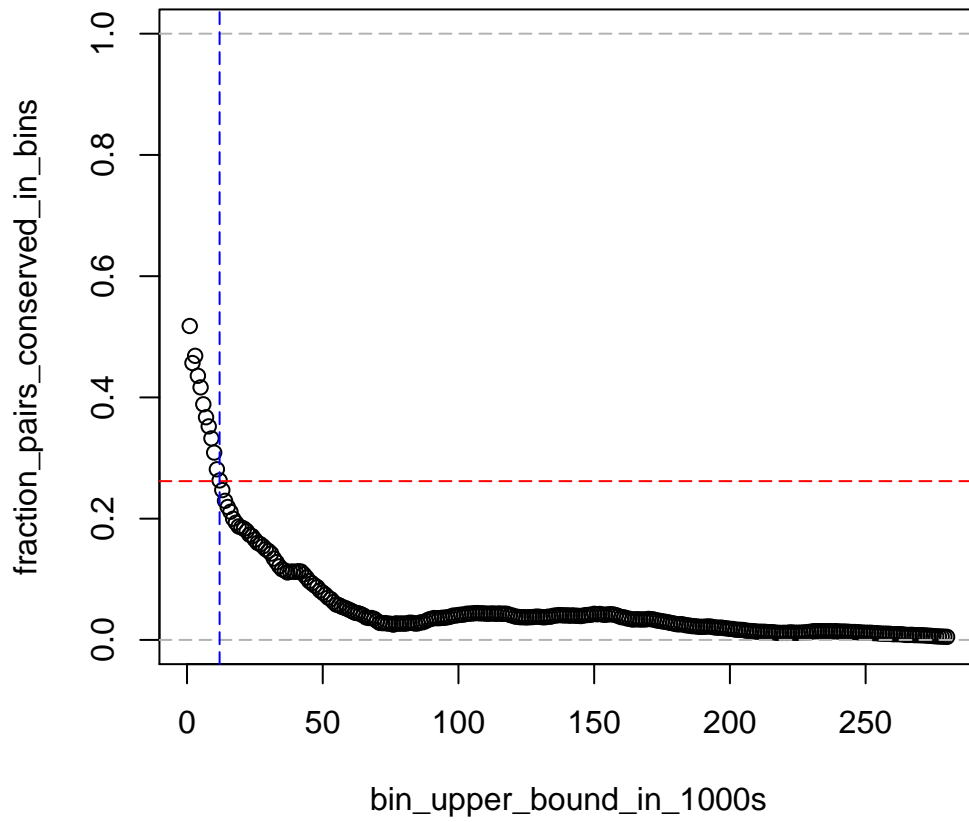

**Bin\_conservation\_minus\_bg\_Can18-4\_vs\_MO0605SPH**  
**PD-0.473282**

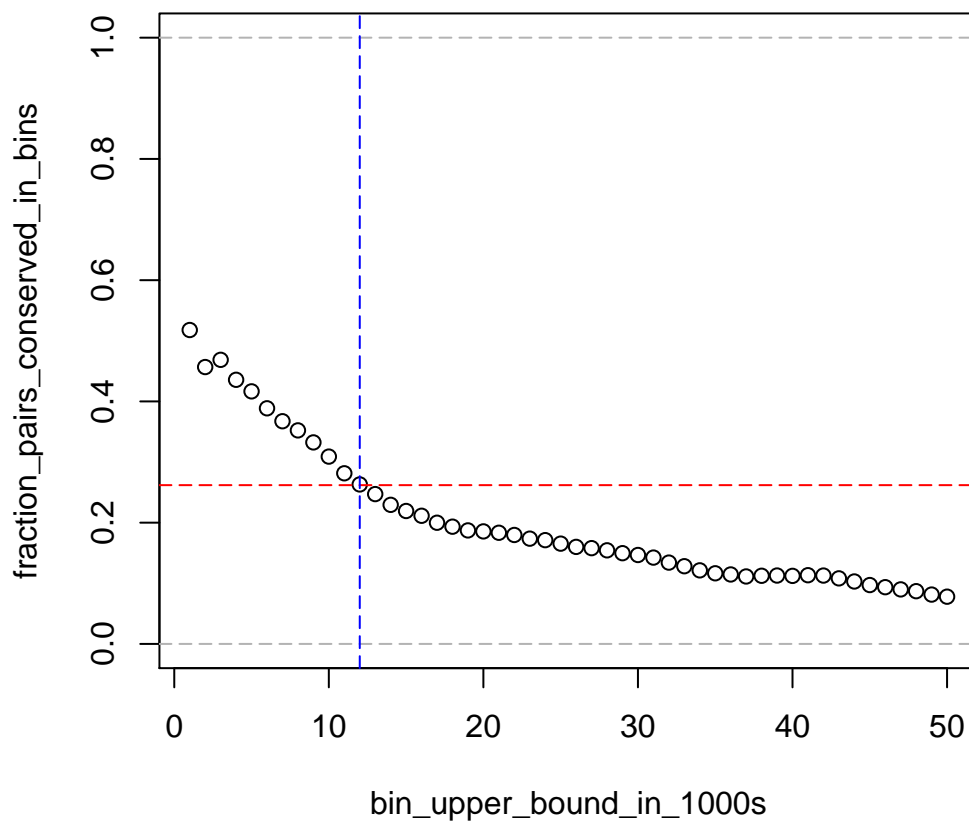

Supplement: s1 [file s1]

**Bin\_conservation\_minus\_bg\_AN69C\_vs\_IL-3A**  
**PD-0.004131**

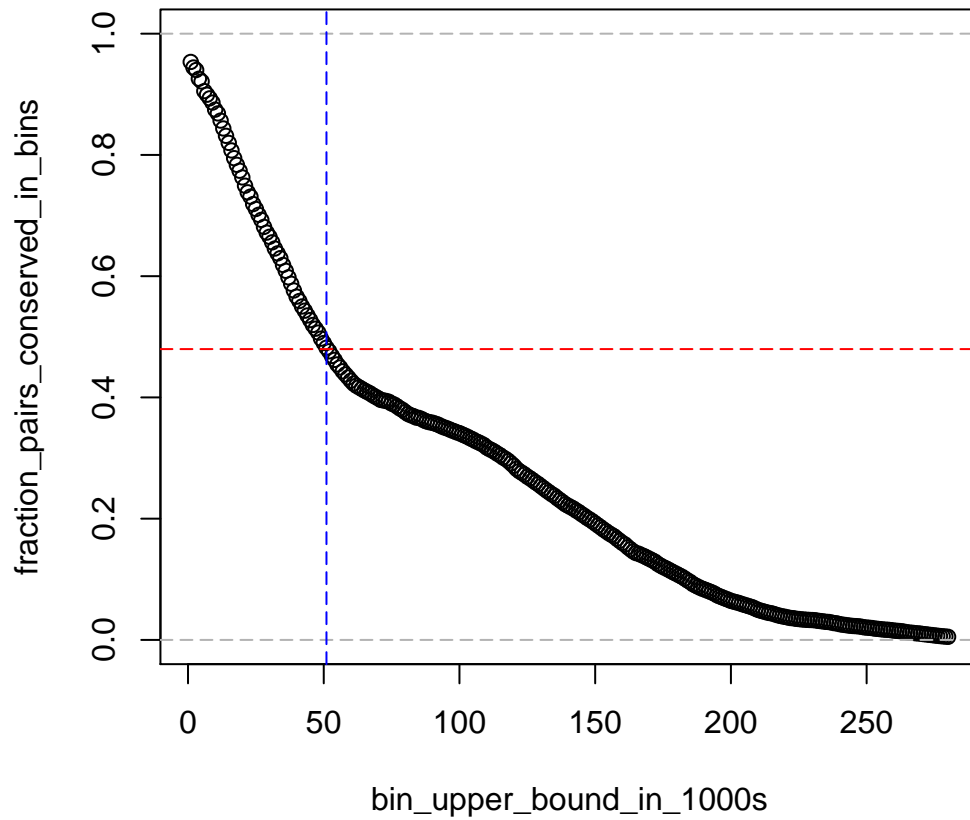

**Bin\_conservation\_minus\_bg\_AN69C\_vs\_IL-3A**  
**PD-0.004131**

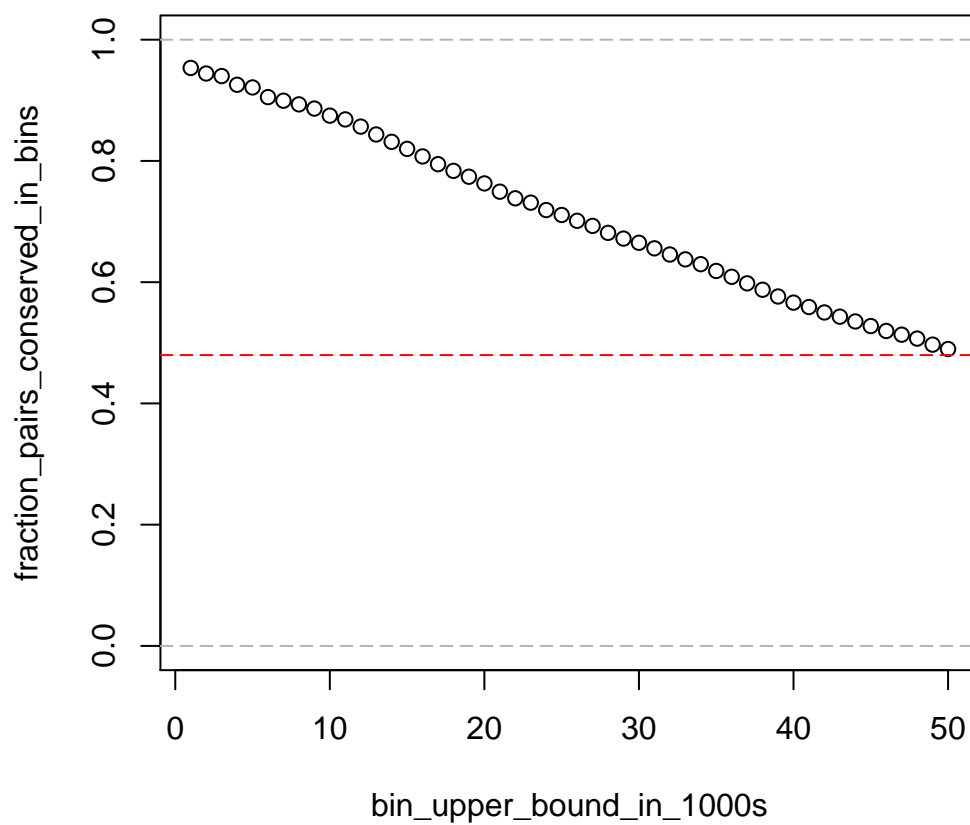

Supplement: s1 [file s1]

**Bin\_conservation\_minus\_bg\_Can18-4\_vs\_MA-1E**  
**PD-0.662353**

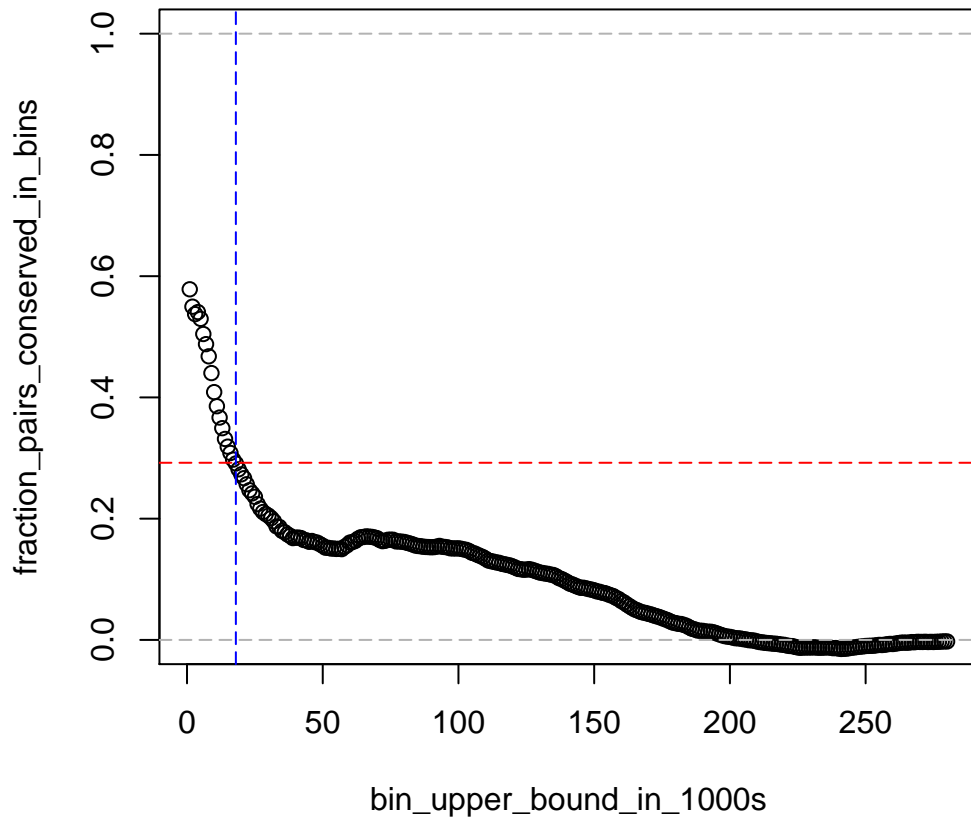

**Bin\_conservation\_minus\_bg\_Can18-4\_vs\_MA-1E**  
**PD-0.662353**

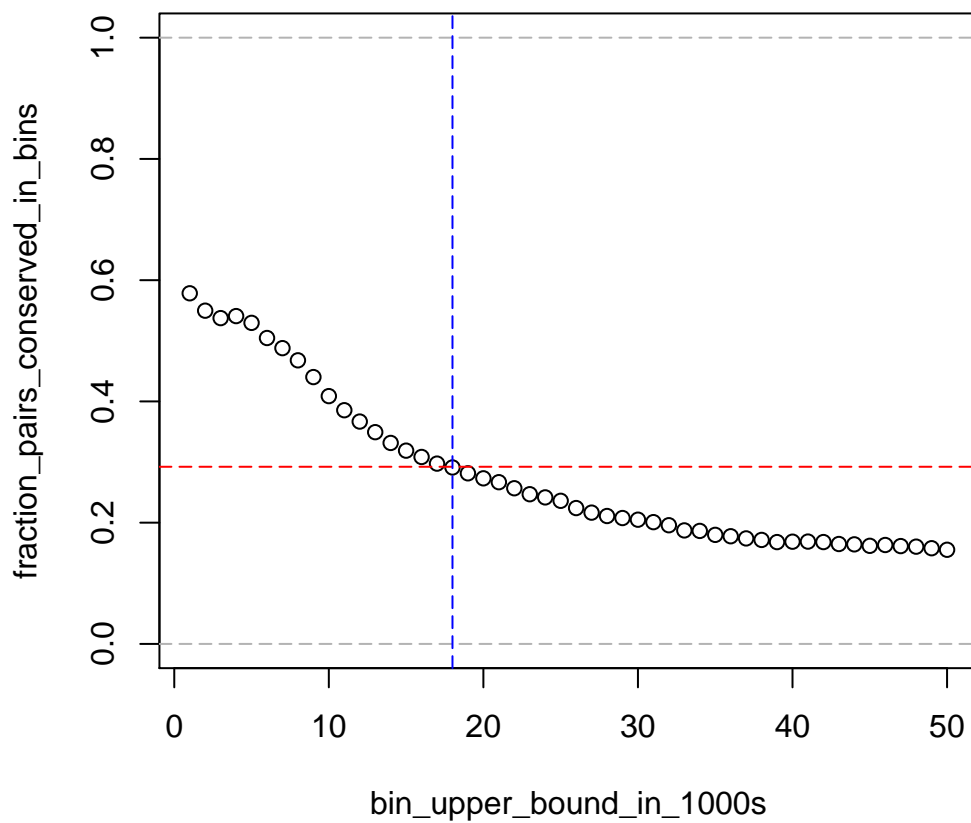

Supplement: s1 [file s1]

**Bin\_conservation\_minus\_bg\_CVR-1\_vs\_OR0704.3**  
**PD-0.457863**

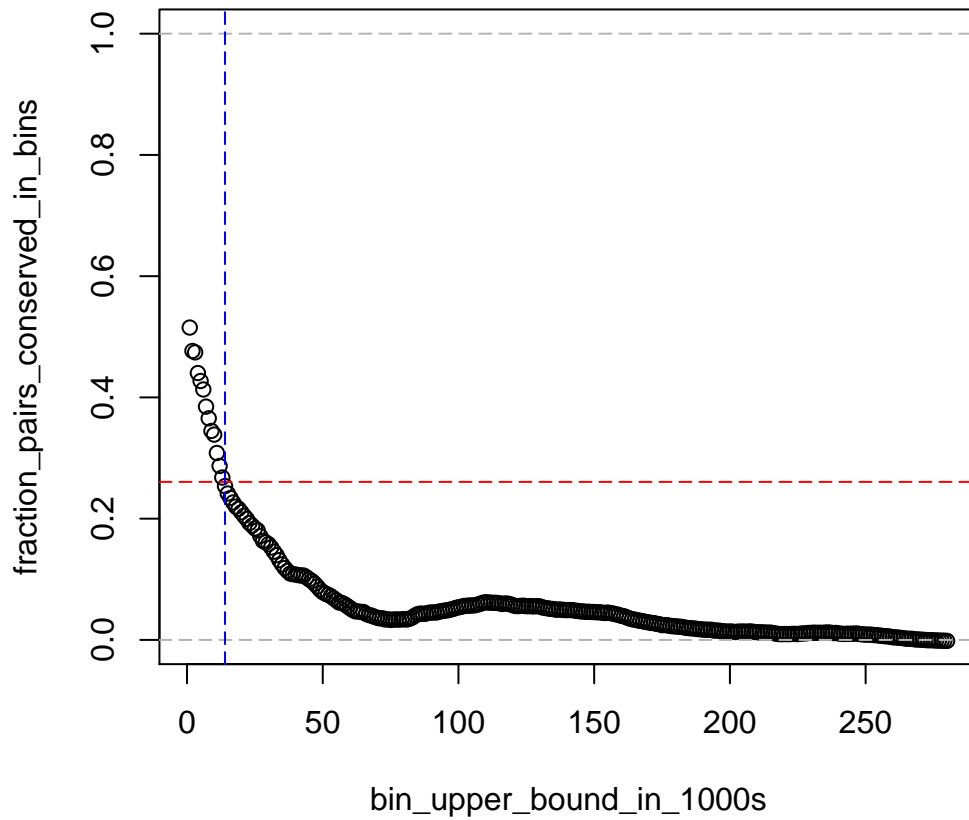

**Bin\_conservation\_minus\_bg\_CVR-1\_vs\_OR0704.3**  
**PD-0.457863**

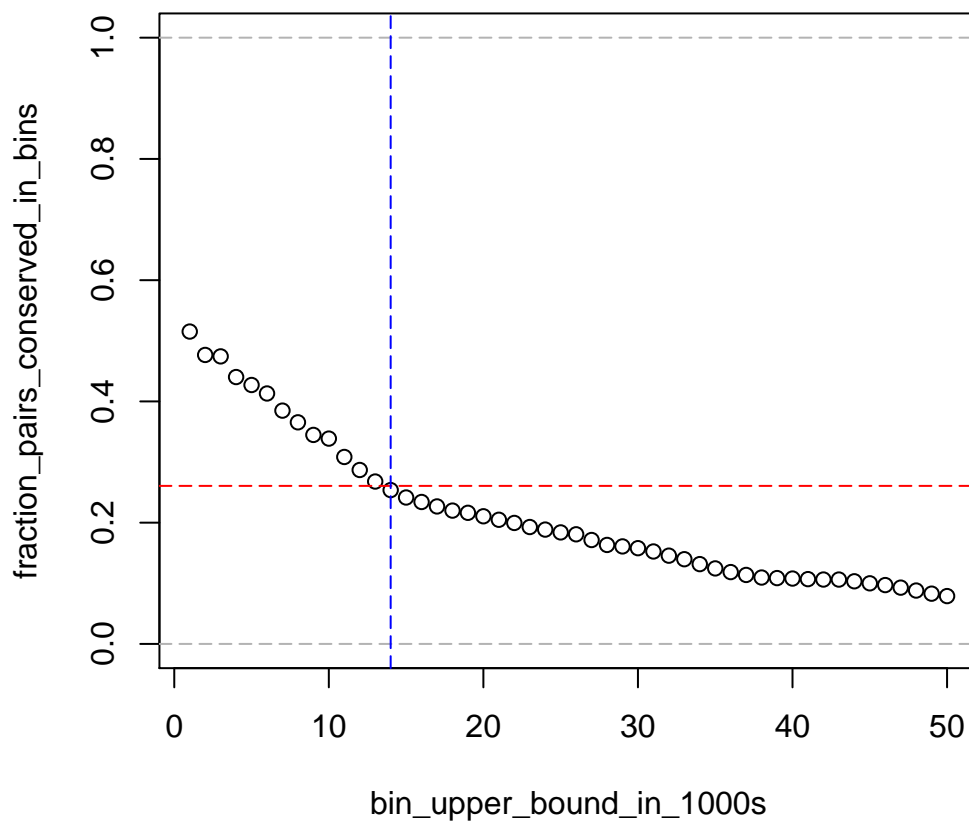

Supplement: s1 [file s1]

**Bin\_conservation\_minus\_bg\_MO0605SPH\_vs\_NW665.2**  
**PD-0.466741**

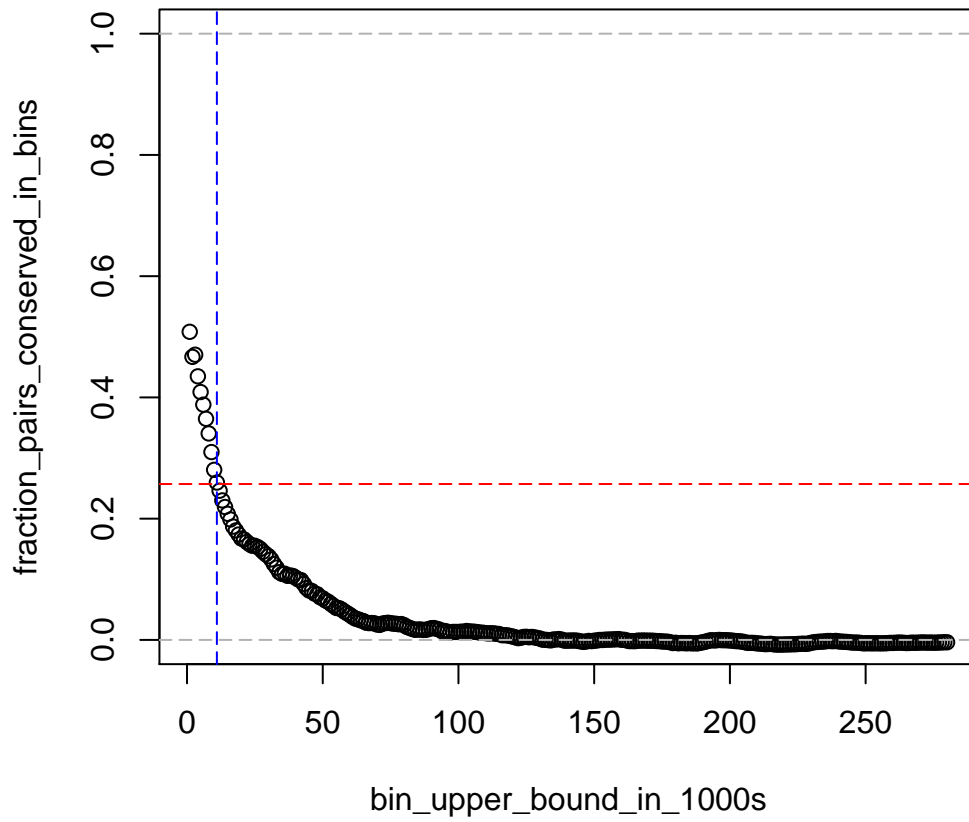

**Bin\_conservation\_minus\_bg\_MO0605SPH\_vs\_NW665.2**  
**PD-0.466741**

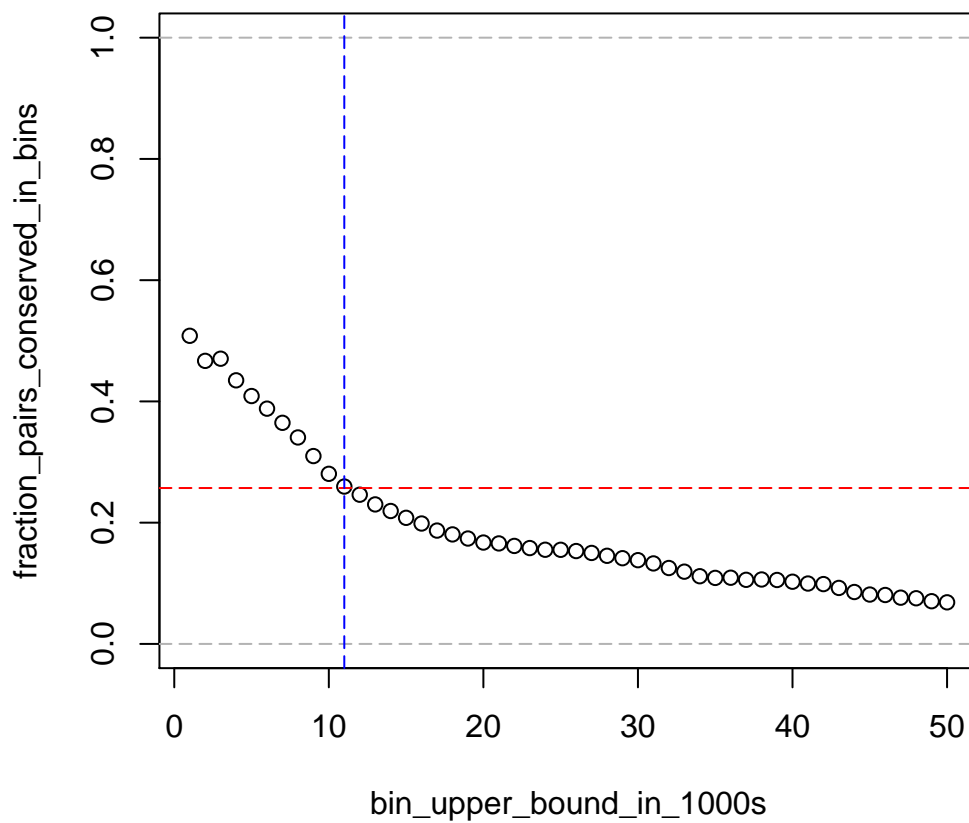

Supplement: s1 [file s1]

**Bin\_conservation\_minus\_bg\_Can18-4\_vs\_CVG-1**  
**PD-0.035527**

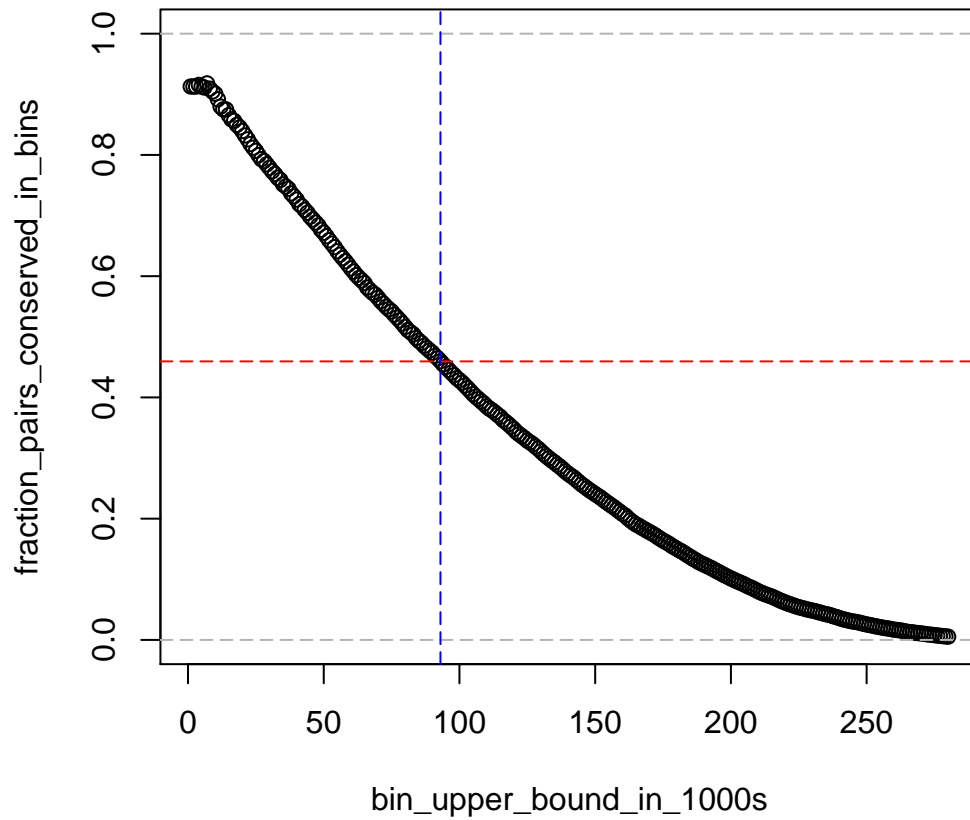

**Bin\_conservation\_minus\_bg\_Can18-4\_vs\_CVG-1**  
**PD-0.035527**

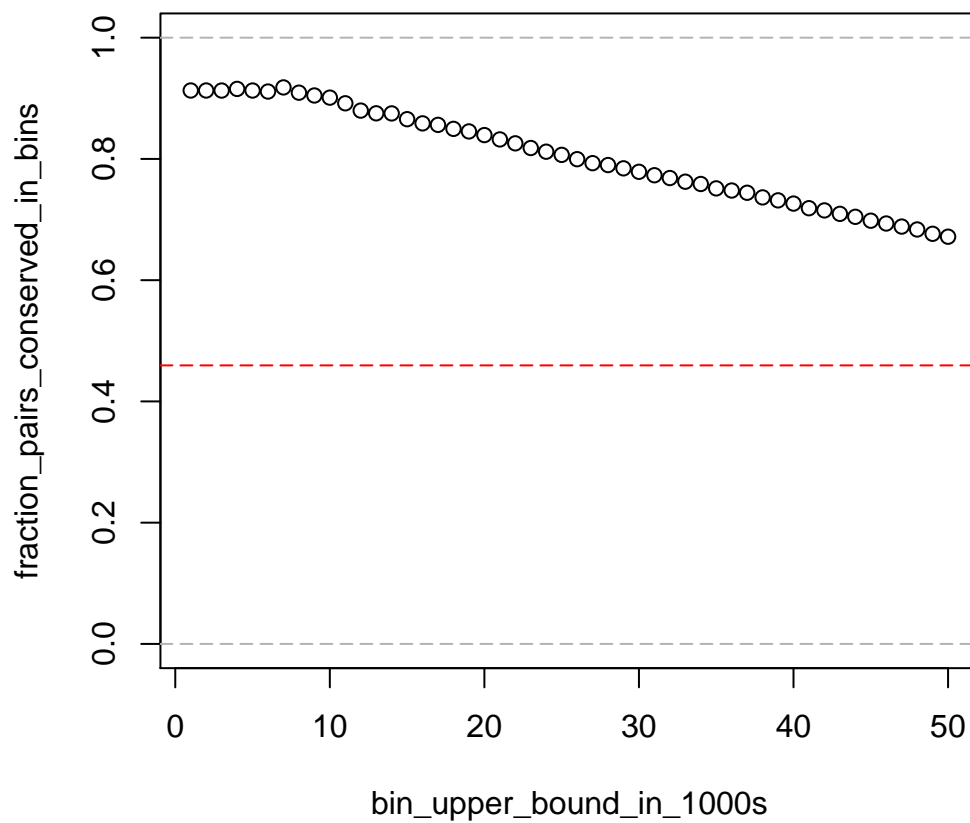

Supplement: s1 [file s1]

**Bin\_conservation\_minus\_bg\_AR158\_vs\_TN603.4.2**  
**PD-0.695069**

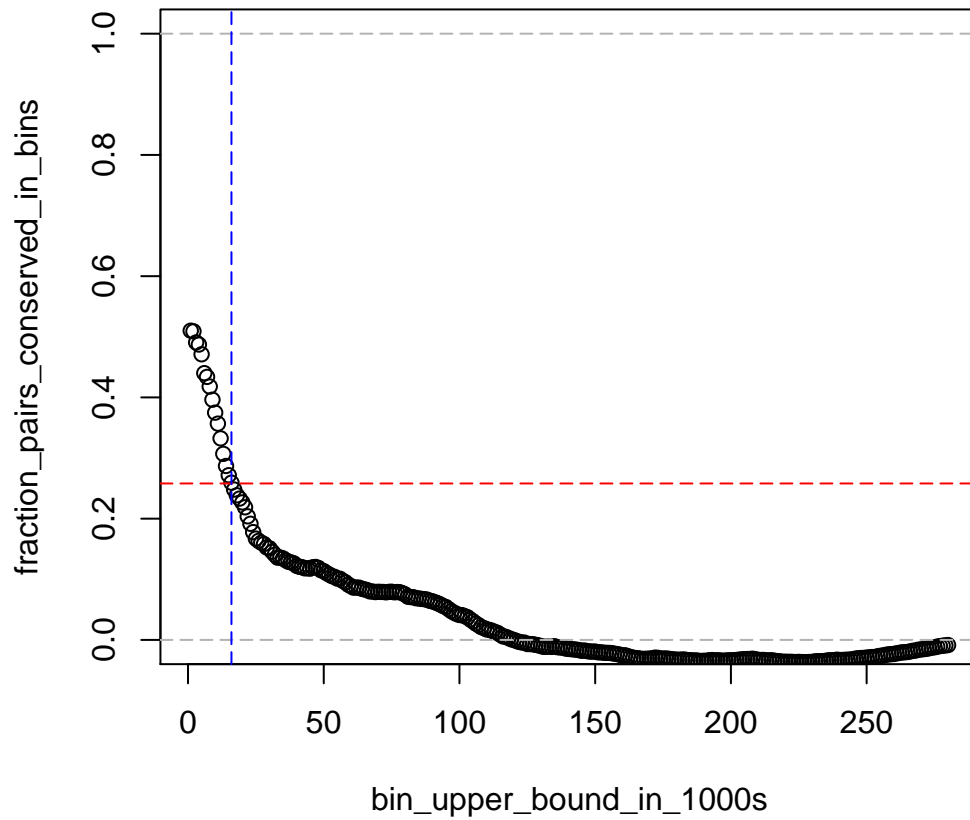

**Bin\_conservation\_minus\_bg\_AR158\_vs\_TN603.4.2**  
**PD-0.695069**

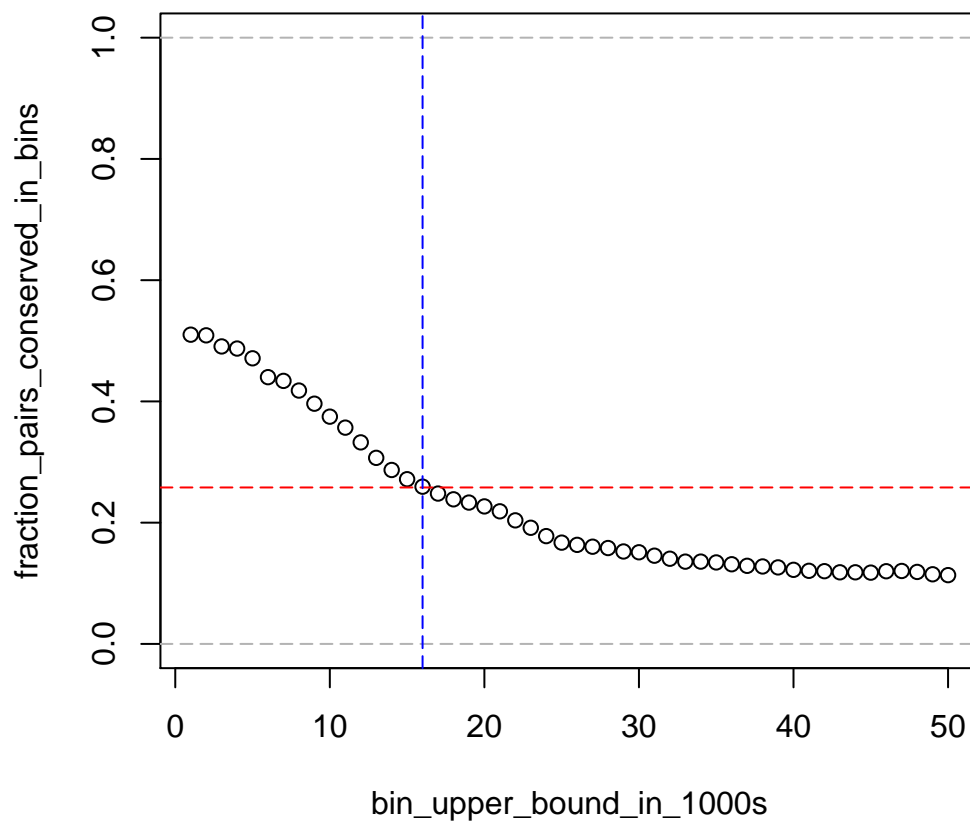

Supplement: s1 [file s1]

**Bin\_conservation\_minus\_bg\_MO0605SPH\_vs\_MT325**  
**PD-0.462539**

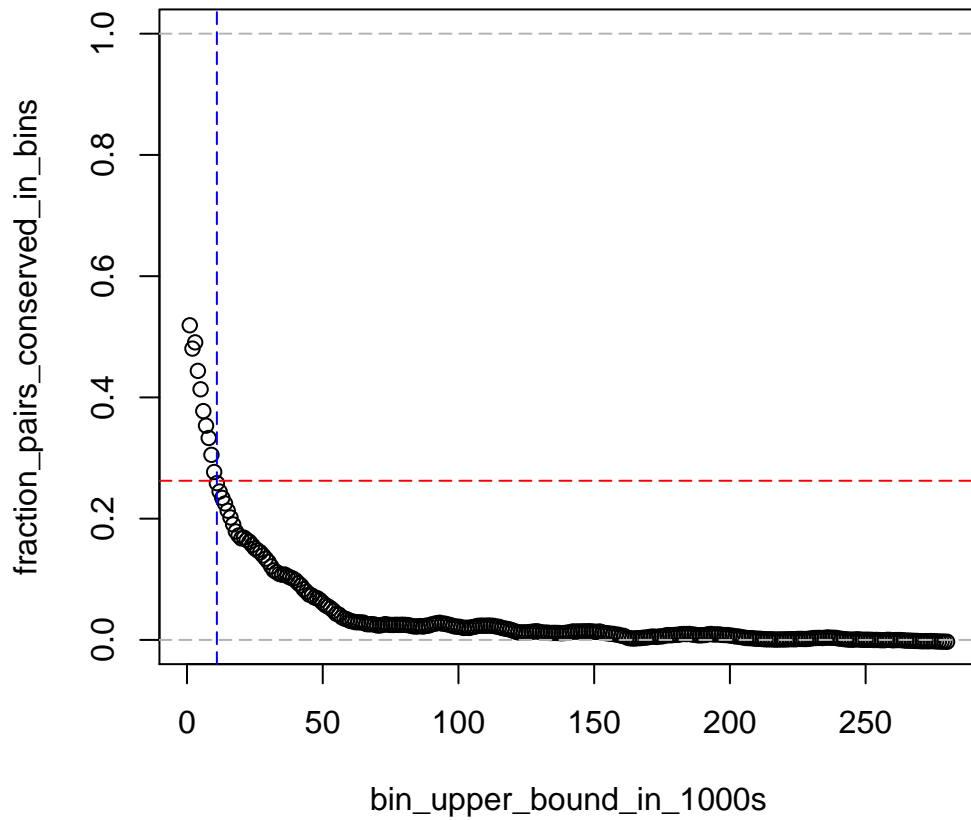

**Bin\_conservation\_minus\_bg\_MO0605SPH\_vs\_MT325**  
**PD-0.462539**

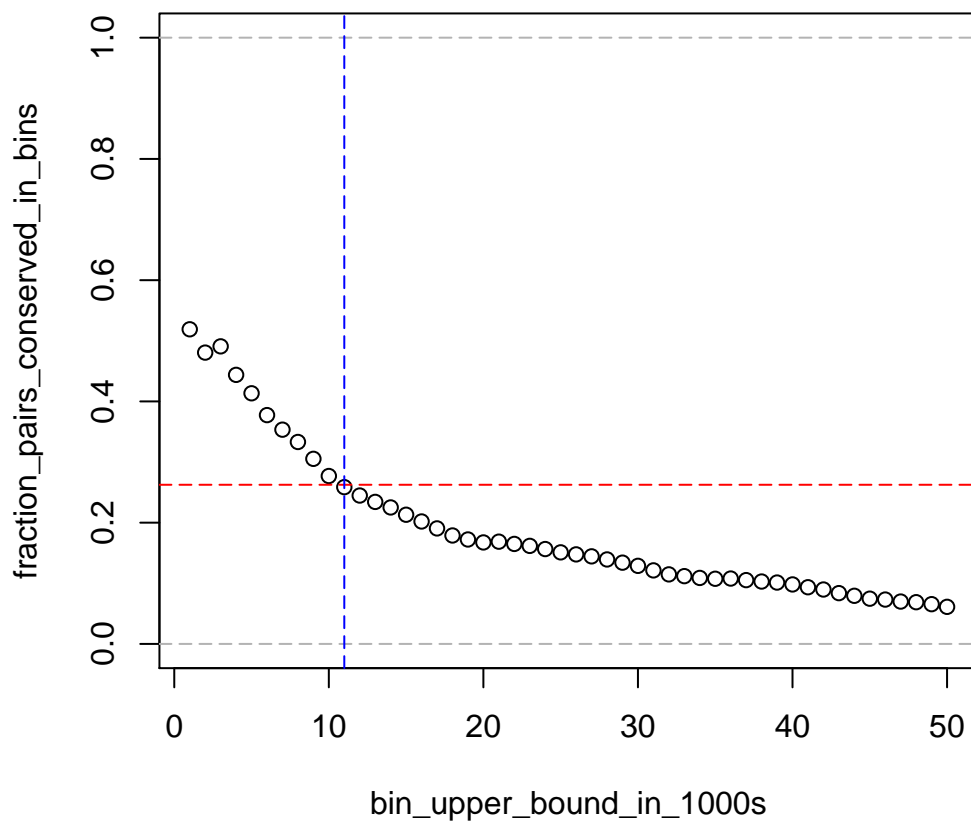

Supplement: s1 [file s1]

**Bin\_conservation\_minus\_bg\_NW665.2\_vs\_OR0704.2.2**  
**PD-0.039192**

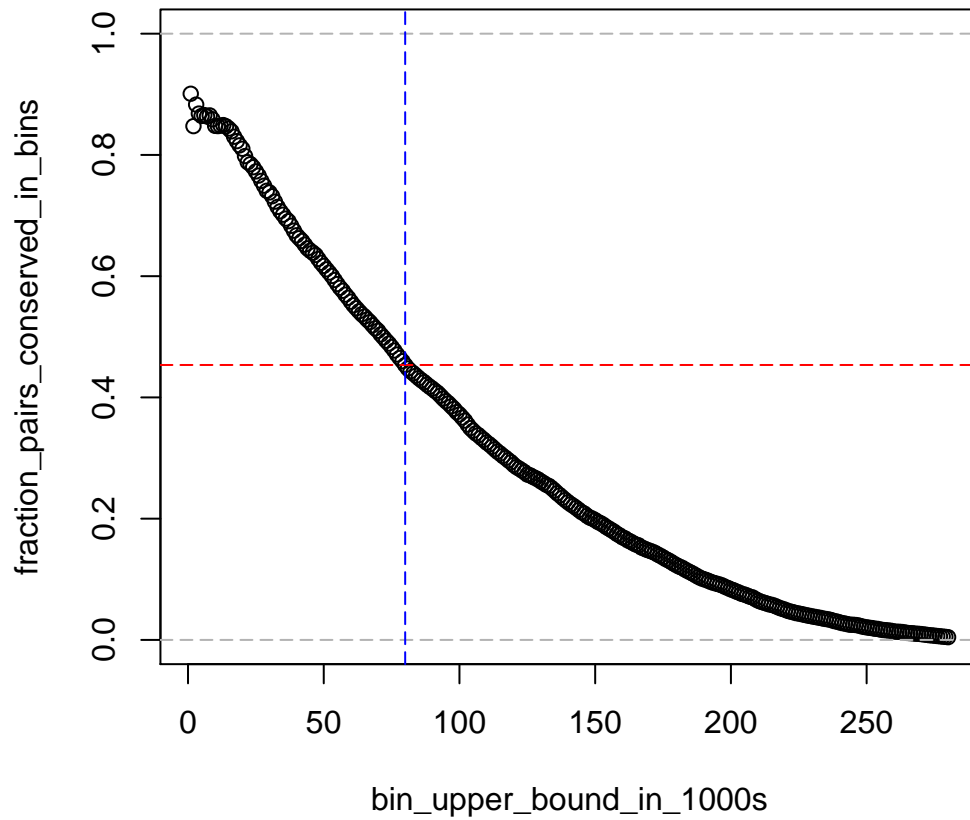

**Bin\_conservation\_minus\_bg\_NW665.2\_vs\_OR0704.2.2**  
**PD-0.039192**

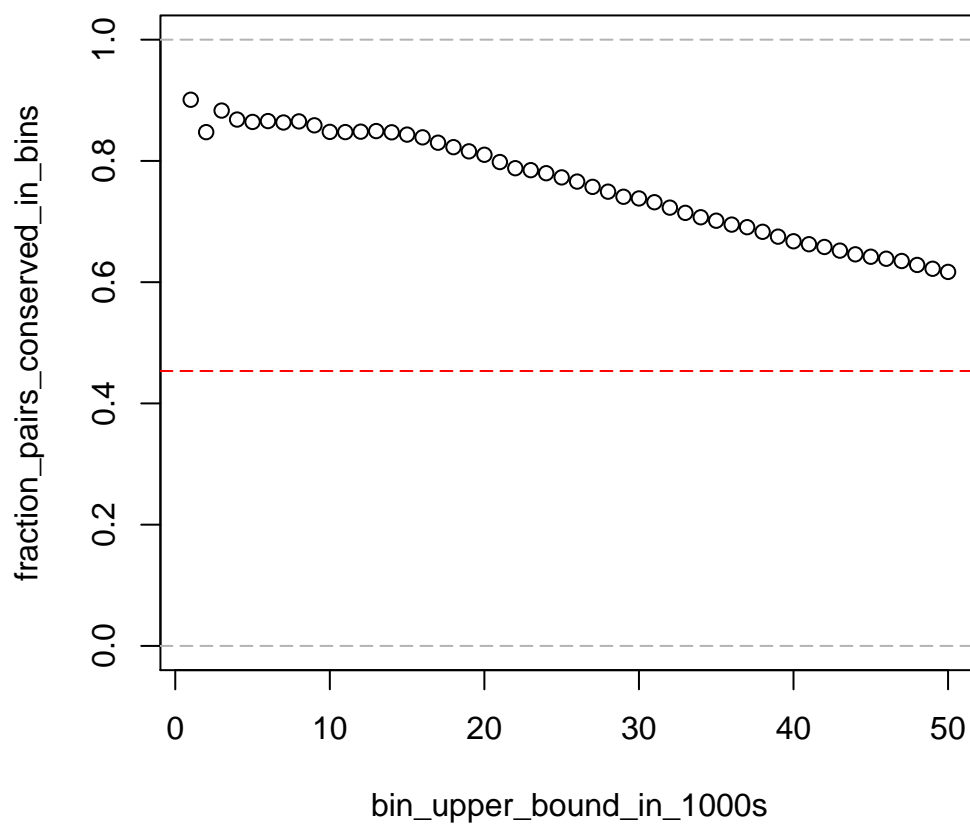

Supplement: s1 [file s1]

**Bin\_conservation\_minus\_bg\_ATCV1\_vs\_PBCV1**  
**PD-0.676109**

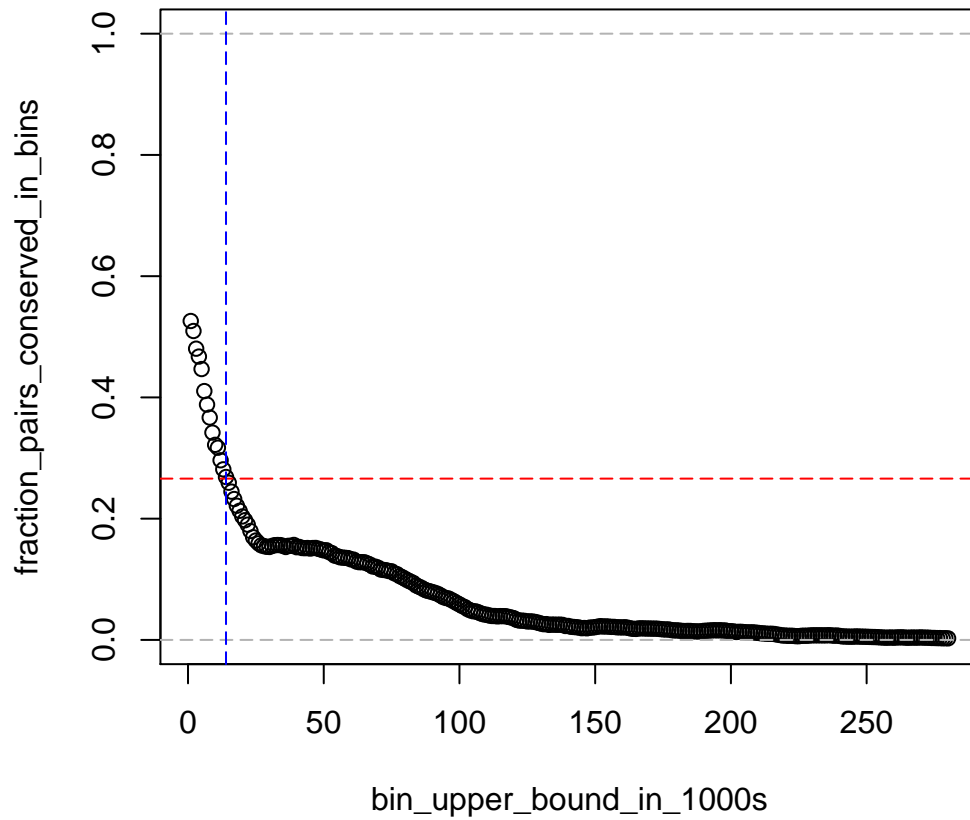

**Bin\_conservation\_minus\_bg\_ATCV1\_vs\_PBCV1**  
**PD-0.676109**

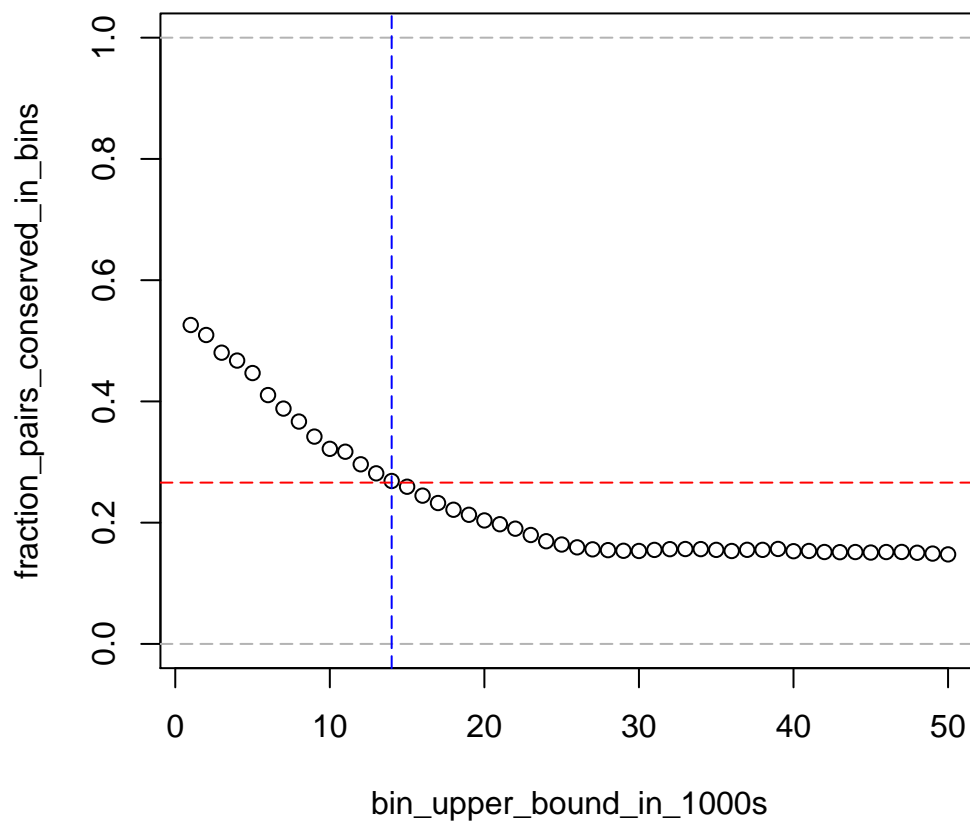

Supplement: s1 [file s1]

**Bin\_conservation\_minus\_bg\_KS1B\_vs\_MN0810.1**  
**PD-0.691124**

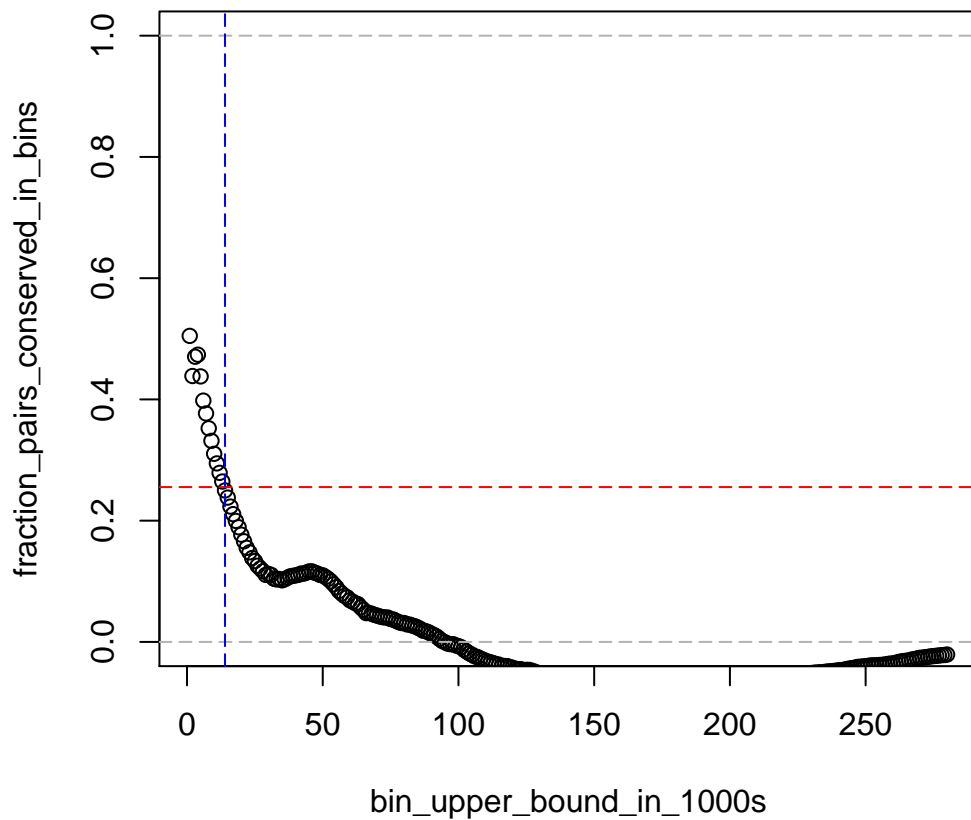

**Bin\_conservation\_minus\_bg\_KS1B\_vs\_MN0810.1**  
**PD-0.691124**

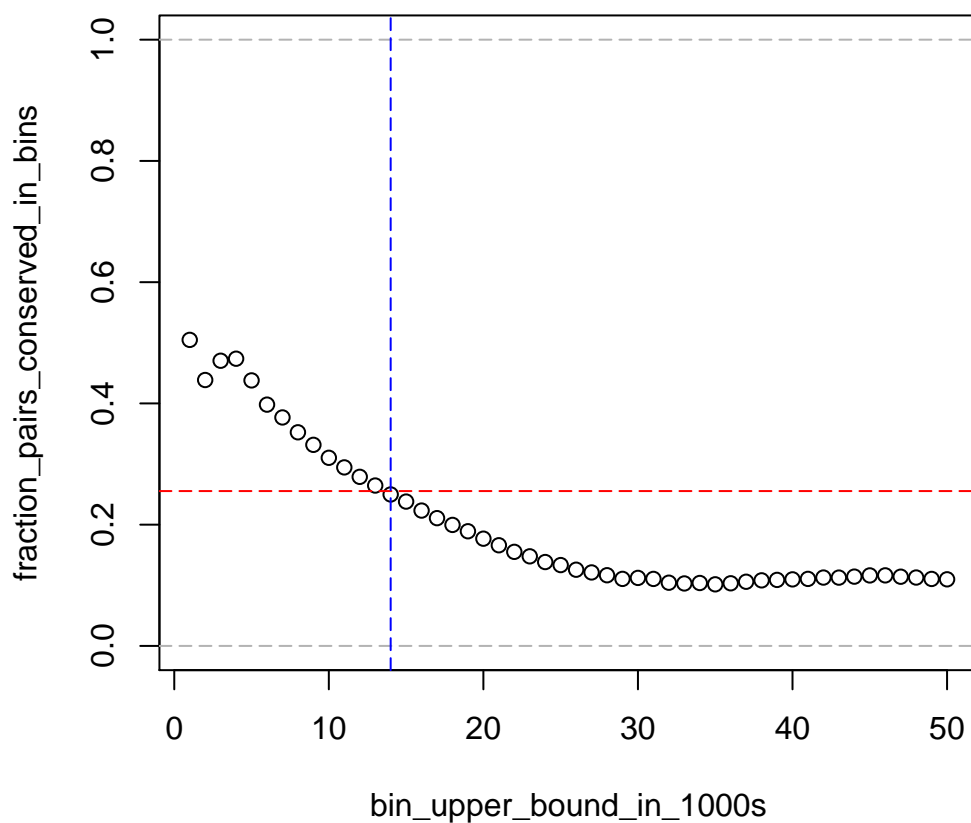

Supplement: s1 [file s1]

**Bin\_conservation\_minus\_bg\_Can18-4\_vs\_WI0606**  
**PD-0.47379**

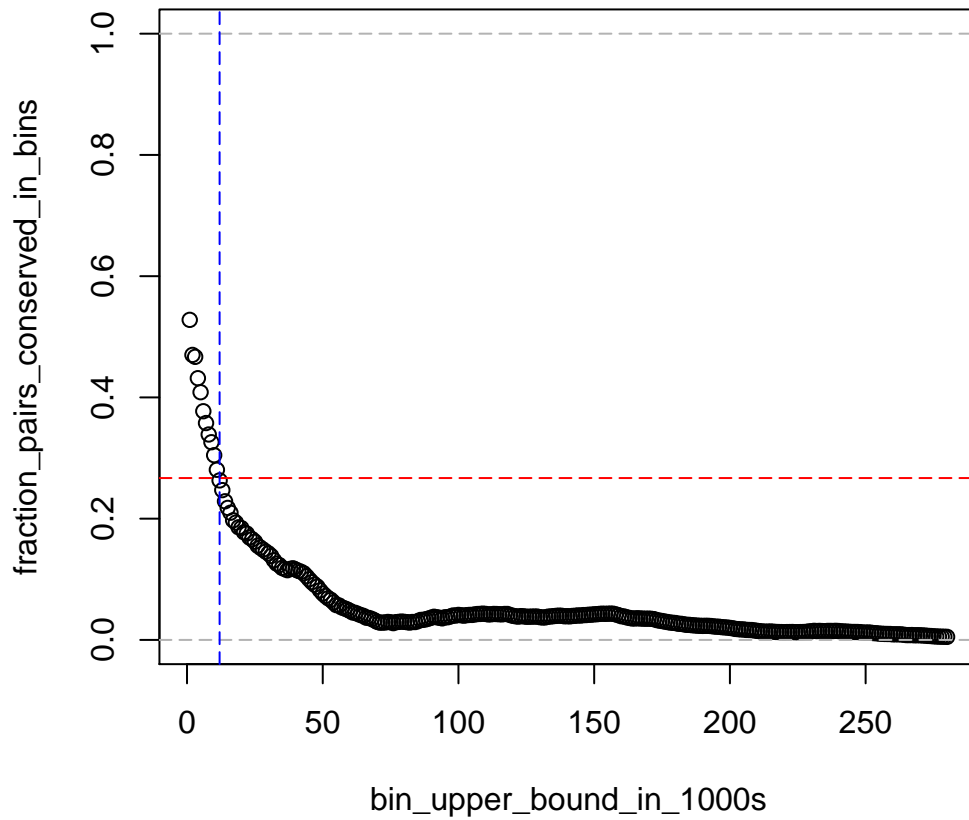

**Bin\_conservation\_minus\_bg\_Can18-4\_vs\_WI0606**  
**PD-0.47379**

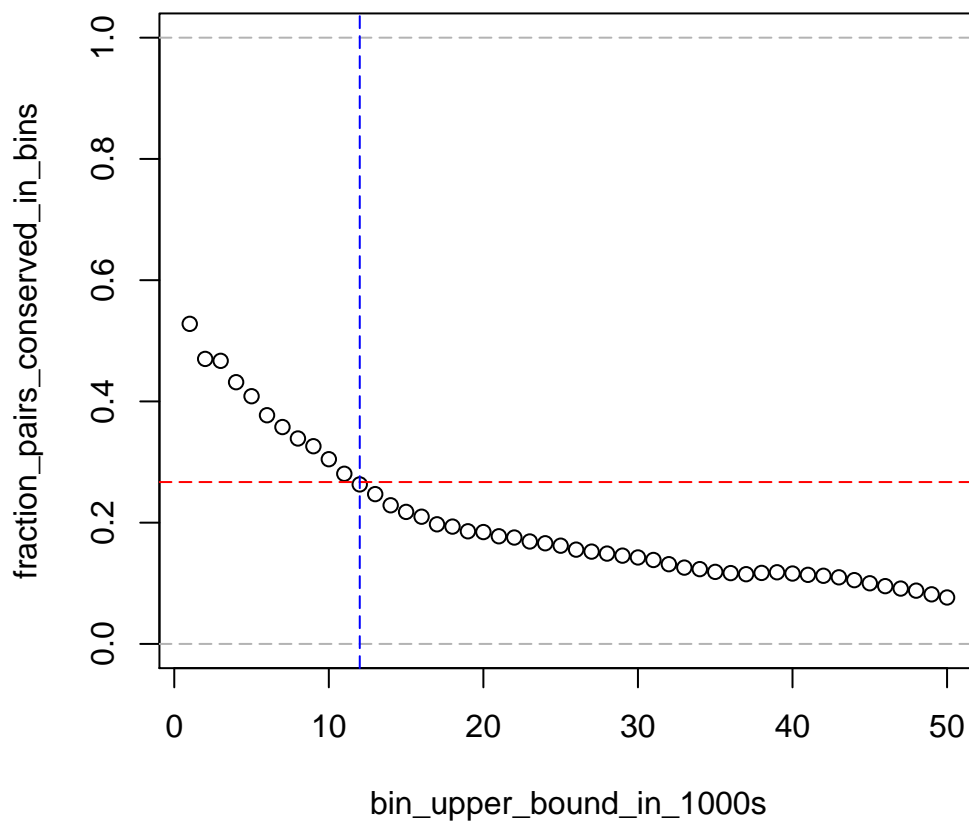

Supplement: s1 [file s1]

**Bin\_conservation\_minus\_bg\_Canal-1\_vs\_MO0605SPH**  
**PD-0.117359**

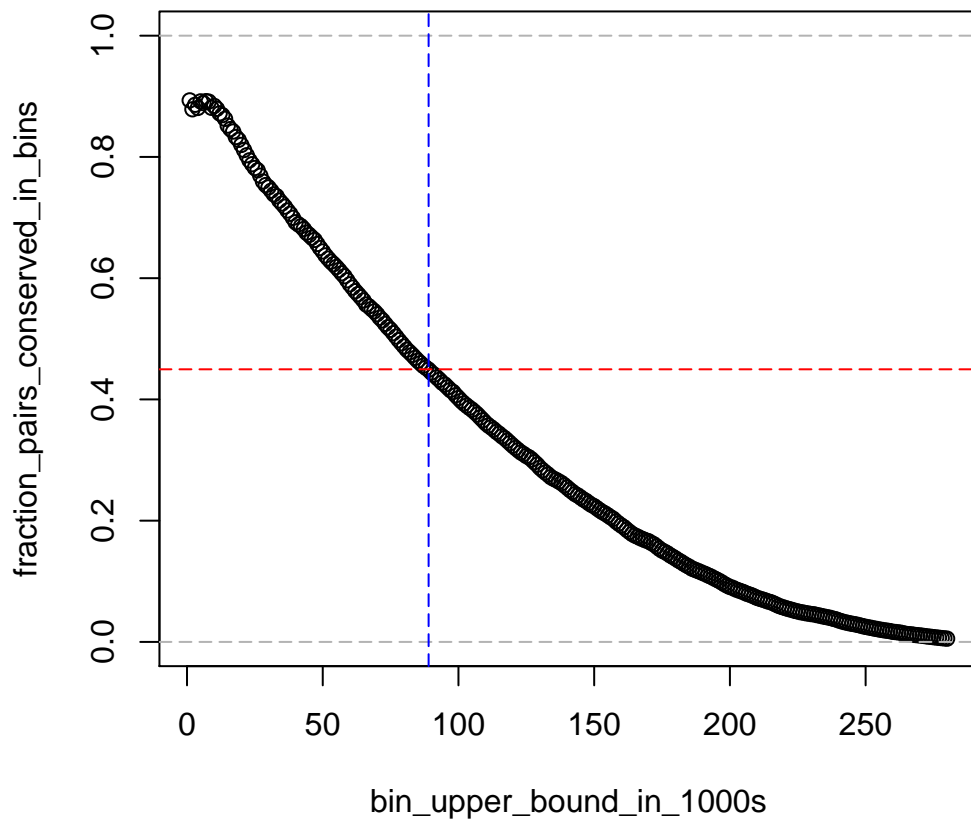

**Bin\_conservation\_minus\_bg\_Canal-1\_vs\_MO0605SPH**  
**PD-0.117359**

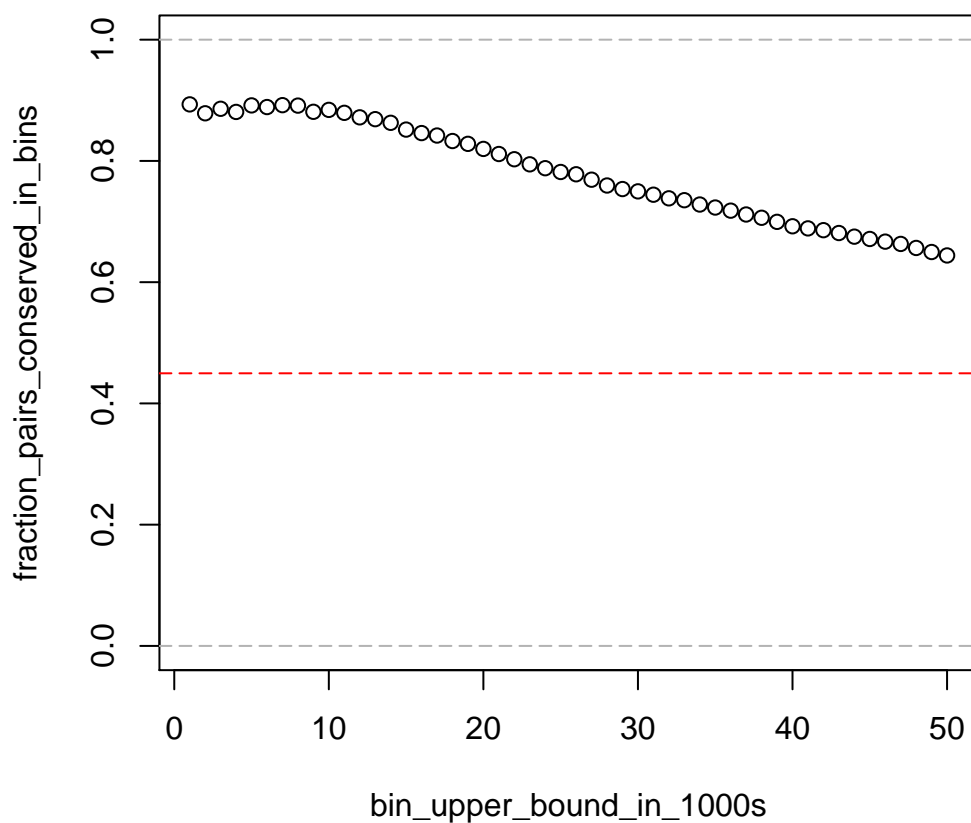

Supplement: s1 [file s1]

**Bin\_conservation\_minus\_bg\_AN69C\_vs\_OR0704.2.2**  
**PD-0.635503**

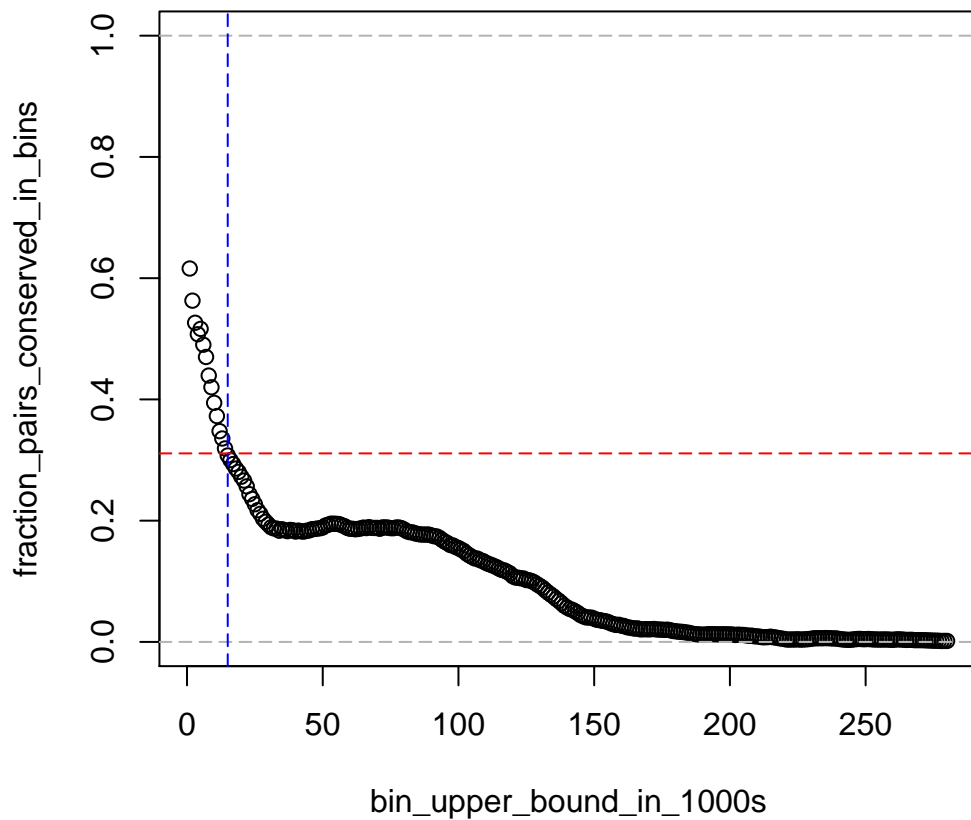

**Bin\_conservation\_minus\_bg\_AN69C\_vs\_OR0704.2.2**  
**PD-0.635503**

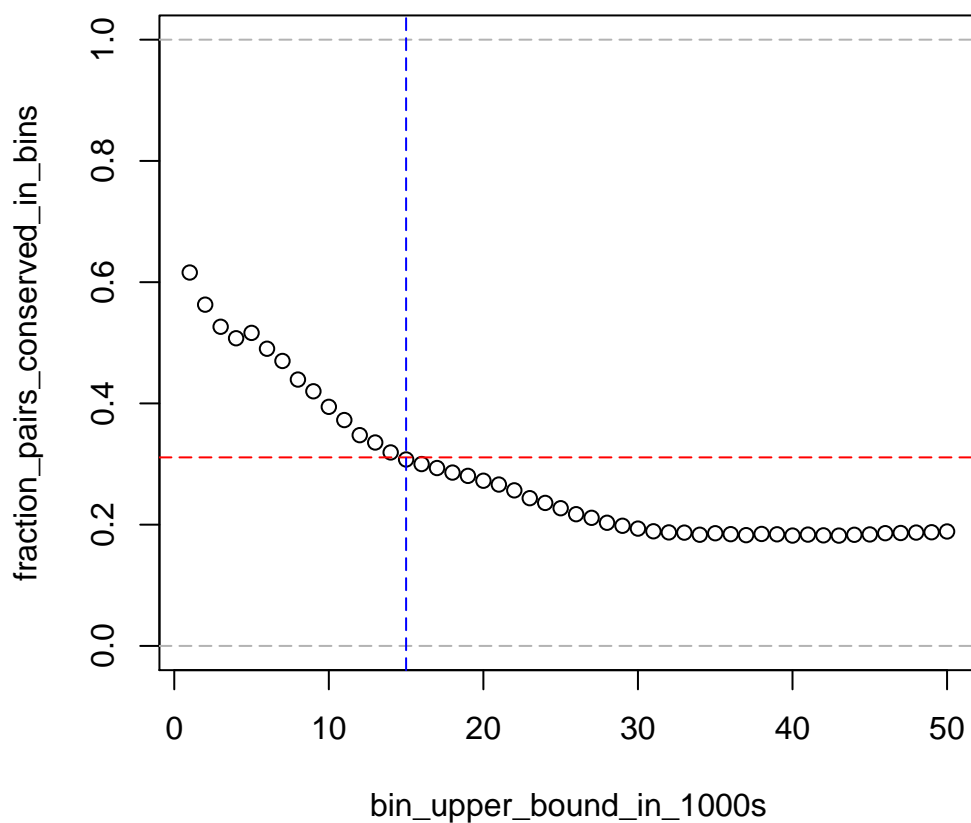

Supplement: s1 [file s1]

**Bin\_conservation\_minus\_bg\_CviKI\_vs\_NE-JV-2**  
**PD-0.693512**

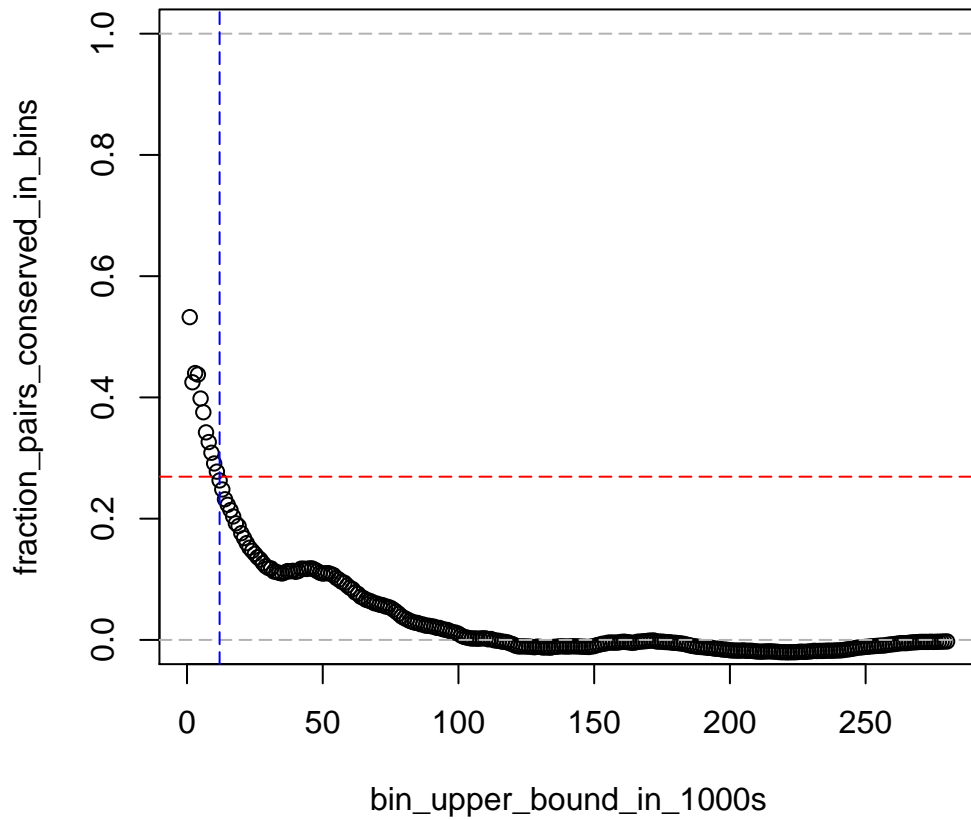

**Bin\_conservation\_minus\_bg\_CviKI\_vs\_NE-JV-2**  
**PD-0.693512**

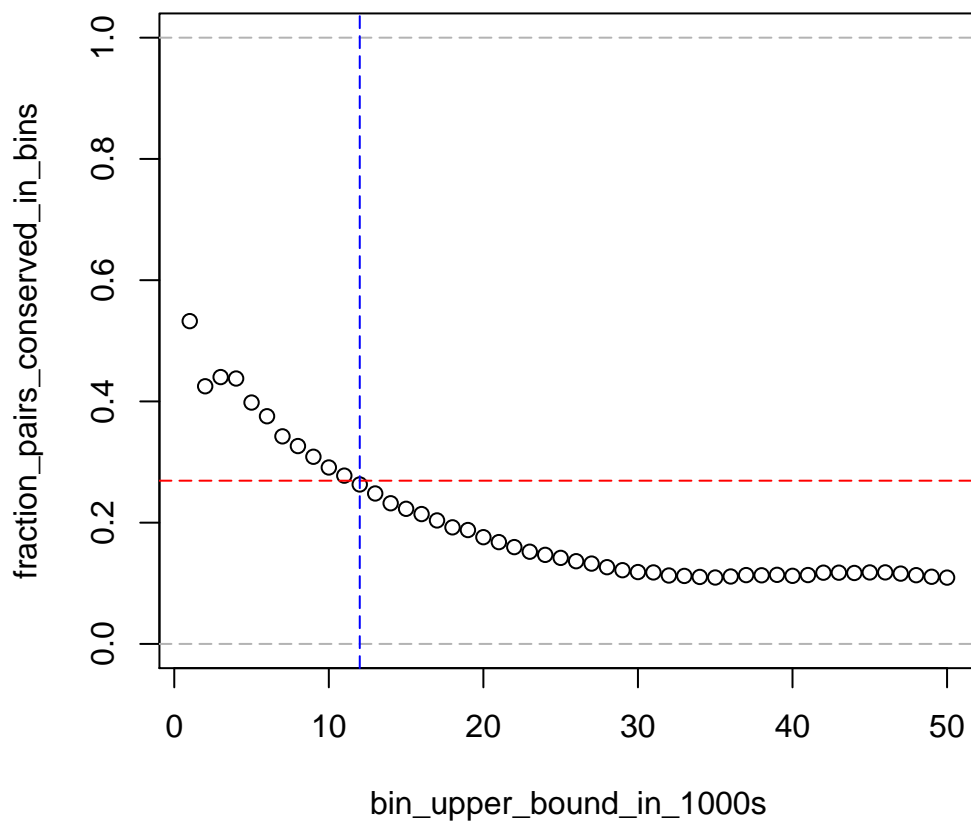

Supplement: s1 [file s1]

**Bin\_conservation\_minus\_bg\_Br0604L\_vs\_NY-2B**  
**PD-0.694629**

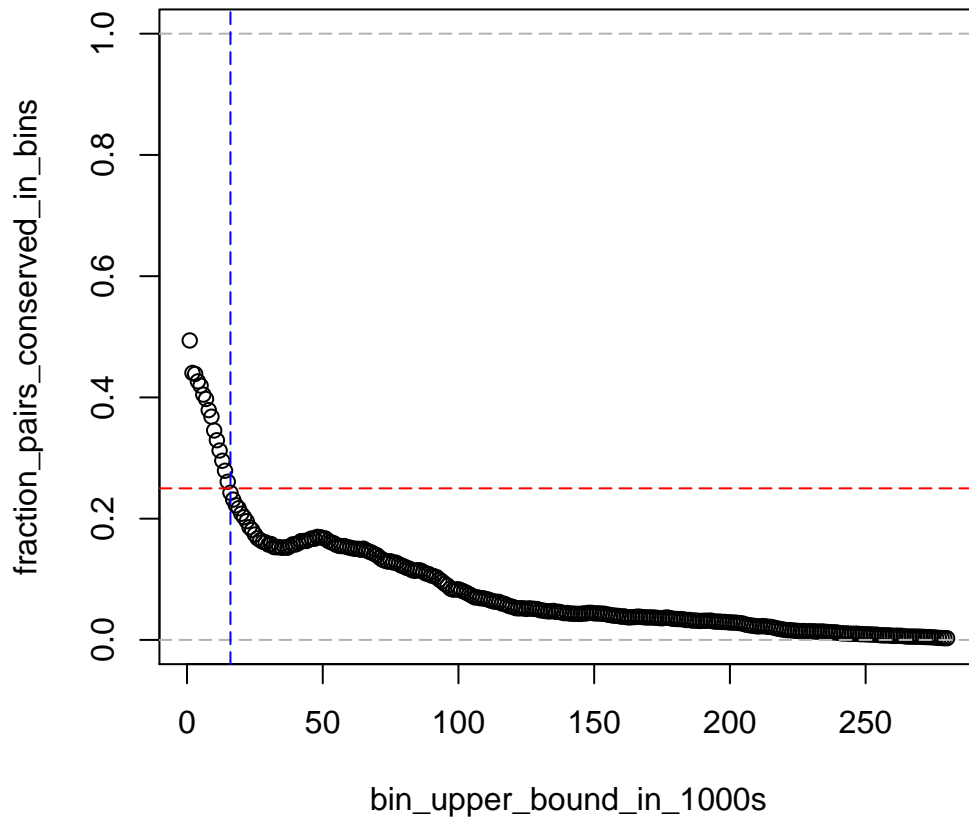

**Bin\_conservation\_minus\_bg\_Br0604L\_vs\_NY-2B**  
**PD-0.694629**

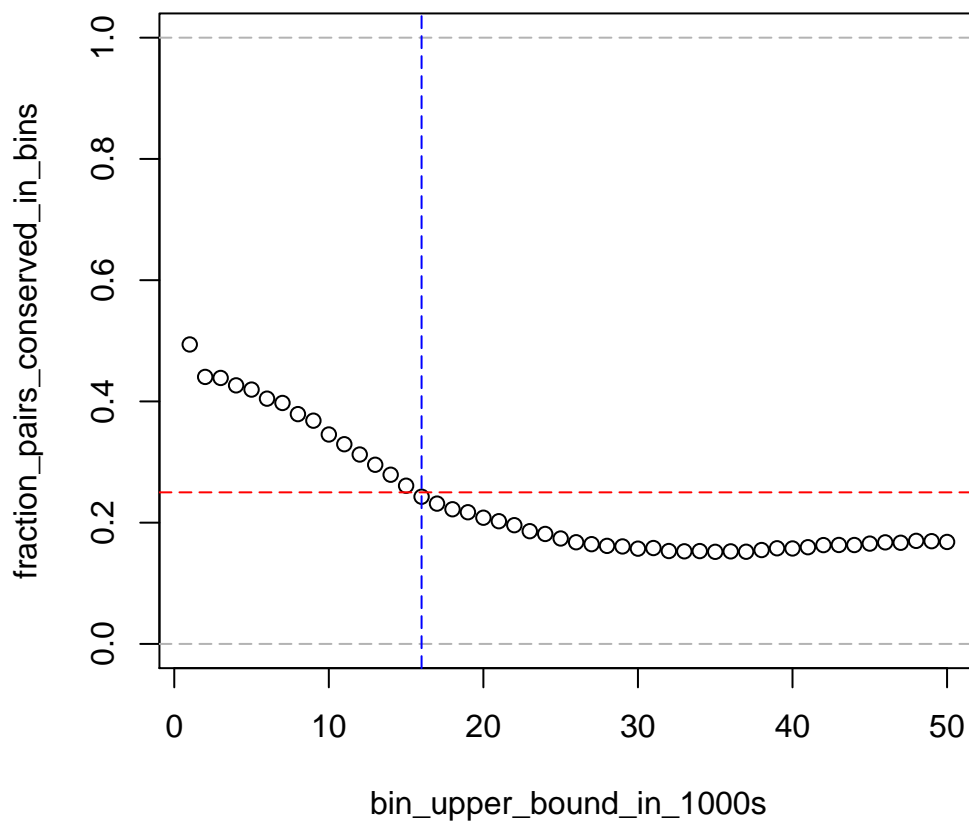

Supplement: s1 [file s1]

**Bin\_conservation\_minus\_bg\_MO0605SPH\_vs\_OR0704.3**  
**PD-0.023355**

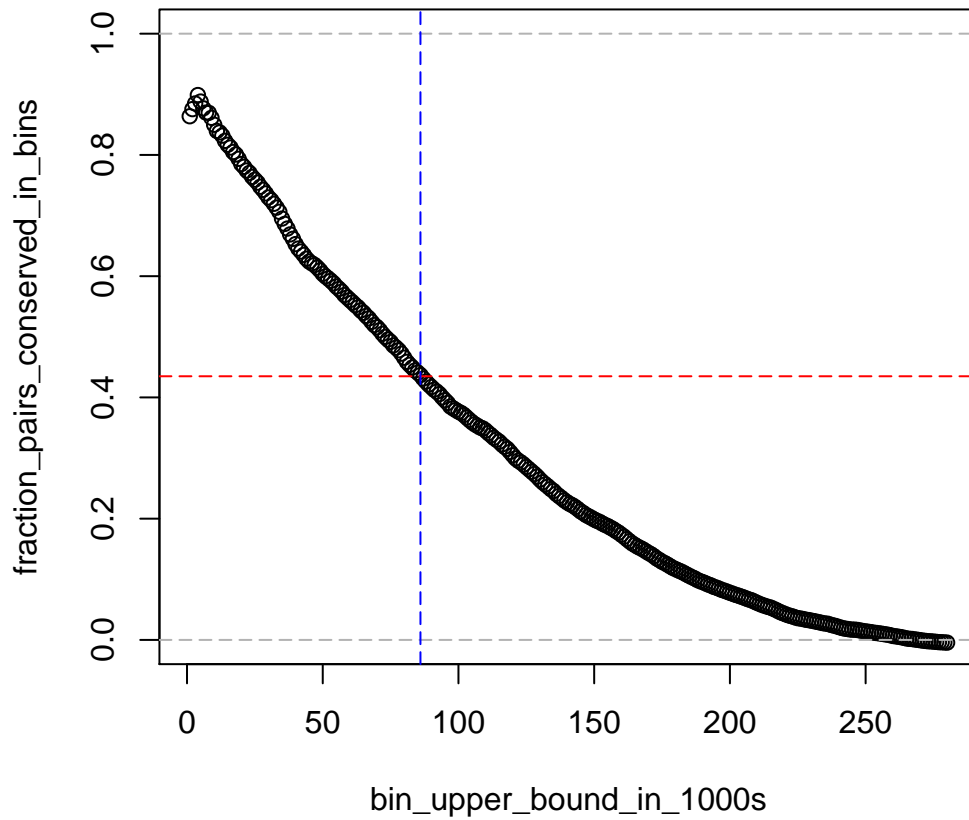

**Bin\_conservation\_minus\_bg\_MO0605SPH\_vs\_OR0704.3**  
**PD-0.023355**

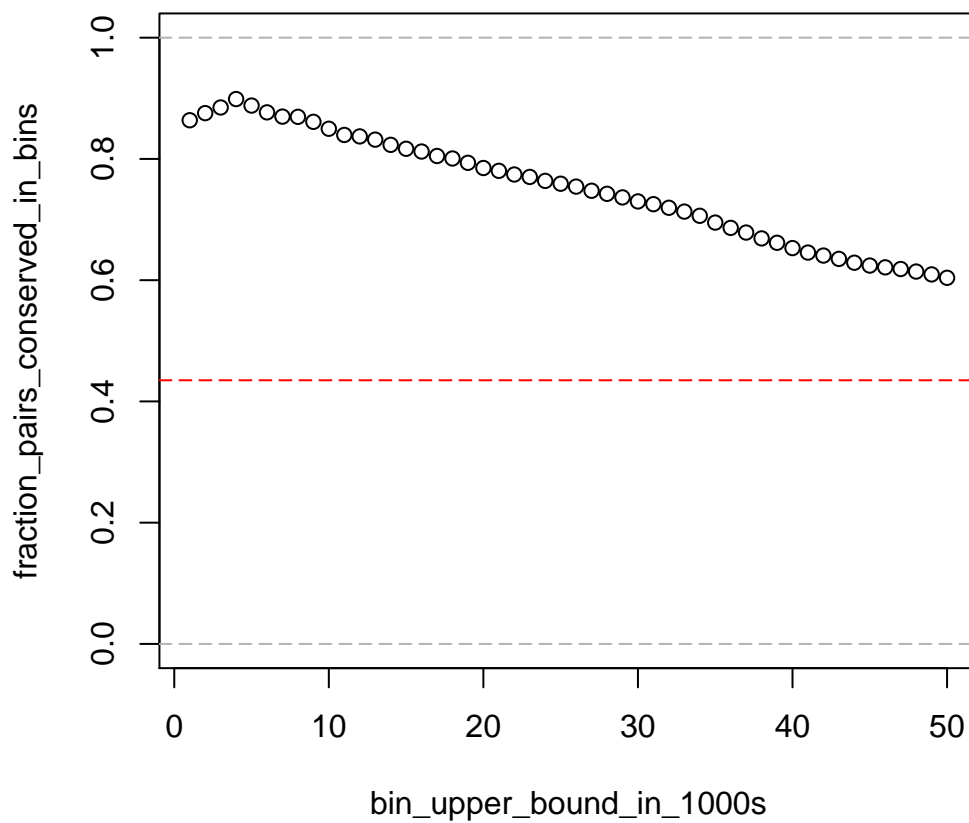

Supplement: s1 [file s1]

**Bin\_conservation\_minus\_bg\_CVA-1\_vs\_NE-JV-1**  
**PD-0.355029**

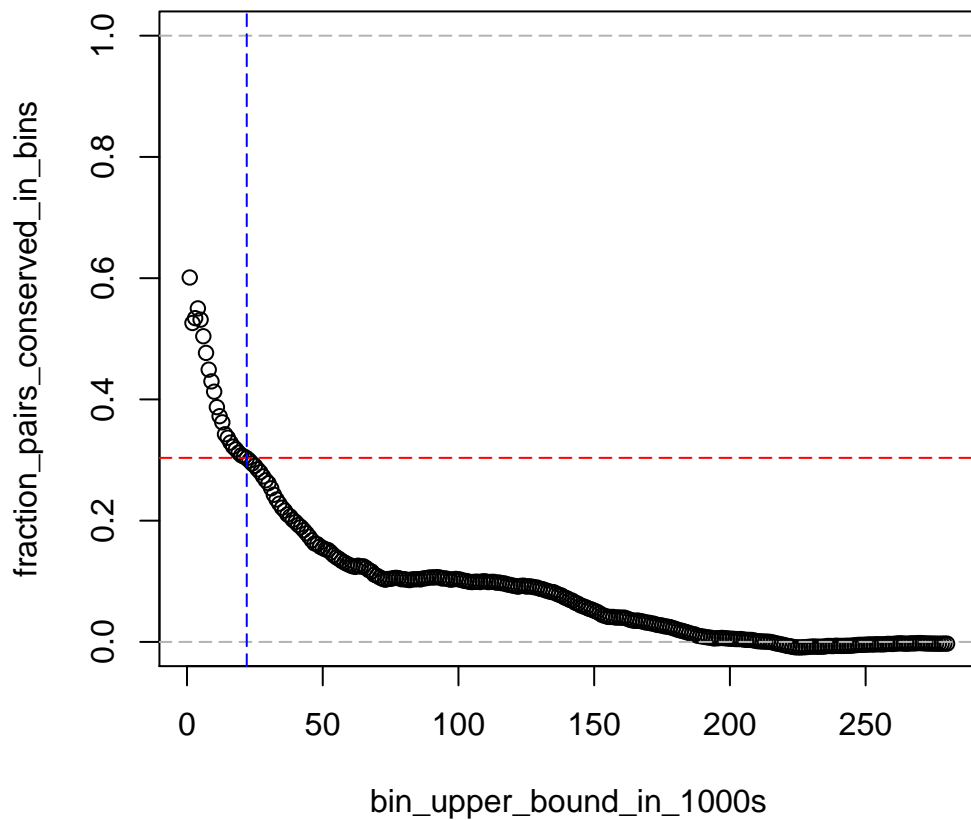

**Bin\_conservation\_minus\_bg\_CVA-1\_vs\_NE-JV-1**  
**PD-0.355029**

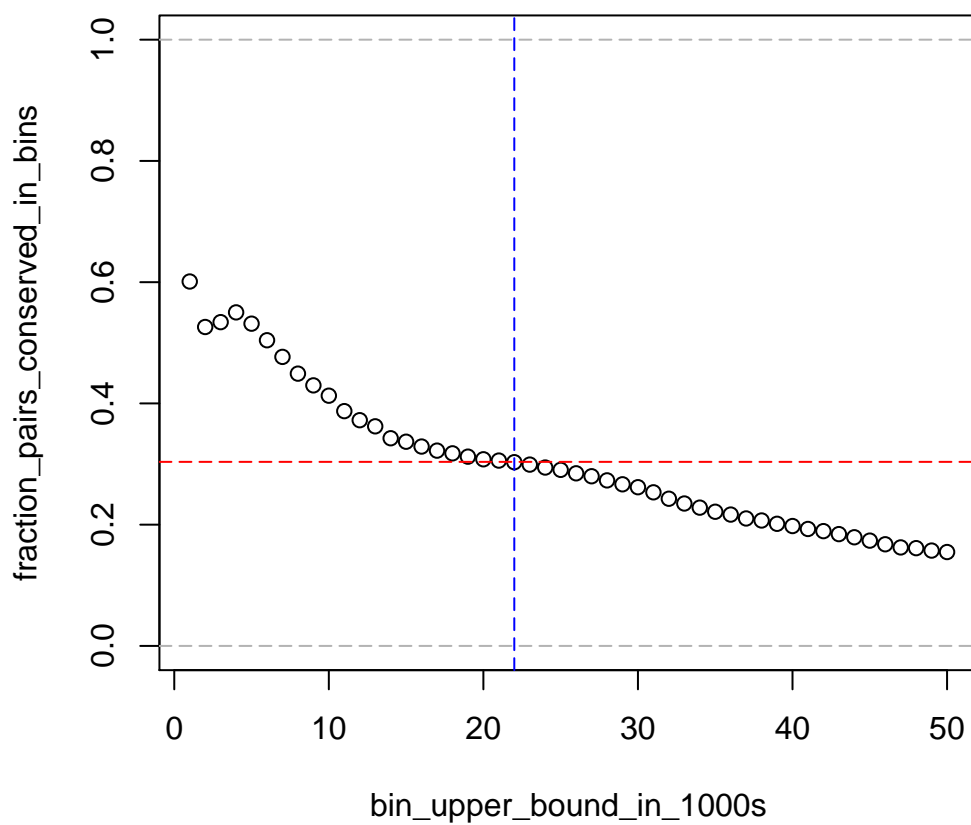

Supplement: s1 [file s1]

**Bin\_conservation\_minus\_bg\_ATCV1\_vs\_CVG-1**  
**PD-0.461192**

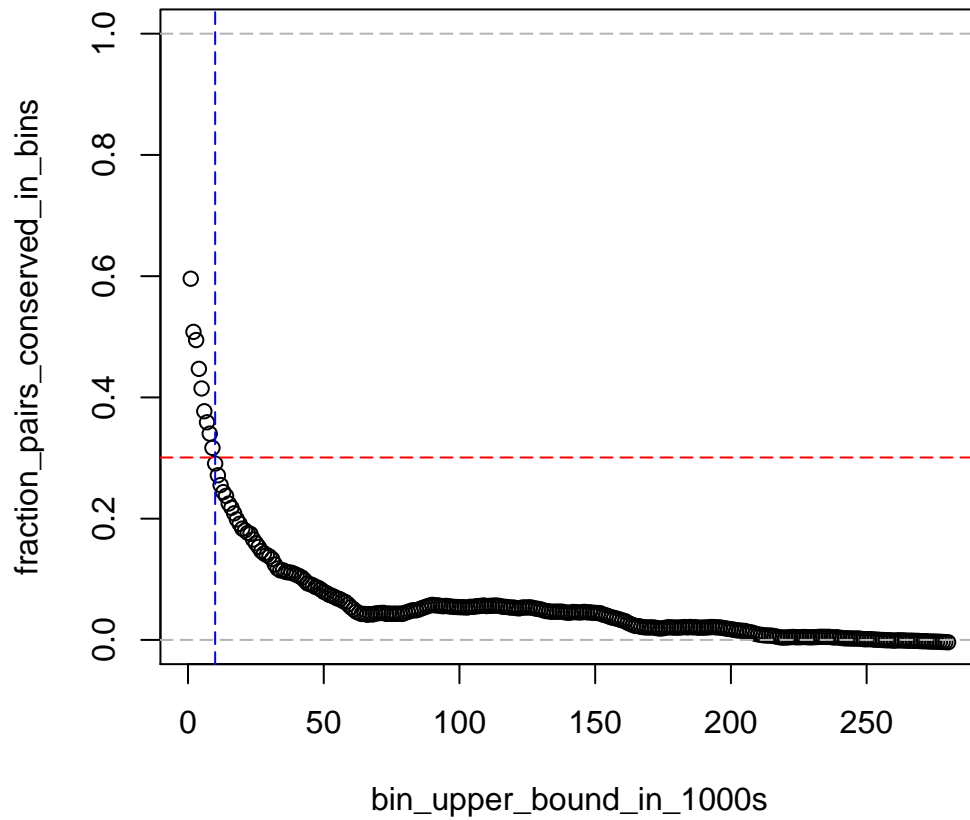

**Bin\_conservation\_minus\_bg\_ATCV1\_vs\_CVG-1**  
**PD-0.461192**

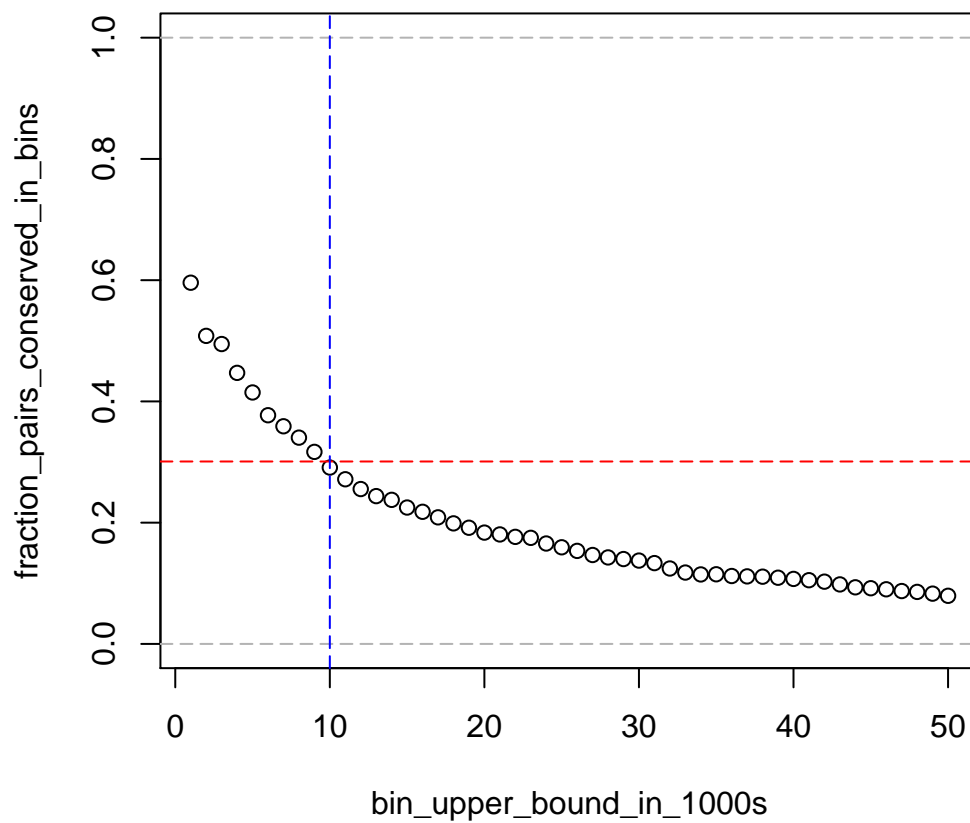

Supplement: s1 [file s1]

**Bin\_conservation\_minus\_bg\_Can18-4\_vs\_NTS-1**  
**PD-0.464734**

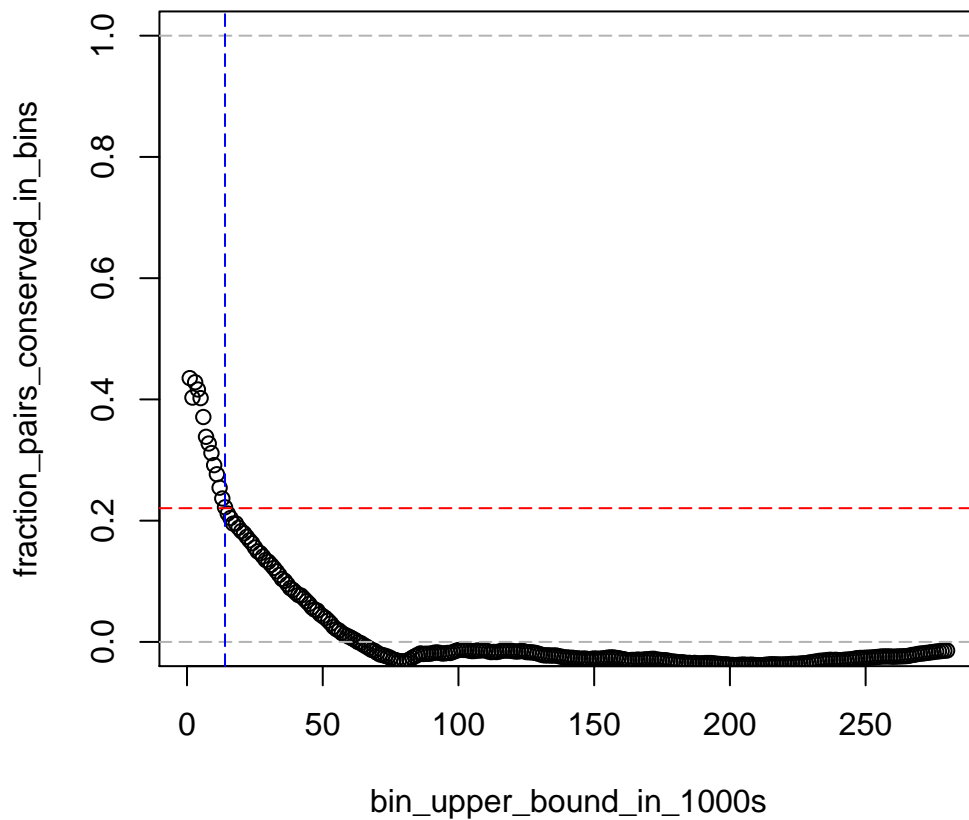

**Bin\_conservation\_minus\_bg\_Can18-4\_vs\_NTS-1**  
**PD-0.464734**

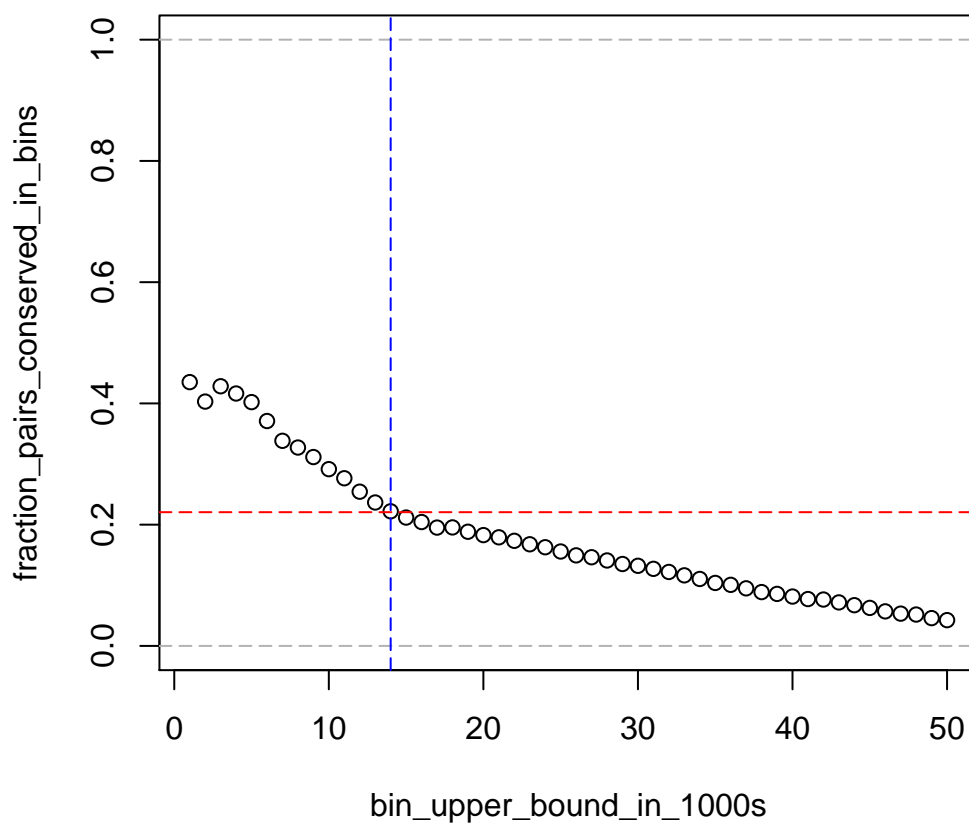

Supplement: s1 [file s1]

# Probable functional group distribution of PBCV-1 Gene Gang member, n=129

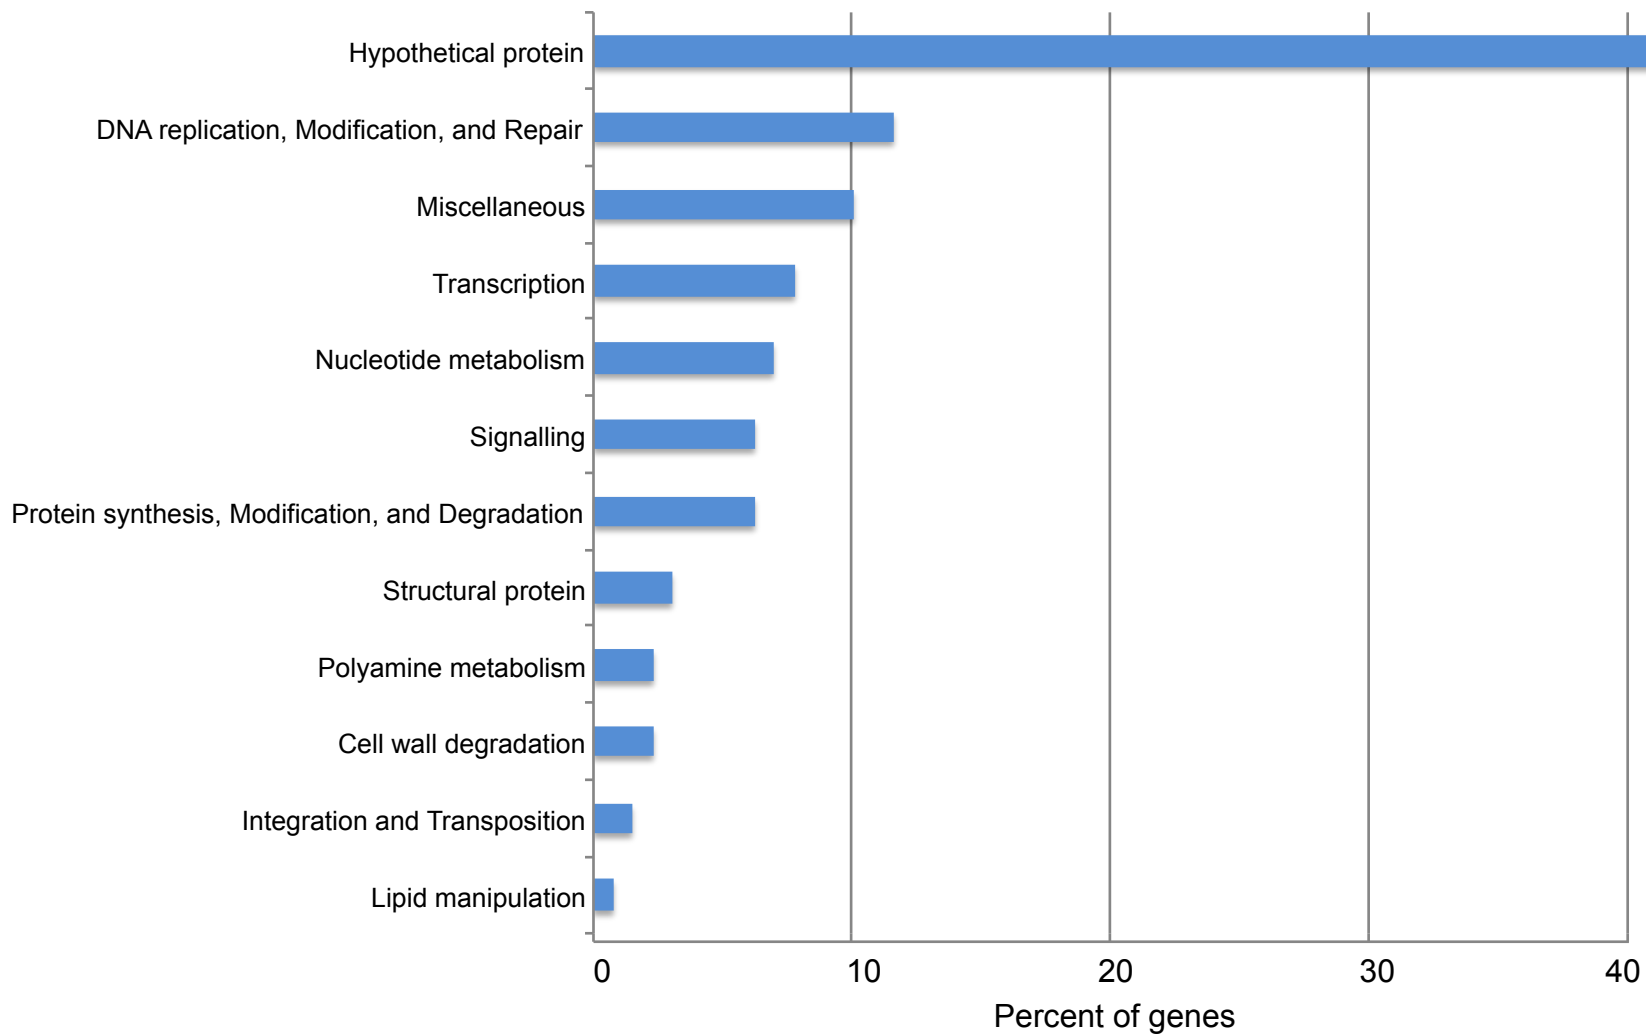

Supplement: s1 [file s1]

**Bin\_conservation\_minus\_bg\_CVG-1\_vs\_PBCV1**  
**PD-0.636503**

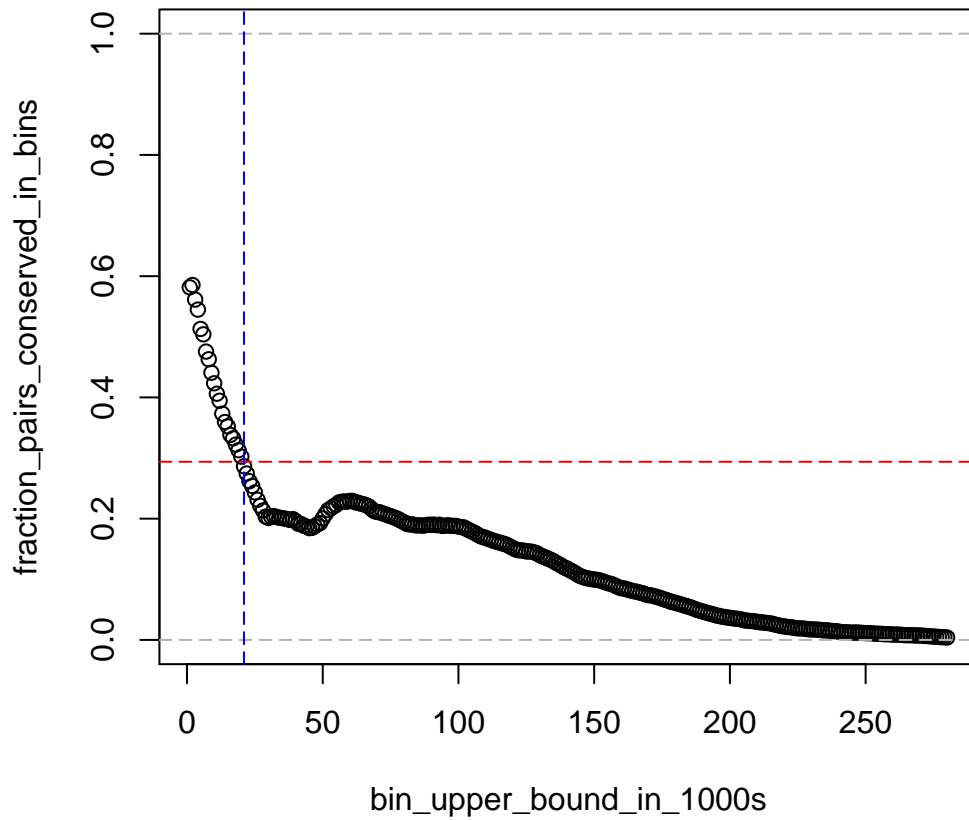

**Bin\_conservation\_minus\_bg\_CVG-1\_vs\_PBCV1**  
**PD-0.636503**

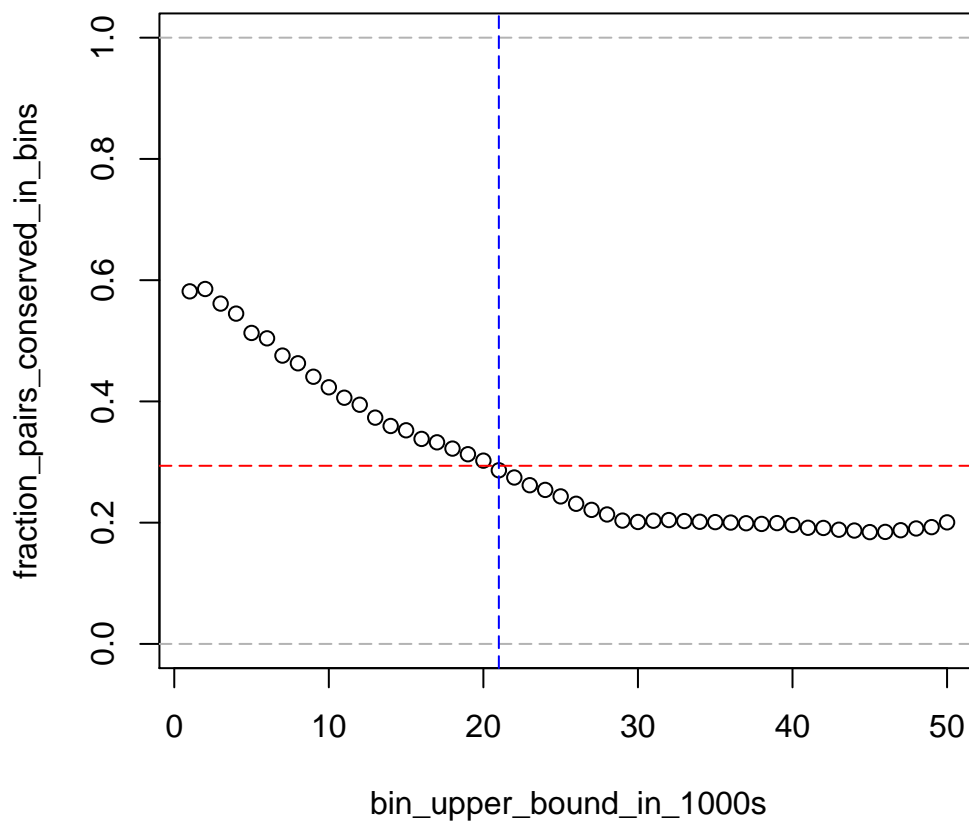

Supplement: s1 [file s1]

**Bin\_conservation\_minus\_bg\_Br0604L\_vs\_TN603.4.2**  
**PD-0.01441**

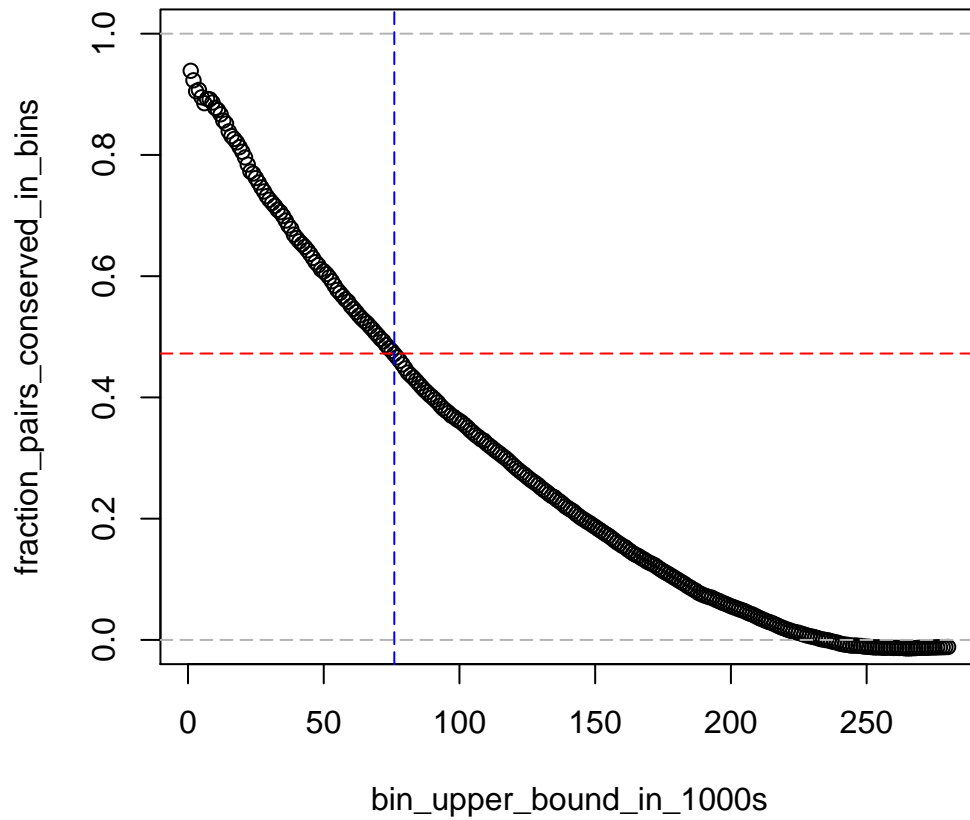

**Bin\_conservation\_minus\_bg\_Br0604L\_vs\_TN603.4.2**  
**PD-0.01441**

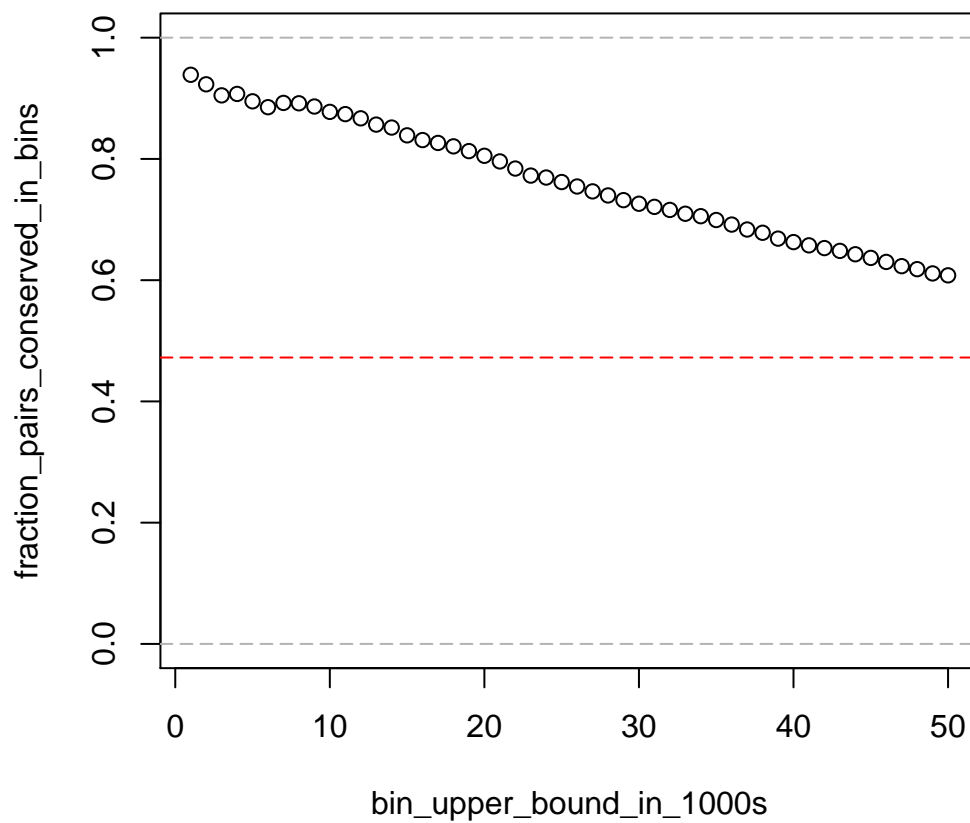

Supplement: s1 [file s1]

**Bin\_conservation\_minus\_bg\_Br0604L\_vs\_CviKI**  
**PD-0.682841**

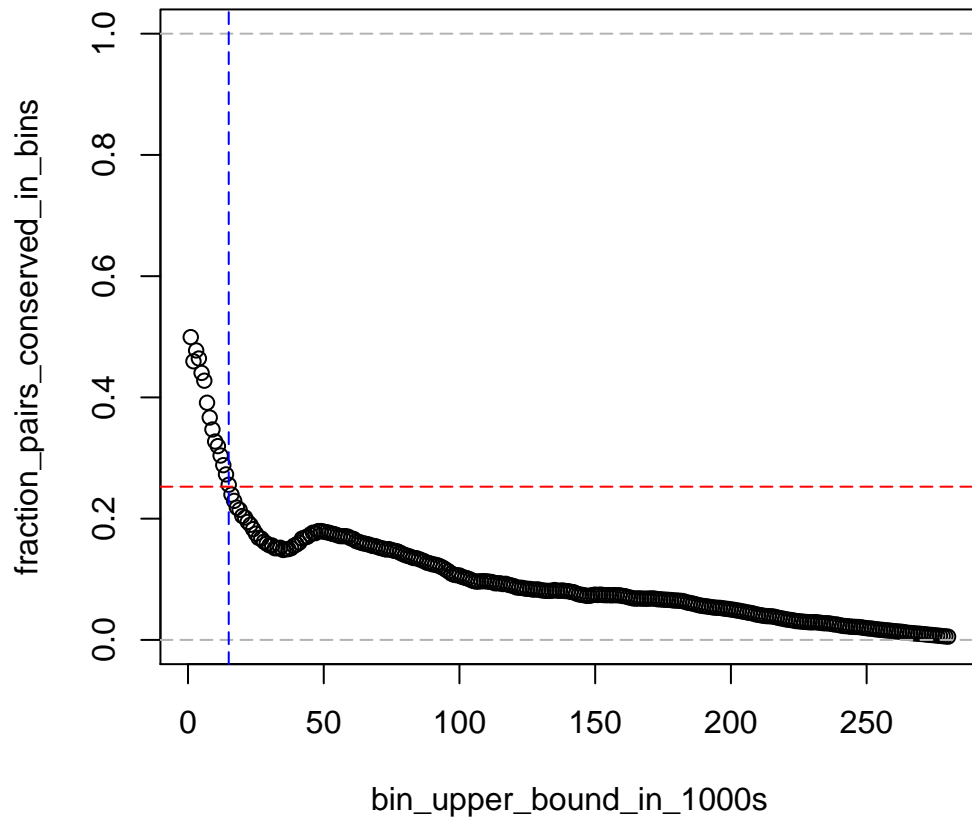

**Bin\_conservation\_minus\_bg\_Br0604L\_vs\_CviKI**  
**PD-0.682841**

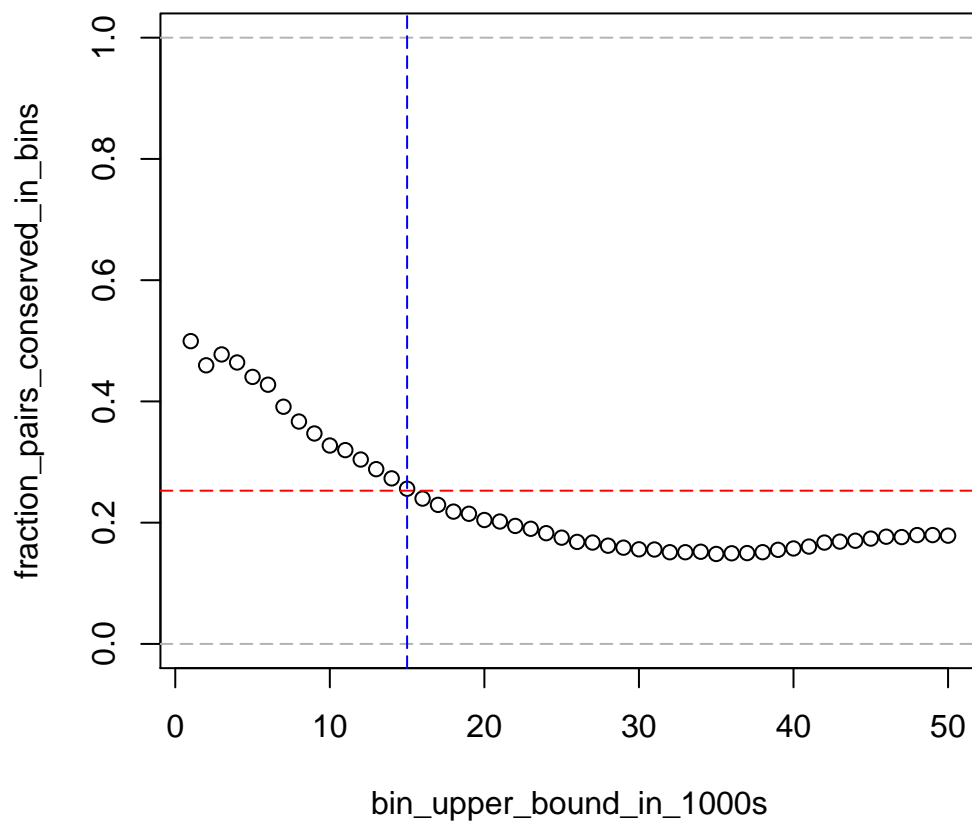

Supplement: s1 [file s1]
