# Supplementary figures and images for: Gene Gangs of the Chloroviruses: Conserved Clusters of Collinear Monocistronic Genes (part 8 of 9)
Source: MDPI journal article supplement (doi:10.3390/v10100576), 2018-10-20

**Bin\_conservation\_minus\_bg\_CVB-1\_vs\_NE-JV-2**  
**PD-0.475824**

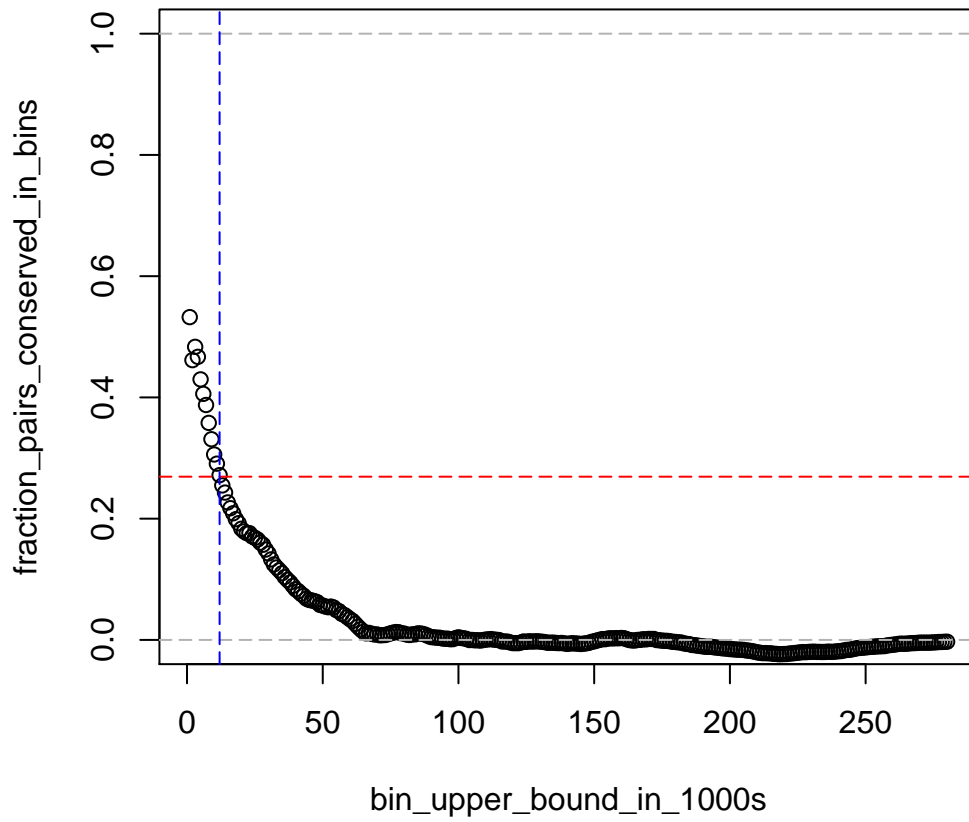

**Bin\_conservation\_minus\_bg\_CVB-1\_vs\_NE-JV-2**  
**PD-0.475824**

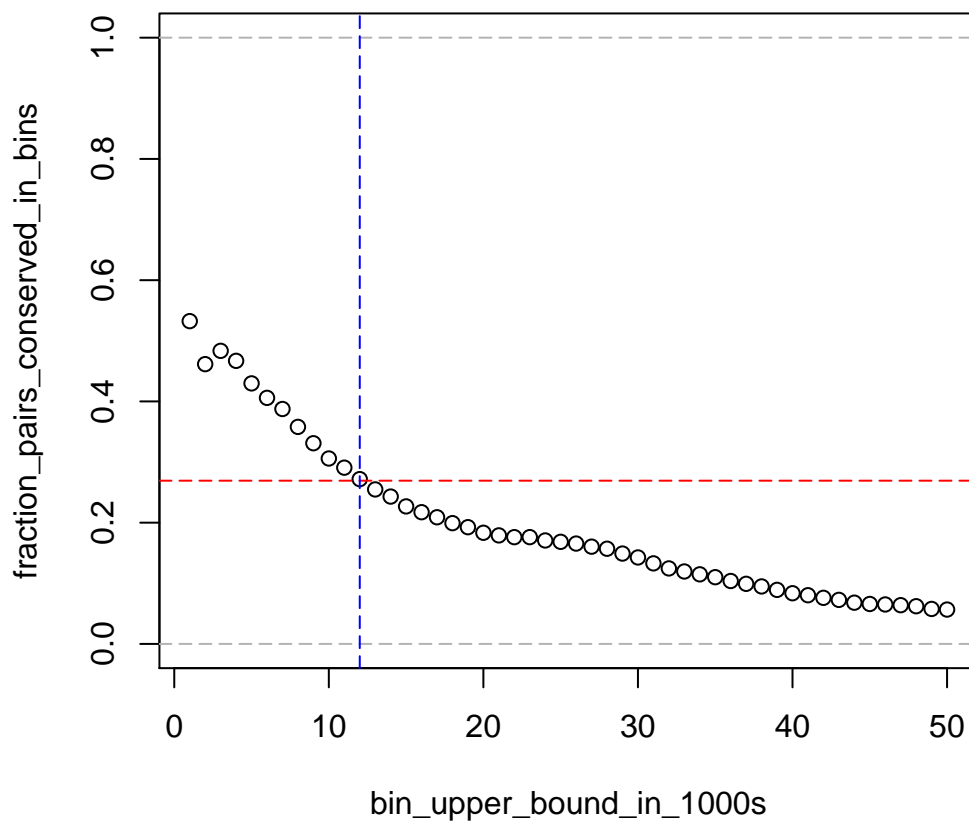

Supplement: s1 [file s1]

**Bin\_conservation\_minus\_bg\_FR483\_vs\_MN0810.1**  
**PD-0.462823**

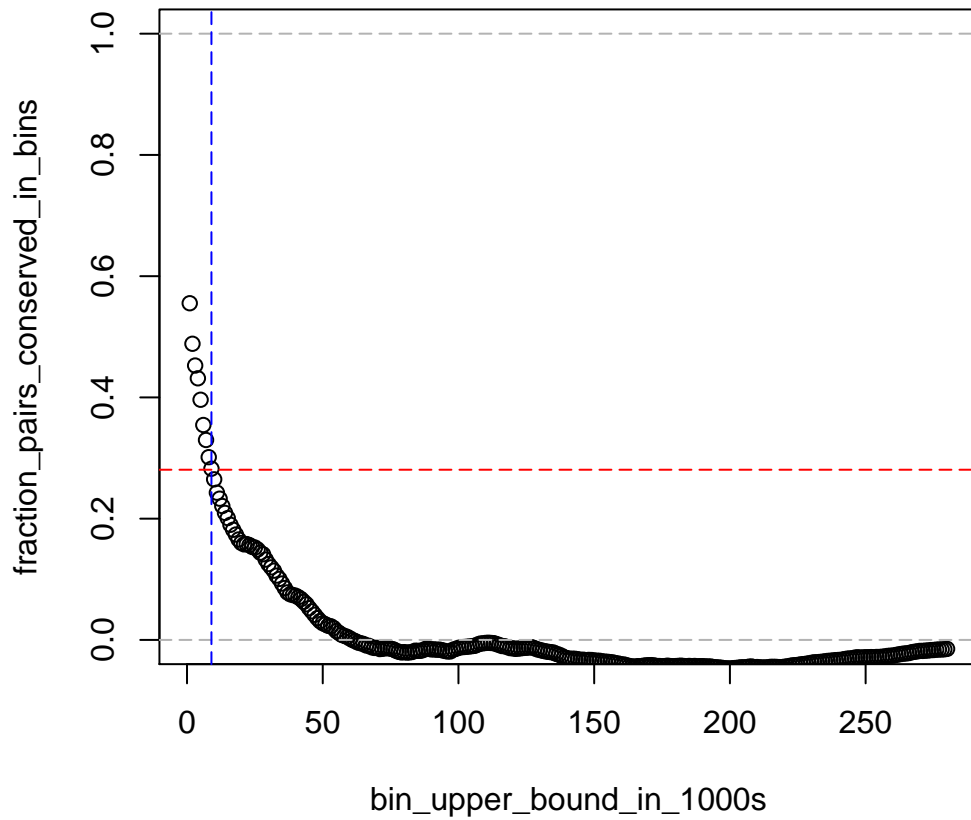

**Bin\_conservation\_minus\_bg\_FR483\_vs\_MN0810.1**  
**PD-0.462823**

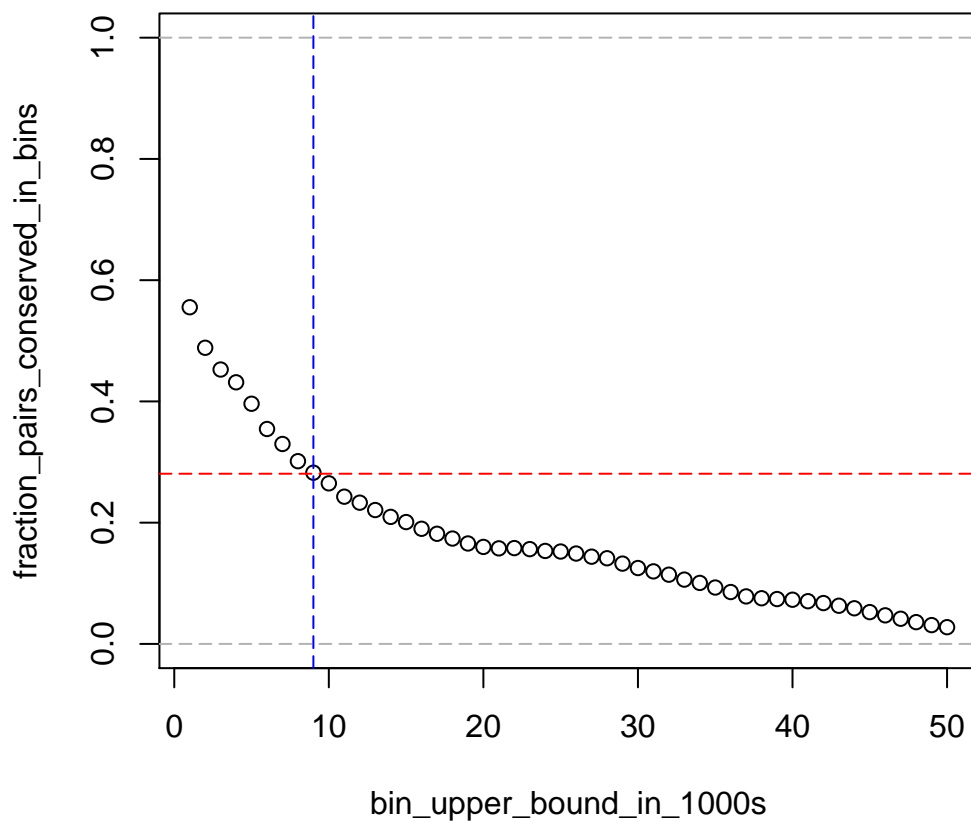

Supplement: s1 [file s1]

**Bin\_conservation\_minus\_bg\_CVG-1\_vs\_MA-1D**  
**PD-0.660587**

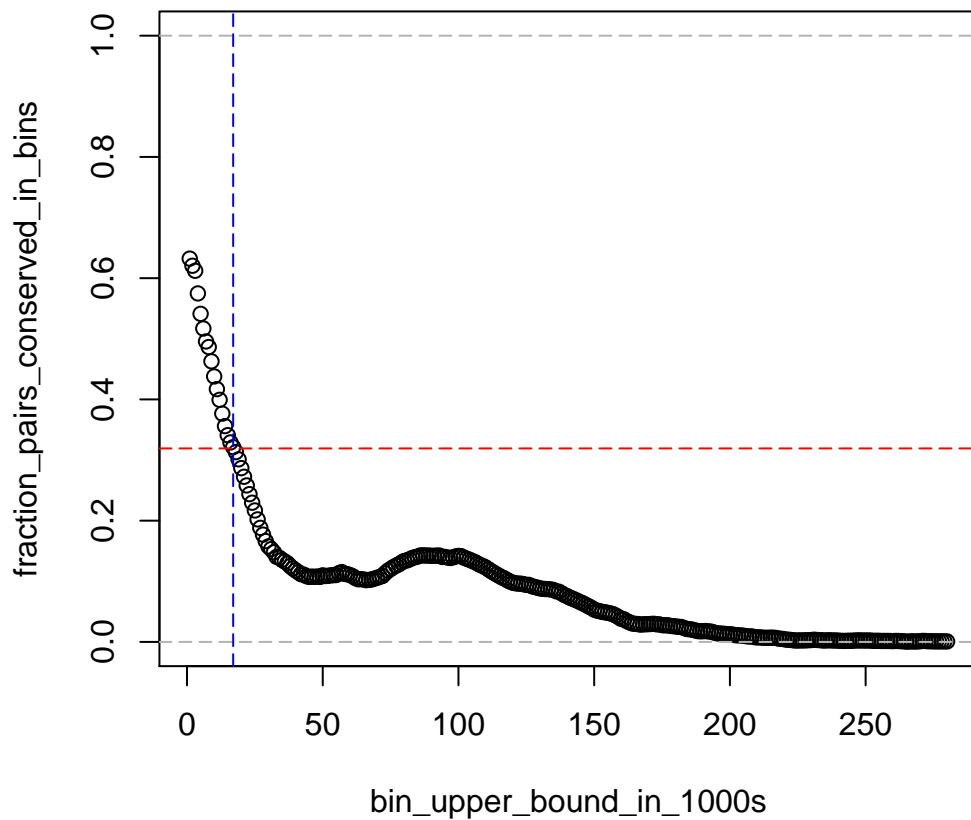

**Bin\_conservation\_minus\_bg\_CVG-1\_vs\_MA-1D**  
**PD-0.660587**

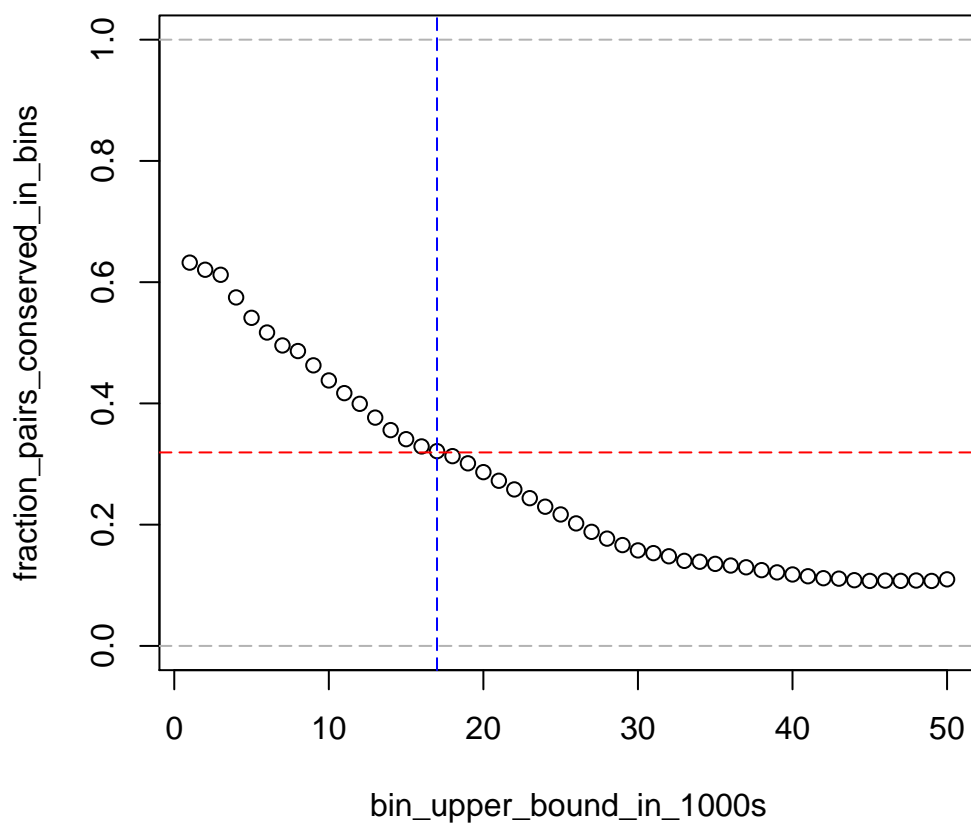

Supplement: s1 [file s1]

**Bin\_conservation\_minus\_bg\_AN69C\_vs\_IL-5-2s1**  
**PD-0.132257**

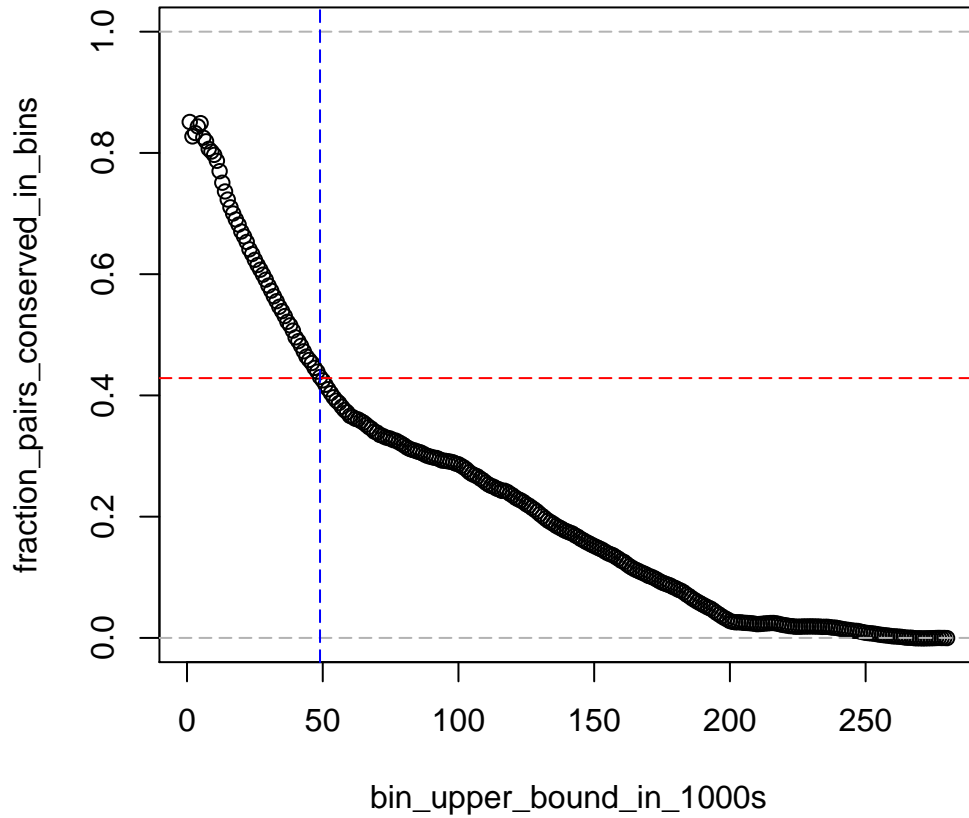

**Bin\_conservation\_minus\_bg\_AN69C\_vs\_IL-5-2s1**  
**PD-0.132257**

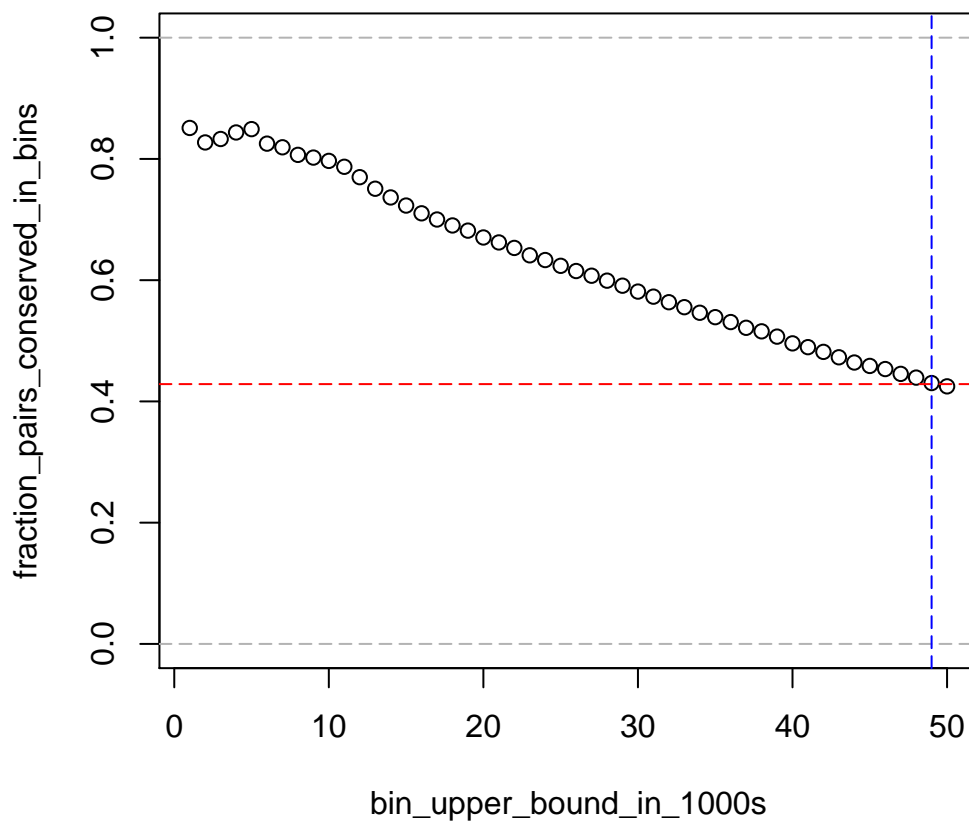

Supplement: s1 [file s1]

**Bin\_conservation\_minus\_bg\_Canal-1\_vs\_FR483**  
**PD-0.465691**

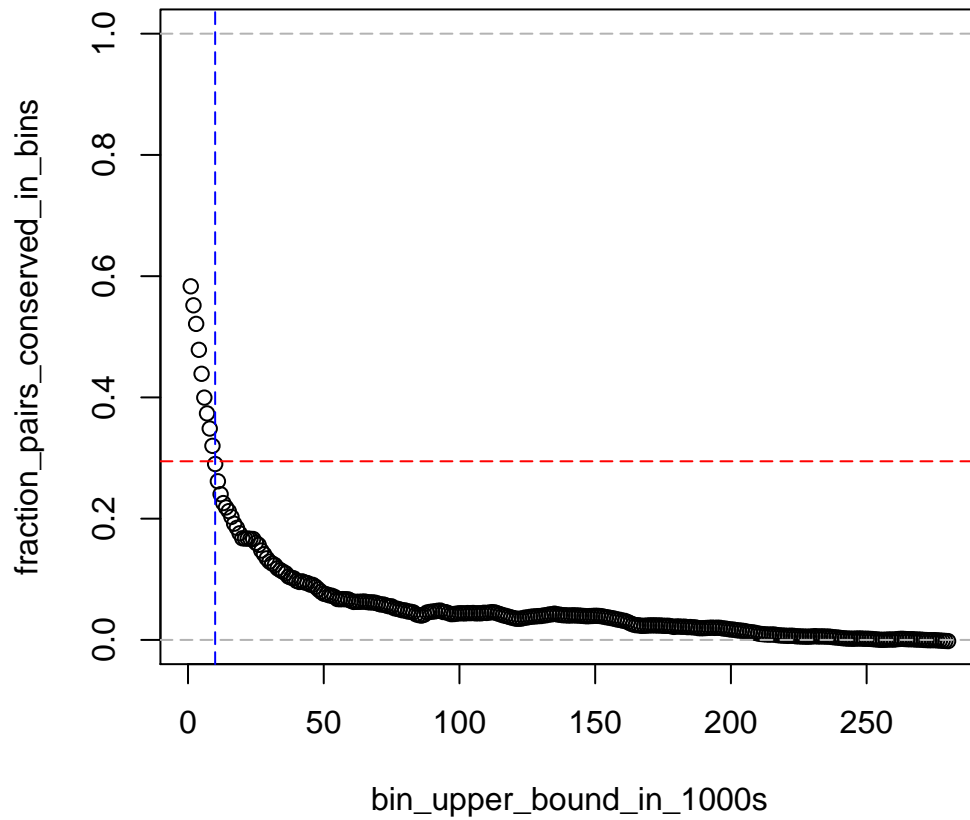

**Bin\_conservation\_minus\_bg\_Canal-1\_vs\_FR483**  
**PD-0.465691**

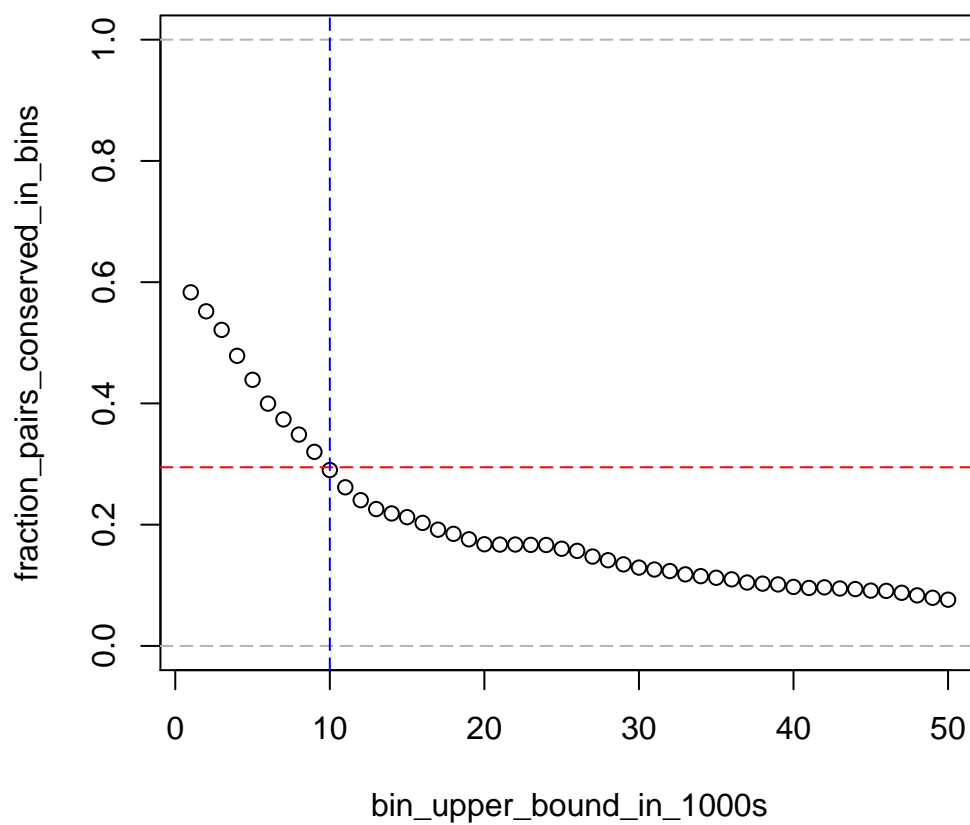

Supplement: s1 [file s1]

**Bin\_conservation\_minus\_bg\_Fr5L\_vs\_OR0704.3**  
**PD-0.459472**

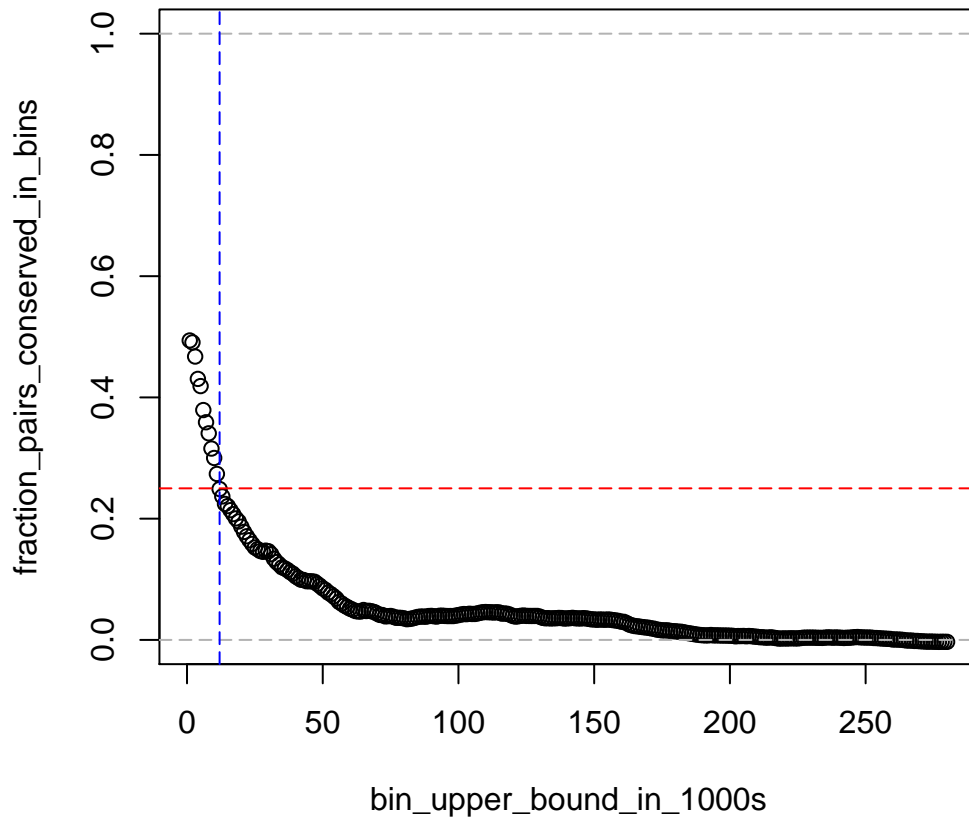

**Bin\_conservation\_minus\_bg\_Fr5L\_vs\_OR0704.3**  
**PD-0.459472**

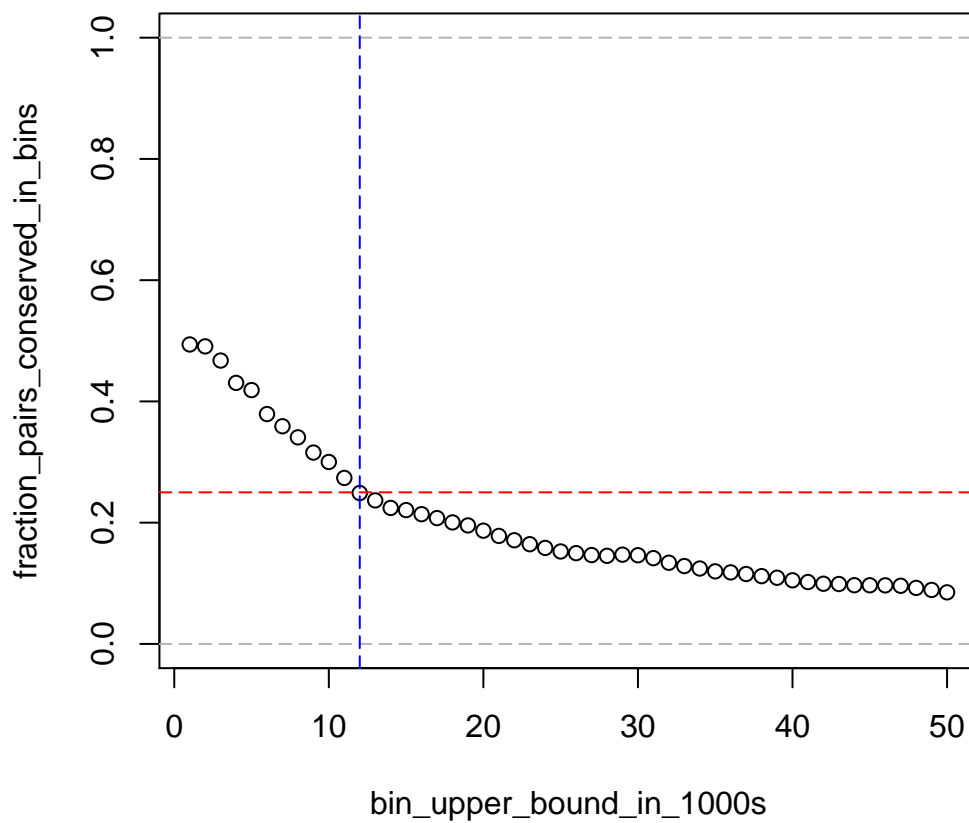

Supplement: s1 [file s1]

**Bin\_conservation\_minus\_bg\_Br0604L\_vs\_IL-3A**  
**PD-0.670456**

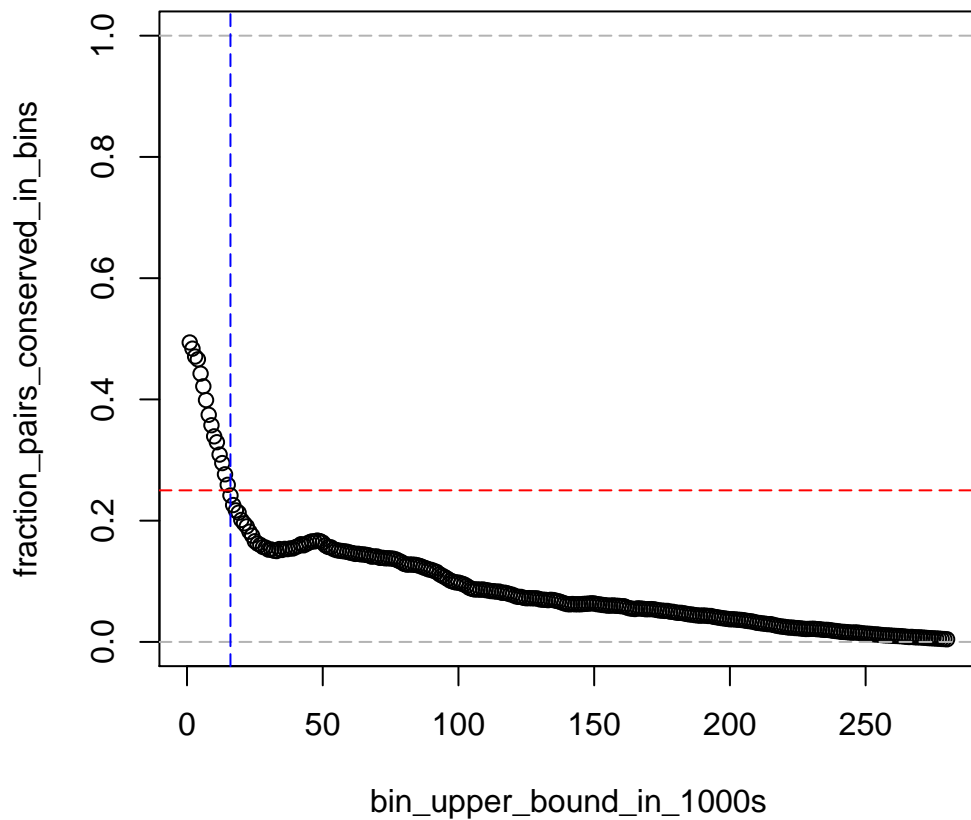

**Bin\_conservation\_minus\_bg\_Br0604L\_vs\_IL-3A**  
**PD-0.670456**

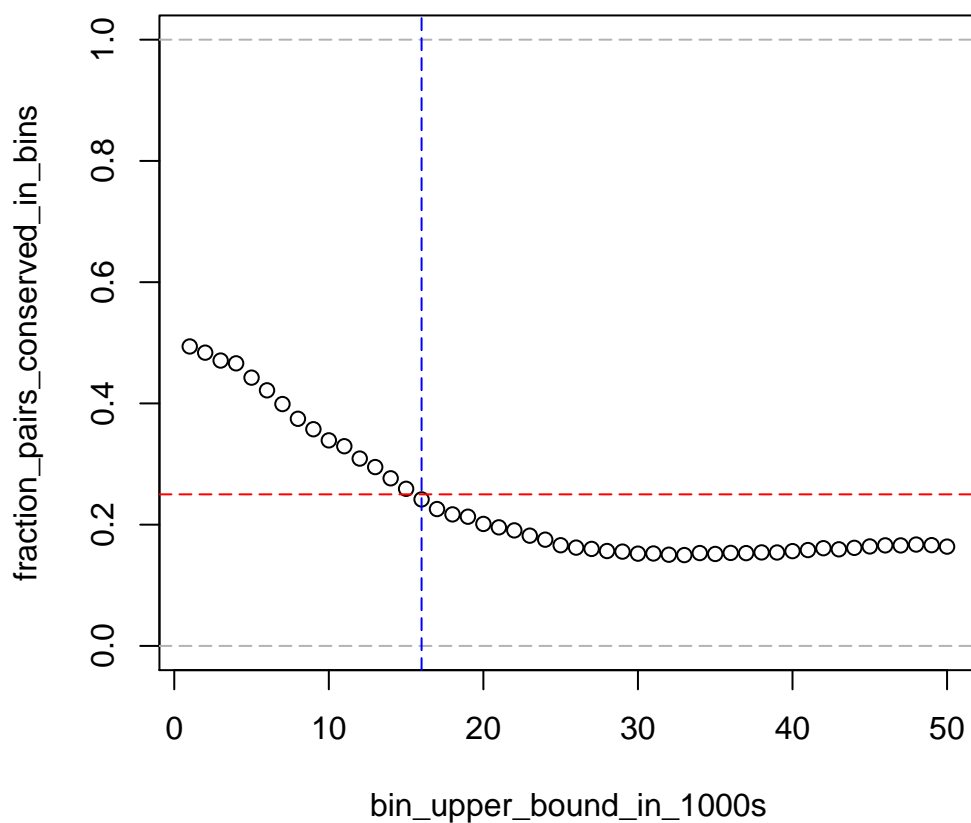

Supplement: s1 [file s1]

**Bin\_conservation\_minus\_bg\_CZ-2\_vs\_NYs-1**  
**PD-0.665584**

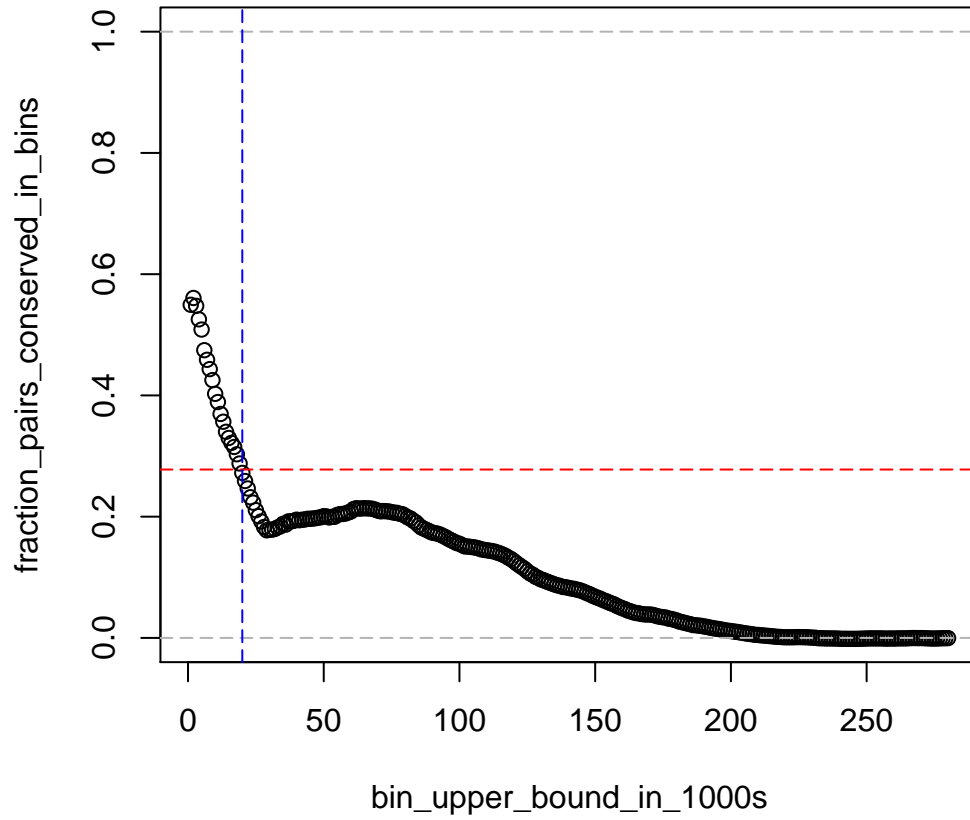

**Bin\_conservation\_minus\_bg\_CZ-2\_vs\_NYs-1**  
**PD-0.665584**

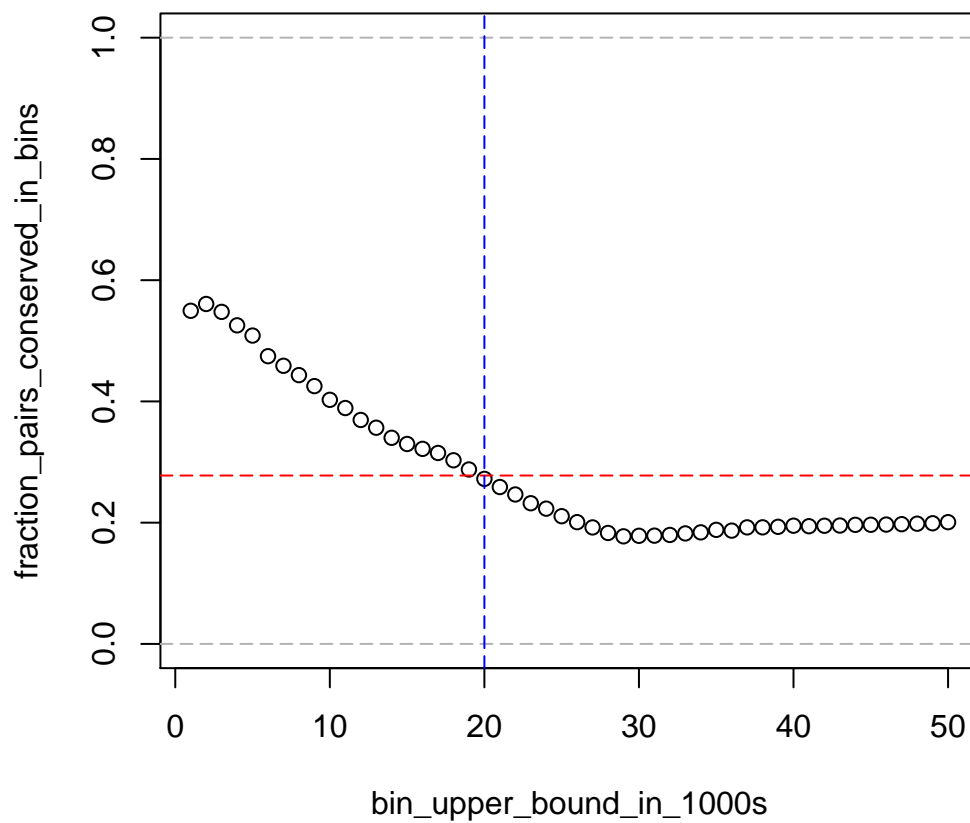

Supplement: s1 [file s1]

**Bin\_conservation\_minus\_bg\_ATCV1\_vs\_CVR-1**  
**PD-0.456961**

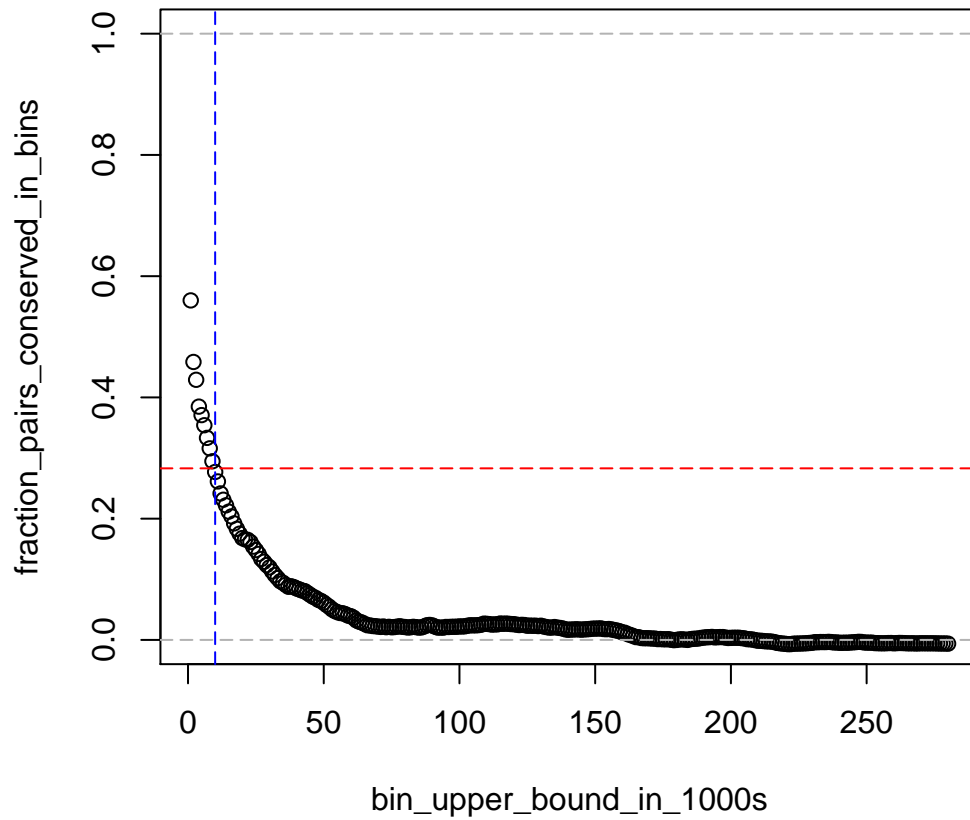

**Bin\_conservation\_minus\_bg\_ATCV1\_vs\_CVR-1**  
**PD-0.456961**

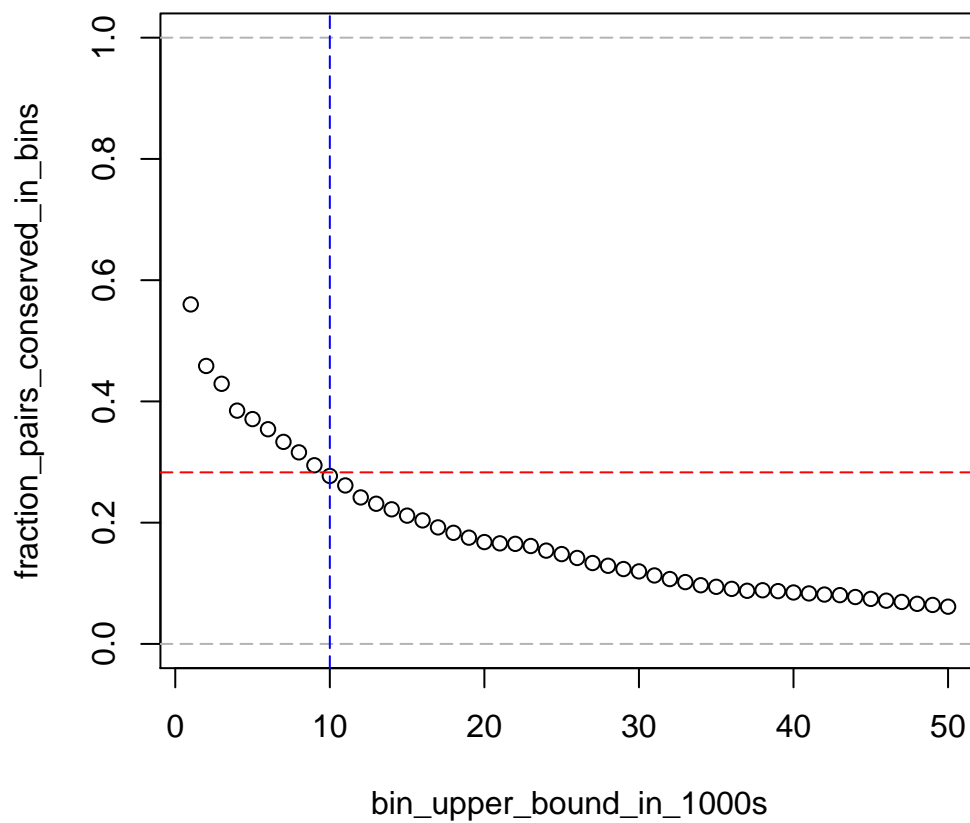

Supplement: s1 [file s1]

**Bin\_conservation\_minus\_bg\_AP110A\_vs\_MA-1E**  
**PD-0.655142**

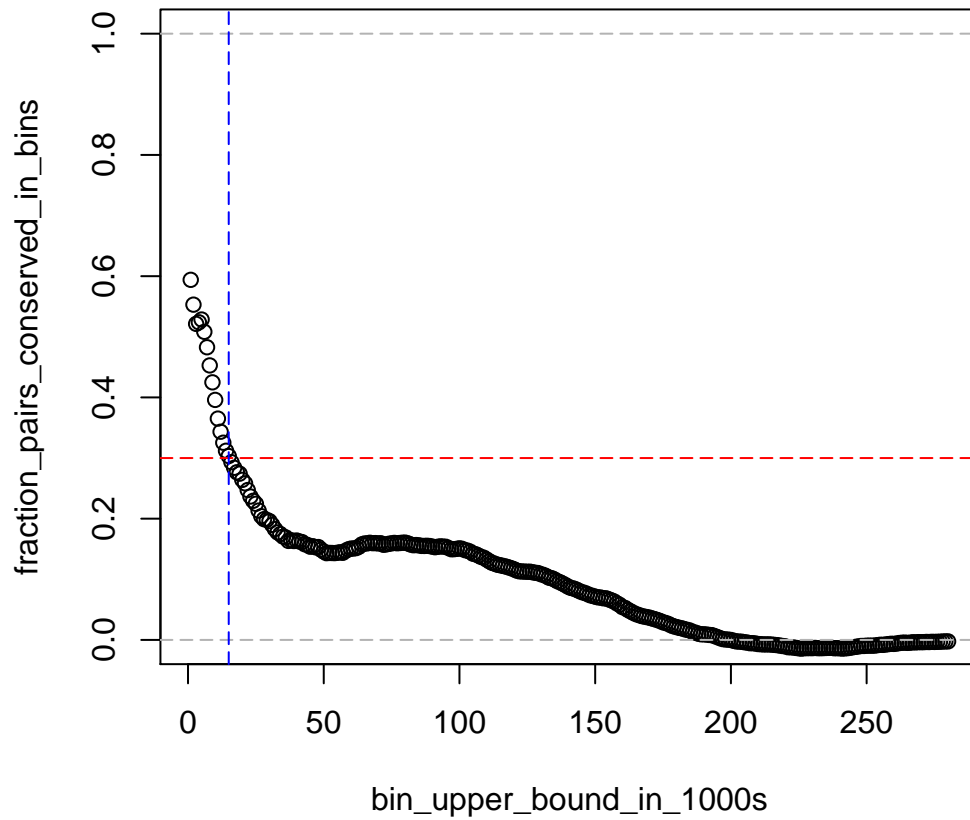

**Bin\_conservation\_minus\_bg\_AP110A\_vs\_MA-1E**  
**PD-0.655142**

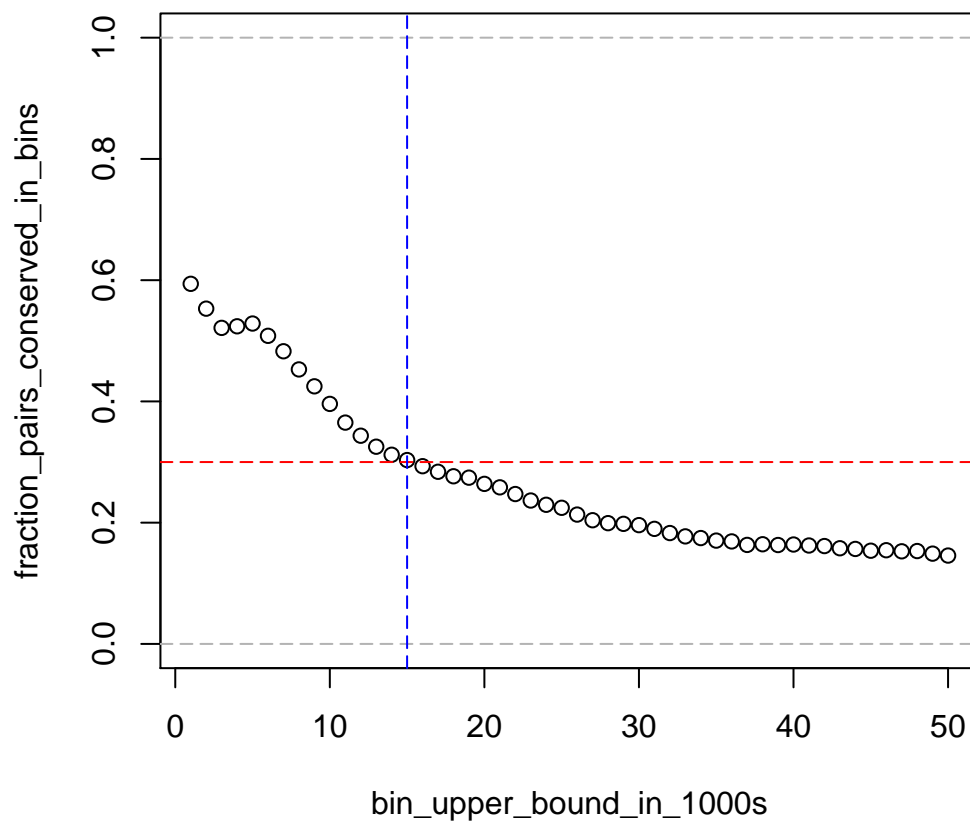

Supplement: s1 [file s1]

**Bin\_conservation\_minus\_bg\_CVA-1\_vs\_MA-1D**  
**PD-0.656356**

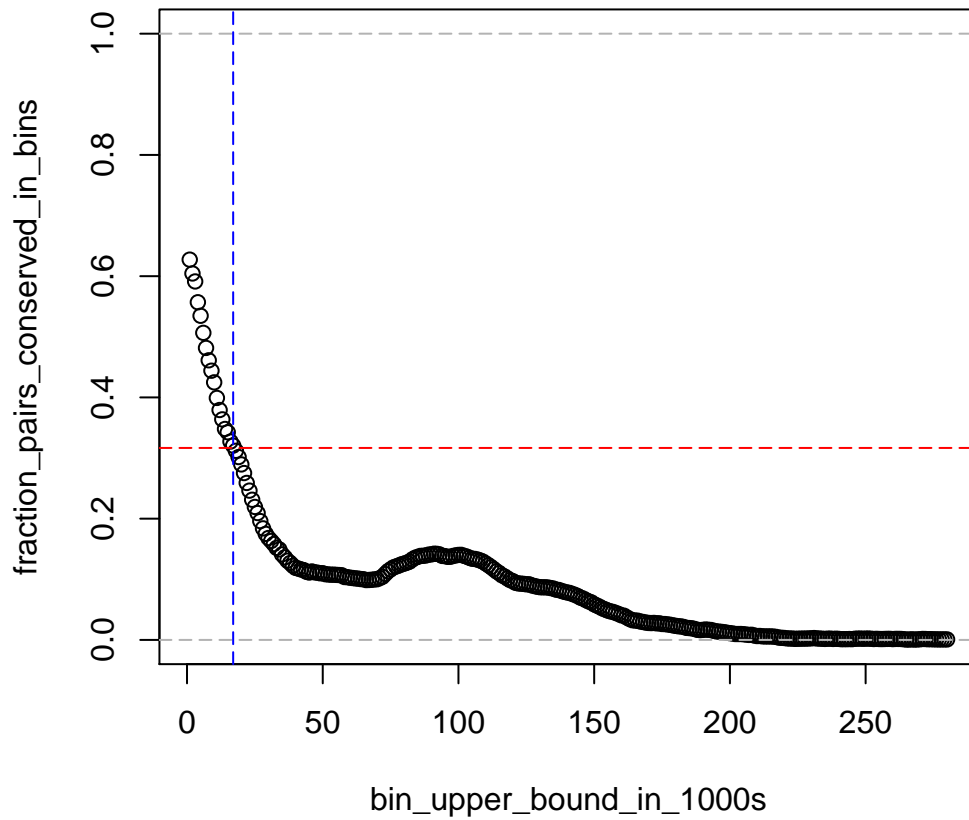

**Bin\_conservation\_minus\_bg\_CVA-1\_vs\_MA-1D**  
**PD-0.656356**

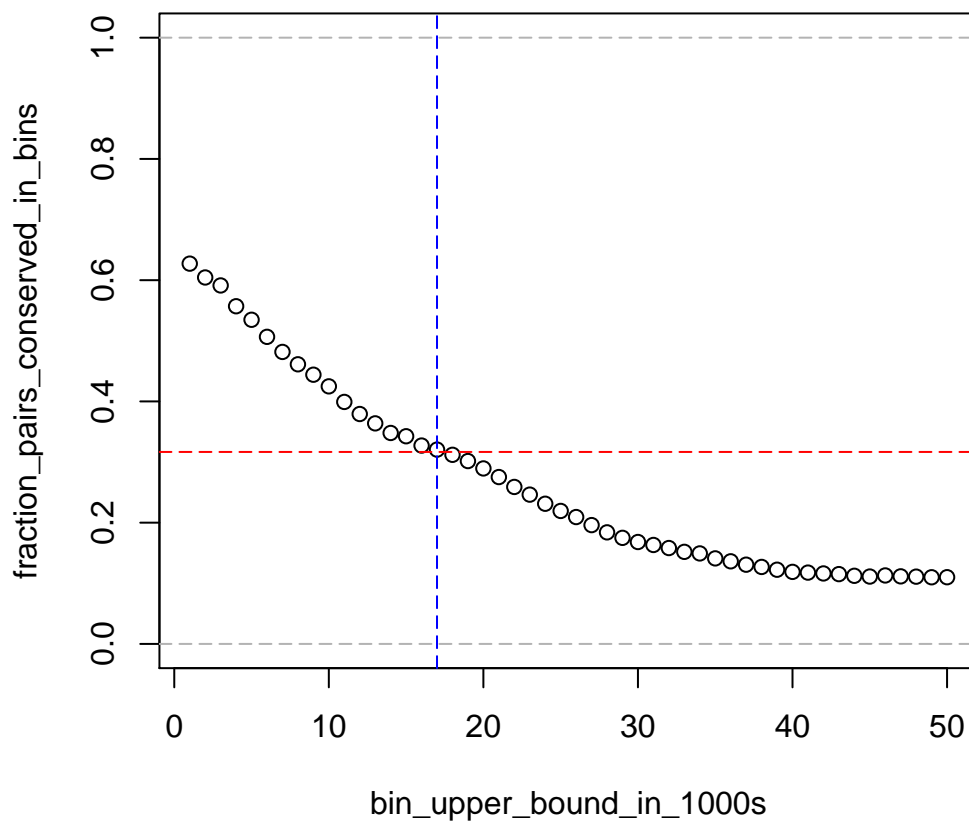

Supplement: s1 [file s1]

**Bin\_conservation\_minus\_bg\_CviKI\_vs\_KS1B**  
**PD-0.017259**

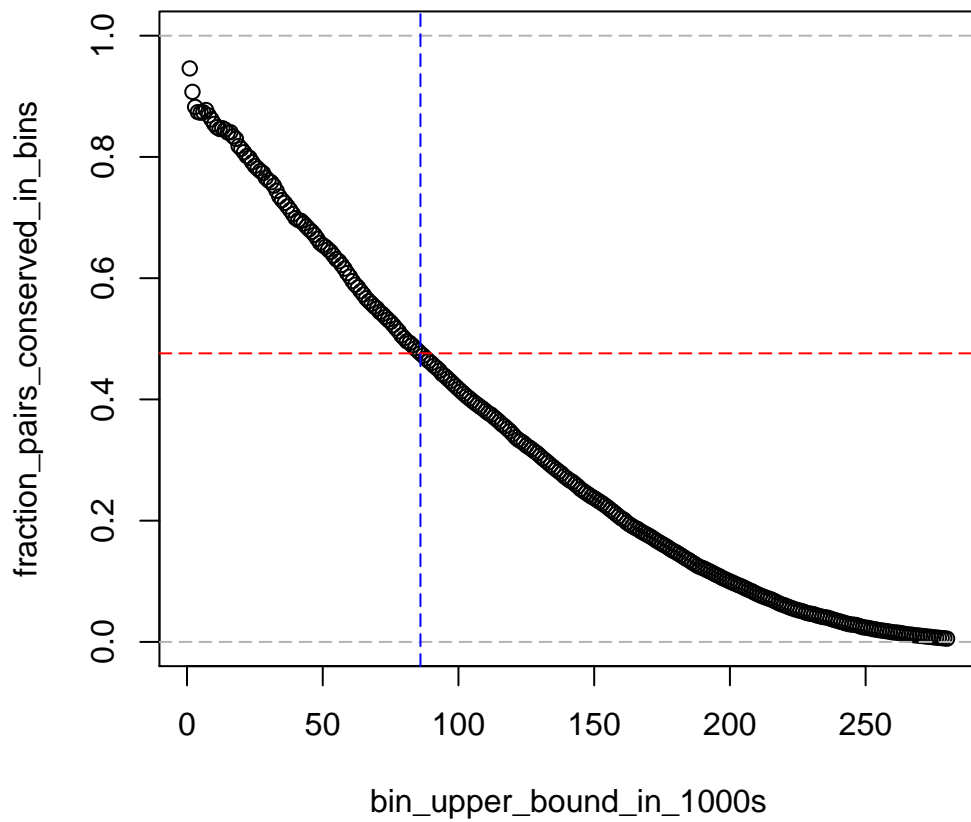

**Bin\_conservation\_minus\_bg\_CviKI\_vs\_KS1B**  
**PD-0.017259**

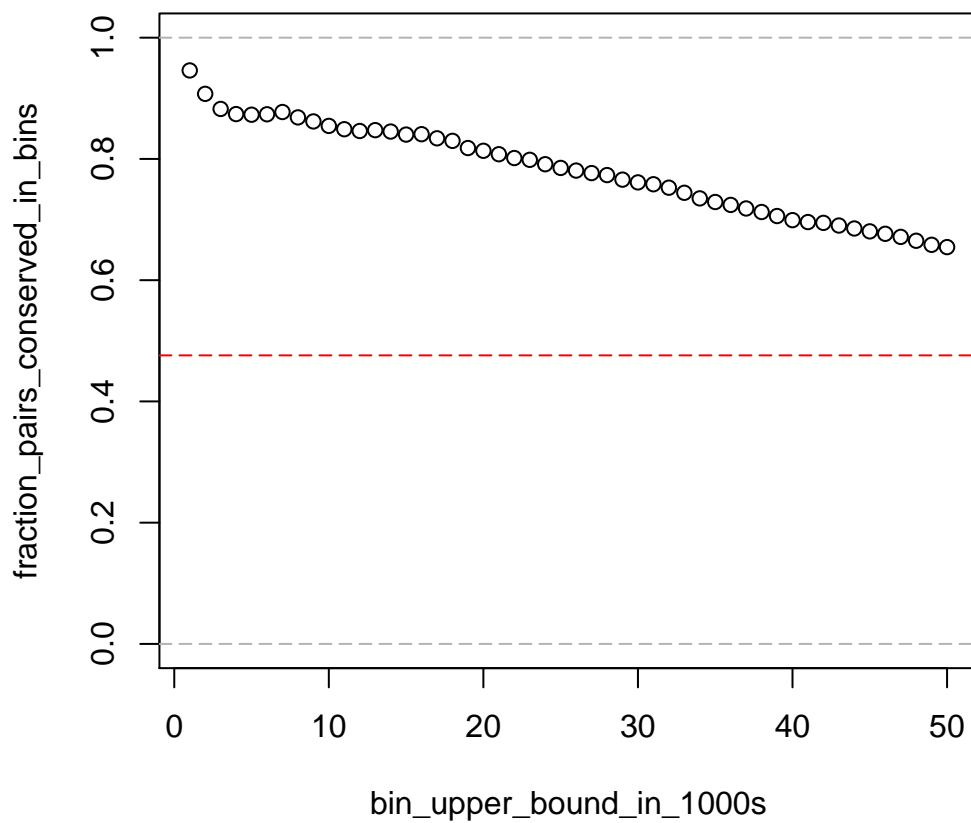

Supplement: s1 [file s1]

**Bin\_conservation\_minus\_bg\_ATCV1\_vs\_Br0604L**  
**PD-0.06073**

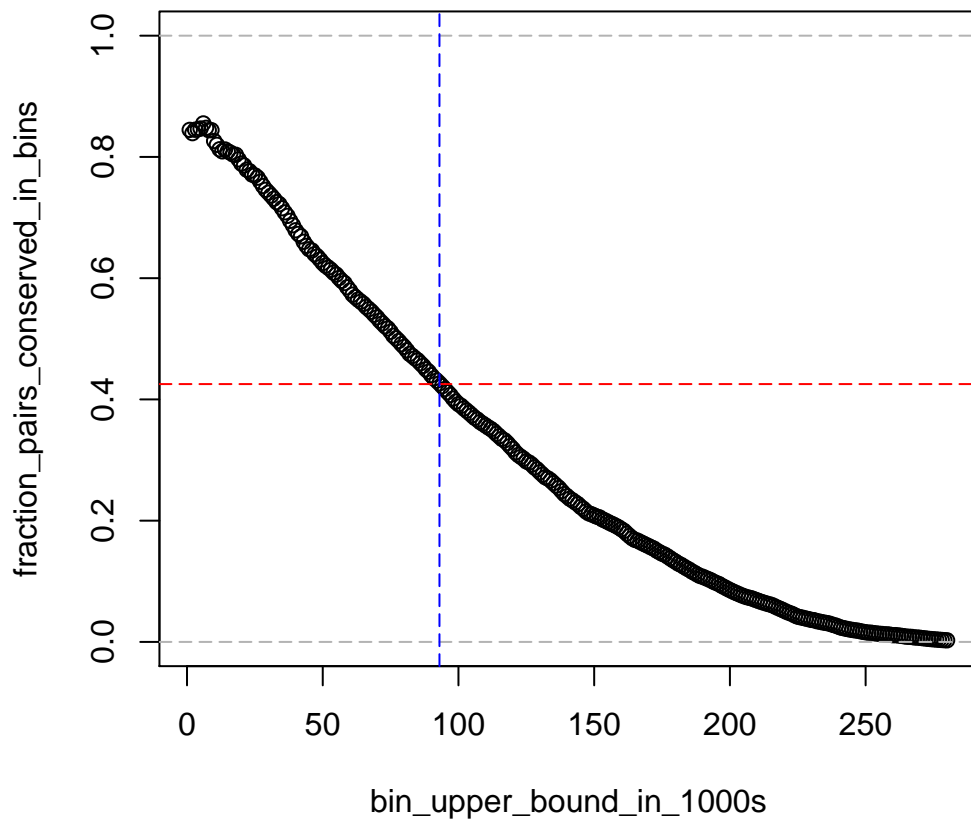

**Bin\_conservation\_minus\_bg\_ATCV1\_vs\_Br0604L**  
**PD-0.06073**

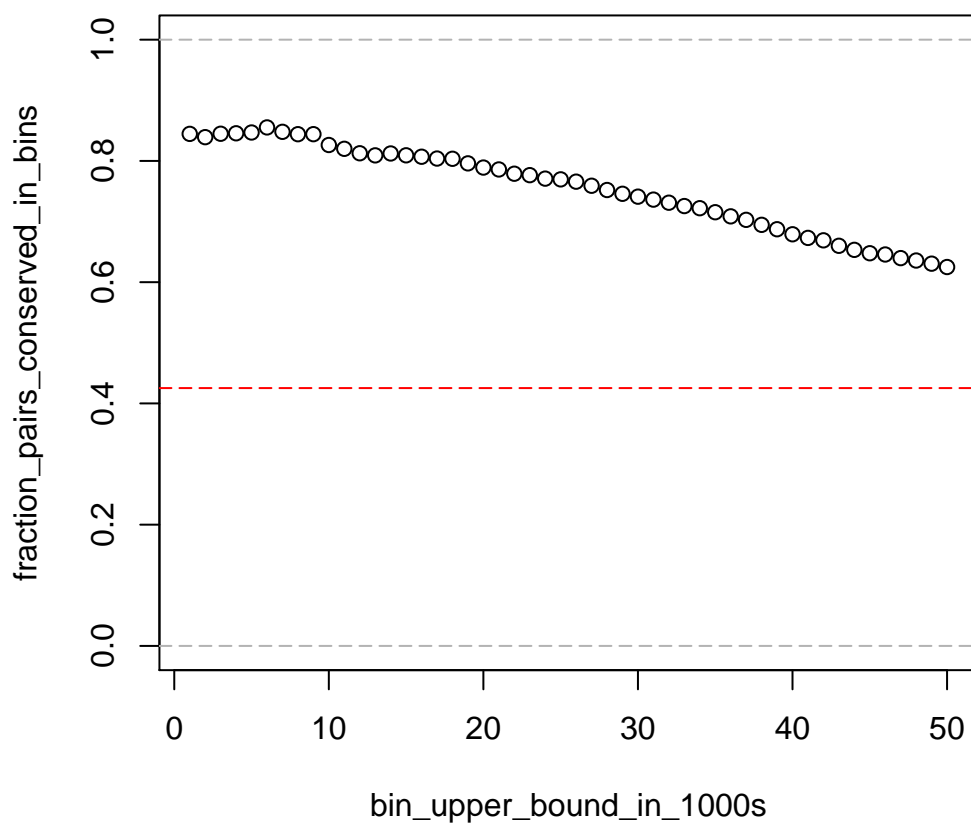

Supplement: s1 [file s1]

**Bin\_conservation\_minus\_bg\_NE-JV-4\_vs\_PBCV1**  
**PD-0.018105**

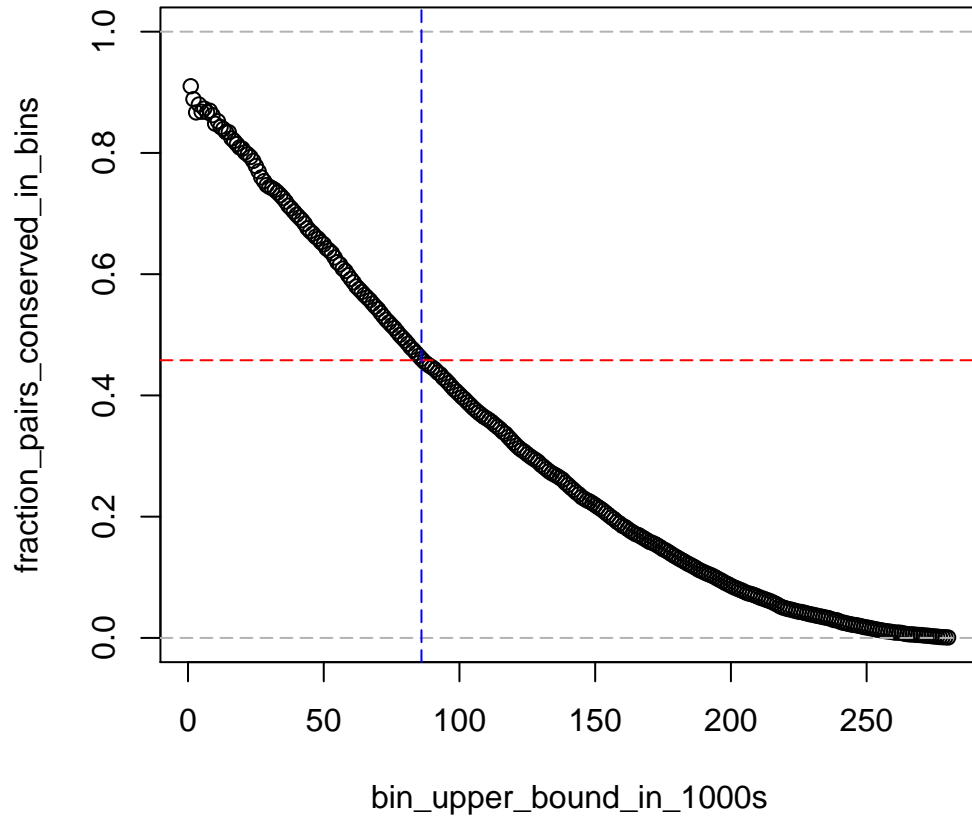

**Bin\_conservation\_minus\_bg\_NE-JV-4\_vs\_PBCV1**  
**PD-0.018105**

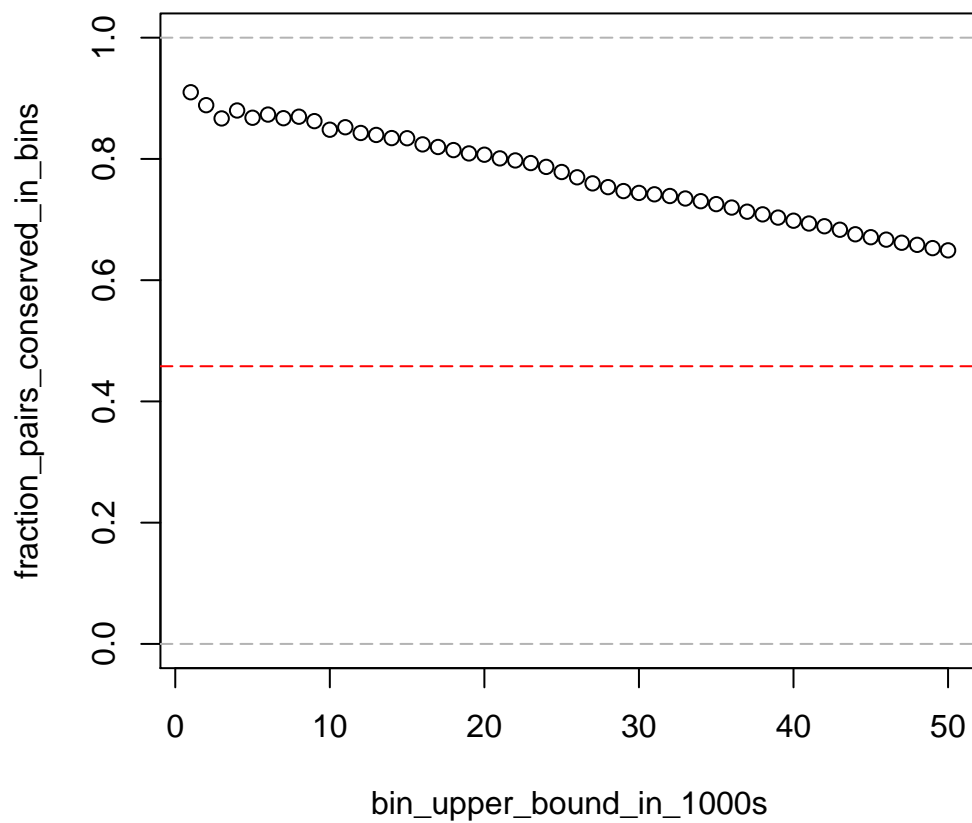

Supplement: s1 [file s1]

**Bin\_conservation\_minus\_bg\_CVB-1\_vs\_NYs-1**  
**PD-0.676442**

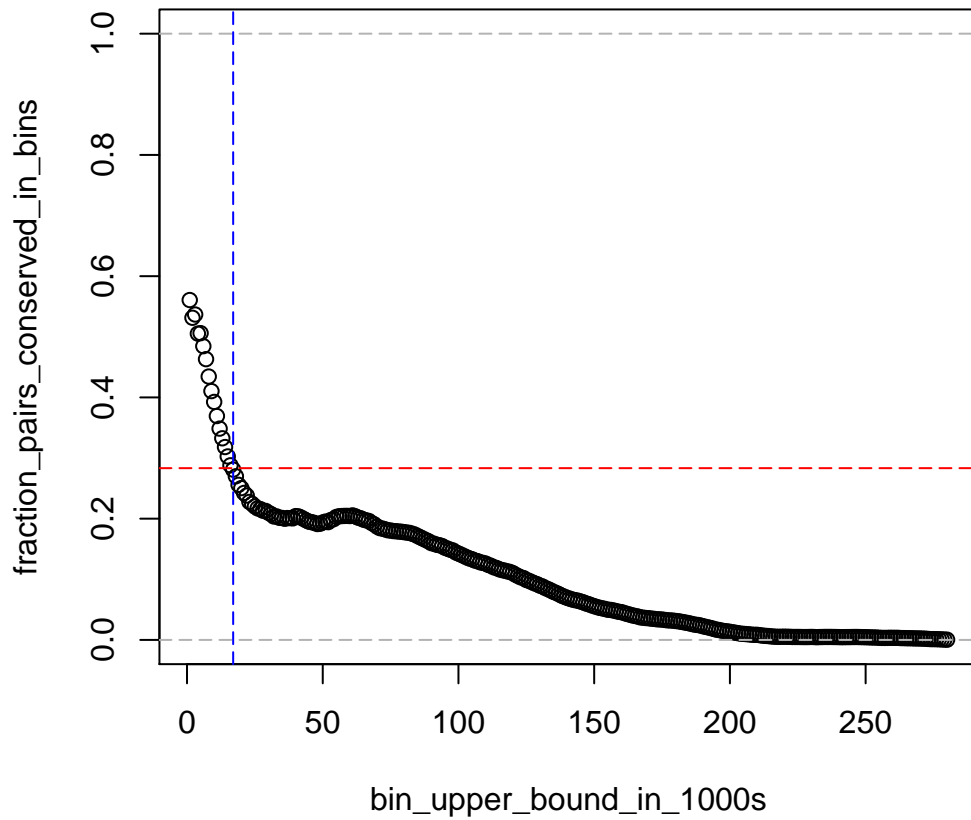

**Bin\_conservation\_minus\_bg\_CVB-1\_vs\_NYs-1**  
**PD-0.676442**

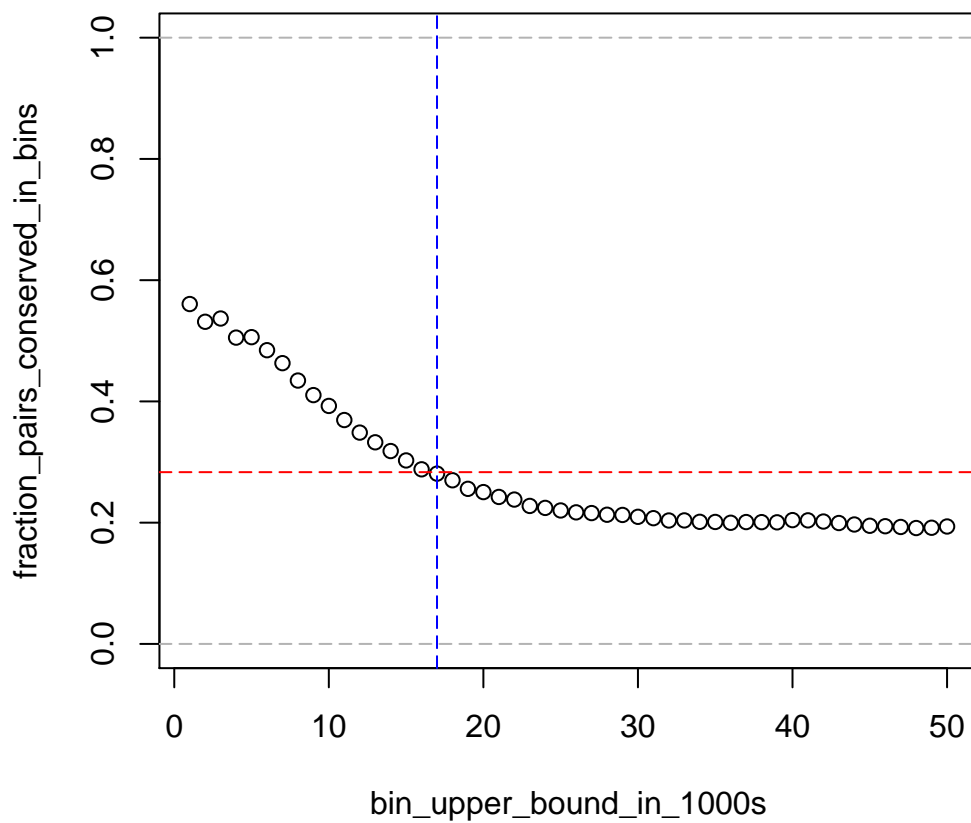

Supplement: s1 [file s1]

**Bin\_conservation\_minus\_bg\_NE-JV-3\_vs\_WI0606**  
**PD-0.009245**

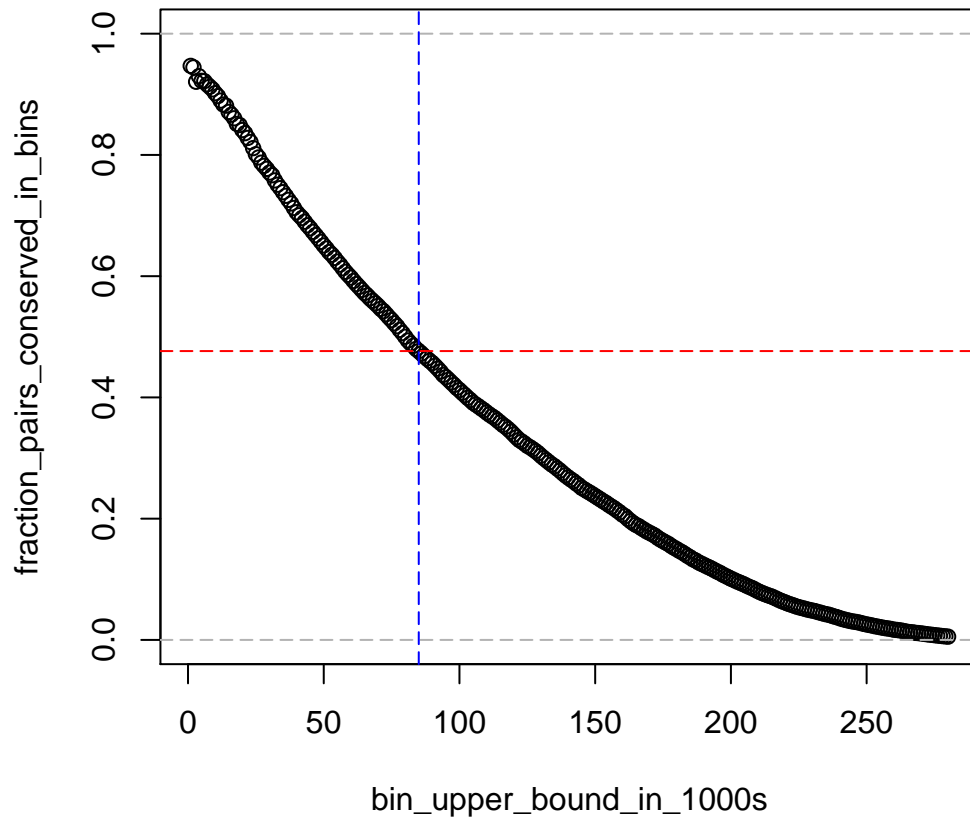

**Bin\_conservation\_minus\_bg\_NE-JV-3\_vs\_WI0606**  
**PD-0.009245**

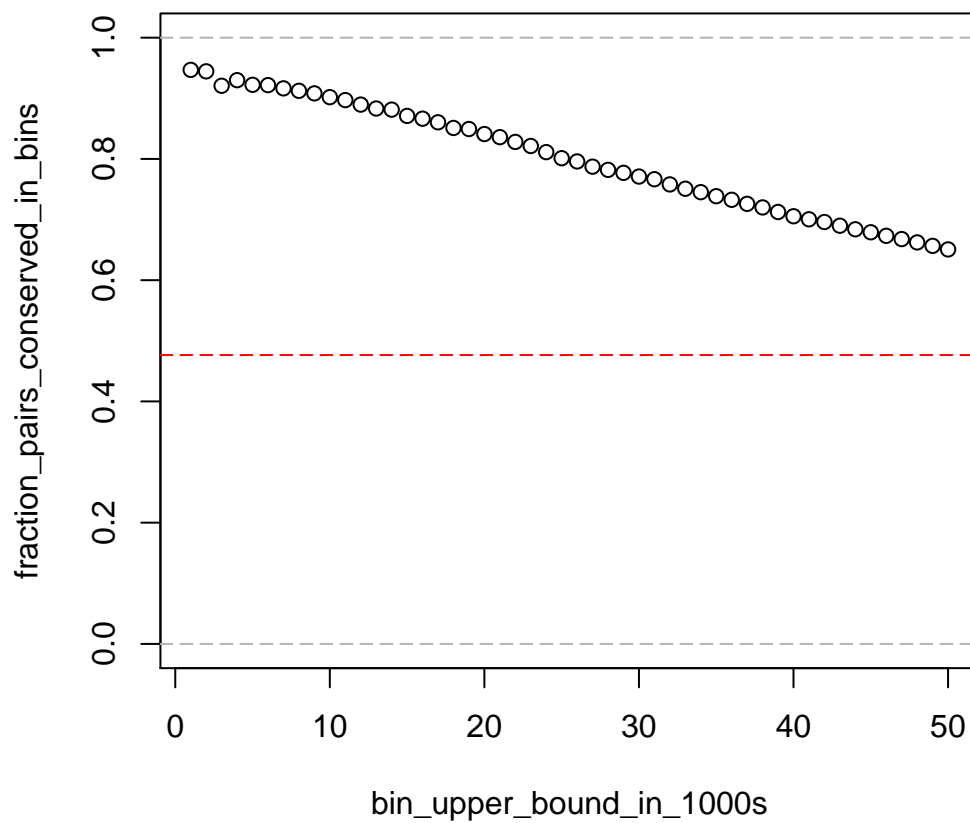

Supplement: s1 [file s1]

**Bin\_conservation\_minus\_bg\_CVG-1\_vs\_MN0810.1**  
**PD-0.459578**

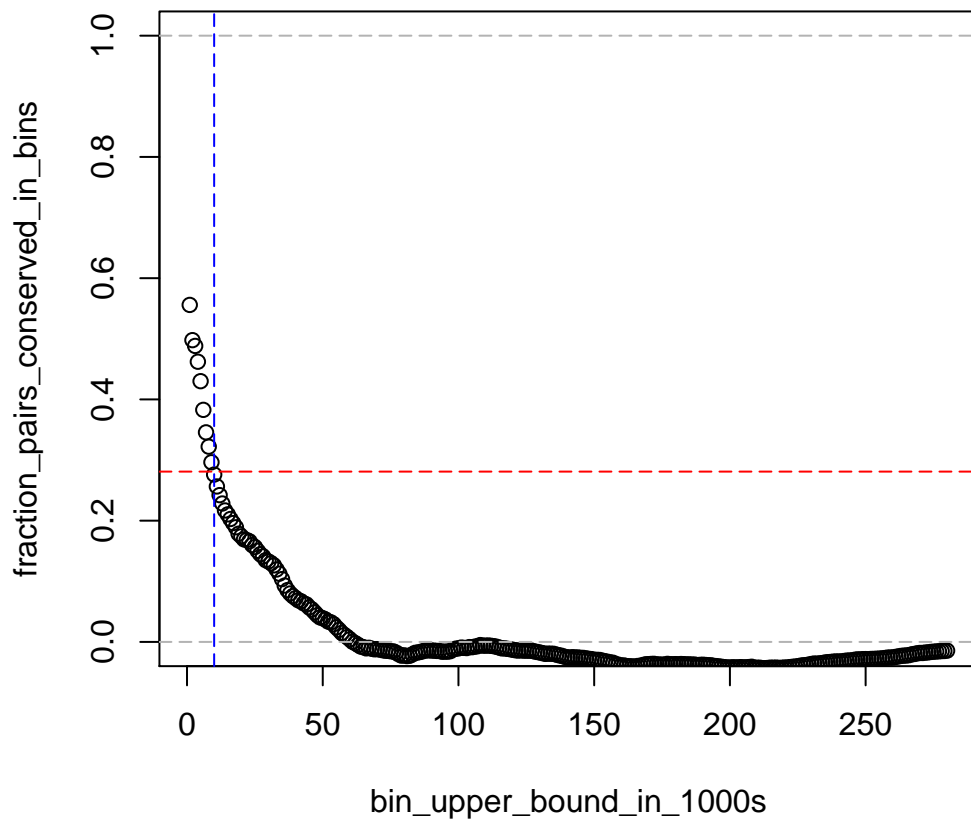

**Bin\_conservation\_minus\_bg\_CVG-1\_vs\_MN0810.1**  
**PD-0.459578**

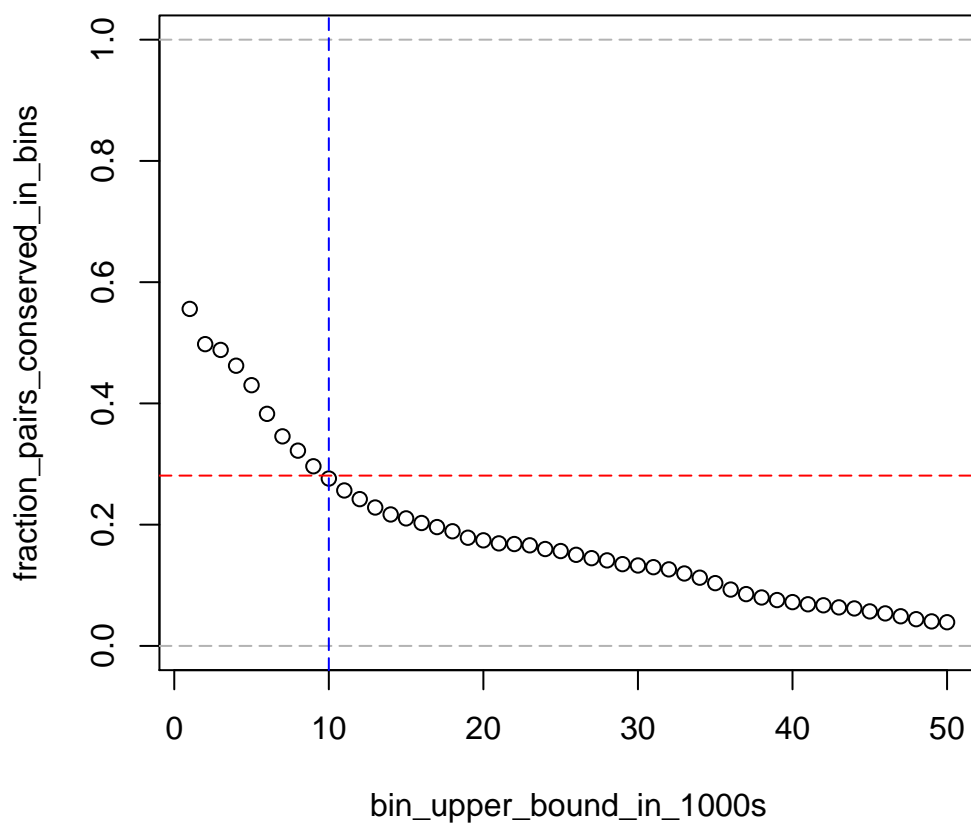

Supplement: s1 [file s1]

**Bin\_conservation\_minus\_bg\_CVB-1\_vs\_NW665.2**  
**PD-0.031427**

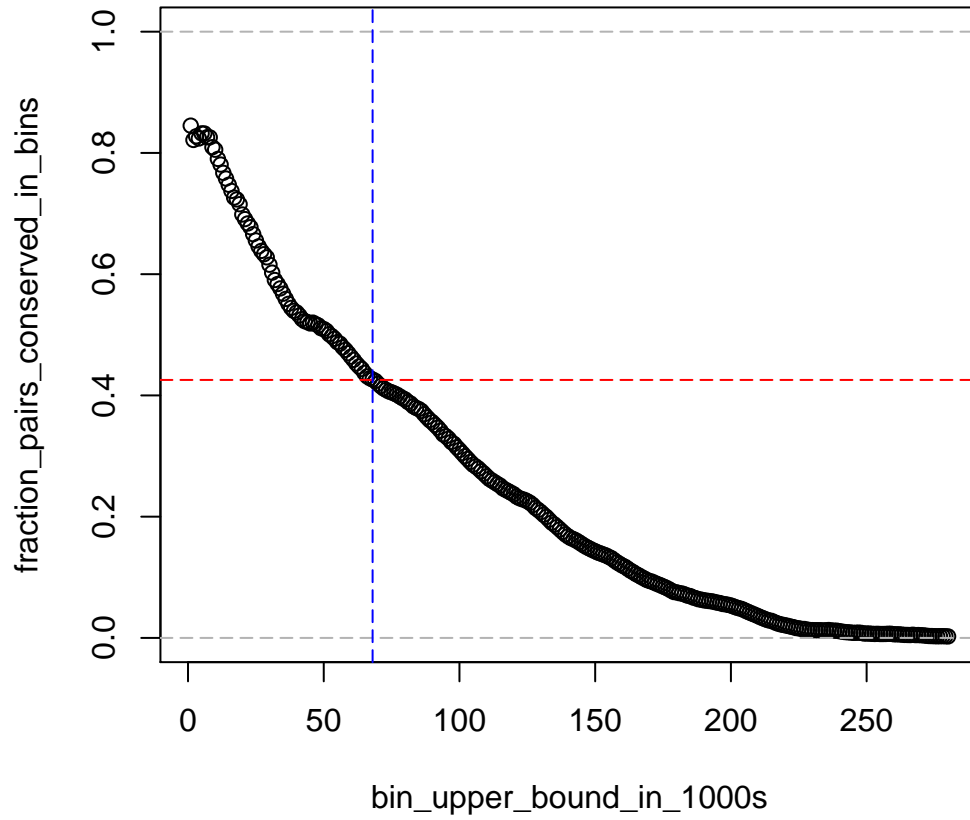

**Bin\_conservation\_minus\_bg\_CVB-1\_vs\_NW665.2**  
**PD-0.031427**

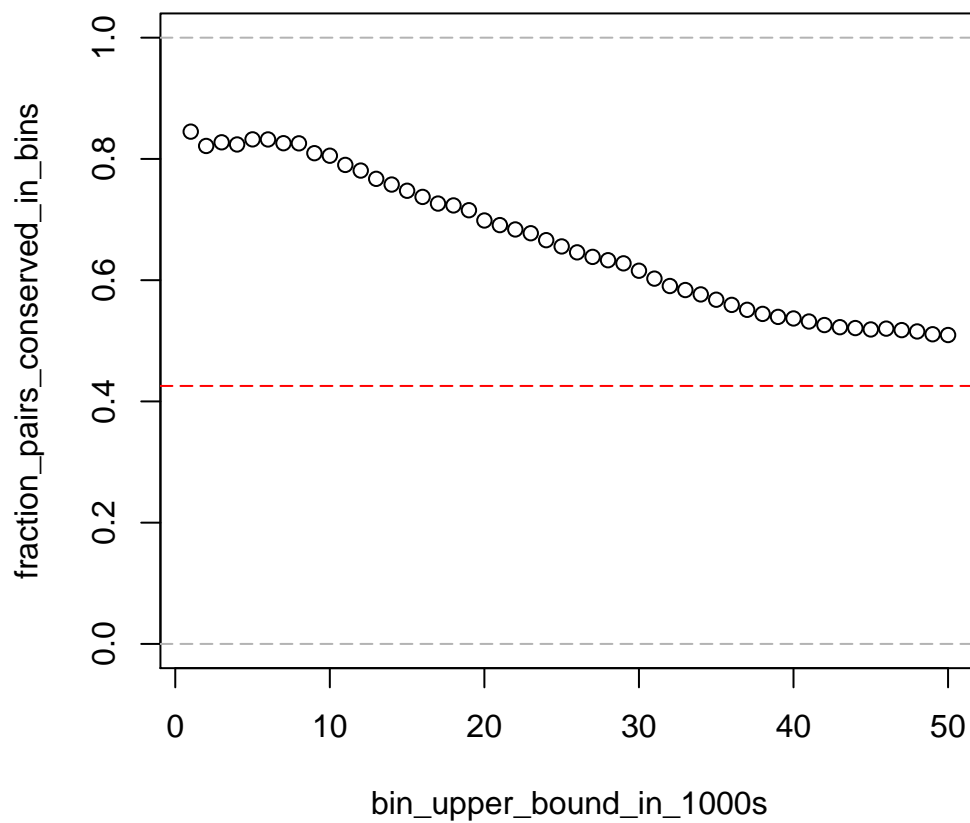

Supplement: s1 [file s1]

**Bin\_conservation\_minus\_bg\_MA-1D\_vs\_NE-JV-4**  
**PD-0.133181**

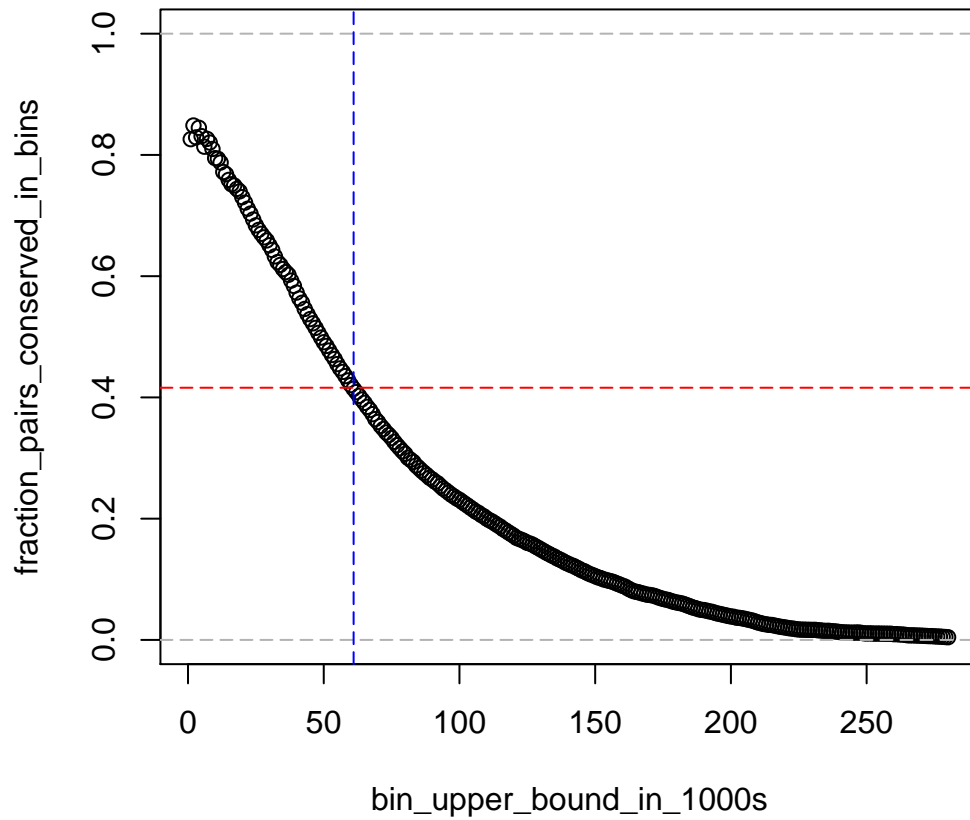

**Bin\_conservation\_minus\_bg\_MA-1D\_vs\_NE-JV-4**  
**PD-0.133181**

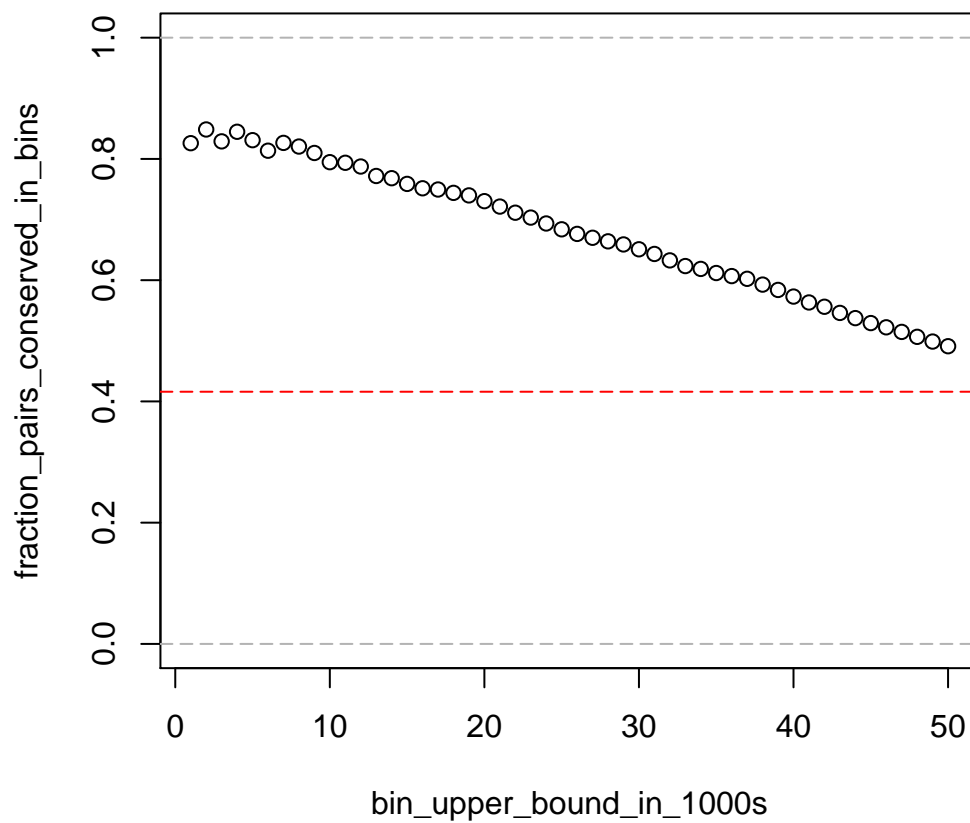

Supplement: s1 [file s1]

**Bin\_conservation\_minus\_bg\_Can0610SP\_vs\_MT325**  
**PD-0.45927**

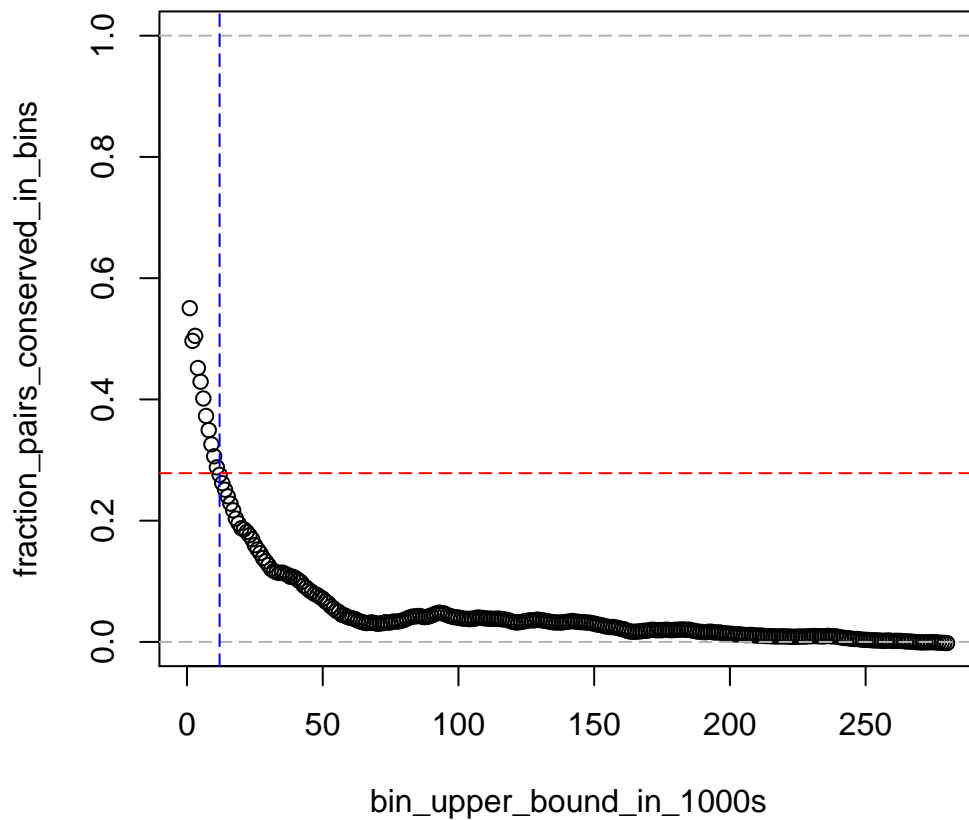

**Bin\_conservation\_minus\_bg\_Can0610SP\_vs\_MT325**  
**PD-0.45927**

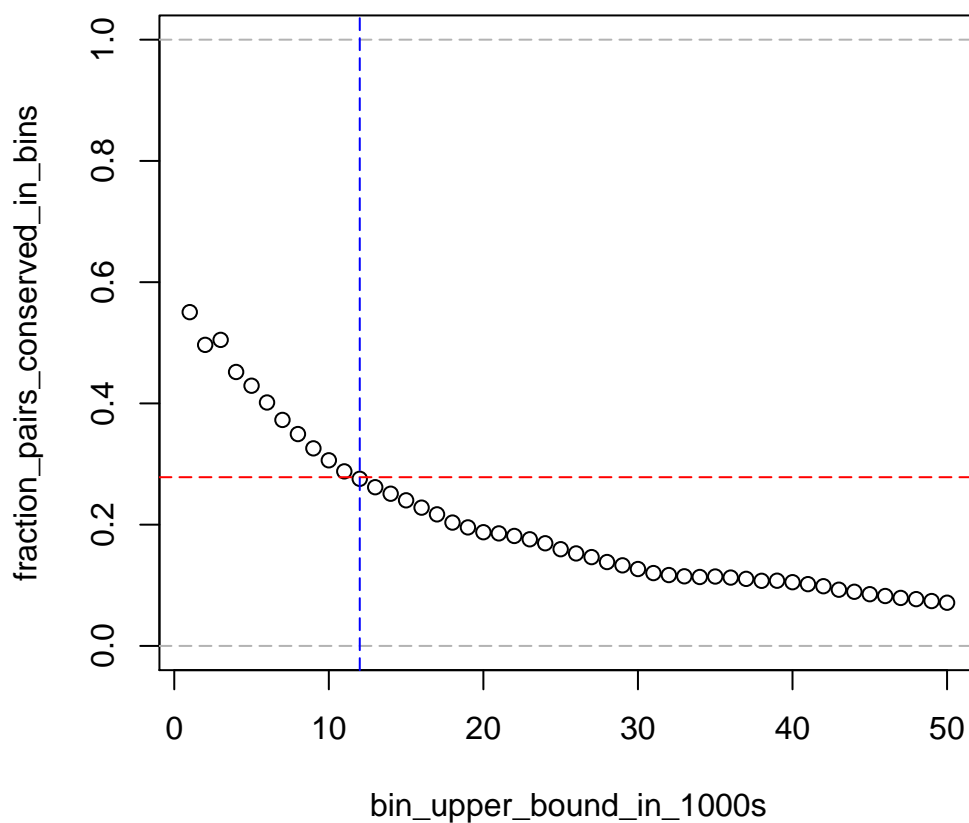

Supplement: s1 [file s1]

**Bin\_conservation\_minus\_bg\_Fr5L\_vs\_MO0605SPH**  
**PD-0.462731**

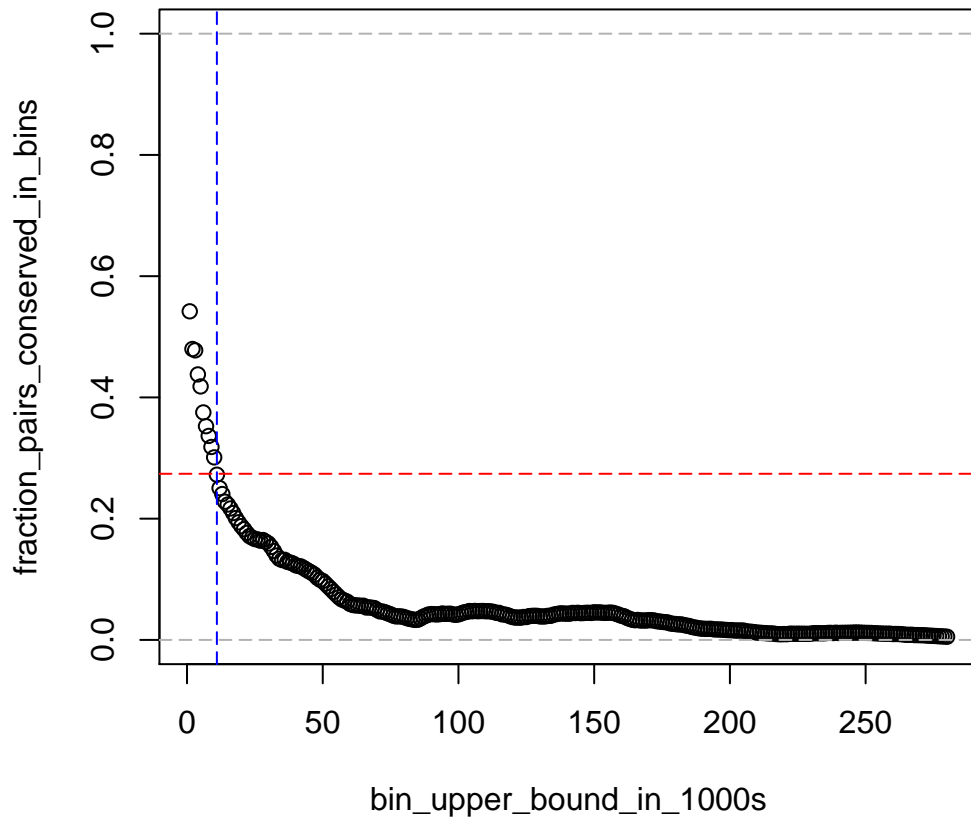

**Bin\_conservation\_minus\_bg\_Fr5L\_vs\_MO0605SPH**  
**PD-0.462731**

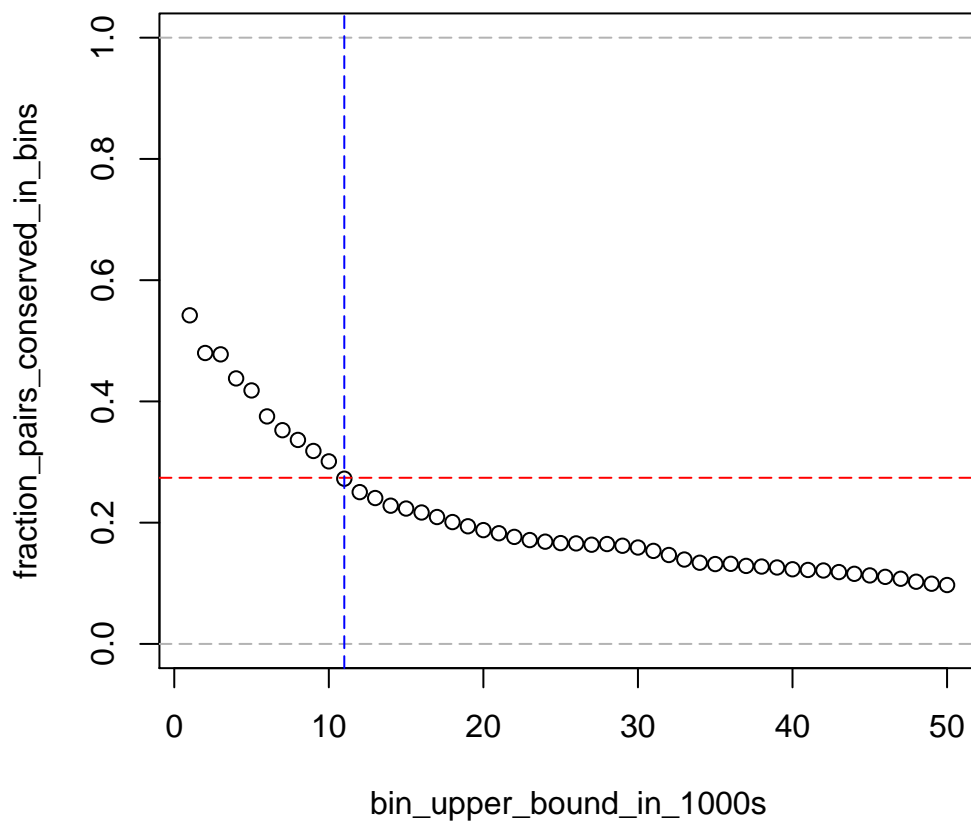

Supplement: s1 [file s1]

**Bin\_conservation\_minus\_bg\_MA-1D\_vs\_NE-JV-3**  
**PD-0.701427**

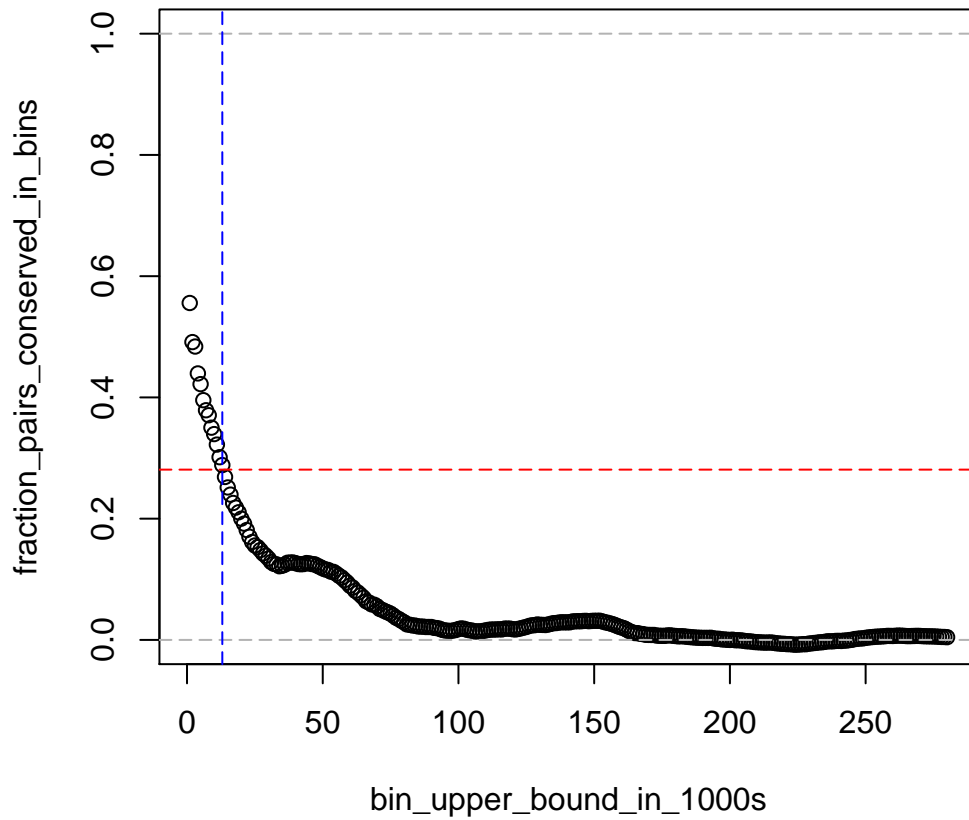

**Bin\_conservation\_minus\_bg\_MA-1D\_vs\_NE-JV-3**  
**PD-0.701427**

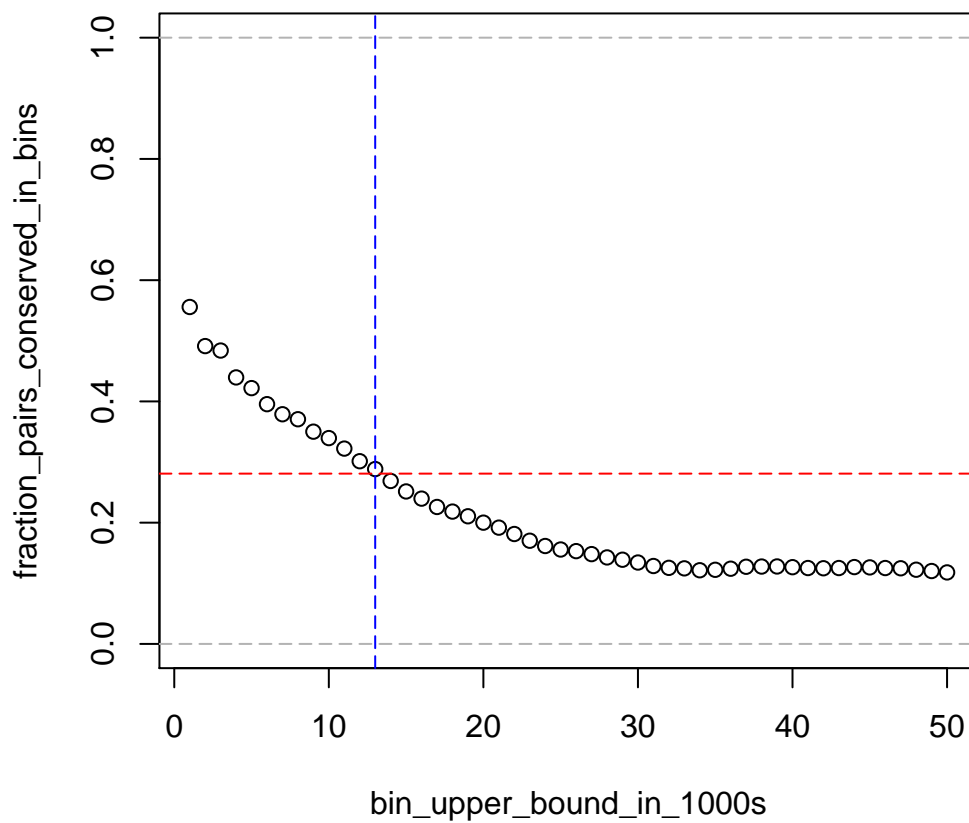

Supplement: s1 [file s1]

**Bin\_conservation\_minus\_bg\_CVB-1\_vs\_MA-1D**  
**PD-0.67463**

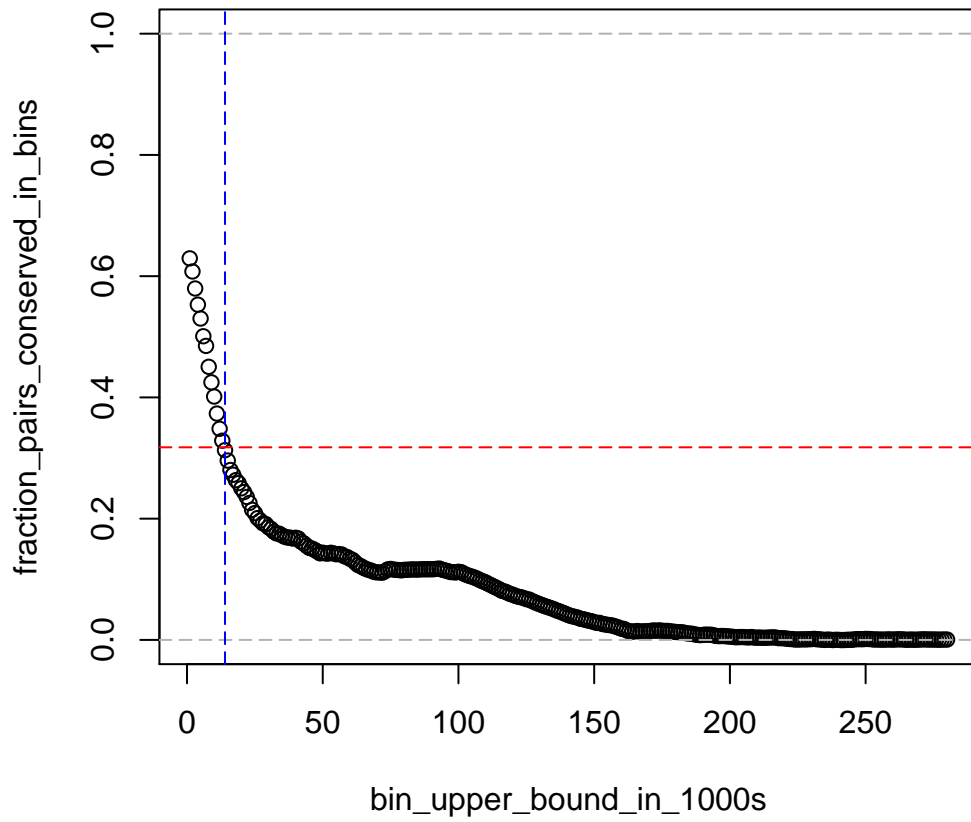

**Bin\_conservation\_minus\_bg\_CVB-1\_vs\_MA-1D**  
**PD-0.67463**

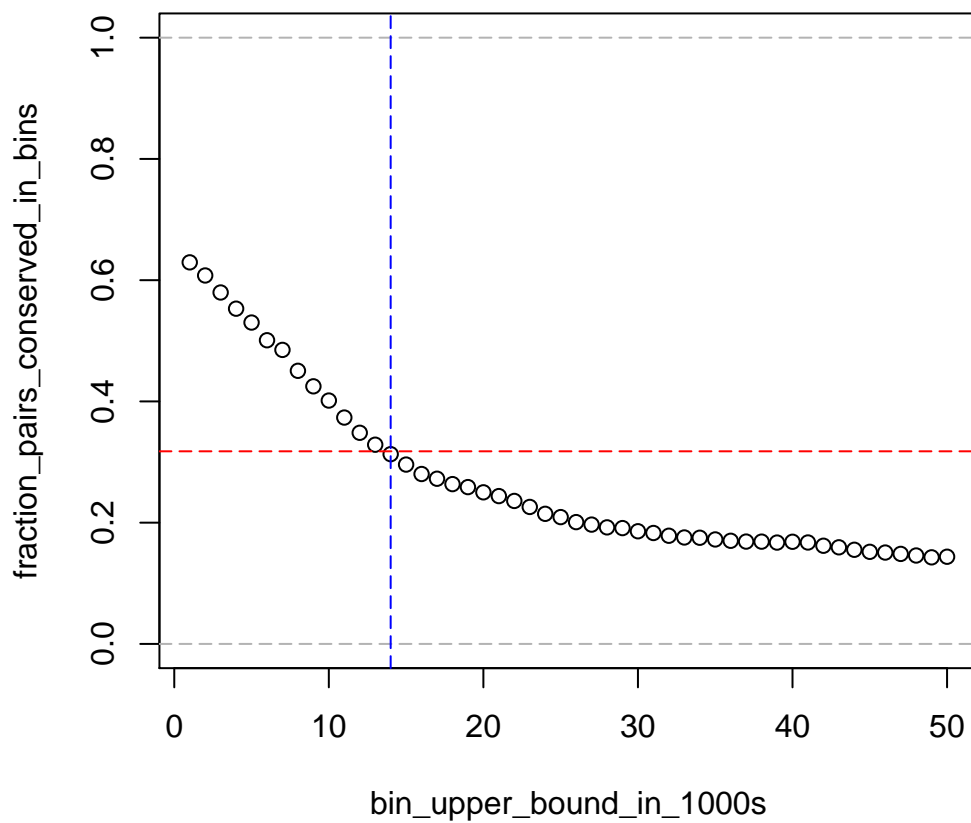

Supplement: s1 [file s1]

**Bin\_conservation\_minus\_bg\_GM0701.1\_vs\_MA-1E**  
**PD-0.684391**

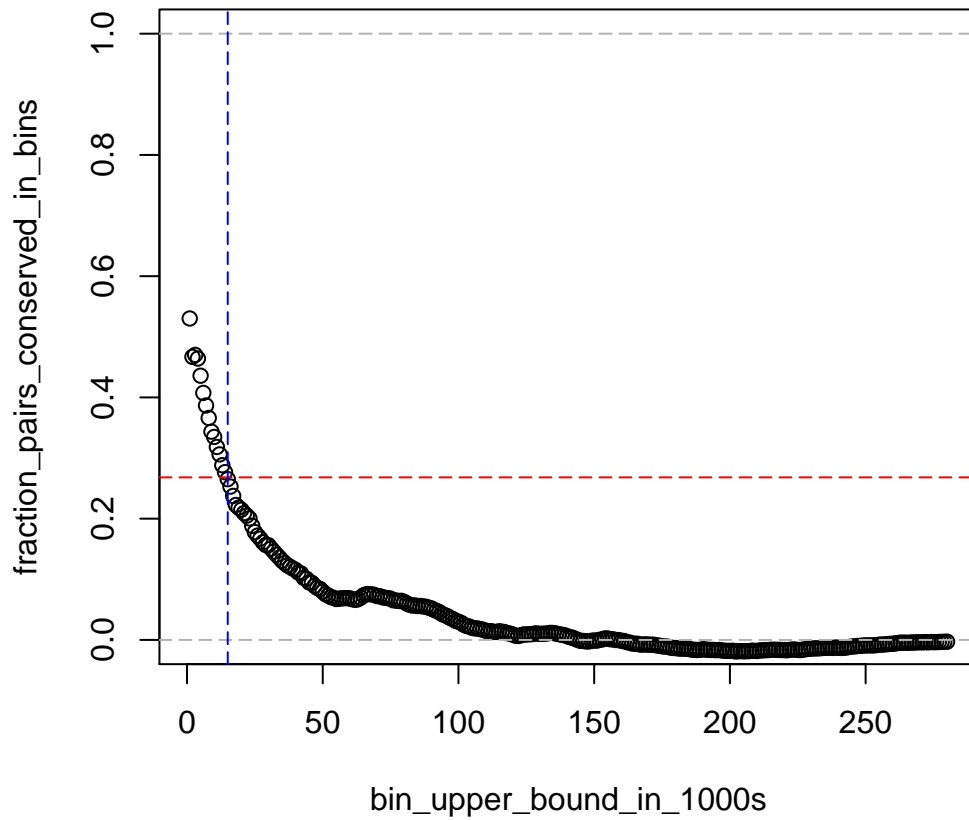

**Bin\_conservation\_minus\_bg\_GM0701.1\_vs\_MA-1E**  
**PD-0.684391**

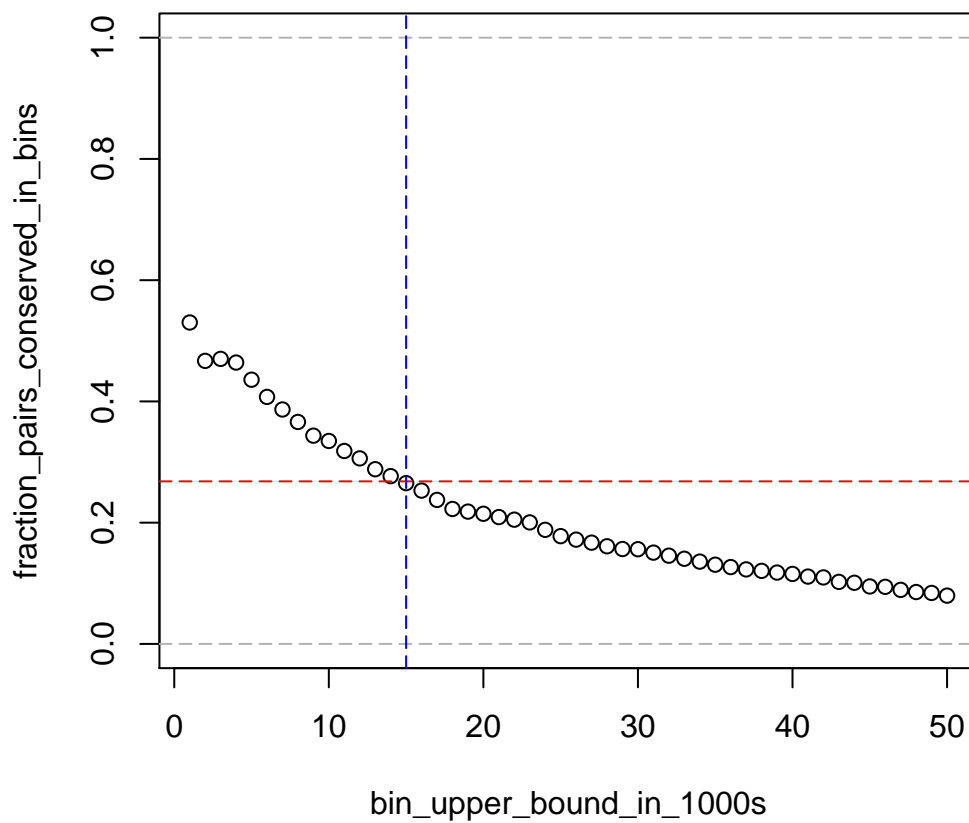

Supplement: s1 [file s1]

**Bin\_conservation\_minus\_bg\_Can0610SP\_vs\_KS1B**  
**PD-0.69363**

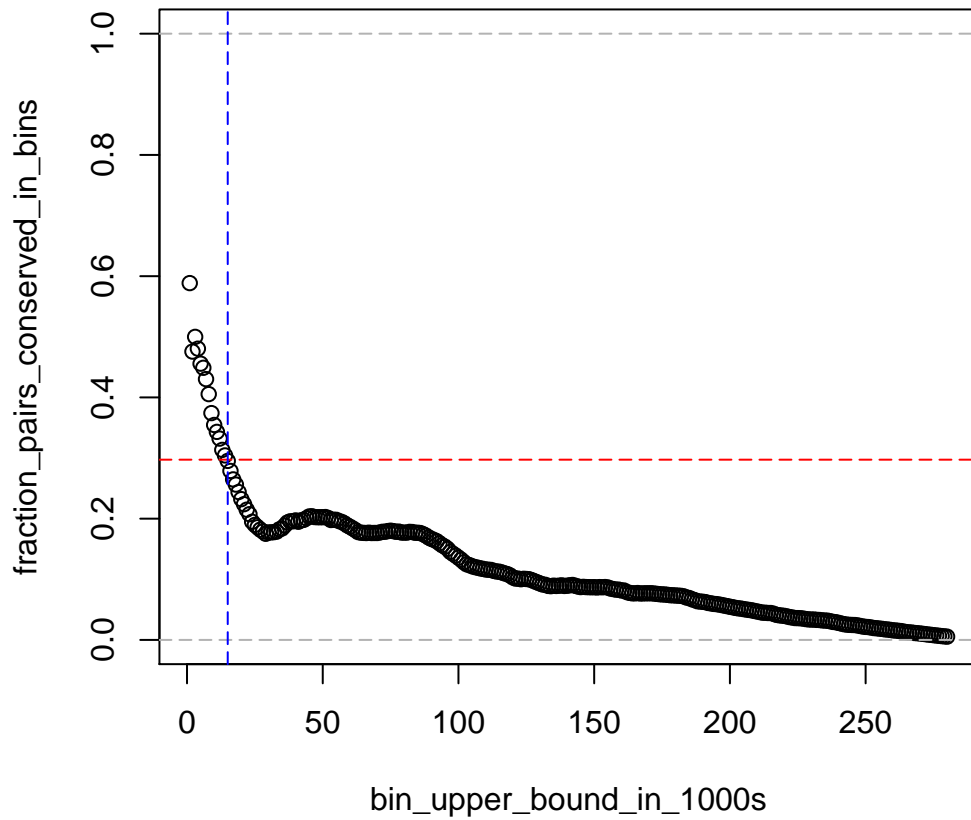

**Bin\_conservation\_minus\_bg\_Can0610SP\_vs\_KS1B**  
**PD-0.69363**

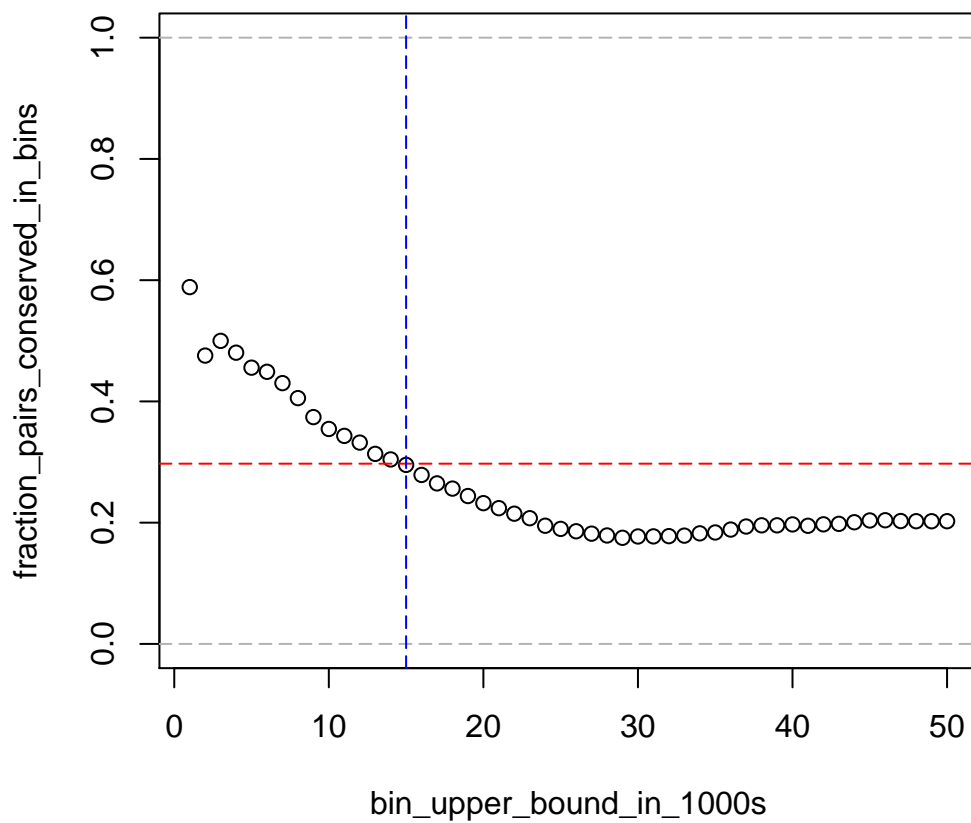

Supplement: s1 [file s1]

**Bin\_conservation\_minus\_bg\_AN69C\_vs\_TN603.4.2**  
**PD-0.667865**

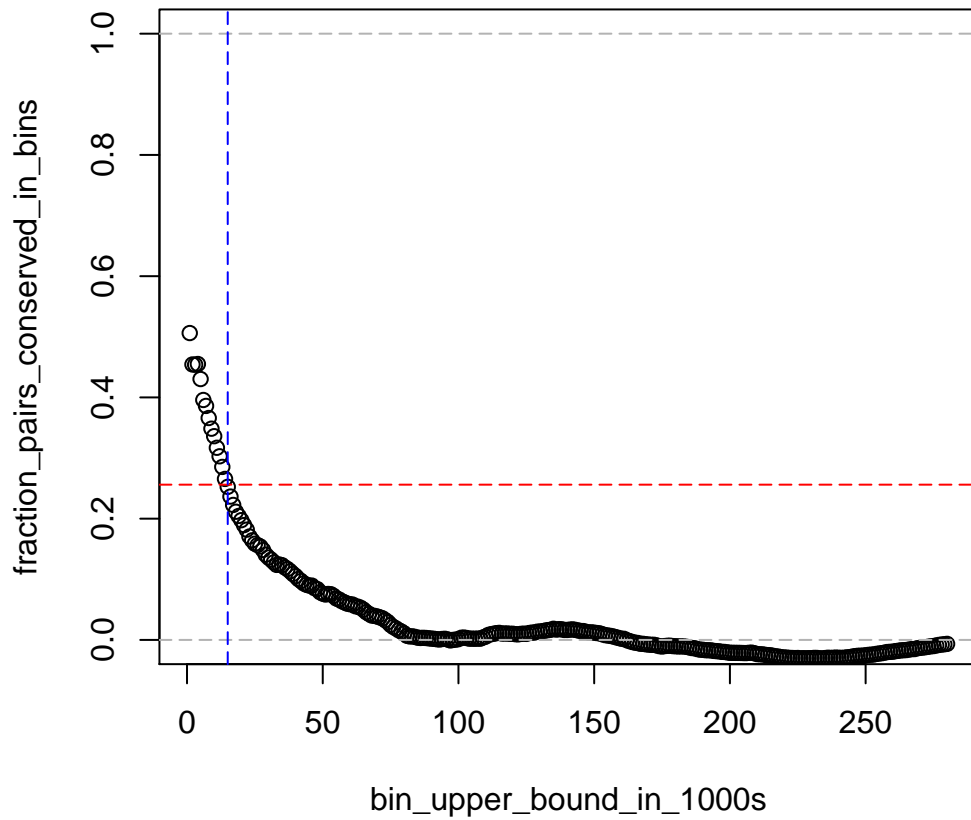

**Bin\_conservation\_minus\_bg\_AN69C\_vs\_TN603.4.2**  
**PD-0.667865**

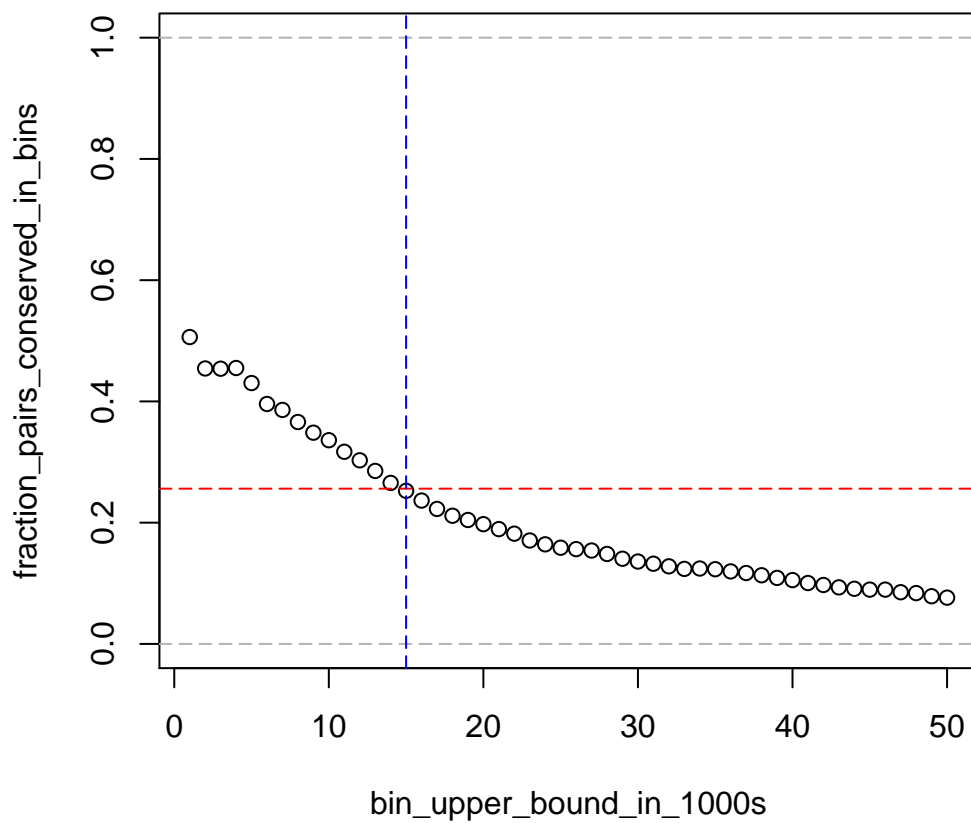

Supplement: s1 [file s1]

**Bin\_conservation\_minus\_bg\_ATCV1\_vs\_NY2A**  
**PD-0.709261**

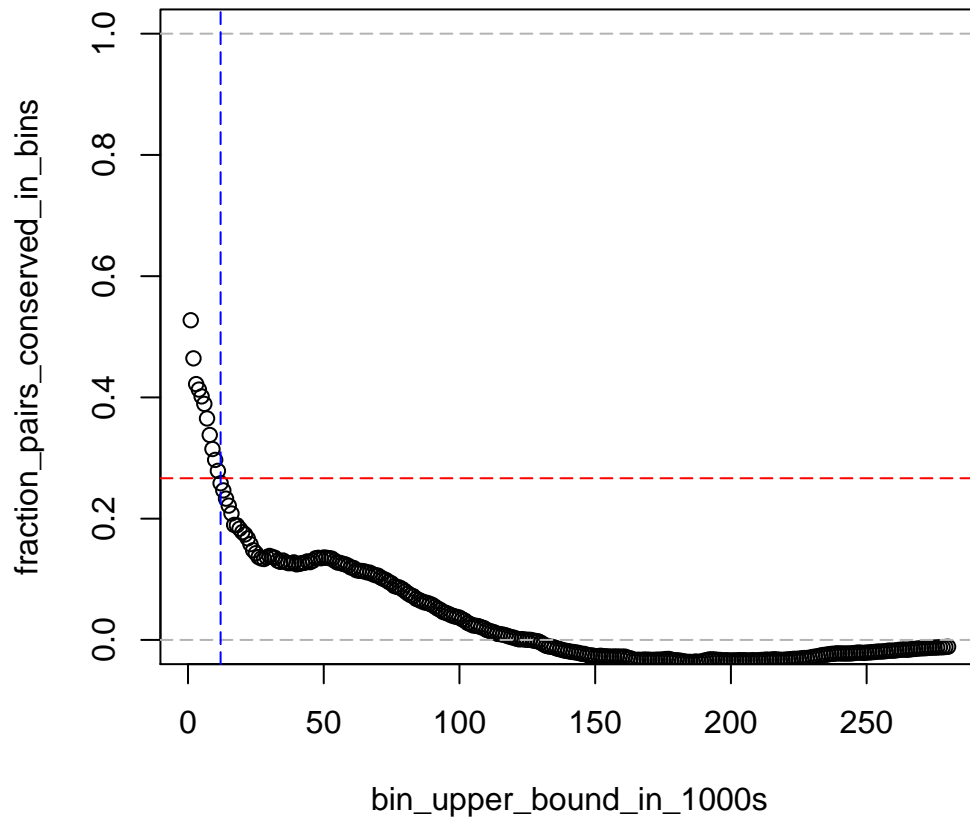

**Bin\_conservation\_minus\_bg\_ATCV1\_vs\_NY2A**  
**PD-0.709261**

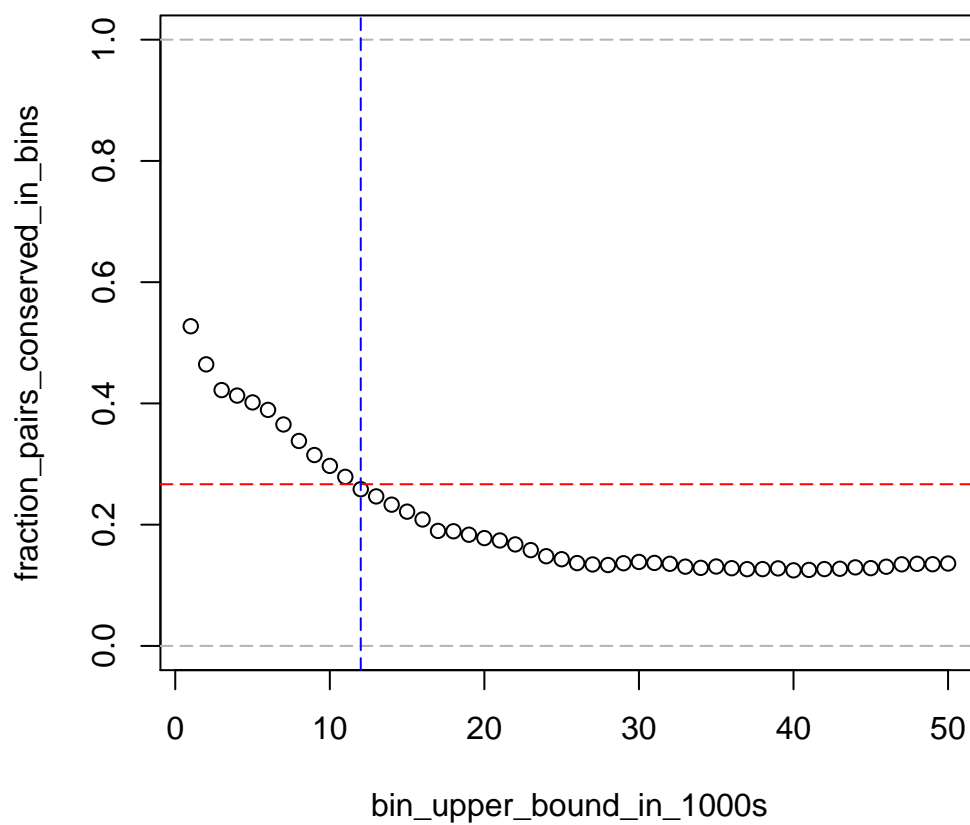

Supplement: s1 [file s1]

**Bin\_conservation\_minus\_bg\_Br0604L\_vs\_NE-JV-4**  
**PD-0.67093**

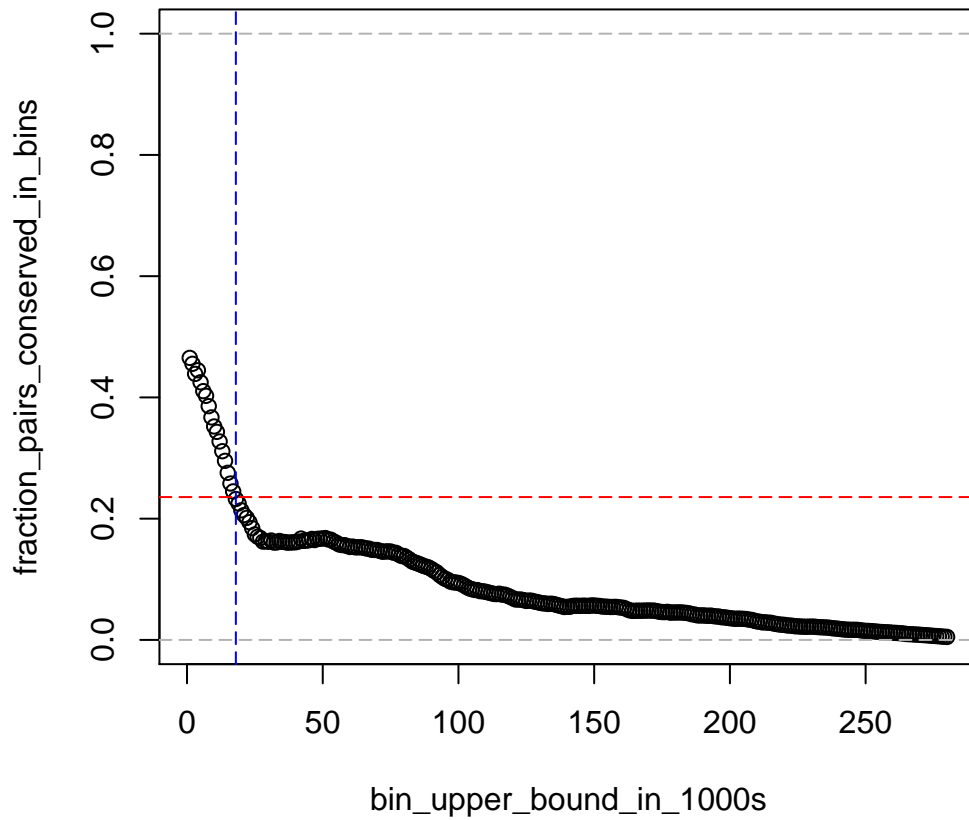

**Bin\_conservation\_minus\_bg\_Br0604L\_vs\_NE-JV-4**  
**PD-0.67093**

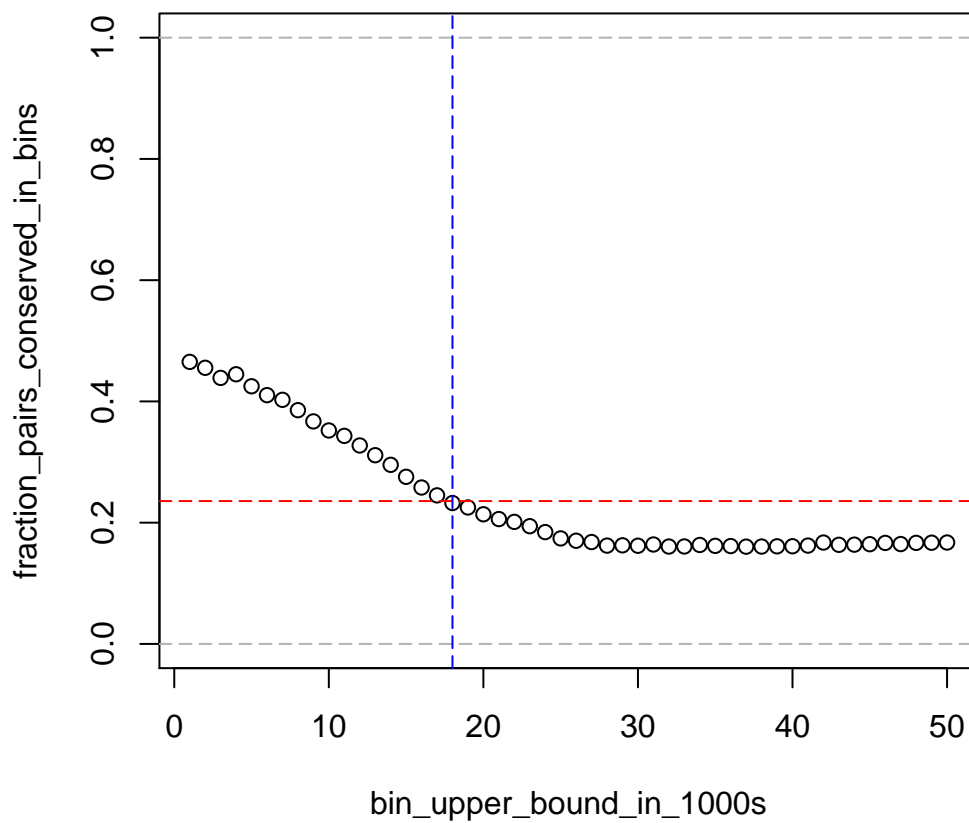

Supplement: s1 [file s1]

**Bin\_conservation\_minus\_bg\_ATCV1\_vs\_TN603.4.2**  
**PD-0.061116**

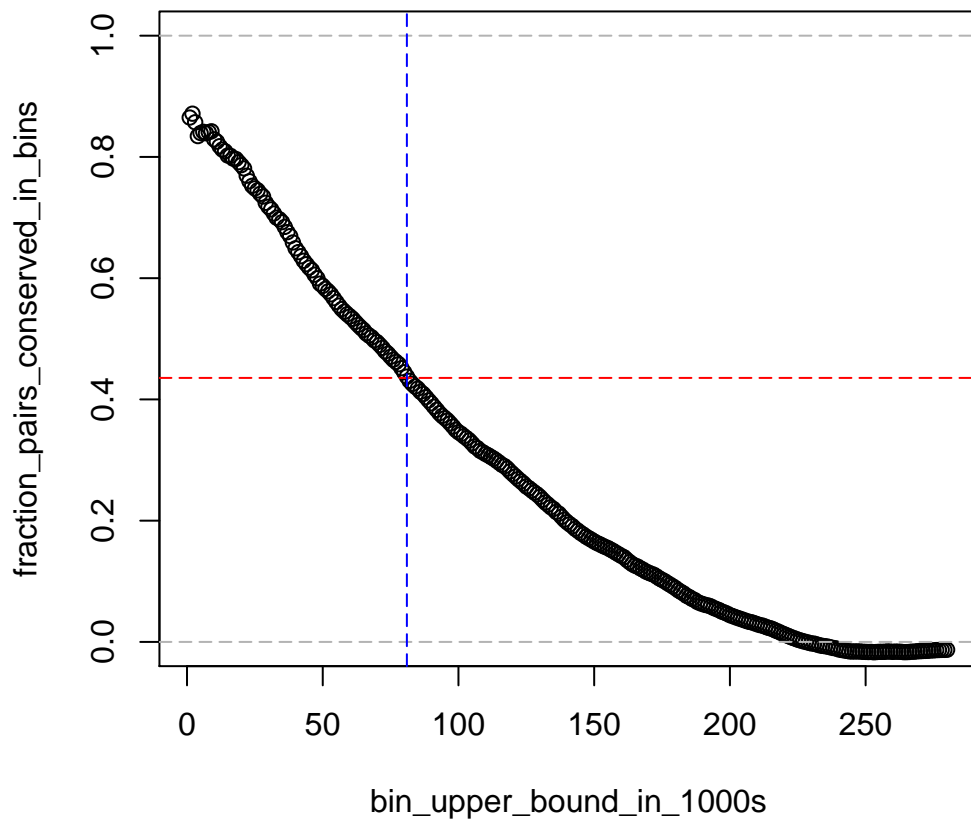

**Bin\_conservation\_minus\_bg\_ATCV1\_vs\_TN603.4.2**  
**PD-0.061116**

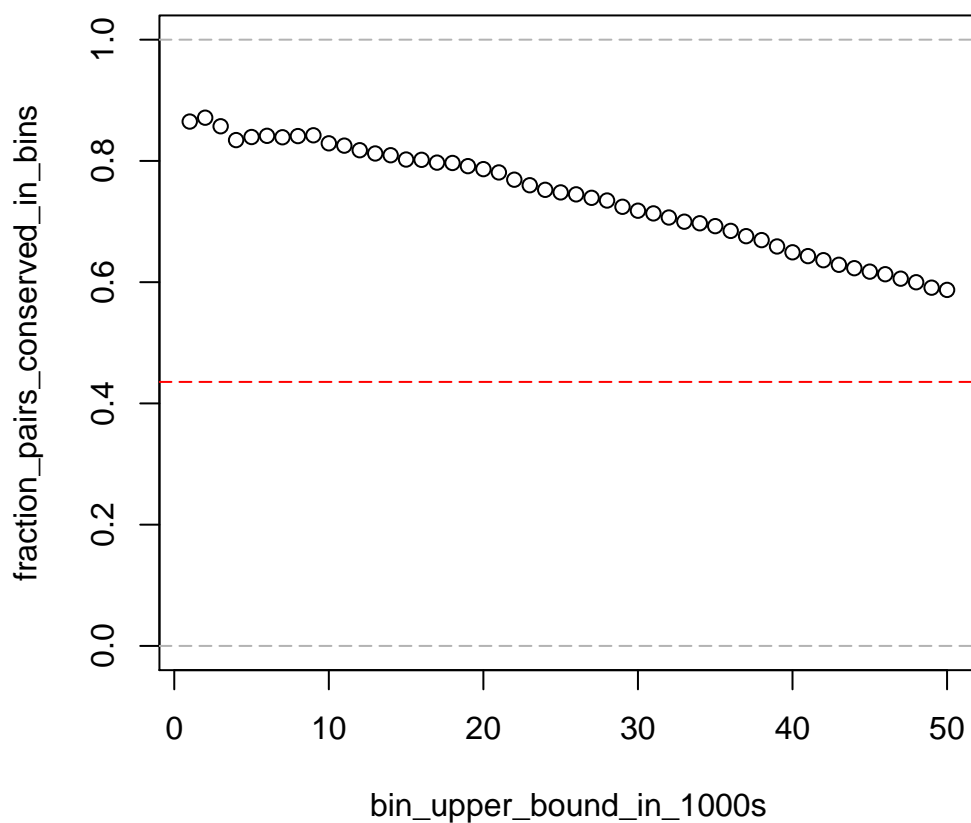

Supplement: s1 [file s1]

**Bin\_conservation\_minus\_bg\_CVB-1\_vs\_CviKI**  
**PD-0.66736**

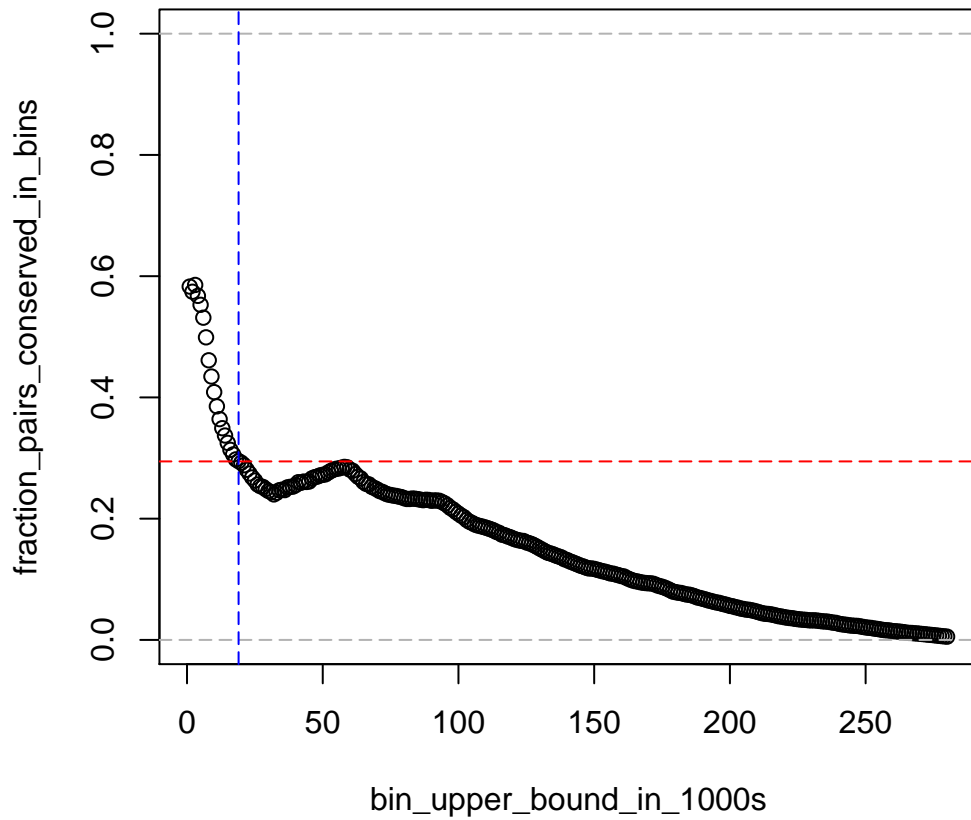

**Bin\_conservation\_minus\_bg\_CVB-1\_vs\_CviKI**  
**PD-0.66736**

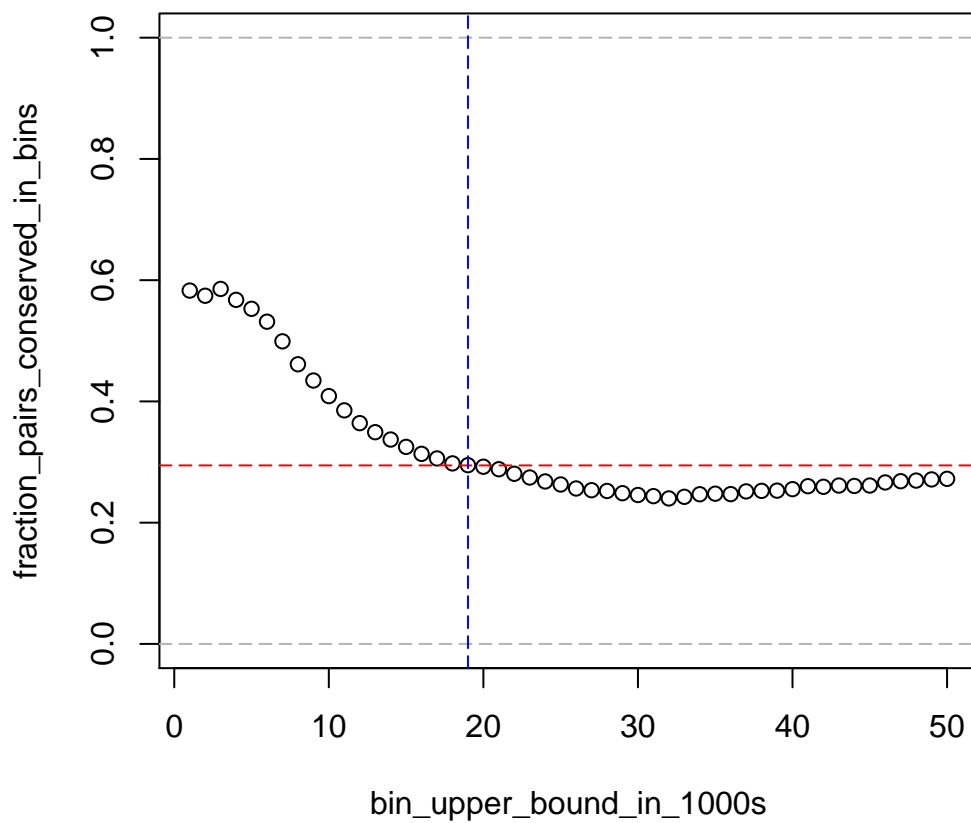

Supplement: s1 [file s1]

**Bin\_conservation\_minus\_bg\_AR158\_vs\_MA-1D**  
**PD-0.009716**

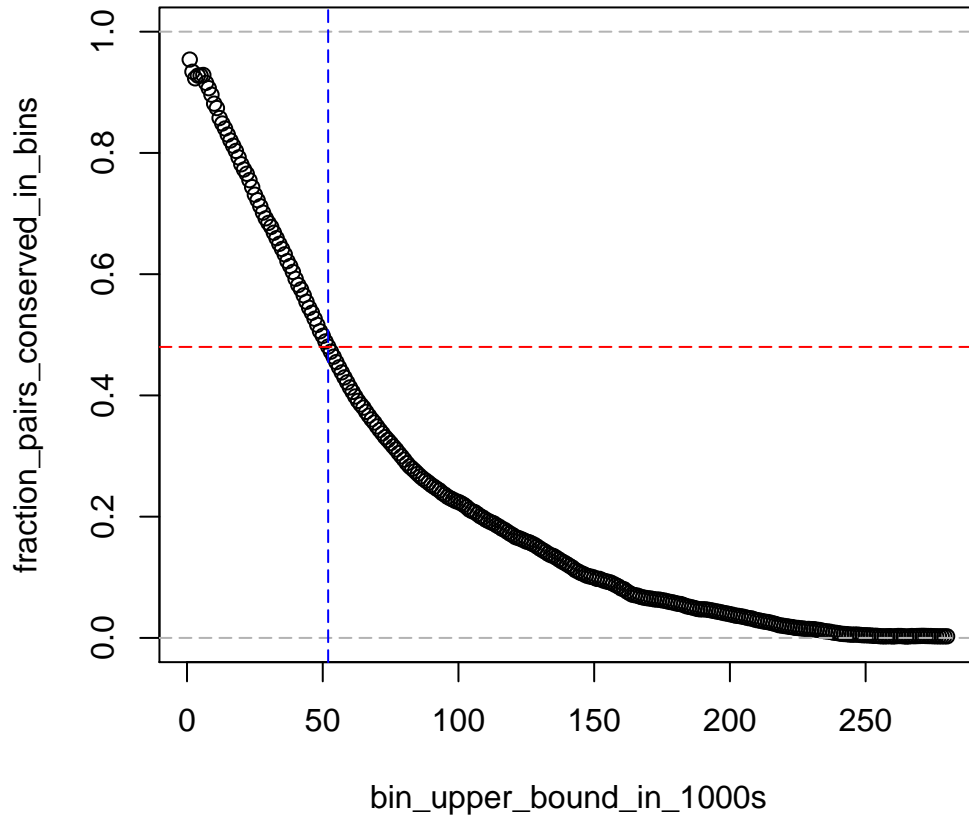

**Bin\_conservation\_minus\_bg\_AR158\_vs\_MA-1D**  
**PD-0.009716**

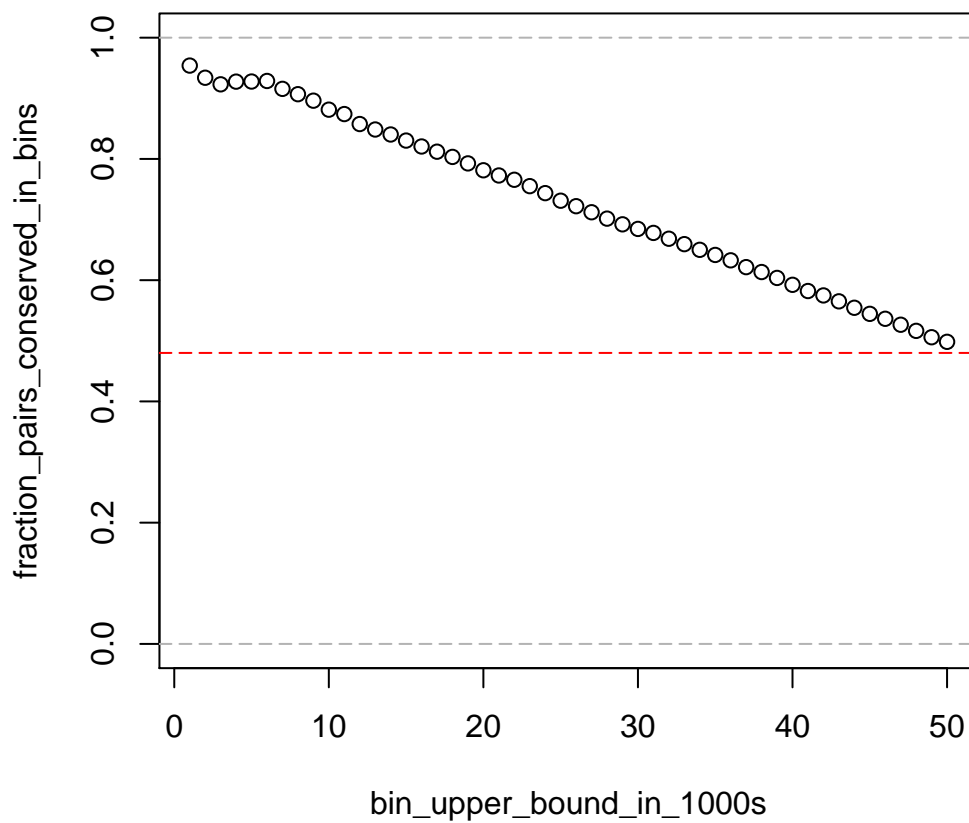

Supplement: s1 [file s1]

**Bin\_conservation\_minus\_bg\_Can0610SP\_vs\_CVG-1**  
**PD-0.462084**

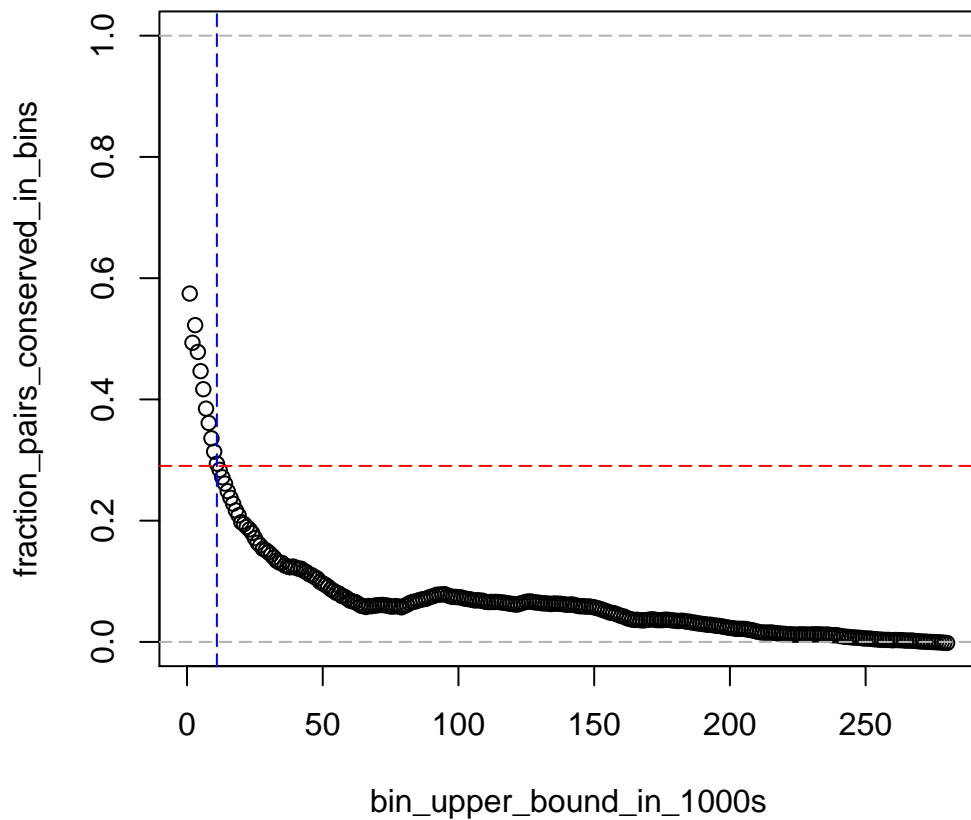

**Bin\_conservation\_minus\_bg\_Can0610SP\_vs\_CVG-1**  
**PD-0.462084**

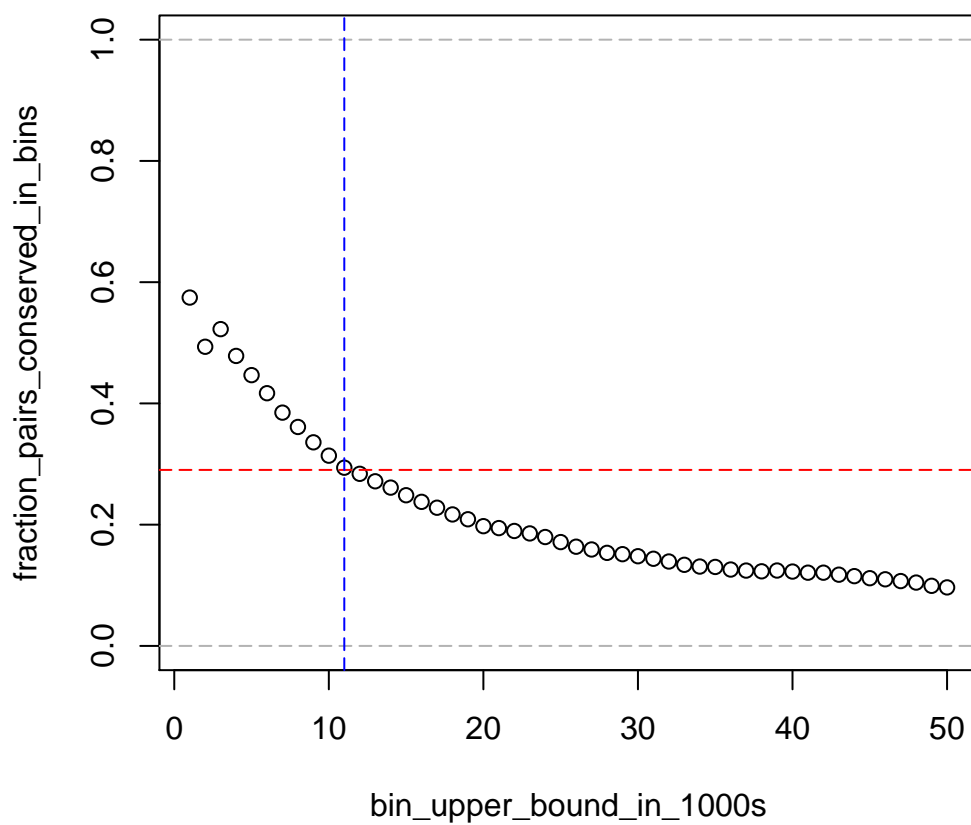

Supplement: s1 [file s1]

**Bin\_conservation\_minus\_bg\_CVB-1\_vs\_WI0606**  
**PD-0.479904**

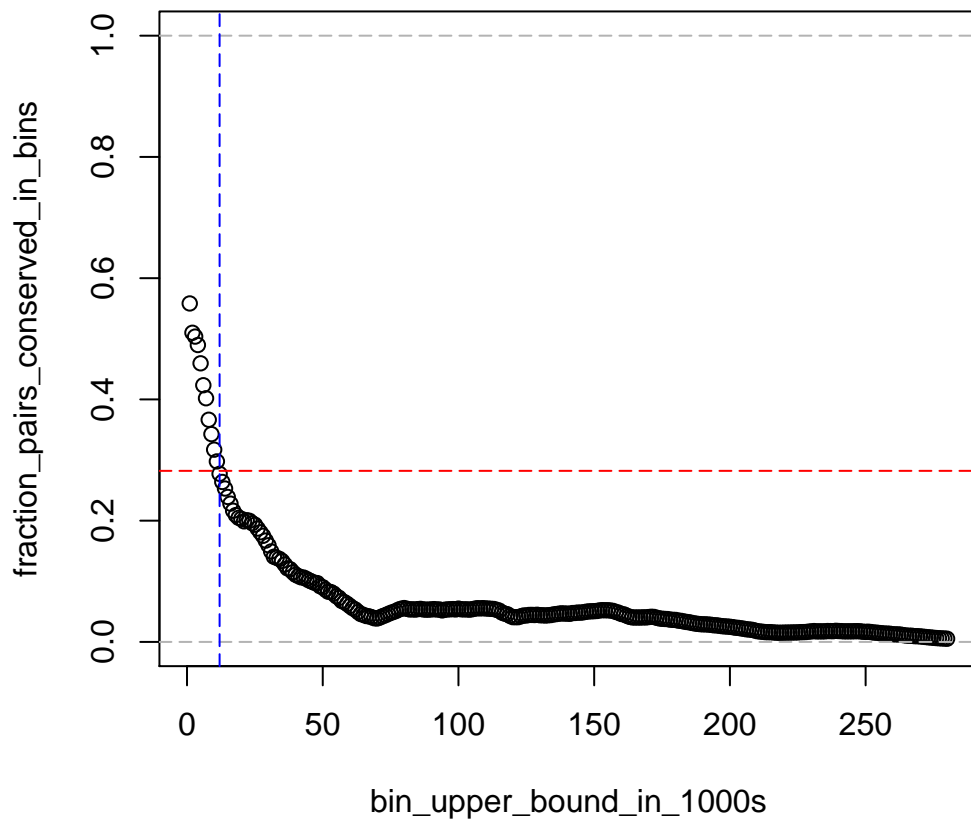

**Bin\_conservation\_minus\_bg\_CVB-1\_vs\_WI0606**  
**PD-0.479904**

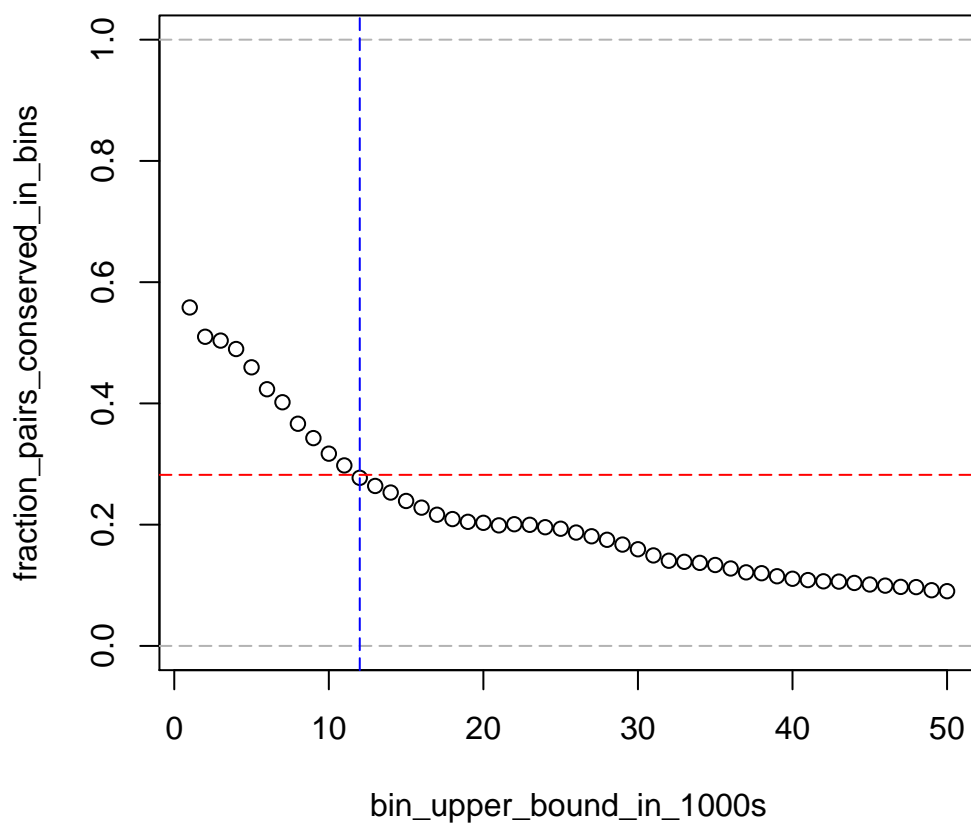

Supplement: s1 [file s1]

**Bin\_conservation\_minus\_bg\_Br0604L\_vs\_CVA-1**  
**PD-0.446879**

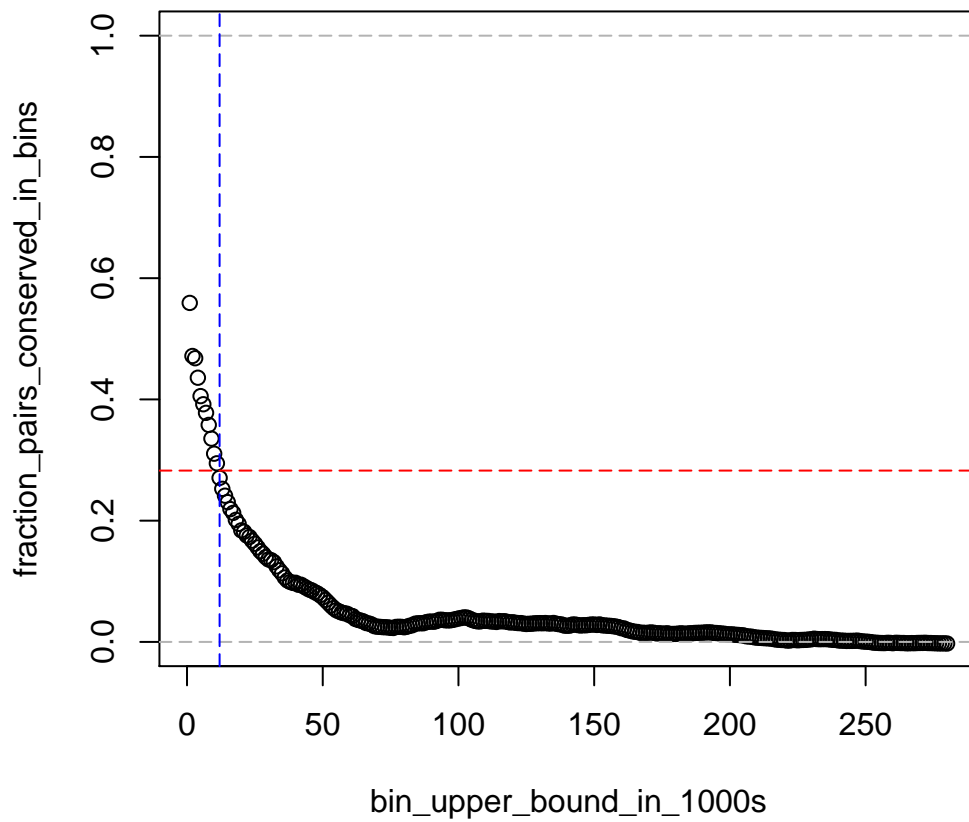

**Bin\_conservation\_minus\_bg\_Br0604L\_vs\_CVA-1**  
**PD-0.446879**

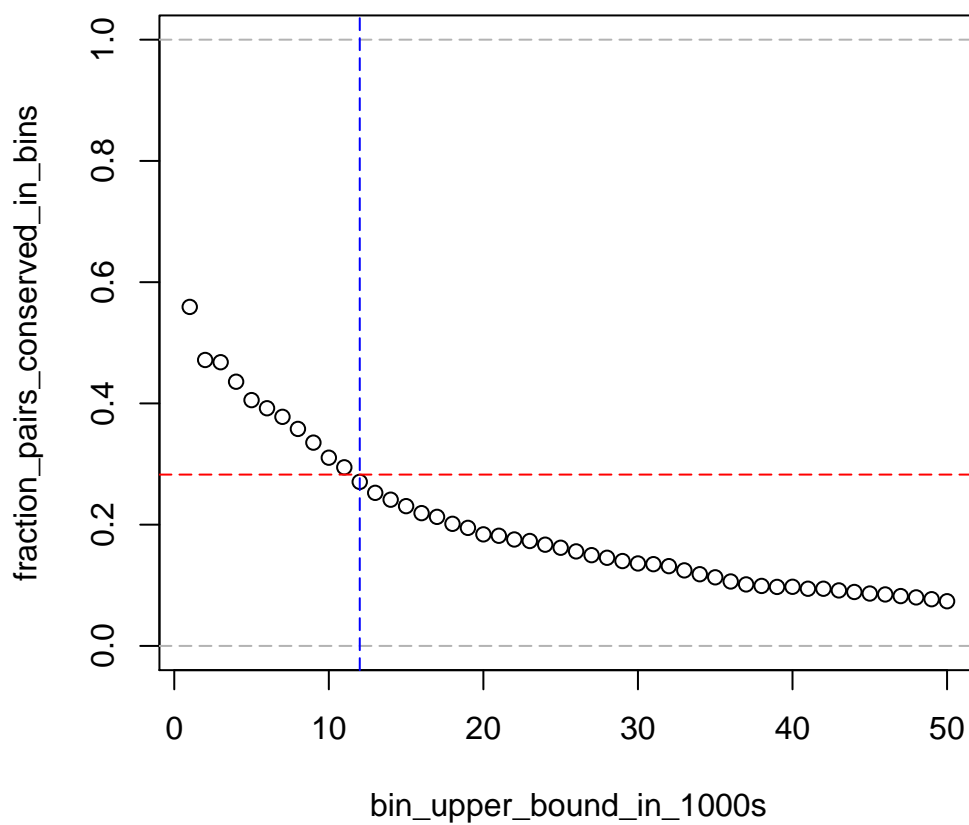

Supplement: s1 [file s1]

**Bin\_conservation\_minus\_bg\_TN603.4.2\_vs\_WI0606**  
**PD-0.065785**

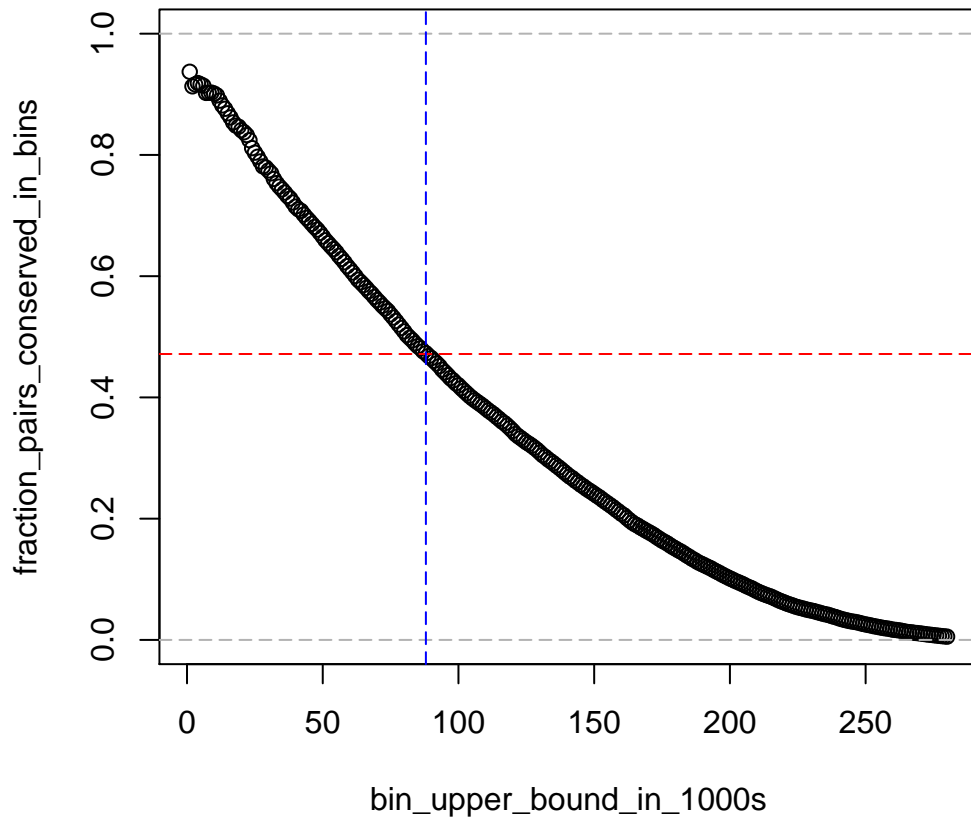

**Bin\_conservation\_minus\_bg\_TN603.4.2\_vs\_WI0606**  
**PD-0.065785**

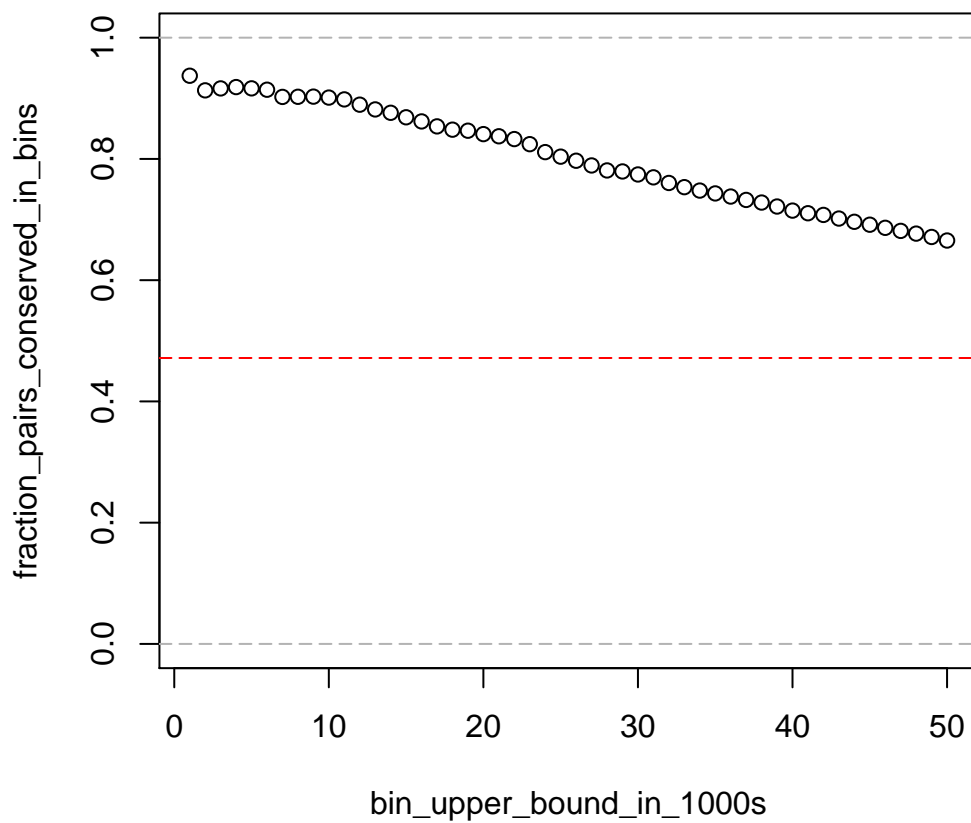

Supplement: s1 [file s1]

**Bin\_conservation\_minus\_bg\_NY2A\_vs\_OR0704.3**  
**PD-0.710163**

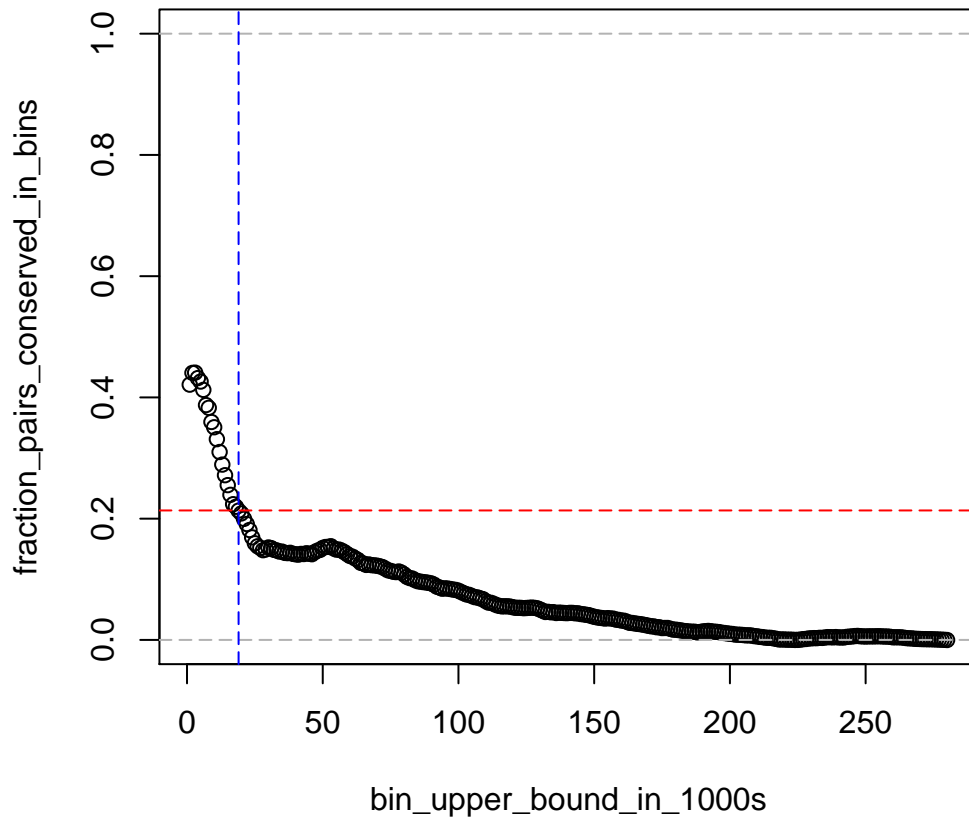

**Bin\_conservation\_minus\_bg\_NY2A\_vs\_OR0704.3**  
**PD-0.710163**

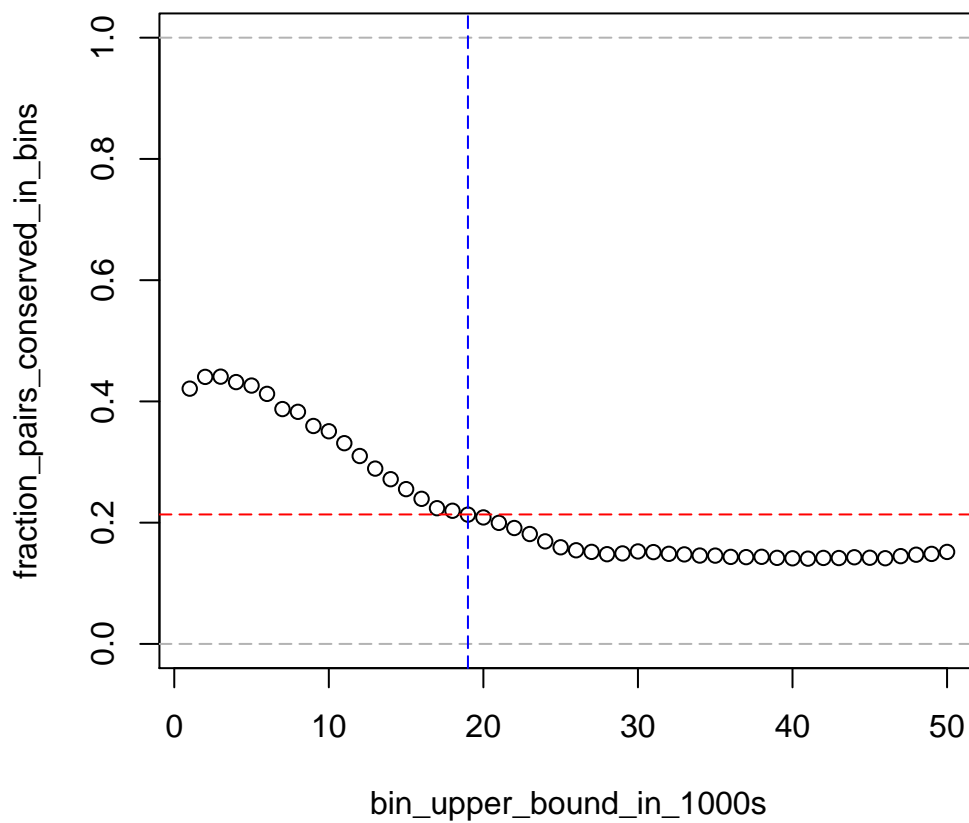

Supplement: s1 [file s1]

**Bin\_conservation\_minus\_bg\_AN69C\_vs\_ATCV1**  
**PD-0.677561**

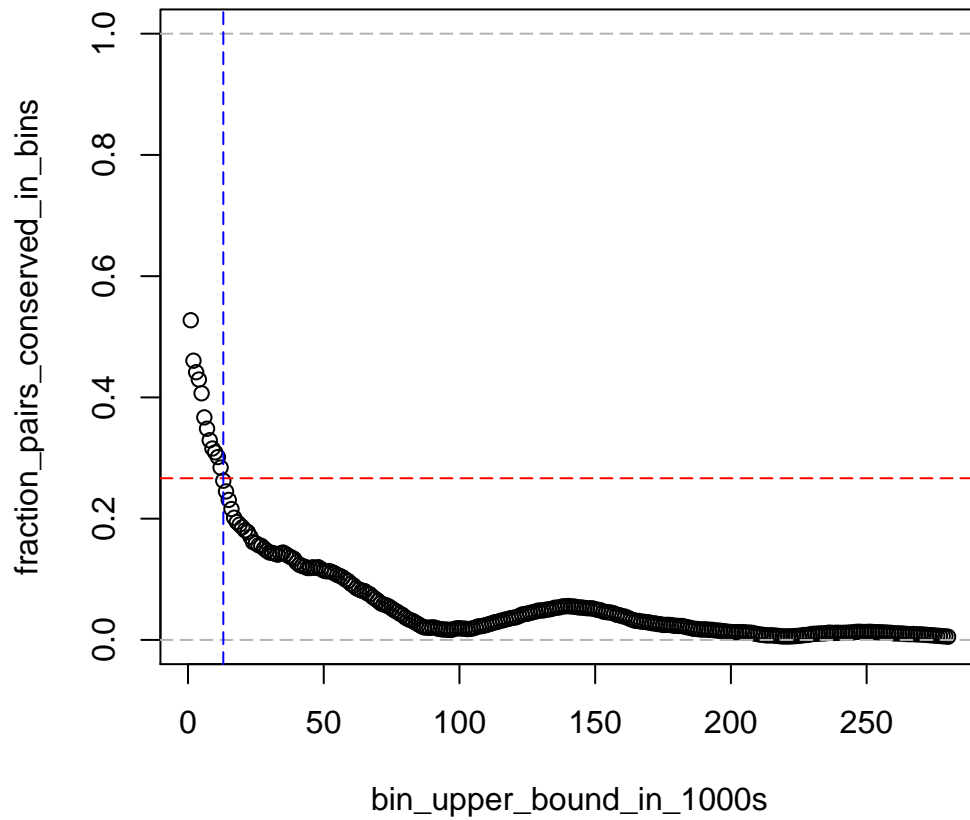

**Bin\_conservation\_minus\_bg\_AN69C\_vs\_ATCV1**  
**PD-0.677561**

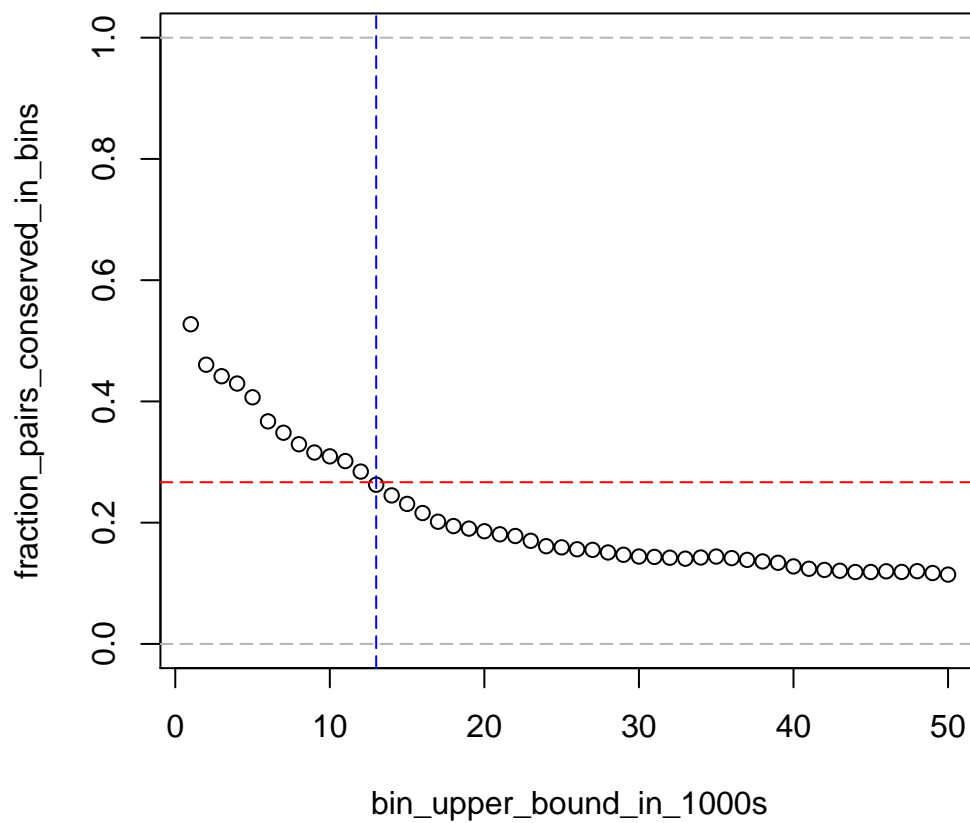

Supplement: s1 [file s1]

**Bin\_conservation\_minus\_bg\_CVA-1\_vs\_OR0704.3**  
**PD-0.457863**

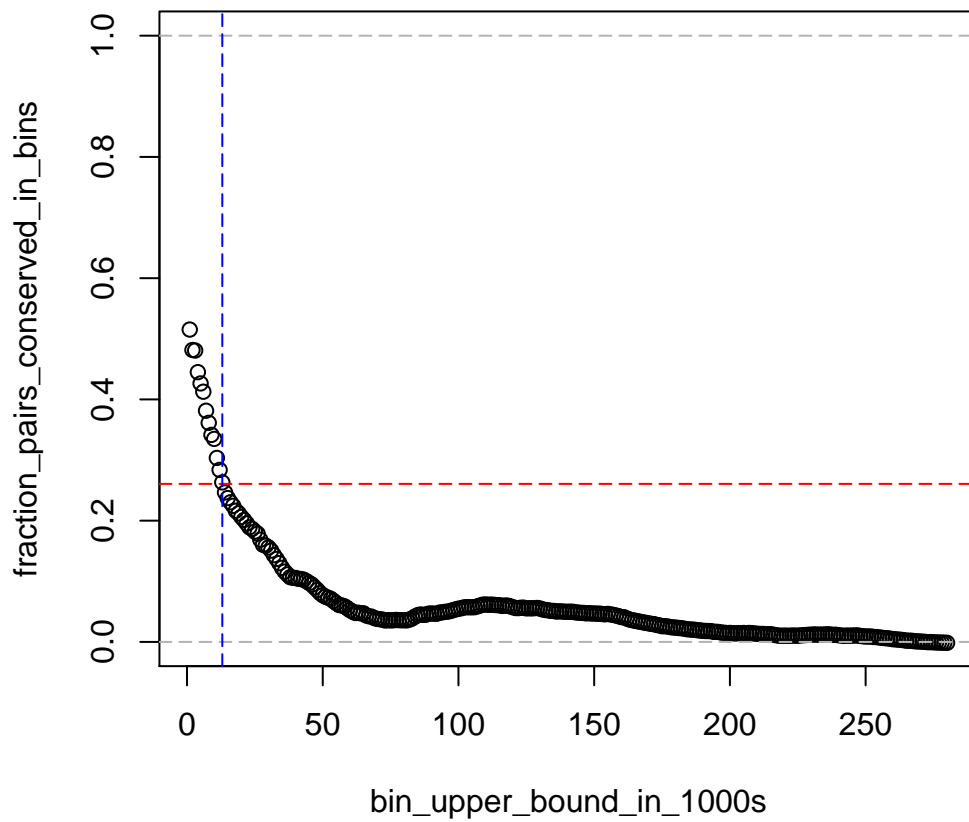

**Bin\_conservation\_minus\_bg\_CVA-1\_vs\_OR0704.3**  
**PD-0.457863**

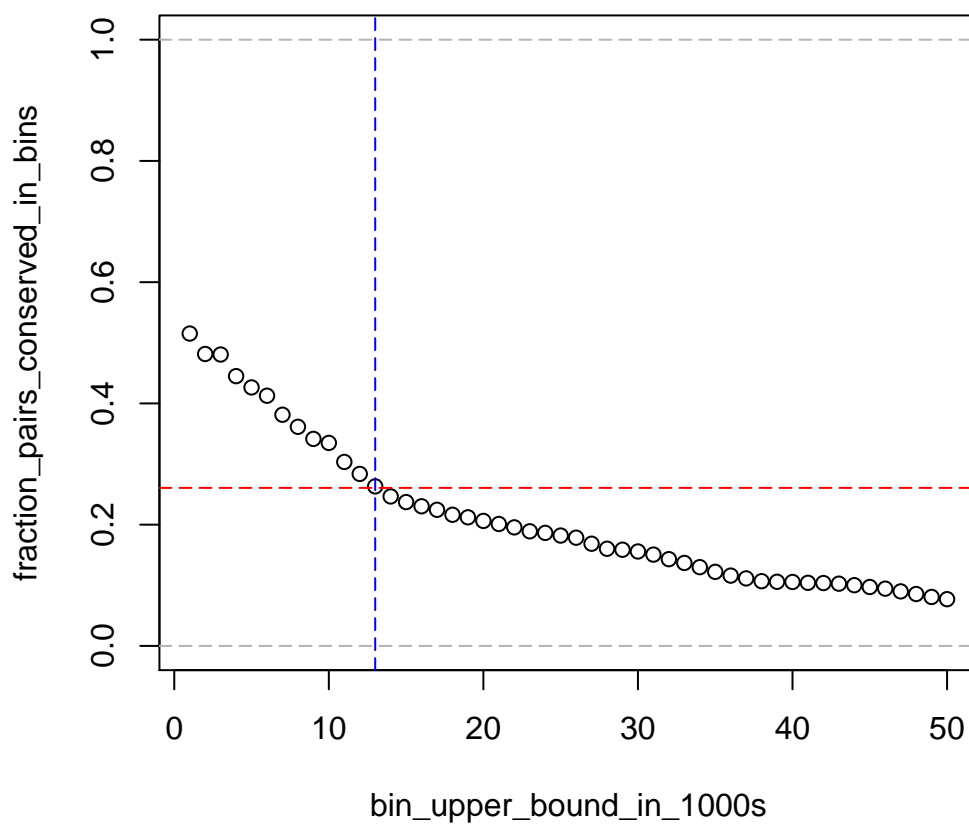

Supplement: s1 [file s1]

**Bin\_conservation\_minus\_bg\_ATCV1\_vs\_MA-1D**  
**PD-0.700193**

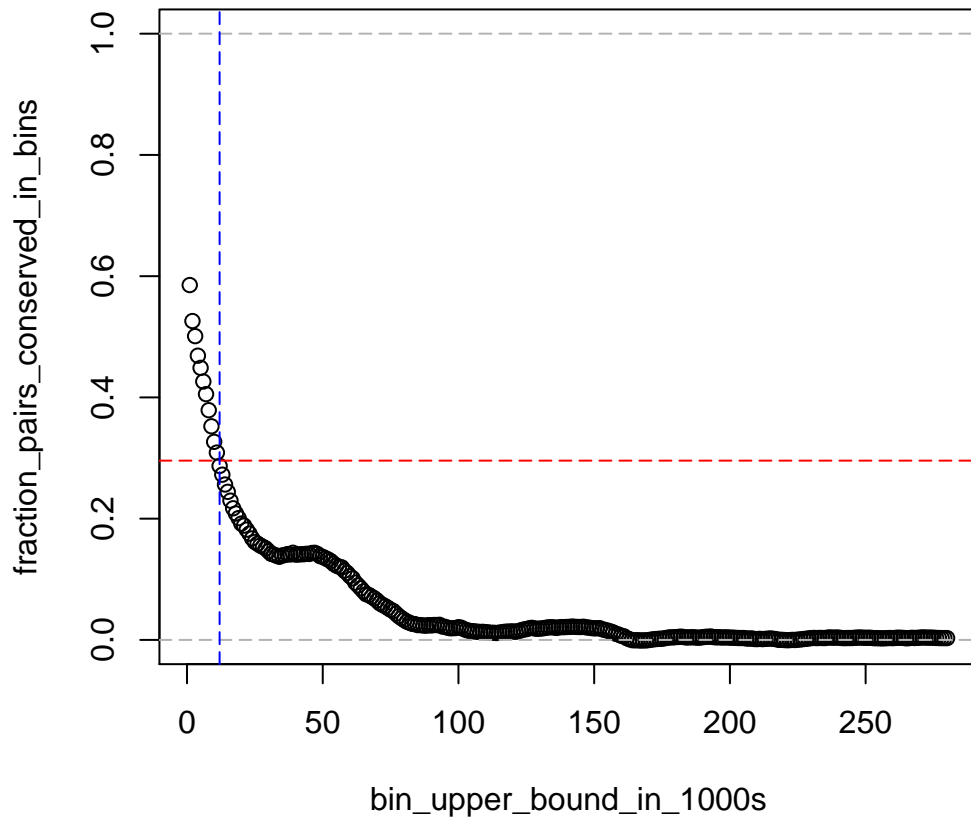

**Bin\_conservation\_minus\_bg\_ATCV1\_vs\_MA-1D**  
**PD-0.700193**

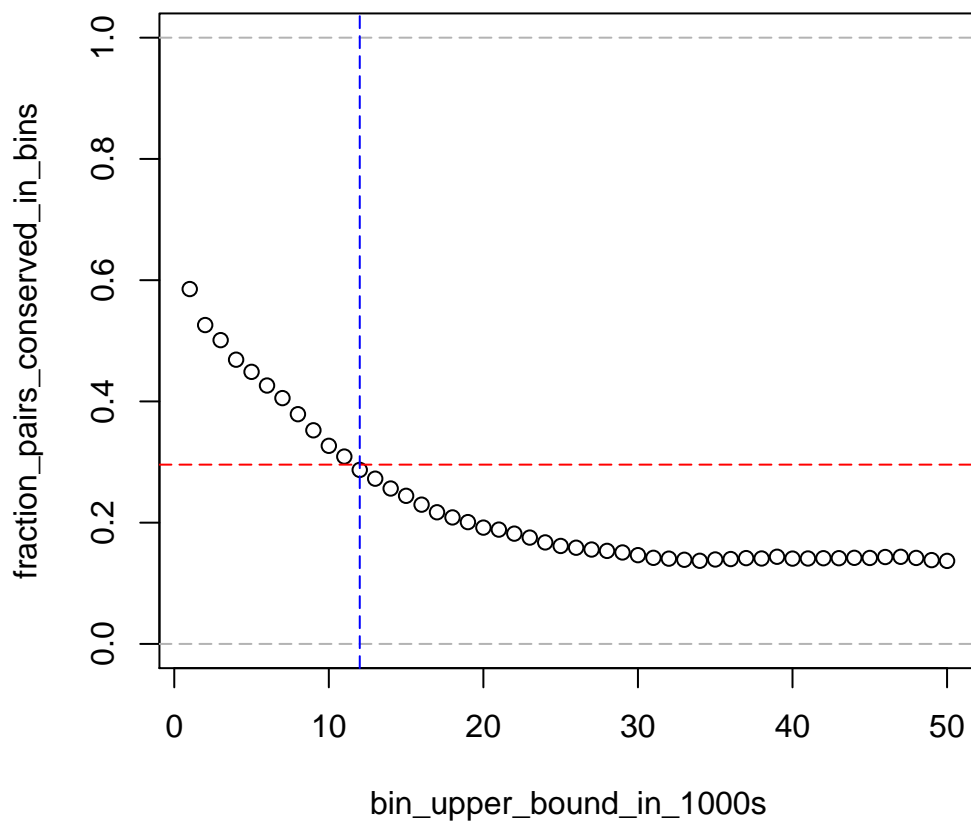

Supplement: s1 [file s1]

**Bin\_conservation\_minus\_bg\_CVG-1\_vs\_OR0704.3**  
**PD-0.462094**

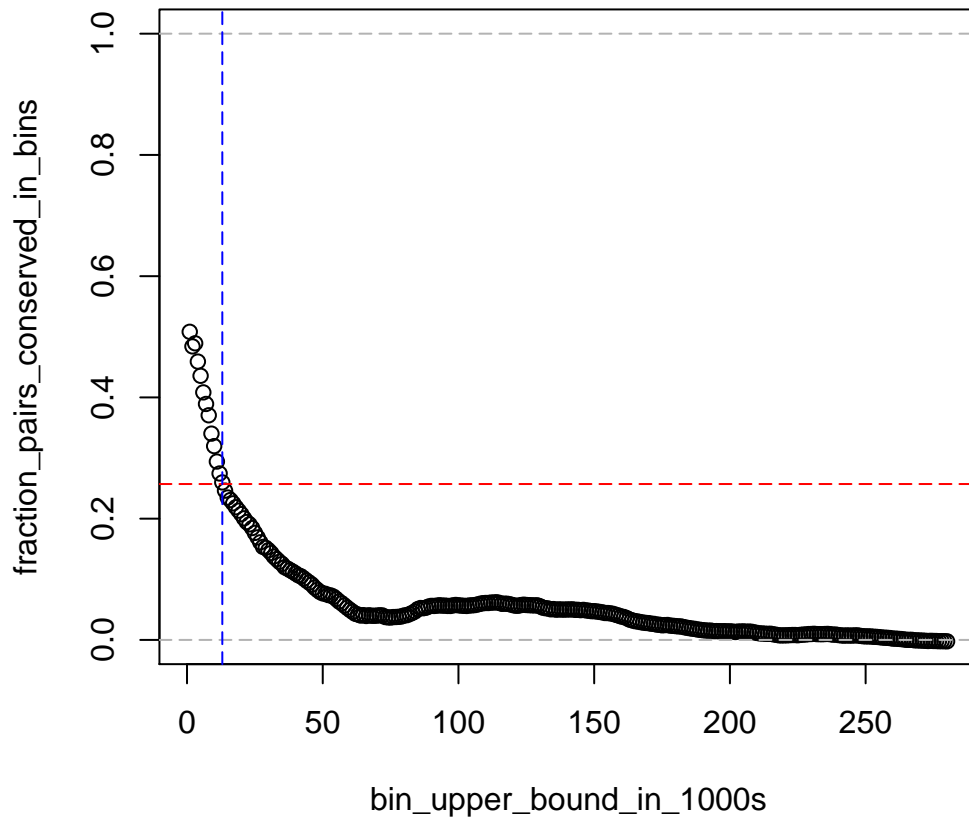

**Bin\_conservation\_minus\_bg\_CVG-1\_vs\_OR0704.3**  
**PD-0.462094**

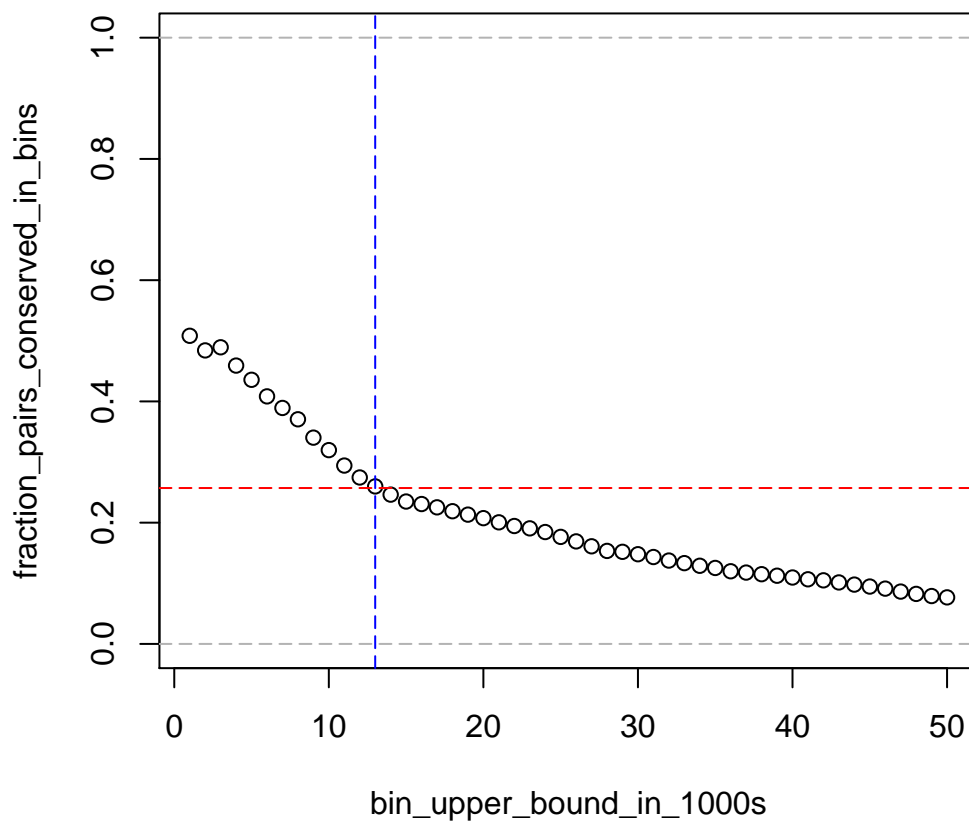

Supplement: s1 [file s1]

**Bin\_conservation\_minus\_bg\_NTS-1\_vs\_NYs-1**  
**PD-0.697618**

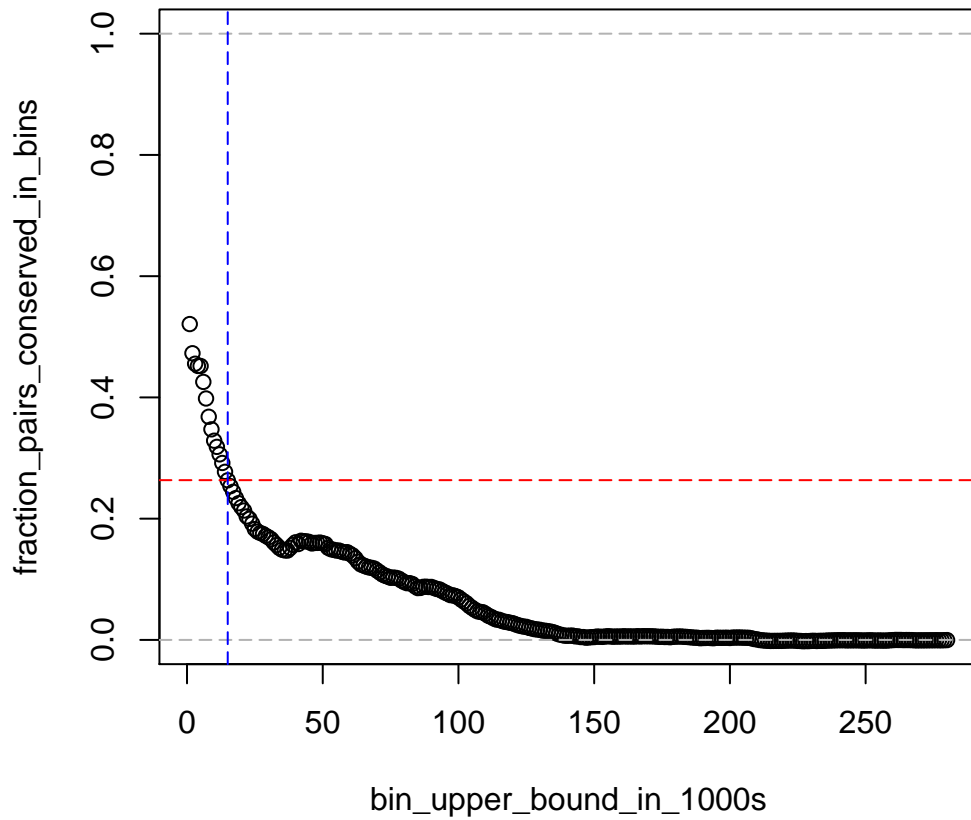

**Bin\_conservation\_minus\_bg\_NTS-1\_vs\_NYs-1**  
**PD-0.697618**

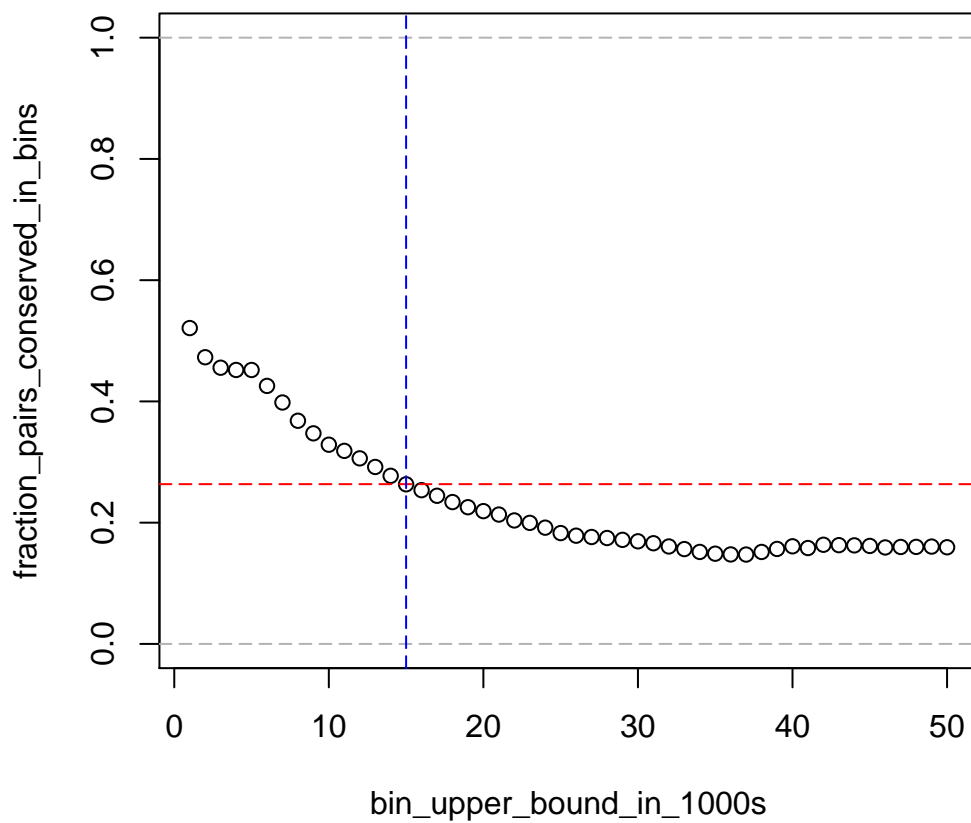

Supplement: s1 [file s1]

**Bin\_conservation\_minus\_bg\_AP110A\_vs\_NTS-1**  
**PD-0.457523**

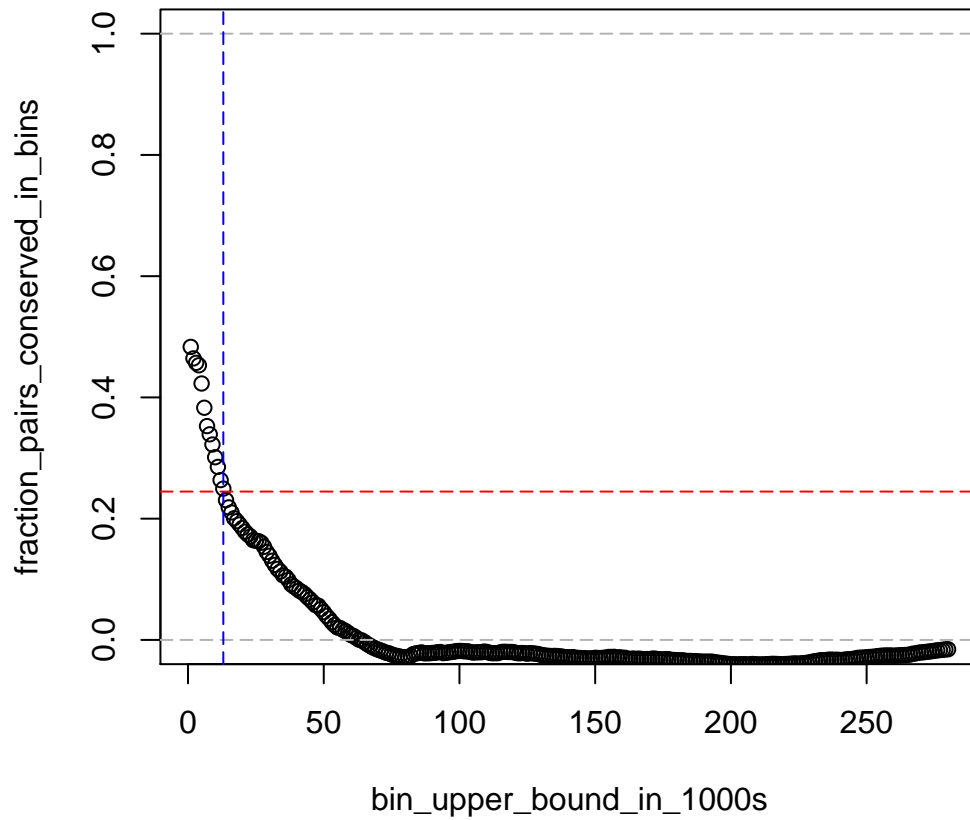

**Bin\_conservation\_minus\_bg\_AP110A\_vs\_NTS-1**  
**PD-0.457523**

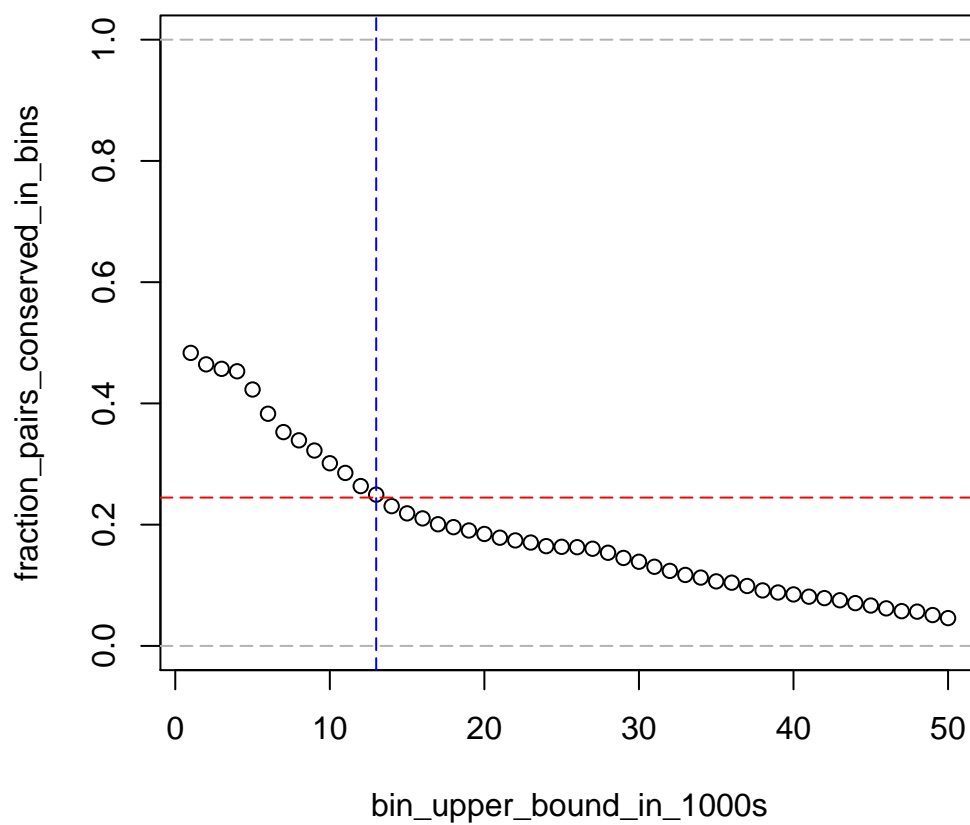

Supplement: s1 [file s1]

**Bin\_conservation\_minus\_bg\_IL-3A\_vs\_MN0810.1**  
**PD-0.678924**

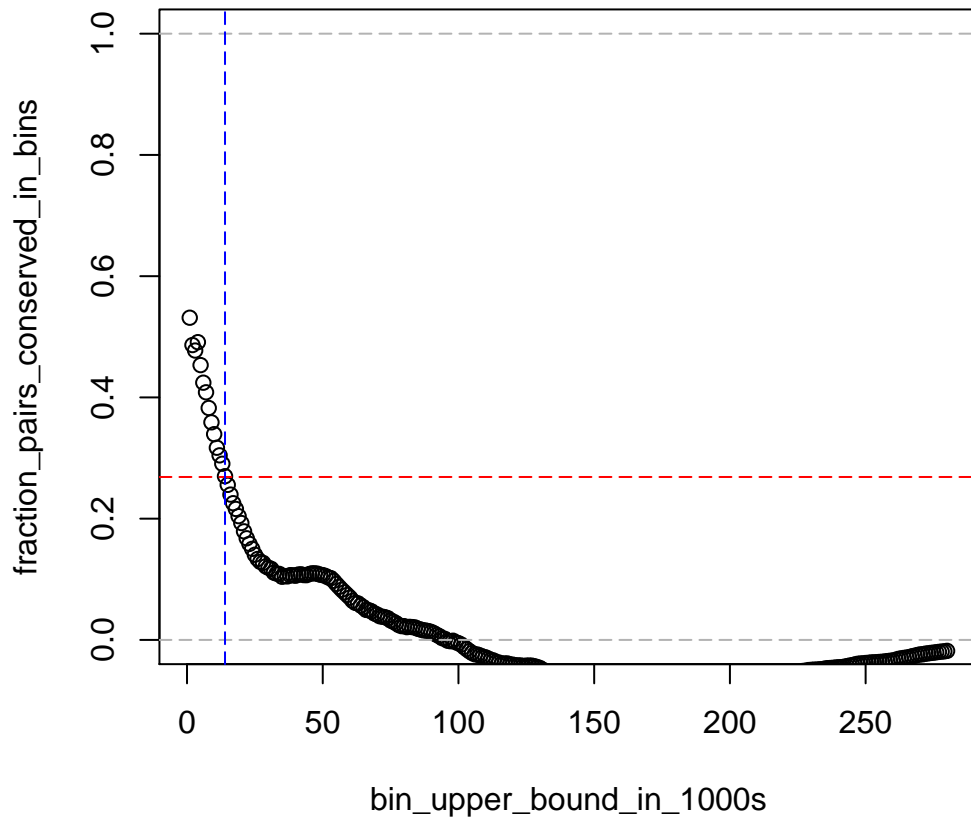

**Bin\_conservation\_minus\_bg\_IL-3A\_vs\_MN0810.1**  
**PD-0.678924**

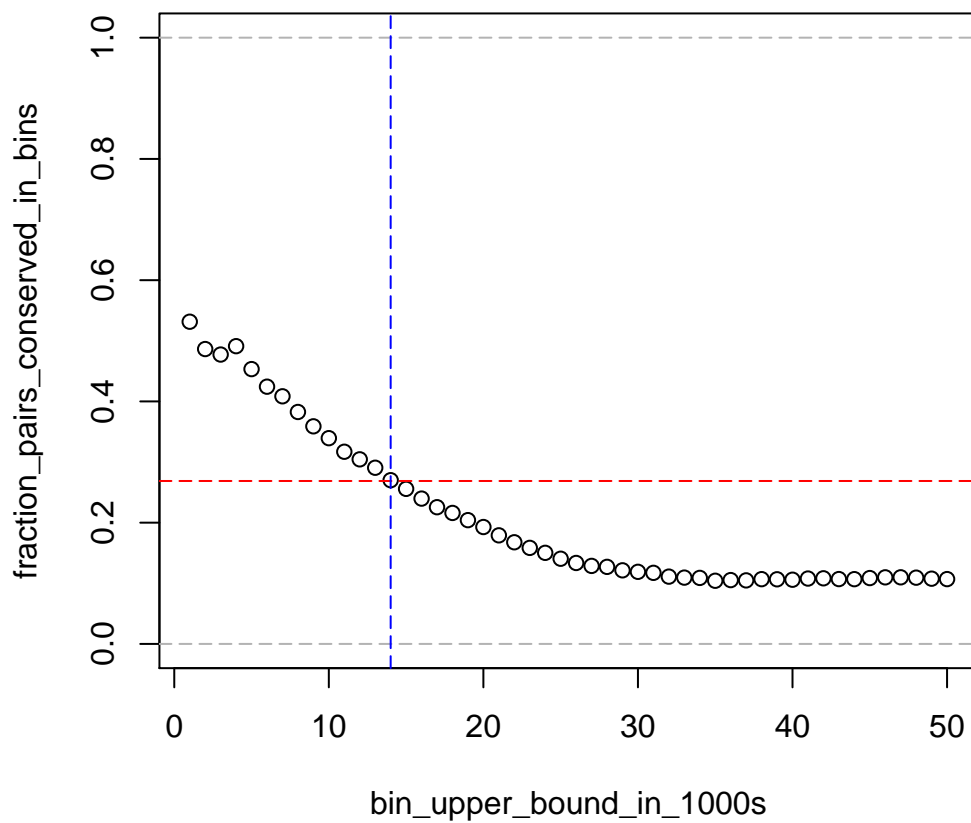

Supplement: s1 [file s1]

**Bin\_conservation\_minus\_bg\_CZ-2\_vs\_IL-3A**  
**PD-0.644117**

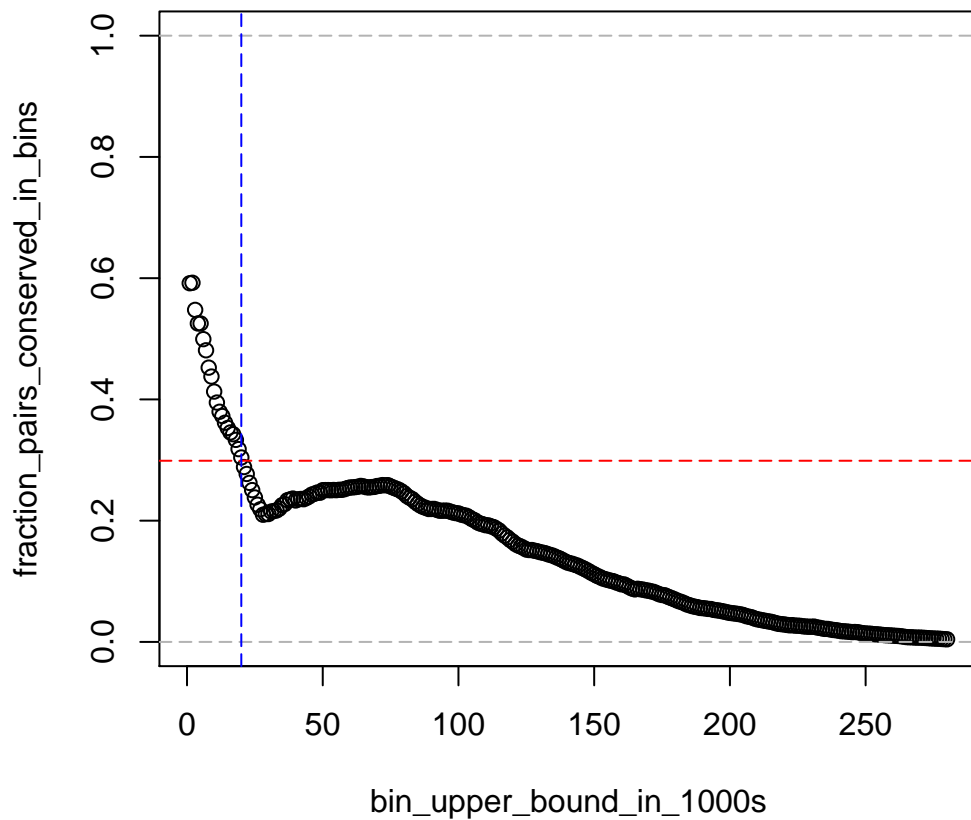

**Bin\_conservation\_minus\_bg\_CZ-2\_vs\_IL-3A**  
**PD-0.644117**

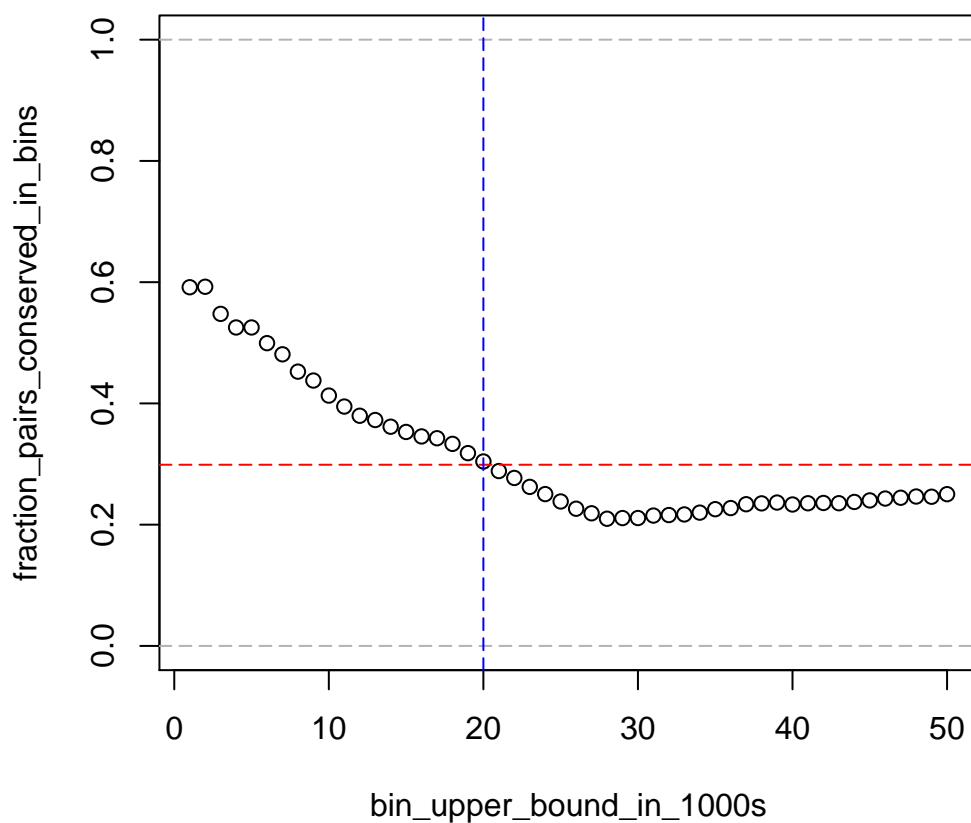

Supplement: s1 [file s1]

**Bin\_conservation\_minus\_bg\_CVM-1\_vs\_OR0704.3**  
**PD-0.459636**

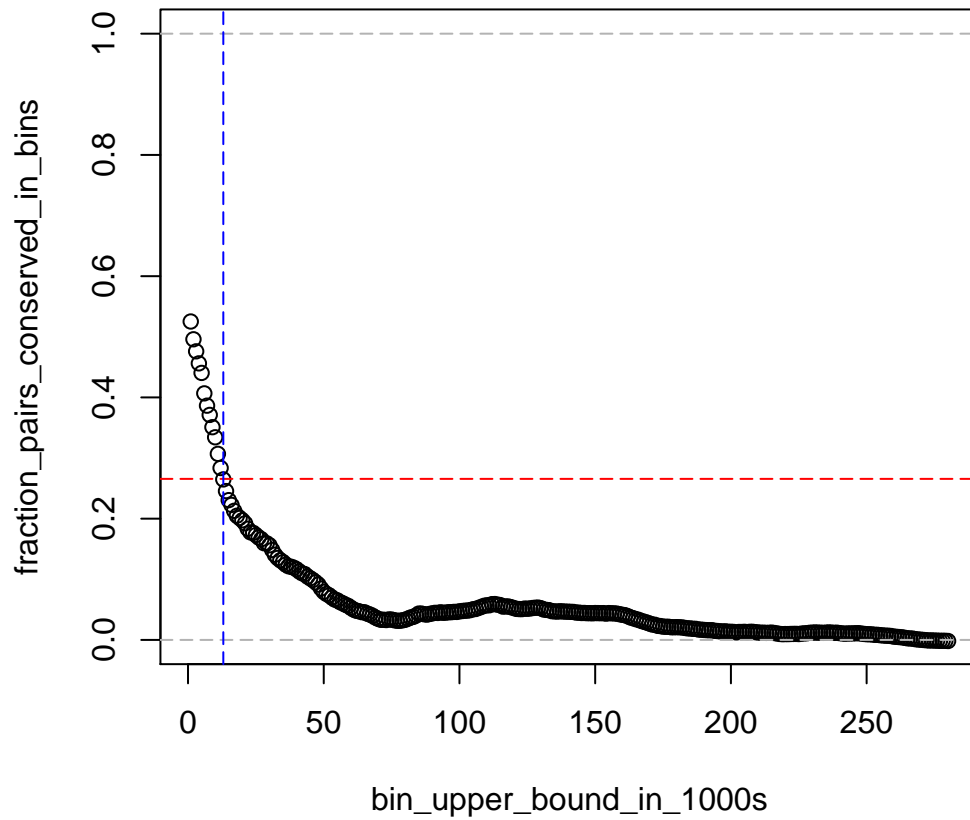

**Bin\_conservation\_minus\_bg\_CVM-1\_vs\_OR0704.3**  
**PD-0.459636**

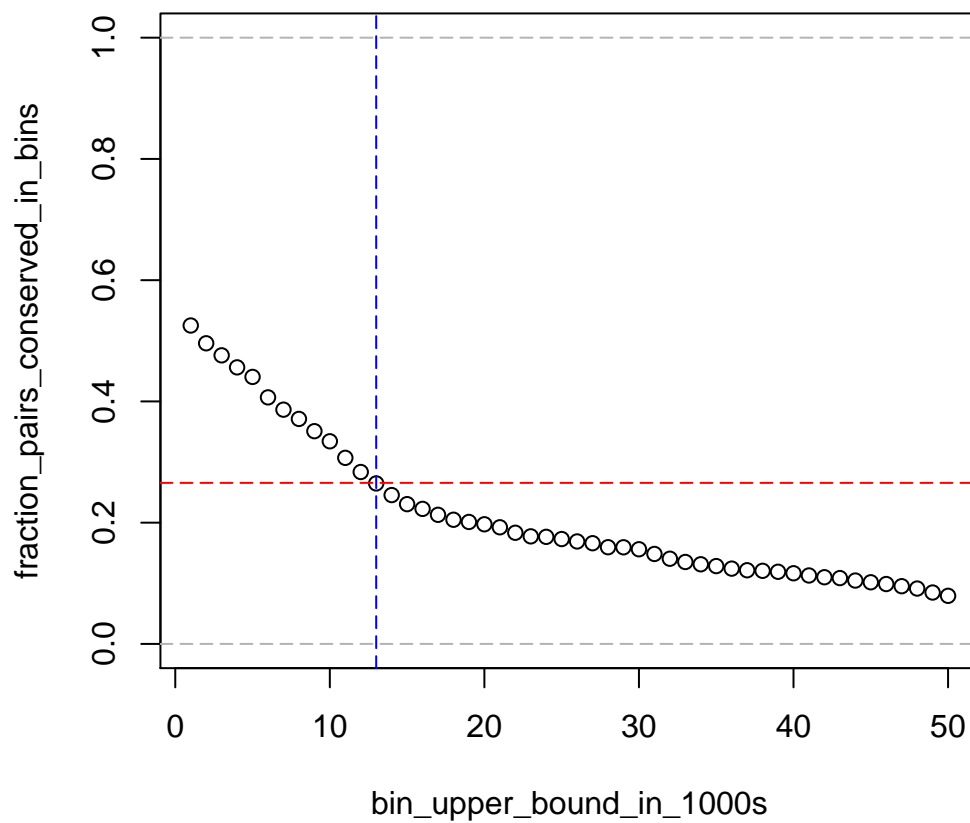

Supplement: s1 [file s1]

**Bin\_conservation\_minus\_bg\_MO0605SPH\_vs\_NY2A**  
**PD-0.713422**

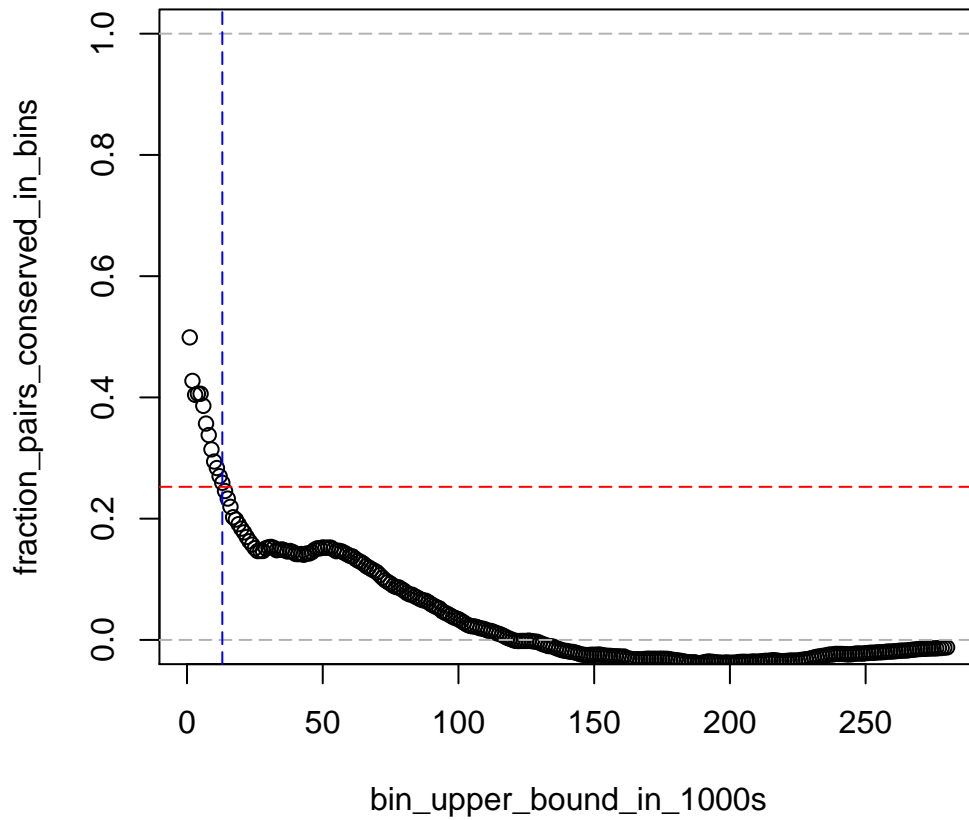

**Bin\_conservation\_minus\_bg\_MO0605SPH\_vs\_NY2A**  
**PD-0.713422**

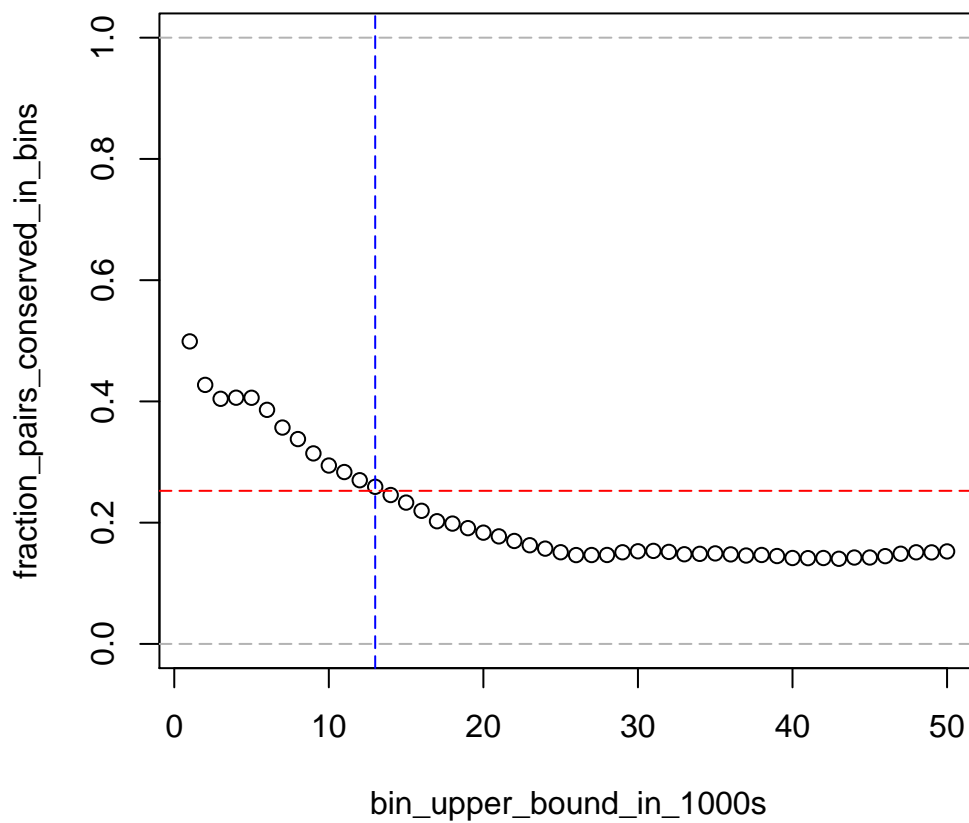

Supplement: s1 [file s1]

**Bin\_conservation\_minus\_bg\_Canal-1\_vs\_CZ-2**  
**PD-0.465631**

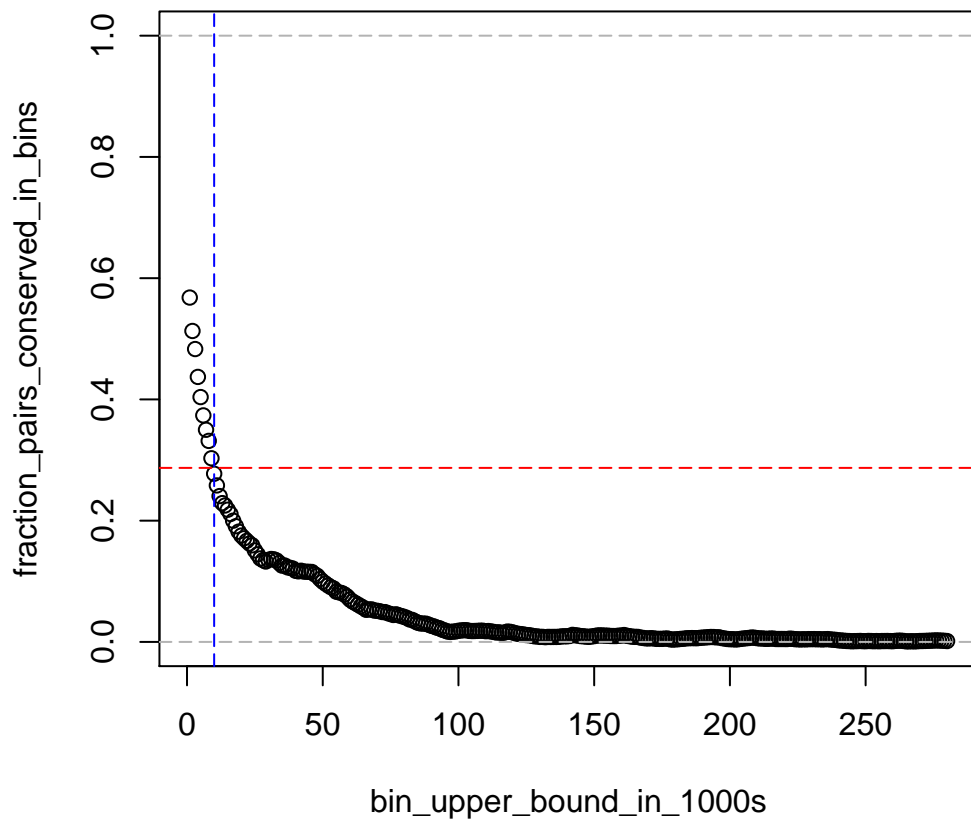

**Bin\_conservation\_minus\_bg\_Canal-1\_vs\_CZ-2**  
**PD-0.465631**

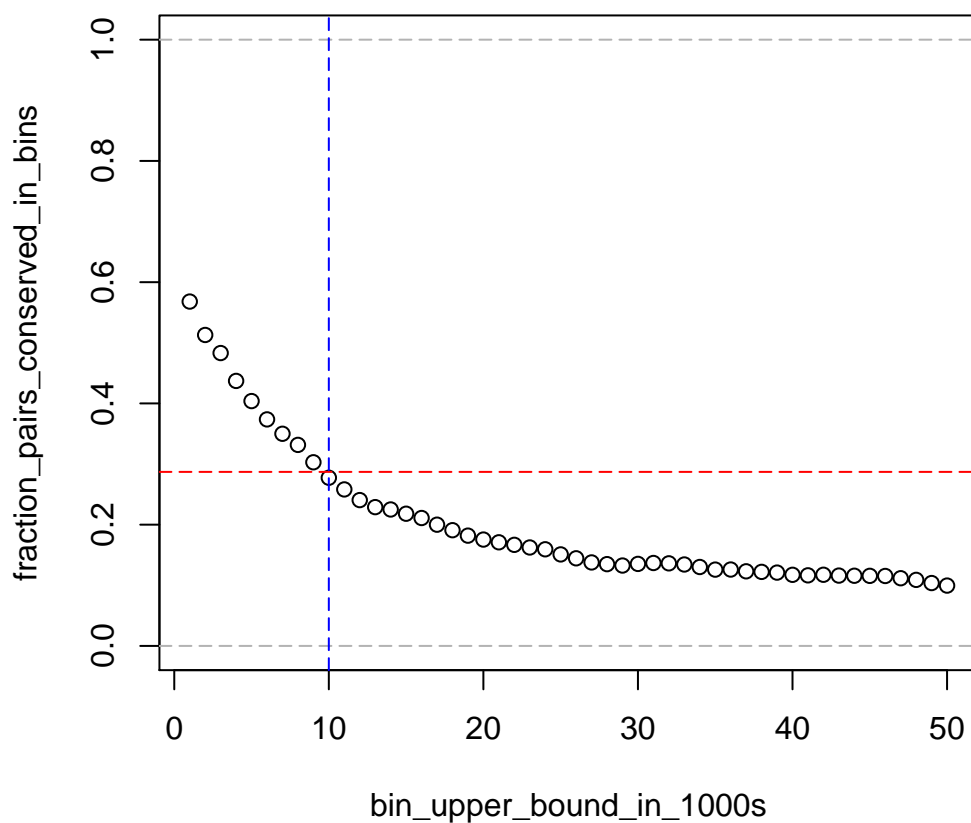

Supplement: s1 [file s1]

**Bin\_conservation\_minus\_bg\_MN0810.1\_vs\_NE-JV-3**  
**PD-0.111564**

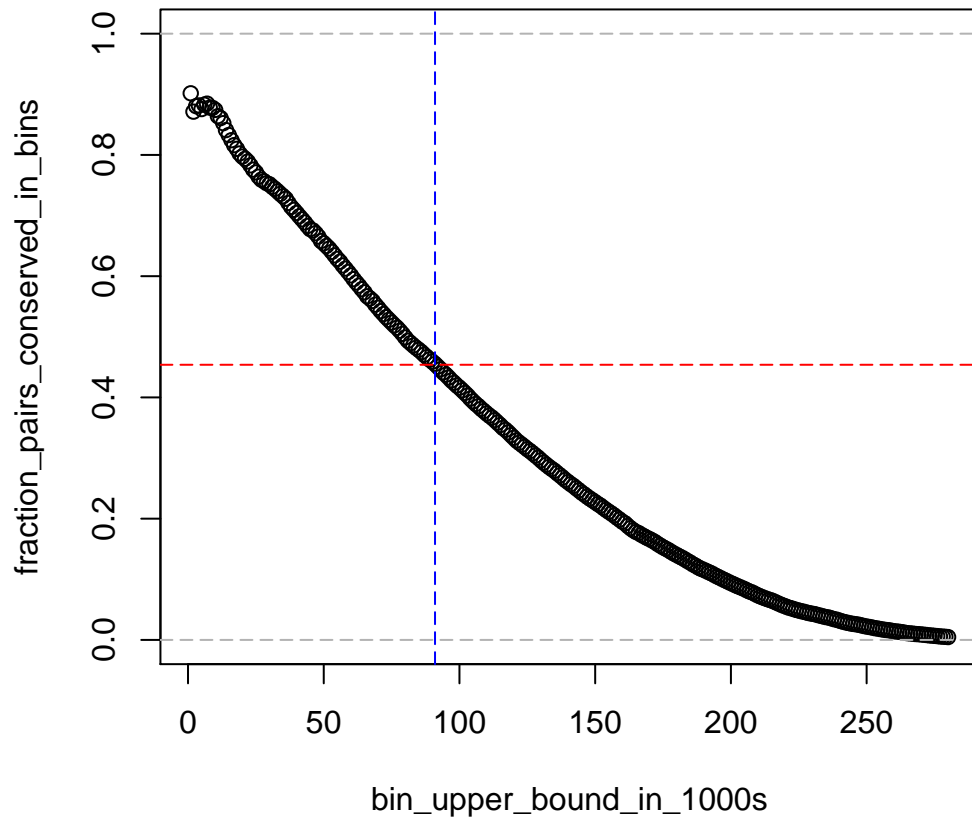

**Bin\_conservation\_minus\_bg\_MN0810.1\_vs\_NE-JV-3**  
**PD-0.111564**

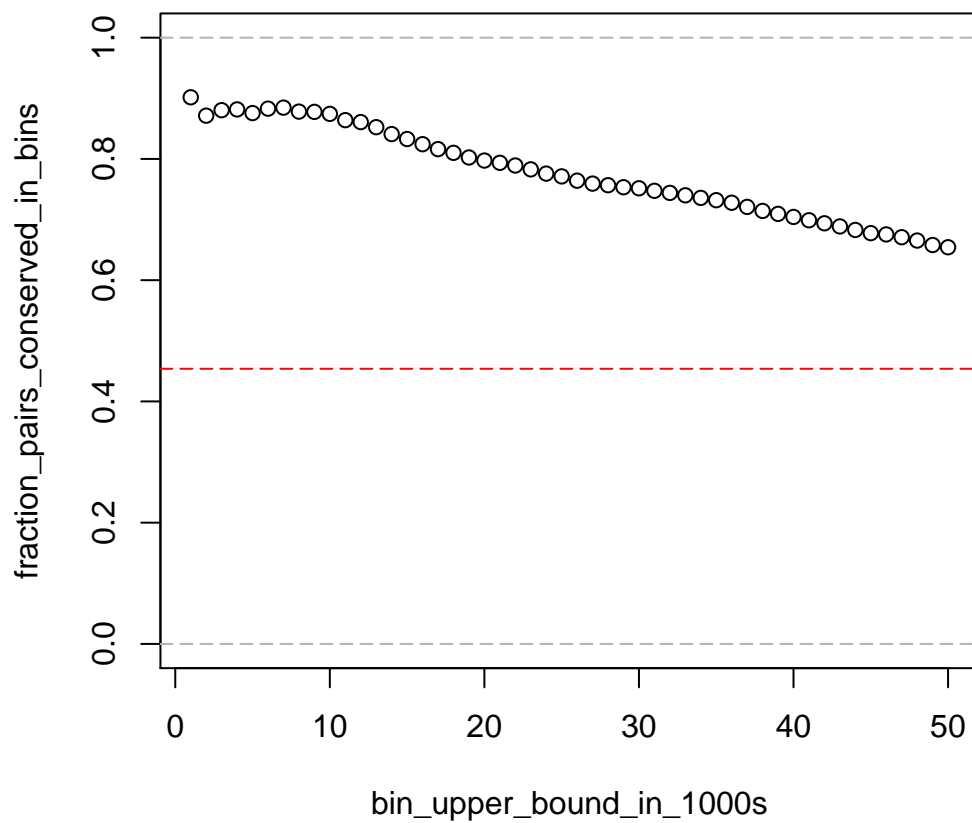

Supplement: s1 [file s1]

**Bin\_conservation\_minus\_bg\_Can18-4\_vs\_KS1B**  
**PD-0.661061**

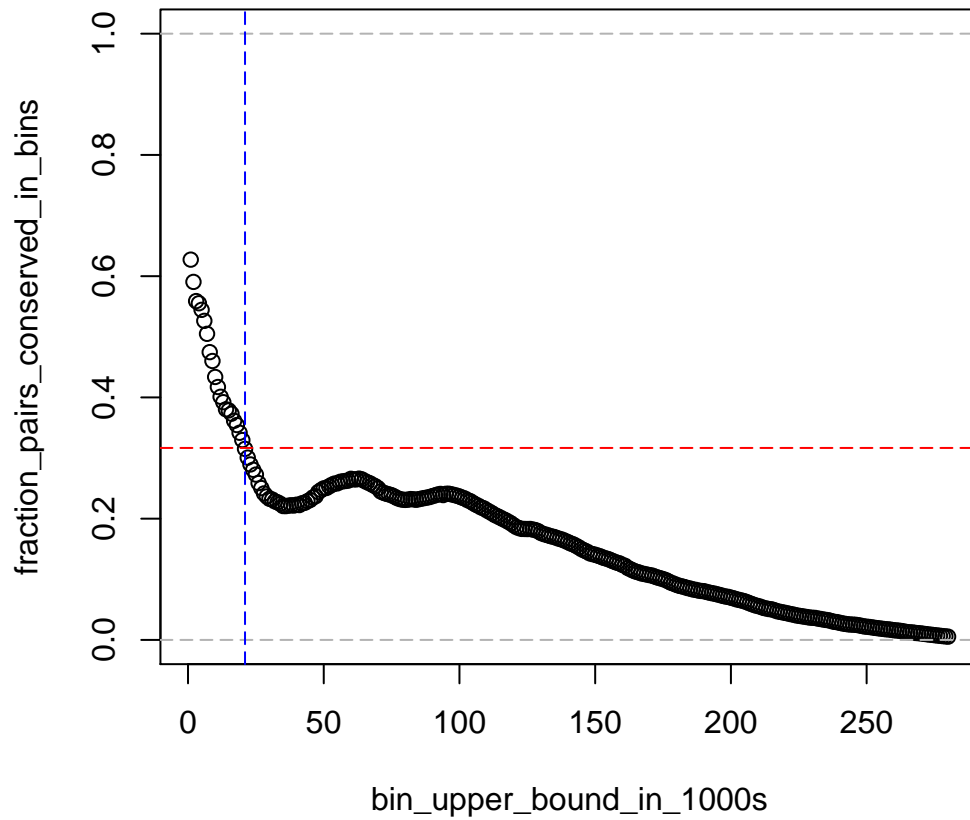

**Bin\_conservation\_minus\_bg\_Can18-4\_vs\_KS1B**  
**PD-0.661061**

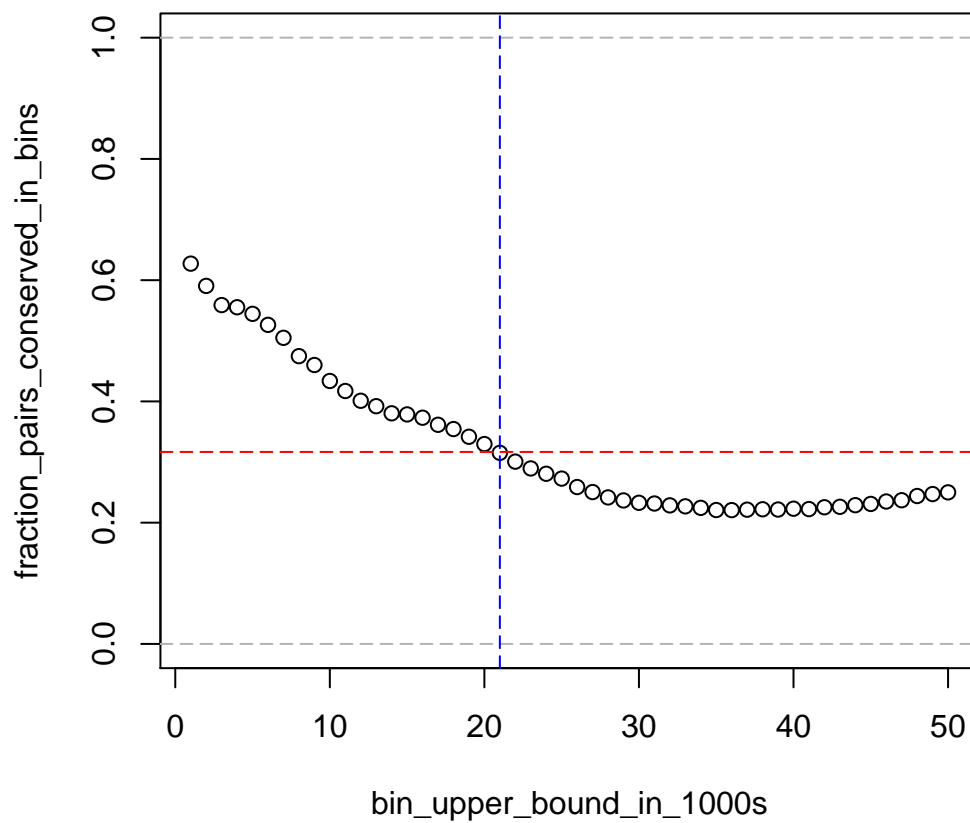

Supplement: s1 [file s1]

**Bin\_conservation\_minus\_bg\_Fr5L\_vs\_NTS-1**  
**PD-0.454183**

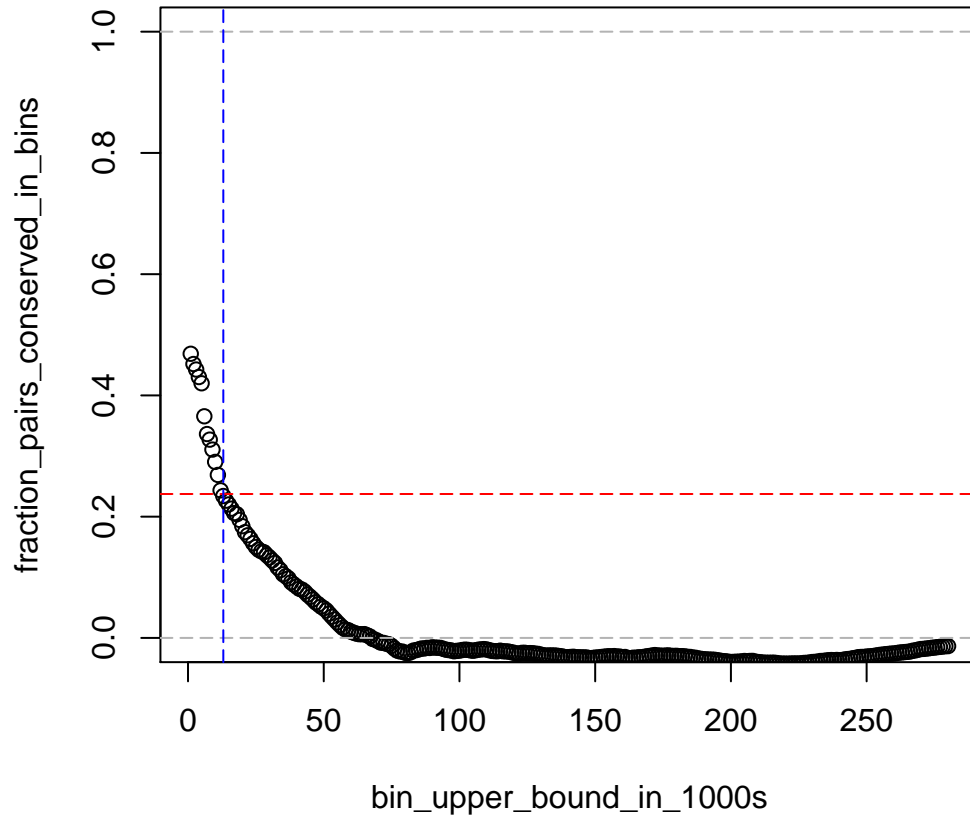

**Bin\_conservation\_minus\_bg\_Fr5L\_vs\_NTS-1**  
**PD-0.454183**

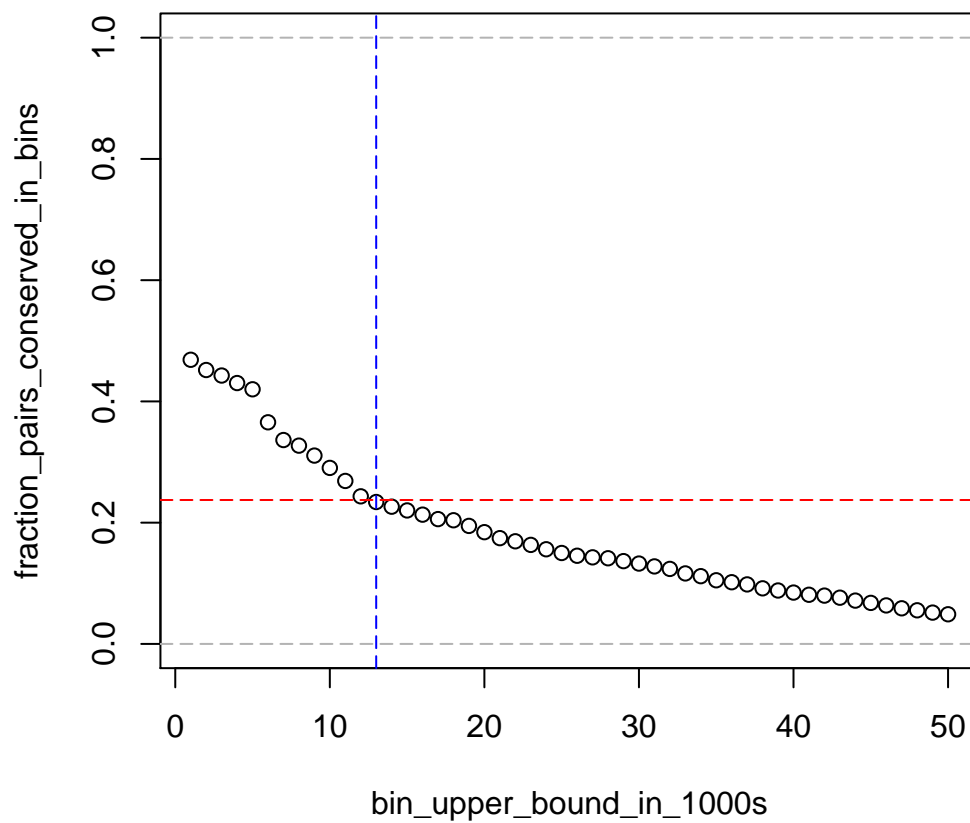

Supplement: s1 [file s1]

**Bin\_conservation\_minus\_bg\_CVB-1\_vs\_TN603.4.2**  
**PD-0.465539**

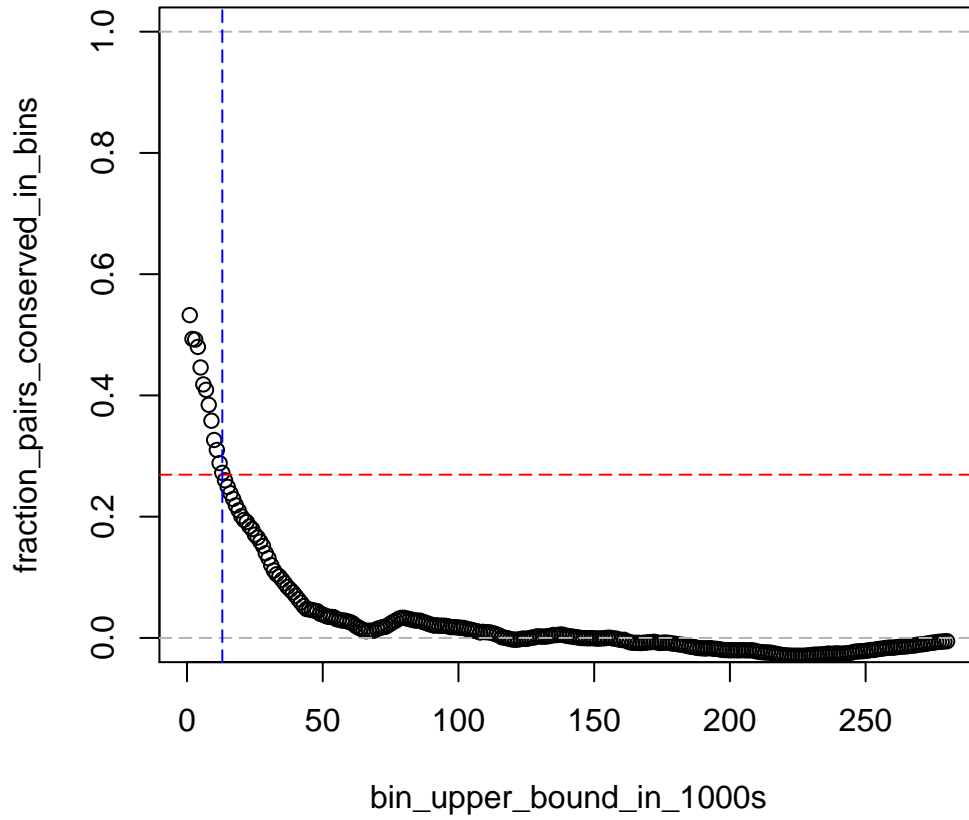

**Bin\_conservation\_minus\_bg\_CVB-1\_vs\_TN603.4.2**  
**PD-0.465539**

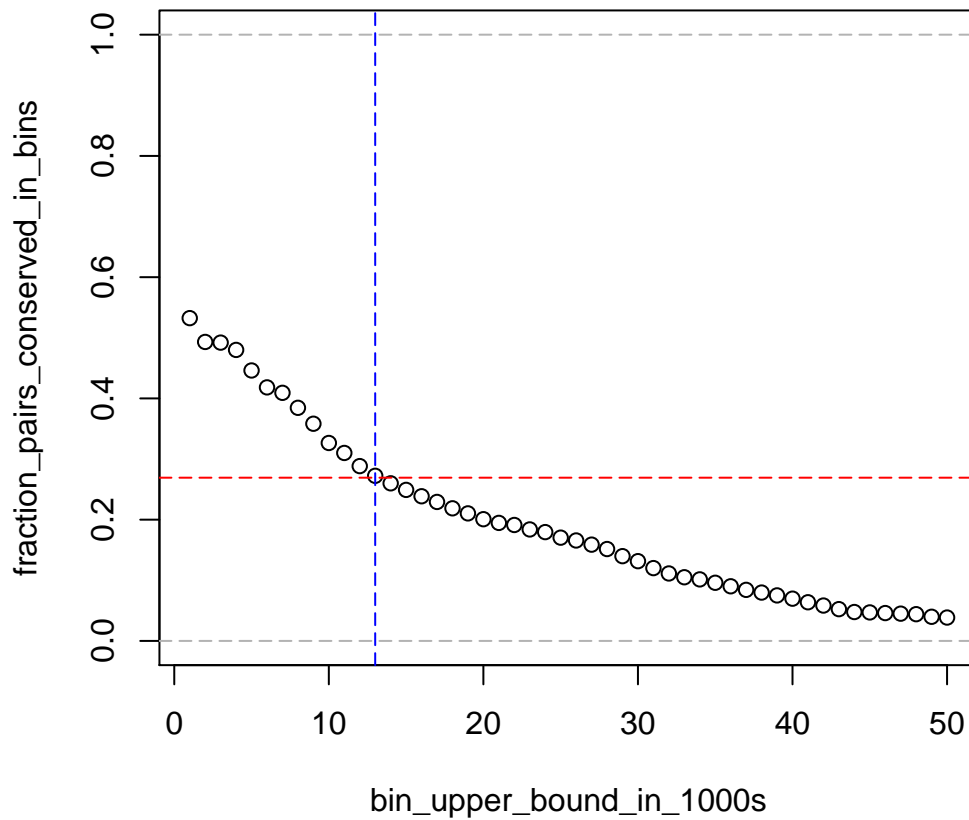

Supplement: s1 [file s1]

**Bin\_conservation\_minus\_bg\_NE-JV-2\_vs\_PBCV1**  
**PD-0.676698**

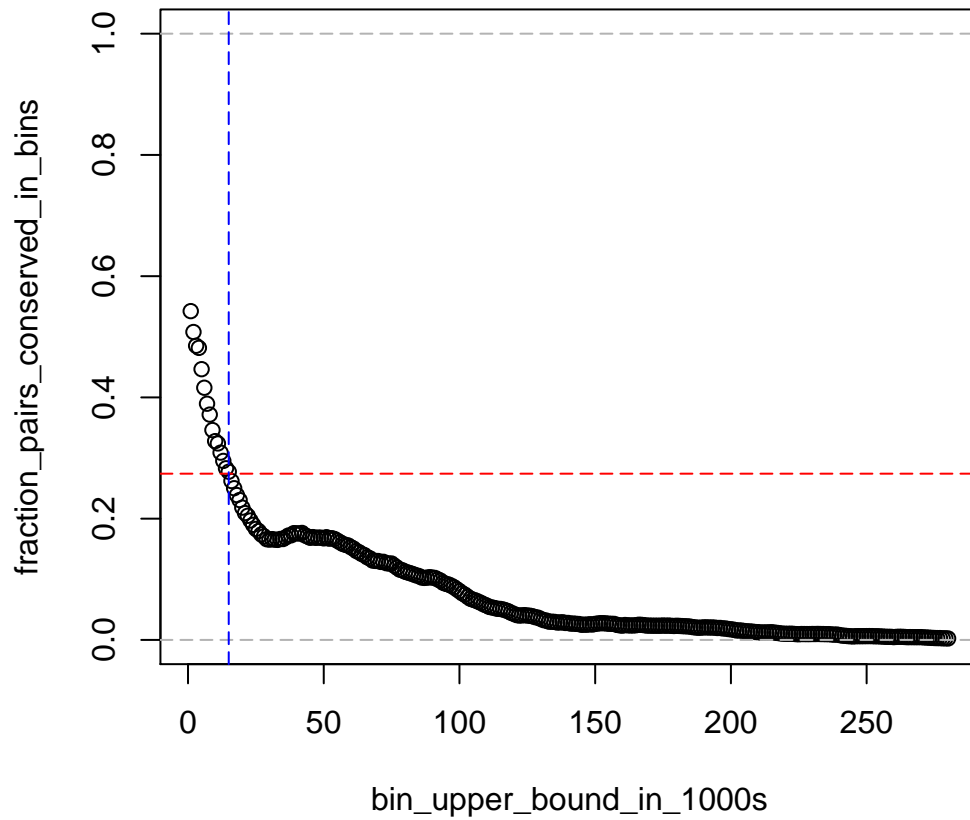

**Bin\_conservation\_minus\_bg\_NE-JV-2\_vs\_PBCV1**  
**PD-0.676698**

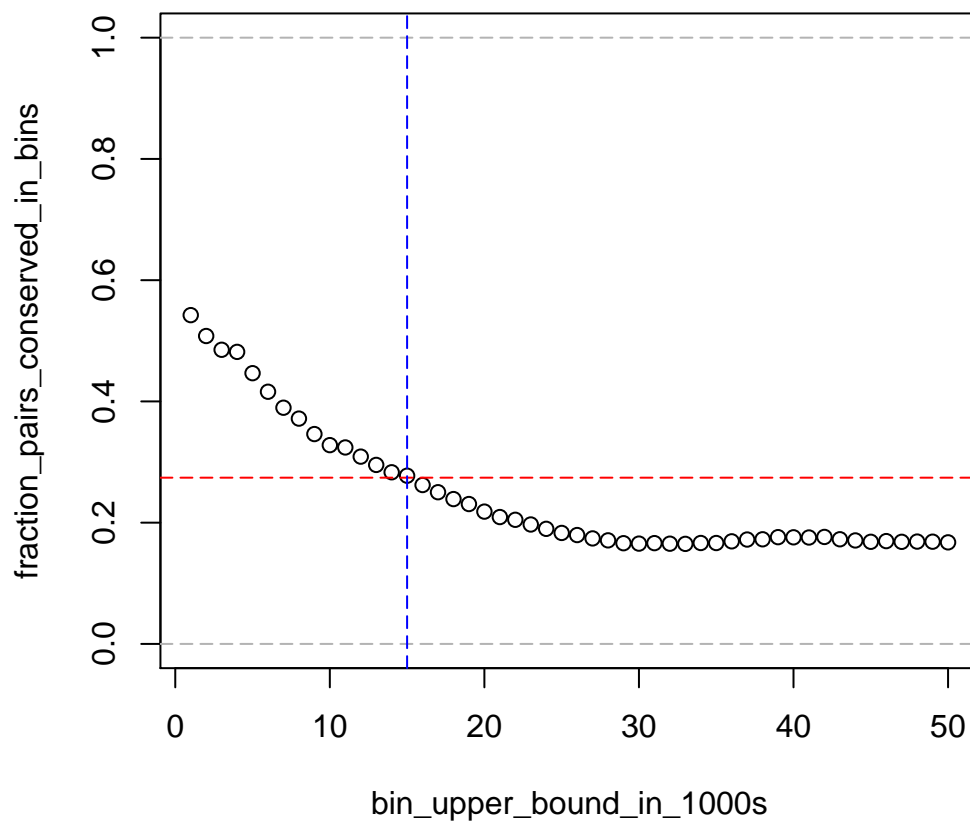

Supplement: s1 [file s1]

**Bin\_conservation\_minus\_bg\_MN0810.1\_vs\_OR0704.2.2**  
**PD-0.457126**

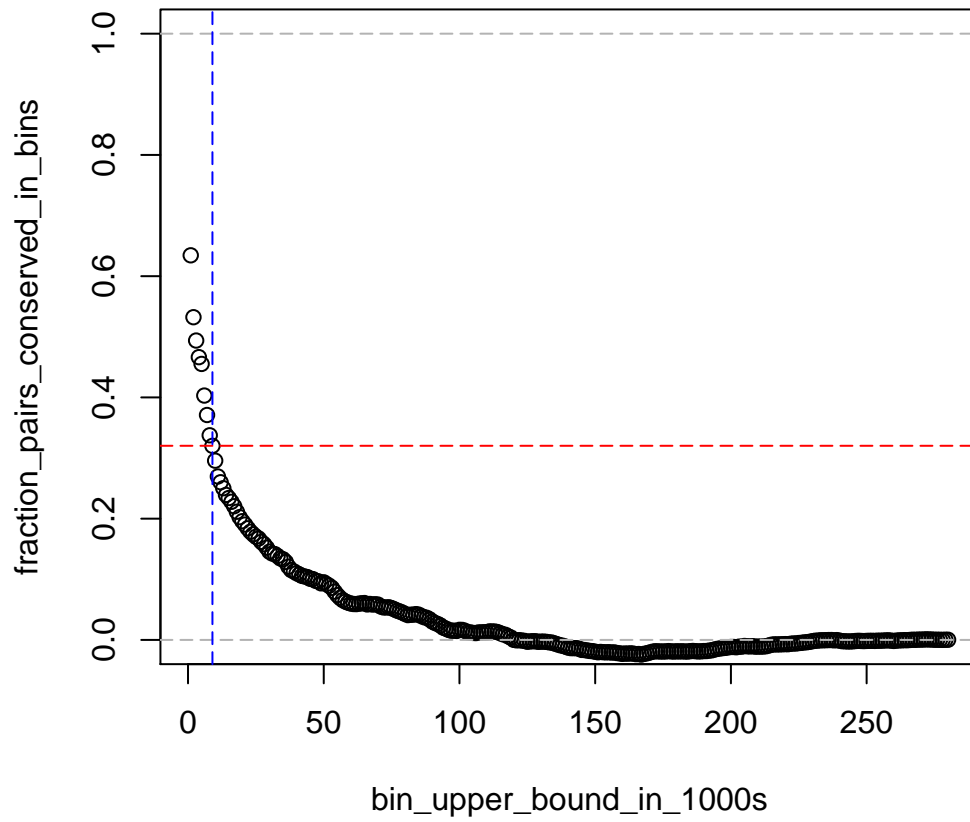

**Bin\_conservation\_minus\_bg\_MN0810.1\_vs\_OR0704.2.2**  
**PD-0.457126**

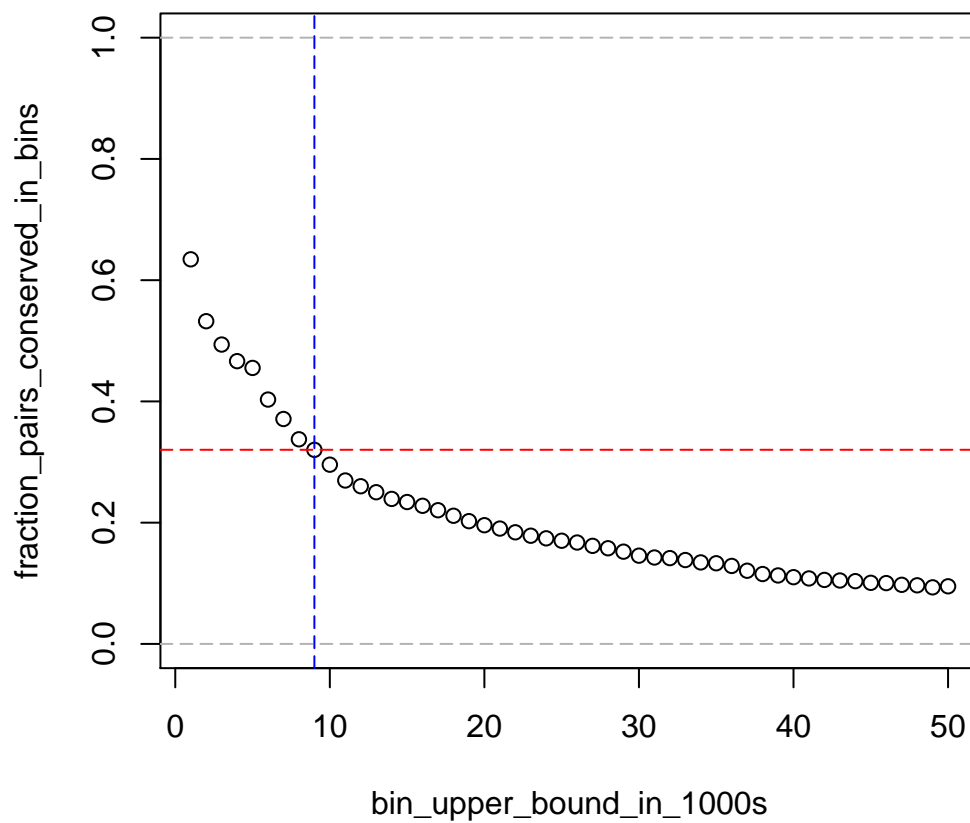

Supplement: s1 [file s1]

**Bin\_conservation\_minus\_bg\_KS1B\_vs\_NYs-1**  
**PD-0.146719**

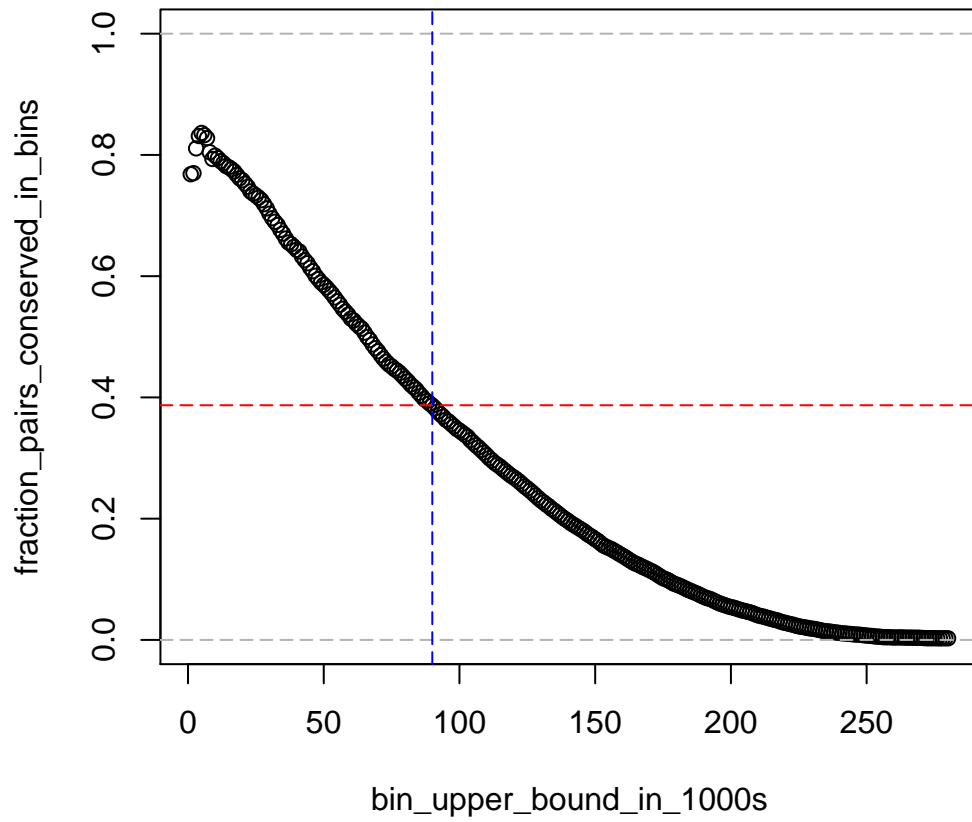

**Bin\_conservation\_minus\_bg\_KS1B\_vs\_NYs-1**  
**PD-0.146719**

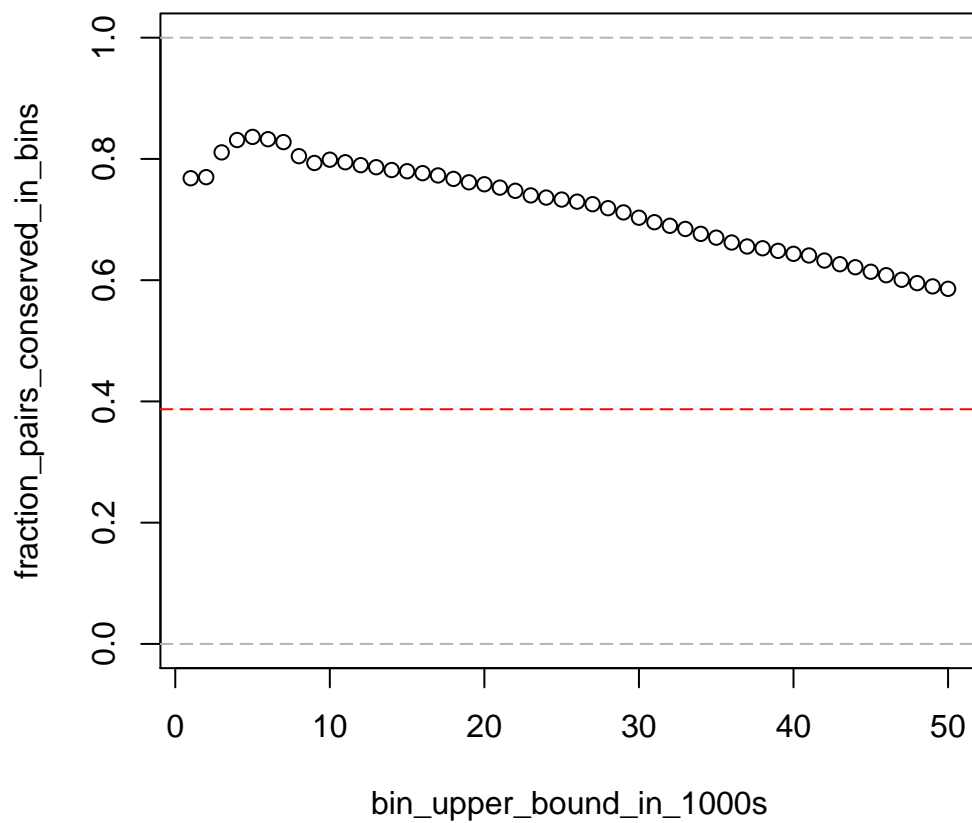

Supplement: s1 [file s1]

**Bin\_conservation\_minus\_bg\_ATCV1\_vs\_NE-JV-1**  
**PD-0.493238**

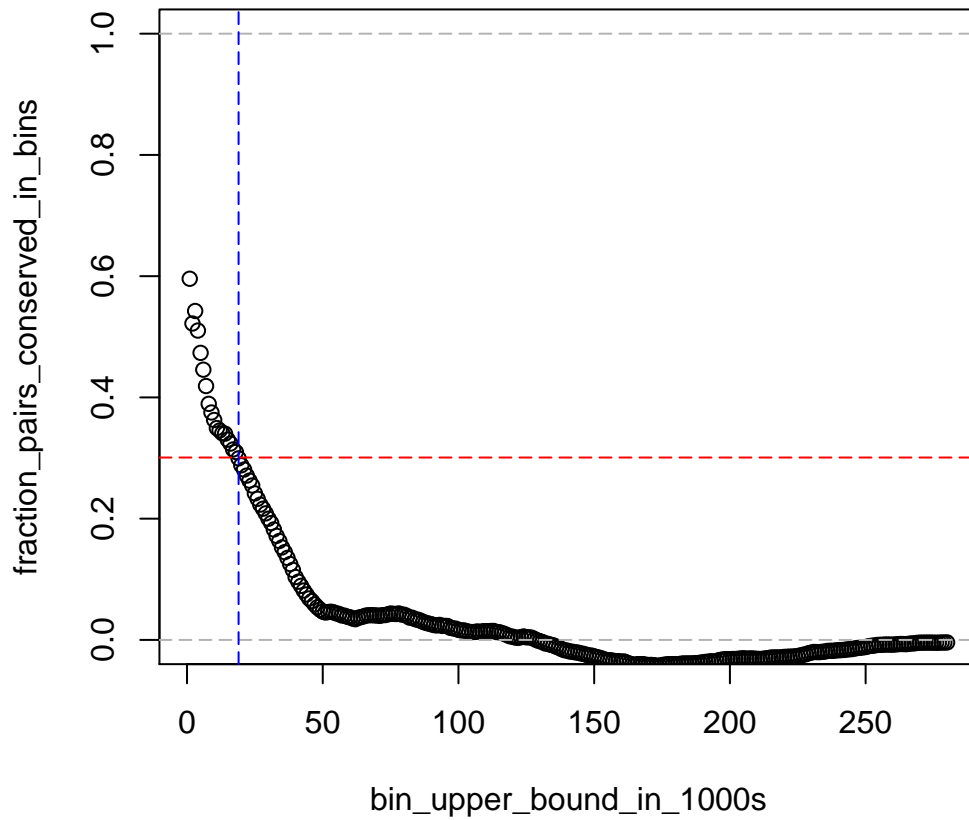

**Bin\_conservation\_minus\_bg\_ATCV1\_vs\_NE-JV-1**  
**PD-0.493238**

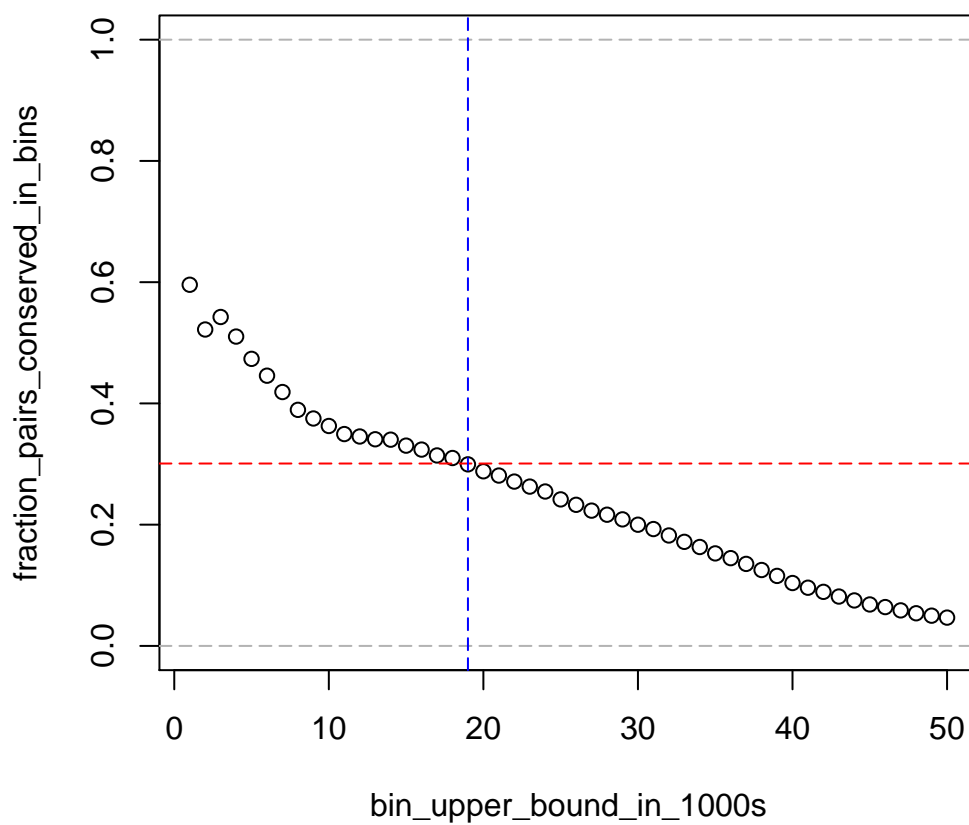

Supplement: s1 [file s1]

**Bin\_conservation\_minus\_bg\_GM0701.1\_vs\_WI0606**  
**PD-0.065842**

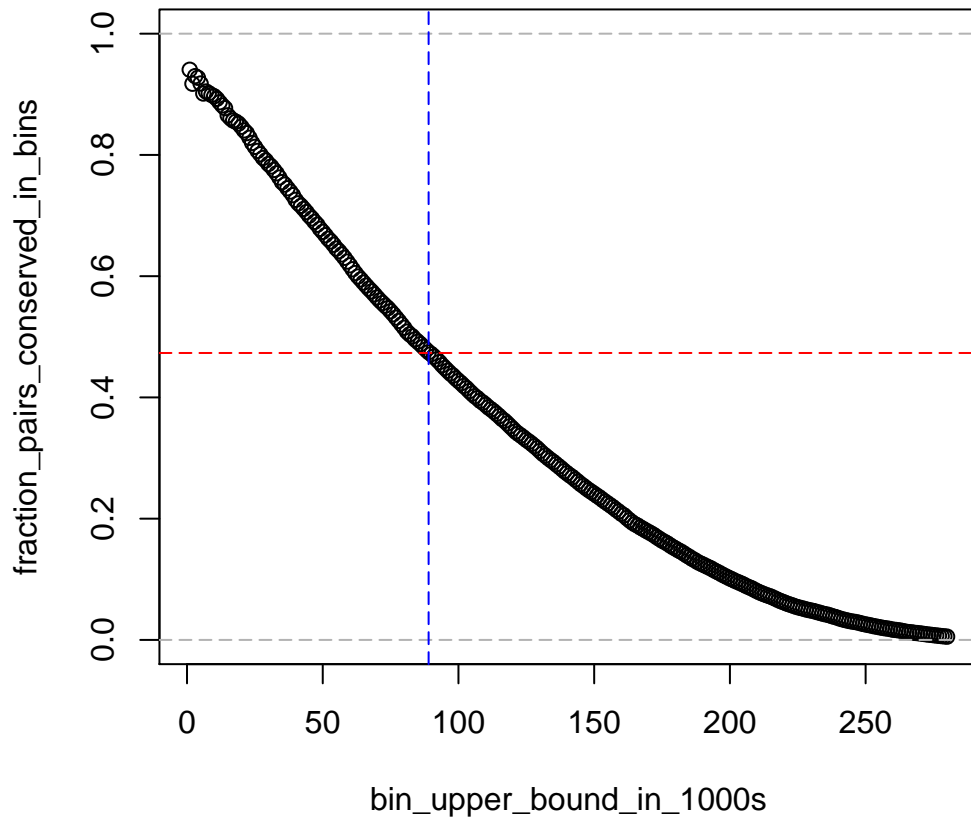

**Bin\_conservation\_minus\_bg\_GM0701.1\_vs\_WI0606**  
**PD-0.065842**

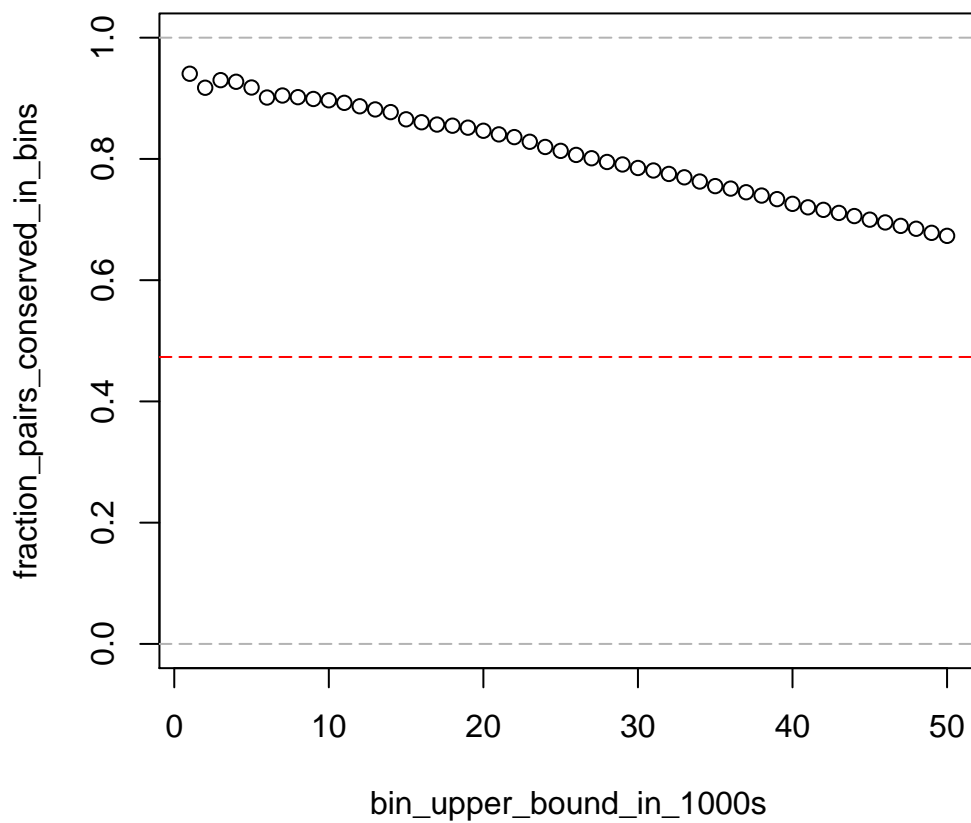

Supplement: s1 [file s1]

**Bin\_conservation\_minus\_bg\_CVA-1\_vs\_CVB-1**  
**PD-0.029132**

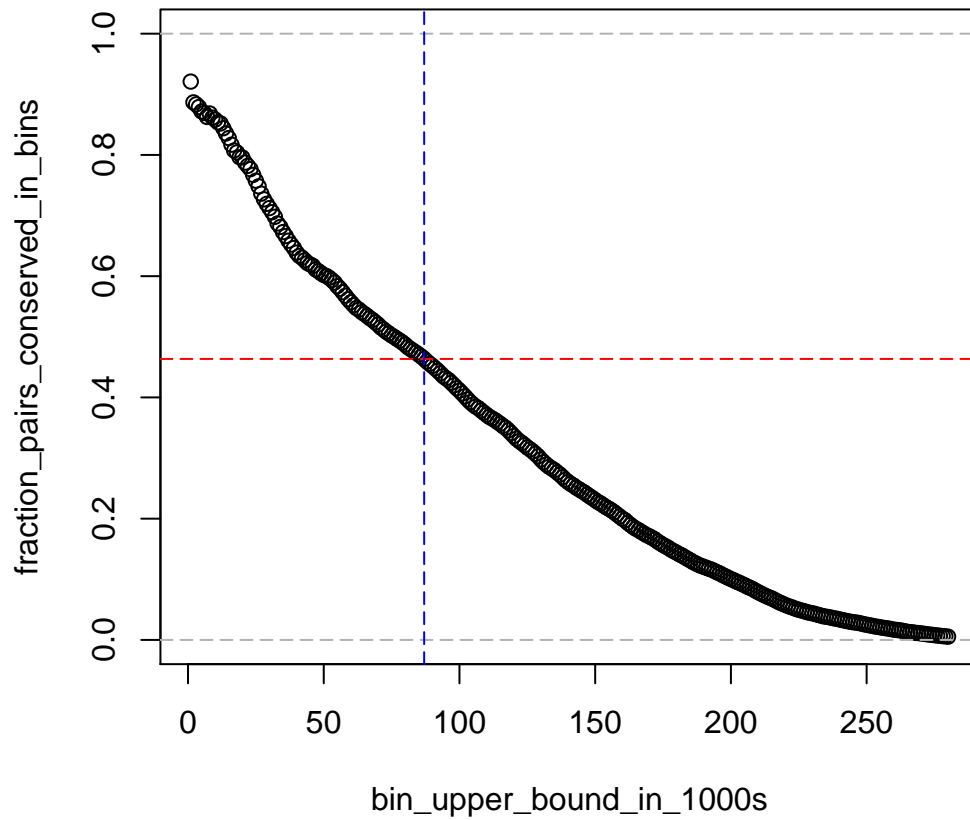

**Bin\_conservation\_minus\_bg\_CVA-1\_vs\_CVB-1**  
**PD-0.029132**

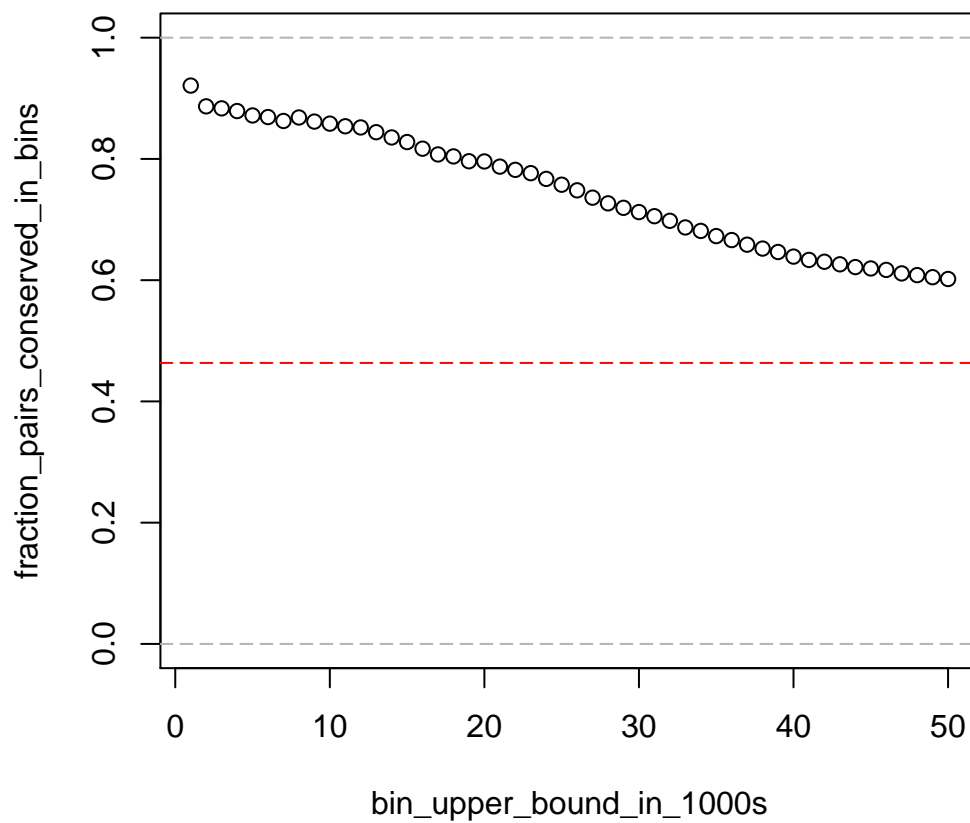

Supplement: s1 [file s1]

**Bin\_conservation\_minus\_bg\_NY2A\_vs\_TN603.4.2**  
**PD-0.699565**

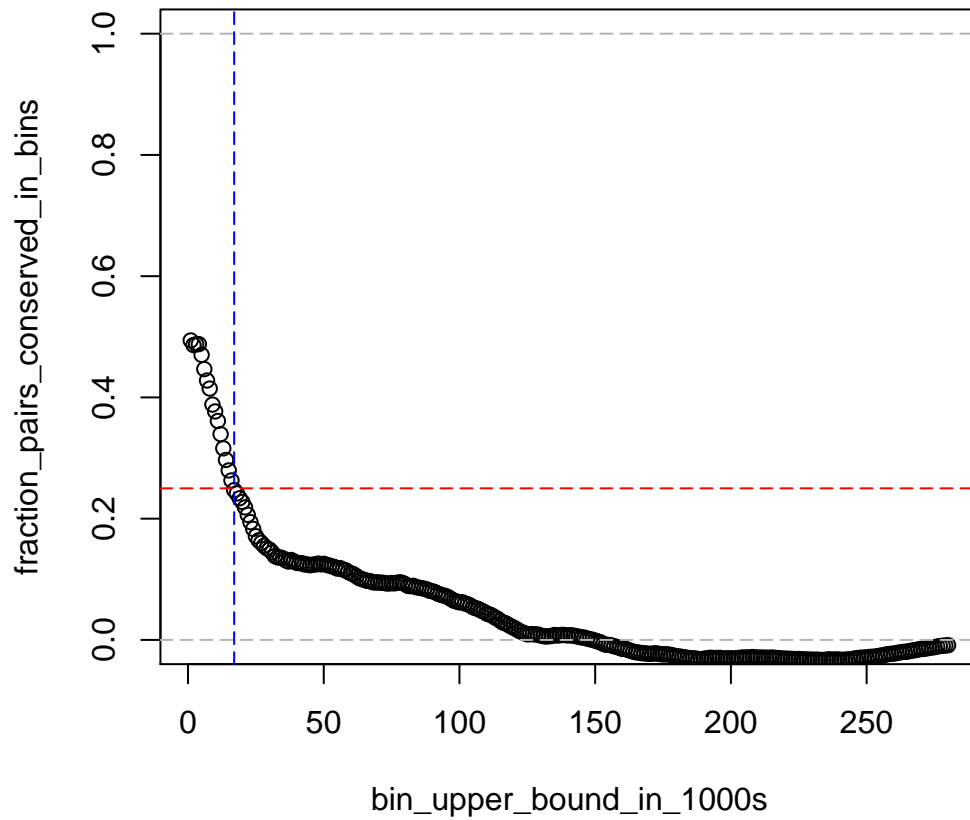

**Bin\_conservation\_minus\_bg\_NY2A\_vs\_TN603.4.2**  
**PD-0.699565**

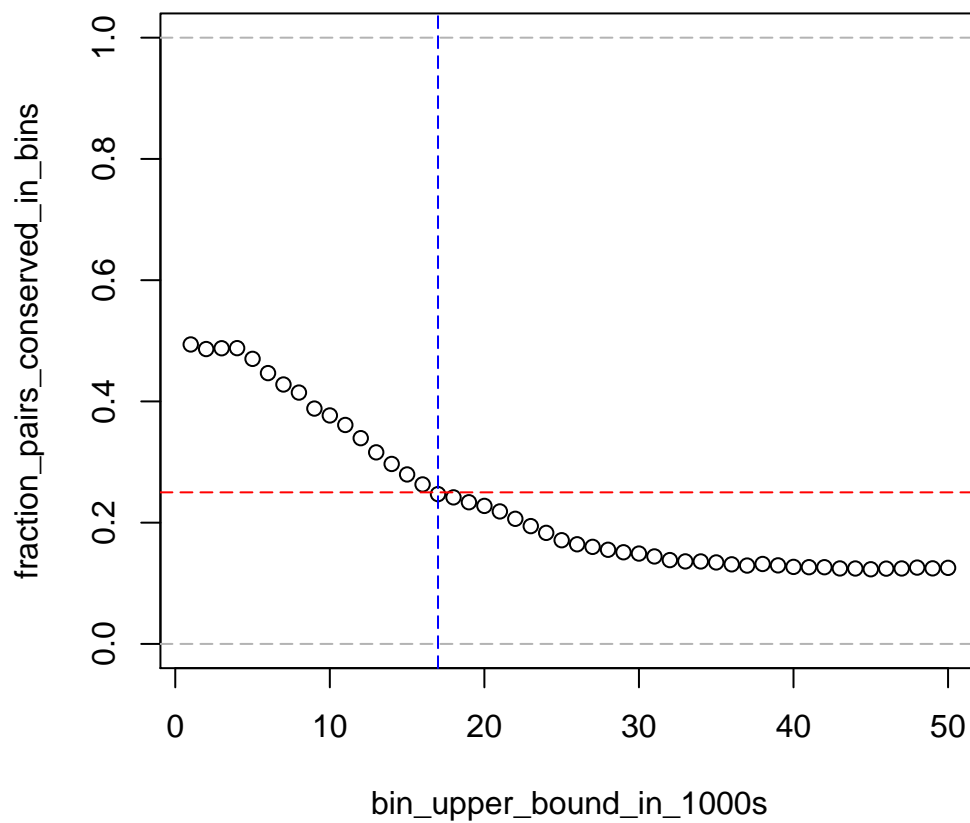

Supplement: s1 [file s1]

**Bin\_conservation\_minus\_bg\_OR0704.2.2\_vs\_PBCV1**  
**PD-0.634051**

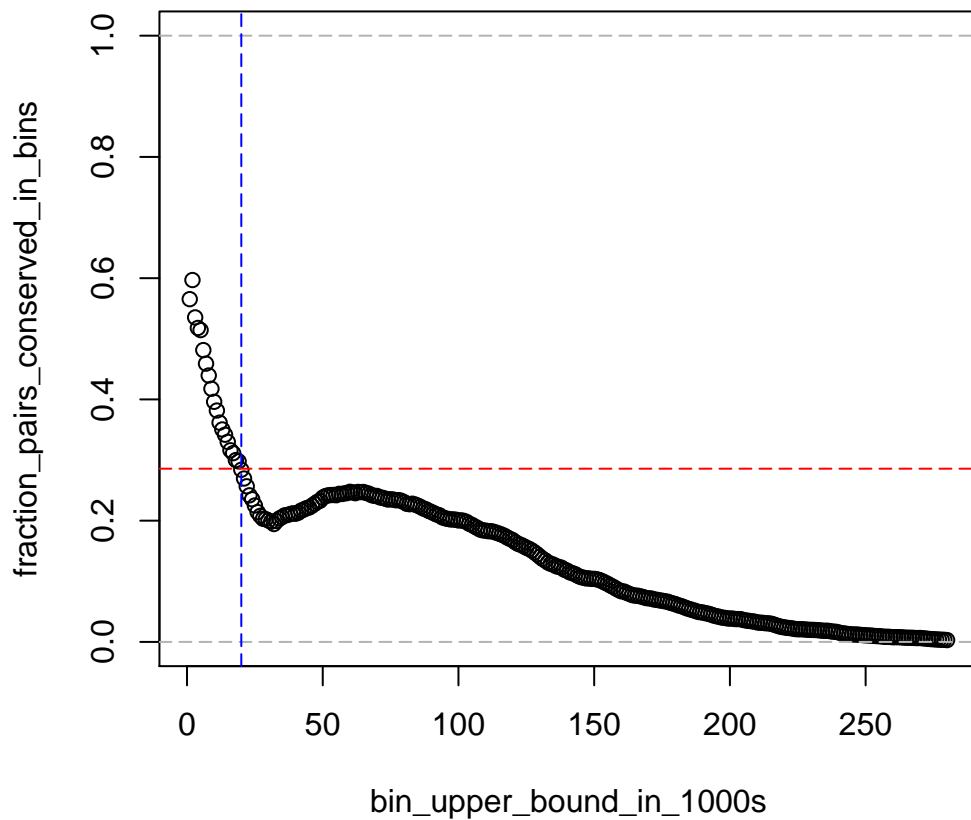

**Bin\_conservation\_minus\_bg\_OR0704.2.2\_vs\_PBCV1**  
**PD-0.634051**

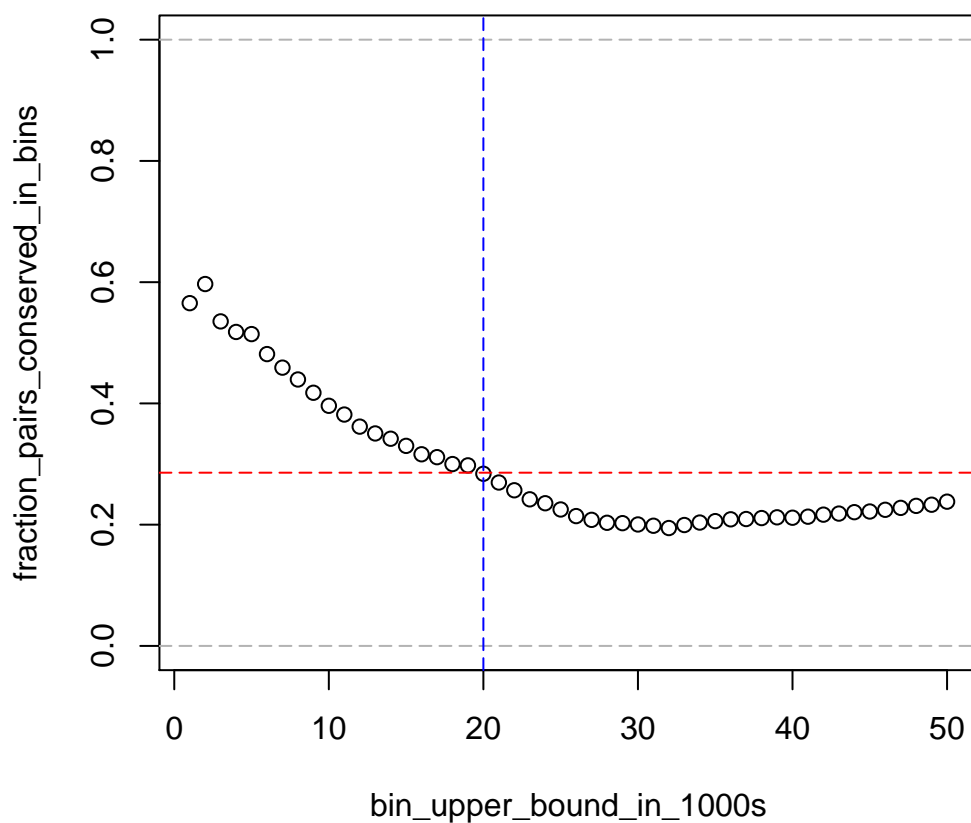

Supplement: s1 [file s1]

**Bin\_conservation\_minus\_bg\_Can18-4\_vs\_Canal-1**  
**PD-0.470375**

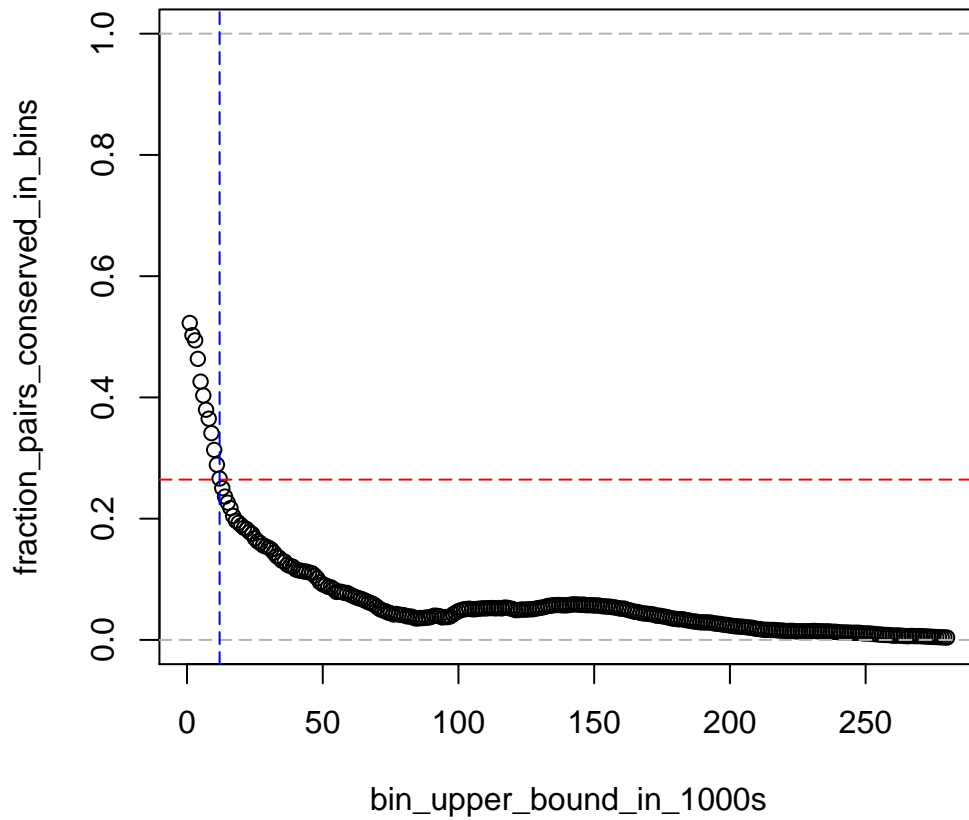

**Bin\_conservation\_minus\_bg\_Can18-4\_vs\_Canal-1**  
**PD-0.470375**

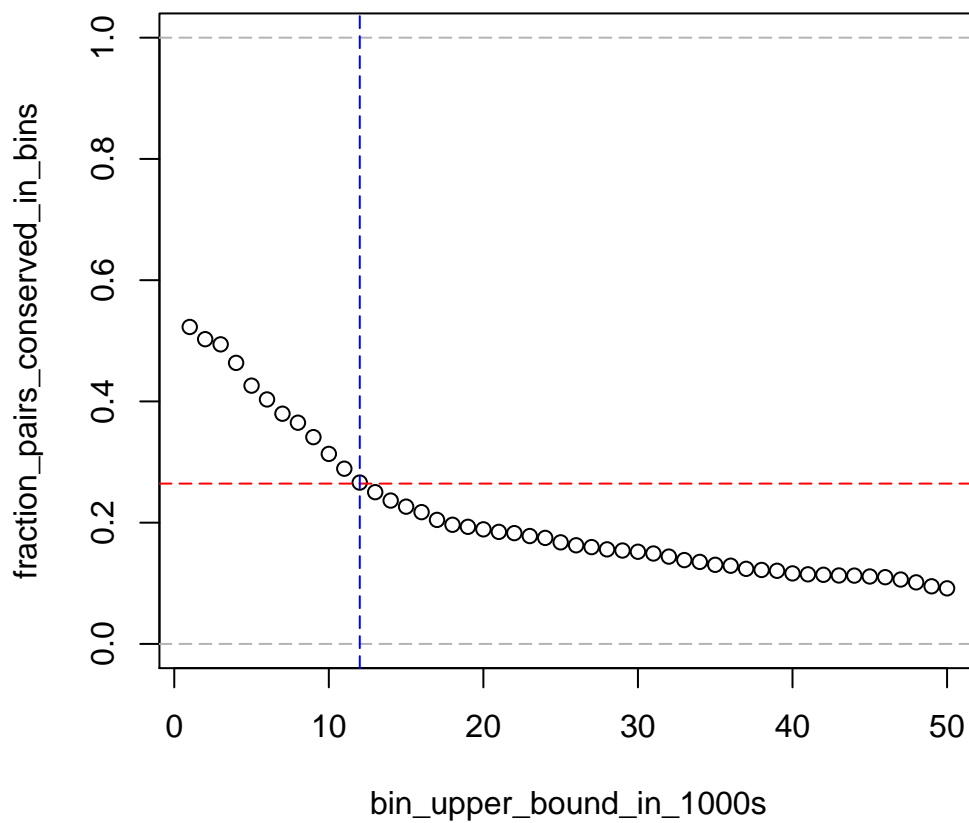

Supplement: s1 [file s1]

**Bin\_conservation\_minus\_bg\_NE-JV-2\_vs\_NTS-1**  
**PD-0.048074**

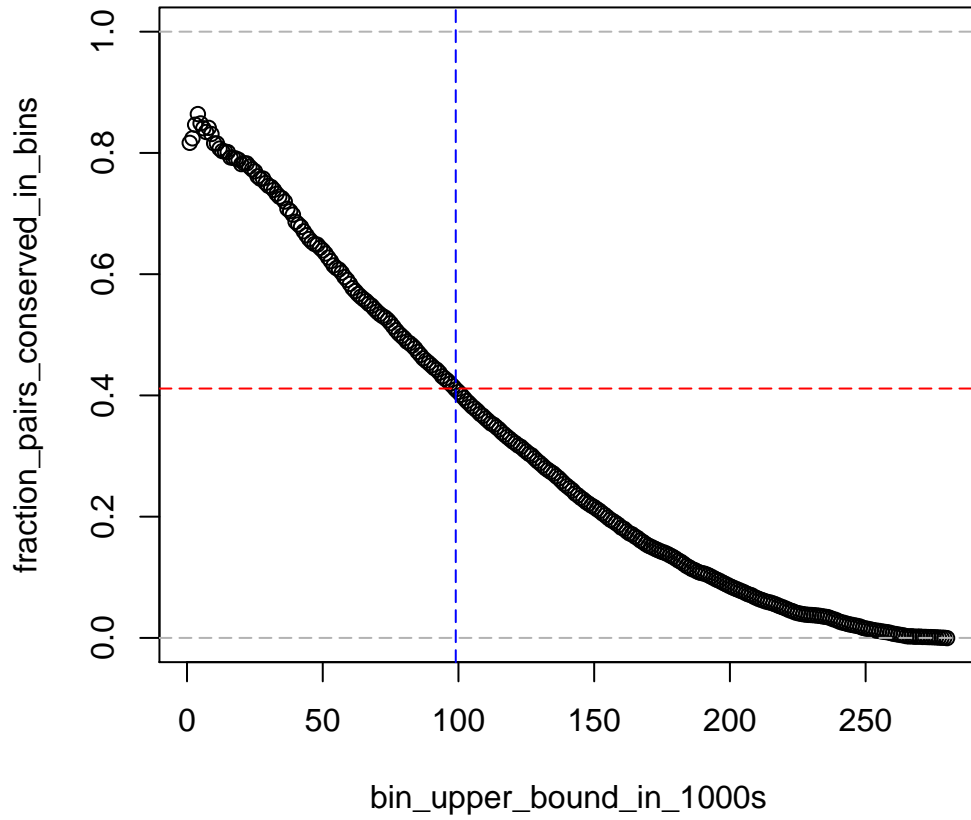

**Bin\_conservation\_minus\_bg\_NE-JV-2\_vs\_NTS-1**  
**PD-0.048074**

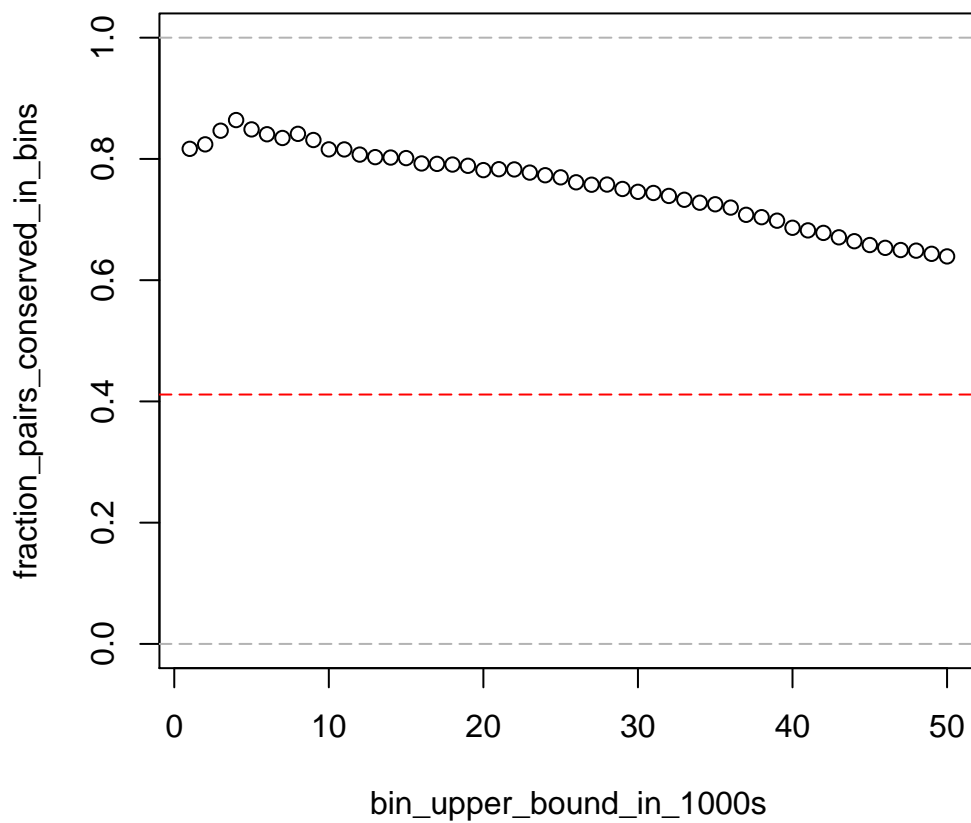

Supplement: s1 [file s1]

**Bin\_conservation\_minus\_bg\_NE-JV-4\_vs\_NYs-1**  
**PD-0.134993**

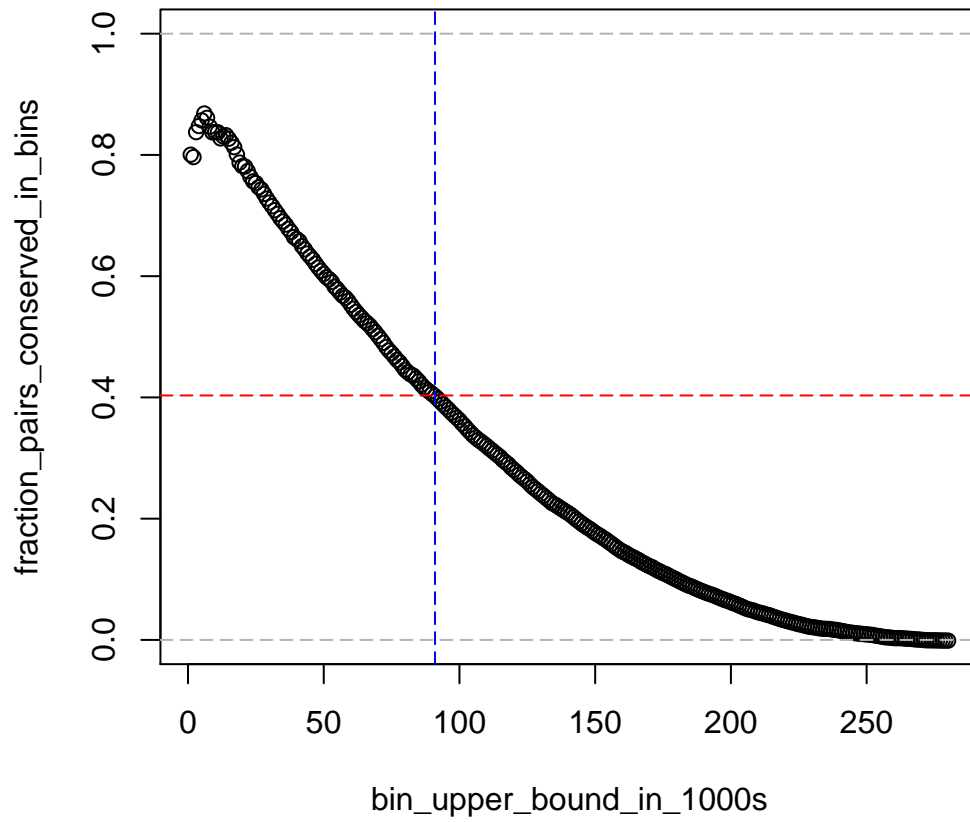

**Bin\_conservation\_minus\_bg\_NE-JV-4\_vs\_NYs-1**  
**PD-0.134993**

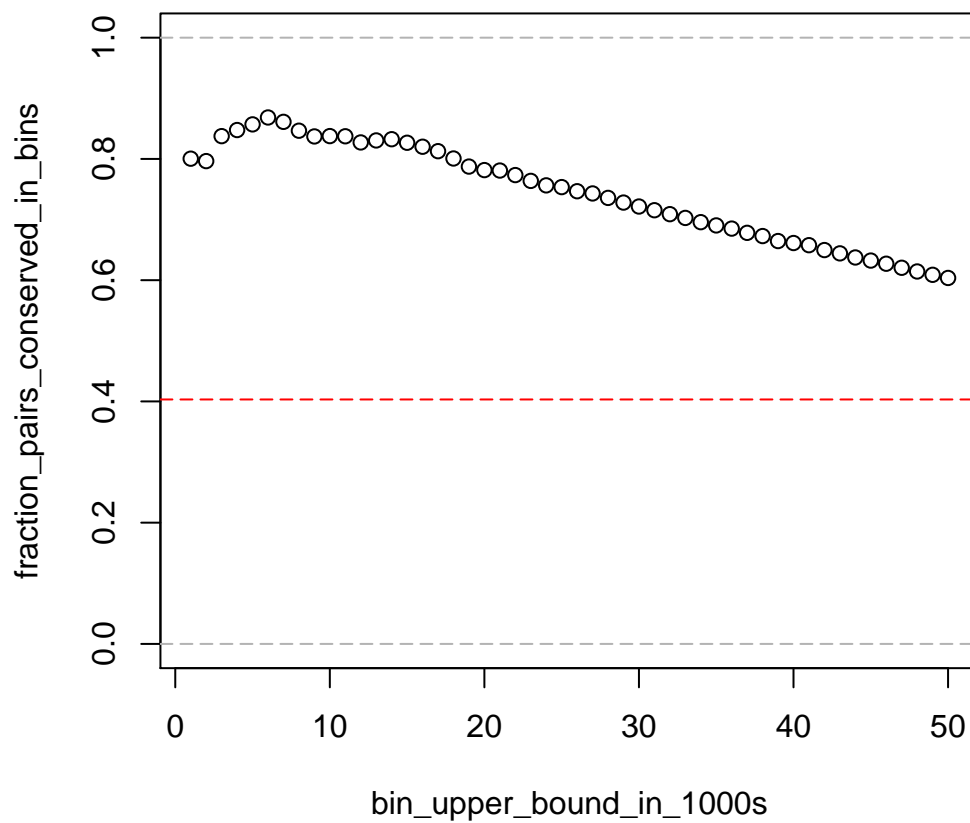

Supplement: s1 [file s1]

**Bin\_conservation\_minus\_bg\_Canal-1\_vs\_NYs-1**  
**PD-0.703259**

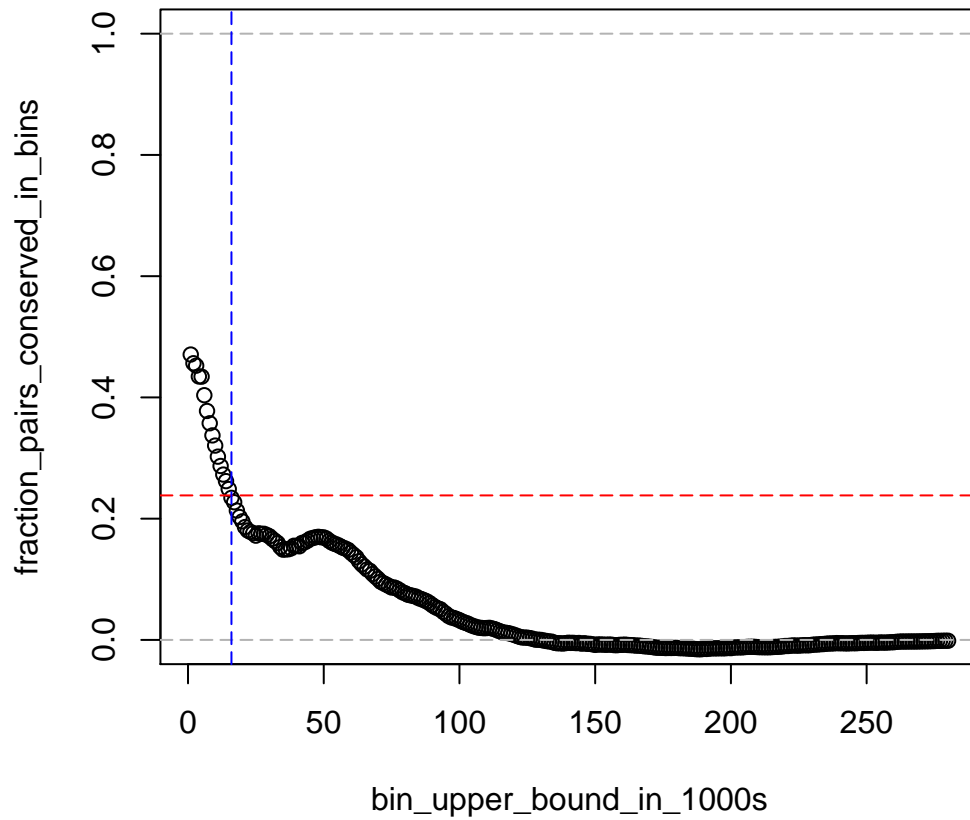

**Bin\_conservation\_minus\_bg\_Canal-1\_vs\_NYs-1**  
**PD-0.703259**

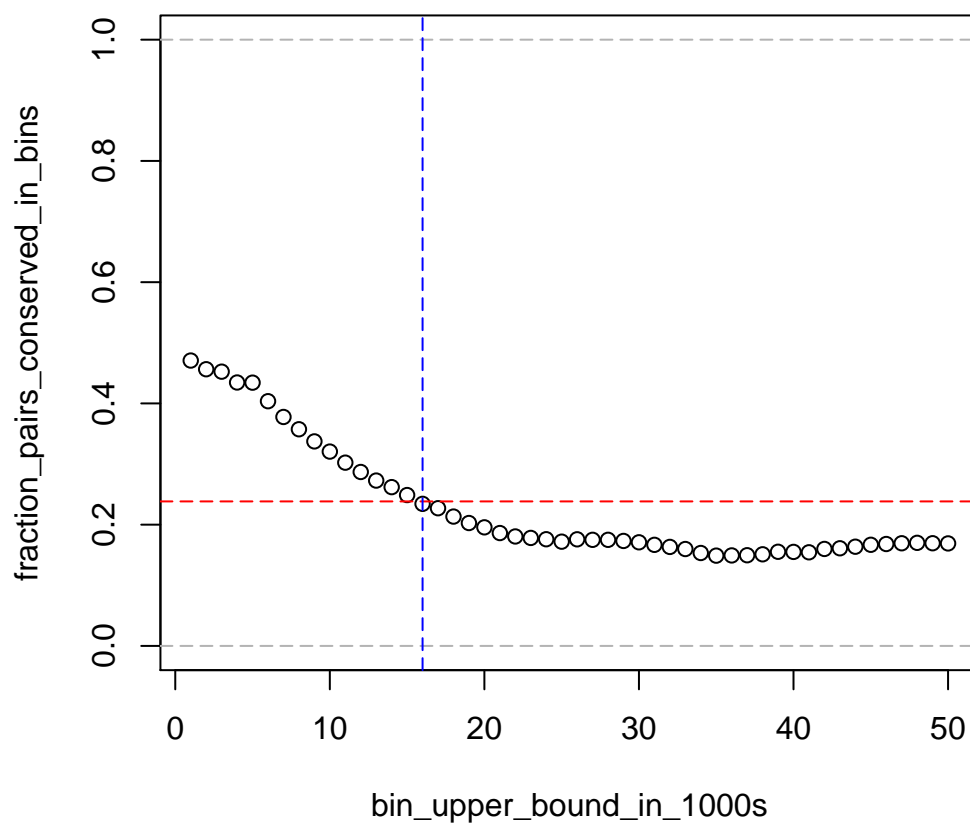

Supplement: s1 [file s1]

**Bin\_conservation\_minus\_bg\_CVM-1\_vs\_NE-JV-4**  
**PD-0.638948**

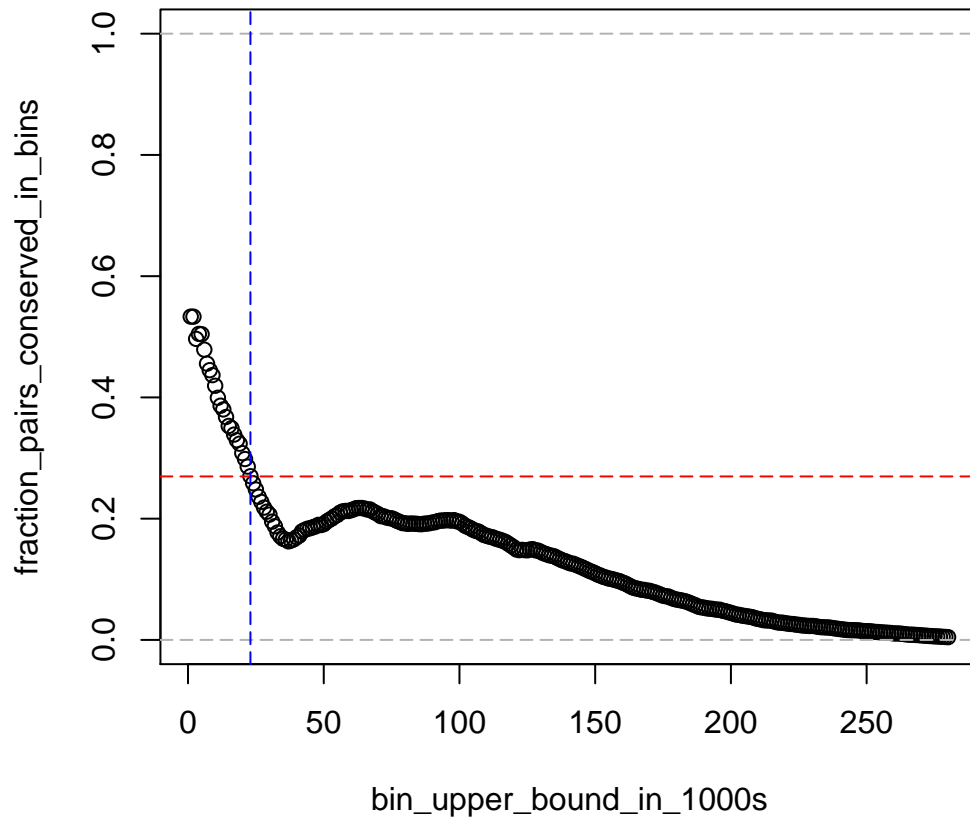

**Bin\_conservation\_minus\_bg\_CVM-1\_vs\_NE-JV-4**  
**PD-0.638948**

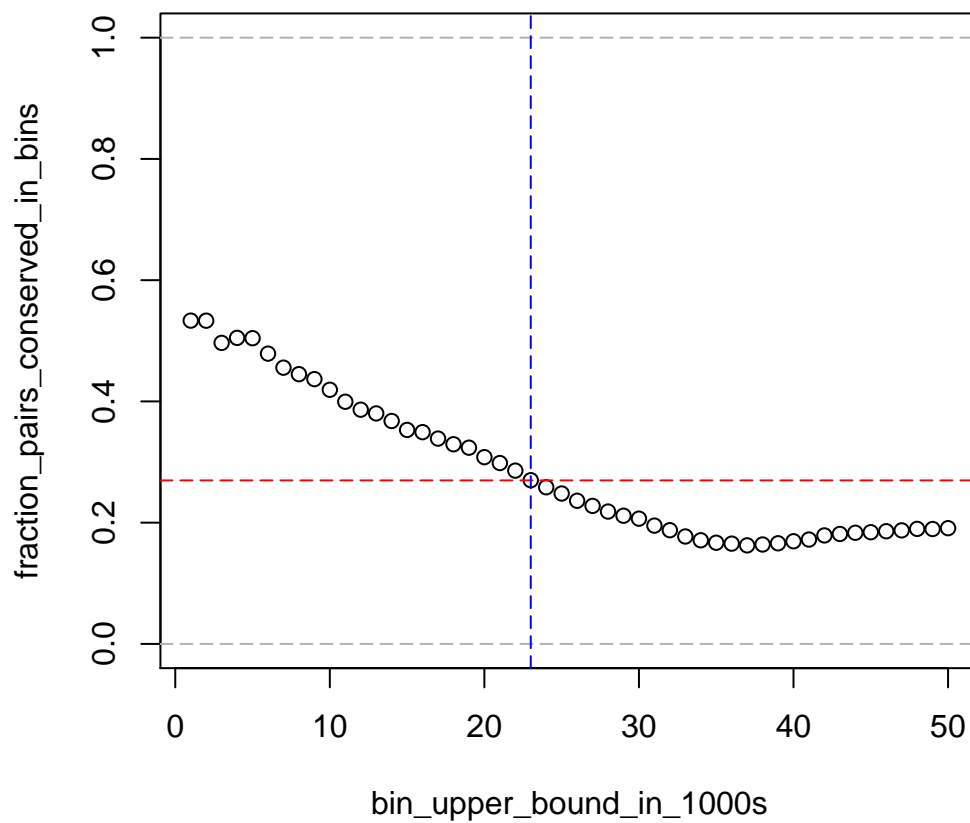

Supplement: s1 [file s1]

**Bin\_conservation\_minus\_bg\_NE-JV-4\_vs\_OR0704.3**  
**PD-0.681914**

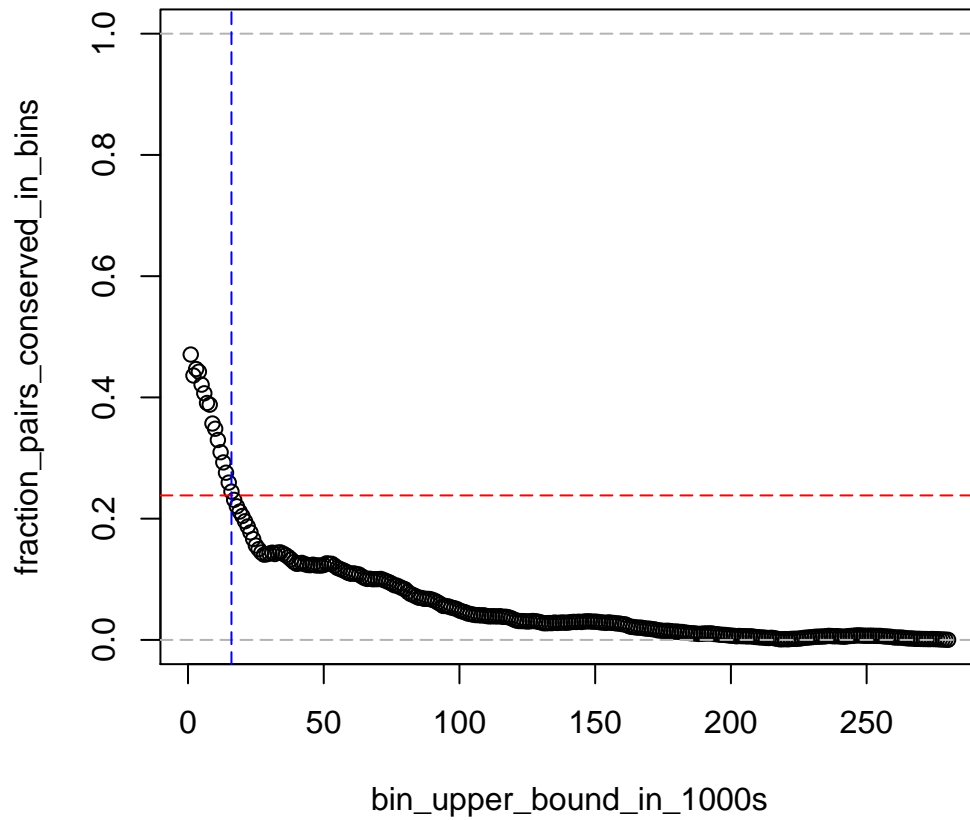

**Bin\_conservation\_minus\_bg\_NE-JV-4\_vs\_OR0704.3**  
**PD-0.681914**

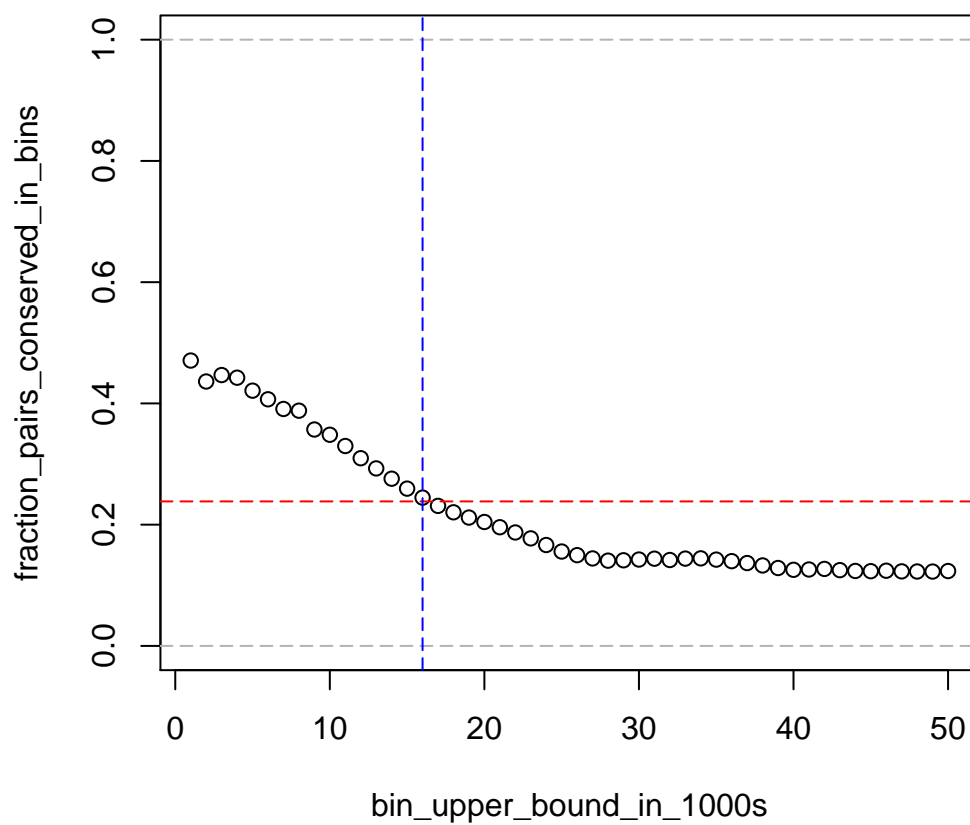

Supplement: s1 [file s1]

**Bin\_conservation\_minus\_bg\_Can0610SP\_vs\_WI0606**  
**PD-0.018755**

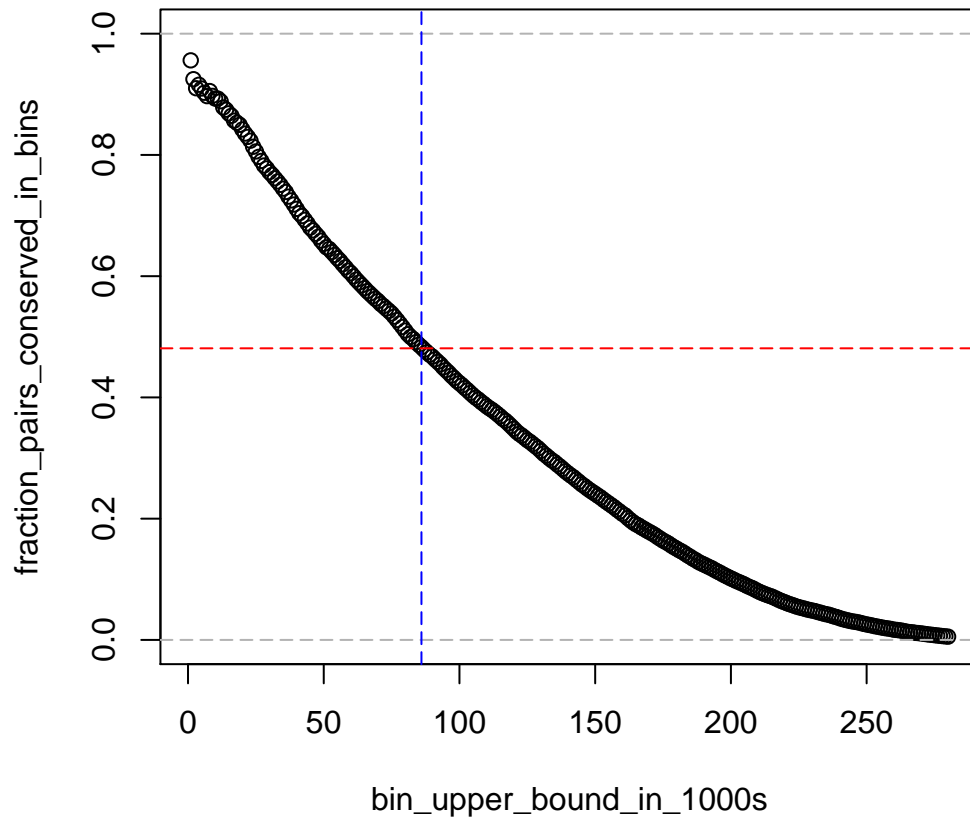

**Bin\_conservation\_minus\_bg\_Can0610SP\_vs\_WI0606**  
**PD-0.018755**

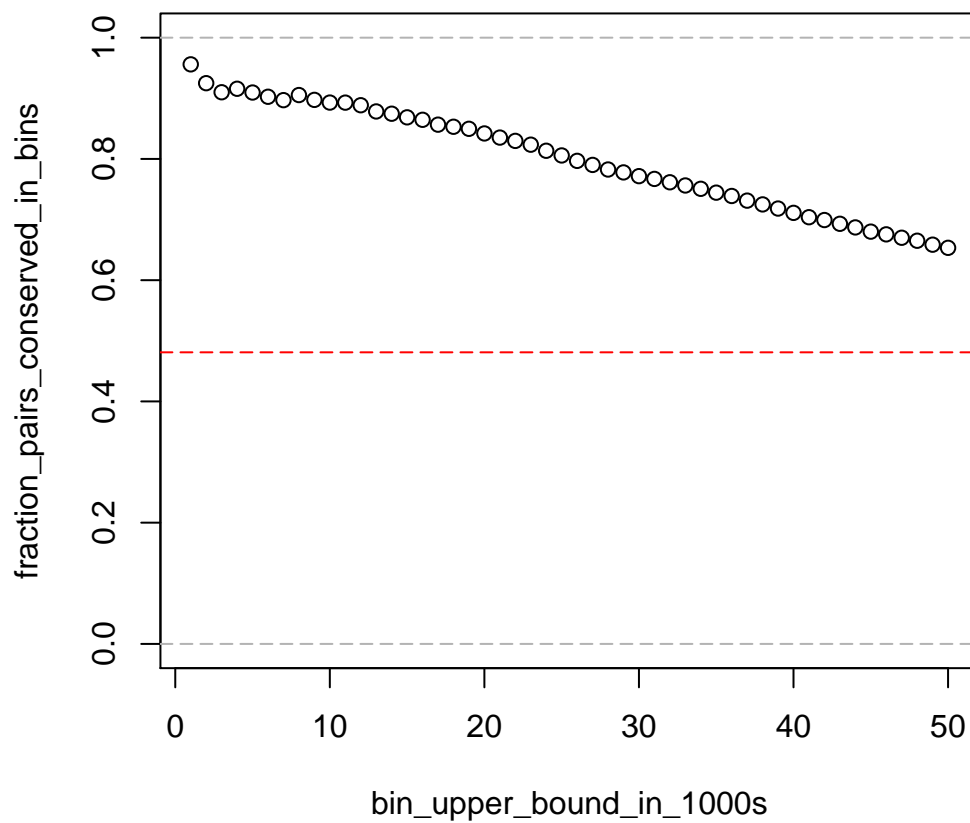

Supplement: s1 [file s1]

**Bin\_conservation\_minus\_bg\_NE-JV-3\_vs\_NW665.2**  
**PD-0.463814**

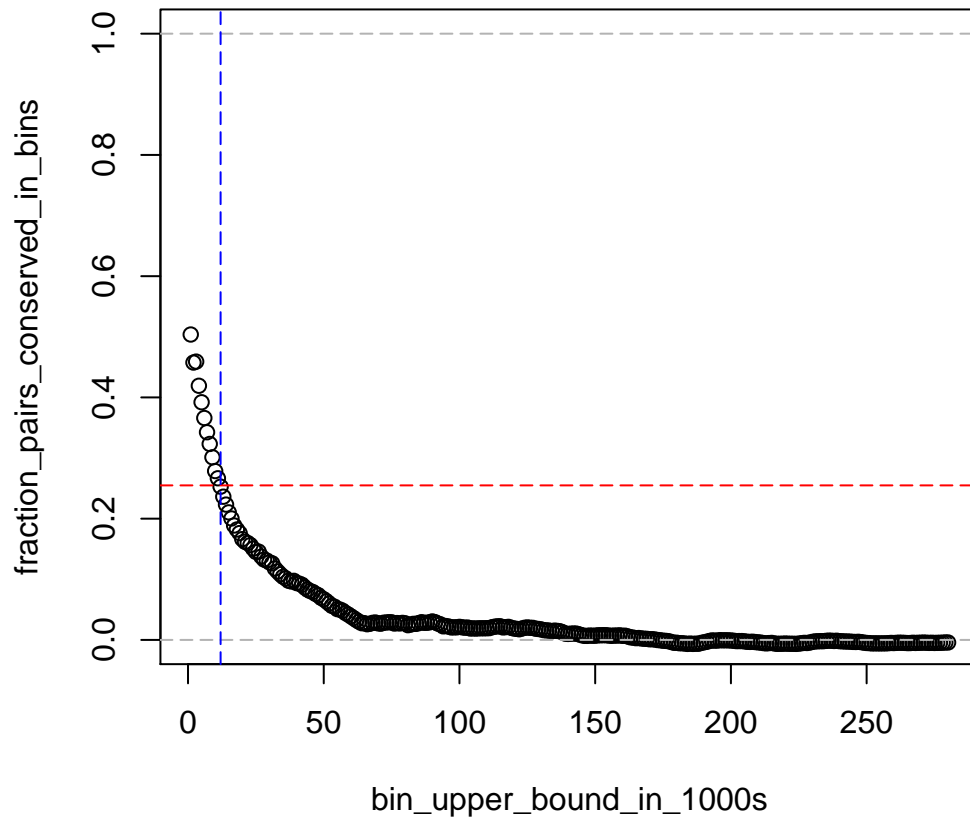

**Bin\_conservation\_minus\_bg\_NE-JV-3\_vs\_NW665.2**  
**PD-0.463814**

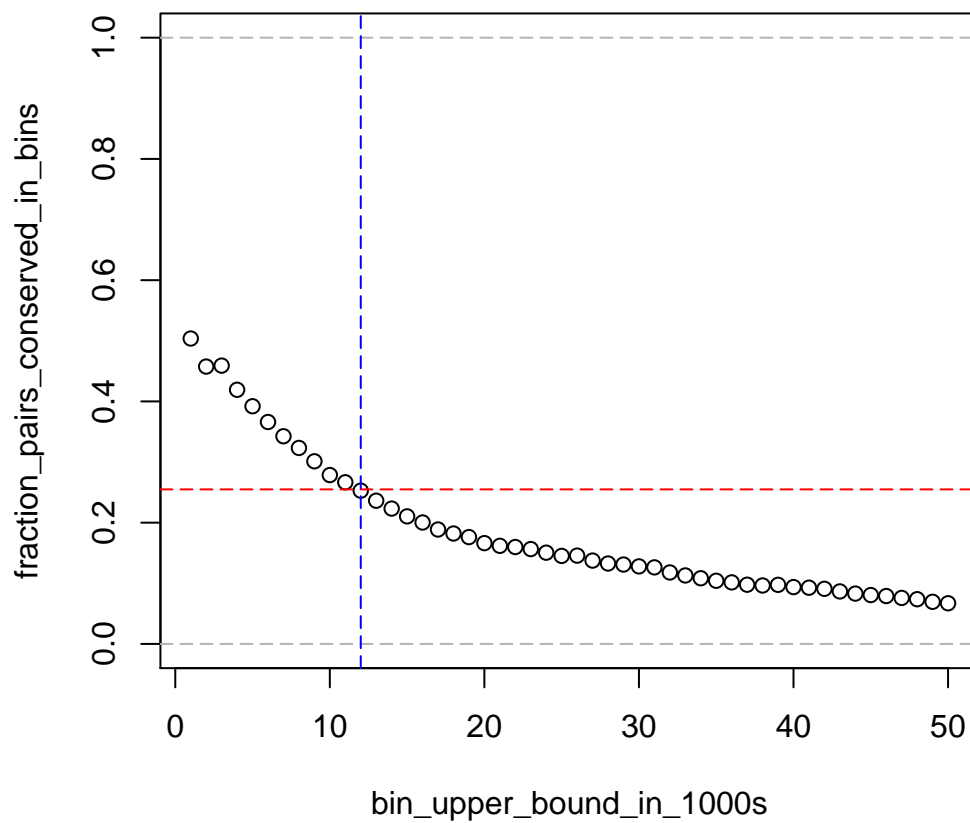

Supplement: s1 [file s1]

**Bin\_conservation\_minus\_bg\_CVR-1\_vs\_IL-5-2s1**  
**PD-0.658883**

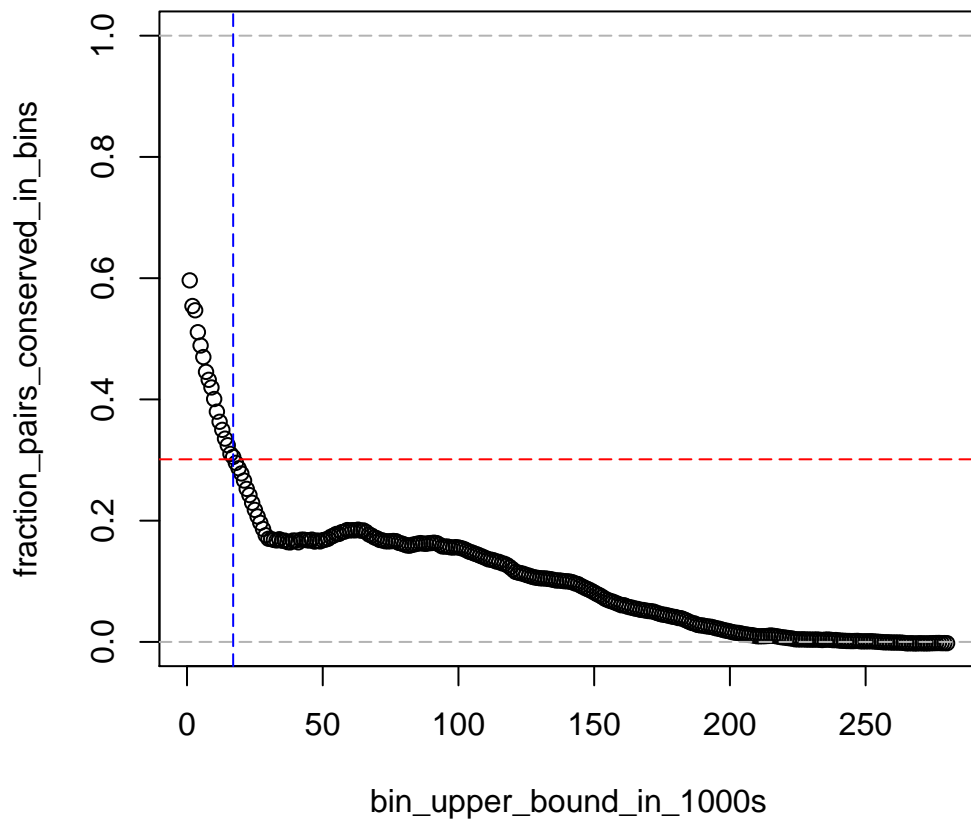

**Bin\_conservation\_minus\_bg\_CVR-1\_vs\_IL-5-2s1**  
**PD-0.658883**

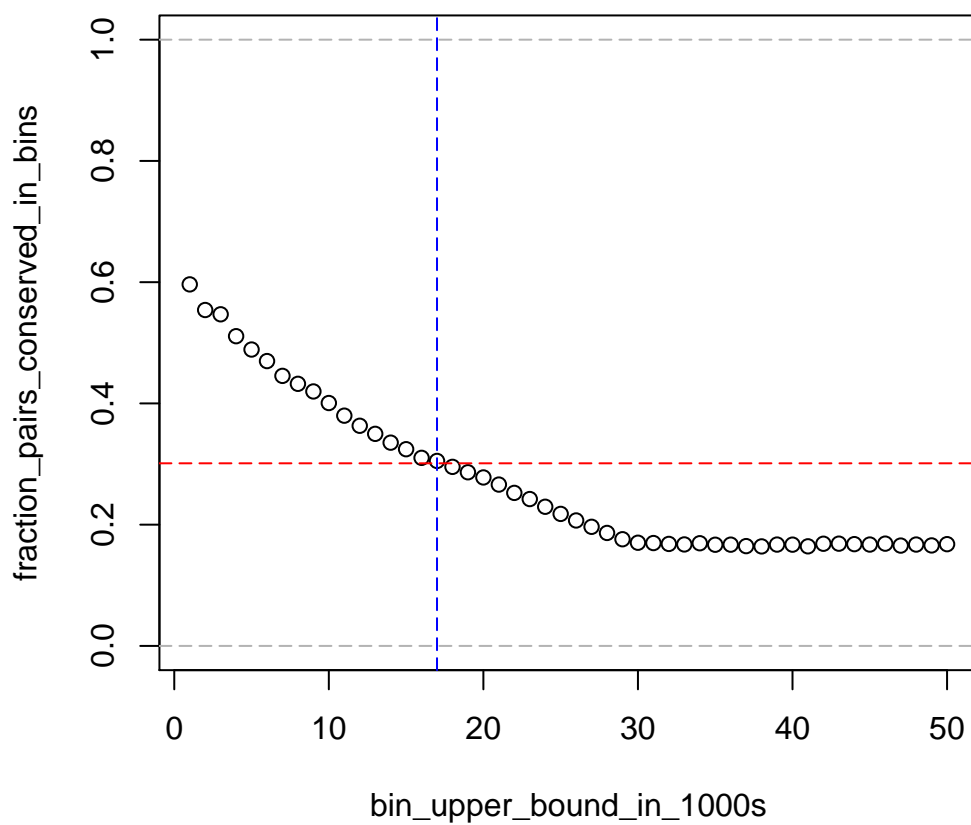

Supplement: s1 [file s1]

**Bin\_conservation\_minus\_bg\_IL-3A\_vs\_NTS-1**  
**PD-0.676151**

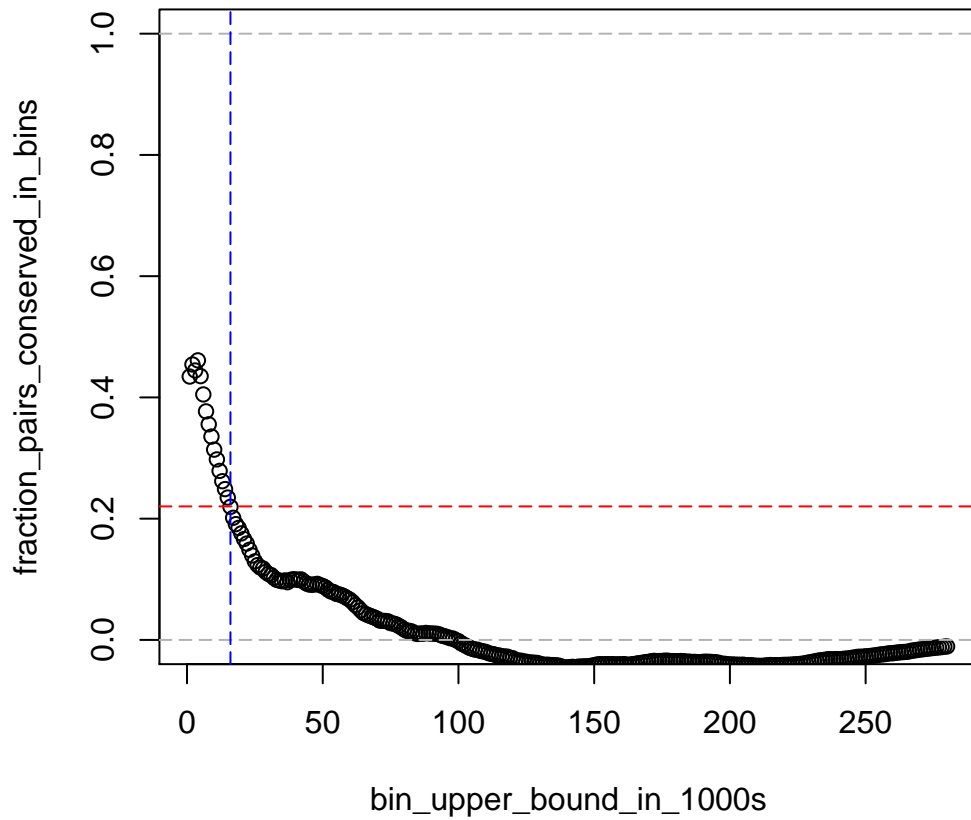

**Bin\_conservation\_minus\_bg\_IL-3A\_vs\_NTS-1**  
**PD-0.676151**

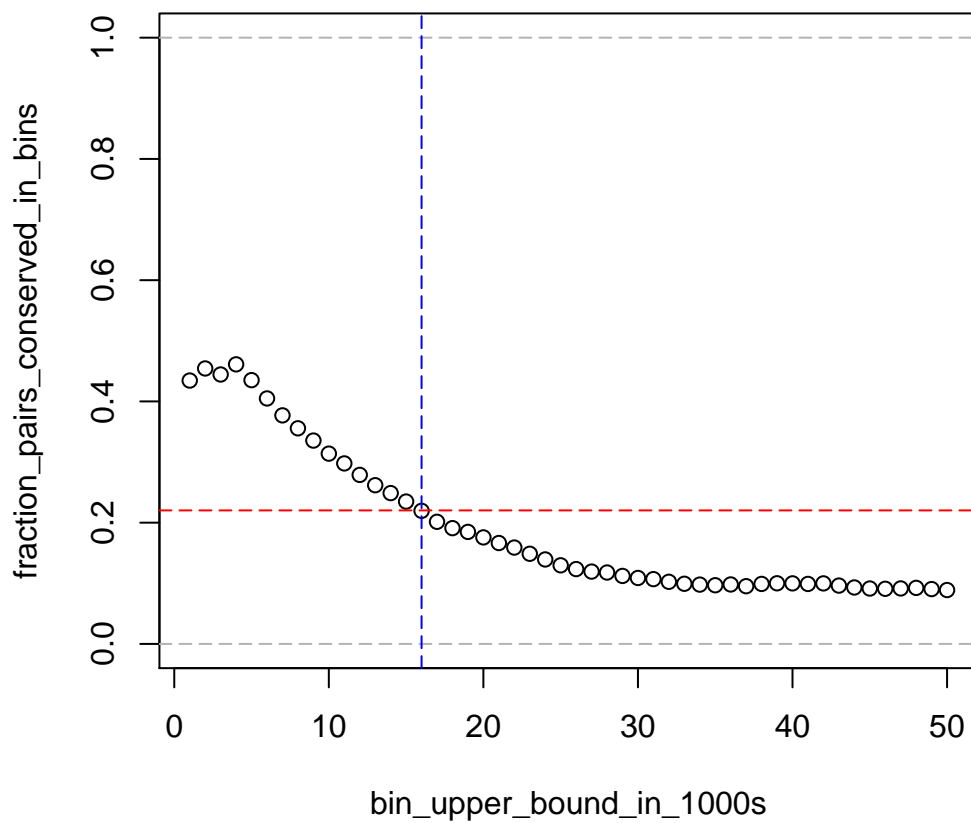

Supplement: s1 [file s1]

**Bin\_conservation\_minus\_bg\_NTS-1\_vs\_WI0606**  
**PD-0.052154**

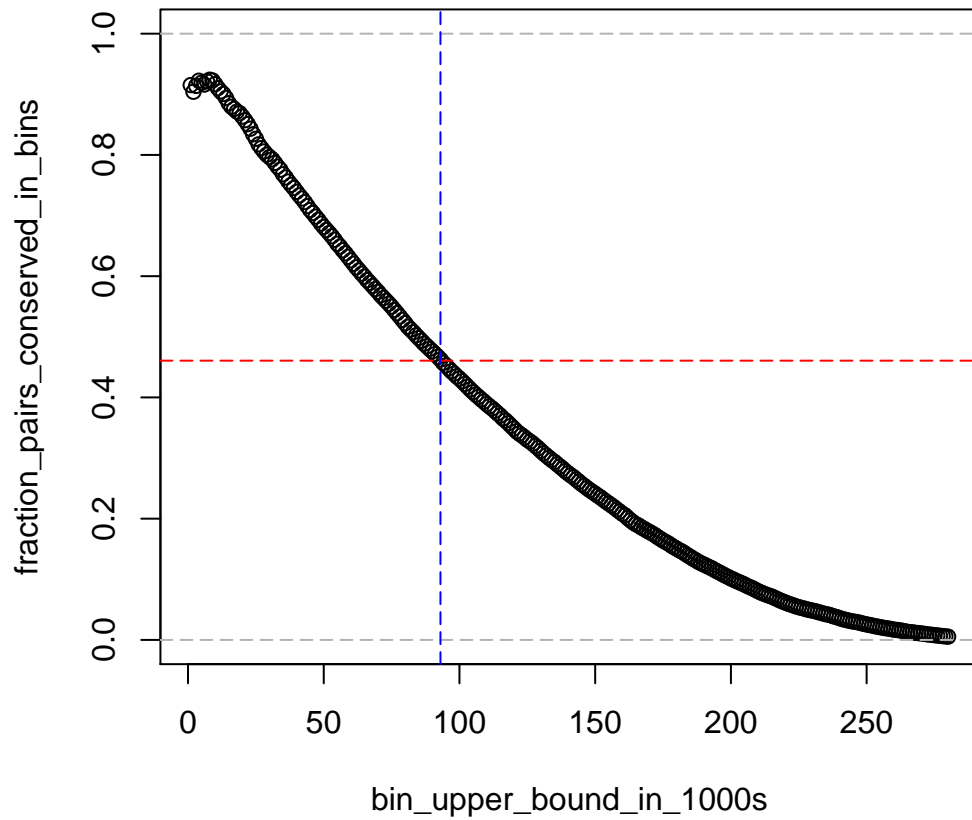

**Bin\_conservation\_minus\_bg\_NTS-1\_vs\_WI0606**  
**PD-0.052154**

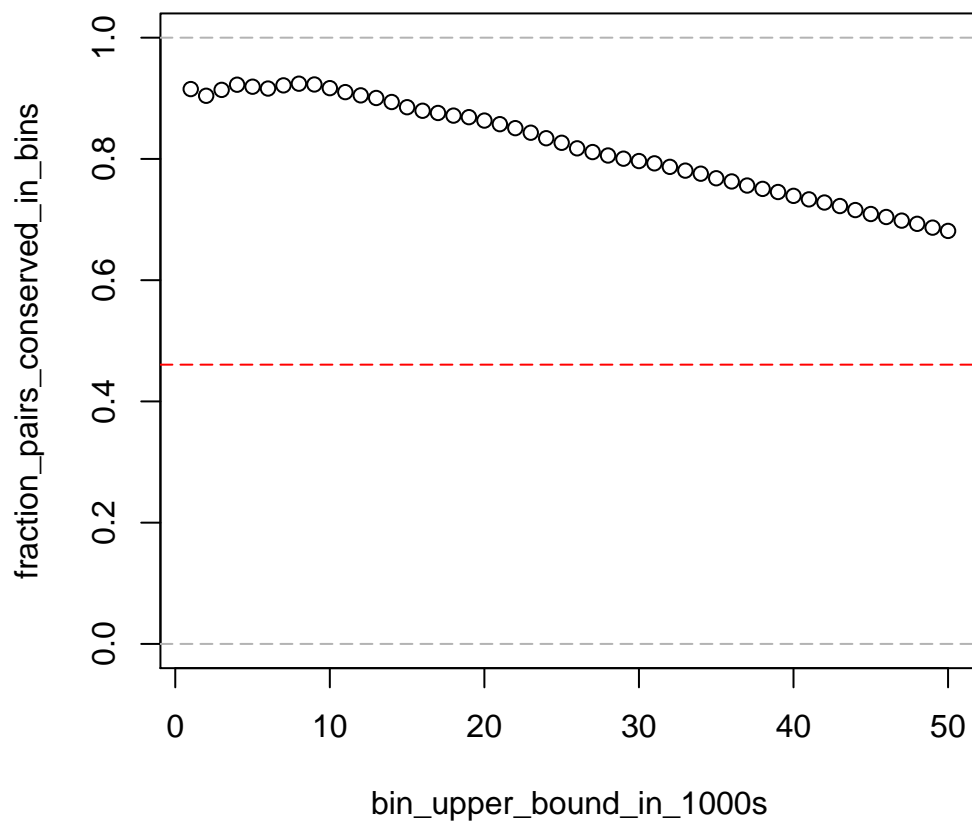

Supplement: s1 [file s1]

**Bin\_conservation\_minus\_bg\_Can18-4\_vs\_TN603.4.2**  
**PD-0.459425**

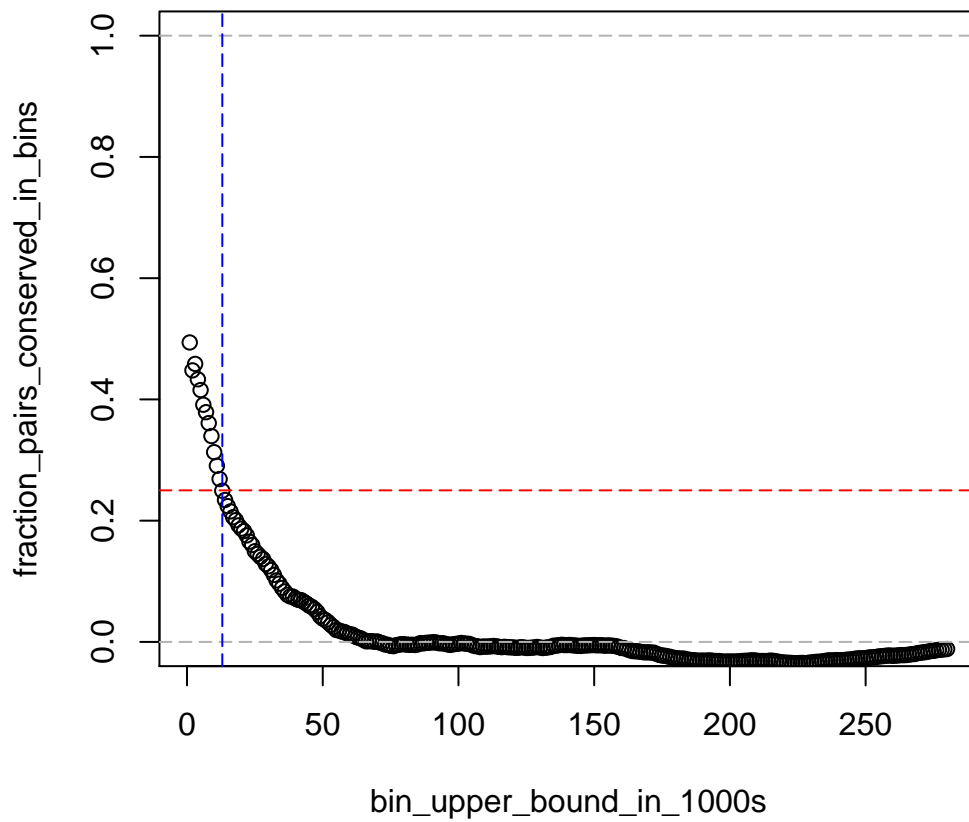

**Bin\_conservation\_minus\_bg\_Can18-4\_vs\_TN603.4.2**  
**PD-0.459425**

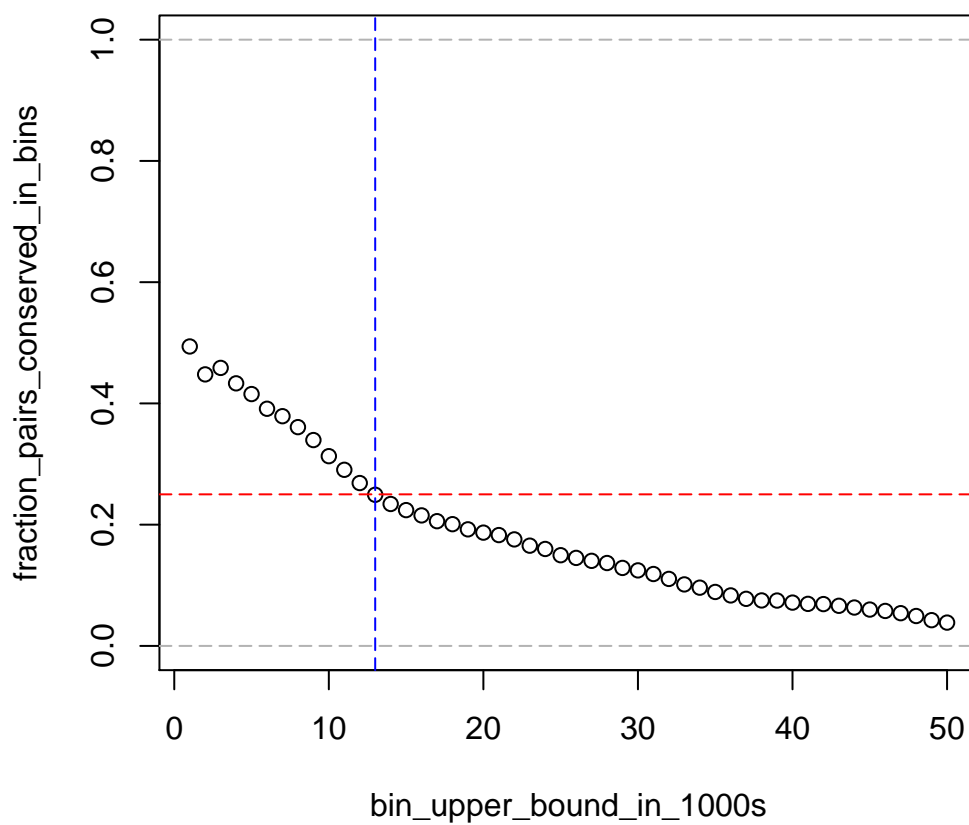

Supplement: s1 [file s1]

**Bin\_conservation\_minus\_bg\_NW665.2\_vs\_WI0606**  
**PD-0.467249**

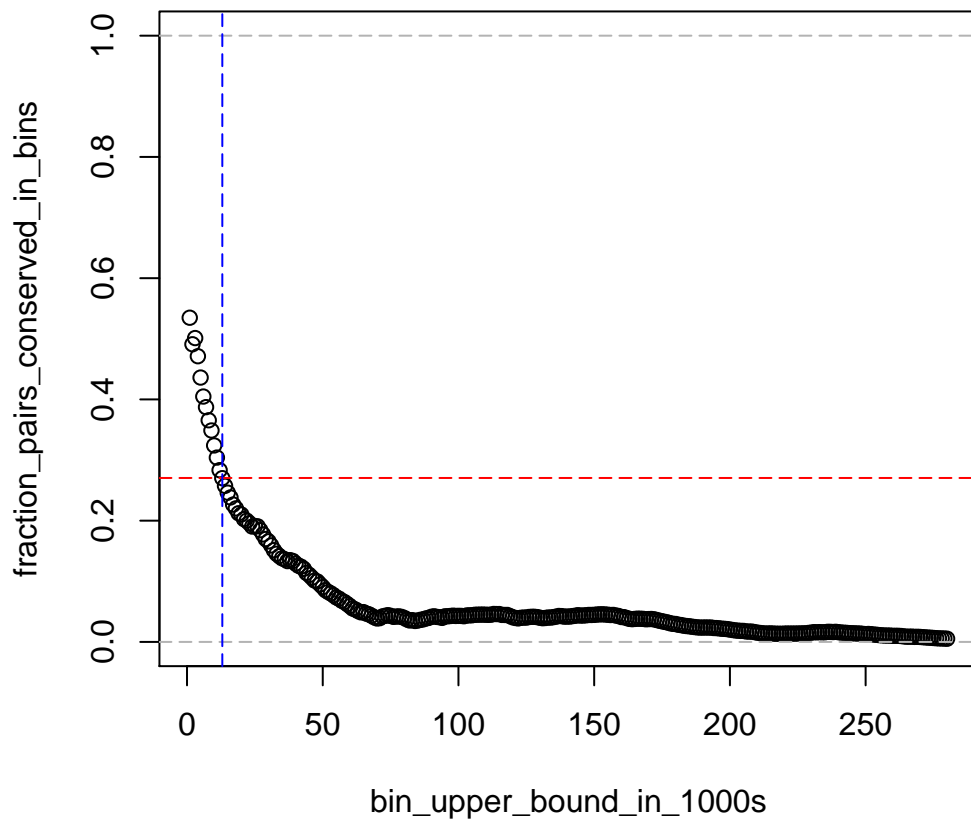

**Bin\_conservation\_minus\_bg\_NW665.2\_vs\_WI0606**  
**PD-0.467249**

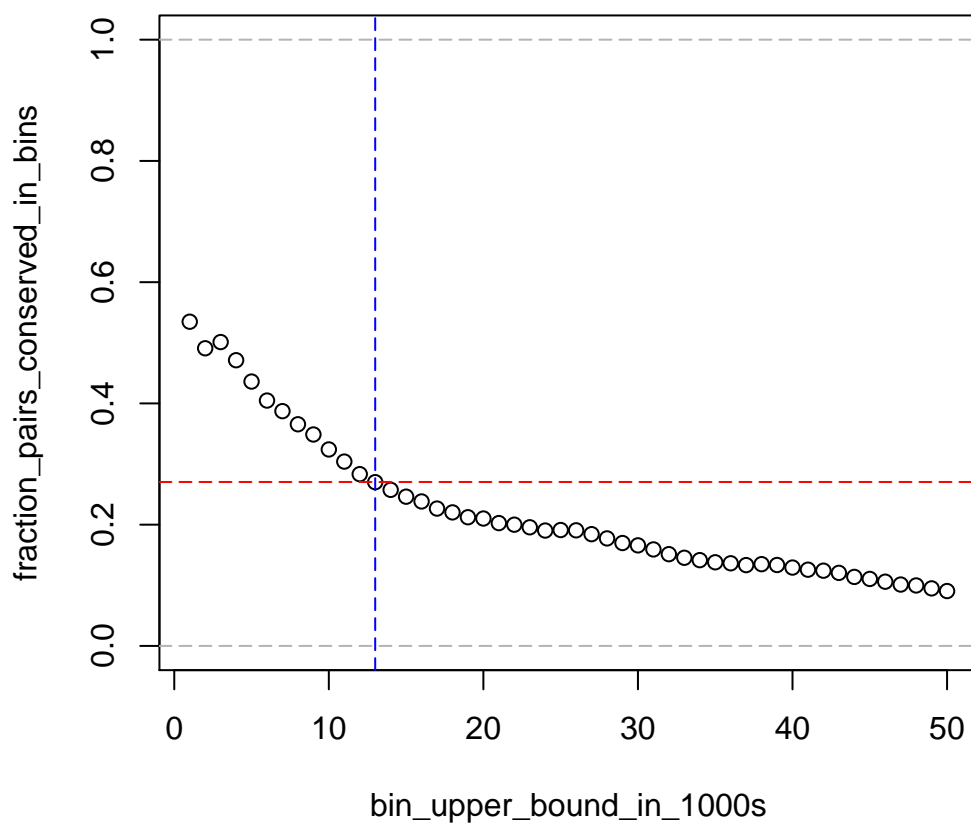

Supplement: s1 [file s1]

**Bin\_conservation\_minus\_bg\_NYs-1\_vs\_PBCV1**  
**PD-0.13009**

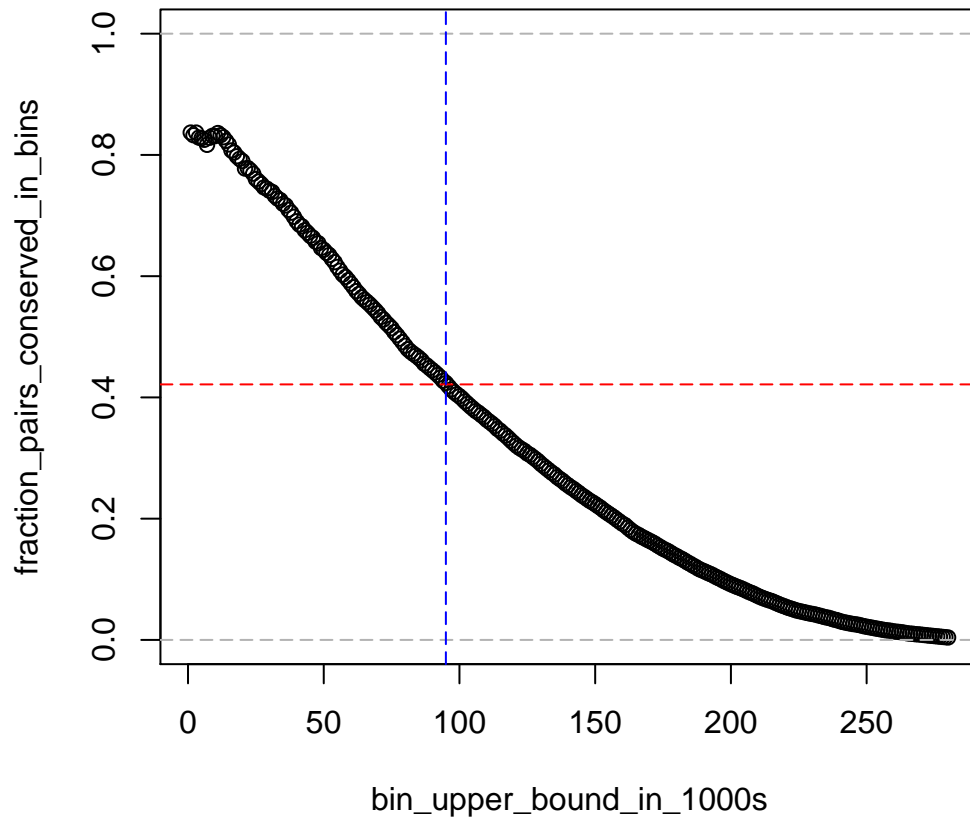

**Bin\_conservation\_minus\_bg\_NYs-1\_vs\_PBCV1**  
**PD-0.13009**

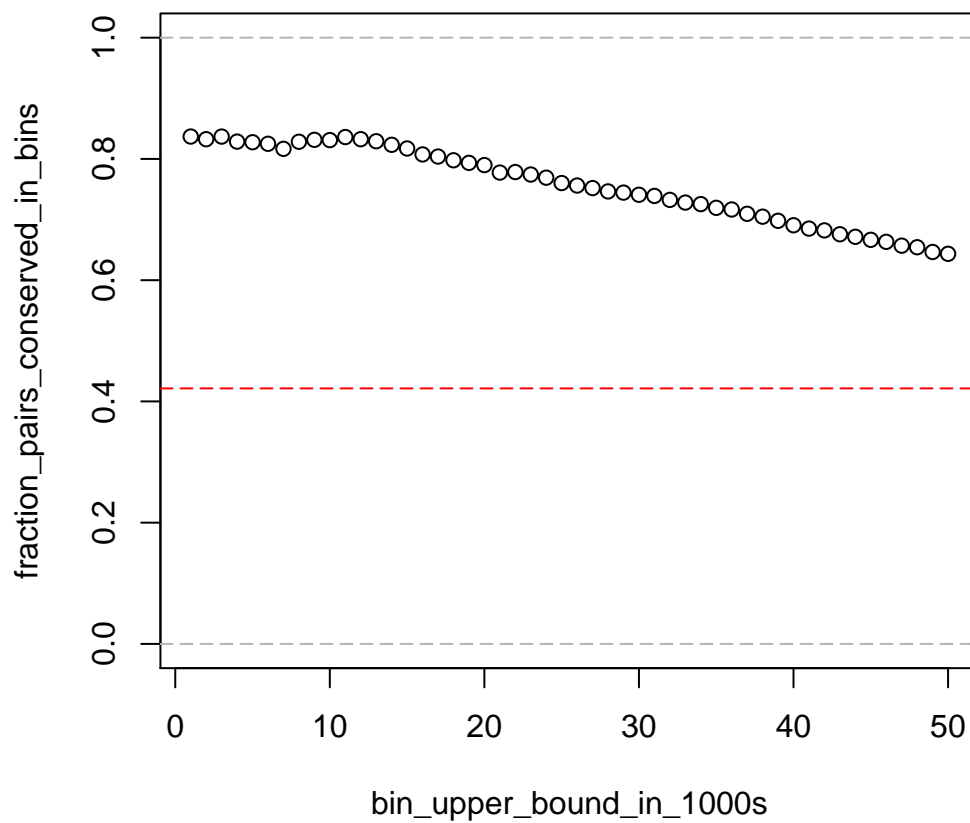

Supplement: s1 [file s1]

**Bin\_conservation\_minus\_bg\_CVR-1\_vs\_NE-JV-4**  
**PD-0.637175**

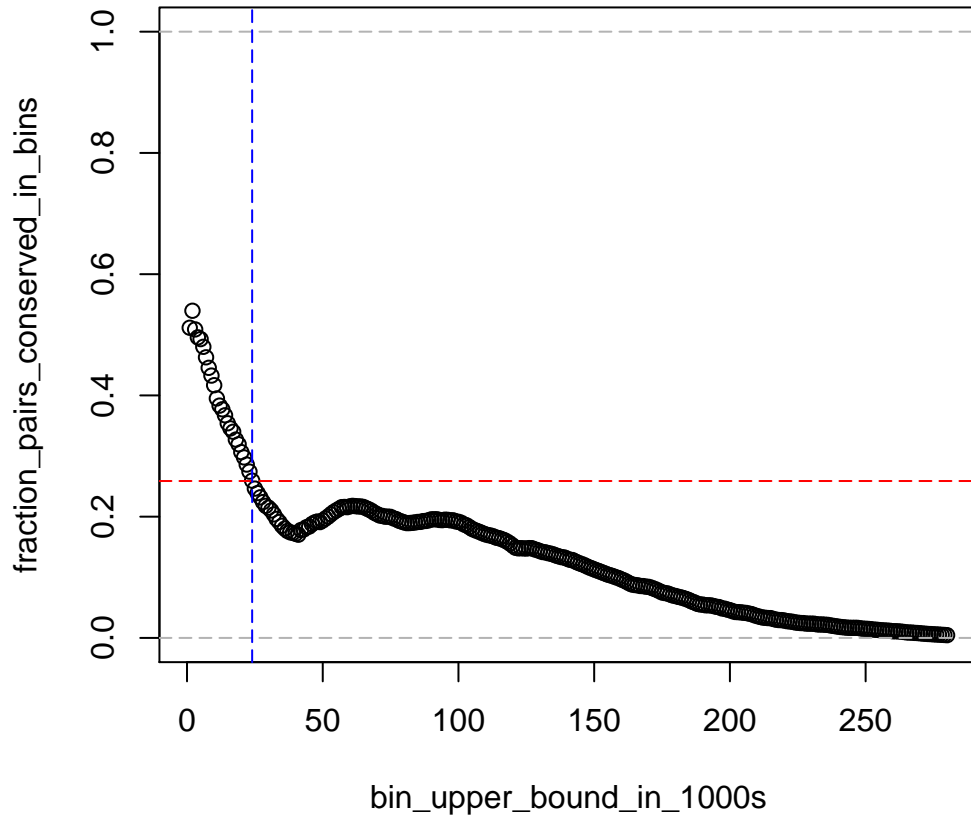

**Bin\_conservation\_minus\_bg\_CVR-1\_vs\_NE-JV-4**  
**PD-0.637175**

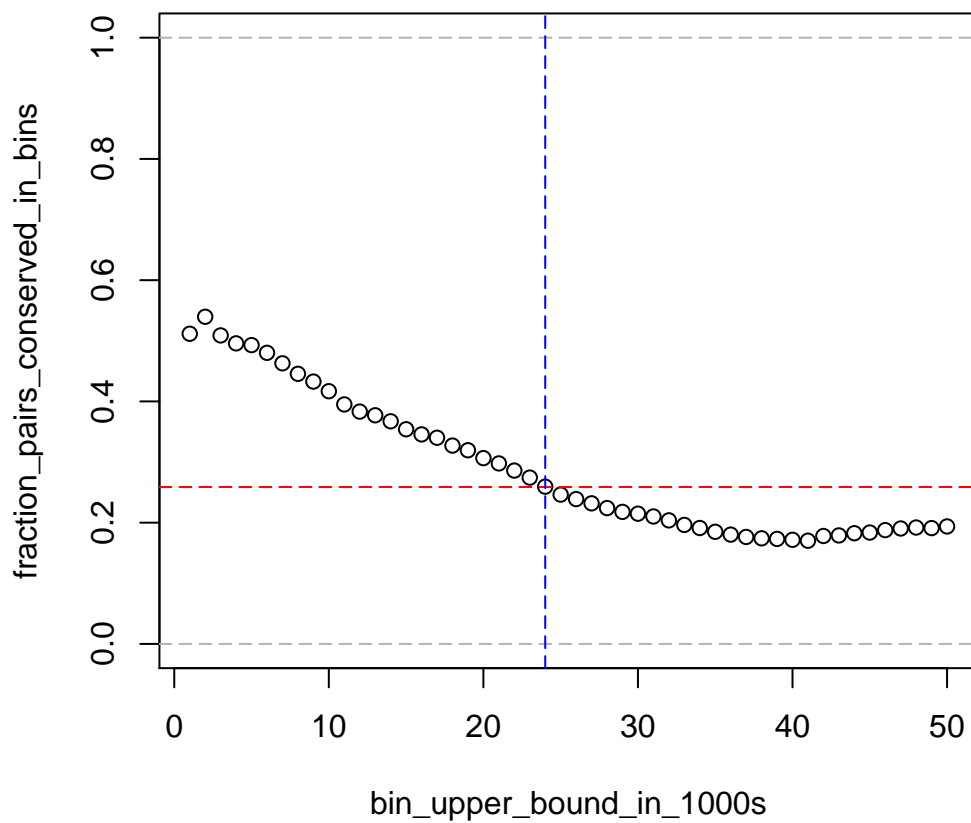

Supplement: s1 [file s1]

**Bin\_conservation\_minus\_bg\_CVB-1\_vs\_NE-JV-3**  
**PD-0.476469**

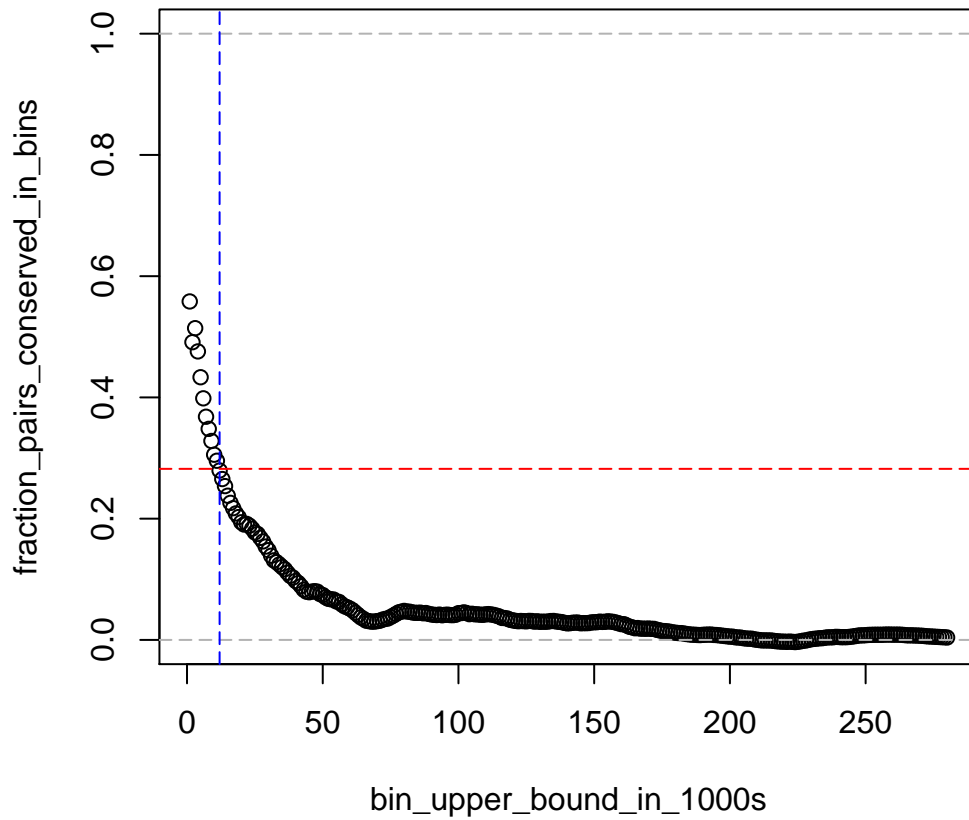

**Bin\_conservation\_minus\_bg\_CVB-1\_vs\_NE-JV-3**  
**PD-0.476469**

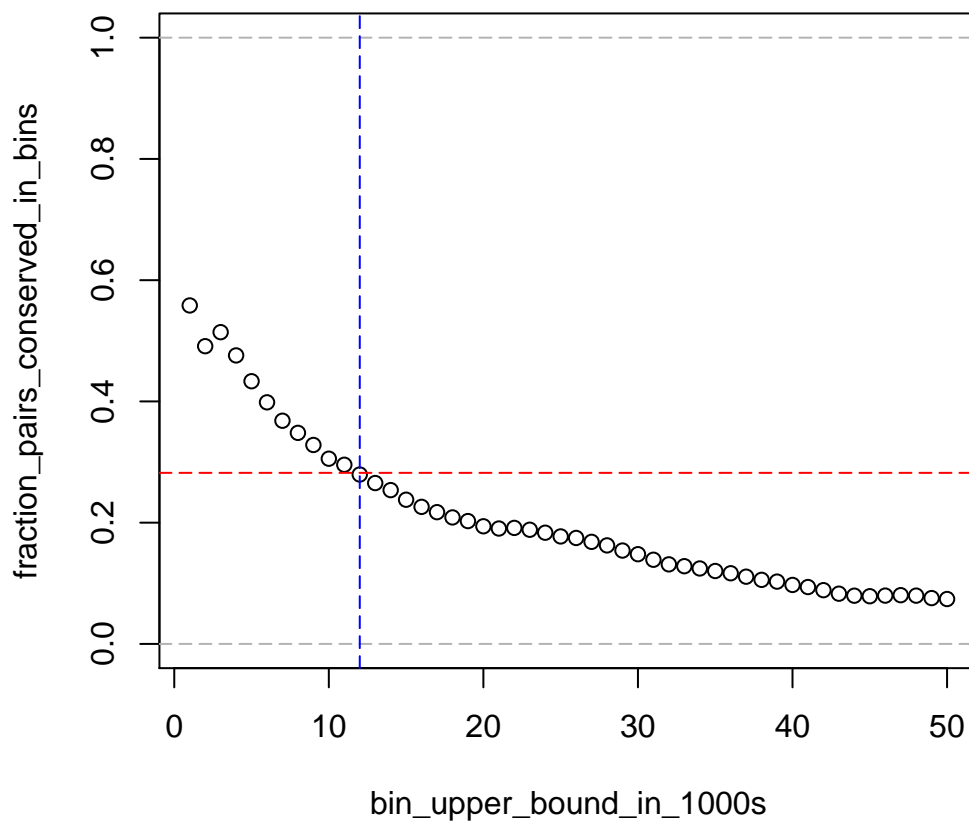

Supplement: s1 [file s1]

**Bin\_conservation\_minus\_bg\_CVB-1\_vs\_CVR-1**  
**PD-0.029132**

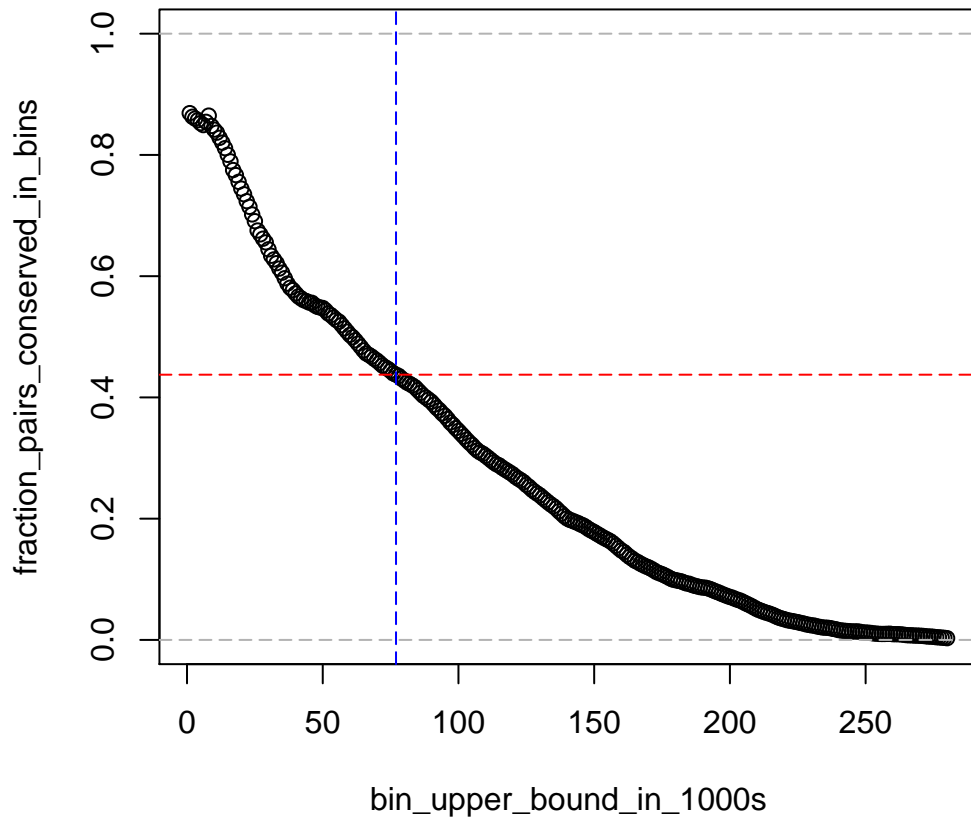

**Bin\_conservation\_minus\_bg\_CVB-1\_vs\_CVR-1**  
**PD-0.029132**

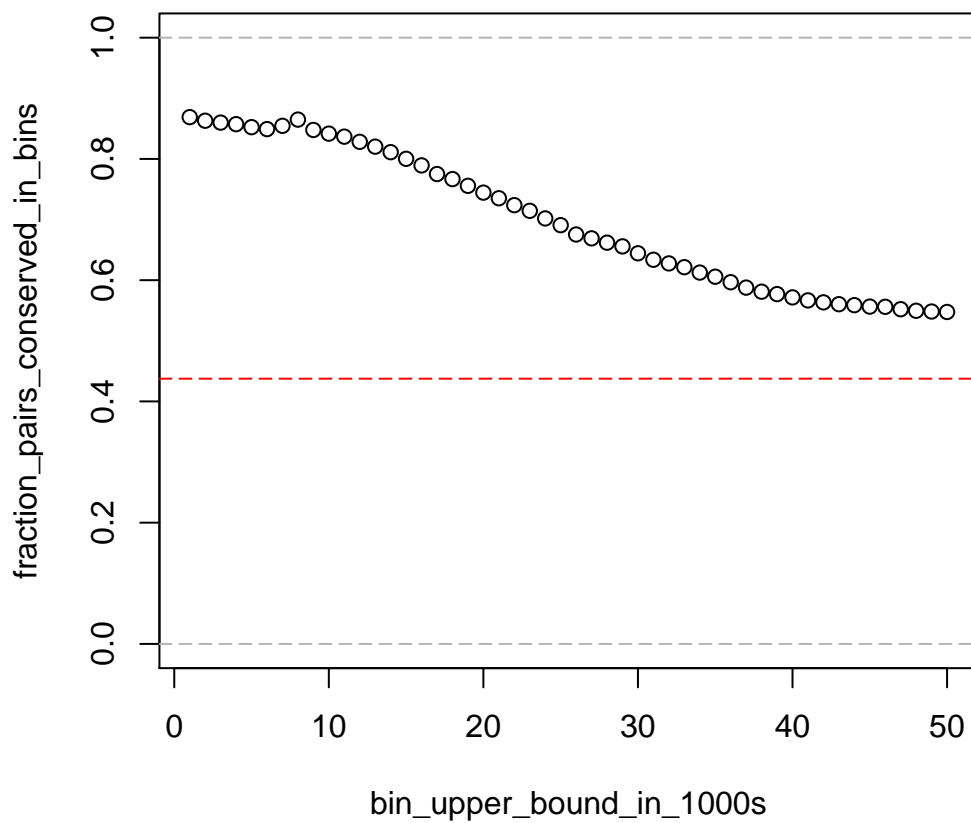

Supplement: s1 [file s1]

**Bin\_conservation\_minus\_bg\_Canal-1\_vs\_WI0606**  
**PD-0.117867**

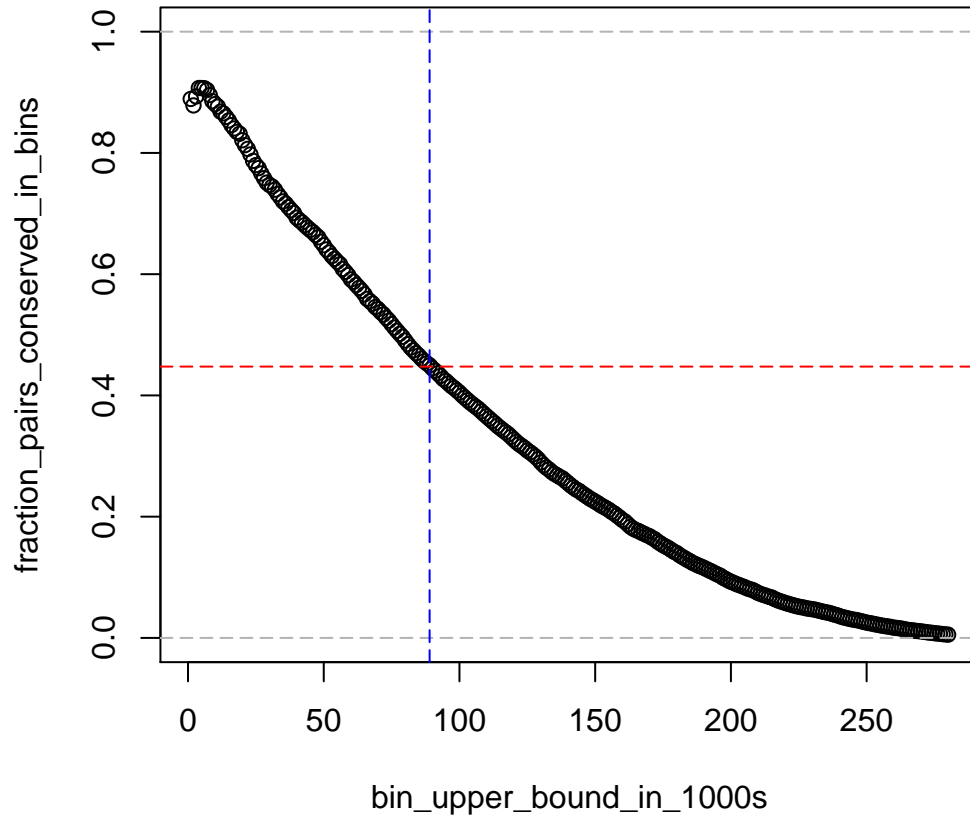

**Bin\_conservation\_minus\_bg\_Canal-1\_vs\_WI0606**  
**PD-0.117867**

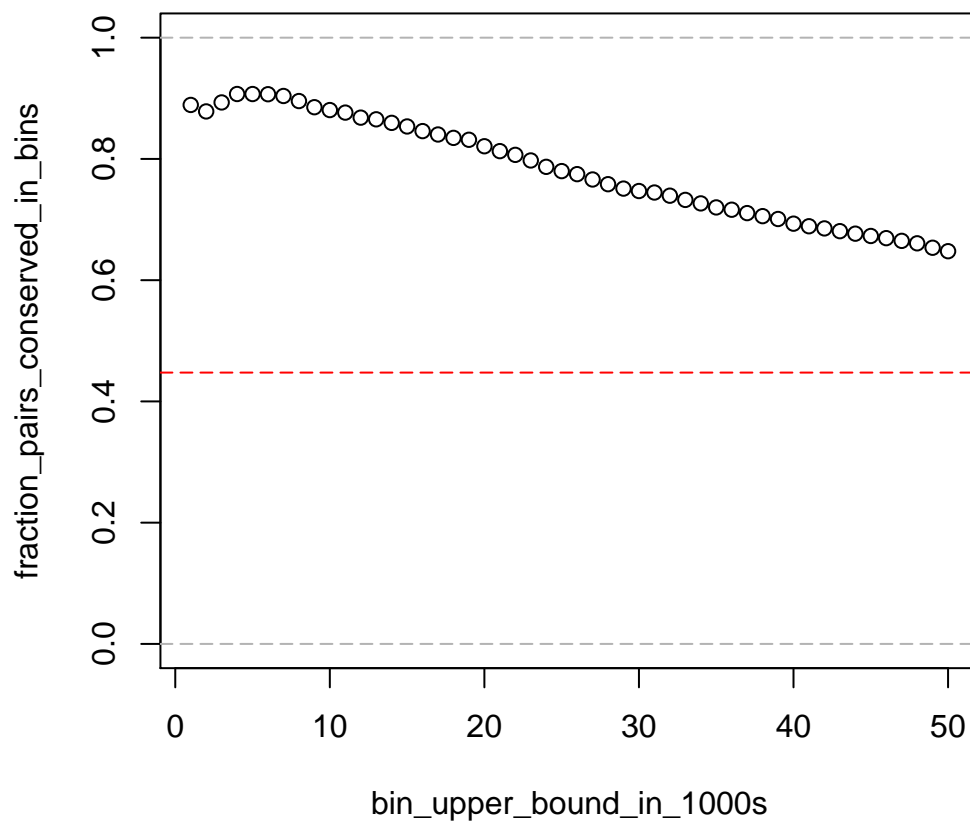

Supplement: s1 [file s1]

**Bin\_conservation\_minus\_bg\_Canal-1\_vs\_NE-JV-3**  
**PD-0.114432**

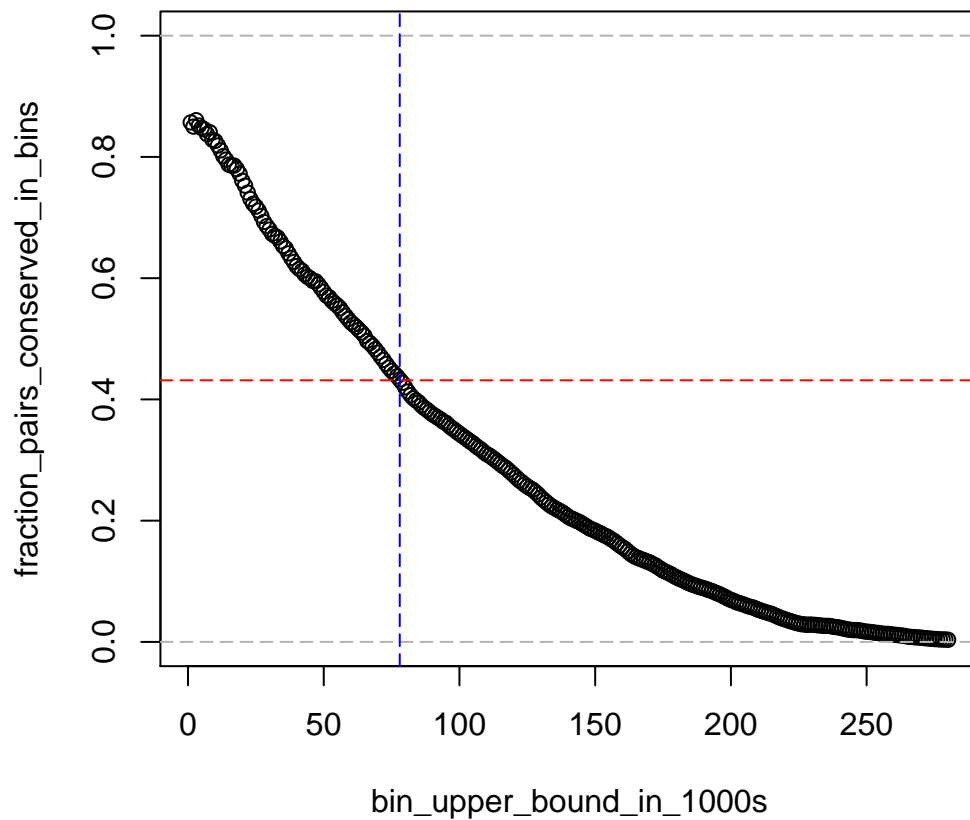

**Bin\_conservation\_minus\_bg\_Canal-1\_vs\_NE-JV-3**  
**PD-0.114432**

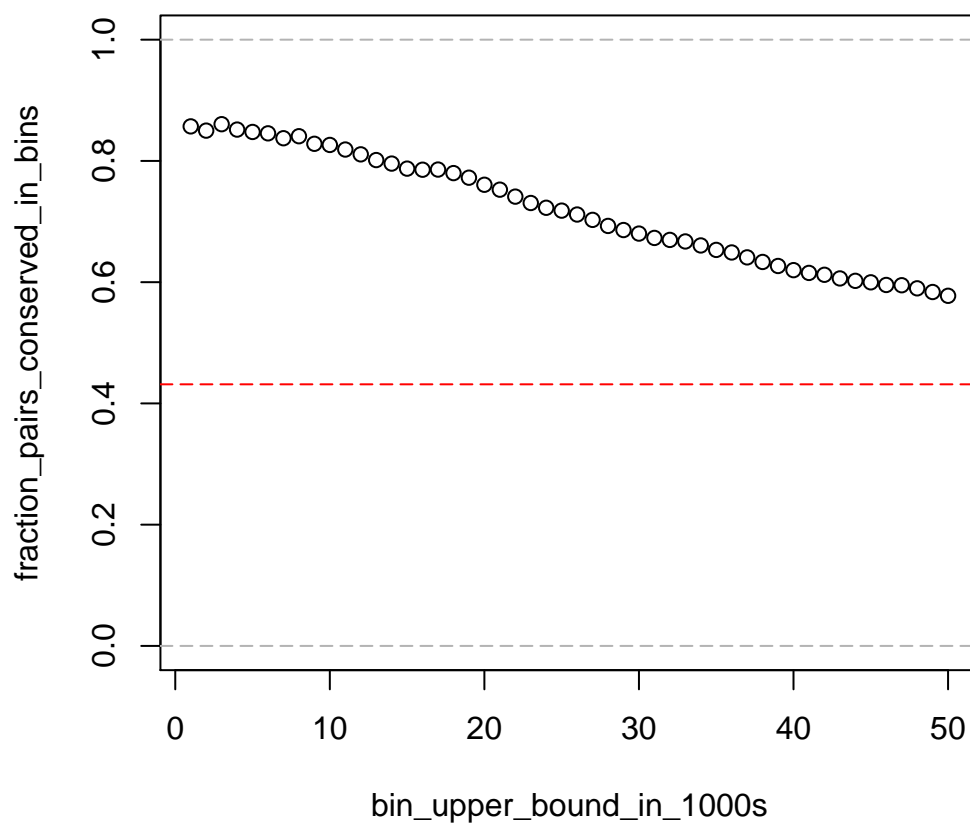

Supplement: s1 [file s1]

**Bin\_conservation\_minus\_bg\_Can18-4\_vs\_NY2A**  
**PD-0.677584**

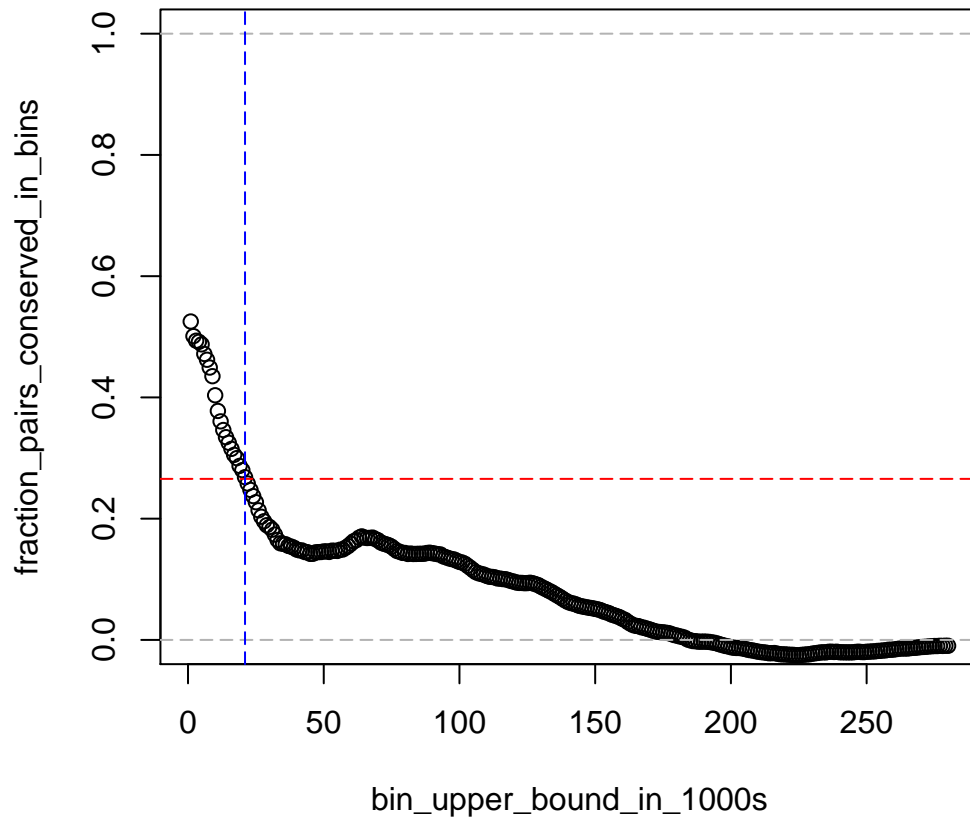

**Bin\_conservation\_minus\_bg\_Can18-4\_vs\_NY2A**  
**PD-0.677584**

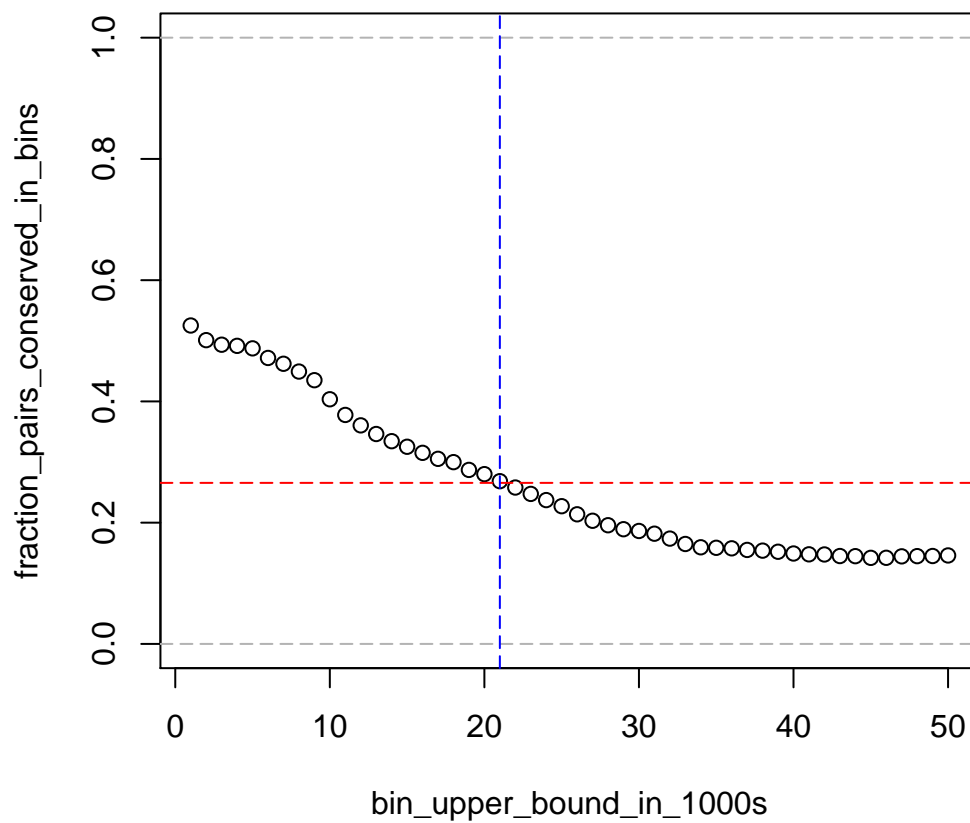

Supplement: s1 [file s1]

**Bin\_conservation\_minus\_bg\_MA-1D\_vs\_NE-JV-2**  
**PD-0.700782**

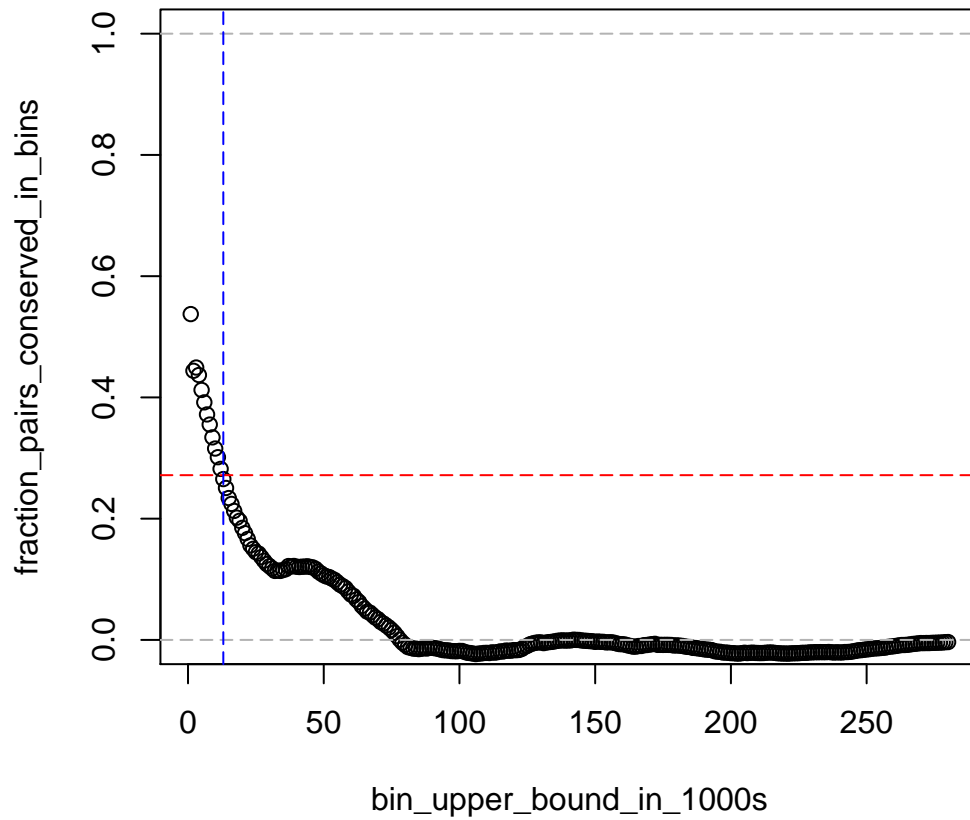

**Bin\_conservation\_minus\_bg\_MA-1D\_vs\_NE-JV-2**  
**PD-0.700782**

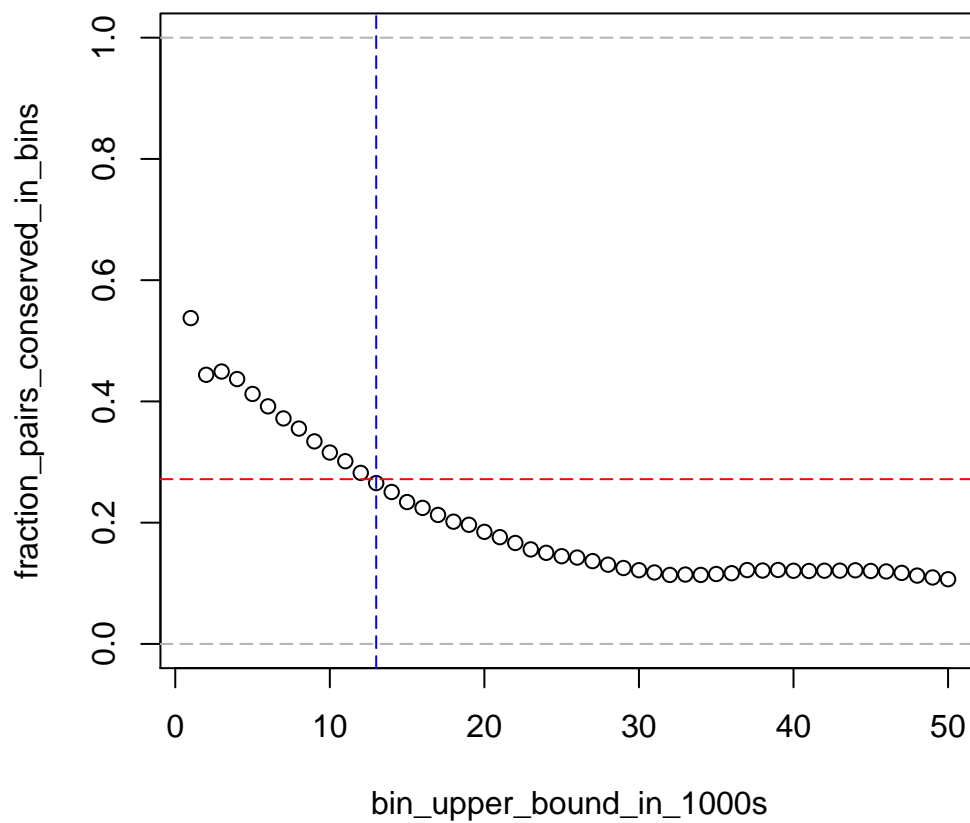

Supplement: s1 [file s1]

**Bin\_conservation\_minus\_bg\_Canal-1\_vs\_MN0810.1**  
**PD-0.073638**

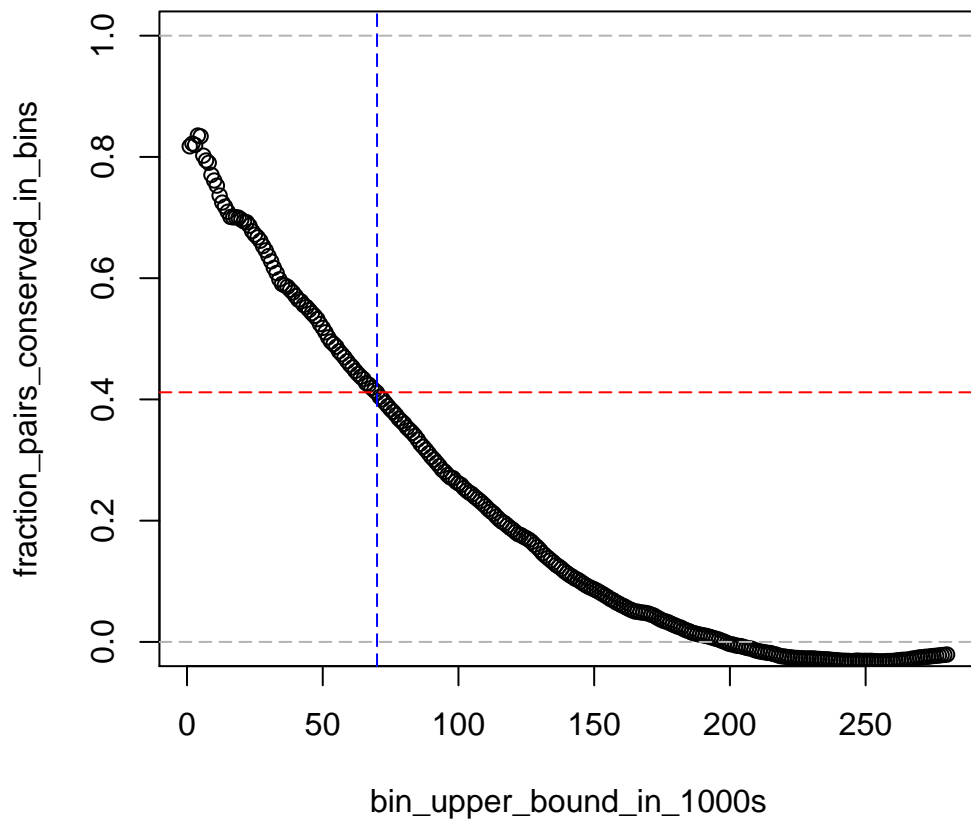

**Bin\_conservation\_minus\_bg\_Canal-1\_vs\_MN0810.1**  
**PD-0.073638**

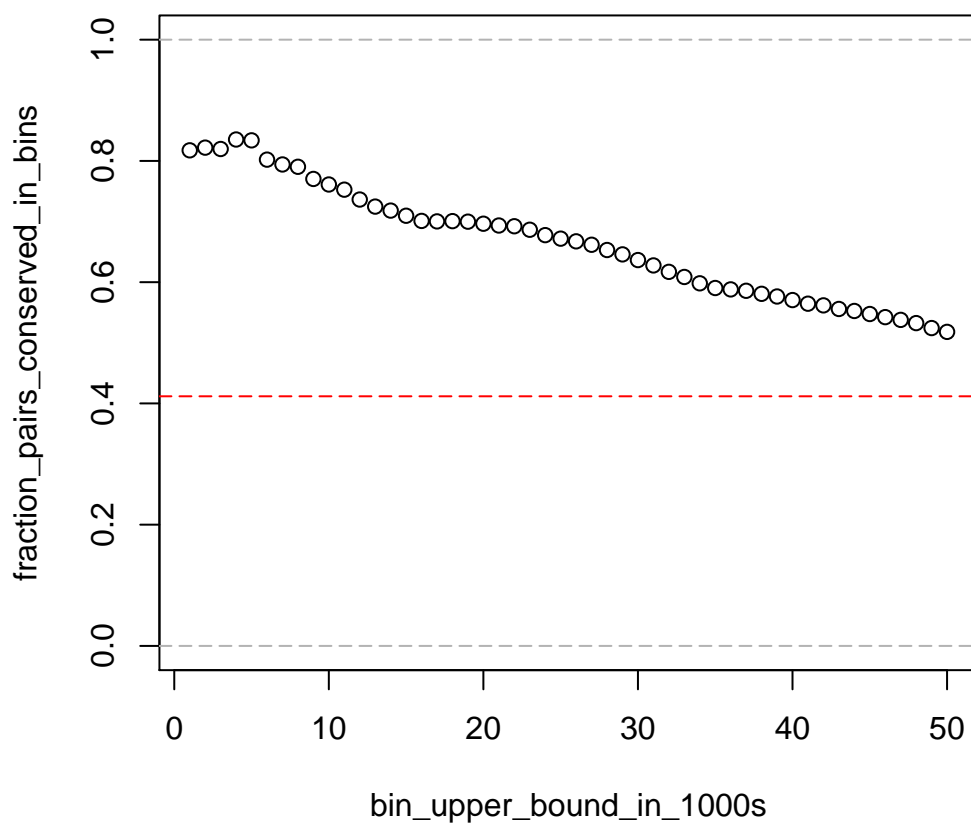

Supplement: s1 [file s1]

**Bin\_conservation\_minus\_bg\_Br0604L\_vs\_MO0605SPH**  
**PD-0.064891**

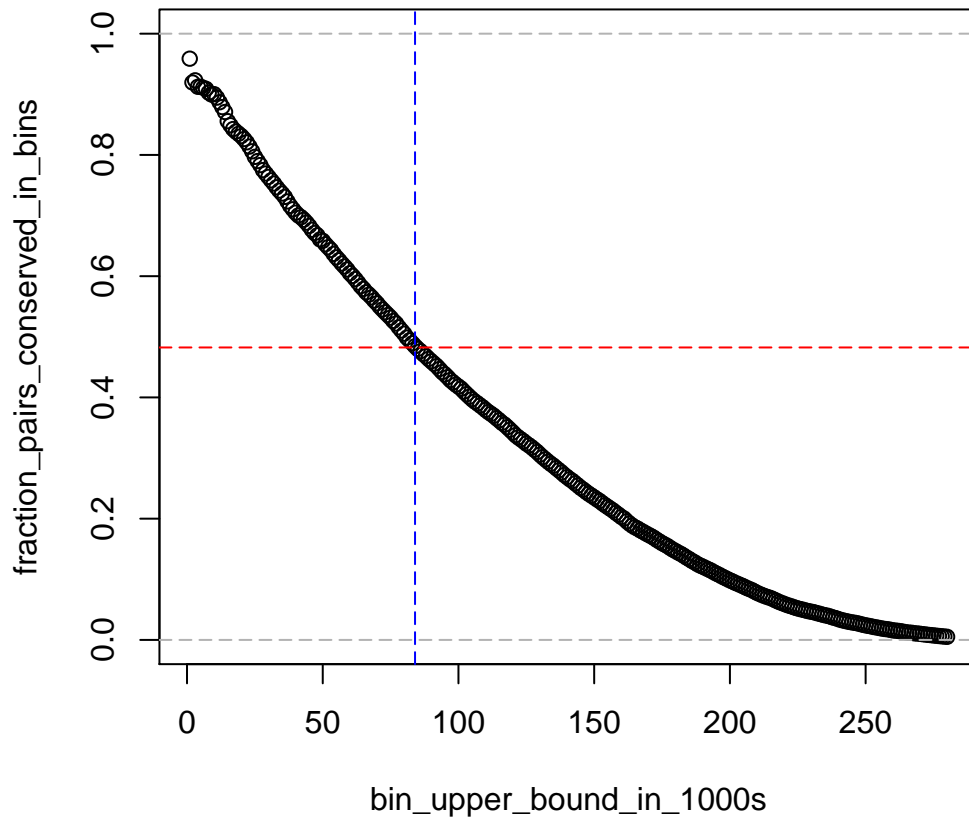

**Bin\_conservation\_minus\_bg\_Br0604L\_vs\_MO0605SPH**  
**PD-0.064891**

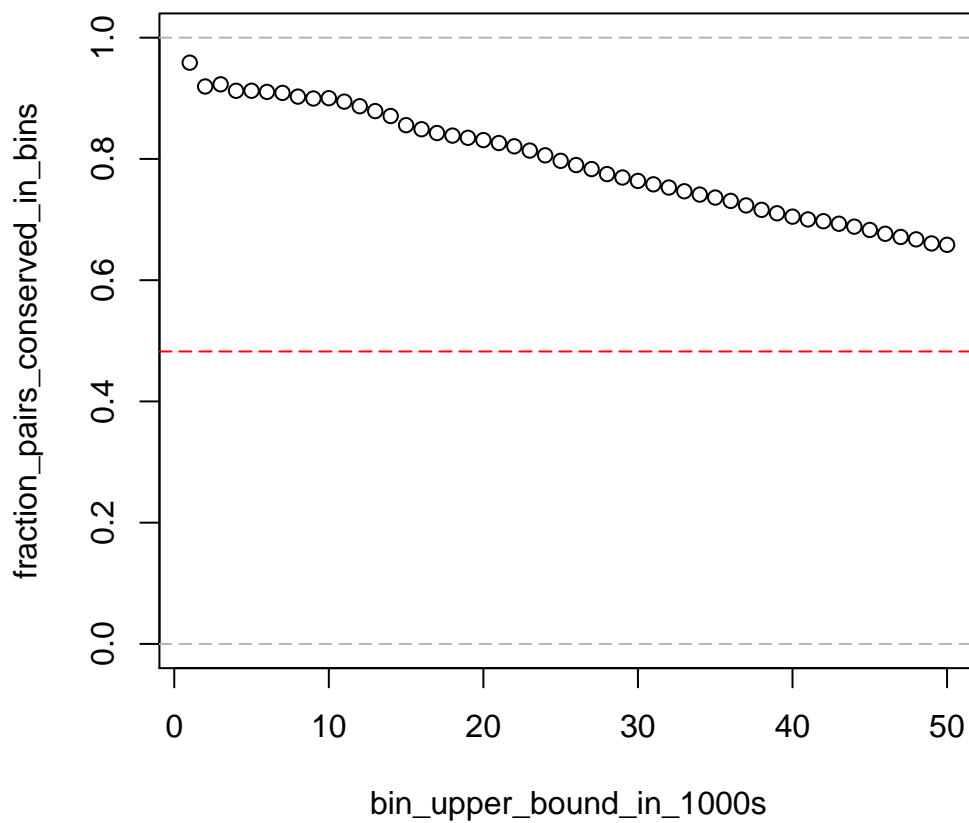

Supplement: s1 [file s1]

**Bin\_conservation\_minus\_bg\_AP110A\_vs\_NE-JV-3**  
**PD-0.463144**

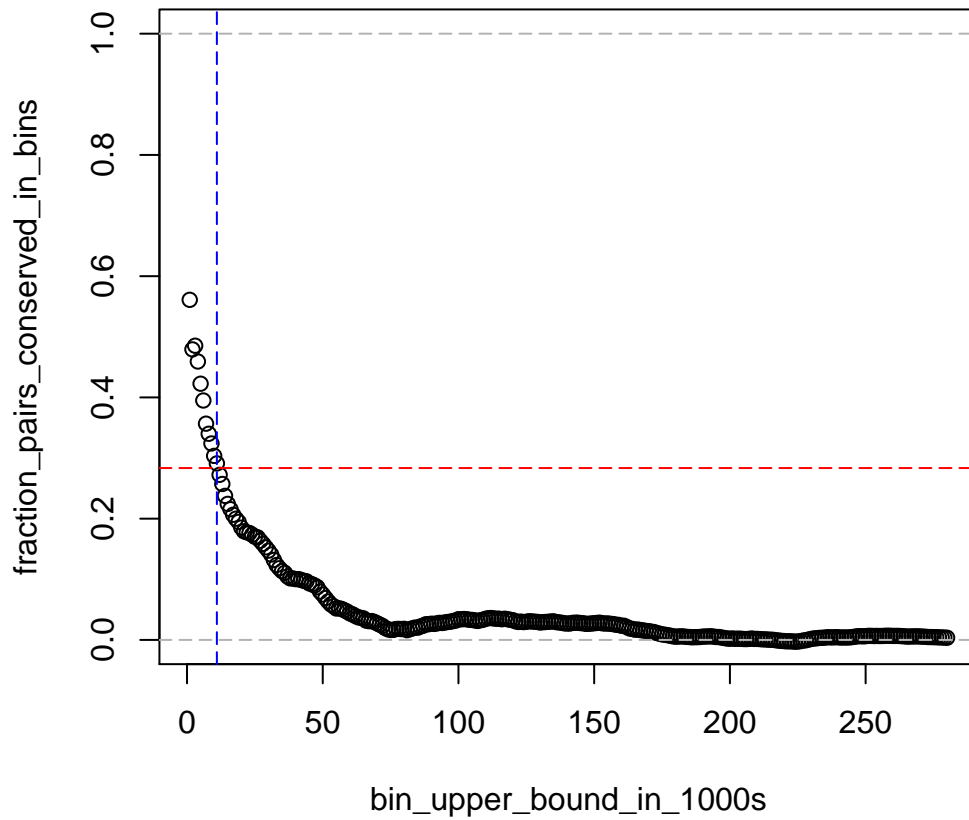

**Bin\_conservation\_minus\_bg\_AP110A\_vs\_NE-JV-3**  
**PD-0.463144**

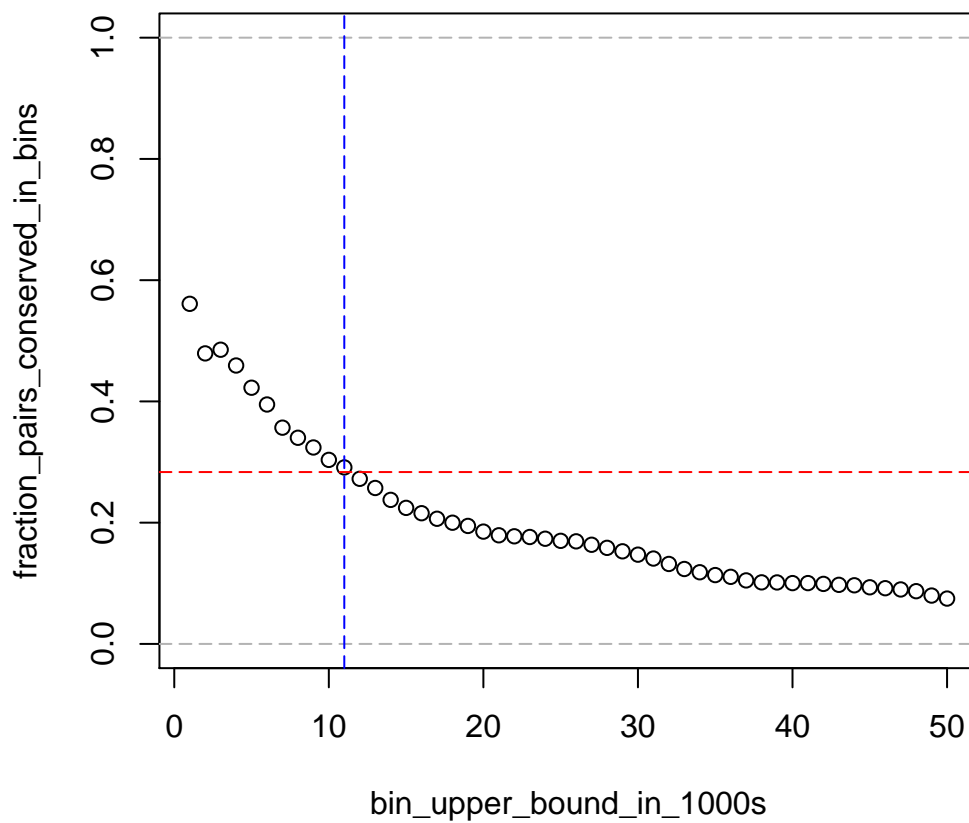

Supplement: s1 [file s1]

**Bin\_conservation\_minus\_bg\_ATCV1\_vs\_FR483**  
**PD-0.464437**

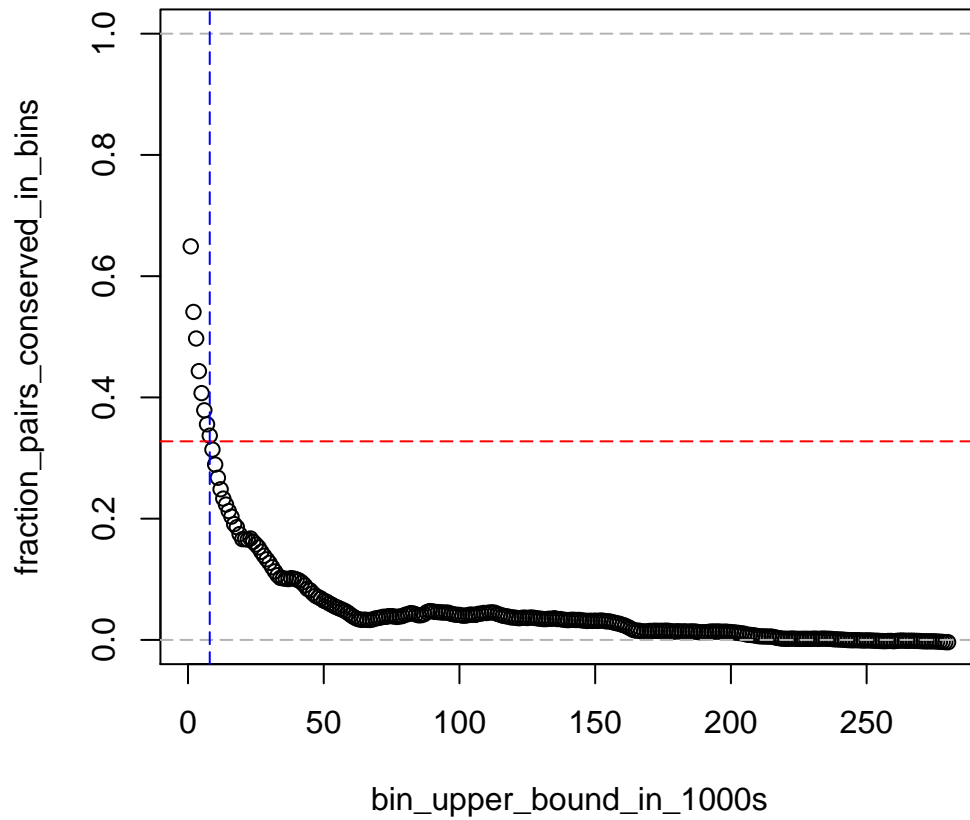

**Bin\_conservation\_minus\_bg\_ATCV1\_vs\_FR483**  
**PD-0.464437**

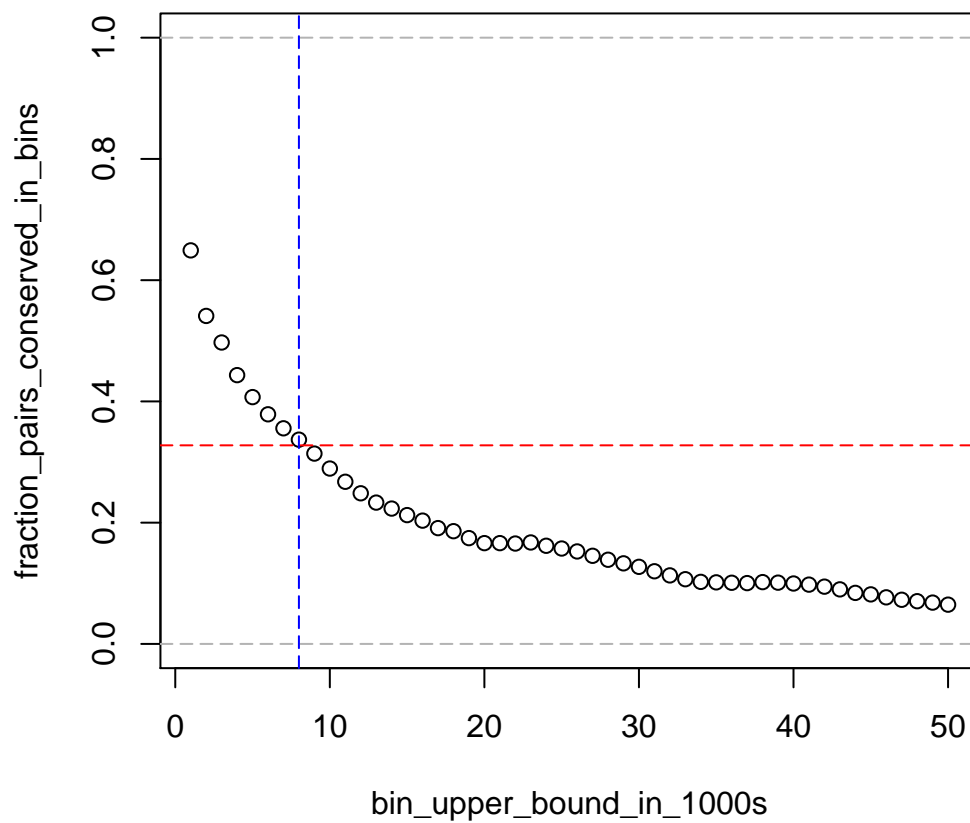

Supplement: s1 [file s1]

**Bin\_conservation\_minus\_bg\_OR0704.3\_vs\_WI0606**  
**PD-0.023863**

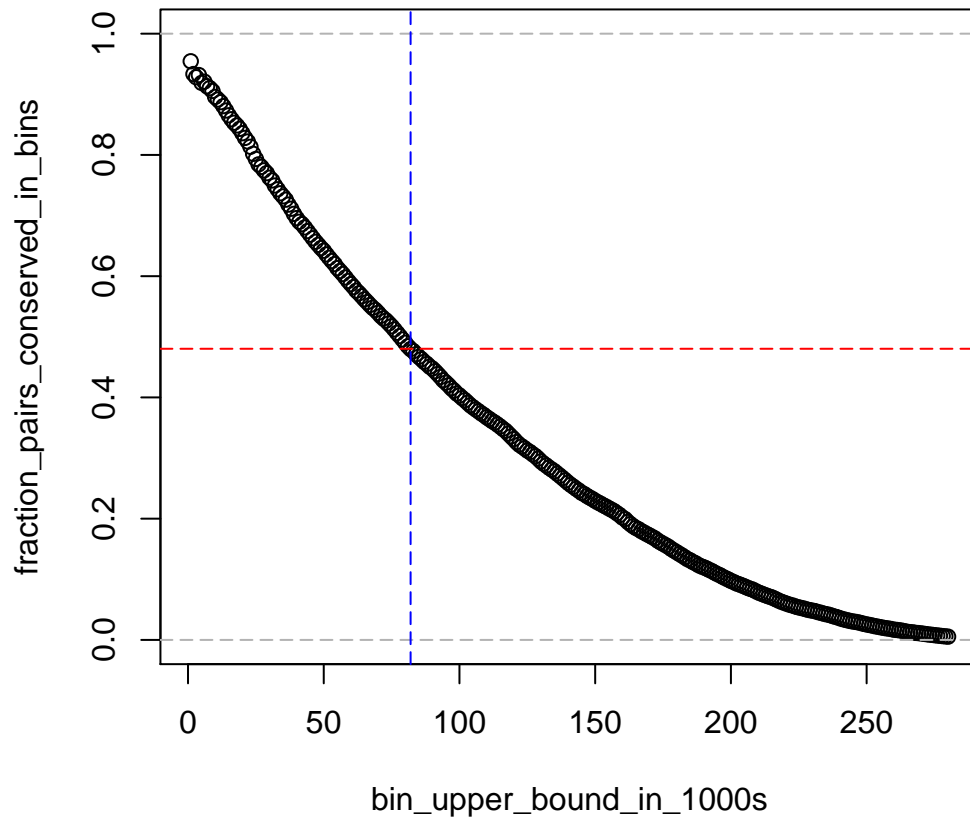

**Bin\_conservation\_minus\_bg\_OR0704.3\_vs\_WI0606**  
**PD-0.023863**

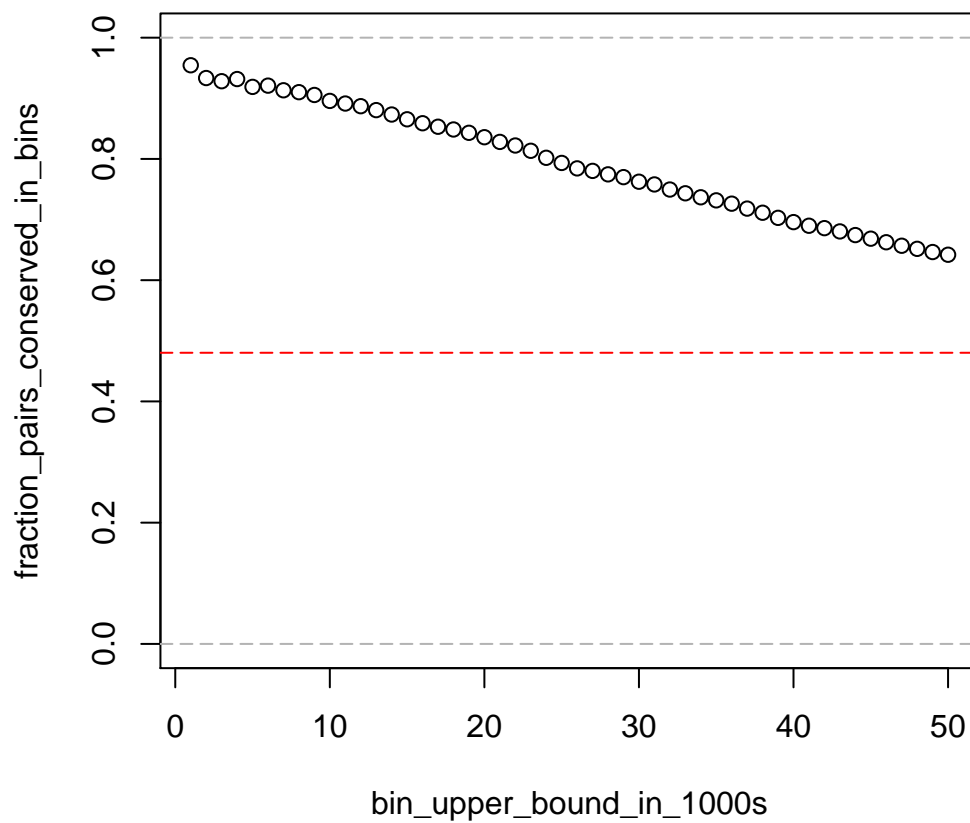

Supplement: s1 [file s1]

**Bin\_conservation\_minus\_bg\_Fr5L\_vs\_MA-1E**  
**PD-0.651802**

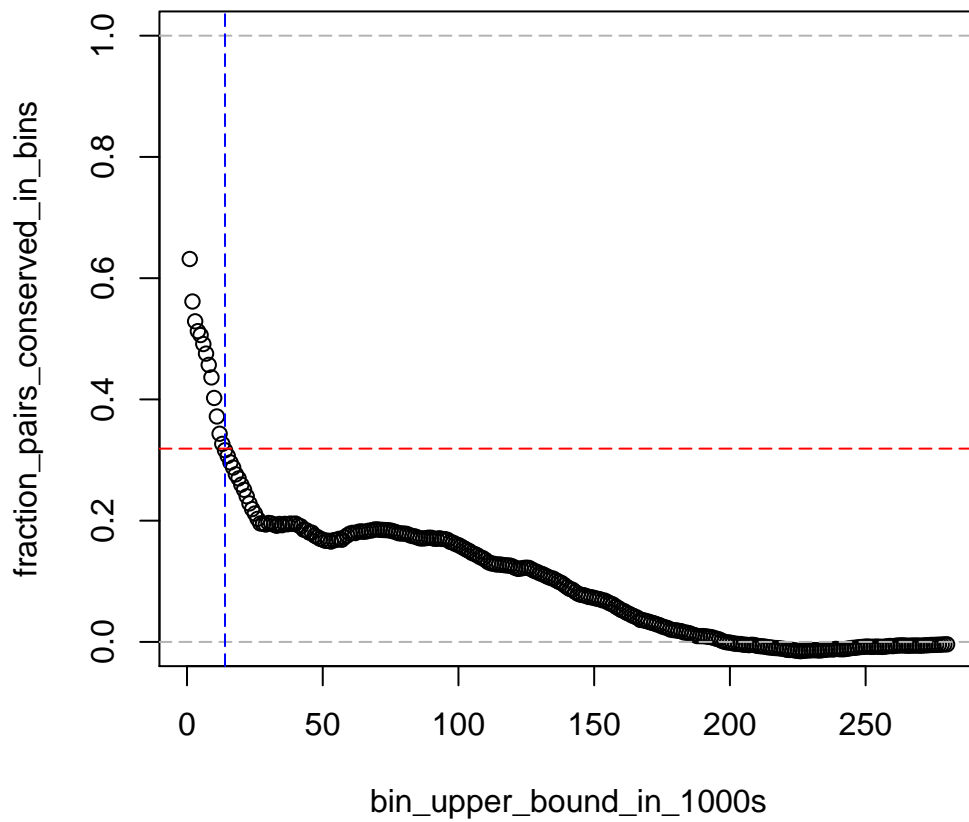

**Bin\_conservation\_minus\_bg\_Fr5L\_vs\_MA-1E**  
**PD-0.651802**

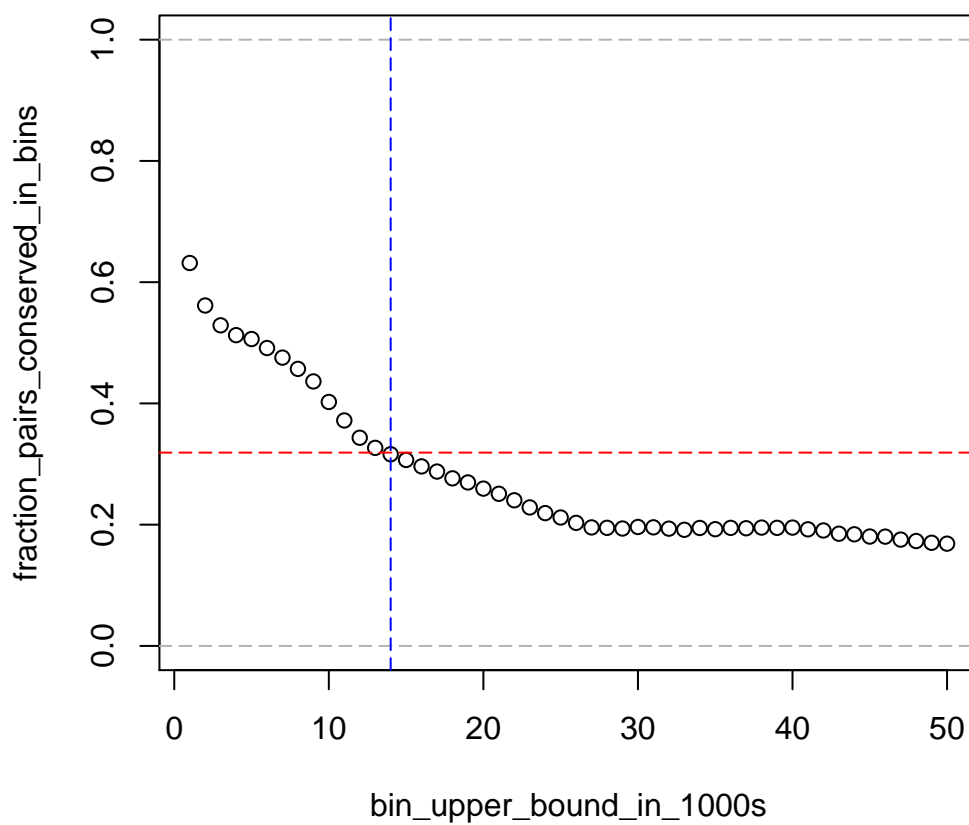

Supplement: s1 [file s1]

**Bin\_conservation\_minus\_bg\_CVA-1\_vs\_MN0810.1**  
**PD-0.455347**

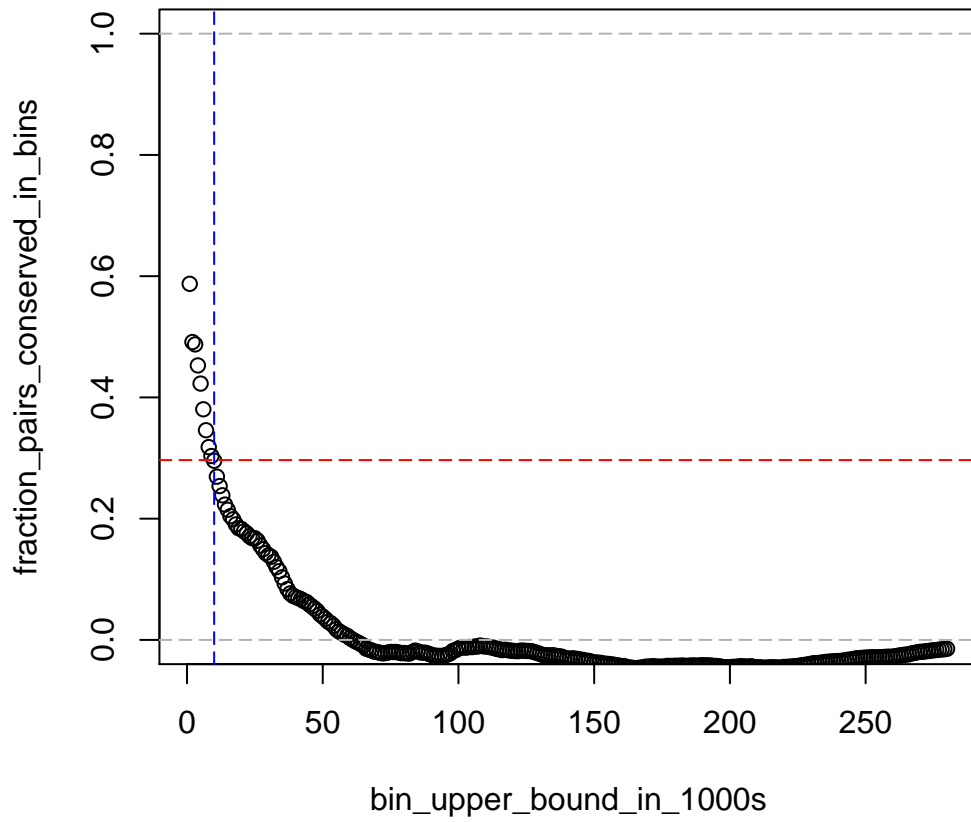

**Bin\_conservation\_minus\_bg\_CVA-1\_vs\_MN0810.1**  
**PD-0.455347**

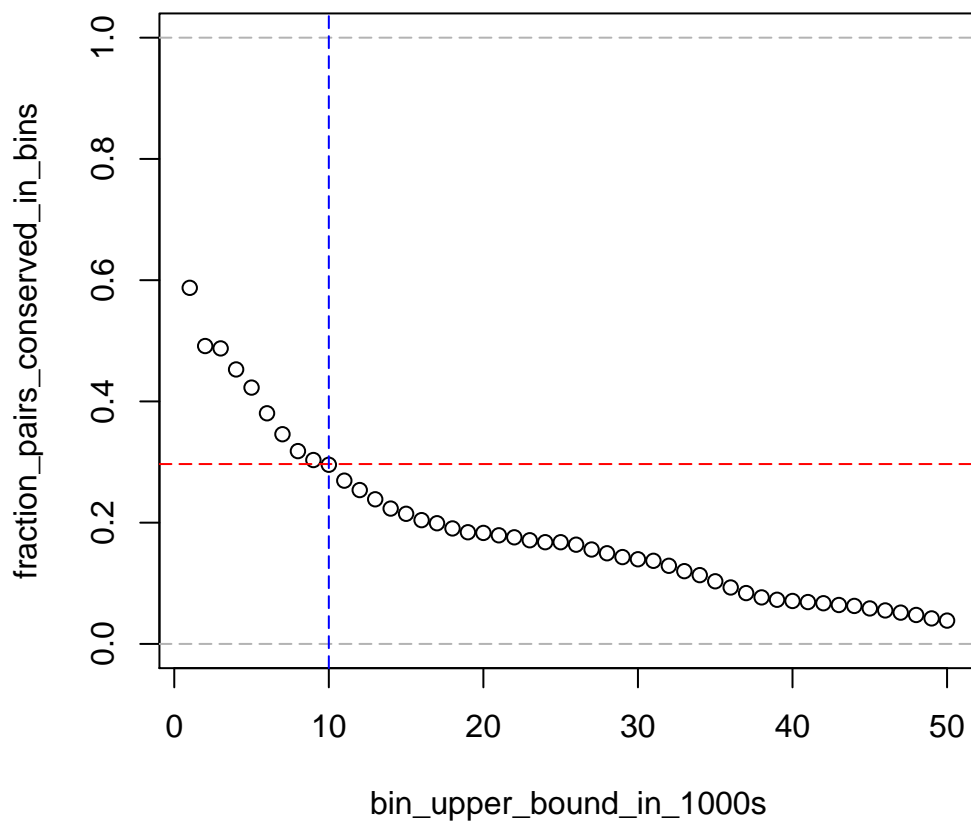

Supplement: s1 [file s1]

**Bin\_conservation\_minus\_bg\_ATCV1\_vs\_WI0606**  
**PD-0.012419**

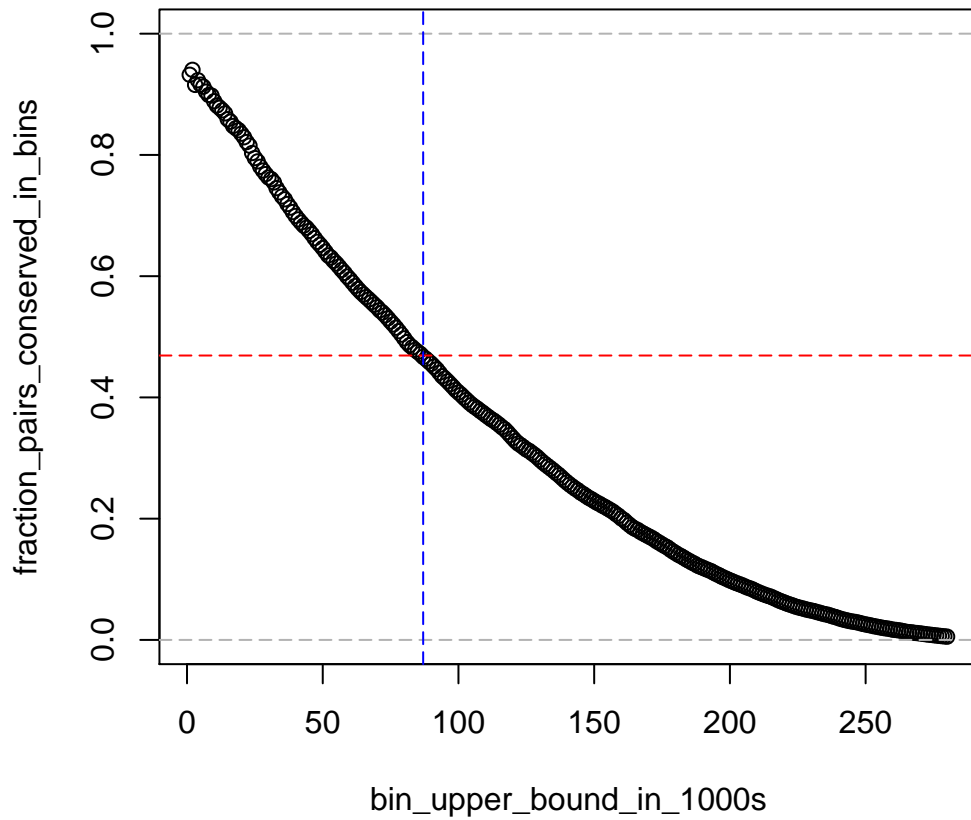

**Bin\_conservation\_minus\_bg\_ATCV1\_vs\_WI0606**  
**PD-0.012419**

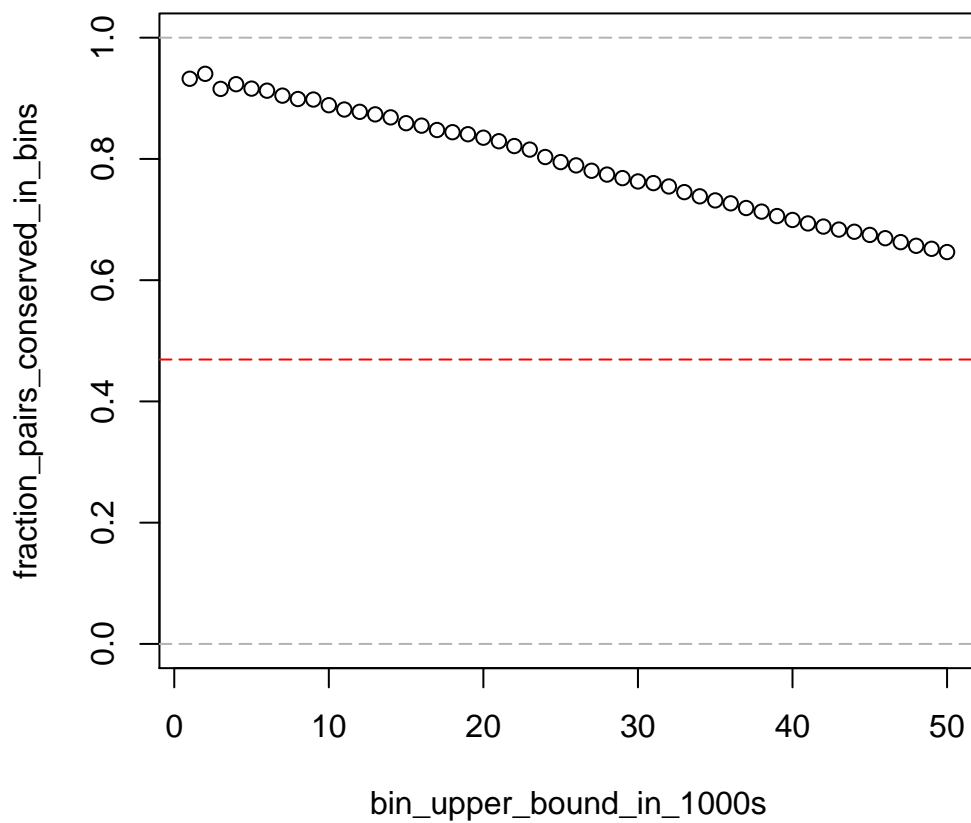

Supplement: s1 [file s1]

**Bin\_conservation\_minus\_bg\_AP110A\_vs\_NE-JV-4**  
**PD-0.642124**

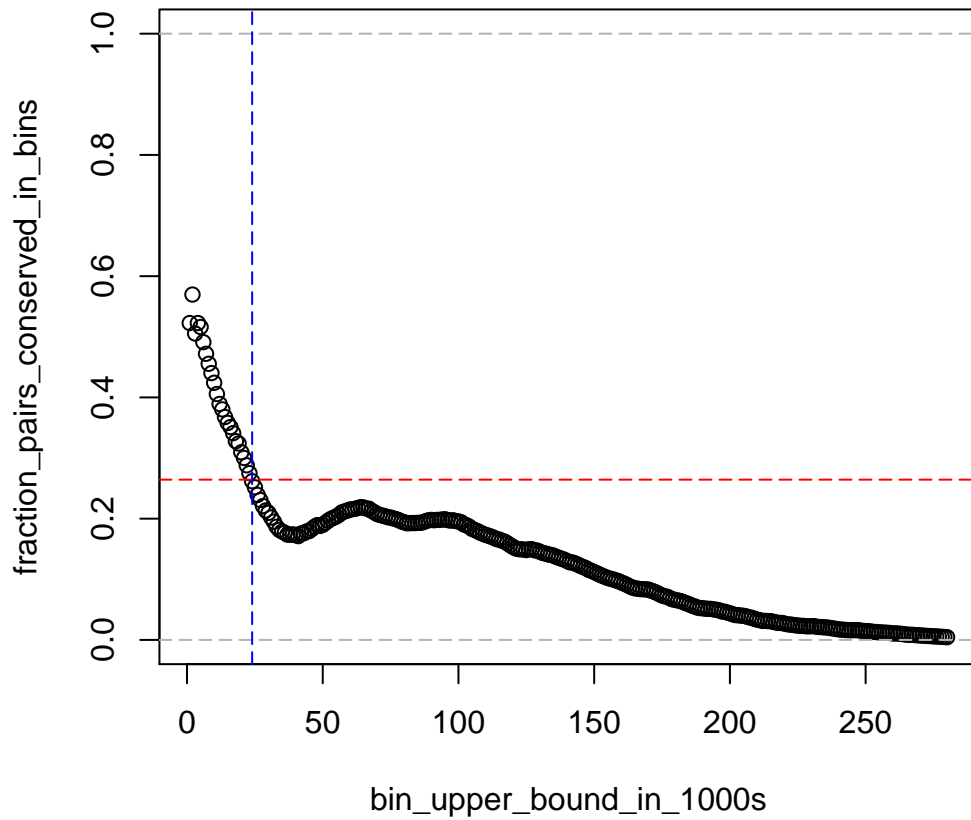

**Bin\_conservation\_minus\_bg\_AP110A\_vs\_NE-JV-4**  
**PD-0.642124**

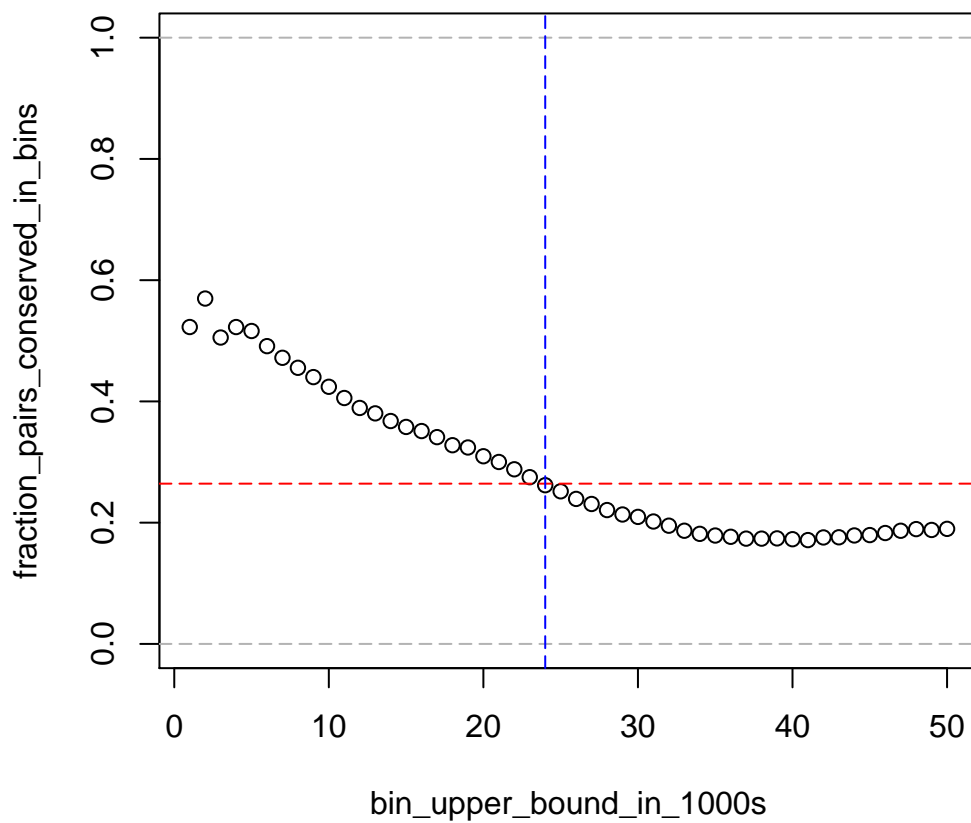

Supplement: s1 [file s1]

**Bin\_conservation\_minus\_bg\_CVA-1\_vs\_CvsA1**  
**PD-0.650141**

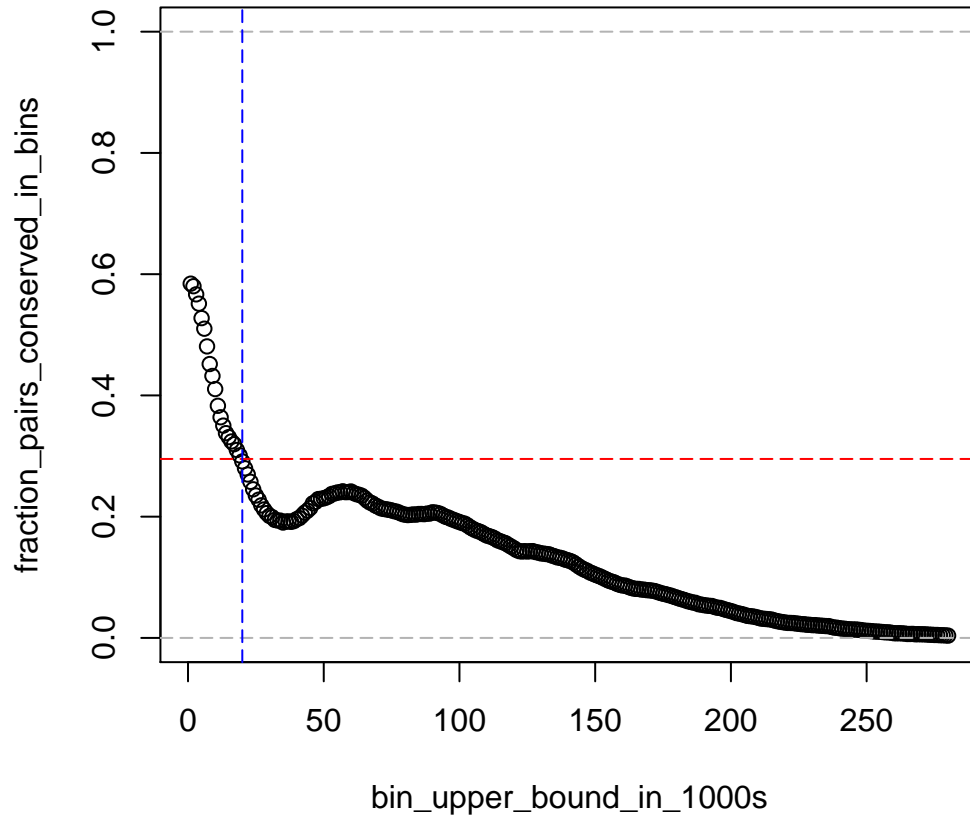

**Bin\_conservation\_minus\_bg\_CVA-1\_vs\_CvsA1**  
**PD-0.650141**

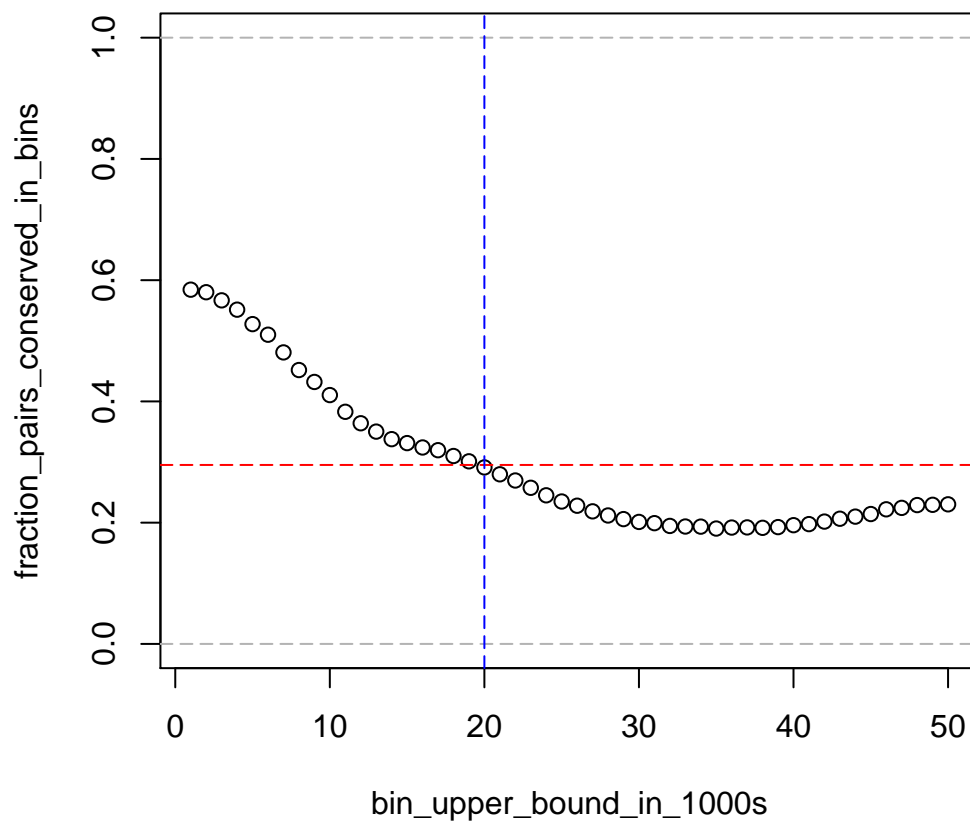

Supplement: s1 [file s1]

**Bin\_conservation\_minus\_bg\_AN69C\_vs\_NE-JV-3**  
**PD-0.678795**

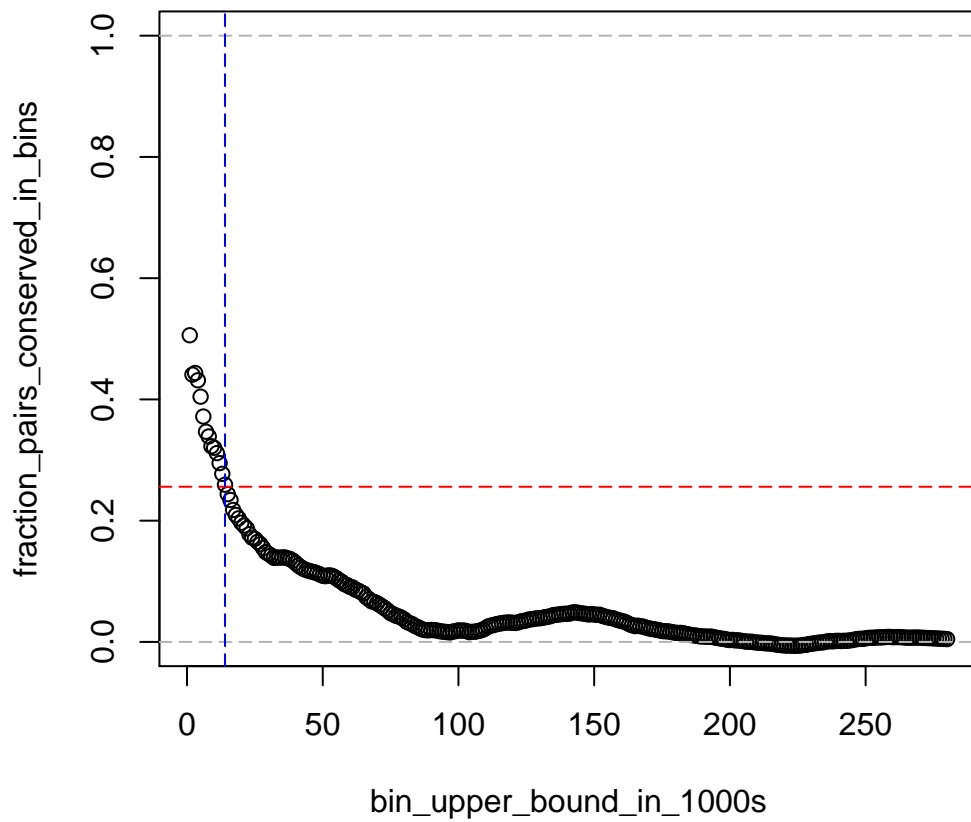

**Bin\_conservation\_minus\_bg\_AN69C\_vs\_NE-JV-3**  
**PD-0.678795**

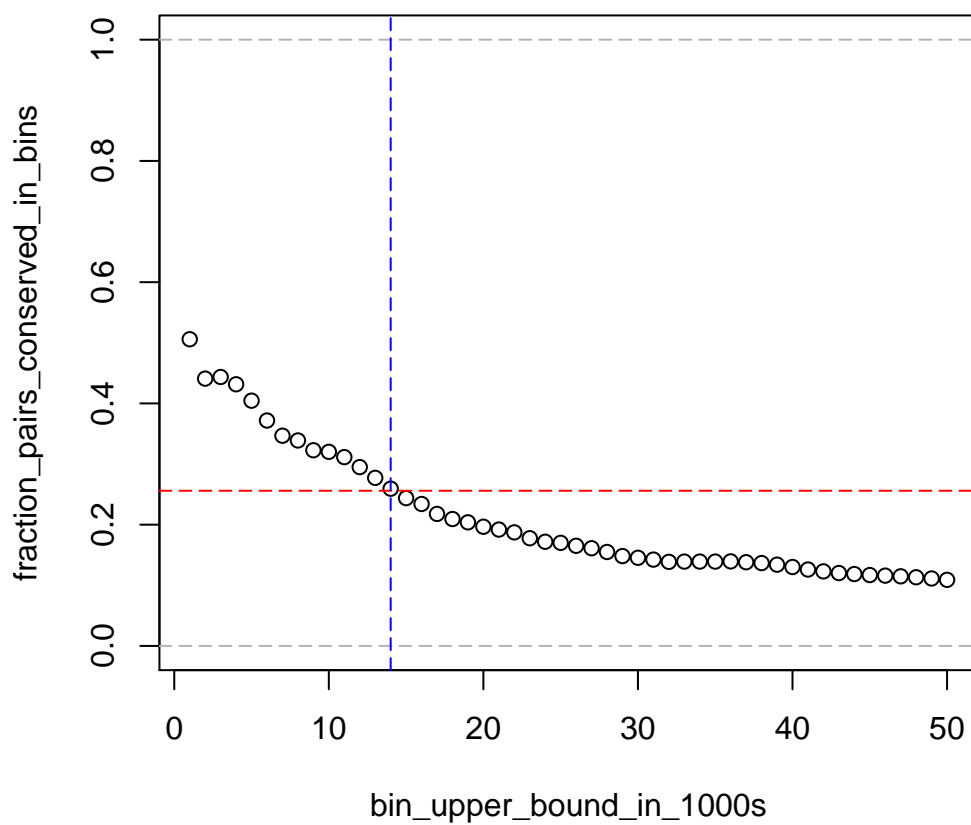

Supplement: s1 [file s1]

**Bin\_conservation\_minus\_bg\_MA-1E\_vs\_MO0605SPH**  
**PD-0.698191**

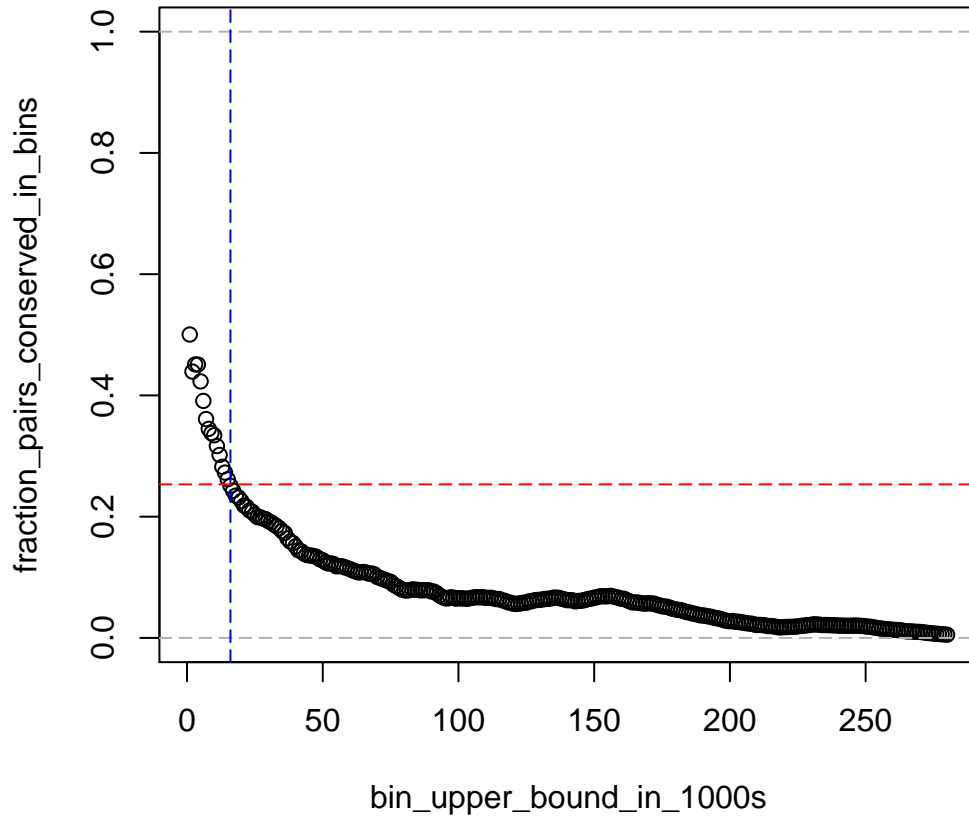

**Bin\_conservation\_minus\_bg\_MA-1E\_vs\_MO0605SPH**  
**PD-0.698191**

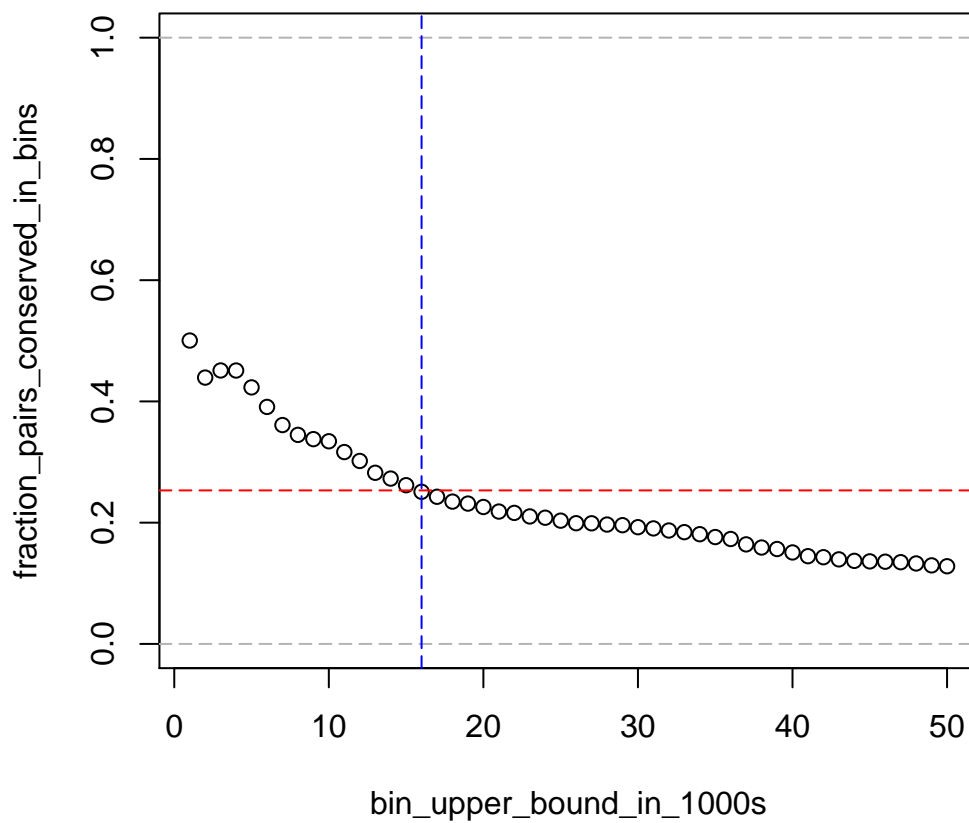

Supplement: s1 [file s1]

**Bin\_conservation\_minus\_bg\_AN69C\_vs\_AR158**  
**PD-0.134302**

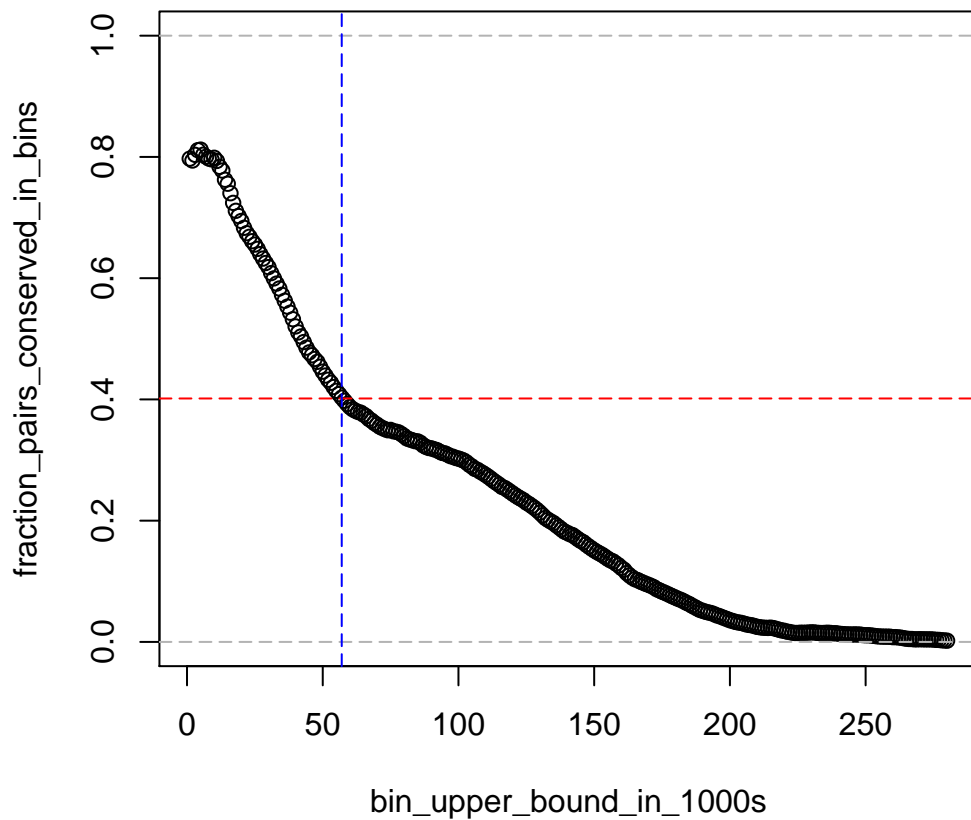

**Bin\_conservation\_minus\_bg\_AN69C\_vs\_AR158**  
**PD-0.134302**

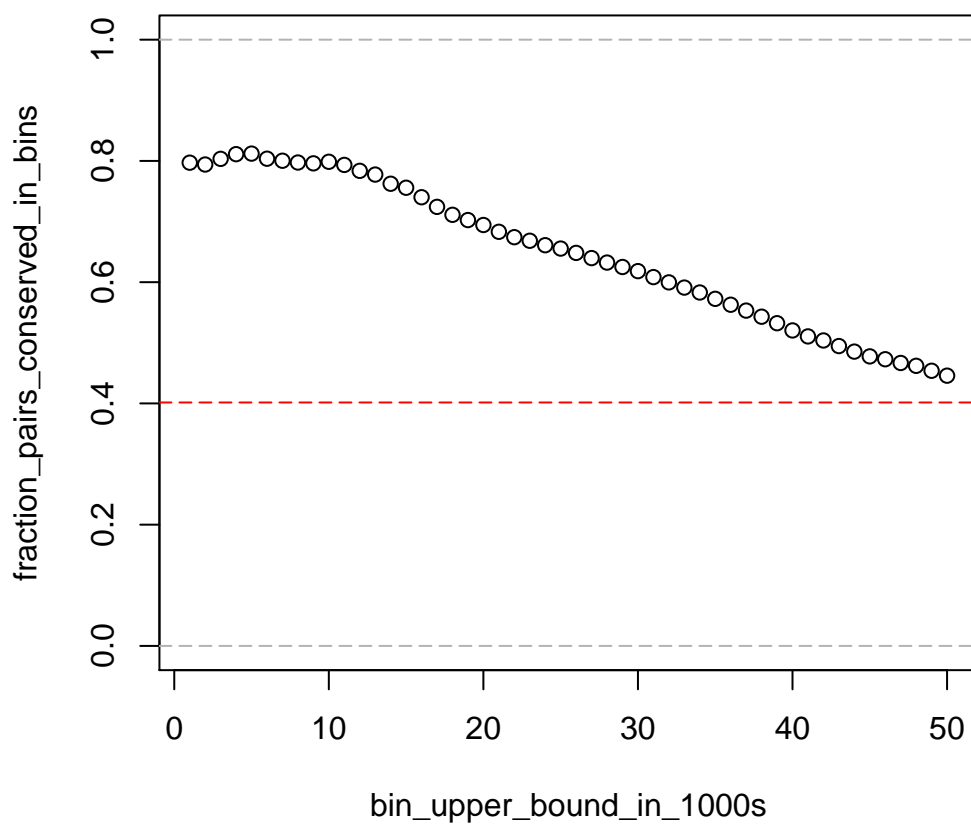

Supplement: s1 [file s1]

**Bin\_conservation\_minus\_bg\_Can0610SP\_vs\_CVA-1**  
**PD-0.457853**

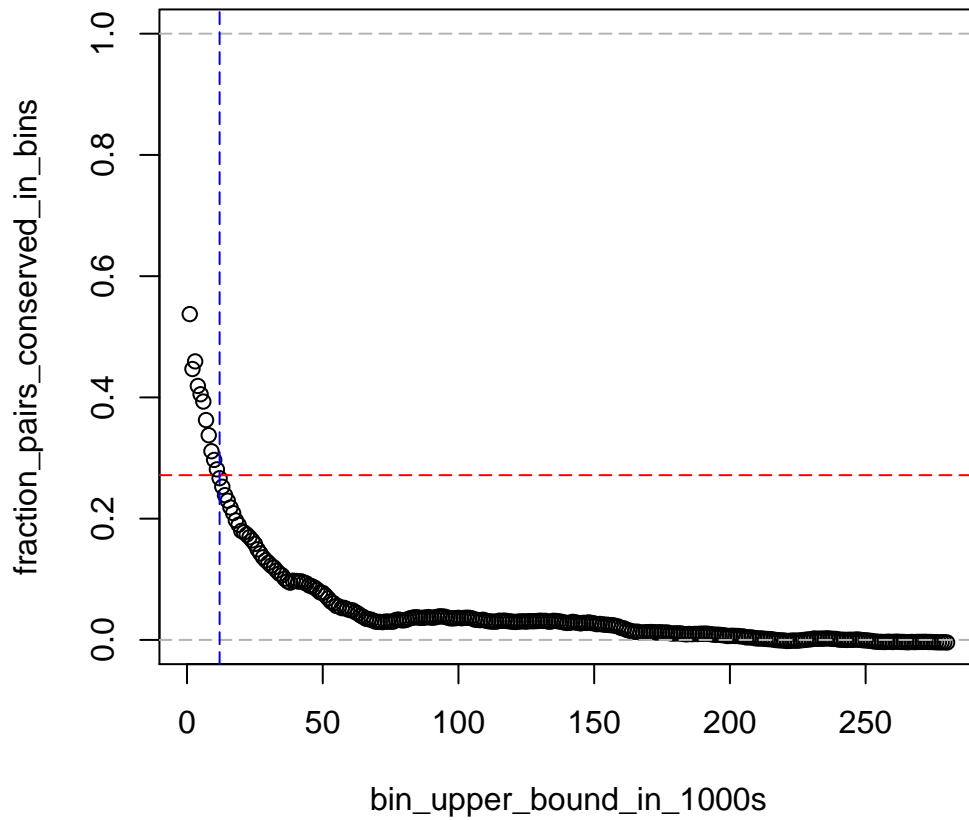

**Bin\_conservation\_minus\_bg\_Can0610SP\_vs\_CVA-1**  
**PD-0.457853**

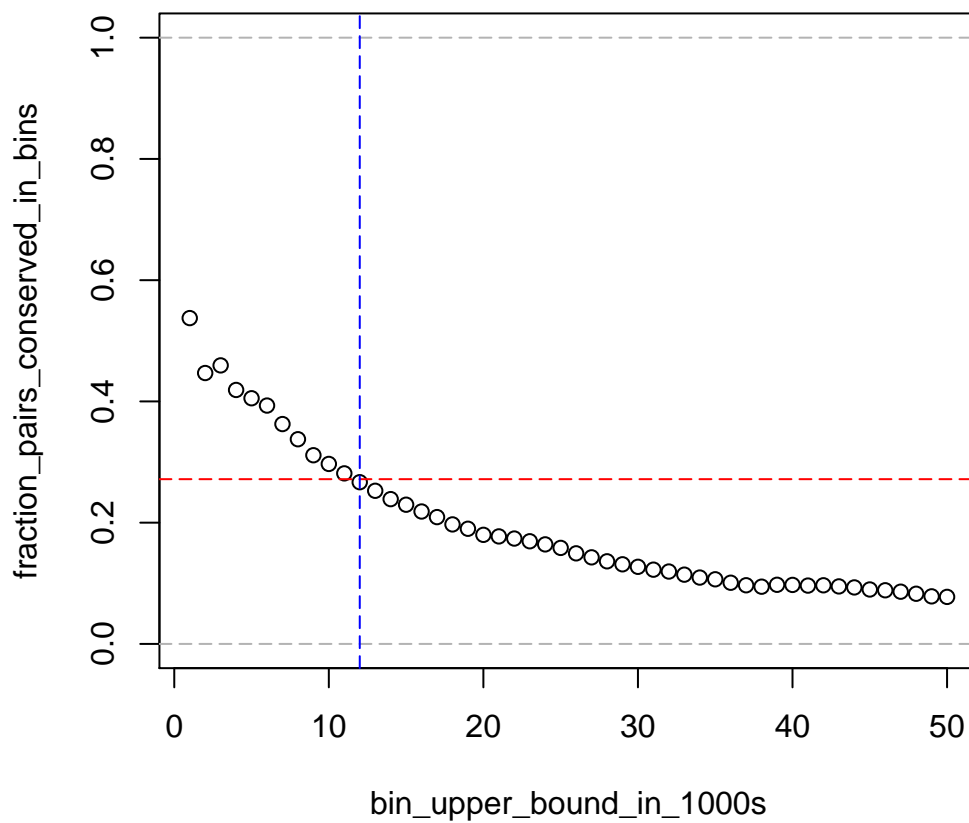

Supplement: s1 [file s1]

**Bin\_conservation\_minus\_bg\_CvsA1\_vs\_MO0605SPH**  
**PD-0.698139**

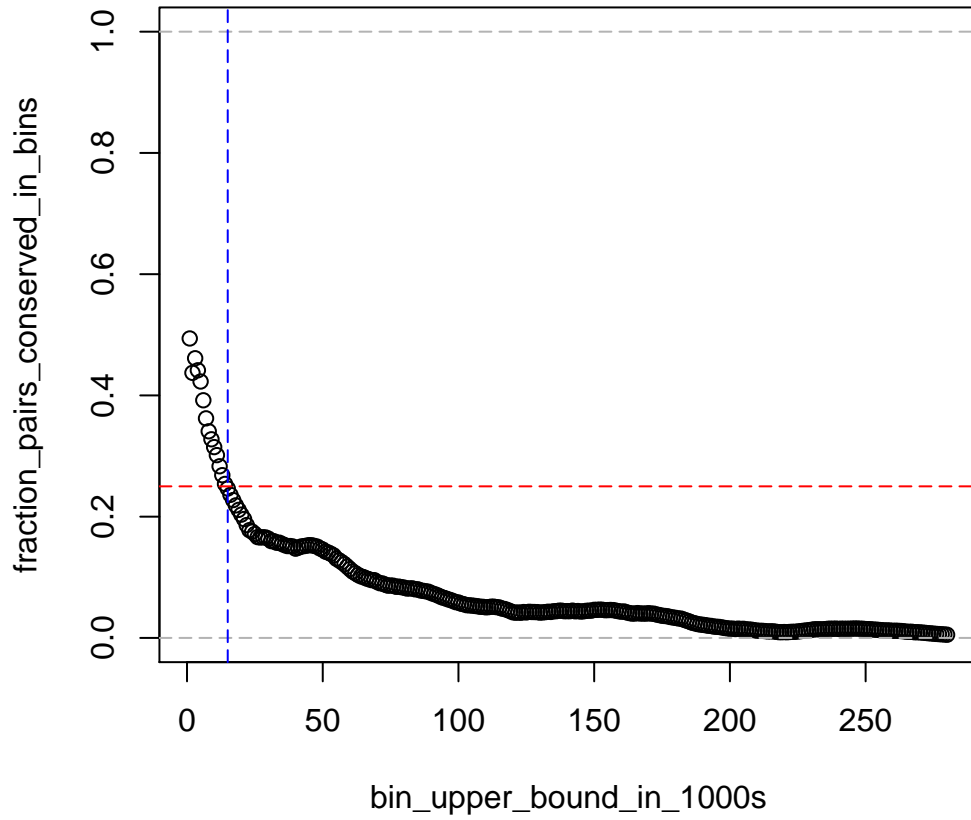

**Bin\_conservation\_minus\_bg\_CvsA1\_vs\_MO0605SPH**  
**PD-0.698139**

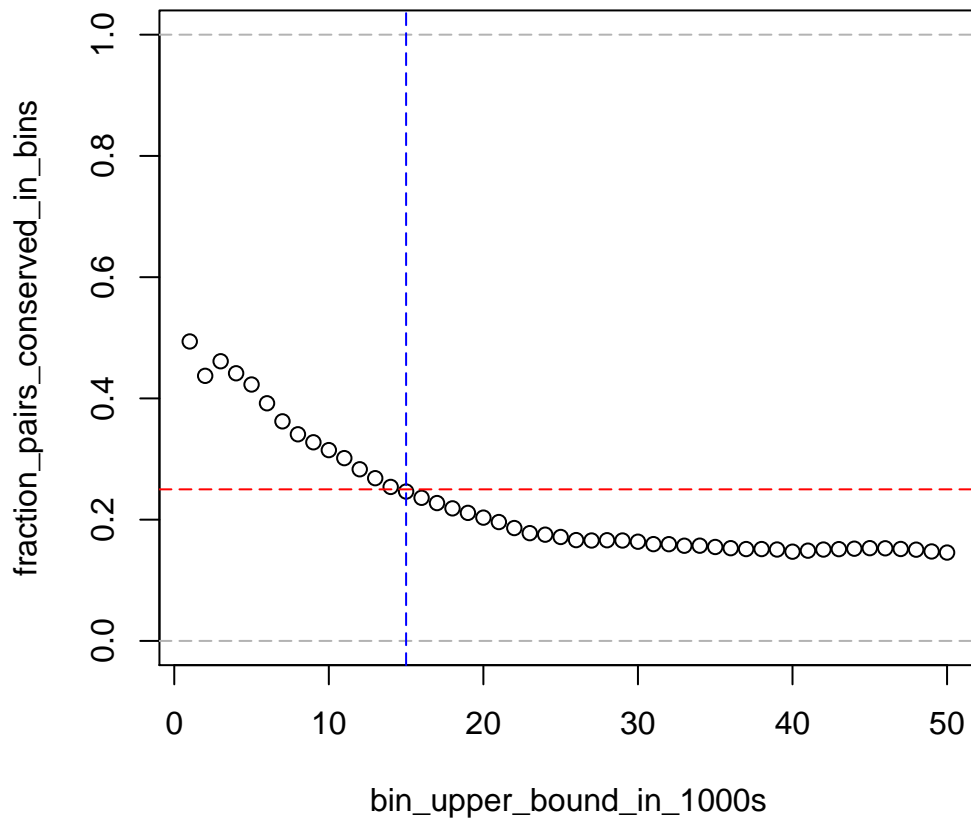

Supplement: s1 [file s1]

**Bin\_conservation\_minus\_bg\_Can0610SP\_vs\_CvsA1**  
**PD-0.69487**

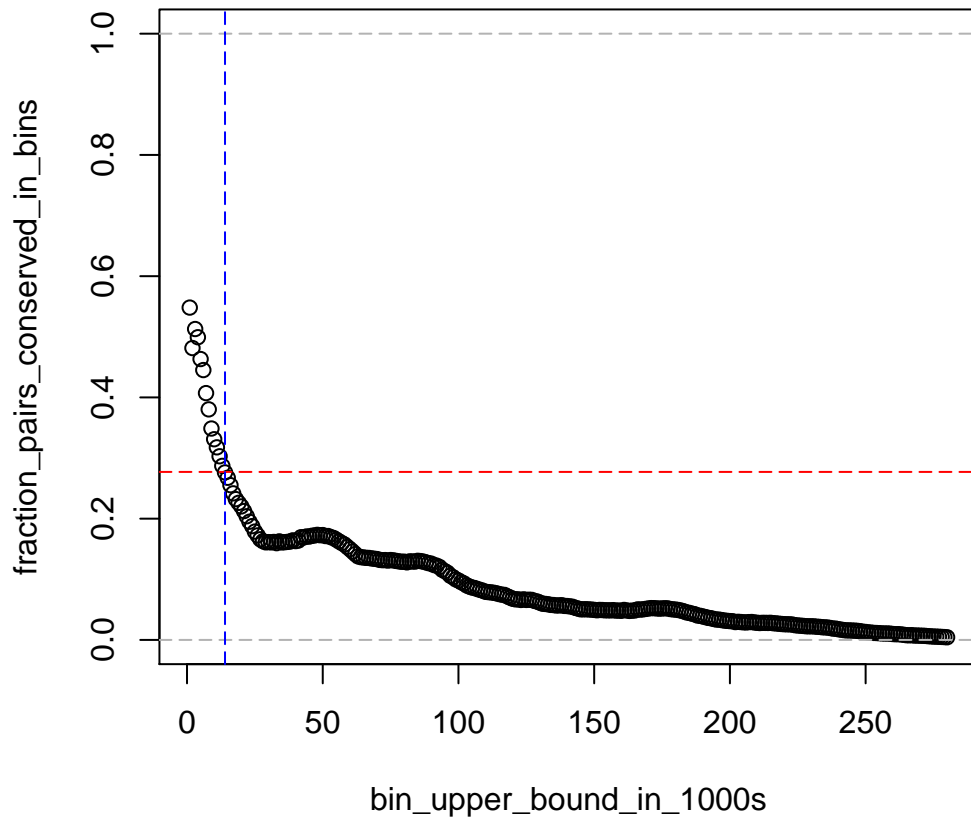

**Bin\_conservation\_minus\_bg\_Can0610SP\_vs\_CvsA1**  
**PD-0.69487**

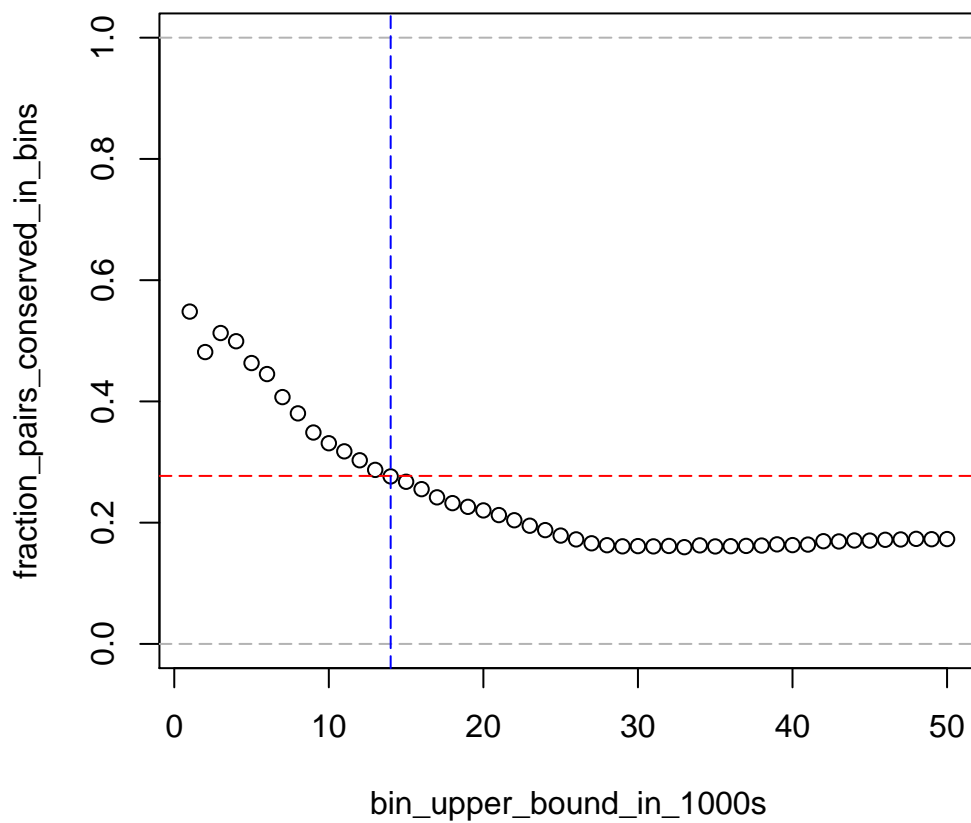

Supplement: s1 [file s1]

**Bin\_conservation\_minus\_bg\_ATCV1\_vs\_IL-5-2s1**  
**PD-0.70272**

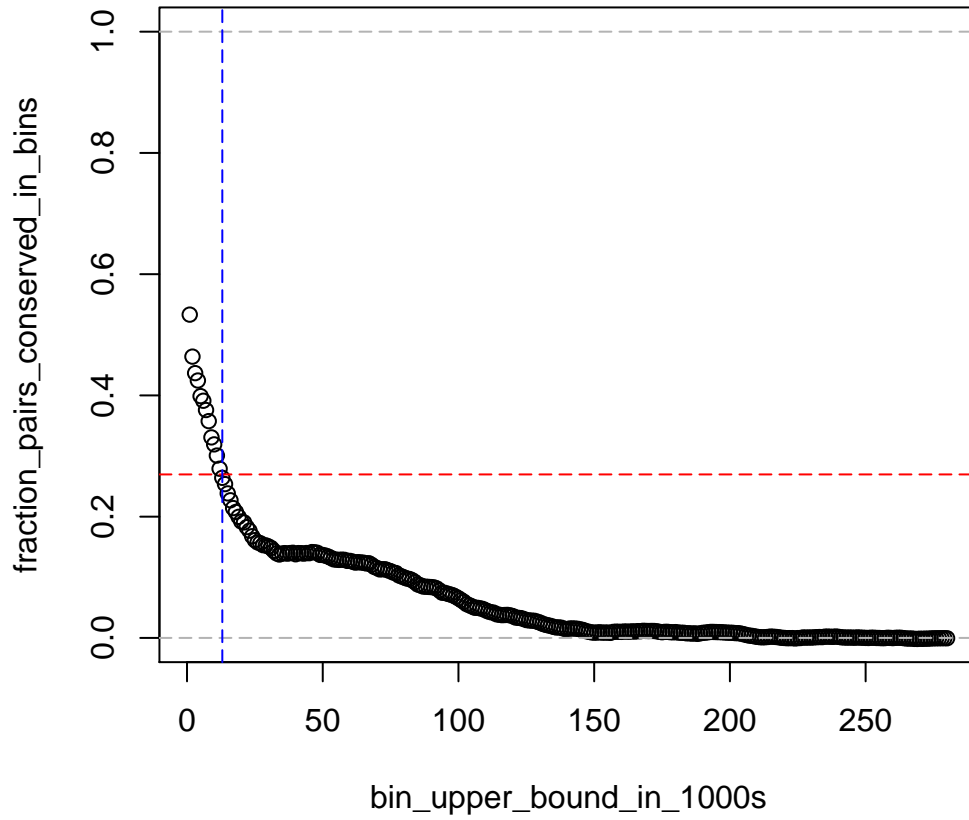

**Bin\_conservation\_minus\_bg\_ATCV1\_vs\_IL-5-2s1**  
**PD-0.70272**

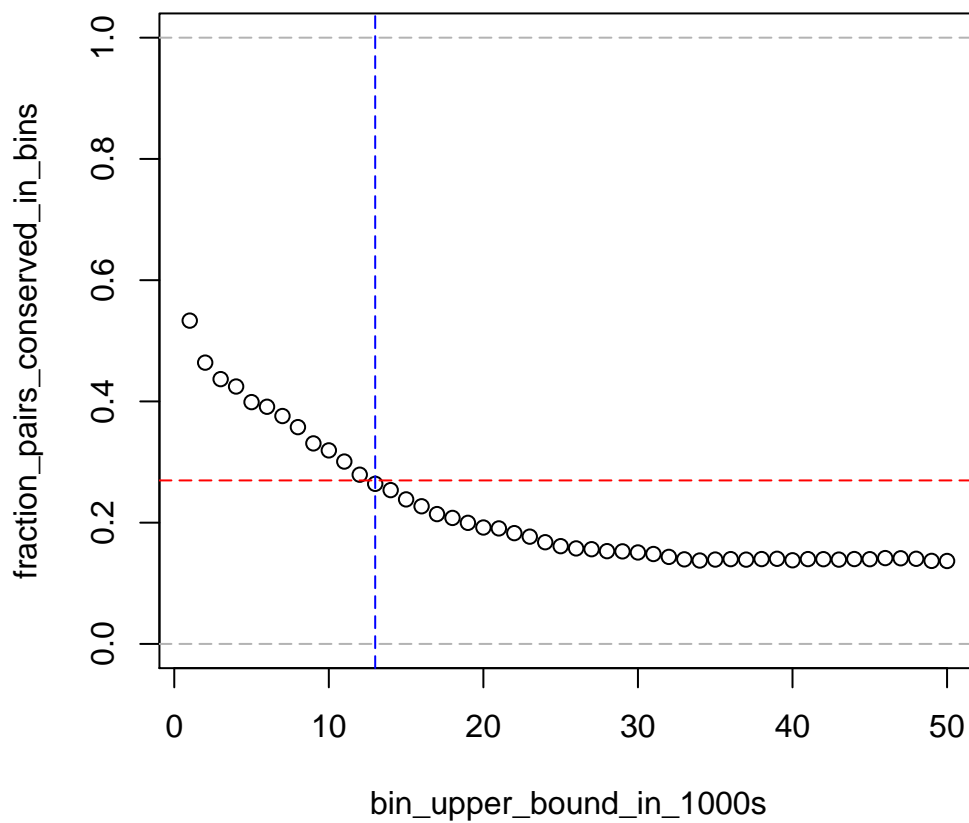

Supplement: s1 [file s1]

**Bin\_conservation\_minus\_bg\_AN69C\_vs\_CVA-1**  
**PD-0.633724**

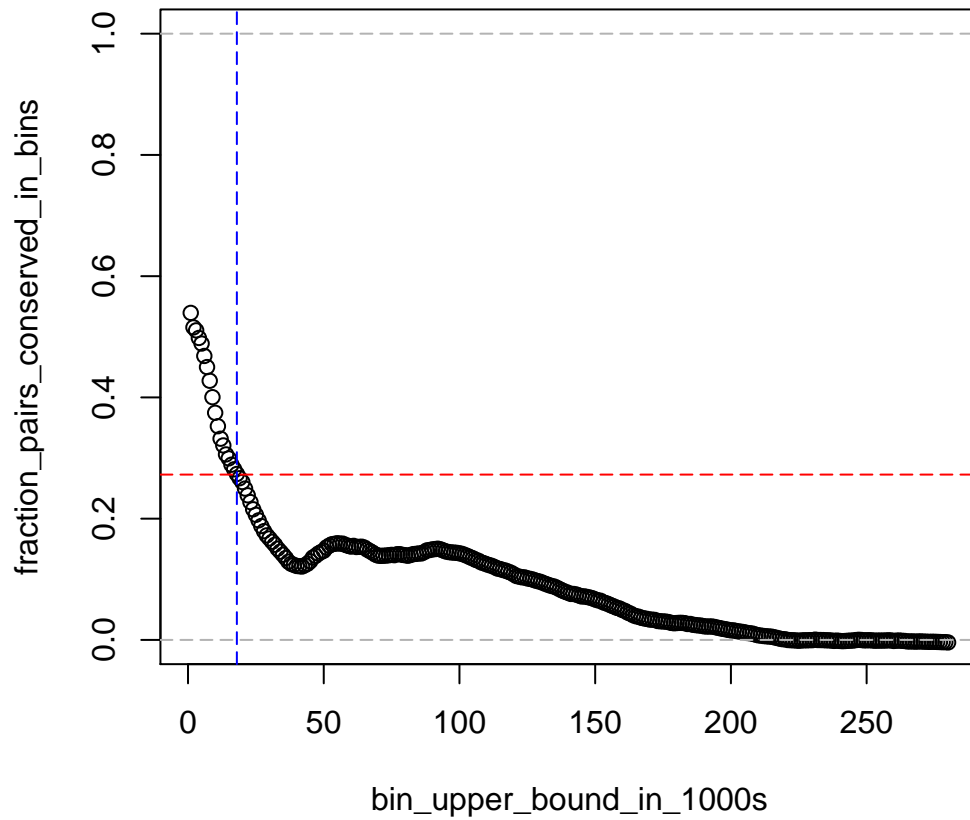

**Bin\_conservation\_minus\_bg\_AN69C\_vs\_CVA-1**  
**PD-0.633724**

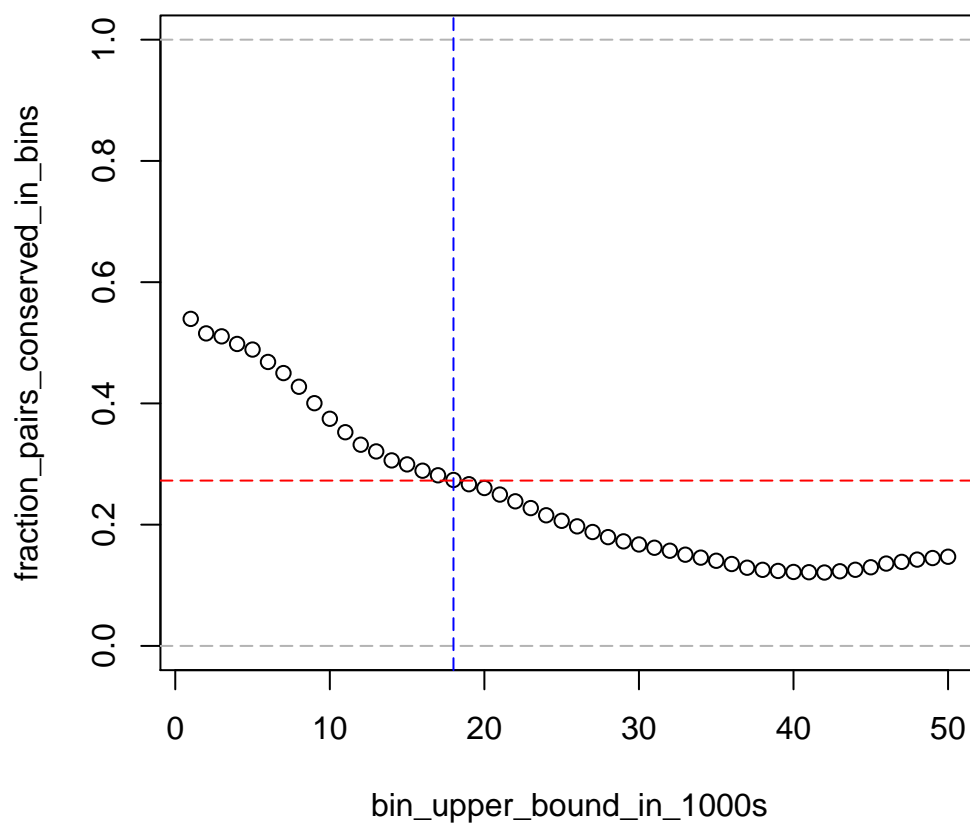

Supplement: s1 [file s1]

**Bin\_conservation\_minus\_bg\_CviKI\_vs\_NY2A**  
**PD-0.15416**

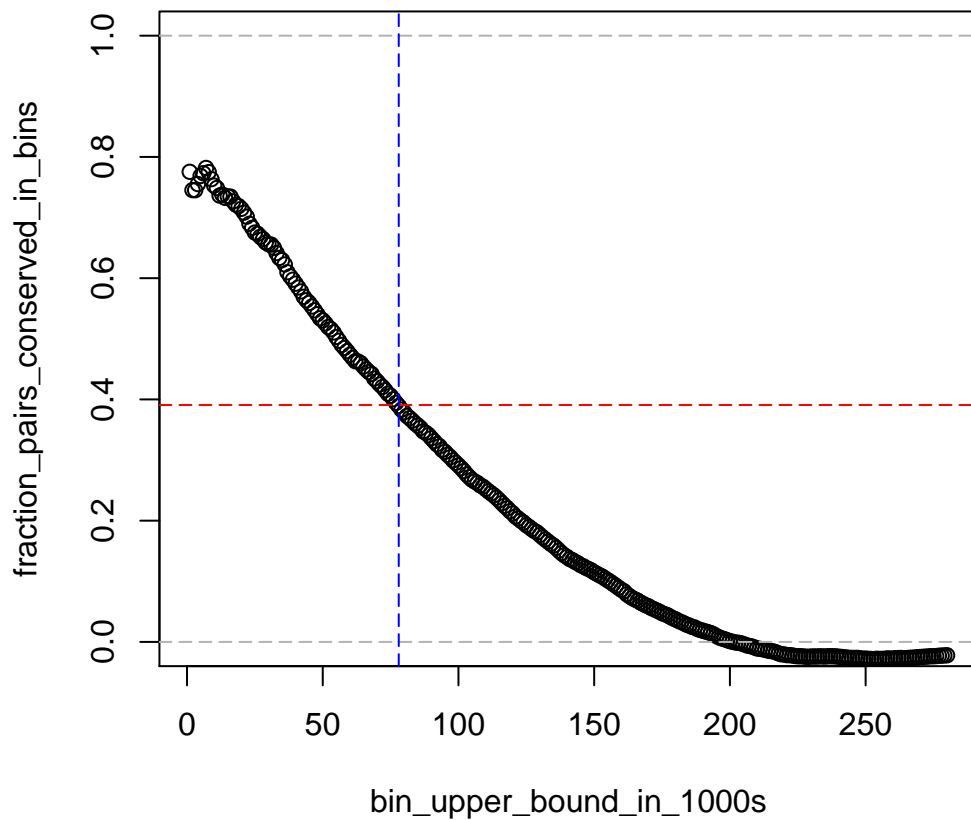

**Bin\_conservation\_minus\_bg\_CviKI\_vs\_NY2A**  
**PD-0.15416**

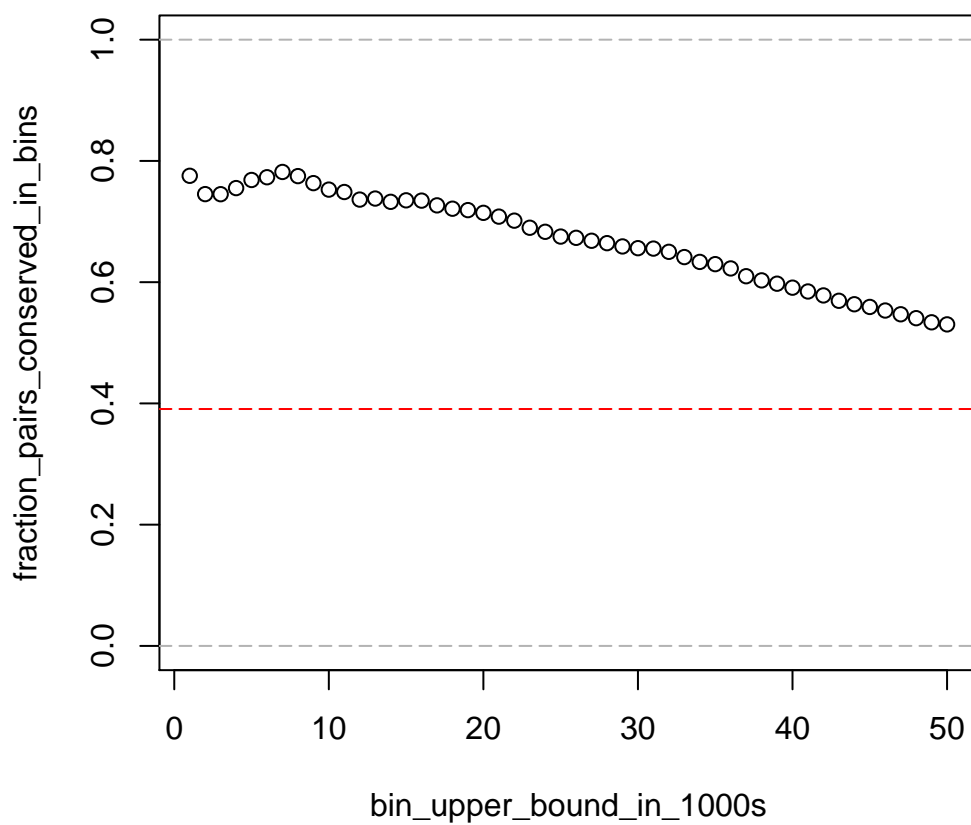

Supplement: s1 [file s1]

**Bin\_conservation\_minus\_bg\_AN69C\_vs\_NE-JV-4**  
**PD-0.004605**

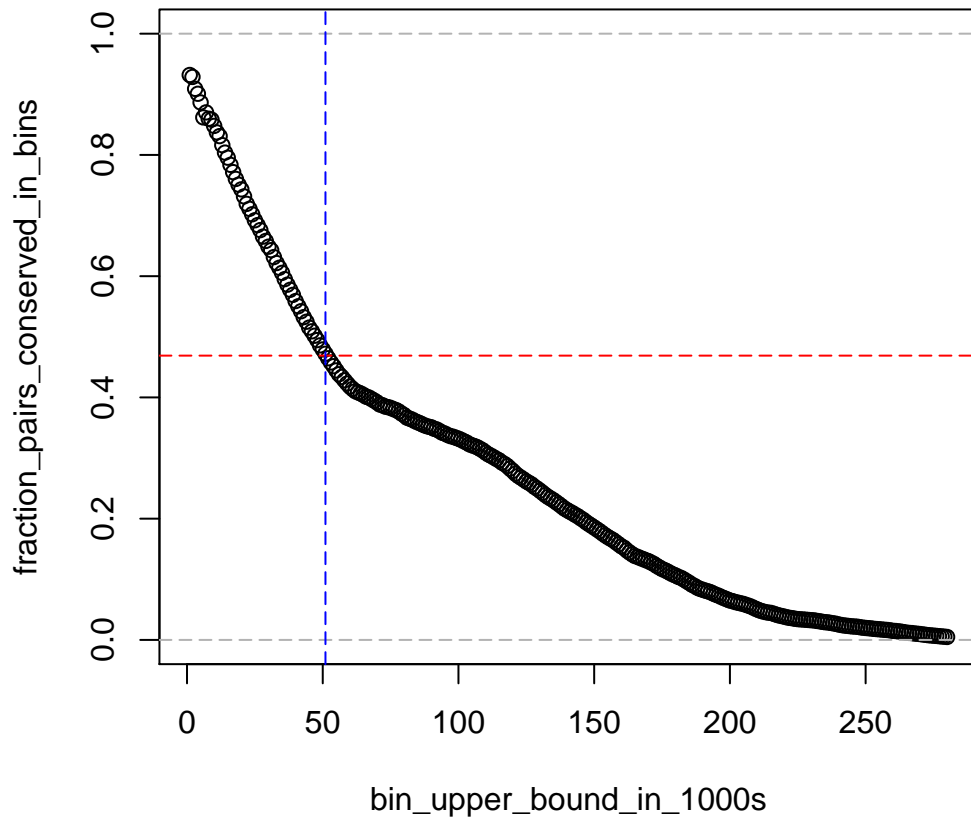

**Bin\_conservation\_minus\_bg\_AN69C\_vs\_NE-JV-4**  
**PD-0.004605**

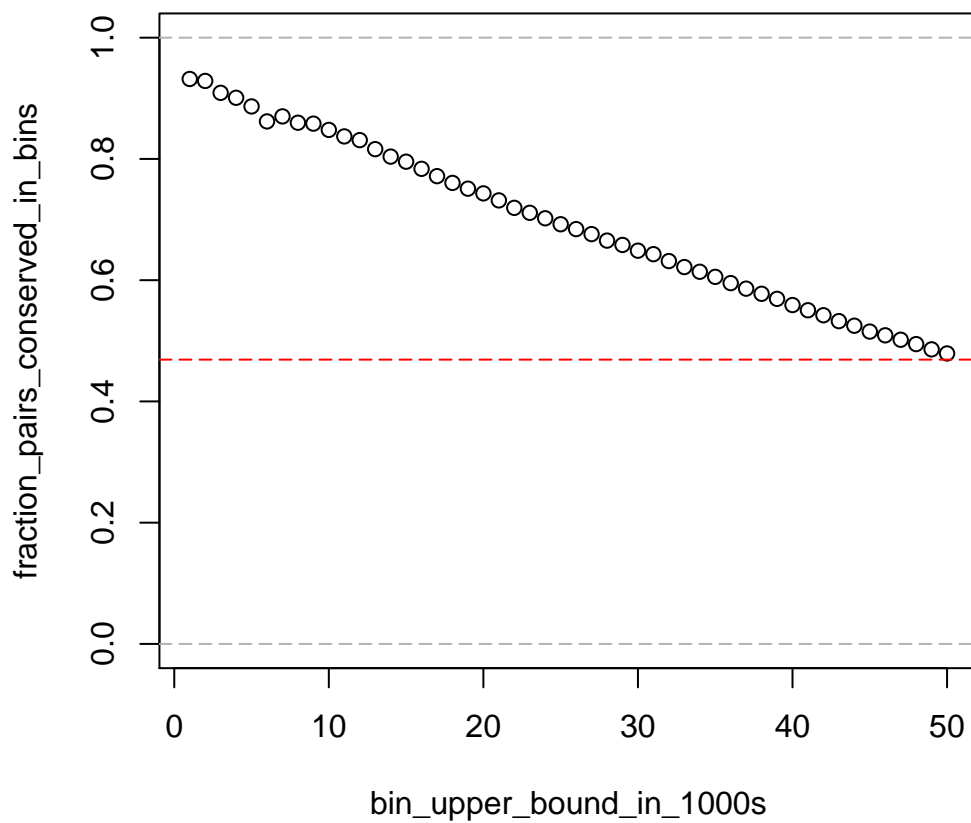

Supplement: s1 [file s1]
