# Supplementary figures and images for: Gene Gangs of the Chloroviruses: Conserved Clusters of Collinear Monocistronic Genes (part 9 of 9)
Source: MDPI journal article supplement (doi:10.3390/v10100576), 2018-10-20

**Bin\_conservation\_minus\_bg\_CVA-1\_vs\_NY-2B**  
**PD-0.660874**

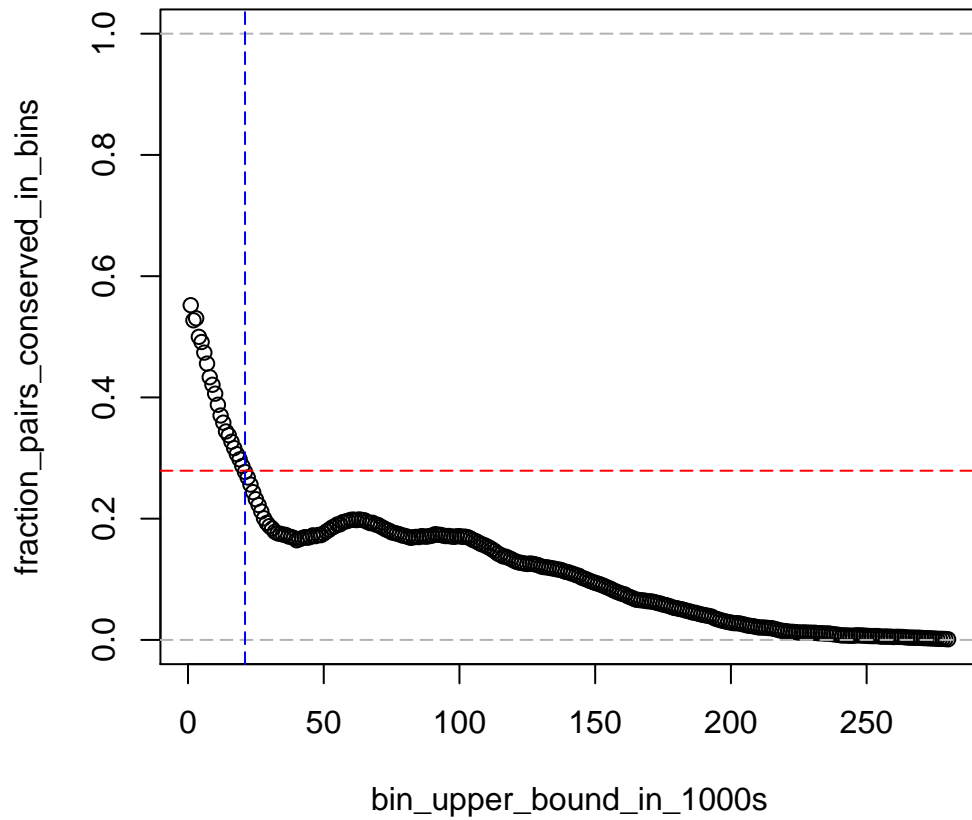

**Bin\_conservation\_minus\_bg\_CVA-1\_vs\_NY-2B**  
**PD-0.660874**

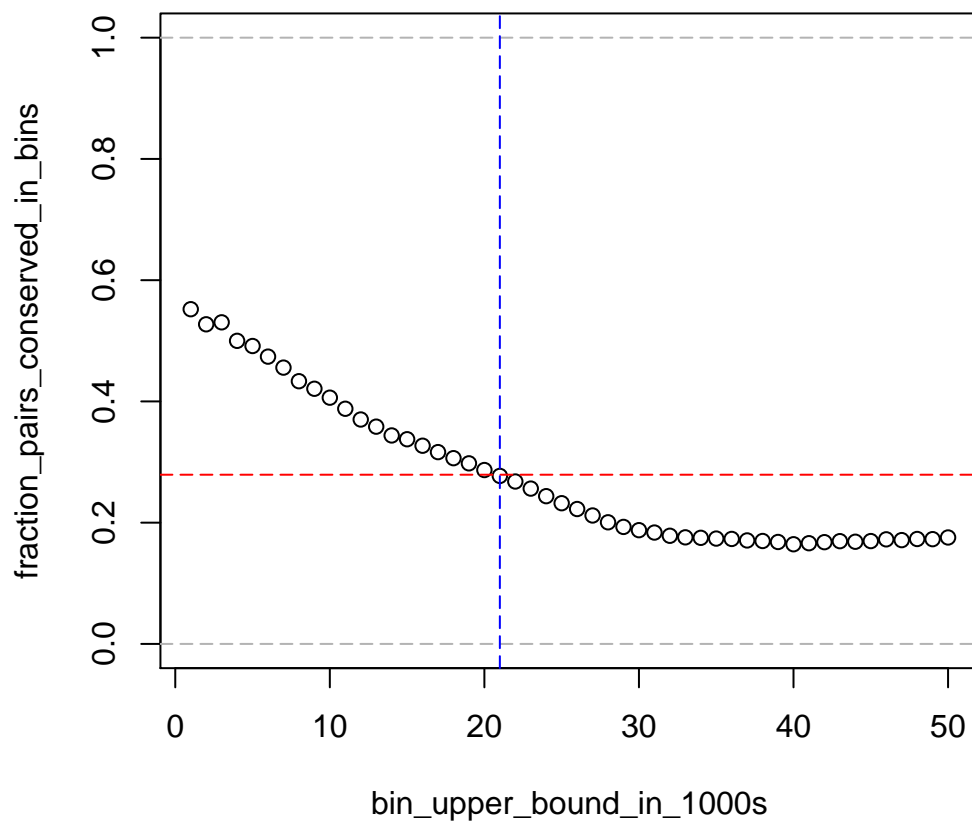

Supplement: s1 [file s1]

**Bin\_conservation\_minus\_bg\_AR158\_vs\_CVM-1**  
**PD-0.662701**

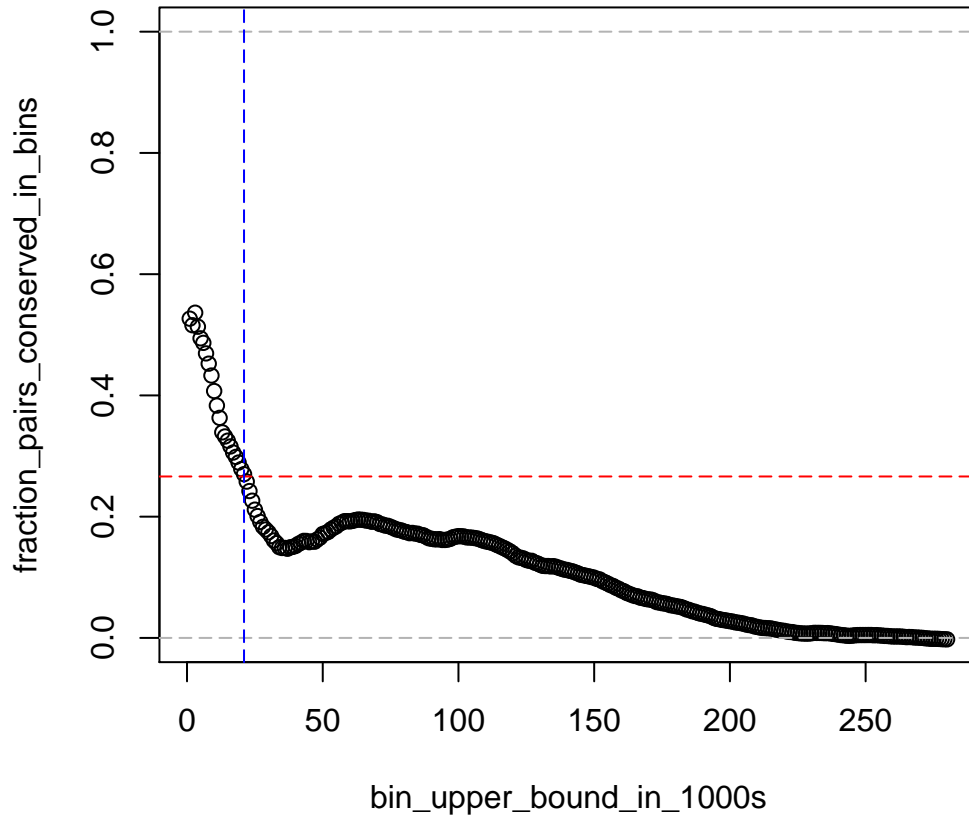

**Bin\_conservation\_minus\_bg\_AR158\_vs\_CVM-1**  
**PD-0.662701**

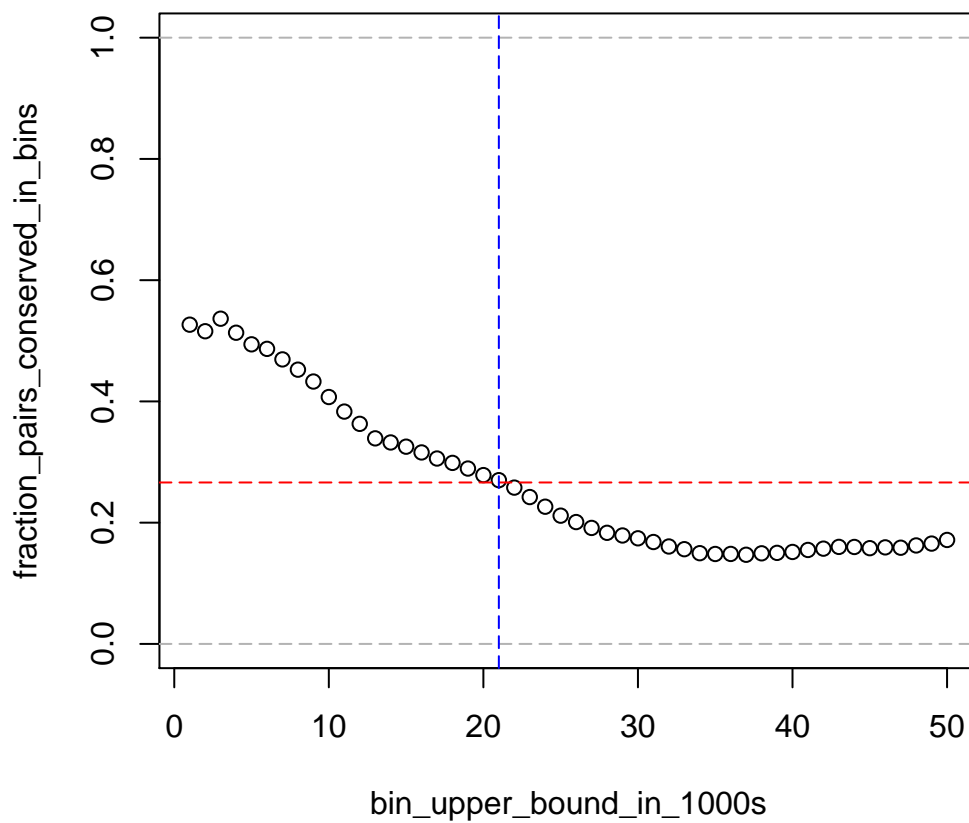

Supplement: s1 [file s1]

**Bin\_conservation\_minus\_bg\_NYs-1\_vs\_OR0704.3**  
**PD-0.702907**

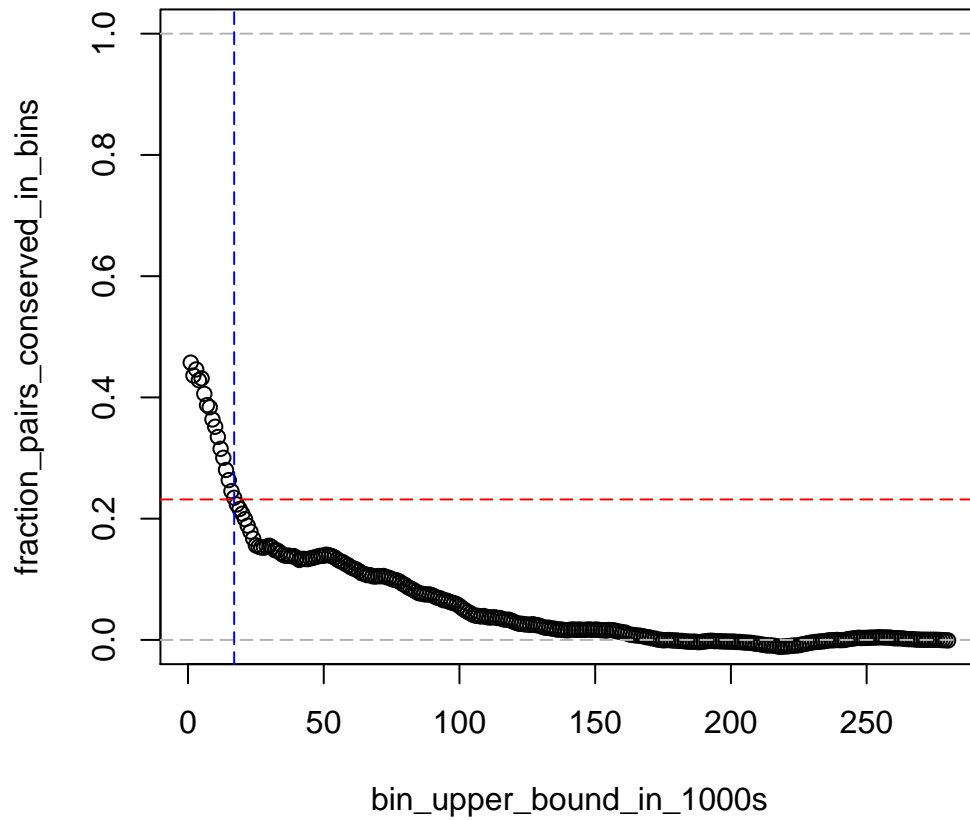

**Bin\_conservation\_minus\_bg\_NYs-1\_vs\_OR0704.3**  
**PD-0.702907**

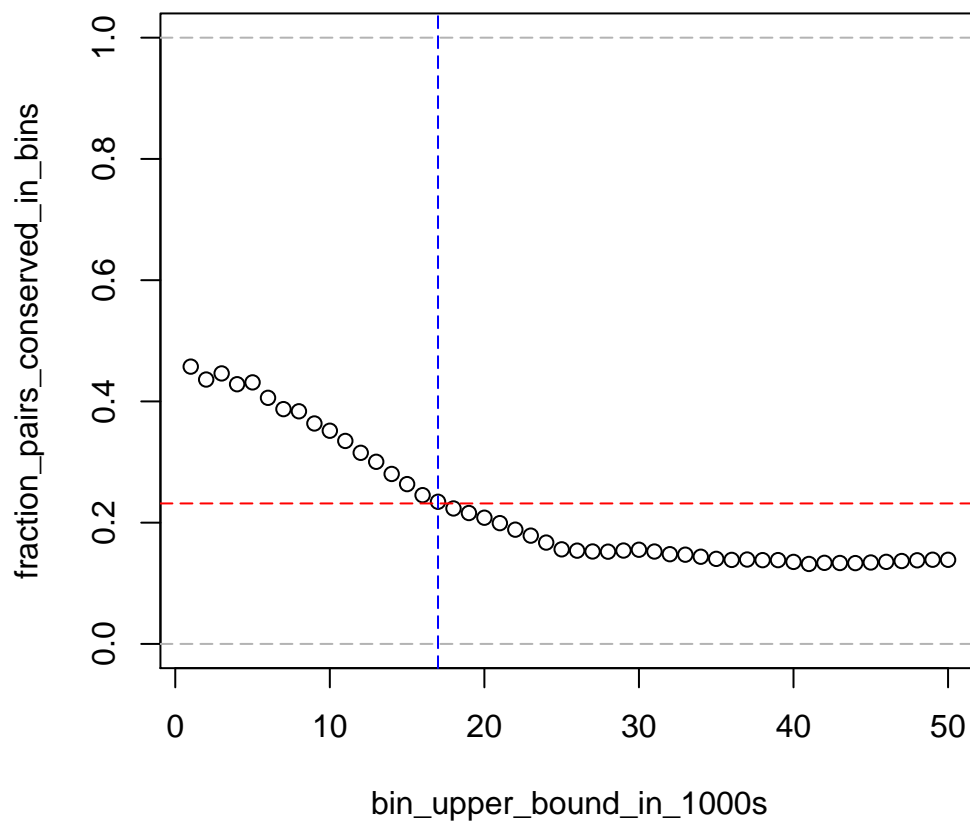

Supplement: s1 [file s1]

**Bin\_conservation\_minus\_bg\_Can18-4\_vs\_CZ-2**  
**PD-0.05137**

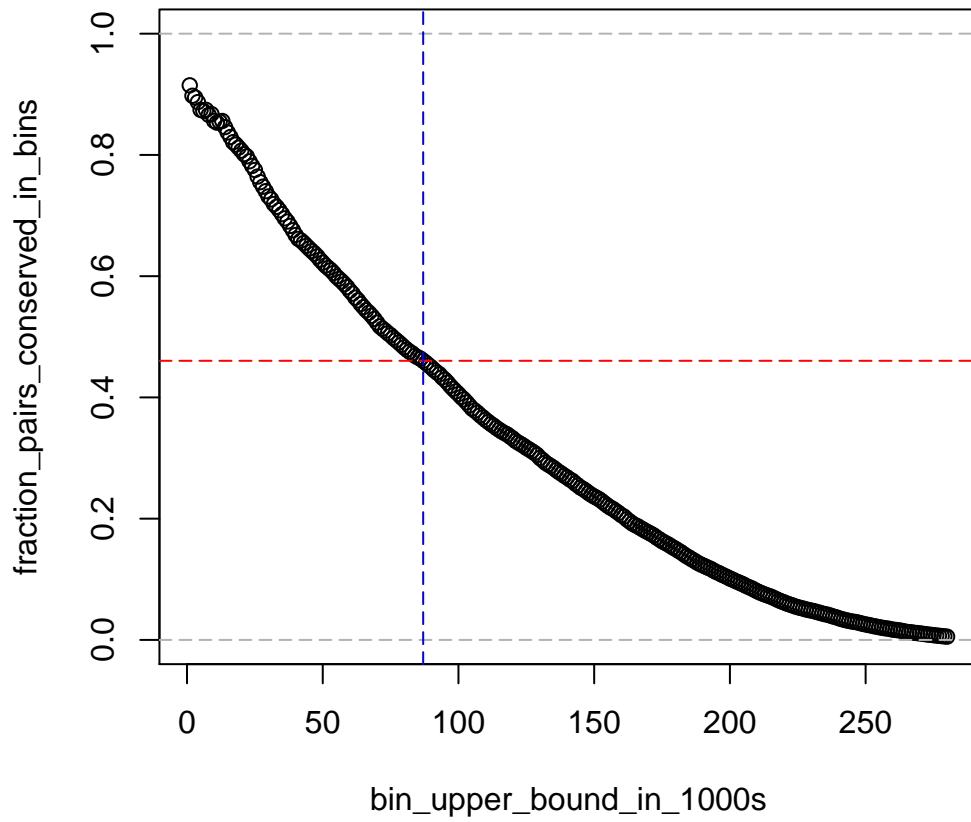

**Bin\_conservation\_minus\_bg\_Can18-4\_vs\_CZ-2**  
**PD-0.05137**

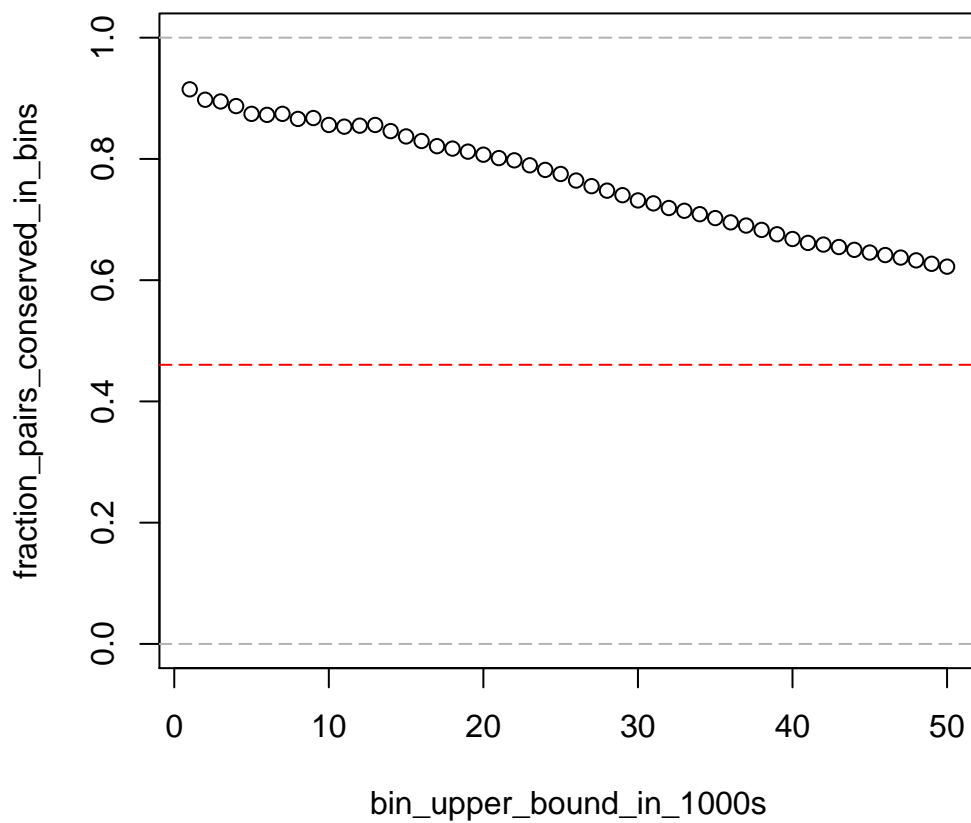

Supplement: s1 [file s1]

**Bin\_conservation\_minus\_bg\_CVG-1\_vs\_NE-JV-4**  
**PD-0.641406**

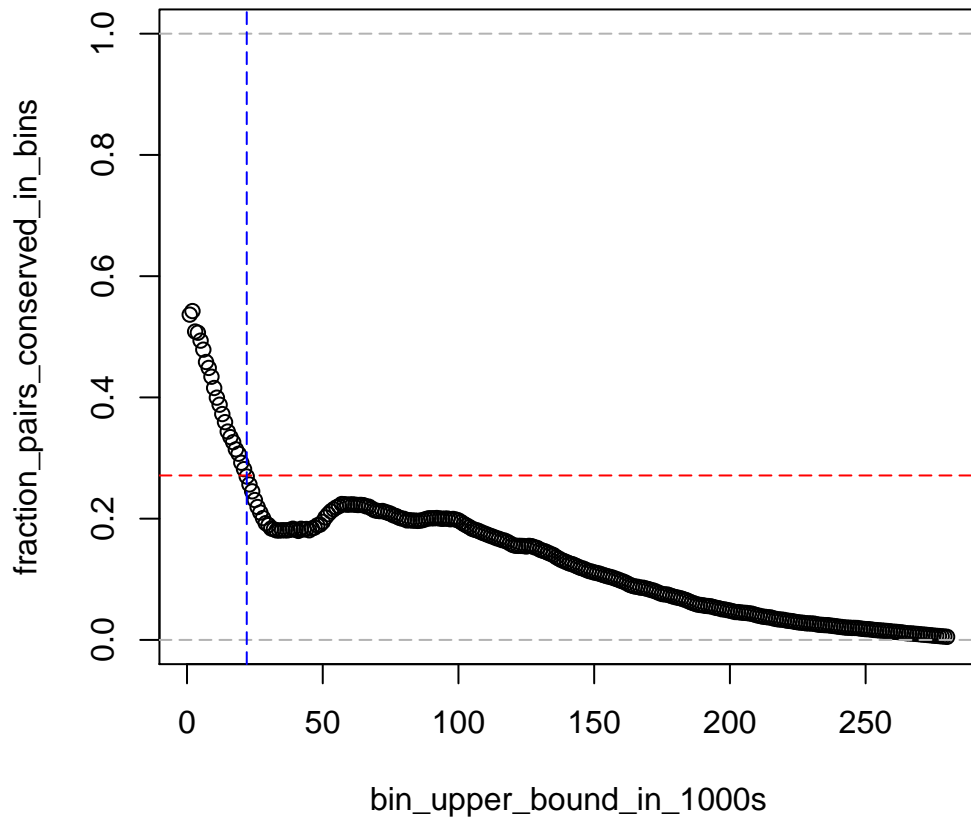

**Bin\_conservation\_minus\_bg\_CVG-1\_vs\_NE-JV-4**  
**PD-0.641406**

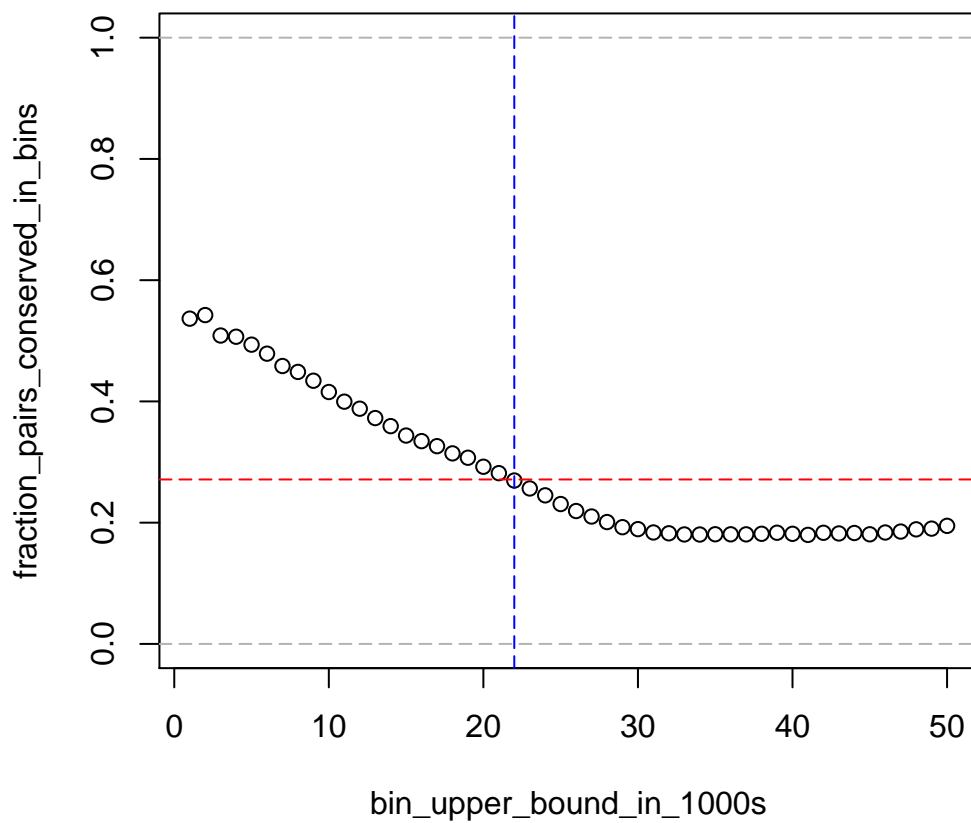

Supplement: s1 [file s1]

**Bin\_conservation\_minus\_bg\_CVM-1\_vs\_NTS-1**  
**PD-0.454347**

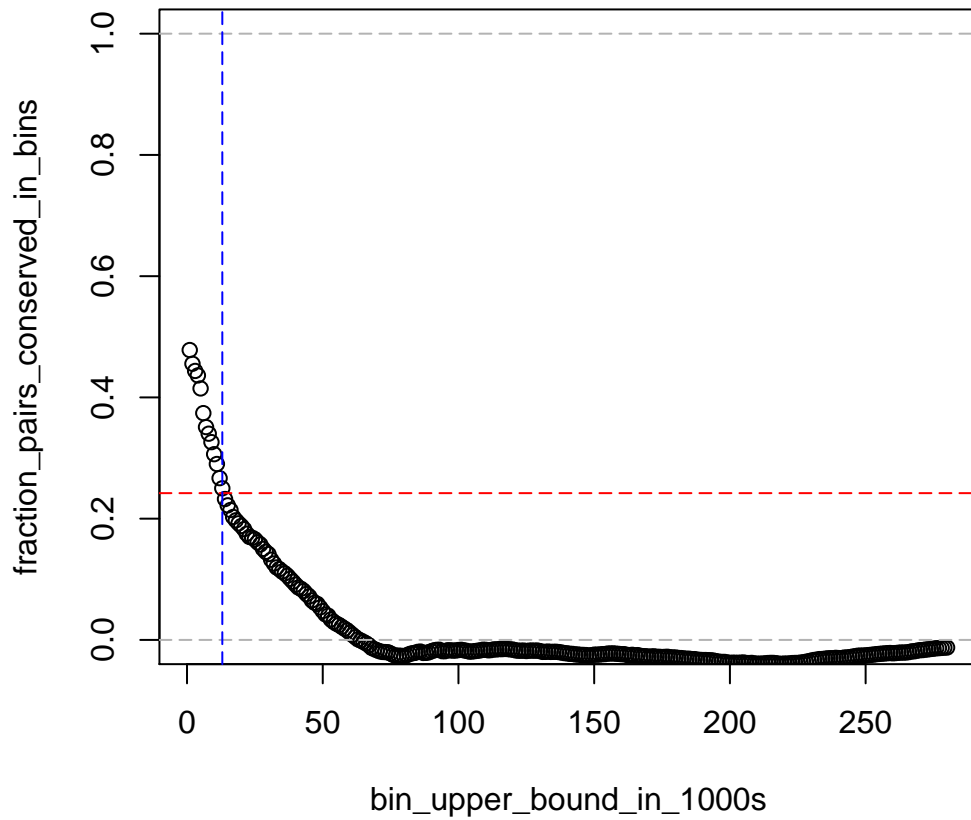

**Bin\_conservation\_minus\_bg\_CVM-1\_vs\_NTS-1**  
**PD-0.454347**

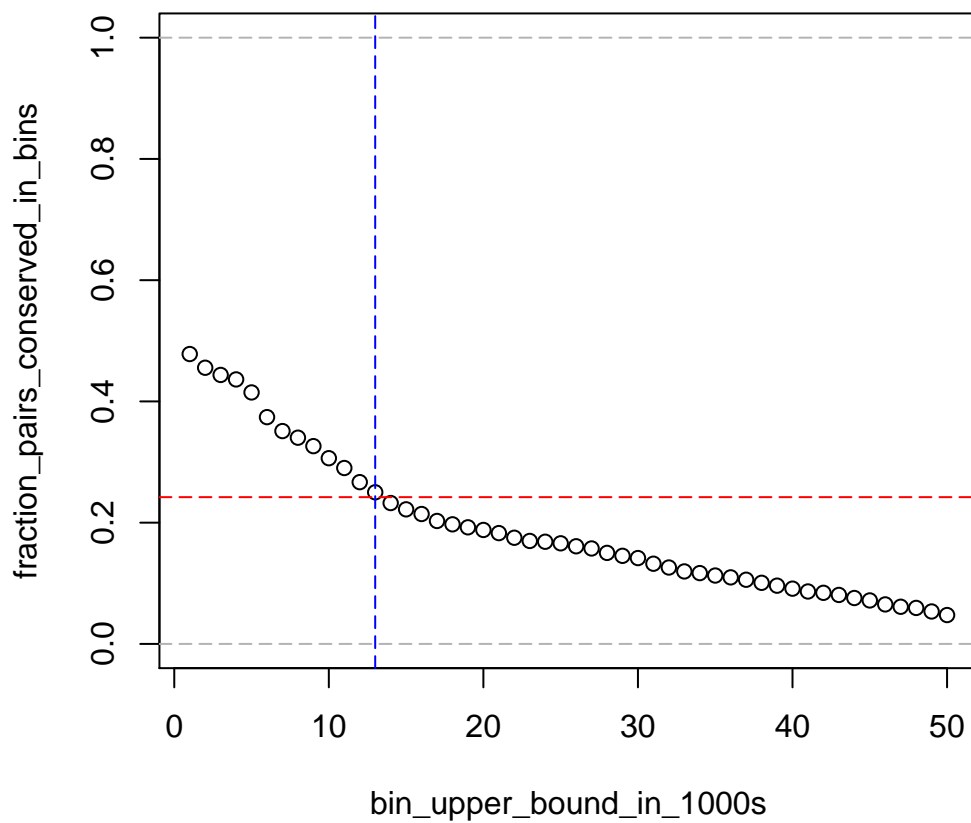

Supplement: s1 [file s1]

**Bin\_conservation\_minus\_bg\_PBCV1\_vs\_WI0606**  
**PD-0.680778**

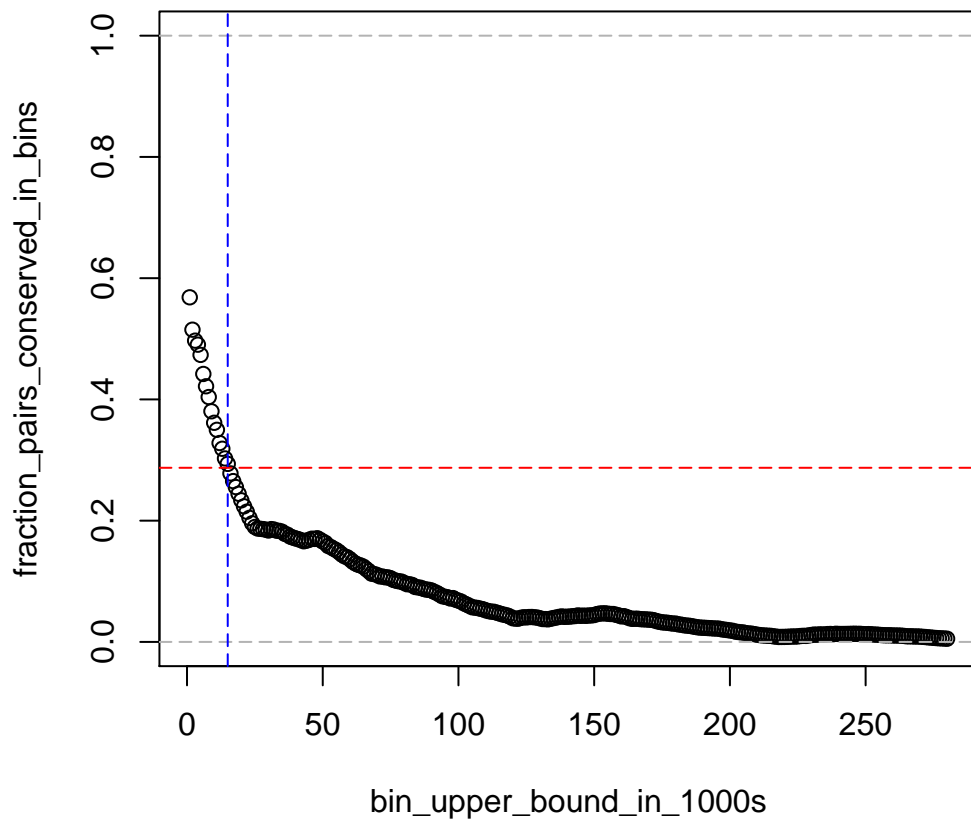

**Bin\_conservation\_minus\_bg\_PBCV1\_vs\_WI0606**  
**PD-0.680778**

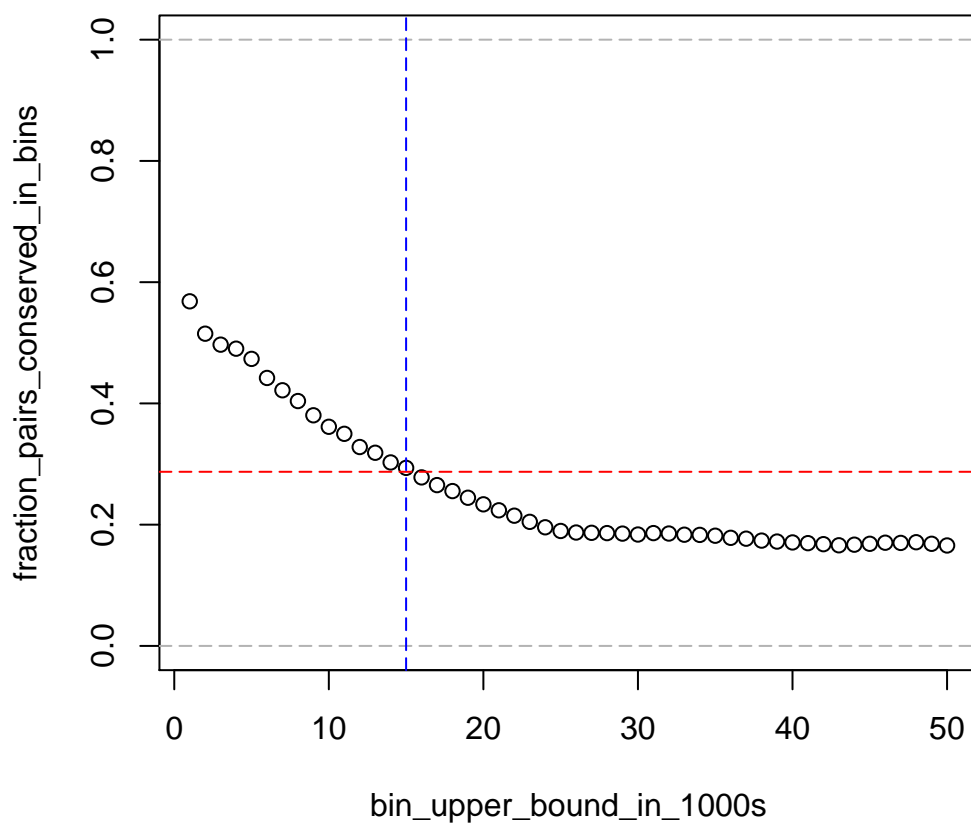

Supplement: s1 [file s1]

**Bin\_conservation\_minus\_bg\_KS1B\_vs\_NE-JV-4**  
**PD-0.013394**

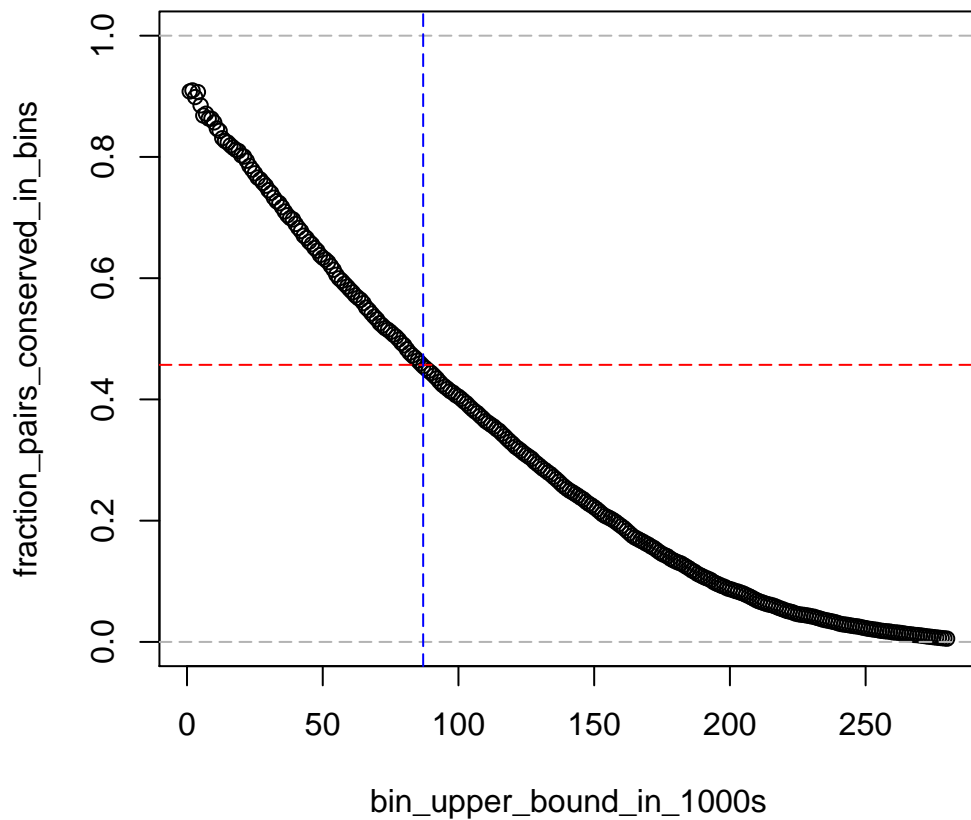

**Bin\_conservation\_minus\_bg\_KS1B\_vs\_NE-JV-4**  
**PD-0.013394**

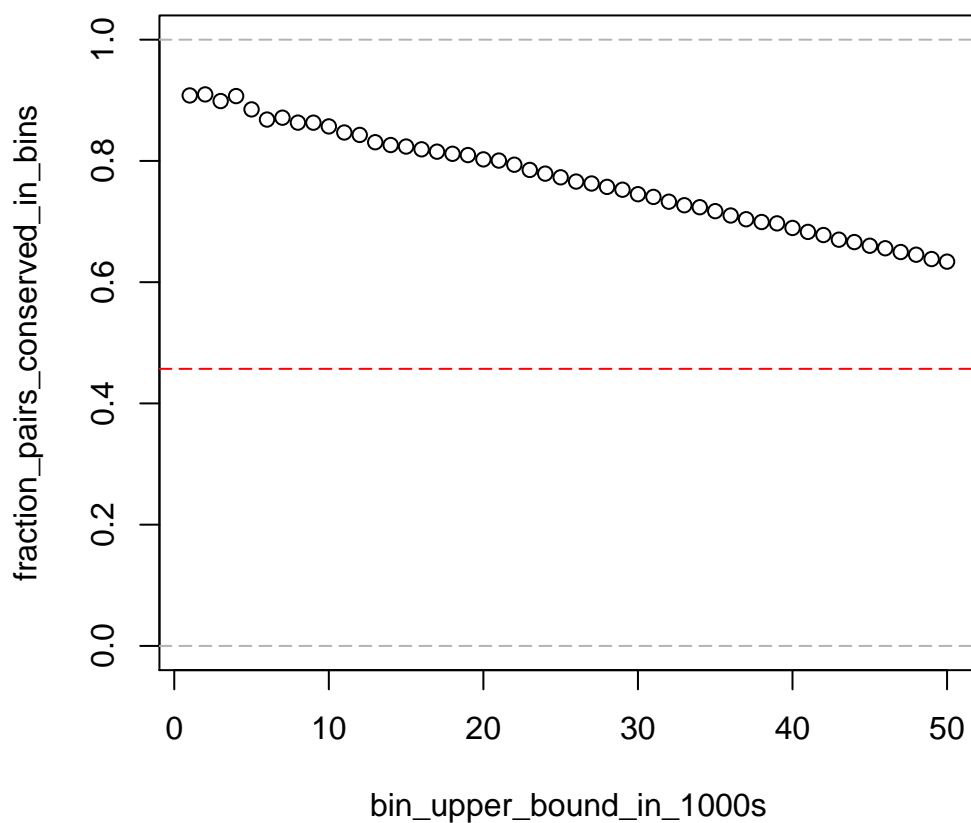

Supplement: s1 [file s1]

**Bin\_conservation\_minus\_bg\_Can0610SP\_vs\_NE-JV-3**  
**PD-0.01532**

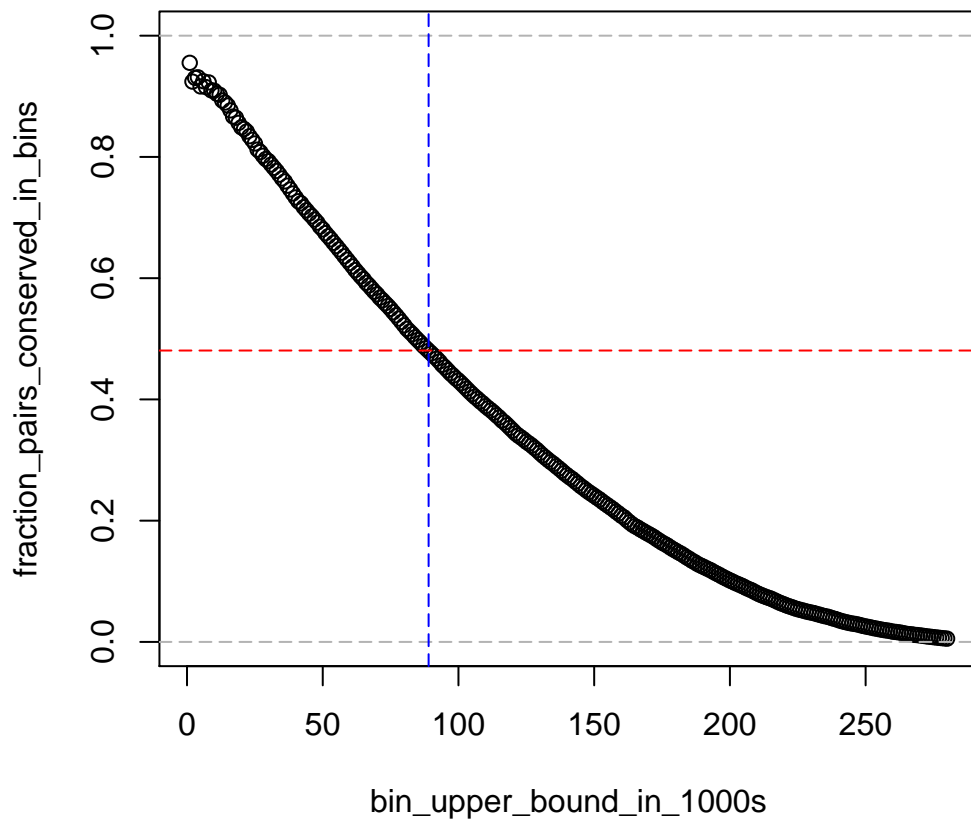

**Bin\_conservation\_minus\_bg\_Can0610SP\_vs\_NE-JV-3**  
**PD-0.01532**

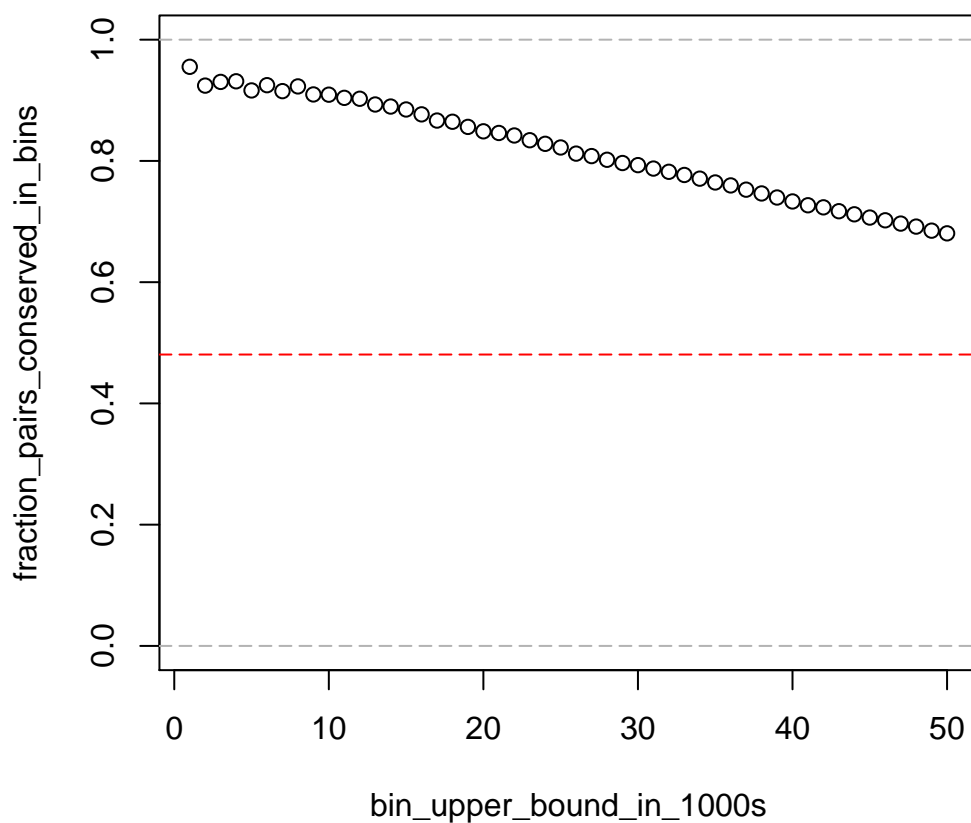

Supplement: s1 [file s1]

**Bin\_conservation\_minus\_bg\_AP110A\_vs\_IL-3A**  
**PD-0.64165**

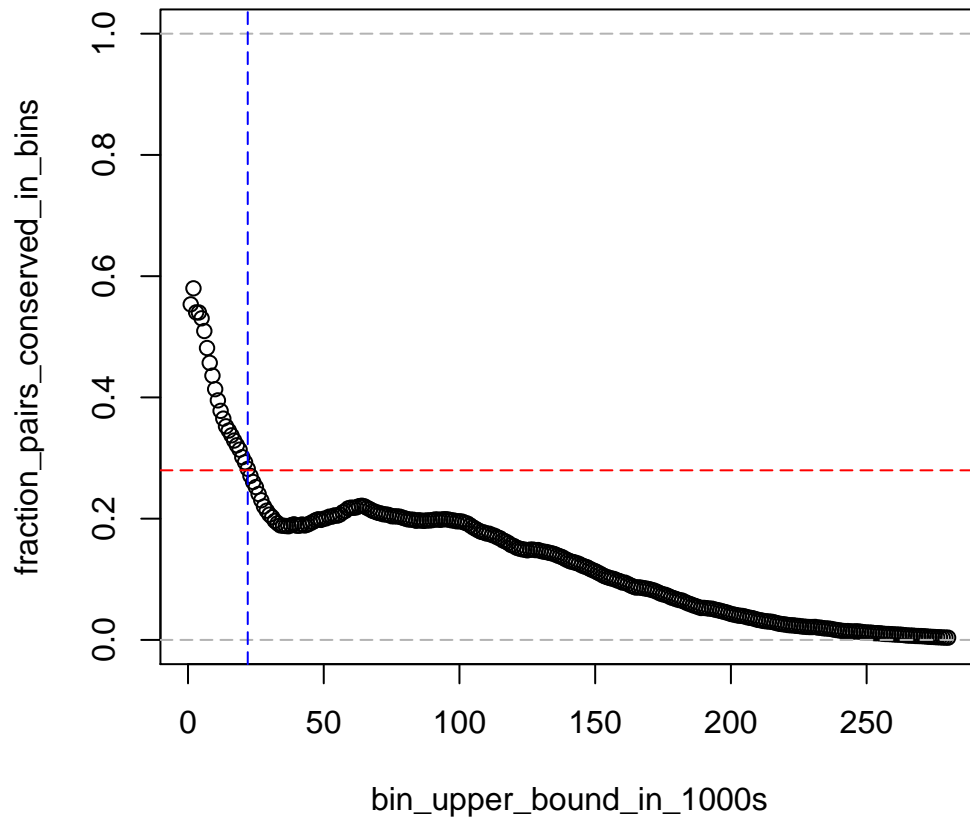

**Bin\_conservation\_minus\_bg\_AP110A\_vs\_IL-3A**  
**PD-0.64165**

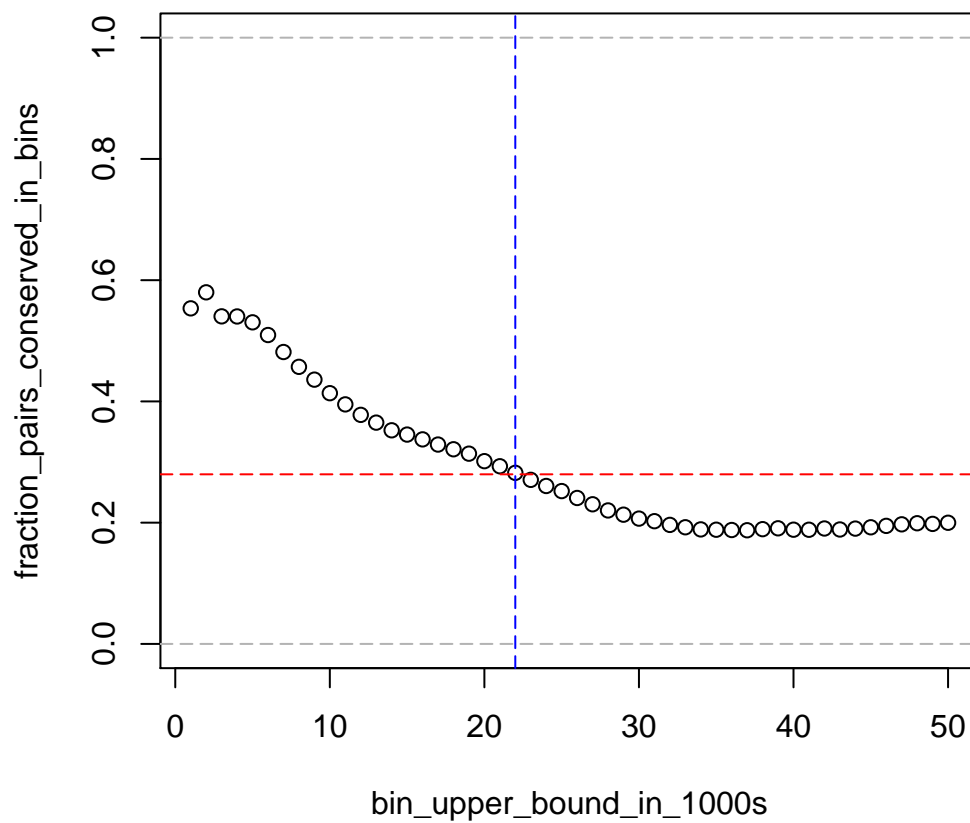

Supplement: s1 [file s1]

**Bin\_conservation\_minus\_bg\_CZ-2\_vs\_NE-JV-4**  
**PD-0.644591**

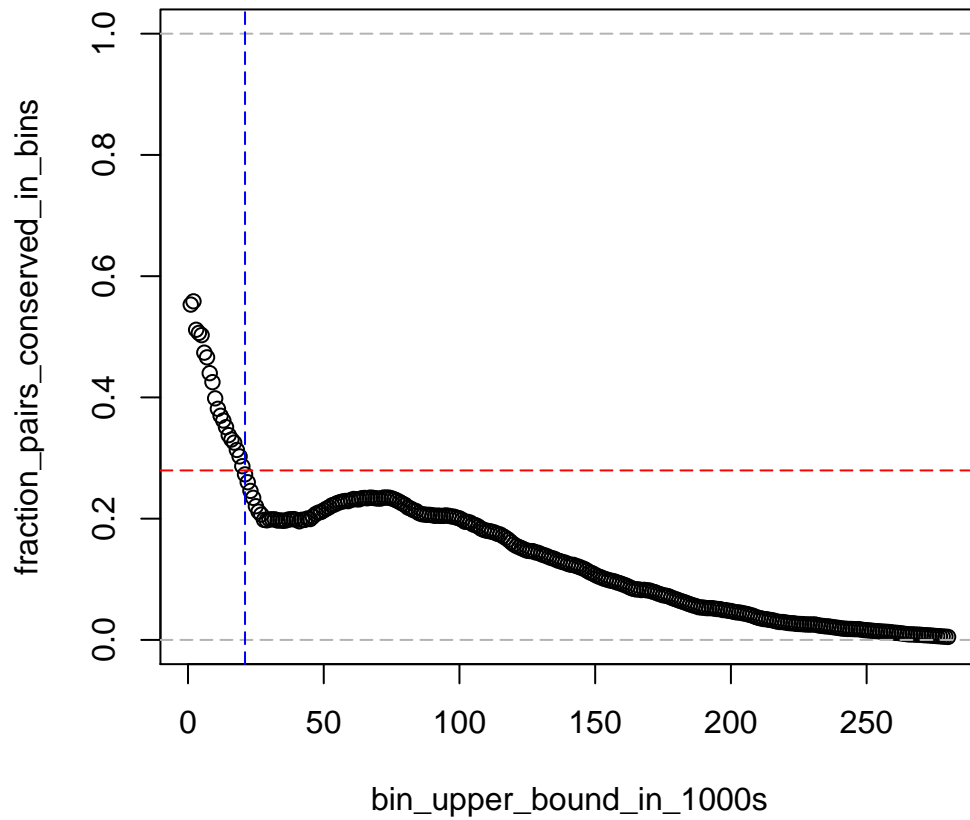

**Bin\_conservation\_minus\_bg\_CZ-2\_vs\_NE-JV-4**  
**PD-0.644591**

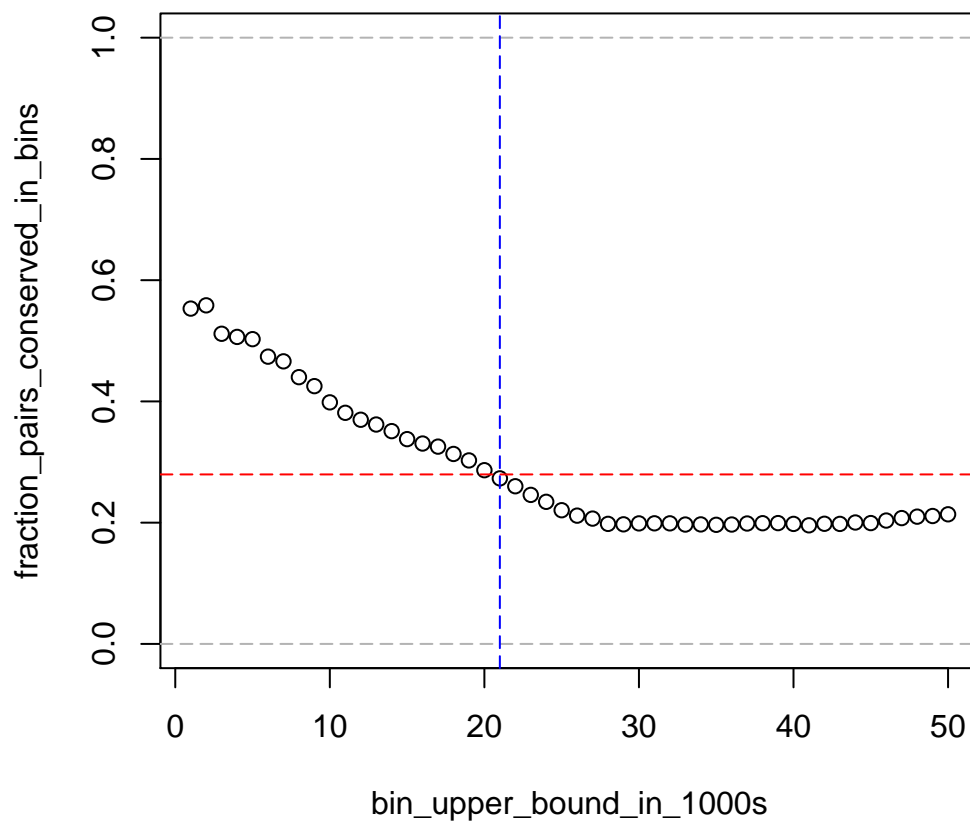

Supplement: s1 [file s1]

**Bin\_conservation\_minus\_bg\_CVR-1\_vs\_NTS-1**  
**PD-0.452574**

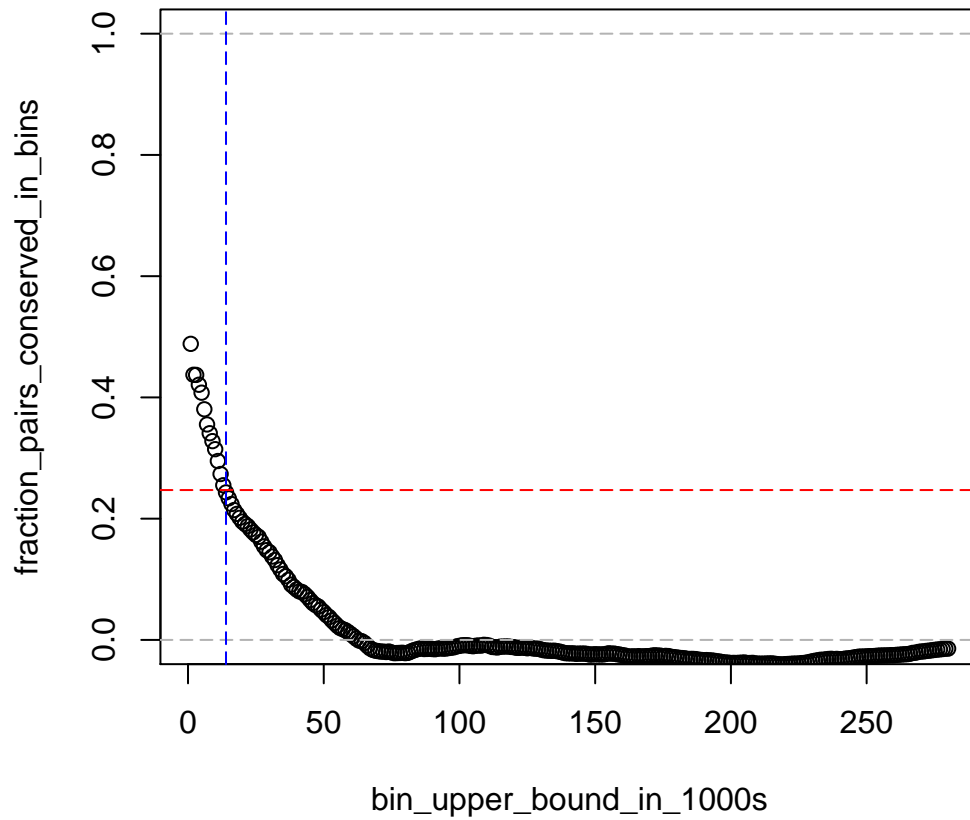

**Bin\_conservation\_minus\_bg\_CVR-1\_vs\_NTS-1**  
**PD-0.452574**

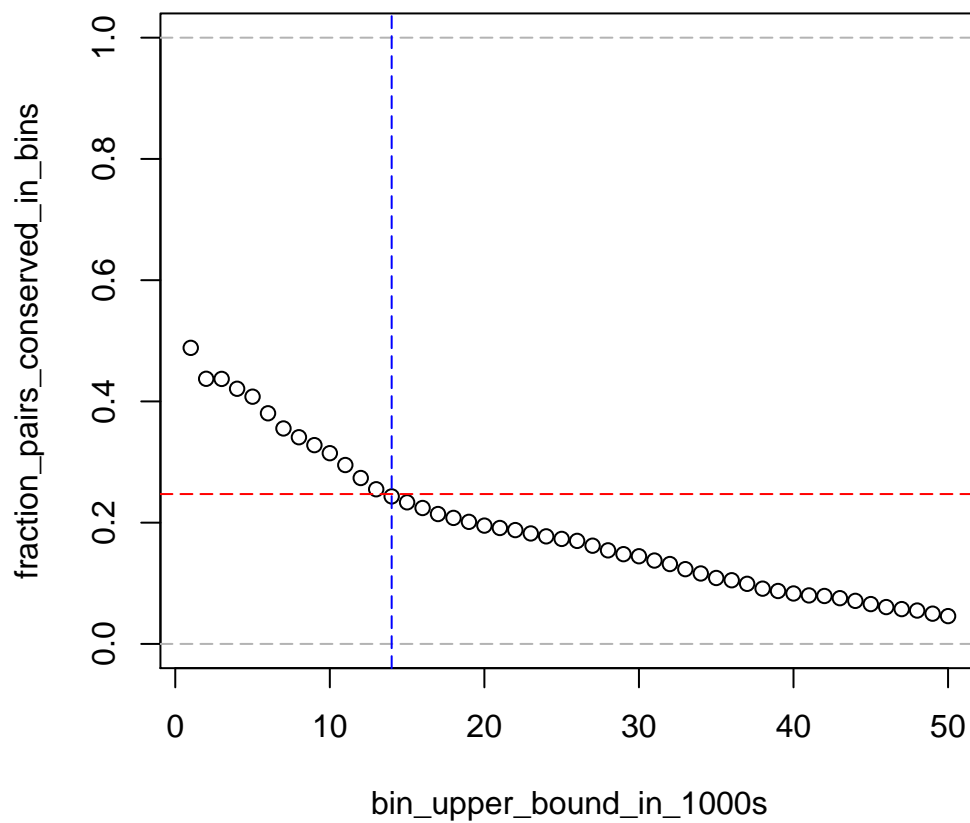

Supplement: s1 [file s1]

**Bin\_conservation\_minus\_bg\_NE-JV-4\_vs\_NTS-1**  
**PD-0.676625**

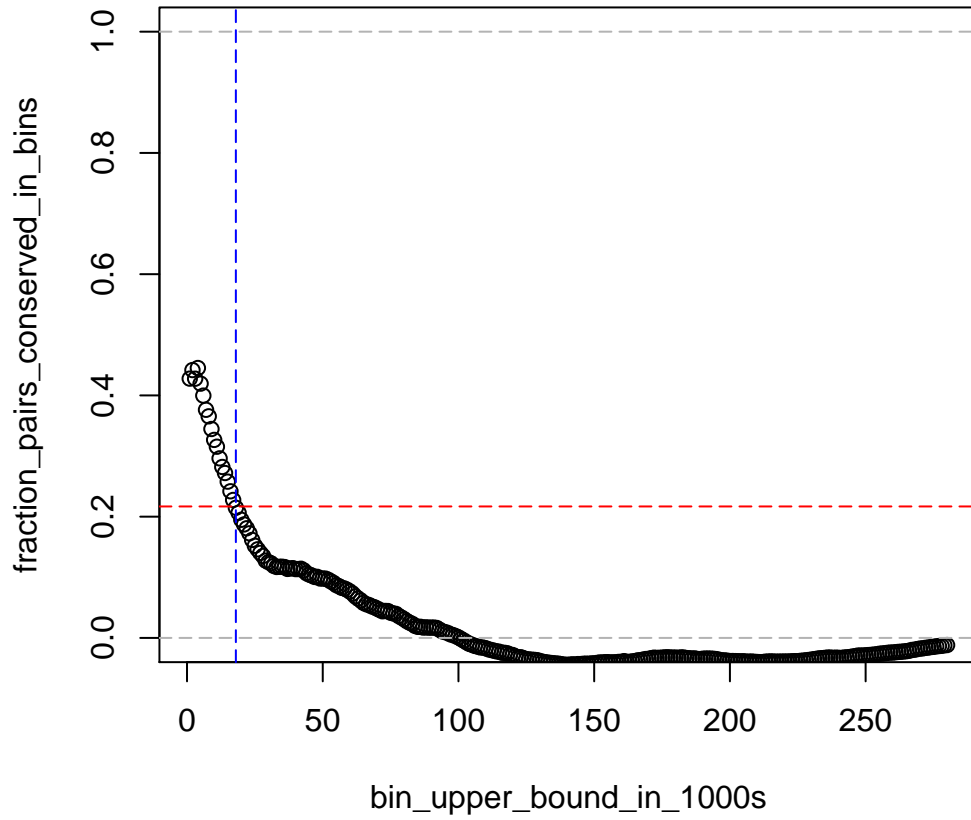

**Bin\_conservation\_minus\_bg\_NE-JV-4\_vs\_NTS-1**  
**PD-0.676625**

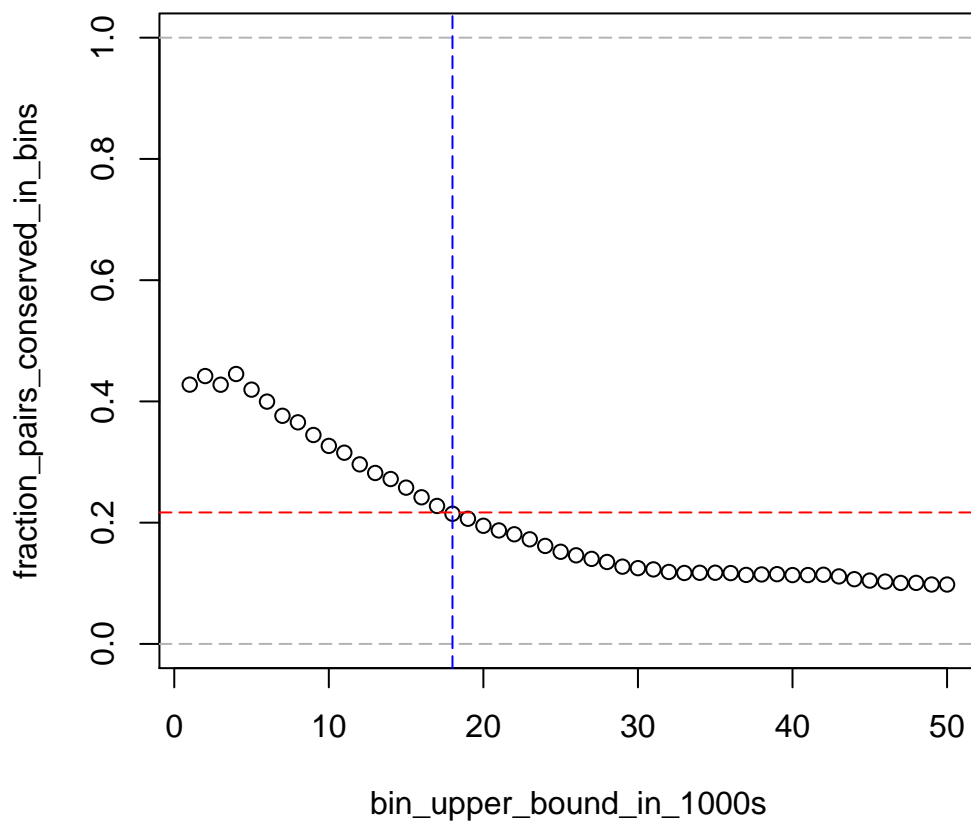

Supplement: s1 [file s1]

**Bin\_conservation\_minus\_bg\_CvsA1\_vs\_FR483**  
**PD-0.657617**

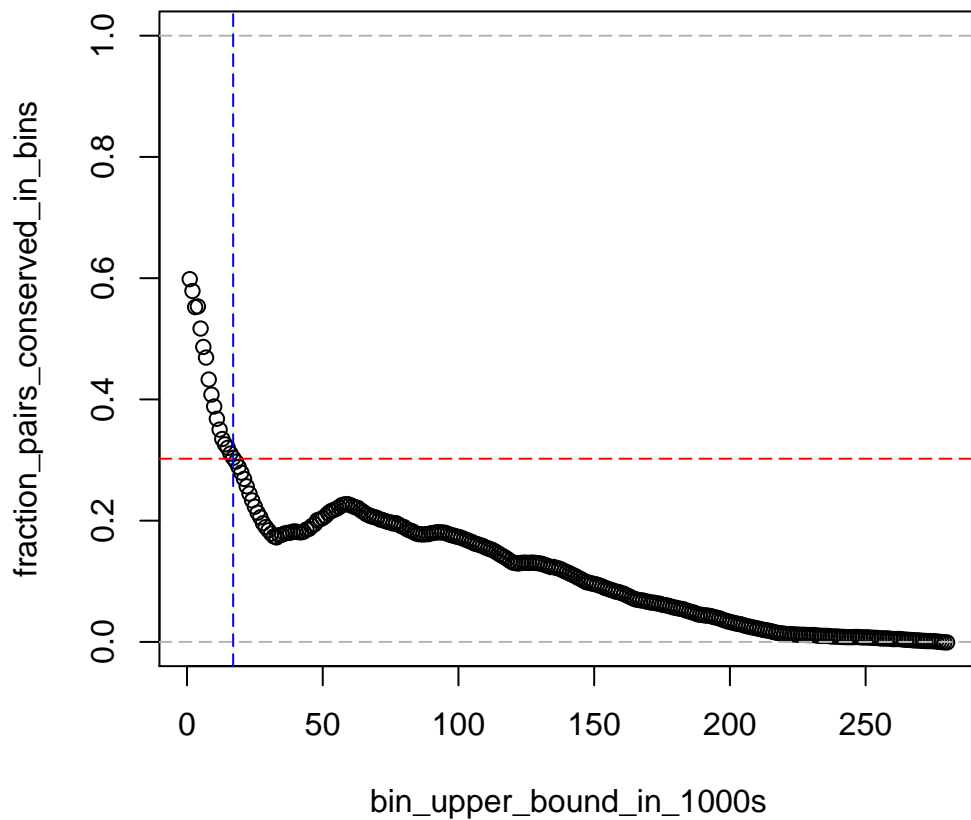

**Bin\_conservation\_minus\_bg\_CvsA1\_vs\_FR483**  
**PD-0.657617**

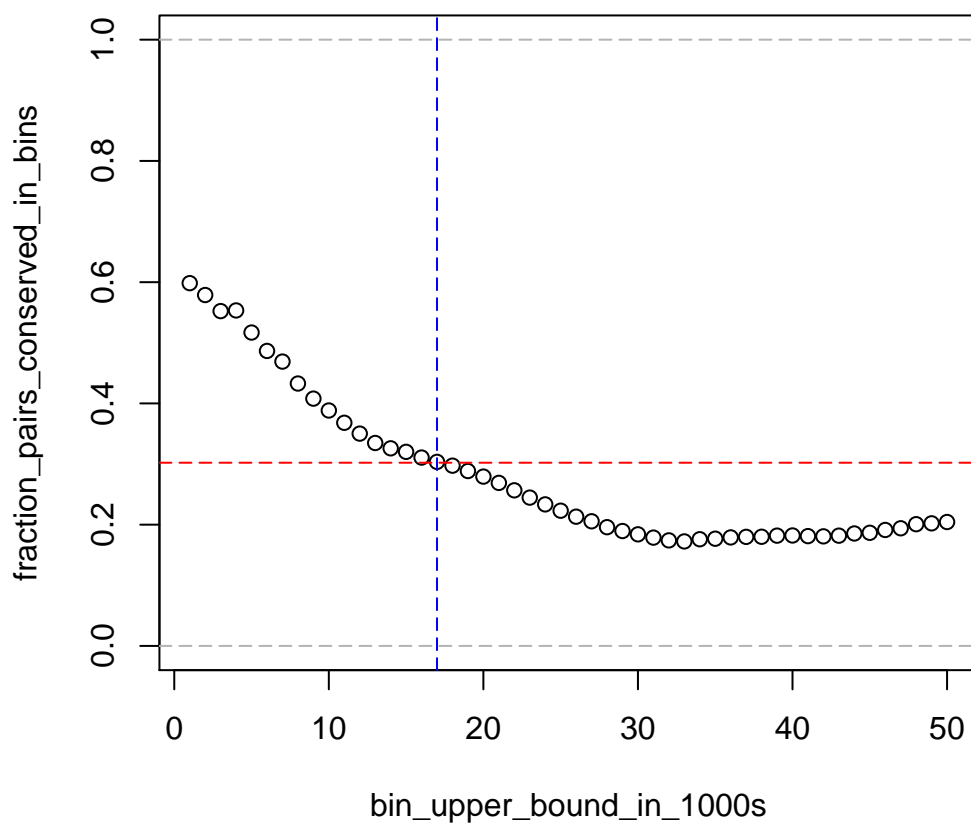

Supplement: s1 [file s1]

**Bin\_conservation\_minus\_bg\_MA-1D\_vs\_MA-1E**  
**PD-0.146199**

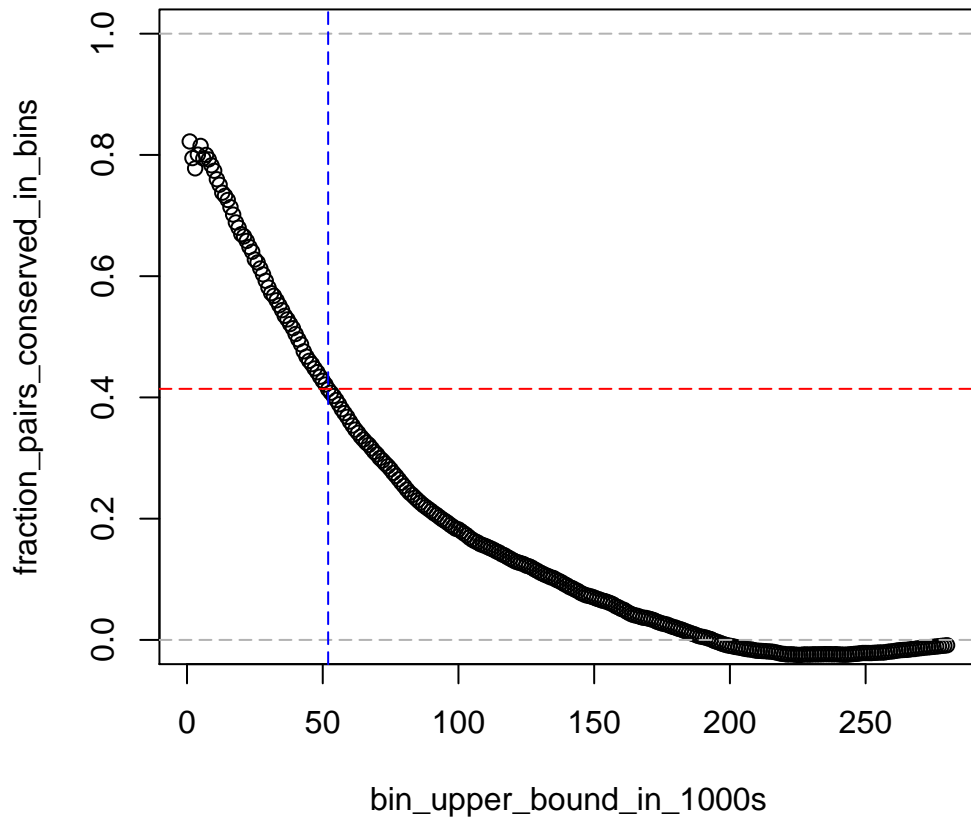

**Bin\_conservation\_minus\_bg\_MA-1D\_vs\_MA-1E**  
**PD-0.146199**

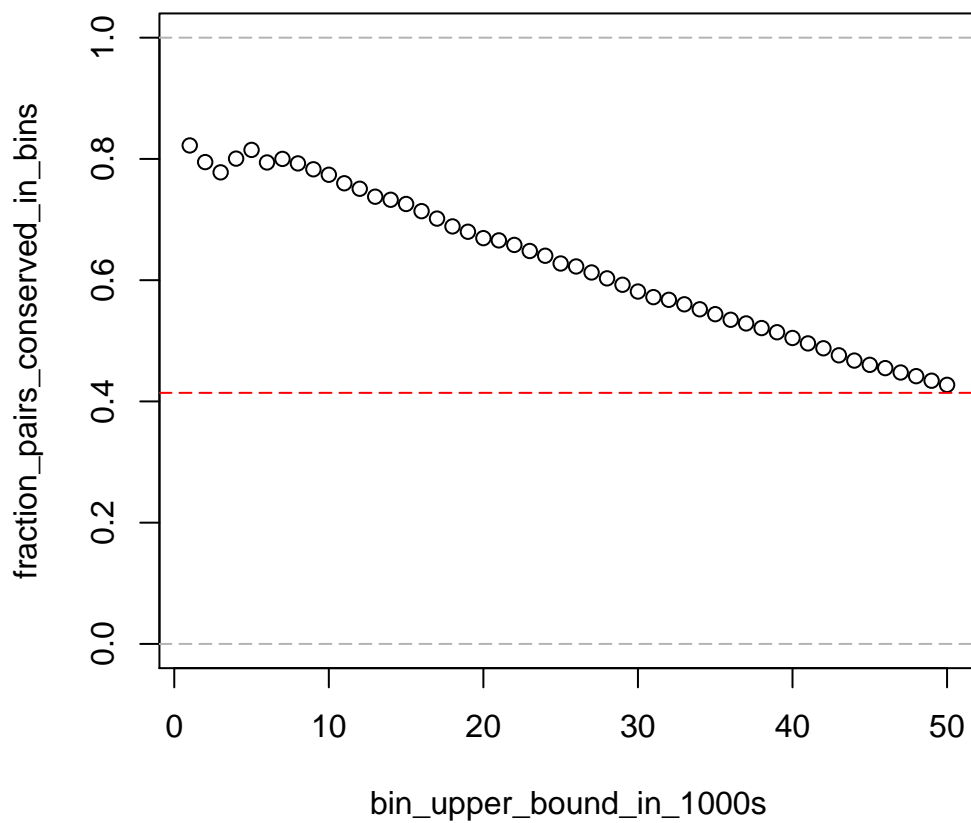

Supplement: s1 [file s1]

**Bin\_conservation\_minus\_bg\_NE-JV-1\_vs\_OR0704.2.2**  
**PD-0.356808**

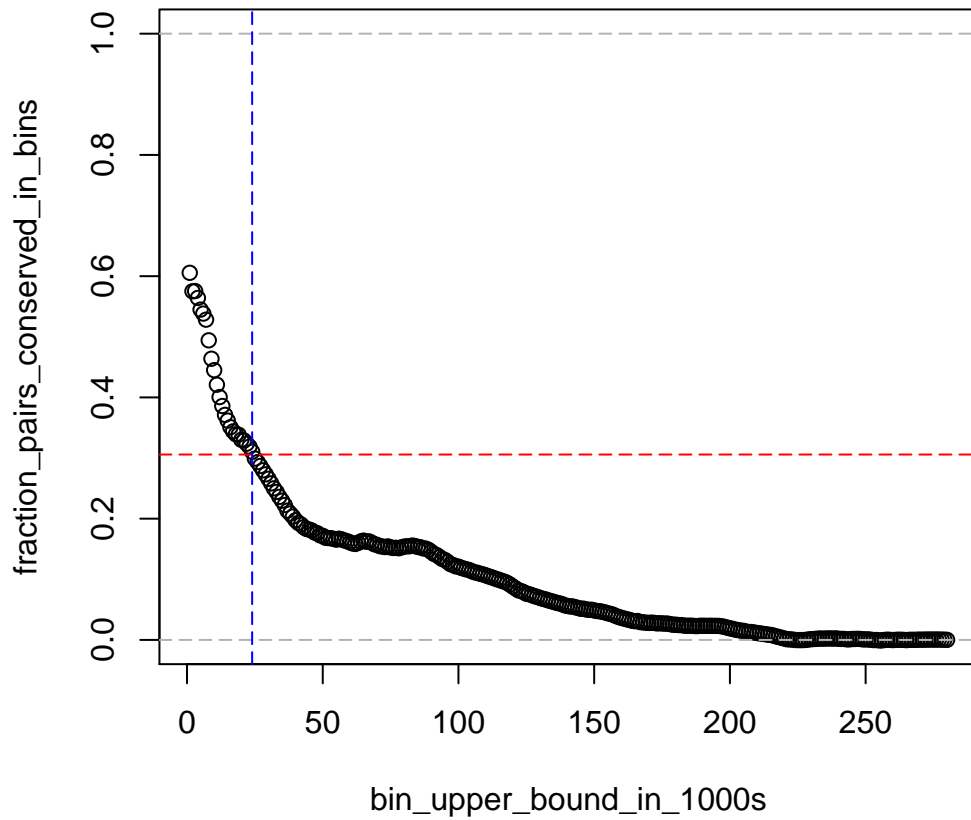

**Bin\_conservation\_minus\_bg\_NE-JV-1\_vs\_OR0704.2.2**  
**PD-0.356808**

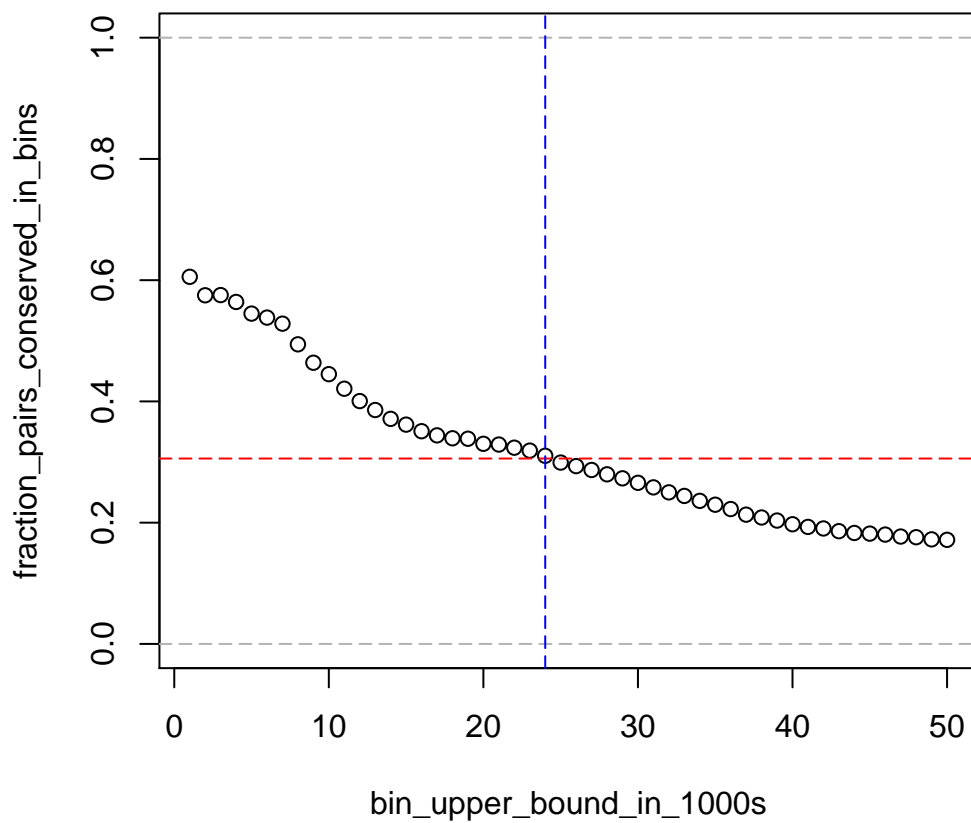

Supplement: s1 [file s1]

**Bin\_conservation\_minus\_bg\_MO0605SPH\_vs\_NE-JV-2**  
**PD-0.014578**

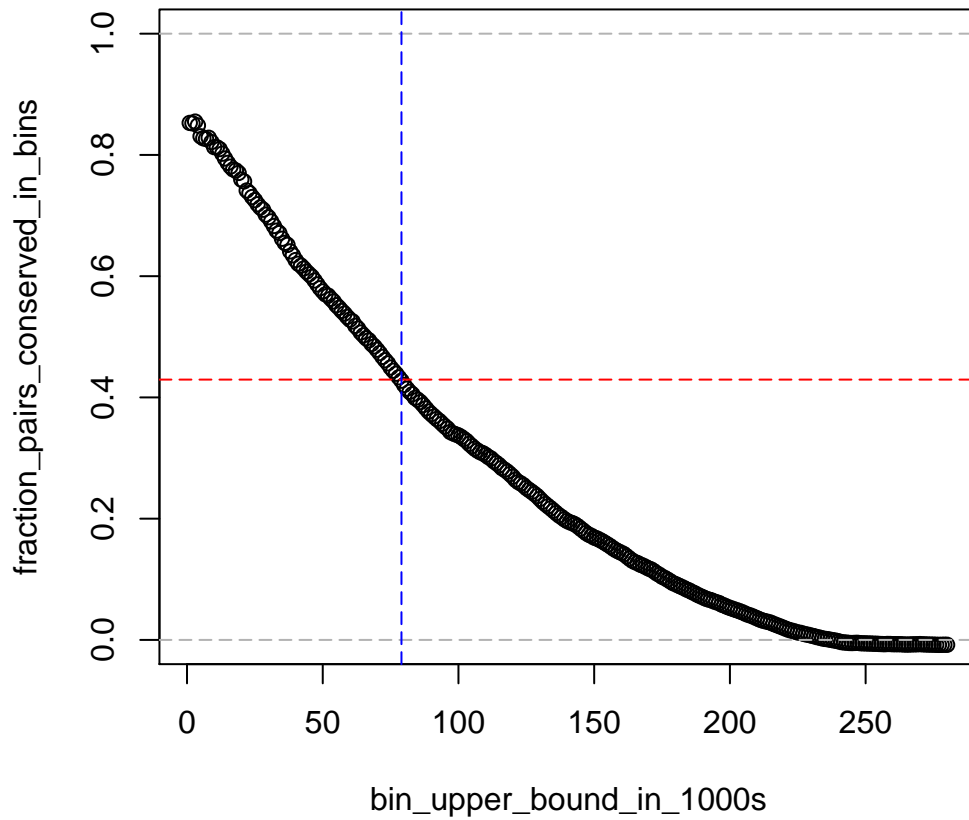

**Bin\_conservation\_minus\_bg\_MO0605SPH\_vs\_NE-JV-2**  
**PD-0.014578**

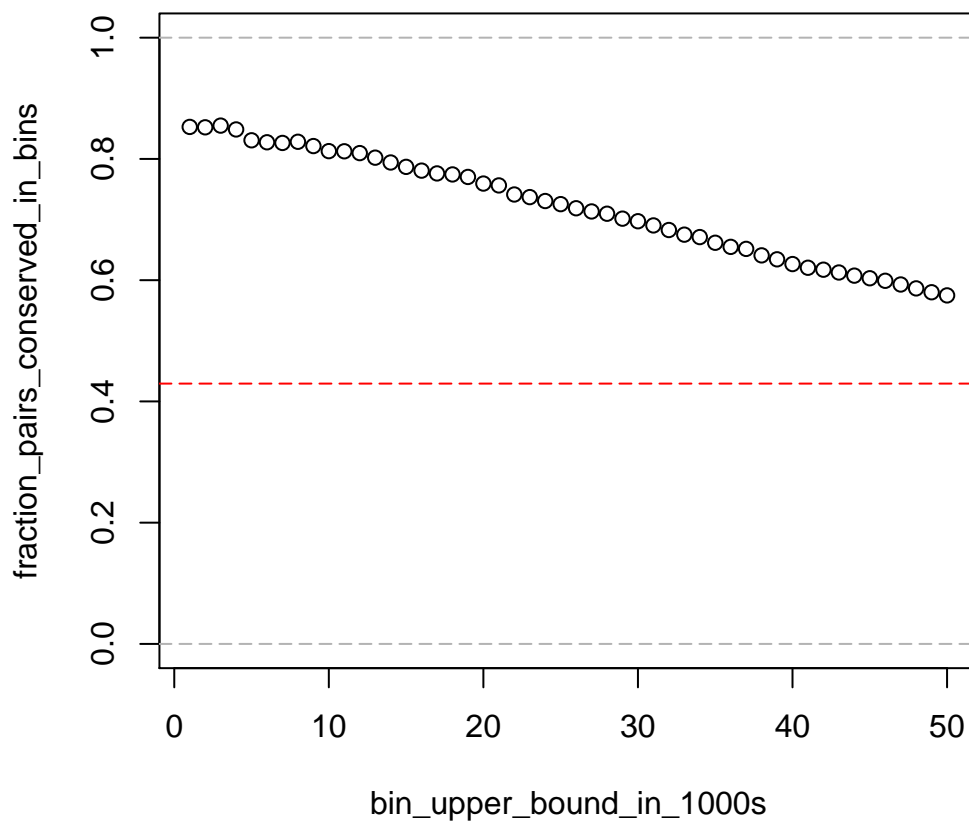

Supplement: s1 [file s1]

**Bin\_conservation\_minus\_bg\_NTS-1\_vs\_OR0704.3**  
**PD-0.048387**

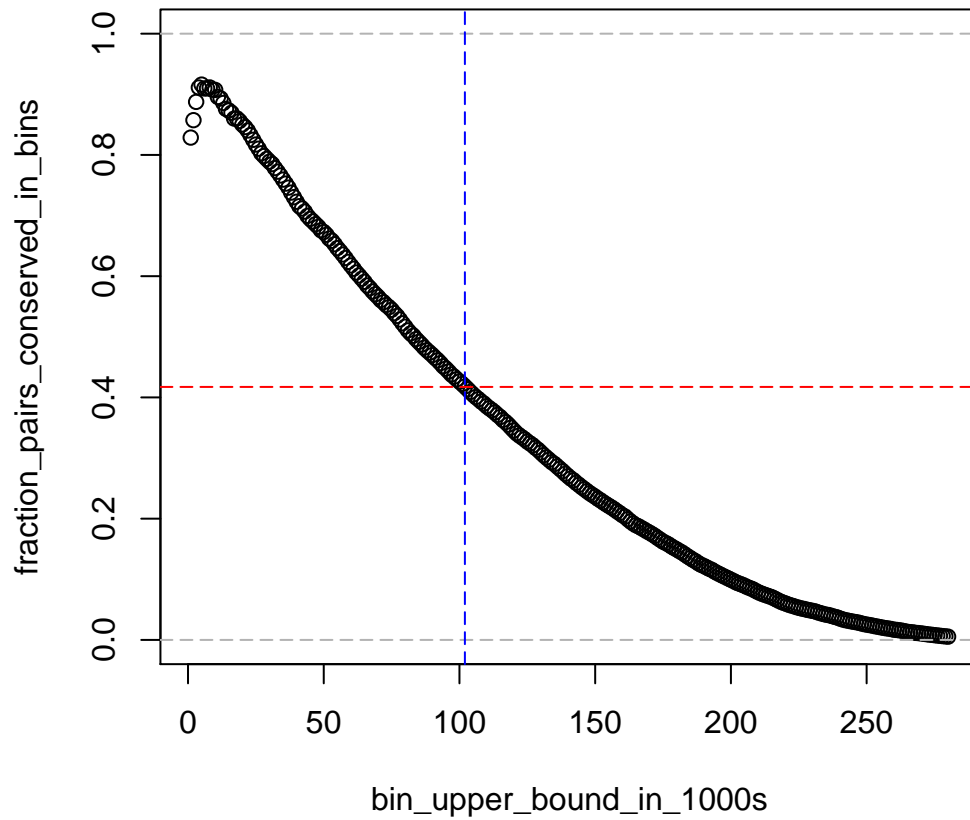

**Bin\_conservation\_minus\_bg\_NTS-1\_vs\_OR0704.3**  
**PD-0.048387**

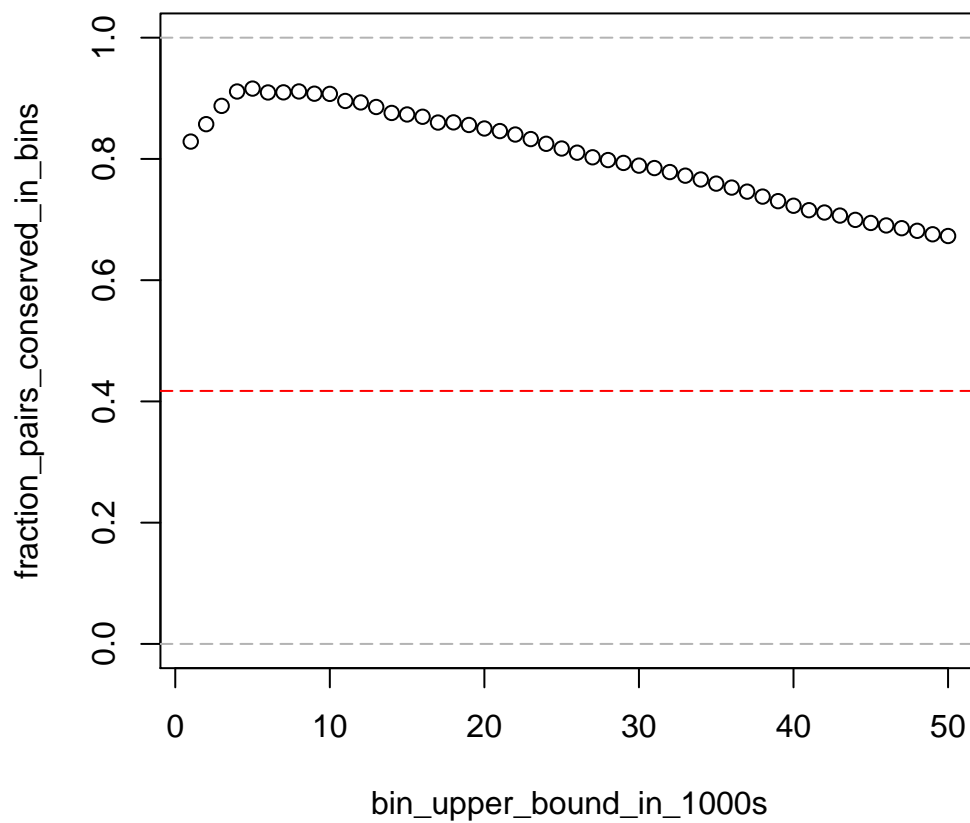

Supplement: s1 [file s1]

**Bin\_conservation\_minus\_bg\_CVA-1\_vs\_FR483**  
**PD-0.018334**

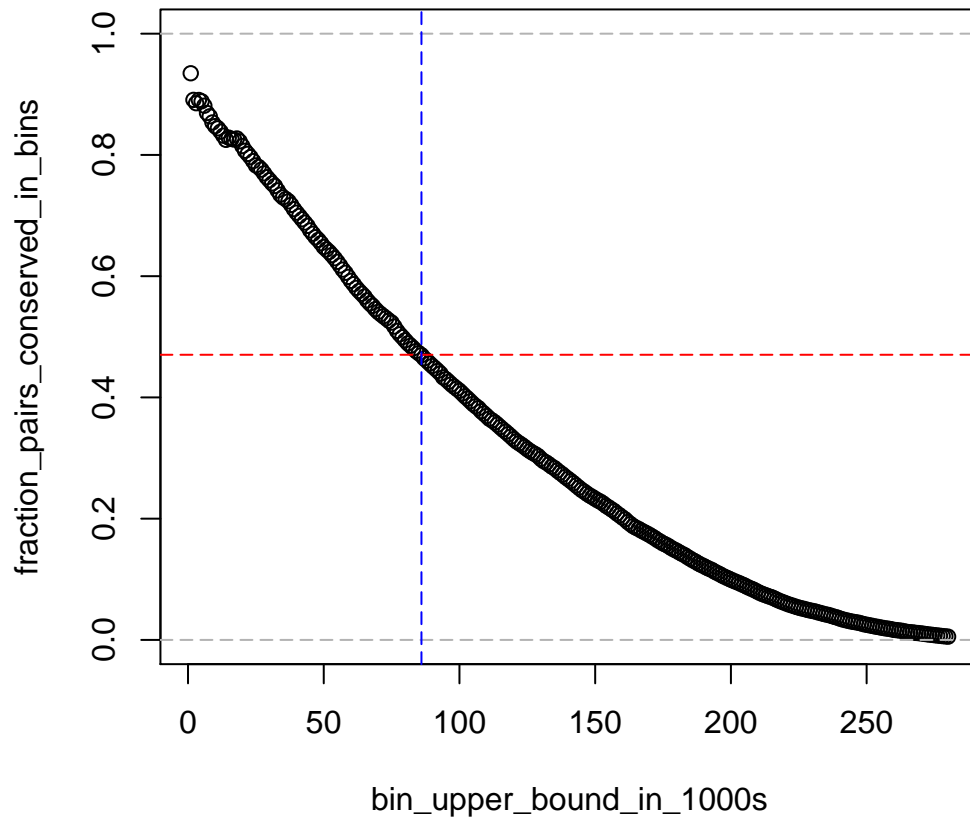

**Bin\_conservation\_minus\_bg\_CVA-1\_vs\_FR483**  
**PD-0.018334**

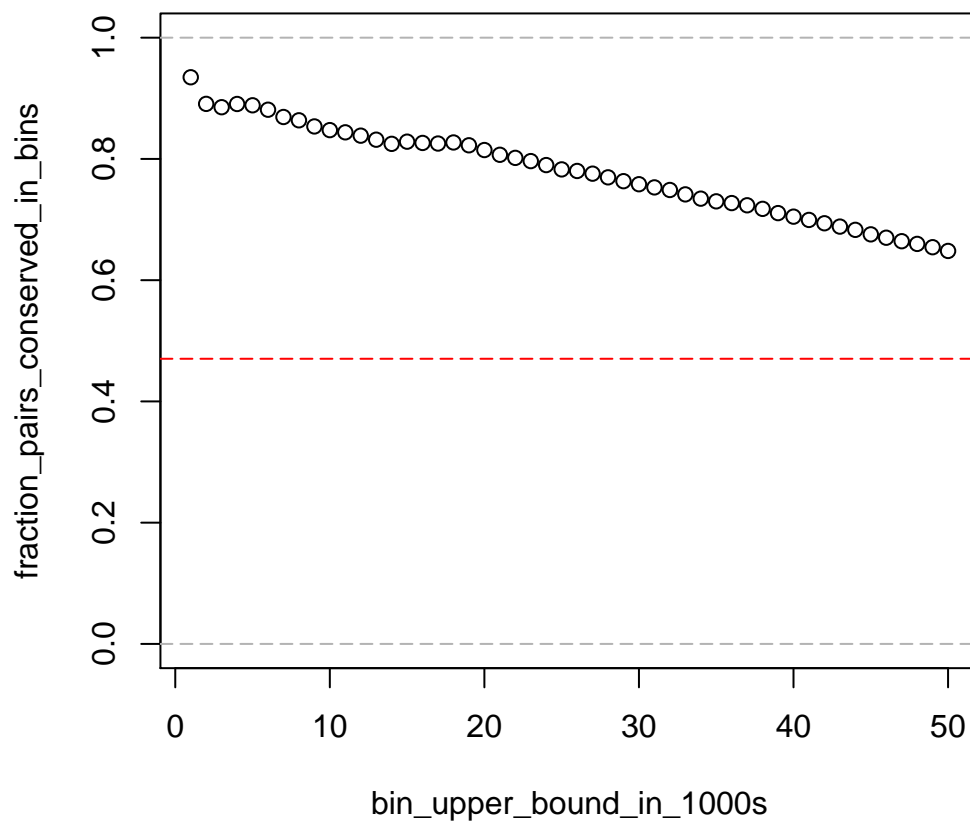

Supplement: s1 [file s1]

**Bin\_conservation\_minus\_bg\_CVR-1\_vs\_CZ-2**  
**PD-0.03921**

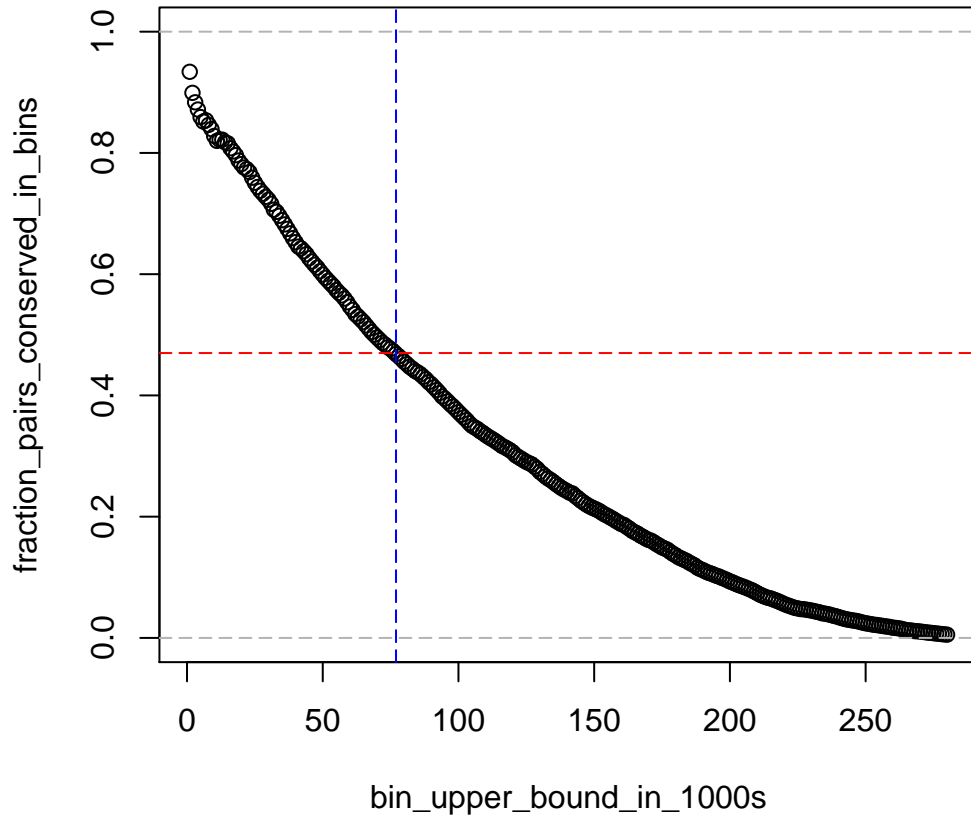

**Bin\_conservation\_minus\_bg\_CVR-1\_vs\_CZ-2**  
**PD-0.03921**

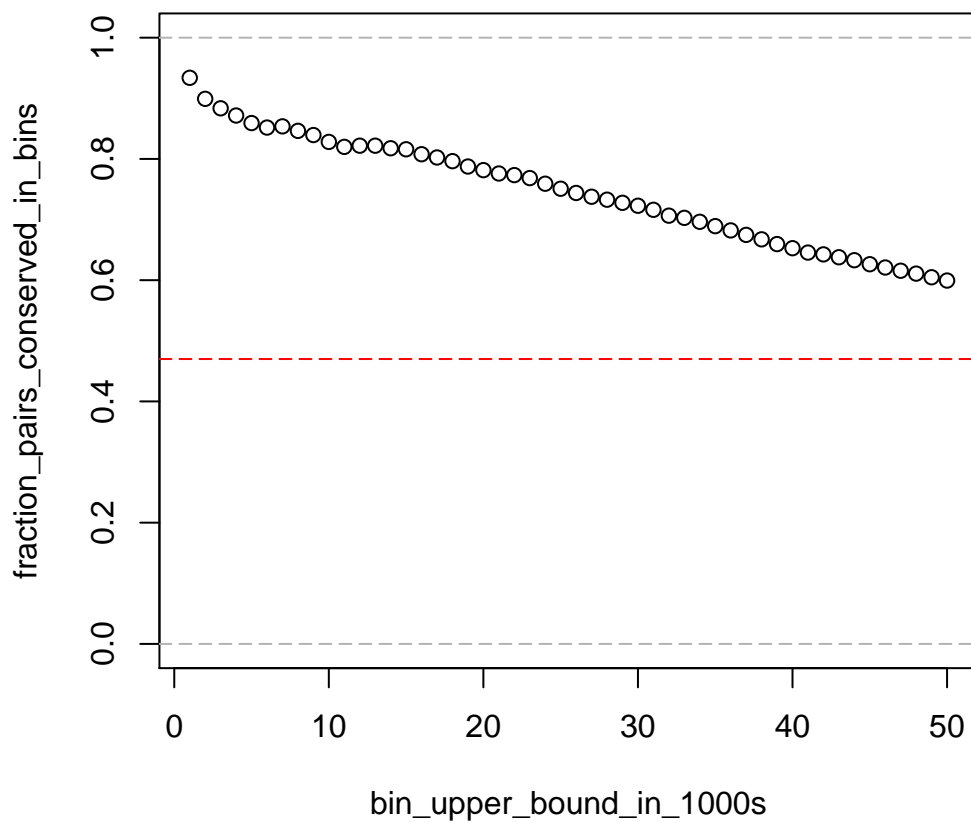

Supplement: s1 [file s1]

**Bin\_conservation\_minus\_bg\_GM0701.1\_vs\_MA-1D**  
**PD-0.690554**

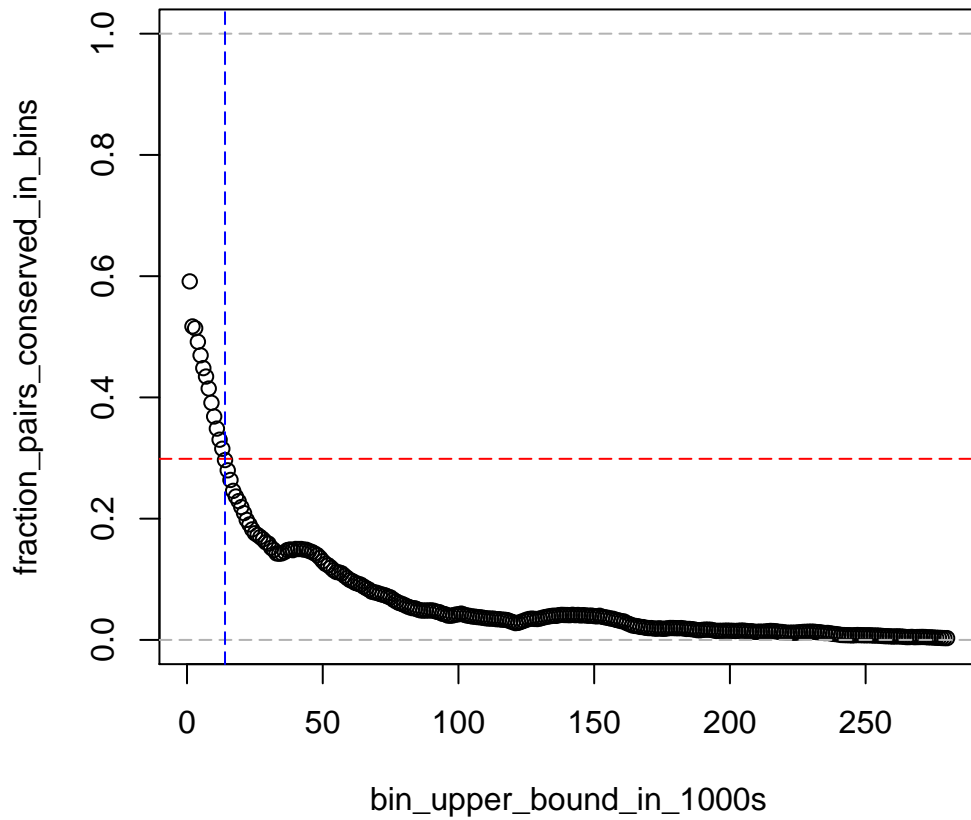

**Bin\_conservation\_minus\_bg\_GM0701.1\_vs\_MA-1D**  
**PD-0.690554**

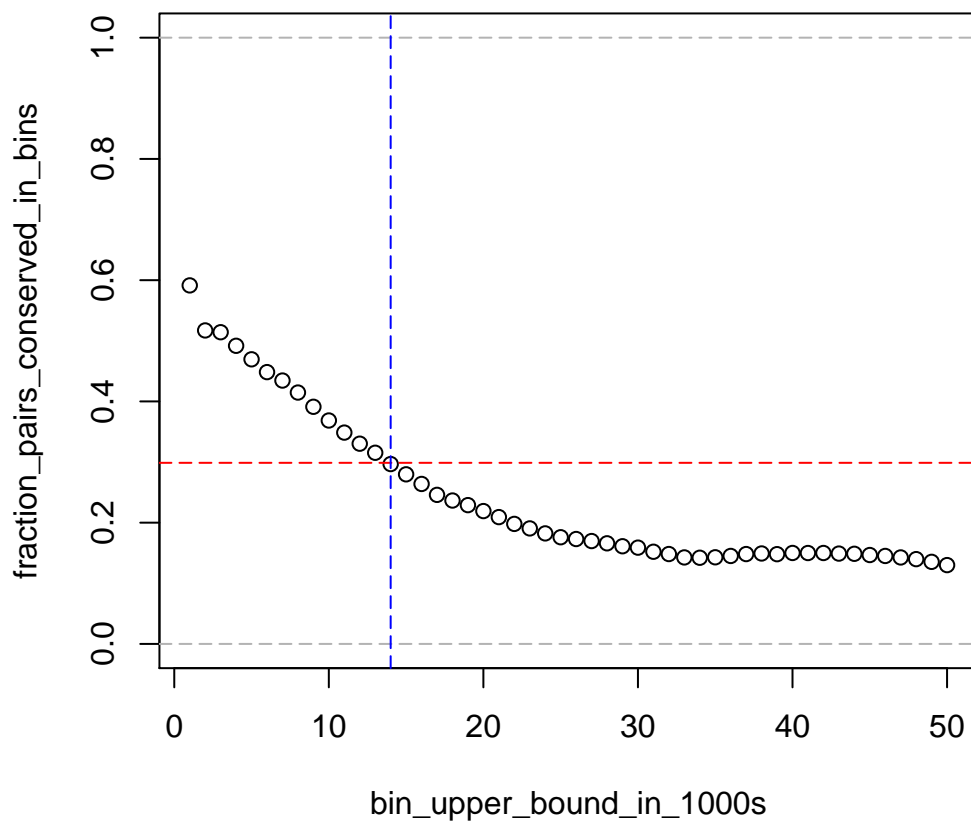

Supplement: s1 [file s1]
